# Supplementary material
Source: PubMed Central journal article supplement (PMC4034692)
Supplement: NIHMS506026-supplement-1_si_003.pdf [file NIHMS506026-supplement-1_si_003.pdf]

| Chromsom | Start    | End      | NovelEvent | Peptides   | EventProb | TotalNumP | OverlapsKr | NumOfUni |
|----------|----------|----------|------------|------------|-----------|-----------|------------|----------|
| chrV     | 10497036 | 10499387 | FrameShift | R.RMSNKC'  | 0.998387  | 1         | TRUE       | 1        |
| chrIII   | 13204881 | 13207293 | NovelExon  | R.CDLHKMI  | 0.995345  | 1         | TRUE       | 1        |
| chrII    | 11171387 | 11175420 | FrameShift | K.YRSDYLK  | 0.999097  | 1         | TRUE       | 1        |
| chrIII   | 11485374 | 11487247 | NovelExon  | K.KFQFFQK  | 0.997604  | 1         | TRUE       | 1        |
| chrV     | 15571471 | 15574087 | GeneBounc  | R.FPSIFLEF | 0.999942  | 2         | FALSE      | 2        |
| chrII    | 3403922  | 3406791  | FrameShift | R.RVMIIITK | 0.996771  | 1         | TRUE       | 1        |
| chrV     | 10566372 | 10576398 | NovelExon  | K.RAGMTLI  | 0.994994  | 1         | TRUE       | 1        |
| chrI     | 10590709 | 10593951 | ExonBounc  | K.LQIFETPF | 0.995698  | 1         | TRUE       | 1        |
| chrX     | 15173834 | 15178056 | ReverseStr | R.TLGTGLR  | 0.999997  | 2         | TRUE       | 2        |
| chrII    | 2767253  | 2769135  | ExonBounc  | R.IYIPAMLK | 0.999223  | 1         | TRUE       | 1        |
| chrI     | 11649973 | 11651903 | NovelExon  | R.RPAKYGV  | 0.995854  | 1         | TRUE       | 1        |
| chrII    | 9190312  | 9194235  | NovelExon  | A.IMNGDF   | 0.99644   | 1         | TRUE       | 1        |
| chrI     | 13814739 | 13827969 | FrameShift | R.FYYRKKG  | 0.995891  | 1         | TRUE       | 1        |
| chrX     | 845729   | 851506   | ExonBounc  | _.PTYLFQVI | 0.997422  | 1         | TRUE       | 1        |
| chrII    | 11370251 | 11372009 | ReverseStr | K.LIDFIAGR | 1         | 3         | TRUE       | 3        |
| chrV     | 16227134 | 16229873 | ReverseStr | R.LLFTKGEF | 1         | 4         | TRUE       | 4        |
| chrII    | 12694342 | 12725413 | NovelExon  | K.KMRKKRI  | 0.994517  | 1         | TRUE       | 1        |
| chrI     | 9653092  | 9656291  | FrameShift | K.SYWNLIM  | 0.998915  | 1         | TRUE       | 1        |
| chrX     | 2275435  | 2279220  | NovelGene  | K.DKFFSELE | 1         | 3         | FALSE      | 3        |
| chrII    | 1874281  | 1875111  | ExonBounc  | E.MVIGDM   | 0.994707  | 1         | TRUE       | 1        |
| chrII    | 11527177 | 11533750 | FrameShift | K.KWNASR   | 1         | 1         | TRUE       | 1        |
| chrV     | 246608   | 251747   | ExonBounc  | K.VSVMDA   | 0.994686  | 1         | TRUE       | 1        |
| chrIII   | 11488255 | 11500635 | NovelExon  | K.NRATELC  | 0.997484  | 1         | TRUE       | 1        |
| chrV     | 4770694  | 4773077  | NovelExon  | R.QNGKPAI  | 0.998109  | 1         | TRUE       | 1        |
| chrX     | 5101001  | 5106142  | FrameShift | R.YSSECPE  | 1         | 4         | TRUE       | 4        |
| chrX     | 8748776  | 8750917  | ReverseStr | _.ARCHGVI  | 0.99998   | 2         | TRUE       | 2        |
| chrV     | 13916482 | 13918037 | FrameShift | _.APLHNIM  | 0.994605  | 1         | TRUE       | 1        |
| chrX     | 13552271 | 13556095 | NovelExon  | _.EHSKHLN  | 0.995993  | 1         | TRUE       | 1        |
| chrIV    | 13883537 | 13884019 | GeneBounc  | Q.DHTNHN   | 0.999998  | 2         | FALSE      | 2        |
| chrIII   | 12061639 | 12071897 | NovelExon  | K.ENSPPTS' | 0.996083  | 1         | TRUE       | 1        |
| chrI     | 3733471  | 3740482  | ExonBounc  | K.RAKNFKA  | 0.994013  | 1         | TRUE       | 1        |
| chrII    | 4405864  | 4416686  | ReverseStr | K.KSEKSGQ  | 0.999973  | 2         | TRUE       | 2        |
| chrIII   | 6553522  | 6558522  | ReverseStr | R.ALLTNSM  | 1         | 3         | TRUE       | 2        |
| chrX     | 5101001  | 5106142  | ExonBounc  | R.DEEQSDE  | 0.999646  | 1         | TRUE       | 1        |
| chrV     | 11675924 | 11685259 | NovelExon  | R.VLPTVFY) | 0.999664  | 1         | TRUE       | 1        |
| chrIV    | 8818635  | 8819117  | GeneBounc  | K.RRWMGF   | 0.999951  | 2         | FALSE      | 2        |
| chrX     | 5058336  | 5058702  | ReverseStr | K.LEMSMS'  | 1         | 3         | TRUE       | 3        |
| chrIV    | 205239   | 208004   | FrameShift | _.NGKAIGA  | 1         | 1         | TRUE       | 1        |
| chrX     | 9810173  | 9822215  | FrameShift | K.HVYIQFYI | 0.998778  | 1         | TRUE       | 1        |
| chrIII   | 1398164  | 1401391  | ReverseStr | K.KLSMLNK  | 0.999993  | 2         | TRUE       | 2        |
| chrIII   | 8133599  | 8136583  | FrameShift | K.FAVADEE  | 1         | 1         | TRUE       | 1        |
| chrV     | 5493731  | 5502994  | NovelExon  | _.LPCFNFP  | 0.99708   | 1         | TRUE       | 1        |
| chrII    | 9591243  | 9592874  | GeneBounc  | _.IIFVDVVK | 0.999973  | 2         | FALSE      | 2        |
| chrI     | 13724563 | 13731978 | GeneBounc  | R.VGVEMV   | 0.999952  | 2         | FALSE      | 2        |
| chrII    | 9671549  | 9673202  | ReverseStr | R.NLESRRN  | 0.999972  | 2         | FALSE      | 2        |
| chrV     | 5907391  | 5909603  | FrameShift | V.ELEQLVQ  | 0.994454  | 1         | TRUE       | 1        |

|        |          |          |            |            |          |   |       |   |
|--------|----------|----------|------------|------------|----------|---|-------|---|
| chrI   | 1629011  | 1633498  | GeneBound  | _.KIAYNSDI | 0.999946 | 2 | FALSE | 2 |
| chrV   | 724361   | 728104   | ReverseStr | K.ERDRYSP  | 1        | 4 | TRUE  | 3 |
| chrIII | 5480264  | 5483745  | ReverseStr | R.KTFSTKFK | 0.999932 | 2 | TRUE  | 2 |
| chrI   | 745756   | 748510   | ReverseStr | K.PTPWSKF  | 0.999991 | 2 | TRUE  | 2 |
| chrX   | 10104553 | 10125424 | NovelExon  | K.LRETECLA | 0.997398 | 1 | TRUE  | 1 |
| chrX   | 14322939 | 14326730 | FrameShift | K.SKMDKSF  | 0.997199 | 1 | TRUE  | 1 |
| chrII  | 1327002  | 1350143  | ReverseStr | K.KIFFHRN  | 0.999938 | 2 | FALSE | 2 |
| chrIV  | 15981543 | 15983938 | NovelExon  | R.HHNGPV   | 0.999529 | 1 | TRUE  | 1 |
| chrIII | 3869577  | 3887590  | ReverseStr | _.LGTGVDP  | 1        | 5 | FALSE | 3 |
| chrII  | 11027907 | 11030345 | ReverseStr | R.FANANAI  | 0.999946 | 2 | TRUE  | 2 |
| chrI   | 1211495  | 1254700  | NovelExon  | K.QEQTNHI  | 0.997454 | 1 | TRUE  | 1 |
| chrIV  | 12586462 | 12590404 | ReverseStr | _.REFFVQK  | 0.999952 | 2 | TRUE  | 2 |
| chrX   | 12106334 | 12108547 | ReverseStr | K.QNTKNW   | 1        | 2 | TRUE  | 2 |
| chrII  | 3792527  | 3793428  | ReverseStr | K.NQKTKN   | 0.999963 | 2 | FALSE | 2 |
| chrIV  | 15323861 | 15325157 | FrameShift | R.VKSEHQ   | 0.994085 | 1 | TRUE  | 1 |
| chrIII | 11961853 | 11971258 | FrameShift | R.KKECGDK  | 0.996268 | 1 | TRUE  | 1 |
| chrV   | 107402   | 118162   | ReverseStr | K.VQNHNL   | 0.999971 | 2 | TRUE  | 2 |
| chrI   | 4827073  | 4829797  | FrameShift | K.SMNSQK   | 0.994878 | 1 | TRUE  | 1 |
| chrIII | 2690170  | 2698809  | ReverseStr | K.TMKIPEI  | 0.999943 | 2 | TRUE  | 2 |
| chrIII | 7232864  | 7234140  | FrameShift | R.ARTSNIR  | 0.996927 | 1 | TRUE  | 1 |
| chrX   | 16049801 | 16054569 | NovelExon  | _.RDNKTTT  | 0.994081 | 1 | TRUE  | 1 |
| chrV   | 6497093  | 6498477  | GeneBound  | _.SFSKITEC | 1        | 3 | FALSE | 3 |
| chrV   | 16789308 | 16792750 | ReverseStr | R.TIICTSSD | 0.999998 | 2 | TRUE  | 2 |
| chrV   | 17774269 | 17777203 | ReverseStr | K.SKICFLKE | 0.999943 | 2 | FALSE | 2 |
| chrI   | 8669972  | 8673542  | ReverseStr | K.FGKCLKP  | 0.999974 | 2 | FALSE | 2 |
| chrIV  | 3664963  | 3668698  | ReverseStr | _.MGNGPV   | 0.999946 | 2 | FALSE | 2 |
| chrV   | 11253995 | 11255062 | ExonBound  | K.VELLNSCI | 0.999936 | 1 | TRUE  | 1 |
| chrIV  | 6164425  | 6171661  | ReverseStr | K.ISSAPQR  | 0.999948 | 2 | FALSE | 2 |
| chrIII | 9147312  | 9153812  | ReverseStr | K.VFMVDN   | 1        | 3 | TRUE  | 3 |
| chrII  | 2044629  | 2045590  | FrameShift | R.FYHRWS   | 0.995092 | 1 | TRUE  | 1 |
| chrV   | 7136258  | 7138398  | FrameShift | Q.KNTFITF  | 0.997862 | 1 | TRUE  | 1 |
| chrV   | 9918746  | 9919766  | FrameShift | I.THSFKNFS | 0.994483 | 1 | TRUE  | 1 |
| chrII  | 6110427  | 6113357  | ReverseStr | K.KNIFEAFE | 0.999982 | 2 | TRUE  | 2 |
| chrV   | 14412390 | 14415777 | NovelExon  | R.LHFCVTV  | 0.99492  | 1 | TRUE  | 1 |
| chrV   | 64564    | 83770    | NovelExon  | K.NLVREFS  | 0.998489 | 1 | TRUE  | 1 |
| chrV   | 7449334  | 7451130  | FrameShift | K.WLMENC   | 0.999442 | 1 | TRUE  | 1 |
| chrII  | 6684202  | 6688606  | FrameShift | R.FSWNISIK | 0.998038 | 1 | TRUE  | 1 |
| chrIII | 7313079  | 7315187  | ReverseStr | R.IADELDK  | 0.999978 | 3 | TRUE  | 2 |
| chrIII | 6171095  | 6172750  | ReverseStr | K.SHSGFHR  | 0.999981 | 2 | FALSE | 2 |
| chrX   | 4378005  | 4383341  | FrameShift | _.AIFEQML  | 0.999758 | 1 | TRUE  | 1 |
| chrV   | 16747537 | 16788393 | ReverseStr | K.KNTQNP   | 0.999989 | 2 | TRUE  | 2 |
| chrX   | 5575897  | 5590780  | NovelExon  | K.NEGEVIK  | 0.997194 | 1 | TRUE  | 1 |
| chrIII | 9176083  | 9177469  | NovelGene  | T.CQLEIYEM | 0.999955 | 2 | FALSE | 2 |
| chrI   | 4943631  | 4949335  | NovelExon  | K.NQFFGKK  | 0.9973   | 1 | TRUE  | 1 |
| chrX   | 4524159  | 4526508  | ExonBound  | K.MDSTLNE  | 0.999774 | 1 | TRUE  | 1 |
| chrIV  | 12412952 | 12417557 | ReverseStr | K.KMNREG   | 1        | 2 | TRUE  | 2 |
| chrV   | 11124285 | 11125040 | GeneBound  | L.KFLNVEE  | 0.999952 | 2 | FALSE | 2 |

|        |          |          |                        |          |   |       |   |
|--------|----------|----------|------------------------|----------|---|-------|---|
| chrIV  | 5811571  | 5814129  | ReverseStr: K.EGTTKFM  | 1        | 3 | TRUE  | 3 |
| chrIII | 10520704 | 10532604 | NovelExon R.SQVDDVI    | 0.996039 | 1 | TRUE  | 1 |
| chrI   | 286089   | 289139   | NovelExon K.FGHRLF     | 0.996275 | 1 | TRUE  | 1 |
| chrIV  | 6522863  | 6524557  | GeneBound K.ILMKITK    | 0.999988 | 2 | FALSE | 2 |
| chrI   | 6369967  | 6385715  | FrameShift R.VFWESGI   | 0.996922 | 1 | TRUE  | 1 |
| chrX   | 14654903 | 14662772 | FrameShift K.KDYSGGT   | 0.997965 | 1 | TRUE  | 1 |
| chrX   | 4273890  | 4274726  | GeneBound K.DFETKPS    | 0.999928 | 2 | FALSE | 2 |
| chrI   | 14341621 | 14343793 | Translated K.KKEEEVD   | 1        | 2 | TRUE  | 2 |
| chrIII | 12431538 | 12433764 | NovelExon K.SRYVPTK    | 0.995306 | 1 | TRUE  | 1 |
| chrIII | 706329   | 715818   | FrameShift K.QKEFLNV   | 0.995503 | 1 | TRUE  | 1 |
| chrX   | 2711207  | 2748107  | NovelExon Q.LKRMGG     | 0.996025 | 1 | TRUE  | 1 |
| chrV   | 16486957 | 16487553 | ReverseStr: L.RTTTGISI | 0.999952 | 2 | TRUE  | 2 |
| chrIII | 12273939 | 12282122 | NovelExon K.KIPVNFRI   | 0.994994 | 1 | TRUE  | 1 |
| chrIV  | 9644228  | 9647856  | ReverseStr: R.FQDIIFEI | 0.99997  | 2 | TRUE  | 2 |
| chrIII | 13430361 | 13433337 | FrameShift K.ELMRRSP   | 0.995355 | 1 | TRUE  | 1 |
| chrIII | 8405802  | 8409331  | GeneBound K.IACPLANI   | 0.999956 | 2 | FALSE | 2 |
| chrIII | 11326555 | 11343008 | ReverseStr: K.MLIFIGEM | 0.999979 | 2 | TRUE  | 2 |
| chrII  | 9994084  | 9995247  | GeneBound _ISVSFSLW    | 0.99998  | 2 | FALSE | 2 |
| chrII  | 9116555  | 9132148  | FrameShift K.LVMTVEC   | 0.996042 | 1 | TRUE  | 1 |
| chrIV  | 15025678 | 15037004 | NovelExon R.KSEEKPV    | 0.997907 | 1 | TRUE  | 1 |
| chrX   | 12318091 | 12320632 | ReverseStr: R.QSRCGSR  | 0.999995 | 2 | FALSE | 2 |
| chrI   | 5896643  | 5897408  | ExonBound K.EMTTGKS    | 0.999947 | 2 | TRUE  | 2 |
| chrI   | 7815243  | 7819588  | GeneBound K.MEILNQI    | 0.999956 | 2 | FALSE | 2 |
| chrII  | 13272564 | 13304159 | NovelExon R.RAAIFEN    | 0.999049 | 1 | TRUE  | 1 |
| chrV   | 11279740 | 11280390 | NovelGene K.NVTFSSA    | 0.999993 | 2 | FALSE | 2 |
| chrV   | 17805460 | 17808585 | NovelExon R.KNGIFQN    | 0.999925 | 2 | TRUE  | 2 |
| chrIV  | 14891432 | 14900621 | GeneBound K.VETNGKC    | 0.999938 | 2 | FALSE | 2 |
| chrII  | 9971005  | 9974987  | ReverseStr: R.TAITMIGI | 1        | 4 | FALSE | 2 |
| chrV   | 12816904 | 12819528 | FrameShift K.KRMKRKI   | 0.999993 | 2 | TRUE  | 2 |
| chrIII | 12813414 | 12816697 | GeneBound R.SFWPAILI   | 0.999976 | 2 | FALSE | 2 |
| chrI   | 81201    | 84959    | NovelExon K.NILIGKKY   | 0.997564 | 1 | TRUE  | 1 |
| chrIV  | 3032764  | 3050100  | FrameShift R.RRRRIFN   | 0.997904 | 1 | TRUE  | 1 |
| chrIV  | 7220066  | 7220715  | ExonBound S.AIPMPRG    | 0.995633 | 1 | TRUE  | 1 |
| chrX   | 7727850  | 7733257  | GeneBound R.IHQAHHF    | 0.999991 | 2 | FALSE | 2 |
| chrV   | 2192496  | 2196825  | FrameShift K.NRMLKW    | 0.996061 | 1 | TRUE  | 1 |
| chrI   | 12582064 | 12584701 | GeneBound _RLMQSAI     | 0.999946 | 2 | FALSE | 2 |
| chrIII | 1834504  | 1846751  | FrameShift K.KNFFFLT   | 0.996435 | 1 | TRUE  | 1 |
| chrV   | 11122743 | 11123851 | ReverseStr: R.MSREGLL  | 0.999952 | 2 | TRUE  | 2 |
| chrI   | 2928397  | 2929681  | GeneBound _PNSAAGF     | 1        | 3 | FALSE | 3 |
| chrII  | 6828076  | 6830413  | ReverseStr: R.LESFAAQ  | 1        | 3 | TRUE  | 3 |
| chrX   | 6087931  | 6088328  | ReverseStr: K.SQVFSTA  | 0.999997 | 2 | TRUE  | 2 |
| chrIV  | 7314361  | 7317152  | GeneBound K.SSWCFKV    | 0.999989 | 2 | FALSE | 2 |
| chrII  | 9333955  | 9338838  | NovelExon K.IIMDFNIM   | 0.99879  | 1 | TRUE  | 1 |
| chrIV  | 6019693  | 6034527  | NovelExon K.QFENREC    | 0.996642 | 1 | TRUE  | 1 |
| chrII  | 1425739  | 1437506  | ReverseStr: _FFGGKNL   | 0.999965 | 2 | TRUE  | 2 |
| chrI   | 4830136  | 4835872  | FrameShift V.VLIVMEV   | 0.994707 | 1 | TRUE  | 1 |
| chrI   | 6360846  | 6364062  | FrameShift K.VLVDSYFI  | 0.998473 | 1 | TRUE  | 1 |

|        |          |          |                         |          |   |       |   |
|--------|----------|----------|-------------------------|----------|---|-------|---|
| chrII  | 12557744 | 12560200 | ReverseStr: R.IFYHDFPS  | 1        | 3 | FALSE | 3 |
| chrX   | 4107452  | 4110388  | FrameShift R.VIIKCGEV   | 0.994114 | 1 | TRUE  | 1 |
| chrV   | 10123613 | 10124729 | GeneBounc_ .IHSQQFL     | 1        | 3 | FALSE | 3 |
| chrIV  | 13035931 | 13038966 | ReverseStr: K.IIVCGILKF | 1        | 6 | FALSE | 4 |
| chrI   | 11075751 | 11134660 | FrameShift K.RAKFPTP    | 0.999091 | 1 | TRUE  | 1 |
| chrI   | 4434836  | 4434932  | NovelGene K.MILIHKN     | 0.999951 | 2 | FALSE | 2 |
| chrX   | 301832   | 308296   | NovelExon K.NIDGDAL     | 0.99688  | 1 | TRUE  | 1 |
| chrIII | 4475887  | 4476856  | FrameShift K.NVLTNFH    | 0.999964 | 2 | TRUE  | 2 |
| chrV   | 3581395  | 3585042  | GeneBounc R.YGEYGAF     | 0.999987 | 2 | FALSE | 2 |
| chrIII | 9336794  | 9344363  | GeneBounc K.PCKNAGF     | 0.999989 | 2 | FALSE | 2 |
| chrIII | 2770617  | 2779045  | ExonBounc R.GGDGGA      | 1        | 2 | TRUE  | 2 |
| chrII  | 3237474  | 3238182  | FrameShift R.WRFSSKk    | 0.998615 | 1 | TRUE  | 1 |
| chrI   | 9170247  | 9177490  | NovelExon K.VVNLLAP     | 0.999692 | 1 | TRUE  | 1 |
| chrIV  | 3726126  | 3735491  | ReverseStr: K.KSLSENI   | 0.999954 | 2 | TRUE  | 2 |
| chrIII | 11871155 | 11878749 | ReverseStr: R.VTGFLIPk  | 0.999999 | 2 | FALSE | 2 |
| chrII  | 9897701  | 9900198  | ReverseStr: _ .KVGVS    | 0.999979 | 2 | TRUE  | 2 |
| chrII  | 5055608  | 5056182  | Translatedl Q.EPVEDGI   | 0.999999 | 2 | TRUE  | 2 |
| chrII  | 7132601  | 7137175  | FrameShift K.TICIVCPQ   | 0.995228 | 1 | TRUE  | 1 |
| chrV   | 11901974 | 11916604 | FrameShift K.DMKPSW     | 0.999968 | 2 | TRUE  | 2 |
| chrII  | 5799723  | 5801133  | FrameShift K.RMDLMK     | 0.996578 | 1 | TRUE  | 1 |
| chrII  | 6587544  | 6588647  | ReverseStr: _ .KDRKKS   | 1        | 6 | TRUE  | 4 |
| chrIV  | 13916425 | 13919399 | NovelGene S.ILQLPEIS/   | 0.999987 | 3 | FALSE | 2 |
| chrV   | 12133533 | 12137379 | FrameShift R.STTSKIDC   | 0.997135 | 1 | TRUE  | 1 |
| chrIV  | 9658036  | 9663924  | Translatedl K.QYTQFQ\   | 0.999968 | 2 | TRUE  | 2 |
| chrII  | 8457767  | 8464514  | GeneBounc R.YPVTNKP     | 0.999906 | 2 | FALSE | 2 |
| chrII  | 4590950  | 4601353  | NovelExon K.EWKSYKI     | 0.996887 | 1 | TRUE  | 1 |
| chrV   | 2207179  | 2210208  | NovelExon R.RPTISEFS    | 0.994001 | 1 | TRUE  | 1 |
| chrII  | 11977720 | 11979795 | GeneBounc _ .VLCEKKI    | 0.999997 | 2 | FALSE | 2 |
| chrV   | 1969540  | 1974514  | FrameShift K.NCPIFRN    | 0.996019 | 1 | TRUE  | 1 |
| chrIV  | 9980703  | 9982255  | ReverseStr: R.ISVTNTGI  | 1        | 3 | TRUE  | 3 |
| chrIV  | 2198997  | 2204545  | NovelExon K.NPQFLQk     | 0.997164 | 1 | TRUE  | 1 |
| chrX   | 14895076 | 14898372 | FrameShift R.QSISTAGI   | 0.996426 | 1 | TRUE  | 1 |
| chrII  | 1555264  | 1556318  | ReverseStr: R.NTIIHFKS  | 0.999958 | 2 | FALSE | 2 |
| chrIV  | 9401972  | 9412850  | FrameShift R.SKCHQCF    | 0.994337 | 1 | TRUE  | 1 |
| chrI   | 9138400  | 9145625  | ReverseStr: R.TKNTHRA   | 1        | 3 | TRUE  | 3 |
| chrIV  | 12362438 | 12370602 | GeneBounc R.NMLIWQ      | 1        | 3 | FALSE | 3 |
| chrV   | 6121270  | 6202609  | ReverseStr: _ .VFGFEKN  | 0.999997 | 2 | TRUE  | 2 |
| chrV   | 18318567 | 18319748 | NovelExon R.HLFMCM      | 0.99804  | 1 | TRUE  | 1 |
| chrV   | 14612423 | 14613694 | ExonBounc K.SRNFKIQI    | 0.998188 | 1 | TRUE  | 1 |
| chrIII | 5830106  | 5833701  | ReverseStr: P.ECFLIELIE | 0.999928 | 2 | TRUE  | 2 |
| chrII  | 1112196  | 1114233  | ReverseStr: K.SEHLFLE   | 1        | 4 | TRUE  | 4 |
| chrV   | 1460369  | 1461614  | ExonBounc K.IFQIPSAA    | 0.994702 | 1 | TRUE  | 1 |
| chrIV  | 17104180 | 17110946 | FrameShift S.LYFPLKIN   | 0.994617 | 1 | TRUE  | 1 |
| chrIV  | 1917977  | 1921640  | FrameShift K.KSCLSKCF   | 0.994477 | 1 | TRUE  | 1 |
| chrII  | 5649730  | 5654404  | ExonBounc R.VSVPADf     | 0.995039 | 1 | TRUE  | 1 |
| chrIV  | 8261131  | 8266441  | NovelExon _ .SYLPIAEV   | 0.994357 | 1 | TRUE  | 1 |
| chrII  | 5778248  | 5779410  | NovelGene K.LTHLKNT:    | 0.999971 | 2 | FALSE | 2 |

|        |          |          |             |             |          |   |       |   |
|--------|----------|----------|-------------|-------------|----------|---|-------|---|
| chrII  | 8204290  | 8207522  | FrameShift  | R.KMKIMEI   | 0.995707 | 1 | TRUE  | 1 |
| chrV   | 10011847 | 10023212 | NovelSplice | K.ASDAWD    | 0.999577 | 1 | TRUE  | 1 |
| chrX   | 5791668  | 5797145  | NovelExon   | K.FSRITSSA  | 0.997806 | 1 | TRUE  | 1 |
| chrIII | 13107506 | 13118800 | NovelExon   | K.KSEKSKKI  | 0.99654  | 1 | TRUE  | 1 |
| chrII  | 8608825  | 8610059  | ReverseStr: | R.TISSDNG'  | 1        | 3 | TRUE  | 3 |
| chrI   | 2219473  | 2222315  | ReverseStr: | R.RRDHLGF   | 0.999991 | 2 | TRUE  | 2 |
| chrX   | 11599006 | 11600538 | NovelGene   | K.KEMKAE\   | 0.999949 | 2 | FALSE | 2 |
| chrV   | 20667203 | 20678509 | FrameShift  | K.KNEKXXX   | 0.994527 | 1 | TRUE  | 1 |
| chrIV  | 4807413  | 4809968  | NovelExon   | R.HHSFCDII  | 0.996062 | 1 | TRUE  | 1 |
| chrII  | 9267276  | 9268243  | FrameShift  | K.KTGGSSG   | 0.99999  | 2 | TRUE  | 2 |
| chrV   | 8269234  | 8272038  | ReverseStr: | _.DEIESAV\  | 0.999977 | 2 | TRUE  | 2 |
| chrV   | 19026434 | 19031561 | NovelExon   | R.YISRKIDK  | 0.994145 | 1 | TRUE  | 1 |
| chrV   | 6121270  | 6202609  | FrameShift  | R.IRSEKPTC  | 0.994643 | 1 | TRUE  | 1 |
| chrI   | 4934038  | 4940510  | ExonBounc   | R.KENLFFCI  | 0.99917  | 1 | TRUE  | 1 |
| chrIV  | 4920347  | 4932209  | ReverseStr: | K.PKFRNFQ   | 0.999985 | 2 | TRUE  | 2 |
| chrX   | 3684211  | 3689194  | FrameShift  | _.IFRLINLK\ | 0.996834 | 1 | TRUE  | 1 |
| chrI   | 10846767 | 10850094 | NovelExon   | K.LWDNNE    | 0.9963   | 1 | TRUE  | 1 |
| chrX   | 16973154 | 16976057 | ReverseStr: | _.QLEWRS\   | 0.999967 | 2 | FALSE | 2 |
| chrIV  | 12823797 | 12825251 | NovelExon   | K.NYSTPSN   | 0.99476  | 1 | TRUE  | 1 |
| chrX   | 2180891  | 2185847  | NovelExon   | P.NRNISVT   | 0.994768 | 1 | TRUE  | 1 |
| chrV   | 13791003 | 13796223 | ReverseStr: | A.GRDGNIF   | 0.999985 | 2 | TRUE  | 2 |
| chrX   | 4960522  | 4964385  | NovelSplice | V.DNGSGM    | 0.994757 | 1 | TRUE  | 1 |
| chrX   | 7823603  | 7825698  | FrameShift  | _.TLLEALDS  | 0.998068 | 1 | TRUE  | 1 |
| chrII  | 13504012 | 13506835 | FrameShift  | P.PKKSIVPF  | 0.997589 | 1 | TRUE  | 1 |
| chrI   | 6851371  | 6854135  | FrameShift  | R.EKHFWRI   | 0.995334 | 1 | TRUE  | 1 |
| chrX   | 7823603  | 7825709  | NovelExon   | K.NMITGTS   | 0.998989 | 1 | TRUE  | 1 |
| chrIII | 11576450 | 11578846 | ReverseStr: | K.FMYSVGI   | 0.999959 | 2 | FALSE | 2 |
| chrX   | 6463375  | 6465396  | NovelExon   | K.HKDYTQC   | 0.998965 | 1 | TRUE  | 1 |
| chrIII | 11252374 | 11256506 | NovelExon   | K.ALQMQE    | 0.995848 | 1 | TRUE  | 1 |
| chrIV  | 6307728  | 6315708  | NovelExon   | K.WMFSGP    | 0.995863 | 1 | TRUE  | 1 |
| chrV   | 10125027 | 10127512 | GeneBounc   | C.GGFITFFI  | 1        | 2 | FALSE | 2 |
| chrV   | 9629919  | 9630987  | GeneBounc   | K.NWCWW     | 0.999974 | 2 | FALSE | 2 |
| chrII  | 2631471  | 2633059  | ReverseStr: | R.IISTKNCP  | 0.999967 | 2 | FALSE | 2 |
| chrX   | 14581585 | 14584299 | FrameShift  | K.MTRMFM    | 0.995869 | 1 | TRUE  | 1 |
| chrI   | 4597891  | 4602667  | ReverseStr: | K.GIFCRVEI  | 0.999953 | 2 | FALSE | 2 |
| chrIII | 6366528  | 6367769  | FrameShift  | R.FFYNLYH'  | 0.994788 | 1 | TRUE  | 1 |
| chrIV  | 8261131  | 8266441  | NovelExon   | K.HQLVSAF   | 1        | 1 | TRUE  | 1 |
| chrIV  | 3282882  | 3289334  | GeneBounc   | R.MPVFGA    | 1        | 3 | FALSE | 3 |
| chrI   | 2707601  | 2717551  | GeneBounc   | G.TEVFGKS   | 0.999994 | 2 | FALSE | 2 |
| chrI   | 4716060  | 4717442  | FrameShift  | R.TEEEMGI   | 0.995796 | 1 | TRUE  | 1 |
| chrIV  | 8854524  | 8862474  | NovelExon   | R.QRLLKQ    | 0.9977   | 1 | TRUE  | 1 |
| chrV   | 5940007  | 5943346  | NovelExon   | K.MSQNFV    | 0.997579 | 1 | TRUE  | 1 |
| chrI   | 9135757  | 9138349  | ReverseStr: | R.FPMTVET   | 0.999962 | 2 | TRUE  | 2 |
| chrI   | 2875397  | 2876326  | GeneBounc   | I.DRIMRMI   | 0.999951 | 2 | FALSE | 2 |
| chrIII | 8684727  | 8686400  | FrameShift  | K.YLTKVSSI  | 0.998664 | 1 | TRUE  | 1 |
| chrIII | 7981104  | 7986272  | FrameShift  | R.WWWW'     | 0.997526 | 1 | TRUE  | 1 |
| chrI   | 5741868  | 5743576  | ReverseStr: | R.TFLHRWF   | 1        | 3 | FALSE | 3 |

|        |          |          |                         |          |   |       |   |
|--------|----------|----------|-------------------------|----------|---|-------|---|
| chrV   | 12455709 | 12462797 | ReverseStr: R.ERERERE   | 0.999975 | 2 | FALSE | 2 |
| chrX   | 12589601 | 12591707 | NovelGene K.IWKMESI     | 0.999939 | 2 | FALSE | 2 |
| chrIV  | 1067481  | 1068843  | NovelGene _.GGGGGG      | 1        | 3 | FALSE | 3 |
| chrV   | 6692230  | 6694706  | ReverseStr: _.FQNEIVIII | 0.999944 | 2 | TRUE  | 2 |
| chrX   | 3112073  | 3113372  | ReverseStr: K.RSQLSML   | 0.99999  | 2 | FALSE | 2 |
| chrX   | 15648195 | 15650837 | NovelExon K.TTVEAPFI    | 0.99631  | 1 | TRUE  | 1 |
| chrI   | 9163941  | 9166821  | FrameShift _.GHVFEEES   | 0.999994 | 2 | TRUE  | 2 |
| chrV   | 3743563  | 3749420  | NovelExon K.CSKNSQII    | 0.998268 | 1 | TRUE  | 1 |
| chrI   | 5008773  | 5013374  | ReverseStr: K.LNTVCDV   | 0.999961 | 2 | TRUE  | 2 |
| chrI   | 10879759 | 10894230 | FrameShift R.NGRIYGS    | 0.995803 | 1 | TRUE  | 1 |
| chrIII | 4709213  | 4712492  | GeneBound R.STCYASN     | 0.999997 | 3 | FALSE | 2 |
| chrI   | 7699539  | 7700958  | GeneBound R.AEEKTTYI    | 0.999904 | 2 | FALSE | 2 |
| chrII  | 7192409  | 7194774  | ReverseStr: R.IVESGTFK  | 1        | 3 | TRUE  | 3 |
| chrV   | 18790971 | 18794752 | FrameShift R.IFPVSSSV   | 0.99574  | 1 | TRUE  | 1 |
| chrIII | 12166    | 14801    | ReverseStr: K.IIAGSLEK  | 0.999952 | 2 | TRUE  | 2 |
| chrIV  | 15981543 | 15983938 | ReverseStr: R.DRISVRD   | 1        | 3 | TRUE  | 3 |
| chrV   | 1075201  | 1079771  | ReverseStr: K.WTMVISI   | 1        | 3 | FALSE | 3 |
| chrII  | 9680739  | 9682999  | ReverseStr: K.VDVCRVK   | 0.999965 | 2 | TRUE  | 2 |
| chrIV  | 17480360 | 17483294 | ReverseStr: K.VIENFGS   | 1        | 3 | TRUE  | 3 |
| chrV   | 19014608 | 19020033 | FrameShift R.FQKNTIPI   | 0.997257 | 1 | TRUE  | 1 |
| chrI   | 5472324  | 5479441  | NovelExon K.ISSAPMV     | 0.998553 | 1 | TRUE  | 1 |
| chrV   | 4647647  | 4648229  | ReverseStr: R.RVRMWF    | 1        | 6 | TRUE  | 2 |
| chrV   | 10183927 | 10184420 | ReverseStr: P.CEDLQNT   | 0.999992 | 4 | TRUE  | 2 |
| chrIII | 9996122  | 9997831  | GeneBound R.PSLPFALC    | 0.999942 | 2 | FALSE | 2 |
| chrV   | 11501354 | 11503109 | ReverseStr: R.IPTNLHEI  | 0.999969 | 2 | TRUE  | 2 |
| chrI   | 10567883 | 10569008 | GeneBound K.EGEIVLAC    | 0.999997 | 3 | FALSE | 2 |
| chrII  | 14484391 | 14484504 | NovelGene K.VFICIMAN    | 0.999922 | 2 | FALSE | 2 |
| chrIII | 2834655  | 2836253  | FrameShift R.HFWKLEI    | 0.996835 | 1 | TRUE  | 1 |
| chrIV  | 8226327  | 8236588  | ReverseStr: K.NVHYRHI   | 0.999994 | 3 | TRUE  | 2 |
| chrX   | 8778795  | 8784388  | FrameShift _.EEKRVLT    | 0.997065 | 1 | TRUE  | 1 |
| chrIV  | 8261131  | 8266449  | FrameShift K.YEGAEEKS   | 0.999996 | 2 | TRUE  | 2 |
| chrI   | 12853068 | 12858262 | ReverseStr: V.LEVEVLG   | 0.999992 | 2 | FALSE | 2 |
| chrX   | 9216817  | 9232012  | NovelExon R.EVIKHFN     | 0.998239 | 1 | TRUE  | 1 |
| chrX   | 211441   | 211676   | GeneBound K.KSDKYSN     | 0.999984 | 2 | FALSE | 2 |
| chrII  | 5830848  | 5831993  | ExonBound R.NEMNIEM     | 0.995038 | 1 | TRUE  | 1 |
| chrI   | 1663402  | 1666770  | NovelExon R.FMARRG      | 0.995358 | 1 | TRUE  | 1 |
| chrIV  | 4884288  | 4886889  | NovelExon R.DLNPRVC     | 0.999525 | 1 | TRUE  | 1 |
| chrV   | 18069992 | 18077432 | ReverseStr: R.KYEEMSC   | 0.999913 | 2 | TRUE  | 2 |
| chrII  | 3731976  | 3733206  | FrameShift K.MPGRLPC    | 0.994629 | 1 | TRUE  | 1 |
| chrII  | 13414956 | 13424382 | NovelExon R.FFQNSKF     | 0.997999 | 1 | TRUE  | 1 |
| chrIV  | 6503017  | 6504655  | NovelGene R.EEDLENIL    | 0.999944 | 2 | FALSE | 2 |
| chrII  | 2335938  | 2337699  | ReverseStr: K.KFIITTFEF | 0.999963 | 2 | TRUE  | 2 |
| chrIII | 5626444  | 5632276  | NovelExon R.ESLANIEF    | 0.996723 | 1 | TRUE  | 1 |
| chrII  | 9085077  | 9085405  | NovelGene K.KSSRAQV     | 0.999963 | 2 | FALSE | 2 |
| chrIII | 6067840  | 6068776  | FrameShift R.FPKSDRFI   | 0.997882 | 1 | TRUE  | 1 |
| chrV   | 14949760 | 14952775 | ExonBound R.QKLENIS     | 1        | 1 | TRUE  | 1 |
| chrIV  | 12468647 | 12474866 | FrameShift R.GIFDCNP    | 0.998108 | 1 | TRUE  | 1 |

|        |          |          |             |             |          |   |       |   |
|--------|----------|----------|-------------|-------------|----------|---|-------|---|
| chrII  | 3790753  | 3791398  | GeneBounc   | R.FMIAML1   | 0.999963 | 2 | FALSE | 2 |
| chrIII | 6749083  | 6794698  | ExonBounc   | S.EVPLSVRI  | 0.999291 | 1 | TRUE  | 1 |
| chrI   | 482482   | 487993   | NovelExon   | K.YFFEFSRF  | 0.999766 | 1 | TRUE  | 1 |
| chrI   | 14005613 | 14008459 | GeneBounc   | R.LTAIDSA/  | 1        | 6 | FALSE | 6 |
| chrIV  | 58903    | 67857    | NovelGene   | R.LSLSLSLSI | 1        | 6 | FALSE | 6 |
| chrIII | 11326555 | 11343008 | ReverseStr: | R.YKLFLVEC  | 0.999973 | 2 | TRUE  | 2 |
| chrV   | 3704982  | 3712845  | GeneBounc   | K.KLKSMKN   | 0.999992 | 2 | FALSE | 2 |
| chrV   | 15080124 | 15082462 | NovelExon   | K.NKSEKNM   | 0.997004 | 1 | TRUE  | 1 |
| chrV   | 6221938  | 6222522  | NovelGene   | R.VEDVKEN   | 0.999976 | 2 | FALSE | 2 |
| chrI   | 6838353  | 6843342  | GeneBounc   | _.NTFAMA    | 1        | 3 | FALSE | 3 |
| chrIV  | 6913523  | 6917079  | NovelSplice | K.GTPISDIN  | 0.99897  | 1 | TRUE  | 1 |
| chrIII | 828583   | 832270   | NovelExon   | R.AFFFDYD   | 0.999382 | 1 | TRUE  | 1 |
| chrIII | 7974540  | 7977260  | GeneBounc   | E.DTGDFEC   | 1        | 2 | FALSE | 2 |
| chrI   | 12091562 | 12094471 | NovelExon   | K.CAKNVQI   | 0.997042 | 1 | TRUE  | 1 |
| chrIV  | 7153650  | 7154186  | GeneBounc   | R.QLFGFSD   | 0.999972 | 2 | FALSE | 2 |
| chrIII | 12367374 | 12368949 | ReverseStr: | L.IKIFFFQ   | 1        | 4 | TRUE  | 3 |
| chrIII | 5249036  | 5254152  | ReverseStr: | K.FINFSNN   | 0.999972 | 2 | TRUE  | 2 |
| chrI   | 13952149 | 13953182 | FrameShift  | _.HVQEVAI   | 0.99796  | 3 | TRUE  | 1 |
| chrI   | 1491342  | 1514411  | NovelExon   | K.IEDFLGNI  | 0.996584 | 1 | TRUE  | 1 |
| chrI   | 13011451 | 13023561 | NovelExon   | K.NFPENSN   | 0.997039 | 1 | TRUE  | 1 |
| chrIV  | 14165764 | 14168462 | FrameShift  | R.YISSSQSS  | 0.997228 | 1 | TRUE  | 1 |
| chrIV  | 11103234 | 11104082 | FrameShift  | K.MRKMRP    | 0.999992 | 2 | TRUE  | 2 |
| chrI   | 11912782 | 11917710 | NovelExon   | K.IDENSEIT  | 0.994057 | 1 | TRUE  | 1 |
| chrIII | 5408047  | 5413138  | FrameShift  | R.IEVEGTGI  | 0.996362 | 1 | TRUE  | 1 |
| chrIII | 4693960  | 4695234  | GeneBounc   | K.FFKDIMV   | 0.999968 | 2 | FALSE | 2 |
| chrV   | 3695959  | 3701755  | NovelExon   | K.KLKSMKN   | 0.999159 | 1 | TRUE  | 1 |
| chrI   | 3233393  | 3255567  | NovelExon   | _.KFPEIFW   | 0.994857 | 1 | TRUE  | 1 |
| chrX   | 1211754  | 1220024  | FrameShift  | R.ICIKAQRS  | 0.99431  | 1 | TRUE  | 1 |
| chrIV  | 14078662 | 14083534 | NovelExon   | R.FCVKNCE   | 0.995154 | 1 | TRUE  | 1 |
| chrIV  | 3032764  | 3050100  | ReverseStr: | K.NYQSNKS   | 1        | 3 | FALSE | 3 |
| chrV   | 10572897 | 10575728 | Translated  | _.GYYWEW    | 0.99998  | 2 | TRUE  | 2 |
| chrIV  | 2114626  | 2115625  | ReverseStr: | K.INNSGKS   | 0.999992 | 2 | FALSE | 2 |
| chrV   | 8221468  | 8223567  | FrameShift  | Q.GKNHAG    | 0.994473 | 1 | TRUE  | 1 |
| chrV   | 19049429 | 19050726 | ReverseStr: | R.GETHRG    | 1        | 7 | TRUE  | 5 |
| chrIV  | 12605673 | 12614700 | ReverseStr: | K.SLGLFDIP  | 0.999924 | 2 | TRUE  | 2 |
| chrIV  | 8261131  | 8266441  | NovelExon   | _.VELPFRLF  | 1        | 1 | TRUE  | 1 |
| chrIV  | 786232   | 794275   | ReverseStr: | L.QMTMAC    | 0.999984 | 2 | FALSE | 2 |
| chrIII | 2384937  | 2386569  | ReverseStr: | K.FEKKSFP   | 0.999924 | 2 | TRUE  | 2 |
| chrIV  | 14276440 | 14285499 | FrameShift  | R.DQFMW     | 0.99698  | 1 | TRUE  | 1 |
| chrX   | 8907997  | 8910775  | ExonBounc   | _.MFQKHK    | 0.995731 | 1 | TRUE  | 1 |
| chrI   | 8384974  | 8386972  | GeneBounc   | K.KDQSIRM   | 0.999961 | 2 | FALSE | 2 |
| chrI   | 2924934  | 2928140  | FrameShift  | _.PNSAAGF   | 0.999493 | 1 | TRUE  | 1 |
| chrIV  | 7681414  | 7696911  | FrameShift  | K.SSSACLNI  | 0.995447 | 1 | TRUE  | 1 |
| chrI   | 14867913 | 14871354 | NovelExon   | K.GLSHFELI  | 0.995289 | 1 | TRUE  | 1 |
| chrI   | 8024875  | 8026520  | ReverseStr: | K.WIGGPCF   | 0.999981 | 2 | FALSE | 2 |
| chrIV  | 26982    | 32380    | NovelExon   | R.SIILSMPK  | 0.996734 | 1 | TRUE  | 1 |
| chrX   | 2382684  | 2384757  | FrameShift  | R.ESINSIISP | 0.9977   | 1 | TRUE  | 1 |

|        |          |          |                         |          |   |       |   |
|--------|----------|----------|-------------------------|----------|---|-------|---|
| chrIV  | 14862441 | 14869969 | ReverseStr: K.RIAQVSKI  | 0.999977 | 2 | TRUE  | 2 |
| chrIV  | 1873310  | 1880591  | ReverseStr: R.KFGEKLG   | 1        | 3 | FALSE | 3 |
| chrX   | 7823603  | 7825709  | NovelExon _ .RKRFGKT    | 0.998549 | 1 | TRUE  | 1 |
| chrX   | 377391   | 380569   | NovelExon R.TTYGNRR     | 0.99422  | 1 | TRUE  | 1 |
| chrIV  | 9803006  | 9806101  | FrameShift R.DECYASK    | 0.999193 | 1 | TRUE  | 1 |
| chrI   | 8666589  | 8669782  | FrameShift K.FGKCLKP    | 0.996953 | 1 | TRUE  | 1 |
| chrII  | 9837030  | 9838243  | FrameShift V.LLSLKYEY   | 0.999998 | 2 | TRUE  | 2 |
| chrII  | 12251672 | 12256563 | ReverseStr: R.NFQRISN   | 0.999918 | 2 | FALSE | 2 |
| chrII  | 11918276 | 11933161 | NovelExon K.KKCETTS     | 0.999996 | 2 | TRUE  | 2 |
| chrV   | 241327   | 242617   | NovelExon R.ELSLNTFL    | 0.99722  | 1 | TRUE  | 1 |
| chrII  | 258463   | 261063   | GeneBound K.ISGKSANI    | 1        | 4 | FALSE | 3 |
| chrX   | 9137870  | 9145538  | ExonBound K.MSLSGQI     | 0.996501 | 1 | TRUE  | 1 |
| chrIII | 7023585  | 7029139  | ReverseStr: R.MKTTTEI   | 1        | 4 | TRUE  | 3 |
| chrV   | 9586160  | 9590499  | ReverseStr: K.NLQSIRLF  | 1        | 3 | TRUE  | 3 |
| chrIV  | 9343341  | 9355968  | FrameShift K.YFRKFLP    | 0.995807 | 1 | TRUE  | 1 |
| chrIV  | 9359424  | 9366489  | ReverseStr: K.CRELPTF   | 0.999953 | 2 | TRUE  | 2 |
| chrII  | 3525153  | 3528519  | ExonBound K.MLKFKNI     | 0.997297 | 1 | TRUE  | 1 |
| chrV   | 8130597  | 8133311  | ExonBound R.MFGGGG      | 1        | 1 | TRUE  | 1 |
| chrIII | 4843405  | 4844374  | ReverseStr: K.LKKWEN    | 0.999986 | 2 | TRUE  | 2 |
| chrIV  | 3355054  | 3357548  | NovelExon K.KNSNSAV     | 0.997579 | 1 | TRUE  | 1 |
| chrI   | 8377596  | 8392747  | NovelExon _ .FCIKCSPL   | 0.997113 | 1 | TRUE  | 1 |
| chrIII | 8792766  | 8794234  | FrameShift L.LSKTLIFFF  | 0.996892 | 1 | TRUE  | 1 |
| chrX   | 16963798 | 16972747 | NovelExon K.TAAGGTC     | 0.996711 | 1 | TRUE  | 1 |
| chrIV  | 7314361  | 7317152  | ReverseStr: _ .YQALVKG  | 0.999985 | 2 | FALSE | 2 |
| chrIV  | 13934420 | 13943703 | FrameShift R.LMSADVI    | 0.998688 | 1 | TRUE  | 1 |
| chrIII | 5102953  | 5106954  | GeneBound _ .EFQELTEI   | 1        | 3 | FALSE | 3 |
| chrV   | 15076917 | 15080125 | ReverseStr: R.NHQKNQ    | 1        | 3 | TRUE  | 3 |
| chrI   | 7057199  | 7059348  | FrameShift _ .MFTKSAT   | 0.994388 | 1 | TRUE  | 1 |
| chrV   | 18386224 | 18389118 | ReverseStr: _ .ITFSTNFT | 0.999953 | 2 | TRUE  | 2 |
| chrII  | 14063375 | 14065829 | GeneBound R.SPWSAQI     | 1        | 3 | FALSE | 3 |
| chrIII | 10314502 | 10318070 | NovelExon R.ICKSNIKE    | 0.995329 | 1 | TRUE  | 1 |
| chrX   | 4265859  | 4270462  | FrameShift R.RTHQHHL    | 0.997663 | 1 | TRUE  | 1 |
| chrV   | 186306   | 200687   | NovelExon K.KFRKKTEI    | 1        | 1 | TRUE  | 1 |
| chrIV  | 13218169 | 13220379 | NovelGene R.LKNPGSY     | 0.999974 | 2 | FALSE | 2 |
| chrIII | 11117136 | 11119100 | ReverseStr: R.RFQKSQA   | 1        | 3 | TRUE  | 3 |
| chrV   | 5779310  | 5780905  | ExonBound K.VETLDLM     | 0.997583 | 1 | TRUE  | 1 |
| chrV   | 85257    | 88638    | NovelGene K.FGCLLQG     | 1        | 3 | FALSE | 3 |
| chrI   | 1156582  | 1157465  | FrameShift K.NQPIHVF    | 1        | 3 | TRUE  | 3 |
| chrV   | 12032237 | 12040854 | ReverseStr: _ .YSSVVAYI | 1        | 2 | TRUE  | 2 |
| chrV   | 12611311 | 12628720 | FrameShift R.RMFPTDI    | 0.996535 | 1 | TRUE  | 1 |
| chrIII | 688734   | 715818   | NovelExon K.LSKNTNF     | 0.999157 | 1 | TRUE  | 1 |
| chrIV  | 3263848  | 3265369  | FrameShift R.TEFWRLL    | 0.997938 | 1 | TRUE  | 1 |
| chrIV  | 112410   | 114957   | NovelExon R.IDNLQRR     | 0.994057 | 1 | TRUE  | 1 |
| chrIII | 10505382 | 10505998 | FrameShift R.QSKSTKG    | 0.999647 | 1 | TRUE  | 1 |
| chrI   | 1601842  | 1606883  | ReverseStr: R.FEPPFVPI  | 0.999972 | 2 | FALSE | 2 |
| chrIII | 11235478 | 11236771 | ReverseStr: R.HNPIDFLI  | 0.999988 | 2 | TRUE  | 2 |
| chrIV  | 16174396 | 16174480 | NovelGene R.CVRMTEI     | 0.999974 | 2 | FALSE | 2 |



|        |          |          |                        |          |   |       |   |
|--------|----------|----------|------------------------|----------|---|-------|---|
| chrX   | 16299832 | 16304050 | ReverseStr: R.FDKNHAI  | 1        | 4 | TRUE  | 4 |
| chrX   | 2918795  | 2923974  | ReverseStr: K.FKTMTSY  | 1        | 3 | FALSE | 3 |
| chrIII | 12225537 | 12226141 | ReverseStr: R.CNLEKLN  | 0.999934 | 2 | FALSE | 2 |
| chrI   | 1634742  | 1644657  | ReverseStr: K.KWQKW/   | 0.999952 | 2 | TRUE  | 2 |
| chrIII | 4012316  | 4015742  | GeneBounc_ .AILSPLGC   | 1        | 5 | FALSE | 5 |
| chrIII | 13344836 | 13346765 | FrameShift R.RYALGFS   | 0.996199 | 1 | TRUE  | 1 |
| chrIII | 2805423  | 2810994  | FrameShift K.DQDRLG\   | 0.994387 | 1 | TRUE  | 1 |
| chrI   | 12537981 | 12538945 | ReverseStr: R.FSKLGGP  | 0.99997  | 2 | TRUE  | 2 |
| chrII  | 8607947  | 8608893  | GeneBounc R.NYVQPNI    | 1        | 2 | FALSE | 2 |
| chrIII | 9781166  | 9781971  | FrameShift R.SRICYWY   | 0.998803 | 1 | TRUE  | 1 |
| chrIII | 5859569  | 5861860  | ExonBounc K.SDGVDVS    | 0.999812 | 1 | TRUE  | 1 |
| chrX   | 4610899  | 4620396  | NovelExon K.QHVLVDI    | 0.994586 | 1 | TRUE  | 1 |
| chrV   | 1448031  | 1448794  | ReverseStr: K.INLFCCLK | 0.99998  | 2 | TRUE  | 2 |
| chrII  | 14155693 | 14165954 | GeneBounc K.FKIFAIKF   | 0.999999 | 5 | FALSE | 2 |
| chrIII | 13580749 | 13583517 | FrameShift R.RRMLERF   | 0.995225 | 1 | TRUE  | 1 |
| chrX   | 3844766  | 3857778  | NovelExon R.RKDAGH     | 0.995009 | 1 | TRUE  | 1 |
| chrV   | 13862791 | 13864096 | ReverseStr: K.SETSKKTS | 0.999972 | 2 | FALSE | 2 |
| chrX   | 7733288  | 7736219  | ReverseStr: K.MQTLKGI  | 1        | 5 | TRUE  | 5 |
| chrII  | 7549287  | 7551929  | FrameShift K.KMDQIM    | 0.997442 | 1 | TRUE  | 1 |
| chrIII | 5993181  | 6006318  | GeneBounc_ .KNTRGEA    | 0.999969 | 2 | FALSE | 2 |
| chrII  | 6684202  | 6688606  | NovelExon R.LLELAPT    | 1        | 1 | TRUE  | 1 |
| chrV   | 4240938  | 4242517  | ReverseStr: K.NDGVVK   | 1        | 2 | FALSE | 2 |
| chrIV  | 4862177  | 4864133  | ReverseStr: K.QKMLKVI  | 0.999994 | 2 | FALSE | 2 |
| chrIII | 2866466  | 2866992  | NovelGene L.VEKSVFP    | 0.999939 | 2 | FALSE | 2 |
| chrIV  | 3989096  | 3991515  | FrameShift _ .KAAKHGI  | 0.995589 | 1 | TRUE  | 1 |
| chrI   | 12741595 | 12748719 | ReverseStr: K.NVQKMP   | 0.999985 | 2 | TRUE  | 2 |
| chrX   | 12300066 | 12301214 | ReverseStr: R.FQTPQPL  | 0.999923 | 2 | FALSE | 2 |
| chrIV  | 11119323 | 11123133 | FrameShift R.SSSMDYL   | 0.994656 | 1 | TRUE  | 1 |
| chrI   | 4790644  | 4792502  | ReverseStr: R.ECIQAFD  | 1        | 5 | TRUE  | 3 |
| chrV   | 9907612  | 9910485  | FrameShift R.WWNWV     | 0.997486 | 1 | TRUE  | 1 |
| chrII  | 13734793 | 13735213 | NovelGene R.TQRMIEF    | 1        | 3 | FALSE | 3 |
| chrIII | 3405565  | 3411202  | GeneBounc E.ADRFEKM    | 1        | 3 | FALSE | 3 |
| chrII  | 4892264  | 4892723  | FrameShift R.MVLLSNS   | 0.998839 | 1 | TRUE  | 1 |
| chrIII | 2487759  | 2494163  | NovelExon N.FSYLVKI    | 0.998866 | 1 | TRUE  | 1 |
| chrIII | 6737281  | 6737692  | GeneBounc R.DIDAYKR    | 0.999965 | 2 | FALSE | 2 |
| chrII  | 5640043  | 5647024  | FrameShift R.KRNAISN   | 0.998992 | 1 | TRUE  | 1 |
| chrIII | 11612507 | 11615694 | NovelExon K.KSIIVTKI   | 0.994214 | 1 | TRUE  | 1 |
| chrX   | 11324377 | 11326837 | NovelExon R.QLLNQIR    | 0.994483 | 1 | TRUE  | 1 |
| chrX   | 13381810 | 13381882 | NovelGene R.SKITKRSL   | 0.999992 | 2 | FALSE | 2 |
| chrIII | 11990067 | 11999492 | ExonBounc R.SEQQSM     | 1        | 1 | TRUE  | 1 |
| chrX   | 13552271 | 13556095 | ReverseStr: K.MAGILW   | 0.999975 | 2 | FALSE | 2 |
| chrX   | 12503893 | 12513979 | FrameShift I.NRFNISLK  | 0.99552  | 1 | TRUE  | 1 |
| chrII  | 480465   | 484393   | ExonBounc K.KNFQDR     | 0.999009 | 1 | TRUE  | 1 |
| chrX   | 12712582 | 12727581 | NovelExon K.MICNVIG    | 0.995352 | 1 | TRUE  | 1 |
| chrIII | 8326510  | 8330878  | ReverseStr: T.MFYVNAI  | 1        | 4 | TRUE  | 3 |
| chrIII | 2650856  | 2651963  | NovelGene K.YPVLSIAL   | 0.99998  | 2 | FALSE | 2 |
| chrIV  | 14725836 | 14728254 | NovelGene K.NNFELLO    | 0.999998 | 2 | FALSE | 2 |

|        |          |          |             |             |          |   |       |   |
|--------|----------|----------|-------------|-------------|----------|---|-------|---|
| chrV   | 2192496  | 2196825  | GeneBounc   | C.VPNCGFK   | 1        | 5 | FALSE | 5 |
| chrV   | 19614528 | 19622436 | FrameShift  | R.HHQRRR    | 0.995069 | 1 | TRUE  | 1 |
| chrIII | 7495639  | 7497768  | ReverseStr: | _.MPPMRP    | 0.999993 | 2 | TRUE  | 2 |
| chrX   | 16308864 | 16314881 | FrameShift  | K.MLLAWK    | 0.996585 | 1 | TRUE  | 1 |
| chrV   | 107402   | 118162   | FrameShift  | S.NSSTAPT   | 0.99435  | 1 | TRUE  | 1 |
| chrV   | 17322590 | 17324502 | ReverseStr: | _.ENGTAGE   | 0.999983 | 2 | TRUE  | 2 |
| chrIV  | 6526713  | 6529791  | ReverseStr: | R.SWNTNS    | 0.999988 | 2 | TRUE  | 2 |
| chrX   | 5074365  | 5078039  | ExonBounc   | K.NQVCSTF   | 0.999043 | 1 | TRUE  | 1 |
| chrX   | 4557109  | 4558829  | ReverseStr: | _.LTASEQP   | 0.99997  | 2 | FALSE | 2 |
| chrII  | 6792188  | 6799222  | GeneBounc   | R.YYSKYSE   | 0.999976 | 2 | FALSE | 2 |
| chrI   | 2929786  | 2931363  | GeneBounc   | _.PNSAAGF   | 1        | 4 | FALSE | 4 |
| chrX   | 8578533  | 8580052  | ReverseStr: | K.KYQLNFC   | 0.99997  | 2 | TRUE  | 2 |
| chrIII | 9632104  | 9637032  | NovelExon   | M.FCSKSAI   | 0.994034 | 1 | TRUE  | 1 |
| chrV   | 13491054 | 13497358 | NovelExon   | K.SFWKKW    | 0.996226 | 1 | TRUE  | 1 |
| chrII  | 14063375 | 14065829 | FrameShift  | L.SHTSAMS   | 0.995755 | 1 | TRUE  | 1 |
| chrX   | 11271489 | 11275418 | NovelExon   | R.TVNYEVII  | 0.999999 | 2 | TRUE  | 2 |
| chrI   | 10030162 | 10046749 | ReverseStr: | R.STIWEIPE  | 1        | 2 | TRUE  | 2 |
| chrI   | 3176422  | 3192845  | FrameShift  | R.NLGKIAEI  | 0.996336 | 1 | TRUE  | 1 |
| chrX   | 1079420  | 1080650  | ReverseStr: | K.KRNEKIQ   | 0.999946 | 2 | TRUE  | 2 |
| chrIII | 11886385 | 11892922 | ReverseStr: | R.NVM PGL   | 0.999987 | 2 | TRUE  | 2 |
| chrIII | 13341426 | 13342507 | GeneBounc   | R.INSEGTP   | 1        | 5 | FALSE | 5 |
| chrII  | 8966859  | 8969411  | ReverseStr: | _.MTFSDA/   | 0.999945 | 2 | TRUE  | 2 |
| chrII  | 6842366  | 6847865  | Translated  | I.RSSSLFFL  | 0.999997 | 2 | TRUE  | 2 |
| chrIII | 5782691  | 5785089  | NovelExon   | Q.NPTWAG    | 0.997554 | 1 | TRUE  | 1 |
| chrV   | 15498725 | 15511403 | GeneBounc   | _.VIHHCDA   | 1        | 3 | FALSE | 3 |
| chrIII | 5260655  | 5263910  | NovelExon   | R.KVDKNSV   | 0.994641 | 1 | TRUE  | 1 |
| chrII  | 9991310  | 10000287 | NovelExon   | _.ISVSFSLW  | 0.994721 | 1 | TRUE  | 1 |
| chrV   | 7018883  | 7021785  | NovelExon   | K.PRLAKVS   | 0.997559 | 1 | TRUE  | 1 |
| chrI   | 14567320 | 14580967 | ReverseStr: | R.KKMKKK/   | 1        | 3 | FALSE | 3 |
| chrI   | 8095735  | 8098437  | FrameShift  | R.NSGIKGII  | 0.99948  | 1 | TRUE  | 1 |
| chrII  | 12203245 | 12209374 | NovelExon   | R.LFFQNFK   | 0.999005 | 1 | TRUE  | 1 |
| chrI   | 9317728  | 9327204  | NovelExon   | _.WSAWM     | 0.999695 | 1 | TRUE  | 1 |
| chrII  | 9386525  | 9390841  | NovelExon   | _.SLKNMKE   | 0.999347 | 1 | TRUE  | 1 |
| chrIII | 3505630  | 3510020  | ReverseStr: | K.NRK FSSK  | 1        | 4 | FALSE | 3 |
| chrX   | 4012209  | 4021438  | ReverseStr: | R.SKMKWT    | 0.999995 | 2 | TRUE  | 2 |
| chrV   | 11463276 | 11466743 | GeneBounc   | R.KIRDNLS   | 1        | 3 | FALSE | 3 |
| chrIII | 2406282  | 2410965  | NovelExon   | R.LVNMGA    | 0.994985 | 1 | TRUE  | 1 |
| chrII  | 7574403  | 7575729  | FrameShift  | K.IVEEMILR  | 0.998187 | 1 | TRUE  | 1 |
| chrIII | 5564985  | 5567344  | ExonBounc   | F.LQE QGT Y | 0.997202 | 1 | TRUE  | 1 |
| chrI   | 4773819  | 4777718  | FrameShift  | R.ATRDLYE   | 0.997021 | 1 | TRUE  | 1 |
| chrV   | 7751879  | 7754120  | ReverseStr: | K.FIAMGKM   | 0.999931 | 2 | FALSE | 2 |
| chrIV  | 4248063  | 4258166  | GeneBounc   | K.GGFIWW    | 0.999979 | 2 | FALSE | 2 |
| chrX   | 2509619  | 2515316  | GeneBounc   | _.EAALGGP   | 1        | 3 | FALSE | 3 |
| chrIII | 11949806 | 11960084 | NovelExon   | K.MCKKCAI   | 0.9943   | 1 | TRUE  | 1 |
| chrI   | 8687625  | 8690925  | ReverseStr: | _.TKVRSSF\  | 0.999977 | 2 | TRUE  | 2 |
| chrI   | 5268422  | 5269466  | GeneBounc   | _.LHLHTLTF  | 0.999967 | 3 | FALSE | 2 |
| chrIV  | 9547249  | 9560411  | GeneBounc   | K.IITHK KSK | 0.999911 | 2 | FALSE | 2 |

|        |          |          |             |             |          |   |       |   |
|--------|----------|----------|-------------|-------------|----------|---|-------|---|
| chrI   | 3727030  | 3731227  | GeneBounc   | R.IRDVESYI  | 0.999959 | 3 | FALSE | 2 |
| chrX   | 4961896  | 4964385  | FrameShift  | L.LHHHRVL   | 1        | 5 | TRUE  | 5 |
| chrX   | 4912270  | 4915956  | ReverseStr: | R.RRSCCLH   | 0.999996 | 2 | TRUE  | 2 |
| chrII  | 6048082  | 6049667  | FrameShift  | K.MQLKKM    | 0.997528 | 1 | TRUE  | 1 |
| chrV   | 4187189  | 4189992  | NovelExon   | R.EHVKKEN   | 0.998835 | 1 | TRUE  | 1 |
| chrI   | 10850426 | 10851226 | ReverseStr: | R.LRVLVEF)  | 0.999982 | 3 | TRUE  | 2 |
| chrIII | 7650487  | 7655967  | FrameShift  | K.KNEISTIS' | 0.998352 | 1 | TRUE  | 1 |
| chrIII | 851318   | 852388   | GeneBounc   | R.NQSAGIR   | 0.99995  | 2 | FALSE | 2 |
| chrV   | 4801085  | 4802612  | FrameShift  | _.QWKVKN    | 0.998639 | 1 | TRUE  | 1 |
| chrX   | 7823603  | 7825718  | FrameShift  | _.TLLEALDS  | 0.999998 | 2 | TRUE  | 2 |
| chrIII | 12538779 | 12547980 | FrameShift  | R.RWTTETF   | 0.996401 | 1 | TRUE  | 1 |
| chrX   | 2108976  | 2111871  | ReverseStr: | G.WSNLNM    | 0.999914 | 2 | TRUE  | 2 |
| chrI   | 3733471  | 3740482  | ReverseStr: | K.KFRSCWS   | 0.999959 | 3 | TRUE  | 2 |
| chrX   | 15811790 | 15814969 | FrameShift  | K.RLASASA'  | 0.998564 | 1 | TRUE  | 1 |
| chrII  | 319793   | 321107   | ExonBounc   | S.DFFPTEQ   | 1        | 1 | TRUE  | 1 |
| chrV   | 3921920  | 3922949  | FrameShift  | R.KYAITYST  | 0.995753 | 1 | TRUE  | 1 |
| chrII  | 11681761 | 11682780 | ReverseStr: | K.WKSFNFk   | 1        | 3 | TRUE  | 3 |
| chrIII | 11982454 | 11989785 | GeneBounc   | R.NFCNIPV   | 1        | 3 | FALSE | 3 |
| chrIV  | 8816335  | 8818512  | FrameShift  | _.KVDGEDk   | 0.994599 | 1 | TRUE  | 1 |
| chrI   | 2128593  | 2145971  | ReverseStr: | _.PNKKKRY   | 0.999926 | 2 | TRUE  | 2 |
| chrV   | 15610871 | 15612572 | FrameShift  | S.CSLCRSTF  | 0.997724 | 1 | TRUE  | 1 |
| chrII  | 14902417 | 14907457 | NovelExon   | _.MRGGGC    | 0.998008 | 1 | TRUE  | 1 |
| chrIV  | 4696827  | 4704005  | ReverseStr: | _.KTVFSKKI  | 0.99999  | 2 | TRUE  | 2 |
| chrX   | 16603313 | 16609451 | ReverseStr: | K.WWKHA/    | 0.99994  | 2 | TRUE  | 2 |
| chrIII | 3867835  | 3869527  | FrameShift  | R.IKAFTKYA  | 0.997722 | 1 | TRUE  | 1 |
| chrII  | 14771887 | 14772913 | NovelExon   | K.KSEMKSA   | 0.998139 | 1 | TRUE  | 1 |
| chrX   | 7572063  | 7581011  | NovelExon   | R.DLDDTSK   | 0.999066 | 1 | TRUE  | 1 |
| chrIII | 9614407  | 9615200  | NovelExon   | R.KGLFRGC   | 0.994752 | 1 | TRUE  | 1 |
| chrV   | 12181479 | 12184177 | ReverseStr: | R.KMAPVG    | 0.999917 | 2 | TRUE  | 2 |
| chrI   | 13814739 | 13827969 | NovelExon   | K.SWKSVOQ   | 0.996378 | 1 | TRUE  | 1 |
| chrV   | 11081034 | 11082479 | FrameShift  | _.LLGYGVR   | 1        | 8 | TRUE  | 5 |
| chrV   | 15223951 | 15225342 | ReverseStr: | _.KVEENLK   | 0.999981 | 3 | FALSE | 2 |
| chrV   | 15346665 | 15347371 | ReverseStr: | K.KFMAGS(   | 0.99998  | 2 | FALSE | 2 |
| chrV   | 18101560 | 18106377 | NovelExon   | R.TKCLSLA'  | 0.995467 | 1 | TRUE  | 1 |
| chrIII | 5841725  | 5843127  | NovelGene   | R.ATAGDGI   | 1        | 2 | FALSE | 2 |
| chrII  | 10661538 | 10665031 | ReverseStr: | R.YVGDGQ    | 0.99998  | 2 | FALSE | 2 |
| chrX   | 5349066  | 5352361  | ReverseStr: | K.KDGKSEN   | 0.999947 | 2 | FALSE | 2 |
| chrII  | 11868472 | 11869625 | FrameShift  | K.ESKDQM'   | 0.998365 | 1 | TRUE  | 1 |
| chrI   | 4665745  | 4671739  | FrameShift  | K.LILLMME   | 0.995309 | 1 | TRUE  | 1 |
| chrIV  | 3826867  | 3835889  | NovelExon   | K.MWKAAL    | 0.998275 | 1 | TRUE  | 1 |
| chrIV  | 13764433 | 13770583 | ReverseStr: | K.FGFLKDM   | 0.999968 | 3 | TRUE  | 2 |
| chrI   | 2686642  | 2689475  | ReverseStr: | K.VEEIWHM   | 0.999997 | 2 | TRUE  | 2 |
| chrX   | 6420999  | 6430573  | ReverseStr: | R.ELQPTPT:  | 1        | 3 | TRUE  | 3 |
| chrV   | 1141771  | 1146493  | ReverseStr: | K.NEKVSLD   | 1        | 4 | TRUE  | 4 |
| chrIV  | 649665   | 651792   | ReverseStr: | K.HNQPHPI   | 1        | 3 | FALSE | 3 |
| chrIV  | 12887036 | 12890486 | ReverseStr: | K.KYLFLDNI  | 0.999969 | 2 | TRUE  | 2 |
| chrIV  | 12391567 | 12392098 | GeneBounc   | R.AMRRCW    | 0.999975 | 3 | FALSE | 2 |

|        |          |          |                       |          |    |       |   |
|--------|----------|----------|-----------------------|----------|----|-------|---|
| chrIII | 6084622  | 6087404  | ReverseStr:_.FSWKLLD  | 0.999968 | 2  | TRUE  | 2 |
| chrI   | 5141678  | 5149229  | NovelExon K.HFEGGFS   | 0.994966 | 1  | TRUE  | 1 |
| chrIII | 1419859  | 1420561  | ReverseStr:R.IRRRPIRS | 1        | 19 | TRUE  | 8 |
| chrIII | 6173353  | 6176120  | TranslatedI_.RMNKLLL  | 0.999981 | 2  | TRUE  | 2 |
| chrIV  | 15022035 | 15025485 | GeneBouncR.ILSVPRLF   | 0.999936 | 2  | FALSE | 2 |
| chrIII | 10347481 | 10349646 | ExonBouncK.FKNFQNI    | 0.994606 | 1  | TRUE  | 1 |
| chrIV  | 3336921  | 3338864  | ReverseStr:_.ATAAASL  | 1        | 6  | TRUE  | 2 |
| chrV   | 6882021  | 6890939  | NovelExon R.STPAAET   | 1        | 1  | TRUE  | 1 |
| chrIII | 3006842  | 3028694  | ReverseStr:R.VFGAFP   | 0.999997 | 2  | FALSE | 2 |
| chrIII | 3864471  | 3867080  | GeneBouncR.IKAFTKYA   | 1        | 4  | FALSE | 3 |
| chrI   | 8353404  | 8357822  | NovelExon K.DHLSNDL   | 0.997662 | 1  | TRUE  | 1 |
| chrV   | 5114730  | 5119194  | ReverseStr:K.ILGILMM  | 0.999997 | 5  | TRUE  | 2 |
| chrII  | 5298899  | 5302339  | NovelGene R.VQKPFEK   | 1        | 4  | FALSE | 4 |
| chrI   | 1211495  | 1254700  | GeneBouncK.EFVICLNL   | 0.999949 | 2  | FALSE | 2 |
| chrII  | 1776316  | 1778532  | GeneBounc_.LLKFEYCR   | 0.999989 | 4  | FALSE | 2 |
| chrV   | 10566372 | 10576398 | ReverseStr:R.KRNKTNS  | 0.999998 | 2  | TRUE  | 2 |
| chrII  | 6799076  | 6800101  | ReverseStr:R.FADSSHL  | 0.999986 | 2  | TRUE  | 2 |
| chrII  | 8602736  | 8603530  | FrameShift_.GRVLR     | 0.99607  | 1  | TRUE  | 1 |
| chrV   | 16062641 | 16062868 | GeneBouncK.NLMPGIM    | 0.999994 | 2  | FALSE | 2 |
| chrIII | 3709312  | 3713264  | FrameShift R.SMRRCV   | 0.998648 | 1  | TRUE  | 1 |
| chrV   | 296599   | 300009   | GeneBouncR.KFGLNGE    | 1        | 3  | FALSE | 3 |
| chrV   | 17606324 | 17606896 | GeneBouncR.RSKQKCC    | 0.99999  | 2  | FALSE | 2 |
| chrX   | 7045197  | 7047571  | NovelGene R.KMEQKV    | 1        | 3  | FALSE | 3 |
| chrIV  | 13107633 | 13111479 | GeneBouncR.KMLHILM    | 0.999995 | 2  | FALSE | 2 |
| chrII  | 10824236 | 10841763 | ReverseStr:R.WTRSVH   | 0.999998 | 2  | FALSE | 2 |
| chrV   | 18860259 | 18894947 | ExonBouncK.WNERSKI    | 0.995301 | 1  | TRUE  | 1 |
| chrIII | 7573283  | 7575202  | FrameShift Q.YEDHVQ   | 0.997825 | 1  | TRUE  | 1 |
| chrV   | 9529985  | 9531553  | FrameShift R.SFLESTLS | 0.995222 | 1  | TRUE  | 1 |
| chrII  | 14721274 | 14733449 | NovelExon K.TKQKKAII  | 0.997059 | 1  | TRUE  | 1 |
| chrII  | 4353225  | 4355321  | ExonBounc_.FNIFQIIIF  | 0.998417 | 1  | TRUE  | 1 |
| chrIV  | 7779379  | 7782487  | ExonBouncR.MTGSAQ     | 1        | 3  | TRUE  | 2 |
| chrIII | 4849230  | 4849814  | ReverseStr:K.LIEELAMI | 0.999972 | 3  | TRUE  | 2 |
| chrIII | 11008123 | 11008835 | GeneBouncK.EAELKFA    | 0.999977 | 2  | FALSE | 2 |
| chrII  | 1321048  | 1323086  | NovelExon_.LLKVVEW    | 0.997925 | 3  | TRUE  | 1 |
| chrIV  | 2264966  | 2275701  | NovelExon K.NQNSMF    | 0.996904 | 1  | TRUE  | 1 |
| chrX   | 11667092 | 11672203 | FrameShift K.TLFNSTFS | 0.999419 | 1  | TRUE  | 1 |
| chrI   | 1050924  | 1053648  | FrameShift R.FVGNFVA  | 0.995602 | 1  | TRUE  | 1 |
| chrIV  | 13788911 | 13796199 | FrameShift R.LQNSSKY  | 0.996688 | 1  | TRUE  | 1 |
| chrI   | 4511441  | 4516084  | ReverseStr:K.KGFANW   | 0.99993  | 2  | TRUE  | 2 |
| chrV   | 12344167 | 12345900 | ReverseStr:K.YQNTKM   | 0.999968 | 2  | FALSE | 2 |
| chrX   | 13996238 | 13999282 | ExonBouncK.LFQKAQI    | 0.999288 | 1  | TRUE  | 1 |
| chrII  | 11489541 | 11492957 | FrameShift Q.PSGSRSS  | 0.99628  | 1  | TRUE  | 1 |
| chrIV  | 16444668 | 16446651 | GeneBouncR.TTGRPAR    | 1        | 3  | FALSE | 3 |
| chrI   | 9182991  | 9210332  | ReverseStr:K.FYIRARL  | 0.999995 | 2  | TRUE  | 2 |
| chrI   | 1885207  | 1894865  | NovelExon R.WSSASRE   | 0.999706 | 1  | TRUE  | 1 |
| chrIV  | 14954185 | 14958889 | ReverseStr:K.LDFSSILN | 1        | 3  | TRUE  | 3 |
| chrII  | 9477806  | 9479475  | NovelExon R.NIEFPKIP  | 0.997663 | 1  | TRUE  | 1 |

|        |          |          |            |             |          |    |       |   |
|--------|----------|----------|------------|-------------|----------|----|-------|---|
| chrI   | 1581716  | 1582702  | NovelGene  | K.HIFALPSR  | 0.999989 | 2  | FALSE | 2 |
| chrV   | 10184701 | 10185963 | GeneBound  | _.KGKLMKC   | 0.999992 | 4  | FALSE | 2 |
| chrII  | 7790508  | 7791326  | ExonBound  | F.QADADL    | 1        | 1  | TRUE  | 1 |
| chrI   | 2866510  | 2869378  | ReverseStr | R.KEKHDDK   | 0.999956 | 2  | FALSE | 2 |
| chrIII | 4692057  | 4693264  | ReverseStr | K.QCYWRV    | 0.999968 | 2  | TRUE  | 2 |
| chrI   | 2255925  | 2272868  | NovelExon  | R.IFTDPGG   | 0.998811 | 1  | TRUE  | 1 |
| chrV   | 5234780  | 5237153  | FrameShift | K.CIFFRNTA  | 0.995863 | 1  | TRUE  | 1 |
| chrI   | 7731145  | 7737989  | ExonBound  | R.NWKPKT    | 0.999753 | 1  | TRUE  | 1 |
| chrI   | 1740649  | 1751057  | ExonBound  | K.LPLSVPLP  | 0.995146 | 1  | TRUE  | 1 |
| chrI   | 4980308  | 4983956  | NovelExon  | K.MAEGKG    | 0.994287 | 1  | TRUE  | 1 |
| chrI   | 12582064 | 12583429 | GeneBound  | K.SRGDKKL   | 1        | 3  | FALSE | 3 |
| chrV   | 6097088  | 6099029  | GeneBound  | K.SGTIFDNI  | 1        | 13 | FALSE | 2 |
| chrV   | 6161547  | 6202609  | FrameShift | _.VVATAHV   | 0.994604 | 1  | TRUE  | 1 |
| chrV   | 7279372  | 7280512  | FrameShift | K.MNTEFLS   | 0.994342 | 1  | TRUE  | 1 |
| chrII  | 3987284  | 3988189  | GeneBound  | R.KMFPENI   | 0.999945 | 2  | FALSE | 2 |
| chrI   | 13246842 | 13249779 | FrameShift | R.CRMLMT    | 0.996649 | 1  | TRUE  | 1 |
| chrIV  | 14553570 | 14554855 | FrameShift | K.IFKIYASN  | 0.996461 | 1  | TRUE  | 1 |
| chrV   | 1858525  | 1859156  | NovelGene  | K.MTSAYAH   | 0.999995 | 2  | FALSE | 2 |
| chrX   | 5862722  | 5873285  | FrameShift | R.QAFNDD'   | 0.9957   | 1  | TRUE  | 1 |
| chrIV  | 14734314 | 14745518 | NovelExon  | _.LVFCALAI  | 0.994703 | 1  | TRUE  | 1 |
| chrX   | 8586114  | 8590313  | FrameShift | K.LEASDQK   | 0.99507  | 1  | TRUE  | 1 |
| chrIII | 6206751  | 6208265  | FrameShift | R.KSFQRNF   | 0.999999 | 2  | TRUE  | 2 |
| chrIII | 6436556  | 6439906  | ExonBound  | T.DTNCILFI  | 0.999055 | 1  | TRUE  | 1 |
| chrI   | 11364313 | 11374328 | ReverseStr | _.MNFIEFFI  | 0.999951 | 2  | TRUE  | 2 |
| chrII  | 8198752  | 8203954  | GeneBound  | R.VLTGDLA   | 0.999995 | 2  | FALSE | 2 |
| chrV   | 6971849  | 6973131  | ExonBound  | K.KVKKAPV   | 0.997341 | 1  | TRUE  | 1 |
| chrV   | 17879818 | 17888958 | ReverseStr | R.QFEYSGN   | 1        | 4  | TRUE  | 4 |
| chrIII | 4903961  | 4905398  | ReverseStr | K.TAYKCLQ   | 1        | 5  | TRUE  | 4 |
| chrV   | 4958590  | 4963072  | ReverseStr | K.ICKINCSIF | 1        | 2  | FALSE | 2 |
| chrIV  | 7782586  | 7783841  | GeneBound  | _.MTGSAQ    | 1        | 3  | FALSE | 2 |
| chrII  | 3415008  | 3416253  | NovelExon  | _.EVLLDTFS  | 0.996086 | 1  | TRUE  | 1 |
| chrIV  | 8511271  | 8513463  | ReverseStr | K.LQIISVIFC | 0.999965 | 2  | TRUE  | 2 |
| chrV   | 3316357  | 3318024  | FrameShift | R.YWRNLKI   | 0.994604 | 1  | TRUE  | 1 |
| chrI   | 12143998 | 12146968 | ReverseStr | _.VDQAEM    | 1        | 4  | FALSE | 3 |
| chrIV  | 16044804 | 16044995 | NovelGene  | K.MYIRSFLI  | 0.999996 | 2  | FALSE | 2 |
| chrIV  | 9832915  | 9834802  | FrameShift | K.SKTVLRCI  | 0.998221 | 1  | TRUE  | 1 |
| chrIII | 192105   | 194349   | FrameShift | R.DPKKFER   | 0.999944 | 2  | TRUE  | 2 |
| chrIV  | 4660985  | 4665200  | FrameShift | R.STRRRDS   | 0.998477 | 1  | TRUE  | 1 |
| chrIV  | 5975545  | 6004847  | FrameShift | K.IPNIFQFN  | 0.999993 | 2  | TRUE  | 2 |
| chrX   | 17155014 | 17157883 | ReverseStr | R.AYPSDLA   | 0.999964 | 2  | TRUE  | 2 |
| chrX   | 6142619  | 6150506  | ReverseStr | _.NDLRLKG   | 0.99993  | 2  | TRUE  | 2 |
| chrI   | 8196054  | 8208734  | NovelExon  | K.FECTTGG   | 0.994457 | 1  | TRUE  | 1 |
| chrV   | 16302728 | 16306136 | ReverseStr | A.LVHNEN\   | 0.999958 | 2  | TRUE  | 2 |
| chrII  | 2287291  | 2290082  | Translated | R.NHPPLYR   | 0.999933 | 2  | TRUE  | 2 |
| chrIII | 12251391 | 12273598 | NovelExon  | K.KMAKISE   | 0.998353 | 1  | TRUE  | 1 |
| chrII  | 11343659 | 11345556 | GeneBound  | K.RMYHRKI   | 0.99999  | 3  | FALSE | 2 |
| chrIII | 10781782 | 10791077 | ReverseStr | K.AYFNISKI  | 0.999955 | 2  | TRUE  | 2 |

|        |          |          |            |             |          |     |       |    |
|--------|----------|----------|------------|-------------|----------|-----|-------|----|
| chrI   | 7021981  | 7029075  | NovelExon  | K.YVYG TAR  | 0.994926 | 1   | TRUE  | 1  |
| chrIV  | 17383399 | 17386746 | GeneBound  | R.SEELV LKL | 0.999971 | 2   | FALSE | 2  |
| chrII  | 13321943 | 13330755 | NovelExon  | K.RKSC KKD  | 0.998309 | 1   | TRUE  | 1  |
| chrIV  | 3956999  | 3960133  | NovelExon  | _.CLDMFSF   | 0.998092 | 1   | TRUE  | 1  |
| chrIV  | 14379925 | 14383654 | NovelExon  | K.MKLK KKF  | 0.997168 | 1   | TRUE  | 1  |
| chrX   | 806994   | 810781   | FrameShift | R.FMHANS    | 0.995482 | 1   | TRUE  | 1  |
| chrIV  | 6326515  | 6329461  | GeneBound  | K.TKLIINL   | 0.999999 | 4   | FALSE | 2  |
| chrII  | 9190312  | 9194235  | ReverseStr | R.LRRHCCF   | 0.999934 | 2   | TRUE  | 2  |
| chrI   | 14287860 | 14295886 | ReverseStr | K.INLNSHSF  | 0.999995 | 2   | TRUE  | 2  |
| chrX   | 11804168 | 11805221 | ReverseStr | K.LLVPNFD   | 0.999998 | 2   | FALSE | 2  |
| chrV   | 12371711 | 12372851 | NovelExon  | K.SNISQATI  | 0.994927 | 1   | TRUE  | 1  |
| chrV   | 7522013  | 7522345  | ReverseStr | K.LLSFTHTM  | 0.999959 | 2   | FALSE | 2  |
| chrII  | 5945381  | 5956660  | ReverseStr | R.KPMEKVI   | 1        | 3   | TRUE  | 3  |
| chrI   | 2878580  | 2880938  | NovelExon  | K.KTGICVEI  | 0.995486 | 1   | TRUE  | 1  |
| chrIII | 13623213 | 13624071 | GeneBound  | _.ENTKLSSF  | 0.999979 | 2   | FALSE | 2  |
| chrX   | 256210   | 260110   | ReverseStr | R.KKFWAA'   | 0.999999 | 2   | TRUE  | 2  |
| chrX   | 2940862  | 2945479  | FrameShift | R.QKSSTLS\  | 0.995796 | 1   | TRUE  | 1  |
| chrIV  | 1963634  | 1964717  | ReverseStr | _.KTRSIENF  | 0.999976 | 2   | TRUE  | 2  |
| chrIV  | 7156888  | 7160097  | NovelExon  | K.VTKMIVY   | 0.995463 | 1   | TRUE  | 1  |
| chrII  | 3502971  | 3504912  | FrameShift | K.SQISQATI  | 0.998892 | 1   | TRUE  | 1  |
| chrX   | 9233583  | 9234557  | FrameShift | K.SRRRRRTS  | 0.995209 | 1   | TRUE  | 1  |
| chrI   | 4906824  | 4911832  | GeneBound  | R.RVYGGGI   | 0.999983 | 2   | FALSE | 2  |
| chrIII | 11775016 | 11776578 | ReverseStr | K.RSLFLCISI | 0.999997 | 2   | TRUE  | 2  |
| chrIII | 6969971  | 6971948  | ReverseStr | N.GVRYIFV   | 1        | 286 | TRUE  | 62 |
| chrII  | 4379886  | 4383290  | NovelExon  | R.ERGNIFS   | 0.996905 | 1   | TRUE  | 1  |
| chrII  | 10061486 | 10074384 | ReverseStr | K.NGGRDSI   | 1        | 6   | TRUE  | 6  |
| chrIII | 12386796 | 12387620 | FrameShift | R.RKEDMD    | 0.994672 | 1   | TRUE  | 1  |
| chrI   | 10570068 | 10571908 | GeneBound  | K.MPLVGI    | 1        | 4   | FALSE | 2  |
| chrII  | 15019147 | 15025692 | ReverseStr | _.EFKNSSIK  | 0.999939 | 2   | FALSE | 2  |
| chrI   | 2621957  | 2623272  | ReverseStr | K.RSLAMD    | 0.999965 | 2   | FALSE | 2  |
| chrIII | 4802972  | 4804715  | GeneBound  | R.RNDRKVI   | 0.99999  | 2   | FALSE | 2  |
| chrIV  | 2688959  | 2703975  | FrameShift | R.NGFSGSII  | 0.997323 | 1   | TRUE  | 1  |
| chrII  | 11234988 | 11236386 | GeneBound  | K.KTPNFAP   | 0.999959 | 2   | FALSE | 2  |
| chrIV  | 2198997  | 2204545  | ReverseStr | K.SPIPGATC  | 0.999956 | 2   | TRUE  | 2  |
| chrX   | 4728883  | 4728922  | NovelGene  | R.KNACMLI   | 0.999986 | 2   | FALSE | 2  |
| chrV   | 4517668  | 4549277  | NovelExon  | K.FFFGFFDI  | 1        | 1   | TRUE  | 1  |
| chrV   | 9693037  | 9694783  | FrameShift | R.SSNCDCS   | 0.996485 | 1   | TRUE  | 1  |
| chrIV  | 9796669  | 9797336  | ReverseStr | R.WTTGALI   | 1        | 4   | FALSE | 4  |
| chrIII | 1419194  | 1419642  | GeneBound  | _.NLDVGEC   | 1        | 8   | FALSE | 3  |
| chrII  | 933044   | 936933   | ExonBound  | K.KMILNSA   | 0.996493 | 1   | TRUE  | 1  |
| chrIII | 11485374 | 11487247 | ReverseStr | R.LLMSRFS   | 0.999954 | 2   | TRUE  | 2  |
| chrII  | 10993448 | 11012173 | ReverseStr | K.QKMGQC    | 0.999945 | 2   | TRUE  | 2  |
| chrIII | 12771777 | 12779625 | NovelExon  | K.TCAIDKR   | 0.997298 | 1   | TRUE  | 1  |
| chrV   | 5695073  | 5696277  | NovelGene  | R.YSRGLSCI  | 0.999984 | 2   | FALSE | 2  |
| chrV   | 5593693  | 5594486  | GeneBound  | K.FVHYNAM   | 0.999997 | 2   | FALSE | 2  |
| chrII  | 9991310  | 10000287 | NovelExon  | K.VDKNCGI   | 0.996292 | 1   | TRUE  | 1  |
| chrIII | 10629979 | 10633402 | FrameShift | R.ITDSGHQ   | 0.994526 | 1   | TRUE  | 1  |

|        |          |          |            |             |          |    |       |   |
|--------|----------|----------|------------|-------------|----------|----|-------|---|
| chrV   | 17924890 | 17934201 | FrameShift | K.LSCSRSTI  | 0.995402 | 1  | TRUE  | 1 |
| chrX   | 1022275  | 1022377  | NovelGene  | R.KDGDDG    | 0.999974 | 2  | FALSE | 2 |
| chrIII | 3832581  | 3834570  | GeneBounc  | K.VTTSWVI   | 1        | 4  | FALSE | 3 |
| chrII  | 4753439  | 4755596  | FrameShift | R.SPILLWIH  | 0.994053 | 1  | TRUE  | 1 |
| chrII  | 7754515  | 7755104  | ReverseStr | ._TDETKDC   | 0.999988 | 4  | TRUE  | 2 |
| chrV   | 1460369  | 1461614  | FrameShift | K.RKPKAPG   | 0.998616 | 1  | TRUE  | 1 |
| chrX   | 15918067 | 15920353 | GeneBounc  | K.ARTAVRII  | 1        | 3  | FALSE | 3 |
| chrII  | 11044077 | 11045910 | ReverseStr | R.ARMQRKQ   | 1        | 4  | FALSE | 4 |
| chrX   | 9391586  | 9394643  | ExonBounc  | R.TTADYTV   | 0.997581 | 1  | TRUE  | 1 |
| chrII  | 10581074 | 10582460 | FrameShift | K.EIMNGRk   | 0.996724 | 1  | TRUE  | 1 |
| chrII  | 14525237 | 14525958 | ReverseStr | K.KVSNFKN   | 0.99998  | 2  | TRUE  | 2 |
| chrIII | 11929548 | 11933541 | NovelExon  | R.NECLKLQ   | 0.998832 | 1  | TRUE  | 1 |
| chrIII | 8258274  | 8265725  | NovelExon  | K.NGGCKLL   | 0.996721 | 1  | TRUE  | 1 |
| chrI   | 11156737 | 11158832 | GeneBounc  | R.MSHFGLI   | 0.99999  | 2  | FALSE | 2 |
| chrV   | 13469050 | 13473570 | NovelExon  | K.KLDKNFY   | 0.996684 | 1  | TRUE  | 1 |
| chrIV  | 11329469 | 11332922 | ReverseStr | L.EKDMLQI   | 1        | 5  | TRUE  | 3 |
| chrI   | 13943338 | 13951616 | ReverseStr | ._ARTKRAS   | 1        | 11 | FALSE | 7 |
| chrV   | 16023331 | 16024175 | GeneBounc  | ._FIFSVVVF  | 0.999971 | 2  | FALSE | 2 |
| chrII  | 8467123  | 8467965  | ReverseStr | K.GCSSNLE   | 0.999988 | 2  | FALSE | 2 |
| chrIII | 6483165  | 6488822  | FrameShift | R.LQRSQVK   | 0.994452 | 1  | TRUE  | 1 |
| chrV   | 2148656  | 2150975  | ReverseStr | R.EFAIFNAI  | 0.999934 | 2  | TRUE  | 2 |
| chrIV  | 3698508  | 3699718  | NovelExon  | ._MTVSSKI   | 0.999787 | 1  | TRUE  | 1 |
| chrII  | 5466457  | 5473788  | FrameShift | R.GGCAGA    | 0.999517 | 1  | TRUE  | 1 |
| chrI   | 4714321  | 4715486  | GeneBounc  | R.TEEEMGI   | 0.999969 | 2  | FALSE | 2 |
| chrIV  | 7537965  | 7541885  | NovelExon  | K.KEIKIFHSI | 0.994966 | 1  | TRUE  | 1 |
| chrV   | 9036368  | 9040267  | ExonBounc  | K.EEQLMNI   | 0.995417 | 1  | TRUE  | 1 |
| chrIII | 11933902 | 11946917 | ReverseStr | K.ILFFLLKF  | 0.999993 | 2  | TRUE  | 2 |
| chrX   | 6716319  | 6718425  | ReverseStr | ._GFQAN     | 0.999964 | 2  | TRUE  | 2 |
| chrX   | 5061023  | 5062174  | GeneBounc  | R.VLQMAK    | 0.999982 | 2  | FALSE | 2 |
| chrI   | 11917733 | 11923906 | NovelExon  | K.SNFSLKKI  | 0.998485 | 1  | TRUE  | 1 |
| chrX   | 1563839  | 1565283  | NovelGene  | R.RDMTPEI   | 1        | 3  | FALSE | 3 |
| chrIV  | 10281615 | 10284222 | ReverseStr | R.IENFNITL  | 0.999994 | 2  | TRUE  | 2 |
| chrX   | 15918067 | 15920353 | FrameShift | ._RMENWC    | 0.997889 | 1  | TRUE  | 1 |
| chrII  | 6792188  | 6799222  | FrameShift | K.TVPKIYHI  | 0.997839 | 1  | TRUE  | 1 |
| chrI   | 13184901 | 13188286 | FrameShift | ._YFCIGRIG  | 0.99468  | 1  | TRUE  | 1 |
| chrIV  | 9725232  | 9728549  | FrameShift | ._RAECTSYI  | 0.998547 | 1  | TRUE  | 1 |
| chrX   | 563721   | 572702   | FrameShift | K.NQGVYSI   | 0.998617 | 1  | TRUE  | 1 |
| chrX   | 2621266  | 2664365  | NovelExon  | K.TGFGING   | 0.99427  | 1  | TRUE  | 1 |
| chrII  | 4433464  | 4435365  | FrameShift | ._KTWSDTI   | 0.994234 | 1  | TRUE  | 1 |
| chrIV  | 8184681  | 8188865  | GeneBounc  | K.QKLFMW    | 0.999963 | 3  | FALSE | 2 |
| chrIV  | 572723   | 583601   | NovelExon  | R.RSDREEK   | 0.996375 | 1  | TRUE  | 1 |
| chrV   | 12213308 | 12225901 | NovelExon  | K.QVLEKFN   | 0.999766 | 1  | TRUE  | 1 |
| chrII  | 14172762 | 14175099 | ReverseStr | K.KEISSLLM  | 0.999979 | 2  | TRUE  | 2 |
| chrIII | 11751157 | 11773583 | NovelExon  | K.NCHFSQk   | 0.996474 | 1  | TRUE  | 1 |
| chrIV  | 386699   | 387893   | FrameShift | ._LFQLFRGI  | 0.996721 | 1  | TRUE  | 1 |
| chrII  | 3228888  | 3230525  | FrameShift | R.WTNLLH!   | 0.997914 | 1  | TRUE  | 1 |
| chrX   | 10656535 | 10659514 | GeneBounc  | K.NKMTCRI   | 0.999925 | 2  | FALSE | 2 |

|        |          |          |            |            |          |   |       |   |
|--------|----------|----------|------------|------------|----------|---|-------|---|
| chrIII | 765191   | 771386   | ExonBound  | K.FQVISSEV | 0.998254 | 1 | TRUE  | 1 |
| chrIV  | 17094045 | 17095275 | FrameShift | K.IKPNVTRI | 0.997431 | 1 | TRUE  | 1 |
| chrV   | 10883759 | 10886083 | FrameShift | K.LVEDNNL  | 0.998633 | 1 | TRUE  | 1 |
| chrX   | 180080   | 181874   | ReverseStr | K.IGGGGGC  | 0.999936 | 2 | FALSE | 2 |
| chrIV  | 12132841 | 12135073 | ReverseStr | K.VLLTGEEI | 0.999989 | 2 | TRUE  | 2 |
| chrIV  | 14621987 | 14623936 | NovelExon  | R.IGGAGAF  | 0.99611  | 1 | TRUE  | 1 |
| chrIV  | 8261131  | 8266441  | NovelExon  | _.WCLKLERR | 0.996982 | 1 | TRUE  | 1 |
| chrIV  | 13786919 | 13788698 | FrameShift | K.KMGRLM   | 0.998056 | 1 | TRUE  | 1 |
| chrV   | 13404018 | 13406001 | ReverseStr | R.LVSIFWG  | 1        | 3 | FALSE | 3 |
| chrX   | 10846568 | 10848544 | NovelGene  | K.KCMFNIK  | 0.999945 | 2 | FALSE | 2 |
| chrIII | 9145248  | 9145899  | GeneBound  | R.QCLLMEC  | 0.999988 | 2 | FALSE | 2 |
| chrIII | 8439394  | 8443535  | GeneBound  | F.QVFENVV  | 0.999999 | 2 | FALSE | 2 |
| chrIV  | 388084   | 388733   | GeneBound  | F.ENVVEVII | 1        | 5 | FALSE | 2 |
| chrIV  | 4859247  | 4861486  | NovelExon  | K.ACLNVTY  | 0.999078 | 1 | TRUE  | 1 |
| chrIII | 5226783  | 5227650  | GeneBound  | R.LLNYATSI | 0.999999 | 2 | FALSE | 2 |
| chrIII | 12152798 | 12159556 | NovelExon  | R.FLKRDFSI | 0.996843 | 1 | TRUE  | 1 |
| chrI   | 7522112  | 7526198  | FrameShift | R.IAQFNET  | 0.998742 | 1 | TRUE  | 1 |
| chrI   | 10572018 | 10577127 | FrameShift | R.VIRMNRF  | 0.998065 | 1 | TRUE  | 1 |
| chrI   | 5018981  | 5020166  | ExonBound  | F.QGNGYIS  | 0.995821 | 1 | TRUE  | 1 |
| chrX   | 2909546  | 2918027  | FrameShift | R.EATETIR. | 0.995443 | 1 | TRUE  | 1 |
| chrIII | 2331566  | 2342004  | GeneBound  | K.NFAFFSN  | 0.999985 | 3 | FALSE | 2 |
| chrIII | 8083630  | 8085449  | ReverseStr | R.DIRQIKW  | 0.999996 | 2 | TRUE  | 2 |
| chrV   | 20356771 | 20365687 | ReverseStr | R.QIAQRGE  | 0.999987 | 2 | TRUE  | 2 |
| chrIII | 9331431  | 9332200  | ReverseStr | R.IEMFSLKI | 0.999985 | 2 | FALSE | 2 |
| chrI   | 1305577  | 1328230  | NovelExon  | K.VPSGAPP  | 0.998228 | 1 | TRUE  | 1 |
| chrIV  | 3032764  | 3050100  | ReverseStr | R.GVRRCRF  | 0.999975 | 2 | TRUE  | 2 |
| chrIV  | 17096361 | 17100211 | NovelExon  | _.KSSKNRA  | 0.999345 | 1 | TRUE  | 1 |
| chrX   | 421708   | 422777   | FrameShift | _.ICWTTRT  | 0.994853 | 1 | TRUE  | 1 |
| chrI   | 2924934  | 2928140  | NovelExon  | K.FRVQYQC  | 1        | 1 | TRUE  | 1 |
| chrIII | 9946984  | 9947844  | GeneBound  | R.KKMLNVI  | 0.999932 | 2 | FALSE | 2 |
| chrII  | 2978419  | 2986018  | NovelExon  | _.SNYSTRM  | 0.994227 | 1 | TRUE  | 1 |
| chrI   | 9949083  | 9953341  | ExonBound  | R.HFGYGLA  | 0.995455 | 1 | TRUE  | 1 |
| chrX   | 10156799 | 10160379 | ReverseStr | R.RSSSQCC  | 0.999997 | 2 | TRUE  | 2 |
| chrI   | 9501260  | 9505156  | NovelExon  | K.NGFFCVK  | 0.997984 | 1 | TRUE  | 1 |
| chrV   | 4890415  | 4891408  | ExonBound  | M.PSMEEV   | 1        | 1 | TRUE  | 1 |
| chrIV  | 11814224 | 11819438 | ReverseStr | K.KNRSKNF  | 0.999941 | 2 | TRUE  | 2 |
| chrII  | 10785393 | 10787206 | FrameShift | K.DVARVNI  | 0.999538 | 1 | TRUE  | 1 |
| chrIII | 13752368 | 13755760 | GeneBound  | R.GTAPSDF  | 1        | 4 | FALSE | 3 |
| chrIV  | 10735422 | 10737161 | FrameShift | R.EFLREAEI | 0.997877 | 1 | TRUE  | 1 |
| chrX   | 194448   | 197901   | ExonBound  | K.MLQKIQF  | 0.999134 | 1 | TRUE  | 1 |
| chrI   | 4685869  | 4698576  | FrameShift | Y.LSTTMVT  | 0.997286 | 1 | TRUE  | 1 |
| chrI   | 13861456 | 13887641 | NovelExon  | _.RSEFSSNI | 0.998126 | 1 | TRUE  | 1 |
| chrIII | 12992424 | 12993603 | ReverseStr | R.LIYHSSDF | 1        | 3 | FALSE | 3 |
| chrIII | 1870244  | 1877106  | ReverseStr | W.LGVAPP   | 0.999975 | 2 | TRUE  | 2 |
| chrIV  | 10695360 | 10697053 | FrameShift | R.AVEAGSR  | 0.996604 | 1 | TRUE  | 1 |
| chrX   | 7050584  | 7055330  | FrameShift | K.LANGENF  | 0.997475 | 1 | TRUE  | 1 |
| chrX   | 14313651 | 14326730 | ExonBound  | A.NDLSSAN  | 0.995021 | 1 | TRUE  | 1 |



|        |          |          |             |            |          |   |       |   |
|--------|----------|----------|-------------|------------|----------|---|-------|---|
| chrII  | 13547179 | 13553354 | GeneBounc   | K.LINLRFSK | 0.999946 | 2 | FALSE | 2 |
| chrIII | 4153575  | 4154619  | GeneBounc   | R.TKLRKFG  | 0.999935 | 2 | FALSE | 2 |
| chrV   | 12523628 | 12525637 | ReverseStr  | K.IGQELCS  | 1        | 3 | TRUE  | 3 |
| chrIII | 10507017 | 10517959 | ReverseStr  | R.NVIEAVE  | 1        | 2 | TRUE  | 2 |
| chrX   | 7776979  | 7782387  | NovelExon   | K.RKHAQQ   | 0.996552 | 1 | TRUE  | 1 |
| chrIII | 13018834 | 13020130 | FrameShift  | R.TQNATAF  | 0.99679  | 1 | TRUE  | 1 |
| chrIII | 4867026  | 4867433  | GeneBounc   | R.IGLHESPC | 0.999965 | 2 | FALSE | 2 |
| chrII  | 2812687  | 2815549  | GeneBounc   | K.KNCSIKW  | 0.999996 | 2 | FALSE | 2 |
| chrIII | 1214944  | 1215279  | FrameShift  | R.RWMRRI   | 0.999929 | 2 | TRUE  | 2 |
| chrIII | 8659793  | 8667394  | ReverseStr  | R.EMRASGI  | 0.999991 | 2 | TRUE  | 2 |
| chrV   | 17023449 | 17025505 | GeneBounc   | P.MLLMKSI  | 0.999973 | 2 | FALSE | 2 |
| chrIII | 10320965 | 10325561 | ExonBounc   | R.TYYNVRF  | 0.99725  | 1 | TRUE  | 1 |
| chrIV  | 11783918 | 11792570 | NovelExon   | K.GSRKMN   | 1        | 1 | TRUE  | 1 |
| chrV   | 1081622  | 1084204  | ReverseStr  | K.YRWTTVC  | 0.999952 | 2 | TRUE  | 2 |
| chrI   | 11953502 | 11961977 | ReverseStr  | R.ETRCAGM  | 1        | 3 | TRUE  | 3 |
| chrII  | 4392951  | 4404856  | FrameShift  | _.SKKNVKN  | 0.997176 | 1 | TRUE  | 1 |
| chrII  | 10098719 | 10099808 | ReverseStr  | R.CSLVFFI  | 1        | 4 | TRUE  | 3 |
| chrII  | 9113157  | 9132148  | ReverseStr  | K.YVKFLDE  | 0.999968 | 2 | TRUE  | 2 |
| chrIII | 367325   | 377557   | FrameShift  | R.MTPLIGM  | 0.995093 | 1 | TRUE  | 1 |
| chrX   | 9531572  | 9535161  | NovelExon   | R.FKFLPKCF | 0.995622 | 1 | TRUE  | 1 |
| chrIII | 9002042  | 9002559  | ReverseStr  | L.MLAKINE  | 1        | 3 | FALSE | 3 |
| chrX   | 15385971 | 15387037 | NovelGene   | K.SLSRCAEF | 0.999972 | 2 | FALSE | 2 |
| chrX   | 14773469 | 14783495 | ReverseStr  | _.FHVAKCT  | 0.999953 | 2 | TRUE  | 2 |
| chrIV  | 16773797 | 16785024 | FrameShift  | T.YNEPKPP  | 0.997213 | 1 | TRUE  | 1 |
| chrV   | 12292195 | 12293783 | ReverseStr  | K.VLCSKVG  | 0.999996 | 3 | FALSE | 2 |
| chrIII | 9747387  | 9748767  | GeneBounc   | R.LCESGAA  | 1        | 2 | FALSE | 2 |
| chrII  | 10100251 | 10103000 | GeneBounc   | K.FFLKSVSF | 0.999995 | 2 | FALSE | 2 |
| chrI   | 9829750  | 9830569  | FrameShift  | R.QEDKNGI  | 0.996176 | 1 | TRUE  | 1 |
| chrIII | 3950832  | 3951084  | NovelGene   | K.LDYANNY  | 0.999932 | 2 | FALSE | 2 |
| chrX   | 7823601  | 7825047  | NovelSplice | Q.EMGKGS   | 0.999998 | 2 | TRUE  | 2 |
| chrI   | 2128593  | 2145971  | NovelExon   | K.FFVAQKV  | 0.998192 | 1 | TRUE  | 1 |
| chrV   | 9978767  | 9980745  | ReverseStr  | K.NHDGCH   | 0.999977 | 2 | TRUE  | 2 |
| chrV   | 5480734  | 5482399  | FrameShift  | R.FGSDLPM  | 0.998735 | 1 | TRUE  | 1 |
| chrX   | 11982723 | 11983831 | ExonBounc   | R.FHNDFQI  | 0.998016 | 1 | TRUE  | 1 |
| chrV   | 6376142  | 6382398  | NovelGene   | R.RIKKYEAC | 1        | 4 | FALSE | 4 |
| chrII  | 13036275 | 13036813 | GeneBounc   | K.QLESKIFG | 0.999991 | 2 | FALSE | 2 |
| chrIV  | 10679569 | 10680455 | FrameShift  | R.WMASM    | 0.995165 | 1 | TRUE  | 1 |
| chrI   | 13814739 | 13827969 | NovelExon   | R.EIWSFCA  | 0.994597 | 1 | TRUE  | 1 |
| chrV   | 14449697 | 14452959 | FrameShift  | R.WLKMQL   | 0.995895 | 1 | TRUE  | 1 |
| chrII  | 10579896 | 10580985 | GeneBounc   | K.EIMNGRk  | 1        | 3 | FALSE | 3 |
| chrV   | 9634837  | 9645478  | NovelExon   | K.IIQYSEVR | 0.998689 | 1 | TRUE  | 1 |
| chrIII | 7972317  | 7973321  | ReverseStr  | R.RNDAKSC  | 1        | 2 | TRUE  | 2 |
| chrII  | 2091748  | 2093858  | ReverseStr  | _.KFGPKKF  | 0.999963 | 2 | FALSE | 2 |
| chrIII | 4879709  | 4881461  | FrameShift  | R.ISMTTSG  | 0.994686 | 1 | TRUE  | 1 |
| chrX   | 17492599 | 17494378 | NovelGene   | V.RAGESSV  | 0.999998 | 2 | FALSE | 2 |
| chrII  | 1339693  | 1350143  | ReverseStr  | K.MLGYCSF  | 0.999942 | 2 | TRUE  | 2 |
| chrIV  | 6744566  | 6748413  | GeneBounc   | K.KSIFCTLY | 0.999965 | 2 | FALSE | 2 |

|        |          |          |             |            |          |    |       |    |
|--------|----------|----------|-------------|------------|----------|----|-------|----|
| chrII  | 1311221  | 1320445  | FrameShift  | _.FVPGIPLF | 0.996774 | 1  | TRUE  | 1  |
| chrIV  | 4015609  | 4028123  | ReverseStr: | K.TPTGCER  | 0.999994 | 3  | TRUE  | 2  |
| chrIII | 12431538 | 12433764 | NovelExon   | K.NQKNIFL  | 0.994896 | 1  | TRUE  | 1  |
| chrI   | 8779731  | 8785409  | NovelExon   | _.KQNIMM   | 0.997924 | 1  | TRUE  | 1  |
| chrI   | 11216110 | 11221967 | ReverseStr: | R.VQNLCF   | 0.99994  | 2  | TRUE  | 2  |
| chrIII | 2781048  | 2782762  | ReverseStr: | R.EILHFSM  | 1        | 3  | FALSE | 3  |
| chrX   | 6451326  | 6451822  | ReverseStr: | K.ILMICFEK | 1        | 3  | TRUE  | 3  |
| chrII  | 9116555  | 9132148  | NovelExon   | R.ILNIEMN  | 0.995651 | 1  | TRUE  | 1  |
| chrI   | 550711   | 556641   | GeneBound   | K.SRPQPNT  | 0.999947 | 2  | FALSE | 2  |
| chrIII | 9081751  | 9082437  | GeneBound   | K.FAMWPT   | 1        | 6  | FALSE | 4  |
| chrI   | 11917733 | 11923906 | ReverseStr: | N.FRLLVIFS | 0.999946 | 2  | TRUE  | 2  |
| chrII  | 13279703 | 13285747 | ReverseStr: | K.MSKGGG   | 1        | 3  | FALSE | 3  |
| chrI   | 13734658 | 13751112 | NovelExon   | K.MELFYPE  | 0.994887 | 1  | TRUE  | 1  |
| chrI   | 5850041  | 5851831  | ReverseStr: | R.FLQMSPF  | 0.999971 | 2  | TRUE  | 2  |
| chrX   | 9428372  | 9430264  | ReverseStr: | K.FACECCQ  | 0.999996 | 2  | TRUE  | 2  |
| chrII  | 2812687  | 2815549  | GeneBound   | R.DAEKIGE  | 0.999974 | 2  | FALSE | 2  |
| chrII  | 6720391  | 6729285  | Translated  | K.MPMGV    | 0.999993 | 2  | TRUE  | 2  |
| chrIII | 10104749 | 10106398 | ReverseStr: | R.QIFVGNT  | 1        | 3  | FALSE | 3  |
| chrIV  | 2688959  | 2703975  | ReverseStr: | R.KNQQKLI  | 0.999974 | 2  | TRUE  | 2  |
| chrIV  | 11430255 | 11447043 | ReverseStr: | R.SRRIFLEM | 0.999986 | 2  | TRUE  | 2  |
| chrX   | 6935689  | 6938995  | FrameShift  | R.SAGQRIC  | 0.996598 | 1  | TRUE  | 1  |
| chrII  | 1088187  | 1088229  | NovelGene   | K.FLPAAGV  | 0.999992 | 2  | FALSE | 2  |
| chrIV  | 6231033  | 6232409  | FrameShift  | R.YVSRRC   | 0.994717 | 1  | TRUE  | 1  |
| chrIV  | 205239   | 208004   | NovelExon   | R.KNAELEIS | 0.995228 | 1  | TRUE  | 1  |
| chrIV  | 5520784  | 5523374  | NovelGene   | K.VNSSVSS  | 0.999992 | 2  | FALSE | 2  |
| chrIII | 12626474 | 12651656 | NovelExon   | R.QTGTLPE  | 0.995357 | 1  | TRUE  | 1  |
| chrV   | 16271549 | 16272547 | FrameShift  | R.RKKRKR   | 1        | 1  | TRUE  | 1  |
| chrX   | 8697765  | 8702770  | FrameShift  | R.AWSVIGM  | 0.995001 | 1  | TRUE  | 1  |
| chrV   | 2896635  | 2898415  | FrameShift  | R.WICNSLN  | 0.999211 | 1  | TRUE  | 1  |
| chrII  | 8603807  | 8606693  | GeneBound   | R.NYVQPNI  | 1        | 3  | FALSE | 3  |
| chrII  | 10385273 | 10388073 | ReverseStr: | R.NEQLNK   | 1        | 3  | TRUE  | 3  |
| chrV   | 359767   | 363669   | NovelExon   | R.NQEFRR   | 1        | 1  | TRUE  | 1  |
| chrV   | 10248882 | 10252870 | ReverseStr: | K.ENIKKKK  | 0.999948 | 2  | FALSE | 2  |
| chrIV  | 8006036  | 8008772  | NovelGene   | K.WMKYPL   | 1        | 2  | FALSE | 2  |
| chrIV  | 9401972  | 9412850  | FrameShift  | K.MILTTFR  | 0.999735 | 2  | TRUE  | 1  |
| chrX   | 15369929 | 15377616 | NovelExon   | R.EMSYHSI  | 0.999847 | 1  | TRUE  | 1  |
| chrI   | 1818515  | 1822933  | ReverseStr: | R.NQISITST | 0.999968 | 2  | FALSE | 2  |
| chrX   | 12705553 | 12808179 | ReverseStr: | K.NSEKSPC  | 0.999948 | 2  | TRUE  | 2  |
| chrV   | 20387684 | 20393371 | FrameShift  | _.EPPTSRI  | 0.995114 | 1  | TRUE  | 1  |
| chrV   | 12910097 | 12917205 | FrameShift  | _.ELVEELCS | 0.995816 | 1  | TRUE  | 1  |
| chrIV  | 8266738  | 8268421  | ReverseStr: | _.YCSVVFG  | 1        | 40 | TRUE  | 25 |
| chrI   | 7038899  | 7048833  | ExonBound   | R.RMSGGK   | 0.997795 | 1  | TRUE  | 1  |
| chrIV  | 13543375 | 13548208 | ReverseStr: | R.TLMHQA   | 0.999944 | 2  | TRUE  | 2  |
| chrIV  | 9859214  | 9862098  | ExonBound   | R.ASAEMF   | 0.999627 | 1  | TRUE  | 1  |
| chrX   | 6456650  | 6461833  | ExonBound   | S.CYPMAFC  | 0.995459 | 1  | TRUE  | 1  |
| chrIII | 11675562 | 11693677 | NovelExon   | K.ILLAVVPS | 0.99678  | 1  | TRUE  | 1  |
| chrI   | 14760637 | 14768969 | NovelExon   | R.FAGTIVCI | 0.994963 | 1  | TRUE  | 1  |

|        |          |          |            |              |          |   |       |   |
|--------|----------|----------|------------|--------------|----------|---|-------|---|
| chrV   | 19313246 | 19316483 | NovelExon  | R.RCAGSAC    | 0.994402 | 1 | TRUE  | 1 |
| chrII  | 12209174 | 12221724 | NovelExon  | R.KIDFFMIF   | 0.998832 | 1 | TRUE  | 1 |
| chrX   | 1132996  | 1148340  | ReverseStr | R.LVVYGAN    | 1        | 2 | TRUE  | 2 |
| chrII  | 10805335 | 10809933 | ReverseStr | K.ENESKSSI   | 1        | 3 | FALSE | 3 |
| chrX   | 6267013  | 6270997  | FrameShift | R.ARIAAQL    | 0.999181 | 1 | TRUE  | 1 |
| chrX   | 6142619  | 6150506  | FrameShift | _KFEVNFE     | 0.998239 | 1 | TRUE  | 1 |
| chrV   | 18716047 | 18719916 | ReverseStr | K.CLKCGISF   | 1        | 3 | TRUE  | 3 |
| chrX   | 10527940 | 10529189 | ReverseStr | F.NKVFQGC    | 1        | 4 | FALSE | 3 |
| chrIV  | 1310598  | 1313482  | ReverseStr | K.WQKIDEI    | 1        | 4 | TRUE  | 4 |
| chrX   | 7823603  | 7825047  | FrameShift | _TLLEALDS    | 0.999984 | 2 | TRUE  | 2 |
| chrIV  | 6335220  | 6336036  | ReverseStr | R.QLADNM     | 0.999971 | 3 | FALSE | 2 |
| chrIII | 3155260  | 3158385  | FrameShift | _LIVYFMSI    | 0.994208 | 1 | TRUE  | 1 |
| chrII  | 11410050 | 11411911 | FrameShift | K.QFFSGRA    | 0.999278 | 1 | TRUE  | 1 |
| chrII  | 13278105 | 13304159 | Translated | _QIPQSVG     | 0.99999  | 2 | TRUE  | 2 |
| chrIV  | 7635649  | 7641847  | FrameShift | K.ISTQTHIG   | 0.99657  | 1 | TRUE  | 1 |
| chrV   | 11462995 | 11466743 | GeneBound  | R.KIRDNLS    | 0.999933 | 2 | FALSE | 2 |
| chrII  | 1321044  | 1323094  | Translated | _LLKVVEW     | 1        | 5 | TRUE  | 3 |
| chrIV  | 359239   | 376069   | ReverseStr | R.QLRILRSE   | 0.999939 | 2 | TRUE  | 2 |
| chrV   | 11081034 | 11082479 | FrameShift | _RDEAQS      | 0.999957 | 2 | TRUE  | 2 |
| chrIII | 889944   | 895623   | GeneBound  | K.SKMLVIA    | 0.999928 | 2 | FALSE | 2 |
| chrIII | 2583975  | 2597013  | NovelExon  | _PYHCRLP     | 0.99684  | 1 | TRUE  | 1 |
| chrIII | 10562927 | 10565504 | NovelExon  | K.NACFLSN    | 0.99442  | 1 | TRUE  | 1 |
| chrI   | 12657752 | 12659370 | NovelExon  | R.LFWIIRSA   | 0.995569 | 1 | TRUE  | 1 |
| chrIII | 2151958  | 2197899  | FrameShift | R.SLHTLFST   | 0.998139 | 1 | TRUE  | 1 |
| chrIV  | 8620670  | 8626131  | ExonBound  | N.KMIFSMI    | 0.997105 | 1 | TRUE  | 1 |
| chrIV  | 1490658  | 1496019  | ReverseStr | L.QTKFDDA    | 1        | 2 | TRUE  | 2 |
| chrIV  | 1959854  | 1963238  | ExonBound  | R.NGSNLEP    | 0.995651 | 1 | TRUE  | 1 |
| chrII  | 4949896  | 4953482  | FrameShift | A.FNECLAS    | 0.994648 | 1 | TRUE  | 1 |
| chrI   | 15036362 | 15040476 | GeneBound  | R.RTLYLRRF   | 1        | 4 | FALSE | 3 |
| chrIII | 13624173 | 13625840 | ExonBound  | _ENTKLSSF    | 0.997022 | 1 | TRUE  | 1 |
| chrV   | 11149689 | 11151301 | FrameShift | K.NVERGA     | 0.997843 | 1 | TRUE  | 1 |
| chrI   | 398894   | 412513   | FrameShift | _QILEVFLM    | 0.997914 | 1 | TRUE  | 1 |
| chrIV  | 7081503  | 7082257  | ReverseStr | K.FSVTTQC    | 0.999938 | 2 | TRUE  | 2 |
| chrIV  | 2396242  | 2399419  | NovelExon  | K.TSGELSHI   | 0.997534 | 1 | TRUE  | 1 |
| chrX   | 16883600 | 16884468 | GeneBound  | R.LGWIGM     | 0.999993 | 2 | FALSE | 2 |
| chrIV  | 9401972  | 9412850  | NovelExon  | K.VLKNTPM    | 0.994497 | 1 | TRUE  | 1 |
| chrV   | 6239349  | 6252436  | GeneBound  | R.FDSLVL     | 1        | 5 | FALSE | 5 |
| chrIV  | 3808075  | 3819318  | NovelExon  | K.TTVTLQM    | 0.996283 | 1 | TRUE  | 1 |
| chrII  | 8567982  | 8569037  | ReverseStr | R.ESNVLPT    | 1        | 5 | FALSE | 5 |
| chrV   | 13200968 | 13202175 | ReverseStr | R.LSLPQGC    | 1        | 3 | TRUE  | 3 |
| chrV   | 18616571 | 18620213 | FrameShift | R.SESRPESL   | 0.995493 | 1 | TRUE  | 1 |
| chrX   | 8917383  | 8919377  | NovelExon  | R.GNATSTK    | 0.995943 | 1 | TRUE  | 1 |
| chrIV  | 5297919  | 5298375  | GeneBound  | K.IIEYIFTISF | 0.999936 | 2 | FALSE | 2 |
| chrV   | 19026434 | 19031561 | ReverseStr | R.MVEVNLI    | 1        | 5 | TRUE  | 4 |
| chrV   | 6235157  | 6237654  | NovelExon  | K.KTLVPTSF   | 0.996275 | 1 | TRUE  | 1 |
| chrV   | 8215545  | 8217683  | NovelExon  | K.PNWKKS     | 0.995705 | 1 | TRUE  | 1 |
| chrIV  | 7967446  | 7969539  | FrameShift | K.KQESNKC    | 0.998488 | 1 | TRUE  | 1 |

|        |          |          |                          |          |   |       |   |
|--------|----------|----------|--------------------------|----------|---|-------|---|
| chrX   | 11726203 | 11727830 | ReverseStr: R.IQNWLLV    | 0.999961 | 2 | TRUE  | 2 |
| chrV   | 13433040 | 13437533 | NovelExon _ .NFIFCQLS    | 0.999303 | 1 | TRUE  | 1 |
| chrII  | 11863430 | 11865394 | FrameShift K.YFKINILEI   | 0.994968 | 1 | TRUE  | 1 |
| chrIV  | 13476913 | 13502828 | ReverseStr: K.SPSKRDA    | 0.999951 | 2 | TRUE  | 2 |
| chrIV  | 3687806  | 3694738  | NovelExon K.NENFEPN      | 0.997392 | 1 | TRUE  | 1 |
| chrX   | 6577424  | 6579561  | NovelGene W.TCKDVQ       | 0.999975 | 2 | FALSE | 2 |
| chrV   | 4236404  | 4238088  | NovelExon R.MILEDLG      | 0.998676 | 1 | TRUE  | 1 |
| chrX   | 14020717 | 14022340 | FrameShift _ .QLLALHW    | 0.99968  | 1 | TRUE  | 1 |
| chrI   | 6460435  | 6464265  | GeneBounc R.KHKEIIIV     | 0.999999 | 2 | FALSE | 2 |
| chrII  | 5171900  | 5177430  | ReverseStr: K.YVYFFNK    | 1        | 3 | TRUE  | 3 |
| chrV   | 11415324 | 11420274 | ReverseStr: R.SSINAALF   | 0.999985 | 2 | TRUE  | 2 |
| chrV   | 1895796  | 1906518  | NovelExon R.QFADLPS      | 0.99415  | 1 | TRUE  | 1 |
| chrIV  | 14619493 | 14623936 | GeneBounc K.HFEIYTES     | 0.999959 | 2 | FALSE | 2 |
| chrIII | 1905958  | 1939562  | NovelExon K.SFADVDC      | 0.999035 | 1 | TRUE  | 1 |
| chrV   | 4517668  | 4549277  | NovelExon K.KAMAIQS      | 0.996207 | 1 | TRUE  | 1 |
| chrII  | 5945381  | 5956660  | ExonBounc K.VRHDVIM      | 0.996648 | 1 | TRUE  | 1 |
| chrIII | 7474907  | 7475796  | NovelGene K.FIEQKNKI     | 0.999998 | 2 | FALSE | 2 |
| chrV   | 18069992 | 18077432 | NovelExon K.FVKNRVIL     | 0.995678 | 1 | TRUE  | 1 |
| chrV   | 5085871  | 5087106  | FrameShift K.RLIWRIM     | 0.996931 | 1 | TRUE  | 1 |
| chrV   | 20479658 | 20480815 | GeneBounc P.AYSPMTT      | 0.999961 | 2 | FALSE | 2 |
| chrI   | 6216650  | 6219913  | GeneBounc Q.RQLHARI      | 1        | 4 | FALSE | 4 |
| chrIII | 4408523  | 4412189  | FrameShift _ .NRELREEI   | 0.997586 | 1 | TRUE  | 1 |
| chrIII | 1905958  | 1939562  | FrameShift K.TNKNNGNI    | 0.999991 | 2 | TRUE  | 2 |
| chrIV  | 8261131  | 8266441  | NovelExon _ .YLQHPIEE    | 0.994129 | 1 | TRUE  | 1 |
| chrIII | 6632832  | 6650972  | ReverseStr: K.QDAPKQI    | 0.999969 | 2 | FALSE | 2 |
| chrII  | 2473529  | 2478648  | GeneBounc K.KLENAET      | 0.999977 | 2 | FALSE | 2 |
| chrV   | 7527486  | 7527933  | NovelGene K.CVEDYRD      | 1        | 7 | FALSE | 7 |
| chrII  | 4991581  | 4993071  | ReverseStr: R.ERTTKQC    | 0.999966 | 2 | TRUE  | 2 |
| chrIV  | 5937433  | 5939220  | ReverseStr: R.ARAIEKN    | 0.999949 | 2 | TRUE  | 2 |
| chrIII | 4706943  | 4708399  | FrameShift K.EEAEKEKI    | 0.9979   | 1 | TRUE  | 1 |
| chrIII | 13439627 | 13455206 | NovelExon K.YGKNWC       | 0.996169 | 1 | TRUE  | 1 |
| chrV   | 5534115  | 5536229  | ReverseStr: K.ESLSSQFI   | 0.999954 | 2 | TRUE  | 2 |
| chrV   | 13415049 | 13416108 | ExonBounc K.LNFMICL      | 0.9981   | 1 | TRUE  | 1 |
| chrX   | 13991427 | 13995765 | ReverseStr: K.LFQKAQI    | 1        | 2 | FALSE | 2 |
| chrI   | 11741521 | 11743942 | ReverseStr: _ .KLFIIYFIM | 0.999928 | 2 | TRUE  | 2 |
| chrII  | 10702174 | 10714240 | ReverseStr: K.PLKLEIEM   | 1        | 3 | TRUE  | 3 |
| chrII  | 7627727  | 7651163  | NovelExon K.MICAYGC      | 0.997776 | 1 | TRUE  | 1 |
| chrV   | 19995956 | 20004456 | NovelExon K.MKNSGK       | 0.996727 | 1 | TRUE  | 1 |
| chrV   | 6035326  | 6037339  | FrameShift R.TVQFHAI     | 0.998398 | 1 | TRUE  | 1 |
| chrX   | 2370323  | 2372438  | NovelGene K.KTALNNII     | 0.999983 | 2 | FALSE | 2 |
| chrII  | 10468291 | 10470237 | FrameShift R.PMIGSSS     | 0.99895  | 1 | TRUE  | 1 |
| chrV   | 3595178  | 3597139  | NovelExon K.VLTSLPCK     | 0.995063 | 1 | TRUE  | 1 |
| chrV   | 6655534  | 6656484  | NovelExon _ .INLNSPFC    | 0.994269 | 1 | TRUE  | 1 |
| chrV   | 9960848  | 9962450  | ExonBounc R.KQDKQK       | 0.999419 | 1 | TRUE  | 1 |
| chrIV  | 1660111  | 1669682  | ReverseStr: R.APHGFAS    | 0.999989 | 2 | FALSE | 2 |
| chrV   | 14829162 | 14847297 | ReverseStr: K.KRICDDC    | 1        | 5 | TRUE  | 3 |
| chrI   | 4644438  | 4645627  | GeneBounc K.GWSVPLI      | 0.999996 | 2 | FALSE | 2 |

|        |          |          |            |             |          |   |       |   |
|--------|----------|----------|------------|-------------|----------|---|-------|---|
| chrIV  | 10524748 | 10530572 | NovelExon  | K.NRTLGS    | 0.997125 | 1 | TRUE  | 1 |
| chrV   | 14828623 | 14829328 | GeneBound  | R.FYQISSIF  | 1        | 5 | FALSE | 3 |
| chrI   | 7955973  | 7958500  | GeneBound  | R.KKTKEEA   | 0.999942 | 2 | FALSE | 2 |
| chrV   | 8902317  | 8905401  | NovelExon  | R.TRFELVSC  | 0.99595  | 1 | TRUE  | 1 |
| chrV   | 19119494 | 19124879 | ReverseStr | R.KMGALSM   | 0.999914 | 2 | FALSE | 2 |
| chrII  | 10686296 | 10690347 | ReverseStr | R.RKTDLGL   | 0.999986 | 2 | FALSE | 2 |
| chrII  | 3429409  | 3431308  | NovelExon  | K.IGRKSSTM  | 1        | 1 | TRUE  | 1 |
| chrX   | 8325053  | 8326400  | FrameShift | K.TKPYLKM   | 0.99449  | 1 | TRUE  | 1 |
| chrI   | 511051   | 516459   | ReverseStr | _.EFPPPIN   | 0.999993 | 2 | TRUE  | 2 |
| chrV   | 8133410  | 8134963  | ReverseStr | K.QRSRPVII  | 1        | 3 | FALSE | 3 |
| chrII  | 9333955  | 9338838  | GeneBound  | R.AISIASSR  | 1        | 6 | FALSE | 6 |
| chrIV  | 5364551  | 5366746  | GeneBound  | _.LVYFLCRI  | 0.999957 | 2 | FALSE | 2 |
| chrX   | 17135936 | 17138038 | ReverseStr | R.KNASVNC   | 0.999962 | 2 | FALSE | 2 |
| chrIII | 856629   | 860081   | FrameShift | _.MYSSKKM   | 0.996261 | 1 | TRUE  | 1 |
| chrII  | 10197566 | 10198265 | FrameShift | K.LINQDSEI  | 0.996917 | 1 | TRUE  | 1 |
| chrI   | 2489978  | 2497385  | ExonBound  | K.NRFFQKS   | 0.995592 | 1 | TRUE  | 1 |
| chrIII | 3070515  | 3085263  | NovelExon  | K.LPKFEDFI  | 0.996442 | 1 | TRUE  | 1 |
| chrI   | 14004477 | 14008459 | GeneBound  | R.LTAIDSA/  | 1        | 5 | FALSE | 5 |
| chrIV  | 4390846  | 4393449  | FrameShift | _.TCSRRH    | 0.99988  | 1 | TRUE  | 1 |
| chrV   | 19995956 | 20004456 | ReverseStr | K.LGLGLGL   | 0.999998 | 3 | TRUE  | 2 |
| chrIV  | 14071350 | 14076719 | FrameShift | L.FLNSNRIS  | 0.997199 | 1 | TRUE  | 1 |
| chrIII | 1508787  | 1517985  | ExonBound  | K.FKYKQVL   | 0.995783 | 1 | TRUE  | 1 |
| chrI   | 1211495  | 1254700  | NovelExon  | K.KCQKILEI  | 0.994785 | 1 | TRUE  | 1 |
| chrV   | 14518340 | 14519355 | ExonBound  | G.DEALKFL   | 0.994062 | 1 | TRUE  | 1 |
| chrX   | 17680835 | 17682218 | ReverseStr | K.FEKKESE   | 1        | 3 | FALSE | 3 |
| chrV   | 3777371  | 3784658  | NovelExon  | _.KIIKFKLS/ | 0.999574 | 1 | TRUE  | 1 |
| chrIV  | 11116552 | 11118866 | ReverseStr | R.LAFLSFFR  | 0.999985 | 3 | TRUE  | 2 |
| chrIV  | 16070814 | 16073183 | NovelGene  | L.KMFLTVL   | 0.999915 | 2 | FALSE | 2 |
| chrX   | 12503893 | 12513979 | ReverseStr | K.LKYSNFAI  | 0.999953 | 2 | TRUE  | 2 |
| chrIII | 5564985  | 5566967  | GeneBound  | R.EMVFFFS   | 0.999997 | 4 | FALSE | 2 |
| chrII  | 13888585 | 13898503 | GeneBound  | R.KLKKKILK  | 1        | 3 | FALSE | 3 |
| chrIV  | 3342513  | 3350015  | ReverseStr | L.YFACIRKK  | 0.999976 | 2 | TRUE  | 2 |
| chrI   | 14665168 | 14674811 | NovelExon  | K.INVSKNLI  | 0.994741 | 1 | TRUE  | 1 |
| chrII  | 2460851  | 2472867  | ReverseStr | K.PSIWIEA   | 0.999961 | 2 | TRUE  | 2 |
| chrIII | 13307401 | 13313292 | NovelExon  | _.FLKNLKN   | 0.998966 | 1 | TRUE  | 1 |
| chrII  | 9939160  | 9940278  | NovelExon  | K.MLYNCFY   | 0.999012 | 1 | TRUE  | 1 |
| chrIV  | 11101941 | 11102674 | GeneBound  | R.RREMLKE   | 0.999992 | 2 | FALSE | 2 |
| chrIV  | 559238   | 568076   | GeneBound  | K.TLFLKYN   | 0.999958 | 2 | FALSE | 2 |
| chrI   | 9876960  | 9879110  | GeneBound  | K.TTVKTITS  | 0.999979 | 2 | FALSE | 2 |
| chrX   | 1132996  | 1148340  | FrameShift | R.LDREFNP   | 0.997978 | 1 | TRUE  | 1 |
| chrX   | 1247733  | 1249833  | ReverseStr | R.LPTYVPA   | 0.999956 | 2 | TRUE  | 2 |
| chrX   | 7888666  | 7889717  | ReverseStr | K.NVSSPFSI  | 0.999952 | 2 | FALSE | 2 |
| chrV   | 8126643  | 8129332  | GeneBound  | R.KVEEETKI  | 0.999997 | 2 | FALSE | 2 |
| chrX   | 17601533 | 17609972 | ReverseStr | A.ESFKFLFL  | 0.999981 | 2 | TRUE  | 2 |
| chrV   | 12494710 | 12497736 | ReverseStr | _.MNIRKN    | 0.999993 | 2 | TRUE  | 2 |
| chrIII | 3068302  | 3069192  | Translated | _.EGLHHPK   | 1        | 4 | TRUE  | 4 |
| chrX   | 4710143  | 4711715  | GeneBound  | K.NNMNTK    | 0.999952 | 2 | FALSE | 2 |

|        |          |          |            |             |          |    |       |    |
|--------|----------|----------|------------|-------------|----------|----|-------|----|
| chrIV  | 5369798  | 5374662  | ExonBound  | R.NENQSCF   | 0.995175 | 1  | TRUE  | 1  |
| chrI   | 1394571  | 1402944  | NovelExon  | K.LKFSIFGIH | 0.997806 | 1  | TRUE  | 1  |
| chrII  | 3949403  | 3951346  | ReverseStr | R.ASTLGHY   | 1        | 3  | TRUE  | 3  |
| chrX   | 4834840  | 4853035  | ReverseStr | K.WAMPEN    | 1        | 3  | TRUE  | 3  |
| chrII  | 11465875 | 11467577 | FrameShift | R.ILVMLPKI  | 0.997982 | 1  | TRUE  | 1  |
| chrX   | 10181079 | 10194317 | NovelExon  | K.RASGWA    | 0.998059 | 1  | TRUE  | 1  |
| chrIV  | 6147528  | 6149916  | ReverseStr | K.RKWKHQ    | 0.999924 | 2  | TRUE  | 2  |
| chrX   | 6684425  | 6690086  | ExonBound  | _.KYAEINVI  | 0.995321 | 1  | TRUE  | 1  |
| chrX   | 15689390 | 15696355 | FrameShift | R.RKTPFCK   | 0.998081 | 1  | TRUE  | 1  |
| chrI   | 14642722 | 14646595 | NovelExon  | R.SNCNGT/   | 1        | 1  | TRUE  | 1  |
| chrII  | 3282657  | 3287156  | GeneBound  | _.ITVDTGD   | 1        | 3  | FALSE | 3  |
| chrV   | 13622093 | 13624513 | FrameShift | _.SSEITSSR  | 0.999587 | 1  | TRUE  | 1  |
| chrII  | 4461131  | 4467895  | NovelExon  | K.KKTKNCL   | 0.994697 | 1  | TRUE  | 1  |
| chrV   | 18389252 | 18391249 | GeneBound  | K.KNWLIVR   | 0.999953 | 2  | FALSE | 2  |
| chrII  | 3749072  | 3750722  | ReverseStr | R.IFNNDLN   | 0.999976 | 2  | TRUE  | 2  |
| chrX   | 15149493 | 15153699 | NovelGene  | K.QMFPCSI   | 1        | 3  | FALSE | 3  |
| chrIV  | 2161476  | 2164870  | FrameShift | _.NLPKVQF   | 0.994127 | 1  | TRUE  | 1  |
| chrIII | 6972155  | 6973667  | GeneBound  | K.SGDAGIV   | 1        | 44 | FALSE | 16 |
| chrII  | 51652    | 57607    | FrameShift | R.QEVQRAI   | 0.998135 | 1  | TRUE  | 1  |
| chrIV  | 11603589 | 11604901 | ReverseStr | _.HGPETSC   | 0.999998 | 2  | FALSE | 2  |
| chrV   | 15316480 | 15318408 | FrameShift | R.VLLSKIAK  | 0.994195 | 1  | TRUE  | 1  |
| chrX   | 372236   | 376974   | ExonBound  | K.ILKFLMSK  | 0.999361 | 1  | TRUE  | 1  |
| chrIII | 4015892  | 4017606  | ReverseStr | L.PMILLLLL  | 1        | 8  | TRUE  | 5  |
| chrII  | 9178453  | 9188420  | ReverseStr | K.NQAIQNI   | 0.999943 | 2  | TRUE  | 2  |
| chrX   | 14876096 | 14878650 | FrameShift | K.WSLHENI   | 0.99626  | 1  | TRUE  | 1  |
| chrII  | 4891575  | 4893569  | ReverseStr | R.MVLLSNS   | 1        | 3  | TRUE  | 3  |
| chrII  | 3915950  | 3916570  | NovelGene  | R.FKLSNFLT  | 0.999983 | 2  | FALSE | 2  |
| chrI   | 4805608  | 4809675  | FrameShift | R.ISSTGASE  | 0.996944 | 1  | TRUE  | 1  |
| chrIV  | 2891555  | 2892495  | GeneBound  | K.LFLKTILG  | 0.999997 | 3  | FALSE | 2  |
| chrI   | 7867572  | 7867913  | ReverseStr | _.GKFDLSI   | 1        | 4  | TRUE  | 4  |
| chrIII | 12671293 | 12673322 | ReverseStr | K.WPNPKC    | 0.999979 | 2  | FALSE | 2  |
| chrIV  | 2358931  | 2376115  | GeneBound  | K.MAKNIQI   | 1        | 3  | FALSE | 3  |
| chrIV  | 15455122 | 15471456 | NovelExon  | K.KLLKGGL   | 0.996831 | 1  | TRUE  | 1  |
| chrIV  | 764072   | 769386   | Translated | K.KRKKSGA   | 0.99999  | 2  | TRUE  | 2  |
| chrII  | 1321048  | 1323086  | NovelExon  | K.HRQKREV   | 0.994627 | 1  | TRUE  | 1  |
| chrIII | 12987571 | 12992391 | FrameShift | R.LIYHSSDF  | 0.997312 | 1  | TRUE  | 1  |
| chrV   | 2898434  | 2899965  | ReverseStr | R.IDTQKSN   | 0.999999 | 2  | TRUE  | 2  |
| chrIII | 11485374 | 11487247 | GeneBound  | _.LVFGDAE   | 1        | 3  | FALSE | 3  |
| chrIII | 5943779  | 5946080  | ReverseStr | T.FDLAGKC   | 1        | 14 | FALSE | 5  |
| chrI   | 10072571 | 10074376 | GeneBound  | K.TTWRISG   | 0.999959 | 2  | FALSE | 2  |
| chrIII | 12434310 | 12435122 | GeneBound  | K.KFWISSTI  | 1        | 3  | FALSE | 3  |
| chrX   | 7823603  | 7825709  | NovelExon  | K.SGDAGIV   | 1        | 2  | TRUE  | 2  |
| chrX   | 11109384 | 11115775 | ExonBound  | _.YLSGSGN   | 0.995785 | 1  | TRUE  | 1  |
| chrX   | 5841557  | 5845953  | FrameShift | K.LGICTPNI  | 0.997114 | 1  | TRUE  | 1  |
| chrV   | 8502427  | 8504570  | NovelExon  | K.SVDLVDT   | 0.997003 | 1  | TRUE  | 1  |
| chrII  | 12185943 | 12189206 | FrameShift | _.LKKKNHR   | 0.998188 | 1  | TRUE  | 1  |
| chrIII | 4618842  | 4643271  | NovelExon  | N.LPTSKPG   | 0.996427 | 1  | TRUE  | 1  |

|        |          |          |             |            |          |   |       |   |
|--------|----------|----------|-------------|------------|----------|---|-------|---|
| chrIII | 190983   | 191980   | GeneBounc   | R.LNFPEFSI | 0.999944 | 2 | FALSE | 2 |
| chrIII | 9260111  | 9268982  | ReverseStr  | R.EPTNHM   | 0.99993  | 2 | TRUE  | 2 |
| chrV   | 14999698 | 15000009 | GeneBounc   | Q.KFNNGK   | 1        | 3 | FALSE | 3 |
| chrIV  | 13048472 | 13049811 | FrameShift  | R.YPFQCSS  | 0.99854  | 1 | TRUE  | 1 |
| chrIII | 1197438  | 1202000  | ReverseStr  | R.KNRRKNC  | 1        | 3 | TRUE  | 3 |
| chrIV  | 14327135 | 14327242 | NovelGene   | R.EWRPRP   | 0.999919 | 2 | FALSE | 2 |
| chrIV  | 17154731 | 17157774 | NovelGene   | R.GRQAGG   | 0.999999 | 2 | FALSE | 2 |
| chrII  | 3961692  | 3972141  | FrameShift  | R.RTAVDLS  | 0.996866 | 1 | TRUE  | 1 |
| chrII  | 2177740  | 2181980  | ReverseStr  | R.RHSSPQL  | 0.999962 | 2 | TRUE  | 2 |
| chrV   | 8751862  | 8752992  | GeneBounc   | K.FMILSAYI | 0.999985 | 2 | FALSE | 2 |
| chrIII | 1215968  | 1222064  | ReverseStr  | R.RWMRRI   | 0.999929 | 2 | FALSE | 2 |
| chrX   | 15369929 | 15377616 | ExonBounc   | R.ARQFISIS | 0.995148 | 1 | TRUE  | 1 |
| chrII  | 7533252  | 7534466  | ReverseStr  | I.WTNMAR   | 1        | 4 | TRUE  | 3 |
| chrX   | 4984047  | 4993205  | ExonBounc   | K.SISFSSPD | 0.999223 | 1 | TRUE  | 1 |
| chrII  | 13311146 | 13320841 | NovelExon   | K.KSQIKNEI | 0.995602 | 1 | TRUE  | 1 |
| chrV   | 10453843 | 10457324 | FrameShift  | K.SRILCRFH | 0.99737  | 1 | TRUE  | 1 |
| chrIV  | 10368586 | 10373115 | ExonBounc   | R.FVKKHVT  | 0.997762 | 1 | TRUE  | 1 |
| chrIII | 9327224  | 9329283  | GeneBounc   | R.KQHVEI   | 0.999985 | 2 | FALSE | 2 |
| chrV   | 19436570 | 19437188 | NovelSplice | K.AKEMSEC  | 0.996401 | 1 | TRUE  | 1 |
| chrX   | 7823603  | 7825709  | NovelExon   | _.TLLEALDS | 0.998068 | 1 | TRUE  | 1 |
| chrIV  | 17079714 | 17087344 | ReverseStr  | R.KIMGGGI  | 0.999995 | 2 | FALSE | 2 |
| chrIV  | 5111678  | 5112867  | ReverseStr  | K.KSGQQIN  | 0.999945 | 2 | FALSE | 2 |
| chrII  | 342137   | 347865   | GeneBounc   | K.DKMKSKI  | 1        | 3 | FALSE | 3 |
| chrIII | 860188   | 861289   | GeneBounc   | _.MYSSKKM  | 0.999969 | 2 | FALSE | 2 |
| chrI   | 11634604 | 11636833 | ExonBounc   | K.RCEEPDH  | 0.995458 | 1 | TRUE  | 1 |
| chrX   | 16944804 | 16947953 | ReverseStr  | R.FHRHRFH  | 0.999937 | 2 | TRUE  | 2 |
| chrV   | 8318415  | 8322843  | ReverseStr  | R.IPHSMHT  | 0.999931 | 2 | FALSE | 2 |
| chrI   | 13952149 | 13953182 | FrameShift  | _.ARTKRAS  | 0.999999 | 2 | TRUE  | 2 |
| chrII  | 1321044  | 1323094  | FrameShift  | K.HRQKREV  | 0.994627 | 1 | TRUE  | 1 |
| chrV   | 17022346 | 17022639 | ReverseStr  | _.RRVYASS  | 0.999973 | 2 | TRUE  | 2 |
| chrIII | 6082740  | 6084686  | ExonBounc   | K.LIFNFSAM | 0.995513 | 1 | TRUE  | 1 |
| chrIII | 3499358  | 3502534  | GeneBounc   | R.KKNPSKS  | 0.999977 | 2 | FALSE | 2 |
| chrII  | 4186669  | 4208502  | NovelExon   | K.EKSVDSV  | 0.994972 | 1 | TRUE  | 1 |
| chrX   | 17670953 | 17680714 | FrameShift  | R.LLECQAR  | 0.996902 | 1 | TRUE  | 1 |
| chrIII | 765191   | 771362   | FrameShift  | K.FQVISSEV | 0.998254 | 1 | TRUE  | 1 |
| chrV   | 3768556  | 3769762  | GeneBounc   | K.KIHKLPKM | 0.999946 | 2 | FALSE | 2 |
| chrV   | 627107   | 627651   | FrameShift  | R.TMPKDLF  | 0.995854 | 1 | TRUE  | 1 |
| chrII  | 1063289  | 1063934  | NovelGene   | R.KNSGAKL  | 0.999962 | 2 | FALSE | 2 |
| chrX   | 6929220  | 6932318  | FrameShift  | R.VAVMGK   | 0.995074 | 1 | TRUE  | 1 |
| chrIV  | 11086069 | 11092531 | ReverseStr  | R.FCLAGDL  | 0.999963 | 2 | TRUE  | 2 |
| chrIII | 12283107 | 12303115 | NovelExon   | Q.KCGFAKF  | 1        | 1 | TRUE  | 1 |
| chrIII | 6592514  | 6601118  | NovelExon   | R.YYSHNK   | 0.995588 | 1 | TRUE  | 1 |
| chrV   | 4431749  | 4432089  | ExonBounc   | K.KKGRTVE  | 0.996585 | 1 | TRUE  | 1 |
| chrIII | 344314   | 348608   | FrameShift  | R.SSNRFCG  | 0.999382 | 1 | TRUE  | 1 |
| chrIII | 13119719 | 13133829 | ReverseStr  | _.ESSNTCT  | 0.999924 | 2 | TRUE  | 2 |
| chrI   | 5549140  | 5550508  | ReverseStr  | R.SFREKSTC | 0.999978 | 2 | TRUE  | 2 |
| chrI   | 1157572  | 1162903  | GeneBounc   | _.GLDVDHL  | 1        | 3 | FALSE | 3 |

|        |          |          |                         |          |    |       |   |
|--------|----------|----------|-------------------------|----------|----|-------|---|
| chrX   | 11028901 | 11040539 | ReverseStr: R.VQWREG    | 0.999988 | 2  | TRUE  | 2 |
| chrIII | 4553614  | 4559894  | NovelExon K.SFDTTMK     | 0.995009 | 1  | TRUE  | 1 |
| chrI   | 535794   | 536673   | FrameShift K.EADNDIV    | 0.99948  | 1  | TRUE  | 1 |
| chrII  | 6349175  | 6351955  | ReverseStr: R.HNIWKIR   | 1        | 6  | TRUE  | 4 |
| chrI   | 17483    | 26781    | ReverseStr: R.RCDGSSC   | 1        | 4  | TRUE  | 4 |
| chrIV  | 1052511  | 1054796  | ExonBounc F.FQFISAIA    | 0.998682 | 1  | TRUE  | 1 |
| chrI   | 10291885 | 10297913 | ReverseStr: _.AESLSYG/  | 1        | 3  | TRUE  | 3 |
| chrII  | 1663803  | 1665771  | FrameShift K.ARSYDGS    | 0.995352 | 1  | TRUE  | 1 |
| chrV   | 20787385 | 20787592 | ReverseStr: R.ILCASRAF  | 0.999938 | 2  | TRUE  | 2 |
| chrV   | 11740874 | 11754181 | ReverseStr: R.KKYGGGC   | 0.999981 | 2  | TRUE  | 2 |
| chrIV  | 9858468  | 9862098  | NovelExon R.ASAEMF/     | 0.999627 | 1  | TRUE  | 1 |
| chrIII | 2805423  | 2810994  | NovelExon K.KFKNLRK     | 0.996086 | 1  | TRUE  | 1 |
| chrIV  | 7982514  | 7983888  | FrameShift _.RFRQQAC    | 1        | 1  | TRUE  | 1 |
| chrV   | 6098976  | 6100536  | ReverseStr: R.QGLLQQI   | 1        | 17 | TRUE  | 5 |
| chrIV  | 14796574 | 14797458 | ReverseStr: K.LAMFLMI   | 0.999994 | 2  | TRUE  | 2 |
| chrIII | 2102285  | 2107460  | NovelExon _.ESTEMGL     | 0.999137 | 1  | TRUE  | 1 |
| chrV   | 9680351  | 9685635  | GeneBounc K.MLKGQ       | 0.999952 | 2  | FALSE | 2 |
| chrII  | 15233077 | 15244883 | FrameShift R.MIASARL    | 0.995435 | 1  | TRUE  | 1 |
| chrV   | 6793919  | 6795113  | FrameShift T.ENNKLSK    | 0.998421 | 1  | TRUE  | 1 |
| chrV   | 4648818  | 4650606  | FrameShift R.RVRMWM     | 0.999505 | 1  | TRUE  | 1 |
| chrII  | 15179895 | 15183156 | NovelExon R.QTGKPA      | 0.994604 | 1  | TRUE  | 1 |
| chrII  | 13533475 | 13541001 | NovelExon K.NFFIKILIK   | 0.994476 | 1  | TRUE  | 1 |
| chrII  | 11465641 | 11468589 | GeneBounc K.LLFHQSK     | 1        | 4  | FALSE | 4 |
| chrII  | 14600827 | 14610476 | NovelExon K.FVGNQA      | 0.999676 | 1  | TRUE  | 1 |
| chrV   | 9691013  | 9692135  | ReverseStr: R.SSNCDCS   | 1        | 3  | TRUE  | 3 |
| chrII  | 6306398  | 6308042  | FrameShift K.WYRPDD     | 0.997867 | 1  | TRUE  | 1 |
| chrV   | 6390447  | 6392454  | GeneBounc K.RTWRRG      | 0.999961 | 2  | FALSE | 2 |
| chrX   | 6479601  | 6484773  | ReverseStr: R.QLFGGG\   | 0.999997 | 2  | TRUE  | 2 |
| chrI   | 8623011  | 8631178  | FrameShift K.QSTMFR     | 0.996274 | 1  | TRUE  | 1 |
| chrIV  | 2619873  | 2625503  | NovelExon K.FDNKILT     | 0.996567 | 1  | TRUE  | 1 |
| chrII  | 5056220  | 5058105  | ReverseStr: Q.EPVEDGI   | 1        | 3  | FALSE | 3 |
| chrX   | 8534617  | 8535053  | ReverseStr: K.TFISSKEL  | 0.999985 | 2  | FALSE | 2 |
| chrI   | 13274100 | 13276451 | FrameShift R.ESPQIML    | 0.99461  | 1  | TRUE  | 1 |
| chrIII | 3195552  | 3198352  | NovelExon _.AEIQAFK\    | 0.998923 | 1  | TRUE  | 1 |
| chrIII | 1905958  | 1939562  | ReverseStr: _.ILSSKFKYI | 0.999982 | 3  | TRUE  | 2 |
| chrV   | 1475086  | 1479581  | FrameShift R.AVVLEPA    | 0.997236 | 1  | TRUE  | 1 |
| chrX   | 6958146  | 6958383  | NovelGene K.INGTEKN     | 0.999997 | 2  | FALSE | 2 |
| chrIV  | 10504977 | 10506170 | NovelGene R.AQCASFL     | 1        | 2  | FALSE | 2 |
| chrX   | 8228017  | 8231880  | NovelExon R.KSVIPGIR    | 0.99438  | 1  | TRUE  | 1 |
| chrII  | 13741673 | 13749911 | NovelExon _.TSRPQNF     | 0.997749 | 1  | TRUE  | 1 |
| chrX   | 9409755  | 9427192  | FrameShift R.KEKRREG    | 0.996735 | 1  | TRUE  | 1 |
| chrX   | 7823603  | 7825718  | ReverseStr: V.RGDLKH\   | 1        | 3  | TRUE  | 3 |
| chrIV  | 11924619 | 11925328 | ReverseStr: _.DVSFCKI   | 1        | 3  | TRUE  | 3 |
| chrIII | 11710727 | 11718549 | ReverseStr: K.NTSEIFSK  | 0.999956 | 2  | TRUE  | 2 |
| chrII  | 2137466  | 2138995  | ReverseStr: R.RRVKITK\  | 0.999991 | 2  | TRUE  | 2 |
| chrX   | 17236859 | 17237781 | ReverseStr: K.FTHFVKS   | 0.999954 | 2  | FALSE | 2 |
| chrI   | 2621957  | 2623272  | NovelExon K.LCVETGV     | 0.996563 | 1  | TRUE  | 1 |



|        |          |          |                         |          |   |       |   |
|--------|----------|----------|-------------------------|----------|---|-------|---|
| chrV   | 9343476  | 9343935  | ReverseStr: R.TGMIFGS   | 0.999998 | 4 | FALSE | 2 |
| chrII  | 5600925  | 5602925  | FrameShift K.KEKRRIRI   | 0.994654 | 1 | TRUE  | 1 |
| chrX   | 5165364  | 5168749  | ReverseStr: P.RHIYDIGF  | 0.999995 | 3 | FALSE | 2 |
| chrI   | 9638877  | 9641727  | ExonBounc R.NAENIRIS    | 0.995569 | 1 | TRUE  | 1 |
| chrV   | 18967875 | 18969588 | NovelExon _._ESMENK\    | 0.998136 | 1 | TRUE  | 1 |
| chrII  | 7846437  | 7847614  | GeneBounc K.RSVDKCG     | 0.999943 | 2 | FALSE | 2 |
| chrX   | 6178209  | 6178702  | ReverseStr: K.KEPCKTLI  | 0.999999 | 2 | FALSE | 2 |
| chrI   | 47472    | 49819    | FrameShift R.NIGKAM/    | 0.999282 | 1 | TRUE  | 1 |
| chrIV  | 4724854  | 4725305  | ReverseStr: R.QRWWL     | 0.999979 | 2 | FALSE | 2 |
| chrIII | 9759033  | 9760304  | GeneBounc _._QKVFPQ     | 0.999949 | 2 | FALSE | 2 |
| chrIII | 9185999  | 9192905  | NovelExon R.RAINVKA     | 1        | 1 | TRUE  | 1 |
| chrX   | 16315356 | 16317659 | NovelExon K.ERTDKKK     | 0.99764  | 1 | TRUE  | 1 |
| chrI   | 9644396  | 9644763  | GeneBounc K.KRKTDRK     | 1        | 3 | FALSE | 3 |
| chrX   | 17402731 | 17413776 | NovelExon K.IRDLEKIFI   | 0.995199 | 1 | TRUE  | 1 |
| chrIV  | 13031570 | 13034091 | GeneBounc R.WEDLPIN     | 0.999986 | 3 | FALSE | 2 |
| chrIII | 12240302 | 12250063 | NovelExon K.KFFFLKFL    | 0.998921 | 1 | TRUE  | 1 |
| chrII  | 15233077 | 15244883 | NovelExon R.MIASARL     | 0.995435 | 1 | TRUE  | 1 |
| chrII  | 2748593  | 2751578  | ReverseStr: K.LPKNYPK   | 0.99996  | 2 | TRUE  | 2 |
| chrIV  | 8852485  | 8862474  | FrameShift R.QRLLKQ     | 0.9977   | 1 | TRUE  | 1 |
| chrIV  | 6582676  | 6585560  | ReverseStr: R.EMNNLN    | 0.999951 | 2 | TRUE  | 2 |
| chrIV  | 315053   | 320576   | ExonBounc K.FICETESE    | 0.994871 | 1 | TRUE  | 1 |
| chrX   | 11420407 | 11433459 | ReverseStr: K.LHGCFHF   | 0.999924 | 2 | TRUE  | 2 |
| chrX   | 6619874  | 6627951  | FrameShift R.GGLWSA     | 0.994751 | 1 | TRUE  | 1 |
| chrV   | 4973300  | 4974763  | ReverseStr: R.VSSGFAK   | 0.999996 | 2 | FALSE | 2 |
| chrIV  | 7083683  | 7084673  | GeneBounc K.FSKRYICI    | 0.999938 | 2 | FALSE | 2 |
| chrIV  | 334803   | 337178   | NovelExon K.FFSILQNS    | 0.996461 | 1 | TRUE  | 1 |
| chrV   | 1223898  | 1235446  | ReverseStr: K.KTNWML    | 0.999975 | 2 | TRUE  | 2 |
| chrII  | 10932728 | 10935177 | ReverseStr: K.RDPNGSF   | 0.999974 | 2 | TRUE  | 2 |
| chrV   | 16190765 | 16192242 | ReverseStr: R.FKGGAPK   | 0.999963 | 2 | FALSE | 2 |
| chrIV  | 12773862 | 12786949 | NovelExon K.QKLHTTN     | 0.998715 | 1 | TRUE  | 1 |
| chrV   | 11586241 | 11588115 | NovelExon M.TEMGDE      | 0.994127 | 1 | TRUE  | 1 |
| chrI   | 5401811  | 5402896  | GeneBounc R.EIKLFDVK    | 0.999976 | 2 | FALSE | 2 |
| chrIII | 11326555 | 11343008 | NovelExon K.KKKSGSA     | 0.995845 | 1 | TRUE  | 1 |
| chrV   | 5866117  | 5867935  | GeneBounc K.IEFKFSSH    | 0.999998 | 2 | FALSE | 2 |
| chrII  | 9931786  | 9934384  | FrameShift K.FDPELLS    | 0.999026 | 1 | TRUE  | 1 |
| chrX   | 15270862 | 15273688 | ReverseStr: R.LNIAMN\   | 1        | 3 | TRUE  | 3 |
| chrX   | 6053065  | 6057311  | FrameShift R.MIFSLDP    | 0.997226 | 2 | TRUE  | 1 |
| chrV   | 15354982 | 15357555 | GeneBounc R.RDEVDF      | 0.999966 | 2 | FALSE | 2 |
| chrII  | 7359918  | 7363202  | GeneBounc K.RKETQRE     | 0.99997  | 3 | FALSE | 2 |
| chrV   | 16224314 | 16225520 | GeneBounc R.WGTSRPI     | 1        | 3 | FALSE | 3 |
| chrII  | 6679511  | 6682937  | FrameShift R.FSYVCGC    | 0.996391 | 1 | TRUE  | 1 |
| chrII  | 3346748  | 3347522  | GeneBounc K.QTQTKES     | 0.999944 | 2 | FALSE | 2 |
| chrV   | 8272365  | 8274027  | FrameShift R.IPLPLEPS   | 0.994721 | 1 | TRUE  | 1 |
| chrIV  | 13779312 | 13782362 | GeneBounc K.FNAIVLKF    | 0.999992 | 2 | FALSE | 2 |
| chrIV  | 7304863  | 7308339  | NovelExon M.KKINNHI     | 0.995134 | 1 | TRUE  | 1 |
| chrV   | 15498725 | 15511403 | NovelExon R.IQSVRCV     | 0.996436 | 1 | TRUE  | 1 |
| chrI   | 4968008  | 4970246  | ReverseStr: K.SIYGLEISF | 0.999946 | 2 | FALSE | 2 |

|        |          |          |             |            |          |   |       |   |
|--------|----------|----------|-------------|------------|----------|---|-------|---|
| chrIII | 9060165  | 9071683  | NovelExon   | K.KYWSSTF  | 0.996622 | 1 | TRUE  | 1 |
| chrV   | 19519895 | 19533080 | NovelExon   | K.KQETDKT  | 0.997851 | 1 | TRUE  | 1 |
| chrV   | 3606805  | 3610914  | ReverseStr: | K.QETTPAIF | 0.999979 | 2 | TRUE  | 2 |
| chrIV  | 17461872 | 17463121 | ReverseStr: | K.FFFLAQN  | 0.999922 | 2 | TRUE  | 2 |
| chrV   | 11226435 | 11228685 | ReverseStr: | R.NGAPPSC  | 1        | 2 | TRUE  | 2 |
| chrII  | 5634510  | 5636908  | ReverseStr: | K.KNFLNFS  | 0.999997 | 2 | FALSE | 2 |
| chrV   | 9816666  | 9817838  | FrameShift  | K.LKIFFFDL | 0.998976 | 1 | TRUE  | 1 |
| chrII  | 7551895  | 7553858  | ReverseStr: | K.KMDQIM   | 0.999984 | 2 | FALSE | 2 |
| chrV   | 2078463  | 2081983  | NovelGene   | K.LDFDLVA  | 1        | 3 | FALSE | 3 |
| chrX   | 2252504  | 2254284  | NovelGene   | I.MAEASSF  | 0.99995  | 2 | FALSE | 2 |
| chrIV  | 5272863  | 5274148  | FrameShift  | K.EGGKEGC  | 1        | 1 | TRUE  | 1 |
| chrIII | 9739008  | 9743254  | NovelExon   | K.NSKVSKN  | 0.994823 | 1 | TRUE  | 1 |
| chrX   | 872601   | 875949   | FrameShift  | R.AAAPSGF  | 0.999436 | 1 | TRUE  | 1 |
| chrIII | 4406258  | 4407298  | FrameShift  | R.SSQSLEE  | 0.996127 | 1 | TRUE  | 1 |
| chrV   | 4336675  | 4338912  | NovelExon   | _.IDISATVA | 0.998507 | 1 | TRUE  | 1 |
| chrX   | 1018640  | 1019954  | NovelGene   | K.YNRVHF   | 1        | 5 | FALSE | 5 |
| chrIII | 7662363  | 7672088  | FrameShift  | R.FFQEDFS  | 0.99427  | 1 | TRUE  | 1 |
| chrIII | 6208324  | 6209091  | GeneBound   | R.FGFEEGS  | 1        | 5 | FALSE | 5 |
| chrV   | 20091232 | 20105658 | NovelExon   | R.LSGSGKM  | 0.997487 | 1 | TRUE  | 1 |
| chrIII | 591346   | 598114   | ExonBound   | R.MVLFLILL | 0.995423 | 1 | TRUE  | 1 |
| chrV   | 204383   | 208366   | ReverseStr: | R.KNWNFV   | 1        | 4 | TRUE  | 4 |
| chrX   | 15600999 | 15603695 | ReverseStr: | R.MPQVGS   | 0.999987 | 2 | TRUE  | 2 |
| chrX   | 12362329 | 12363042 | ReverseStr: | F.SYIHLVSI | 0.999955 | 2 | FALSE | 2 |
| chrII  | 11348366 | 11350312 | ReverseStr: | K.MQKRIFP  | 1        | 4 | TRUE  | 3 |
| chrIV  | 13880113 | 13881521 | ReverseStr: | R.MREFIGC  | 0.999968 | 2 | TRUE  | 2 |
| chrIII | 5088926  | 5090802  | NovelGene   | K.THTFLKY  | 0.999988 | 2 | FALSE | 2 |
| chrI   | 15001843 | 15005600 | ExonBound   | R.KHSPRGE  | 0.998436 | 1 | TRUE  | 1 |
| chrIV  | 13070455 | 13071246 | GeneBound   | M.KVNYELL  | 0.999989 | 2 | FALSE | 2 |
| chrIV  | 3579717  | 3580987  | FrameShift  | K.IHMSNVL  | 0.999497 | 1 | TRUE  | 1 |
| chrX   | 16581933 | 16587389 | ReverseStr: | _.KKFCMV   | 0.999991 | 2 | TRUE  | 2 |
| chrI   | 5942579  | 5945539  | ReverseStr: | K.IRLDCAH  | 0.999979 | 2 | TRUE  | 2 |
| chrIV  | 13543375 | 13548208 | FrameShift  | K.PMLSCLK  | 0.995271 | 1 | TRUE  | 1 |
| chrII  | 5168100  | 5169314  | GeneBound   | K.MQSQV    | 0.999992 | 2 | FALSE | 2 |
| chrV   | 13745690 | 13748774 | ReverseStr: | K.LSMFVTP  | 0.999937 | 2 | TRUE  | 2 |
| chrI   | 853454   | 871950   | NovelExon   | K.NNFFPNF  | 0.998349 | 1 | TRUE  | 1 |
| chrII  | 12479239 | 12480846 | ReverseStr: | _.KLPKVAV  | 0.999985 | 3 | TRUE  | 2 |
| chrX   | 12484986 | 12491034 | NovelSplice | R.DGIVGIV  | 0.995446 | 1 | TRUE  | 1 |
| chrIII | 8272885  | 8275900  | ExonBound   | K.VIVVYAA  | 0.995228 | 1 | TRUE  | 1 |
| chrII  | 4091933  | 4094351  | FrameShift  | L.GRLQPTE  | 0.995178 | 1 | TRUE  | 1 |
| chrI   | 11512812 | 11513824 | GeneBound   | _.FLNIYMP  | 0.99998  | 2 | FALSE | 2 |
| chrV   | 19510827 | 19512036 | GeneBound   | R.VFQGGH   | 0.999991 | 2 | FALSE | 2 |
| chrI   | 11206914 | 11211376 | NovelExon   | K.NFDKLRE  | 0.995154 | 1 | TRUE  | 1 |
| chrI   | 7962047  | 7972436  | NovelExon   | R.HDTPLYC  | 0.995295 | 1 | TRUE  | 1 |
| chrX   | 16103571 | 16124272 | NovelExon   | K.VIFPNSYT | 0.997809 | 1 | TRUE  | 1 |
| chrX   | 10819380 | 10838585 | ReverseStr: | K.FKILTKYS | 0.999974 | 2 | FALSE | 2 |
| chrIII | 235843   | 253375   | FrameShift  | R.VFISTPET | 0.995439 | 1 | TRUE  | 1 |
| chrII  | 10738927 | 10775002 | ReverseStr: | _.YFVSKNQ  | 1        | 3 | TRUE  | 3 |

|        |          |          |             |             |          |   |       |   |
|--------|----------|----------|-------------|-------------|----------|---|-------|---|
| chrV   | 9693037  | 9694783  | GeneBounc   | R.RSGEKCA   | 1        | 2 | FALSE | 2 |
| chrII  | 3343766  | 3344970  | GeneBounc   | R.ISKNFSM   | 1        | 3 | FALSE | 3 |
| chrII  | 3961692  | 3972141  | ReverseStr: | R.WWWHC     | 0.999949 | 2 | TRUE  | 2 |
| chrX   | 2900275  | 2903551  | NovelGene   | R.INDIAKEK  | 1        | 3 | FALSE | 3 |
| chrIII | 12131567 | 12131743 | NovelGene   | K.PKTKTKPI  | 0.999993 | 2 | FALSE | 2 |
| chrV   | 19313246 | 19316483 | ReverseStr: | _.TQIETKSC  | 1        | 2 | FALSE | 2 |
| chrII  | 12669158 | 12671556 | ReverseStr: | K.PLTGSAS'  | 1        | 3 | FALSE | 3 |
| chrX   | 11714719 | 11716446 | ReverseStr: | R.KMNAGR    | 0.999981 | 2 | FALSE | 2 |
| chrV   | 6357460  | 6362089  | ReverseStr: | R.SHKVKRL'  | 0.99999  | 2 | TRUE  | 2 |
| chrV   | 17861344 | 17870627 | NovelExon   | _.KIIEFYSKI | 0.999679 | 1 | TRUE  | 1 |
| chrV   | 10712670 | 10732402 | TranslatedI | _.RTAAHW    | 0.999946 | 2 | TRUE  | 2 |
| chrIII | 13283791 | 13292984 | ReverseStr: | K.EKMGKN    | 0.999984 | 2 | TRUE  | 2 |
| chrV   | 19332696 | 19349458 | NovelExon   | K.KAGFSKIE  | 0.997038 | 1 | TRUE  | 1 |
| chrII  | 5868826  | 5873592  | ReverseStr: | K.KNLDVYK   | 0.999956 | 2 | TRUE  | 2 |
| chrX   | 15084679 | 15088065 | ExonBounc   | K.HQKINFF   | 0.998526 | 1 | TRUE  | 1 |
| chrIV  | 1014235  | 1019558  | ReverseStr: | R.NDTRGVI   | 0.999954 | 2 | TRUE  | 2 |
| chrX   | 6430653  | 6433751  | FrameShift  | R.LTTFGCR'  | 0.99642  | 1 | TRUE  | 1 |
| chrIII | 13090406 | 13099553 | ReverseStr: | K.KNYSNSV   | 1        | 5 | TRUE  | 3 |
| chrX   | 3834283  | 3836854  | NovelGene   | K.YHNITLQ'  | 0.999985 | 2 | FALSE | 2 |
| chrIV  | 8188888  | 8198937  | ReverseStr: | K.ITFYISFLN | 0.999963 | 3 | TRUE  | 2 |
| chrIII | 5940939  | 5943787  | NovelExon   | K.TITLEVEA  | 1        | 2 | TRUE  | 1 |
| chrIII | 8099261  | 8100572  | FrameShift  | K.FGIAIHN/  | 0.996281 | 1 | TRUE  | 1 |
| chrX   | 6809065  | 6817593  | FrameShift  | K.QTFVIQL'  | 0.999099 | 1 | TRUE  | 1 |
| chrI   | 7567817  | 7571246  | ReverseStr: | R.SAPPDGF   | 0.999974 | 2 | TRUE  | 2 |
| chrIV  | 8034807  | 8035226  | NovelGene   | K.QINEKVA   | 0.99999  | 2 | FALSE | 2 |
| chrX   | 209108   | 211241   | ReverseStr: | K.QISEFSKK  | 0.999984 | 2 | TRUE  | 2 |
| chrX   | 7823603  | 7825718  | FrameShift  | K.SGDAGIV   | 0.999552 | 1 | TRUE  | 1 |
| chrIII | 6979829  | 6981733  | ExonBounc   | R.KYEEVRY   | 1        | 1 | TRUE  | 1 |
| chrV   | 5323188  | 5324600  | NovelExon   | K.KNLACPN   | 0.994667 | 1 | TRUE  | 1 |
| chrIII | 6154662  | 6157706  | ReverseStr: | K.SEFVSFNI  | 1        | 3 | TRUE  | 3 |
| chrI   | 2333328  | 2338690  | ReverseStr: | I.YSNTTNSM  | 0.999977 | 2 | TRUE  | 2 |
| chrIII | 2549918  | 2560659  | ReverseStr: | _.LDLFEYSC  | 0.999952 | 2 | TRUE  | 2 |
| chrX   | 316862   | 318400   | NovelGene   | P.DRMNRP    | 0.999994 | 2 | FALSE | 2 |
| chrX   | 6698494  | 6700787  | GeneBounc   | R.KDAVFM    | 1        | 5 | FALSE | 3 |
| chrI   | 8779731  | 8785409  | ReverseStr: | E.KMVNEQ    | 0.999932 | 2 | TRUE  | 2 |
| chrIII | 5294581  | 5298313  | ReverseStr: | K.QDFWTK    | 0.999978 | 2 | FALSE | 2 |
| chrI   | 14760637 | 14768969 | ReverseStr: | _.SITASPAF  | 0.999971 | 2 | FALSE | 2 |
| chrIII | 11334741 | 11342145 | FrameShift  | R.YKLFLVEC  | 0.997189 | 1 | TRUE  | 1 |
| chrX   | 13371470 | 13376923 | ReverseStr: | _.KNPITAIT  | 0.999983 | 2 | TRUE  | 2 |
| chrX   | 9703577  | 9704304  | NovelGene   | K.KMYNDIK   | 0.999993 | 2 | FALSE | 2 |
| chrV   | 8126643  | 8129332  | ExonBounc   | R.KRSSSGE'  | 0.997822 | 1 | TRUE  | 1 |
| chrX   | 17679419 | 17680714 | GeneBounc   | R.LLECQAR   | 0.999976 | 2 | FALSE | 2 |
| chrIV  | 461112   | 481167   | ReverseStr: | K.SLSGSKT'  | 0.999979 | 2 | TRUE  | 2 |
| chrV   | 16224314 | 16225520 | FrameShift  | K.MIKWISS   | 0.998616 | 1 | TRUE  | 1 |
| chrI   | 6570088  | 6572601  | FrameShift  | R.CSRQHRT   | 0.999541 | 1 | TRUE  | 1 |
| chrII  | 14150974 | 14154298 | ReverseStr: | K.SSKNVEV   | 1        | 7 | TRUE  | 4 |
| chrII  | 9528720  | 9529802  | FrameShift  | I.NIILHAIFH | 0.995517 | 1 | TRUE  | 1 |

|        |          |          |            |            |          |   |       |   |
|--------|----------|----------|------------|------------|----------|---|-------|---|
| chrIV  | 1784046  | 1785987  | NovelGene  | K.KNTADTL  | 0.999981 | 2 | FALSE | 2 |
| chrIII | 6690954  | 6703943  | GeneBound  | K.NSENRAI  | 0.999969 | 2 | FALSE | 2 |
| chrI   | 6550534  | 6552647  | FrameShift | R.RCIRYHS  | 0.995731 | 1 | TRUE  | 1 |
| chrII  | 2422212  | 2425348  | FrameShift | R.WIDCFLL  | 0.995533 | 1 | TRUE  | 1 |
| chrI   | 14297277 | 14298314 | GeneBound  | K.RASGKSC  | 0.999995 | 2 | FALSE | 2 |
| chrI   | 13309983 | 13310704 | ReverseStr | I.SSSFENKL | 0.999953 | 2 | TRUE  | 2 |
| chrIV  | 6472145  | 6473224  | ReverseStr | K.KDEGEKK  | 1        | 3 | FALSE | 3 |
| chrX   | 12289911 | 12293199 | FrameShift | K.VCIEFEEP | 0.997483 | 1 | TRUE  | 1 |
| chrX   | 9569322  | 9573666  | FrameShift | _QLVYFEEI  | 0.99584  | 1 | TRUE  | 1 |
| chrIII | 11410612 | 11424563 | FrameShift | K.RLFRVLFV | 0.994688 | 1 | TRUE  | 1 |
| chrI   | 9085344  | 9085848  | GeneBound  | R.ENKGIRL  | 0.999994 | 2 | FALSE | 2 |
| chrIII | 778237   | 783299   | ReverseStr | R.RWTGQR   | 0.999987 | 3 | TRUE  | 2 |
| chrIII | 254534   | 264395   | GeneBound  | R.EIRRKMA  | 0.999973 | 2 | FALSE | 2 |
| chrV   | 2201580  | 2204396  | ReverseStr | _LITLAAAL  | 1        | 8 | TRUE  | 8 |
| chrV   | 9109599  | 9110997  | FrameShift | K.WTIPKYS  | 0.994397 | 1 | TRUE  | 1 |
| chrII  | 13908851 | 13915179 | NovelExon  | K.LQYLQLT  | 0.999994 | 2 | TRUE  | 2 |
| chrIV  | 4285415  | 4288425  | NovelExon  | _MKNFQK    | 0.997482 | 1 | TRUE  | 1 |
| chrII  | 12242881 | 12247546 | FrameShift | K.IDSATAVI | 0.999292 | 1 | TRUE  | 1 |
| chrX   | 9861592  | 9862897  | ExonBound  | F.TEMPLGC  | 0.99976  | 1 | TRUE  | 1 |
| chrV   | 6655534  | 6656484  | ReverseStr | R.EDWGM    | 1        | 2 | TRUE  | 2 |
| chrIII | 1765403  | 1770082  | FrameShift | R.QIFSQAM  | 0.994799 | 1 | TRUE  | 1 |
| chrV   | 3945338  | 3947029  | FrameShift | _NVARFC    | 0.998407 | 1 | TRUE  | 1 |
| chrII  | 12469310 | 12471147 | ReverseStr | K.SLTTGGLI | 0.999911 | 2 | FALSE | 2 |
| chrX   | 1923717  | 1924232  | ExonBound  | K.GKLMENI  | 0.998517 | 1 | TRUE  | 1 |
| chrIII | 1834504  | 1846751  | NovelExon  | K.ISDFCAN  | 0.994771 | 1 | TRUE  | 1 |
| chrV   | 5589636  | 5591822  | FrameShift | R.RTEIDFEC | 0.999241 | 1 | TRUE  | 1 |
| chrII  | 901939   | 903622   | FrameShift | R.HRKRKSG  | 0.994757 | 1 | TRUE  | 1 |
| chrV   | 305701   | 311536   | ReverseStr | _VFGGKID   | 0.999993 | 2 | FALSE | 2 |
| chrII  | 5005085  | 5008061  | FrameShift | R.DGRMTV   | 0.995119 | 1 | TRUE  | 1 |
| chrIV  | 7149325  | 7150678  | FrameShift | K.ERKEMTK  | 0.99998  | 2 | TRUE  | 2 |
| chrX   | 9810173  | 9822215  | FrameShift | K.KMMSLQ   | 0.997859 | 1 | TRUE  | 1 |
| chrI   | 13477247 | 13487393 | NovelExon  | R.KNFNNC   | 0.996426 | 1 | TRUE  | 1 |
| chrV   | 18191415 | 18194234 | ReverseStr | K.LEHYSHR  | 0.99997  | 2 | TRUE  | 2 |
| chrIII | 6206751  | 6208265  | ExonBound  | R.FGFEEGS  | 0.995946 | 1 | TRUE  | 1 |
| chrV   | 10922967 | 10923317 | ReverseStr | R.IESGKKS  | 0.999976 | 2 | TRUE  | 2 |
| chrX   | 2711207  | 2748107  | NovelExon  | R.RRMGSLI  | 0.99448  | 1 | TRUE  | 1 |
| chrIV  | 3584309  | 3593610  | NovelExon  | R.NSKKTK   | 0.994951 | 1 | TRUE  | 1 |
| chrIV  | 12129482 | 12135073 | NovelExon  | _YDACRRR   | 0.998375 | 1 | TRUE  | 1 |
| chrX   | 6513927  | 6514141  | NovelGene  | K.HLVEIGKI | 0.999994 | 2 | FALSE | 2 |
| chrIV  | 12591672 | 12599146 | ReverseStr | R.RYCPNAT  | 0.999964 | 2 | TRUE  | 2 |
| chrII  | 13098179 | 13116731 | NovelExon  | K.FFFEKCK  | 0.997455 | 1 | TRUE  | 1 |
| chrIV  | 11324697 | 11325200 | GeneBound  | K.NVMKNY   | 1        | 4 | FALSE | 3 |
| chrIII | 11990067 | 11999492 | FrameShift | R.IWRLLLLM | 0.994249 | 1 | TRUE  | 1 |
| chrII  | 12564120 | 12565878 | GeneBound  | R.RCNRNGI  | 1        | 3 | FALSE | 3 |
| chrIV  | 9844009  | 9844317  | FrameShift | R.TAAKPGI  | 0.996321 | 1 | TRUE  | 1 |
| chrIV  | 11482647 | 11498145 | ReverseStr | R.QTKTGGI  | 1        | 3 | TRUE  | 3 |
| chrX   | 7823603  | 7825718  | FrameShift | _RKRFGKT   | 0.998549 | 1 | TRUE  | 1 |

|        |          |          |                        |          |   |       |   |
|--------|----------|----------|------------------------|----------|---|-------|---|
| chrI   | 9126130  | 9127065  | ReverseStr:_.DSALNCD   | 0.999996 | 2 | TRUE  | 2 |
| chrII  | 11683415 | 11685225 | FrameShift K.WKSFNF    | 0.996126 | 1 | TRUE  | 1 |
| chrV   | 3691954  | 3701755  | ReverseStr: K.ARKPTQA  | 1        | 2 | TRUE  | 2 |
| chrII  | 11766709 | 11768559 | ReverseStr: R.AMLIIGF  | 0.999941 | 2 | TRUE  | 2 |
| chrX   | 2763549  | 2764824  | NovelGene _ .NKPVRKS   | 0.999984 | 2 | FALSE | 2 |
| chrIV  | 6040964  | 6074494  | NovelExon Q.KFRTEKL    | 0.994284 | 1 | TRUE  | 1 |
| chrIV  | 283647   | 287201   | FrameShift K.GKKMM     | 0.998824 | 1 | TRUE  | 1 |
| chrIII | 12203663 | 12215585 | FrameShift K.RKKIFWK   | 0.999989 | 2 | TRUE  | 2 |
| chrIII | 13463168 | 13464556 | FrameShift R.IWNPFLP   | 0.99486  | 1 | TRUE  | 1 |
| chrII  | 371131   | 374082   | NovelGene R.PLTLRRF    | 0.999993 | 2 | FALSE | 2 |
| chrIV  | 17038888 | 17039618 | ReverseStr: _ .KDRKEHS | 0.999999 | 2 | TRUE  | 2 |
| chrV   | 879794   | 881575   | ReverseStr: R.RLSKSR   | 0.999997 | 2 | FALSE | 2 |
| chrI   | 10590709 | 10593951 | FrameShift K.NSPFSIS   | 0.994171 | 1 | TRUE  | 1 |
| chrIV  | 7433537  | 7433947  | GeneBound I.ITIINTLIF  | 0.999931 | 2 | FALSE | 2 |
| chrV   | 16017951 | 16019842 | GeneBound R.INNAISIL   | 0.999981 | 2 | FALSE | 2 |
| chrIV  | 12349922 | 12355695 | ReverseStr: K.RLCSIFR  | 0.999979 | 2 | TRUE  | 2 |
| chrIV  | 8261131  | 8266441  | NovelExon C.QREEIEY    | 0.999969 | 2 | TRUE  | 2 |
| chrX   | 3716301  | 3718629  | Translated I.R.MLVSP   | 0.999966 | 2 | TRUE  | 2 |
| chrV   | 9923261  | 9924027  | FrameShift _ .RSRVMV   | 0.999979 | 2 | TRUE  | 2 |
| chrV   | 6881326  | 6891385  | NovelSplice R.STPAAE   | 1        | 1 | TRUE  | 1 |
| chrV   | 2033791  | 2035644  | ReverseStr: R.YELSDR   | 0.999945 | 2 | TRUE  | 2 |
| chrX   | 8275117  | 8283268  | FrameShift K.FTPWNT    | 0.994664 | 1 | TRUE  | 1 |
| chrV   | 4919193  | 4919567  | FrameShift R.FFVIFTT   | 0.994882 | 1 | TRUE  | 1 |
| chrI   | 14790233 | 14790928 | ExonBound R.GTSHFES    | 0.99435  | 1 | TRUE  | 1 |
| chrV   | 856850   | 858454   | FrameShift K.VIEGGVM   | 0.996274 | 1 | TRUE  | 1 |
| chrIV  | 16290422 | 16291012 | NovelGene R.ESIFGVTF   | 0.999984 | 2 | FALSE | 2 |
| chrIII | 9336794  | 9344363  | ExonBound K.KFHISGAI   | 0.998041 | 1 | TRUE  | 1 |
| chrIV  | 2788690  | 2796811  | NovelExon R.HISGQMI    | 0.99722  | 1 | TRUE  | 1 |
| chrI   | 741882   | 745457   | GeneBound K.PEQKPEP    | 0.999991 | 2 | FALSE | 2 |
| chrX   | 5101001  | 5106142  | FrameShift _ .ESEVTVN  | 0.999998 | 2 | TRUE  | 2 |
| chrIII | 12484631 | 12488238 | FrameShift R.LVWVSTF   | 0.997375 | 1 | TRUE  | 1 |
| chrII  | 6947831  | 6951258  | GeneBound K.PMKTAN     | 0.999966 | 2 | FALSE | 2 |
| chrIII | 11119697 | 11127073 | GeneBound K.KPMGFLC    | 0.999992 | 2 | FALSE | 2 |
| chrV   | 5234780  | 5237153  | GeneBound S.KFQIISILN  | 0.999999 | 3 | FALSE | 3 |
| chrII  | 10251206 | 10268115 | ReverseStr: K.FPANRQ   | 0.999971 | 2 | TRUE  | 2 |
| chrII  | 13568012 | 13574993 | NovelExon R.KLFFAHFI   | 0.999482 | 1 | TRUE  | 1 |
| chrIII | 12404031 | 12421422 | NovelExon K.CKKNRKK    | 0.994881 | 1 | TRUE  | 1 |
| chrX   | 6075474  | 6081798  | NovelExon _ .FLYQLNR   | 0.995363 | 1 | TRUE  | 1 |
| chrX   | 14885890 | 14887396 | NovelGene _ .DSVFSTA   | 0.999948 | 2 | FALSE | 2 |
| chrI   | 14237347 | 14241176 | ReverseStr: K.TKNASEK  | 1        | 3 | TRUE  | 3 |
| chrI   | 4664500  | 4665349  | ReverseStr: K.LILLMME  | 0.999972 | 2 | FALSE | 2 |
| chrV   | 7465870  | 7471190  | ExonBound K.NVTILRV    | 0.996214 | 1 | TRUE  | 1 |
| chrV   | 19384858 | 19390091 | NovelExon _ .KMGLSA    | 0.997322 | 1 | TRUE  | 1 |
| chrI   | 1837912  | 1841192  | FrameShift R.LADSLAP   | 0.998845 | 1 | TRUE  | 1 |
| chrII  | 4872093  | 4873122  | GeneBound K.TGDGERF    | 0.999979 | 2 | FALSE | 2 |
| chrX   | 16816187 | 16819195 | NovelExon S.WSPAYVF    | 0.995381 | 1 | TRUE  | 1 |
| chrIV  | 698774   | 707719   | NovelExon R.QTFVKEG    | 0.995651 | 1 | TRUE  | 1 |

|        |          |          |            |            |          |   |       |   |
|--------|----------|----------|------------|------------|----------|---|-------|---|
| chrI   | 11253342 | 11255875 | NovelExon  | R.VALHVAL  | 0.999227 | 1 | TRUE  | 1 |
| chrIII | 8356813  | 8358772  | ReverseStr | R.MVGAKA   | 0.999999 | 2 | FALSE | 2 |
| chrII  | 10639416 | 10643477 | GeneBound  | _.HRMPTY   | 0.999923 | 2 | FALSE | 2 |
| chrII  | 11052082 | 11055245 | ReverseStr | R.LSSIDILM | 1        | 3 | TRUE  | 3 |
| chrII  | 2603213  | 2605424  | ReverseStr | R.QNQKQN   | 0.999986 | 2 | TRUE  | 2 |
| chrV   | 1342790  | 1343392  | NovelGene  | R.LSAGANS  | 0.999992 | 2 | FALSE | 2 |
| chrIII | 4837699  | 4840988  | ExonBound  | K.VIFRQMK  | 0.998096 | 1 | TRUE  | 1 |
| chrIV  | 874601   | 881909   | NovelExon  | N.NFFEFSSI | 0.99628  | 1 | TRUE  | 1 |
| chrIII | 6251760  | 6271230  | NovelExon  | K.LGLTSAA  | 0.9977   | 1 | TRUE  | 1 |
| chrIV  | 10422591 | 10424617 | ReverseStr | _.SSSLGSSS | 0.999988 | 4 | TRUE  | 2 |
| chrIV  | 2688959  | 2703975  | ReverseStr | R.RLSKMD   | 0.999964 | 2 | TRUE  | 2 |
| chrV   | 12590960 | 12592463 | ReverseStr | K.WKLLLIW  | 0.999955 | 2 | FALSE | 2 |
| chrI   | 15041421 | 15050691 | ReverseStr | K.SLRGTVP  | 0.999964 | 2 | TRUE  | 2 |
| chrII  | 6684202  | 6688606  | NovelExon  | R.ADALYNF  | 1        | 1 | TRUE  | 1 |
| chrII  | 3482439  | 3490142  | NovelExon  | K.KLENFVN  | 0.996633 | 1 | TRUE  | 1 |
| chrIV  | 4487052  | 4488991  | NovelExon  | R.IMSAANF  | 0.996337 | 1 | TRUE  | 1 |
| chrV   | 16833294 | 16839049 | ReverseStr | Y.DNKFSS   | 0.999987 | 2 | TRUE  | 2 |
| chrX   | 15891944 | 15892295 | NovelGene  | V.FRNIPPP  | 0.999997 | 2 | FALSE | 2 |
| chrII  | 13406090 | 13411210 | GeneBound  | E.ILMDDTV  | 0.99997  | 2 | FALSE | 2 |
| chrV   | 3391680  | 3393291  | FrameShift | K.QKLVFNL  | 0.999968 | 2 | TRUE  | 2 |
| chrIV  | 16744833 | 16755769 | GeneBound  | _.KKNRDLC  | 1        | 4 | FALSE | 4 |
| chrV   | 5503017  | 5504840  | ReverseStr | R.ALVVNLN  | 0.999995 | 2 | TRUE  | 2 |
| chrI   | 6476803  | 6488984  | NovelExon  | H.NCLTEAT  | 0.998898 | 1 | TRUE  | 1 |
| chrV   | 10674483 | 10675591 | FrameShift | K.KMMELE   | 0.995131 | 1 | TRUE  | 1 |
| chrV   | 12527040 | 12528631 | GeneBound  | K.KLMSSTS  | 0.999937 | 2 | FALSE | 2 |
| chrX   | 10000881 | 10004881 | ExonBound  | K.TNQIVLL  | 0.995022 | 1 | TRUE  | 1 |
| chrV   | 5589636  | 5591822  | FrameShift | K.FVHYNAN  | 0.996303 | 1 | TRUE  | 1 |
| chrV   | 17029598 | 17030519 | NovelGene  | K.RNGSYPC  | 0.999929 | 2 | FALSE | 2 |
| chrI   | 5190151  | 5195249  | NovelExon  | K.LVVLYFM  | 0.995822 | 1 | TRUE  | 1 |
| chrV   | 10021508 | 10023212 | GeneBound  | K.SRYVSRIV | 1        | 3 | FALSE | 3 |
| chrIV  | 8644728  | 8645332  | GeneBound  | K.NKMDKG   | 0.999997 | 2 | FALSE | 2 |
| chrIII | 2151958  | 2197899  | NovelExon  | R.IPESTVTR | 1        | 1 | TRUE  | 1 |
| chrII  | 4481024  | 4483721  | NovelExon  | _.TLQVGM   | 0.994208 | 1 | TRUE  | 1 |
| chrV   | 15357679 | 15360721 | ReverseStr | R.EICSKHR  | 0.999966 | 2 | TRUE  | 2 |
| chrV   | 9058406  | 9059572  | ReverseStr | _.KTVKGNL  | 0.999989 | 2 | TRUE  | 2 |
| chrV   | 20579534 | 20580647 | GeneBound  | R.HVFIHHT  | 0.999998 | 4 | FALSE | 2 |
| chrV   | 5902116  | 5904829  | FrameShift | R.NMTSIHS  | 0.99517  | 1 | TRUE  | 1 |
| chrV   | 5132726  | 5137085  | FrameShift | R.IMGLLIM  | 0.995088 | 1 | TRUE  | 1 |
| chrIII | 13344836 | 13346765 | GeneBound  | _.MPIFRSV  | 0.999972 | 2 | FALSE | 2 |
| chrV   | 17417108 | 17418366 | GeneBound  | K.GFFSCQN  | 0.999971 | 2 | FALSE | 2 |
| chrIV  | 8827791  | 8840669  | GeneBound  | K.IKTTRIWH | 0.999999 | 4 | FALSE | 2 |
| chrIV  | 2887050  | 2891280  | GeneBound  | K.INWAVTI  | 1        | 2 | FALSE | 2 |
| chrIII | 1605738  | 1606821  | GeneBound  | F.NHYGKLC  | 0.999983 | 2 | FALSE | 2 |
| chrI   | 12183679 | 12188998 | ExonBound  | R.AVQNSIV  | 0.9967   | 1 | TRUE  | 1 |
| chrIV  | 10738184 | 10738638 | ReverseStr | K.TGIRFGSI | 0.999981 | 2 | TRUE  | 2 |
| chrX   | 9062779  | 9066602  | GeneBound  | _.RHFNIFF  | 0.999928 | 2 | FALSE | 2 |
| chrV   | 9645816  | 9650285  | FrameShift | R.KVQTTAN  | 0.996618 | 1 | TRUE  | 1 |

|        |          |          |            |             |          |    |       |   |
|--------|----------|----------|------------|-------------|----------|----|-------|---|
| chrI   | 11618    | 16842    | NovelExon  | _.EVGGLILL  | 0.998796 | 1  | TRUE  | 1 |
| chrX   | 5109473  | 5112347  | ReverseStr | R.SIRFTRTK  | 0.999942 | 2  | TRUE  | 2 |
| chrX   | 5489806  | 5490081  | GeneBounc  | _.QKCTEVC   | 0.999991 | 2  | FALSE | 2 |
| chrX   | 11563857 | 11569464 | ReverseStr | R.SDSMMT    | 0.999942 | 2  | FALSE | 2 |
| chrIV  | 13492547 | 13497117 | FrameShift | K.KYSIEREP  | 0.994107 | 1  | TRUE  | 1 |
| chrI   | 1162892  | 1175871  | NovelExon  | _.CDSKFSPI  | 0.995936 | 1  | TRUE  | 1 |
| chrIV  | 11480665 | 11482602 | GeneBounc  | _.PEYKYSQ   | 1        | 3  | FALSE | 3 |
| chrV   | 16747537 | 16788393 | NovelExon  | K.KFFNSEM   | 0.997374 | 1  | TRUE  | 1 |
| chrIII | 8468035  | 8478300  | ReverseStr | K.IFFQLPST  | 0.999999 | 2  | TRUE  | 2 |
| chrII  | 11232692 | 11234890 | NovelExon  | K.KTPNFAP   | 0.995165 | 1  | TRUE  | 1 |
| chrX   | 10945088 | 10948904 | ExonBounc  | K.CVDIFPEC  | 0.994962 | 1  | TRUE  | 1 |
| chrX   | 15174969 | 15176411 | GeneBounc  | C.PCKFLPAI  | 0.999997 | 2  | FALSE | 2 |
| chrIII | 1606836  | 1614024  | ReverseStr | R.FHISVPST  | 1        | 4  | TRUE  | 4 |
| chrV   | 20441584 | 20443988 | NovelGene  | K.KMIEKAN   | 0.99992  | 2  | FALSE | 2 |
| chrV   | 17415253 | 17416718 | GeneBounc  | K.NIFNSTNI  | 1        | 3  | FALSE | 3 |
| chrX   | 2237903  | 2240246  | FrameShift | R.EAALQM    | 0.996117 | 1  | TRUE  | 1 |
| chrIV  | 15826868 | 15828801 | NovelGene  | R.FFFLGDL   | 0.999997 | 2  | FALSE | 2 |
| chrV   | 16466445 | 16467919 | ReverseStr | R.VMYKKAI   | 0.999983 | 2  | FALSE | 2 |
| chrII  | 10350700 | 10351557 | FrameShift | K.TWDAKR    | 0.99815  | 1  | TRUE  | 1 |
| chrIII | 9799020  | 9802211  | FrameShift | K.HQLYTM    | 0.994235 | 1  | TRUE  | 1 |
| chrII  | 5055608  | 5056206  | FrameShift | Q.EPVEDGI   | 1        | 3  | TRUE  | 3 |
| chrIII | 6362927  | 6365414  | ReverseStr | R.FFYNYLH'  | 0.999974 | 2  | TRUE  | 2 |
| chrX   | 15885647 | 15887576 | FrameShift | R.PVFSITTK  | 0.994337 | 1  | TRUE  | 1 |
| chrV   | 1875538  | 1882239  | NovelExon  | K.KKTRKTYI  | 0.996251 | 1  | TRUE  | 1 |
| chrV   | 7123639  | 7128871  | NovelExon  | K.LRMCLAV   | 0.996834 | 1  | TRUE  | 1 |
| chrX   | 9685437  | 9688271  | NovelGene  | K.FEILADSK  | 0.999955 | 2  | FALSE | 2 |
| chrIV  | 14371314 | 14371904 | NovelExon  | R.QFWIENC   | 0.998356 | 1  | TRUE  | 1 |
| chrI   | 853454   | 871950   | GeneBounc  | K.NEIIDKN   | 0.999949 | 2  | FALSE | 2 |
| chrIII | 9947819  | 9950191  | ReverseStr | K.KNKNLKL   | 0.999932 | 2  | TRUE  | 2 |
| chrV   | 17371519 | 17376712 | NovelExon  | K.KQKTKNK   | 0.996203 | 1  | TRUE  | 1 |
| chrIV  | 1329162  | 1339376  | NovelExon  | K.IRKKFSRC  | 0.996594 | 1  | TRUE  | 1 |
| chrV   | 20480761 | 20485354 | ReverseStr | R.GAQHVEI   | 1        | 9  | TRUE  | 6 |
| chrIV  | 8261131  | 8266441  | NovelExon  | _.FDSDDVT   | 0.999956 | 2  | TRUE  | 2 |
| chrI   | 6789095  | 6789739  | ReverseStr | K.YLGAYLL   | 1        | 11 | TRUE  | 5 |
| chrI   | 6814529  | 6834698  | NovelExon  | K.QEVLEM    | 0.998623 | 1  | TRUE  | 1 |
| chrIII | 8853723  | 8861021  | NovelExon  | R.NGDSQV    | 1        | 1  | TRUE  | 1 |
| chrI   | 5079913  | 5082284  | ReverseStr | K.FQITNFEI  | 0.999979 | 2  | TRUE  | 2 |
| chrI   | 1053924  | 1066904  | ReverseStr | R.IACISLEKI | 0.999997 | 2  | TRUE  | 2 |
| chrIII | 235843   | 253375   | NovelExon  | R.EIRRKMA   | 0.996717 | 1  | TRUE  | 1 |
| chrIII | 9393897  | 9404448  | FrameShift | K.DEMMTV    | 0.995039 | 1  | TRUE  | 1 |
| chrI   | 2878580  | 2880938  | GeneBounc  | F.RAPHELQ   | 0.999987 | 2  | FALSE | 2 |
| chrV   | 1276416  | 1285700  | FrameShift | R.KLRNSGS   | 0.995287 | 1  | TRUE  | 1 |
| chrV   | 19136480 | 19139021 | NovelExon  | K.NSKKEDA   | 0.995151 | 1  | TRUE  | 1 |
| chrI   | 8377596  | 8392747  | NovelExon  | _.KDSVEAE   | 0.995327 | 1  | TRUE  | 1 |
| chrI   | 8601352  | 8602028  | ExonBounc  | R.YKFRLFFS  | 0.9981   | 1  | TRUE  | 1 |
| chrII  | 6674234  | 6679329  | GeneBounc  | R.FSYVGC    | 1        | 7  | FALSE | 6 |
| chrIII | 11343184 | 11344137 | GeneBounc  | _.KSPIFPPK  | 0.999979 | 2  | FALSE | 2 |

|        |          |          |             |             |          |   |       |   |
|--------|----------|----------|-------------|-------------|----------|---|-------|---|
| chrV   | 2100061  | 2103217  | FrameShift  | K.VLAGCSP   | 0.997393 | 1 | TRUE  | 1 |
| chrIV  | 7213202  | 7217968  | ExonBounc   | K.DAGGNH    | 0.999794 | 1 | TRUE  | 1 |
| chrI   | 14512651 | 14518707 | NovelExon   | K.NFKKNPII  | 0.995974 | 1 | TRUE  | 1 |
| chrV   | 899313   | 903580   | NovelExon   | K.PQAKPNF   | 0.995486 | 1 | TRUE  | 1 |
| chrV   | 15512161 | 15512755 | FrameShift  | _.VEVAGAF   | 0.999994 | 2 | TRUE  | 2 |
| chrIV  | 4443125  | 4445834  | ReverseStr: | _.IVIDEQEC  | 1        | 6 | TRUE  | 3 |
| chrI   | 5620780  | 5623053  | FrameShift  | K.IKPMFSD   | 0.995448 | 1 | TRUE  | 1 |
| chrIII | 6870282  | 6871071  | GeneBounc   | R.RRGNRKE   | 0.999927 | 2 | FALSE | 2 |
| chrX   | 1509233  | 1509787  | NovelGene   | _.FPKPEPK.  | 0.999989 | 2 | FALSE | 2 |
| chrV   | 12065941 | 12067938 | ReverseStr: | S.MNDMKI    | 0.999986 | 2 | FALSE | 2 |
| chrV   | 18948540 | 18950930 | NovelGene   | R.DTEMKH    | 0.999957 | 2 | FALSE | 2 |
| chrX   | 9512762  | 9516378  | FrameShift  | K.LHDSGLC   | 0.999487 | 1 | TRUE  | 1 |
| chrIV  | 8492529  | 8494474  | GeneBounc   | K.KGEQDF/   | 0.999993 | 2 | FALSE | 2 |
| chrI   | 2018980  | 2021016  | NovelGene   | K.RPKKGDL   | 1        | 2 | FALSE | 2 |
| chrIII | 1419194  | 1419906  | GeneBounc   | _.NLEKKIGI  | 1        | 9 | FALSE | 3 |
| chrI   | 2057818  | 2059972  | NovelGene   | R.QWQQDI    | 1        | 3 | FALSE | 3 |
| chrV   | 16023331 | 16024175 | FrameShift  | _.SSRINTRF  | 0.9945   | 1 | TRUE  | 1 |
| chrII  | 2136559  | 2137305  | FrameShift  | R.ENSKFYFI  | 0.998243 | 1 | TRUE  | 1 |
| chrV   | 20667203 | 20678509 | ExonBounc   | K.KNEKXXX   | 0.994527 | 1 | TRUE  | 1 |
| chrV   | 20580965 | 20590309 | NovelExon   | K.QIFFADA   | 0.996353 | 1 | TRUE  | 1 |
| chrII  | 13396016 | 13401945 | NovelExon   | K.MFGFWK    | 0.995837 | 1 | TRUE  | 1 |
| chrX   | 42875    | 47060    | FrameShift  | K.SRRSKKPI  | 0.998619 | 1 | TRUE  | 1 |
| chrX   | 8272022  | 8273851  | NovelGene   | R.KIGVQAN   | 1        | 3 | FALSE | 3 |
| chrX   | 5101001  | 5106142  | NovelExon   | R.SYLLKNEE  | 0.998985 | 1 | TRUE  | 1 |
| chrX   | 10822393 | 10838585 | NovelExon   | K.PVYPIFLY  | 0.998714 | 1 | TRUE  | 1 |
| chrV   | 19607481 | 19608380 | GeneBounc   | M.YVKNNII   | 1        | 3 | FALSE | 3 |
| chrV   | 20479658 | 20480815 | FrameShift  | K.VVQSVNF   | 0.999575 | 2 | TRUE  | 1 |
| chrIII | 7035372  | 7045665  | NovelExon   | K.WSLIECV   | 0.996097 | 1 | TRUE  | 1 |
| chrII  | 9324815  | 9329605  | GeneBounc   | R.AISIASSR. | 1        | 7 | FALSE | 7 |
| chrIV  | 4595950  | 4596727  | ReverseStr: | K.NNSKNLT   | 0.999963 | 2 | FALSE | 2 |
| chrX   | 4588741  | 4590420  | FrameShift  | R.PSIHIYPSI | 1        | 1 | TRUE  | 1 |
| chrIII | 7223291  | 7226862  | NovelExon   | K.STVPGLD   | 0.999597 | 1 | TRUE  | 1 |
| chrIII | 2636464  | 2640277  | NovelExon   | _.VNGEVPK   | 0.996833 | 1 | TRUE  | 1 |
| chrII  | 5116024  | 5118267  | NovelExon   | K.AKSVETSI  | 0.996552 | 1 | TRUE  | 1 |
| chrII  | 3150143  | 3152578  | FrameShift  | _.MKNTYFI   | 0.99522  | 1 | TRUE  | 1 |
| chrIV  | 1545299  | 1566194  | ReverseStr: | R.RRRVGR/   | 0.999998 | 2 | TRUE  | 2 |
| chrV   | 13813295 | 13815258 | FrameShift  | R.ARKMIAF   | 0.994558 | 1 | TRUE  | 1 |
| chrV   | 14930517 | 14932183 | NovelGene   | H.QENGFS\   | 0.999985 | 2 | FALSE | 2 |
| chrII  | 14155693 | 14165954 | NovelExon   | K.SSKNVEV   | 0.998491 | 1 | TRUE  | 1 |
| chrI   | 7472607  | 7476942  | ReverseStr: | Y.SRPIGKIL  | 0.999971 | 3 | FALSE | 2 |
| chrIII | 4618842  | 4643271  | FrameShift  | R.YPATWR    | 0.994538 | 1 | TRUE  | 1 |
| chrII  | 8482321  | 8483821  | NovelExon   | K.CIFLELME  | 0.996681 | 1 | TRUE  | 1 |
| chrIII | 11334741 | 11342145 | NovelExon   | _.KSPIFPPK  | 0.996726 | 1 | TRUE  | 1 |
| chrV   | 4975480  | 4977485  | FrameShift  | R.VSSGFAK   | 0.995731 | 1 | TRUE  | 1 |
| chrIII | 13642318 | 13643475 | GeneBounc   | R.LSGTVPII  | 0.999979 | 2 | FALSE | 2 |
| chrX   | 5255162  | 5256826  | FrameShift  | K.WTADM     | 0.999744 | 1 | TRUE  | 1 |
| chrX   | 2599400  | 2606724  | ReverseStr: | K.KYNFCNK   | 0.999978 | 2 | TRUE  | 2 |



|        |          |          |            |             |          |     |       |    |
|--------|----------|----------|------------|-------------|----------|-----|-------|----|
| chrIII | 13395605 | 13400505 | FrameShift | R.FTYRSTCI  | 0.994127 | 1   | TRUE  | 1  |
| chrII  | 5036549  | 5040091  | ReverseStr | K.IIIFGAVLk | 0.999944 | 2   | FALSE | 2  |
| chrV   | 103399   | 104064   | ReverseStr | K.MAPAVK    | 1        | 4   | TRUE  | 4  |
| chrI   | 1862614  | 1872308  | ReverseStr | R.RKSLFNG   | 0.99997  | 2   | FALSE | 2  |
| chrV   | 11081034 | 11082479 | GeneBounc  | _.KKRENGK   | 1        | 8   | FALSE | 7  |
| chrX   | 10104553 | 10125424 | ReverseStr | K.TIEHEDSI  | 0.999984 | 2   | TRUE  | 2  |
| chrX   | 9858307  | 9861677  | ReverseStr | F.TEMPLGC   | 0.999999 | 2   | FALSE | 2  |
| chrX   | 15726061 | 15731957 | ReverseStr | _.IYVVSTFS  | 0.999976 | 2   | TRUE  | 2  |
| chrX   | 6672792  | 6674374  | FrameShift | R.EQLDQGI   | 0.997105 | 1   | TRUE  | 1  |
| chrII  | 8464797  | 8467028  | FrameShift | K.SSLTSTSS  | 0.99872  | 1   | TRUE  | 1  |
| chrII  | 4351189  | 4353163  | ReverseStr | _.FNIFQIIIF | 0.999995 | 2   | TRUE  | 2  |
| chrX   | 12725370 | 12727581 | FrameShift | R.MSAEASF   | 0.998199 | 1   | TRUE  | 1  |
| chrX   | 14002950 | 14012526 | ReverseStr | _.LHLLDFV(  | 0.999995 | 2   | TRUE  | 2  |
| chrIII | 7969271  | 7970221  | FrameShift | _.FISVQFHf  | 0.99855  | 1   | TRUE  | 1  |
| chrX   | 344127   | 346289   | ExonBounc  | _.MQNNKL    | 0.998524 | 1   | TRUE  | 1  |
| chrIV  | 7237717  | 7239885  | GeneBounc  | R.MPSSSSS   | 0.999993 | 2   | FALSE | 2  |
| chrIII | 5564985  | 5567344  | FrameShift | A.QTHPLAL   | 1        | 1   | TRUE  | 1  |
| chrV   | 19273000 | 19273935 | NovelGene  | R.CYRYIIVS  | 0.999974 | 2   | FALSE | 2  |
| chrII  | 480465   | 484393   | FrameShift | G.ESSRFLT(  | 0.997549 | 1   | TRUE  | 1  |
| chrIV  | 7821660  | 7822688  | ReverseStr | K.KCINNNII  | 1        | 7   | TRUE  | 6  |
| chrIII | 11804447 | 11806695 | NovelExon  | K.CIRLRNFC  | 0.997943 | 1   | TRUE  | 1  |
| chrV   | 19195299 | 19198894 | NovelExon  | K.MQFFRLk   | 0.997415 | 1   | TRUE  | 1  |
| chrIII | 5708147  | 5709284  | ReverseStr | L.VMDVHR    | 1        | 9   | TRUE  | 3  |
| chrII  | 10192470 | 10193361 | FrameShift | R.ELYVSQT:  | 0.994558 | 1   | TRUE  | 1  |
| chrI   | 2883498  | 2893720  | ReverseStr | K.KIGGAGII  | 1        | 3   | TRUE  | 3  |
| chrIV  | 11465464 | 11467217 | GeneBounc  | _.FRFGDCR   | 0.999948 | 2   | FALSE | 2  |
| chrI   | 6141471  | 6144388  | FrameShift | _.KLLYAYSk  | 0.997796 | 1   | TRUE  | 1  |
| chrV   | 10904040 | 10906755 | NovelExon  | K.KWLGRM    | 0.999937 | 2   | TRUE  | 2  |
| chrV   | 18318567 | 18319748 | ReverseStr | _.SRPGPHC   | 1        | 3   | TRUE  | 3  |
| chrI   | 7218784  | 7221346  | FrameShift | K.CAVTSRL   | 0.99508  | 1   | TRUE  | 1  |
| chrI   | 3794556  | 3798056  | ReverseStr | K.TKRNGLR   | 0.999954 | 2   | FALSE | 2  |
| chrIII | 6149930  | 6154881  | NovelExon  | K.SSDDRKR   | 0.995464 | 1   | TRUE  | 1  |
| chrII  | 12433352 | 12435782 | ReverseStr | K.SRGGYDL   | 0.999943 | 2   | TRUE  | 2  |
| chrIV  | 9529970  | 9531210  | GeneBounc  | R.LVTVSEG   | 0.999937 | 2   | FALSE | 2  |
| chrI   | 5402898  | 5408462  | ReverseStr | K.CVRMLD    | 0.999976 | 2   | TRUE  | 2  |
| chrIII | 6972155  | 6973667  | GeneBounc  | _.LEMRNRf   | 1        | 139 | FALSE | 23 |
| chrX   | 4885921  | 4889547  | FrameShift | K.GFSLPNE   | 0.995937 | 1   | TRUE  | 1  |
| chrIII | 10189127 | 10195308 | ExonBounc  | R.IDALGDD   | 0.999275 | 1   | TRUE  | 1  |
| chrIV  | 7213202  | 7217968  | GeneBounc  | K.MWMNV     | 1        | 3   | FALSE | 3  |
| chrIII | 5228378  | 5230505  | FrameShift | _.IYVPADD   | 1        | 4   | TRUE  | 4  |
| chrII  | 11100914 | 11103699 | ReverseStr | K.KWGGDE    | 1        | 8   | FALSE | 4  |
| chrIV  | 9805654  | 9806098  | GeneBounc  | K.NEELVTT   | 1        | 3   | FALSE | 3  |
| chrIII | 8080547  | 8083630  | FrameShift | R.ENGNVSc   | 0.998867 | 1   | TRUE  | 1  |
| chrV   | 8215545  | 8217683  | ReverseStr | V.FNEIMSY   | 0.999977 | 2   | TRUE  | 2  |
| chrIII | 6118681  | 6124015  | GeneBounc  | R.HYLLNLPI  | 0.99999  | 2   | FALSE | 2  |
| chrII  | 7936541  | 7938532  | ReverseStr | R.FMVVLKf   | 0.99999  | 2   | FALSE | 2  |
| chrV   | 6268387  | 6270464  | NovelExon  | R.MASKLFL   | 0.994999 | 1   | TRUE  | 1  |

|        |          |          |            |            |          |   |       |   |
|--------|----------|----------|------------|------------|----------|---|-------|---|
| chrV   | 17879818 | 17888958 | NovelExon  | K.FQFRQFA  | 0.997041 | 1 | TRUE  | 1 |
| chrI   | 5776157  | 5788612  | GeneBound  | K.QKKMLQ   | 0.999986 | 2 | FALSE | 2 |
| chrII  | 6835038  | 6847865  | NovelExon  | _.LNSFLSSY | 0.999559 | 1 | TRUE  | 1 |
| chrII  | 13064816 | 13070903 | ReverseStr | _.VTEKVLK  | 0.999997 | 2 | FALSE | 2 |
| chrIII | 10821733 | 10822267 | NovelGene  | R.YPVSMRC  | 0.999986 | 2 | FALSE | 2 |
| chrX   | 3763041  | 3764379  | NovelExon  | K.NVIAPMC  | 0.994346 | 1 | TRUE  | 1 |
| chrV   | 13727748 | 13730763 | NovelExon  | K.TFGTIVYT | 0.996943 | 1 | TRUE  | 1 |
| chrV   | 12021174 | 12023830 | GeneBound  | R.LYQDGLA  | 1        | 2 | FALSE | 2 |
| chrI   | 2915178  | 2918808  | FrameShift | R.WGDHGF   | 0.999956 | 2 | TRUE  | 2 |
| chrIV  | 13091160 | 13093820 | NovelExon  | K.KIAKEWK  | 0.998992 | 1 | TRUE  | 1 |
| chrIV  | 1854315  | 1880591  | NovelExon  | R.AEPLVLS/ | 0.999606 | 1 | TRUE  | 1 |
| chrI   | 10033532 | 10034813 | ReverseStr | K.LQNFTES  | 1        | 3 | TRUE  | 3 |
| chrIV  | 11463515 | 11465204 | ExonBound  | K.IVISKHIF | 0.994556 | 1 | TRUE  | 1 |
| chrIV  | 2887050  | 2891441  | Translated | W.AVTDGC   | 1        | 3 | TRUE  | 3 |
| chrV   | 11291170 | 11292551 | ReverseStr | K.KMENLDI  | 1        | 4 | TRUE  | 3 |
| chrX   | 4008036  | 4016123  | GeneBound  | K.MKWTKK   | 0.999995 | 2 | FALSE | 2 |
| chrI   | 5044204  | 5045723  | NovelExon  | R.GQQKFF   | 0.996985 | 1 | TRUE  | 1 |
| chrIII | 5385578  | 5404946  | FrameShift | L.LNESRDG  | 0.998341 | 1 | TRUE  | 1 |
| chrIII | 1605738  | 1606821  | GeneBound  | K.SEIPRKIA | 0.999922 | 2 | FALSE | 2 |
| chrIV  | 5947024  | 5947595  | ReverseStr | _.KDPKGGF  | 0.999997 | 8 | TRUE  | 2 |
| chrV   | 11760653 | 11761876 | GeneBound  | _.SITPSPLK | 0.999961 | 3 | FALSE | 2 |
| chrX   | 16817353 | 16818277 | ReverseStr | R.SRAAASR  | 0.999916 | 2 | FALSE | 2 |
| chrII  | 13448765 | 13460572 | ReverseStr | L.QMALQEI  | 1        | 3 | TRUE  | 3 |
| chrII  | 5336222  | 5340801  | ReverseStr | K.SFVCMCK  | 0.999926 | 2 | FALSE | 2 |
| chrIV  | 5850828  | 5859965  | NovelExon  | K.RRSPSCQ  | 0.998436 | 1 | TRUE  | 1 |
| chrI   | 13840694 | 13841834 | GeneBound  | K.KIFWRTS  | 0.999982 | 2 | FALSE | 2 |
| chrIV  | 11592199 | 11592835 | ReverseStr | K.KSYSLKT  | 0.999964 | 2 | TRUE  | 2 |
| chrI   | 9647594  | 9649209  | GeneBound  | K.KRKTDRK  | 1        | 2 | FALSE | 2 |
| chrII  | 7105521  | 7106274  | FrameShift | _.KNICAIPK | 0.99653  | 1 | TRUE  | 1 |
| chrX   | 3403457  | 3408591  | ExonBound  | R.EIKKQHT  | 0.994242 | 1 | TRUE  | 1 |
| chrII  | 1581201  | 1582447  | GeneBound  | K.KKTVIRW  | 1        | 3 | FALSE | 3 |
| chrIII | 4568981  | 4571803  | FrameShift | R.LLHAFFEI | 0.99854  | 1 | TRUE  | 1 |
| chrIV  | 5584651  | 5610342  | NovelExon  | _.NLFSVVS  | 0.996596 | 1 | TRUE  | 1 |
| chrX   | 10537044 | 10542361 | ExonBound  | _.LRFKDNC  | 0.997391 | 1 | TRUE  | 1 |
| chrIV  | 14914353 | 14916605 | NovelGene  | K.VFHETIIF | 0.99998  | 2 | FALSE | 2 |
| chrIII | 3345910  | 3363419  | NovelExon  | F.RNETPLL  | 0.99435  | 1 | TRUE  | 1 |
| chrX   | 5174338  | 5177475  | NovelExon  | V.MQLGAN   | 0.997721 | 1 | TRUE  | 1 |
| chrIV  | 1567896  | 1595823  | NovelExon  | R.ILEIGSGG | 1        | 1 | TRUE  | 1 |
| chrV   | 17954095 | 17966899 | ReverseStr | R.KFKKISIF | 1        | 4 | TRUE  | 4 |
| chrIV  | 8226327  | 8236588  | FrameShift | _.KSFFFNS  | 0.994309 | 1 | TRUE  | 1 |
| chrIII | 10530478 | 10532604 | GeneBound  | R.SQVDDVI  | 0.999963 | 2 | FALSE | 2 |
| chrIV  | 4610568  | 4624110  | ReverseStr | R.GFRVEDK  | 1        | 3 | FALSE | 3 |
| chrX   | 5528177  | 5538481  | FrameShift | K.LEMEME   | 0.99799  | 1 | TRUE  | 1 |
| chrV   | 19534885 | 19544048 | ReverseStr | K.HCSNKKM  | 0.999979 | 2 | TRUE  | 2 |
| chrIII | 3006842  | 3028694  | NovelExon  | R.KKSDFETI | 0.995799 | 1 | TRUE  | 1 |
| chrX   | 4320839  | 4326325  | NovelExon  | K.NYHKFGM  | 0.995764 | 1 | TRUE  | 1 |
| chrII  | 11885525 | 11886284 | FrameShift | _.WPYGAP   | 0.996372 | 1 | TRUE  | 1 |

|        |          |          |            |            |          |   |       |   |
|--------|----------|----------|------------|------------|----------|---|-------|---|
| chrII  | 7012753  | 7022467  | NovelExon  | K.INLKVNSI | 0.99744  | 1 | TRUE  | 1 |
| chrI   | 10298206 | 10300578 | GeneBounc  | K.YVTENVA  | 0.999973 | 2 | FALSE | 2 |
| chrI   | 9149710  | 9153068  | FrameShift | R.TKNTHRA  | 0.997327 | 1 | TRUE  | 1 |
| chrII  | 10278672 | 10280399 | NovelExon  | R.LVNDFV   | 0.997498 | 1 | TRUE  | 1 |
| chrV   | 4801085  | 4802612  | ExonBounc  | _.QWKVKN   | 0.998639 | 1 | TRUE  | 1 |
| chrIV  | 16720682 | 16722703 | NovelExon  | R.ATVLPWS  | 0.995793 | 1 | TRUE  | 1 |
| chrV   | 10764346 | 10768434 | FrameShift | R.SLSRLEIR | 0.997567 | 1 | TRUE  | 1 |
| chrIII | 10902549 | 10908828 | NovelExon  | K.TGGSNRK  | 0.994017 | 1 | TRUE  | 1 |
| chrIV  | 3032764  | 3050100  | NovelExon  | K.ATNFRFP  | 0.99973  | 1 | TRUE  | 1 |
| chrX   | 14307793 | 14311613 | NovelExon  | K.ILYKIKTC | 0.999981 | 2 | TRUE  | 2 |
| chrIV  | 1094550  | 1096558  | ReverseStr | R.IFNFPGF  | 0.99998  | 2 | TRUE  | 2 |
| chrII  | 8038219  | 8039545  | ExonBounc  | R.GFGVDGI  | 0.999843 | 1 | TRUE  | 1 |
| chrX   | 14333499 | 14340411 | FrameShift | R.LYRNTSK  | 1        | 1 | TRUE  | 1 |
| chrI   | 3059253  | 3069395  | NovelExon  | R.KNEKTKK  | 0.998351 | 1 | TRUE  | 1 |
| chrII  | 12536439 | 12538535 | FrameShift | R.TCSKRALI | 0.996964 | 1 | TRUE  | 1 |
| chrX   | 4110409  | 4111443  | ReverseStr | R.VIIKCGEV | 0.999948 | 2 | FALSE | 2 |
| chrX   | 12603554 | 12603992 | GeneBounc  | _.DGSERW   | 1        | 3 | FALSE | 3 |
| chrII  | 3209660  | 3210847  | GeneBounc  | K.PADCGA   | 0.999908 | 2 | FALSE | 2 |
| chrII  | 12726889 | 12736805 | ExonBounc  | K.FSNFQRA  | 0.997613 | 1 | TRUE  | 1 |
| chrII  | 8725483  | 8729727  | NovelExon  | K.NYQQCR   | 0.998421 | 1 | TRUE  | 1 |
| chrIII | 13319164 | 13321791 | ReverseStr | K.TSKLSSC  | 0.99993  | 2 | TRUE  | 2 |
| chrI   | 13629216 | 13633485 | ExonBounc  | L.GVFFSDP  | 0.995248 | 1 | TRUE  | 1 |
| chrX   | 10605769 | 10624122 | ReverseStr | K.FAGCALG  | 0.999947 | 2 | TRUE  | 2 |
| chrV   | 1826631  | 1830029  | NovelExon  | K.KLAPPLY  | 0.996507 | 1 | TRUE  | 1 |
| chrX   | 10154764 | 10156797 | GeneBounc  | _.RHNDFG   | 0.999997 | 2 | FALSE | 2 |
| chrX   | 17459086 | 17460693 | ReverseStr | R.YIIFEKFL | 0.999979 | 2 | TRUE  | 2 |
| chrI   | 13560517 | 13563454 | ReverseStr | R.RSETEAC  | 1        | 4 | TRUE  | 4 |
| chrIV  | 12124930 | 12126766 | FrameShift | R.NNRSV    | 0.997602 | 1 | TRUE  | 1 |
| chrV   | 10925315 | 10926777 | GeneBounc  | K.ISSVLSST | 0.999976 | 2 | FALSE | 2 |
| chrX   | 5101001  | 5106142  | FrameShift | _.NQGVLP   | 0.998639 | 1 | TRUE  | 1 |
| chrIV  | 14950679 | 14954183 | GeneBounc  | _.RLSWNLF  | 0.999998 | 2 | FALSE | 2 |
| chrX   | 545483   | 551368   | NovelExon  | K.IESFEKLP | 0.998305 | 1 | TRUE  | 1 |
| chrIV  | 9082348  | 9087551  | NovelExon  | K.KNNTKLV  | 0.997313 | 1 | TRUE  | 1 |
| chrV   | 16024355 | 16027433 | GeneBounc  | _.FIFSVVVF | 1        | 3 | FALSE | 3 |
| chrIII | 5228378  | 5230505  | ReverseStr | R.LDRPMS   | 0.999999 | 2 | FALSE | 2 |
| chrI   | 1446668  | 1465342  | NovelExon  | K.KNLELFL  | 0.997596 | 1 | TRUE  | 1 |
| chrI   | 8019707  | 8022710  | GeneBounc  | R.ESNDASK  | 0.999981 | 2 | FALSE | 2 |
| chrII  | 8423900  | 8429012  | FrameShift | K.IFSVEICL | 0.996786 | 1 | TRUE  | 1 |
| chrIV  | 426168   | 427205   | FrameShift | Q.DKEQVG   | 1        | 1 | TRUE  | 1 |
| chrV   | 13002327 | 13006973 | GeneBounc  | W.KNNTNC   | 0.99997  | 2 | FALSE | 2 |
| chrIV  | 5567043  | 5574100  | NovelExon  | K.LYSETEN  | 0.999472 | 1 | TRUE  | 1 |
| chrV   | 20559049 | 20561864 | ReverseStr | R.NFELSW   | 1        | 2 | FALSE | 2 |
| chrIV  | 10146205 | 10146986 | ReverseStr | R.ALESSRR  | 0.999981 | 2 | FALSE | 2 |
| chrIII | 4804876  | 4808676  | ReverseStr | R.KVINIYI  | 1        | 3 | TRUE  | 3 |
| chrIII | 8310935  | 8312515  | FrameShift | R.EKPVVER  | 0.994845 | 1 | TRUE  | 1 |
| chrIII | 13351292 | 13356266 | GeneBounc  | R.INSEGTP  | 1        | 4 | FALSE | 4 |
| chrII  | 2717527  | 2725546  | NovelExon  | K.NNQNNY   | 0.994867 | 1 | TRUE  | 1 |

|        |          |          |                         |          |   |       |   |
|--------|----------|----------|-------------------------|----------|---|-------|---|
| chrV   | 11802086 | 11811993 | ReverseStr: K.MEKALDI   | 0.999988 | 2 | TRUE  | 2 |
| chrI   | 11680495 | 11682355 | ExonBounc K.YTINCRVI    | 0.997186 | 1 | TRUE  | 1 |
| chrV   | 3992640  | 3994165  | ReverseStr: K.FQLLIISVI | 0.999958 | 3 | FALSE | 2 |
| chrIII | 4734422  | 4736050  | FrameShift K.NLESKCV    | 0.996518 | 1 | TRUE  | 1 |
| chrIV  | 8261131  | 8266441  | NovelExon _ .DMDYAFI    | 0.999932 | 1 | TRUE  | 1 |
| chrV   | 16852269 | 16854031 | NovelExon K.ATRQERT     | 0.994163 | 1 | TRUE  | 1 |
| chrX   | 16887218 | 16887878 | ReverseStr: K.ISNENSE   | 0.999996 | 3 | FALSE | 2 |
| chrV   | 15400310 | 15401803 | NovelExon G.SIRRITVN    | 0.998531 | 1 | TRUE  | 1 |
| chrIII | 9705538  | 9710184  | ExonBounc R.FQANPQI     | 1        | 1 | TRUE  | 1 |
| chrII  | 13729646 | 13731469 | NovelExon K.QLKTRPK     | 0.995523 | 1 | TRUE  | 1 |
| chrV   | 5839133  | 5845704  | ReverseStr: R.PHPHSA    | 0.999991 | 2 | TRUE  | 2 |
| chrX   | 7823603  | 7825698  | ExonBounc K.NMITGTS     | 1        | 3 | TRUE  | 3 |
| chrIV  | 15956539 | 15962680 | ReverseStr: K.CGKFTQK   | 1        | 2 | FALSE | 2 |
| chrIII | 9529082  | 9531807  | ReverseStr: _ .KVVLTEG  | 0.999993 | 2 | FALSE | 2 |
| chrIV  | 11089941 | 11091814 | NovelExon R.FCLAGDL     | 0.99551  | 1 | TRUE  | 1 |
| chrII  | 10507209 | 10509872 | FrameShift R.GITEKNIE   | 0.994314 | 1 | TRUE  | 1 |
| chrX   | 15209222 | 15213190 | NovelExon K.VVENFLT     | 0.995708 | 1 | TRUE  | 1 |
| chrIV  | 14798117 | 14799278 | GeneBounc K.KTSTSRA     | 0.999994 | 2 | FALSE | 2 |
| chrIV  | 2596332  | 2596836  | GeneBounc L.MQQNAS      | 1        | 3 | FALSE | 3 |
| chrIV  | 13777841 | 13779062 | FrameShift R.ILAAGGE    | 0.999023 | 1 | TRUE  | 1 |
| chrV   | 4890415  | 4891408  | FrameShift N.NAVDGE     | 0.999796 | 1 | TRUE  | 1 |
| chrX   | 4972529  | 4997567  | NovelExon K.LKAAAKF     | 0.994219 | 1 | TRUE  | 1 |
| chrIV  | 4390846  | 4393449  | GeneBounc K.GASVVV      | 1        | 2 | FALSE | 2 |
| chrIII | 4952086  | 4955085  | ReverseStr: _ .IGQKSKN  | 0.999979 | 2 | FALSE | 2 |
| chrI   | 10179835 | 10183987 | NovelExon R.TYGAAPC     | 0.996386 | 1 | TRUE  | 1 |
| chrI   | 2718028  | 2721479  | ReverseStr: R.EDVGEKA   | 0.999997 | 3 | TRUE  | 2 |
| chrI   | 1329290  | 1330330  | NovelGene K.MNNLDL      | 0.99996  | 2 | FALSE | 2 |
| chrI   | 1155346  | 1156023  | ReverseStr: R.INPYMSS   | 1        | 5 | FALSE | 5 |
| chrI   | 700277   | 715853   | ReverseStr: K.KHIYTYNI  | 0.999956 | 2 | FALSE | 2 |
| chrV   | 10261105 | 10270289 | ReverseStr: K.ETKRRKG   | 1        | 5 | TRUE  | 5 |
| chrII  | 3816963  | 3818240  | FrameShift R.RSKFYEN    | 0.99744  | 1 | TRUE  | 1 |
| chrX   | 8017972  | 8025841  | ReverseStr: K.SDAAPAK   | 0.999997 | 2 | TRUE  | 2 |
| chrII  | 10544150 | 10554984 | ReverseStr: K.KVCGDD    | 1        | 3 | FALSE | 3 |
| chrV   | 2074274  | 2074517  | NovelGene K.RPGQSN      | 0.999996 | 2 | FALSE | 2 |
| chrV   | 13749172 | 13751908 | FrameShift _ .LISLICKFL | 0.997265 | 1 | TRUE  | 1 |
| chrI   | 3694302  | 3697554  | ReverseStr: K.IYLQMSIS  | 0.999996 | 2 | TRUE  | 2 |
| chrII  | 1455425  | 1455497  | NovelGene S.LMSLMSL     | 0.999991 | 2 | FALSE | 2 |
| chrIII | 4479553  | 4481141  | NovelGene K.HMKFLYI     | 0.999969 | 2 | FALSE | 2 |
| chrII  | 3347577  | 3349873  | GeneBounc R.SLEFEFLS    | 0.999963 | 2 | FALSE | 2 |
| chrV   | 6259390  | 6260766  | FrameShift _ .FLNFSTN   | 0.996866 | 1 | TRUE  | 1 |
| chrIII | 13342583 | 13343236 | GeneBounc R.CTPSTPSF    | 1        | 4 | FALSE | 4 |
| chrII  | 1724661  | 1727112  | FrameShift R.LLLFSVCR   | 0.995378 | 1 | TRUE  | 1 |
| chrIV  | 17470473 | 17471988 | ReverseStr: _ .ICRRIYVC | 0.999969 | 2 | TRUE  | 2 |
| chrIII | 9757536  | 9762058  | ReverseStr: R.SSYLPLHF  | 1        | 3 | TRUE  | 3 |
| chrV   | 20281360 | 20289386 | NovelExon _ .KKSCLIQK   | 0.997325 | 1 | TRUE  | 1 |
| chrII  | 12535696 | 12542505 | NovelExon R.TCSKRALI    | 0.996964 | 1 | TRUE  | 1 |
| chrI   | 3653961  | 3655332  | FrameShift E.LMENQV     | 0.994625 | 1 | TRUE  | 1 |

|        |          |          |                          |          |    |       |    |
|--------|----------|----------|--------------------------|----------|----|-------|----|
| chrIV  | 9935046  | 9945754  | ReverseStr: R.EKEKENV    | 1        | 5  | TRUE  | 5  |
| chrI   | 700277   | 715853   | ReverseStr: R.NLALEGG    | 0.999993 | 4  | FALSE | 2  |
| chrII  | 1830638  | 1831795  | ExonBound K.SILLNSFV     | 0.998535 | 1  | TRUE  | 1  |
| chrIV  | 2945560  | 2947359  | NovelGene K.TFQNNSE      | 0.999999 | 2  | FALSE | 2  |
| chrIII | 12880940 | 12891637 | NovelExon _YFSTNFN       | 0.999577 | 1  | TRUE  | 1  |
| chrI   | 10823347 | 10828443 | FrameShift K.MKMRRM      | 0.999992 | 2  | TRUE  | 2  |
| chrII  | 10394069 | 10395288 | FrameShift G.EVINDNF     | 0.99861  | 1  | TRUE  | 1  |
| chrIV  | 950277   | 951384   | NovelGene K.ILYRKADI     | 0.999963 | 3  | FALSE | 2  |
| chrIII | 3965147  | 3976377  | ReverseStr: K.REGGNK\    | 0.99999  | 2  | TRUE  | 2  |
| chrIV  | 4294870  | 4295678  | GeneBound K.KISSIANV     | 0.999985 | 2  | FALSE | 2  |
| chrII  | 2131085  | 2132480  | FrameShift _NNYQYG\      | 0.997658 | 1  | TRUE  | 1  |
| chrIII | 13343723 | 13344515 | GeneBound R.RYALGFS      | 1        | 3  | FALSE | 3  |
| chrI   | 12020749 | 12028304 | FrameShift K.LLMSWIL     | 0.99778  | 1  | TRUE  | 1  |
| chrV   | 11076719 | 11078150 | ReverseStr: _ITALAPSS    | 1        | 30 | TRUE  | 20 |
| chrIII | 11608070 | 11611048 | GeneBound K.KSSKSSKT     | 1        | 4  | FALSE | 4  |
| chrX   | 8639410  | 8643220  | NovelExon K.NSKYRNK      | 0.998257 | 1  | TRUE  | 1  |
| chrI   | 1193161  | 1207868  | FrameShift _DGKSIFR      | 0.996086 | 1  | TRUE  | 1  |
| chrII  | 10030699 | 10033156 | FrameShift S.WEDVTM      | 0.998327 | 1  | TRUE  | 1  |
| chrI   | 2255925  | 2272868  | ReverseStr: K.LGMSQT/    | 0.99999  | 2  | TRUE  | 2  |
| chrIII | 587241   | 598114   | NovelExon R.MVLFLILL     | 0.995423 | 1  | TRUE  | 1  |
| chrIII | 542064   | 546532   | NovelExon R.KFPKPAT      | 0.997421 | 1  | TRUE  | 1  |
| chrX   | 5101001  | 5106142  | FrameShift R.TFDDVLY     | 1        | 10 | TRUE  | 8  |
| chrX   | 15568853 | 15572953 | FrameShift L.SESESQEE    | 0.998078 | 1  | TRUE  | 1  |
| chrV   | 894912   | 899152   | FrameShift K.SRKFPLN'    | 0.994268 | 1  | TRUE  | 1  |
| chrII  | 6845319  | 6847865  | GeneBound R.RSSSLFFL     | 0.999997 | 2  | FALSE | 2  |
| chrII  | 3902862  | 3904868  | FrameShift K.YRCKRRV     | 0.997038 | 1  | TRUE  | 1  |
| chrI   | 10298206 | 10300578 | FrameShift _AESLSYG/     | 0.996695 | 1  | TRUE  | 1  |
| chrV   | 9670008  | 9673547  | ReverseStr: R.DIIISLYIR' | 0.999973 | 2  | TRUE  | 2  |
| chrIV  | 858930   | 874529   | FrameShift _QVAITQI'     | 0.998642 | 1  | TRUE  | 1  |
| chrX   | 16340821 | 16345951 | ReverseStr: _LLLDDAG     | 0.999966 | 2  | TRUE  | 2  |
| chrII  | 12457511 | 12459446 | FrameShift K.PRDNLLD     | 0.996219 | 1  | TRUE  | 1  |
| chrIV  | 14846353 | 14847063 | FrameShift K.SLNSTSLM    | 0.996608 | 1  | TRUE  | 1  |
| chrX   | 2385758  | 2392688  | GeneBound R.ESINSIISP    | 0.999993 | 2  | FALSE | 2  |
| chrX   | 8661224  | 8671701  | FrameShift K.YRSVVPSP    | 0.997274 | 1  | TRUE  | 1  |
| chrII  | 11614572 | 11633545 | ReverseStr: K.NQPCRVI    | 0.999988 | 2  | TRUE  | 2  |
| chrIII | 12818357 | 12820151 | ReverseStr: R.KRLIFGYF   | 0.999976 | 2  | FALSE | 2  |
| chrIV  | 12653466 | 12674858 | FrameShift R.RISEELICI   | 0.994597 | 1  | TRUE  | 1  |
| chrV   | 10648757 | 10651800 | NovelExon K.TTEFPIAE     | 0.994079 | 1  | TRUE  | 1  |
| chrI   | 4911804  | 4914050  | ReverseStr: K.KMCEIVC    | 0.999983 | 2  | TRUE  | 2  |
| chrV   | 3691954  | 3701755  | NovelExon R.ALISFKKS     | 0.996058 | 1  | TRUE  | 1  |
| chrIII | 11210826 | 11212745 | NovelGene F.SKNLFSN'     | 1        | 2  | FALSE | 2  |
| chrIII | 10711732 | 10716092 | FrameShift K.IIFRILNSM   | 0.995962 | 1  | TRUE  | 1  |
| chrIV  | 13108116 | 13109775 | ReverseStr: K.KFISKIEP'  | 0.999995 | 2  | FALSE | 2  |
| chrI   | 10720815 | 10723580 | FrameShift R.VVITSSDC    | 0.996426 | 1  | TRUE  | 1  |
| chrV   | 14443342 | 14445325 | NovelExon R.KSRKNFT      | 0.994673 | 1  | TRUE  | 1  |
| chrX   | 1534415  | 1534939  | ReverseStr: K.MIKIPAIV   | 0.999999 | 3  | TRUE  | 3  |
| chrV   | 3684649  | 3685754  | ReverseStr: K.KYVESRD    | 0.999937 | 2  | FALSE | 2  |

|        |          |          |            |             |          |   |       |   |
|--------|----------|----------|------------|-------------|----------|---|-------|---|
| chrX   | 12705553 | 12808179 | NovelExon  | _.WEKCFSP   | 0.996417 | 1 | TRUE  | 1 |
| chrIII | 13091011 | 13093558 | GeneBound  | R.KFLKMKI   | 0.999996 | 2 | FALSE | 2 |
| chrI   | 10588921 | 10590455 | GeneBound  | K.LQIFETPF  | 0.999975 | 2 | FALSE | 2 |
| chrIV  | 4390846  | 4393449  | FrameShift | R.FSEVYRN   | 0.994989 | 1 | TRUE  | 1 |
| chrIII | 8962218  | 8965613  | FrameShift | R.RMRWRF    | 0.999949 | 2 | TRUE  | 2 |
| chrII  | 11918276 | 11933136 | Translated | K.KKCETTS   | 0.999996 | 2 | TRUE  | 2 |
| chrII  | 1339693  | 1350143  | NovelExon  | _.NLVYNSK   | 0.997799 | 1 | TRUE  | 1 |
| chrIV  | 6900315  | 6903613  | ReverseStr | R.HKMPLFI   | 0.999976 | 2 | TRUE  | 2 |
| chrIII | 3493798  | 3499044  | NovelExon  | R.KKNPSKS   | 0.99698  | 1 | TRUE  | 1 |
| chrX   | 12601939 | 12602317 | NovelGene  | _.KPKFSDTI  | 0.999983 | 2 | FALSE | 2 |
| chrV   | 16789308 | 16792750 | NovelExon  | R.GVHDWF    | 0.998152 | 1 | TRUE  | 1 |
| chrII  | 3341298  | 3342119  | GeneBound  | R.SLEFEFLS  | 1        | 4 | FALSE | 4 |
| chrII  | 10657966 | 10658567 | ExonBound  | E.LFQIIVM   | 0.995764 | 1 | TRUE  | 1 |
| chrV   | 3695959  | 3701755  | GeneBound  | K.IGNLAEIF  | 0.999987 | 2 | FALSE | 2 |
| chrX   | 12913244 | 12920061 | ReverseStr | K.MRACNT    | 0.999962 | 2 | FALSE | 2 |
| chrI   | 2515562  | 2516135  | NovelGene  | R.VFQDHF    | 0.999987 | 2 | FALSE | 2 |
| chrV   | 12320168 | 12332098 | NovelExon  | _.ECQEGYE   | 0.995539 | 1 | TRUE  | 1 |
| chrIII | 5668496  | 5676687  | NovelExon  | K.IKMTENL   | 0.996346 | 1 | TRUE  | 1 |
| chrX   | 9861592  | 9862897  | FrameShift | R.RMFSQLM   | 0.994821 | 1 | TRUE  | 1 |
| chrIII | 5448799  | 5449829  | ReverseStr | F.FPVFSIRE  | 0.999976 | 2 | TRUE  | 2 |
| chrV   | 15512748 | 15522002 | ReverseStr | R.AEKRFDL   | 1        | 3 | FALSE | 3 |
| chrX   | 7783136  | 7787884  | FrameShift | K.TRWAGIV   | 1        | 1 | TRUE  | 1 |
| chrIV  | 12387668 | 12389889 | FrameShift | R.KEEIKSFE  | 0.998832 | 1 | TRUE  | 1 |
| chrII  | 5378825  | 5379619  | FrameShift | _.PQFKTQA   | 0.997526 | 2 | TRUE  | 1 |
| chrI   | 1223959  | 1229284  | ReverseStr | R.SFKIPKIH  | 1        | 5 | TRUE  | 5 |
| chrV   | 6573966  | 6575780  | ReverseStr | R.QTSEFKD   | 1        | 4 | TRUE  | 3 |
| chrI   | 10026633 | 10030049 | NovelExon  | K.KTIFPKKK  | 0.99809  | 1 | TRUE  | 1 |
| chrI   | 10432812 | 10435812 | ExonBound  | Y.VVQVAID   | 1        | 1 | TRUE  | 1 |
| chrI   | 1193161  | 1207868  | GeneBound  | K.AAQDRE    | 0.999956 | 2 | FALSE | 2 |
| chrX   | 15929884 | 15939254 | FrameShift | G.CSWRNG    | 0.994849 | 1 | TRUE  | 1 |
| chrI   | 9506545  | 9511177  | FrameShift | R.MKHCPPI   | 0.998331 | 1 | TRUE  | 1 |
| chrII  | 4405864  | 4416686  | GeneBound  | _.SKKNVKN   | 0.999984 | 2 | FALSE | 2 |
| chrX   | 15801242 | 15804104 | ReverseStr | _.LLKLFDC   | 0.999946 | 2 | FALSE | 2 |
| chrII  | 6955364  | 6965645  | GeneBound  | K.FSGSSSAI  | 1        | 2 | FALSE | 2 |
| chrII  | 9595164  | 9596539  | GeneBound  | K.IMKRNK    | 1        | 3 | FALSE | 3 |
| chrII  | 9746659  | 9749913  | NovelExon  | K.ISQKNTI   | 0.994171 | 1 | TRUE  | 1 |
| chrIV  | 6531739  | 6535666  | NovelExon  | P.KLQICKQ   | 0.996971 | 1 | TRUE  | 1 |
| chrIII | 3070515  | 3083699  | GeneBound  | R.TRWKTW    | 1        | 2 | FALSE | 2 |
| chrIV  | 1386162  | 1399352  | ReverseStr | _.DMSYQSI   | 0.999944 | 2 | TRUE  | 2 |
| chrIII | 8965967  | 8967650  | ReverseStr | _.NYLDAHK   | 1        | 4 | TRUE  | 4 |
| chrIV  | 3755775  | 3759932  | NovelExon  | _.FGLIGAG   | 0.996815 | 1 | TRUE  | 1 |
| chrIII | 5607466  | 5610304  | ReverseStr | K.ISCSHQK   | 0.999933 | 2 | TRUE  | 2 |
| chrIV  | 17271056 | 17272147 | GeneBound  | K.PGYIRISN  | 0.999934 | 2 | FALSE | 2 |
| chrIII | 13188008 | 13204793 | NovelExon  | K.TRFFVEIL  | 0.998254 | 1 | TRUE  | 1 |
| chrX   | 5474002  | 5477293  | NovelGene  | K.CVILKEKII | 1        | 3 | FALSE | 3 |
| chrV   | 18592729 | 18613916 | FrameShift | K.KAPTPTTI  | 0.9972   | 1 | TRUE  | 1 |
| chrII  | 14924347 | 14952867 | FrameShift | R.SFHTATT   | 0.997225 | 1 | TRUE  | 1 |

|        |          |          |             |             |          |    |       |   |
|--------|----------|----------|-------------|-------------|----------|----|-------|---|
| chrX   | 15168652 | 15173551 | FrameShift  | R.KTCADFT   | 0.997376 | 1  | TRUE  | 1 |
| chrIV  | 17040878 | 17041488 | FrameShift  | _.KDRKEHS   | 0.999758 | 1  | TRUE  | 1 |
| chrIII | 6124110  | 6136224  | ReverseStr  | K.KNGKYVS   | 0.99999  | 2  | TRUE  | 2 |
| chrV   | 16850372 | 16852057 | GeneBound   | K.ATRQERT   | 0.999955 | 2  | FALSE | 2 |
| chrIV  | 14826417 | 14829083 | ReverseStr  | R.RREDKSD   | 1        | 12 | FALSE | 4 |
| chrII  | 9331584  | 9333907  | TranslatedI | R.DKNEFIV'  | 1        | 4  | TRUE  | 4 |
| chrI   | 585823   | 607574   | ReverseStr  | R.KNGSSAM   | 1        | 3  | TRUE  | 3 |
| chrII  | 7189379  | 7192466  | GeneBound   | R.LASTTCPI  | 0.999955 | 2  | FALSE | 2 |
| chrIII | 2436095  | 2442318  | FrameShift  | _.TWISTKPI  | 0.996046 | 1  | TRUE  | 1 |
| chrIV  | 12425194 | 12432516 | NovelExon   | K.RERMTGI   | 0.996845 | 1  | TRUE  | 1 |
| chrV   | 16320777 | 16327457 | NovelExon   | K.KTFSTRTH  | 0.994922 | 1  | TRUE  | 1 |
| chrII  | 1127983  | 1132354  | GeneBound   | K.SSSGSLSS  | 1        | 4  | FALSE | 4 |
| chrIII | 9614407  | 9615200  | FrameShift  | R.KGLFRGC   | 0.994752 | 1  | TRUE  | 1 |
| chrI   | 12652608 | 12654636 | FrameShift  | R.VVDALGI   | 0.999821 | 1  | TRUE  | 1 |
| chrV   | 3362781  | 3368318  | NovelExon   | K.RSQSGIY   | 0.996477 | 1  | TRUE  | 1 |
| chrIII | 2512638  | 2528618  | ReverseStr  | _.IGTEFKFF  | 0.999998 | 2  | FALSE | 2 |
| chrI   | 14486886 | 14495243 | ReverseStr  | K.NFLWKR    | 0.999993 | 2  | TRUE  | 2 |
| chrI   | 14285925 | 14287065 | FrameShift  | R.IYNQSMF   | 0.996261 | 1  | TRUE  | 1 |
| chrIII | 13633885 | 13635677 | NovelGene   | K.NFENEM'   | 1        | 3  | FALSE | 3 |
| chrII  | 386194   | 387920   | NovelExon   | K.VRKQFF    | 0.998195 | 1  | TRUE  | 1 |
| chrIV  | 14083779 | 14084635 | ReverseStr  | _.IVSKSGTK  | 0.999997 | 2  | TRUE  | 2 |
| chrV   | 3391680  | 3393291  | GeneBound   | R.TTLRTHQ   | 0.999972 | 2  | FALSE | 2 |
| chrV   | 1535224  | 1537079  | ExonBound   | K.QYPNVYL   | 0.994357 | 1  | TRUE  | 1 |
| chrIV  | 2264966  | 2275701  | ReverseStr  | R.RESSFQ    | 0.999916 | 2  | TRUE  | 2 |
| chrIV  | 461112   | 481167   | NovelExon   | K.FQVPRNL   | 0.995673 | 1  | TRUE  | 1 |
| chrIV  | 7150653  | 7152478  | ReverseStr  | K.CSTSFYVF  | 0.999972 | 2  | FALSE | 2 |
| chrV   | 5289809  | 5291178  | NovelGene   | K.WRKQWI    | 0.999991 | 2  | FALSE | 2 |
| chrX   | 10172267 | 10174098 | ReverseStr  | R.IIFDDNID  | 0.99993  | 2  | TRUE  | 2 |
| chrX   | 1484791  | 1485702  | ExonBound   | K.THTVGKV   | 0.995349 | 1  | TRUE  | 1 |
| chrII  | 11614572 | 11633545 | ReverseStr  | _.FKKKTFC   | 1        | 2  | TRUE  | 2 |
| chrI   | 5433910  | 5443029  | ReverseStr  | F.SSSVITILS | 0.999989 | 2  | TRUE  | 2 |
| chrIII | 10428237 | 10435886 | ExonBound   | _.HKNFPDA   | 0.995289 | 1  | TRUE  | 1 |
| chrIV  | 10372645 | 10374572 | ReverseStr  | K.QNSVRNI   | 1        | 3  | FALSE | 3 |
| chrII  | 13402910 | 13404559 | FrameShift  | E.ILMDDTV   | 0.994537 | 1  | TRUE  | 1 |
| chrI   | 12859489 | 12861283 | FrameShift  | V.LEVEVLG   | 0.998985 | 1  | TRUE  | 1 |
| chrIII | 5940939  | 5943791  | FrameShift  | T.FDLAGKC   | 1        | 1  | TRUE  | 1 |
| chrV   | 7120698  | 7122476  | ReverseStr  | K.LRMCLAV   | 0.999987 | 3  | TRUE  | 2 |
| chrI   | 5546426  | 5561645  | NovelExon   | S.SFGSLEKS  | 0.997089 | 1  | TRUE  | 1 |
| chrV   | 12704372 | 12707738 | FrameShift  | K.CWSKKNI   | 0.995319 | 1  | TRUE  | 1 |
| chrIV  | 86875    | 90082    | NovelExon   | K.LGMFRKI   | 0.996074 | 1  | TRUE  | 1 |
| chrX   | 11468435 | 11484202 | NovelExon   | K.EPVSMM'   | 0.998064 | 1  | TRUE  | 1 |
| chrIV  | 6762705  | 6765191  | ReverseStr  | _.IFFVIICM' | 0.999987 | 2  | TRUE  | 2 |
| chrII  | 9073678  | 9079132  | NovelGene   | K.QSTKMK    | 1        | 3  | FALSE | 3 |
| chrV   | 16823996 | 16824143 | NovelGene   | K.FFRQNEL   | 0.999998 | 2  | FALSE | 2 |
| chrIV  | 17096371 | 17099421 | TranslatedI | K.ILNFASA/  | 0.999996 | 2  | TRUE  | 2 |
| chrIV  | 208208   | 217002   | GeneBound   | _.KQLACSH   | 1        | 3  | FALSE | 2 |
| chrI   | 2875397  | 2876326  | ReverseStr  | K.IMQEKSP   | 1        | 12 | TRUE  | 5 |

|        |          |          |            |             |          |   |       |   |
|--------|----------|----------|------------|-------------|----------|---|-------|---|
| chrI   | 1600626  | 1601498  | FrameShift | R.FEPPFVPI  | 0.995869 | 1 | TRUE  | 1 |
| chrIII | 13457664 | 13462137 | ReverseStr | R.FSMFSGC   | 1        | 4 | TRUE  | 4 |
| chrX   | 10307813 | 10312122 | NovelExon  | K.NKQKKW    | 0.994984 | 1 | TRUE  | 1 |
| chrII  | 14192334 | 14194470 | NovelGene  | _.YEVNVKK   | 0.999958 | 2 | FALSE | 2 |
| chrX   | 13519593 | 13521467 | GeneBound  | K.TTEWMY    | 0.999944 | 2 | FALSE | 2 |
| chrII  | 1307113  | 1310140  | ReverseStr | R.KCHLQAI   | 1        | 4 | TRUE  | 3 |
| chrX   | 1470993  | 1472885  | FrameShift | K.RLKFRCS   | 0.999685 | 1 | TRUE  | 1 |
| chrII  | 15168462 | 15169784 | ReverseStr | R.QNKIVLIV  | 0.999977 | 2 | TRUE  | 2 |
| chrII  | 12189813 | 12199895 | ReverseStr | R.EEGNGLK   | 0.999987 | 2 | TRUE  | 2 |
| chrV   | 13406903 | 13408172 | GeneBound  | K.LSKEHFYF  | 0.999986 | 2 | FALSE | 2 |
| chrIV  | 14003668 | 14012049 | FrameShift | K.TICLKNYF  | 0.995151 | 1 | TRUE  | 1 |
| chrV   | 1852448  | 1856275  | NovelExon  | _.PYSNPIIS  | 0.996675 | 1 | TRUE  | 1 |
| chrIII | 1202540  | 1207321  | NovelExon  | K.NAENYNI   | 0.999214 | 1 | TRUE  | 1 |
| chrI   | 10429663 | 10432327 | GeneBound  | K.TGDGML    | 0.999997 | 2 | FALSE | 2 |
| chrIV  | 9649200  | 9650485  | GeneBound  | K.MGETKEI   | 0.99997  | 2 | FALSE | 2 |
| chrIV  | 10177948 | 10180285 | GeneBound  | _.LTGTLEGI  | 1        | 3 | FALSE | 3 |
| chrV   | 3313345  | 3315513  | ReverseStr | R.YWRNLKI   | 0.999973 | 2 | TRUE  | 2 |
| chrIV  | 9607734  | 9610175  | NovelGene  | K.WLKMGC    | 0.999981 | 2 | FALSE | 2 |
| chrIV  | 5831474  | 5834423  | NovelGene  | K.EKRCHVK   | 0.999996 | 2 | FALSE | 2 |
| chrI   | 4780457  | 4780844  | NovelGene  | K.IGKLPEIK  | 0.999992 | 2 | FALSE | 2 |
| chrII  | 187371   | 189202   | FrameShift | R.SFITWED   | 0.998745 | 1 | TRUE  | 1 |
| chrV   | 6762459  | 6765055  | GeneBound  | K.KAQKMT    | 0.999988 | 3 | FALSE | 2 |
| chrI   | 1211495  | 1254700  | NovelExon  | K.KNNWKIF   | 0.994249 | 1 | TRUE  | 1 |
| chrIII | 573981   | 576437   | NovelExon  | _.TLWNFFP   | 0.997656 | 1 | TRUE  | 1 |
| chrX   | 5064613  | 5066337  | GeneBound  | R.VLQMAK    | 1        | 3 | FALSE | 3 |
| chrX   | 2111772  | 2113078  | GeneBound  | _.FHASYPG   | 0.999914 | 2 | FALSE | 2 |
| chrII  | 7560877  | 7561546  | GeneBound  | K.AVGMGT    | 1        | 3 | FALSE | 3 |
| chrV   | 20091232 | 20105658 | NovelExon  | _.NFEKSIIEI | 0.996865 | 1 | TRUE  | 1 |
| chrIV  | 11482647 | 11498145 | ReverseStr | K.LPKLDAYI  | 0.999994 | 2 | TRUE  | 2 |
| chrIV  | 11696758 | 11699867 | FrameShift | C.IFLEFEVK  | 0.995741 | 1 | TRUE  | 1 |
| chrIII | 3789966  | 3800416  | ReverseStr | R.KISRSENI  | 0.999932 | 2 | TRUE  | 2 |
| chrV   | 14325786 | 14327829 | ReverseStr | K.FLLLIWKI  | 0.999967 | 2 | TRUE  | 2 |
| chrI   | 15053116 | 15058992 | NovelExon  | K.NGGSRNI   | 0.998463 | 1 | TRUE  | 1 |
| chrIV  | 13052943 | 13055130 | NovelExon  | R.NLNEVEII  | 0.997292 | 1 | TRUE  | 1 |
| chrX   | 13653738 | 13655276 | NovelGene  | R.ISGSKNLC  | 0.999951 | 2 | FALSE | 2 |
| chrIV  | 3341467  | 3341971  | GeneBound  | R.LIFERSGN  | 0.999976 | 2 | FALSE | 2 |
| chrII  | 4914489  | 4925242  | ExonBound  | F.QKFYSFQ   | 0.99949  | 1 | TRUE  | 1 |
| chrII  | 4227049  | 4229171  | FrameShift | R.QISTCKSS  | 0.997594 | 1 | TRUE  | 1 |
| chrI   | 11515118 | 11517099 | ReverseStr | R.QMDKSA    | 0.99998  | 2 | TRUE  | 2 |
| chrIII | 9993796  | 9996146  | ReverseStr | _.ALFVNHF   | 0.999971 | 3 | TRUE  | 2 |
| chrV   | 11763120 | 11764360 | ReverseStr | _.NSPLNRL   | 0.99998  | 4 | TRUE  | 2 |
| chrI   | 6009783  | 6011525  | ReverseStr | K.SGEVEGK   | 0.999992 | 2 | TRUE  | 2 |
| chrIV  | 8669129  | 8677961  | FrameShift | _.TRCCKSG   | 0.998386 | 1 | TRUE  | 1 |
| chrI   | 5902116  | 5904700  | FrameShift | G.EFLFKSEI  | 0.994643 | 1 | TRUE  | 1 |
| chrIII | 13626893 | 13630707 | ReverseStr | C.AFGFFDS   | 0.99999  | 3 | FALSE | 2 |
| chrX   | 6088993  | 6092089  | ExonBound  | K.SQVFSTA   | 0.999705 | 1 | TRUE  | 1 |
| chrX   | 2114537  | 2118251  | NovelExon  | R.EGDGEW    | 0.996098 | 1 | TRUE  | 1 |



|        |          |          |            |             |          |   |       |   |
|--------|----------|----------|------------|-------------|----------|---|-------|---|
| chrIV  | 3822078  | 3822856  | NovelGene  | R.MSKRLSC   | 0.999987 | 2 | FALSE | 2 |
| chrII  | 8118182  | 8122852  | FrameShift | R.MFRRPCI   | 0.996704 | 1 | TRUE  | 1 |
| chrII  | 13272564 | 13304159 | NovelExon  | K.IGGVQGV   | 0.997679 | 1 | TRUE  | 1 |
| chrII  | 11188147 | 11189381 | GeneBound  | F.SMKEIKN   | 0.999914 | 2 | FALSE | 2 |
| chrII  | 8143829  | 8144621  | FrameShift | _.IKNSHTQ   | 0.995274 | 1 | TRUE  | 1 |
| chrIII | 5036400  | 5040366  | NovelExon  | R.FVVLSC    | 0.996967 | 1 | TRUE  | 1 |
| chrV   | 19660536 | 19661940 | NovelGene  | K.KIFSKFFE  | 0.999976 | 2 | FALSE | 2 |
| chrII  | 3637814  | 3639287  | ReverseStr | R.LLLPTIAC  | 1        | 4 | FALSE | 3 |
| chrX   | 15746937 | 15752070 | NovelExon  | K.RKINGEK   | 0.994326 | 1 | TRUE  | 1 |
| chrI   | 10432812 | 10435867 | NovelExon  | Y.VVQVAID   | 1        | 1 | TRUE  | 1 |
| chrX   | 5766447  | 5770758  | ReverseStr | R.FVTFVVG   | 0.999996 | 3 | TRUE  | 2 |
| chrV   | 3408867  | 3409516  | GeneBound  | K.ENKSEKF   | 0.999968 | 2 | FALSE | 2 |
| chrX   | 12106334 | 12108547 | NovelExon  | K.PVNIENLI  | 0.997979 | 1 | TRUE  | 1 |
| chrI   | 11224949 | 11233329 | GeneBound  | R.KMLWW     | 0.99994  | 2 | FALSE | 2 |
| chrIV  | 4205968  | 4218241  | Translated | R.SIFSKNTT  | 0.999956 | 2 | TRUE  | 2 |
| chrX   | 12105072 | 12106013 | FrameShift | R.EWTRRSF   | 0.998772 | 1 | TRUE  | 1 |
| chrIV  | 11530590 | 11541081 | ReverseStr | _.IFSKFGQL  | 0.99996  | 2 | TRUE  | 2 |
| chrV   | 3201950  | 3204221  | NovelGene  | R.NEEENISI  | 0.999945 | 2 | FALSE | 2 |
| chrIV  | 3601759  | 3603373  | ReverseStr | R.SWSPSIV   | 0.999921 | 2 | TRUE  | 2 |
| chrII  | 14060664 | 14062548 | FrameShift | K.KQKKAKN   | 0.996613 | 1 | TRUE  | 1 |
| chrI   | 7866353  | 7872075  | Translated | _.GKFDFLSI  | 1        | 4 | TRUE  | 4 |
| chrV   | 11740874 | 11754181 | FrameShift | L.KSLEMMI   | 0.994179 | 1 | TRUE  | 1 |
| chrIV  | 156073   | 157897   | ReverseStr | _.YKWNKLE   | 0.999932 | 2 | TRUE  | 2 |
| chrIII | 13236243 | 13237485 | NovelGene  | R.SRRNGGF   | 0.999991 | 2 | FALSE | 2 |
| chrV   | 15705040 | 15709509 | FrameShift | _.WKKSTRF   | 0.996207 | 1 | TRUE  | 1 |
| chrV   | 2881391  | 2883752  | GeneBound  | R.RSAGGEF   | 0.999992 | 2 | FALSE | 2 |
| chrII  | 5062121  | 5067121  | FrameShift | K.IDIAFFKIS | 0.997038 | 1 | TRUE  | 1 |
| chrV   | 18140252 | 18140659 | ReverseStr | R.DPMGRG    | 0.999946 | 3 | FALSE | 2 |
| chrX   | 5575934  | 5585137  | ReverseStr | E.MIDVLYS   | 0.999955 | 2 | TRUE  | 2 |
| chrIV  | 9770010  | 9770436  | GeneBound  | K.TEEQIPLT  | 1        | 3 | FALSE | 3 |
| chrIV  | 1993089  | 2008292  | NovelExon  | R.LQIPCAI   | 0.995074 | 1 | TRUE  | 1 |
| chrIV  | 9108916  | 9109736  | ExonBound  | _.SDSSGKV   | 0.996292 | 1 | TRUE  | 1 |
| chrII  | 10612961 | 10618276 | NovelExon  | _.IWSAHGI   | 0.995037 | 1 | TRUE  | 1 |
| chrV   | 6490051  | 6493904  | ReverseStr | K.LKKGSPKI  | 1        | 3 | TRUE  | 3 |
| chrIV  | 393151   | 393529   | ReverseStr | _.MDGWV     | 0.999982 | 6 | FALSE | 2 |
| chrIV  | 3881846  | 3884677  | FrameShift | R.NWKRFSD   | 0.99594  | 1 | TRUE  | 1 |
| chrII  | 14068874 | 14088817 | NovelExon  | K.NSNFPLK   | 0.999946 | 2 | TRUE  | 2 |
| chrIII | 6534414  | 6536942  | FrameShift | _.KLSAPFQ   | 0.995615 | 1 | TRUE  | 1 |
| chrIV  | 4724854  | 4725305  | ExonBound  | K.IVGIVGEM  | 0.998676 | 1 | TRUE  | 1 |
| chrIII | 7650487  | 7655967  | ReverseStr | R.VQKSEAN   | 0.999994 | 2 | TRUE  | 2 |
| chrI   | 5736238  | 5741625  | Translated | _.NTNIYSSF  | 0.999968 | 2 | TRUE  | 2 |
| chrIII | 7506194  | 7506955  | NovelGene  | _.TKVNLNV   | 0.999951 | 2 | FALSE | 2 |
| chrII  | 12919508 | 12923304 | FrameShift | S.QYPQSAC   | 0.995788 | 1 | TRUE  | 1 |
| chrX   | 3844766  | 3857778  | ReverseStr | K.QIWKCSS   | 0.99995  | 2 | TRUE  | 2 |
| chrII  | 9259336  | 9261934  | ReverseStr | K.FYFVSQK   | 0.999978 | 2 | TRUE  | 2 |
| chrIV  | 11570489 | 11578689 | ReverseStr | R.KMDEND    | 0.999978 | 2 | TRUE  | 2 |
| chrIV  | 12605673 | 12614700 | FrameShift | H.QNMDPFI   | 0.994882 | 1 | TRUE  | 1 |

|        |          |          |             |             |          |   |       |   |
|--------|----------|----------|-------------|-------------|----------|---|-------|---|
| chrIV  | 5624844  | 5627145  | NovelExon   | R.TLNLTFL   | 1        | 1 | TRUE  | 1 |
| chrIII | 5853496  | 5855649  | ReverseStr  | K.TMQTMF    | 1        | 3 | TRUE  | 3 |
| chrV   | 20520223 | 20522253 | ReverseStr  | K.FLSFLLGII | 1        | 3 | FALSE | 3 |
| chrV   | 1886530  | 1887557  | NovelGene   | K.FQKIFMP   | 0.999976 | 2 | FALSE | 2 |
| chrX   | 3403457  | 3408591  | FrameShift  | R.EIQSEQG   | 0.999092 | 1 | TRUE  | 1 |
| chrV   | 3743563  | 3749420  | NovelExon   | K.NFEFFFN   | 0.996905 | 1 | TRUE  | 1 |
| chrI   | 128697   | 134065   | ReverseStr  | K.SRFSARYI  | 0.999956 | 2 | TRUE  | 2 |
| chrX   | 2489036  | 2494330  | NovelExon   | R.CFELFLKF  | 0.996071 | 1 | TRUE  | 1 |
| chrV   | 9556692  | 9561619  | ReverseStr  | K.NSDRSRK   | 0.999996 | 2 | TRUE  | 2 |
| chrV   | 3772044  | 3774688  | NovelExon   | K.FPANGKF   | 0.997272 | 1 | TRUE  | 1 |
| chrIV  | 15219654 | 15220314 | ReverseStr  | _.SFEKNLKI  | 0.999993 | 2 | TRUE  | 2 |
| chrII  | 634291   | 637310   | NovelExon   | _.VNTSTDII  | 0.994786 | 1 | TRUE  | 1 |
| chrII  | 10188251 | 10189346 | ReverseStr  | K.WQNQK\    | 0.999945 | 2 | FALSE | 2 |
| chrX   | 6449999  | 6450902  | GeneBounc   | R.NAKIIGNI  | 0.999999 | 2 | FALSE | 2 |
| chrI   | 5486490  | 5487153  | ReverseStr  | P.CLARPQE   | 1        | 3 | FALSE | 3 |
| chrI   | 7258919  | 7267077  | FrameShift  | K.AKTTKGK   | 0.996724 | 1 | TRUE  | 1 |
| chrII  | 12345342 | 12352395 | ReverseStr  | K.NKVLGVC   | 0.999996 | 2 | FALSE | 2 |
| chrV   | 11459562 | 11461824 | GeneBounc   | R.VEDYGIQ   | 0.999997 | 2 | FALSE | 2 |
| chrX   | 3317844  | 3324216  | ReverseStr  | R.RNRMRH    | 1        | 5 | TRUE  | 3 |
| chrIV  | 232509   | 237450   | NovelExon   | K.NLESLSQI  | 0.995361 | 1 | TRUE  | 1 |
| chrX   | 1604901  | 1619145  | ExonBounc   | R.HHAMMI    | 1        | 1 | TRUE  | 1 |
| chrX   | 9991799  | 9999120  | ReverseStr  | K.KGEEGTR   | 0.999996 | 2 | TRUE  | 2 |
| chrII  | 2867998  | 2870763  | FrameShift  | R.EIGAALFI  | 0.997117 | 1 | TRUE  | 1 |
| chrX   | 8017972  | 8025841  | GeneBounc   | _.TDHQTNI   | 0.999999 | 3 | FALSE | 3 |
| chrV   | 18022451 | 18042327 | NovelExon   | S.RKKMFEN   | 0.994664 | 1 | TRUE  | 1 |
| chrIV  | 764072   | 768584   | GeneBounc   | R.KKSGAVL   | 0.999999 | 2 | FALSE | 2 |
| chrV   | 10275377 | 10275621 | ReverseStr  | _.KTGRETIC  | 0.999997 | 2 | TRUE  | 2 |
| chrV   | 16764236 | 16788393 | ReverseStr  | K.KTTSRPS/  | 0.999998 | 2 | TRUE  | 2 |
| chrX   | 10010503 | 10011177 | NovelGene   | K.INLANQG   | 0.999973 | 2 | FALSE | 2 |
| chrI   | 14552083 | 14565832 | NovelExon   | R.KMPEKNI   | 0.99659  | 1 | TRUE  | 1 |
| chrX   | 8110400  | 8113981  | NovelSplice | R.VEKAGQI   | 0.994166 | 1 | TRUE  | 1 |
| chrIII | 11823348 | 11824426 | FrameShift  | R.FAGAAPK   | 0.995966 | 1 | TRUE  | 1 |
| chrX   | 1311603  | 1316631  | NovelExon   | R.FKVSMMNI  | 0.997219 | 1 | TRUE  | 1 |
| chrII  | 13272564 | 13304159 | NovelExon   | _.YVKKSQII  | 0.995683 | 1 | TRUE  | 1 |
| chrI   | 13778884 | 13792153 | NovelExon   | K.FEKLYKDI  | 0.996221 | 1 | TRUE  | 1 |
| chrII  | 6441396  | 6443889  | GeneBounc   | K.FFFVITVL  | 0.999983 | 2 | FALSE | 2 |
| chrV   | 10532873 | 10536211 | ReverseStr  | K.KRPRSIIA  | 0.999951 | 2 | TRUE  | 2 |
| chrV   | 8417590  | 8438438  | ReverseStr  | R.RSTQLPK   | 0.999996 | 2 | FALSE | 2 |
| chrIII | 5254431  | 5258883  | FrameShift  | K.FINFSNN   | 0.994497 | 1 | TRUE  | 1 |
| chrII  | 13133191 | 13134045 | NovelGene   | K.HKICIVTM  | 0.999972 | 2 | FALSE | 2 |
| chrIII | 13346984 | 13356266 | FrameShift  | _.MPIFRSV   | 0.996302 | 1 | TRUE  | 1 |
| chrV   | 12386293 | 12386746 | ReverseStr  | _.KMWWR     | 0.999937 | 2 | TRUE  | 2 |
| chrX   | 2093469  | 2094838  | GeneBounc   | K.MMTVTE    | 0.999956 | 2 | FALSE | 2 |
| chrI   | 7522112  | 7526198  | ReverseStr  | K.IFSKTLGT  | 0.999983 | 2 | TRUE  | 2 |
| chrX   | 12705553 | 12808179 | NovelExon   | K.VIGRVKFI  | 0.995935 | 1 | TRUE  | 1 |
| chrIV  | 7119988  | 7121401  | ReverseStr  | K.YSNKCPV   | 0.999951 | 2 | FALSE | 2 |
| chrIII | 3456465  | 3460092  | GeneBounc   | R.SILSEIAK. | 0.999911 | 2 | FALSE | 2 |

|        |          |          |             |             |          |   |       |   |
|--------|----------|----------|-------------|-------------|----------|---|-------|---|
| chrIII | 12893101 | 12893940 | NovelGene   | _.KPEISKLF  | 0.999988 | 2 | FALSE | 2 |
| chrX   | 9034499  | 9038485  | ExonBounc   | R.LCKVEKM   | 0.994505 | 1 | TRUE  | 1 |
| chrV   | 4499316  | 4511435  | ReverseStr: | K.KHMINVI   | 0.999984 | 2 | FALSE | 2 |
| chrX   | 9146059  | 9147498  | FrameShift  | K.SIIQQTG/  | 0.999248 | 1 | TRUE  | 1 |
| chrIV  | 11946083 | 11949794 | FrameShift  | _.INFSFNRS  | 0.996838 | 1 | TRUE  | 1 |
| chrI   | 12819206 | 12824795 | ReverseStr: | R.RFSKATN   | 0.999938 | 2 | TRUE  | 2 |
| chrI   | 10179830 | 10180473 | GeneBounc   | K.STLYPNAI  | 0.999979 | 2 | FALSE | 2 |
| chrV   | 13557291 | 13559910 | GeneBounc   | R.EASSLPS\  | 0.999998 | 2 | FALSE | 2 |
| chrIV  | 9074658  | 9076556  | FrameShift  | K.VIYFSDFP  | 0.995129 | 1 | TRUE  | 1 |
| chrX   | 13522779 | 13527345 | ReverseStr: | _.TDLLSMT   | 0.999944 | 2 | TRUE  | 2 |
| chrV   | 15602    | 16527    | NovelGene   | K.DGGGGE    | 0.999997 | 2 | FALSE | 2 |
| chrX   | 1775118  | 1775587  | NovelGene   | K.FKRNPQK   | 0.999928 | 2 | FALSE | 2 |
| chrII  | 4186669  | 4208502  | NovelExon   | K.PSLSQVL   | 0.996455 | 1 | TRUE  | 1 |
| chrIV  | 4360828  | 4386533  | GeneBounc   | K.GASVVVA   | 1        | 4 | FALSE | 4 |
| chrV   | 163842   | 172211   | NovelExon   | K.MLKKLKS   | 0.994789 | 1 | TRUE  | 1 |
| chrX   | 1986461  | 1989599  | ReverseStr: | R.SADSQGS   | 0.999992 | 2 | TRUE  | 2 |
| chrIII | 8351177  | 8355102  | FrameShift  | R.LNGSIYQI  | 0.996703 | 1 | TRUE  | 1 |
| chrI   | 9132531  | 9135742  | ReverseStr: | R.VYQVLDK   | 0.999935 | 2 | TRUE  | 2 |
| chrII  | 2553967  | 2556318  | GeneBounc   | K.ECRLLGTI  | 0.999988 | 2 | FALSE | 2 |
| chrIII | 5564985  | 5566013  | GeneBounc   | F.LQEQTGY   | 1        | 6 | FALSE | 4 |
| chrX   | 13708652 | 13711895 | ReverseStr: | R.IICETTQIH | 0.999956 | 2 | TRUE  | 2 |
| chrI   | 4648270  | 4650771  | FrameShift  | R.SSWHSLA   | 0.998103 | 1 | TRUE  | 1 |
| chrI   | 10750949 | 10776028 | ReverseStr: | K.YSSFGYFL  | 1        | 4 | TRUE  | 4 |
| chrV   | 19519895 | 19533080 | FrameShift  | K.SEKKPAM   | 0.996256 | 1 | TRUE  | 1 |
| chrII  | 4471401  | 4473745  | FrameShift  | K.NKLNSTF   | 0.998405 | 1 | TRUE  | 1 |
| chrII  | 4942101  | 4943936  | ReverseStr: | _.IGGGSSV   | 0.999998 | 2 | TRUE  | 2 |
| chrIV  | 15997633 | 16026815 | ReverseStr: | R.YIGVGGV   | 0.999921 | 2 | TRUE  | 2 |
| chrIII | 7379077  | 7381531  | ReverseStr: | K.LFPWRCI   | 0.999969 | 2 | FALSE | 2 |
| chrIII | 13260490 | 13262795 | GeneBounc   | R.NYSPKAS   | 0.999996 | 3 | FALSE | 2 |
| chrV   | 9849953  | 9856295  | ReverseStr: | K.THMNQL    | 0.999983 | 2 | FALSE | 2 |
| chrV   | 8035091  | 8039486  | GeneBounc   | V.NKWAFE'   | 0.999983 | 2 | FALSE | 2 |
| chrV   | 11462995 | 11466743 | NovelExon   | R.RLRSAGA   | 0.999607 | 1 | TRUE  | 1 |
| chrV   | 6386533  | 6389717  | ReverseStr: | K.IKDLNIYC  | 0.999961 | 2 | TRUE  | 2 |
| chrV   | 7822577  | 7824279  | NovelGene   | R.IVYSGFCC  | 0.999984 | 2 | FALSE | 2 |
| chrIV  | 13111496 | 13113058 | NovelExon   | R.YLIKFHSC  | 0.995074 | 1 | TRUE  | 1 |
| chrI   | 6061662  | 6068034  | NovelExon   | K.INKMSIM   | 0.997112 | 1 | TRUE  | 1 |
| chrV   | 1184877  | 1196119  | NovelExon   | K.IEIFSFSFF | 0.998149 | 1 | TRUE  | 1 |
| chrIV  | 3263848  | 3265369  | FrameShift  | R.SRKYEIPA  | 1        | 1 | TRUE  | 1 |
| chrIV  | 12355687 | 12360770 | GeneBounc   | K.NFNRRKE   | 0.999979 | 2 | FALSE | 2 |
| chrX   | 17230645 | 17235763 | ExonBounc   | R.TTFSHLQI  | 0.997865 | 1 | TRUE  | 1 |
| chrV   | 17692476 | 17695801 | FrameShift  | R.FPMCISG   | 0.99738  | 1 | TRUE  | 1 |
| chrIV  | 12860113 | 12865911 | ExonBounc   | K.AYLFFSEL  | 0.998219 | 1 | TRUE  | 1 |
| chrIII | 10124093 | 10132314 | TranslatedI | _.VAGIPLHI  | 0.999994 | 2 | TRUE  | 2 |
| chrIII | 9081751  | 9082437  | FrameShift  | _.LSSAVMA   | 1        | 5 | TRUE  | 3 |
| chrIII | 11060634 | 11061804 | GeneBounc   | _.CGGKIFRI  | 1        | 3 | FALSE | 3 |
| chrII  | 13636913 | 13638415 | ReverseStr: | R.RRRWAT    | 0.999992 | 4 | TRUE  | 2 |
| chrIII | 9782078  | 9783135  | GeneBounc   | R.SRICYWY   | 0.999992 | 2 | FALSE | 2 |

|        |          |          |            |             |          |   |       |   |
|--------|----------|----------|------------|-------------|----------|---|-------|---|
| chrIII | 5023285  | 5024031  | ExonBound  | _.MLLRRLG   | 0.994548 | 1 | TRUE  | 1 |
| chrX   | 9823702  | 9831191  | NovelExon  | R.WFLCLSV   | 0.99748  | 1 | TRUE  | 1 |
| chrII  | 2938147  | 2940851  | ReverseStr | K.KRKKREK   | 1        | 5 | TRUE  | 5 |
| chrV   | 20135941 | 20138418 | NovelExon  | N.RKFHVIFI  | 0.998507 | 1 | TRUE  | 1 |
| chrII  | 11759618 | 11761789 | FrameShift | R.WNSRQF    | 0.999987 | 2 | TRUE  | 2 |
| chrV   | 7196897  | 7198419  | GeneBound  | K.NSNFGKM   | 1        | 4 | FALSE | 3 |
| chrI   | 3320923  | 3330675  | ReverseStr | R.PTTTTTA   | 0.999994 | 3 | TRUE  | 2 |
| chrIII | 7311233  | 7313102  | FrameShift | R.KKGSNTC   | 0.995528 | 1 | TRUE  | 1 |
| chrIV  | 9560770  | 9566588  | ReverseStr | _.PGSQDPK   | 0.999911 | 2 | TRUE  | 2 |
| chrIV  | 5794921  | 5796751  | ReverseStr | R.GHAHETA   | 1        | 2 | FALSE | 2 |
| chrIV  | 604444   | 605876   | ExonBound  | R.ISRQAGY   | 0.996706 | 1 | TRUE  | 1 |
| chrI   | 7814984  | 7819588  | Translated | K.MEILNQC   | 0.999956 | 2 | TRUE  | 2 |
| chrX   | 12321598 | 12322925 | FrameShift | R.QSRCGSF   | 0.999348 | 1 | TRUE  | 1 |
| chrV   | 6235157  | 6237654  | NovelExon  | R.GWEALG    | 0.996936 | 1 | TRUE  | 1 |
| chrX   | 15923668 | 15924679 | GeneBound  | _.RMENWC    | 1        | 3 | FALSE | 3 |
| chrII  | 10581074 | 10582460 | GeneBound  | K.RIRKMKE   | 0.999927 | 2 | FALSE | 2 |
| chrIV  | 5609398  | 5610353  | ReverseStr | R.GDAKIIR   | 0.999963 | 2 | FALSE | 2 |
| chrX   | 17459086 | 17460693 | GeneBound  | E.CLVVNLS   | 1        | 3 | FALSE | 3 |
| chrIII | 11990067 | 11999492 | NovelExon  | R.NLNFPPK   | 0.999802 | 1 | TRUE  | 1 |
| chrIV  | 15951877 | 15954809 | FrameShift | W.SQVTLIT   | 1        | 1 | TRUE  | 1 |
| chrIII | 5544264  | 5546247  | FrameShift | R.GFMVML    | 0.999515 | 1 | TRUE  | 1 |
| chrV   | 13176697 | 13180173 | ReverseStr | _.KIVFNSHI  | 0.999935 | 2 | FALSE | 2 |
| chrI   | 6791026  | 6797471  | FrameShift | R.RLLGYLL   | 0.994861 | 1 | TRUE  | 1 |
| chrX   | 4339620  | 4343676  | GeneBound  | R.YISSTTSR  | 0.999963 | 2 | FALSE | 2 |
| chrIV  | 9076486  | 9078582  | ReverseStr | R.ISYQAMA   | 0.999976 | 3 | TRUE  | 2 |
| chrIV  | 9972016  | 9972631  | ReverseStr | K.DKGGKGS   | 0.999958 | 2 | TRUE  | 2 |
| chrI   | 13162488 | 13182797 | NovelExon  | K.FETKIHRK  | 0.998518 | 1 | TRUE  | 1 |
| chrX   | 11728084 | 11728824 | GeneBound  | R.DKMFFPK   | 0.999961 | 2 | FALSE | 2 |
| chrV   | 15090740 | 15091102 | ReverseStr | _.FICTIPDK  | 0.999983 | 2 | TRUE  | 2 |
| chrIV  | 13035931 | 13038966 | ReverseStr | R.THDPKRM   | 0.999999 | 3 | TRUE  | 3 |
| chrII  | 13575855 | 13584662 | NovelExon  | K.KFQKNFK   | 0.996611 | 1 | TRUE  | 1 |
| chrI   | 1034475  | 1040871  | NovelExon  | R.IEFLIAVCI | 0.999462 | 1 | TRUE  | 1 |
| chrI   | 4550479  | 4552784  | FrameShift | R.WKMASP    | 0.995689 | 1 | TRUE  | 1 |
| chrIII | 3829812  | 3830217  | ReverseStr | _.FNKVIKNI  | 1        | 4 | TRUE  | 3 |
| chrII  | 13057025 | 13071460 | FrameShift | R.LHHPLYSI  | 1        | 2 | TRUE  | 2 |
| chrX   | 15882031 | 15885305 | ReverseStr | R.NFFGSAT   | 0.999978 | 2 | TRUE  | 2 |
| chrIV  | 3645158  | 3648679  | ReverseStr | R.RSQCSCR   | 0.999933 | 2 | TRUE  | 2 |
| chrX   | 9029423  | 9033904  | NovelExon  | R.QGDFSIV   | 0.997696 | 1 | TRUE  | 1 |
| chrIV  | 8066908  | 8083464  | FrameShift | R.DVVVSSF   | 0.99626  | 1 | TRUE  | 1 |
| chrX   | 5663802  | 5673997  | ReverseStr | K.NRYAANI   | 0.999928 | 2 | TRUE  | 2 |
| chrX   | 11659544 | 11661594 | NovelExon  | R.QILSQMY   | 0.998026 | 1 | TRUE  | 1 |
| chrI   | 6236214  | 6249764  | NovelExon  | K.VSQGLN    | 0.998012 | 1 | TRUE  | 1 |
| chrI   | 4035746  | 4090963  | NovelExon  | R.FIVMPTF   | 0.997564 | 1 | TRUE  | 1 |
| chrV   | 18690010 | 18696042 | ReverseStr | R.IFPKNYGI  | 0.999996 | 2 | FALSE | 2 |
| chrX   | 8061073  | 8065638  | ReverseStr | R.EERLKKM   | 1        | 2 | TRUE  | 2 |
| chrII  | 12768673 | 12773775 | NovelExon  | K.NQYFSTN   | 0.995776 | 1 | TRUE  | 1 |
| chrI   | 14777127 | 14787793 | ReverseStr | R.WHFVGE    | 1        | 3 | TRUE  | 3 |

|        |          |          |                        |          |   |       |   |
|--------|----------|----------|------------------------|----------|---|-------|---|
| chrIV  | 9924861  | 9928202  | ReverseStr: R.VLKSSMR  | 1        | 5 | TRUE  | 5 |
| chrV   | 6097088  | 6099029  | GeneBound: _SSSFLASF   | 1        | 4 | FALSE | 3 |
| chrIII | 5855994  | 5859141  | GeneBound: K.FMNSFKM   | 0.99997  | 2 | FALSE | 2 |
| chrX   | 13642278 | 13646828 | NovelExon: K.KFTFEIEE  | 0.999664 | 1 | TRUE  | 1 |
| chrIII | 13346984 | 13356266 | NovelExon: _MPIFRSV    | 0.996302 | 1 | TRUE  | 1 |
| chrII  | 11683415 | 11685225 | GeneBound: R.WDQNTF    | 0.99994  | 2 | FALSE | 2 |
| chrV   | 13386050 | 13391380 | ReverseStr: K.LAANA EK | 0.999954 | 2 | TRUE  | 2 |
| chrIV  | 11326535 | 11327198 | GeneBound: R.FSKNWH    | 1        | 3 | FALSE | 3 |
| chrV   | 9550620  | 9556005  | FrameShift: R.KLTNWEI  | 0.997626 | 1 | TRUE  | 1 |
| chrIV  | 2650382  | 2664003  | ReverseStr: R.IWPKVGS  | 0.999954 | 2 | TRUE  | 2 |
| chrV   | 13791003 | 13796223 | FrameShift: R.RQIMNLE  | 0.995746 | 1 | TRUE  | 1 |
| chrIII | 2060663  | 2060947  | ReverseStr: K.FQKKWSI  | 1        | 3 | FALSE | 3 |
| chrX   | 16529940 | 16531438 | NovelGene: K.EVMLRPC   | 0.999991 | 2 | FALSE | 2 |
| chrV   | 8259296  | 8261284  | FrameShift: K.RSKHIFFM | 0.99748  | 1 | TRUE  | 1 |
| chrIII | 10740766 | 10742362 | ReverseStr: R.TVRKPDR  | 1        | 4 | TRUE  | 4 |
| chrX   | 9628111  | 9628730  | NovelGene: K.KNNNNK    | 0.999938 | 2 | FALSE | 2 |
| chrII  | 2842560  | 2843193  | ReverseStr: K.LLEDVEV' | 0.999956 | 2 | TRUE  | 2 |
| chrIV  | 3618292  | 3624692  | ReverseStr: K.REVEYLEI | 0.999965 | 3 | TRUE  | 2 |
| chrI   | 12652608 | 12654636 | FrameShift: K.VKMPESF  | 0.998825 | 1 | TRUE  | 1 |
| chrX   | 14496015 | 14499364 | NovelExon: R.PYKLCELK  | 0.996572 | 1 | TRUE  | 1 |
| chrII  | 10283419 | 10300072 | ReverseStr: R.KNMDKK   | 0.999966 | 2 | TRUE  | 2 |
| chrIV  | 5290839  | 5293686  | NovelExon: R.KLLGHGL   | 0.995199 | 1 | TRUE  | 1 |
| chrII  | 8278636  | 8280985  | GeneBound: _EMSWSW     | 0.999928 | 2 | FALSE | 2 |
| chrV   | 5595758  | 5596237  | ExonBound: K.FDDEMIC   | 0.996967 | 1 | TRUE  | 1 |
| chrIII | 10742711 | 10746576 | GeneBound: Q.DSSYFVE   | 1        | 4 | FALSE | 4 |
| chrIV  | 6317036  | 6321346  | ReverseStr: K.YSCFLPQI | 0.999999 | 4 | TRUE  | 2 |
| chrIII | 2473858  | 2486616  | FrameShift: K.QRYGQCI  | 0.995005 | 1 | TRUE  | 1 |
| chrI   | 13387808 | 13391439 | ReverseStr: K.FAMSFFS  | 0.999989 | 2 | TRUE  | 2 |
| chrI   | 10588166 | 10590455 | NovelExon: K.LTYFLSRR  | 0.996132 | 1 | TRUE  | 1 |
| chrI   | 4139516  | 4142821  | GeneBound: R.ENKMAFI   | 0.999977 | 2 | FALSE | 2 |
| chrV   | 9055302  | 9056360  | ReverseStr: R.DDTRNM   | 0.999989 | 2 | FALSE | 2 |
| chrIII | 10812417 | 10816746 | ReverseStr: R.KKNEMLI  | 1        | 5 | TRUE  | 5 |
| chrII  | 3972265  | 3972760  | ReverseStr: _FFPYFHIF  | 0.999949 | 2 | TRUE  | 2 |
| chrI   | 3698098  | 3699303  | ExonBound: K.IYLQMSIS  | 0.998511 | 1 | TRUE  | 1 |
| chrIII | 2812135  | 2814961  | ReverseStr: R.CFQDRH   | 0.999972 | 3 | TRUE  | 2 |
| chrX   | 6451774  | 6455142  | GeneBound: _LPIHSAKI   | 1        | 3 | FALSE | 3 |
| chrV   | 7957257  | 7958820  | ReverseStr: R.KFMCFES  | 0.999943 | 2 | FALSE | 2 |
| chrII  | 14390644 | 14407829 | FrameShift: P.QTRQFSS  | 0.995969 | 1 | TRUE  | 1 |
| chrI   | 4784136  | 4785712  | NovelGene: R.FGRSASG   | 0.999974 | 2 | FALSE | 2 |
| chrIV  | 7578440  | 7580258  | ReverseStr: K.KLVYKLEI | 0.99995  | 2 | TRUE  | 2 |
| chrV   | 20850802 | 20851866 | ReverseStr: R.DPMGRG   | 0.999982 | 3 | FALSE | 2 |
| chrII  | 1321042  | 1322872  | NovelSplice: K.HRQKREV | 0.994627 | 1 | TRUE  | 1 |
| chrX   | 17205355 | 17209291 | FrameShift: R.KKQTGTC  | 0.995022 | 1 | TRUE  | 1 |
| chrV   | 10291671 | 10292843 | FrameShift: R.ERTKWTI  | 0.996509 | 1 | TRUE  | 1 |
| chrV   | 20522590 | 20524482 | FrameShift: K.TENSVNC  | 0.996541 | 1 | TRUE  | 1 |
| chrI   | 7038899  | 7048833  | NovelExon: K.FKICCFQC  | 0.997253 | 1 | TRUE  | 1 |
| chrI   | 1405946  | 1413073  | NovelExon: K.CHEKSNF   | 0.999041 | 1 | TRUE  | 1 |

|        |          |          |            |             |          |   |       |   |
|--------|----------|----------|------------|-------------|----------|---|-------|---|
| chrI   | 1156582  | 1157465  | FrameShift | R.INPYMSS   | 0.998969 | 1 | TRUE  | 1 |
| chrII  | 8231263  | 8232719  | GeneBound  | _.RLKHFRQ   | 0.999985 | 2 | FALSE | 2 |
| chrX   | 13091062 | 13094355 | FrameShift | K.ERSNFSKI  | 0.997869 | 1 | TRUE  | 1 |
| chrIV  | 8854524  | 8862474  | FrameShift | R.RSFKVCD   | 0.995107 | 1 | TRUE  | 1 |
| chrV   | 4571129  | 4585153  | NovelExon  | K.IIIDWLQY  | 0.998712 | 1 | TRUE  | 1 |
| chrII  | 13882633 | 13887964 | FrameShift | R.LDASDAS   | 0.994048 | 1 | TRUE  | 1 |
| chrII  | 6137812  | 6157147  | NovelExon  | V.YQFVSYY   | 0.998933 | 1 | TRUE  | 1 |
| chrIII | 9136839  | 9141745  | NovelExon  | _.ALQCQTK   | 0.998874 | 1 | TRUE  | 1 |
| chrII  | 10094814 | 10098726 | GeneBound  | K.FFLKSVSF  | 1        | 4 | FALSE | 3 |
| chrX   | 13009207 | 13013884 | NovelExon  | R.REASEEV   | 0.999109 | 1 | TRUE  | 1 |
| chrV   | 14942116 | 14945651 | ReverseStr | R.QIPTGNC   | 0.999948 | 2 | TRUE  | 2 |
| chrII  | 10703559 | 10704515 | GeneBound  | K.MGKIHG/   | 1        | 3 | FALSE | 3 |
| chrIV  | 3906107  | 3906487  | GeneBound  | R.CMQKGH    | 0.999963 | 2 | FALSE | 2 |
| chrII  | 11410050 | 11411911 | ReverseStr | R.WRNILG    | 0.999942 | 2 | FALSE | 2 |
| chrIV  | 14855255 | 14861706 | GeneBound  | K.NYILKMA   | 0.999977 | 2 | FALSE | 2 |
| chrII  | 13279703 | 13285747 | ReverseStr | _.YVKKSQII  | 0.999969 | 2 | TRUE  | 2 |
| chrIII | 4844626  | 4846510  | GeneBound  | R.NAKSQCT   | 0.999986 | 2 | FALSE | 2 |
| chrIII | 11918727 | 11920142 | FrameShift | L.VAVVEQV   | 0.996836 | 1 | TRUE  | 1 |
| chrX   | 13217032 | 13218950 | FrameShift | K.KIKMMKI   | 0.998697 | 1 | TRUE  | 1 |
| chrIV  | 5397829  | 5398581  | ExonBound  | K.KDQKMS    | 0.99476  | 1 | TRUE  | 1 |
| chrIII | 1570307  | 1576641  | FrameShift | R.RQLMRIY   | 0.996945 | 1 | TRUE  | 1 |
| chrIII | 12686402 | 12687821 | ReverseStr | C.AAELLESE  | 1        | 8 | TRUE  | 5 |
| chrIV  | 10176661 | 10178077 | FrameShift | _.YRNPRGS   | 0.994855 | 1 | TRUE  | 1 |
| chrX   | 1261670  | 1265714  | NovelGene  | K.RGIEQKIK  | 1        | 3 | FALSE | 3 |
| chrV   | 15318944 | 15320536 | GeneBound  | _.LKITPSSG  | 0.999974 | 2 | FALSE | 2 |
| chrIV  | 7065385  | 7068024  | ReverseStr | K.IDQTTEKI  | 0.99995  | 2 | TRUE  | 2 |
| chrIV  | 14837134 | 14853633 | NovelExon  | K.SLNSTSLM  | 0.996608 | 1 | TRUE  | 1 |
| chrI   | 10569101 | 10570019 | GeneBound  | K.MPLVGV    | 0.999993 | 4 | FALSE | 2 |
| chrV   | 15441009 | 15441158 | NovelGene  | R.LFMILTIE  | 0.999938 | 2 | FALSE | 2 |
| chrII  | 10822282 | 10824020 | ReverseStr | R.SRWVRA    | 0.999911 | 2 | TRUE  | 2 |
| chrI   | 11269919 | 11271218 | FrameShift | R.TVHLVYC   | 0.996922 | 1 | TRUE  | 1 |
| chrIV  | 10214962 | 10219286 | ReverseStr | K.DHLDHQI   | 1        | 3 | TRUE  | 3 |
| chrX   | 2243145  | 2244459  | GeneBound  | R.EAALQM    | 1        | 5 | FALSE | 3 |
| chrIII | 11463562 | 11470705 | ReverseStr | K.NKNFGTI   | 1        | 4 | TRUE  | 4 |
| chrIII | 10856728 | 10858075 | GeneBound  | R.DIREAEM   | 0.99995  | 2 | FALSE | 2 |
| chrV   | 3231396  | 3234985  | ReverseStr | R.LRLSSRIR  | 1        | 3 | TRUE  | 3 |
| chrIV  | 2378464  | 2381957  | ReverseStr | R.ELSFKYN   | 0.999996 | 2 | TRUE  | 2 |
| chrI   | 2568874  | 2570748  | NovelExon  | P.IKIEILESA | 0.994652 | 1 | TRUE  | 1 |
| chrIV  | 9401972  | 9412850  | NovelExon  | R.RPSGDN    | 0.997065 | 1 | TRUE  | 1 |
| chrV   | 20105617 | 20120644 | ReverseStr | R.KSIKIFID  | 0.999974 | 2 | FALSE | 2 |
| chrIV  | 6548840  | 6552556  | GeneBound  | R.VNSVGY    | 0.999983 | 2 | FALSE | 2 |
| chrIII | 10059211 | 10061895 | ReverseStr | K.RCREKEIS  | 1        | 3 | TRUE  | 3 |
| chrV   | 7827271  | 7842365  | FrameShift | R.KLRPEPVI  | 1        | 2 | TRUE  | 2 |
| chrIV  | 9261789  | 9264248  | FrameShift | K.MLFHLIV   | 0.998514 | 1 | TRUE  | 1 |
| chrIV  | 5800335  | 5807082  | NovelExon  | _.PIFYIKIFN | 0.99654  | 1 | TRUE  | 1 |
| chrIII | 12673576 | 12686129 | NovelExon  | K.WPNPKC    | 0.995022 | 1 | TRUE  | 1 |
| chrX   | 12604893 | 12605103 | FrameShift | _.DGSERW    | 0.994712 | 1 | TRUE  | 1 |

|        |          |          |             |            |          |   |       |   |
|--------|----------|----------|-------------|------------|----------|---|-------|---|
| chrI   | 13943338 | 13951616 | NovelExon   | R.PFLTLKM  | 0.99749  | 1 | TRUE  | 1 |
| chrX   | 2918795  | 2923974  | NovelExon   | R.TVVNLMI  | 0.99444  | 1 | TRUE  | 1 |
| chrV   | 10572897 | 10575728 | ReverseStr: | R.KSKPHSN  | 0.999951 | 2 | TRUE  | 2 |
| chrIV  | 8060787  | 8061315  | NovelGene   | K.IKKYNSVS | 0.99997  | 2 | FALSE | 2 |
| chrX   | 4088773  | 4091104  | NovelGene   | K.WELEVEL  | 0.999939 | 2 | FALSE | 2 |
| chrI   | 4717624  | 4719576  | ReverseStr: | K.NSTFVEL  | 0.999969 | 2 | FALSE | 2 |
| chrX   | 8673008  | 8681601  | FrameShift  | R.IPIKTKKW | 0.995159 | 1 | TRUE  | 1 |
| chrIV  | 5112921  | 5122011  | ExonBound   | K.IKIKLFQT | 0.994035 | 1 | TRUE  | 1 |
| chrIII | 5680529  | 5682281  | GeneBound   | I.AESAVLSC | 1        | 3 | FALSE | 3 |
| chrI   | 12183679 | 12188998 | FrameShift  | R.AVQNSIV  | 0.9967   | 1 | TRUE  | 1 |
| chrIV  | 14051175 | 14056643 | ExonBound   | K.KGFNPGC  | 0.998093 | 1 | TRUE  | 1 |
| chrIV  | 4659041  | 4659453  | ExonBound   | R.TVMVQN   | 1        | 1 | TRUE  | 1 |
| chrII  | 5231411  | 5233260  | NovelExon   | K.HLKDPLLI | 0.998125 | 1 | TRUE  | 1 |
| chrX   | 15505966 | 15507812 | ReverseStr: | K.MTKMAY   | 0.999998 | 3 | TRUE  | 2 |
| chrI   | 10708393 | 10710364 | FrameShift  | K.EQEEEEI  | 0.995829 | 1 | TRUE  | 1 |
| chrIV  | 16469547 | 16470848 | FrameShift  | R.KWWRTA   | 0.999564 | 1 | TRUE  | 1 |
| chrV   | 1990002  | 1992888  | NovelExon   | R.ASVDTTA  | 1        | 1 | TRUE  | 1 |
| chrIV  | 13068744 | 13070266 | FrameShift  | R.LSRGSKS  | 0.995807 | 1 | TRUE  | 1 |
| chrX   | 16427875 | 16429675 | NovelGene   | K.YVVILNG  | 0.999988 | 2 | FALSE | 2 |
| chrI   | 8377596  | 8392747  | NovelExon   | R.VHIMKTF  | 0.996897 | 1 | TRUE  | 1 |
| chrII  | 14276575 | 14283901 | GeneBound   | K.ILNSGNLI | 0.999988 | 2 | FALSE | 2 |
| chrII  | 5169716  | 5171022  | FrameShift  | K.MQSQVIK  | 0.999097 | 1 | TRUE  | 1 |
| chrIII | 2411072  | 2418195  | NovelExon   | R.PMRTHCI  | 0.999932 | 1 | TRUE  | 1 |
| chrX   | 9296886  | 9297891  | ReverseStr: | K.KCTISKFC | 0.999989 | 2 | FALSE | 2 |
| chrIII | 11237050 | 11238033 | GeneBound   | R.LICLVSKN | 0.999988 | 2 | FALSE | 2 |
| chrI   | 14520577 | 14522169 | NovelGene   | K.PAGNMR   | 0.999945 | 2 | FALSE | 2 |
| chrIV  | 10513870 | 10515263 | ReverseStr: | _.NKKYEIDI | 0.999923 | 2 | TRUE  | 2 |
| chrII  | 12159419 | 12162595 | GeneBound   | R.WRMSEK   | 0.999999 | 3 | FALSE | 3 |
| chrIV  | 13476913 | 13502828 | FrameShift  | R.KTIYKTLF | 0.997679 | 1 | TRUE  | 1 |
| chrII  | 7335265  | 7335353  | NovelGene   | R.EAEGEGC  | 1        | 2 | FALSE | 2 |
| chrI   | 13779769 | 13781390 | ReverseStr: | R.STQFAVH  | 1        | 3 | FALSE | 3 |
| chrIV  | 10286933 | 10292986 | GeneBound   | K.SLKYEAD  | 0.999994 | 2 | FALSE | 2 |
| chrII  | 13770770 | 13783947 | NovelExon   | K.NGASKTI  | 0.995623 | 1 | TRUE  | 1 |
| chrIII | 8307521  | 8308367  | FrameShift  | K.HKNIVKS  | 0.998114 | 1 | TRUE  | 1 |
| chrV   | 5593693  | 5594486  | ExonBound   | _.NLFQSKY  | 0.99526  | 1 | TRUE  | 1 |
| chrI   | 1162892  | 1175871  | NovelExon   | K.NYFFPTIL | 0.994293 | 1 | TRUE  | 1 |
| chrX   | 9761431  | 9764864  | ReverseStr: | K.TKRSGIRI | 0.999997 | 2 | TRUE  | 2 |
| chrI   | 12585372 | 12585961 | GeneBound   | K.GYAAPVC  | 0.999917 | 2 | FALSE | 2 |
| chrX   | 13116286 | 13122221 | ReverseStr: | _.RCTIVLFL | 0.999994 | 2 | TRUE  | 2 |
| chrII  | 15090104 | 15108932 | FrameShift  | _.VGAQMA   | 0.995465 | 1 | TRUE  | 1 |
| chrIV  | 5747371  | 5757851  | ReverseStr: | R.MVKTHG   | 0.999982 | 2 | TRUE  | 2 |
| chrI   | 11075751 | 11134660 | ReverseStr: | K.NAEIRRK  | 0.999931 | 2 | TRUE  | 2 |
| chrIV  | 4854386  | 4856279  | FrameShift  | R.KWNSIVC  | 0.995318 | 1 | TRUE  | 1 |
| chrX   | 13545217 | 13550654 | ReverseStr: | R.FRAGHQI  | 0.999947 | 2 | TRUE  | 2 |
| chrI   | 1874149  | 1883474  | NovelExon   | R.RKSLFNG  | 0.994327 | 1 | TRUE  | 1 |
| chrII  | 8454561  | 8456113  | ReverseStr: | S.RSPYLKLT | 0.999906 | 2 | TRUE  | 2 |
| chrI   | 17483    | 26781    | ReverseStr: | _.EVGGLILL | 1        | 3 | FALSE | 3 |

|        |          |          |                        |          |   |       |   |
|--------|----------|----------|------------------------|----------|---|-------|---|
| chrIII | 6440093  | 6442948  | ReverseStr: R.KDEPVVV  | 1        | 3 | FALSE | 3 |
| chrI   | 11292653 | 11294174 | FrameShift R.SLTSSATF  | 0.996394 | 1 | TRUE  | 1 |
| chrII  | 14675188 | 14684221 | GeneBounc A.WVPARE     | 0.999988 | 2 | FALSE | 2 |
| chrII  | 1227924  | 1230787  | FrameShift R.RLSSHIGK  | 0.999286 | 1 | TRUE  | 1 |
| chrII  | 1420429  | 1423675  | NovelExon I.GLGLGIGI   | 0.997428 | 1 | TRUE  | 1 |
| chrII  | 1996542  | 1998535  | FrameShift K.DHLFGHF   | 0.997098 | 1 | TRUE  | 1 |
| chrX   | 12705553 | 12808179 | ReverseStr: K.MICNVIG  | 0.999992 | 2 | TRUE  | 2 |
| chrX   | 2711207  | 2748107  | NovelExon K.TTKKTNV    | 0.994001 | 1 | TRUE  | 1 |
| chrV   | 3395272  | 3395963  | ReverseStr: R.NGAFAGI  | 1        | 4 | FALSE | 4 |
| chrV   | 18903743 | 18906172 | FrameShift _.LLFRYVEE  | 0.996321 | 1 | TRUE  | 1 |
| chrV   | 5826816  | 5832844  | ReverseStr: K.LSGILDER | 0.999904 | 2 | TRUE  | 2 |
| chrX   | 15923668 | 15924679 | FrameShift K.GAGGRG    | 0.994344 | 1 | TRUE  | 1 |
| chrV   | 20490740 | 20492454 | ReverseStr: K.NVSTDLIF | 0.999972 | 2 | TRUE  | 2 |
| chrV   | 4571129  | 4580128  | FrameShift K.IIIDWLQY  | 0.998712 | 1 | TRUE  | 1 |
| chrIII | 2970669  | 2975777  | ReverseStr: K.KTKKLSK  | 0.999993 | 2 | TRUE  | 2 |
| chrIV  | 11602618 | 11603264 | FrameShift _.MPSREPT   | 0.99408  | 1 | TRUE  | 1 |
| chrV   | 16792744 | 16794987 | FrameShift R.TIICTSSD  | 0.998658 | 1 | TRUE  | 1 |
| chrX   | 16541257 | 16551140 | FrameShift K.LLTPPGG   | 0.996945 | 1 | TRUE  | 1 |
| chrIV  | 2396242  | 2399419  | NovelExon K.ECRLLGTI   | 0.996639 | 1 | TRUE  | 1 |
| chrI   | 2915178  | 2918808  | ReverseStr: R.IAEEKKSE | 0.999973 | 2 | FALSE | 2 |
| chrIII | 2151958  | 2197899  | FrameShift R.IEVFGTEK  | 0.994966 | 1 | TRUE  | 1 |
| chrV   | 107402   | 118162   | NovelExon K.TKFLFKSN   | 0.996633 | 1 | TRUE  | 1 |
| chrII  | 11688906 | 11695998 | FrameShift R.EDQVLEV   | 0.995883 | 1 | TRUE  | 1 |
| chrIV  | 3699799  | 3700649  | ReverseStr: R.RFKWQR   | 1        | 3 | FALSE | 3 |
| chrIV  | 11852161 | 11853131 | ExonBounc S.FLGVLLKN   | 0.994663 | 1 | TRUE  | 1 |
| chrX   | 7842582  | 7845507  | ExonBounc K.HLVAPAT    | 0.995286 | 1 | TRUE  | 1 |
| chrIV  | 17281418 | 17284164 | ReverseStr: K.TAQTFTT  | 1        | 2 | FALSE | 2 |
| chrIII | 12398832 | 12421422 | NovelExon R.KFSNPAN    | 0.996734 | 1 | TRUE  | 1 |
| chrX   | 6456650  | 6461833  | FrameShift _.LLNSYSGI  | 0.996356 | 1 | TRUE  | 1 |
| chrI   | 10793390 | 10798047 | FrameShift _.NMNYRF    | 0.998321 | 1 | TRUE  | 1 |
| chrII  | 11100083 | 11100404 | GeneBounc K.TIGFGGQ    | 1        | 4 | FALSE | 3 |
| chrX   | 2535368  | 2537640  | NovelGene K.TFFTNISC   | 0.999999 | 2 | FALSE | 2 |
| chrV   | 14564804 | 14579704 | ReverseStr: F.KKMYRA   | 0.999998 | 2 | TRUE  | 2 |
| chrIV  | 4015609  | 4028123  | ReverseStr: K.NSKGGE   | 1        | 3 | TRUE  | 3 |
| chrX   | 16505175 | 16507338 | ReverseStr: R.KFNLEKI  | 0.999997 | 2 | FALSE | 2 |
| chrV   | 5474499  | 5476674  | NovelGene K.MIEKLEE    | 1        | 4 | FALSE | 4 |
| chrII  | 13418893 | 13424382 | FrameShift R.NCQCSSF   | 0.99742  | 1 | TRUE  | 1 |
| chrII  | 2642005  | 2642943  | FrameShift K.RKLEYTIS  | 0.994516 | 1 | TRUE  | 1 |
| chrIII | 783777   | 786067   | FrameShift P.SSSSGVD   | 0.99715  | 1 | TRUE  | 1 |
| chrIII | 4856823  | 4859207  | FrameShift _.ENEMIRC   | 0.99631  | 1 | TRUE  | 1 |
| chrI   | 112365   | 112915   | GeneBounc K.LDVIWYK    | 1        | 4 | FALSE | 4 |
| chrIV  | 5224888  | 5225761  | FrameShift R.KRMMTK    | 0.994107 | 1 | TRUE  | 1 |
| chrIII | 11795696 | 11803140 | FrameShift R.IGMDLM    | 0.998251 | 1 | TRUE  | 1 |
| chrV   | 7447254  | 7448959  | GeneBounc _.LNNAGILI   | 0.999998 | 2 | FALSE | 2 |
| chrII  | 13321943 | 13325611 | GeneBounc K.RKSCCKD    | 0.999984 | 2 | FALSE | 2 |
| chrV   | 9234601  | 9243141  | FrameShift R.MSQKSF    | 0.994823 | 1 | TRUE  | 1 |
| chrV   | 6323209  | 6326373  | FrameShift R.NYYFPSK   | 0.998254 | 1 | TRUE  | 1 |



|        |          |          |                        |          |   |       |   |
|--------|----------|----------|------------------------|----------|---|-------|---|
| chrX   | 7851948  | 7861182  | ReverseStr: K.KFLDFAI  | 0.99995  | 2 | TRUE  | 2 |
| chrI   | 4583879  | 4584506  | ReverseStr: _DFLANSV   | 1        | 2 | TRUE  | 2 |
| chrIV  | 8609481  | 8611421  | FrameShift R.AHKDKM    | 0.994607 | 1 | TRUE  | 1 |
| chrV   | 682332   | 683895   | ReverseStr: _RGPVKAS   | 1        | 4 | FALSE | 4 |
| chrIV  | 992289   | 997652   | FrameShift K.RMSTLLL   | 0.995188 | 1 | TRUE  | 1 |
| chrIII | 12438957 | 12441003 | ReverseStr: R.NFFKTPA  | 1        | 2 | TRUE  | 2 |
| chrIII | 12688172 | 12697445 | ExonBounc K.NLIFSASR   | 0.994364 | 1 | TRUE  | 1 |
| chrII  | 8836063  | 8839231  | ReverseStr: F.LVIQKKEK | 0.999987 | 2 | TRUE  | 2 |
| chrIV  | 13688300 | 13688756 | ReverseStr: R.RKEYERR  | 1        | 3 | TRUE  | 3 |
| chrII  | 5839617  | 5841113  | FrameShift K.GFKFLNF   | 0.99737  | 1 | TRUE  | 1 |
| chrI   | 11917733 | 11923906 | GeneBounc R.QIVKLPIN   | 0.999942 | 2 | FALSE | 2 |
| chrIII | 721466   | 723929   | NovelGene R.SNWKIYK    | 0.999951 | 2 | FALSE | 2 |
| chrIII | 13254567 | 13256284 | GeneBounc K.GERRQA/    | 0.999991 | 2 | FALSE | 2 |
| chrII  | 7189379  | 7192466  | ExonBounc _NFSVSVV     | 1        | 1 | TRUE  | 1 |
| chrIII | 5107291  | 5108550  | GeneBounc D.QENDVTI    | 0.999926 | 2 | FALSE | 2 |
| chrV   | 4802357  | 4805933  | ReverseStr: R.VGDAIVA  | 1        | 3 | TRUE  | 3 |
| chrII  | 14507017 | 14507561 | FrameShift R.ERRRRRN   | 0.996503 | 1 | TRUE  | 1 |
| chrX   | 15222342 | 15223786 | NovelGene R.IAEELSNK   | 1        | 3 | FALSE | 3 |
| chrV   | 11764886 | 11767206 | GeneBounc K.LEFLQIYS   | 0.99998  | 4 | FALSE | 2 |
| chrIII | 3822385  | 3826243  | FrameShift R.KMPPML    | 0.994786 | 1 | TRUE  | 1 |
| chrIII | 13386049 | 13388252 | NovelExon K.ATYLATCI   | 0.99779  | 1 | TRUE  | 1 |
| chrIII | 2573175  | 2575676  | ReverseStr: _KFSAKKM   | 0.999984 | 2 | TRUE  | 2 |
| chrIV  | 9449572  | 9457484  | NovelExon _MSHWNF      | 0.996588 | 1 | TRUE  | 1 |
| chrV   | 8261370  | 8263546  | ReverseStr: K.FVQWEK'  | 0.999977 | 2 | FALSE | 2 |
| chrI   | 8174882  | 8177137  | ReverseStr: K.FMCSIFE\ | 0.99999  | 2 | TRUE  | 2 |
| chrV   | 19857592 | 19860925 | GeneBounc R.NFFIEDFY   | 0.999974 | 2 | FALSE | 2 |
| chrV   | 18201428 | 18203377 | NovelExon _DYGMSKI     | 0.999385 | 1 | TRUE  | 1 |
| chrIII | 5940939  | 5943791  | FrameShift K.DITLEVEA  | 1        | 3 | TRUE  | 3 |
| chrX   | 2303074  | 2315390  | ExonBounc K.VIDDLGN    | 0.995576 | 1 | TRUE  | 1 |
| chrV   | 2294821  | 2297007  | FrameShift R.RRMKAK'   | 0.996769 | 1 | TRUE  | 1 |
| chrIII | 3405565  | 3411613  | GeneBounc K.NIYIYTIRC  | 0.999991 | 2 | FALSE | 2 |
| chrI   | 11058517 | 11061428 | NovelExon _KMOVSPRI    | 0.994857 | 1 | TRUE  | 1 |
| chrI   | 4586274  | 4589393  | GeneBounc A.LYEYLFNE   | 1        | 2 | FALSE | 2 |
| chrV   | 19934764 | 19946598 | ReverseStr: R.RSGNML'  | 0.999921 | 2 | FALSE | 2 |
| chrIII | 8999741  | 9001923  | FrameShift _SWKEREI    | 0.996613 | 1 | TRUE  | 1 |
| chrV   | 10602437 | 10605558 | ExonBounc K.DYRGTIM    | 0.997347 | 1 | TRUE  | 1 |
| chrII  | 9285915  | 9289076  | ReverseStr: R.IMRIHAM  | 0.999959 | 2 | FALSE | 2 |
| chrIV  | 4864972  | 4867651  | NovelExon V.VYTRAIW    | 0.99875  | 1 | TRUE  | 1 |
| chrV   | 14194537 | 14197683 | Translated K.LGEQREK   | 0.99997  | 2 | TRUE  | 2 |
| chrX   | 16711608 | 16720593 | ReverseStr: K.EKWGEG   | 0.999943 | 2 | FALSE | 2 |
| chrV   | 1305391  | 1305878  | NovelGene K.RIDAKNH    | 0.999992 | 2 | FALSE | 2 |
| chrIII | 5861813  | 5863502  | ReverseStr: R.CLSENILS | 1        | 3 | FALSE | 3 |
| chrI   | 14852807 | 14854596 | FrameShift R.TIVLGGCI  | 0.994006 | 1 | TRUE  | 1 |
| chrV   | 16833617 | 16835122 | ExonBounc Y.DNKFKSS    | 0.998455 | 1 | TRUE  | 1 |
| chrII  | 6684202  | 6688606  | NovelExon K.NLPLVSN    | 1        | 1 | TRUE  | 1 |
| chrV   | 6566542  | 6568730  | ExonBounc S.FCLLYKGF   | 0.994441 | 1 | TRUE  | 1 |
| chrIV  | 1357815  | 1359224  | ReverseStr: K.QETADTT  | 0.999938 | 2 | TRUE  | 2 |

|        |          |          |            |             |          |   |       |   |
|--------|----------|----------|------------|-------------|----------|---|-------|---|
| chrI   | 2623103  | 2628579  | FrameShift | K.RSLAMDI   | 0.994196 | 1 | TRUE  | 1 |
| chrII  | 13792160 | 13817305 | NovelExon  | _.KRSKLSQ`  | 0.999885 | 1 | TRUE  | 1 |
| chrII  | 1577376  | 1579993  | NovelExon  | R.GLAAIHR   | 0.997027 | 1 | TRUE  | 1 |
| chrIV  | 10526087 | 10530572 | GeneBounc  | _.PKYLPSG(  | 0.999989 | 2 | FALSE | 2 |
| chrIV  | 11059278 | 11063499 | ReverseStr | R.KCLNRAV   | 0.999997 | 2 | FALSE | 2 |
| chrII  | 2930732  | 2933467  | GeneBounc  | R.QKTCTST   | 1        | 4 | FALSE | 4 |
| chrIII | 8138024  | 8139565  | GeneBounc  | K.FAVADEE   | 1        | 2 | FALSE | 2 |
| chrI   | 4645637  | 4646966  | ReverseStr | K.MLSRSCL   | 0.999996 | 2 | TRUE  | 2 |
| chrV   | 12345916 | 12350371 | NovelExon  | K.YQNTKM    | 0.996607 | 1 | TRUE  | 1 |
| chrV   | 1475086  | 1479582  | NovelExon  | R.AVVLEPA   | 0.997236 | 1 | TRUE  | 1 |
| chrX   | 6729958  | 6733276  | ReverseStr | L.EQGTAAI'  | 1        | 3 | TRUE  | 3 |
| chrIII | 13169817 | 13173005 | GeneBounc  | K.TASTAEEI  | 1        | 4 | FALSE | 3 |
| chrX   | 11210830 | 11215405 | NovelExon  | K.YFPINQE(  | 0.995478 | 1 | TRUE  | 1 |
| chrI   | 1767889  | 1790205  | FrameShift | K.IVKECRFC  | 0.998012 | 1 | TRUE  | 1 |
| chrIII | 3490323  | 3493221  | NovelExon  | K.NHGKNLI   | 0.99537  | 1 | TRUE  | 1 |
| chrX   | 13436386 | 13440943 | NovelExon  | K.FIILMIINK | 0.994744 | 1 | TRUE  | 1 |
| chrIII | 5940939  | 5943791  | FrameShift | R.HDRERQ/   | 0.998663 | 3 | TRUE  | 1 |
| chrV   | 18148783 | 18154368 | NovelExon  | K.NWRFC`    | 0.995595 | 1 | TRUE  | 1 |
| chrII  | 2781660  | 2783091  | FrameShift | K.MSTNFPF   | 0.994405 | 1 | TRUE  | 1 |
| chrII  | 6684202  | 6688606  | GeneBounc  | R.FSYVGC    | 0.999982 | 3 | FALSE | 2 |
| chrI   | 700277   | 715853   | NovelExon  | K.KLDTLVEI  | 0.998874 | 1 | TRUE  | 1 |
| chrX   | 1643887  | 1646354  | NovelGene  | K.RSWMG\    | 0.99999  | 2 | FALSE | 2 |
| chrV   | 6882021  | 6890939  | NovelExon  | R.KVRQQG:   | 0.997074 | 1 | TRUE  | 1 |
| chrIV  | 165125   | 169980   | FrameShift | R.RWWQG`    | 0.994893 | 1 | TRUE  | 1 |
| chrIV  | 13882169 | 13882638 | FrameShift | Q.DHTNHN    | 0.99939  | 1 | TRUE  | 1 |
| chrV   | 11644742 | 11645353 | ExonBounc  | R.LFFGPGC   | 1        | 1 | TRUE  | 1 |
| chrIII | 2658075  | 2681103  | FrameShift | R.RHAPNAI   | 0.994137 | 1 | TRUE  | 1 |
| chrX   | 17600396 | 17601428 | NovelExon  | L.LTTCNRR   | 0.997429 | 1 | TRUE  | 1 |
| chrIV  | 6536168  | 6538989  | GeneBounc  | P.KLQICKQ   | 0.999981 | 2 | FALSE | 2 |
| chrIV  | 4659623  | 4660195  | ReverseStr | R.SWRRLSS   | 1        | 2 | TRUE  | 2 |
| chrII  | 13272564 | 13304159 | NovelExon  | _.QIPQSVG   | 0.99557  | 1 | TRUE  | 1 |
| chrI   | 11912782 | 11917710 | GeneBounc  | R.KFDKKQL   | 0.999987 | 2 | FALSE | 2 |
| chrII  | 7785374  | 7794267  | ReverseStr | F.QADADLI   | 1        | 2 | TRUE  | 2 |
| chrIV  | 5290839  | 5293686  | FrameShift | R.KLLGHGL   | 0.995199 | 1 | TRUE  | 1 |
| chrII  | 10242533 | 10247580 | ReverseStr | R.CSSFLVQ   | 0.999962 | 2 | TRUE  | 2 |
| chrII  | 14434477 | 14438901 | Translated | K.NVSMEM    | 0.999979 | 2 | TRUE  | 2 |
| chrIII | 11181950 | 11195108 | ReverseStr | R.RMLTSLS   | 1        | 4 | TRUE  | 4 |
| chrII  | 11036128 | 11039413 | GeneBounc  | _.KNKMGS    | 1        | 4 | FALSE | 4 |
| chrIV  | 15192267 | 15202991 | GeneBounc  | R.SHALKRV   | 0.999994 | 2 | FALSE | 2 |
| chrIII | 12226567 | 12232017 | NovelExon  | K.TPPKNPK   | 0.998349 | 1 | TRUE  | 1 |
| chrX   | 16791275 | 16793064 | FrameShift | R.IASYQGG   | 0.999233 | 1 | TRUE  | 1 |
| chrV   | 810794   | 814697   | NovelExon  | _.RTHTSSC:  | 0.998069 | 1 | TRUE  | 1 |
| chrX   | 10731722 | 10732371 | NovelGene  | R.LFKRQKN   | 0.999986 | 2 | FALSE | 2 |
| chrI   | 11388760 | 11396651 | ReverseStr | K.LERNSLKI  | 0.999998 | 2 | TRUE  | 2 |
| chrX   | 1536412  | 1540282  | GeneBounc  | K.FMTQVKI   | 0.999999 | 3 | FALSE | 3 |
| chrIII | 12087738 | 12090335 | NovelGene  | K.GTEHGLR   | 0.999945 | 2 | FALSE | 2 |
| chrII  | 8571082  | 8572851  | GeneBounc  | R.QREESNK   | 1        | 4 | FALSE | 4 |

|        |          |          |            |            |          |    |       |    |
|--------|----------|----------|------------|------------|----------|----|-------|----|
| chrV   | 16059761 | 16062073 | GeneBounc  | K.GYCMGK   | 0.999979 | 2  | FALSE | 2  |
| chrV   | 6533598  | 6538045  | NovelExon  | V.SRFFLFSE | 0.996905 | 1  | TRUE  | 1  |
| chrIV  | 593345   | 595234   | FrameShift | K.KFEVATG  | 0.999444 | 1  | TRUE  | 1  |
| chrII  | 13157265 | 13160358 | NovelExon  | K.LKYNNKN  | 0.994053 | 1  | TRUE  | 1  |
| chrV   | 15253812 | 15254788 | FrameShift | K.IFIYLSGH | 0.99869  | 1  | TRUE  | 1  |
| chrX   | 8275117  | 8283268  | FrameShift | R.CICIWMC  | 0.99683  | 1  | TRUE  | 1  |
| chrII  | 8840139  | 8844455  | ReverseStr | R.LVLHQKL  | 0.999993 | 2  | FALSE | 2  |
| chrIII | 560137   | 572134   | FrameShift | I.EAENGTE  | 0.999671 | 1  | TRUE  | 1  |
| chrV   | 13006955 | 13008910 | ReverseStr | H.ISNQGSV  | 1        | 3  | TRUE  | 3  |
| chrII  | 13508490 | 13516411 | ReverseStr | I.QVNINIFV | 0.999999 | 2  | TRUE  | 2  |
| chrIII | 11505451 | 11508816 | FrameShift | R.SNLMKFS  | 0.998172 | 1  | TRUE  | 1  |
| chrIII | 2681437  | 2686455  | ReverseStr | R.YGKIVALI | 0.999995 | 2  | FALSE | 2  |
| chrIII | 2623161  | 2627746  | GeneBounc  | K.IRKYIVFF | 0.99995  | 2  | FALSE | 2  |
| chrV   | 17871375 | 17879897 | GeneBounc  | K.MKIPANC  | 1        | 4  | FALSE | 4  |
| chrII  | 11980411 | 11988797 | ReverseStr | _.VLCEKKIC | 1        | 5  | TRUE  | 2  |
| chrV   | 17924890 | 17934201 | FrameShift | R.SHRGNLY  | 0.998921 | 1  | TRUE  | 1  |
| chrV   | 18677081 | 18684332 | NovelExon  | K.EEKEISRN | 0.999963 | 2  | TRUE  | 2  |
| chrII  | 11728992 | 11731163 | ExonBounc  | K.AISFVGGI | 0.995747 | 1  | TRUE  | 1  |
| chrI   | 2878580  | 2880938  | ReverseStr | K.LIEKKIVV | 0.999951 | 2  | TRUE  | 2  |
| chrII  | 10283419 | 10300072 | ReverseStr | K.IVKLPHQI | 0.999943 | 2  | TRUE  | 2  |
| chrV   | 18022451 | 18042327 | GeneBounc  | R.KLNLPPN  | 0.999969 | 2  | FALSE | 2  |
| chrII  | 6700624  | 6701591  | ExonBounc  | K.IALAYEM  | 1        | 1  | TRUE  | 1  |
| chrIII | 2638504  | 2642839  | FrameShift | _.VNGEVPK  | 0.996833 | 1  | TRUE  | 1  |
| chrIII | 768554   | 770890   | FrameShift | R.ISLLVEMF | 0.99746  | 1  | TRUE  | 1  |
| chrX   | 7823603  | 7825709  | NovelExon  | Q.EMGKGS   | 0.999998 | 2  | TRUE  | 2  |
| chrV   | 11221284 | 11222816 | GeneBounc  | R.LPKIGCA  | 0.999983 | 2  | FALSE | 2  |
| chrIV  | 13105313 | 13106902 | FrameShift | R.KMLHILM  | 0.998555 | 1  | TRUE  | 1  |
| chrI   | 9715313  | 9728099  | NovelExon  | _.NNQNYSI  | 0.998045 | 1  | TRUE  | 1  |
| chrV   | 6141454  | 6143531  | FrameShift | R.KYAFFKG  | 0.997021 | 1  | TRUE  | 1  |
| chrII  | 8143829  | 8144621  | FrameShift | R.VDIGDILF | 1        | 2  | TRUE  | 2  |
| chrIV  | 16139059 | 16140678 | NovelGene  | R.LKHKISM  | 0.999971 | 2  | FALSE | 2  |
| chrI   | 6381436  | 6385715  | ReverseStr | R.TQKKMLI  | 1        | 5  | TRUE  | 4  |
| chrIII | 4020041  | 4021854  | GeneBounc  | _.AILSPLGC | 1        | 4  | FALSE | 4  |
| chrII  | 3347577  | 3349873  | FrameShift | K.QTQTKES  | 0.99407  | 1  | TRUE  | 1  |
| chrV   | 45463    | 46923    | NovelExon  | K.IVRNSVN  | 0.994033 | 1  | TRUE  | 1  |
| chrV   | 2662963  | 2665001  | ReverseStr | R.ISVHRLP  | 0.999948 | 2  | TRUE  | 2  |
| chrIII | 2034967  | 2047997  | ReverseStr | R.ELKKVLK  | 0.999973 | 2  | TRUE  | 2  |
| chrIV  | 8261131  | 8266449  | FrameShift | _.FSDDDVT  | 1        | 18 | TRUE  | 12 |
| chrIV  | 13119190 | 13124292 | NovelExon  | _.TKYKLMN  | 0.998361 | 1  | TRUE  | 1  |
| chrV   | 9693037  | 9694783  | ExonBounc  | R.SSNCDCS  | 0.996485 | 1  | TRUE  | 1  |
| chrII  | 12225294 | 12227227 | GeneBounc  | R.TIMWRN   | 0.999927 | 2  | FALSE | 2  |
| chrIII | 8675441  | 8683612  | ReverseStr | R.FKLLHGTI | 0.999986 | 2  | TRUE  | 2  |
| chrV   | 4247955  | 4250133  | ReverseStr | K.RSTETFQI | 1        | 4  | TRUE  | 4  |
| chrI   | 10570068 | 10571908 | GeneBounc  | K.MPLVGI   | 1        | 5  | FALSE | 3  |
| chrX   | 8599888  | 8602220  | GeneBounc  | K.WGKMGI   | 0.999972 | 2  | FALSE | 2  |
| chrX   | 2204043  | 2205056  | GeneBounc  | R.KNKFFLT  | 0.999941 | 2  | FALSE | 2  |
| chrV   | 5594599  | 5595732  | GeneBounc  | K.FVHYNA   | 1        | 3  | FALSE | 3  |

|        |          |          |             |             |          |   |       |   |
|--------|----------|----------|-------------|-------------|----------|---|-------|---|
| chrI   | 7070648  | 7074732  | NovelExon   | _.SSRLWNC   | 0.995553 | 1 | TRUE  | 1 |
| chrII  | 8860853  | 8865113  | NovelExon   | L.FKKFSCPC  | 0.994288 | 1 | TRUE  | 1 |
| chrIII | 12673576 | 12686129 | GeneBound   | _.FSVLNMF   | 1        | 3 | FALSE | 3 |
| chrIII | 7893704  | 7894560  | GeneBound   | R.TLCDTFLC  | 0.999999 | 3 | FALSE | 3 |
| chrIII | 5265074  | 5267164  | FrameShift  | K.FSEKLESE  | 0.995678 | 1 | TRUE  | 1 |
| chrIV  | 8356753  | 8357907  | ExonBound   | R.DASKMA    | 0.995785 | 1 | TRUE  | 1 |
| chrX   | 15343085 | 15344078 | ReverseStr  | R.HLSGSAL   | 1        | 4 | TRUE  | 4 |
| chrIV  | 14339941 | 14342120 | ReverseStr  | F.DKKDRGC   | 0.999972 | 2 | FALSE | 2 |
| chrI   | 1053924  | 1066904  | GeneBound   | R.ARGPEHT   | 0.999968 | 2 | FALSE | 2 |
| chrV   | 9439136  | 9439525  | GeneBound   | K.RRYDYGK   | 0.999962 | 2 | FALSE | 2 |
| chrIII | 3867833  | 3869527  | NovelSplice | R.IKAFTKYA  | 0.997722 | 1 | TRUE  | 1 |
| chrV   | 6436628  | 6437867  | GeneBound   | R.YRVDLAH   | 1        | 2 | FALSE | 2 |
| chrIV  | 7447845  | 7449363  | FrameShift  | R.MTMLMI    | 0.994683 | 1 | TRUE  | 1 |
| chrX   | 10644344 | 10666806 | ReverseStr  | K.TRKYIRKS  | 0.999925 | 2 | TRUE  | 2 |
| chrIII | 12429071 | 12431220 | ReverseStr  | K.IILALFEH  | 1        | 4 | FALSE | 4 |
| chrV   | 13736994 | 13738458 | ReverseStr  | Q.CNLKFRT   | 1        | 3 | TRUE  | 3 |
| chrX   | 9284274  | 9287004  | NovelGene   | K.TEKEAET.  | 0.99993  | 2 | FALSE | 2 |
| chrIII | 7469678  | 7471604  | NovelGene   | F.IFSRILQT) | 0.999999 | 2 | FALSE | 2 |
| chrII  | 4892264  | 4892723  | GeneBound   | K.TKNSFLPI  | 0.999933 | 2 | FALSE | 2 |
| chrV   | 14296784 | 14297209 | ExonBound   | K.FEISINYM  | 0.999159 | 1 | TRUE  | 1 |
| chrX   | 8403486  | 8408314  | ReverseStr  | R.FYLNHAS   | 0.999975 | 2 | TRUE  | 2 |
| chrX   | 8768021  | 8769324  | NovelGene   | K.NENACG!   | 0.999964 | 2 | FALSE | 2 |
| chrV   | 17601797 | 17602926 | GeneBound   | _.SLKISEFP  | 0.999994 | 2 | FALSE | 2 |
| chrIII | 8812298  | 8812922  | NovelGene   | R.KYSAIDDI  | 0.999945 | 2 | FALSE | 2 |
| chrIV  | 4360828  | 4386533  | NovelExon   | R.DGSWVIL   | 0.999999 | 2 | TRUE  | 2 |
| chrIII | 11826318 | 11831375 | NovelExon   | R.LLFFGATI  | 0.9952   | 1 | TRUE  | 1 |
| chrIII | 727207   | 752421   | NovelExon   | R.SRVFVGE   | 0.994707 | 1 | TRUE  | 1 |
| chrIII | 10352093 | 10355446 | ReverseStr  | R.VSPGTKL   | 1        | 3 | FALSE | 3 |
| chrII  | 7964753  | 7967440  | NovelGene   | K.NEMEKD    | 1        | 4 | FALSE | 4 |
| chrIII | 1952005  | 1961936  | NovelExon   | R.KIDKFTEK  | 0.995222 | 1 | TRUE  | 1 |
| chrV   | 9305392  | 9310902  | NovelExon   | K.TLNTGISI  | 0.995751 | 1 | TRUE  | 1 |
| chrV   | 12588409 | 12589602 | GeneBound   | R.STRSSFIN  | 0.999955 | 2 | FALSE | 2 |
| chrX   | 16573343 | 16574016 | NovelGene   | R.PKMIALE   | 0.999939 | 2 | FALSE | 2 |
| chrIV  | 17278922 | 17281298 | FrameShift  | R.FSLEGIDF  | 1        | 1 | TRUE  | 1 |
| chrV   | 4505800  | 4511435  | ReverseStr  | R.RTRRLEYI  | 0.999994 | 3 | FALSE | 2 |
| chrIII | 5001334  | 5002298  | ReverseStr  | _.KKENFKN   | 0.999999 | 2 | TRUE  | 2 |
| chrIV  | 5486704  | 5490322  | FrameShift  | V.EVHVLLC   | 0.995651 | 1 | TRUE  | 1 |
| chrII  | 4223317  | 4226333  | GeneBound   | R.QISTCKSS  | 0.999978 | 2 | FALSE | 2 |
| chrII  | 14919629 | 14952867 | ReverseStr  | R.FSISLFFA  | 0.999969 | 2 | TRUE  | 2 |
| chrV   | 7081526  | 7084873  | ReverseStr  | R.RRKMGR    | 1        | 3 | TRUE  | 3 |
| chrI   | 11188615 | 11190991 | NovelGene   | K.FQEV RAP  | 0.999967 | 2 | FALSE | 2 |
| chrV   | 16219589 | 16221896 | FrameShift  | _.EPGLQFD   | 0.995303 | 1 | TRUE  | 1 |
| chrIV  | 8261131  | 8266441  | NovelExon   | K.YEGA EKS  | 0.999996 | 2 | TRUE  | 2 |
| chrV   | 18322187 | 18323299 | ReverseStr  | _.EQKKEVY   | 0.999957 | 2 | FALSE | 2 |
| chrIII | 6990190  | 7002255  | GeneBound   | K.NVNLIVFI  | 0.999999 | 2 | FALSE | 2 |
| chrX   | 9952504  | 9954482  | ExonBound   | F.FKVIPGV   | 0.999812 | 1 | TRUE  | 1 |
| chrII  | 12209174 | 12221724 | ReverseStr  | R.LFFQNFK   | 0.999992 | 2 | FALSE | 2 |

|        |          |          |                        |          |   |       |   |
|--------|----------|----------|------------------------|----------|---|-------|---|
| chrIII | 1520216  | 1532760  | ReverseStr:_.FEFDNKK   | 0.999991 | 7 | FALSE | 2 |
| chrI   | 2297282  | 2304397  | NovelExon K.KRERENG    | 0.996965 | 1 | TRUE  | 1 |
| chrIV  | 527379   | 528583   | FrameShift R.KTIDDVR   | 0.996552 | 1 | TRUE  | 1 |
| chrIV  | 8428948  | 8431482  | ReverseStr: R.WKYWKF   | 0.999967 | 3 | TRUE  | 2 |
| chrIV  | 11459970 | 11463173 | ReverseStr: K.IVSKHIF  | 0.999948 | 2 | TRUE  | 2 |
| chrIV  | 10458843 | 10461869 | ReverseStr: K.SVVSISSE | 0.999979 | 2 | TRUE  | 2 |
| chrI   | 1709587  | 1715570  | GeneBound R.VETFPVD    | 1        | 3 | FALSE | 3 |
| chrV   | 16282911 | 16285872 | ReverseStr:_.QANMFIF   | 0.999966 | 3 | TRUE  | 2 |
| chrI   | 7140277  | 7147229  | ReverseStr: R.LLPNPAE  | 0.999958 | 2 | TRUE  | 2 |
| chrI   | 1751483  | 1754412  | ReverseStr: K.QKKTIEL  | 1        | 3 | FALSE | 3 |
| chrI   | 10789119 | 10793136 | FrameShift K.ENPPQLC   | 0.994823 | 1 | TRUE  | 1 |
| chrX   | 2473756  | 2476006  | ReverseStr:_.NPRFSFL   | 0.99999  | 2 | FALSE | 2 |
| chrIII | 2764422  | 2768657  | ReverseStr: R.EEQRKN   | 0.999987 | 2 | TRUE  | 2 |
| chrIII | 9622069  | 9626453  | ReverseStr: K.KPTADAS  | 1        | 3 | FALSE | 3 |
| chrII  | 4911755  | 4914210  | ExonBound R.DNQPTV     | 0.999764 | 1 | TRUE  | 1 |
| chrI   | 12716312 | 12716450 | NovelExon _VSHEVVC     | 0.995775 | 1 | TRUE  | 1 |
| chrII  | 163195   | 170617   | NovelExon R.KKDLCVK    | 0.996157 | 1 | TRUE  | 1 |
| chrX   | 3747268  | 3747546  | NovelGene R.GVHERY     | 0.999997 | 2 | FALSE | 2 |
| chrX   | 8941341  | 8950924  | ReverseStr: R.KSIEGVDI | 1        | 4 | TRUE  | 4 |
| chrX   | 2429852  | 2439152  | GeneBound K.QLSKSFV    | 0.999958 | 2 | FALSE | 2 |
| chrIII | 5385578  | 5404946  | ReverseStr: R.KRTSYSG  | 0.999971 | 2 | TRUE  | 2 |
| chrII  | 5498693  | 5499133  | GeneBound S.SDTLQISS   | 0.999933 | 2 | FALSE | 2 |
| chrIII | 7230902  | 7232822  | GeneBound R.ARTSNIRI   | 0.999984 | 2 | FALSE | 2 |
| chrV   | 14686145 | 14688528 | FrameShift R.SSRTFWF   | 0.999954 | 2 | TRUE  | 2 |
| chrIII | 2208260  | 2211286  | NovelExon L.NRKFNKIF   | 0.996207 | 1 | TRUE  | 1 |
| chrV   | 17951322 | 17952794 | GeneBound K.YGKKVFS    | 1        | 3 | FALSE | 3 |
| chrI   | 10972016 | 10980104 | NovelExon _RLQILQT     | 0.995937 | 1 | TRUE  | 1 |
| chrII  | 8845538  | 8849094  | FrameShift R.LVLHQKL   | 0.998949 | 1 | TRUE  | 1 |
| chrI   | 3010692  | 3011661  | ReverseStr:_.LLIMMTF   | 0.999948 | 2 | FALSE | 2 |
| chrV   | 12479719 | 12484433 | FrameShift K.KCKKTYLI  | 0.99808  | 1 | TRUE  | 1 |
| chrIII | 4705378  | 4706915  | GeneBound K.EEAEKEK    | 0.999995 | 2 | FALSE | 2 |
| chrX   | 12795982 | 12813877 | ReverseStr:_.YTPGGTR   | 0.999991 | 2 | TRUE  | 2 |
| chrII  | 14027189 | 14027263 | NovelGene K.KMYPGN     | 0.999984 | 2 | FALSE | 2 |
| chrIV  | 11120609 | 11123133 | FrameShift R.LAFLSFFR  | 0.994265 | 1 | TRUE  | 1 |
| chrX   | 5307464  | 5323353  | NovelExon K.MTKYDN     | 0.996872 | 1 | TRUE  | 1 |
| chrI   | 9254506  | 9261633  | NovelExon R.RSTFPAIV   | 0.995053 | 1 | TRUE  | 1 |
| chrI   | 14071906 | 14072774 | NovelGene K.KTFQIVKI   | 1        | 3 | FALSE | 3 |
| chrIII | 12431538 | 12433764 | FrameShift K.KFWISSTI  | 0.995489 | 1 | TRUE  | 1 |
| chrIV  | 2495741  | 2497682  | FrameShift R.LPRQLDR   | 0.996464 | 1 | TRUE  | 1 |
| chrIV  | 11594302 | 11601764 | GeneBound S.KNVLPIH    | 0.999964 | 2 | FALSE | 2 |
| chrIII | 12905390 | 12906510 | ReverseStr: K.CPNKKLG  | 0.999955 | 2 | TRUE  | 2 |
| chrIV  | 7948662  | 7953568  | FrameShift K.HPKISNLF  | 0.998658 | 1 | TRUE  | 1 |
| chrV   | 2647057  | 2652655  | FrameShift R.RKDRSNV   | 0.994547 | 1 | TRUE  | 1 |
| chrIII | 13759344 | 13761968 | ReverseStr: K.LTVIARPF | 1        | 4 | TRUE  | 3 |
| chrV   | 15512161 | 15512755 | FrameShift R.AEKRFDL   | 0.996495 | 1 | TRUE  | 1 |
| chrII  | 3520706  | 3524183  | NovelExon R.GDAGSIP    | 0.996344 | 1 | TRUE  | 1 |
| chrIII | 10325542 | 10330328 | FrameShift K.SLESLNRE  | 0.997851 | 1 | TRUE  | 1 |

|        |          |          |                        |          |   |       |   |
|--------|----------|----------|------------------------|----------|---|-------|---|
| chrV   | 6745064  | 6748592  | ReverseStr: T.CLDTPSR  | 1        | 3 | FALSE | 3 |
| chrV   | 8671345  | 8673523  | ReverseStr: D.VQNKFH   | 0.999938 | 2 | FALSE | 2 |
| chrX   | 11468435 | 11484202 | ReverseStr: R.RHHMFP   | 1        | 4 | TRUE  | 4 |
| chrI   | 10762759 | 10776689 | FrameShift R.VPLFMN    | 0.995588 | 1 | TRUE  | 1 |
| chrI   | 310981   | 314992   | ReverseStr: K.SWYDGG   | 1        | 3 | TRUE  | 3 |
| chrIII | 12673576 | 12686129 | NovelExon K.LSLKMTK    | 0.995733 | 1 | TRUE  | 1 |
| chrX   | 15309306 | 15314827 | NovelExon R.FPNVSTC    | 0.996487 | 1 | TRUE  | 1 |
| chrII  | 6619353  | 6622138  | ReverseStr: V.PFNEFVD  | 0.999914 | 2 | TRUE  | 2 |
| chrI   | 6697127  | 6700662  | NovelGene _TIFRSHH     | 1        | 4 | FALSE | 4 |
| chrX   | 4122394  | 4128407  | ReverseStr: R.QYGASG   | 0.999995 | 2 | TRUE  | 2 |
| chrI   | 5141678  | 5149229  | NovelExon R.GETFRVE    | 0.99654  | 1 | TRUE  | 1 |
| chrX   | 1576630  | 1590890  | NovelExon R.GCGRKLM    | 0.996092 | 1 | TRUE  | 1 |
| chrX   | 3408680  | 3411669  | ReverseStr: _AFHESKL   | 1        | 8 | TRUE  | 7 |
| chrI   | 10861186 | 10863557 | ReverseStr: R.WKPTTT   | 0.999945 | 2 | FALSE | 2 |
| chrI   | 1740649  | 1751057  | GeneBound K.TDGNNEI    | 0.99994  | 2 | FALSE | 2 |
| chrV   | 15186565 | 15187770 | ReverseStr: _HTGPGVL   | 0.999997 | 2 | TRUE  | 2 |
| chrII  | 11002921 | 11012173 | NovelExon V.FDVRPPV    | 0.994152 | 1 | TRUE  | 1 |
| chrII  | 6589676  | 6591054  | GeneBound K.LMQRCH     | 1        | 6 | FALSE | 4 |
| chrI   | 3690148  | 3694017  | ReverseStr: K.FLVKGRV  | 0.999968 | 2 | TRUE  | 2 |
| chrIII | 4408523  | 4412189  | GeneBound R.SSQSLEE    | 1        | 3 | FALSE | 3 |
| chrIV  | 10274014 | 10275389 | ReverseStr: K.KCFQSSD  | 0.999941 | 2 | TRUE  | 2 |
| chrIII | 10083370 | 10084965 | GeneBound R.NLVLFKM    | 0.999955 | 2 | FALSE | 2 |
| chrIV  | 4450048  | 4459727  | NovelExon R.ERESGRM    | 0.9973   | 1 | TRUE  | 1 |
| chrII  | 3350253  | 3358984  | FrameShift R.HSGGIFQ   | 0.99494  | 1 | TRUE  | 1 |
| chrX   | 5112403  | 5116839  | ReverseStr: R.MITQKSP  | 0.999994 | 2 | TRUE  | 2 |
| chrI   | 15041421 | 15050691 | ReverseStr: R.ICMDVPL  | 1        | 4 | TRUE  | 3 |
| chrX   | 13522779 | 13527345 | GeneBound K.NYCKPVK    | 0.999958 | 2 | FALSE | 2 |
| chrIV  | 11850905 | 11855136 | FrameShift R.YTMRSSC   | 0.996082 | 1 | TRUE  | 1 |
| chrX   | 2543338  | 2548021  | ReverseStr: R.DIWQWT   | 0.999977 | 2 | TRUE  | 2 |
| chrI   | 2382967  | 2401490  | ReverseStr: K.SASRQFV  | 0.999972 | 2 | TRUE  | 2 |
| chrIII | 11488255 | 11500635 | TranslatedI _NIKQATE   | 1        | 3 | TRUE  | 3 |
| chrIII | 5487603  | 5498913  | FrameShift R.RKLHDPK   | 0.99505  | 1 | TRUE  | 1 |
| chrI   | 11154205 | 11155361 | GeneBound R.MSHFGLI    | 1        | 3 | FALSE | 3 |
| chrII  | 8039954  | 8041685  | FrameShift K.MGGINN    | 0.994446 | 1 | TRUE  | 1 |
| chrI   | 6836468  | 6838141  | FrameShift R.VIVTEIDP  | 0.999124 | 1 | TRUE  | 1 |
| chrIV  | 4446209  | 4446999  | GeneBound K.KNQEINI    | 0.999966 | 2 | FALSE | 2 |
| chrX   | 2237903  | 2240246  | GeneBound K.AFYFSVFF   | 0.999992 | 4 | FALSE | 2 |
| chrII  | 3458504  | 3459059  | GeneBound K.TTTLSPPT   | 1        | 4 | FALSE | 3 |
| chrIII | 11612507 | 11615694 | NovelExon R.VKYVAQY    | 0.996002 | 1 | TRUE  | 1 |
| chrX   | 7238682  | 7242917  | ReverseStr: K.IQSLNDQ  | 1        | 2 | TRUE  | 2 |
| chrV   | 13047963 | 13049220 | ReverseStr: R.RCICYTFV | 0.999987 | 2 | FALSE | 2 |
| chrV   | 11098963 | 11107258 | NovelExon K.ISKKIFGSI  | 0.994368 | 1 | TRUE  | 1 |
| chrIV  | 13673780 | 13677799 | FrameShift E.IGQKNQF   | 0.997839 | 1 | TRUE  | 1 |
| chrX   | 1528171  | 1530991  | NovelGene R.TLFPVSS    | 0.999962 | 2 | FALSE | 2 |
| chrIII | 2605221  | 2606491  | ExonBound K.RIPLAETS   | 0.997951 | 1 | TRUE  | 1 |
| chrII  | 3514966  | 3515487  | ReverseStr: K.HYTNKPV  | 1        | 3 | FALSE | 3 |
| chrII  | 1311221  | 1320445  | FrameShift R.KCHLQAI   | 0.997488 | 1 | TRUE  | 1 |

|        |          |          |            |             |          |   |       |   |
|--------|----------|----------|------------|-------------|----------|---|-------|---|
| chrIII | 9081751  | 9082437  | FrameShift | _.HKEYKTEI  | 0.995393 | 1 | TRUE  | 1 |
| chrIV  | 2887040  | 2889019  | GeneBound  | K.NFAVVYL   | 1        | 3 | FALSE | 3 |
| chrIII | 8720121  | 8725253  | GeneBound  | K.LFMERYS   | 0.999966 | 2 | FALSE | 2 |
| chrI   | 1483085  | 1491282  | ReverseStr | _.KSRVVDII  | 0.999997 | 2 | TRUE  | 2 |
| chrV   | 19898092 | 19904307 | ReverseStr | K.CKKKTKK   | 1        | 3 | TRUE  | 3 |
| chrII  | 1556451  | 1557485  | FrameShift | S.VLETLDGI  | 0.994849 | 1 | TRUE  | 1 |
| chrIII | 10531291 | 10532604 | GeneBound  | R.SQVDDVI   | 1        | 3 | FALSE | 3 |
| chrIV  | 13882707 | 13884152 | NovelExon  | _.HQFLMKI   | 0.996634 | 1 | TRUE  | 1 |
| chrIV  | 13369402 | 13370269 | ReverseStr | K.KNAEIDEI  | 1        | 3 | TRUE  | 2 |
| chrIII | 11181950 | 11195108 | NovelExon  | R.DFAQAAI   | 0.995255 | 1 | TRUE  | 1 |
| chrV   | 20898906 | 20903410 | NovelExon  | I.DFDFVMV   | 0.99441  | 1 | TRUE  | 1 |
| chrII  | 8191722  | 8193278  | GeneBound  | R.YMHTGA    | 0.999992 | 2 | FALSE | 2 |
| chrIII | 13527337 | 13539851 | NovelExon  | R.KKGKQVR   | 1        | 1 | TRUE  | 1 |
| chrIII | 12559601 | 12575265 | ReverseStr | K.KTFFSGKI  | 1        | 4 | TRUE  | 4 |
| chrIII | 5848795  | 5853225  | ExonBound  | K.IFRIQVVY  | 0.995624 | 1 | TRUE  | 1 |
| chrIII | 2608007  | 2618858  | NovelExon  | K.KNHQFPI   | 0.995879 | 1 | TRUE  | 1 |
| chrII  | 8630733  | 8634264  | NovelExon  | _.MYYGIYF   | 0.99504  | 1 | TRUE  | 1 |
| chrII  | 1489937  | 1500338  | NovelExon  | R.KYQKYQK   | 0.999043 | 1 | TRUE  | 1 |
| chrIV  | 15032462 | 15037004 | NovelExon  | R.SNRKPHV   | 0.999288 | 1 | TRUE  | 1 |
| chrIII | 4706943  | 4708399  | ExonBound  | K.SGVDTIKI  | 0.997406 | 1 | TRUE  | 1 |
| chrX   | 1359587  | 1362031  | NovelExon  | K.NYFQIEQ   | 0.997085 | 1 | TRUE  | 1 |
| chrII  | 11705927 | 11713548 | FrameShift | R.NFSDETLI  | 0.997505 | 1 | TRUE  | 1 |
| chrI   | 1895163  | 1923098  | NovelExon  | K.KMIKAGL   | 0.995475 | 1 | TRUE  | 1 |
| chrIII | 6013446  | 6019503  | FrameShift | K.DSQLNLT   | 0.995269 | 1 | TRUE  | 1 |
| chrII  | 13632585 | 13636912 | GeneBound  | R.SPYHQRC   | 0.999983 | 3 | FALSE | 2 |
| chrI   | 11075751 | 11134660 | NovelExon  | R.QMGKLP    | 0.998802 | 1 | TRUE  | 1 |
| chrV   | 6065490  | 6067072  | ExonBound  | R.SFQEWWM   | 0.994607 | 1 | TRUE  | 1 |
| chrX   | 1074221  | 1079336  | GeneBound  | K.KKRNEKI   | 0.999946 | 2 | FALSE | 2 |
| chrX   | 2180891  | 2185847  | ExonBound  | _.YILLQNAI  | 0.994673 | 1 | TRUE  | 1 |
| chrV   | 11081034 | 11082479 | FrameShift | R.VAPEEHP   | 0.998337 | 2 | TRUE  | 1 |
| chrV   | 12255603 | 12258774 | FrameShift | R.QMLQNC    | 0.996113 | 1 | TRUE  | 1 |
| chrI   | 8676657  | 8681328  | FrameShift | K.KAEKKVR   | 0.998343 | 1 | TRUE  | 1 |
| chrIV  | 4884288  | 4886889  | ReverseStr | K.QRKKRYC   | 0.999983 | 2 | FALSE | 2 |
| chrX   | 7727850  | 7733257  | FrameShift | R.VAIVCSK   | 0.994317 | 1 | TRUE  | 1 |
| chrIII | 11242183 | 11243859 | NovelGene  | R.QIKDMTC   | 0.999955 | 2 | FALSE | 2 |
| chrI   | 13379906 | 13384360 | NovelExon  | _.AQYKTIKI  | 0.995545 | 1 | TRUE  | 1 |
| chrI   | 3005429  | 3013450  | NovelExon  | K.QKFEICEK  | 0.994329 | 1 | TRUE  | 1 |
| chrII  | 14234898 | 14243515 | NovelExon  | K.MLEILMF   | 0.998395 | 1 | TRUE  | 1 |
| chrI   | 6836468  | 6838141  | ExonBound  | _.NTFAMA    | 0.998502 | 1 | TRUE  | 1 |
| chrI   | 7224732  | 7227763  | ReverseStr | _.RYTDTGK   | 0.999945 | 2 | FALSE | 2 |
| chrV   | 7875737  | 7876725  | ExonBound  | K.EVRDNYK   | 0.997297 | 1 | TRUE  | 1 |
| chrV   | 16020322 | 16022632 | FrameShift | R.INNAISILI | 0.996465 | 1 | TRUE  | 1 |
| chrIV  | 2881553  | 2890447  | GeneBound  | K.KNMAVH    | 0.999992 | 2 | FALSE | 2 |
| chrI   | 2883498  | 2893720  | NovelExon  | _.MREEGM    | 0.997075 | 1 | TRUE  | 1 |
| chrI   | 14652105 | 14657286 | FrameShift | R.RRILSVQI  | 1        | 1 | TRUE  | 1 |
| chrIV  | 15445348 | 15453155 | ReverseStr | R.CRVFGGI   | 0.999981 | 2 | TRUE  | 2 |
| chrI   | 9689188  | 9690118  | GeneBound  | R.QETWNK    | 0.999944 | 2 | FALSE | 2 |

|        |          |          |                        |          |   |       |   |
|--------|----------|----------|------------------------|----------|---|-------|---|
| chrIII | 8071850  | 8080208  | ReverseStr: K.LTMVAAI  | 0.99999  | 2 | TRUE  | 2 |
| chrII  | 3520706  | 3524183  | GeneBounc K.ISLMDRO    | 0.999989 | 2 | FALSE | 2 |
| chrII  | 8569876  | 8570999  | FrameShift Q.APILQVP   | 0.999999 | 2 | TRUE  | 2 |
| chrIII | 10289891 | 10291937 | NovelGene K.LGGGGGI    | 0.999982 | 2 | FALSE | 2 |
| chrI   | 10030162 | 10046749 | NovelExon K.LQNFTEŠ    | 0.999044 | 1 | TRUE  | 1 |
| chrX   | 1865240  | 1866632  | ReverseStr: R.GNGWTC   | 0.999982 | 2 | TRUE  | 2 |
| chrIV  | 7122182  | 7123935  | GeneBounc K.EENNQKI    | 0.999951 | 2 | FALSE | 2 |
| chrV   | 10023535 | 10028135 | GeneBounc K.ASDAWD     | 0.999996 | 2 | FALSE | 2 |
| chrI   | 3799208  | 3805721  | NovelExon K.KMFPEKI    | 0.997478 | 1 | TRUE  | 1 |
| chrIII | 6675748  | 6703943  | NovelExon K.NSENRAI    | 0.994785 | 1 | TRUE  | 1 |
| chrI   | 2330897  | 2332637  | GeneBounc K.KTNGVLE    | 0.999977 | 2 | FALSE | 2 |
| chrIII | 4754553  | 4756984  | GeneBounc E.GGDWTH     | 1        | 4 | FALSE | 4 |
| chrIV  | 3292445  | 3294630  | ReverseStr: R.QTLPFQF  | 1        | 5 | TRUE  | 5 |
| chrIV  | 8152431  | 8154845  | NovelExon K.PKNVCKL    | 1        | 1 | TRUE  | 1 |
| chrIV  | 344343   | 358882   | ExonBounc R.NEGRMF     | 0.994542 | 1 | TRUE  | 1 |
| chrV   | 64564    | 83770    | ReverseStr: K.FSRHVGS  | 0.999986 | 2 | TRUE  | 2 |
| chrIII | 13701892 | 13723972 | ReverseStr: R.FEKFSQS' | 0.999979 | 2 | TRUE  | 2 |
| chrII  | 9113157  | 9132148  | FrameShift R.SCSKSSKŠ  | 0.998637 | 1 | TRUE  | 1 |
| chrX   | 9850151  | 9851317  | FrameShift N.MILDMLŠ   | 0.997621 | 1 | TRUE  | 1 |
| chrV   | 6576850  | 6577763  | GeneBounc K.LPFGIGPI   | 1        | 4 | FALSE | 3 |
| chrIII | 7188295  | 7188925  | GeneBounc K.NKWMNI     | 0.99997  | 2 | FALSE | 2 |
| chrII  | 4314419  | 4316113  | NovelExon R.LFKENLEŠ   | 0.998481 | 1 | TRUE  | 1 |
| chrII  | 11465116 | 11468589 | GeneBounc K.LLFHQSKŠ   | 1        | 3 | FALSE | 3 |
| chrX   | 5959080  | 5970132  | NovelExon N.HQNWN      | 1        | 1 | TRUE  | 1 |
| chrII  | 10720442 | 10729193 | NovelExon K.NLVPNPF    | 0.9966   | 1 | TRUE  | 1 |
| chrV   | 19031713 | 19035222 | NovelExon R.CYRILAIPI  | 0.996122 | 1 | TRUE  | 1 |
| chrX   | 11916937 | 11920090 | FrameShift R.SSCFLAGŠ  | 0.995001 | 1 | TRUE  | 1 |
| chrIII | 3318592  | 3321236  | NovelExon R.PDFSLNSŠ   | 0.995691 | 1 | TRUE  | 1 |
| chrV   | 19693866 | 19697368 | ReverseStr: R.RNTRNHI  | 1        | 3 | TRUE  | 3 |
| chrII  | 7525718  | 7528194  | GeneBounc _DYSEKLLKŠ   | 0.999977 | 3 | FALSE | 2 |
| chrIV  | 2378464  | 2381957  | FrameShift R.MDSDWŠ    | 0.998529 | 1 | TRUE  | 1 |
| chrI   | 13548063 | 13559350 | GeneBounc R.QKMAKN     | 1        | 3 | FALSE | 3 |
| chrV   | 10395654 | 10397794 | ReverseStr: R.PNFFSVE  | 0.999953 | 2 | FALSE | 2 |
| chrV   | 210152   | 212714   | ReverseStr: _TRIINKMŠ  | 0.999954 | 2 | TRUE  | 2 |
| chrIV  | 9407199  | 9408087  | ReverseStr: R.SKCHQCF  | 1        | 8 | TRUE  | 5 |
| chrV   | 6235157  | 6237654  | FrameShift R.FDSLVLŠ   | 0.999453 | 1 | TRUE  | 1 |
| chrX   | 9303665  | 9310424  | FrameShift K.YCCVFPD   | 0.996169 | 1 | TRUE  | 1 |
| chrI   | 10772411 | 10776028 | ReverseStr: K.FKGLDFŠ  | 0.999963 | 2 | TRUE  | 2 |
| chrI   | 398894   | 412513   | FrameShift Y.IPPKATGI  | 0.997939 | 1 | TRUE  | 1 |
| chrIV  | 5397089  | 5397736  | GeneBounc K.KDQKMS     | 0.999981 | 2 | FALSE | 2 |
| chrV   | 6434113  | 6436383  | ExonBounc R.VDLAHVŠ    | 1        | 2 | TRUE  | 2 |
| chrIV  | 5399669  | 5400001  | NovelGene K.KVPKSIFR   | 0.999991 | 2 | FALSE | 2 |
| chrIV  | 2315424  | 2315988  | ReverseStr: R.VQAFSTŠ  | 1        | 3 | TRUE  | 3 |
| chrIV  | 4389128  | 4390624  | ReverseStr: _TCSPPRH   | 1        | 4 | TRUE  | 4 |
| chrI   | 11618    | 16842    | NovelExon K.SVETENA    | 0.99733  | 1 | TRUE  | 1 |
| chrIII | 12152798 | 12159556 | ExonBounc K.DKKRKAC    | 0.99497  | 1 | TRUE  | 1 |
| chrIV  | 13289762 | 13297844 | NovelExon R.GLRNKRA    | 0.996792 | 1 | TRUE  | 1 |



|        |          |          |                        |          |   |       |   |
|--------|----------|----------|------------------------|----------|---|-------|---|
| chrX   | 8844235  | 8848504  | ReverseStr: K.FYIFQNK  | 0.999978 | 2 | TRUE  | 2 |
| chrX   | 7230661  | 7238618  | NovelExon R.VEEKSEEI   | 0.996976 | 1 | TRUE  | 1 |
| chrIV  | 11248880 | 11259443 | ExonBounc K.MAKLMV     | 0.994398 | 1 | TRUE  | 1 |
| chrV   | 13689880 | 13692672 | ReverseStr: K.TKEMAQ   | 1        | 3 | FALSE | 3 |
| chrX   | 3393850  | 3397454  | ReverseStr: _QALYSYSI  | 1        | 3 | FALSE | 3 |
| chrI   | 11075884 | 11090291 | NovelExon K.LLAISLNC   | 0.996743 | 1 | TRUE  | 1 |
| chrII  | 14104698 | 14108428 | FrameShift R.FANKLET   | 0.996499 | 1 | TRUE  | 1 |
| chrIV  | 12769108 | 12769231 | NovelGene R.KKKKRVP    | 0.999974 | 2 | FALSE | 2 |
| chrIV  | 12521217 | 12522599 | ReverseStr: K.MESSKTC  | 1        | 4 | FALSE | 4 |
| chrI   | 11930716 | 11931750 | ReverseStr: R.RMRNRV   | 1        | 3 | TRUE  | 2 |
| chrV   | 4511963  | 4517328  | NovelExon K.LQLSGLPI   | 0.994486 | 1 | TRUE  | 1 |
| chrIII | 9498074  | 9500120  | ReverseStr: P.ACLTTDD  | 0.999988 | 2 | TRUE  | 2 |
| chrII  | 5864173  | 5866947  | ExonBounc _FSSESKM     | 0.997214 | 1 | TRUE  | 1 |
| chrIII | 8905549  | 8911669  | ExonBounc F.KNSFLQA    | 0.997944 | 1 | TRUE  | 1 |
| chrIII | 2836631  | 2838449  | GeneBounc R.DITLSSLR   | 0.999992 | 4 | FALSE | 2 |
| chrX   | 7823603  | 7825047  | FrameShift K.NMITGTS   | 0.998989 | 1 | TRUE  | 1 |
| chrIV  | 13031570 | 13034091 | FrameShift R.WEDLPIN   | 0.997767 | 1 | TRUE  | 1 |
| chrV   | 10951962 | 10953462 | FrameShift R.TNIVSPEI  | 0.996102 | 1 | TRUE  | 1 |
| chrI   | 14496798 | 14498279 | ReverseStr: K.QCLHHNI  | 1        | 3 | TRUE  | 3 |
| chrI   | 5886628  | 5895974  | GeneBounc _NKEMTT      | 0.999947 | 2 | FALSE | 2 |
| chrII  | 15064615 | 15071590 | ReverseStr: K.LLILYKMT | 0.999995 | 3 | TRUE  | 2 |
| chrII  | 13369535 | 13375220 | FrameShift R.ATNLWRI   | 0.998156 | 1 | TRUE  | 1 |
| chrV   | 14232264 | 14236037 | FrameShift R.QSSTSSG   | 0.997211 | 1 | TRUE  | 1 |
| chrIII | 8212687  | 8216265  | ReverseStr: R.IGFSATM  | 0.999999 | 2 | TRUE  | 2 |
| chrI   | 10191291 | 10192884 | ExonBounc R.ASDANN     | 0.997818 | 1 | TRUE  | 1 |
| chrII  | 8143829  | 8144621  | FrameShift _EWSMLTI    | 0.996553 | 1 | TRUE  | 1 |
| chrIV  | 344343   | 358882   | GeneBounc R.CEYEGEQ    | 0.999939 | 2 | FALSE | 2 |
| chrIII | 9208227  | 9215362  | NovelExon _LPFPNKV     | 0.994755 | 1 | TRUE  | 1 |
| chrV   | 6901669  | 6929020  | NovelExon R.YNFATKY    | 0.995914 | 1 | TRUE  | 1 |
| chrX   | 11603999 | 11605354 | ReverseStr: R.NSVANIG  | 1        | 6 | TRUE  | 4 |
| chrIII | 12171251 | 12177144 | NovelExon K.MCKKCAI    | 0.999095 | 1 | TRUE  | 1 |
| chrII  | 15179895 | 15183156 | NovelExon _RFAEFAG     | 0.998003 | 1 | TRUE  | 1 |
| chrIV  | 849273   | 854780   | NovelExon R.KDFRISRF   | 0.994493 | 1 | TRUE  | 1 |
| chrI   | 3653961  | 3655332  | FrameShift R.RMPLCCS   | 0.999979 | 2 | TRUE  | 2 |
| chrIII | 5408047  | 5413138  | NovelExon K.VSKNYGII   | 0.995317 | 1 | TRUE  | 1 |
| chrII  | 6979909  | 6988587  | ExonBounc _DTYYSNK     | 0.994584 | 1 | TRUE  | 1 |
| chrX   | 9235049  | 9242164  | ExonBounc R.MLTFCRK    | 0.998669 | 1 | TRUE  | 1 |
| chrII  | 9934345  | 9936836  | ReverseStr: K.FDPELLSM | 0.999991 | 2 | FALSE | 2 |
| chrV   | 16488451 | 16489083 | GeneBounc R.KILDWLG    | 0.999952 | 2 | FALSE | 2 |
| chrIV  | 9636963  | 9641986  | ReverseStr: K.MGLSHEI  | 0.999962 | 2 | TRUE  | 2 |
| chrV   | 19503082 | 19519920 | ReverseStr: K.PEPKTKPI | 0.999991 | 2 | TRUE  | 2 |
| chrV   | 14185770 | 14192143 | FrameShift N.RRAFGVC   | 0.996109 | 1 | TRUE  | 1 |
| chrV   | 6257962  | 6267174  | NovelExon A.FKKYCNF    | 0.996517 | 1 | TRUE  | 1 |
| chrX   | 250428   | 250975   | NovelGene R.FLTENSM    | 0.999969 | 2 | FALSE | 2 |
| chrIV  | 10472758 | 10478148 | ReverseStr: E.QLFLQYP  | 0.999997 | 2 | TRUE  | 2 |
| chrI   | 8095735  | 8098437  | FrameShift R.RMKFPM    | 0.999955 | 2 | TRUE  | 2 |
| chrIV  | 14837134 | 14853633 | NovelExon K.KSNREVE    | 0.994252 | 1 | TRUE  | 1 |

|        |          |          |                        |          |   |       |   |
|--------|----------|----------|------------------------|----------|---|-------|---|
| chrI   | 2587543  | 2595282  | ReverseStr: P.GKNSLPP  | 0.999926 | 2 | FALSE | 2 |
| chrV   | 18860259 | 18894947 | NovelExon _KCDFYLKI    | 0.996012 | 1 | TRUE  | 1 |
| chrX   | 8931187  | 8939207  | GeneBounc K.CVFLISIEI  | 1        | 4 | FALSE | 4 |
| chrII  | 11109526 | 11111111 | ReverseStr: K.NSIFSKTE | 0.999998 | 2 | FALSE | 2 |
| chrX   | 4984047  | 4993205  | GeneBounc R.RRSPHSS    | 1        | 4 | FALSE | 4 |
| chrIV  | 3903195  | 3905557  | ReverseStr: K.FLKKFIRY | 0.999963 | 2 | TRUE  | 2 |
| chrI   | 11979431 | 11985646 | NovelExon _RKFSIAAI    | 0.995551 | 1 | TRUE  | 1 |
| chrII  | 13057025 | 13071460 | FrameShift R.INNCLTEI  | 1        | 2 | TRUE  | 2 |
| chrII  | 1132368  | 1134159  | ReverseStr: R.LRRRLSDI | 1        | 5 | TRUE  | 5 |
| chrIV  | 4447342  | 4449872  | GeneBounc K.KNQEINII   | 1        | 6 | FALSE | 3 |
| chrIII | 6040284  | 6045075  | ReverseStr: R.FFTGLKSI | 0.999964 | 2 | TRUE  | 2 |
| chrIII | 10160599 | 10183440 | ExonBounc K.NQTPKKC    | 0.997313 | 1 | TRUE  | 1 |
| chrIII | 3290137  | 3294323  | ReverseStr: K.KNAKNPE  | 0.999965 | 2 | TRUE  | 2 |
| chrV   | 11827306 | 11829351 | GeneBounc R.VLASPIRF   | 0.999947 | 2 | FALSE | 2 |
| chrV   | 3673903  | 3676619  | ReverseStr: R.SDIDKSGI | 0.999992 | 3 | TRUE  | 2 |
| chrIII | 5121972  | 5130636  | FrameShift R.VSCAEAK   | 0.999388 | 1 | TRUE  | 1 |
| chrIV  | 138461   | 147919   | ExonBounc K.SSNFQGK    | 0.997981 | 1 | TRUE  | 1 |
| chrII  | 8238405  | 8243697  | GeneBounc K.FTEITQK    | 1        | 3 | FALSE | 3 |
| chrIII | 3867833  | 3869484  | NovelExon _QRLTRGC     | 0.998893 | 1 | TRUE  | 1 |
| chrII  | 12388229 | 12389775 | FrameShift K.LYRNSMI   | 0.999155 | 1 | TRUE  | 1 |
| chrIV  | 13239567 | 13240600 | ReverseStr: _SVPPLRG   | 0.999985 | 4 | TRUE  | 2 |
| chrII  | 13015292 | 13025768 | ReverseStr: R.TSTQSPP  | 1        | 3 | TRUE  | 3 |
| chrI   | 12921993 | 12923535 | TranslatedI _TRRNQGI   | 0.999999 | 2 | TRUE  | 2 |
| chrX   | 12445535 | 12445959 | NovelGene K.IEMEFIVI   | 0.999945 | 2 | FALSE | 2 |
| chrI   | 13626506 | 13628438 | ReverseStr: R.HLCEFPI  | 0.999992 | 2 | TRUE  | 2 |
| chrIV  | 1981406  | 1991720  | NovelExon _TQNCLKT     | 0.994746 | 1 | TRUE  | 1 |
| chrIV  | 2034982  | 2035986  | NovelExon R.VENCFAL    | 0.997533 | 1 | TRUE  | 1 |
| chrIV  | 3658952  | 3662763  | ReverseStr: K.NTENTGI  | 0.999971 | 2 | TRUE  | 2 |
| chrIV  | 7792337  | 7794797  | ReverseStr: K.QMLGFII  | 0.999996 | 3 | TRUE  | 2 |
| chrII  | 2443297  | 2451145  | FrameShift G.TLQASGV   | 0.994607 | 1 | TRUE  | 1 |
| chrII  | 1425739  | 1437506  | NovelExon K.NEEITGIR   | 0.994984 | 1 | TRUE  | 1 |
| chrV   | 10393508 | 10395209 | NovelExon R.PNFFSVE    | 0.994579 | 1 | TRUE  | 1 |
| chrIII | 8853723  | 8861021  | FrameShift R.IGENLST   | 1        | 1 | TRUE  | 1 |
| chrII  | 3791537  | 3792105  | FrameShift K.NQKTKN    | 0.999963 | 2 | TRUE  | 2 |
| chrIV  | 14549799 | 14551929 | ReverseStr: K.NVQKSA   | 0.999938 | 3 | FALSE | 2 |
| chrII  | 1132368  | 1134159  | GeneBounc K.HRCHKNI    | 1        | 3 | FALSE | 3 |
| chrV   | 5480734  | 5482399  | GeneBounc R.IHMILHM    | 0.999972 | 2 | FALSE | 2 |
| chrIV  | 12832314 | 12834550 | NovelGene R.SRVREVR    | 0.999995 | 2 | FALSE | 2 |
| chrI   | 2876934  | 2878519  | GeneBounc _RGSRHSC     | 1        | 5 | FALSE | 4 |
| chrIII | 13351292 | 13356266 | ReverseStr: R.RGDVPE   | 1        | 2 | TRUE  | 2 |
| chrV   | 18379091 | 18379261 | ReverseStr: R.AENIPL   | 0.999985 | 2 | TRUE  | 2 |
| chrIII | 3613203  | 3627125  | ReverseStr: _LGTFENS   | 0.99998  | 2 | TRUE  | 2 |
| chrV   | 877531   | 878633   | NovelExon R.IEAGGGG    | 0.998296 | 1 | TRUE  | 1 |
| chrIII | 10629979 | 10633402 | ReverseStr: R.ADGQTA   | 0.999974 | 2 | TRUE  | 2 |
| chrIV  | 15210090 | 15215594 | NovelExon G.RVCFRGS    | 0.999686 | 1 | TRUE  | 1 |
| chrX   | 8443884  | 8444616  | NovelGene K.MRRMVC     | 0.999983 | 2 | FALSE | 2 |
| chrIII | 5535618  | 5543128  | ReverseStr: K.SNGSGA   | 0.999999 | 3 | TRUE  | 3 |

|        |          |          |            |             |          |   |       |   |
|--------|----------|----------|------------|-------------|----------|---|-------|---|
| chrII  | 11739421 | 11743335 | FrameShift | R.WRYCKST   | 0.995411 | 1 | TRUE  | 1 |
| chrIII | 13165111 | 13169419 | ReverseStr | R.ISIVNLLR  | 1        | 4 | TRUE  | 3 |
| chrIII | 6807443  | 6815943  | FrameShift | R.SCRWNP'   | 0.994483 | 1 | TRUE  | 1 |
| chrIV  | 7461953  | 7465948  | GeneBounc  | K.MFPNKEF   | 0.999992 | 2 | FALSE | 2 |
| chrIII | 8443843  | 8446846  | ExonBounc  | F.QVFENVV   | 0.999839 | 1 | TRUE  | 1 |
| chrI   | 1062296  | 1065272  | NovelExon  | R.IACISLEKI | 0.998506 | 1 | TRUE  | 1 |
| chrI   | 108686   | 110077   | ReverseStr | K.VQHHLFE   | 1        | 8 | TRUE  | 6 |
| chrI   | 7866244  | 7872075  | ExonBounc  | K.DTGAAN/   | 0.999773 | 1 | TRUE  | 1 |
| chrIII | 6202370  | 6206151  | ReverseStr | R.KSFQRNF   | 1        | 5 | FALSE | 5 |
| chrX   | 16685870 | 16687972 | FrameShift | R.EMWRTF    | 0.996631 | 1 | TRUE  | 1 |
| chrII  | 11444098 | 11445191 | GeneBounc  | R.LKSSESKC  | 0.999972 | 3 | FALSE | 2 |
| chrI   | 4884904  | 4895496  | NovelExon  | _.FNEDEKV   | 0.996718 | 1 | TRUE  | 1 |
| chrII  | 2274881  | 2279151  | FrameShift | K.ADGIYQK   | 0.997242 | 1 | TRUE  | 1 |
| chrX   | 5738756  | 5743274  | ExonBounc  | R.FPSSAATI  | 0.997786 | 1 | TRUE  | 1 |
| chrX   | 11410117 | 11414747 | FrameShift | K.NWQNFN    | 0.998528 | 1 | TRUE  | 1 |
| chrIII | 4078416  | 4082770  | FrameShift | R.LLPKSALF  | 0.999997 | 2 | TRUE  | 2 |
| chrIV  | 8894068  | 8901372  | NovelExon  | K.KIKIPVNL  | 0.99466  | 1 | TRUE  | 1 |
| chrV   | 6121270  | 6202609  | FrameShift | K.QLWKMM    | 0.995043 | 1 | TRUE  | 1 |
| chrII  | 4752384  | 4752938  | GeneBounc  | K.LSKIDLSP  | 0.999971 | 2 | FALSE | 2 |
| chrII  | 14252280 | 14255564 | ReverseStr | K.FPVVFPF   | 0.999999 | 2 | TRUE  | 2 |
| chrX   | 3807449  | 3816415  | NovelExon  | K.KPTETPKI  | 0.996611 | 1 | TRUE  | 1 |
| chrX   | 370258   | 371112   | NovelGene  | K.ITLNNSGI  | 0.999982 | 2 | FALSE | 2 |
| chrIII | 10140941 | 10141337 | ReverseStr | K.QTIITEYK  | 0.999956 | 2 | TRUE  | 2 |
| chrII  | 2771087  | 2772271  | GeneBounc  | R.IYIPAMLK  | 0.999993 | 2 | FALSE | 2 |
| chrIV  | 6019693  | 6034527  | NovelExon  | K.WRDWGC    | 0.998008 | 1 | TRUE  | 1 |
| chrV   | 4110581  | 4112601  | GeneBounc  | R.CSRITVSS  | 0.999958 | 2 | FALSE | 2 |
| chrIII | 7894959  | 7895205  | GeneBounc  | R.HERESSK   | 0.999991 | 2 | FALSE | 2 |
| chrV   | 12302465 | 12306953 | FrameShift | R.ITRCSESN  | 0.994868 | 1 | TRUE  | 1 |
| chrX   | 17151448 | 17154513 | GeneBounc  | R.NGSTAAL   | 0.999964 | 2 | FALSE | 2 |
| chrIV  | 1087575  | 1093920  | ReverseStr | K.KLEFLLEN  | 1        | 3 | TRUE  | 3 |
| chrIII | 6415726  | 6421659  | NovelExon  | K.VISVTGSH  | 0.99779  | 1 | TRUE  | 1 |
| chrX   | 3807449  | 3816415  | FrameShift | K.KSQSLQS   | 0.996063 | 1 | TRUE  | 1 |
| chrIV  | 11688204 | 11691065 | NovelExon  | R.HYKMAG    | 0.997377 | 1 | TRUE  | 1 |
| chrX   | 8697765  | 8702770  | ReverseStr | G.QLEEHW    | 1        | 3 | TRUE  | 3 |
| chrV   | 4517668  | 4549277  | ExonBounc  | K.ASVSGEE   | 0.995675 | 1 | TRUE  | 1 |
| chrIV  | 8261131  | 8266441  | NovelExon  | R.GQVTFEL   | 0.997914 | 1 | TRUE  | 1 |
| chrV   | 19455988 | 19457271 | GeneBounc  | R.KAWLNV    | 0.999979 | 2 | FALSE | 2 |
| chrX   | 13844131 | 13844605 | ReverseStr | K.MSENKN'   | 0.999948 | 2 | FALSE | 2 |
| chrIV  | 10145227 | 10146203 | FrameShift | R.ALESSRRI  | 0.996799 | 1 | TRUE  | 1 |
| chrII  | 13278105 | 13304159 | Translated | K.MSKGGG    | 1        | 3 | TRUE  | 3 |
| chrV   | 20717841 | 20729240 | NovelExon  | K.FGNWNF    | 0.998128 | 1 | TRUE  | 1 |
| chrII  | 13015292 | 13025768 | NovelExon  | _.YCRKMQL   | 0.995646 | 1 | TRUE  | 1 |
| chrX   | 13507496 | 13510228 | ExonBounc  | I.IMFQNTL   | 0.996391 | 1 | TRUE  | 1 |
| chrV   | 8701410  | 8703038  | GeneBounc  | R.KKKNFLV   | 0.999977 | 2 | FALSE | 2 |
| chrV   | 16462417 | 16466336 | ExonBounc  | R.VMYKKAI   | 0.994943 | 1 | TRUE  | 1 |
| chrV   | 9175775  | 9177978  | FrameShift | K.LLEMHN'   | 0.994991 | 1 | TRUE  | 1 |
| chrIII | 4248128  | 4263021  | FrameShift | K.STKYGHG   | 0.997398 | 1 | TRUE  | 1 |

|        |          |          |             |            |          |   |       |   |
|--------|----------|----------|-------------|------------|----------|---|-------|---|
| chrIII | 6889720  | 6895039  | FrameShift  | K.MKFGRS   | 0.995444 | 1 | TRUE  | 1 |
| chrX   | 7727850  | 7733257  | FrameShift  | R.RPMIMSI  | 0.996474 | 1 | TRUE  | 1 |
| chrX   | 2621266  | 2664365  | ReverseStr  | R.NWRVAC   | 1        | 4 | TRUE  | 4 |
| chrV   | 10011847 | 10028135 | Translated  | K.TIPLCFLL | 0.999986 | 2 | TRUE  | 2 |
| chrX   | 14664220 | 14671231 | FrameShift  | R.YSGNYFN  | 0.996354 | 1 | TRUE  | 1 |
| chrIII | 7866443  | 7868661  | FrameShift  | K.MAGMA    | 0.996429 | 1 | TRUE  | 1 |
| chrX   | 7925389  | 7926541  | ReverseStr  | K.KTPIIPKF | 0.999974 | 2 | TRUE  | 2 |
| chrI   | 6874303  | 6876927  | ExonBound   | K.SDIWAFG  | 0.996327 | 1 | TRUE  | 1 |
| chrI   | 6900971  | 6913578  | ReverseStr  | _.DVGLEM   | 1        | 3 | TRUE  | 3 |
| chrI   | 14909229 | 14913062 | FrameShift  | R.AMLPSIV  | 0.994589 | 1 | TRUE  | 1 |
| chrIII | 911250   | 912228   | FrameShift  | _.PTGTLAD  | 0.997075 | 1 | TRUE  | 1 |
| chrX   | 11068461 | 11071859 | FrameShift  | F.GKNSVGS  | 0.995938 | 1 | TRUE  | 1 |
| chrX   | 9801033  | 9807604  | ReverseStr  | K.MWRFLG   | 0.999977 | 2 | TRUE  | 2 |
| chrIV  | 14658290 | 14675110 | GeneBound   | R.RETQTTV  | 0.999977 | 2 | FALSE | 2 |
| chrII  | 9589804  | 9591141  | ReverseStr  | F.NSVSWS   | 1        | 3 | FALSE | 3 |
| chrV   | 12846902 | 12849849 | ReverseStr  | K.SIETTKNK | 0.99998  | 2 | TRUE  | 2 |
| chrIV  | 14401085 | 14412859 | FrameShift  | K.FHLLMM   | 0.999122 | 1 | TRUE  | 1 |
| chrII  | 13309220 | 13311409 | GeneBound   | T.LEVTWM   | 0.999965 | 3 | FALSE | 2 |
| chrV   | 8899254  | 8902192  | GeneBound   | R.TRFELVS  | 0.999981 | 2 | FALSE | 2 |
| chrI   | 398894   | 412513   | FrameShift  | K.STRVLRQ  | 0.995562 | 1 | TRUE  | 1 |
| chrIV  | 9531251  | 9533156  | ReverseStr  | _.HVPIKNG  | 0.999937 | 2 | TRUE  | 2 |
| chrI   | 2069686  | 2070577  | ReverseStr  | K.PRSSSKH  | 1        | 5 | TRUE  | 3 |
| chrV   | 3673903  | 3676619  | FrameShift  | R.ECSKSQE  | 0.994581 | 1 | TRUE  | 1 |
| chrI   | 10567883 | 10569008 | FrameShift  | _.NTGMGP   | 0.999999 | 2 | TRUE  | 2 |
| chrIV  | 4399872  | 4400393  | ReverseStr  | R.ETGETQK  | 0.999965 | 2 | FALSE | 2 |
| chrII  | 9519037  | 9520151  | FrameShift  | R.SQPLLLN  | 0.99726  | 1 | TRUE  | 1 |
| chrI   | 6225098  | 6225966  | FrameShift  | R.CGWRW    | 0.996083 | 1 | TRUE  | 1 |
| chrX   | 6709499  | 6712887  | GeneBound   | R.GGFGTSR  | 0.99999  | 4 | FALSE | 2 |
| chrX   | 15348877 | 15350932 | NovelGene   | K.MTSRRLI  | 1        | 3 | FALSE | 3 |
| chrIV  | 16934226 | 16939077 | ReverseStr  | R.STNQWD   | 1        | 4 | TRUE  | 4 |
| chrV   | 16059761 | 16062073 | FrameShift  | K.NLMPGIM  | 0.999199 | 1 | TRUE  | 1 |
| chrV   | 18839281 | 18845372 | ReverseStr  | R.NEKFSEN  | 0.999963 | 2 | FALSE | 2 |
| chrII  | 12836409 | 12840088 | ReverseStr  | _.NPSDPLT  | 0.999978 | 2 | TRUE  | 2 |
| chrI   | 13514533 | 13526246 | FrameShift  | _.STRTHGK  | 0.997279 | 1 | TRUE  | 1 |
| chrII  | 11614572 | 11633545 | ReverseStr  | E.PVRLGGE  | 0.999998 | 2 | TRUE  | 2 |
| chrII  | 14347049 | 14348718 | ReverseStr  | K.IEKIGILW | 1        | 3 | FALSE | 3 |
| chrV   | 13823112 | 13825211 | FrameShift  | K.LECFIKEA | 0.996918 | 1 | TRUE  | 1 |
| chrI   | 1967821  | 1973885  | NovelExon   | K.MAENSN   | 0.997943 | 1 | TRUE  | 1 |
| chrII  | 3988703  | 3989688  | ReverseStr  | R.RWAETK   | 0.999945 | 2 | TRUE  | 2 |
| chrII  | 9242244  | 9249063  | GeneBound   | R.VFSCYKK  | 0.999982 | 2 | FALSE | 2 |
| chrII  | 411222   | 416618   | GeneBound   | R.FKWIGAS  | 0.999994 | 2 | FALSE | 2 |
| chrI   | 557434   | 561674   | GeneBound   | R.RDLGNVF  | 0.999975 | 2 | FALSE | 2 |
| chrX   | 17460698 | 17464892 | ReverseStr  | K.LIGTDPE  | 1        | 3 | FALSE | 3 |
| chrI   | 7871579  | 7875555  | NovelExon   | K.LSSYLAIH | 0.999675 | 1 | TRUE  | 1 |
| chrIV  | 14616575 | 14623936 | Translated  | K.HFEIYTES | 0.999959 | 2 | TRUE  | 2 |
| chrIV  | 8261131  | 8266448  | NovelSplice | _.DMDYAF   | 0.999932 | 1 | TRUE  | 1 |
| chrIII | 5413184  | 5413954  | ReverseStr  | R.IEVEGTG  | 0.999983 | 2 | FALSE | 2 |

|        |          |          |            |            |          |   |       |   |
|--------|----------|----------|------------|------------|----------|---|-------|---|
| chrIV  | 5651074  | 5660514  | FrameShift | K.ISSVPNIQ | 0.996939 | 1 | TRUE  | 1 |
| chrII  | 3119334  | 3123187  | FrameShift | K.VVKSSGT  | 0.995964 | 1 | TRUE  | 1 |
| chrV   | 7193745  | 7196119  | ReverseStr | L.EDESAAV  | 1        | 5 | TRUE  | 3 |
| chrX   | 15842289 | 15847520 | ReverseStr | K.SFMTYVI  | 0.99996  | 2 | TRUE  | 2 |
| chrIII | 7508110  | 7515214  | FrameShift | K.LLPVNQP  | 0.996512 | 1 | TRUE  | 1 |
| chrIII | 6974288  | 6977970  | FrameShift | R.EEVCYQM  | 0.998414 | 1 | TRUE  | 1 |
| chrIV  | 6552481  | 6555879  | ReverseStr | R.MRRLFP   | 0.999983 | 2 | TRUE  | 2 |
| chrX   | 5101001  | 5106142  | FrameShift | _.RTPSASSI | 0.999961 | 3 | TRUE  | 1 |
| chrIII | 4623020  | 4626141  | ReverseStr | N.LPTSKPG  | 0.999968 | 2 | TRUE  | 2 |
| chrI   | 506480   | 509059   | FrameShift | K.MIKTSFS/ | 0.998139 | 1 | TRUE  | 1 |
| chrIV  | 10642699 | 10652280 | ReverseStr | K.FSEGPNV  | 0.999999 | 2 | TRUE  | 2 |
| chrIII | 8001392  | 8001443  | NovelGene  | R.KLCFLVDI | 0.999983 | 2 | FALSE | 2 |
| chrIV  | 10204206 | 10206051 | ExonBound  | R.IYMFEGG  | 0.998224 | 1 | TRUE  | 1 |
| chrX   | 10147433 | 10152726 | ReverseStr | R.NYFRYISM | 0.999975 | 2 | FALSE | 2 |
| chrIII | 12315378 | 12315756 | GeneBound  | _.SCRLIFVM | 0.999988 | 2 | FALSE | 2 |
| chrIII | 3336     | 11940    | FrameShift | R.GEWSYKI  | 0.994178 | 1 | TRUE  | 1 |
| chrI   | 9289736  | 9293999  | ReverseStr | K.KKTPNEK  | 0.999983 | 2 | TRUE  | 2 |
| chrV   | 12406210 | 12406998 | ExonBound  | _.FVVDGSS  | 0.996482 | 1 | TRUE  | 1 |
| chrI   | 14062721 | 14068797 | ReverseStr | _.VLCKLEDI | 0.999995 | 2 | FALSE | 2 |
| chrIV  | 1231897  | 1232812  | ReverseStr | K.NEQKPEL  | 0.999992 | 2 | FALSE | 2 |
| chrIII | 5993181  | 6006318  | NovelExon  | R.RATTFAT  | 0.996303 | 1 | TRUE  | 1 |
| chrX   | 8418593  | 8422002  | ReverseStr | R.NSHKNTC  | 0.999965 | 2 | TRUE  | 2 |
| chrIV  | 959452   | 984392   | ReverseStr | K.LSNFREIS | 0.999975 | 2 | TRUE  | 2 |
| chrIII | 1758712  | 1759774  | NovelExon  | R.RSTLVPVI | 0.996374 | 1 | TRUE  | 1 |
| chrV   | 7231172  | 7232731  | FrameShift | R.WCYLESS  | 0.996656 | 1 | TRUE  | 1 |
| chrII  | 6792188  | 6799222  | FrameShift | K.NGRNFSV  | 0.997238 | 1 | TRUE  | 1 |
| chrV   | 13098895 | 13110322 | ReverseStr | R.SNRILMT  | 0.999976 | 2 | TRUE  | 2 |
| chrI   | 9973371  | 9976305  | NovelExon  | K.QLKENIF  | 0.994406 | 1 | TRUE  | 1 |
| chrII  | 9358472  | 9369040  | NovelExon  | K.HIDNKSE  | 0.999831 | 1 | TRUE  | 1 |
| chrI   | 4229889  | 4236040  | FrameShift | R.MSCASL   | 0.994406 | 1 | TRUE  | 1 |
| chrII  | 14450447 | 14451411 | NovelGene  | K.ILKIKMQ  | 0.999994 | 2 | FALSE | 2 |
| chrX   | 11109384 | 11115775 | ExonBound  | R.NKFNLF   | 0.994147 | 1 | TRUE  | 1 |
| chrIII | 4333369  | 4340455  | ExonBound  | K.SCRMDS   | 0.994162 | 1 | TRUE  | 1 |
| chrII  | 9922189  | 9930771  | NovelExon  | K.ILSKILDF | 0.997221 | 1 | TRUE  | 1 |
| chrIII | 6508079  | 6509449  | NovelExon  | _.SEINWSH  | 0.996639 | 1 | TRUE  | 1 |
| chrIII | 13256779 | 13262795 | NovelExon  | R.QFDTIAD  | 0.99758  | 1 | TRUE  | 1 |
| chrX   | 9733237  | 9737692  | ReverseStr | K.NKSKNGC  | 0.999918 | 2 | TRUE  | 2 |
| chrII  | 1425739  | 1437506  | NovelExon  | K.SKCFLEF  | 0.994645 | 1 | TRUE  | 1 |
| chrIV  | 2390820  | 2396275  | ReverseStr | K.ECRLLGTI | 0.999996 | 3 | TRUE  | 2 |
| chrX   | 5333045  | 5335438  | GeneBound  | R.ISNIEGDT | 0.999987 | 3 | FALSE | 2 |
| chrV   | 19056936 | 19057013 | NovelGene  | K.NYSTKFKI | 0.999985 | 2 | FALSE | 2 |
| chrI   | 7813756  | 7815037  | ReverseStr | K.LMEFSEN  | 0.999956 | 2 | TRUE  | 2 |
| chrX   | 10515362 | 10518589 | ReverseStr | K.HECIFHH  | 0.99993  | 2 | FALSE | 2 |
| chrX   | 11271120 | 11275418 | Translated | R.TVNYEVII | 0.999999 | 2 | TRUE  | 2 |
| chrIV  | 7304863  | 7308339  | FrameShift | M.KKINNHI  | 0.995134 | 1 | TRUE  | 1 |
| chrII  | 14276575 | 14283901 | FrameShift | _.FQIFSVM  | 0.997947 | 1 | TRUE  | 1 |
| chrIII | 10257090 | 10258645 | NovelExon  | K.ILGHHSF  | 0.999787 | 1 | TRUE  | 1 |

|        |          |          |            |            |          |   |       |   |
|--------|----------|----------|------------|------------|----------|---|-------|---|
| chrV   | 5503017  | 5504840  | FrameShift | R.NLTSNLLI | 0.998869 | 1 | TRUE  | 1 |
| chrII  | 11739421 | 11743335 | GeneBounc  | R.FQCPIER\ | 0.999998 | 2 | FALSE | 2 |
| chrIII | 13464728 | 13471247 | GeneBounc  | K.VLRHQKF  | 1        | 3 | FALSE | 3 |
| chrII  | 5606525  | 5607840  | GeneBounc  | K.KNYAPIRI | 0.999917 | 2 | FALSE | 2 |
| chrX   | 3567384  | 3572536  | ReverseStr | K.VSNVLTW  | 1        | 9 | TRUE  | 7 |
| chrX   | 7823603  | 7825047  | GeneBounc  | K.SGDAGIV  | 0.999994 | 3 | FALSE | 2 |
| chrI   | 189058   | 202489   | FrameShift | R.EKAAGKA  | 0.996401 | 1 | TRUE  | 1 |
| chrIV  | 16483178 | 16488988 | ReverseStr | K.KVELALW  | 1        | 6 | TRUE  | 2 |
| chrX   | 3380517  | 3382882  | FrameShift | K.LYTGQMI  | 0.994318 | 1 | TRUE  | 1 |
| chrIII | 491545   | 502148   | NovelExon  | K.TLKKRDK  | 0.9969   | 1 | TRUE  | 1 |
| chrX   | 14462787 | 14464330 | ExonBounc  | K.NWSLGP   | 0.998173 | 1 | TRUE  | 1 |
| chrX   | 13113867 | 13116278 | FrameShift | K.TCITTIVT | 0.99853  | 1 | TRUE  | 1 |
| chrI   | 14171852 | 14172774 | ReverseStr | K.LSSTSSEL | 0.999988 | 2 | FALSE | 2 |
| chrV   | 3958224  | 3961343  | GeneBounc  | R.HVPSESS  | 0.999991 | 2 | FALSE | 2 |
| chrV   | 6758176  | 6760392  | ReverseStr | K.HREGNIS  | 1        | 4 | TRUE  | 3 |
| chrIII | 8453190  | 8456223  | NovelGene  | _.GSAQLFL  | 0.999976 | 2 | FALSE | 2 |
| chrIII | 13107506 | 13118800 | GeneBounc  | K.YAIKDDN  | 0.999938 | 2 | FALSE | 2 |
| chrIII | 10141380 | 10143231 | NovelExon  | K.QTIITEYK | 0.994311 | 1 | TRUE  | 1 |
| chrIV  | 8666239  | 8666825  | GeneBounc  | R.ATDDWII  | 0.999992 | 2 | FALSE | 2 |
| chrIII | 560137   | 572134   | NovelExon  | I.EAENGTE  | 0.999671 | 1 | TRUE  | 1 |
| chrI   | 10030162 | 10046749 | NovelExon  | R.QRGEDSI  | 0.998497 | 1 | TRUE  | 1 |
| chrI   | 3523373  | 3529959  | ReverseStr | R.FSPHSSSF | 0.999963 | 2 | TRUE  | 2 |
| chrII  | 5116024  | 5118267  | ExonBounc  | R.FENNDIA  | 0.997227 | 1 | TRUE  | 1 |
| chrIV  | 13370946 | 13371589 | GeneBounc  | R.LSECKFTA | 1        | 3 | FALSE | 2 |
| chrI   | 7480131  | 7483388  | GeneBounc  | R.MSRSHF\  | 0.999943 | 2 | FALSE | 2 |
| chrX   | 12274974 | 12275609 | FrameShift | R.VFRQTAM  | 0.995385 | 1 | TRUE  | 1 |
| chrII  | 1127983  | 1132354  | ReverseStr | R.KVQESSP  | 1        | 3 | TRUE  | 3 |
| chrX   | 14602997 | 14608590 | FrameShift | K.KIQTM    | 0.998212 | 1 | TRUE  | 1 |
| chrX   | 17401393 | 17402534 | GeneBounc  | _.SISRLSKP | 0.999941 | 2 | FALSE | 2 |
| chrI   | 1416593  | 1424610  | NovelExon  | R.MFTEEN\  | 0.996991 | 1 | TRUE  | 1 |
| chrV   | 6882021  | 6890939  | FrameShift | R.KVRQQG   | 0.997074 | 1 | TRUE  | 1 |
| chrIV  | 4387710  | 4388871  | GeneBounc  | R.PQSSIGLI | 1        | 3 | FALSE | 3 |
| chrII  | 14754593 | 14778061 | NovelExon  | K.FPENRHI  | 0.997965 | 1 | TRUE  | 1 |
| chrV   | 2233481  | 2235137  | FrameShift | R.NQVINSI  | 0.99881  | 1 | TRUE  | 1 |
| chrIII | 13342583 | 13343236 | FrameShift | R.INSEGTP  | 0.995667 | 1 | TRUE  | 1 |
| chrIII | 7095491  | 7097017  | ExonBounc  | K.KFTQIQN  | 0.995968 | 1 | TRUE  | 1 |
| chrV   | 4113320  | 4114712  | FrameShift | R.CSRITVSS | 0.994795 | 1 | TRUE  | 1 |
| chrX   | 8285631  | 8286726  | GeneBounc  | K.FTPWNTF  | 0.999983 | 2 | FALSE | 2 |
| chrIV  | 16424618 | 16429865 | NovelExon  | R.KMGGLL   | 0.994591 | 1 | TRUE  | 1 |
| chrIV  | 92016    | 110361   | NovelExon  | K.NNGTPVI  | 0.997341 | 1 | TRUE  | 1 |
| chrII  | 11679033 | 11680220 | GeneBounc  | R.WDQNTF   | 1        | 3 | FALSE | 3 |
| chrV   | 16258422 | 16260666 | FrameShift | R.RQPAAW   | 0.996309 | 1 | TRUE  | 1 |
| chrII  | 13160345 | 13165663 | ReverseStr | K.LKYNNKN  | 0.999954 | 2 | FALSE | 2 |
| chrII  | 4938050  | 4938596  | GeneBounc  | R.PMNYNLI  | 0.99998  | 2 | FALSE | 2 |
| chrIV  | 8503480  | 8510498  | GeneBounc  | R.EVPLPISE | 0.999965 | 2 | FALSE | 2 |
| chrIV  | 1247386  | 1249025  | ReverseStr | R.RVACRRF  | 0.999967 | 2 | TRUE  | 2 |
| chrV   | 9336738  | 9338834  | GeneBounc  | R.WRFGTG   | 0.999998 | 4 | FALSE | 2 |

|        |          |          |                        |          |   |       |   |
|--------|----------|----------|------------------------|----------|---|-------|---|
| chrIV  | 12978993 | 12981916 | ReverseStr: K.TVLSGMK  | 0.999957 | 2 | FALSE | 2 |
| chrII  | 135466   | 139594   | ReverseStr: K.KFCKKCC  | 1        | 3 | FALSE | 3 |
| chrIII | 949316   | 950600   | FrameShift R.RSKFYEN   | 0.99744  | 1 | TRUE  | 1 |
| chrV   | 13553359 | 13556396 | ReverseStr: R.YWWSLC   | 0.999998 | 2 | TRUE  | 2 |
| chrII  | 3452645  | 3453605  | GeneBound R.LIFNKCF    | 0.999978 | 3 | FALSE | 2 |
| chrV   | 20580965 | 20590309 | NovelExon R.IPLKNCP    | 0.9977   | 1 | TRUE  | 1 |
| chrIII | 12434310 | 12435122 | NovelExon K.IILALFEH   | 0.99884  | 1 | TRUE  | 1 |
| chrX   | 9501561  | 9516378  | NovelExon Y.FRLQGSII   | 0.996523 | 1 | TRUE  | 1 |
| chrIV  | 15946758 | 15947407 | FrameShift D.FQIISMY   | 0.995669 | 1 | TRUE  | 1 |
| chrIII | 7189079  | 7189576  | ReverseStr: F.HHKIWN   | 0.999985 | 3 | FALSE | 2 |
| chrII  | 9886479  | 9891029  | ReverseStr: S.RTEDPNL  | 1        | 2 | TRUE  | 2 |
| chrIII | 10124091 | 10132314 | FrameShift _VAGIPLH    | 0.999117 | 1 | TRUE  | 1 |
| chrX   | 1479537  | 1484082  | FrameShift R.AQGDNF    | 0.995008 | 1 | TRUE  | 1 |
| chrIV  | 8631321  | 8643991  | NovelExon K.NKMDKG     | 0.997577 | 1 | TRUE  | 1 |
| chrIII | 8403643  | 8405490  | ReverseStr: K.INKKVAK  | 0.999956 | 2 | TRUE  | 2 |
| chrIV  | 9297943  | 9299228  | ReverseStr: N.CKVKTVF  | 0.999944 | 2 | FALSE | 2 |
| chrIV  | 119274   | 121711   | FrameShift R.SSASLNR   | 0.994981 | 1 | TRUE  | 1 |
| chrV   | 18087105 | 18098091 | NovelExon Q.FSVKINN    | 0.995832 | 1 | TRUE  | 1 |
| chrV   | 13161471 | 13176077 | GeneBound Q.KNQSLR     | 0.999932 | 2 | FALSE | 2 |
| chrX   | 9440339  | 9441505  | ReverseStr: K.YFLYAEIF | 0.999998 | 2 | TRUE  | 2 |
| chrII  | 7561705  | 7563046  | ReverseStr: R.LVFCKRSI | 1        | 3 | TRUE  | 3 |
| chrIV  | 2688959  | 2703975  | NovelExon R.RKMGKF     | 0.995418 | 1 | TRUE  | 1 |
| chrV   | 12575171 | 12576876 | ReverseStr: K.ALSRRCYI | 1        | 5 | TRUE  | 4 |
| chrX   | 13706858 | 13707885 | GeneBound K.CRPQAGI    | 0.999956 | 2 | FALSE | 2 |
| chrV   | 246608   | 251747   | GeneBound R.ELSLNTFL   | 0.999989 | 3 | FALSE | 2 |
| chrII  | 14060664 | 14062548 | FrameShift K.TIRMMRI   | 0.996939 | 1 | TRUE  | 1 |
| chrX   | 2243226  | 2247000  | ReverseStr: R.RYGRCSG  | 1        | 7 | FALSE | 3 |
| chrI   | 502958   | 506253   | ReverseStr: K.FFFAIFGC | 0.999978 | 2 | TRUE  | 2 |
| chrX   | 1311603  | 1316631  | ReverseStr: R.SDRKALN  | 0.999979 | 2 | FALSE | 2 |
| chrII  | 8997765  | 8999663  | GeneBound V.ENARTLF    | 0.99997  | 2 | FALSE | 2 |
| chrIII | 5009824  | 5017614  | ExonBound K.GTRRSAN    | 0.996426 | 1 | TRUE  | 1 |
| chrIV  | 3748198  | 3751096  | ReverseStr: K.YLDAKCK  | 0.999985 | 2 | TRUE  | 2 |
| chrIV  | 1310166  | 1328239  | NovelExon K.NLSENVN    | 0.998144 | 1 | TRUE  | 1 |
| chrV   | 15793834 | 15795175 | FrameShift K.TFFFRSSS  | 0.997361 | 1 | TRUE  | 1 |
| chrX   | 15726061 | 15731957 | FrameShift N.LEGKFSV   | 0.995947 | 1 | TRUE  | 1 |
| chrX   | 5985157  | 5992068  | ReverseStr: L.ALALNNS  | 0.99999  | 2 | FALSE | 2 |
| chrII  | 15135417 | 15145197 | NovelExon I.VFQNFVP    | 0.997014 | 1 | TRUE  | 1 |
| chrIII | 2676401  | 2681100  | NovelExon R.YLRETLQI   | 0.997875 | 1 | TRUE  | 1 |
| chrII  | 11365328 | 11370248 | FrameShift K.FYNSHLIS  | 0.998239 | 1 | TRUE  | 1 |
| chrIV  | 7517435  | 7520356  | NovelExon F.RLSESELE   | 0.995691 | 1 | TRUE  | 1 |
| chrII  | 168532   | 169103   | ReverseStr: K.LMQAWI   | 0.99994  | 2 | FALSE | 2 |
| chrIV  | 749867   | 753316   | NovelExon R.DVANCCI    | 0.997875 | 1 | TRUE  | 1 |
| chrI   | 9690089  | 9690548  | ReverseStr: K.QKETKIEL | 0.999944 | 2 | FALSE | 2 |
| chrV   | 15398922 | 15399774 | FrameShift R.KLSYGIIQ  | 0.997115 | 1 | TRUE  | 1 |
| chrV   | 1846200  | 1848014  | ReverseStr: K.QKKKQKF  | 1        | 3 | FALSE | 3 |
| chrII  | 10009710 | 10016001 | FrameShift R.MGQRRR    | 0.996634 | 1 | TRUE  | 1 |
| chrIV  | 7696923  | 7698357  | ReverseStr: K.RMRGAD   | 1        | 4 | TRUE  | 4 |

|        |          |          |                         |          |     |       |    |
|--------|----------|----------|-------------------------|----------|-----|-------|----|
| chrIV  | 12622460 | 12630999 | ReverseStr:_.FSEAPRK.   | 0.999995 | 2   | FALSE | 2  |
| chrX   | 1479537  | 1484082  | FrameShift K.GFGVGYC    | 0.999762 | 1   | TRUE  | 1  |
| chrV   | 12552192 | 12553210 | ReverseStr: R.RHVPQLT   | 0.999968 | 2   | TRUE  | 2  |
| chrII  | 11679033 | 11680971 | ReverseStr: D.YFKVISAC  | 1        | 3   | TRUE  | 3  |
| chrII  | 9042715  | 9053603  | ReverseStr: S.NEDAFLS   | 0.999949 | 2   | TRUE  | 2  |
| chrII  | 5867232  | 5873592  | ReverseStr: K.LESKFNKI  | 0.999977 | 2   | FALSE | 2  |
| chrII  | 1864737  | 1864889  | ReverseStr: K.QAFSTVG   | 1        | 6   | FALSE | 5  |
| chrIV  | 7580586  | 7583710  | GeneBounc R.NLEYFISM    | 0.99995  | 2   | FALSE | 2  |
| chrIII | 9145970  | 9147338  | FrameShift R.QCLLMEC    | 0.997476 | 1   | TRUE  | 1  |
| chrX   | 3917281  | 3919815  | ExonBounc E.VFEVQSG     | 0.999868 | 1   | TRUE  | 1  |
| chrV   | 10806107 | 10807892 | ReverseStr: K.EDDETEE   | 1        | 3   | TRUE  | 3  |
| chrV   | 2688609  | 2694368  | ReverseStr: V.CRKFISIC  | 0.999964 | 2   | TRUE  | 2  |
| chrII  | 7535081  | 7536941  | GeneBounc K.QDFKAC      | 1        | 3   | FALSE | 3  |
| chrII  | 11762103 | 11765599 | ReverseStr: K.MSKNVFI   | 1        | 5   | TRUE  | 5  |
| chrIII | 5228378  | 5230505  | FrameShift G.YLPAVDP    | 0.998257 | 1   | TRUE  | 1  |
| chrV   | 9205351  | 9207444  | ReverseStr: R.IPTTSSLIS | 1        | 2   | TRUE  | 2  |
| chrIV  | 4103013  | 4105350  | GeneBounc Y.KKNEKRE     | 0.999995 | 2   | FALSE | 2  |
| chrIV  | 17096491 | 17098015 | GeneBounc K.ILNFASA/    | 0.999996 | 2   | FALSE | 2  |
| chrII  | 15207367 | 15226652 | FrameShift R.RLVNEKA    | 0.999026 | 1   | TRUE  | 1  |
| chrII  | 9076309  | 9078798  | NovelGene _.PYLPIIEVI   | 1        | 2   | FALSE | 2  |
| chrIII | 2718150  | 2725084  | NovelExon K.KKTLIQAI    | 0.995731 | 1   | TRUE  | 1  |
| chrIII | 2249922  | 2251438  | ReverseStr: R.QLGFPIAI  | 0.999948 | 2   | FALSE | 2  |
| chrIII | 6972155  | 6973667  | GeneBounc _.SSLVSLLG    | 1        | 103 | FALSE | 23 |
| chrIV  | 13616927 | 13617230 | NovelGene K.SSSSNGS'    | 0.999954 | 2   | FALSE | 2  |
| chrV   | 10356259 | 10357880 | ReverseStr: R.GIAGALN   | 1        | 3   | TRUE  | 3  |
| chrII  | 7366548  | 7368803  | ReverseStr: R.LIAPMKS   | 0.99997  | 3   | TRUE  | 2  |
| chrII  | 1749990  | 1751603  | ReverseStr: K.HPCSRM'   | 0.999987 | 2   | TRUE  | 2  |
| chrIII | 1902184  | 1905631  | ReverseStr: K.FHGGALK   | 0.99996  | 3   | FALSE | 2  |
| chrIII | 13254567 | 13256284 | FrameShift R.NYSPKAS    | 0.996515 | 1   | TRUE  | 1  |
| chrIII | 10520704 | 10530641 | TranslatedI R.SQVDDVI   | 0.999963 | 2   | TRUE  | 2  |
| chrI   | 4942070  | 4949335  | ReverseStr: R.VAPNPGI   | 0.999981 | 3   | FALSE | 2  |
| chrI   | 7614172  | 7634139  | FrameShift R.VVTMLM     | 0.998833 | 1   | TRUE  | 1  |
| chrX   | 13811988 | 13812052 | NovelGene Q.RAIEEEN     | 0.99998  | 2   | FALSE | 2  |
| chrIV  | 13300804 | 13303667 | ReverseStr:_.SVTSASN.   | 0.999948 | 2   | TRUE  | 2  |
| chrIII | 13153716 | 13160189 | ExonBounc R.KMSRKGI     | 0.995108 | 1   | TRUE  | 1  |
| chrI   | 2673051  | 2682799  | NovelExon K.FIDFSGISI   | 0.997937 | 1   | TRUE  | 1  |
| chrIV  | 16167751 | 16170794 | ReverseStr: K.GKTRDQ]   | 0.999977 | 2   | TRUE  | 2  |
| chrII  | 5498834  | 5501392  | ReverseStr:_.CFNFIIFS/  | 0.999933 | 2   | TRUE  | 2  |
| chrI   | 8205455  | 8208734  | FrameShift K.FECTTGG    | 0.994457 | 1   | TRUE  | 1  |
| chrII  | 12373458 | 12379447 | ReverseStr:_.YGYVCSQ    | 1        | 3   | TRUE  | 3  |
| chrIII | 12715622 | 12743828 | NovelExon K.KNFDFSA     | 0.997577 | 1   | TRUE  | 1  |
| chrX   | 1321348  | 1327980  | GeneBounc F.KNISKGAI    | 0.99995  | 2   | FALSE | 2  |
| chrI   | 6836468  | 6838141  | FrameShift _.KALRASPI   | 0.998254 | 1   | TRUE  | 1  |
| chrIV  | 1457074  | 1459524  | ReverseStr: V.SRDQTLCD  | 0.999918 | 2   | TRUE  | 2  |
| chrIII | 13755841 | 13759350 | FrameShift R.GTAPSDF    | 0.994898 | 1   | TRUE  | 1  |
| chrX   | 14464739 | 14467545 | GeneBounc K.NWSLGP'     | 0.999984 | 2   | FALSE | 2  |
| chrI   | 13841883 | 13842727 | ReverseStr:_.SLCSMSA    | 1        | 5   | TRUE  | 5  |



|        |          |          |                        |          |   |       |   |
|--------|----------|----------|------------------------|----------|---|-------|---|
| chrX   | 1391792  | 1393986  | ReverseStr: R.YTVYIAK. | 0.999996 | 2 | TRUE  | 2 |
| chrX   | 7586062  | 7595441  | FrameShift E.FGRYGMI   | 0.997054 | 1 | TRUE  | 1 |
| chrIV  | 121791   | 126225   | NovelExon R.KTLKNIFS   | 0.995588 | 1 | TRUE  | 1 |
| chrX   | 4353593  | 4354786  | FrameShift R.AGTTRTS   | 0.99479  | 1 | TRUE  | 1 |
| chrII  | 12890561 | 12891955 | FrameShift K.KTCFVSD   | 0.998094 | 1 | TRUE  | 1 |
| chrII  | 14155205 | 14155611 | FrameShift _SELLNCNI   | 0.9981   | 1 | TRUE  | 1 |
| chrIII | 4596109  | 4612303  | NovelExon R.RRVGMY     | 1        | 1 | TRUE  | 1 |
| chrI   | 11924776 | 11929498 | FrameShift R.KSGGSSL   | 1        | 1 | TRUE  | 1 |
| chrIII | 11612507 | 11615694 | GeneBound K.NINNATF    | 0.999978 | 2 | FALSE | 2 |
| chrIV  | 2891555  | 2892495  | FrameShift R.ALRRNR    | 0.998289 | 1 | TRUE  | 1 |
| chrV   | 3955751  | 3957700  | FrameShift R.NGLYQR    | 0.998507 | 1 | TRUE  | 1 |
| chrIV  | 7818239  | 7821149  | NovelExon _ISYFKFRN    | 0.997533 | 1 | TRUE  | 1 |
| chrV   | 17968565 | 17980055 | ReverseStr: R.EKVKINA  | 0.999975 | 2 | TRUE  | 2 |
| chrI   | 12444577 | 12446492 | FrameShift R.NPGDPE    | 0.997794 | 1 | TRUE  | 1 |
| chrII  | 14365659 | 14373374 | FrameShift R.VGAENG    | 0.999838 | 1 | TRUE  | 1 |
| chrIV  | 3794762  | 3796262  | ReverseStr: R.SGEEDPT  | 0.999963 | 2 | TRUE  | 2 |
| chrI   | 10330870 | 10331738 | FrameShift R.RKGRLEIE  | 0.996607 | 1 | TRUE  | 1 |
| chrII  | 14417812 | 14424815 | ReverseStr: R.ISRITGHR | 0.999949 | 2 | TRUE  | 2 |
| chrII  | 5638363  | 5639033  | GeneBound K.MPLNFK     | 0.999997 | 2 | FALSE | 2 |
| chrII  | 340539   | 342473   | ReverseStr: R.RWPRPL   | 1        | 3 | TRUE  | 3 |
| chrII  | 10174589 | 10180128 | ReverseStr: R.RSRTFQV  | 0.999984 | 2 | TRUE  | 2 |
| chrV   | 14688622 | 14688905 | GeneBound _GAQDQG      | 1        | 5 | FALSE | 5 |
| chrIII | 6436556  | 6439906  | FrameShift R.KDEPVVV   | 0.994516 | 1 | TRUE  | 1 |
| chrX   | 2909546  | 2918027  | FrameShift K.KGQVQLI   | 0.996259 | 1 | TRUE  | 1 |
| chrV   | 5647548  | 5651027  | NovelExon R.RGMNLG     | 0.994531 | 1 | TRUE  | 1 |
| chrIV  | 2887050  | 2891441  | ReverseStr: R.ALRRNR   | 1        | 4 | TRUE  | 3 |
| chrIV  | 874601   | 881909   | FrameShift R.LEGRRRR   | 0.99575  | 1 | TRUE  | 1 |
| chrI   | 13548063 | 13559350 | ExonBound P.EIDGEIPA   | 1        | 1 | TRUE  | 1 |
| chrIV  | 6978764  | 6986924  | ReverseStr: K.NEGKGLK  | 0.999931 | 2 | TRUE  | 2 |
| chrI   | 9805167  | 9806963  | NovelGene R.KGFIEREF   | 0.99997  | 2 | FALSE | 2 |
| chrII  | 2948932  | 2952732  | FrameShift N.FWRCCIV   | 0.995288 | 1 | TRUE  | 1 |
| chrV   | 14953098 | 14954716 | ReverseStr: R.QKLENIS  | 1        | 2 | FALSE | 2 |
| chrI   | 12526179 | 12527543 | NovelExon R.TSGRQDI    | 0.994115 | 1 | TRUE  | 1 |
| chrV   | 1743771  | 1747927  | NovelExon _KIKFQNIY    | 0.995976 | 1 | TRUE  | 1 |
| chrIII | 11334741 | 11342145 | ReverseStr: K.KKKSGSA  | 0.999969 | 2 | FALSE | 2 |
| chrI   | 13254130 | 13257720 | ReverseStr: K.LLYTWRC  | 0.999995 | 2 | TRUE  | 2 |
| chrII  | 15120225 | 15123270 | ExonBound R.TTGVVLD    | 0.999401 | 1 | TRUE  | 1 |
| chrII  | 11465875 | 11467577 | ReverseStr: K.EPESALR. | 1        | 4 | FALSE | 4 |
| chrII  | 8994574  | 8996209  | ExonBound V.ENARTLF    | 0.995767 | 1 | TRUE  | 1 |
| chrIII | 973296   | 980440   | FrameShift R.HMSKWT    | 0.997629 | 1 | TRUE  | 1 |
| chrIII | 1435575  | 1437372  | NovelGene R.KNNNLP     | 0.999996 | 2 | FALSE | 2 |
| chrV   | 12873800 | 12875413 | NovelGene _KPKGGTE     | 1        | 3 | FALSE | 3 |
| chrIII | 4407416  | 4408409  | GeneBound R.SSQSLEE    | 1        | 2 | FALSE | 2 |
| chrII  | 14973377 | 14976924 | NovelExon K.KLKKSGKI   | 0.99737  | 1 | TRUE  | 1 |
| chrIV  | 194745   | 202585   | ExonBound R.INFPYLV    | 0.994318 | 1 | TRUE  | 1 |
| chrI   | 1157572  | 1162903  | GeneBound K.NNPYMS     | 0.999996 | 2 | FALSE | 2 |
| chrI   | 8975377  | 8986515  | ReverseStr: _DSYGQSE   | 0.999964 | 2 | TRUE  | 2 |

|        |          |          |                         |          |   |       |   |
|--------|----------|----------|-------------------------|----------|---|-------|---|
| chrI   | 12459489 | 12460893 | ReverseStr: K.SQVLPKP   | 0.999994 | 2 | FALSE | 2 |
| chrIV  | 12780942 | 12787489 | GeneBound C.FKADNAK     | 1        | 3 | FALSE | 3 |
| chrIII | 11202911 | 11203220 | NovelGene R.EAESGLLI    | 0.999943 | 2 | FALSE | 2 |
| chrIV  | 12408967 | 12410464 | ReverseStr: K.FNRIYVID  | 0.999991 | 2 | FALSE | 2 |
| chrIII | 5373660  | 5374338  | NovelGene R.LLTEWRR     | 0.999968 | 2 | FALSE | 2 |
| chrX   | 3684211  | 3689194  | ExonBound _SAYNFEIM     | 0.999156 | 1 | TRUE  | 1 |
| chrV   | 15316480 | 15318408 | FrameShift _LKITPSSG    | 0.995479 | 1 | TRUE  | 1 |
| chrX   | 6967327  | 6983091  | NovelExon _KVKNTCL      | 0.997297 | 1 | TRUE  | 1 |
| chrIII | 1950651  | 1951418  | FrameShift R.MNVLAD     | 0.995334 | 1 | TRUE  | 1 |
| chrV   | 4887159  | 4889602  | ReverseStr: _TAMKMA     | 1        | 4 | FALSE | 2 |
| chrV   | 19600900 | 19606090 | NovelExon _TRLKFGSI     | 0.997896 | 1 | TRUE  | 1 |
| chrX   | 12363645 | 12364836 | GeneBound R.STPCNAN     | 0.999955 | 2 | FALSE | 2 |
| chrIV  | 11482647 | 11498145 | NovelExon K.NVSVFYLI    | 0.99583  | 1 | TRUE  | 1 |
| chrX   | 7427379  | 7427448  | NovelGene _LASPPKM      | 0.999992 | 2 | FALSE | 2 |
| chrV   | 15088410 | 15088682 | GeneBound R.TRVRSKLI    | 0.999983 | 2 | FALSE | 2 |
| chrI   | 12292260 | 12293927 | FrameShift H.FRTVPTLI   | 0.995376 | 1 | TRUE  | 1 |
| chrV   | 15116251 | 15116578 | ReverseStr: K.IVFYKFLY  | 0.999964 | 2 | TRUE  | 2 |
| chrV   | 1276416  | 1285700  | ReverseStr: K.KWRRRK    | 0.999962 | 2 | FALSE | 2 |
| chrX   | 1004334  | 1009523  | ReverseStr: K.FLAAGDL   | 0.999992 | 3 | TRUE  | 2 |
| chrV   | 19705175 | 19706349 | ReverseStr: C.RFFSNNP   | 0.999969 | 2 | FALSE | 2 |
| chrIII | 13257321 | 13262782 | Translated K.GERRQA     | 0.999991 | 2 | TRUE  | 2 |
| chrIV  | 15014051 | 15025485 | Translated R.ILSVPRLF   | 0.999936 | 2 | TRUE  | 2 |
| chrI   | 4422033  | 4426177  | FrameShift K.DRWLLD     | 0.997457 | 1 | TRUE  | 1 |
| chrV   | 17684123 | 17684942 | ReverseStr: R.RMKIFEN   | 0.999999 | 2 | FALSE | 2 |
| chrI   | 14381349 | 14384725 | FrameShift R.EWNVVN     | 0.998196 | 1 | TRUE  | 1 |
| chrI   | 12618380 | 12620100 | NovelGene K.EKKCNLIS    | 0.999931 | 2 | FALSE | 2 |
| chrV   | 5226990  | 5229671  | ReverseStr: K.CIFFRNT   | 1        | 5 | TRUE  | 4 |
| chrII  | 13272564 | 13304159 | NovelExon K.MSKGGG      | 0.999994 | 2 | TRUE  | 2 |
| chrIII | 5857165  | 5859141  | GeneBound R.ALFMVG      | 1        | 3 | FALSE | 3 |
| chrI   | 14205705 | 14208569 | FrameShift K.NSEIMVII   | 0.995438 | 1 | TRUE  | 1 |
| chrI   | 9234164  | 9245919  | NovelExon K.TMKNQR      | 0.994935 | 1 | TRUE  | 1 |
| chrII  | 7310305  | 7313746  | NovelExon R.MPVMAF      | 0.995404 | 1 | TRUE  | 1 |
| chrIV  | 9772500  | 9773454  | Translated K.KAGGVD     | 1        | 3 | TRUE  | 3 |
| chrX   | 15503336 | 15505305 | GeneBound R.GGRSSSR     | 0.999995 | 2 | FALSE | 2 |
| chrV   | 4991490  | 4995049  | ReverseStr: K.KNTGTTL   | 0.999978 | 2 | TRUE  | 2 |
| chrIII | 2819274  | 2824659  | NovelExon K.SEHWNC      | 0.995318 | 1 | TRUE  | 1 |
| chrII  | 11464860 | 11468589 | Translated L.MKISLLRF   | 0.999938 | 2 | TRUE  | 2 |
| chrIV  | 8843608  | 8843757  | ReverseStr: R.QEGAGS    | 0.999999 | 4 | TRUE  | 2 |
| chrX   | 669682   | 670799   | ReverseStr: K.KTACRPK   | 0.99999  | 2 | FALSE | 2 |
| chrIV  | 749867   | 753316   | ReverseStr: _SKMFDDI    | 0.99999  | 2 | FALSE | 2 |
| chrII  | 11739421 | 11743335 | NovelExon R.LLSFHACI    | 0.996822 | 1 | TRUE  | 1 |
| chrIII | 1945111  | 1950257  | ReverseStr: R.MNVLAD    | 1        | 8 | FALSE | 5 |
| chrI   | 13451508 | 13452830 | ReverseStr: K.IDLQTLKI  | 0.999981 | 2 | FALSE | 2 |
| chrII  | 6716921  | 6717802  | ReverseStr: K.LKIITNLEI | 0.999983 | 2 | TRUE  | 2 |
| chrII  | 1386895  | 1391574  | FrameShift K.KSTIFPDII  | 0.99505  | 1 | TRUE  | 1 |
| chrX   | 5875863  | 5881681  | ExonBound _KGSCCKPN     | 0.996989 | 1 | TRUE  | 1 |
| chrI   | 12878585 | 12902794 | ReverseStr: R.AWTKSSS   | 0.999961 | 2 | TRUE  | 2 |

|        |          |          |                       |          |    |       |   |
|--------|----------|----------|-----------------------|----------|----|-------|---|
| chrIII | 9080294  | 9081102  | ReverseStr:_.HKEYKTEI | 1        | 15 | TRUE  | 9 |
| chrV   | 4349760  | 4361538  | NovelExon_._ELCVFSP/  | 0.999703 | 1  | TRUE  | 1 |
| chrX   | 6674831  | 6679813  | FrameShift K.RMRSHN   | 0.997905 | 1  | TRUE  | 1 |
| chrX   | 13996238 | 13999282 | FrameShift R.SQMDILC  | 0.999319 | 1  | TRUE  | 1 |
| chrI   | 5919789  | 5935418  | NovelExon K.RSLISNLY  | 0.997076 | 1  | TRUE  | 1 |
| chrIV  | 7149349  | 7150678  | TranslatedI K.ERKEMTK | 0.999998 | 2  | TRUE  | 2 |
| chrII  | 8606798  | 8607691  | ExonBounc R.VDETLILC  | 1        | 1  | TRUE  | 1 |
| chrI   | 9710079  | 9710758  | ReverseStr: A.MQAML1  | 0.999987 | 2  | FALSE | 2 |
| chrII  | 7155590  | 7160897  | ReverseStr: R.VNWKNE  | 0.999984 | 2  | TRUE  | 2 |
| chrII  | 11475994 | 11476451 | ReverseStr:_.NFLNKVG  | 0.999951 | 2  | FALSE | 2 |
| chrI   | 13706040 | 13708418 | NovelGene R.KTGVLAL   | 1        | 3  | FALSE | 3 |
| chrV   | 951588   | 964801   | NovelExon K.YRKHFGE   | 0.999858 | 1  | TRUE  | 1 |
| chrII  | 7390448  | 7392209  | NovelGene R.GEEAEDC   | 0.999998 | 2  | FALSE | 2 |
| chrIV  | 165125   | 169968   | NovelExon R.RWWQG     | 0.994893 | 1  | TRUE  | 1 |
| chrX   | 12725370 | 12727581 | GeneBounc R.MSAEASF   | 0.999992 | 2  | FALSE | 2 |
| chrV   | 13840727 | 13842173 | GeneBounc R.NIDLGHV   | 0.999983 | 2  | FALSE | 2 |
| chrI   | 7781173  | 7782543  | ReverseStr: K.NQTGGKI | 0.999993 | 2  | FALSE | 2 |
| chrV   | 16160665 | 16162204 | ReverseStr:_.KNNFNSM  | 0.999998 | 2  | FALSE | 2 |
| chrIII | 347687   | 348597   | ReverseStr: R.PRRGDAL | 1        | 3  | TRUE  | 3 |
| chrIII | 1081394  | 1095063  | NovelExon K.NMEKSLM   | 0.996943 | 1  | TRUE  | 1 |
| chrV   | 3402628  | 3405158  | ReverseStr: K.GLTPMTI | 0.999998 | 2  | TRUE  | 2 |
| chrI   | 4830136  | 4833877  | ExonBounc K.QVILNFLI  | 0.998261 | 1  | TRUE  | 1 |
| chrI   | 13310885 | 13318693 | GeneBounc L.TVFNITID  | 0.999953 | 2  | FALSE | 2 |
| chrI   | 9149710  | 9153068  | GeneBounc_._RRSLKIAC  | 0.999991 | 2  | FALSE | 2 |
| chrI   | 2342218  | 2350470  | NovelExon R.RTANSAN   | 0.994381 | 1  | TRUE  | 1 |
| chrIV  | 14825647 | 14826428 | FrameShift_._RELTEEDI | 0.998794 | 3  | TRUE  | 1 |
| chrI   | 1049597  | 1050729  | ReverseStr: R.FVGNFVA | 0.999968 | 2  | FALSE | 2 |
| chrI   | 4508929  | 4511127  | FrameShift_._LQNIYKR  | 0.995358 | 1  | TRUE  | 1 |
| chrV   | 1482051  | 1483053  | GeneBounc K.NTVLKYT   | 1        | 5  | FALSE | 3 |
| chrIII | 5364473  | 5368008  | FrameShift R.MKTENH   | 0.995076 | 1  | TRUE  | 1 |
| chrX   | 17385905 | 17391488 | ReverseStr:_.KYIRGIM  | 1        | 3  | FALSE | 3 |
| chrI   | 7079910  | 7082019  | GeneBounc R.AGVIQGF   | 0.999984 | 2  | FALSE | 2 |
| chrIII | 2347581  | 2362048  | NovelExon R.EFFHLVA   | 0.996709 | 1  | TRUE  | 1 |
| chrIV  | 10014065 | 10016377 | ReverseStr:_.WAKLEDG  | 1        | 3  | FALSE | 3 |
| chrX   | 15161213 | 15166147 | ReverseStr: R.KTCADFT | 0.999987 | 2  | FALSE | 2 |
| chrI   | 1924302  | 1932262  | NovelExon K.MKKTGK    | 0.998621 | 1  | TRUE  | 1 |
| chrX   | 6809065  | 6817593  | ReverseStr:_.LRIPKGN  | 1        | 3  | TRUE  | 3 |
| chrIII | 4520333  | 4536957  | NovelExon K.ISSISKYET | 0.997115 | 1  | TRUE  | 1 |
| chrX   | 2711207  | 2748107  | ReverseStr: K.KYYFEQT | 0.999989 | 2  | TRUE  | 2 |
| chrII  | 8600300  | 8602421  | ReverseStr: K.ENILMLS | 1        | 5  | FALSE | 3 |
| chrII  | 8603807  | 8606693  | GeneBounc P.QAHFNAI   | 0.999994 | 4  | FALSE | 2 |
| chrI   | 2216102  | 2219444  | FrameShift_._EVSEGFV  | 0.995642 | 1  | TRUE  | 1 |
| chrX   | 4824973  | 4834851  | ExonBounc K.AFDNEVC   | 1        | 1  | TRUE  | 1 |
| chrI   | 4610146  | 4622973  | NovelExon K.RLSYEKK   | 0.996844 | 1  | TRUE  | 1 |
| chrV   | 16219589 | 16221896 | GeneBounc K.MIKWISS   | 0.999987 | 2  | FALSE | 2 |
| chrI   | 14476662 | 14486750 | NovelExon K.NRFFLEKI  | 0.995354 | 1  | TRUE  | 1 |
| chrX   | 9192387  | 9194325  | FrameShift R.KSSIGNG  | 0.994356 | 1  | TRUE  | 1 |

|        |          |          |                        |          |    |       |    |
|--------|----------|----------|------------------------|----------|----|-------|----|
| chrII  | 3802961  | 3803326  | ReverseStr: R.AITVIAEK | 0.999979 | 3  | FALSE | 2  |
| chrX   | 1983708  | 1984827  | GeneBound D.YLPFDIKF   | 0.999992 | 2  | FALSE | 2  |
| chrV   | 7076319  | 7081521  | ReverseStr: K.LFYTLTL  | 0.999963 | 2  | TRUE  | 2  |
| chrIV  | 1567896  | 1595823  | ReverseStr: K.FQYFFLLF | 0.999956 | 2  | TRUE  | 2  |
| chrV   | 14012318 | 14013629 | GeneBound Y.FSSKSLFN   | 0.999937 | 2  | FALSE | 2  |
| chrX   | 1321348  | 1327980  | FrameShift K.EKVQKGM   | 0.997038 | 1  | TRUE  | 1  |
| chrIV  | 9772490  | 9773454  | FrameShift K.KAGGVD    | 0.999987 | 2  | TRUE  | 2  |
| chrV   | 314846   | 3171109  | NovelGene K.AVQLEKR    | 1        | 2  | FALSE | 2  |
| chrV   | 10023535 | 10028135 | FrameShift K.SRYVSRIV  | 0.999421 | 1  | TRUE  | 1  |
| chrI   | 3439110  | 3449179  | NovelExon R.FFFKSTGI   | 0.994787 | 1  | TRUE  | 1  |
| chrX   | 7783136  | 7787884  | FrameShift K.LEMMKSI   | 0.996076 | 1  | TRUE  | 1  |
| chrI   | 12652608 | 12654636 | GeneBound K.IDFKKCS    | 0.999991 | 2  | FALSE | 2  |
| chrX   | 16103571 | 16124272 | GeneBound M.RSALGSF    | 1        | 5  | FALSE | 4  |
| chrX   | 3684211  | 3689194  | FrameShift R.KNRRKGC   | 0.994118 | 1  | TRUE  | 1  |
| chrIII | 4020041  | 4021854  | FrameShift L.PMILLLL   | 0.998744 | 1  | TRUE  | 1  |
| chrIII | 13283791 | 13292984 | NovelExon K.MASSAN     | 0.994646 | 1  | TRUE  | 1  |
| chrV   | 15080124 | 15082462 | NovelExon R.NHQKNQ     | 0.996207 | 1  | TRUE  | 1  |
| chrII  | 4710291  | 4713687  | FrameShift K.WREIKKV   | 0.997444 | 1  | TRUE  | 1  |
| chrX   | 777720   | 780513   | ReverseStr: K.NFLSDPLI | 0.999976 | 2  | TRUE  | 2  |
| chrII  | 11582783 | 11588468 | FrameShift R.KSHIWQI   | 0.998034 | 1  | TRUE  | 1  |
| chrV   | 5386094  | 5389432  | FrameShift K.FNLLTLFS  | 0.997252 | 1  | TRUE  | 1  |
| chrX   | 15259514 | 15260221 | ReverseStr: R.KKMVVA   | 0.999989 | 2  | TRUE  | 2  |
| chrIV  | 992289   | 997652   | NovelExon K.NPGKKSC    | 0.999792 | 1  | TRUE  | 1  |
| chrII  | 4939421  | 4940323  | FrameShift R.PMNYNLI   | 0.99528  | 1  | TRUE  | 1  |
| chrIII | 4860645  | 4861760  | ReverseStr: K.LKSYLNT  | 0.999972 | 2  | TRUE  | 2  |
| chrIV  | 16197016 | 16201385 | FrameShift K.WRMTFL    | 0.995188 | 1  | TRUE  | 1  |
| chrIII | 7293568  | 7308295  | NovelExon K.KCLKKAIM   | 0.997404 | 1  | TRUE  | 1  |
| chrII  | 11125310 | 11126310 | ReverseStr: K.EMPFSV   | 0.999995 | 2  | TRUE  | 2  |
| chrII  | 3387146  | 3387606  | GeneBound R.KMMKTT     | 0.999964 | 2  | FALSE | 2  |
| chrIV  | 15129630 | 15131754 | ReverseStr: .GDTGDK    | 0.999992 | 2  | TRUE  | 2  |
| chrIV  | 13241038 | 13243345 | GeneBound .DNVILATI    | 0.999985 | 4  | FALSE | 2  |
| chrX   | 6823851  | 6825798  | ReverseStr: K.RWHRES   | 0.999976 | 2  | FALSE | 2  |
| chrI   | 3199542  | 3203231  | NovelExon K.IIIWTRKS   | 0.997318 | 1  | TRUE  | 1  |
| chrI   | 13778884 | 13792153 | FrameShift R.TTAIGFG   | 0.995144 | 1  | TRUE  | 1  |
| chrIII | 12626474 | 12651656 | NovelExon R.HIAGFKN    | 0.997527 | 1  | TRUE  | 1  |
| chrI   | 2761188  | 2776099  | NovelExon .HKSETFTI    | 0.994297 | 1  | TRUE  | 1  |
| chrI   | 1211495  | 1254700  | NovelExon K.RSLEYIPK   | 0.997287 | 1  | TRUE  | 1  |
| chrV   | 14008733 | 14012203 | ReverseStr: F.CTFRSLTI | 1        | 4  | TRUE  | 4  |
| chrIII | 706329   | 715818   | NovelExon R.KISNSKEI   | 0.996305 | 1  | TRUE  | 1  |
| chrIV  | 9160625  | 9165112  | ExonBound G.DQSVDS     | 0.998584 | 1  | TRUE  | 1  |
| chrIV  | 13543375 | 13548208 | NovelExon .KTCVAIGI    | 0.994831 | 1  | TRUE  | 1  |
| chrX   | 4964378  | 4969328  | ReverseStr: .SIMSRLE   | 1        | 28 | FALSE | 18 |
| chrIII | 4384759  | 4387729  | NovelExon K.NFFVSEIF   | 0.998671 | 1  | TRUE  | 1  |
| chrX   | 9140386  | 9144488  | FrameShift K.MSLSGQI   | 0.996501 | 1  | TRUE  | 1  |
| chrIV  | 13031570 | 13034091 | FrameShift R.EAVKVDI   | 0.995697 | 1  | TRUE  | 1  |
| chrII  | 8964991  | 8966857  | FrameShift R.SIAVTMI   | 0.9942   | 1  | TRUE  | 1  |
| chrX   | 15262658 | 15267912 | NovelExon F.LLSLINWL   | 0.994104 | 1  | TRUE  | 1  |

|        |          |          |            |             |          |   |       |   |
|--------|----------|----------|------------|-------------|----------|---|-------|---|
| chrIII | 4999345  | 5001514  | FrameShift | _.YCRRYAR   | 0.99973  | 1 | TRUE  | 1 |
| chrV   | 20164803 | 20165839 | NovelGene  | R.ILNASSPF  | 0.999931 | 2 | FALSE | 2 |
| chrII  | 264353   | 266305   | GeneBounc  | K.ISGKSANI  | 0.999969 | 2 | FALSE | 2 |
| chrV   | 9526769  | 9529226  | FrameShift | K.KIMETSYI  | 0.998532 | 1 | TRUE  | 1 |
| chrIII | 7305914  | 7308300  | ExonBounc  | K.KCLKKAIM  | 0.997404 | 1 | TRUE  | 1 |
| chrI   | 10594463 | 10595514 | ReverseStr | Q.LMLLQYE   | 0.999978 | 2 | FALSE | 2 |
| chrII  | 8996962  | 8997602  | ReverseStr | R.LVSERYG'  | 0.99997  | 2 | TRUE  | 2 |
| chrII  | 3276260  | 3277309  | GeneBounc  | R.LHFCLLP\$ | 0.999976 | 2 | FALSE | 2 |
| chrV   | 20903946 | 20907401 | ExonBounc  | K.NMIIKSKI  | 0.996565 | 1 | TRUE  | 1 |
| chrII  | 2731324  | 2735255  | ReverseStr | K.YFFARSTI  | 0.999999 | 2 | TRUE  | 2 |
| chrIII | 4881878  | 4883542  | ReverseStr | R.ISMTTSG'  | 0.999949 | 2 | FALSE | 2 |
| chrIV  | 9760134  | 9764467  | FrameShift | H.WSFWNI    | 0.996131 | 1 | TRUE  | 1 |
| chrI   | 7918437  | 7926332  | ReverseStr | R.TRSTNEIk  | 1        | 3 | TRUE  | 3 |
| chrII  | 6179926  | 6184657  | NovelExon  | K.LGAETVV   | 0.997329 | 1 | TRUE  | 1 |
| chrV   | 11825870 | 11827048 | ReverseStr | K.LFCKIKTV  | 0.999947 | 2 | TRUE  | 2 |
| chrV   | 13408229 | 13409819 | GeneBounc  | K.LSKEHFYF  | 1        | 3 | FALSE | 3 |
| chrIII | 6746255  | 6794709  | FrameShift | R.LSTSIDGS  | 0.996533 | 1 | TRUE  | 1 |
| chrV   | 12450788 | 12453792 | FrameShift | K.MKSTTLN   | 0.997035 | 1 | TRUE  | 1 |
| chrII  | 3135584  | 3137907  | ReverseStr | _.FEAKMLK   | 0.999981 | 2 | TRUE  | 2 |
| chrIV  | 3258907  | 3263491  | FrameShift | K.KFGGTAT   | 0.995793 | 1 | TRUE  | 1 |
| chrV   | 14829162 | 14847297 | NovelExon  | K.ASVTEEN   | 0.994481 | 1 | TRUE  | 1 |
| chrIV  | 5357275  | 5364260  | ReverseStr | R.DTIFGNFI  | 0.999957 | 2 | TRUE  | 2 |
| chrI   | 8262033  | 8268985  | NovelExon  | R.LGPFSTF   | 0.999547 | 1 | TRUE  | 1 |
| chrI   | 14271883 | 14274193 | ReverseStr | _.KLNAKKC   | 0.999964 | 2 | FALSE | 2 |
| chrIV  | 3695779  | 3698429  | GeneBounc  | _.MTVSSKI,  | 1        | 3 | FALSE | 3 |
| chrV   | 998447   | 1003593  | FrameShift | _.HENAARF   | 0.999217 | 1 | TRUE  | 1 |
| chrV   | 9998690  | 9998857  | NovelGene  | _.MYDTAP\   | 0.999986 | 2 | FALSE | 2 |
| chrIII | 6749083  | 6794698  | FrameShift | L.TTSLISLGI | 0.998847 | 1 | TRUE  | 1 |
| chrII  | 10702174 | 10714240 | NovelExon  | R.LVLGFLGI  | 0.998517 | 1 | TRUE  | 1 |
| chrIII | 8016597  | 8020805  | FrameShift | K.PTCKIQK\$ | 0.995273 | 1 | TRUE  | 1 |
| chrIV  | 5295964  | 5297479  | ReverseStr | K.YPSNKLTO  | 1        | 4 | FALSE | 3 |
| chrII  | 7845610  | 7849745  | ReverseStr | K.FHKADLL   | 0.999943 | 2 | TRUE  | 2 |
| chrIII | 7573283  | 7575202  | GeneBounc  | K.YVNKEAV   | 1        | 6 | FALSE | 3 |
| chrIII | 11974016 | 11978965 | ReverseStr | I.TAICQFAK  | 1        | 3 | TRUE  | 3 |
| chrII  | 11097783 | 11100087 | GeneBounc  | K.TIGFGGQ   | 0.999997 | 3 | FALSE | 2 |
| chrX   | 13536981 | 13538042 | ReverseStr | R.MVGSGIK   | 0.999983 | 2 | TRUE  | 2 |
| chrIV  | 11110081 | 11111031 | ReverseStr | K.WSLQSVI   | 1        | 8 | TRUE  | 4 |
| chrV   | 1913599  | 1917037  | NovelExon  | K.KVEIFRIA  | 0.994656 | 1 | TRUE  | 1 |
| chrIII | 10896289 | 10901739 | FrameShift | K.ISEISEIFS | 0.996886 | 1 | TRUE  | 1 |
| chrV   | 14686145 | 14688528 | FrameShift | Q.KPDDISN   | 0.999967 | 2 | TRUE  | 2 |
| chrII  | 10805335 | 10809933 | FrameShift | R.KIFQILLQ  | 0.997573 | 1 | TRUE  | 1 |
| chrII  | 12582111 | 12603615 | ReverseStr | K.IFFYRSSN  | 0.999977 | 2 | TRUE  | 2 |
| chrI   | 6457284  | 6458481  | ReverseStr | K.ERESARC'  | 0.999999 | 2 | FALSE | 2 |
| chrIII | 10081414 | 10083194 | ReverseStr | R.LEVTLKRI  | 0.999955 | 2 | TRUE  | 2 |
| chrII  | 2988310  | 2991296  | ReverseStr | K.QKPKMTI   | 1        | 2 | FALSE | 2 |
| chrII  | 111644   | 114454   | FrameShift | R.PSWKSRF   | 0.998265 | 1 | TRUE  | 1 |
| chrV   | 18186037 | 18188232 | NovelExon  | K.MSELKMI   | 0.997021 | 1 | TRUE  | 1 |

|        |          |          |                        |          |   |       |   |
|--------|----------|----------|------------------------|----------|---|-------|---|
| chrV   | 19452154 | 19455940 | ReverseStr: K.WAKDGE   | 0.999979 | 2 | TRUE  | 2 |
| chrII  | 12582111 | 12603615 | FrameShift _ .MKMGIV   | 0.999592 | 2 | TRUE  | 1 |
| chrIII | 732142   | 738973   | ReverseStr: K.AEFDEQK  | 0.999961 | 3 | TRUE  | 2 |
| chrIII | 235843   | 253375   | GeneBound _ .NTMFREI   | 1        | 3 | FALSE | 3 |
| chrII  | 388833   | 392737   | ReverseStr: R.KTEEKLES | 0.999955 | 2 | FALSE | 2 |
| chrII  | 15120225 | 15123270 | ReverseStr: K.KFKPRAK  | 1        | 2 | TRUE  | 2 |
| chrI   | 9163941  | 9166821  | FrameShift _ .TIVFTVPL | 1        | 2 | TRUE  | 1 |
| chrIV  | 10009945 | 10014164 | FrameShift _ .WAKLEDG  | 0.997176 | 1 | TRUE  | 1 |
| chrI   | 9645690  | 9647667  | ReverseStr: K.IPQIDFVV | 1        | 3 | TRUE  | 3 |
| chrII  | 14912316 | 14915060 | NovelGene R.VKTGAKL    | 0.999988 | 2 | FALSE | 2 |
| chrX   | 15478949 | 15485632 | NovelExon K.MIRVGNP    | 0.996139 | 1 | TRUE  | 1 |
| chrIV  | 778784   | 784135   | FrameShift R.ITKKLFSA  | 0.995273 | 1 | TRUE  | 1 |
| chrI   | 14922954 | 14951782 | NovelExon K.SENFPNF    | 0.996493 | 1 | TRUE  | 1 |
| chrI   | 7869759  | 7872075  | GeneBound K.DTGAAN/    | 1        | 4 | FALSE | 4 |
| chrII  | 12654681 | 12663770 | FrameShift K.PETPILYS  | 0.994572 | 1 | TRUE  | 1 |
| chrIII | 13755841 | 13759350 | FrameShift K.NLEVFNS   | 0.994306 | 1 | TRUE  | 1 |
| chrV   | 20506472 | 20509477 | FrameShift R.MQKKEV    | 0.999855 | 1 | TRUE  | 1 |
| chrIII | 3730811  | 3731230  | GeneBound _ .MGLATIS   | 1        | 3 | FALSE | 3 |
| chrIII | 4900686  | 4903143  | GeneBound R.SKDQNTI    | 0.999982 | 2 | FALSE | 2 |
| chrII  | 13369535 | 13375220 | NovelExon K.NLEITFKM   | 0.994266 | 1 | TRUE  | 1 |
| chrIII | 11317471 | 11326553 | FrameShift K.TVGKSSN   | 0.996286 | 1 | TRUE  | 1 |
| chrV   | 4956815  | 4958558  | FrameShift K.ICKINCSIF | 0.999813 | 1 | TRUE  | 1 |
| chrII  | 2481926  | 2485927  | ReverseStr: G.HTKKNVF  | 0.999977 | 2 | FALSE | 2 |
| chrIV  | 3698508  | 3699718  | FrameShift R.RFKWQR    | 1        | 2 | TRUE  | 2 |
| chrIII | 12173462 | 12177144 | FrameShift K.RMRSRNI   | 0.994728 | 1 | TRUE  | 1 |
| chrI   | 1386259  | 1392761  | ReverseStr: K.SKNNAKL  | 0.999998 | 2 | TRUE  | 2 |
| chrV   | 19264568 | 19269632 | ReverseStr: K.TQLQVLH  | 0.999998 | 3 | TRUE  | 2 |
| chrV   | 19167606 | 19168223 | NovelGene L.SQFGKYQ    | 0.999972 | 2 | FALSE | 2 |
| chrIV  | 6863225  | 6863300  | NovelGene K.QLLQKCS    | 0.999953 | 2 | FALSE | 2 |
| chrII  | 1092013  | 1097906  | FrameShift K.RVSQWE    | 0.999202 | 1 | TRUE  | 1 |
| chrI   | 14665168 | 14674811 | NovelExon K.IGANNTS    | 0.995255 | 1 | TRUE  | 1 |
| chrV   | 6379265  | 6380102  | NovelGene K.KVIVEQEI   | 0.999976 | 2 | FALSE | 2 |
| chrX   | 12705553 | 12808179 | NovelExon K.NYQFLVC    | 0.998102 | 1 | TRUE  | 1 |
| chrII  | 13855713 | 13872222 | NovelExon K.FDENCQK    | 0.995045 | 1 | TRUE  | 1 |
| chrX   | 4427203  | 4428574  | NovelGene K.GFVSTAF    | 0.999976 | 2 | FALSE | 2 |
| chrI   | 3547094  | 3552015  | NovelExon K.SKKFMFF    | 0.997561 | 1 | TRUE  | 1 |
| chrV   | 15712187 | 15715625 | ReverseStr: R.DFSSQKP  | 0.999998 | 2 | TRUE  | 2 |
| chrII  | 8669083  | 8677828  | ReverseStr: R.WLMAQI   | 0.999971 | 2 | TRUE  | 2 |
| chrX   | 7097420  | 7100297  | NovelExon R.RKVVWC     | 0.998329 | 1 | TRUE  | 1 |
| chrI   | 8377596  | 8392747  | ReverseStr: K.KPMEILYI | 1        | 3 | TRUE  | 3 |
| chrI   | 2907748  | 2924717  | NovelExon K.KVKGGVF    | 0.996628 | 1 | TRUE  | 1 |
| chrI   | 13840694 | 13841834 | GeneBound _ .KKSIIICK  | 1        | 3 | FALSE | 3 |
| chrV   | 14642725 | 14645937 | ReverseStr: R.SPREAMKS | 0.999988 | 2 | TRUE  | 2 |
| chrIII | 706329   | 715818   | NovelExon R.IIFAGGA/   | 0.999331 | 1 | TRUE  | 1 |
| chrIV  | 15167768 | 15175504 | ReverseStr: L.YAMQKLI  | 0.999962 | 2 | TRUE  | 2 |
| chrII  | 7152611  | 7155433  | FrameShift S.THRHVAS   | 0.997101 | 1 | TRUE  | 1 |
| chrIII | 1103214  | 1112288  | ReverseStr: K.LFCKTVLF | 1        | 4 | TRUE  | 4 |

|        |          |          |            |            |          |   |       |   |
|--------|----------|----------|------------|------------|----------|---|-------|---|
| chrII  | 1769128  | 1771056  | GeneBound  | K.FFFKMFE  | 0.999959 | 3 | FALSE | 2 |
| chrX   | 4271141  | 4274205  | ReverseStr | K.LVFNNQM  | 0.999928 | 2 | TRUE  | 2 |
| chrIII | 3112795  | 3127109  | ReverseStr | R.NQRPLA\  | 1        | 5 | TRUE  | 5 |
| chrIII | 11020341 | 11025182 | ExonBound  | K.IKYKTKFS | 0.994893 | 1 | TRUE  | 1 |
| chrIV  | 7231224  | 7232727  | GeneBound  | R.MPSSSSS  | 0.999997 | 3 | FALSE | 2 |
| chrX   | 14335428 | 14336587 | ReverseStr | K.SVCGKRR  | 1        | 3 | TRUE  | 3 |
| chrII  | 2443297  | 2451145  | ExonBound  | _.KIFQTDI  | 0.995568 | 1 | TRUE  | 1 |
| chrIV  | 8261131  | 8266441  | NovelExon  | R.QLVVMG   | 1        | 3 | TRUE  | 3 |
| chrIII | 771573   | 772699   | GeneBound  | R.ISLLVEMF | 0.999996 | 2 | FALSE | 2 |
| chrII  | 7106377  | 7110016  | ExonBound  | K.FSAVNTA  | 0.999039 | 1 | TRUE  | 1 |
| chrV   | 18616571 | 18620213 | NovelExon  | K.IIPKSKN  | 0.994358 | 1 | TRUE  | 1 |
| chrIII | 4868298  | 4868733  | ReverseStr | R.MVCSLEE  | 1        | 3 | FALSE | 3 |
| chrIII | 11933902 | 11946917 | NovelExon  | K.IYFKNPKI | 0.998738 | 1 | TRUE  | 1 |
| chrI   | 6476803  | 6488984  | NovelExon  | R.FRKNQPI  | 0.996211 | 1 | TRUE  | 1 |
| chrX   | 944936   | 948882   | ReverseStr | K.FPKSGSSI | 0.999946 | 2 | TRUE  | 2 |
| chrI   | 4721207  | 4723961  | FrameShift | K.MGKLSTC  | 0.998898 | 1 | TRUE  | 1 |
| chrX   | 9213923  | 9217402  | NovelExon  | _.NSDNDHI  | 0.99489  | 1 | TRUE  | 1 |
| chrX   | 3353234  | 3355281  | NovelGene  | R.FKDLDCG  | 1        | 3 | FALSE | 3 |
| chrIII | 4078416  | 4082770  | GeneBound  | _.RVLREKYI | 0.99998  | 3 | FALSE | 2 |
| chrI   | 10050682 | 10062017 | ReverseStr | R.AYFHVTM  | 0.999994 | 2 | TRUE  | 2 |
| chrI   | 803371   | 834811   | NovelExon  | _.ELCVFSP/ | 0.999703 | 1 | TRUE  | 1 |
| chrV   | 11817764 | 11822510 | ReverseStr | R.METSKV/  | 0.999931 | 2 | TRUE  | 2 |
| chrIII | 9602942  | 9608647  | ExonBound  | R.VPKVEKP  | 0.996292 | 1 | TRUE  | 1 |
| chrX   | 2079830  | 2081727  | ReverseStr | E.ERVEETH  | 0.999941 | 2 | FALSE | 2 |
| chrII  | 2017801  | 2018865  | NovelExon  | R.PHHSPVR  | 0.998826 | 1 | TRUE  | 1 |
| chrI   | 12462166 | 12465821 | FrameShift | K.SQVLPKP  | 0.997785 | 1 | TRUE  | 1 |
| chrI   | 11429062 | 11432054 | ReverseStr | K.LIEFSCQA | 1        | 3 | TRUE  | 3 |
| chrIV  | 13055333 | 13055744 | ReverseStr | K.FLISKELE | 1        | 4 | FALSE | 3 |
| chrIII | 1226877  | 1228898  | NovelGene  | R.LVFGENL  | 0.999965 | 2 | FALSE | 2 |
| chrIV  | 10523415 | 10524125 | ReverseStr | K.NRTLGS   | 0.999989 | 2 | FALSE | 2 |
| chrII  | 4996389  | 4998027  | FrameShift | K.EPKCSLN  | 0.996123 | 1 | TRUE  | 1 |
| chrV   | 5634395  | 5640328  | NovelGene  | K.KFWREVC  | 1        | 4 | FALSE | 4 |
| chrX   | 5971660  | 5977819  | ReverseStr | _.NSVTLIQI | 0.999975 | 2 | FALSE | 2 |
| chrII  | 691888   | 693463   | ExonBound  | K.TSGFVTR  | 1        | 1 | TRUE  | 1 |
| chrIV  | 2597619  | 2598103  | ReverseStr | K.SKSKKKG  | 1        | 4 | TRUE  | 4 |
| chrIII | 10314502 | 10318070 | ReverseStr | R.HKEHENE  | 0.999997 | 2 | TRUE  | 2 |
| chrII  | 4702066  | 4703261  | FrameShift | _.DWPML    | 0.998241 | 1 | TRUE  | 1 |
| chrIV  | 13312365 | 13314600 | NovelGene  | _.MTAQGK   | 0.999977 | 2 | FALSE | 2 |
| chrV   | 15184689 | 15185789 | GeneBound  | R.RTNLELS/ | 0.999997 | 2 | FALSE | 2 |
| chrX   | 9291592  | 9293587  | GeneBound  | _.NIKFKHYC | 0.999989 | 2 | FALSE | 2 |
| chrIII | 940868   | 943447   | NovelExon  | _.RKDFLAD  | 0.99708  | 1 | TRUE  | 1 |
| chrII  | 14754593 | 14778061 | ReverseStr | K.IEILKFKP | 0.999995 | 2 | TRUE  | 2 |
| chrI   | 4212744  | 4214263  | ReverseStr | K.MFINFDI  | 0.999941 | 2 | TRUE  | 2 |
| chrV   | 16202789 | 16204882 | NovelExon  | R.EVLYLSD  | 0.996949 | 1 | TRUE  | 1 |
| chrIII | 13576087 | 13580562 | FrameShift | R.IMGMTT   | 0.996717 | 1 | TRUE  | 1 |
| chrV   | 18860271 | 18861828 | ExonBound  | K.NFDFFRK  | 0.996183 | 1 | TRUE  | 1 |
| chrIV  | 15192267 | 15202991 | ReverseStr | C.VQEFLIHI | 0.999944 | 2 | TRUE  | 2 |

|        |          |          |            |            |          |   |       |   |
|--------|----------|----------|------------|------------|----------|---|-------|---|
| chrII  | 11058048 | 11089398 | NovelExon  | R.HLFMRE\  | 0.996341 | 1 | TRUE  | 1 |
| chrII  | 9618581  | 9624117  | ReverseStr | K.MMDLM    | 0.999973 | 2 | FALSE | 2 |
| chrI   | 9124686  | 9126079  | GeneBound  | _.LIIIGGGV | 0.999996 | 2 | FALSE | 2 |
| chrII  | 12787760 | 12796389 | NovelExon  | R.FFWRKNI  | 0.999521 | 1 | TRUE  | 1 |
| chrIII | 13165111 | 13169419 | NovelExon  | R.YFKWEFC  | 0.996978 | 1 | TRUE  | 1 |
| chrIV  | 172271   | 176811   | NovelGene  | K.WSQPGS   | 1        | 3 | FALSE | 3 |
| chrX   | 7132164  | 7139622  | NovelExon  | K.ILSDFLI  | 0.998117 | 1 | TRUE  | 1 |
| chrII  | 14550838 | 14552410 | ReverseStr | K.FFENFKKI | 0.999953 | 2 | TRUE  | 2 |
| chrI   | 13162488 | 13182797 | NovelExon  | K.NETSWP   | 0.998331 | 1 | TRUE  | 1 |
| chrV   | 8217845  | 8221296  | ReverseStr | K.SINQYF   | 1        | 3 | TRUE  | 3 |
| chrIV  | 4213570  | 4218241  | FrameShift | R.RRLGHIG  | 0.998672 | 1 | TRUE  | 1 |
| chrII  | 7627727  | 7651163  | ReverseStr | K.MEKSAK   | 1        | 5 | TRUE  | 5 |
| chrI   | 14909229 | 14913062 | GeneBound  | K.ERPFFHG  | 0.999976 | 2 | FALSE | 2 |
| chrIV  | 4772084  | 4775181  | GeneBound  | W.MDDPIP   | 0.999919 | 2 | FALSE | 2 |
| chrI   | 12505088 | 12508054 | FrameShift | _.QSMWSF   | 0.994635 | 1 | TRUE  | 1 |
| chrII  | 2808172  | 2812872  | ReverseStr | R.KYVGGLS  | 0.999974 | 2 | TRUE  | 2 |
| chrI   | 12239151 | 12241799 | ReverseStr | R.LVRFQKL  | 0.999953 | 2 | TRUE  | 2 |
| chrIV  | 16522493 | 16526099 | NovelExon  | _.HSATIGT  | 0.997473 | 1 | TRUE  | 1 |
| chrII  | 7808174  | 7809171  | NovelGene  | R.NNTKVAI  | 0.999996 | 2 | FALSE | 2 |
| chrII  | 14434477 | 14436650 | GeneBound  | K.NVSMEM   | 0.999979 | 2 | FALSE | 2 |
| chrV   | 16462417 | 16466336 | ExonBound  | K.MGAYIN/  | 0.996712 | 1 | TRUE  | 1 |
| chrI   | 13814769 | 13815451 | GeneBound  | K.SWKSVQI  | 0.999985 | 2 | FALSE | 2 |
| chrII  | 9628436  | 9629837  | NovelGene  | K.MDEKMK   | 1        | 3 | FALSE | 3 |
| chrV   | 19697543 | 19705161 | FrameShift | R.RNTRNHI  | 0.997577 | 1 | TRUE  | 1 |
| chrV   | 14773342 | 14777316 | GeneBound  | R.NPNKRK   | 0.999971 | 2 | FALSE | 2 |
| chrX   | 681128   | 682779   | NovelExon  | R.RDLTFSAI | 0.999597 | 1 | TRUE  | 1 |
| chrIV  | 10126736 | 10128934 | GeneBound  | K.DCTTNG   | 0.999968 | 2 | FALSE | 2 |
| chrIV  | 6887937  | 6897766  | GeneBound  | R.VWEMG    | 0.999976 | 2 | FALSE | 2 |
| chrX   | 5101001  | 5106142  | FrameShift | R.DEEQSDE  | 0.999646 | 1 | TRUE  | 1 |
| chrIV  | 14003668 | 14012049 | NovelExon  | K.KFKKFDK  | 0.998473 | 1 | TRUE  | 1 |
| chrII  | 7912715  | 7928604  | ReverseStr | Y.VKLSPAG  | 0.999999 | 3 | TRUE  | 3 |
| chrI   | 12490225 | 12490816 | ExonBound  | K.RIHDANR  | 0.997323 | 1 | TRUE  | 1 |
| chrV   | 16764236 | 16788393 | NovelExon  | K.TCDVSTLI | 0.997985 | 1 | TRUE  | 1 |
| chrV   | 13207749 | 13208772 | ReverseStr | _.QKMEEKI  | 0.999983 | 2 | FALSE | 2 |
| chrIII | 13260490 | 13262795 | FrameShift | K.GERRQA/  | 0.996212 | 1 | TRUE  | 1 |
| chrI   | 111038   | 112417   | GeneBound  | K.LDVIWYK  | 0.999982 | 2 | FALSE | 2 |
| chrII  | 678001   | 678354   | FrameShift | R.SRFTRILL | 0.997851 | 1 | TRUE  | 1 |
| chrII  | 3329720  | 3331809  | FrameShift | R.VGFFEAA  | 0.994398 | 1 | TRUE  | 1 |
| chrII  | 7082060  | 7084343  | FrameShift | K.PSNKMTI  | 0.996082 | 1 | TRUE  | 1 |
| chrX   | 4707159  | 4709783  | ReverseStr | R.LSEIAGV  | 0.999952 | 2 | TRUE  | 2 |
| chrIII | 2988247  | 2990048  | ReverseStr | R.RHFVDKY  | 0.999989 | 2 | FALSE | 2 |
| chrI   | 6758169  | 6760168  | FrameShift | E.NLMNKE/  | 0.999517 | 1 | TRUE  | 1 |
| chrIII | 5890354  | 5895968  | ReverseStr | K.KTKNDEE  | 0.999994 | 2 | TRUE  | 2 |
| chrI   | 12183679 | 12188998 | ReverseStr | R.RSCAVYF  | 1        | 3 | TRUE  | 3 |
| chrV   | 835804   | 839100   | FrameShift | K.KGGSSSA  | 0.998192 | 1 | TRUE  | 1 |
| chrIV  | 583813   | 585912   | FrameShift | K.KIILMMN  | 0.996064 | 1 | TRUE  | 1 |
| chrIV  | 10368586 | 10373115 | FrameShift | K.VTVSMG   | 0.997771 | 1 | TRUE  | 1 |



|        |          |          |                        |          |   |       |   |
|--------|----------|----------|------------------------|----------|---|-------|---|
| chrII  | 406138   | 410928   | ReverseStr: R.RATNPPR  | 0.999997 | 3 | TRUE  | 2 |
| chrII  | 13098179 | 13116731 | NovelExon K.CKKMEKC    | 1        | 1 | TRUE  | 1 |
| chrV   | 18125679 | 18127177 | ReverseStr: R.SRRAACS  | 1        | 3 | TRUE  | 3 |
| chrII  | 11343659 | 11345556 | ExonBounc K.TFLFPAP    | 0.995056 | 1 | TRUE  | 1 |
| chrV   | 5114730  | 5119194  | NovelExon R.QVAGKG     | 0.998188 | 1 | TRUE  | 1 |
| chrIII | 6675748  | 6703943  | NovelExon _ .TYLLRNP   | 0.994081 | 1 | TRUE  | 1 |
| chrI   | 7684944  | 7694208  | NovelExon R.SASFMSC    | 0.999423 | 1 | TRUE  | 1 |
| chrI   | 10720815 | 10723580 | FrameShift R.SSAVSRIA  | 0.995606 | 1 | TRUE  | 1 |
| chrIII | 895775   | 900144   | ReverseStr: R.VHAAADI  | 0.999928 | 2 | TRUE  | 2 |
| chrI   | 2568874  | 2570748  | FrameShift K.KNSIFQP   | 0.995774 | 1 | TRUE  | 1 |
| chrIII | 13464583 | 13466289 | ReverseStr: R.IWNPFLP  | 1        | 3 | FALSE | 3 |
| chrV   | 3280376  | 3282701  | NovelExon K.HDSTMLI    | 0.99788  | 1 | TRUE  | 1 |
| chrII  | 1860633  | 1861085  | GeneBounc K.GKFHFGC    | 1        | 5 | FALSE | 4 |
| chrIII | 1185238  | 1193804  | NovelExon K.SLKIDNFV   | 0.998809 | 1 | TRUE  | 1 |
| chrV   | 20356771 | 20365687 | NovelExon L.TEQSVFK    | 0.995826 | 1 | TRUE  | 1 |
| chrIII | 1079455  | 1080471  | ReverseStr: R.GKFAFLH  | 1        | 3 | FALSE | 3 |
| chrV   | 3460216  | 3462952  | FrameShift R.KIMLHKL   | 0.997254 | 1 | TRUE  | 1 |
| chrIII | 5564985  | 5567344  | TranslatedI R.EMVFFFS  | 0.999997 | 4 | TRUE  | 2 |
| chrX   | 4588741  | 4590420  | ExonBounc K.KMGYVSI    | 0.996198 | 1 | TRUE  | 1 |
| chrV   | 5699994  | 5701066  | ReverseStr: R.CKMRTET  | 0.999903 | 2 | FALSE | 2 |
| chrX   | 8283228  | 8285167  | ReverseStr: R.MRQFYI   | 1        | 3 | TRUE  | 3 |
| chrIII | 3345910  | 3363419  | ReverseStr: R.PELKIAG  | 0.999998 | 4 | TRUE  | 2 |
| chrII  | 15064615 | 15071590 | NovelExon K.SKNHKN     | 0.996543 | 1 | TRUE  | 1 |
| chrX   | 12604893 | 12605103 | GeneBounc R.GALVAAF    | 0.999948 | 2 | FALSE | 2 |
| chrIV  | 10444589 | 10448918 | NovelExon K.DEGSVVK    | 0.996189 | 1 | TRUE  | 1 |
| chrIII | 9145248  | 9145899  | ExonBounc _ .NKACLLSI  | 0.99456  | 1 | TRUE  | 1 |
| chrV   | 13264532 | 13269849 | ReverseStr: R.KTKMNV   | 0.999963 | 2 | TRUE  | 2 |
| chrIII | 13463075 | 13464556 | FrameShift K.VLRHQKF   | 0.999348 | 1 | TRUE  | 1 |
| chrIII | 3068309  | 3069204  | FrameShift R.KPRRSSI   | 0.997818 | 1 | TRUE  | 1 |
| chrX   | 3926061  | 3929472  | FrameShift R.RSALLCRI  | 0.997411 | 1 | TRUE  | 1 |
| chrX   | 5101001  | 5106142  | FrameShift _ .TITEQIQE | 0.995639 | 1 | TRUE  | 1 |
| chrX   | 16159577 | 16163477 | NovelExon K.IKNFNAQ    | 0.994259 | 1 | TRUE  | 1 |
| chrIV  | 4572236  | 4590290  | NovelExon R.REVMKEI    | 0.996929 | 1 | TRUE  | 1 |
| chrIII | 8944738  | 8952870  | FrameShift K.TCEESGA   | 0.996924 | 1 | TRUE  | 1 |
| chrI   | 3854164  | 3859297  | NovelExon K.KTVLVKIF   | 0.99746  | 1 | TRUE  | 1 |
| chrII  | 8280805  | 8283160  | ReverseStr: R.LDVSDVK  | 0.999928 | 2 | FALSE | 2 |
| chrII  | 1115648  | 1118040  | GeneBounc K.RPFWSYV    | 0.999937 | 2 | FALSE | 2 |
| chrII  | 3096067  | 3096960  | FrameShift R.LELKLELF  | 0.994229 | 1 | TRUE  | 1 |
| chrV   | 13909734 | 13911510 | NovelExon K.NLSVNQL    | 0.995388 | 1 | TRUE  | 1 |
| chrII  | 11345881 | 11347893 | FrameShift K.RMYHRKI   | 0.995042 | 1 | TRUE  | 1 |
| chrX   | 6216907  | 6220027  | NovelGene K.PYTIAGKI   | 1        | 4 | FALSE | 4 |
| chrII  | 2816981  | 2819128  | ReverseStr: R.PDMQTL   | 0.999996 | 2 | TRUE  | 2 |
| chrII  | 2473529  | 2479095  | ReverseStr: K.IPQYNYR  | 0.999996 | 2 | TRUE  | 2 |
| chrIII | 7091280  | 7093353  | FrameShift K.FWIKSLR   | 0.997332 | 1 | TRUE  | 1 |
| chrII  | 12189813 | 12199895 | FrameShift K.SPDSGDF   | 0.999672 | 1 | TRUE  | 1 |
| chrI   | 10049044 | 10050706 | GeneBounc _ .LKFSENKI  | 0.999994 | 2 | FALSE | 2 |
| chrV   | 7771309  | 7773530  | GeneBounc S.KITKFACL   | 0.999963 | 2 | FALSE | 2 |

|        |          |          |            |             |          |   |       |   |
|--------|----------|----------|------------|-------------|----------|---|-------|---|
| chrIV  | 8886513  | 8888589  | FrameShift | K.QNGILKR   | 0.996142 | 1 | TRUE  | 1 |
| chrI   | 14790233 | 14790928 | FrameShift | R.GTSHFES   | 0.99435  | 1 | TRUE  | 1 |
| chrIV  | 4599946  | 4602768  | FrameShift | R.IITQLLFKI | 0.994181 | 1 | TRUE  | 1 |
| chrV   | 8302867  | 8304449  | ReverseStr | R.NRQNLGI   | 1        | 2 | TRUE  | 2 |
| chrX   | 7823603  | 7825709  | NovelExon  | _.SGCVQDF   | 0.999015 | 1 | TRUE  | 1 |
| chrII  | 11759618 | 11761789 | FrameShift | R.NTRIPTKI  | 0.998071 | 1 | TRUE  | 1 |
| chrV   | 10013250 | 10028135 | NovelExon  | _.YFLKDDIF  | 0.997924 | 1 | TRUE  | 1 |
| chrX   | 12857949 | 12859471 | FrameShift | R.AKWQQF    | 0.998031 | 1 | TRUE  | 1 |
| chrIV  | 13048472 | 13049811 | GeneBounc  | _.RIPRMKN   | 0.999997 | 3 | FALSE | 2 |
| chrII  | 11439113 | 11439698 | ReverseStr | R.SQKNMM    | 0.999972 | 3 | FALSE | 2 |
| chrII  | 1115648  | 1118040  | NovelExon  | K.IPKMPVY   | 0.997321 | 1 | TRUE  | 1 |
| chrV   | 18751239 | 18752271 | FrameShift | N.RPSFSRG   | 0.998006 | 1 | TRUE  | 1 |
| chrIII | 2970669  | 2975777  | NovelExon  | _.WGYCRG    | 0.998514 | 1 | TRUE  | 1 |
| chrIV  | 771603   | 772797   | FrameShift | K.NVGESKK   | 0.995071 | 1 | TRUE  | 1 |
| chrIV  | 17131509 | 17137510 | NovelExon  | _.RHTPSSV   | 0.995768 | 1 | TRUE  | 1 |
| chrX   | 2957924  | 2968157  | ReverseStr | R.NIIFSQT   | 0.999983 | 2 | TRUE  | 2 |
| chrIV  | 132416   | 138076   | ReverseStr | F.QGEKGEF   | 0.999983 | 2 | FALSE | 2 |
| chrI   | 9416696  | 9418869  | FrameShift | R.CILTHNG   | 0.997032 | 1 | TRUE  | 1 |
| chrX   | 4972529  | 4997567  | ReverseStr | _.ESKMSVV   | 1        | 4 | TRUE  | 4 |
| chrII  | 8487318  | 8508914  | ReverseStr | R.EAAVKTH   | 1        | 3 | TRUE  | 3 |
| chrIV  | 461112   | 481167   | NovelExon  | R.AGEKTVK   | 0.998503 | 1 | TRUE  | 1 |
| chrI   | 12819206 | 12824795 | NovelExon  | K.LFKSSKM   | 0.999547 | 1 | TRUE  | 1 |
| chrX   | 12503893 | 12513979 | FrameShift | Y.NNCKLNS   | 0.995443 | 1 | TRUE  | 1 |
| chrIV  | 14825647 | 14826428 | FrameShift | R.RREDKSD   | 0.998495 | 2 | TRUE  | 1 |
| chrX   | 8620518  | 8625187  | ExonBounc  | R.HRADMI    | 0.996462 | 1 | TRUE  | 1 |
| chrI   | 837999   | 841750   | FrameShift | I.FDKLIFHR  | 0.994116 | 1 | TRUE  | 1 |
| chrII  | 13406090 | 13411210 | FrameShift | R.FWKEFEK   | 0.998783 | 1 | TRUE  | 1 |
| chrIII | 11971366 | 11973992 | GeneBounc  | _.KNRKNVI   | 0.999972 | 2 | FALSE | 2 |
| chrI   | 9847398  | 9850071  | ExonBounc  | K.DSAPLGK   | 0.994733 | 1 | TRUE  | 1 |
| chrI   | 2707601  | 2717551  | ReverseStr | K.KHRKSKC   | 0.999963 | 2 | FALSE | 2 |
| chrIV  | 2436514  | 2463368  | NovelExon  | K.NSKKFEN   | 0.996795 | 1 | TRUE  | 1 |
| chrV   | 919718   | 925946   | FrameShift | R.MRSKAG    | 0.998451 | 1 | TRUE  | 1 |
| chrIII | 3583850  | 3586471  | NovelGene  | K.LVDAVYY   | 0.999986 | 2 | FALSE | 2 |
| chrX   | 8673008  | 8681601  | NovelExon  | R.IPIKTKKV  | 0.995159 | 1 | TRUE  | 1 |
| chrI   | 5788634  | 5791755  | ReverseStr | R.QVSLSS    | 0.999986 | 2 | TRUE  | 2 |
| chrIII | 6587811  | 6589345  | ExonBounc  | R.SFSIDHV   | 0.994392 | 1 | TRUE  | 1 |
| chrX   | 13191177 | 13193886 | FrameShift | R.HRFEEVS   | 0.997473 | 1 | TRUE  | 1 |
| chrX   | 16088828 | 16090461 | NovelGene  | K.KASFEIV   | 1        | 3 | FALSE | 3 |
| chrI   | 6329538  | 6330185  | ReverseStr | R.MSPQYLI   | 0.999943 | 2 | TRUE  | 2 |
| chrX   | 16944804 | 16947953 | FrameShift | K.TSSSFAQ   | 0.994946 | 1 | TRUE  | 1 |
| chrV   | 15000634 | 15002178 | ReverseStr | R.KKTAPLSI  | 1        | 3 | FALSE | 3 |
| chrX   | 325962   | 334587   | FrameShift | K.KTRQAG    | 0.998783 | 1 | TRUE  | 1 |
| chrI   | 11747419 | 11792109 | ReverseStr | K.LTEFQIFG  | 0.999992 | 2 | TRUE  | 2 |
| chrX   | 13930830 | 13931965 | ExonBounc  | K.YDRVPVS   | 0.998491 | 1 | TRUE  | 1 |
| chrX   | 1502875  | 1503214  | GeneBounc  | K.KFIQNLN   | 0.999999 | 7 | FALSE | 2 |
| chrIV  | 7924341  | 7924955  | GeneBounc  | _.DDAGMA    | 1        | 2 | FALSE | 2 |
| chrI   | 13438055 | 13450207 | NovelExon  | R.EIWALVII  | 0.994381 | 1 | TRUE  | 1 |

|        |          |          |            |             |          |    |       |   |
|--------|----------|----------|------------|-------------|----------|----|-------|---|
| chrIV  | 7466690  | 7469821  | NovelExon  | K.PFNRLFVI  | 0.997536 | 1  | TRUE  | 1 |
| chrI   | 12181068 | 12183245 | ExonBounc  | R.KFAPVSFI  | 0.997975 | 1  | TRUE  | 1 |
| chrIII | 1081394  | 1095063  | NovelExon  | K.KKLSGGK   | 0.995673 | 1  | TRUE  | 1 |
| chrX   | 13727229 | 13733601 | ReverseStr | K.LKKVGEIK  | 0.999997 | 2  | TRUE  | 2 |
| chrIV  | 14276440 | 14285499 | FrameShift | K.KVEMGQ    | 0.995533 | 1  | TRUE  | 1 |
| chrIV  | 12355687 | 12360770 | ReverseStr | R.GGRISPR   | 1        | 3  | TRUE  | 3 |
| chrIII | 4475887  | 4476856  | FrameShift | S.YDLHGDS   | 1        | 1  | TRUE  | 1 |
| chrV   | 12288901 | 12291641 | FrameShift | K.QKSNWH    | 0.999992 | 2  | TRUE  | 2 |
| chrIV  | 6334204  | 6335164  | ExonBounc  | R.QLADNM    | 0.994231 | 1  | TRUE  | 1 |
| chrX   | 12898578 | 12901423 | NovelGene  | R.RENVEHC   | 1        | 3  | FALSE | 3 |
| chrX   | 17065029 | 17069134 | ReverseStr | R.VAGESCS   | 1        | 3  | TRUE  | 3 |
| chrII  | 6810920  | 6816411  | FrameShift | K.MKKNKLI   | 0.996141 | 1  | TRUE  | 1 |
| chrIII | 8409424  | 8411947  | GeneBounc  | R.NVAMLA    | 0.999998 | 2  | FALSE | 2 |
| chrIII | 13346984 | 13356266 | GeneBounc  | R.INSEGTP   | 1        | 3  | FALSE | 3 |
| chrIII | 4476857  | 4477552  | ReverseStr | S.YDLHGDS   | 1        | 3  | FALSE | 3 |
| chrV   | 12608153 | 12608953 | FrameShift | R.LNMHREI   | 0.997809 | 1  | TRUE  | 1 |
| chrV   | 459770   | 462076   | ReverseStr | K.FKFSRKIL  | 0.99994  | 2  | TRUE  | 2 |
| chrIII | 12074190 | 12077456 | ReverseStr | R.QLSTTGS   | 1        | 3  | TRUE  | 3 |
| chrII  | 11743329 | 11748548 | ReverseStr | T.YYQQFVY   | 1        | 8  | TRUE  | 6 |
| chrIV  | 3663631  | 3664405  | FrameShift | _.MGNGPV    | 0.994152 | 1  | TRUE  | 1 |
| chrX   | 9810173  | 9822215  | FrameShift | K.KLRSACA   | 0.999063 | 1  | TRUE  | 1 |
| chrX   | 3252951  | 3256164  | FrameShift | R.FNLSTGA   | 0.997799 | 1  | TRUE  | 1 |
| chrX   | 3827212  | 3829281  | NovelExon  | K.ESPVTRR   | 0.996105 | 1  | TRUE  | 1 |
| chrIV  | 10130344 | 10133255 | ReverseStr | L.RNTRNDM   | 0.999968 | 2  | FALSE | 2 |
| chrI   | 14097543 | 14101071 | NovelExon  | K.IDFFQFFK  | 0.998019 | 1  | TRUE  | 1 |
| chrIII | 12715622 | 12743828 | FrameShift | V.YGVDTTG   | 0.99748  | 1  | TRUE  | 1 |
| chrIII | 9002712  | 9004760  | GeneBounc  | R.SSIEWIF   | 1        | 3  | FALSE | 3 |
| chrI   | 12655214 | 12655960 | ReverseStr | _.KNATFSFI  | 1        | 12 | FALSE | 3 |
| chrII  | 7033751  | 7034134  | NovelGene  | Q.EMKEVG    | 0.999958 | 2  | FALSE | 2 |
| chrIV  | 1027754  | 1030024  | NovelExon  | K.KISKKFQK  | 0.994953 | 1  | TRUE  | 1 |
| chrII  | 13278105 | 13304159 | Translated | K.EVDREGG   | 0.999969 | 2  | TRUE  | 2 |
| chrV   | 9966380  | 9976202  | ReverseStr | R.GCMRAR    | 0.99996  | 2  | FALSE | 2 |
| chrI   | 614656   | 629449   | NovelExon  | K.KSEKSIID  | 0.999743 | 1  | TRUE  | 1 |
| chrIII | 7895692  | 7896914  | ReverseStr | K.KNKICNN   | 0.999999 | 3  | TRUE  | 3 |
| chrI   | 2857399  | 2857595  | NovelGene  | K.NCRNNAI   | 0.999985 | 2  | FALSE | 2 |
| chrII  | 13406090 | 13411210 | FrameShift | K.KNVFFFD   | 0.999566 | 1  | TRUE  | 1 |
| chrI   | 8083578  | 8095569  | GeneBounc  | R.NSGIKGIT  | 1        | 3  | FALSE | 3 |
| chrIV  | 3000539  | 3011197  | NovelExon  | R.IIFAISCSM | 0.996623 | 1  | TRUE  | 1 |
| chrII  | 6868899  | 6870796  | GeneBounc  | K.QETTLQF   | 0.999996 | 2  | FALSE | 2 |
| chrIII | 4216743  | 4228067  | NovelExon  | R.GGIFTSTL  | 0.996207 | 1  | TRUE  | 1 |
| chrIII | 1824910  | 1834136  | NovelExon  | R.QFGPTV    | 0.995427 | 1  | TRUE  | 1 |
| chrIII | 3226343  | 3230643  | NovelExon  | K.ICTICLTI  | 0.99785  | 1  | TRUE  | 1 |
| chrIV  | 9401972  | 9412850  | ExonBounc  | R.LADGTPF   | 0.99683  | 1  | TRUE  | 1 |
| chrI   | 14569506 | 14580967 | NovelExon  | K.KMVEAH    | 0.995799 | 1  | TRUE  | 1 |
| chrIV  | 7428915  | 7444651  | ReverseStr | K.WWLFSP    | 0.999931 | 2  | TRUE  | 2 |
| chrV   | 709109   | 710567   | FrameShift | R.INLRSTKL  | 0.997052 | 1  | TRUE  | 1 |
| chrV   | 104830   | 105964   | GeneBounc  | R.RRRWWF    | 1        | 3  | FALSE | 3 |

|        |          |          |            |             |          |   |       |   |
|--------|----------|----------|------------|-------------|----------|---|-------|---|
| chrX   | 9150637  | 9160597  | NovelExon  | R.FMPSSL    | 0.998173 | 1 | TRUE  | 1 |
| chrV   | 19646062 | 19647310 | NovelExon  | K.GGGGGT    | 0.995902 | 1 | TRUE  | 1 |
| chrI   | 4830136  | 4835872  | NovelExon  | K.QVILNLF   | 0.998261 | 1 | TRUE  | 1 |
| chrIV  | 2275877  | 2300351  | ReverseStr | L.EGLSPGG   | 0.999974 | 2 | TRUE  | 2 |
| chrIII | 10088667 | 10090708 | NovelExon  | R.KTKIKGE   | 0.998674 | 1 | TRUE  | 1 |
| chrII  | 12895569 | 12897393 | ExonBound  | K.DLNLVGE   | 0.99879  | 1 | TRUE  | 1 |
| chrX   | 4344227  | 4345626  | FrameShift | R.YQLINNV   | 0.994786 | 1 | TRUE  | 1 |
| chrIV  | 8775409  | 8778132  | NovelExon  | K.IAQSTNL   | 0.998025 | 1 | TRUE  | 1 |
| chrII  | 7525718  | 7528194  | ExonBound  | K.QDFKAC    | 0.99564  | 1 | TRUE  | 1 |
| chrIV  | 8261131  | 8266449  | FrameShift | K.PTMRTCC   | 1        | 8 | TRUE  | 4 |
| chrIII | 4752864  | 4754048  | ReverseStr | _.DISWVLN   | 1        | 4 | TRUE  | 4 |
| chrII  | 2460851  | 2472867  | ReverseStr | K.KFIDFCSE  | 0.999939 | 2 | FALSE | 2 |
| chrII  | 9331584  | 9333907  | ExonBound  | R.DKNEFIV   | 0.995146 | 1 | TRUE  | 1 |
| chrIV  | 11850905 | 11855136 | ReverseStr | S.FLGVLLK   | 0.999947 | 2 | TRUE  | 2 |
| chrIV  | 9978165  | 9980749  | GeneBound  | R.SSMYGLF   | 0.999975 | 2 | FALSE | 2 |
| chrX   | 5720407  | 5728623  | NovelExon  | R.KNERERE   | 0.997275 | 1 | TRUE  | 1 |
| chrX   | 15262658 | 15267912 | GeneBound  | K.KTILGNA   | 1        | 3 | FALSE | 3 |
| chrI   | 398894   | 412513   | ReverseStr | R.EKWRNFI   | 0.999963 | 2 | FALSE | 2 |
| chrI   | 12995796 | 13004366 | NovelExon  | R.NFTEKTK   | 0.994073 | 1 | TRUE  | 1 |
| chrX   | 15257528 | 15258979 | FrameShift | _.DLKPPDIF  | 0.998565 | 1 | TRUE  | 1 |
| chrII  | 508245   | 509326   | FrameShift | K.LVHNDFA   | 0.99945  | 1 | TRUE  | 1 |
| chrX   | 1837416  | 1839018  | ExonBound  | K.AFKMKG    | 0.999999 | 2 | TRUE  | 2 |
| chrIII | 2034967  | 2047997  | ReverseStr | R.IAEKHFF   | 0.999918 | 2 | TRUE  | 2 |
| chrV   | 14441126 | 14445325 | FrameShift | _.QNGNVQ    | 0.998479 | 1 | TRUE  | 1 |
| chrV   | 1794047  | 1799693  | NovelExon  | K.KFLISSK   | 0.996834 | 1 | TRUE  | 1 |
| chrIV  | 11814224 | 11819438 | FrameShift | M.SSMHFV    | 0.998185 | 1 | TRUE  | 1 |
| chrI   | 2915178  | 2918808  | GeneBound  | K.KLHPKLS   | 0.999978 | 2 | FALSE | 2 |
| chrIII | 845840   | 850324   | ReverseStr | K.FPIKTSSK  | 0.99995  | 2 | TRUE  | 2 |
| chrV   | 6417476  | 6424140  | FrameShift | R.VVDSIDG   | 0.995363 | 2 | TRUE  | 1 |
| chrII  | 3641503  | 3644085  | GeneBound  | R.SIYEQRAI  | 0.999989 | 3 | FALSE | 2 |
| chrII  | 11464860 | 11468589 | GeneBound  | K.LLFHQSK   | 0.999999 | 2 | FALSE | 2 |
| chrIV  | 1297224  | 1309644  | GeneBound  | R.RSSSDKLI  | 1        | 3 | FALSE | 3 |
| chrI   | 13958045 | 13960428 | GeneBound  | K.IMMMV     | 0.999965 | 2 | FALSE | 2 |
| chrI   | 7853745  | 7857829  | ExonBound  | K.DNLKVD    | 0.998397 | 1 | TRUE  | 1 |
| chrIV  | 14088014 | 14090120 | NovelGene  | N.IHEKKKEI  | 1        | 3 | FALSE | 3 |
| chrII  | 11336627 | 11337771 | FrameShift | R.WTTRTSF   | 0.996101 | 1 | TRUE  | 1 |
| chrIV  | 13009111 | 13035852 | Translated | K.IIVCGILKF | 0.999986 | 3 | TRUE  | 2 |
| chrII  | 8770920  | 8781966  | FrameShift | R.KEQNSRM   | 0.99779  | 1 | TRUE  | 1 |
| chrII  | 1818895  | 1820008  | GeneBound  | K.LSLHEVD   | 0.999984 | 2 | FALSE | 2 |
| chrV   | 15512161 | 15512755 | ExonBound  | R.AEKRFDL   | 0.996495 | 1 | TRUE  | 1 |
| chrV   | 1482051  | 1483053  | FrameShift | R.CSEGQTV   | 0.996614 | 1 | TRUE  | 1 |
| chrI   | 11851699 | 11868096 | NovelExon  | R.EIQKISYIL | 0.998695 | 1 | TRUE  | 1 |
| chrI   | 13527355 | 13527952 | FrameShift | K.IQIKNVE   | 0.999755 | 1 | TRUE  | 1 |
| chrIII | 5677908  | 5678988  | ReverseStr | R.KVVGCCS   | 1        | 3 | FALSE | 3 |
| chrV   | 16160665 | 16162204 | GeneBound  | K.QFGAIAIK  | 0.999941 | 2 | FALSE | 2 |
| chrX   | 13529018 | 13531977 | ReverseStr | K.KPPEAFR   | 0.999958 | 2 | TRUE  | 2 |
| chrII  | 8191722  | 8193278  | ReverseStr | K.YWVHKV    | 0.999968 | 2 | TRUE  | 2 |

|        |          |          |            |            |          |    |       |   |
|--------|----------|----------|------------|------------|----------|----|-------|---|
| chrIII | 2436095  | 2442318  | NovelExon  | _.TWISTKPI | 0.996046 | 1  | TRUE  | 1 |
| chrV   | 6633252  | 6639641  | FrameShift | K.CRISYWN  | 0.994884 | 1  | TRUE  | 1 |
| chrX   | 3382855  | 3385533  | NovelExon  | K.IMLKMY   | 0.99612  | 1  | TRUE  | 1 |
| chrI   | 4386788  | 4401981  | FrameShift | K.FPLSAEP  | 0.995329 | 1  | TRUE  | 1 |
| chrV   | 13340227 | 13343027 | FrameShift | K.AQDTVNI  | 0.994342 | 1  | TRUE  | 1 |
| chrV   | 1935162  | 1938212  | NovelGene  | R.RRVCSTG  | 0.999967 | 2  | FALSE | 2 |
| chrI   | 4229896  | 4236040  | NovelExon  | R.MSCASL   | 0.994406 | 1  | TRUE  | 1 |
| chrX   | 15628731 | 15630348 | ReverseStr | K.IQKWAN   | 0.99999  | 3  | TRUE  | 2 |
| chrV   | 13406903 | 13408172 | FrameShift | R.LVSIFWG  | 0.995904 | 1  | TRUE  | 1 |
| chrX   | 7272317  | 7280275  | ReverseStr | R.MWLVL    | 0.999977 | 2  | TRUE  | 2 |
| chrI   | 17483    | 26781    | NovelExon  | K.HNAV TIN | 0.99781  | 1  | TRUE  | 1 |
| chrII  | 2783107  | 2787094  | ReverseStr | _.KSLKKAR  | 0.999954 | 2  | TRUE  | 2 |
| chrII  | 8144745  | 8147190  | GeneBound  | _.IKNSHTQ  | 1        | 10 | FALSE | 4 |
| chrX   | 6449999  | 6450902  | FrameShift | _.LPIHSAK  | 0.995384 | 1  | TRUE  | 1 |
| chrI   | 9228156  | 9232090  | NovelExon  | R.VLYYTWT  | 0.998245 | 1  | TRUE  | 1 |
| chrX   | 1706365  | 1706633  | FrameShift | K.NLSV FVS | 0.997446 | 1  | TRUE  | 1 |
| chrV   | 728313   | 734280   | Translated | K.IMTTVGP  | 1        | 3  | TRUE  | 3 |
| chrV   | 8746136  | 8750171  | FrameShift | K.FMILSAY  | 0.995631 | 1  | TRUE  | 1 |
| chrX   | 11273206 | 11275418 | GeneBound  | R.TVNYEVII | 0.999999 | 2  | FALSE | 2 |
| chrV   | 17606324 | 17606896 | FrameShift | R.VVYVTIH  | 0.997872 | 1  | TRUE  | 1 |
| chrI   | 8853681  | 8861267  | ReverseStr | R.SSLDSTQ  | 0.999915 | 2  | TRUE  | 2 |
| chrV   | 19848295 | 19855288 | NovelExon  | R.NFFIEDFY | 0.996557 | 1  | TRUE  | 1 |
| chrI   | 3502741  | 3508408  | FrameShift | R.FFRKQFD  | 0.99842  | 1  | TRUE  | 1 |
| chrV   | 5536685  | 5537702  | GeneBound  | _.LQMMGS   | 0.999954 | 2  | FALSE | 2 |
| chrIV  | 5567043  | 5574100  | NovelExon  | _.TVFYGDL  | 0.998125 | 1  | TRUE  | 1 |
| chrII  | 7834020  | 7835092  | NovelExon  | R.FYFDLNI  | 0.997869 | 1  | TRUE  | 1 |
| chrIII | 7184286  | 7187803  | FrameShift | K.NKWMNI   | 0.996298 | 1  | TRUE  | 1 |
| chrII  | 11614572 | 11633545 | NovelExon  | R.SRAIAWF  | 1        | 1  | TRUE  | 1 |
| chrIII | 11512762 | 11523659 | ExonBound  | K.KIKYISSQ | 0.998772 | 1  | TRUE  | 1 |
| chrI   | 489987   | 496157   | ReverseStr | K.SESFFRN  | 0.999999 | 3  | TRUE  | 3 |
| chrI   | 11253342 | 11255875 | NovelExon  | K.NATREVR  | 0.997139 | 1  | TRUE  | 1 |
| chrX   | 16275696 | 16282375 | FrameShift | R.HEKGVSR  | 0.994467 | 1  | TRUE  | 1 |
| chrV   | 4879931  | 4881463  | FrameShift | R.FLCGCKG  | 0.99573  | 1  | TRUE  | 1 |
| chrIII | 11949806 | 11960084 | NovelExon  | K.VQKMCK   | 0.999905 | 2  | TRUE  | 2 |
| chrII  | 1026035  | 1033671  | NovelExon  | R.GKCQKKS  | 0.996038 | 1  | TRUE  | 1 |
| chrI   | 4137452  | 4138956  | ReverseStr | R.VEDIRDK  | 0.999977 | 2  | TRUE  | 2 |
| chrIII | 5993181  | 6006318  | NovelExon  | _.LTDFCGL  | 0.999844 | 1  | TRUE  | 1 |
| chrI   | 8592086  | 8592920  | GeneBound  | K.LTYSSKAI | 1        | 2  | FALSE | 2 |
| chrI   | 2876934  | 2878519  | FrameShift | K.IMQEKSP  | 0.996911 | 1  | TRUE  | 1 |
| chrI   | 112365   | 112915   | GeneBound  | R.IWRWQV   | 1        | 4  | FALSE | 2 |
| chrIII | 7208385  | 7209800  | ExonBound  | R.VEINYFA  | 0.994728 | 1  | TRUE  | 1 |
| chrIV  | 12374471 | 12376097 | FrameShift | R.MRKSM    | 0.995438 | 1  | TRUE  | 1 |
| chrIV  | 10885217 | 10885994 | FrameShift | R.SRYSCR   | 0.994558 | 1  | TRUE  | 1 |
| chrV   | 20094217 | 20095226 | ReverseStr | K.KFQIFFV  | 1        | 3  | TRUE  | 3 |
| chrI   | 10179835 | 10183987 | FrameShift | K.STLYPNA  | 0.994312 | 1  | TRUE  | 1 |
| chrI   | 6221247  | 6223117  | ReverseStr | _.SEWLASC  | 1        | 4  | FALSE | 4 |
| chrIV  | 11143324 | 11145997 | FrameShift | R.WRESSW   | 0.997754 | 1  | TRUE  | 1 |

|        |          |          |            |            |          |    |       |   |
|--------|----------|----------|------------|------------|----------|----|-------|---|
| chrIII | 12921428 | 12925898 | NovelExon  | R.NFATLRH  | 0.998987 | 1  | TRUE  | 1 |
| chrIII | 4084010  | 4086618  | ReverseStr | K.TIRKMGM  | 1        | 6  | TRUE  | 4 |
| chrIV  | 10328758 | 10348944 | ReverseStr | K.TPAMNN   | 0.999997 | 2  | TRUE  | 2 |
| chrIII | 9766430  | 9774721  | FrameShift | R.WTWWN    | 0.994221 | 1  | TRUE  | 1 |
| chrII  | 2839309  | 2840391  | GeneBound  | E.VNTNMA   | 0.999956 | 2  | FALSE | 2 |
| chrII  | 10694995 | 10702465 | FrameShift | K.ENKPSRG  | 0.999507 | 1  | TRUE  | 1 |
| chrX   | 8432641  | 8437296  | NovelExon  | K.GIGFLWN  | 0.996745 | 1  | TRUE  | 1 |
| chrII  | 2565280  | 2575937  | ReverseStr | K.FQFFREK  | 0.999961 | 2  | TRUE  | 2 |
| chrX   | 6853578  | 6860885  | NovelExon  | D.DRICLIGF | 0.996169 | 1  | TRUE  | 1 |
| chrV   | 6594177  | 6599189  | FrameShift | R.LAWKKQ   | 0.997642 | 1  | TRUE  | 1 |
| chrV   | 3955751  | 3957700  | FrameShift | R.HVPSESSI | 0.994262 | 1  | TRUE  | 1 |
| chrII  | 3052599  | 3054351  | ReverseStr | R.FIEGPARG | 0.999956 | 2  | TRUE  | 2 |
| chrV   | 9059728  | 9060459  | GeneBound  | K.HHYRFGC  | 0.999989 | 2  | FALSE | 2 |
| chrV   | 20879844 | 20898876 | ReverseStr | R.KNGKIGE  | 0.999996 | 2  | TRUE  | 2 |
| chrI   | 13724563 | 13731978 | ExonBound  | K.KSINFQFI | 0.996116 | 1  | TRUE  | 1 |
| chrV   | 20782441 | 20785227 | GeneBound  | R.FFGFAQE  | 0.999938 | 2  | FALSE | 2 |
| chrII  | 3038862  | 3040825  | FrameShift | R.NVPNFQI  | 0.998254 | 1  | TRUE  | 1 |
| chrIII | 5604418  | 5607511  | GeneBound  | R.SRNDLKD  | 0.999933 | 2  | FALSE | 2 |
| chrIV  | 10142140 | 10143079 | FrameShift | K.KSSRAGS  | 0.994138 | 1  | TRUE  | 1 |
| chrII  | 14581390 | 14582285 | ReverseStr | ._RHGQPPF  | 0.999995 | 2  | FALSE | 2 |
| chrX   | 12301522 | 12303225 | FrameShift | R.FQTPQPL  | 0.999923 | 2  | TRUE  | 2 |
| chrV   | 5324782  | 5328454  | ExonBound  | ._NSVGLDM  | 0.998084 | 1  | TRUE  | 1 |
| chrII  | 114429   | 121219   | ReverseStr | K.ECSGISLK | 0.999994 | 2  | TRUE  | 2 |
| chrII  | 14771887 | 14772913 | ReverseStr | K.FPENRHI  | 1        | 3  | TRUE  | 3 |
| chrIV  | 5678836  | 5682009  | NovelExon  | K.TLIKDGES | 0.996012 | 1  | TRUE  | 1 |
| chrIII | 2112404  | 2116887  | NovelExon  | ._NFWKKN   | 0.997491 | 1  | TRUE  | 1 |
| chrII  | 14778290 | 14782649 | ReverseStr | ._IPANCRF  | 0.999994 | 2  | TRUE  | 2 |
| chrII  | 8801035  | 8804827  | FrameShift | K.SLFKQPF  | 0.994542 | 1  | TRUE  | 1 |
| chrX   | 15811790 | 15814969 | ReverseStr | R.FLLRKEKS | 0.999924 | 2  | FALSE | 2 |
| chrIII | 8358553  | 8362373  | FrameShift | R.TFKKLECF | 0.994126 | 1  | TRUE  | 1 |
| chrX   | 2095364  | 2096052  | ReverseStr | ._FSKSASLE | 1        | 3  | TRUE  | 3 |
| chrIV  | 7189179  | 7190319  | FrameShift | K.EWLITM   | 0.999226 | 1  | TRUE  | 1 |
| chrII  | 12114902 | 12130904 | ReverseStr | R.FETFKRH  | 1        | 3  | FALSE | 3 |
| chrIII | 5626444  | 5632276  | NovelExon  | K.YDRVGA   | 0.999647 | 1  | TRUE  | 1 |
| chrI   | 8737130  | 8742558  | ExonBound  | K.KFQNHQ   | 0.996637 | 1  | TRUE  | 1 |
| chrIII | 12987571 | 12992391 | NovelExon  | K.NNVKNSI  | 0.995835 | 1  | TRUE  | 1 |
| chrI   | 3427179  | 3433095  | ExonBound  | R.KQEKLGF  | 0.996001 | 1  | TRUE  | 1 |
| chrV   | 8902317  | 8905401  | NovelExon  | K.DGNAVLF  | 0.995376 | 1  | TRUE  | 1 |
| chrII  | 8141161  | 8143345  | ReverseStr | ._EWSMLTI  | 1        | 10 | FALSE | 4 |
| chrX   | 8358739  | 8359481  | NovelGene  | K.MKSADS   | 0.999975 | 2  | FALSE | 2 |
| chrII  | 5937071  | 5940777  | ReverseStr | ._NLNGKNS  | 1        | 3  | FALSE | 3 |
| chrX   | 11638790 | 11641904 | NovelGene  | R.EFDSNLSI | 0.999998 | 2  | FALSE | 2 |
| chrV   | 15760429 | 15766157 | ReverseStr | K.KMFFGNI  | 1        | 2  | TRUE  | 2 |
| chrX   | 16140948 | 16146952 | ReverseStr | K.KVIGHKG  | 1        | 5  | TRUE  | 4 |
| chrIV  | 3222439  | 3252600  | NovelExon  | K.KRFMRKF  | 0.999974 | 2  | TRUE  | 2 |
| chrX   | 5340289  | 5341977  | ReverseStr | ._ATHLTQN  | 0.999987 | 3  | TRUE  | 2 |
| chrX   | 7727850  | 7733257  | FrameShift | ._IESSYDKE | 1        | 1  | TRUE  | 1 |

|        |          |          |            |            |          |    |       |    |
|--------|----------|----------|------------|------------|----------|----|-------|----|
| chrV   | 3704982  | 3712845  | FrameShift | R.KTRRRRR  | 0.998582 | 1  | TRUE  | 1  |
| chrI   | 12652305 | 12653213 | NovelExon  | R.VVDALGN  | 0.999821 | 1  | TRUE  | 1  |
| chrIV  | 2891555  | 2892495  | ReverseStr | W.AVTDGC   | 1        | 4  | FALSE | 3  |
| chrV   | 19020458 | 19024736 | GeneBound  | R.NFFFKFL  | 1        | 4  | FALSE | 4  |
| chrII  | 8207949  | 8209393  | ReverseStr | R.KMKIMEI  | 0.999995 | 2  | FALSE | 2  |
| chrI   | 3881831  | 3888456  | FrameShift | K.FLKMMM   | 0.99998  | 2  | TRUE  | 2  |
| chrX   | 16124080 | 16128794 | ReverseStr | K.KMYSTGC  | 1        | 5  | TRUE  | 4  |
| chrI   | 12652305 | 12653213 | ExonBound  | K.VKMPESF  | 0.998825 | 1  | TRUE  | 1  |
| chrIV  | 17476586 | 17479350 | GeneBound  | R.MPTVLA   | 1        | 3  | FALSE | 3  |
| chrI   | 9773161  | 9774007  | FrameShift | K.GPQQPL   | 0.999716 | 1  | TRUE  | 1  |
| chrIII | 2314425  | 2326890  | FrameShift | K.LQLMLLL  | 0.996951 | 1  | TRUE  | 1  |
| chrI   | 8591209  | 8591989  | ExonBound  | _.ISGLSDLY | 1        | 1  | TRUE  | 1  |
| chrIII | 706329   | 715818   | ReverseStr | _.KDATAPK  | 0.999985 | 2  | FALSE | 2  |
| chrI   | 10567883 | 10569008 | FrameShift | K.EGDKVGA  | 0.99772  | 2  | TRUE  | 1  |
| chrIV  | 10516741 | 10517731 | NovelGene  | R.TKMGEKI  | 0.999986 | 2  | FALSE | 2  |
| chrX   | 4885921  | 4889547  | ReverseStr | R.QNSLRQ   | 0.999988 | 2  | FALSE | 2  |
| chrV   | 19761021 | 19766739 | NovelExon  | K.MFLKLEN  | 0.995115 | 1  | TRUE  | 1  |
| chrX   | 8368487  | 8371557  | ReverseStr | K.KVCPKGR  | 0.999968 | 2  | FALSE | 2  |
| chrI   | 13849606 | 13850856 | ReverseStr | R.NELEVFK  | 0.999968 | 2  | TRUE  | 2  |
| chrIV  | 5864518  | 5865891  | ExonBound  | K.QNQNES'  | 0.999099 | 1  | TRUE  | 1  |
| chrIV  | 6910672  | 6912852  | FrameShift | R.HCIHLRTI | 0.995965 | 1  | TRUE  | 1  |
| chrIV  | 6742527  | 6747808  | NovelExon  | _.KFGRTMI  | 0.995098 | 1  | TRUE  | 1  |
| chrV   | 6211890  | 6217624  | ReverseStr | K.RTHTKKA  | 1        | 3  | TRUE  | 3  |
| chrIV  | 6536168  | 6538989  | FrameShift | R.WDYFPI   | 0.999512 | 1  | TRUE  | 1  |
| chrIII | 2473858  | 2486616  | FrameShift | K.RHRHVDI  | 0.995618 | 1  | TRUE  | 1  |
| chrIV  | 11439165 | 11447043 | ExonBound  | R.ETCYVVR  | 0.994835 | 1  | TRUE  | 1  |
| chrX   | 5106229  | 5107008  | ReverseStr | _.NQGVLPF  | 1        | 30 | FALSE | 23 |
| chrIV  | 1245399  | 1246872  | GeneBound  | K.TYHTIPR. | 0.999967 | 2  | FALSE | 2  |
| chrX   | 12619404 | 12623488 | ReverseStr | K.KIQKLDH  | 1        | 2  | TRUE  | 2  |
| chrIII | 12688172 | 12697445 | GeneBound  | _.FSVLNMF  | 0.999951 | 2  | FALSE | 2  |
| chrI   | 4231144  | 4236040  | FrameShift | R.SCSANST  | 0.998343 | 1  | TRUE  | 1  |
| chrI   | 10432812 | 10435867 | ReverseStr | _.CTAVSAS  | 0.999997 | 2  | TRUE  | 2  |
| chrIV  | 4086205  | 4102901  | NovelExon  | R.KISGYCSS | 0.999185 | 1  | TRUE  | 1  |
| chrV   | 9256841  | 9261101  | ReverseStr | K.RFRMRG   | 0.999961 | 2  | TRUE  | 2  |
| chrX   | 17483265 | 17486756 | FrameShift | R.STDIWRS  | 0.997987 | 1  | TRUE  | 1  |
| chrX   | 8893076  | 8898464  | FrameShift | K.EKNLSLT  | 0.999963 | 2  | TRUE  | 2  |
| chrIII | 5230531  | 5234568  | GeneBound  | R.FTQAGSE  | 1        | 8  | FALSE | 6  |
| chrV   | 6047989  | 6051244  | ReverseStr | R.RLLRRMV  | 0.999964 | 2  | TRUE  | 2  |
| chrIV  | 795379   | 796567   | ReverseStr | K.KNSKITP  | 0.999981 | 2  | FALSE | 2  |
| chrII  | 5215119  | 5225361  | NovelExon  | K.SWTENSE  | 0.994127 | 1  | TRUE  | 1  |
| chrII  | 8636208  | 8637661  | ReverseStr | K.MKMFDP   | 1        | 3  | FALSE | 3  |
| chrII  | 9991310  | 10000287 | ReverseStr | K.LTKDFGS  | 0.999997 | 2  | TRUE  | 2  |
| chrI   | 14241885 | 14244442 | GeneBound  | R.EKSIFLKI | 0.999932 | 2  | FALSE | 2  |
| chrV   | 15968402 | 15969733 | GeneBound  | R.KMFTFM   | 0.999925 | 2  | FALSE | 2  |
| chrI   | 368373   | 373448   | NovelExon  | R.FRRYGFV  | 0.996896 | 1  | TRUE  | 1  |
| chrIII | 3006842  | 3028694  | NovelExon  | K.NAGIFPA  | 0.997175 | 1  | TRUE  | 1  |
| chrI   | 302596   | 305461   | ReverseStr | S.QVDELLO  | 1        | 4  | TRUE  | 4  |

|        |          |          |            |             |          |   |       |   |
|--------|----------|----------|------------|-------------|----------|---|-------|---|
| chrIII | 254534   | 264395   | NovelExon  | K.YEKIAKIH  | 0.999174 | 1 | TRUE  | 1 |
| chrI   | 2072683  | 2076909  | GeneBounc  | _.GSDLLAG   | 1        | 5 | FALSE | 3 |
| chrV   | 19595174 | 19606090 | ReverseStr | _.FLVFESG   | 0.999965 | 2 | TRUE  | 2 |
| chrI   | 12317312 | 12318726 | FrameShift | N.DGVEIHS   | 0.995479 | 1 | TRUE  | 1 |
| chrIV  | 4454766  | 4454930  | ReverseStr | R.ERESGRM   | 0.999982 | 2 | FALSE | 2 |
| chrIII | 12673576 | 12686129 | NovelExon  | K.LEKMKKC   | 0.99947  | 1 | TRUE  | 1 |
| chrI   | 434327   | 434839   | NovelGene  | R.KKEMTLS   | 0.999995 | 2 | FALSE | 2 |
| chrIV  | 13888064 | 13892988 | ReverseStr | K.ERESARR   | 0.999981 | 2 | FALSE | 2 |
| chrIII | 9778237  | 9780233  | FrameShift | K.VITSKLI   | 0.999466 | 1 | TRUE  | 1 |
| chrIV  | 14843330 | 14845279 | GeneBounc  | K.SLNSTSLM  | 0.999981 | 2 | FALSE | 2 |
| chrV   | 16278171 | 16280594 | GeneBounc  | K.LCPSIQFM  | 0.999966 | 3 | FALSE | 2 |
| chrII  | 11739421 | 11743335 | FrameShift | _.GLAINGG   | 1        | 1 | TRUE  | 1 |
| chrX   | 15966041 | 15972229 | ReverseStr | R.EDRVGYM   | 0.999961 | 2 | TRUE  | 2 |
| chrX   | 2793928  | 2799235  | ReverseStr | R.KPLELVQ   | 0.999983 | 2 | TRUE  | 2 |
| chrV   | 10130443 | 10134125 | ReverseStr | R.SGVVNL    | 1        | 3 | TRUE  | 3 |
| chrV   | 5337168  | 5338997  | NovelExon  | K.KVEKNEN   | 0.994169 | 1 | TRUE  | 1 |
| chrX   | 17684420 | 17684853 | NovelGene  | K.WEGSYD'   | 0.999955 | 2 | FALSE | 2 |
| chrIV  | 13368500 | 13369396 | ExonBounc  | R.SYSDVSH   | 0.994355 | 1 | TRUE  | 1 |
| chrI   | 2071355  | 2072551  | GeneBounc  | _.GSDLLAG   | 0.999999 | 4 | FALSE | 2 |
| chrX   | 8017972  | 8025841  | NovelExon  | K.LGNRLKN   | 0.998571 | 1 | TRUE  | 1 |
| chrIV  | 14173585 | 14176448 | NovelExon  | K.NLNVTKR   | 0.99654  | 1 | TRUE  | 1 |
| chrI   | 7537724  | 7542153  | FrameShift | K.DHKNGRI   | 0.997387 | 1 | TRUE  | 1 |
| chrV   | 17601797 | 17602926 | FrameShift | R.RSKQKCC   | 0.996396 | 1 | TRUE  | 1 |
| chrIII | 12980992 | 12984322 | NovelExon  | _.VCHETFP   | 0.99779  | 1 | TRUE  | 1 |
| chrIV  | 3266200  | 3267672  | ReverseStr | E.SEYSTFVT  | 0.999961 | 2 | FALSE | 2 |
| chrX   | 10997909 | 10999212 | FrameShift | K.KVYSEFKI  | 0.995049 | 1 | TRUE  | 1 |
| chrI   | 3611945  | 3618321  | ReverseStr | _.LGTTVLL   | 1        | 3 | TRUE  | 3 |
| chrIII | 2134465  | 2151544  | FrameShift | K.IAEKSAEK  | 0.995024 | 1 | TRUE  | 1 |
| chrV   | 6039084  | 6040565  | FrameShift | R.RKEDMD    | 0.994672 | 1 | TRUE  | 1 |
| chrIII | 3729627  | 3735024  | ReverseStr | R.HNSSDYK   | 1        | 3 | TRUE  | 3 |
| chrII  | 14155205 | 14155611 | ExonBounc  | _.LLNCNPV   | 0.999991 | 2 | TRUE  | 2 |
| chrI   | 1686218  | 1693324  | ReverseStr | N.WEIIAVT   | 0.999996 | 2 | FALSE | 2 |
| chrV   | 17696164 | 17696822 | ReverseStr | R.LSDVSGA   | 1        | 3 | FALSE | 3 |
| chrI   | 14499715 | 14510542 | NovelExon  | K.KKLILCQK  | 0.998586 | 1 | TRUE  | 1 |
| chrI   | 12065938 | 12068651 | FrameShift | K.FPGDVLL   | 0.996709 | 1 | TRUE  | 1 |
| chrX   | 4961896  | 4964385  | FrameShift | R.TTGVVLD   | 1        | 4 | TRUE  | 3 |
| chrIV  | 12390240 | 12391372 | ReverseStr | _.VIWESRR   | 0.999975 | 3 | TRUE  | 2 |
| chrX   | 13926965 | 13929563 | ExonBounc  | K.IILGDAPK  | 0.994798 | 1 | TRUE  | 1 |
| chrII  | 4236504  | 4237752  | FrameShift | S.DSGSTIIM  | 0.995661 | 1 | TRUE  | 1 |
| chrIII | 11706869 | 11708720 | NovelExon  | K.AKILISPKI | 0.998367 | 1 | TRUE  | 1 |
| chrX   | 178242   | 179376   | GeneBounc  | R.FGNAIIEK  | 0.999936 | 2 | FALSE | 2 |
| chrX   | 4673780  | 4677397  | NovelExon  | L.LVSYHGA   | 0.994707 | 1 | TRUE  | 1 |
| chrIV  | 13170520 | 13173670 | FrameShift | K.HEVTVFT   | 0.996611 | 1 | TRUE  | 1 |
| chrI   | 4827073  | 4829797  | GeneBounc  | V.VLIVMEV   | 0.999991 | 2 | FALSE | 2 |
| chrII  | 4292784  | 4292936  | NovelGene  | K.TLHGVNF   | 1        | 2 | FALSE | 2 |
| chrII  | 1108848  | 1110999  | GeneBounc  | K.KKSKLNFI  | 0.99998  | 2 | FALSE | 2 |
| chrII  | 2035707  | 2039391  | ReverseStr | _.RDTQRA\   | 0.999987 | 2 | FALSE | 2 |



|        |          |          |             |            |          |   |       |   |
|--------|----------|----------|-------------|------------|----------|---|-------|---|
| chrV   | 1475086  | 1476768  | GeneBounc   | _.EGTDLFIK | 0.999982 | 2 | FALSE | 2 |
| chrX   | 14938182 | 14946249 | ReverseStr  | R.SPTESVVI | 0.999924 | 2 | TRUE  | 2 |
| chrII  | 1136808  | 1152712  | GeneBounc   | _.HDCYGEK  | 1        | 4 | FALSE | 4 |
| chrIV  | 8840712  | 8842792  | FrameShift  | K.DLEKSSM  | 0.99858  | 2 | TRUE  | 1 |
| chrIV  | 15710823 | 15722351 | NovelExon   | I.ILRKSQDN | 0.997626 | 1 | TRUE  | 1 |
| chrIII | 4406258  | 4407298  | FrameShift  | F.EGIRTGG' | 1        | 1 | TRUE  | 1 |
| chrV   | 4338898  | 4341296  | NovelExon   | R.LKLRFFQI | 0.99887  | 1 | TRUE  | 1 |
| chrIII | 12031423 | 12052205 | NovelExon   | K.KNFGAKS  | 0.996652 | 1 | TRUE  | 1 |
| chrIII | 7575208  | 7579344  | ReverseStr  | Q.YEDHVQ'  | 1        | 9 | FALSE | 4 |
| chrI   | 10074958 | 10077739 | ReverseStr  | R.ERRQQT/  | 0.999959 | 2 | FALSE | 2 |
| chrIII | 4248128  | 4263021  | FrameShift  | R.IDVAGFM  | 0.999558 | 1 | TRUE  | 1 |
| chrIII | 3070515  | 3085263  | FrameShift  | R.TRWKTW   | 1        | 2 | TRUE  | 2 |
| chrI   | 9744233  | 9745981  | GeneBounc   | K.FLLTFMTI | 0.999935 | 2 | FALSE | 2 |
| chrIII | 11949806 | 11960084 | NovelExon   | K.CAKNVKk  | 0.998714 | 1 | TRUE  | 1 |
| chrII  | 9329698  | 9331484  | GeneBounc   | K.LKMTECS  | 1        | 6 | FALSE | 6 |
| chrI   | 9108166  | 9110911  | ReverseStr  | E.DQAKRE/  | 0.999996 | 2 | TRUE  | 2 |
| chrII  | 2060135  | 2063849  | ReverseStr  | M.VKLMM'   | 1        | 4 | TRUE  | 4 |
| chrI   | 4920773  | 4926236  | ReverseStr  | R.NVGGGG   | 0.999972 | 2 | TRUE  | 2 |
| chrII  | 6951598  | 6955366  | ReverseStr  | K.LRCAGWI  | 1        | 2 | TRUE  | 2 |
| chrV   | 951588   | 964801   | GeneBounc   | R.QIADLPKI | 0.999968 | 2 | FALSE | 2 |
| chrIV  | 8492529  | 8494474  | GeneBounc   | _.NQNQLIK  | 0.999998 | 2 | FALSE | 2 |
| chrII  | 10584285 | 10587874 | GeneBounc   | K.EIMNGRk  | 0.999976 | 2 | FALSE | 2 |
| chrII  | 6944261  | 6947528  | ReverseStr  | R.KTPIWEK  | 0.999983 | 3 | TRUE  | 2 |
| chrIV  | 9844969  | 9846627  | ReverseStr  | _.ELQFHRII | 0.99999  | 3 | TRUE  | 2 |
| chrII  | 15183733 | 15185309 | GeneBounc   | _.RFAEFAG  | 0.999989 | 2 | FALSE | 2 |
| chrIV  | 10176661 | 10178077 | FrameShift  | _.LTGTLEGI | 0.996542 | 1 | TRUE  | 1 |
| chrIII | 6606197  | 6608060  | ExonBounc   | Y.QVALLGA  | 1        | 1 | TRUE  | 1 |
| chrI   | 444002   | 461610   | NovelExon   | R.WFCTSFS  | 0.996518 | 1 | TRUE  | 1 |
| chrX   | 4961896  | 4964385  | FrameShift  | _.MGCGINI  | 0.999994 | 2 | TRUE  | 2 |
| chrX   | 2853670  | 2857595  | GeneBounc   | R.APHMGV   | 0.999963 | 2 | FALSE | 2 |
| chrIII | 1419194  | 1419906  | TranslatedI | _.EDPTQP   | 0.999994 | 7 | TRUE  | 2 |
| chrIV  | 8783309  | 8785226  | ReverseStr  | R.RTLREND  | 0.999984 | 3 | FALSE | 2 |
| chrIII | 11057182 | 11061804 | ReverseStr  | R.NCLRSIQI | 1        | 3 | TRUE  | 2 |
| chrX   | 15929884 | 15939254 | FrameShift  | _.KFQLSHLI | 0.995864 | 1 | TRUE  | 1 |
| chrII  | 3036190  | 3037760  | ReverseStr  | R.NVPNFQI  | 0.99999  | 2 | TRUE  | 2 |
| chrII  | 13032783 | 13036435 | ReverseStr  | R.EIAGIEVS | 0.999991 | 2 | FALSE | 2 |
| chrII  | 14318082 | 14320963 | GeneBounc   | K.KTIIKIKD | 1        | 3 | FALSE | 3 |
| chrIV  | 186351   | 192149   | FrameShift  | _.FRRWIPC  | 0.999223 | 1 | TRUE  | 1 |
| chrIII | 5626444  | 5632276  | ReverseStr  | K.QKEQKK\  | 1        | 3 | TRUE  | 3 |
| chrIII | 8881846  | 8881885  | NovelGene   | R.GWNKIQ'  | 0.999981 | 2 | FALSE | 2 |
| chrIII | 8689861  | 8693392  | FrameShift  | _.LEILELMS | 0.998696 | 1 | TRUE  | 1 |
| chrX   | 5963366  | 5970132  | GeneBounc   | K.SSGKCGG  | 0.999975 | 2 | FALSE | 2 |
| chrIII | 8419136  | 8422578  | ReverseStr  | R.QCKGAEk  | 0.999958 | 2 | FALSE | 2 |
| chrIV  | 4386644  | 4388873  | ExonBounc   | K.GASVVV/  | 0.999662 | 1 | TRUE  | 1 |
| chrX   | 11163892 | 11175082 | NovelExon   | K.NTYAVSR  | 0.994945 | 1 | TRUE  | 1 |
| chrX   | 5061023  | 5062174  | FrameShift  | K.LEMSMS!  | 0.998153 | 1 | TRUE  | 1 |
| chrX   | 7009751  | 7012401  | NovelGene   | I.KTFLFPTD | 0.99993  | 2 | FALSE | 2 |

|        |          |          |            |            |          |   |       |   |
|--------|----------|----------|------------|------------|----------|---|-------|---|
| chrV   | 19908859 | 19915942 | ExonBound  | K.WMLTVE   | 0.995064 | 1 | TRUE  | 1 |
| chrI   | 2316309  | 2318307  | FrameShift | R.KVFGAAS  | 0.997416 | 1 | TRUE  | 1 |
| chrI   | 10299853 | 10300575 | GeneBound  | K.YVTENVA  | 1        | 3 | FALSE | 3 |
| chrII  | 14924347 | 14952867 | NovelExon  | K.TAKIGGG  | 0.994398 | 1 | TRUE  | 1 |
| chrV   | 16629879 | 16631134 | FrameShift | G.EDCKVVK  | 0.995802 | 1 | TRUE  | 1 |
| chrI   | 8664970  | 8666491  | GeneBound  | K.RKRLSMN  | 0.999974 | 2 | FALSE | 2 |
| chrI   | 348538   | 357235   | NovelExon  | K.LNKTRFLI | 0.998187 | 1 | TRUE  | 1 |
| chrV   | 16600546 | 16603348 | ReverseStr | K.YPGIGGIN | 0.999997 | 2 | TRUE  | 2 |
| chrII  | 12225294 | 12227227 | ExonBound  | K.KSRMVW   | 0.997652 | 1 | TRUE  | 1 |
| chrIV  | 14891432 | 14900621 | FrameShift | _.KQFSITDE | 0.995968 | 1 | TRUE  | 1 |
| chrIV  | 9770010  | 9770436  | FrameShift | L.RCFAFGQ  | 0.999581 | 1 | TRUE  | 1 |
| chrIII | 7700069  | 7709407  | ExonBound  | R.NCCVFE   | 0.998076 | 1 | TRUE  | 1 |
| chrV   | 13661249 | 13664224 | FrameShift | R.KFAMKVI  | 0.998774 | 1 | TRUE  | 1 |
| chrIII | 11388615 | 11393160 | NovelExon  | K.RTSTQGL  | 0.99434  | 1 | TRUE  | 1 |
| chrX   | 2593996  | 2606724  | ReverseStr | K.DRKKDSA  | 0.999997 | 2 | TRUE  | 2 |
| chrX   | 8557099  | 8563186  | FrameShift | K.MAGTAP   | 0.99439  | 1 | TRUE  | 1 |
| chrI   | 9355064  | 9357071  | NovelExon  | R.KLDGFSY  | 0.995318 | 1 | TRUE  | 1 |
| chrV   | 18478439 | 18480303 | GeneBound  | K.LLTDQTH  | 0.999935 | 2 | FALSE | 2 |
| chrX   | 6693696  | 6695711  | FrameShift | K.IGSTEIPV | 0.995199 | 1 | TRUE  | 1 |
| chrV   | 10315225 | 10317371 | ReverseStr | R.TSSIPTSK | 0.999977 | 2 | TRUE  | 2 |
| chrIV  | 858930   | 874529   | GeneBound  | R.LEGRRRR  | 0.999974 | 2 | FALSE | 2 |
| chrI   | 12859489 | 12861283 | ReverseStr | R.VGYPNISI | 0.999992 | 2 | TRUE  | 2 |
| chrII  | 9251728  | 9252966  | ReverseStr | R.IKDVEIPR | 0.999982 | 2 | TRUE  | 2 |
| chrII  | 1930195  | 1930752  | ReverseStr | K.AELKIKSY | 0.99998  | 2 | FALSE | 2 |
| chrV   | 859121   | 862060   | FrameShift | R.MMMGC    | 0.994286 | 1 | TRUE  | 1 |
| chrII  | 4038874  | 4043132  | FrameShift | _.MELRGS   | 0.994521 | 1 | TRUE  | 1 |
| chrIV  | 11146085 | 11147221 | FrameShift | _.FERSNNII | 0.997906 | 1 | TRUE  | 1 |
| chrI   | 14760637 | 14768969 | NovelExon  | K.QCNVYFS  | 0.996712 | 1 | TRUE  | 1 |
| chrX   | 15542944 | 15546255 | FrameShift | R.KAEEKAC  | 0.995379 | 1 | TRUE  | 1 |
| chrX   | 6173923  | 6175378  | ReverseStr | K.YGATRFS  | 0.999932 | 2 | FALSE | 2 |
| chrV   | 5505280  | 5509940  | ExonBound  | R.ALVVNLN  | 0.99898  | 1 | TRUE  | 1 |
| chrIV  | 9307314  | 9309086  | FrameShift | K.HVIPLALM | 0.995388 | 1 | TRUE  | 1 |
| chrIV  | 2091929  | 2099890  | ReverseStr | _.NKVINFD  | 1        | 4 | TRUE  | 3 |
| chrI   | 6105864  | 6107717  | FrameShift | _.KRGWFRI  | 0.999738 | 1 | TRUE  | 1 |
| chrIII | 8439394  | 8443535  | ReverseStr | R.SREMSVT  | 1        | 4 | FALSE | 4 |
| chrI   | 388510   | 394418   | ReverseStr | K.TCKFPFTI | 0.999996 | 2 | TRUE  | 2 |
| chrX   | 12989424 | 12991268 | FrameShift | R.EWRTSQ   | 0.996908 | 1 | TRUE  | 1 |
| chrIV  | 7218037  | 7219473  | ReverseStr | R.QEFLIK   | 1        | 3 | TRUE  | 3 |
| chrX   | 16988169 | 16988591 | NovelGene  | K.QKLKALS  | 0.999966 | 2 | FALSE | 2 |
| chrIII | 11257206 | 11270760 | ExonBound  | K.NENLKFF  | 0.997406 | 1 | TRUE  | 1 |
| chrIV  | 385894   | 386609   | NovelExon  | F.ENVVEVII | 1        | 1 | TRUE  | 1 |
| chrII  | 11365328 | 11370248 | FrameShift | R.VMRRLP   | 0.994921 | 1 | TRUE  | 1 |
| chrV   | 12498236 | 12503725 | GeneBound  | R.NFFGMQ   | 0.999993 | 2 | FALSE | 2 |
| chrII  | 10720172 | 10729193 | ReverseStr | K.FKENLKI  | 0.999945 | 2 | FALSE | 2 |
| chrIII | 8324613  | 8325537  | GeneBound  | L.AIDELLM  | 1        | 3 | FALSE | 3 |
| chrI   | 14241885 | 14244442 | NovelExon  | K.TKNASEK  | 0.995889 | 1 | TRUE  | 1 |
| chrIII | 10896289 | 10901739 | NovelExon  | R.KKCRNCP  | 0.998989 | 1 | TRUE  | 1 |

|        |          |          |            |             |          |   |       |   |
|--------|----------|----------|------------|-------------|----------|---|-------|---|
| chrIII | 6105695  | 6107459  | NovelGene  | R.QNYFLVC   | 0.999914 | 2 | FALSE | 2 |
| chrIII | 4508830  | 4512095  | FrameShift | R.RIMWSLL   | 0.998285 | 1 | TRUE  | 1 |
| chrIV  | 10310769 | 10313648 | FrameShift | K.MNNNEI    | 0.996285 | 1 | TRUE  | 1 |
| chrII  | 13670567 | 13694711 | ReverseStr | P.YGVVDRF   | 0.999989 | 3 | TRUE  | 2 |
| chrIV  | 7818239  | 7821149  | GeneBounc  | R.GFTPMG    | 0.999995 | 2 | FALSE | 2 |
| chrIII | 9745781  | 9746505  | ReverseStr | R.LCESGAA   | 1        | 2 | TRUE  | 2 |
| chrII  | 7531107  | 7533199  | GeneBounc  | K.QDFKAC    | 0.999965 | 2 | FALSE | 2 |
| chrIII | 12688172 | 12697445 | FrameShift | C.AAELLESE  | 0.995204 | 1 | TRUE  | 1 |
| chrII  | 6790004  | 6791740  | FrameShift | _.MITLKMk   | 0.996126 | 1 | TRUE  | 1 |
| chrII  | 13047871 | 13050733 | FrameShift | R.LEDLYKFI  | 0.996888 | 1 | TRUE  | 1 |
| chrI   | 11764294 | 11792109 | NovelExon  | K.GRKRPIG   | 0.995214 | 1 | TRUE  | 1 |
| chrII  | 3207686  | 3208754  | ReverseStr | D.INIDKTDI  | 0.999908 | 2 | TRUE  | 2 |
| chrII  | 10612961 | 10618276 | GeneBounc  | R.NCTFIKN'  | 0.999998 | 2 | FALSE | 2 |
| chrIV  | 5207099  | 5209463  | ReverseStr | _.MAPDFRI   | 0.999972 | 2 | TRUE  | 2 |
| chrII  | 11050202 | 11052269 | GeneBounc  | K.SLGIISTPI | 0.99992  | 2 | FALSE | 2 |
| chrIV  | 12211073 | 12215967 | ReverseStr | K.CTTNISLL  | 0.999983 | 2 | TRUE  | 2 |
| chrIII | 10808242 | 10810902 | GeneBounc  | R.NENDRTI   | 1        | 4 | FALSE | 4 |
| chrII  | 4753439  | 4755596  | FrameShift | K.LSKIDLSP  | 0.995131 | 1 | TRUE  | 1 |
| chrII  | 10841418 | 10843565 | NovelExon  | _.KPSKTDEI  | 0.999745 | 1 | TRUE  | 1 |
| chrIV  | 11576031 | 11578689 | NovelExon  | K.NGICGAK   | 0.995103 | 1 | TRUE  | 1 |
| chrIII | 1849036  | 1852893  | ReverseStr | R.KSDQMA    | 1        | 3 | TRUE  | 3 |
| chrII  | 11679033 | 11680971 | GeneBounc  | K.NTFSNKS   | 0.999967 | 2 | FALSE | 2 |
| chrIV  | 12361546 | 12370602 | GeneBounc  | R.NMLIWQ    | 0.999966 | 2 | FALSE | 2 |
| chrIV  | 4293613  | 4299076  | ReverseStr | _.TPQLSNS   | 0.999985 | 2 | TRUE  | 2 |
| chrV   | 9099759  | 9101111  | ReverseStr | V.EAQKEAC   | 0.999944 | 2 | TRUE  | 2 |
| chrX   | 13747379 | 13751709 | NovelExon  | _.FDAFGEP   | 0.994617 | 1 | TRUE  | 1 |
| chrI   | 1988726  | 2010482  | NovelExon  | K.AKILQKM   | 0.994586 | 1 | TRUE  | 1 |
| chrIII | 13060535 | 13062183 | NovelGene  | K.QDFLCLFI  | 0.999979 | 2 | FALSE | 2 |
| chrIV  | 10496404 | 10501579 | NovelExon  | R.SSPMAPF   | 0.997176 | 1 | TRUE  | 1 |
| chrIV  | 5747371  | 5757851  | NovelExon  | _.YLYKMPV   | 0.996171 | 1 | TRUE  | 1 |
| chrI   | 7055356  | 7056874  | ReverseStr | K.GQKTYQC   | 0.999974 | 3 | FALSE | 2 |
| chrI   | 9860494  | 9862394  | NovelExon  | R.NKTGEID   | 0.997014 | 1 | TRUE  | 1 |
| chrII  | 13448765 | 13460572 | NovelExon  | K.MTKNSAI   | 0.996856 | 1 | TRUE  | 1 |
| chrI   | 9874689  | 9879110  | NovelExon  | K.KSKKSCA   | 0.994242 | 1 | TRUE  | 1 |
| chrIII | 13344836 | 13346765 | GeneBounc  | R.INSEGTP   | 0.999971 | 2 | FALSE | 2 |
| chrII  | 12490150 | 12491751 | FrameShift | R.QEPPTTH   | 0.998612 | 1 | TRUE  | 1 |
| chrX   | 7600777  | 7606348  | NovelExon  | _.KRFGGVL   | 0.994509 | 1 | TRUE  | 1 |
| chrV   | 12107123 | 12109118 | FrameShift | R.CFLTLLQ   | 0.994055 | 1 | TRUE  | 1 |
| chrIV  | 5791285  | 5793446  | NovelExon  | _.RCQGRHI   | 0.998179 | 1 | TRUE  | 1 |
| chrV   | 3954024  | 3955445  | ReverseStr | R.NGLYQRC   | 0.999991 | 2 | FALSE | 2 |
| chrI   | 15041421 | 15050691 | NovelExon  | R.FKKLDILIF | 0.994688 | 1 | TRUE  | 1 |
| chrI   | 2907748  | 2924717  | ReverseStr | R.WGDHGF    | 1        | 4 | TRUE  | 4 |
| chrIII | 2197996  | 2206872  | ReverseStr | K.LSEVSRV   | 0.999995 | 2 | TRUE  | 2 |
| chrX   | 16332368 | 16345951 | GeneBounc  | R.ESSKSDRI  | 0.999969 | 2 | FALSE | 2 |
| chrV   | 10023535 | 10028135 | ExonBounc  | K.TAEHVEC   | 1        | 2 | TRUE  | 2 |
| chrIV  | 9625906  | 9634931  | FrameShift | K.SKTIFNIIF | 0.996221 | 1 | TRUE  | 1 |
| chrV   | 19670230 | 19671332 | ReverseStr | R.MFYDMK    | 1        | 3 | FALSE | 3 |

|        |          |          |             |            |          |   |       |   |
|--------|----------|----------|-------------|------------|----------|---|-------|---|
| chrI   | 10823347 | 10828443 | FrameShift  | R.WMWKH    | 0.994027 | 1 | TRUE  | 1 |
| chrIV  | 959452   | 984392   | ExonBounc   | K.FFLAKSRF | 0.997646 | 1 | TRUE  | 1 |
| chrIV  | 4050089  | 4050709  | ReverseStr: | K.GGQVSAI  | 1        | 3 | FALSE | 3 |
| chrII  | 8204290  | 8207522  | FrameShift  | R.VLTGDLA  | 0.998929 | 1 | TRUE  | 1 |
| chrIV  | 2084034  | 2091928  | GeneBounc   | _.VYALLNTI | 0.999994 | 3 | FALSE | 2 |
| chrX   | 5109473  | 5112347  | NovelExon   | R.FDVIFNV  | 0.997601 | 1 | TRUE  | 1 |
| chrI   | 12932026 | 12933740 | FrameShift  | K.LTDANIAI | 0.996656 | 1 | TRUE  | 1 |
| chrI   | 12535312 | 12537661 | FrameShift  | K.KCQGGG   | 0.994787 | 1 | TRUE  | 1 |
| chrI   | 14721752 | 14724728 | ReverseStr: | R.KNPVLNF  | 0.999967 | 2 | TRUE  | 2 |
| chrII  | 2557783  | 2563682  | ReverseStr: | R.NKRNRPF  | 1        | 3 | FALSE | 3 |
| chrIII | 1181994  | 1184930  | ReverseStr: | R.SSNGGKI  | 0.99998  | 2 | TRUE  | 2 |
| chrI   | 12474610 | 12475924 | FrameShift  | G.KYCITFIF | 0.998587 | 1 | TRUE  | 1 |
| chrX   | 10589718 | 10593274 | ReverseStr: | R.CSSRYRCI | 0.999995 | 4 | TRUE  | 2 |
| chrX   | 11778290 | 11780242 | NovelGene   | K.FQSLNNR  | 1        | 3 | FALSE | 3 |
| chrI   | 2071355  | 2072551  | FrameShift  | K.PRSSSKHI | 0.995879 | 1 | TRUE  | 1 |
| chrIV  | 3077470  | 3086920  | FrameShift  | K.FNSTWGI  | 0.994716 | 1 | TRUE  | 1 |
| chrI   | 9077559  | 9080017  | ReverseStr: | R.MTSGKTI  | 1        | 2 | TRUE  | 2 |
| chrI   | 14358512 | 14367577 | NovelExon   | R.NSNQKN   | 0.997327 | 1 | TRUE  | 1 |
| chrII  | 13402910 | 13404559 | GeneBounc   | K.RKKNEKK  | 1        | 4 | FALSE | 4 |
| chrX   | 13567371 | 13569886 | ReverseStr: | K.GLFLSSGI | 0.999984 | 2 | TRUE  | 2 |
| chrII  | 5014718  | 5015317  | ExonBounc   | _.FQASDAK  | 0.995391 | 1 | TRUE  | 1 |
| chrII  | 3972823  | 3974971  | ExonBounc   | _.FFPYFHYF | 0.994441 | 1 | TRUE  | 1 |
| chrV   | 5240754  | 5243120  | ReverseStr: | _.FRVEVVE  | 0.999952 | 2 | TRUE  | 2 |
| chrI   | 111038   | 112417   | FrameShift  | K.VQHHLFE  | 1        | 1 | TRUE  | 1 |
| chrIV  | 8395063  | 8395132  | NovelGene   | K.EFQNYPK  | 0.999994 | 2 | FALSE | 2 |
| chrIII | 13643817 | 13656684 | ReverseStr: | R.EGRAEAE  | 0.999979 | 2 | TRUE  | 2 |
| chrII  | 1612795  | 1614066  | ReverseStr: | R.MLNFLSC  | 0.999926 | 2 | FALSE | 2 |
| chrIV  | 1297224  | 1309644  | FrameShift  | R.RFLKWKS  | 0.996401 | 1 | TRUE  | 1 |
| chrX   | 17247600 | 17248898 | ReverseStr: | R.SSLESQN  | 0.999933 | 2 | FALSE | 2 |
| chrIII | 5833978  | 5835712  | ReverseStr: | K.SENVVVR  | 0.999932 | 2 | FALSE | 2 |
| chrII  | 6679511  | 6682937  | GeneBounc   | R.LLELAPTC | 1        | 5 | FALSE | 5 |
| chrIV  | 7926736  | 7927279  | ReverseStr: | R.GDLPHSL  | 1        | 4 | FALSE | 4 |
| chrIV  | 2594656  | 2596272  | GeneBounc   | L.MQQNAS   | 0.999953 | 2 | FALSE | 2 |
| chrIII | 11496739 | 11500618 | ReverseStr: | R.LIGHTVLI | 1        | 3 | TRUE  | 3 |
| chrV   | 18628652 | 18636145 | NovelExon   | K.ILFRAYLG | 0.99811  | 1 | TRUE  | 1 |
| chrIII | 9145248  | 9145899  | FrameShift  | _.NKACLLSI | 0.99456  | 1 | TRUE  | 1 |
| chrX   | 1794241  | 1795685  | ReverseStr: | R.EWATRE\  | 0.999999 | 4 | TRUE  | 2 |
| chrIV  | 17272194 | 17273615 | ReverseStr: | K.KISAHGTI | 1        | 3 | TRUE  | 3 |
| chrII  | 3381912  | 3384023  | ReverseStr: | R.DKQLELE  | 0.999964 | 2 | FALSE | 2 |
| chrX   | 1925744  | 1937683  | NovelExon   | R.GATQLRS  | 0.995611 | 1 | TRUE  | 1 |
| chrX   | 14284798 | 14293923 | ReverseStr: | K.VGREGSC  | 0.999994 | 3 | TRUE  | 2 |
| chrIV  | 13051353 | 13052125 | FrameShift  | _.RIPRMKN  | 0.997858 | 1 | TRUE  | 1 |
| chrX   | 8661224  | 8671701  | ExonBounc   | R.GHEKTM   | 0.996116 | 1 | TRUE  | 1 |
| chrX   | 6713538  | 6716355  | FrameShift  | K.SRSKAERI | 0.994174 | 1 | TRUE  | 1 |
| chrI   | 12773649 | 12782247 | FrameShift  | R.CKTSTRN  | 0.996715 | 1 | TRUE  | 1 |
| chrIV  | 5083322  | 5086859  | FrameShift  | R.TYAKNGK  | 1        | 1 | TRUE  | 1 |
| chrII  | 8457767  | 8464514  | FrameShift  | _.WEESKLS  | 0.996332 | 1 | TRUE  | 1 |

|        |          |          |             |            |          |   |       |   |
|--------|----------|----------|-------------|------------|----------|---|-------|---|
| chrV   | 9090055  | 9090582  | FrameShift  | K.INLDGHT  | 0.999815 | 1 | TRUE  | 1 |
| chrX   | 15852866 | 15860539 | FrameShift  | K.FCRLRGS  | 0.997078 | 1 | TRUE  | 1 |
| chrIV  | 2150650  | 2159162  | NovelExon   | K.FEIGGLEK | 0.99466  | 1 | TRUE  | 1 |
| chrIV  | 13300804 | 13303667 | ExonBounc   | K.KHAEAQI  | 0.998327 | 1 | TRUE  | 1 |
| chrI   | 111038   | 112417   | FrameShift  | _.GQIRGSA  | 0.999994 | 2 | TRUE  | 2 |
| chrX   | 4581571  | 4585638  | FrameShift  | _.KTGLYFSI | 0.996187 | 1 | TRUE  | 1 |
| chrII  | 13882633 | 13887964 | NovelExon   | R.KLKKKILK | 0.997039 | 1 | TRUE  | 1 |
| chrI   | 572180   | 575122   | ReverseStr: | R.QMPTIFF  | 0.999957 | 2 | TRUE  | 2 |
| chrI   | 6872596  | 6873754  | ReverseStr: | K.SDIWAFG  | 0.999974 | 2 | FALSE | 2 |
| chrX   | 9501561  | 9516378  | ReverseStr: | K.TLGISSTY | 0.999961 | 2 | TRUE  | 2 |
| chrV   | 12448662 | 12449985 | FrameShift  | R.DSRIVFDI | 0.996076 | 1 | TRUE  | 1 |
| chrX   | 11667092 | 11672203 | NovelExon   | K.TLFNSTFS | 0.999419 | 1 | TRUE  | 1 |
| chrX   | 2953492  | 2955529  | NovelGene   | K.CAIFVKTC | 1        | 3 | FALSE | 3 |
| chrIV  | 16550619 | 16553615 | NovelGene   | R.VLINSGAI | 1        | 3 | FALSE | 3 |
| chrIV  | 10473619 | 10475678 | GeneBounc   | R.SIYKFYSN | 0.999997 | 2 | FALSE | 2 |
| chrI   | 13214084 | 13216212 | FrameShift  | K.GKEKPTI  | 0.996216 | 1 | TRUE  | 1 |
| chrV   | 4794585  | 4797001  | NovelExon   | R.QFRQSGI  | 0.997829 | 1 | TRUE  | 1 |
| chrIII | 6309326  | 6320819  | FrameShift  | R.RHKQMV   | 0.99755  | 1 | TRUE  | 1 |
| chrI   | 11618    | 16842    | FrameShift  | K.SVETENA  | 0.99733  | 1 | TRUE  | 1 |
| chrII  | 11992944 | 11997946 | ReverseStr: | K.FFFDSKKI | 0.999962 | 2 | TRUE  | 2 |
| chrIV  | 13052943 | 13055130 | GeneBounc   | R.YPFQCSSI | 0.999997 | 2 | FALSE | 2 |
| chrIII | 1540483  | 1543412  | FrameShift  | _.KGSQQA   | 0.99449  | 1 | TRUE  | 1 |
| chrX   | 12843244 | 12845314 | GeneBounc   | K.RWMRKE   | 0.999955 | 2 | FALSE | 2 |
| chrIV  | 5458872  | 5460726  | FrameShift  | R.ATKCSPM  | 0.994455 | 1 | TRUE  | 1 |
| chrI   | 9874689  | 9879110  | NovelExon   | K.TTVKTITS | 0.996308 | 1 | TRUE  | 1 |
| chrIV  | 3111372  | 3133141  | NovelExon   | K.KKDEKKA  | 0.998527 | 1 | TRUE  | 1 |
| chrIV  | 7681414  | 7696911  | GeneBounc   | K.KDQKVNI  | 0.999978 | 2 | FALSE | 2 |
| chrX   | 12877410 | 12880255 | ReverseStr: | R.HQPNNNS' | 0.999984 | 2 | FALSE | 2 |
| chrIII | 1789138  | 1806612  | GeneBounc   | K.MQLFSDI  | 0.999982 | 2 | FALSE | 2 |
| chrIV  | 499897   | 502003   | NovelGene   | K.LLAKKST\ | 0.999936 | 2 | FALSE | 2 |
| chrX   | 6060722  | 6065951  | NovelExon   | K.KREGERK  | 0.994728 | 1 | TRUE  | 1 |
| chrX   | 256210   | 260110   | GeneBounc   | R.RRRWWF   | 1        | 3 | FALSE | 3 |
| chrI   | 12787933 | 12806571 | NovelExon   | R.KICHKLG  | 0.994255 | 1 | TRUE  | 1 |
| chrX   | 226651   | 227394   | GeneBounc   | K.NQNKRKI  | 1        | 2 | FALSE | 2 |
| chrIV  | 3032764  | 3050100  | FrameShift  | K.MIMIGRM  | 0.996386 | 1 | TRUE  | 1 |
| chrII  | 1769128  | 1771056  | FrameShift  | R.MKHGAL   | 0.995245 | 1 | TRUE  | 1 |
| chrX   | 5752190  | 5755183  | NovelGene   | K.KVYFAGK  | 0.999927 | 2 | FALSE | 2 |
| chrIII | 4796806  | 4802875  | GeneBounc   | L.CNRSETA  | 0.999969 | 2 | FALSE | 2 |
| chrIII | 7210011  | 7215049  | GeneBounc   | R.VEINYFA  | 0.999988 | 4 | FALSE | 2 |
| chrV   | 18784926 | 18786759 | NovelExon   | R.NIANMG'  | 0.99771  | 1 | TRUE  | 1 |
| chrII  | 2878915  | 2884900  | FrameShift  | R.HFGCGFS  | 0.997685 | 1 | TRUE  | 1 |
| chrII  | 8177526  | 8180329  | FrameShift  | R.TVMCYN'  | 0.996143 | 1 | TRUE  | 1 |
| chrIII | 8362337  | 8368763  | NovelExon   | K.ILCFNVDI | 0.996713 | 1 | TRUE  | 1 |
| chrIV  | 16312799 | 16313793 | NovelGene   | K.LLNPVVL  | 0.99993  | 2 | FALSE | 2 |
| chrIII | 5607466  | 5610304  | NovelExon   | R.IFSAGELR | 0.996232 | 1 | TRUE  | 1 |
| chrII  | 1771653  | 1774961  | GeneBounc   | _.LLKFEYCR | 0.999978 | 3 | FALSE | 2 |
| chrIV  | 8494537  | 8496352  | ReverseStr: | C.HYLKCLG  | 0.999993 | 2 | TRUE  | 2 |

|        |          |          |             |             |          |   |       |   |
|--------|----------|----------|-------------|-------------|----------|---|-------|---|
| chrIV  | 10615481 | 10620935 | NovelExon   | R.KYHMKQ    | 0.996279 | 1 | TRUE  | 1 |
| chrI   | 3888334  | 3891521  | ReverseStr  | K.FLKMMM    | 1        | 3 | FALSE | 3 |
| chrIV  | 930492   | 935699   | ExonBounc   | K.NIINPKFP  | 0.999377 | 1 | TRUE  | 1 |
| chrV   | 17176692 | 17178043 | ReverseStr  | R.YRYLYSSK  | 0.999955 | 2 | TRUE  | 2 |
| chrX   | 5298529  | 5306296  | FrameShift  | R.KMSMSV    | 0.996492 | 1 | TRUE  | 1 |
| chrI   | 10750949 | 10776028 | NovelExon   | R.VPLFMNI   | 0.995588 | 1 | TRUE  | 1 |
| chrX   | 15580532 | 15586748 | FrameShift  | R.KLDSGAN   | 0.998878 | 1 | TRUE  | 1 |
| chrIII | 3241707  | 3248570  | NovelExon   | R.KKIDGRR   | 0.998871 | 1 | TRUE  | 1 |
| chrV   | 3386488  | 3388153  | NovelExon   | R.LLTTRVLE  | 0.99589  | 1 | TRUE  | 1 |
| chrII  | 11126874 | 11127472 | GeneBounc   | _.SRYGVVD   | 0.999995 | 2 | FALSE | 2 |
| chrX   | 7066301  | 7068519  | ReverseStr  | R.LLQCPHH   | 0.99999  | 2 | TRUE  | 2 |
| chrIII | 9404420  | 9406557  | FrameShift  | K.RCNWSR    | 0.9992   | 1 | TRUE  | 1 |
| chrIV  | 15361562 | 15368228 | NovelExon   | K.SINWRG\   | 0.9974   | 1 | TRUE  | 1 |
| chrV   | 177580   | 184873   | ReverseStr  | R.KTEIMGC   | 0.999957 | 2 | FALSE | 2 |
| chrII  | 11481033 | 11481872 | NovelGene   | K.EKQHTRT   | 0.999992 | 2 | FALSE | 2 |
| chrX   | 3403457  | 3408591  | NovelSplice | _.TLNVNGC   | 1        | 2 | TRUE  | 2 |
| chrI   | 12587232 | 12591081 | GeneBounc   | K.GYAAPVC   | 0.999999 | 3 | FALSE | 3 |
| chrIII | 11611172 | 11612371 | ReverseStr  | K.KSIIVTKI  | 1        | 5 | TRUE  | 5 |
| chrIV  | 4490535  | 4495512  | NovelExon   | C.SKTACHC   | 0.998639 | 1 | TRUE  | 1 |
| chrIII | 5679253  | 5680142  | FrameShift  | R.KVVGCSS   | 0.999994 | 2 | TRUE  | 2 |
| chrII  | 13845583 | 13848751 | NovelGene   | K.INRQNNF   | 1        | 3 | FALSE | 3 |
| chrV   | 9628290  | 9629086  | ReverseStr  | _.WTQTNG    | 0.999974 | 2 | TRUE  | 2 |
| chrI   | 444002   | 461610   | NovelExon   | R.YCKNIENI  | 0.99533  | 1 | TRUE  | 1 |
| chrV   | 9135634  | 9137696  | FrameShift  | K.YVGNQSS   | 0.994296 | 1 | TRUE  | 1 |
| chrIV  | 12150934 | 12154220 | FrameShift  | K.IYPKILIII | 0.997398 | 1 | TRUE  | 1 |
| chrI   | 550711   | 556641   | FrameShift  | R.RDLGNVF   | 0.996822 | 1 | TRUE  | 1 |
| chrI   | 3502741  | 3508427  | NovelExon   | R.FFRKQFD   | 0.99842  | 1 | TRUE  | 1 |
| chrV   | 18533926 | 18549077 | FrameShift  | _.QFPSQR    | 0.999063 | 1 | TRUE  | 1 |
| chrII  | 14434477 | 14437896 | NovelExon   | K.NVSMEM    | 0.997827 | 1 | TRUE  | 1 |
| chrV   | 11201887 | 11216758 | ReverseStr  | R.MMIQVT    | 0.999987 | 2 | TRUE  | 2 |
| chrI   | 17483    | 26781    | NovelExon   | R.QRWOLF    | 0.996871 | 1 | TRUE  | 1 |
| chrII  | 14133322 | 14142122 | NovelExon   | R.QISGMKI   | 0.997114 | 1 | TRUE  | 1 |
| chrIII | 13604238 | 13605967 | ReverseStr  | L.AMEEEIA   | 0.999997 | 2 | TRUE  | 2 |
| chrIII | 1951517  | 1952019  | GeneBounc   | _.FQVKTSR   | 1        | 4 | FALSE | 4 |
| chrV   | 7009743  | 7012226  | FrameShift  | K.MRKRRR    | 0.999986 | 2 | TRUE  | 2 |
| chrX   | 8720170  | 8720706  | FrameShift  | R.SKWSTNS   | 0.998329 | 1 | TRUE  | 1 |
| chrI   | 13861456 | 13887641 | NovelExon   | K.NKENYW    | 0.999251 | 1 | TRUE  | 1 |
| chrII  | 4155775  | 4167370  | ReverseStr  | K.YRHSANS   | 0.999978 | 2 | TRUE  | 2 |
| chrIV  | 6524597  | 6526485  | FrameShift  | K.ILMKITKC  | 0.995099 | 1 | TRUE  | 1 |
| chrX   | 14747251 | 14750321 | ExonBounc   | R.NEIVFQV   | 0.994901 | 1 | TRUE  | 1 |
| chrI   | 101213   | 108161   | FrameShift  | R.EKEKASA   | 0.998034 | 1 | TRUE  | 1 |
| chrI   | 9280954  | 9286569  | NovelExon   | K.LKKKILKI  | 0.996173 | 1 | TRUE  | 1 |
| chrIV  | 11521266 | 11522193 | FrameShift  | R.RSDQVDI   | 0.99612  | 1 | TRUE  | 1 |
| chrI   | 2707601  | 2717551  | NovelExon   | R.ICISKGGM  | 0.999142 | 1 | TRUE  | 1 |
| chrIV  | 3088425  | 3088509  | NovelGene   | K.SQPKPKP   | 0.999989 | 2 | FALSE | 2 |
| chrX   | 12731780 | 12737362 | FrameShift  | K.KSIKLWN   | 0.995245 | 1 | TRUE  | 1 |
| chrI   | 496208   | 502046   | ReverseStr  | S.HYGLIYK   | 0.999997 | 4 | FALSE | 2 |

|      |          |          |             |            |          |   |       |   |
|------|----------|----------|-------------|------------|----------|---|-------|---|
| chrV | 17968565 | 17980055 | NovelExon   | K.VFEICNK\ | 0.998601 | 1 | TRUE  | 1 |
| chrV | 16854624 | 16856130 | ReverseStr: | R.RGKFRRV  | 0.999955 | 2 | FALSE | 2 |
| chrI | 2382967  | 2401490  | ReverseStr: | R.FCKKQRF  | 0.999923 | 2 | TRUE  | 2 |
