# Supplementary material
Source: PubMed Central journal article supplement (PMC4034692)
Supplement: NIHMS506026-supplement-3_si_002.pdf [file NIHMS506026-supplement-3_si_002.pdf]

| #SpecFile | Scan# | Precursor | PMError(p | Charge | Peptide      | Protein    | SpecProb | FDR      |
|-----------|-------|-----------|-----------|--------|--------------|------------|----------|----------|
| 06June201 | 4934  | 910.07    | -22.1857  |        | 3 R.NCCVVFE  | chr3@7702  | 8.73E-11 | 0.001924 |
| 06June201 | 3775  | 558.3     | -2.40945  |        | 2 R.LEIDSSNI | Splice@chr | 3.95E-11 | 5.73E-04 |
| 06June201 | 5015  | 558.3     | -2.40945  |        | 2 R.LEIDSSNI | Splice@chr | 6.04E-12 | 7.12E-04 |
| 06June201 | 2602  | 664.7     | 1.197202  |        | 3 _PTLNK+1.  | chr1@6526  | 1.07E-11 | 0        |
| 06June201 | 2621  | 664.7     | 1.197202  |        | 3 _PTLNK+1.  | chr1@6526  | 4.67E-12 | 0        |
| 06June201 | 2645  | 664.37    | 7.851479  |        | 3 _PTLNK+1.  | chr1@6526  | 2.29E-10 | 0.005882 |
| 06June201 | 3305  | 664.7     | 1.197202  |        | 3 _PTLNK+1.  | chr1@6526  | 2.01E-11 | 0        |
| 06June201 | 3396  | 664.7     | 1.197202  |        | 3 _PTLNK+1.  | chr1@6526  | 6.89E-10 | 0.007553 |
| 06June201 | 3259  | 664.7     | 1.197202  |        | 3 _PTLNK+1.  | chr1@6526  | 4.69E-11 | 0        |
| 06June201 | 3280  | 664.7     | 1.197202  |        | 3 _PTLNK+1.  | chr1@6526  | 4.22E-11 | 0        |
| 06June201 | 3356  | 664.7     | 1.197202  |        | 3 _PTLNK+1.  | chr1@6526  | 1.87E-11 | 0        |
| 06June201 | 3332  | 664.7     | 1.197202  |        | 3 _PTLNK+1.  | chr1@6526  | 2.28E-11 | 0        |
| 06June201 | 6839  | 664.7     | 1.197202  |        | 3 _PTLNK+1.  | chr1@6526  | 1.11E-10 | 0.002674 |
| 06June201 | 6967  | 664.7     | 1.197202  |        | 3 _PTLNK+1.  | chr1@6526  | 3.38E-10 | 0.007259 |
| 06June201 | 6995  | 664.7     | 1.197202  |        | 3 _PTLNK+1.  | chr1@6526  | 2.19E-10 | 0.005211 |
| 06June201 | 6807  | 664.7     | 1.197202  |        | 3 _PTLNK+1.  | chr1@6526  | 5.03E-11 | 9.25E-04 |
| 06June201 | 6877  | 664.7     | 1.197202  |        | 3 _PTLNK+1.  | chr1@6526  | 1.71E-11 | 4.95E-04 |
| 06June201 | 7027  | 664.7     | 1.197202  |        | 3 _PTLNK+1.  | chr1@6526  | 3.51E-10 | 0.007973 |
| 06June201 | 6908  | 664.7     | 1.197202  |        | 3 _PTLNK+1.  | chr1@6526  | 7.12E-12 | 0        |
| 06June201 | 2737  | 664.7     | 1.197202  |        | 3 _PTLNK+1.  | chr1@6526  | 1.07E-11 | 0        |
| 06June201 | 2751  | 664.7     | 1.197202  |        | 3 _PTLNK+1.  | chr1@6526  | 5.28E-11 | 0        |
| 06June201 | 2646  | 664.7     | 1.197202  |        | 3 _PTLNK+1.  | chr1@6526  | 4.25E-11 | 0        |
| 06June201 | 2633  | 664.7     | 1.197202  |        | 3 _PTLNK+1.  | chr1@6526  | 1.11E-11 | 0        |
| 06June201 | 3252  | 664.7     | 1.197202  |        | 3 _PTLNK+1.  | chr1@6526  | 8.43E-11 | 0.001637 |
| 06June201 | 3274  | 664.7     | 1.197202  |        | 3 _PTLNK+1.  | chr1@6526  | 1.75E-10 | 0.006289 |
| 06June201 | 3230  | 664.7     | 1.197202  |        | 3 _PTLNK+1.  | chr1@6526  | 2.32E-10 | 0.007622 |
| 06June201 | 3311  | 664.7     | 1.197202  |        | 3 _PTLNK+1.  | chr1@6526  | 8.26E-11 | 0.001637 |
| 06June201 | 8586  | 664.7     | 1.197202  |        | 3 _PTLNK+1.  | chr1@6526  | 6.13E-11 | 0.001114 |
| 06June201 | 8542  | 664.7     | 1.197202  |        | 3 _PTLNK+1.  | chr1@6526  | 3.45E-12 | 0        |
| 06June201 | 8780  | 664.7     | 1.197202  |        | 3 _PTLNK+1.  | chr1@6526  | 4.98E-11 | 8.41E-04 |
| 06June201 | 8501  | 664.7     | 1.197202  |        | 3 _PTLNK+1.  | chr1@6526  | 2.75E-11 | 2.90E-04 |
| 06June201 | 8624  | 664.7     | 1.197202  |        | 3 _PTLNK+1.  | chr1@6526  | 2.43E-11 | 2.90E-04 |
| 06June201 | 8663  | 664.7     | 1.197202  |        | 3 _PTLNK+1.  | chr1@6526  | 3.36E-11 | 2.90E-04 |
| 06June201 | 3675  | 664.7     | 1.197202  |        | 3 _PTLNK+1.  | chr1@6526  | 4.11E-11 | 0.002789 |
| 06June201 | 3838  | 664.7     | 1.197202  |        | 3 _PTLNK+1.  | chr1@6526  | 2.65E-10 | 0.007634 |
| 06June201 | 3813  | 664.7     | 1.197202  |        | 3 _PTLNK+1.  | chr1@6526  | 1.07E-10 | 0.003989 |
| 06June201 | 3723  | 664.7     | 1.197202  |        | 3 _PTLNK+1.  | chr1@6526  | 5.34E-11 | 0.003989 |
| 06June201 | 3747  | 664.7     | 1.197202  |        | 3 _PTLNK+1.  | chr1@6526  | 6.25E-11 | 0.003989 |
| 06June201 | 3695  | 664.7     | 1.197202  |        | 3 _PTLNK+1.  | chr1@6526  | 2.05E-10 | 0.007634 |
| 06June201 | 3775  | 664.37    | 7.851479  |        | 3 _PTLNK+1.  | chr1@6526  | 6.97E-11 | 0.003989 |
| 06June201 | 3792  | 664.7     | 1.197202  |        | 3 _PTLNK+1.  | chr1@6526  | 3.91E-10 | 0.008816 |
| 06June201 | 2757  | 664.37    | 7.851479  |        | 3 _PTLNK+1.  | chr1@6526  | 1.13E-10 | 0        |
| 06June201 | 2736  | 664.7     | 1.197202  |        | 3 _PTLNK+1.  | chr1@6526  | 3.64E-12 | 0        |
| 06June201 | 7304  | 664.7     | 1.197202  |        | 3 _PTLNK+1.  | chr1@6526  | 2.32E-10 | 0.004378 |
| 06June201 | 7118  | 664.7     | 1.197202  |        | 3 _PTLNK+1.  | chr1@6526  | 6.53E-13 | 0        |
| 06June201 | 7156  | 664.7     | 1.197202  |        | 3 _PTLNK+1.  | chr1@6526  | 9.26E-11 | 0.001924 |

|           |      |        |          |                       |          |          |
|-----------|------|--------|----------|-----------------------|----------|----------|
| 06June201 | 9539 | 664.7  | 1.197202 | 3 _PTLNK+1. chr1@6526 | 2.77E-11 | 0.001018 |
| 06June201 | 9581 | 664.7  | 1.197202 | 3 _PTLNK+1. chr1@6526 | 6.69E-11 | 0.002657 |
| 06June201 | 9498 | 664.7  | 1.197202 | 3 _PTLNK+1. chr1@6526 | 1.41E-10 | 0.004671 |
| 06June201 | 7504 | 664.7  | 1.197202 | 3 _PTLNK+1. chr1@6526 | 1.17E-12 | 0        |
| 06June201 | 7548 | 664.7  | 1.197202 | 3 _PTLNK+1. chr1@6526 | 2.94E-11 | 0        |
| 06June201 | 7586 | 664.7  | 1.197202 | 3 _PTLNK+1. chr1@6526 | 6.97E-11 | 7.67E-04 |
| 06June201 | 3191 | 664.7  | 1.197202 | 3 _PTLNK+1. chr1@6526 | 7.54E-12 | 0        |
| 06June201 | 3006 | 664.7  | 1.197202 | 3 _PTLNK+1. chr1@6526 | 8.18E-12 | 0        |
| 06June201 | 2979 | 664.7  | 1.197202 | 3 _PTLNK+1. chr1@6526 | 5.16E-12 | 0        |
| 06June201 | 2951 | 664.7  | 1.197202 | 3 _PTLNK+1. chr1@6526 | 1.57E-11 | 0        |
| 06June201 | 3083 | 664.7  | 1.197202 | 3 _PTLNK+1. chr1@6526 | 7.48E-11 | 0        |
| 06June201 | 2775 | 664.7  | 1.197202 | 3 _PTLNK+1. chr1@6526 | 2.13E-11 | 0.002353 |
| 06June201 | 2799 | 664.7  | 1.197202 | 3 _PTLNK+1. chr1@6526 | 1.55E-11 | 0.002353 |
| 06June201 | 2755 | 664.7  | 1.197202 | 3 _PTLNK+1. chr1@6526 | 5.08E-11 | 0.002353 |
| 06June201 | 3227 | 664.7  | 1.197202 | 3 _PTLNK+1. chr1@6526 | 1.66E-10 | 0.005556 |
| 06June201 | 3208 | 664.7  | 1.197202 | 3 _PTLNK+1. chr1@6526 | 2.56E-12 | 0        |
| 06June201 | 3132 | 664.7  | 1.197202 | 3 _PTLNK+1. chr1@6526 | 1.50E-11 | 0        |
| 06June201 | 3157 | 664.7  | 1.197202 | 3 _PTLNK+1. chr1@6526 | 1.80E-12 | 0        |
| 06June201 | 3118 | 664.7  | 1.197202 | 3 _PTLNK+1. chr1@6526 | 5.39E-11 | 0        |
| 06June201 | 7737 | 664.7  | 1.197202 | 3 _PTLNK+1. chr1@6526 | 1.84E-11 | 0        |
| 06June201 | 7694 | 664.7  | 1.197202 | 3 _PTLNK+1. chr1@6526 | 1.02E-11 | 0        |
| 06June201 | 7934 | 664.7  | 1.197202 | 3 _PTLNK+1. chr1@6526 | 2.19E-10 | 0.002584 |
| 06June201 | 7895 | 664.7  | 1.197202 | 3 _PTLNK+1. chr1@6526 | 2.27E-10 | 0.002584 |
| 06June201 | 7782 | 664.7  | 1.197202 | 3 _PTLNK+1. chr1@6526 | 3.26E-12 | 0        |
| 06June201 | 7808 | 664.7  | 1.197202 | 3 _PTLNK+1. chr1@6526 | 4.60E-12 | 0        |
| 06June201 | 7950 | 664.37 | 7.851479 | 3 _PTLNK+1. chr1@6526 | 6.61E-10 | 0.009595 |
| 06June201 | 7915 | 664.7  | 1.197202 | 3 _PTLNK+1. chr1@6526 | 5.77E-10 | 0.008685 |
| 06June201 | 7774 | 664.7  | 1.197202 | 3 _PTLNK+1. chr1@6526 | 2.07E-13 | 0        |
| 06June201 | 7737 | 664.7  | 1.197202 | 3 _PTLNK+1. chr1@6526 | 2.76E-10 | 0.006107 |
| 06June201 | 2679 | 664.7  | 1.197202 | 3 _PTLNK+1. chr1@6526 | 3.06E-12 | 0        |
| 06June201 | 2660 | 664.7  | 1.197202 | 3 _PTLNK+1. chr1@6526 | 7.71E-11 | 0.002415 |
| 06June201 | 2643 | 664.7  | 1.197202 | 3 _PTLNK+1. chr1@6526 | 5.04E-11 | 0.002415 |
| 06June201 | 3088 | 664.7  | 1.197202 | 3 _PTLNK+1. chr1@6526 | 5.18E-11 | 0.005415 |
| 06June201 | 3143 | 664.7  | 1.197202 | 3 _PTLNK+1. chr1@6526 | 5.31E-11 | 0.005415 |
| 06June201 | 3043 | 664.7  | 1.197202 | 3 _PTLNK+1. chr1@6526 | 1.21E-11 | 0        |
| 06June201 | 3065 | 664.7  | 1.197202 | 3 _PTLNK+1. chr1@6526 | 6.72E-12 | 0        |
| 06June201 | 3078 | 664.7  | 1.197202 | 3 _PTLNK+1. chr1@6526 | 3.36E-11 | 0        |
| 06June201 | 3118 | 664.7  | 1.197202 | 3 _PTLNK+1. chr1@6526 | 2.54E-11 | 0        |
| 06June201 | 3097 | 664.7  | 1.197202 | 3 _PTLNK+1. chr1@6526 | 4.39E-12 | 0        |
| 06June201 | 3141 | 664.7  | 1.197202 | 3 _PTLNK+1. chr1@6526 | 1.74E-10 | 0.001689 |
| 06June201 | 2841 | 664.7  | 1.197202 | 3 _PTLNK+1. chr1@6526 | 5.00E-11 | 0.00463  |
| 06June201 | 2892 | 664.7  | 1.197202 | 3 _PTLNK+1. chr1@6526 | 3.30E-10 | 0.008639 |
| 06June201 | 2820 | 664.7  | 1.197202 | 3 _PTLNK+1. chr1@6526 | 9.09E-12 | 0.002445 |
| 06June201 | 2807 | 664.7  | 1.197202 | 3 _PTLNK+1. chr1@6526 | 4.17E-11 | 0.00463  |
| 06June201 | 3051 | 664.7  | 1.197202 | 3 _PTLNK+1. chr1@6526 | 3.56E-12 | 0        |
| 06June201 | 3070 | 664.7  | 1.197202 | 3 _PTLNK+1. chr1@6526 | 2.49E-11 | 0        |
| 06June201 | 3085 | 664.37 | 7.851479 | 3 _PTLNK+1. chr1@6526 | 2.54E-11 | 0        |

|           |       |         |          |                         |          |          |
|-----------|-------|---------|----------|-------------------------|----------|----------|
| 06June201 | 3106  | 664.7   | 1.197202 | 3 _PTLNK+1. chr1@6526   | 9.90E-11 | 0.006944 |
| 06June201 | 2830  | 664.7   | 1.197202 | 3 _PTLNK+1. chr1@6526   | 1.44E-11 | 0        |
| 06June201 | 2786  | 664.7   | 1.197202 | 3 _PTLNK+1. chr1@6526   | 7.94E-13 | 0        |
| 06June201 | 2892  | 664.7   | 1.197202 | 3 _PTLNK+1. chr1@6526   | 5.75E-11 | 0.001736 |
| 06June201 | 2876  | 664.37  | 7.851479 | 3 _PTLNK+1. chr1@6526   | 7.66E-10 | 0.009693 |
| 06June201 | 2809  | 664.7   | 1.197202 | 3 _PTLNK+1. chr1@6526   | 1.85E-11 | 0        |
| 06June201 | 3483  | 664.7   | 1.197202 | 3 _PTLNK+1. chr1@6526   | 1.29E-11 | 0        |
| 06June201 | 3565  | 664.7   | 1.197202 | 3 _PTLNK+1. chr1@6526   | 7.75E-10 | 0.009615 |
| 06June201 | 3579  | 664.7   | 1.197202 | 3 _PTLNK+1. chr1@6526   | 5.32E-11 | 0.002041 |
| 06June201 | 3507  | 664.7   | 1.197202 | 3 _PTLNK+1. chr1@6526   | 5.56E-10 | 0.005859 |
| 06June201 | 3467  | 664.7   | 1.197202 | 3 _PTLNK+1. chr1@6526   | 2.06E-10 | 0.002041 |
| 06June201 | 2964  | 664.7   | 1.197202 | 3 _PTLNK+1. chr1@6526   | 8.89E-12 | 0        |
| 06June201 | 2837  | 664.7   | 1.197202 | 3 _PTLNK+1. chr1@6526   | 4.13E-11 | 0.003257 |
| 06June201 | 2803  | 664.7   | 1.197202 | 3 _PTLNK+1. chr1@6526   | 3.42E-11 | 0        |
| 06June201 | 2816  | 664.7   | 1.197202 | 3 _PTLNK+1. chr1@6526   | 1.19E-10 | 0.004    |
| 06June201 | 2828  | 664.7   | 1.197202 | 3 _PTLNK+1. chr1@6526   | 4.41E-12 | 0        |
| 06June201 | 2653  | 664.7   | 1.197202 | 3 _PTLNK+1. chr1@6526   | 2.28E-11 | 0        |
| 06June201 | 2664  | 664.7   | 1.197202 | 3 _PTLNK+1. chr1@6526   | 5.06E-12 | 0        |
| 06June201 | 3124  | 664.7   | 1.197202 | 3 _PTLNK+1. chr1@6526   | 2.28E-10 | 0.004717 |
| 06June201 | 3045  | 664.7   | 1.197202 | 3 _PTLNK+1. chr1@6526   | 2.53E-10 | 0.004717 |
| 06June201 | 2996  | 664.7   | 1.197202 | 3 _PTLNK+1. chr1@6526   | 3.33E-11 | 0.001357 |
| 06June201 | 3020  | 664.7   | 1.197202 | 3 _PTLNK+1. chr1@6526   | 6.28E-11 | 0.003584 |
| 06June201 | 2898  | 664.7   | 1.197202 | 3 _PTLNK+1. chr1@6526   | 2.43E-12 | 0        |
| 06June201 | 2888  | 664.7   | 1.197202 | 3 _PTLNK+1. chr1@6526   | 1.43E-11 | 0        |
| 06June201 | 2911  | 664.7   | 1.197202 | 3 _PTLNK+1. chr1@6526   | 2.10E-12 | 0        |
| 07Apr2011 | 14759 | 634.84  | 6.410455 | 2 R.VDIGDILF Splice@chr | 6.37E-13 | 0        |
| 07Apr2011 | 14797 | 634.83  | -9.39461 | 2 R.VDIGDILF Splice@chr | 2.44E-12 | 0        |
| 06June201 | 581   | 548.8   | -8.86399 | 2 K.VFRKAGE chr4@1355   | 1.01E-09 | 0        |
| 06June201 | 7007  | 909.49  | -22.1701 | 2 R.LGVLYKN chr5@1461   | 4.21E-10 | 0.00627  |
| 06June201 | 3342  | 894.5   | -14.1127 | 2 _VETGIKP Splice@chr   | 3.38E-13 | 0        |
| 06June201 | 3834  | 894     | -12.2343 | 2 _VETGIKP Splice@chr   | 3.92E-13 | 0        |
| 06June201 | 3285  | 894.5   | -14.1127 | 2 _VETGIKP Splice@chr   | 4.27E-13 | 0        |
| 06June201 | 3216  | 894     | -12.2343 | 2 _VETGIKP Splice@chr   | 1.37E-12 | 0        |
| 06June201 | 2745  | 894.5   | -14.1127 | 2 _VETGIKP Splice@chr   | 3.85E-12 | 0        |
| 06June201 | 3185  | 894.5   | -14.1127 | 2 _VETGIKP Splice@chr   | 4.04E-11 | 0        |
| 06June201 | 2898  | 894     | -12.2343 | 2 _VETGIKP Splice@chr   | 5.38E-13 | 0        |
| 06June201 | 3582  | 596.67  | -12.8824 | 3 _VETGIKP Splice@chr   | 8.54E-11 | 0.002041 |
| 06June201 | 3576  | 894     | -12.2343 | 2 _VETGIKP Splice@chr   | 1.12E-13 | 0        |
| 06June201 | 2875  | 894.5   | -14.1127 | 2 _VETGIKP Splice@chr   | 1.33E-11 | 0        |
| 06June201 | 3129  | 894     | -12.2343 | 2 _VETGIKP Splice@chr   | 4.82E-13 | 0        |
| 06June201 | 2491  | 566.81  | 18.41102 | 2 K.NCVRAPK chr5@1902   | 3.95E-10 | 0.00838  |
| 06June201 | 1955  | 488.79  | 14.51505 | 2 K.INIGGSF chr1@1370   | 5.30E-10 | 0.007576 |
| 06June201 | 11490 | 1042.89 | -11.2309 | 3 K.INVSK+1 chr1@1467   | 4.04E-10 | 0.005259 |
| 07Apr2011 | 7558  | 831.39  | -27.5413 | 2 K.KFTFEIEE chrX@1364  | 7.93E-12 | 3.36E-04 |
| 07Apr2011 | 7415  | 831.39  | -27.5413 | 2 K.KFTFEIEE chrX@1364  | 2.07E-10 | 0.004393 |
| 06June201 | 11038 | 638.36  | 5.526422 | 3 R.VGDGAD chr5@1132    | 1.29E-12 | 3.96E-04 |
| 06June201 | 8670  | 766.12  | -16.9116 | 4 R.NSDGIQC Splice@chr  | 4.01E-10 | 0.008226 |

|           |       |         |          |                          |          |          |
|-----------|-------|---------|----------|--------------------------|----------|----------|
| 06June201 | 5210  | 499.28  | 5.144758 | 2 _..VYNIYVAI chrX@1610  | 5.97E-10 | 0.008992 |
| 06June201 | 2338  | 686.76  | -2.93754 | 3 R.FLCILGLL Splice@chr  | 1.25E-10 | 0.005556 |
| 06June201 | 2762  | 523.78  | -23.0783 | 2 R.RWVVCG chrX@1497     | 4.99E-10 | 0.006949 |
| 06June201 | 10318 | 825.73  | -28.8125 | 3 V.HDPAGG chr5@1971     | 3.13E-10 | 0.003501 |
| 06June201 | 9211  | 1056.56 | 28.0642  | 3 I.SRVEDDS Splice@chr   | 9.57E-14 | 0        |
| 06June201 | 9199  | 792.67  | 25.51992 | 4 I.SRVEDDS Splice@chr   | 2.09E-11 | 0        |
| 06June201 | 11428 | 957.5   | 1.956888 | 3 R.FIEPIEDIF Splice@chr | 8.61E-11 | 0.001899 |
| 06June201 | 10274 | 957.5   | 1.956888 | 3 R.FIEPIEDIF Splice@chr | 5.49E-10 | 0.008602 |
| 06June201 | 10373 | 957.5   | 1.956888 | 3 R.FIEPIEDIF Splice@chr | 4.64E-11 | 3.50E-04 |
| 06June201 | 544   | 516.8   | 9.418791 | 2 K.TRWAGI\ chrX@7785    | 4.36E-11 | 0        |
| 06June201 | 6811  | 942.57  | 22.81832 | 1 _..SSLNPRIR chr1@3948  | 4.09E-10 | 0.008226 |
| 06June201 | 1592  | 560.6   | -9.74356 | 3 R.LFFGPGC Splice@chr   | 3.13E-11 | 0        |
| 06June201 | 8865  | 783.45  | -3.51026 | 2 K.MLK+14.I chr5@1675   | 2.35E-10 | 0.005211 |
| 06June201 | 3844  | 783.45  | -3.51026 | 2 K.MLK+14.I chr5@1675   | 7.22E-10 | 0.009693 |
| 07Apr2011 | 3750  | 628.08  | 17.45518 | 4 R.TRRGIPG Splice@chr   | 3.66E-10 | 0.006189 |
| 06June201 | 3327  | 673.87  | 2.177039 | 2 K.KRK+14.C Splice@chr  | 3.29E-10 | 0.006709 |
| 06June201 | 5519  | 1189.67 | -11.091  | 1 K.AYTLPLSI Splice@chr  | 2.17E-10 | 0.00408  |
| 06June201 | 6096  | 1189.67 | -11.091  | 1 K.AYTLPLSI Splice@chr  | 4.03E-10 | 0.005344 |
| 06June201 | 10524 | 1026.53 | 10.02262 | 3 R.NFFGYCC chr4@3457    | 5.11E-10 | 0.006949 |
| 07Apr2011 | 14061 | 751.37  | -29.1192 | 4 R.ICIKAQRS chrX@1215   | 3.03E-10 | 0.00569  |
| 06June201 | 1585  | 477.51  | 28.43678 | 4 K.TIFDGNSi chrX@4805   | 3.32E-10 | 0.00396  |
| 06June201 | 10020 | 868.97  | -20.2518 | 2 R.SNRK+14 chr4@1505    | 6.71E-12 | 7.12E-04 |
| 06June201 | 1929  | 673.32  | -0.81705 | 4 _..QVREMH Splice@chr   | 3.84E-10 | 0.00431  |
| 06June201 | 4323  | 975.81  | -5.15613 | 3 K.SGTIFDNI Splice@chr  | 6.86E-12 | 0        |
| 06June201 | 2698  | 975.81  | -5.15613 | 3 K.SGTIFDNI Splice@chr  | 2.20E-11 | 0        |
| 06June201 | 10579 | 980.48  | -7.04314 | 3 K.SGTIFDNI Splice@chr  | 3.38E-10 | 0.004428 |
| 06June201 | 3541  | 975.81  | -5.15613 | 3 K.SGTIFDNI Splice@chr  | 1.28E-10 | 0.006944 |
| 06June201 | 3878  | 975.81  | -5.15613 | 3 K.SGTIFDNI Splice@chr  | 8.74E-11 | 0.006944 |
| 06June201 | 3582  | 975.81  | -5.15613 | 3 K.SGTIFDNI Splice@chr  | 2.78E-11 | 0        |
| 06June201 | 5776  | 462.21  | 16.87354 | 2 K.MAGMA\ chr3@7867     | 2.89E-10 | 0.003571 |
| 07Apr2011 | 10519 | 501.3   | -0.81333 | 3 K.FLVK+14. chrX@8948   | 5.63E-10 | 0.008846 |
| 06June201 | 5270  | 724.9   | -9.19028 | 2 R.LTFTLTRF chr3@8571   | 5.83E-11 | 0.001188 |
| 06June201 | 3682  | 501.75  | -12.6763 | 2 R.FFNGAAS chrX@4236    | 4.60E-10 | 0.005484 |
| 06June201 | 4035  | 501.75  | -12.6763 | 2 R.FFNGAAS chrX@4236    | 2.24E-10 | 0.003362 |
| 06June201 | 9289  | 968.13  | 18.26018 | 3 _..GCSIVPIS Splice@chr | 4.78E-11 | 9.25E-04 |
| 06June201 | 9248  | 968.13  | 18.26018 | 3 _..GCSIVPIS Splice@chr | 9.47E-11 | 0.002674 |
| 06June201 | 10360 | 968.13  | 18.26018 | 3 _..GCSIVPIS Splice@chr | 1.73E-10 | 0.002592 |
| 07Apr2011 | 7305  | 1051.15 | 14.87916 | 3 E.GGDWSH Splice@chr    | 4.20E-13 | 0        |
| 06June201 | 7865  | 735.06  | 10.34389 | 3 R.WQHALP chr4@7817     | 3.20E-10 | 0.003501 |
| 06June201 | 6319  | 991.54  | -24.3808 | 2 R.RNDRK+1 chr3@4804    | 2.77E-10 | 0.004378 |
| 06June201 | 11023 | 1019.5  | 7.454126 | 3 K.FEISINYM Splice@chr  | 4.60E-11 | 8.41E-04 |
| 06June201 | 2796  | 562.82  | 15.71464 | 2 _..NKLSVG Y chr1@5598  | 1.01E-10 | 0.004    |
| 07Apr2011 | 1628  | 594.8   | -20.0434 | 2 R.KMGIEAC chr2@1114    | 4.59E-10 | 0.007983 |
| 06June201 | 8080  | 759.39  | -7.28686 | 2 K.LSNFREIS chr4@9735   | 1.04E-10 | 0.002674 |
| 06June201 | 8053  | 759.39  | -7.28686 | 2 K.LSNFREIS chr4@9735   | 1.06E-10 | 0.002674 |
| 06June201 | 10189 | 759.39  | -7.28686 | 2 K.LSNFREIS chr4@9735   | 1.02E-10 | 0.002112 |
| 06June201 | 10150 | 759.39  | -7.28686 | 2 K.LSNFREIS chr4@9735   | 5.68E-11 | 0.001114 |

|           |       |         |          |                         |          |          |
|-----------|-------|---------|----------|-------------------------|----------|----------|
| 06June201 | 8527  | 759.39  | -7.28686 | 2 K.LSNFREIS chr4@9735  | 2.15E-11 | 4.14E-04 |
| 06June201 | 8965  | 759.39  | -7.28686 | 2 K.LSNFREIS chr4@9735  | 4.01E-11 | 0        |
| 06June201 | 9257  | 759.39  | -7.28686 | 2 K.LSNFREIS chr4@9735  | 1.12E-10 | 0.00132  |
| 06June201 | 9289  | 759.39  | -7.28686 | 2 K.LSNFREIS chr4@9735  | 7.48E-11 | 0.001718 |
| 06June201 | 8256  | 962     | 12.42448 | 2 Q.FLTNIWV chr2@1126   | 3.63E-10 | 0.006058 |
| 06June201 | 5292  | 516.28  | -11.2528 | 2 K.RGAESVv chrX@1261   | 1.78E-11 | 0        |
| 06June201 | 4786  | 1086.02 | 18.22629 | 2 V.CLTEEGK Splice@chr  | 1.18E-10 | 0.002112 |
| 07Apr2011 | 9575  | 474.51  | 25.76352 | 4 _.RNENLIEI chr5@1252  | 5.83E-10 | 0.008972 |
| 06June201 | 2030  | 509.3   | -20.473  | 2 R.SSVIMLIV chr2@5767  | 5.33E-11 | 0.002915 |
| 06June201 | 2042  | 509.3   | -20.473  | 2 R.SSVIMLIV chr2@5767  | 1.42E-10 | 0.005556 |
| 06June201 | 1784  | 509.3   | -20.473  | 2 R.SSVIMLIV chr2@5767  | 5.38E-11 | 0        |
| 06June201 | 1761  | 509.3   | -20.473  | 2 R.SSVIMLIV chr2@5767  | 2.27E-10 | 0.005008 |
| 06June201 | 1909  | 509.3   | -20.473  | 2 R.SSVIMLIV chr2@5767  | 1.18E-10 | 0.002762 |
| 06June201 | 1923  | 509.3   | -20.473  | 2 R.SSVIMLIV chr2@5767  | 9.61E-11 | 0        |
| 06June201 | 1900  | 509.3   | -20.473  | 2 R.SSVIMLIV chr2@5767  | 4.55E-11 | 0.004    |
| 06June201 | 2657  | 748.06  | -14.4664 | 3 _.LLKVVEW Splice@chr  | 3.04E-10 | 0.007622 |
| 06June201 | 3624  | 1025.62 | -1.90621 | 1 K.LGLGSGI chr5@4945   | 1.23E-11 | 0        |
| 06June201 | 3270  | 1025.62 | -1.90621 | 1 K.LGLGSGI chr5@4945   | 8.92E-12 | 0        |
| 06June201 | 3353  | 1025.62 | -1.90621 | 1 K.LGLGSGI chr5@4945   | 2.27E-11 | 4.14E-04 |
| 06June201 | 3219  | 1025.62 | -1.90621 | 1 K.LGLGSGI chr5@4945   | 2.14E-11 | 4.14E-04 |
| 06June201 | 3242  | 1025.62 | -1.90621 | 1 K.LGLGSGI chr5@4945   | 9.16E-12 | 0        |
| 07Apr2011 | 5396  | 1025.61 | -11.6755 | 1 K.LGLGSGI chr5@4945   | 6.54E-12 | 3.36E-04 |
| 06June201 | 8560  | 786.92  | -5.01098 | 2 _.VK+14.01 chrX@1664  | 1.71E-10 | 0.002592 |
| 06June201 | 5695  | 703.86  | -3.21304 | 2 Y.VVQVAID chr1@1045   | 3.26E-13 | 0        |
| 06June201 | 6823  | 703.86  | -3.21304 | 2 Y.VVQVAID chr1@1045   | 2.81E-13 | 0        |
| 06June201 | 5885  | 507.26  | 28.03163 | 2 K.KNYTTAC chrX@1240   | 1.35E-10 | 0.002679 |
| 07Apr2011 | 3788  | 514.25  | -29.0158 | 2 R.QICAHSR chr1@8858   | 5.24E-10 | 0.008481 |
| 06June201 | 8608  | 791.91  | -21.0408 | 2 _.MIDM+1! chr2@5666   | 5.67E-10 | 0.008602 |
| 06June201 | 6322  | 841.47  | -28.1035 | 1 K.NPVVVW chr4@4552    | 4.34E-11 | 3.47E-04 |
| 06June201 | 5865  | 547.82  | 26.45463 | 2 R.IERLASM chr5@1575   | 3.18E-10 | 0.006855 |
| 07Apr2011 | 8876  | 851.48  | -15.2578 | 2 K.RGVRLSH chr2@2785   | 2.71E-10 | 0.005436 |
| 06June201 | 11059 | 873.47  | 13.68595 | 2 R.SIFVDLEP Splice@chr | 3.89E-10 | 0.005028 |
| 07Apr2011 | 13541 | 750.38  | -16.0136 | 2 V.SWQILFN Splice@chr  | 2.91E-10 | 0.00569  |
| 06June201 | 1289  | 538.93  | -8.28667 | 3 R.ILSTK+14 chr4@3427  | 2.22E-11 | 0        |
| 06June201 | 1269  | 538.93  | -8.28667 | 3 R.ILSTK+14 chr4@3427  | 1.66E-10 | 0.005882 |
| 06June201 | 1652  | 538.93  | -8.28667 | 3 R.ILSTK+14 chr4@3427  | 2.07E-10 | 0.003135 |
| 06June201 | 1635  | 538.93  | -8.28667 | 3 R.ILSTK+14 chr4@3427  | 3.63E-11 | 0        |
| 06June201 | 1526  | 538.93  | -8.28667 | 3 R.ILSTK+14 chr4@3427  | 1.80E-11 | 0        |
| 06June201 | 1563  | 538.93  | -8.28667 | 3 R.ILSTK+14 chr4@3427  | 2.58E-11 | 0        |
| 06June201 | 1731  | 538.93  | -8.28667 | 3 R.ILSTK+14 chr4@3427  | 1.95E-10 | 0.007634 |
| 06June201 | 1532  | 538.93  | -8.28667 | 3 R.ILSTK+14 chr4@3427  | 7.93E-11 | 0        |
| 06June201 | 1352  | 538.93  | -8.28667 | 3 R.ILSTK+14 chr4@3427  | 1.53E-10 | 0.006944 |
| 06June201 | 1466  | 538.93  | -8.28667 | 3 R.ILSTK+14 chr4@3427  | 6.00E-11 | 0.005415 |
| 06June201 | 1381  | 538.93  | -8.28667 | 3 R.ILSTK+14 chr4@3427  | 3.79E-11 | 0        |
| 06June201 | 1762  | 538.93  | -8.28667 | 3 R.ILSTK+14 chr4@3427  | 7.32E-11 | 0.002041 |
| 06June201 | 1793  | 538.93  | -8.28667 | 3 R.ILSTK+14 chr4@3427  | 9.48E-11 | 0.002041 |
| 06June201 | 1412  | 538.93  | -8.28667 | 3 R.ILSTK+14 chr4@3427  | 2.63E-10 | 0.007117 |

|           |       |         |          |                         |          |          |
|-----------|-------|---------|----------|-------------------------|----------|----------|
| 06June201 | 1138  | 538.94  | 10.33295 | 3 R.ILSTK+14 chr4@3427  | 4.59E-11 | 0.003584 |
| 06June201 | 1125  | 538.93  | -8.28667 | 3 R.ILSTK+14 chr4@3427  | 2.88E-13 | 0        |
| 06June201 | 1158  | 538.93  | -8.28667 | 3 R.ILSTK+14 chr4@3427  | 2.21E-12 | 0        |
| 06June201 | 1150  | 538.94  | 10.33295 | 3 R.ILSTK+14 chr4@3427  | 1.03E-10 | 0.003584 |
| 06June201 | 2510  | 562.82  | -13.0366 | 2 R.AQKFNL1 chr3@2690   | 5.15E-10 | 0        |
| 06June201 | 12423 | 962.8   | 16.16136 | 3 _CSIRPISG Splice@chr  | 5.62E-10 | 0.008134 |
| 06June201 | 2543  | 572.64  | -2.70492 | 3 R.LLLFSVCF Splice@chr | 2.49E-10 | 0.004622 |
| 06June201 | 2313  | 572.64  | -2.70492 | 3 R.LLLFSVCF Splice@chr | 2.87E-10 | 0.008237 |
| 06June201 | 2007  | 572.98  | 6.941508 | 3 R.LLLFSVCF Splice@chr | 3.37E-10 | 0.005008 |
| 06June201 | 2352  | 572.64  | -2.70492 | 3 R.LLLFSVCF Splice@chr | 3.00E-10 | 0.005263 |
| 06June201 | 2136  | 572.64  | -2.70492 | 3 R.LLLFSVCF Splice@chr | 2.62E-10 | 0.004717 |
| 06June201 | 2162  | 544.81  | 11.22391 | 2 R.GK+14.01 chr4@6109  | 4.58E-10 | 0        |
| 06June201 | 2336  | 544.81  | 11.22391 | 2 R.GK+14.01 chr4@6109  | 1.03E-10 | 0.001736 |
| 06June201 | 8776  | 1075.57 | -22.0379 | 3 Q.KFRTEK+ chr4@6046   | 3.32E-10 | 0.005716 |
| 06June201 | 4819  | 933.43  | -27.9501 | 2 K.CSQNM+ chr4@1109    | 2.11E-10 | 0.003112 |
| 06June201 | 4370  | 933.94  | -19.0141 | 2 K.CSQNM+ chr4@1109    | 2.27E-10 | 0.004889 |
| 06June201 | 5032  | 580.3   | -23.3897 | 2 L.QLPRGM1 chr5@1990   | 3.88E-10 | 0.007958 |
| 06June201 | 3507  | 580.3   | -23.3897 | 2 L.QLPRGM1 chr5@1990   | 4.15E-10 | 0.00627  |
| 06June201 | 1797  | 660.35  | -21.2694 | 3 K.K+14.016 chr5@1415  | 2.24E-09 | 0.009259 |
| 07Apr2011 | 1709  | 510.3   | 12.8833  | 2 R.RHVAYVF chr1@1479   | 1.31E-11 | 3.36E-04 |
| 07Apr2011 | 1753  | 510.3   | 12.8833  | 2 R.RHVAYVF chr1@1479   | 6.54E-12 | 3.36E-04 |
| 06June201 | 5369  | 682.37  | -2.17975 | 3 K.WFFSIKT1 Splice@chr | 5.78E-10 | 0.008685 |
| 06June201 | 2494  | 544.81  | 7.071031 | 2 K.FLHFFHL1 chr4@2201  | 7.77E-10 | 0.007553 |
| 06June201 | 3697  | 547.79  | 14.47103 | 2 K.AISFVGG1 chr2@1172  | 2.02E-10 | 0.004253 |
| 06June201 | 3668  | 547.79  | 14.47103 | 2 K.AISFVGG1 chr2@1172  | 2.09E-10 | 0.004253 |
| 06June201 | 6876  | 467.77  | -16.3451 | 2 R.KVFGAAS chr1@2317   | 2.32E-10 | 0.002584 |
| 06June201 | 4740  | 1089.65 | -29.1532 | 1 K.KLKSMKN chr5@3701   | 4.06E-11 | 8.41E-04 |
| 06June201 | 4311  | 1089.66 | -19.9587 | 1 K.KLKSMKN chr5@3701   | 4.11E-11 | 3.47E-04 |
| 06June201 | 4351  | 1089.66 | -19.9587 | 1 K.KLKSMKN chr5@3701   | 8.12E-11 | 6.83E-04 |
| 06June201 | 4443  | 1089.65 | -29.1532 | 1 K.KLKSMKN chr5@3701   | 8.87E-11 | 0.002377 |
| 07Apr2011 | 11187 | 744.39  | 26.99177 | 2 L.FTENLTT1 chr5@1256  | 2.88E-10 | 0.00569  |
| 06June201 | 7477  | 861.79  | -13.1218 | 3 K.FQILKIFR1 chr4@1353 | 5.87E-10 | 0.008602 |
| 06June201 | 7471  | 647.82  | -26.1093 | 2 K.NCLKNFE chr4@1026   | 4.56E-10 | 0.007973 |
| 06June201 | 7809  | 647.32  | -23.514  | 2 K.NCLKNFE chr4@1026   | 1.90E-10 | 0.00408  |
| 06June201 | 10298 | 647.32  | -23.514  | 2 K.NCLKNFE chr4@1026   | 3.74E-11 | 0.001018 |
| 06June201 | 6142  | 603.83  | 0.404996 | 2 R.KSCK+14. chrX@5743  | 5.02E-10 | 0.005978 |
| 06June201 | 3230  | 572.3   | -8.86739 | 2 K.QNNKSIF chr3@1271   | 4.02E-10 | 0.005028 |
| 06June201 | 5444  | 554.95  | 17.04197 | 3 R.M+15.99 chr3@1018   | 1.96E-10 | 0.005862 |
| 06June201 | 3922  | 554.95  | 17.04197 | 3 R.M+15.99 chr3@1018   | 1.27E-10 | 0.00132  |
| 06June201 | 3953  | 554.95  | 17.04197 | 3 R.M+15.99 chr3@1018   | 3.50E-10 | 0.006709 |
| 06June201 | 2011  | 795.48  | -0.38412 | 1 K.LMLPPPK Splice@chr  | 4.40E-10 | 0.007973 |
| 06June201 | 5353  | 839.45  | -29.5343 | 2 K.PKPRHRS chr3@2675   | 3.40E-10 | 0.004063 |
| 07Apr2011 | 2390  | 493.61  | 28.00299 | 3 _FQRHNL1 chrX@1408    | 5.39E-10 | 0.0086   |
| 06June201 | 12033 | 768.79  | -3.70977 | 3 K.EEK+14.0 chr1@4125  | 4.82E-10 | 0.00782  |
| 06June201 | 1929  | 657.04  | -26.9179 | 3 R.GNVRK+1 chrX@7490   | 2.71E-10 | 0.007576 |
| 06June201 | 2122  | 657.04  | -26.9179 | 3 R.GNVRK+1 chrX@7490   | 2.74E-10 | 0.002242 |
| 06June201 | 5939  | 657.04  | -26.9179 | 3 R.GNVRK+1 chrX@7490   | 4.01E-10 | 0.006351 |

|           |       |         |          |                         |          |          |
|-----------|-------|---------|----------|-------------------------|----------|----------|
| 06June201 | 2189  | 657.04  | -26.9179 | 3 R.GNVRK+1 chrX@7490   | 6.84E-11 | 0        |
| 06June201 | 2080  | 657.04  | -26.9179 | 3 R.GNVRK+1 chrX@7490   | 1.72E-10 | 0.002353 |
| 06June201 | 1836  | 657.04  | -26.9179 | 3 R.GNVRK+1 chrX@7490   | 1.92E-10 | 0.009217 |
| 06June201 | 2034  | 657.04  | -26.9179 | 3 R.GNVRK+1 Splice@chr  | 9.16E-10 | 0        |
| 06June201 | 2043  | 657.04  | -26.9179 | 3 R.GNVRK+1 chrX@7490   | 5.54E-10 | 0        |
| 06June201 | 2130  | 657.04  | -26.9179 | 3 R.GNVRK+1 chrX@7490   | 3.16E-10 | 0.007117 |
| 06June201 | 2063  | 657.04  | -26.9179 | 3 R.GNVRK+1 chrX@7490   | 6.77E-11 | 0.003584 |
| 06June201 | 10616 | 534.81  | 14.82324 | 2 R.K+14.016 chr2@1510  | 4.33E-10 | 0.005259 |
| 06June201 | 10583 | 534.81  | 14.82324 | 2 R.K+14.016 chr2@1510  | 1.07E-10 | 0.002112 |
| 06June201 | 9650  | 534.81  | 14.82324 | 2 R.K+14.016 chr2@1510  | 1.26E-10 | 0.00132  |
| 07Apr2011 | 7299  | 750.88  | -24.7176 | 2 _LTGTLEGI Splice@chr  | 1.51E-10 | 0.003458 |
| 06June201 | 4486  | 975.56  | -10.3963 | 1 K.IPKMPVY chr2@1115   | 1.07E-10 | 0.002679 |
| 06June201 | 8358  | 704.37  | -20.709  | 2 K.K+14.016 chr1@8175  | 1.45E-10 | 0.003005 |
| 06June201 | 2914  | 714.73  | 23.71719 | 3 K.KTACRPK chrX@6690   | 2.92E-10 | 0.007018 |
| 06June201 | 7379  | 490.74  | -7.60235 | 2 K.DITMEIM chr3@1481   | 4.80E-10 | 0.006949 |
| 06June201 | 9328  | 792.15  | -18.5783 | 4 K.SGTIFDNI Splice@chr | 1.51E-15 | 0        |
| 06June201 | 10872 | 792.15  | -18.5783 | 4 K.SGTIFDNI Splice@chr | 1.41E-15 | 0        |
| 06June201 | 3473  | 575.3   | -5.52647 | 2 R.GCMRAR chr5@9960    | 2.46E-10 | 0.0055   |
| 06June201 | 1976  | 663.04  | -26.4712 | 3 R.LIIVKGGF chr1@1401  | 5.15E-11 | 0        |
| 06June201 | 6934  | 745.89  | 28.16737 | 2 R.KRRNPEC chr4@9970   | 3.70E-10 | 0.006058 |
| 06June201 | 9162  | 983.46  | -2.71299 | 3 K.SGTIFDNI Splice@chr | 1.22E-10 | 0.002674 |
| 06June201 | 9123  | 983.46  | -2.71299 | 3 K.SGTIFDNI Splice@chr | 1.96E-10 | 0.003937 |
| 06June201 | 9142  | 983.46  | -2.71299 | 3 K.SGTIFDNI Splice@chr | 1.17E-10 | 0.002674 |
| 06June201 | 11680 | 983.46  | -2.71299 | 3 K.SGTIFDNI Splice@chr | 5.36E-10 | 0.006434 |
| 06June201 | 11762 | 983.46  | -2.71299 | 3 K.SGTIFDNI Splice@chr | 2.76E-11 | 2.90E-04 |
| 06June201 | 11628 | 983.46  | -2.71299 | 3 K.SGTIFDNI Splice@chr | 3.19E-10 | 0.003813 |
| 06June201 | 9872  | 983.46  | -2.71299 | 3 K.SGTIFDNI Splice@chr | 3.85E-12 | 0        |
| 06June201 | 9892  | 983.46  | -2.71299 | 3 K.SGTIFDNI Splice@chr | 5.13E-11 | 7.98E-04 |
| 06June201 | 9913  | 983.46  | -2.71299 | 3 K.SGTIFDNI Splice@chr | 1.97E-10 | 0.00408  |
| 06June201 | 9848  | 983.46  | -2.71299 | 3 K.SGTIFDNI Splice@chr | 3.60E-11 | 7.98E-04 |
| 06June201 | 10225 | 983.46  | -2.71299 | 3 K.SGTIFDNI Splice@chr | 1.13E-10 | 0.001126 |
| 06June201 | 10487 | 983.46  | -2.71299 | 3 K.SGTIFDNI Splice@chr | 2.13E-10 | 0.002584 |
| 06June201 | 10464 | 983.46  | -2.71299 | 3 K.SGTIFDNI Splice@chr | 3.45E-11 | 3.47E-04 |
| 06June201 | 10560 | 983.46  | -2.71299 | 3 K.SGTIFDNI Splice@chr | 5.52E-10 | 0.008087 |
| 06June201 | 4384  | 983.46  | -2.71299 | 3 K.SGTIFDNI Splice@chr | 8.13E-11 | 0.003584 |
| 06June201 | 1618  | 534.81  | 11.84752 | 2 K.AELVTKN chr1@1387   | 5.51E-10 | 0.008929 |
| 06June201 | 11486 | 1009.49 | 4.541371 | 3 K.SGTIFDNI Splice@chr | 1.93E-10 | 0.002866 |
| 06June201 | 10848 | 768.79  | -4.42622 | 3 _KLAM+15 Splice@chr   | 6.17E-10 | 0.009084 |
| 06June201 | 12224 | 792.15  | -18.5783 | 4 K.SGTIFDNI Splice@chr | 1.59E-13 | 0        |
| 06June201 | 11959 | 792.15  | -18.5783 | 4 K.SGTIFDNI Splice@chr | 9.53E-15 | 0        |
| 06June201 | 12374 | 792.15  | -18.5783 | 4 K.SGTIFDNI Splice@chr | 1.82E-13 | 0        |
| 06June201 | 10728 | 792.15  | -18.5783 | 4 K.SGTIFDNI Splice@chr | 2.02E-15 | 0        |
| 06June201 | 4488  | 555.06  | 24.80319 | 3 _TIFVIKLLK chrX@1495  | 4.50E-10 | 0.009346 |
| 07Apr2011 | 10669 | 645.81  | -5.49009 | 2 K.IVQNFSFI chr5@1950  | 6.02E-10 | 0.009476 |
| 06June201 | 1852  | 472.29  | -0.64754 | 2 _SPLFVPKf chrX@4402   | 1.30E-10 | 0.005882 |
| 06June201 | 2430  | 472.29  | -0.64754 | 2 _SPLFVPKf chrX@4402   | 1.30E-10 | 0.003135 |
| 06June201 | 2450  | 472.29  | -0.64754 | 2 _SPLFVPKf chrX@4402   | 1.30E-10 | 0.003135 |

|           |       |         |          |                         |          |          |
|-----------|-------|---------|----------|-------------------------|----------|----------|
| 06June201 | 2058  | 472.29  | -0.64754 | 2 _SPLFVPKf chrX@440    | 3.73E-10 | 0.00431  |
| 06June201 | 2336  | 472.29  | -0.64754 | 2 _SPLFVPKf chrX@440    | 3.94E-10 | 0.007622 |
| 06June201 | 1950  | 472.29  | -0.64754 | 2 _SPLFVPKf chrX@440    | 1.34E-10 | 0.003584 |
| 06June201 | 7435  | 1092.53 | 14.31508 | 3 K.LDEHFPL' Splice@chr | 5.01E-10 | 0.008783 |
| 06June201 | 7779  | 1092.53 | 14.31508 | 3 K.LDEHFPL' Splice@chr | 7.95E-11 | 0.001924 |
| 06June201 | 6741  | 745.04  | -21.3094 | 3 R.ILANSTLv chr3@706   | 2.79E-10 | 0.006024 |
| 06June201 | 9605  | 993.21  | 7.733752 | 3 K.YEFKK+1+ chr4@559   | 4.38E-10 | 0.006879 |
| 06June201 | 5291  | 574.82  | 8.997898 | 2 K.EIAM+15 chr5@153    | 2.21E-10 | 0.005211 |
| 06June201 | 2269  | 460.78  | 13.49145 | 2 K.GVLIGGF chr3@190    | 4.03E-10 | 0.009174 |
| 06June201 | 3010  | 584.82  | -20.9772 | 2 K.RLERGMI chr1@149    | 3.68E-10 | 0.008929 |
| 06June201 | 9619  | 660.83  | 23.93227 | 2 K.GFSIHSW chr2@113    | 5.41E-10 | 0.006434 |
| 06June201 | 2051  | 562.82  | 5.71063  | 2 R.GKRVGT' Splice@chr  | 2.26E-10 | 0.004717 |
| 07Apr2011 | 4746  | 666.36  | 8.164357 | 2 K.FRWASRI chr3@563    | 4.40E-10 | 0.007619 |
| 06June201 | 3142  | 587.32  | 25.9563  | 3 K.LILGGVAI chr2@145   | 7.27E-10 | 0.00641  |
| 06June201 | 1568  | 416.22  | -8.0358  | 3 R.VETFPVD chr1@171    | 4.43E-10 | 0.006674 |
| 06June201 | 2250  | 505.28  | -8.95659 | 3 _YINIVVIG Splice@chr  | 2.10E-13 | 0        |
| 06June201 | 2316  | 505.28  | -8.95659 | 3 _YINIVVIG Splice@chr  | 5.47E-15 | 0        |
| 06June201 | 2233  | 505.28  | -8.95659 | 3 _YINIVVIG Splice@chr  | 4.21E-15 | 0        |
| 06June201 | 1805  | 505.28  | -8.95659 | 3 _YINIVVIG Splice@chr  | 4.29E-14 | 0        |
| 06June201 | 1748  | 505.61  | -17.7907 | 3 _YINIVVIG Splice@chr  | 1.91E-13 | 0        |
| 06June201 | 2353  | 505.28  | -8.95659 | 3 _YINIVVIG Splice@chr  | 3.54E-15 | 0        |
| 06June201 | 2423  | 505.28  | -8.95659 | 3 _YINIVVIG Splice@chr  | 3.01E-14 | 0        |
| 06June201 | 1994  | 516.8   | 21.18203 | 2 R.GRRFGNI chr5@379    | 6.38E-12 | 0        |
| 06June201 | 3296  | 562.81  | 20.96829 | 2 _REYNICK+ chr1@674    | 3.02E-10 | 0.008108 |
| 06June201 | 5785  | 764.93  | -28.842  | 2 K.LLVPNFD chrX@118    | 3.68E-10 | 0.004296 |
| 06June201 | 9855  | 902.46  | -21.5757 | 3 K.RKLEYTIS Splice@chr | 4.68E-10 | 0.005484 |
| 07Apr2011 | 4228  | 475.76  | 18.38472 | 2 R.VGIADNF chr5@996    | 4.23E-10 | 0.007225 |
| 06June201 | 8884  | 712.4   | -22.2875 | 3 F.LRSLSTEV chrX@166   | 1.67E-10 | 0.002866 |
| 06June201 | 1579  | 650.34  | -11.629  | 3 K.IFFLFFK+ chr4@153   | 1.57E-10 | 0.003584 |
| 06June201 | 11897 | 866.97  | 16.70463 | 2 K.QLWK+1+ chr5@614    | 1.72E-10 | 0.004957 |
| 07Apr2011 | 10326 | 618.32  | 9.392969 | 2 _ICSK+14.( chr2@759   | 5.34E-10 | 0.0086   |
| 07Apr2011 | 10382 | 618.32  | 9.392969 | 2 _ICSK+14.( chr2@759   | 4.93E-10 | 0.008238 |
| 06June201 | 7557  | 555.06  | -2.39612 | 4 _CK+14.01 chr1@127    | 6.53E-12 | 0        |
| 06June201 | 7443  | 805.66  | -28.9749 | 4 R.RIFTLSSN chr5@165   | 6.89E-11 | 7.67E-04 |
| 06June201 | 12011 | 881.2   | -21.484  | 4 R.GDTRKG/ chr4@144    | 4.96E-10 | 0.00782  |
| 07Apr2011 | 10868 | 836.42  | -4.27527 | 2 T.MRCVGK' chrX@119    | 3.47E-10 | 0.005928 |
| 06June201 | 1284  | 548.8   | 5.348202 | 2 K.NIHIAAN' chrX@523   | 1.33E-10 | 0.003135 |
| 06June201 | 3315  | 1003.19 | 17.13413 | 3 R.CWNRRA Splice@chr   | 1.02E-12 | 0        |
| 06June201 | 9571  | 1003.19 | 17.13413 | 3 R.CWNRRA Splice@chr   | 4.76E-11 | 0        |
| 06June201 | 9406  | 1003.19 | 17.13413 | 3 R.CWNRRA Splice@chr   | 6.21E-11 | 3.92E-04 |
| 06June201 | 3513  | 1003.19 | 17.13413 | 3 R.CWNRRA Splice@chr   | 2.15E-12 | 0        |
| 07Apr2011 | 14022 | 1003.18 | 7.145987 | 3 R.CWNRRA Splice@chr   | 6.79E-11 | 0.001364 |
| 06June201 | 11207 | 675.84  | -29.4717 | 4 R.QQGCAA chrX@261     | 4.66E-10 | 0.00782  |
| 06June201 | 8472  | 858.48  | 6.006088 | 3 _LETGIKPI Splice@chr  | 2.18E-11 | 0        |
| 06June201 | 8516  | 858.48  | 6.006088 | 3 _LETGIKPI Splice@chr  | 7.48E-12 | 0        |
| 06June201 | 3753  | 858.48  | 6.006088 | 3 _LETGIKPI Splice@chr  | 6.44E-13 | 0        |
| 06June201 | 7030  | 858.48  | 6.006088 | 3 _LETGIKPI Splice@chr  | 3.36E-11 | 7.98E-04 |

|           |       |         |          |                          |          |          |
|-----------|-------|---------|----------|--------------------------|----------|----------|
| 06June201 | 7490  | 858.48  | 6.006088 | 3 _..LETGIKPI Splice@chr | 8.91E-12 | 0        |
| 06June201 | 3113  | 858.48  | 6.006088 | 3 _..LETGIKPI Splice@chr | 1.60E-12 | 0        |
| 06June201 | 6107  | 1128.05 | 6.854678 | 2 _..IPSAVGY( Splice@chr | 2.98E-13 | 0        |
| 06June201 | 6855  | 1128.05 | 6.854678 | 2 _..IPSAVGY( Splice@chr | 2.69E-11 | 0        |
| 06June201 | 6324  | 1128.05 | 6.854678 | 2 _..IPSAVGY( Splice@chr | 1.61E-12 | 0        |
| 06June201 | 6373  | 1128.05 | 6.854678 | 2 _..IPSAVGY( Splice@chr | 3.92E-12 | 0        |
| 06June201 | 2497  | 1128.05 | 6.854678 | 2 _..IPSAVGY( Splice@chr | 1.31E-13 | 0        |
| 06June201 | 5886  | 636.39  | 2.785764 | 2 K.ITDEK+14 chr5@7614   | 5.08E-10 | 0.006193 |
| 06June201 | 7894  | 517.96  | 13.74563 | 3 R.KMEQKM chrX@7047     | 4.65E-10 | 0.007181 |
| 06June201 | 10023 | 624.06  | -15.8506 | 4 R.SMNLPV Splice@chr    | 3.88E-10 | 0.005038 |
| 07Apr2011 | 9565  | 660.7   | 6.141439 | 3 R.KIANKW/ chr3@2521    | 5.34E-10 | 0.0086   |
| 06June201 | 6554  | 1111.11 | -2.0893  | 2 R.LLM+15.5 chr4@3284   | 6.20E-10 | 0.009291 |
| 06June201 | 6588  | 1111.11 | -2.0893  | 2 R.LLM+15.5 chr4@3284   | 8.53E-12 | 0        |
| 07Apr2011 | 10694 | 833.93  | -9.2006  | 2 _..IIEPYVAV Splice@chr | 2.72E-11 | 7.76E-04 |
| 07Apr2011 | 11416 | 833.42  | -19.2103 | 2 _..IIEPYVAV Splice@chr | 6.91E-11 | 0.001364 |
| 06June201 | 10783 | 756.88  | -11.6276 | 2 _..FTEITNEv Splice@chr | 2.43E-10 | 0.006304 |
| 06June201 | 1026  | 519.6   | -26.5197 | 3 K.IGSM+15 chr5@1654    | 5.80E-10 | 0.008104 |
| 06June201 | 1011  | 519.6   | -26.5197 | 3 K.IGSM+15 chr5@1654    | 5.15E-10 | 0.006536 |
| 06June201 | 2570  | 587.81  | -24.93   | 2 _..FQNLAPN chr1@5964   | 1.87E-10 | 0.006289 |
| 06June201 | 2279  | 587.81  | -24.93   | 2 _..FQNLAPN chr1@5964   | 2.20E-10 | 0.004717 |
| 06June201 | 7142  | 550.82  | 1.472544 | 4 K.NPSKIQK chr3@2560    | 2.97E-10 | 0.006575 |
| 06June201 | 9061  | 1009.01 | -21.8583 | 2 K.MRK+14. chr3@1189    | 4.58E-10 | 0.007973 |
| 06June201 | 4842  | 557.83  | -12.2765 | 2 R.LLLKDPLN chrX@1142   | 5.91E-10 | 0.008364 |
| 06June201 | 1755  | 673.32  | -23.1345 | 4 _..QVREMH Splice@chr   | 3.75E-11 | 0        |
| 06June201 | 4983  | 673.32  | -23.1345 | 4 _..QVREMH Splice@chr   | 2.64E-10 | 0.005618 |
| 06June201 | 1832  | 673.32  | -23.1345 | 4 _..QVREMH Splice@chr   | 6.97E-10 | 0.007353 |
| 06June201 | 2160  | 673.32  | -23.1345 | 4 _..QVREMH Splice@chr   | 2.48E-10 | 0.007622 |
| 06June201 | 6057  | 673.32  | -23.1345 | 4 _..QVREMH Splice@chr   | 5.91E-10 | 0.008364 |
| 06June201 | 2418  | 897.42  | -27.6753 | 3 _..QVREMH Splice@chr   | 6.15E-10 | 0.009889 |
| 06June201 | 5316  | 897.42  | -27.6753 | 3 _..QVREMH Splice@chr   | 3.13E-10 | 0.005378 |
| 06June201 | 1860  | 673.32  | -23.1345 | 4 _..QVREMH Splice@chr   | 3.35E-11 | 0.002353 |
| 06June201 | 2214  | 673.32  | -23.1345 | 4 _..QVREMH Splice@chr   | 1.18E-10 | 0.00295  |
| 06June201 | 1833  | 673.32  | -23.1345 | 4 _..QVREMH Splice@chr   | 3.28E-11 | 0        |
| 06June201 | 1809  | 673.32  | -23.1345 | 4 _..QVREMH Splice@chr   | 1.10E-10 | 0.004796 |
| 06June201 | 2019  | 673.32  | -23.1345 | 4 _..QVREMH Splice@chr   | 6.14E-12 | 0        |
| 06June201 | 2183  | 673.32  | -23.1345 | 4 _..QVREMH Splice@chr   | 2.10E-10 | 0.009112 |
| 06June201 | 2165  | 673.32  | -23.1345 | 4 _..QVREMH Splice@chr   | 6.19E-11 | 0.002427 |
| 06June201 | 1813  | 673.32  | -23.1345 | 4 _..QVREMH Splice@chr   | 5.84E-11 | 0.001736 |
| 06June201 | 2426  | 673.32  | -23.1345 | 4 _..QVREMH Splice@chr   | 2.31E-10 | 0.002041 |
| 06June201 | 2400  | 673.32  | -23.1345 | 4 _..QVREMH Splice@chr   | 2.89E-10 | 0.00396  |
| 06June201 | 2058  | 673.32  | -23.1345 | 4 _..QVREMH Splice@chr   | 2.33E-11 | 0        |
| 06June201 | 1986  | 673.32  | -23.1345 | 4 _..QVREMH Splice@chr   | 4.32E-11 | 0        |
| 06June201 | 1935  | 673.32  | -23.1345 | 4 _..QVREMH Splice@chr   | 1.28E-10 | 0.007117 |
| 06June201 | 1782  | 673.32  | -23.1345 | 4 _..QVREMH Splice@chr   | 3.17E-10 | 0.005828 |
| 06June201 | 12451 | 970.45  | -29.5364 | 3 _..VACNKM Splice@chr   | 3.87E-11 | 5.73E-04 |
| 06June201 | 10431 | 970.46  | -19.2078 | 3 _..VACNKM Splice@chr   | 4.93E-11 | 7.98E-04 |
| 06June201 | 10733 | 970.45  | -29.5364 | 3 _..VACNKM Splice@chr   | 2.41E-10 | 0.005049 |

|           |       |         |          |                         |          |          |
|-----------|-------|---------|----------|-------------------------|----------|----------|
| 06June201 | 3528  | 493.78  | -11.3951 | 2 R.KNQENLI Splice@chr  | 2.64E-10 | 0.005049 |
| 06June201 | 2275  | 620.82  | -12.0136 | 2 K.SRTYLLM chr2@140    | 1.03E-10 | 0        |
| 06June201 | 5982  | 620.82  | -12.0136 | 2 K.SRTYLLM chr2@140    | 2.87E-10 | 0.004378 |
| 06June201 | 8446  | 620.82  | -12.0136 | 2 K.SRTYLLM chr2@140    | 9.44E-11 | 0.003551 |
| 06June201 | 6513  | 620.82  | -12.0136 | 2 K.SRTYLLM chr2@140    | 3.85E-10 | 0.006351 |
| 06June201 | 6546  | 620.82  | -12.0136 | 2 K.SRTYLLM chr2@140    | 3.48E-10 | 0.004428 |
| 06June201 | 6730  | 620.82  | -12.0136 | 2 K.SRTYLLM chr2@140    | 1.32E-10 | 0.002679 |
| 06June201 | 2240  | 620.82  | -12.0136 | 2 K.SRTYLLM chr2@140    | 4.59E-10 | 0.008929 |
| 06June201 | 2558  | 620.82  | -12.0136 | 2 K.SRTYLLM chr2@140    | 1.17E-10 | 0.001689 |
| 06June201 | 4416  | 975.56  | -2.75567 | 1 K.LPKLDAYI chr4@114   | 1.06E-10 | 0.001015 |
| 06June201 | 4457  | 975.55  | -13.0268 | 1 K.LPKLDAYI chr4@114   | 8.56E-11 | 0.002377 |
| 06June201 | 8169  | 1143.1  | -6.28116 | 2 G.LFFGVHY Splice@chr  | 6.43E-10 | 0.008602 |
| 06June201 | 3297  | 675.86  | -6.85271 | 4 R.INQDM+ chr4@126     | 6.95E-10 | 0.005859 |
| 06June201 | 1629  | 560.6   | -22.2499 | 3 _EMFSAA\ chr4@341     | 5.52E-10 | 0.00431  |
| 07Apr2011 | 9471  | 554.26  | 6.682444 | 2 R.M+15.99 Splice@chr  | 2.90E-10 | 0.00569  |
| 06June201 | 5709  | 475.24  | -25.5684 | 3 R.IGFSATM chr3@821    | 1.62E-10 | 0.002866 |
| 06June201 | 8639  | 1011.17 | 5.478214 | 3 R.CWNRRA Splice@chr   | 3.84E-10 | 0.007973 |
| 07Apr2011 | 10337 | 580.66  | 3.439687 | 3 _LDLFEYS\ chr3@255    | 3.25E-10 | 0.005928 |
| 06June201 | 6890  | 542.81  | 7.209787 | 2 R.WALEPVI Splice@chr  | 3.52E-10 | 0.006519 |
| 06June201 | 10786 | 643.87  | -21.2342 | 2 R.FSISLLFF\ chr2@149  | 2.45E-10 | 0.003571 |
| 06June201 | 5350  | 563.67  | -17.7628 | 3 K.VTTVAKL\ chr2@145   | 2.69E-10 | 0.006024 |
| 06June201 | 3597  | 604.78  | 18.09539 | 2 R.AHSCLAC chr2@111    | 5.40E-10 | 0.00396  |
| 06June201 | 1590  | 487.76  | -22.3612 | 4 K.VFKIGFW chr3@238    | 2.47E-10 | 0.004717 |
| 06June201 | 2173  | 641.83  | 15.81093 | 2 _WYVDDV chrX@130      | 6.55E-10 | 0.007553 |
| 06June201 | 7260  | 760.71  | 10.17662 | 3 R.WHRRSG chr5@134     | 8.49E-11 | 0.001899 |
| 06June201 | 6578  | 760.71  | 10.17662 | 3 R.WHRRSG chr5@134     | 2.58E-10 | 0.0055   |
| 06June201 | 9267  | 1142.59 | 12.00935 | 2 R.TSM+15.\ chrX@155   | 1.03E-10 | 0.002112 |
| 06June201 | 8408  | 1142.59 | 12.00935 | 2 R.TSM+15.\ chrX@155   | 8.44E-11 | 0.002377 |
| 06June201 | 3618  | 554.82  | -5.45833 | 2 R.NLVLK+1. Splice@chr | 6.41E-10 | 0.005859 |
| 06June201 | 5786  | 671.37  | -24.0361 | 2 T.FNIVHTQ Splice@chr  | 1.80E-10 | 0.003518 |
| 06June201 | 5816  | 671.37  | -24.0361 | 2 T.FNIVHTQ Splice@chr  | 5.30E-10 | 0.009151 |
| 06June201 | 5750  | 671.37  | -24.0361 | 2 T.FNIVHTQ Splice@chr  | 4.93E-10 | 0.008783 |
| 06June201 | 7136  | 671.37  | -24.0361 | 2 T.FNIVHTQ Splice@chr  | 2.64E-10 | 0.003571 |
| 06June201 | 7050  | 671.37  | -24.0361 | 2 T.FNIVHTQ Splice@chr  | 4.06E-10 | 0.005259 |
| 06June201 | 7096  | 671.37  | -24.0361 | 2 T.FNIVHTQ Splice@chr  | 1.99E-10 | 0.003112 |
| 06June201 | 5852  | 671.37  | -24.0361 | 2 T.FNIVHTQ Splice@chr  | 3.28E-10 | 0.005806 |
| 06June201 | 5809  | 671.37  | -24.0361 | 2 T.FNIVHTQ Splice@chr  | 3.95E-10 | 0.007954 |
| 06June201 | 6210  | 671.37  | -24.0361 | 2 T.FNIVHTQ Splice@chr  | 6.88E-10 | 0.008582 |
| 06June201 | 6283  | 671.37  | -24.0361 | 2 T.FNIVHTQ Splice@chr  | 6.74E-10 | 0.008582 |
| 06June201 | 6248  | 671.37  | -24.0361 | 2 T.FNIVHTQ Splice@chr  | 1.57E-10 | 0.001862 |
| 06June201 | 6415  | 671.37  | -24.0361 | 2 T.FNIVHTQ Splice@chr  | 1.06E-10 | 0.001015 |
| 06June201 | 6482  | 671.37  | -24.0361 | 2 T.FNIVHTQ Splice@chr  | 4.72E-10 | 0.00782  |
| 06June201 | 6452  | 671.37  | -24.0361 | 2 T.FNIVHTQ Splice@chr  | 5.79E-10 | 0.008685 |
| 07Apr2011 | 15057 | 880.99  | -18.4933 | 2 E.NWGIWK chr2@412     | 5.94E-10 | 0.009218 |
| 06June201 | 9110  | 835.7   | -23.6913 | 4 K.FKKKFPD chrX@165    | 4.89E-10 | 0.006949 |
| 07Apr2011 | 3852  | 554.27  | 2.868294 | 2 K.ISM+15.9 chr4@151   | 2.02E-10 | 0.004393 |
| 06June201 | 8329  | 849.42  | 8.560987 | 2 Q.DSSYFVE Splice@chr  | 5.99E-11 | 9.25E-04 |

|           |       |         |          |                          |          |          |
|-----------|-------|---------|----------|--------------------------|----------|----------|
| 06June201 | 9572  | 849.42  | 8.560987 | 2 Q.DSSYFVE Splice@chr   | 1.14E-10 | 0.00132  |
| 06June201 | 10428 | 731.59  | -21.5395 | 4 _._VACNKM Splice@chr   | 2.93E-10 | 0.004378 |
| 06June201 | 11127 | 731.59  | -21.5395 | 4 _._VACNKM Splice@chr   | 5.70E-10 | 0.008602 |
| 06June201 | 9568  | 889.97  | 17.27897 | 2 S.LINLDPQI Splice@chr  | 5.63E-10 | 0.008134 |
| 06June201 | 11425 | 819.1   | -3.35779 | 3 R.ITSSSVKN chr2@6680   | 4.57E-10 | 0.009641 |
| 06June201 | 9446  | 819.1   | -3.35779 | 3 R.ITSSSVKN chr2@6680   | 2.52E-10 | 0.005049 |
| 06June201 | 2433  | 471.28  | 10.90222 | 2 R.KDEPVVV Splice@chr   | 4.70E-10 | 0.005484 |
| 06June201 | 2697  | 866.46  | -9.6852  | 3 R.K+14.016 chr3@6475   | 6.05E-10 | 0.00431  |
| 06June201 | 3151  | 866.79  | -14.9266 | 3 R.K+14.016 chr3@6475   | 2.19E-11 | 0        |
| 06June201 | 3624  | 866.79  | -14.9266 | 3 R.K+14.016 chr3@6475   | 1.01E-10 | 0.003989 |
| 06June201 | 7461  | 866.45  | -21.251  | 3 R.K+14.016 chr3@6475   | 3.78E-10 | 0.007609 |
| 06June201 | 3807  | 682.38  | -12.8989 | 1 R.GAPNPVI chr5@6245    | 5.98E-10 | 0.007953 |
| 06June201 | 7257  | 752.72  | -3.4643  | 3 V.WPTDKTI chrX@9358    | 3.82E-10 | 0.005028 |
| 06June201 | 8249  | 752.72  | -3.4643  | 3 V.WPTDKTI chrX@9358    | 2.66E-10 | 0.006304 |
| 06June201 | 6794  | 570.3   | -19.5582 | 3 R.NPRNSEV chr1@1106    | 4.69E-10 | 0.00782  |
| 07Apr2011 | 3359  | 785.4   | -3.9684  | 2 K.SVETENA Splice@chr   | 9.39E-11 | 0.00267  |
| 06June201 | 2902  | 523.78  | 4.267646 | 2 K.RWEGRM chrX@6840     | 1.78E-10 | 0.003518 |
| 06June201 | 6951  | 1127.05 | -7.23835 | 2 _._IPSAVGYI Splice@chr | 1.63E-14 | 0        |
| 06June201 | 2811  | 562.31  | -13.4391 | 2 R.FYLLYLYK Splice@chr  | 1.11E-10 | 0.004147 |
| 06June201 | 2788  | 562.31  | -13.4391 | 2 R.FYLLYLYK Splice@chr  | 5.24E-11 | 0.001677 |
| 07Apr2011 | 1369  | 562.31  | -13.4391 | 2 R.FYLLYLYK Splice@chr  | 4.73E-11 | 9.26E-04 |
| 07Apr2011 | 1407  | 562.31  | -13.4391 | 2 R.FYLLYLYK Splice@chr  | 4.80E-11 | 9.26E-04 |
| 06June201 | 3031  | 585.79  | 20.77055 | 2 K.QNCFGKI chr1@1338    | 1.93E-10 | 0.003658 |
| 06June201 | 8477  | 882.92  | -6.57469 | 2 _._SSNM+15 chr3@6964   | 4.13E-10 | 0.008226 |
| 06June201 | 5410  | 906.5   | 3.302881 | 1 K.ILEVSSMI Splice@chr  | 2.90E-10 | 0.006304 |
| 06June201 | 6240  | 676.85  | -27.7243 | 2 R.CRVFGGI Splice@chr   | 4.80E-10 | 0.00782  |
| 06June201 | 9902  | 897.46  | 8.122101 | 4 R.FWFFGKI chr2@7020    | 1.34E-10 | 0.001126 |
| 06June201 | 9923  | 897.46  | 8.122101 | 4 R.FWFFGKI chr2@7020    | 2.34E-10 | 0.004746 |
| 06June201 | 9877  | 897.21  | 9.057944 | 4 R.FWFFGKI chr2@7020    | 4.11E-10 | 0.006351 |
| 06June201 | 5094  | 978.84  | 20.39057 | 3 _._RPGFPGV Splice@chr  | 1.66E-10 | 0.003005 |
| 06June201 | 2255  | 590.05  | -15.0039 | 4 K.LINNSLEF chr5@1931   | 9.70E-11 | 0        |
| 06June201 | 2879  | 754.94  | 28.09244 | 2 K.RRKINSSI chr5@8964   | 3.32E-10 | 0.005682 |
| 06June201 | 9926  | 754.94  | 28.09244 | 2 K.RRKINSSI chr5@8964   | 1.42E-10 | 0.004671 |
| 06June201 | 8051  | 754.94  | 28.09244 | 2 K.RRKINSSI chr5@8964   | 4.43E-10 | 0.006879 |
| 06June201 | 8078  | 754.94  | 28.09244 | 2 K.RRKINSSI chr5@8964   | 3.96E-10 | 0.005344 |
| 06June201 | 8168  | 754.94  | 28.09244 | 2 K.RRKINSSI chr5@8964   | 4.12E-10 | 0.007609 |
| 06June201 | 8066  | 754.94  | 28.09244 | 2 K.RRKINSSI chr5@8964   | 8.69E-11 | 0.002377 |
| 06June201 | 2610  | 754.94  | 28.09244 | 2 K.RRKINSSI chr5@8964   | 1.64E-10 | 0.009901 |
| 06June201 | 3315  | 730.62  | -23.9245 | 4 K.CVDIFPEI chrX@1094   | 3.76E-10 | 0.005038 |
| 06June201 | 9318  | 557.06  | -8.53706 | 4 K.EVMLRPC chrX@1653    | 4.69E-10 | 0.006674 |
| 06June201 | 2100  | 548.8   | 28.0787  | 2 K.PCK+14.C chr3@9335   | 1.68E-10 | 0.001689 |
| 06June201 | 2921  | 650.09  | 28.62225 | 4 K.VQEK+14 chr4@9607    | 3.68E-11 | 0.003584 |
| 06June201 | 8400  | 893.97  | 13.9871  | 2 R.SADRWYI chr3@1203    | 5.75E-10 | 0.00993  |
| 06June201 | 1429  | 696.37  | -15.3603 | 2 _._LPTSPIGI chr5@1204  | 5.58E-10 | 0.005859 |
| 06June201 | 8738  | 910.99  | -10.2621 | 2 R.ENYRDNI chr1@1482    | 4.65E-10 | 0.005484 |
| 07Apr2011 | 2143  | 418.89  | -10.5715 | 3 R.ENFATKC chr5@5231    | 4.48E-10 | 0.00788  |
| 07Apr2011 | 2103  | 418.56  | 0        | 3 R.ENFATKC chr5@5231    | 6.32E-11 | 0.001217 |

|           |       |         |          |                         |          |          |
|-----------|-------|---------|----------|-------------------------|----------|----------|
| 06June201 | 4536  | 444.75  | 10.24731 | 2 K.FPLSAEPI chr1@4401  | 1.26E-10 | 0.004671 |
| 06June201 | 4507  | 444.75  | 10.24731 | 2 K.FPLSAEPI chr1@4401  | 2.25E-10 | 0.006103 |
| 06June201 | 2683  | 456.25  | -12.692  | 3 R.IKK+14.0 chr4@7168  | 7.02E-10 | 0.008916 |
| 07Apr2011 | 12327 | 725.87  | -2.94708 | 2 R.NYIGIENI chr5@9105  | 4.45E-10 | 0.007751 |
| 06June201 | 9294  | 703.71  | 21.81318 | 3 V.LEVEVLG chr1@1285   | 9.38E-11 | 0.001015 |
| 06June201 | 2828  | 544.81  | -14.1192 | 4 K.IEFLAKER Splice@chr | 2.40E-10 | 0.005682 |
| 07Apr2011 | 16716 | 828.39  | -5.61062 | 1 K.SHSGFHR chr3@6175   | 5.43E-10 | 0.00873  |
| 06June201 | 1534  | 516.8   | -17.2763 | 2 _SRRVACK chr2@1105    | 1.07E-10 | 0        |
| 06June201 | 413   | 516.8   | -17.2763 | 2 _SRRVACK chr2@1105    | 4.28E-10 | 0.00396  |
| 06June201 | 2405  | 659.65  | -24.6915 | 3 K.YENKSDF chr1@3124   | 4.04E-10 | 0.005263 |
| 06June201 | 8809  | 859.91  | -23.4383 | 4 _ISMTNSN chrX@1761    | 7.93E-11 | 0.001833 |
| 06June201 | 11203 | 859.91  | -23.4383 | 4 _ISMTNSN chrX@1761    | 5.96E-11 | 0.001114 |
| 06June201 | 10208 | 859.91  | -23.4383 | 4 _ISMTNSN chrX@1761    | 8.70E-11 | 0.002377 |
| 06June201 | 495   | 548.8   | -2.00556 | 2 K.SFWKKW chr5@1349    | 2.07E-10 | 0.003774 |
| 06June201 | 484   | 548.8   | -2.00556 | 2 K.SFWKKW chr5@1349    | 5.08E-10 | 0.00838  |
| 06June201 | 474   | 548.8   | -2.00556 | 2 K.SFWKKW chr5@1349    | 4.63E-10 | 0        |
| 06June201 | 753   | 548.8   | -2.00556 | 2 K.SFWKKW chr5@1349    | 6.76E-10 | 0.009901 |
| 06June201 | 707   | 548.8   | -2.00556 | 2 K.SFWKKW chr5@1349    | 5.41E-11 | 0.003846 |
| 06June201 | 5253  | 931.78  | -28.5023 | 3 _VFGGK+1 chr5@3050    | 4.80E-10 | 0.00782  |
| 06June201 | 3426  | 603     | -12.91   | 3 R.QLYKARA chr2@1234   | 1.66E-10 | 0.003518 |
| 07Apr2011 | 14107 | 864.95  | 22.09183 | 2 R.KSSTLMR chr4@1655   | 1.29E-10 | 0.00306  |
| 06June201 | 5360  | 518.59  | -1.022   | 3 _FVVDGSS chr5@1240    | 1.66E-10 | 0.003518 |
| 06June201 | 5924  | 518.59  | -1.022   | 3 _FVVDGSS chr5@1240    | 2.67E-10 | 0.0055   |
| 06June201 | 6696  | 866.45  | 4.257487 | 3 R.DRNNLK\ chrX@1698   | 2.39E-10 | 0.005211 |
| 06June201 | 8537  | 594.79  | -18.7916 | 4 E.LDDIHAN chr3@4214   | 1.91E-10 | 0.00408  |
| 07Apr2011 | 1401  | 423.24  | -12.4437 | 2 R.RAPPTFR chr5@4235   | 1.70E-10 | 0.003876 |
| 07Apr2011 | 8361  | 616.87  | 19.92055 | 2 R.QVYLLLC' Splice@chr | 5.59E-10 | 0.008846 |
| 06June201 | 4386  | 652.35  | 25.55707 | 2 K.KNRSGVI chr2@5628   | 3.96E-10 | 0.007973 |
| 06June201 | 7876  | 596.84  | 23.63394 | 2 G.M+15.99 chr3@1272   | 4.03E-10 | 0.008226 |
| 07Apr2011 | 7251  | 750.38  | -22.4793 | 2 _LTGTLEGI Splice@chr  | 7.48E-14 | 0        |
| 07Apr2011 | 8930  | 851.48  | -15.2578 | 2 K.RGVRLSH chr2@2785   | 5.32E-10 | 0.0086   |
| 07Apr2011 | 8825  | 851.49  | -3.4814  | 2 K.RGVRLSH chr2@2785   | 1.32E-10 | 0.003195 |
| 07Apr2011 | 3309  | 785.4   | -3.9684  | 2 K.SVETENA Splice@chr  | 4.82E-10 | 0.008108 |
| 07Apr2011 | 4693  | 493.78  | -11.3951 | 2 R.KNQENLI Splice@chr  | 6.36E-10 | 0.009852 |
| 07Apr2011 | 14064 | 864.95  | 22.09183 | 2 R.KSSTLMR chr4@1655   | 2.82E-11 | 7.76E-04 |
| 07Apr2011 | 11335 | 893.99  | -23.4434 | 2 _VETGIIKP Splice@chr  | 7.84E-12 | 3.36E-04 |
| 07Apr2011 | 9521  | 554.26  | 6.682444 | 2 R.M+15.99 Splice@chr  | 1.66E-10 | 0.003876 |
| 07Apr2011 | 7737  | 750.38  | -22.4793 | 2 _LTGTLEGI Splice@chr  | 4.38E-16 | 0        |
| 07Apr2011 | 9582  | 851.48  | -15.2578 | 2 K.RGVRLSH chr2@2785   | 3.66E-10 | 0.005915 |
| 07Apr2011 | 12792 | 1056.56 | 28.0642  | 3 I.SRVEDDS\ Splice@chr | 8.99E-15 | 0        |
| 07Apr2011 | 10126 | 554.26  | 6.682444 | 2 R.M+15.99 Splice@chr  | 2.16E-10 | 0.003523 |
| 07Apr2011 | 5205  | 493.78  | -11.3951 | 2 R.KNQENLI Splice@chr  | 5.53E-10 | 0.009307 |
| 07Apr2011 | 5435  | 493.78  | -11.3951 | 2 R.KNQENLI Splice@chr  | 5.35E-10 | 0.008838 |
| 07Apr2011 | 16164 | 634.84  | 6.410455 | 2 R.VDIGDILF Splice@chr | 4.95E-12 | 0        |
| 07Apr2011 | 12274 | 893.99  | -23.4434 | 2 _VETGIIKP Splice@chr  | 4.53E-11 | 8.68E-04 |
| 07Apr2011 | 11645 | 835.92  | -2.26621 | 2 T.MRCVGK' chrX@1194   | 3.75E-10 | 0.006028 |
| 07Apr2011 | 1674  | 562.31  | -13.4391 | 2 R.FYLLYLYK Splice@chr | 4.91E-11 | 0.001007 |

|           |       |         |          |                         |          |          |
|-----------|-------|---------|----------|-------------------------|----------|----------|
| 07Apr2011 | 7871  | 1051.15 | 14.87916 | 3 E.GGDWSH Splice@chr   | 4.13E-14 | 0        |
| 07Apr2011 | 15310 | 1003.19 | 17.13413 | 3 R.CWNRRA Splice@chr   | 4.41E-12 | 0        |
| 07Apr2011 | 12744 | 1056.56 | 28.0642  | 3 I.SRVEDDS Splice@chr  | 3.51E-14 | 0        |
| 07Apr2011 | 6996  | 560.6   | -22.2499 | 3 _EMFSAA\ chr4@3419    | 4.15E-10 | 0.006362 |
| 07Apr2011 | 7922  | 1051.15 | 14.87916 | 3 E.GGDWSH Splice@chr   | 7.32E-14 | 0        |
| 07Apr2011 | 1989  | 594.8   | -20.0434 | 2 R.KMGIEAC chr2@1114   | 4.28E-10 | 0.006836 |
| 07Apr2011 | 11435 | 833.93  | -9.2006  | 2 _IIEPYVAV Splice@chr  | 1.76E-10 | 0.002907 |
| 07Apr2011 | 8104  | 831.39  | -27.5413 | 2 K.KFTFEIEE chrX@1364  | 4.42E-12 | 0        |
| 07Apr2011 | 16197 | 634.84  | 6.410455 | 2 R.VDIGDILF Splice@chr | 6.05E-13 | 0        |
| 07Apr2011 | 14728 | 750.38  | -16.0136 | 2 V.SWQILFN Splice@chr  | 2.76E-10 | 0.004212 |
| 07Apr2011 | 2602  | 493.61  | 28.00299 | 3 _FQRHNLN chrX@1408    | 3.57E-10 | 0.005549 |
| 07Apr2011 | 15419 | 864.95  | 22.09183 | 2 R.KSSTLMR chr4@1659   | 6.18E-11 | 0.001274 |
| 07Apr2011 | 8250  | 897.42  | -27.6753 | 3 _QVREMH Splice@chr    | 2.96E-10 | 0.004212 |
| 07Apr2011 | 2035  | 510.3   | 12.8833  | 2 R.RHVAYVF chr1@1479   | 1.88E-10 | 0.003022 |
| 07Apr2011 | 7789  | 750.38  | -22.4793 | 2 _LTGTLEGI Splice@chr  | 6.78E-17 | 0        |
| 07Apr2011 | 11487 | 833.93  | -9.2006  | 2 _IIEPYVAV Splice@chr  | 2.76E-10 | 0.004212 |
| 07Apr2011 | 12226 | 894     | -12.2343 | 2 _VETGIKP Splice@chr   | 1.78E-11 | 3.05E-04 |
| 07Apr2011 | 5913  | 1017.59 | -22.5744 | 1 R.SSVIMLIV chr2@5767  | 1.88E-11 | 0        |
| 07Apr2011 | 7986  | 554.26  | 6.682444 | 2 R.M+15.99 Splice@chr  | 3.29E-10 | 0.008681 |
| 07Apr2011 | 7571  | 851.48  | -15.2578 | 2 K.RGVRLSH chr2@2789   | 9.19E-11 | 0.001845 |
| 07Apr2011 | 6069  | 509.3   | -20.473  | 2 R.SSVIMLIV chr2@5767  | 9.55E-11 | 0.001845 |
| 07Apr2011 | 8661  | 618.32  | 9.392969 | 2 _ICSK+14.( chr2@7590  | 2.05E-10 | 0.005746 |
| 07Apr2011 | 5963  | 1017.59 | -22.5744 | 1 R.SSVIMLIV chr2@5767  | 1.88E-11 | 0        |
| 07Apr2011 | 7755  | 671.37  | -24.0361 | 2 T.FNIVHTQ Splice@chr  | 3.32E-10 | 0.009109 |
| 07Apr2011 | 6123  | 509.3   | -20.473  | 2 R.SSVIMLIV chr2@5767  | 5.91E-11 | 4.75E-04 |
| 07Apr2011 | 1097  | 562.31  | -13.4391 | 2 R.FYLLLYK Splice@chr  | 1.68E-10 | 0.004033 |
| 07Apr2011 | 12046 | 864.95  | 22.09183 | 2 R.KSSTLMR chr4@1659   | 2.81E-10 | 0.007425 |
| 07Apr2011 | 5962  | 509.3   | -20.473  | 2 R.SSVIMLIV chr2@5767  | 7.41E-11 | 0.001172 |
| 07Apr2011 | 5908  | 509.8   | -23.773  | 2 R.SSVIMLIV chr2@5767  | 3.76E-11 | 2.42E-04 |
| 07Apr2011 | 7508  | 851.48  | -15.2578 | 2 K.RGVRLSH chr2@2789   | 2.71E-10 | 0.006573 |
| 07Apr2011 | 9248  | 858.47  | -5.67211 | 3 _LETGIKPI Splice@chr  | 2.08E-11 | 0        |
| 07Apr2011 | 9192  | 858.47  | -5.67211 | 3 _LETGIKPI Splice@chr  | 3.09E-10 | 0.008469 |
| 07Apr2011 | 6116  | 1051.15 | 14.87916 | 3 E.GGDWSH Splice@chr   | 5.33E-13 | 0        |
| 07Apr2011 | 6015  | 509.3   | -20.473  | 2 R.SSVIMLIV chr2@5767  | 6.56E-11 | 9.47E-04 |
| 07Apr2011 | 8683  | 618.32  | 9.392969 | 2 _ICSK+14.( chr2@7590  | 2.29E-11 | 7.19E-04 |
| 07Apr2011 | 12813 | 634.84  | 6.410455 | 2 R.VDIGDILF Splice@chr | 1.02E-12 | 0        |
| 07Apr2011 | 12218 | 1003.19 | 17.13413 | 3 R.CWNRRA Splice@chr   | 1.01E-11 | 2.56E-04 |
| 07Apr2011 | 3893  | 493.78  | -11.3951 | 2 R.KNQENLI Splice@chr  | 3.07E-10 | 0.009232 |
| 07Apr2011 | 5855  | 509.3   | -20.473  | 2 R.SSVIMLIV chr2@5767  | 6.56E-11 | 0.002294 |
| 07Apr2011 | 9729  | 833.43  | -7.18554 | 2 _IIEPYVAV Splice@chr  | 1.45E-10 | 0.004551 |
| 07Apr2011 | 5910  | 509.3   | -20.473  | 2 R.SSVIMLIV chr2@5767  | 6.56E-11 | 0.002294 |
| 07Apr2011 | 6022  | 509.3   | -20.473  | 2 R.SSVIMLIV chr2@5767  | 1.24E-10 | 0.003747 |
| 07Apr2011 | 5965  | 509.3   | -20.473  | 2 R.SSVIMLIV chr2@5767  | 7.34E-11 | 0.002697 |
| 07Apr2011 | 5801  | 509.3   | -20.473  | 2 R.SSVIMLIV chr2@5767  | 7.27E-11 | 0.002697 |
| 07Apr2011 | 12228 | 864.95  | 22.09183 | 2 R.KSSTLMR chr4@1659   | 1.12E-10 | 0.003548 |
| 07Apr2011 | 5961  | 1017.59 | -22.5744 | 1 R.SSVIMLIV chr2@5767  | 1.88E-11 | 7.19E-04 |
| 07Apr2011 | 7526  | 851.49  | -3.4814  | 2 K.RGVRLSH chr2@2789   | 1.21E-10 | 0.003747 |

|           |       |         |          |                                       |          |          |
|-----------|-------|---------|----------|---------------------------------------|----------|----------|
| 07Apr2011 | 9309  | 858.48  | 6.006088 | 3 _..LETGIHKP <sup>i</sup> Splice@chr | 8.49E-11 | 0.002697 |
| 07Apr2011 | 5847  | 1017.59 | -22.5744 | 1 R.SSVIMLIV chr2@5767                | 1.45E-10 | 0.004551 |
| 07Apr2011 | 6177  | 509.3   | -20.473  | 2 R.SSVIMLIV chr2@5767                | 9.27E-11 | 0.002086 |
| 07Apr2011 | 12183 | 864.95  | 22.09183 | 2 R.KSSTLMR chr4@1655                 | 3.26E-11 | 8.77E-04 |
| 07Apr2011 | 1155  | 562.31  | -13.4391 | 2 R.FYLLYLYK Splice@chr               | 4.99E-11 | 0.001072 |
| 07Apr2011 | 1871  | 493.61  | 28.00299 | 3 _..FQRHNL <sup>i</sup> chrX@1408    | 2.04E-11 | 2.28E-04 |
| 07Apr2011 | 9500  | 858.47  | -5.67211 | 3 _..LETGIHKP <sup>i</sup> Splice@chr | 5.69E-13 | 0        |
| 07Apr2011 | 6007  | 509.3   | -20.473  | 2 R.SSVIMLIV chr2@5767                | 6.56E-11 | 0.001686 |
| 07Apr2011 | 1915  | 493.94  | 19.04183 | 3 _..FQRHNL <sup>i</sup> chrX@1408    | 3.65E-11 | 8.77E-04 |
| 07Apr2011 | 6064  | 509.3   | -20.473  | 2 R.SSVIMLIV chr2@5767                | 6.48E-11 | 0.001686 |
| 07Apr2011 | 7651  | 671.37  | -24.0361 | 2 T.FNIVHTQ Splice@chr                | 3.50E-10 | 0.009656 |
| 07Apr2011 | 7609  | 851.49  | -3.4814  | 2 K.RGVRLSH chr2@2785                 | 1.18E-10 | 0.003493 |
| 07Apr2011 | 6120  | 509.3   | -20.473  | 2 R.SSVIMLIV chr2@5767                | 5.12E-11 | 0.001072 |
| 07Apr2011 | 9292  | 833.93  | -9.2006  | 2 _..IIEPYVAV Splice@chr              | 1.38E-10 | 0.004073 |
| 07Apr2011 | 9546  | 858.48  | 6.006088 | 3 _..LETGIHKP <sup>i</sup> Splice@chr | 4.51E-13 | 0        |
| 07Apr2011 | 1130  | 562.31  | -13.4391 | 2 R.FYLLYLYK Splice@chr               | 4.84E-11 | 0.001072 |
| 07Apr2011 | 12784 | 634.84  | 6.410455 | 2 R.VDIGDILF Splice@chr               | 1.66E-12 | 0        |
| 07Apr2011 | 4066  | 696.37  | -15.3603 | 2 _..LPTSPIGC chr5@1204               | 3.98E-10 | 0.007434 |
| 07Apr2011 | 1087  | 562.31  | -13.4391 | 2 R.FYLLYLYK Splice@chr               | 4.72E-11 | 7.03E-04 |
| 07Apr2011 | 3888  | 493.78  | -11.3951 | 2 R.KNQENLL Splice@chr                | 2.58E-10 | 0.004926 |
| 07Apr2011 | 1047  | 562.31  | -13.4391 | 2 R.FYLLYLYK Splice@chr               | 4.72E-11 | 7.03E-04 |
| 07Apr2011 | 9227  | 858.48  | 6.006088 | 3 _..LETGIHKP <sup>i</sup> Splice@chr | 4.43E-13 | 0        |
| 07Apr2011 | 7980  | 554.26  | 6.682444 | 2 R.M+15.99 Splice@chr                | 2.07E-10 | 0.003697 |
| 07Apr2011 | 9178  | 858.48  | 6.006088 | 3 _..LETGIHKP <sup>i</sup> Splice@chr | 6.52E-14 | 0        |
| 07Apr2011 | 6012  | 1017.59 | -22.5744 | 1 R.SSVIMLIV chr2@5767                | 1.88E-11 | 3.73E-04 |
| 07Apr2011 | 9040  | 833.93  | -9.2006  | 2 _..IIEPYVAV Splice@chr              | 4.01E-10 | 0.007434 |
| 07Apr2011 | 12831 | 634.84  | 6.410455 | 2 R.VDIGDILF Splice@chr               | 3.83E-13 | 0        |
| 07Apr2011 | 8987  | 833.93  | -9.2006  | 2 _..IIEPYVAV Splice@chr              | 4.75E-10 | 0.008552 |
| 07Apr2011 | 7929  | 554.26  | 6.682444 | 2 R.M+15.99 Splice@chr                | 1.21E-10 | 0.002326 |
| 07Apr2011 | 9181  | 835.92  | -2.26621 | 2 T.MRCVGK <sup>i</sup> chrX@1194     | 3.17E-10 | 0.00643  |
| 07Apr2011 | 9758  | 490.74  | -7.60235 | 2 K.DITMEIM chr3@1481                 | 2.64E-10 | 0.005079 |
| 07Apr2011 | 9478  | 554.26  | 6.682444 | 2 R.M+15.99 Splice@chr                | 4.67E-10 | 0.007002 |
| 07Apr2011 | 1417  | 562.31  | -13.4391 | 2 R.FYLLYLYK Splice@chr               | 4.81E-11 | 7.39E-04 |
| 07Apr2011 | 10842 | 858.47  | -5.67211 | 3 _..LETGIHKP <sup>i</sup> Splice@chr | 4.60E-12 | 0        |
| 07Apr2011 | 11787 | 1056.56 | 28.0642  | 3 I.SRVEDDS <sup>i</sup> Splice@chr   | 9.77E-14 | 0        |
| 07Apr2011 | 8883  | 851.48  | -15.2578 | 2 K.RGVRLSH chr2@2785                 | 2.82E-10 | 0.004522 |
| 07Apr2011 | 15009 | 634.84  | 6.410455 | 2 R.VDIGDILF Splice@chr               | 1.25E-11 | 1.54E-04 |
| 07Apr2011 | 11484 | 490.74  | -7.60235 | 2 K.DITMEIM chr3@1481                 | 5.49E-10 | 0.007458 |
| 07Apr2011 | 10893 | 858.47  | -5.67211 | 3 _..LETGIHKP <sup>i</sup> Splice@chr | 3.78E-12 | 0        |
| 07Apr2011 | 10845 | 836.42  | -4.27527 | 2 T.MRCVGK <sup>i</sup> chrX@1194     | 3.80E-10 | 0.005761 |
| 07Apr2011 | 7622  | 831.39  | -27.5413 | 2 K.KFTFEIEE chrX@1364                | 1.25E-11 | 1.54E-04 |
| 07Apr2011 | 10282 | 618.32  | 9.392969 | 2 _..ICSK+14.( chr2@7590              | 5.78E-10 | 0.007951 |
| 07Apr2011 | 10341 | 618.32  | 9.392969 | 2 _..ICSK+14.( chr2@7590              | 6.21E-11 | 0.001163 |
| 07Apr2011 | 1431  | 423.24  | -12.4437 | 2 R.RAPPTFR chr5@4235                 | 3.57E-10 | 0.00539  |
| 07Apr2011 | 1828  | 510.3   | 12.8833  | 2 R.RHVAVVF chr1@1479                 | 6.54E-12 | 1.54E-04 |
| 07Apr2011 | 5461  | 1025.61 | -11.6755 | 1 K.LGLGSG <sup>i</sup> chr5@4945     | 7.58E-12 | 1.54E-04 |
| 07Apr2011 | 8835  | 851.48  | -15.2578 | 2 K.RGVRLSH chr2@2785                 | 1.81E-10 | 0.002996 |

|           |       |         |          |                         |          |          |
|-----------|-------|---------|----------|-------------------------|----------|----------|
| 07Apr2011 | 11529 | 490.74  | -7.60235 | 2 K.DITMEIM chr3@1481   | 5.88E-10 | 0.00807  |
| 07Apr2011 | 7343  | 1051.14 | 5.269702 | 3 E.GGDWSH Splice@chr   | 2.45E-13 | 0        |
| 07Apr2011 | 10950 | 858.47  | -5.67211 | 3 _LETGIKPI Splice@chr  | 9.51E-12 | 1.54E-04 |
| 07Apr2011 | 8938  | 851.48  | -15.2578 | 2 K.RGVRLSH chr2@2785   | 1.74E-10 | 0.002996 |
| 07Apr2011 | 7926  | 851.49  | -3.4814  | 2 K.RGVRLSH chr2@2785   | 1.35E-10 | 0.003199 |
| 07Apr2011 | 6333  | 509.3   | -20.473  | 2 R.SSVIMLIV chr2@5767  | 5.45E-11 | 0.001426 |
| 07Apr2011 | 6293  | 1017.59 | -22.5744 | 1 R.SSVIMLIV chr2@5767  | 1.88E-11 | 1.88E-04 |
| 07Apr2011 | 9889  | 858.48  | 6.006088 | 3 _LETGIKPI Splice@chr  | 5.75E-12 | 0        |
| 07Apr2011 | 6276  | 509.3   | -20.473  | 2 R.SSVIMLIV chr2@5767  | 9.38E-11 | 0.001901 |
| 07Apr2011 | 4493  | 1025.62 | -1.90621 | 1 K.LGLGSL chr5@4945    | 1.23E-11 | 0        |
| 07Apr2011 | 976   | 562.31  | -13.4391 | 2 R.FYLLYLYK Splice@chr | 4.82E-11 | 0.001076 |
| 07Apr2011 | 1003  | 562.31  | -13.4391 | 2 R.FYLLYLYK Splice@chr | 5.37E-11 | 0.001426 |
| 07Apr2011 | 6238  | 1017.59 | -22.5744 | 1 R.SSVIMLIV chr2@5767  | 1.19E-10 | 0.002554 |
| 07Apr2011 | 7870  | 851.49  | -3.4814  | 2 K.RGVRLSH chr2@2785   | 1.79E-10 | 0.004131 |
| 07Apr2011 | 13351 | 864.95  | 22.09183 | 2 R.KSSTLMR chr4@1655   | 2.61E-10 | 0.006325 |
| 07Apr2011 | 6340  | 1051.15 | 14.87916 | 3 E.GGDWSH Splice@chr   | 1.72E-13 | 0        |
| 07Apr2011 | 6391  | 509.3   | -20.473  | 2 R.SSVIMLIV chr2@5767  | 7.92E-11 | 0.00174  |
| 07Apr2011 | 14075 | 634.84  | 6.410455 | 2 R.VDIGDILF Splice@chr | 3.41E-13 | 0        |
| 07Apr2011 | 9838  | 858.48  | 6.006088 | 3 _LETGIKPI Splice@chr  | 7.92E-12 | 0        |
| 07Apr2011 | 6220  | 509.3   | -20.473  | 2 R.SSVIMLIV chr2@5767  | 3.24E-11 | 5.47E-04 |
| 07Apr2011 | 9815  | 835.92  | -2.26621 | 2 T.MRCVGK chrX@1194    | 2.19E-10 | 0.005076 |
| 07Apr2011 | 6182  | 1017.59 | -22.5744 | 1 R.SSVIMLIV chr2@5767  | 1.88E-11 | 1.88E-04 |
| 07Apr2011 | 6165  | 509.3   | -20.473  | 2 R.SSVIMLIV chr2@5767  | 6.21E-11 | 0.00174  |
| 07Apr2011 | 11241 | 833.93  | -9.2006  | 2 _IIEPYVAV Splice@chr  | 1.66E-10 | 0.002031 |
| 07Apr2011 | 9457  | 851.48  | -15.2578 | 2 K.RGVRLSH chr2@2785   | 2.27E-11 | 3.05E-04 |
| 07Apr2011 | 9991  | 660.7   | 6.141439 | 3 R.KIANKW/ chr3@2521   | 2.30E-10 | 0.002398 |
| 07Apr2011 | 1464  | 562.31  | -13.4391 | 2 R.FYLLYLYK Splice@chr | 4.83E-11 | 8.60E-04 |
| 07Apr2011 | 10214 | 660.7   | 6.141439 | 3 R.KIANKW/ chr3@2521   | 2.25E-10 | 0.002398 |
| 07Apr2011 | 15289 | 864.95  | 22.09183 | 2 R.KSSTLMR chr4@1655   | 2.49E-10 | 0.002513 |
| 07Apr2011 | 7354  | 509.8   | -23.773  | 2 R.SSVIMLIV chr2@5767  | 3.76E-11 | 7.36E-04 |
| 07Apr2011 | 15250 | 864.94  | 10.49869 | 2 R.KSSTLMR chr4@1655   | 2.36E-11 | 3.05E-04 |
| 07Apr2011 | 7507  | 1051.14 | 5.269702 | 3 E.GGDWSH Splice@chr   | 1.16E-12 | 0        |
| 07Apr2011 | 7769  | 831.39  | -27.5413 | 2 K.KFTFEIEE chrX@1364  | 2.03E-11 | 3.05E-04 |
| 07Apr2011 | 17099 | 970.45  | -29.5364 | 3 _VACNKM Splice@chr    | 4.40E-10 | 0.007416 |
| 07Apr2011 | 7574  | 1051.14 | 5.269702 | 3 E.GGDWSH Splice@chr   | 7.11E-13 | 0        |
| 07Apr2011 | 1788  | 510.3   | 12.8833  | 2 R.RHVAYVF chr1@1479   | 1.31E-11 | 1.57E-04 |
| 07Apr2011 | 1428  | 562.31  | -13.4391 | 2 R.FYLLYLYK Splice@chr | 5.35E-11 | 8.60E-04 |
| 07Apr2011 | 16049 | 634.84  | 6.410455 | 2 R.VDIGDILF Splice@chr | 2.75E-13 | 0        |
| 07Apr2011 | 7410  | 509.8   | -23.773  | 2 R.SSVIMLIV chr2@5767  | 3.76E-11 | 7.36E-04 |
| 07Apr2011 | 11302 | 833.93  | -9.2006  | 2 _IIEPYVAV Splice@chr  | 2.42E-10 | 0.002513 |
| 07Apr2011 | 7469  | 509.3   | -20.473  | 2 R.SSVIMLIV chr2@5767  | 1.10E-10 | 0.001389 |
| 07Apr2011 | 7621  | 831.39  | -27.5413 | 2 K.KFTFEIEE chrX@1364  | 4.29E-10 | 0.007296 |
| 07Apr2011 | 10100 | 660.36  | -2.34506 | 3 R.KIANKW/ chr3@2521   | 3.25E-10 | 0.004681 |
| 07Apr2011 | 12085 | 490.74  | -7.60235 | 2 K.DITMEIM chr3@1481   | 1.05E-10 | 0.001389 |
| 07Apr2011 | 7529  | 509.3   | -20.473  | 2 R.SSVIMLIV chr2@5767  | 8.03E-11 | 0.001138 |
| 07Apr2011 | 7711  | 831.39  | -27.5413 | 2 K.KFTFEIEE chrX@1364  | 1.04E-10 | 0.001389 |
| 07Apr2011 | 7833  | 831.39  | -27.5413 | 2 K.KFTFEIEE chrX@1364  | 2.94E-11 | 6.02E-04 |

|           |       |         |          |                         |          |          |
|-----------|-------|---------|----------|-------------------------|----------|----------|
| 07Apr2011 | 2236  | 418.89  | -10.5715 | 3 R.ENFATKC chr5@5231   | 1.57E-10 | 0.002031 |
| 07Apr2011 | 11431 | 835.92  | -2.26621 | 2 T.MRCVGK chrX@1194    | 3.15E-10 | 0.004429 |
| 07Apr2011 | 1535  | 423.24  | -12.4437 | 2 R.RAPPTFR chr5@4235   | 1.87E-10 | 0.003344 |
| 07Apr2011 | 7458  | 1051.15 | 14.87916 | 3 E.GGDWSH Splice@chr   | 2.27E-12 | 0        |
| 07Apr2011 | 7512  | 1051.15 | 14.87916 | 3 E.GGDWSH Splice@chr   | 1.76E-13 | 0        |
| 07Apr2011 | 7737  | 831.39  | -27.5413 | 2 K.KFTFEIEE chrX@1364  | 1.19E-11 | 0        |
| 07Apr2011 | 7555  | 831.39  | -27.5413 | 2 K.KFTFEIEE chrX@1364  | 2.75E-10 | 0.005428 |
| 07Apr2011 | 2329  | 493.94  | 19.04183 | 3 _FQRHNL chrX@1408     | 1.71E-10 | 0.003073 |
| 07Apr2011 | 8967  | 851.49  | -3.4814  | 2 K.RGVRLSH chr2@2785   | 3.52E-10 | 0.006428 |
| 07Apr2011 | 12207 | 1056.56 | 28.0642  | 3 I.SRVEDDS Splice@chr  | 1.33E-13 | 0        |
| 07Apr2011 | 14727 | 864.95  | 22.09183 | 2 R.KSSTLMR chr4@1655   | 1.30E-10 | 0.002713 |
| 07Apr2011 | 11804 | 833.42  | -19.2103 | 2 _IIEPYVAV Splice@chr  | 4.97E-10 | 0.008531 |
| 07Apr2011 | 1564  | 562.31  | -13.4391 | 2 R.FYLLLYLK Splice@chr | 4.81E-11 | 3.03E-04 |
| 07Apr2011 | 11206 | 858.48  | 6.006088 | 3 _LETGIKPI Splice@chr  | 1.61E-12 | 0        |
| 07Apr2011 | 12313 | 1056.56 | 28.0642  | 3 I.SRVEDDS Splice@chr  | 1.44E-12 | 0        |
| 07Apr2011 | 9416  | 671.37  | -24.0361 | 2 T.FNIVHTQ Splice@chr  | 4.55E-10 | 0.008531 |
| 07Apr2011 | 12723 | 726.37  | -5.26116 | 2 R.NYIGIEN chr5@9105   | 2.80E-10 | 0.005428 |
| 07Apr2011 | 14663 | 1003.19 | 17.13413 | 3 R.CWNRRA Splice@chr   | 1.58E-12 | 0        |
| 07Apr2011 | 15523 | 634.84  | 6.410455 | 2 R.VDIGDILF Splice@chr | 4.69E-13 | 0        |
| 07Apr2011 | 1600  | 562.31  | -13.4391 | 2 R.FYLLLYLK Splice@chr | 4.75E-11 | 3.03E-04 |
| 07Apr2011 | 11114 | 836.42  | -4.27527 | 2 T.MRCVGK chrX@1194    | 1.67E-10 | 0.003073 |
| 07Apr2011 | 880   | 416.22  | -8.0358  | 3 R.VETFPVD chr1@1716   | 3.14E-10 | 0.005781 |
| 07Apr2011 | 11756 | 833.42  | -19.2103 | 2 _IIEPYVAV Splice@chr  | 6.80E-11 | 5.95E-04 |
| 07Apr2011 | 3650  | 785.4   | -3.9684  | 2 K.SVETENA Splice@chr  | 4.48E-11 | 3.03E-04 |
| 07Apr2011 | 7685  | 831.39  | -27.5413 | 2 K.KFTFEIEE chrX@1364  | 7.34E-12 | 0        |
| 07Apr2011 | 9610  | 554.26  | 6.682444 | 2 R.M+15.99 Splice@chr  | 1.54E-10 | 0.002963 |
| 07Apr2011 | 10297 | 1003.18 | 7.145987 | 3 R.CWNRRA Splice@chr   | 1.13E-11 | 0        |
| 07Apr2011 | 8037  | 858.48  | 6.006088 | 3 _LETGIKPI Splice@chr  | 6.53E-12 | 0        |
| 07Apr2011 | 10751 | 634.83  | -9.39461 | 2 R.VDIGDILF Splice@chr | 3.16E-13 | 0        |
| 07Apr2011 | 6584  | 851.49  | -3.4814  | 2 K.RGVRLSH chr2@2785   | 2.15E-10 | 0.003383 |
| 07Apr2011 | 5600  | 673.32  | -23.1345 | 4 _QVREMH Splice@chr    | 5.49E-10 | 0.008789 |
| 07Apr2011 | 9958  | 750.38  | -16.0136 | 2 V.SWQILFN Splice@chr  | 3.16E-10 | 0.005164 |
| 07Apr2011 | 5271  | 1017.59 | -22.5744 | 1 R.SSVIMLIV chr2@5767  | 1.19E-10 | 0.002386 |
| 07Apr2011 | 1662  | 493.61  | 28.00299 | 3 _FQRHNL chrX@1408     | 7.17E-11 | 0.001564 |
| 07Apr2011 | 10282 | 864.95  | 22.09183 | 2 R.KSSTLMR chr4@1655   | 2.71E-11 | 2.39E-04 |
| 07Apr2011 | 7821  | 833.93  | -9.2006  | 2 _IIEPYVAV Splice@chr  | 5.57E-10 | 0.009147 |
| 07Apr2011 | 10308 | 864.95  | 22.09183 | 2 R.KSSTLMR chr4@1655   | 1.25E-11 | 0        |
| 07Apr2011 | 1619  | 493.61  | 28.00299 | 3 _FQRHNL chrX@1408     | 6.26E-10 | 0.009711 |
| 07Apr2011 | 7863  | 833.93  | -9.2006  | 2 _IIEPYVAV Splice@chr  | 6.07E-10 | 0.009333 |
| 07Apr2011 | 6994  | 554.26  | 6.682444 | 2 R.M+15.99 Splice@chr  | 5.00E-10 | 0.008215 |
| 07Apr2011 | 9925  | 750.38  | -16.0136 | 2 V.SWQILFN Splice@chr  | 4.72E-10 | 0.008215 |
| 07Apr2011 | 8080  | 858.48  | 6.006088 | 3 _LETGIKPI Splice@chr  | 1.56E-11 | 0        |
| 07Apr2011 | 8748  | 1056.56 | 28.0642  | 3 I.SRVEDDS Splice@chr  | 8.44E-15 | 0        |
| 07Apr2011 | 7488  | 833.93  | -9.2006  | 2 _IIEPYVAV Splice@chr  | 1.66E-10 | 0.00262  |
| 07Apr2011 | 9813  | 750.38  | -16.0136 | 2 V.SWQILFN Splice@chr  | 9.64E-11 | 0.001583 |
| 07Apr2011 | 7261  | 580.66  | 3.439687 | 3 _LDLFEYSI chr3@2551   | 3.04E-10 | 0.004666 |
| 07Apr2011 | 10142 | 1003.19 | 17.13413 | 3 R.CWNRRA Splice@chr   | 8.26E-12 | 0        |

|           |       |         |          |                          |          |          |
|-----------|-------|---------|----------|--------------------------|----------|----------|
| 07Apr2011 | 10668 | 634.84  | 6.410455 | 2 R.VDIGDILF Splice@chr  | 2.91E-13 | 0        |
| 07Apr2011 | 6705  | 554.26  | 6.682444 | 2 R.M+15.99 Splice@chr   | 2.27E-10 | 0.003448 |
| 07Apr2011 | 10213 | 864.95  | 22.09183 | 2 R.KSSTLMR chr4@165     | 5.13E-11 | 9.41E-04 |
| 07Apr2011 | 2720  | 514.25  | -29.0158 | 2 R.QICAHSR chr1@885     | 3.04E-10 | 0.004666 |
| 07Apr2011 | 6664  | 554.26  | 6.682444 | 2 R.M+15.99 Splice@chr   | 4.36E-10 | 0.00708  |
| 07Apr2011 | 8140  | 833.42  | -19.2103 | 2 _..IIEPYVAV Splice@chr | 1.08E-10 | 0.001785 |
| 07Apr2011 | 9286  | 833.93  | -9.2006  | 2 _..IIEPYVAV Splice@chr | 3.73E-10 | 0.006106 |
| 07Apr2011 | 6642  | 831.39  | -27.5413 | 2 K.KFTFEIEE chrX@136    | 1.32E-11 | 1.82E-04 |
| 07Apr2011 | 3184  | 519.6   | -26.5197 | 3 K.IGSM+15 chr5@165     | 5.40E-10 | 0.008151 |
| 07Apr2011 | 6497  | 831.39  | -27.5413 | 2 K.KFTFEIEE chrX@136    | 8.02E-11 | 8.17E-04 |
| 07Apr2011 | 4719  | 1025.61 | -11.6755 | 1 K.LGLGSGS chr5@494     | 3.62E-12 | 0        |
| 07Apr2011 | 9463  | 835.92  | -2.26621 | 2 T.MRCVGK chrX@119      | 1.33E-10 | 0.001739 |
| 07Apr2011 | 9509  | 858.48  | 6.006088 | 3 _..LETGIKPI Splice@chr | 1.22E-12 | 0        |
| 07Apr2011 | 12615 | 864.95  | 22.09183 | 2 R.KSSTLMR chr4@165     | 1.00E-10 | 0.001119 |
| 07Apr2011 | 8353  | 660.37  | 12.83612 | 3 R.KIANKW/ chr3@252     | 2.39E-10 | 0.004122 |
| 07Apr2011 | 14170 | 970.45  | -29.5364 | 3 _..VACNKM Splice@chr   | 4.40E-10 | 0.006916 |
| 07Apr2011 | 8311  | 554.26  | 6.682444 | 2 R.M+15.99 Splice@chr   | 2.52E-10 | 0.004426 |
| 07Apr2011 | 6435  | 1051.15 | 14.87916 | 3 E.GGDWSH Splice@chr    | 1.95E-12 | 0        |
| 07Apr2011 | 1126  | 562.31  | -13.4391 | 2 R.FYLLYLYK Splice@chr  | 4.81E-11 | 6.75E-04 |
| 07Apr2011 | 13294 | 634.83  | -9.39461 | 2 R.VDIGDILF Splice@chr  | 3.46E-12 | 0        |
| 07Apr2011 | 10057 | 833.42  | -19.2103 | 2 _..IIEPYVAV Splice@chr | 4.71E-10 | 0.007049 |
| 07Apr2011 | 8260  | 554.26  | 6.682444 | 2 R.M+15.99 Splice@chr   | 4.38E-10 | 0.006916 |
| 07Apr2011 | 13800 | 634.84  | 6.410455 | 2 R.VDIGDILF Splice@chr  | 7.46E-14 | 0        |
| 07Apr2011 | 10059 | 858.48  | 6.006088 | 3 _..LETGIKPI Splice@chr | 4.22E-13 | 0        |
| 07Apr2011 | 8126  | 851.49  | -3.4814  | 2 K.RGVRLSH chr2@278     | 5.36E-10 | 0.008331 |
| 07Apr2011 | 6657  | 1051.15 | 14.87916 | 3 E.GGDWSH Splice@chr    | 1.05E-12 | 0        |
| 07Apr2011 | 4468  | 493.78  | -11.3951 | 2 R.KNQENLI Splice@chr   | 2.53E-10 | 0.005059 |
| 07Apr2011 | 1434  | 510.3   | 12.8833  | 2 R.RHVAYVF chr1@147     | 6.54E-12 | 0        |
| 07Apr2011 | 1929  | 493.61  | 28.00299 | 3 _..FQRHNL chrX@140     | 2.04E-10 | 0.003967 |
| 07Apr2011 | 6916  | 897.42  | -27.6753 | 3 _..QVREMH Splice@chr   | 4.84E-10 | 0.007813 |
| 07Apr2011 | 8157  | 671.37  | -24.0361 | 2 T.FNIVHTQ Splice@chr   | 1.99E-10 | 0.003967 |
| 07Apr2011 | 13764 | 634.84  | 6.410455 | 2 R.VDIGDILF Splice@chr  | 4.26E-13 | 0        |
| 07Apr2011 | 8215  | 671.37  | -24.0361 | 2 T.FNIVHTQ Splice@chr   | 1.53E-10 | 0.002986 |
| 07Apr2011 | 1140  | 562.31  | -13.4391 | 2 R.FYLLYLYK Splice@chr  | 4.82E-11 | 9.55E-04 |
| 07Apr2011 | 9965  | 836.42  | -4.27527 | 2 T.MRCVGK chrX@119      | 3.59E-10 | 0.006529 |
| 07Apr2011 | 10519 | 833.42  | -19.2103 | 2 _..IIEPYVAV Splice@chr | 4.18E-10 | 0.007045 |
| 07Apr2011 | 6832  | 831.4   | -15.4799 | 2 K.KFTFEIEE chrX@136    | 3.41E-12 | 0        |
| 07Apr2011 | 2061  | 493.61  | 28.00299 | 3 _..FQRHNL chrX@140     | 1.51E-10 | 0.002986 |
| 07Apr2011 | 6604  | 1051.15 | 14.87916 | 3 E.GGDWSH Splice@chr    | 2.93E-12 | 0        |
| 07Apr2011 | 8671  | 554.26  | 6.682444 | 2 R.M+15.99 Splice@chr   | 2.19E-10 | 0.004241 |
| 07Apr2011 | 8676  | 660.7   | 6.141439 | 3 R.KIANKW/ chr3@252     | 4.49E-10 | 0.007288 |
| 07Apr2011 | 10004 | 858.48  | 6.006088 | 3 _..LETGIKPI Splice@chr | 2.17E-11 | 3.39E-04 |
| 07Apr2011 | 1804  | 493.61  | 28.00299 | 3 _..FQRHNL chrX@140     | 3.17E-10 | 0.005854 |
| 07Apr2011 | 8076  | 851.49  | -3.4814  | 2 K.RGVRLSH chr2@278     | 1.61E-10 | 0.003118 |
| 07Apr2011 | 8190  | 851.48  | -15.2578 | 2 K.RGVRLSH chr2@278     | 2.17E-11 | 3.39E-04 |
| 07Apr2011 | 14635 | 970.45  | -29.5364 | 3 _..VACNKM Splice@chr   | 1.17E-10 | 0.002035 |
| 07Apr2011 | 1380  | 562.31  | -13.4391 | 2 R.FYLLYLYK Splice@chr  | 4.72E-11 | 9.94E-04 |

|           |       |         |          |                         |          |          |
|-----------|-------|---------|----------|-------------------------|----------|----------|
| 07Apr2011 | 9025  | 1128.04 | -2.03078 | 2 _IPSAVGY( Splice@chr  | 4.79E-12 | 3.69E-04 |
| 07Apr2011 | 5030  | 1025.61 | -11.6755 | 1 K.LGLGSGL chr5@4945   | 3.25E-11 | 8.45E-04 |
| 07Apr2011 | 10419 | 833.42  | -19.2103 | 2 _IIEPYVAV Splice@chr  | 3.58E-10 | 0.005132 |
| 07Apr2011 | 1729  | 510.3   | 12.8833  | 2 R.RHVAYVF chr1@1479   | 1.31E-11 | 5.37E-04 |
| 07Apr2011 | 4413  | 493.78  | -11.3951 | 2 R.KNQENLI Splice@chr  | 6.70E-10 | 0.009744 |
| 07Apr2011 | 1340  | 562.31  | -13.4391 | 2 R.FYLLYLYK Splice@chr | 4.72E-11 | 9.94E-04 |
| 07Apr2011 | 13773 | 634.84  | 6.410455 | 2 R.VDIGDILF Splice@chr | 5.34E-12 | 3.69E-04 |
| 07Apr2011 | 1927  | 594.8   | -20.0434 | 2 R.KMGIEAC chr2@1114   | 3.49E-10 | 0.005132 |
| 07Apr2011 | 10465 | 833.42  | -19.2103 | 2 _IIEPYVAV Splice@chr  | 3.49E-11 | 8.45E-04 |
| 07Apr2011 | 1684  | 510.3   | 12.8833  | 2 R.RHVAYVF chr1@1479   | 6.54E-12 | 3.69E-04 |
| 07Apr2011 | 9075  | 1128.04 | -2.03078 | 2 _IPSAVGY( Splice@chr  | 9.93E-13 | 0        |
| 07Apr2011 | 9718  | 833.93  | -9.2006  | 2 _IIEPYVAV Splice@chr  | 1.09E-10 | 0.002035 |
| 07Apr2011 | 8710  | 554.26  | 6.682444 | 2 R.M+15.99 Splice@chr  | 6.53E-10 | 0.009624 |
| 07Apr2011 | 13745 | 634.83  | -9.39461 | 2 R.VDIGDILF Splice@chr | 6.44E-13 | 0        |
| 07Apr2011 | 10253 | 744.39  | 26.99177 | 2 L.FTENLTT chr5@1256   | 3.20E-10 | 0.004719 |
| 07Apr2011 | 8759  | 554.26  | 6.682444 | 2 R.M+15.99 Splice@chr  | 5.37E-10 | 0.008163 |
| 07Apr2011 | 8510  | 1111.1  | -11.1063 | 2 R.LLM+15.5 chr4@3284  | 5.73E-10 | 0.008834 |
| 07Apr2011 | 9817  | 833.93  | -9.2006  | 2 _IIEPYVAV Splice@chr  | 3.31E-10 | 0.004864 |
| 07Apr2011 | 9994  | 858.48  | 6.006088 | 3 _LETGIKPI Splice@chr  | 1.15E-14 | 0        |
| 07Apr2011 | 9943  | 858.47  | -5.67211 | 3 _LETGIKPI Splice@chr  | 9.73E-13 | 0        |
| 07Apr2011 | 14618 | 970.45  | -29.5364 | 3 _VACNKM Splice@chr    | 4.13E-11 | 9.94E-04 |
| 07Apr2011 | 1209  | 562.31  | -13.4391 | 2 R.FYLLYLYK Splice@chr | 4.72E-11 | 8.39E-04 |
| 07Apr2011 | 8010  | 671.37  | -24.0361 | 2 T.FNIVHTQ Splice@chr  | 3.29E-10 | 0.006427 |
| 07Apr2011 | 8578  | 1128.05 | 6.854678 | 2 _IPSAVGY( Splice@chr  | 1.02E-12 | 0        |
| 07Apr2011 | 12973 | 634.84  | 6.410455 | 2 R.VDIGDILF Splice@chr | 2.12E-13 | 0        |
| 07Apr2011 | 7898  | 671.37  | -24.0361 | 2 T.FNIVHTQ Splice@chr  | 3.52E-10 | 0.006865 |
| 07Apr2011 | 8201  | 554.26  | 6.682444 | 2 R.M+15.99 Splice@chr  | 4.03E-10 | 0.007703 |
| 07Apr2011 | 13800 | 970.45  | -29.5364 | 3 _VACNKM Splice@chr    | 1.30E-10 | 0.001608 |
| 07Apr2011 | 9517  | 858.48  | 6.006088 | 3 _LETGIKPI Splice@chr  | 1.54E-13 | 0        |
| 07Apr2011 | 9752  | 744.39  | 26.99177 | 2 L.FTENLTT chr5@1256   | 1.32E-10 | 0.001608 |
| 07Apr2011 | 8627  | 1128.05 | 6.854678 | 2 _IPSAVGY( Splice@chr  | 1.06E-11 | 0        |
| 07Apr2011 | 13001 | 634.84  | 6.410455 | 2 R.VDIGDILF Splice@chr | 5.25E-13 | 0        |
| 07Apr2011 | 9716  | 833.42  | -19.2103 | 2 _IIEPYVAV Splice@chr  | 8.20E-11 | 9.91E-04 |
| 07Apr2011 | 12341 | 864.95  | 22.09183 | 2 R.KSSTLMR chr4@1655   | 1.89E-11 | 1.79E-04 |
| 07Apr2011 | 1247  | 562.31  | -13.4391 | 2 R.FYLLYLYK Splice@chr | 6.47E-11 | 8.39E-04 |
| 07Apr2011 | 7952  | 671.37  | -24.0361 | 2 T.FNIVHTQ Splice@chr  | 1.83E-10 | 0.002207 |
| 07Apr2011 | 6327  | 1051.15 | 14.87916 | 3 E.GGDWSH Splice@chr   | 1.04E-10 | 0.001304 |
| 07Apr2011 | 9467  | 858.48  | 6.006088 | 3 _LETGIKPI Splice@chr  | 7.47E-12 | 0        |
| 07Apr2011 | 5641  | 560.6   | -22.2499 | 3 _EMFSAA\ chr4@3419    | 1.59E-10 | 0.002067 |
| 07Apr2011 | 2115  | 493.61  | 28.00299 | 3 _FQRHNL chrX@1408     | 3.19E-10 | 0.006278 |
| 07Apr2011 | 1654  | 795.48  | -0.38412 | 1 K.LMLPPPK Splice@chr  | 5.22E-10 | 0.008641 |
| 07Apr2011 | 7841  | 671.37  | -24.0361 | 2 T.FNIVHTQ Splice@chr  | 2.87E-10 | 0.004625 |
| 07Apr2011 | 7735  | 671.37  | -24.0361 | 2 T.FNIVHTQ Splice@chr  | 5.47E-10 | 0.009073 |
| 07Apr2011 | 7785  | 671.37  | -24.0361 | 2 T.FNIVHTQ Splice@chr  | 5.15E-10 | 0.0085   |
| 07Apr2011 | 13289 | 1003.18 | 7.145987 | 3 R.CWNRRA Splice@chr   | 1.81E-10 | 0.00268  |
| 07Apr2011 | 7343  | 831.39  | -27.5413 | 2 K.KFTFEIEE chrX@1364  | 1.11E-10 | 0.001601 |
| 07Apr2011 | 4765  | 493.78  | -11.3951 | 2 R.KNQENLI Splice@chr  | 6.19E-10 | 0.009741 |

|           |       |         |          |                         |          |          |
|-----------|-------|---------|----------|-------------------------|----------|----------|
| 07Apr2011 | 8554  | 851.48  | -15.2578 | 2 K.RGVRLSH chr2@2785   | 2.51E-10 | 0.003325 |
| 07Apr2011 | 1490  | 562.31  | -13.4391 | 2 R.FYLLYLYK Splice@chr | 4.82E-11 | 9.15E-04 |
| 07Apr2011 | 1524  | 562.31  | -13.4391 | 2 R.FYLLYLYK Splice@chr | 4.82E-11 | 9.15E-04 |
| 07Apr2011 | 14001 | 634.84  | 6.410455 | 2 R.VDIGDILF Splice@chr | 4.27E-13 | 0        |
| 07Apr2011 | 9137  | 660.36  | -2.34506 | 3 R.KIANKW/ chr3@2521   | 2.46E-10 | 0.003325 |
| 07Apr2011 | 7286  | 831.39  | -27.5413 | 2 K.KFTFEIEE chrX@1364  | 4.69E-11 | 9.15E-04 |
| 07Apr2011 | 10346 | 835.92  | -2.26621 | 2 T.MRCVGK' chrX@1194   | 2.01E-10 | 0.002949 |
| 07Apr2011 | 12840 | 750.38  | -16.0136 | 2 V.SWQILFN Splice@chr  | 1.67E-10 | 0.002552 |
| 07Apr2011 | 7200  | 831.39  | -27.5413 | 2 K.KFTFEIEE chrX@1364  | 1.98E-10 | 0.002949 |
| 07Apr2011 | 10388 | 858.47  | -5.67211 | 3 _LETGIKPI Splice@chr  | 4.01E-12 | 0        |
| 07Apr2011 | 11279 | 1056.56 | 28.0642  | 3 I.SRVEDDS' Splice@chr | 6.23E-17 | 0        |
| 07Apr2011 | 10208 | 833.93  | -9.2006  | 2 _IIEPYVAV Splice@chr  | 4.38E-10 | 0.006993 |
| 07Apr2011 | 8612  | 851.48  | -15.2578 | 2 K.RGVRLSH chr2@2785   | 3.40E-10 | 0.005718 |
| 07Apr2011 | 7042  | 1051.15 | 14.87916 | 3 E.GGDWSH Splice@chr   | 1.68E-12 | 0        |
| 07Apr2011 | 1900  | 510.3   | 12.8833  | 2 R.RHVAYVF chr1@1479   | 1.35E-11 | 1.64E-04 |
| 07Apr2011 | 13364 | 864.95  | 22.09183 | 2 R.KSSTLMR chr4@1655   | 7.76E-11 | 0.001181 |
| 07Apr2011 | 10450 | 858.48  | 6.006088 | 3 _LETGIKPI Splice@chr  | 3.84E-12 | 0        |
| 07Apr2011 | 5349  | 1025.61 | -11.6755 | 1 K.LGLGSL chr5@4945    | 1.58E-11 | 3.25E-04 |
| 07Apr2011 | 14035 | 634.83  | -9.39461 | 2 R.VDIGDILF Splice@chr | 3.08E-13 | 0        |
| 07Apr2011 | 9079  | 554.26  | 6.682444 | 2 R.M+15.99 Splice@chr  | 1.44E-10 | 0.002552 |
| 07Apr2011 | 9238  | 1128.04 | -2.03078 | 2 _IPSAVGY' Splice@chr  | 6.85E-13 | 0        |
| 07Apr2011 | 6588  | 1051.15 | 14.87916 | 3 E.GGDWSH Splice@chr   | 1.24E-11 | 2.03E-04 |
| 07Apr2011 | 8828  | 554.26  | 6.682444 | 2 R.M+15.99 Splice@chr  | 4.04E-10 | 0.006931 |
| 07Apr2011 | 10690 | 833.43  | -7.18554 | 2 _IIEPYVAV Splice@chr  | 5.00E-11 | 0.00114  |
| 07Apr2011 | 10207 | 858.48  | 6.006088 | 3 _LETGIKPI Splice@chr  | 4.68E-12 | 0        |
| 07Apr2011 | 6831  | 831.39  | -27.5413 | 2 K.KFTFEIEE chrX@1364  | 8.29E-12 | 2.03E-04 |
| 07Apr2011 | 9161  | 1128.05 | 6.854678 | 2 _IPSAVGY' Splice@chr  | 4.27E-13 | 0        |
| 07Apr2011 | 7531  | 518.59  | -1.022   | 3 _FVVDGSS chr5@1240    | 1.35E-10 | 0.002133 |
| 07Apr2011 | 1236  | 562.31  | -13.4391 | 2 R.FYLLYLYK Splice@chr | 5.42E-11 | 0.00114  |
| 07Apr2011 | 4311  | 493.78  | -11.3951 | 2 R.KNQENLI Splice@chr  | 2.84E-10 | 0.005569 |
| 07Apr2011 | 8354  | 671.37  | -24.0361 | 2 T.FNIVHTQ Splice@chr  | 4.66E-10 | 0.007382 |
| 07Apr2011 | 10746 | 833.42  | -19.2103 | 2 _IIEPYVAV Splice@chr  | 2.80E-10 | 0.005416 |
| 07Apr2011 | 1202  | 562.31  | -13.4391 | 2 R.FYLLYLYK Splice@chr | 4.74E-11 | 0.00114  |
| 07Apr2011 | 9662  | 618.32  | 9.392969 | 2 _ICSK+14.( chr2@7590  | 3.39E-10 | 0.006169 |
| 07Apr2011 | 9984  | 833.93  | -9.2006  | 2 _IIEPYVAV Splice@chr  | 1.89E-10 | 0.003648 |
| 07Apr2011 | 8875  | 660.7   | 6.141439 | 3 R.KIANKW/ chr3@2521   | 3.53E-10 | 0.006169 |
| 07Apr2011 | 10127 | 836.42  | -4.27527 | 2 T.MRCVGK' chrX@1194   | 2.95E-10 | 0.005875 |
| 07Apr2011 | 13458 | 1003.19 | 17.13413 | 3 R.CWNRRA Splice@chr   | 7.62E-13 | 0        |
| 07Apr2011 | 10147 | 858.48  | 6.006088 | 3 _LETGIKPI Splice@chr  | 9.25E-11 | 0.002013 |
| 07Apr2011 | 10459 | 833.42  | -19.2103 | 2 _IIEPYVAV Splice@chr  | 3.29E-10 | 0.006025 |
| 07Apr2011 | 1544  | 510.3   | 12.8833  | 2 R.RHVAYVF chr1@1479   | 2.04E-10 | 0.003975 |
| 07Apr2011 | 8772  | 554.26  | 6.682444 | 2 R.M+15.99 Splice@chr  | 2.28E-10 | 0.004436 |
| 07Apr2011 | 10506 | 744.39  | 26.99177 | 2 L.FTENLTT' chr5@1256  | 5.28E-10 | 0.008775 |
| 07Apr2011 | 6691  | 831.39  | -27.5413 | 2 K.KFTFEIEE chrX@1364  | 5.18E-10 | 0.008623 |
| 07Apr2011 | 9181  | 618.32  | 9.392969 | 2 _ICSK+14.( chr2@7590  | 2.52E-10 | 0.003107 |
| 07Apr2011 | 7920  | 671.37  | -24.0361 | 2 T.FNIVHTQ Splice@chr  | 1.86E-10 | 0.002476 |
| 07Apr2011 | 8138  | 671.37  | -24.0361 | 2 T.FNIVHTQ Splice@chr  | 3.69E-10 | 0.004536 |

|           |       |         |          |                         |          |          |
|-----------|-------|---------|----------|-------------------------|----------|----------|
| 07Apr2011 | 4244  | 493.78  | -11.3951 | 2 R.KNQENLI Splice@chr  | 3.72E-10 | 0.004536 |
| 07Apr2011 | 12110 | 750.38  | -16.0136 | 2 V.SWQILFN Splice@chr  | 3.62E-10 | 0.004536 |
| 07Apr2011 | 8188  | 671.37  | -24.0361 | 2 T.FNIVHTQ Splice@chr  | 3.82E-10 | 0.004694 |
| 07Apr2011 | 9130  | 618.32  | 9.392969 | 2 _ICSK+14.( chr2@7590  | 4.12E-10 | 0.006004 |
| 07Apr2011 | 1233  | 562.31  | -13.4391 | 2 R.FYLLYLYK chr5@5138  | 1.98E-10 | 0.0028   |
| 07Apr2011 | 7972  | 671.37  | -24.0361 | 2 T.FNIVHTQ Splice@chr  | 2.77E-10 | 0.003763 |
| 07Apr2011 | 12651 | 864.95  | 22.09183 | 2 R.KSSTLMR chr4@1655   | 2.53E-11 | 5.90E-04 |
| 07Apr2011 | 6374  | 1051.48 | 10.55946 | 3 E.GGDWSH Splice@chr   | 1.31E-17 | 0        |
| 07Apr2011 | 8199  | 1111.11 | -2.0893  | 2 R.LLM+15.5 chr4@3284  | 6.68E-10 | 0.009051 |
| 07Apr2011 | 6429  | 1051.15 | 14.87916 | 3 E.GGDWSH Splice@chr   | 2.07E-13 | 0        |
| 07Apr2011 | 1188  | 562.31  | -13.4391 | 2 R.FYLLYLYK chr5@5138  | 1.94E-10 | 0.002649 |
| 07Apr2011 | 6608  | 831.4   | -15.4799 | 2 K.KFTFEIEE chrX@1364  | 3.89E-11 | 7.61E-04 |
| 07Apr2011 | 6665  | 831.39  | -27.5413 | 2 K.KFTFEIEE chrX@1364  | 2.82E-12 | 0        |
| 07Apr2011 | 8080  | 671.37  | -24.0361 | 2 T.FNIVHTQ Splice@chr  | 4.51E-10 | 0.006439 |
| 07Apr2011 | 9886  | 833.42  | -19.2103 | 2 _IIEPYVAV Splice@chr  | 8.70E-11 | 0.001102 |
| 07Apr2011 | 12755 | 769.88  | 4.842369 | 2 K.MSVMGL chr1@7641    | 3.17E-15 | 0        |
| 07Apr2011 | 3298  | 765.86  | -14.4436 | 2 R.CSK+14.C Splice@chr | 6.03E-10 | 0.008437 |
| 07Apr2011 | 8603  | 554.84  | -0.66123 | 2 L.LVDLALHI chrX@1544  | 4.23E-10 | 0.006479 |
| 07Apr2011 | 7410  | 554.84  | -0.66123 | 2 L.LVDLALHI chrX@1544  | 4.32E-10 | 0.00706  |
| 07Apr2011 | 17709 | 972     | -4.84008 | 4 K.FMCSIFE\ chr1@8175  | 1.97E-10 | 0.003475 |
| 07Apr2011 | 12693 | 1050.06 | -0.43554 | 2 K.NFFFGFL\ chr5@4567  | 2.11E-10 | 0.004393 |
| 07Apr2011 | 13033 | 644.01  | -16.492  | 3 I.VSWWDN Splice@chr   | 4.86E-10 | 0.008108 |
| 07Apr2011 | 14133 | 644.01  | -16.492  | 3 I.VSWWDN Splice@chr   | 6.61E-11 | 0.001274 |
| 07Apr2011 | 12131 | 644.01  | -16.492  | 3 I.VSWWDN Splice@chr   | 2.01E-10 | 0.004603 |
| 07Apr2011 | 12177 | 644.01  | -16.492  | 3 I.VSWWDN Splice@chr   | 3.11E-10 | 0.008197 |
| 07Apr2011 | 12083 | 644.01  | -16.492  | 3 I.VSWWDN Splice@chr   | 3.09E-10 | 0.008197 |
| 07Apr2011 | 11421 | 644.01  | -16.492  | 3 I.VSWWDN Splice@chr   | 3.14E-10 | 0.005846 |
| 07Apr2011 | 11985 | 644.01  | -16.492  | 3 I.VSWWDN Splice@chr   | 2.09E-10 | 0.003967 |
| 07Apr2011 | 12268 | 644.01  | -16.492  | 3 I.VSWWDN Splice@chr   | 3.20E-10 | 0.005875 |
| 07Apr2011 | 10082 | 859.44  | -29.7537 | 3 R.M+15.99 Splice@chr  | 2.87E-10 | 0.004666 |
| 07Apr2011 | 8567  | 637.35  | 21.38964 | 2 K.SAKLVM+ Splice@chr  | 4.61E-10 | 0.007616 |
| 07Apr2011 | 17138 | 945.47  | 18.20286 | 2 K.CSVCKLG chr5@4861   | 5.14E-10 | 0.009123 |
| 07Apr2011 | 1699  | 401.9   | 23.7513  | 3 R.RSRGSSG chr2@1222   | 1.70E-10 | 0.004551 |
| 07Apr2011 | 1964  | 401.89  | -1.11651 | 3 R.RSRGSSG chr2@1222   | 5.73E-10 | 0.008691 |
| 07Apr2011 | 14878 | 960.55  | 3.504387 | 1 R.GVRRCRF chr4@3035   | 2.60E-10 | 0.004926 |
| 07Apr2011 | 2487  | 423.26  | 5.212441 | 2 R.IYAPRPK. chr5@1885  | 3.51E-10 | 0.005262 |
| 07Apr2011 | 11074 | 938.46  | 22.50833 | 2 R.ECSQSDS chr2@8876   | 5.89E-10 | 0.009218 |
| 07Apr2011 | 11910 | 938.46  | 22.50833 | 2 R.ECSQSDS chr2@8876   | 5.07E-10 | 0.008001 |
| 07Apr2011 | 11012 | 938.46  | 22.50833 | 2 R.ECSQSDS chr2@8876   | 2.51E-10 | 0.003745 |
| 07Apr2011 | 11360 | 938.46  | 22.50833 | 2 R.ECSQSDS chr2@8876   | 3.06E-10 | 0.005781 |
| 07Apr2011 | 11305 | 938.46  | 22.50833 | 2 R.ECSQSDS chr2@8876   | 2.29E-10 | 0.003994 |
| 07Apr2011 | 8134  | 938.46  | 22.50833 | 2 R.ECSQSDS chr2@8876   | 2.29E-10 | 0.003535 |
| 07Apr2011 | 9699  | 938.46  | 22.50833 | 2 R.ECSQSDS chr2@8876   | 3.11E-10 | 0.005723 |
| 07Apr2011 | 9640  | 938.46  | 22.50833 | 2 R.ECSQSDS chr2@8876   | 5.04E-10 | 0.00759  |
| 07Apr2011 | 9737  | 938.46  | 22.50833 | 2 R.ECSQSDS chr2@8876   | 3.79E-10 | 0.004536 |
| 07Apr2011 | 9136  | 606.86  | 28.10799 | 2 R.VLPTVFY, chr5@1167  | 1.27E-11 | 3.36E-04 |
| 07Apr2011 | 8478  | 606.86  | 28.10799 | 2 R.VLPTVFY, chr5@1167  | 6.65E-10 | 0.009744 |

|           |       |         |          |                          |          |          |
|-----------|-------|---------|----------|--------------------------|----------|----------|
| 07Apr2011 | 4158  | 1005.57 | 18.34924 | 1 R.TVVNMA chrX@4082     | 1.52E-10 | 0.00256  |
| 07Apr2011 | 15419 | 971.51  | -24.1359 | 3 R.FQK+14.( Splice@chr  | 1.55E-10 | 0.002743 |
| 07Apr2011 | 13609 | 946.46  | -14.4347 | 2 K.KFCK+14. chr2@1439   | 1.44E-10 | 0.002852 |
| 07Apr2011 | 8095  | 558.63  | -21.136  | 3 R.KFWNVP chrX@1472     | 3.65E-10 | 0.005132 |
| 07Apr2011 | 7645  | 558.3   | -13.2154 | 3 R.KFWNVP chrX@1472     | 1.51E-10 | 0.002067 |
| 07Apr2011 | 4985  | 747.39  | -22.624  | 2 R.K+14.016 chrX@4728   | 1.02E-10 | 0.001916 |
| 07Apr2011 | 7297  | 761.42  | 1.888909 | 2 R.FLIDISCVI Splice@chr | 2.26E-10 | 0.003448 |
| 07Apr2011 | 12251 | 764.37  | -5.91669 | 4 K.MMCM+ Splice@chr     | 6.10E-11 | 0.001844 |
| 07Apr2011 | 16578 | 1047.87 | -6.35633 | 3 K.K+14.016 chrX@7897   | 4.09E-10 | 0.006268 |
| 07Apr2011 | 2213  | 463.3   | -2.70655 | 2 K.LTVIARPF chr3@1376   | 4.48E-10 | 0.007646 |
| 07Apr2011 | 2456  | 463.3   | -2.70655 | 2 K.LTVIARPF chr3@1376   | 2.44E-10 | 0.004388 |
| 07Apr2011 | 2046  | 520.28  | 4.06113  | 2 K.IMFQFQF chr5@6379    | 4.19E-10 | 0.006931 |
| 07Apr2011 | 5927  | 657.35  | -12.0889 | 2 K.FFK+14.0 chrX@6554   | 1.36E-10 | 0.001988 |
| 07Apr2011 | 14368 | 951.51  | -11.2833 | 3 _SKLIPLITS Splice@chr  | 1.64E-10 | 0.002876 |
| 07Apr2011 | 15969 | 934.48  | 16.93502 | 2 R.QFRQSGI chr5@4795    | 1.16E-10 | 0.002171 |
| 07Apr2011 | 13160 | 934.98  | 15.13805 | 2 R.QFRQSGI chr5@4795    | 3.27E-10 | 0.004416 |
| 07Apr2011 | 16124 | 577.62  | 20.9371  | 3 _VTDM+1! chrX@1655     | 3.88E-11 | 5.99E-04 |
| 07Apr2011 | 16874 | 577.62  | 20.9371  | 3 _VTDM+1! chrX@1655     | 3.54E-11 | 3.03E-04 |
| 07Apr2011 | 16842 | 577.62  | 20.9371  | 3 _VTDM+1! chrX@1655     | 3.93E-11 | 3.03E-04 |
| 07Apr2011 | 13953 | 577.62  | 20.9371  | 3 _VTDM+1! chrX@1655     | 2.14E-10 | 0.002663 |
| 07Apr2011 | 1387  | 643.81  | -29.5291 | 2 R.M+15.99 chr5@1877    | 5.97E-10 | 0.008955 |
| 07Apr2011 | 17791 | 790.4   | 14.24776 | 1 R.GGNKEEF chrX@1157    | 3.47E-10 | 0.006296 |
| 07Apr2011 | 12833 | 796.93  | 15.79732 | 4 K.RCSLDQL chrX@1540    | 3.64E-10 | 0.006951 |
| 07Apr2011 | 12778 | 796.93  | 15.79732 | 4 K.RCSLDQL chrX@1540    | 1.45E-10 | 0.002837 |
| 07Apr2011 | 5980  | 657.68  | -9.97612 | 3 K.AKSSETS chr2@5116    | 2.30E-10 | 0.003448 |
| 07Apr2011 | 2803  | 530.33  | 5.253554 | 2 R.ARTSNIRI chr3@7235   | 1.77E-10 | 0.003073 |
| 07Apr2011 | 12908 | 977     | -22.617  | 2 R.LDFRITLK chr5@1980   | 1.31E-10 | 0.002133 |
| 07Apr2011 | 3158  | 571.36  | 10.76628 | 2 R.KRKQGAI chr1@1385    | 1.50E-10 | 0.002951 |
| 07Apr2011 | 9225  | 503.96  | -12.6206 | 3 K.IFKNQPIF chr1@1442   | 4.73E-10 | 0.008531 |
| 07Apr2011 | 9098  | 724.06  | 2.506414 | 3 R.NELEVFK chr1@1385    | 3.16E-10 | 0.005027 |
| 07Apr2011 | 15666 | 711.37  | -16.5825 | 4 R.RLELFEN chr4@6846    | 2.27E-10 | 0.003325 |
| 07Apr2011 | 81    | 747.36  | -4.98843 | 1 K.EGEERK.k chr4@1241   | 1.87E-09 | 0        |
| 07Apr2011 | 6688  | 804.94  | 17.91762 | 2 K.KNFQDR chr2@4824     | 7.84E-11 | 9.91E-04 |
| 07Apr2011 | 12066 | 756.48  | 22.84049 | 2 R.QICKLPEI chr2@2089   | 4.03E-10 | 0.007727 |
| 07Apr2011 | 4070  | 847.44  | -29.1211 | 4 K.MFK+14. chrX@2230    | 9.18E-11 | 0.002697 |
| 07Apr2011 | 15513 | 1078.6  | -9.94391 | 2 R.LMNWK+ chr1@8578     | 4.32E-10 | 0.007814 |
| 07Apr2011 | 10344 | 753.96  | 0.162122 | 2 K.K+14.016 chr2@1375   | 3.80E-10 | 0.006146 |
| 07Apr2011 | 10286 | 753.95  | -13.1319 | 2 K.K+14.016 chr2@1375   | 5.80E-11 | 0.001145 |
| 07Apr2011 | 9825  | 753.96  | 0.162122 | 2 K.K+14.016 chr2@1375   | 1.35E-10 | 0.001761 |
| 07Apr2011 | 9780  | 753.96  | 0.162122 | 2 K.K+14.016 chr2@1375   | 1.97E-11 | 1.79E-04 |
| 07Apr2011 | 10740 | 754.46  | -2.06563 | 2 K.K+14.016 chr2@1375   | 6.44E-10 | 0.009983 |
| 07Apr2011 | 9964  | 753.96  | 0.162122 | 2 K.K+14.016 chr2@1375   | 1.60E-10 | 0.002144 |
| 07Apr2011 | 13564 | 809.11  | 19.47063 | 3 _AKNATKY chr1@3095     | 9.31E-12 | 0        |
| 07Apr2011 | 11794 | 1000.13 | 14.08931 | 2 K.VCSRLRI Splice@chr   | 2.72E-10 | 0.005298 |
| 07Apr2011 | 7365  | 583.82  | -28.5596 | 2 R.LVPITFS chr1@2422    | 3.27E-10 | 0.008681 |
| 07Apr2011 | 7753  | 583.83  | -11.3703 | 2 R.LVPITFS chr1@2422    | 1.97E-10 | 0.004603 |
| 07Apr2011 | 9052  | 583.82  | -28.5596 | 2 R.LVPITFS chr1@2422    | 2.23E-10 | 0.002398 |

|           |       |         |          |                         |          |          |
|-----------|-------|---------|----------|-------------------------|----------|----------|
| 07Apr2011 | 13408 | 781.97  | 27.72547 | 2 K.KLFGSGA chrX@1174   | 5.41E-10 | 0.008933 |
| 07Apr2011 | 15604 | 1022.64 | 4.642265 | 3 K.LGLGLGL chr5@2000   | 3.89E-11 | 8.45E-04 |
| 07Apr2011 | 1395  | 423.75  | 27.93815 | 2 K.TLLNNSG chr3@9245   | 2.62E-10 | 0.003565 |
| 07Apr2011 | 1419  | 423.75  | 27.93815 | 2 K.TLLNNSG chr3@9245   | 4.11E-10 | 0.007703 |
| 07Apr2011 | 2555  | 463.73  | -6.59518 | 2 R.TTADYTV chrX@9395   | 1.36E-10 | 0.002419 |
| 07Apr2011 | 2754  | 580.28  | -19.4922 | 2 R.TIYNAFS1 chr5@1596  | 2.41E-11 | 1.54E-04 |
| 07Apr2011 | 2154  | 580.28  | -19.4922 | 2 R.TIYNAFS1 Splice@chr | 1.82E-10 | 0.002953 |
| 07Apr2011 | 9690  | 1057.02 | 28.36511 | 2 R.DTDKWC Splice@chr   | 2.03E-10 | 0.004937 |
| 07Apr2011 | 3930  | 440.73  | -0.69402 | 2 R.IEASTGFF Splice@chr | 9.58E-11 | 0.00267  |
| 07Apr2011 | 15768 | 769.88  | -19.0515 | 4 _MSLIREK- chr3@1235   | 1.78E-10 | 0.004131 |
| 07Apr2011 | 6520  | 646.67  | -3.90727 | 3 K.TKRLNGS chrX@1090   | 4.69E-10 | 0.007382 |
| 07Apr2011 | 16219 | 713.68  | -6.48229 | 3 I.YSNTTNSI chr1@2335  | 6.41E-10 | 0.009309 |
| 07Apr2011 | 3657  | 459.6   | -4.25894 | 3 R.ADILGVR chr1@7601   | 2.68E-10 | 0.007834 |
| 07Apr2011 | 9216  | 776.39  | -17.396  | 2 R.K+14.016 chr3@3794  | 3.20E-10 | 0.009615 |
| 07Apr2011 | 7995  | 669.35  | -20.3327 | 2 _NCSKK+1 chr3@1116    | 3.14E-10 | 0.009232 |
| 07Apr2011 | 15039 | 876.39  | -6.29995 | 3 K.GCSSNLE chr2@8466   | 6.98E-11 | 0.001396 |
| 07Apr2011 | 11878 | 876.39  | -6.29995 | 3 K.GCSSNLE chr2@8466   | 9.86E-11 | 0.002909 |
| 07Apr2011 | 11911 | 876.39  | -6.29995 | 3 K.GCSSNLE chr2@8466   | 2.03E-10 | 0.004937 |
| 07Apr2011 | 14376 | 876.39  | -6.29995 | 3 K.GCSSNLE chr2@8466   | 3.29E-10 | 0.006039 |
| 07Apr2011 | 13207 | 876.39  | -6.29995 | 3 K.GCSSNLE chr2@8466   | 5.43E-10 | 0.008927 |
| 07Apr2011 | 6088  | 444.23  | 7.06905  | 3 K.TSGELSHI chr4@2396  | 1.59E-10 | 0.002466 |
| 07Apr2011 | 11494 | 1119.61 | -9.79754 | 2 K.FFYRK+14 chrX@1590  | 1.88E-10 | 0.003648 |
| 07Apr2011 | 12608 | 858.77  | 20.14632 | 3 _ETMKGFF chrX@1172    | 4.82E-11 | 0.001408 |
| 07Apr2011 | 16788 | 740.15  | -29.2195 | 4 R.K+14.016 chr5@1000  | 1.23E-10 | 0.002292 |
| 07Apr2011 | 16645 | 740.15  | -29.2195 | 4 R.K+14.016 chr5@1000  | 1.79E-10 | 0.002159 |
| 07Apr2011 | 16151 | 740.15  | -29.2195 | 4 R.K+14.016 chr5@1000  | 1.81E-10 | 0.003073 |
| 07Apr2011 | 7035  | 711.93  | 27.67758 | 4 R.SLRTKISA chr3@9317  | 2.48E-10 | 0.003325 |
| 07Apr2011 | 8723  | 728.44  | 1.470828 | 2 K.LNKNGGI chr2@2778   | 4.02E-13 | 0        |
| 07Apr2011 | 4987  | 432.22  | 0.107464 | 4 R.LSGSGKM chr5@2005   | 2.44E-10 | 0.002513 |
| 07Apr2011 | 7625  | 500.79  | -15.0339 | 2 K.PSLSQVL Splice@chr  | 1.95E-10 | 0.003545 |
| 07Apr2011 | 11079 | 745.47  | -1.18815 | 2 K.QVILNLFI chr1@4832  | 1.31E-10 | 0.001739 |
| 07Apr2011 | 9613  | 517     | -25.0578 | 4 R.VFEVSLG Splice@chr  | 2.49E-10 | 0.004938 |
| 07Apr2011 | 4408  | 517.96  | 18.96984 | 3 K.LICMKRSI Splice@chr | 1.26E-10 | 0.003686 |
| 07Apr2011 | 4074  | 493.28  | 9.299081 | 2 R.EPKNATC chr2@1056   | 3.84E-10 | 0.005885 |
| 07Apr2011 | 9909  | 654.34  | -18.1627 | 3 _QKLQSSS Splice@chr   | 1.39E-11 | 2.03E-04 |
| 07Apr2011 | 9409  | 654.34  | -18.1627 | 3 _QKLQSSS Splice@chr   | 6.47E-11 | 9.39E-04 |
| 07Apr2011 | 4384  | 434.24  | 13.9946  | 3 _RSNDQTI chr5@6378    | 9.91E-11 | 0.001746 |
| 07Apr2011 | 4325  | 434.24  | 13.9946  | 3 _RSNDQTI chr5@6378    | 1.76E-10 | 0.002759 |
| 07Apr2011 | 3998  | 434.24  | 13.9946  | 3 _RSNDQTI chr5@6378    | 3.23E-10 | 0.004416 |
| 07Apr2011 | 4053  | 434.24  | 13.9946  | 3 _RSNDQTI chr5@6378    | 6.39E-10 | 0.008427 |
| 07Apr2011 | 11101 | 653.89  | -28.8863 | 2 K.NKLLKSY5 chr3@1375  | 4.78E-10 | 0.007119 |
| 07Apr2011 | 10195 | 653.89  | -28.8863 | 2 K.NKLLKSY5 chr3@1375  | 2.39E-10 | 0.004798 |
| 07Apr2011 | 4469  | 608.3   | -9.42515 | 4 R.ESFNLNY chr3@9522   | 3.97E-10 | 0.006525 |
| 07Apr2011 | 12457 | 690.06  | -20.8836 | 3 K.ISKKIFGSI chrX@1720 | 3.71E-10 | 0.005632 |
| 07Apr2011 | 10936 | 690.06  | -20.8836 | 3 K.ISKKIFGSI chrX@1720 | 1.29E-10 | 0.001426 |
| 07Apr2011 | 11790 | 689.72  | -28.9491 | 3 K.ISKKIFGSI chrX@1720 | 3.96E-11 | 7.70E-04 |
| 07Apr2011 | 11731 | 653.89  | -9.62894 | 2 K.QINLKLQ chr2@1024   | 3.31E-10 | 0.004681 |

|           |       |         |          |                         |          |          |
|-----------|-------|---------|----------|-------------------------|----------|----------|
| 07Apr2011 | 11389 | 653.89  | -9.62894 | 2 K.QINLKLQ chr2@1024   | 1.37E-10 | 0.002837 |
| 07Apr2011 | 10101 | 653.89  | -9.62894 | 2 K.QINLKLQ chr2@1024   | 3.43E-10 | 0.005132 |
| 07Apr2011 | 4397  | 639.28  | -4.30427 | 3 R.AYSFMSS chrX@4976   | 2.57E-13 | 0        |
| 07Apr2011 | 4441  | 638.95  | 2.678909 | 3 R.AYSFMSS chrX@4976   | 6.42E-14 | 0        |
| 07Apr2011 | 4221  | 638.95  | 2.678909 | 3 R.AYSFMSS chrX@4976   | 1.70E-14 | 0        |
| 07Apr2011 | 4268  | 638.95  | 2.678909 | 3 R.AYSFMSS chrX@4976   | 3.70E-14 | 0        |
| 07Apr2011 | 13395 | 808.96  | -3.39942 | 4 _RPRRQLG Splice@chr   | 4.01E-11 | 2.42E-04 |
| 07Apr2011 | 16045 | 1113.58 | 13.04301 | 3 R.ELGPIDIL chr4@3717  | 1.59E-10 | 0.002963 |
| 07Apr2011 | 9994  | 516.31  | 23.5317  | 3 R.NIIFLMVI chrX@1294  | 1.22E-10 | 0.001627 |
| 07Apr2011 | 7253  | 883.92  | 7.051245 | 4 K.EDMQEL' Splice@chr  | 3.76E-10 | 0.006245 |
| 07Apr2011 | 2750  | 408.75  | 10.32876 | 4 R.FLSLNAG chr3@2888   | 1.53E-10 | 0.004256 |
| 07Apr2011 | 17621 | 982.18  | 4.976534 | 3 K.TIEHEDSI chrX@1011  | 2.38E-10 | 0.002513 |
| 07Apr2011 | 10925 | 1033.15 | 27.32086 | 2 K.NKKFSIIC chr4@9058  | 1.60E-10 | 0.0031   |
| 07Apr2011 | 12318 | 1059.82 | -11.3751 | 3 I.SRSAAMF Splice@chr  | 2.80E-15 | 0        |
| 07Apr2011 | 14089 | 1059.81 | -20.7519 | 3 I.SRSAAMF Splice@chr  | 5.19E-16 | 0        |
| 07Apr2011 | 11080 | 535.61  | -24.9644 | 3 _NDANLKI chr4@1065    | 2.54E-10 | 0.003743 |
| 07Apr2011 | 12085 | 1075.23 | -15.9088 | 3 R.K+14.016 chrX@1594  | 2.78E-10 | 0.008659 |
| 07Apr2011 | 4409  | 423.26  | 23.30279 | 2 K.LGAETVV chr2@6180   | 1.49E-10 | 0.002671 |
| 07Apr2011 | 4252  | 423.26  | 23.30279 | 2 K.LGAETVV chr2@6180   | 3.70E-10 | 0.007069 |
| 07Apr2011 | 3517  | 423.26  | 23.30279 | 2 K.LGAETVV chr2@6180   | 5.60E-10 | 0.009218 |
| 07Apr2011 | 4020  | 423.26  | 23.30279 | 2 K.LGAETVV chr2@6180   | 5.33E-10 | 0.008504 |
| 07Apr2011 | 3972  | 423.26  | 23.30279 | 2 K.LGAETVV chr2@6180   | 4.67E-10 | 0.007616 |
| 07Apr2011 | 4721  | 573.78  | -21.0986 | 2 K.TICIVCPQ Splice@chr | 2.49E-10 | 0.004772 |
| 07Apr2011 | 14413 | 962.46  | -26.3952 | 3 R.WFWGQI chr4@3030    | 2.25E-10 | 0.003613 |
| 07Apr2011 | 5938  | 1029.07 | 1.099911 | 2 R.ICKNSYP\ Splice@chr | 2.99E-10 | 0.007894 |
| 07Apr2011 | 7001  | 1029.07 | 1.099911 | 2 R.ICKNSYP\ Splice@chr | 3.62E-10 | 0.006951 |
| 07Apr2011 | 1897  | 548.28  | -5.99626 | 4 R.KVDK+14 chr3@5261   | 3.21E-10 | 0.005359 |
| 07Apr2011 | 1867  | 548.28  | -5.99626 | 4 R.KVDK+14 chr3@5261   | 2.54E-10 | 0.003535 |
| 07Apr2011 | 6174  | 829.89  | -16.1259 | 2 R.FEVFEIEC chr4@7295  | 2.40E-10 | 0.006177 |
| 07Apr2011 | 7514  | 829.89  | -16.1259 | 2 R.FEVFEIEC chr4@7295  | 3.71E-10 | 0.006071 |
| 07Apr2011 | 7500  | 830.39  | -18.1496 | 2 R.FEVFEIEC chr4@7295  | 5.72E-10 | 0.009251 |
| 07Apr2011 | 5374  | 830.39  | -18.1496 | 2 R.FEVFEIEC chr4@7295  | 4.47E-10 | 0.007872 |
| 07Apr2011 | 6530  | 829.89  | -16.1259 | 2 R.FEVFEIEC chr4@7295  | 4.88E-10 | 0.007328 |
| 07Apr2011 | 6640  | 829.89  | -16.1259 | 2 R.FEVFEIEC chr4@7295  | 2.97E-10 | 0.005577 |
| 07Apr2011 | 6852  | 830.39  | -18.1496 | 2 R.FEVFEIEC chr4@7295  | 5.95E-10 | 0.008955 |
| 07Apr2011 | 7208  | 829.89  | -16.1259 | 2 R.FEVFEIEC chr4@7295  | 5.50E-10 | 0.008758 |
| 07Apr2011 | 9897  | 578.36  | -17.6542 | 2 _K+14.016 Splice@chr  | 4.02E-10 | 0.007585 |
| 07Apr2011 | 10505 | 929.5   | -8.28264 | 2 _DTYYSNK chr2@6987    | 2.79E-10 | 0.005416 |
| 07Apr2011 | 8882  | 545.33  | 1.868846 | 3 K.RASGKSC chr1@1425   | 8.76E-11 | 0.001324 |
| 07Apr2011 | 1704  | 464.24  | -7.11495 | 2 K.ETSFSTKk chr4@8236  | 1.35E-10 | 0.002419 |
| 07Apr2011 | 1571  | 464.24  | -7.11495 | 2 K.ETSFSTKk chr4@8236  | 5.26E-10 | 0.008622 |
| 07Apr2011 | 1358  | 464.24  | -7.11495 | 2 K.ETSFSTKk chr4@8236  | 2.88E-10 | 0.004154 |
| 07Apr2011 | 1228  | 464.24  | -7.11495 | 2 K.ETSFSTKk chr4@8236  | 4.59E-10 | 0.00722  |
| 07Apr2011 | 12329 | 909.47  | 26.37016 | 3 R.K+14.016 chrX@1516  | 1.37E-10 | 0.002624 |
| 07Apr2011 | 4688  | 522.31  | -23.2988 | 2 C.PTLLPPLf chr2@1388  | 2.26E-10 | 0.005733 |
| 07Apr2011 | 4074  | 522.31  | -23.2988 | 2 C.PTLLPPLf chr2@1388  | 1.76E-10 | 0.002769 |
| 07Apr2011 | 5283  | 522.31  | -23.2988 | 2 C.PTLLPPLf chr2@1388  | 1.74E-10 | 0.002759 |

|           |       |         |          |                         |          |          |
|-----------|-------|---------|----------|-------------------------|----------|----------|
| 07Apr2011 | 5210  | 522.31  | -23.2988 | 2 C.PTLLPPLF chr2@1388  | 1.15E-10 | 0.002133 |
| 07Apr2011 | 5009  | 522.31  | -23.2988 | 2 C.PTLLPPLF chr2@1388  | 1.39E-10 | 0.001803 |
| 07Apr2011 | 6678  | 848.43  | -13.2523 | 1 R.SREMGLF chr4@8432   | 5.17E-10 | 0.008238 |
| 07Apr2011 | 9511  | 998.51  | 16.13248 | 2 K.FFFEKCKI chr2@1310  | 1.38E-10 | 0.002545 |
| 07Apr2011 | 8898  | 998.5   | 6.092443 | 2 K.FFFEKCKI chr2@1310  | 4.83E-10 | 0.007119 |
| 07Apr2011 | 1092  | 549.3   | 2.894294 | 2 K.PTKHGLN Splice@chr  | 5.57E-10 | 0.009307 |
| 07Apr2011 | 1061  | 549.3   | 2.894294 | 2 K.PTKHGLN Splice@chr  | 1.79E-10 | 0.002907 |
| 07Apr2011 | 5421  | 569.81  | -25.0014 | 2 K.LLNQLLH Splice@chr  | 3.22E-10 | 0.006278 |
| 07Apr2011 | 3355  | 447.23  | -22.0898 | 4 L.SK+14.01 chr4@7034  | 5.38E-10 | 0.008775 |
| 07Apr2011 | 10009 | 829.41  | 4.789104 | 2 R.MVDQIKI chr5@1875   | 2.13E-10 | 0.003325 |
| 07Apr2011 | 3695  | 620.85  | 23.40758 | 2 C.QLTALGA chr4@7065   | 4.61E-10 | 0.007983 |
| 07Apr2011 | 2532  | 620.85  | 23.40758 | 2 C.QLTALGA chr4@7065   | 4.18E-10 | 0.006875 |
| 07Apr2011 | 2499  | 620.85  | 23.40758 | 2 C.QLTALGA chr4@7065   | 2.89E-10 | 0.004666 |
| 07Apr2011 | 3193  | 620.85  | 23.40758 | 2 C.QLTALGA chr4@7065   | 2.94E-10 | 0.005577 |
| 07Apr2011 | 3383  | 620.85  | 23.40758 | 2 C.QLTALGA chr4@7065   | 4.33E-10 | 0.007266 |
| 07Apr2011 | 3335  | 620.85  | 23.40758 | 2 C.QLTALGA chr4@7065   | 4.45E-10 | 0.00739  |
| 07Apr2011 | 3309  | 620.85  | 23.40758 | 2 C.QLTALGA chr4@7065   | 3.04E-10 | 0.005875 |
| 07Apr2011 | 3407  | 620.85  | 23.40758 | 2 C.QLTALGA chr4@7065   | 2.54E-10 | 0.004934 |
| 07Apr2011 | 3260  | 620.85  | 23.40758 | 2 C.QLTALGA chr4@7065   | 9.06E-11 | 0.001102 |
| 07Apr2011 | 3173  | 620.85  | 23.40758 | 2 C.QLTALGA chr4@7065   | 3.58E-10 | 0.004536 |
| 07Apr2011 | 15779 | 860.69  | 14.08015 | 4 R.FQSAAIG Splice@chr  | 2.09E-12 | 0        |
| 07Apr2011 | 13717 | 1147.25 | 13.44098 | 3 R.FQSAAIG Splice@chr  | 4.80E-18 | 0        |
| 07Apr2011 | 13518 | 1147.25 | 13.44098 | 3 R.FQSAAIG Splice@chr  | 2.28E-17 | 0        |
| 07Apr2011 | 13522 | 860.69  | 14.08015 | 4 R.FQSAAIG Splice@chr  | 5.61E-13 | 0        |
| 07Apr2011 | 13527 | 1147.24 | 4.705638 | 3 R.FQSAAIG Splice@chr  | 6.88E-15 | 0        |
| 07Apr2011 | 13737 | 1147.25 | 13.44098 | 3 R.FQSAAIG Splice@chr  | 1.95E-14 | 0        |
| 07Apr2011 | 16043 | 1147.24 | 4.705638 | 3 R.FQSAAIG Splice@chr  | 9.63E-13 | 0        |
| 07Apr2011 | 15183 | 1147.24 | 4.705638 | 3 R.FQSAAIG Splice@chr  | 2.82E-13 | 0        |
| 07Apr2011 | 17206 | 1147.24 | 4.705638 | 3 R.FQSAAIG Splice@chr  | 1.07E-15 | 0        |
| 07Apr2011 | 17224 | 1147.24 | 4.705638 | 3 R.FQSAAIG Splice@chr  | 7.35E-13 | 0        |
| 07Apr2011 | 11349 | 1147.25 | 13.44098 | 3 R.FQSAAIG Splice@chr  | 6.03E-13 | 0        |
| 07Apr2011 | 14257 | 1147.24 | 4.705638 | 3 R.FQSAAIG Splice@chr  | 1.33E-13 | 0        |
| 07Apr2011 | 14808 | 860.69  | 14.08015 | 4 R.FQSAAIG Splice@chr  | 2.80E-12 | 0        |
| 07Apr2011 | 14796 | 1147.25 | 13.44098 | 3 R.FQSAAIG Splice@chr  | 3.42E-12 | 0        |
| 07Apr2011 | 14720 | 860.68  | 2.433027 | 4 R.FQSAAIG Splice@chr  | 1.01E-11 | 3.69E-04 |
| 07Apr2011 | 14716 | 1147.24 | 4.705638 | 3 R.FQSAAIG Splice@chr  | 2.14E-16 | 0        |
| 07Apr2011 | 13891 | 1147.25 | 13.44098 | 3 R.FQSAAIG Splice@chr  | 2.88E-16 | 0        |
| 07Apr2011 | 13909 | 1147.25 | 13.44098 | 3 R.FQSAAIG Splice@chr  | 2.66E-14 | 0        |
| 07Apr2011 | 14999 | 1147.24 | 4.705638 | 3 R.FQSAAIG Splice@chr  | 2.71E-14 | 0        |
| 07Apr2011 | 15018 | 1147.24 | 4.705638 | 3 R.FQSAAIG Splice@chr  | 5.70E-15 | 0        |
| 07Apr2011 | 6941  | 574.8   | 12.19222 | 2 R.WEVTSEI chr5@1925   | 3.94E-10 | 0.006013 |
| 07Apr2011 | 7103  | 574.8   | 12.19222 | 2 R.WEVTSEI chr5@1925   | 3.08E-10 | 0.005781 |
| 07Apr2011 | 5216  | 570.33  | 10.24926 | 2 K.QIHHSLYI Splice@chr | 1.23E-10 | 0.001519 |
| 07Apr2011 | 5668  | 679.32  | -27.147  | 2 K.M+15.99 chr1@1451   | 1.11E-10 | 0.002025 |
| 07Apr2011 | 3956  | 440.72  | 0.555229 | 2 _QGFTNW chr4@1025     | 4.59E-10 | 0.00722  |
| 07Apr2011 | 2879  | 507.99  | -29.675  | 4 K.LWYIYVYI chr4@1151  | 3.74E-10 | 0.006071 |
| 07Apr2011 | 2297  | 507.99  | -29.675  | 4 K.LWYIYVYI chr4@1151  | 9.52E-11 | 0.001119 |

|           |       |         |          |                         |          |          |
|-----------|-------|---------|----------|-------------------------|----------|----------|
| 07Apr2011 | 13741 | 1050.06 | -0.43554 | 2 K.NFFFGFL chr5@4567   | 3.63E-10 | 0.005793 |
| 07Apr2011 | 11214 | 1120.61 | -28.8921 | 2 _FNIFQIIII chr2@4355  | 9.11E-11 | 0.001583 |
| 07Apr2011 | 9567  | 544.8   | -6.50987 | 2 R.LPTYVPA chrX@1248   | 5.36E-10 | 0.008622 |
| 07Apr2011 | 8638  | 1088.6  | 0.673435 | 1 R.LPTYVPA chrX@1248   | 9.08E-11 | 0.001697 |
| 07Apr2011 | 10109 | 1106.51 | -25.9146 | 1 R.M+15.99 chr5@9235   | 3.50E-10 | 0.005177 |
| 07Apr2011 | 14771 | 913.98  | 5.31896  | 2 R.NYYFPSK Splice@chr  | 9.88E-11 | 0.001746 |
| 07Apr2011 | 6272  | 529.95  | -5.88728 | 3 K.VHIMFFL chr3@1008   | 5.64E-10 | 0.009146 |
| 07Apr2011 | 5707  | 545.33  | -13.7919 | 2 K.LQVFDKL chrX@7538   | 5.08E-10 | 0.008358 |
| 07Apr2011 | 2187  | 799.4   | 12.76691 | 2 _TK+14.01 chr3@7506   | 4.87E-10 | 0.007813 |
| 07Apr2011 | 7935  | 596.82  | -10.6096 | 2 K.SKLFSAFT Splice@chr | 6.61E-10 | 0.009744 |
| 07Apr2011 | 11286 | 772.99  | 26.56584 | 2 K.KKK+14.C chr5@4730  | 3.09E-10 | 0.004295 |
| 07Apr2011 | 9002  | 525.31  | 28.37637 | 2 K.IDNFAVT Splice@chr  | 4.37E-10 | 0.006836 |
| 07Apr2011 | 8553  | 525.31  | 28.37637 | 2 K.IDNFAVT Splice@chr  | 5.75E-10 | 0.009505 |
| 07Apr2011 | 13748 | 825.44  | -21.2216 | 2 K.SMKIFHG chr1@2832   | 6.22E-10 | 0.00923  |
| 07Apr2011 | 12358 | 881.97  | 6.136241 | 2 K.CAPRALI chr5@2668   | 4.39E-10 | 0.00706  |
| 07Apr2011 | 7512  | 827.77  | -14.6467 | 3 K.NNRKHTI chr5@2125   | 3.21E-10 | 0.005846 |
| 07Apr2011 | 8400  | 578.83  | 0.845038 | 2 R.LSLPQGC Splice@chr  | 1.53E-10 | 0.004551 |
| 07Apr2011 | 8328  | 578.83  | 0.845038 | 2 R.LSLPQGC Splice@chr  | 3.13E-10 | 0.006284 |
| 07Apr2011 | 9311  | 578.83  | 0.845038 | 2 R.LSLPQGC Splice@chr  | 3.05E-10 | 0.005875 |
| 07Apr2011 | 12564 | 1007.86 | 15.19559 | 3 R.CWNRRA Splice@chr   | 2.38E-11 | 1.79E-04 |
| 07Apr2011 | 3327  | 808.96  | 22.43678 | 2 R.ELESPRI Splice@chr  | 2.74E-10 | 0.003535 |
| 07Apr2011 | 11344 | 732.07  | 19.51873 | 3 R.ATDDWII Splice@chr  | 1.87E-10 | 0.004911 |
| 07Apr2011 | 11406 | 732.07  | 19.51873 | 3 R.ATDDWII Splice@chr  | 1.68E-10 | 0.003252 |
| 07Apr2011 | 11449 | 732.07  | 19.51873 | 3 R.ATDDWII Splice@chr  | 2.68E-10 | 0.00536  |
| 07Apr2011 | 13333 | 732.07  | 19.51873 | 3 R.ATDDWII Splice@chr  | 1.98E-11 | 1.54E-04 |
| 07Apr2011 | 14270 | 732.07  | 19.51873 | 3 R.ATDDWII Splice@chr  | 6.93E-11 | 8.60E-04 |
| 07Apr2011 | 13774 | 732.07  | 19.51873 | 3 R.ATDDWII Splice@chr  | 1.82E-10 | 0.003073 |
| 07Apr2011 | 11759 | 732.07  | 19.51873 | 3 R.ATDDWII Splice@chr  | 4.90E-11 | 6.75E-04 |
| 07Apr2011 | 12260 | 732.07  | 19.51873 | 3 R.ATDDWII Splice@chr  | 1.12E-11 | 0        |
| 07Apr2011 | 14841 | 928.54  | -25.2272 | 1 R.RKRPTNR chr5@1868   | 4.32E-10 | 0.008136 |
| 07Apr2011 | 15388 | 731.38  | 7.720612 | 3 R.FDSLVLV Splice@chr  | 3.26E-11 | 5.47E-04 |
| 07Apr2011 | 14469 | 980.55  | -18.6076 | 2 R.GQRQTN Splice@chr   | 5.56E-10 | 0.007576 |
| 07Apr2011 | 8089  | 655.31  | 0.235027 | 2 R.WRFGTG Splice@chr   | 1.17E-10 | 0.002182 |
| 07Apr2011 | 5775  | 848.46  | -20.861  | 2 K.SK+14.01 chr1@7749  | 1.32E-10 | 0.002477 |
| 07Apr2011 | 7731  | 770.4   | 8.614288 | 2 K.FFFLDAA chr4@1701   | 3.73E-10 | 0.005845 |
| 07Apr2011 | 6943  | 1056.64 | -19.6373 | 2 _KEKRSVG Splice@chr   | 5.04E-10 | 0.008622 |
| 07Apr2011 | 10719 | 854.92  | -17.9855 | 2 _KSFEVAIC Splice@chr  | 7.34E-13 | 0        |
| 07Apr2011 | 16002 | 945.46  | -19.2993 | 2 K.ETWERG chr5@4770    | 6.18E-11 | 0.001163 |
| 07Apr2011 | 14861 | 785.06  | -22.2115 | 3 _NLQGEAL chr5@5904    | 3.98E-10 | 0.006686 |
| 07Apr2011 | 12271 | 785.06  | -22.2115 | 3 _NLQGEAL chr5@5904    | 2.18E-10 | 0.003854 |
| 07Apr2011 | 1284  | 627.34  | -3.85057 | 2 R.GCKKPA chr5@1125    | 3.31E-10 | 0.006722 |
| 07Apr2011 | 1475  | 621.34  | 15.87034 | 1 R.AGHAHK chr5@1969    | 4.89E-10 | 0.007813 |
| 07Apr2011 | 4541  | 1116.65 | 11.05125 | 1 K.INLKVNSI chr2@7016  | 1.71E-10 | 0.00256  |
| 07Apr2011 | 6232  | 1116.65 | 11.05125 | 1 K.INLKVNSI chr2@7016  | 4.04E-10 | 0.006737 |
| 07Apr2011 | 6179  | 1116.65 | 11.05125 | 1 K.INLKVNSI chr2@7016  | 4.54E-10 | 0.007373 |
| 07Apr2011 | 5473  | 1116.66 | 20.02355 | 1 K.INLKVNSI chr2@7016  | 5.24E-10 | 0.00739  |
| 07Apr2011 | 18311 | 790.41  | -28.718  | 1 R.VGVEMV chr1@1372    | 4.14E-10 | 0.006362 |

|           |       |         |          |                         |          |          |
|-----------|-------|---------|----------|-------------------------|----------|----------|
| 07Apr2011 | 584   | 630.4   | -3.10472 | 1 K.LAVAGAK Splice@chr  | 2.54E-10 | 0.003743 |
| 07Apr2011 | 2200  | 850.46  | 2.874103 | 1 K.KGFANW chr1@451     | 3.20E-10 | 0.008495 |
| 07Apr2011 | 2757  | 850.46  | 2.874103 | 1 K.KGFANW chr1@451     | 5.33E-10 | 0.008775 |
| 07Apr2011 | 12890 | 962.47  | -24.1089 | 3 _LHLLDFV Splice@chr   | 1.73E-11 | 7.19E-04 |
| 07Apr2011 | 14343 | 812.11  | 2.033465 | 3 A.EITEMLP Splice@chr  | 6.81E-12 | 1.54E-04 |
| 07Apr2011 | 12908 | 675.88  | 3.39561  | 2 R.NQEFRRK chr5@360    | 8.20E-12 | 0        |
| 07Apr2011 | 12260 | 1193.21 | 8.703278 | 2 K.KKM+15. chrX@148    | 2.93E-10 | 0.007634 |
| 07Apr2011 | 12222 | 740.39  | -27.9007 | 4 R.VDGVK+1 Splice@chr  | 2.19E-10 | 0.004436 |
| 07Apr2011 | 10820 | 974.02  | -8.56562 | 2 E.LMENQV chr1@365     | 2.11E-10 | 0.005375 |
| 07Apr2011 | 4129  | 501.79  | -26.5691 | 2 K.TIQFGLV chrX@763    | 9.23E-11 | 0.001845 |
| 07Apr2011 | 4003  | 501.79  | -26.5691 | 2 K.TIQFGLV chrX@763    | 2.41E-11 | 7.19E-04 |
| 07Apr2011 | 11457 | 855.41  | -22.1447 | 2 _HVQEVAI Splice@chr   | 2.42E-10 | 0.003881 |
| 07Apr2011 | 7806  | 855.41  | -22.1447 | 2 _HVQEVAI Splice@chr   | 4.35E-10 | 0.007683 |
| 07Apr2011 | 15477 | 736.05  | -13.3738 | 3 K.NVLNVAI chrX@259    | 5.35E-10 | 0.008012 |
| 07Apr2011 | 16193 | 818.45  | 0.561653 | 2 K.RTIVSVR chrX@830    | 5.26E-10 | 0.009747 |
| 07Apr2011 | 6614  | 1020.52 | 21.21636 | 1 K.NRYFYEK chr1@119    | 2.91E-10 | 0.005742 |
| 07Apr2011 | 11863 | 1121.14 | 28.66216 | 2 M.PICKSQK chr2@104    | 7.56E-11 | 0.001375 |
| 07Apr2011 | 12699 | 611.35  | -26.7997 | 2 F.LLISVPFSI chr5@999  | 4.84E-10 | 0.007119 |
| 07Apr2011 | 13018 | 611.35  | -26.7997 | 2 F.LLISVPFSI chr5@999  | 6.18E-10 | 0.00973  |
| 07Apr2011 | 11163 | 611.35  | -26.7997 | 2 F.LLISVPFSI chr5@999  | 2.73E-10 | 0.005298 |
| 07Apr2011 | 3070  | 572.36  | 6.791326 | 2 R.LEKVGGM Splice@chr  | 4.82E-10 | 0.008679 |
| 07Apr2011 | 10744 | 738.9   | 4.880241 | 2 R.DQNFVK chr1@726     | 5.09E-10 | 0.008977 |
| 07Apr2011 | 2877  | 528.28  | -17.8262 | 2 _KDRKEHS chr4@170     | 3.89E-11 | 2.42E-04 |
| 07Apr2011 | 14598 | 839.15  | -21.7005 | 4 R.K+14.016 chr1@144   | 5.26E-10 | 0.007867 |
| 07Apr2011 | 2430  | 536.29  | -10.9462 | 2 _QVEFNPII Splice@chr  | 5.50E-11 | 4.51E-04 |
| 07Apr2011 | 1851  | 536.29  | -10.9462 | 2 _QVEFNPII Splice@chr  | 1.88E-10 | 0.003106 |
| 07Apr2011 | 1880  | 536.29  | -10.9462 | 2 _QVEFNPII Splice@chr  | 9.72E-11 | 0.001848 |
| 07Apr2011 | 2137  | 536.29  | -10.9462 | 2 _QVEFNPII Splice@chr  | 6.27E-10 | 0.00936  |
| 07Apr2011 | 1952  | 536.29  | -10.9462 | 2 _QVEFNPII Splice@chr  | 3.78E-10 | 0.006652 |
| 07Apr2011 | 1900  | 536.29  | -10.9462 | 2 _QVEFNPII Splice@chr  | 6.34E-10 | 0.008427 |
| 07Apr2011 | 726   | 452.23  | -1.48793 | 2 R.SGEPLSA: Splice@chr | 6.05E-11 | 4.75E-04 |
| 07Apr2011 | 756   | 452.23  | -1.48793 | 2 R.SGEPLSA: Splice@chr | 1.37E-10 | 0.00317  |
| 07Apr2011 | 780   | 452.23  | -1.48793 | 2 R.SGEPLSA: Splice@chr | 3.45E-11 | 7.19E-04 |
| 07Apr2011 | 756   | 452.23  | -1.48793 | 2 R.SGEPLSA: Splice@chr | 1.27E-10 | 0.003747 |
| 07Apr2011 | 808   | 452.23  | -1.48793 | 2 R.SGEPLSA: Splice@chr | 1.81E-10 | 0.00475  |
| 07Apr2011 | 805   | 452.23  | -1.48793 | 2 R.SGEPLSA: Splice@chr | 4.52E-11 | 0.001076 |
| 07Apr2011 | 826   | 452.23  | -1.48793 | 2 R.SGEPLSA: Splice@chr | 3.84E-11 | 7.26E-04 |
| 07Apr2011 | 780   | 452.23  | -1.48793 | 2 R.SGEPLSA: Splice@chr | 1.13E-10 | 0.002394 |
| 07Apr2011 | 895   | 452.23  | -1.48793 | 2 R.SGEPLSA: Splice@chr | 1.55E-10 | 0.002031 |
| 07Apr2011 | 920   | 452.23  | -1.48793 | 2 R.SGEPLSA: Splice@chr | 8.95E-11 | 0.001268 |
| 07Apr2011 | 953   | 452.23  | -1.48793 | 2 R.SGEPLSA: Splice@chr | 3.06E-10 | 0.004313 |
| 07Apr2011 | 10263 | 581.34  | -5.25861 | 2 K.FIAHQK+ chr3@104    | 4.68E-10 | 0.008552 |
| 07Apr2011 | 11255 | 581.35  | 11.88446 | 2 K.FIAHQK+ chr3@104    | 5.07E-10 | 0.008484 |
| 07Apr2011 | 3263  | 685.46  | 10.66576 | 2 R.QIAAK+1 chr3@372    | 4.83E-10 | 0.008142 |
| 07Apr2011 | 12707 | 764.63  | -19.3423 | 4 _FQISAYV chr5@173     | 5.54E-10 | 0.007699 |
| 07Apr2011 | 11956 | 665.76  | -15.9983 | 5 R.FPRPRNP Splice@chr  | 4.99E-10 | 0.007865 |
| 07Apr2011 | 10453 | 996.99  | -24.37   | 2 K.SHCRSRF chr5@450    | 2.35E-10 | 0.00432  |

|           |       |         |          |                         |          |          |
|-----------|-------|---------|----------|-------------------------|----------|----------|
| 07Apr2011 | 12916 | 996.49  | -22.685  | 2 K.SHCRSRF chr5@4504   | 3.01E-10 | 0.004054 |
| 07Apr2011 | 9019  | 996.99  | -24.37   | 2 K.SHCRSRF chr5@4504   | 7.09E-11 | 0.001564 |
| 07Apr2011 | 10738 | 996.49  | -22.685  | 2 K.SHCRSRF chr5@4504   | 2.27E-10 | 0.003991 |
| 07Apr2011 | 11593 | 996.49  | -22.685  | 2 K.SHCRSRF chr5@4504   | 2.74E-10 | 0.003718 |
| 07Apr2011 | 8586  | 719.39  | 2.976059 | 3 K.INEKSIPR chrX@1721  | 5.92E-10 | 0.008191 |
| 07Apr2011 | 7231  | 495.29  | 27.16687 | 2 K.IVGIVGEI chr4@4724  | 8.60E-11 | 0.001324 |
| 07Apr2011 | 5284  | 664.68  | -12.0524 | 3 K.NVSTDLI chr5@2049   | 2.76E-10 | 0.004327 |
| 07Apr2011 | 10146 | 1050.52 | 19.69654 | 2 R.M+15.99 chr4@1387   | 2.33E-10 | 0.004163 |
| 07Apr2011 | 8862  | 730.38  | -23.8587 | 3 K.DNVVNTI chr3@7825   | 4.85E-10 | 0.008108 |
| 07Apr2011 | 9489  | 730.38  | -23.8587 | 3 K.DNVVNTI chr3@7825   | 4.16E-10 | 0.006362 |
| 07Apr2011 | 9548  | 730.38  | -23.8587 | 3 K.DNVVNTI chr3@7825   | 3.26E-10 | 0.004695 |
| 07Apr2011 | 7733  | 730.38  | -23.8587 | 3 K.DNVVNTI chr3@7825   | 5.95E-10 | 0.008691 |
| 07Apr2011 | 8510  | 730.38  | -23.8587 | 3 K.DNVVNTI chr3@7825   | 2.81E-10 | 0.003718 |
| 07Apr2011 | 11720 | 576.37  | -8.27427 | 2 K.KLILPHFR chr2@4900  | 6.37E-10 | 0.009624 |
| 07Apr2011 | 6590  | 686.85  | 7.29748  | 2 _NLPRGST chr1@6515    | 5.29E-10 | 0.007867 |
| 07Apr2011 | 8978  | 945.95  | -25.2346 | 2 K.FSKKNMI chr4@1701   | 8.93E-11 | 0.001901 |
| 07Apr2011 | 8925  | 945.45  | -23.4585 | 2 K.FSKKNMI chr4@1701   | 1.46E-10 | 0.003519 |
| 07Apr2011 | 12638 | 982.04  | -9.7677  | 2 K.QRNLSK+ Splice@chr  | 5.14E-10 | 0.008623 |
| 07Apr2011 | 1325  | 808.96  | -17.2991 | 2 R.KKFKRRQ Splice@chr  | 2.64E-10 | 0.00464  |
| 07Apr2011 | 8266  | 552.26  | -29.3402 | 2 _ESNDIVD chrX@1184    | 4.77E-10 | 0.007781 |
| 07Apr2011 | 9826  | 718.05  | -6.78341 | 3 A.SRCPRRA Splice@chr  | 6.89E-11 | 0.00174  |
| 07Apr2011 | 3296  | 432.75  | 10.60282 | 2 R.VYQVLDK chr1@9136   | 4.91E-10 | 0.00759  |
| 07Apr2011 | 5008  | 771.39  | 2.218364 | 2 R.NFFKTPA chr3@1244   | 1.44E-11 | 0        |
| 07Apr2011 | 4696  | 693.87  | -6.6949  | 2 V.ICVAVGD chr5@1065   | 8.73E-11 | 0.001916 |
| 07Apr2011 | 3460  | 693.87  | -6.6949  | 2 V.ICVAVGD chr5@1065   | 9.75E-11 | 0.002086 |
| 07Apr2011 | 3410  | 693.87  | -6.6949  | 2 V.ICVAVGD chr5@1065   | 1.17E-10 | 0.003493 |
| 07Apr2011 | 3415  | 693.87  | -6.6949  | 2 V.ICVAVGD chr5@1065   | 1.62E-10 | 0.003835 |
| 07Apr2011 | 4518  | 693.87  | -6.6949  | 2 V.ICVAVGD chr5@1065   | 2.75E-10 | 0.003284 |
| 07Apr2011 | 4263  | 694.37  | -9.11584 | 2 V.ICVAVGD chr5@1065   | 3.47E-10 | 0.005058 |
| 07Apr2011 | 4646  | 693.87  | -6.6949  | 2 V.ICVAVGD chr5@1065   | 6.75E-12 | 0        |
| 07Apr2011 | 3834  | 693.87  | -6.6949  | 2 V.ICVAVGD chr5@1065   | 1.11E-10 | 0.001119 |
| 07Apr2011 | 3979  | 693.87  | -6.6949  | 2 V.ICVAVGD chr5@1065   | 2.09E-11 | 1.70E-04 |
| 07Apr2011 | 4029  | 693.87  | -6.6949  | 2 V.ICVAVGD chr5@1065   | 1.54E-10 | 0.002164 |
| 07Apr2011 | 4096  | 693.87  | -6.6949  | 2 V.ICVAVGD chr5@1065   | 5.55E-10 | 0.008716 |
| 07Apr2011 | 3876  | 693.87  | -6.6949  | 2 V.ICVAVGD chr5@1065   | 1.40E-10 | 0.001761 |
| 07Apr2011 | 3821  | 693.87  | -6.6949  | 2 V.ICVAVGD chr5@1065   | 1.08E-11 | 0        |
| 07Apr2011 | 12094 | 868.47  | -17.3524 | 2 L.FLWSK+1 chr2@1462   | 3.99E-10 | 0.005185 |
| 07Apr2011 | 10803 | 965.76  | 6.091444 | 4 R.K+14.016 chr5@2085  | 1.57E-10 | 0.002466 |
| 07Apr2011 | 4312  | 847.44  | -29.1211 | 4 K.MFK+14.1 chrX@2230  | 1.34E-10 | 0.001627 |
| 07Apr2011 | 14294 | 790.13  | -1.10818 | 3 _TSRNTVK chr1@2962    | 6.18E-11 | 0.001844 |
| 07Apr2011 | 6912  | 711.96  | -25.1942 | 5 K.RISK+14 chrX@1730   | 4.96E-10 | 0.00886  |
| 07Apr2011 | 1252  | 503.28  | -21.0222 | 2 K.RSLEYIPK chr1@1227  | 1.31E-10 | 0.002713 |
| 07Apr2011 | 1003  | 503.28  | -21.0222 | 2 K.RSLEYIPK chr1@1227  | 2.82E-10 | 0.005569 |
| 07Apr2011 | 2812  | 576.79  | 21.06243 | 2 K.QNGESA\ chrX@4435   | 5.99E-11 | 8.60E-04 |
| 07Apr2011 | 7141  | 586.34  | 11.36604 | 2 R.LVILFFLF( chr2@6458 | 6.36E-10 | 0.009334 |
| 07Apr2011 | 7264  | 586.34  | 11.36604 | 2 R.LVILFFLF( chr2@6458 | 5.83E-10 | 0.008834 |
| 07Apr2011 | 7266  | 586.34  | 11.36604 | 2 R.LVILFFLF( chr2@6458 | 4.05E-10 | 0.006931 |

|           |       |         |          |                          |          |          |
|-----------|-------|---------|----------|--------------------------|----------|----------|
| 07Apr2011 | 3104  | 560.97  | -7.77518 | 3 K.K+14.016 chrX@1071   | 4.79E-10 | 0.007328 |
| 07Apr2011 | 3165  | 560.97  | -7.77518 | 3 K.K+14.016 chrX@1071   | 2.86E-10 | 0.005608 |
| 07Apr2011 | 3184  | 560.97  | -7.77518 | 3 K.K+14.016 chrX@1071   | 5.46E-10 | 0.008927 |
| 07Apr2011 | 12090 | 576.37  | -16.8666 | 2 K.IKILHVSTI Splice@chr | 3.92E-10 | 0.00636  |
| 07Apr2011 | 357   | 549.29  | -19.7752 | 2 K.FRVQYQC Splice@chr   | 3.66E-10 | 0        |
| 07Apr2011 | 491   | 549.29  | -19.7752 | 2 K.FRVQYQC Splice@chr   | 1.52E-10 | 0.002144 |
| 07Apr2011 | 13233 | 755.73  | 1.214553 | 3 K.KKRFRQC chr1@9965    | 1.16E-10 | 0.002363 |
| 07Apr2011 | 5984  | 1063.58 | 1.14882  | 1 K.YLINGNEI chr1@8687   | 1.75E-10 | 0.002996 |
| 07Apr2011 | 6132  | 1063.58 | 1.14882  | 1 K.YLINGNEI chr1@8687   | 2.96E-11 | 3.03E-04 |
| 07Apr2011 | 5263  | 512.27  | 9.502328 | 2 R.ICTTATID chr5@1130   | 2.02E-10 | 0.003383 |
| 07Apr2011 | 5064  | 512.27  | 9.502328 | 2 R.ICTTATID chr5@1130   | 7.24E-11 | 0.001375 |
| 07Apr2011 | 5116  | 512.27  | 9.502328 | 2 R.ICTTATID chr5@1130   | 5.07E-11 | 9.41E-04 |
| 07Apr2011 | 6743  | 512.27  | 9.502328 | 2 R.ICTTATID chr5@1130   | 1.76E-10 | 0.002759 |
| 07Apr2011 | 2755  | 741.39  | -17.2291 | 2 K.QKSNWH chr5@1229     | 6.30E-11 | 8.39E-04 |
| 07Apr2011 | 15319 | 795.42  | -12.1903 | 3 R.PEK+14.0 chr2@9629   | 2.62E-10 | 0.00451  |
| 07Apr2011 | 15450 | 795.75  | -17.798  | 3 R.PEKRK+1 chr2@9629    | 3.49E-11 | 5.15E-04 |
| 07Apr2011 | 15581 | 978.95  | 27.82589 | 3 K.TRFFVEIL chr3@1319   | 9.82E-11 | 0.001746 |
| 07Apr2011 | 7093  | 527.59  | 5.486348 | 3 R.TQTIHNF chr4@1490    | 5.48E-10 | 0.008455 |
| 07Apr2011 | 6877  | 527.59  | 5.486348 | 3 R.TQTIHNF chr4@1490    | 3.90E-10 | 0.004858 |
| 07Apr2011 | 17369 | 581.95  | -26.8252 | 3 R.VKSEHQI chr4@1532    | 3.66E-10 | 0.005915 |
| 07Apr2011 | 17289 | 581.95  | -26.8252 | 3 R.VKSEHQI chr4@1532    | 3.93E-10 | 0.006565 |
| 07Apr2011 | 14856 | 581.95  | -26.8252 | 3 R.VKSEHQI chr4@1532    | 3.76E-10 | 0.006529 |
| 07Apr2011 | 7932  | 573.33  | 27.62175 | 2 _FDAPLINI chr5@1947    | 1.20E-10 | 0.002171 |
| 07Apr2011 | 5425  | 628.32  | 10.85905 | 2 R.ISYQAMA Splice@chr   | 3.59E-10 | 0.009939 |
| 07Apr2011 | 6740  | 628.32  | 10.85905 | 2 R.ISYQAMA Splice@chr   | 3.72E-10 | 0.006071 |
| 07Apr2011 | 6801  | 628.32  | 10.85905 | 2 R.ISYQAMA Splice@chr   | 2.20E-10 | 0.002398 |
| 07Apr2011 | 4597  | 628.32  | 10.85905 | 2 R.ISYQAMA Splice@chr   | 3.12E-10 | 0.005086 |
| 07Apr2011 | 5837  | 628.32  | 10.85905 | 2 R.ISYQAMA Splice@chr   | 5.25E-10 | 0.007867 |
| 07Apr2011 | 5996  | 628.32  | 10.85905 | 2 R.ISYQAMA Splice@chr   | 4.37E-10 | 0.00706  |
| 07Apr2011 | 4835  | 567.94  | -0.93304 | 3 R.QTIWGS5 chr1@7775    | 4.62E-10 | 0.007542 |
| 07Apr2011 | 11082 | 1050.89 | 7.518881 | 3 K.M+15.99 chrX@6072    | 2.56E-10 | 0.006143 |
| 07Apr2011 | 11604 | 1014.53 | -19.5771 | 3 R.CYRYIIVS chr5@1927   | 4.43E-10 | 0.007872 |
| 07Apr2011 | 7421  | 1019.2  | 14.81211 | 3 R.TSKALIKY Splice@chr  | 1.73E-10 | 0.003118 |
| 07Apr2011 | 2944  | 504.77  | -1.93834 | 2 _RSCTVKEI chr5@1035    | 6.63E-10 | 0.009744 |
| 07Apr2011 | 10801 | 963.49  | -20.9897 | 2 _KVVLTG chr3@9528      | 5.19E-10 | 0.008248 |
| 07Apr2011 | 14859 | 865.93  | -28.7708 | 2 _EHPRPIAI Splice@chr   | 4.71E-11 | 9.55E-04 |
| 07Apr2011 | 15899 | 925.2   | -6.58882 | 4 _STEWIKFI Splice@chr   | 2.64E-10 | 0.004004 |
| 07Apr2011 | 17754 | 890.43  | -20.906  | 2 R.NSEIMNC chr5@1122    | 4.90E-12 | 0        |
| 07Apr2011 | 11243 | 754.97  | 28.31398 | 2 _KIK+14.0: chr5@1746   | 2.77E-10 | 0.004024 |
| 07Apr2011 | 7574  | 500.79  | -4.15218 | 2 _GQIRGSA Splice@chr    | 4.33E-10 | 0.008136 |
| 07Apr2011 | 6941  | 769.38  | -21.7645 | 4 R.FVVLSQC chr3@5037    | 2.66E-10 | 0.003033 |
| 07Apr2011 | 6058  | 848.46  | -18.4373 | 2 _KAEGKIG chr3@7158     | 5.68E-10 | 0.008691 |
| 07Apr2011 | 12778 | 886.77  | -29.5706 | 3 G.FLFKSLC\ chr2@9496   | 3.16E-10 | 0.004719 |
| 07Apr2011 | 15023 | 780.38  | 8.849474 | 4 _FVALRTM Splice@chr    | 5.24E-10 | 0.007891 |
| 07Apr2011 | 15093 | 1034.64 | 15.11683 | 3 R.IRRRPIRS Splice@chr  | 1.77E-10 | 0.002803 |
| 07Apr2011 | 8485  | 586.34  | -13.4512 | 2 R.LLVIFYTI Splice@chr  | 2.01E-10 | 0.003278 |
| 07Apr2011 | 9842  | 605.88  | -1.21087 | 2 R.ARLHLGF chr1@1339    | 5.34E-10 | 0.009557 |

|           |       |         |          |                         |          |          |
|-----------|-------|---------|----------|-------------------------|----------|----------|
| 07Apr2011 | 10073 | 1034.07 | -0.82714 | 2 K.FK+14.01 Splice@chr | 2.35E-11 | 4.50E-04 |
| 07Apr2011 | 14184 | 1026.19 | -15.4636 | 3 A.STNM+1! chr5@8882   | 1.11E-10 | 0.002035 |
| 07Apr2011 | 14299 | 870.82  | -4.77157 | 3 R.NFATFICf chr4@6412  | 6.10E-11 | 0.001247 |
| 07Apr2011 | 6239  | 605.33  | 25.8288  | 2 R.NYTEAIR\ chrX@1695  | 3.27E-10 | 0.009476 |
| 07Apr2011 | 10101 | 1028.99 | -16.6017 | 2 R.SQMDILC chrX@1395   | 5.19E-11 | 6.81E-04 |
| 07Apr2011 | 12824 | 1028.98 | -26.3436 | 2 R.SQMDILC chrX@1395   | 5.03E-10 | 0.007891 |
| 07Apr2011 | 1415  | 493.8   | 25.01949 | 2 R.KTFSTKf\ Splice@chr | 4.17E-10 | 0.006931 |
| 07Apr2011 | 12403 | 672.59  | -4.41756 | 5 R.KVSNVQ\ chr5@8812   | 1.12E-10 | 0.001119 |
| 07Apr2011 | 13150 | 672.58  | -19.3267 | 5 R.KVSNVQ\ chr5@8812   | 5.65E-10 | 0.009146 |
| 07Apr2011 | 2757  | 512     | 16.32434 | 3 K.K+14.016 chrX@1261  | 1.00E-10 | 0.001746 |
| 07Apr2011 | 4820  | 677.95  | 22.60469 | 2 R.QLKVIGR chrX@3498   | 3.64E-11 | 8.45E-04 |
| 07Apr2011 | 4568  | 677.95  | 22.60469 | 2 R.QLKVIGR chrX@3498   | 8.82E-11 | 0.001102 |
| 07Apr2011 | 1224  | 420.68  | -22.1784 | 2 R.MMTGTc chrX@9534    | 1.03E-11 | 0        |
| 07Apr2011 | 742   | 420.68  | -22.1784 | 2 R.MMTGTc chrX@9534    | 5.86E-12 | 0        |
| 07Apr2011 | 794   | 420.68  | -22.1784 | 2 R.MMTGTc chrX@9534    | 2.99E-11 | 2.42E-04 |
| 07Apr2011 | 766   | 420.68  | -22.1784 | 2 R.MMTGTc chrX@9534    | 1.99E-11 | 7.19E-04 |
| 07Apr2011 | 793   | 420.68  | -22.1784 | 2 R.MMTGTc chrX@9534    | 4.93E-12 | 2.28E-04 |
| 07Apr2011 | 857   | 420.68  | -22.1784 | 2 R.MMTGTc chrX@9534    | 2.40E-11 | 4.50E-04 |
| 07Apr2011 | 737   | 420.68  | -22.1784 | 2 R.MMTGTc chrX@9534    | 2.42E-11 | 5.51E-04 |
| 07Apr2011 | 781   | 420.68  | -22.1784 | 2 R.MMTGTc chrX@9534    | 1.96E-11 | 3.73E-04 |
| 07Apr2011 | 1028  | 420.68  | -22.1784 | 2 R.MMTGTc chrX@9534    | 3.90E-12 | 0        |
| 07Apr2011 | 652   | 420.68  | -22.1784 | 2 R.MMTGTc chrX@9534    | 4.23E-12 | 0        |
| 07Apr2011 | 1034  | 420.68  | -22.1784 | 2 R.MMTGTc chrX@9534    | 2.22E-11 | 3.05E-04 |
| 07Apr2011 | 815   | 420.68  | -22.1784 | 2 R.MMTGTc chrX@9534    | 2.62E-11 | 5.15E-04 |
| 07Apr2011 | 822   | 420.68  | -22.1784 | 2 R.MMTGTc chrX@9534    | 2.52E-12 | 0        |
| 07Apr2011 | 982   | 420.68  | -22.1784 | 2 R.MMTGTc chrX@9534    | 2.66E-11 | 8.45E-04 |
| 07Apr2011 | 901   | 420.68  | -22.1784 | 2 R.MMTGTc chrX@9534    | 3.70E-12 | 0        |
| 07Apr2011 | 946   | 420.68  | -22.1784 | 2 R.MMTGTc chrX@9534    | 2.33E-12 | 0        |
| 07Apr2011 | 15036 | 432.87  | -13.1521 | 3 R.SETNSDK chr4@8262   | 5.56E-11 | 8.17E-04 |
| 07Apr2011 | 4432  | 546.99  | -11.2534 | 3 K.VLTSLPc\ chr5@3595  | 1.92E-10 | 0.004937 |
| 07Apr2011 | 15099 | 812.19  | -0.05579 | 4 K.K+14.016 chr5@5700  | 3.87E-10 | 0.006567 |
| 07Apr2011 | 6064  | 635.35  | 7.408844 | 4 R.KIEKIEKSI chr5@9162 | 2.21E-11 | 4.77E-04 |
| 07Apr2011 | 15370 | 1130.56 | -20.2086 | 2 R.RK+14.01 chr4@1034  | 3.31E-11 | 5.47E-04 |
| 07Apr2011 | 1055  | 443.28  | 12.69649 | 2 K.LLESAPK\ chr4@1585  | 3.00E-10 | 0.009056 |
| 07Apr2011 | 1110  | 443.28  | 12.69649 | 2 K.LLESAPK\ chr4@1585  | 2.59E-10 | 0.00689  |
| 07Apr2011 | 6881  | 1056.64 | -16.9765 | 2 K.KRRKRMI chr1@9195   | 1.57E-10 | 0.002743 |
| 07Apr2011 | 7162  | 636.33  | -6.96881 | 2 R.LAATKEN chr1@2522   | 1.65E-10 | 0.002785 |
| 07Apr2011 | 8428  | 900.41  | -13.3008 | 2 L.K+14.016 Splice@chr | 3.49E-10 | 0.006296 |
| 07Apr2011 | 7468  | 900.41  | -13.3008 | 2 L.K+14.016 Splice@chr | 5.93E-10 | 0.008979 |
| 07Apr2011 | 12566 | 1143.87 | 4.220916 | 3 K.NMITGTS Splice@chr  | 4.29E-10 | 0.006864 |
| 07Apr2011 | 14698 | 1136.54 | -24.1699 | 2 _YRITISTFE chr1@5408  | 2.55E-10 | 0.003743 |
| 07Apr2011 | 14651 | 692.36  | -3.42145 | 4 K.LGICTPNI Splice@chr | 1.99E-10 | 0.002886 |
| 07Apr2011 | 10480 | 579.65  | -3.79726 | 3 _LLDFLPV\ chrX@7991   | 4.53E-11 | 6.75E-04 |
| 07Apr2011 | 10534 | 579.65  | -3.79726 | 3 _LLDFLPV\ chrX@7991   | 4.56E-10 | 0.006439 |
| 07Apr2011 | 7550  | 748.73  | -12.625  | 3 R.LPSKENL\ chr4@5635  | 1.12E-10 | 0.002291 |
| 07Apr2011 | 7874  | 748.73  | -12.625  | 3 R.LPSKENL\ chr4@5635  | 3.02E-10 | 0.009056 |
| 07Apr2011 | 7753  | 748.72  | -26.0118 | 3 R.LPSKENL\ chr4@5635  | 5.09E-10 | 0.008977 |

|           |       |        |          |                         |          |          |
|-----------|-------|--------|----------|-------------------------|----------|----------|
| 07Apr2011 | 8130  | 748.73 | -12.625  | 3 R.LPSKENL\ chr4@5639  | 3.15E-10 | 0.008341 |
| 07Apr2011 | 8178  | 748.73 | -12.625  | 3 R.LPSKENL\ chr4@5639  | 9.93E-11 | 0.002073 |
| 07Apr2011 | 9708  | 748.72 | -26.0118 | 3 R.LPSKENL\ chr4@5639  | 1.15E-10 | 0.001389 |
| 07Apr2011 | 6815  | 748.72 | -26.0118 | 3 R.LPSKENL\ chr4@5639  | 1.10E-10 | 0.002182 |
| 07Apr2011 | 10749 | 918.53 | -15.8984 | 1 K.SSLMVIIIR chr4@1212 | 4.10E-10 | 0.005682 |
| 07Apr2011 | 729   | 488.28 | -26.642  | 2 R.SLLSRG\ chr1@1329   | 2.84E-10 | 0.007425 |
| 07Apr2011 | 12075 | 999.49 | -11.7107 | 2 R.QVSEFFD Splice@chr  | 4.85E-10 | 0.008264 |
| 07Apr2011 | 1650  | 444.59 | 24.58443 | 3 \_KCRGDLII chr1@3792  | 4.18E-10 | 0.006875 |
| 07Apr2011 | 5954  | 516.78 | 20.90941 | 2 L.EQGTAAL' Splice@chr | 4.25E-10 | 0.007683 |
| 07Apr2011 | 15079 | 941.92 | 1.210872 | 3 K.K+14.016 chr5@1780  | 5.89E-10 | 0.008955 |
| 07Apr2011 | 12715 | 660.86 | -21.4275 | 2 K.QCLHHNI Splice@chr  | 2.54E-11 | 3.03E-04 |
| 07Apr2011 | 11737 | 660.86 | -21.4275 | 2 K.QCLHHNI Splice@chr  | 4.40E-11 | 9.15E-04 |
| 07Apr2011 | 10984 | 686.32 | 12.02349 | 2 K.YNTYCSM chr5@1407   | 3.17E-10 | 0.006278 |
| 07Apr2011 | 8673  | 1004.5 | -19.7454 | 2 K.FVQWEK' Splice@chr  | 5.03E-10 | 0.009053 |
| 07Apr2011 | 6800  | 626.31 | 6.247018 | 2 K.SEELMYN chr4@2673   | 1.01E-13 | 0        |
| 07Apr2011 | 7070  | 626.31 | 6.247018 | 2 K.SEELMYN chr4@2673   | 1.53E-13 | 0        |
| 07Apr2011 | 795   | 423.74 | -25.4107 | 2 R.VITASEV\ chr2@4470  | 2.87E-10 | 0.00555  |
| 07Apr2011 | 13031 | 742.88 | -6.21424 | 2 K.M+15.99 chr4@1648   | 3.63E-10 | 0.006189 |
| 07Apr2011 | 14019 | 742.88 | -6.21424 | 2 K.M+15.99 chr4@1648   | 4.32E-10 | 0.007296 |
| 07Apr2011 | 11574 | 742.88 | -6.21424 | 2 K.M+15.99 chr4@1648   | 2.40E-10 | 0.004122 |
| 07Apr2011 | 12043 | 742.88 | -6.21424 | 2 K.M+15.99 chr4@1648   | 5.74E-10 | 0.008853 |
| 07Apr2011 | 9632  | 762.43 | 16.40509 | 2 \_MK+14.0 chr4@7749   | 6.43E-10 | 0.009822 |
| 07Apr2011 | 9523  | 762.43 | 16.40509 | 2 \_MK+14.0 chr4@7749   | 6.25E-10 | 0.009255 |
| 07Apr2011 | 10585 | 883.51 | 14.29139 | 2 \_KIQLLVNI chr2@3282  | 5.30E-10 | 0.007867 |
| 07Apr2011 | 14212 | 774.96 | 20.47968 | 2 K.WAELVVI chr3@1117   | 5.94E-10 | 0.008955 |
| 07Apr2011 | 2567  | 577.32 | -25.9464 | 2 K.KALAFFD chrX@1031   | 3.43E-10 | 0.006864 |
| 07Apr2011 | 3221  | 577.32 | -25.9464 | 2 K.KALAFFD chrX@1031   | 4.55E-10 | 0.007373 |
| 07Apr2011 | 10813 | 853.1  | -11.8226 | 3 T.QTTKM+ chr5@1477    | 3.23E-10 | 0.005288 |
| 07Apr2011 | 4355  | 416.74 | 14.38794 | 2 R.MVGSGIK chrX@1353   | 2.78E-10 | 0.004522 |
| 07Apr2011 | 4239  | 416.74 | 14.38794 | 2 R.MVGSGIK chrX@1353   | 5.25E-10 | 0.009747 |
| 07Apr2011 | 13433 | 940.4  | -17.6481 | 2 R.CEYEGEQ chr4@3596   | 5.30E-10 | 0.009557 |
| 07Apr2011 | 4247  | 713.88 | 24.14504 | 2 \_IVIDEQEC Splice@chr | 4.67E-10 | 0.008531 |
| 07Apr2011 | 14847 | 646.34 | -14.6661 | 3 N.NDSDILF' chr1@1264  | 6.47E-10 | 0.009428 |
| 07Apr2011 | 15886 | 646.34 | -14.6661 | 3 N.NDSDILF' chr1@1264  | 5.24E-10 | 0.009747 |
| 07Apr2011 | 2176  | 702.86 | -7.52609 | 2 R.FFFFLNFF Splice@chr | 3.28E-11 | 8.77E-04 |
| 07Apr2011 | 12766 | 953.26 | 20.59712 | 4 \_SDNDLFE Splice@chr  | 2.09E-10 | 0.003184 |
| 07Apr2011 | 9417  | 580.99 | 21.79819 | 3 R.LLLM+15 chr2@1284   | 5.36E-10 | 0.008163 |
| 07Apr2011 | 12067 | 604.31 | 9.712268 | 2 R.RYCPNAT chr4@1259   | 1.23E-10 | 0.003686 |
| 07Apr2011 | 5978  | 614.28 | -28.0506 | 4 K.QETADTT chr4@1361   | 4.21E-10 | 0.006655 |
| 07Apr2011 | 7166  | 769.38 | 3.516829 | 4 K.ETVEKEN chr5@7490   | 2.95E-10 | 0.004212 |
| 07Apr2011 | 16292 | 812.18 | 19.96492 | 3 R.VSPGTK+ chr3@1035   | 1.07E-10 | 0.002363 |
| 07Apr2011 | 7462  | 766.43 | 8.931017 | 2 \_LKFSENKI chr1@1005  | 1.02E-10 | 0.002017 |
| 07Apr2011 | 13707 | 463.5  | -27.8449 | 4 R.SFWPAIL Splice@chr  | 2.93E-10 | 0.00393  |
| 07Apr2011 | 3534  | 501.32 | 2.20025  | 2 K.KVVRLT chr4@3965    | 6.01E-10 | 0.009096 |
| 07Apr2011 | 6541  | 902.01 | 28.51995 | 2 K.WLFLLG chr2@6849    | 4.09E-10 | 0.006875 |
| 07Apr2011 | 1945  | 535.26 | 12.45276 | 2 R.QLEQTYC Splice@chr  | 3.23E-11 | 5.15E-04 |
| 07Apr2011 | 16729 | 883.44 | -17.2914 | 2 R.DTSNWD chrX@1707    | 1.81E-10 | 0.002996 |

|           |       |         |          |                          |          |          |
|-----------|-------|---------|----------|--------------------------|----------|----------|
| 07Apr2011 | 12010 | 1130.17 | 26.48691 | 2 K.KTKKFTFI chr2@1431   | 1.55E-10 | 0.002743 |
| 07Apr2011 | 14258 | 828.1   | -20.3497 | 3 R.RK+14.01 Splice@chr  | 5.60E-10 | 0.008846 |
| 07Apr2011 | 15604 | 828.1   | -20.3497 | 3 R.RK+14.01 Splice@chr  | 5.98E-11 | 0.001274 |
| 07Apr2011 | 13508 | 828.1   | -20.3497 | 3 R.RK+14.01 Splice@chr  | 1.17E-10 | 0.002554 |
| 07Apr2011 | 4618  | 582.64  | -22.5961 | 3 R.ELSPQNL chr1@2739    | 2.96E-10 | 0.007742 |
| 07Apr2011 | 4336  | 582.64  | -22.5961 | 3 R.ELSPQNL chr1@2739    | 2.11E-10 | 0.004603 |
| 07Apr2011 | 14846 | 913.99  | -23.1973 | 2 R.RRRK+14 chr5@1815    | 5.30E-10 | 0.008331 |
| 07Apr2011 | 4128  | 491.27  | 9.835197 | 2 K.M+15.99 chrX@8602    | 2.26E-10 | 0.003991 |
| 07Apr2011 | 3256  | 527.77  | -6.8362  | 2 R.GEGNGIK chrX@4553    | 2.62E-10 | 0.003992 |
| 07Apr2011 | 2924  | 527.77  | -6.8362  | 2 R.GEGNGIK chrX@4553    | 2.42E-10 | 0.003745 |
| 07Apr2011 | 6444  | 705.83  | -3.72364 | 2 M.PSMEEV chr5@4890     | 3.64E-15 | 0        |
| 07Apr2011 | 6542  | 705.83  | -3.72364 | 2 M.PSMEEV Splice@chr    | 1.68E-13 | 0        |
| 07Apr2011 | 6491  | 705.83  | -3.72364 | 2 M.PSMEEV chr5@4890     | 2.90E-15 | 0        |
| 07Apr2011 | 6403  | 705.83  | -3.72364 | 2 M.PSMEEV chr5@4890     | 1.72E-15 | 0        |
| 07Apr2011 | 6149  | 705.84  | 10.47814 | 2 M.PSMEEV chr5@4890     | 1.44E-15 | 0        |
| 07Apr2011 | 6193  | 705.83  | -3.72364 | 2 M.PSMEEV chr5@4890     | 2.52E-15 | 0        |
| 07Apr2011 | 7792  | 705.83  | -3.72364 | 2 M.PSMEEV Splice@chr    | 3.10E-12 | 0        |
| 07Apr2011 | 7737  | 705.83  | -3.72364 | 2 M.PSMEEV chr5@4890     | 8.41E-14 | 0        |
| 07Apr2011 | 12094 | 742.88  | 15.68508 | 2 R.SFSIDHV\ chr3@6588   | 2.76E-10 | 0.005608 |
| 07Apr2011 | 15072 | 742.01  | -14.4747 | 3 _ .NIYDMFL chrX@1256   | 4.10E-10 | 0.007177 |
| 07Apr2011 | 15491 | 898.42  | 6.373708 | 3 R.DISLQDEI chr2@7258   | 1.02E-16 | 0        |
| 07Apr2011 | 17538 | 898.41  | -4.78456 | 3 R.DISLQDEI chr2@7258   | 8.52E-16 | 0        |
| 07Apr2011 | 9746  | 978     | -20.678  | 2 K.LFEKK+14 chr1@1409   | 1.05E-10 | 0.001304 |
| 07Apr2011 | 12781 | 772.42  | 3.164863 | 2 K.HPSFLLDI chr1@1493   | 5.24E-10 | 0.009425 |
| 07Apr2011 | 6454  | 992.54  | 16.1896  | 1 K.NTMWIV chr5@4366     | 5.43E-11 | 0.001059 |
| 07Apr2011 | 999   | 593.02  | -0.27493 | 3 R.SKWSKSS chrX@8722    | 3.15E-10 | 0.009476 |
| 07Apr2011 | 15426 | 799.8   | -16.7904 | 3 R.CLAGLLTI chr5@1546   | 6.16E-10 | 0.00973  |
| 07Apr2011 | 17109 | 962.8   | 19.96909 | 3 _ .GCSIVPIS Splice@chr | 8.31E-12 | 0        |
| 07Apr2011 | 5333  | 596.32  | 13.94377 | 2 K.M+15.99 chr2@1468    | 3.56E-10 | 0.009726 |
| 07Apr2011 | 6760  | 638.79  | 20.76713 | 2 K.MRM+15 chr4@1234     | 3.12E-10 | 0.004429 |
| 07Apr2011 | 6152  | 927.49  | 7.049038 | 1 R.NMIVHG\ chr1@7221    | 4.31E-10 | 0.007296 |
| 07Apr2011 | 2626  | 456.77  | 6.026386 | 2 K.TSHVLTV chr4@1444    | 5.80E-10 | 0.008853 |
| 07Apr2011 | 14162 | 750.4   | -7.98166 | 2 _ .NILISGRN chr2@5381  | 5.56E-10 | 0.008878 |
| 07Apr2011 | 2198  | 560.34  | -25.0973 | 2 R.EKVGKFR chr3@1214    | 6.32E-10 | 0.009536 |
| 07Apr2011 | 8461  | 642.87  | -23.3608 | 2 R.VKTGAK+ chr2@1491    | 1.72E-10 | 0.003073 |
| 07Apr2011 | 5170  | 611.32  | -24.901  | 2 K.KNNM+1 chr3@1247     | 5.62E-10 | 0.009231 |
| 07Apr2011 | 4902  | 611.32  | -24.901  | 2 K.KNNM+1 chr3@1247     | 3.97E-10 | 0.005185 |
| 07Apr2011 | 14511 | 804.44  | 2.559552 | 3 R.DSAICNG Splice@chr   | 1.86E-10 | 0.003022 |
| 07Apr2011 | 14485 | 962.87  | -13.9599 | 3 F.FKVIPGV\ chrX@9953   | 1.99E-11 | 1.88E-04 |
| 07Apr2011 | 16477 | 962.86  | -24.2819 | 3 F.FKVIPGV\ chrX@9953   | 3.60E-12 | 0        |
| 07Apr2011 | 15985 | 962.87  | -13.9599 | 3 F.FKVIPGV\ chrX@9953   | 2.34E-10 | 0.003994 |
| 07Apr2011 | 6571  | 567.31  | -27.375  | 2 K.ARKPTQA chr5@3694    | 1.50E-12 | 0        |
| 07Apr2011 | 3481  | 431.23  | 26.44045 | 4 K.YVITNGIN chr4@8395   | 5.91E-11 | 0.001145 |
| 07Apr2011 | 3989  | 430.98  | 28.39109 | 4 K.YVITNGIN chr4@8395   | 7.10E-11 | 0.001181 |
| 07Apr2011 | 1672  | 506.26  | -9.96601 | 2 K.KDYSGGT chrX@1465    | 1.26E-10 | 0.002035 |
| 07Apr2011 | 4408  | 730.33  | -26.2772 | 2 C.RFFSNNP chr5@1970    | 6.33E-10 | 0.009983 |
| 07Apr2011 | 14388 | 1030.52 | -5.2171  | 2 K.MRM+15 Splice@chr    | 3.67E-10 | 0.00542  |

|           |       |         |          |                         |          |          |
|-----------|-------|---------|----------|-------------------------|----------|----------|
| 07Apr2011 | 2960  | 741.38  | -23.1647 | 2 K.FPENRHL chr2@1477   | 1.22E-10 | 0.002035 |
| 07Apr2011 | 2913  | 741.38  | -23.1647 | 2 K.FPENRHL chr2@1477   | 4.72E-10 | 0.007781 |
| 07Apr2011 | 6955  | 506.27  | -14.0125 | 4 R.FTNIEEG chrX@8984   | 4.49E-10 | 0.007814 |
| 07Apr2011 | 13178 | 607.32  | 5.838675 | 2 K.SCQK+14 chr4@4287   | 6.43E-10 | 0.009334 |
| 07Apr2011 | 3862  | 504.28  | -26.2759 | 3 _RSTNICIL chr1@8218   | 1.82E-10 | 0.00268  |
| 07Apr2011 | 16322 | 935.73  | -13.9603 | 4 R.GFGVDGI chr2@8039   | 1.04E-11 | 1.57E-04 |
| 07Apr2011 | 8086  | 917.48  | -5.49614 | 2 _LK+14.01 chr1@6453   | 2.99E-10 | 0.004641 |
| 07Apr2011 | 8034  | 916.98  | -3.66487 | 2 _LK+14.01 chr1@6453   | 5.31E-10 | 0.007331 |
| 07Apr2011 | 7090  | 917.49  | 5.431846 | 2 _LK+14.01 chr1@6453   | 1.24E-10 | 0.002717 |
| 07Apr2011 | 7204  | 916.98  | -3.66487 | 2 _LK+14.01 chr1@6453   | 8.77E-11 | 0.001901 |
| 07Apr2011 | 8414  | 917.48  | -5.49614 | 2 _LK+14.01 chr1@6453   | 3.64E-10 | 0.005953 |
| 07Apr2011 | 8466  | 917.48  | -5.49614 | 2 _LK+14.01 chr1@6453   | 5.05E-10 | 0.008754 |
| 07Apr2011 | 8357  | 916.98  | -3.66487 | 2 _LK+14.01 chr1@6453   | 2.95E-10 | 0.00393  |
| 07Apr2011 | 8266  | 916.98  | -3.66487 | 2 _LK+14.01 chr1@6453   | 6.05E-10 | 0.009609 |
| 07Apr2011 | 8212  | 916.98  | -3.66487 | 2 _LK+14.01 chr1@6453   | 5.60E-10 | 0.009134 |
| 07Apr2011 | 17820 | 1047.88 | -8.37803 | 3 K.RYMFWG Splice@chr   | 1.40E-10 | 0.001776 |
| 07Apr2011 | 12845 | 566.32  | -12.2061 | 3 R.LIRNSDKI Splice@chr | 3.38E-10 | 0.004813 |
| 07Apr2011 | 10992 | 565.99  | -4.32119 | 3 R.LIRNSDKI Splice@chr | 2.23E-11 | 1.88E-04 |
| 07Apr2011 | 12296 | 565.99  | -4.32119 | 3 R.LIRNSDKI Splice@chr | 4.63E-11 | 3.03E-04 |
| 07Apr2011 | 10476 | 622.33  | 9.587405 | 2 R.AK+14.01 chr2@4270  | 1.59E-10 | 0.002466 |
| 07Apr2011 | 9971  | 622.33  | 9.587405 | 2 R.AK+14.01 chr2@4270  | 5.51E-11 | 8.39E-04 |
| 07Apr2011 | 10707 | 622.33  | 9.587405 | 2 R.AK+14.01 chr2@4270  | 7.94E-11 | 0.001843 |
| 07Apr2011 | 10118 | 622.33  | 9.587405 | 2 R.AK+14.01 chr2@4270  | 3.69E-10 | 0.004536 |
| 07Apr2011 | 4347  | 529.6   | -12.9775 | 3 _AFHESKLI chrX@3409   | 2.12E-10 | 0.005746 |
| 07Apr2011 | 4209  | 529.6   | -12.9775 | 3 _AFHESKLI chrX@3409   | 8.54E-11 | 0.002697 |
| 07Apr2011 | 4440  | 529.6   | -12.9775 | 3 _AFHESKLI chrX@3409   | 2.62E-10 | 0.007269 |
| 07Apr2011 | 12849 | 887.11  | -11.828  | 3 ?CTDANLK Splice@chr   | 4.60E-10 | 0.007518 |
| 07Apr2011 | 13346 | 561.3   | -6.53603 | 2 R.FANFPVII chr2@1269  | 2.37E-10 | 0.003881 |
| 07Apr2011 | 10304 | 836.43  | -2.8493  | 2 K.FQKIFM+ chr5@1887   | 3.21E-10 | 0.005359 |
| 07Apr2011 | 12082 | 792.42  | 5.26594  | 4 R.TTGTVLD chr2@1512   | 3.91E-11 | 5.99E-04 |
| 07Apr2011 | 12075 | 477.74  | 8.001825 | 2 K.FTATGTG chr3@5103   | 4.69E-10 | 0.007983 |
| 07Apr2011 | 7444  | 606.66  | -18.8783 | 3 I.NRFNISK chrX@1250   | 2.69E-10 | 0.00448  |
| 07Apr2011 | 9225  | 607     | -9.70672 | 3 I.NRFNISK chrX@1250   | 1.64E-10 | 0.002067 |
| 07Apr2011 | 7034  | 937.47  | -1.79216 | 2 K.NIKCCFLN chr2@1156  | 3.70E-10 | 0.00542  |
| 07Apr2011 | 5080  | 476.73  | -8.21113 | 2 R.SSHEISHF chr5@1494  | 2.56E-10 | 0.006143 |
| 07Apr2011 | 5028  | 476.73  | -8.21113 | 2 R.SSHEISHF chr5@1494  | 2.03E-10 | 0.005563 |
| 07Apr2011 | 4971  | 476.73  | -8.21113 | 2 R.SSHEISHF chr5@1494  | 2.27E-10 | 0.005746 |
| 07Apr2011 | 4824  | 476.73  | -8.21113 | 2 R.SSHEISHF chr5@1494  | 1.65E-10 | 0.004551 |
| 07Apr2011 | 5033  | 476.73  | -8.21113 | 2 R.SSHEISHF chr5@1494  | 2.99E-10 | 0.008767 |
| 07Apr2011 | 3402  | 437.23  | -20.8939 | 3 I.LVWGGG chrX@2603    | 1.24E-10 | 0.002363 |
| 07Apr2011 | 3666  | 437.23  | -20.8939 | 3 I.LVWGGG chrX@2603    | 2.82E-10 | 0.005428 |
| 07Apr2011 | 2991  | 437.23  | -20.8939 | 3 I.LVWGGG chrX@2603    | 4.09E-10 | 0.00691  |
| 07Apr2011 | 2212  | 583.32  | 25.86173 | 2 K.NFHLAIM chr4@1483   | 1.69E-10 | 0.004131 |
| 07Apr2011 | 6918  | 470.47  | -17.3318 | 4 E.FGRYGM chrX@7593    | 1.32E-10 | 0.002946 |
| 07Apr2011 | 7024  | 470.47  | -17.3318 | 4 E.FGRYGM chrX@7593    | 1.22E-10 | 0.003686 |
| 07Apr2011 | 1131  | 537.27  | -12.9748 | 2 R.EIFFFWG Splice@chr  | 3.99E-10 | 0.007124 |
| 07Apr2011 | 13945 | 890.44  | 14.86661 | 2 K.GWSVPLI Splice@chr  | 2.65E-10 | 0.004004 |

|           |       |         |          |                         |          |          |
|-----------|-------|---------|----------|-------------------------|----------|----------|
| 07Apr2011 | 14903 | 890.44  | 14.86661 | 2 K.GWSVPLI Splice@chr  | 1.03E-10 | 0.001389 |
| 07Apr2011 | 14952 | 890.44  | 14.86661 | 2 K.GWSVPLI Splice@chr  | 3.82E-10 | 0.006314 |
| 07Apr2011 | 14395 | 890.45  | 26.12723 | 2 K.GWSVPLI Splice@chr  | 6.24E-10 | 0.009986 |
| 07Apr2011 | 12320 | 890.44  | 14.86661 | 2 K.GWSVPLI Splice@chr  | 7.48E-11 | 8.17E-04 |
| 07Apr2011 | 9703  | 962.48  | 13.7521  | 2 R.AYFHVTN chr1@1005   | 2.05E-10 | 0.003036 |
| 07Apr2011 | 1460  | 503.26  | 15.73747 | 2 K.DKDSGNI chr5@1425   | 2.63E-10 | 0.003992 |
| 07Apr2011 | 9656  | 608.84  | 15.16282 | 2 R.KTEEKLE5 chr2@3945  | 2.77E-10 | 0.004522 |
| 07Apr2011 | 613   | 416.23  | -19.9908 | 2 R.NASIGTLI chr4@1275  | 1.98E-10 | 0.002886 |
| 07Apr2011 | 11744 | 827.43  | 22.28988 | 3 R.MPPHPPI chrX@1038   | 2.90E-10 | 0.004641 |
| 07Apr2011 | 5882  | 431.74  | 5.455516 | 2 _PIQDVYK Splice@chr   | 1.85E-10 | 0.002886 |
| 07Apr2011 | 5490  | 431.74  | 5.455516 | 2 _PIQDVYK Splice@chr   | 1.99E-10 | 0.002361 |
| 07Apr2011 | 5564  | 431.74  | 5.455516 | 2 _PIQDVYK Splice@chr   | 2.97E-10 | 0.00393  |
| 07Apr2011 | 7501  | 557.3   | -28.62   | 4 K.ISVK+14.1 chrX@9821 | 3.12E-10 | 0.009232 |
| 07Apr2011 | 7746  | 598.33  | -21.7295 | 2 R.RFRSPNL' chrX@1651  | 3.51E-10 | 0.006529 |
| 07Apr2011 | 3782  | 898.47  | 0.171313 | 2 _NQK+14.1 Splice@chr  | 1.33E-10 | 0.002563 |
| 07Apr2011 | 11661 | 1059.23 | -2.30708 | 3 C.GGFITFFI chr5@1012  | 5.93E-10 | 0.009147 |
| 07Apr2011 | 248   | 558.33  | 17.63223 | 2 _QKKHATF chr4@1185    | 2.46E-10 | 0.004798 |
| 07Apr2011 | 5493  | 527.95  | 11.73747 | 3 K.SVVSISSE chr4@1045  | 4.03E-10 | 0.006132 |
| 07Apr2011 | 11742 | 695.36  | -28.1907 | 2 H.QHYSLIK' Splice@chr | 5.63E-10 | 0.008846 |
| 07Apr2011 | 9407  | 610.99  | -19.8783 | 3 _ISRSFFQ chr4@4155    | 5.22E-10 | 0.008065 |
| 07Apr2011 | 9142  | 1017.5  | 28.8677  | 2 R.MYM+15 chr4@7030    | 6.02E-10 | 0.009147 |
| 07Apr2011 | 6084  | 670.33  | -4.04367 | 3 R.YWWSLC Splice@chr   | 1.98E-11 | 3.73E-04 |
| 07Apr2011 | 13761 | 622.32  | -18.1733 | 2 K.KKYNSPD chr5@6882   | 1.31E-10 | 0.001776 |
| 07Apr2011 | 9379  | 557.37  | 10.13682 | 3 K.KK+14.01 chr3@1086  | 3.12E-10 | 0.004327 |
| 07Apr2011 | 476   | 407.73  | -21.7591 | 4 K.LFM+15.5 chrX@1045  | 1.01E-10 | 0.001389 |
| 07Apr2011 | 467   | 407.73  | -21.7591 | 4 K.LFM+15.5 chrX@1045  | 5.11E-10 | 0.0085   |
| 07Apr2011 | 13392 | 1118.57 | -6.04397 | 3 _MRQTRSI chr1@1434    | 2.91E-10 | 0.004154 |
| 07Apr2011 | 1786  | 543.77  | -0.44981 | 2 K.M+15.99 chrX@1550   | 1.46E-10 | 0.00198  |
| 07Apr2011 | 16262 | 911.42  | 20.49399 | 2 _PRM+15. Splice@chr   | 9.74E-11 | 0.001897 |
| 07Apr2011 | 16296 | 911.42  | 20.49399 | 2 _PRM+15. Splice@chr   | 3.83E-10 | 0.007192 |
| 07Apr2011 | 6223  | 582.35  | -7.8392  | 3 K.LERNSLKI chr1@1135  | 3.40E-11 | 5.25E-04 |
| 07Apr2011 | 10386 | 602.32  | 2.233077 | 2 R.MILEDLG chr5@4237   | 8.80E-11 | 0.001324 |
| 07Apr2011 | 3310  | 532.78  | -17.5606 | 2 R.KIMGGGI chr4@1707   | 4.45E-11 | 6.75E-04 |
| 07Apr2011 | 5003  | 611.31  | 21.10215 | 2 _QFDAKN( chr3@7347    | 2.49E-10 | 0.004122 |
| 07Apr2011 | 11771 | 803.43  | 10.08618 | 2 R.FGFEEGS chr3@6206   | 3.00E-10 | 0.004054 |
| 07Apr2011 | 10642 | 803.43  | 10.08618 | 2 R.FGFEEGS chr3@6206   | 9.51E-11 | 0.001322 |
| 07Apr2011 | 4752  | 1046.56 | 0.58376  | 1 K.KGNDEIS chr2@1115   | 7.82E-12 | 0        |
| 07Apr2011 | 5069  | 572.29  | -6.73081 | 2 K.KNSKNFY chr4@7238   | 3.62E-10 | 0.005953 |
| 07Apr2011 | 8046  | 892.48  | -0.78659 | 2 N.NELTAQI Splice@chr  | 4.24E-10 | 0.006479 |
| 07Apr2011 | 2734  | 546.78  | -19.0827 | 2 K.ETETGITC chr4@1221  | 2.98E-11 | 4.88E-04 |
| 07Apr2011 | 3713  | 546.78  | -19.0827 | 2 K.ETETGITC chr4@1221  | 4.51E-10 | 0.007518 |
| 07Apr2011 | 3627  | 546.78  | -19.0827 | 2 K.ETETGITC chr4@1221  | 4.50E-10 | 0.007518 |
| 07Apr2011 | 3666  | 546.78  | -19.0827 | 2 K.ETETGITC chr4@1221  | 1.68E-10 | 0.002759 |
| 07Apr2011 | 3451  | 546.78  | -19.0827 | 2 K.ETETGITC chr4@1221  | 1.67E-11 | 0        |
| 07Apr2011 | 6271  | 572.63  | 9.609873 | 3 K.IVLFQLFN chr3@1294  | 2.61E-10 | 0.007081 |
| 07Apr2011 | 6782  | 572.63  | 9.609873 | 3 K.IVLFQLFN chr3@1294  | 2.53E-10 | 0.005059 |
| 07Apr2011 | 6870  | 572.63  | 9.609873 | 3 K.IVLFQLFN chr3@1294  | 3.26E-10 | 0.004719 |

|           |       |         |          |                          |          |          |
|-----------|-------|---------|----------|--------------------------|----------|----------|
| 07Apr2011 | 6476  | 572.63  | 9.609873 | 3 K.IVLFQLFN chr3@1294   | 4.50E-10 | 0.007814 |
| 07Apr2011 | 6540  | 572.63  | 9.609873 | 3 K.IVLFQLFN chr3@1294   | 6.29E-10 | 0.008277 |
| 07Apr2011 | 7991  | 479.92  | 1.35942  | 3 R.IAKM+15 chr2@4765    | 6.64E-10 | 0.009744 |
| 07Apr2011 | 17202 | 975.11  | -23.3917 | 3 K.AVPFVPI\$ Splice@chr | 1.36E-10 | 0.002419 |
| 07Apr2011 | 10435 | 674.57  | -14.4838 | 5 K.KSWKKVI chrX@8026    | 5.17E-10 | 0.008623 |
| 07Apr2011 | 13787 | 1042.88 | 13.35692 | 3 H.SSSCM+1 chr3@7991    | 5.17E-10 | 0.007891 |
| 07Apr2011 | 5992  | 467.01  | -9.33583 | 4 K.ILNIHGG( chr3@1314   | 3.42E-10 | 0.006169 |
| 07Apr2011 | 5393  | 440.24  | 24.04044 | 2 R.YNRAPM chr5@4305     | 4.14E-10 | 0.00752  |
| 07Apr2011 | 6513  | 440.24  | 24.04044 | 2 R.YNRAPM chr5@4305     | 2.78E-10 | 0.005435 |
| 07Apr2011 | 9557  | 510.95  | 9.335933 | 3 _LEILELM+ Splice@chr   | 1.04E-10 | 0.001304 |
| 07Apr2011 | 8188  | 762.4   | 3.767655 | 2 K.FSNTRAK chr5@8345    | 3.40E-11 | 7.14E-04 |
| 07Apr2011 | 8234  | 762.4   | 3.767655 | 2 K.FSNTRAK Splice@chr   | 2.13E-11 | 4.88E-04 |
| 07Apr2011 | 14117 | 909.81  | -14.9364 | 3 Y.FRLQGSIL chrX@9505   | 2.20E-10 | 0.003477 |
| 07Apr2011 | 5882  | 437.46  | 16.92139 | 4 R.RGDVPEI chr3@1335    | 5.34E-12 | 0        |
| 07Apr2011 | 5777  | 437.46  | 16.92139 | 4 R.RGDVPEI chr3@1335    | 1.40E-10 | 0.001803 |
| 07Apr2011 | 11017 | 580.99  | -4.24573 | 3 _LDLFEYS( chr3@2551    | 1.03E-10 | 0.001916 |
| 07Apr2011 | 7605  | 580.66  | 3.439687 | 3 _LDLFEYS( chr3@2551    | 2.29E-10 | 0.003535 |
| 07Apr2011 | 3123  | 936.48  | 27.86052 | 1 K.LNGGYEC chr2@1191    | 4.39E-11 | 8.39E-04 |
| 07Apr2011 | 3079  | 936.48  | 27.86052 | 1 K.LNGGYEC chr2@1191    | 3.51E-11 | 5.25E-04 |
| 07Apr2011 | 13444 | 675.33  | -24.7716 | 2 K.IEMEFLVI chrX@1244   | 3.65E-10 | 0.005793 |
| 07Apr2011 | 13331 | 675.33  | -24.7716 | 2 K.IEMEFLVI chrX@1244   | 3.67E-10 | 0.005915 |
| 07Apr2011 | 12749 | 675.33  | -24.7716 | 2 K.IEMEFLVI chrX@1244   | 2.40E-10 | 0.004388 |
| 07Apr2011 | 11395 | 675.33  | -24.7716 | 2 K.IEMEFLVI chrX@1244   | 3.17E-10 | 0.005854 |
| 07Apr2011 | 7125  | 733.38  | -10.3099 | 3 K.VLLTGEEI chr4@1215   | 2.01E-10 | 0.003545 |
| 07Apr2011 | 101   | 818.41  | -2.53876 | 1 _KNEGASC chr1@1181     | 1.90E-10 | 0.003117 |
| 07Apr2011 | 13261 | 606.63  | -14.6199 | 3 K.KCNEEGC chr3@1174    | 2.12E-10 | 0.005375 |
| 07Apr2011 | 2878  | 494.59  | 17.0368  | 3 K.WYRPDD Splice@chr    | 1.39E-10 | 0.002133 |
| 07Apr2011 | 11515 | 593.28  | 3.766434 | 2 R.KNCLDEF chr5@1532    | 5.62E-10 | 0.009548 |
| 07Apr2011 | 9976  | 593.28  | 3.766434 | 2 R.KNCLDEF chr5@1532    | 5.53E-10 | 0.009231 |
| 07Apr2011 | 6831  | 1056.63 | -22.1827 | 2 V.FEKPKKI chr1@4967    | 6.66E-10 | 0.009793 |
| 07Apr2011 | 6999  | 1056.64 | -12.696  | 2 V.FEKPKKI chr1@4967    | 5.64E-10 | 0.009251 |
| 07Apr2011 | 833   | 501.34  | 21.38924 | 3 _KLLFIEKEI chr1@7672   | 2.39E-10 | 0.004631 |
| 07Apr2011 | 10952 | 800.5   | 21.68171 | 3 R.LVRFQKL chr1@1225    | 2.53E-10 | 0.004772 |
| 07Apr2011 | 12215 | 925.49  | -20.9942 | 2 R.REYGGRC chr4@7217    | 2.03E-11 | 7.19E-04 |
| 07Apr2011 | 12477 | 755.45  | 13.84135 | 3 K.KLNK+14 chr5@2302    | 4.79E-10 | 0.008552 |
| 07Apr2011 | 9855  | 1182.56 | -21.0399 | 1 R.RFAENQI chr5@1775    | 3.46E-10 | 0.009301 |
| 07Apr2011 | 9908  | 1182.56 | -21.0399 | 1 R.RFAENQI chr5@1775    | 4.39E-11 | 0.001177 |
| 07Apr2011 | 9967  | 1182.57 | -12.6646 | 1 R.RFAENQI chr5@1775    | 2.79E-10 | 0.008659 |
| 07Apr2011 | 10696 | 1182.57 | -12.6646 | 1 R.RFAENQI chr5@1775    | 2.65E-10 | 0.006325 |
| 07Apr2011 | 12346 | 1182.56 | -21.0399 | 1 R.RFAENQI chr5@1775    | 4.50E-10 | 0.007646 |
| 07Apr2011 | 12294 | 1182.56 | -21.0399 | 1 R.RFAENQI chr5@1775    | 2.97E-10 | 0.004054 |
| 07Apr2011 | 9606  | 797.43  | -27.8183 | 2 _KTRSIENF chr4@1965    | 6.20E-10 | 0.008125 |
| 07Apr2011 | 13668 | 874.93  | -18.6915 | 2 R.KINTRAS( Splice@chr  | 1.18E-10 | 0.002554 |
| 07Apr2011 | 11106 | 828.91  | 9.878935 | 2 K.KMNREG chr4@1241     | 3.04E-10 | 0.004295 |
| 07Apr2011 | 11890 | 638.8   | 14.25914 | 2 K.MKMFTC chr3@7928     | 1.98E-10 | 0.004937 |
| 07Apr2011 | 11283 | 891.92  | 22.58802 | 2 S.TEPVAPN chr4@1465    | 6.16E-10 | 0.00973  |
| 07Apr2011 | 5490  | 655.35  | 7.275669 | 2 K.LKAAAK+ chrX@4997    | 3.21E-10 | 0.005781 |

|           |       |         |          |                          |          |          |
|-----------|-------|---------|----------|--------------------------|----------|----------|
| 07Apr2011 | 9587  | 671.85  | -1.77389 | 2 _..NVKVATM chr5@1297   | 5.92E-10 | 0.008691 |
| 07Apr2011 | 12810 | 730.93  | -11.0855 | 2 _..FFHKVK+ chr5@2007   | 5.65E-11 | 0.001213 |
| 07Apr2011 | 13774 | 730.93  | -11.0855 | 2 _..FFHKVK+ chr5@2007   | 4.39E-10 | 0.00739  |
| 07Apr2011 | 3967  | 461.59  | -10.1596 | 3 K.FLISK+14 Splice@chr  | 3.17E-10 | 0.005164 |
| 07Apr2011 | 16042 | 650.08  | 4.795781 | 4 _..VLPEGSIS Splice@chr | 4.08E-10 | 0.007688 |
| 07Apr2011 | 1138  | 687.41  | -7.82493 | 1 K.KGANLGT chr2@4658    | 6.57E-10 | 0.009601 |
| 07Apr2011 | 1463  | 687.4   | -22.3188 | 1 K.KGANLGT chr2@4658    | 6.57E-10 | 0.009744 |
| 07Apr2011 | 9840  | 625.32  | -27.4566 | 4 R.M+15.99 chrX@6806    | 2.51E-10 | 0.002513 |
| 07Apr2011 | 8564  | 625.32  | -27.4566 | 4 R.M+15.99 chrX@6806    | 1.26E-10 | 0.002419 |
| 07Apr2011 | 8112  | 625.32  | -27.4566 | 4 R.M+15.99 chrX@6806    | 3.01E-10 | 0.004263 |
| 07Apr2011 | 8245  | 625.32  | -27.4566 | 4 R.M+15.99 chrX@6806    | 3.90E-10 | 0.004858 |
| 07Apr2011 | 11175 | 711.87  | 23.5264  | 2 K.M+15.99 chr2@1451    | 3.05E-10 | 0.008049 |
| 07Apr2011 | 14801 | 1132.11 | -15.1088 | 2 R.KKHARKF chr3@1279    | 5.33E-10 | 0.008838 |
| 07Apr2011 | 4345  | 509.77  | 14.99622 | 2 K.TDGNNEI chr1@1751    | 5.50E-10 | 0.008789 |
| 07Apr2011 | 4196  | 437.75  | -21.5911 | 2 R.ISVRNGT chr1@5907    | 2.16E-10 | 0.003378 |
| 07Apr2011 | 10843 | 491.64  | 23.22207 | 3 R.LLLDKPLF Splice@chr  | 3.71E-10 | 0.006277 |
| 07Apr2011 | 14056 | 491.64  | 23.22207 | 3 R.LLLDKPLF Splice@chr  | 3.79E-10 | 0.006655 |
| 07Apr2011 | 14015 | 491.64  | 23.22207 | 3 R.LLLDKPLF Splice@chr  | 2.21E-10 | 0.003477 |
| 07Apr2011 | 13244 | 491.64  | 23.22207 | 3 R.LLLDKPLF Splice@chr  | 2.65E-10 | 0.003718 |
| 07Apr2011 | 14308 | 491.64  | 23.22207 | 3 R.LLLDKPLF Splice@chr  | 2.05E-10 | 0.003221 |
| 07Apr2011 | 7929  | 523.62  | 6.773786 | 3 I.VFQNFVP chr2@1515    | 1.67E-10 | 0.002986 |
| 07Apr2011 | 8038  | 523.62  | 6.773786 | 3 I.VFQNFVP chr2@1515    | 8.99E-11 | 0.002013 |
| 07Apr2011 | 7978  | 523.62  | 6.773786 | 3 I.VFQNFVP chr2@1515    | 1.76E-10 | 0.003316 |
| 07Apr2011 | 4277  | 435.75  | 9.757472 | 2 R.VLHPYNK chrX@1200    | 5.08E-10 | 0.008754 |
| 07Apr2011 | 4332  | 435.75  | 9.757472 | 2 R.VLHPYNK chrX@1200    | 5.30E-10 | 0.009863 |
| 07Apr2011 | 4395  | 435.75  | 9.757472 | 2 R.VLHPYNK chrX@1200    | 4.32E-10 | 0.007296 |
| 07Apr2011 | 5025  | 477.25  | 15.67718 | 4 K.LGGGGGI chr3@1029    | 5.17E-10 | 0.008118 |
| 07Apr2011 | 1274  | 764.39  | 8.635064 | 2 F.EGESQCL chr5@1706    | 6.28E-10 | 0.00936  |
| 07Apr2011 | 2772  | 423.21  | -13.0106 | 2 K.YLFSGMK chr5@8268    | 4.52E-10 | 0.007518 |
| 07Apr2011 | 2572  | 423.21  | -13.0106 | 2 K.YLFSGMK chr5@8268    | 4.16E-10 | 0.007703 |
| 07Apr2011 | 8930  | 854.47  | -26.4383 | 2 K.NAEKFAI chr3@1335    | 4.78E-10 | 0.008215 |
| 07Apr2011 | 11651 | 608.33  | 9.446977 | 2 K.MPLVGVI Splice@chr   | 8.32E-16 | 0        |
| 07Apr2011 | 11709 | 608.32  | -7.03498 | 2 K.MPLVGVI Splice@chr   | 3.46E-16 | 0        |
| 07Apr2011 | 9829  | 608.33  | 9.446977 | 2 K.MPLVGVI Splice@chr   | 1.93E-13 | 0        |
| 07Apr2011 | 11430 | 608.33  | 9.446977 | 2 K.MPLVGVI Splice@chr   | 8.69E-14 | 0        |
| 07Apr2011 | 11106 | 608.32  | -7.03498 | 2 K.MPLVGVI Splice@chr   | 3.83E-16 | 0        |
| 07Apr2011 | 11159 | 608.32  | -7.03498 | 2 K.MPLVGVI Splice@chr   | 1.38E-15 | 0        |
| 07Apr2011 | 10005 | 608.33  | 9.446977 | 2 K.MPLVGVI Splice@chr   | 2.07E-14 | 0        |
| 07Apr2011 | 10197 | 608.32  | -7.03498 | 2 K.MPLVGVI Splice@chr   | 3.65E-16 | 0        |
| 07Apr2011 | 9667  | 608.33  | 9.446977 | 2 K.MPLVGVI Splice@chr   | 2.94E-15 | 0        |
| 07Apr2011 | 3941  | 413.26  | -2.36884 | 3 R.LIIIVSAHF chr3@8474  | 3.51E-10 | 0.006529 |
| 07Apr2011 | 12011 | 932.98  | -12.2465 | 2 K.KCRKCGI Splice@chr   | 6.30E-10 | 0.009741 |
| 07Apr2011 | 690   | 435.22  | -5.34145 | 2 R.LGTYSSN chr5@5289    | 1.10E-10 | 0.002171 |
| 07Apr2011 | 7865  | 751.88  | -20.0772 | 2 K.ILNSCELP chr1@3164   | 5.06E-10 | 0.0085   |
| 07Apr2011 | 7366  | 1075.05 | -16.1169 | 2 R.TCSK+14. chr2@1255   | 2.05E-10 | 0.003036 |
| 07Apr2011 | 6936  | 1075.06 | -6.79295 | 2 R.TCSK+14. chr2@1255   | 3.86E-10 | 0.00759  |
| 07Apr2011 | 13722 | 884.46  | -26.4597 | 2 R.ARGPEHI chr1@1050    | 4.48E-10 | 0.007288 |

|           |       |         |          |                         |          |          |
|-----------|-------|---------|----------|-------------------------|----------|----------|
| 07Apr2011 | 7353  | 521.28  | 1.17314  | 3 K.ALEKEDIF chr1@1462  | 1.01E-10 | 0.002363 |
| 07Apr2011 | 8097  | 520.27  | -4.54494 | 3 K.LM+15.9 chr1@1132   | 3.69E-10 | 0.006144 |
| 07Apr2011 | 10678 | 473.57  | -23.6784 | 3 R.TSFHSSL chr5@5498   | 3.29E-10 | 0.009615 |
| 07Apr2011 | 12935 | 473.57  | -23.6784 | 3 R.TSFHSSL chr5@5498   | 9.98E-11 | 0.001897 |
| 07Apr2011 | 568   | 495.29  | 7.902937 | 2 R.NQLRGVI chr5@8694   | 5.61E-10 | 0.009231 |
| 07Apr2011 | 7046  | 447.75  | 26.50552 | 2 R.FGISATN Splice@chr  | 3.32E-10 | 0.006039 |
| 07Apr2011 | 16973 | 572.77  | 19.10847 | 2 R.CSSRYRCI Splice@chr | 4.24E-10 | 0.006479 |
| 07Apr2011 | 16533 | 572.77  | 19.10847 | 2 R.CSSRYRCI Splice@chr | 1.58E-10 | 0.002785 |
| 07Apr2011 | 13610 | 572.77  | 19.10847 | 2 R.CSSRYRCI Splice@chr | 5.62E-10 | 0.008577 |
| 07Apr2011 | 13743 | 722.45  | -4.95112 | 2 R.RK+14.01 Splice@chr | 3.60E-10 | 0.005673 |
| 07Apr2011 | 11033 | 722.45  | -4.95112 | 2 R.RK+14.01 Splice@chr | 3.95E-10 | 0.007703 |
| 07Apr2011 | 1340  | 585.34  | 6.893935 | 2 K.NLSSPSL chr3@1206   | 6.33E-11 | 0.001247 |
| 07Apr2011 | 5157  | 820.97  | -16.2269 | 2 R.KVPEVSV chr4@6600   | 3.26E-10 | 0.009615 |
| 07Apr2011 | 3899  | 583.79  | -23.2497 | 2 R.YLAAAAC chr5@9265   | 4.15E-10 | 0.006842 |
| 07Apr2011 | 14112 | 916.98  | -20.1114 | 4 R.YEKVIIFN chr5@1391  | 2.76E-10 | 0.00536  |
| 07Apr2011 | 17639 | 916.98  | -20.1114 | 4 R.YEKVIIFN chr5@1391  | 5.17E-10 | 0.009375 |
| 07Apr2011 | 17271 | 916.98  | -20.1114 | 4 R.YEKVIIFN chr5@1391  | 4.61E-10 | 0.008531 |
| 07Apr2011 | 15189 | 916.98  | -20.1114 | 4 R.YEKVIIFN chr5@1391  | 6.20E-10 | 0.00923  |
| 07Apr2011 | 14294 | 916.98  | -20.1114 | 4 R.YEKVIIFN chr5@1391  | 9.67E-11 | 0.001304 |
| 07Apr2011 | 4520  | 614     | 16.37291 | 3 R.EVTLLIEN chr1@7885  | 5.35E-10 | 0.009557 |
| 07Apr2011 | 13555 | 835.45  | -7.2977  | 4 R.K+14.016 chrX@9996  | 2.62E-10 | 0.002639 |
| 07Apr2011 | 11662 | 835.45  | -7.2977  | 4 R.K+14.016 chrX@9996  | 5.97E-10 | 0.008979 |
| 07Apr2011 | 12055 | 667.01  | -22.2996 | 3 _FFM+15.1 chr3@1415   | 2.41E-10 | 0.004436 |
| 07Apr2011 | 11808 | 804.09  | -3.21782 | 3 R.QLTTLEI Splice@chr  | 1.01E-15 | 0        |
| 07Apr2011 | 11832 | 804.09  | -3.21782 | 3 R.QLTTLEI Splice@chr  | 4.65E-12 | 0        |
| 07Apr2011 | 9881  | 804.1   | 9.150142 | 3 R.QLTTLEI Splice@chr  | 1.66E-16 | 0        |
| 07Apr2011 | 12650 | 804.1   | 9.150142 | 3 R.QLTTLEI Splice@chr  | 1.64E-13 | 0        |
| 07Apr2011 | 13067 | 804.1   | 9.150142 | 3 R.QLTTLEI Splice@chr  | 3.43E-16 | 0        |
| 07Apr2011 | 2843  | 1019.56 | 9.65939  | 1 R.NCLRSIQ Splice@chr  | 4.56E-10 | 0.006916 |
| 07Apr2011 | 11568 | 941     | -12.2448 | 2 R.WIEFPGY chrX@1765   | 3.85E-10 | 0.004694 |
| 07Apr2011 | 2950  | 422.97  | -27.3885 | 4 R.KSVAAA chrX@6057    | 6.22E-10 | 0.009711 |
| 07Apr2011 | 16153 | 1078.6  | -26.0367 | 2 V.RAGESSV chrX@1745   | 6.39E-11 | 0.001274 |
| 07Apr2011 | 12670 | 885.49  | 27.32738 | 2 _NNHCRLF chr3@2252    | 4.31E-10 | 0.006916 |
| 07Apr2011 | 8773  | 779.43  | -25.3553 | 1 _YVNVGV chr4@1784     | 3.69E-10 | 0.006106 |
| 07Apr2011 | 5324  | 555.63  | -12.1052 | 3 K.EVSAIFY chr5@1566   | 6.63E-11 | 0.001172 |
| 07Apr2011 | 977   | 438.24  | -5.86293 | 2 K.VDVCRV chr2@9681    | 5.06E-10 | 0.008001 |
| 07Apr2011 | 7332  | 567.33  | 16.56024 | 2 K.FQVPRNL chr4@4785   | 3.07E-10 | 0.004327 |
| 07Apr2011 | 11097 | 572.82  | 18.14611 | 2 _NSIVGYIN chr4@1156   | 8.99E-11 | 0.001916 |
| 07Apr2011 | 3742  | 628.08  | -5.15865 | 4 K.VRK+14.0 chr3@1821  | 5.39E-10 | 0.007331 |
| 07Apr2011 | 15246 | 877.45  | -7.15686 | 4 N.AEMRRE chr5@2575    | 4.34E-10 | 0.007288 |
| 07Apr2011 | 4361  | 543.36  | 23.29588 | 2 K.IIVCGILK chr4@1305  | 1.80E-10 | 0.003022 |
| 07Apr2011 | 15416 | 814.48  | -17.1534 | 2 K.RTILQLNF chr5@4352  | 4.22E-10 | 0.006479 |
| 07Apr2011 | 14768 | 814.48  | -17.1534 | 2 K.RTILQLNF chr5@4352  | 2.51E-10 | 0.00451  |
| 07Apr2011 | 12839 | 794.42  | 4.846451 | 2 _SEIYHSMN chr2@5177   | 5.27E-10 | 0.007331 |
| 07Apr2011 | 8952  | 769.39  | -19.1431 | 2 R.TLLTMRN chr3@1348   | 4.54E-10 | 0.008531 |
| 07Apr2011 | 8171  | 716.38  | -7.93465 | 2 K.FEILADSK chrX@9688  | 3.45E-10 | 0.004933 |
| 07Apr2011 | 16480 | 929.15  | -28.8338 | 3 R.KSTAKLK chr2@8595   | 3.70E-10 | 0.007069 |

|           |       |         |          |                         |          |          |
|-----------|-------|---------|----------|-------------------------|----------|----------|
| 07Apr2011 | 12531 | 840.74  | 18.77726 | 4 R.KSTLNPR chr4@1848   | 1.37E-10 | 0.001627 |
| 07Apr2011 | 12610 | 750.03  | -19.7544 | 3 R.SRK+14.C chr5@1927  | 2.83E-10 | 0.003284 |
| 07Apr2011 | 12307 | 750.04  | -6.49357 | 3 R.SRK+14.C chr5@1927  | 4.16E-10 | 0.007688 |
| 07Apr2011 | 16418 | 724.92  | 11.51831 | 2 G.LSSNSSIE chr1@1482  | 3.84E-10 | 0.006132 |
| 07Apr2011 | 13020 | 724.92  | 11.51831 | 2 G.LSSNSSIE chr1@1482  | 2.92E-10 | 0.00536  |
| 07Apr2011 | 16314 | 724.92  | 11.51831 | 2 G.LSSNSSIE chr1@1482  | 2.21E-10 | 0.002398 |
| 07Apr2011 | 15797 | 724.92  | 11.51831 | 2 G.LSSNSSIE chr1@1482  | 2.80E-10 | 0.005428 |
| 07Apr2011 | 14249 | 724.92  | 11.51831 | 2 G.LSSNSSIE chr1@1482  | 3.35E-10 | 0.005326 |
| 07Apr2011 | 4728  | 624.33  | 9.752617 | 2 R.QHAYAVI chrX@1402   | 9.06E-11 | 0.002086 |
| 07Apr2011 | 11330 | 945.46  | -26.5601 | 2 K.IYKCPKNI chr3@1278  | 3.05E-10 | 0.004561 |
| 07Apr2011 | 14000 | 1195.58 | 12.14743 | 3 _QVEPFET chr5@2078    | 6.07E-10 | 0.008974 |
| 07Apr2011 | 8437  | 635.79  | -28.0754 | 2 K.TLM+15.1 chrX@1355  | 5.25E-10 | 0.008065 |
| 07Apr2011 | 7584  | 599.98  | -20.5154 | 3 R.KYVGGLS chr2@2812   | 1.48E-10 | 0.002743 |
| 07Apr2011 | 3336  | 517.96  | 8.547189 | 3 R.QISGMKI chr2@1415   | 1.82E-10 | 0.002886 |
| 07Apr2011 | 7937  | 600.29  | 11.40701 | 2 R.QYTDDSF chr3@9525   | 4.57E-10 | 0.008531 |
| 07Apr2011 | 5604  | 520.94  | 5.634781 | 3 K.QMAVNY chr4@3717    | 2.62E-16 | 0        |
| 07Apr2011 | 6710  | 520.94  | 5.634781 | 3 K.QMAVNY chr4@3717    | 3.08E-15 | 0        |
| 07Apr2011 | 12931 | 1157.61 | 4.8042   | 3 N.YSFGPK+ chr5@6215   | 3.91E-10 | 0.00636  |
| 07Apr2011 | 12213 | 836.19  | -26.5274 | 4 K.NLVREFS chr5@6946   | 7.07E-11 | 0.001511 |
| 07Apr2011 | 12932 | 468.91  | -17.4792 | 3 K.TSRNAFK chr1@3696   | 5.60E-10 | 0.009134 |
| 07Apr2011 | 14370 | 831.95  | -16.4251 | 2 K.PM+15.9 chr3@1124   | 4.21E-10 | 0.006479 |
| 07Apr2011 | 13342 | 831.95  | -16.4251 | 2 K.PM+15.9 chr3@1124   | 2.61E-10 | 0.003876 |
| 07Apr2011 | 13724 | 831.95  | -16.4251 | 2 K.PM+15.9 chr3@1124   | 5.24E-10 | 0.008622 |
| 07Apr2011 | 4365  | 677.95  | -11.2748 | 3 _VGDCPGI Splice@chr   | 4.22E-10 | 0.007179 |
| 07Apr2011 | 12024 | 1056.22 | 29.33653 | 3 R.TTGVLVD Splice@chr  | 1.54E-11 | 1.54E-04 |
| 07Apr2011 | 8631  | 701.36  | 28.23715 | 3 K.NNPYMS Splice@chr   | 2.12E-10 | 0.002511 |
| 07Apr2011 | 8762  | 701.36  | 28.23715 | 3 K.NNPYMS Splice@chr   | 1.95E-10 | 0.0028   |
| 07Apr2011 | 8541  | 1155.07 | 7.858161 | 2 L.EKDMLQI Splice@chr  | 2.00E-10 | 0.003255 |
| 07Apr2011 | 10281 | 1144.59 | 27.90078 | 2 _YYHFTLDI chr5@8295   | 1.67E-10 | 0.004551 |
| 07Apr2011 | 10583 | 1144.59 | 27.90078 | 2 _YYHFTLDI chr5@8295   | 4.97E-10 | 0.00759  |
| 07Apr2011 | 15212 | 990.01  | -7.37741 | 2 G.CSWRNG chrX@1593    | 3.24E-10 | 0.005151 |
| 07Apr2011 | 16294 | 990.01  | -7.37741 | 2 G.CSWRNG chrX@1593    | 4.99E-10 | 0.008754 |
| 07Apr2011 | 13504 | 990.01  | -7.37741 | 2 G.CSWRNG chrX@1593    | 1.39E-11 | 1.82E-04 |
| 07Apr2011 | 10670 | 708.85  | -6.38076 | 2 R.SQDFVDf chr1@1093   | 4.96E-10 | 0.0085   |
| 07Apr2011 | 10798 | 759.4   | -15.0495 | 2 K.FIDANLQ chr4@8206   | 4.53E-10 | 0.00742  |
| 07Apr2011 | 10165 | 759.4   | -15.0495 | 2 K.FIDANLQ chr4@8206   | 2.97E-10 | 0.00523  |
| 07Apr2011 | 10977 | 759.4   | -15.0495 | 2 K.FIDANLQ chr4@8206   | 4.33E-10 | 0.00706  |
| 07Apr2011 | 6133  | 687.7   | -10.5473 | 3 L.IFK+14.01 chr3@8836 | 5.83E-10 | 0.009948 |
| 07Apr2011 | 3490  | 456.26  | -17.7862 | 3 K.LQK+14.C chr4@1703  | 3.99E-10 | 0.007703 |
| 07Apr2011 | 5659  | 719.99  | 25.04349 | 2 R.ITK+14.0: chr2@7238 | 5.97E-10 | 0.009375 |
| 07Apr2011 | 1993  | 626.82  | -18.5922 | 2 W.QFDLGK Splice@chr   | 1.45E-10 | 0.004256 |
| 07Apr2011 | 2610  | 626.82  | -18.5922 | 2 W.QFDLGK Splice@chr   | 1.05E-10 | 0.001389 |
| 07Apr2011 | 2559  | 626.82  | -18.5922 | 2 W.QFDLGK Splice@chr   | 2.35E-10 | 0.002513 |
| 07Apr2011 | 6246  | 708.83  | -12.381  | 2 R.IM+15.95 Splice@chr | 1.10E-10 | 0.002035 |
| 07Apr2011 | 9429  | 645.82  | 15.7131  | 2 K.NFPENSN chr1@1302   | 2.31E-10 | 0.002961 |
| 07Apr2011 | 5628  | 665.88  | -25.2158 | 2 _ILYYFLKIE chr3@2365  | 1.16E-10 | 0.001743 |
| 07Apr2011 | 10897 | 605.88  | -12.8149 | 2 _KVLHQVL chr2@1241    | 4.36E-10 | 0.00739  |

|           |       |         |          |                          |          |          |
|-----------|-------|---------|----------|--------------------------|----------|----------|
| 07Apr2011 | 11086 | 713.38  | -5.25494 | 3 _._DVGAILV Splice@chr  | 2.27E-10 | 0.003644 |
| 07Apr2011 | 11033 | 713.38  | -5.25494 | 3 _._DVGAILV Splice@chr  | 2.80E-10 | 0.004212 |
| 07Apr2011 | 11716 | 739.92  | -20.4021 | 2 R.KLLFTST Splice@chr   | 1.14E-10 | 0.002035 |
| 07Apr2011 | 1814  | 591.82  | 13.01688 | 2 K.KMFLTFH chr3@1345    | 2.46E-10 | 0.003535 |
| 07Apr2011 | 7170  | 576.29  | -4.34992 | 2 K.MSEAAG Splice@chr    | 2.15E-15 | 0        |
| 07Apr2011 | 7266  | 576.29  | -4.34992 | 2 K.MSEAAG chr4@3716     | 1.44E-15 | 0        |
| 07Apr2011 | 10628 | 736.43  | 4.456996 | 3 R.WDYFPKI Splice@chr   | 2.60E-11 | 4.88E-04 |
| 07Apr2011 | 15763 | 744.39  | -0.71794 | 4 K.FEIQILEQ chr5@1715   | 5.34E-10 | 0.008838 |
| 07Apr2011 | 13010 | 1040.58 | 11.97735 | 2 R.GMQLEV Splice@chr    | 1.78E-10 | 0.004817 |
| 07Apr2011 | 14727 | 478.24  | 12.21403 | 2 R.SMCVFRF chr4@1745    | 1.35E-10 | 0.002477 |
| 07Apr2011 | 9066  | 500.79  | -10.9299 | 2 R.PSLPFALC chr3@9992   | 6.09E-10 | 0.009476 |
| 07Apr2011 | 8257  | 500.79  | -10.9299 | 2 R.PSLPFALC chr3@9992   | 4.97E-10 | 0.008065 |
| 07Apr2011 | 4656  | 572.35  | -20.6994 | 3 R.NIVMIILV chr4@1930   | 3.55E-10 | 0.005426 |
| 07Apr2011 | 14219 | 527.27  | -29.2097 | 4 R.VFFSVSL1 chr2@1928   | 1.61E-10 | 0.002803 |
| 07Apr2011 | 2001  | 535.27  | 0.342726 | 2 R.QNYEFQI chr3@3618    | 2.49E-10 | 0.004938 |
| 07Apr2011 | 6446  | 981.49  | -1.55565 | 1 K.YVYFFNK chr2@5172    | 5.95E-10 | 0.008312 |
| 07Apr2011 | 12421 | 926.96  | -2.20822 | 2 L.QTK+14.C Splice@chr  | 2.16E-13 | 0        |
| 07Apr2011 | 11666 | 926.96  | -2.20822 | 2 L.QTK+14.C Splice@chr  | 6.42E-13 | 0        |
| 07Apr2011 | 11446 | 801     | -21.9724 | 2 _._K+14.016 chr4@5074  | 4.65E-10 | 0.007049 |
| 07Apr2011 | 2801  | 434.23  | -27.0217 | 3 K.LYRYSAK- chrX@1141   | 5.47E-10 | 0.008758 |
| 07Apr2011 | 13903 | 931.53  | 0.362106 | 2 R.CTLLYISQ chr4@2818   | 4.46E-10 | 0.008198 |
| 07Apr2011 | 11669 | 931.53  | 0.362106 | 2 R.CTLLYISQ chr4@2818   | 3.25E-10 | 0.006427 |
| 07Apr2011 | 9686  | 821.66  | 19.43717 | 4 R.FPM+15. chr5@1769    | 1.66E-10 | 0.00262  |
| 07Apr2011 | 5705  | 718.36  | -29.5233 | 2 S.VLETLDGI chr2@1557   | 3.28E-10 | 0.005151 |
| 07Apr2011 | 3500  | 679.83  | -24.276  | 2 R.K+14.016 chr1@1116   | 6.05E-10 | 0.009333 |
| 07Apr2011 | 9554  | 580.66  | 8.535221 | 3 M.MIRSEM Splice@chr    | 8.26E-11 | 0.001843 |
| 07Apr2011 | 17232 | 968.51  | -23.6218 | 3 R.FFYNIFAL chrX@4722   | 4.83E-11 | 0.001007 |
| 07Apr2011 | 13458 | 968.17  | -29.3651 | 3 R.FFYNIFAL chrX@4722   | 1.35E-10 | 0.004073 |
| 07Apr2011 | 13667 | 968.18  | -19.0158 | 3 R.FFYNIFAL chrX@4722   | 3.39E-10 | 0.006722 |
| 07Apr2011 | 15972 | 968.17  | -29.3651 | 3 R.FFYNIFAL chrX@4722   | 1.14E-10 | 0.002363 |
| 07Apr2011 | 17123 | 968.17  | -29.3651 | 3 R.FFYNIFAL chrX@4722   | 1.36E-10 | 0.001776 |
| 07Apr2011 | 11314 | 968.51  | -23.6218 | 3 R.FFYNIFAL chrX@4722   | 3.48E-10 | 0.006089 |
| 07Apr2011 | 14653 | 968.17  | -29.3651 | 3 R.FFYNIFAL chrX@4722   | 6.58E-10 | 0.009744 |
| 07Apr2011 | 14928 | 968.17  | -29.3651 | 3 R.FFYNIFAL chrX@4722   | 1.19E-10 | 0.001884 |
| 07Apr2011 | 12492 | 565.31  | -1.65846 | 3 K.IGVGAPD chr5@2575    | 6.30E-10 | 0.009536 |
| 07Apr2011 | 12985 | 565.32  | 16.07982 | 3 K.IGVGAPD chr5@2575    | 3.56E-11 | 8.10E-04 |
| 07Apr2011 | 9153  | 809.43  | 7.075612 | 3 R.QLTTLEI Splice@chr   | 4.48E-14 | 0        |
| 07Apr2011 | 12655 | 900.03  | 12.6957  | 2 Y.VKLSPAG chr2@7920    | 3.25E-10 | 0.009615 |
| 07Apr2011 | 7693  | 774.4   | -20.4909 | 2 K.IAK+14.0 chr5@3201   | 3.10E-10 | 0.005781 |
| 07Apr2011 | 13731 | 975.99  | -10.8299 | 2 R.QGLLQQI Splice@chr   | 3.23E-10 | 0.008654 |
| 07Apr2011 | 10265 | 742.38  | -26.3192 | 2 R.ETFISVEK chr5@7449   | 4.05E-10 | 0.006249 |
| 07Apr2011 | 8369  | 742.38  | -26.3192 | 2 R.ETFISVEK chr5@7449   | 3.46E-10 | 0.00598  |
| 07Apr2011 | 8713  | 742.38  | -26.3192 | 2 R.ETFISVEK chr5@7449   | 3.74E-11 | 8.10E-04 |
| 07Apr2011 | 8294  | 742.38  | -26.3192 | 2 R.ETFISVEK chr5@7449   | 4.53E-11 | 8.39E-04 |
| 07Apr2011 | 9627  | 858.48  | 6.006088 | 3 _._LETGIKPI Splice@chr | 2.92E-12 | 0        |
| 07Apr2011 | 1392  | 537.27  | -12.9748 | 2 R.EIFFFWG Splice@chr   | 3.26E-10 | 0.004416 |
| 07Apr2011 | 10794 | 996.49  | -22.685  | 2 K.SHCRSRF chr5@4504    | 2.67E-10 | 0.003614 |

|           |       |         |          |                          |          |          |
|-----------|-------|---------|----------|--------------------------|----------|----------|
| 07Apr2011 | 6468  | 831.39  | -27.5413 | 2 K.KFTFEIEE chrX@1364   | 1.66E-10 | 0.002317 |
| 07Apr2011 | 2034  | 493.61  | 28.00299 | 3 _..FQRHNLN chrX@1408   | 1.32E-10 | 0.001627 |
| 07Apr2011 | 6482  | 829.89  | -16.1259 | 2 R.FEVFEIEC chr4@7295   | 6.81E-10 | 0.009347 |
| 07Apr2011 | 6485  | 572.63  | 9.609873 | 3 K.IVLFQLFN chr3@1294   | 4.97E-10 | 0.006912 |
| 07Apr2011 | 12214 | 804.1   | 9.150142 | 3 R.QLTTLEI Splice@chr   | 5.96E-12 | 0        |
| 07Apr2011 | 7403  | 657.04  | -26.9179 | 3 R.GNVRK+1 chrX@7490    | 7.28E-11 | 9.39E-04 |
| 07Apr2011 | 10987 | 675.33  | -24.7716 | 2 K.IEMEFLVI chrX@1244   | 6.27E-10 | 0.008277 |
| 07Apr2011 | 6704  | 897.42  | -27.6753 | 3 _..QVREMH Splice@chr   | 3.43E-10 | 0.004536 |
| 07Apr2011 | 7944  | 833.93  | -9.2006  | 2 _..IIEPYVAV Splice@chr | 6.95E-10 | 0.008806 |
| 07Apr2011 | 10598 | 864.95  | 22.09183 | 2 R.KSSTLMR chr4@1655    | 3.18E-11 | 0        |
| 07Apr2011 | 10262 | 804.09  | -3.21782 | 3 R.QLTTLEI Splice@chr   | 9.65E-17 | 0        |
| 07Apr2011 | 4605  | 1116.65 | 11.05125 | 1 K.INLKVNSI chr2@7016   | 5.49E-10 | 0.006738 |
| 07Apr2011 | 8815  | 695.36  | -28.1907 | 2 H.QHYSLIK' Splice@chr  | 4.02E-10 | 0.004838 |
| 07Apr2011 | 7788  | 501.3   | -0.81333 | 3 K.FLVK+14. chrX@8948   | 5.91E-10 | 0.007105 |
| 07Apr2011 | 8000  | 833.93  | -9.2006  | 2 _..IIEPYVAV Splice@chr | 4.41E-10 | 0.005411 |
| 07Apr2011 | 6521  | 705.83  | -3.72364 | 2 M.PSMEEV chr5@4890     | 1.53E-15 | 0        |
| 07Apr2011 | 7039  | 554.26  | 6.682444 | 2 R.M+15.99 Splice@chr   | 7.93E-10 | 0.009526 |
| 07Apr2011 | 1551  | 493.61  | 28.00299 | 3 _..FQRHNLN chrX@1408   | 2.33E-10 | 0.002678 |
| 07Apr2011 | 6620  | 705.83  | -3.72364 | 2 M.PSMEEV chr5@4890     | 1.60E-15 | 0        |
| 07Apr2011 | 6621  | 851.48  | -15.2578 | 2 K.RGVRLSH chr2@2785    | 6.01E-10 | 0.007296 |
| 07Apr2011 | 8147  | 858.48  | 6.006088 | 3 _..LETGIKPI Splice@chr | 1.31E-12 | 0        |
| 07Apr2011 | 7109  | 660.7   | 6.141439 | 3 R.KIANKW/ chr3@2521    | 2.23E-10 | 0.002491 |
| 07Apr2011 | 11039 | 634.83  | -9.39461 | 2 R.VDIGDILF Splice@chr  | 1.13E-12 | 0        |
| 07Apr2011 | 6887  | 724.06  | 2.506414 | 3 R.NELEVFK chr1@1385    | 1.54E-10 | 0.002107 |
| 07Apr2011 | 6584  | 730.38  | -23.8587 | 3 K.DNVVNTI chr3@7825    | 2.19E-10 | 0.002491 |
| 07Apr2011 | 9306  | 872.95  | 24.83081 | 2 R.KSSTLM+ chr4@1655    | 2.73E-10 | 0.003074 |
| 07Apr2011 | 11878 | 916.98  | -20.1114 | 4 R.YEKVIIFN chr5@1391   | 3.60E-10 | 0.004244 |
| 07Apr2011 | 7466  | 578.83  | 0.845038 | 2 R.LSLPQGC Splice@chr   | 4.58E-10 | 0.005799 |
| 07Apr2011 | 5501  | 829.89  | -16.1259 | 2 R.FEVFEIEC chr4@7295   | 3.62E-10 | 0.004244 |
| 07Apr2011 | 5526  | 572.63  | 9.609873 | 3 K.IVLFQLFN chr3@1294   | 5.65E-10 | 0.007105 |
| 07Apr2011 | 6476  | 705.83  | -3.72364 | 2 M.PSMEEV chr5@4890     | 1.52E-15 | 0        |
| 07Apr2011 | 6572  | 705.83  | -3.72364 | 2 M.PSMEEV chr5@4890     | 1.50E-15 | 0        |
| 07Apr2011 | 6672  | 705.83  | -3.72364 | 2 M.PSMEEV chr5@4890     | 1.27E-12 | 0        |
| 07Apr2011 | 7889  | 607     | -9.70672 | 3 I.NRFNISK chrX@1250    | 1.71E-10 | 0.002305 |
| 07Apr2011 | 9797  | 742.88  | -6.21424 | 2 K.M+15.99 chr4@1648    | 4.92E-10 | 0.006179 |
| 07Apr2011 | 10901 | 900.03  | 12.6957  | 2 Y.VKLSPAG chr2@7920    | 5.59E-10 | 0.006929 |
| 07Apr2011 | 3939  | 1025.61 | -11.6755 | 1 K.LGLGSL chr5@4945     | 1.14E-11 | 0        |
| 07Apr2011 | 9935  | 996.99  | -24.37   | 2 K.SHCRSRF chr5@4504    | 1.72E-10 | 0.002233 |
| 07Apr2011 | 10693 | 926.96  | -2.20822 | 2 L.QTK+14.C Splice@chr  | 4.81E-13 | 2.04E-04 |
| 07Apr2011 | 7175  | 851.49  | -3.4814  | 2 K.RGVRLSH chr2@2785    | 1.13E-10 | 0.001897 |
| 07Apr2011 | 4884  | 509.77  | 14.99622 | 2 K.TDGNNEL chr1@1751    | 2.56E-10 | 0.003644 |
| 07Apr2011 | 11794 | 1118.57 | -6.04397 | 3 _..MRQTRSI chr1@1434   | 6.66E-10 | 0.00947  |
| 07Apr2011 | 7196  | 705.83  | -3.72364 | 2 M.PSMEEV chr5@4890     | 3.69E-15 | 0        |
| 07Apr2011 | 13356 | 916.98  | -20.1114 | 4 R.YEKVIIFN chr5@1391   | 1.01E-10 | 0.001541 |
| 07Apr2011 | 10587 | 643.68  | -9.56031 | 3 I.VSWWDN Splice@chr    | 2.57E-10 | 0.003644 |
| 07Apr2011 | 5034  | 1116.65 | 11.05125 | 1 K.INLKVNSI chr2@7016   | 5.43E-10 | 0.00799  |
| 07Apr2011 | 7974  | 578.84  | 18.16832 | 2 R.LSLPQGC Splice@chr   | 1.02E-11 | 2.04E-04 |

|           |       |         |          |                         |          |          |
|-----------|-------|---------|----------|-------------------------|----------|----------|
| 07Apr2011 | 6972  | 705.83  | -3.72364 | 2 M.PSMEEV chr5@4890    | 1.43E-15 | 0        |
| 07Apr2011 | 7127  | 851.49  | -3.4814  | 2 K.RGVRLSH chr2@2785   | 2.31E-10 | 0.003484 |
| 07Apr2011 | 9313  | 622.33  | 9.587405 | 2 R.AK+14.01 chr2@4270  | 4.64E-10 | 0.006499 |
| 07Apr2011 | 7140  | 705.83  | -3.72364 | 2 M.PSMEEV chr5@4890    | 1.92E-15 | 0        |
| 07Apr2011 | 7620  | 554.26  | 6.682444 | 2 R.M+15.99 Splice@chr  | 2.66E-10 | 0.004345 |
| 07Apr2011 | 12910 | 968.51  | -23.6218 | 3 R.FFYNIFAL chrX@4722  | 1.71E-10 | 0.002233 |
| 07Apr2011 | 4612  | 522.31  | -23.2988 | 2 C.PTLLPPLH chr2@1388  | 2.85E-10 | 0.004345 |
| 07Apr2011 | 8575  | 606.66  | -18.8783 | 3 I.NRFNISK chrX@1250   | 7.88E-11 | 0.001364 |
| 07Apr2011 | 11192 | 804.1   | 9.150142 | 3 R.QLTTLEI Splice@chr  | 4.67E-18 | 0        |
| 07Apr2011 | 7026  | 705.84  | 10.47814 | 2 M.PSMEEV chr5@4890    | 1.40E-15 | 0        |
| 07Apr2011 | 9338  | 833.42  | -19.2103 | 2 _IIEPYVAV Splice@chr  | 4.18E-10 | 0.006013 |
| 07Apr2011 | 9294  | 833.42  | -19.2103 | 2 _IIEPYVAV Splice@chr  | 4.93E-10 | 0.007018 |
| 07Apr2011 | 7681  | 660.7   | 6.141439 | 3 R.KIANKW/ chr3@2521   | 3.46E-10 | 0.00519  |
| 07Apr2011 | 8675  | 833.93  | -9.2006  | 2 _IIEPYVAV Splice@chr  | 2.25E-10 | 0.003311 |
| 07Apr2011 | 4007  | 608.3   | -9.42515 | 4 R.ESFNLNY chr3@9522   | 4.00E-10 | 0.005678 |
| 07Apr2011 | 3358  | 437.75  | -21.5911 | 2 R.ISVRNGT chr1@5907   | 2.93E-10 | 0.004345 |
| 07Apr2011 | 5871  | 1051.15 | 14.87916 | 3 E.GGDWSH Splice@chr   | 9.37E-11 | 0.001541 |
| 07Apr2011 | 7086  | 705.83  | -3.72364 | 2 M.PSMEEV chr5@4890    | 1.77E-15 | 0        |
| 07Apr2011 | 11305 | 1028.99 | -16.6017 | 2 R.SQMDILC chrX@1399   | 6.20E-11 | 9.86E-04 |
| 07Apr2011 | 11545 | 864.95  | 22.09183 | 2 R.KSSTLMR chr4@1655   | 9.55E-11 | 0.001541 |
| 07Apr2011 | 5858  | 512.27  | 9.502328 | 2 R.ICTTATID chr5@1130  | 6.30E-11 | 9.86E-04 |
| 07Apr2011 | 13000 | 1147.25 | 13.44098 | 3 R.FQSAAG Splice@chr   | 1.11E-11 | 2.04E-04 |
| 07Apr2011 | 8585  | 855.91  | -24.1079 | 2 _HVQEVAI Splice@chr   | 3.67E-14 | 0        |
| 07Apr2011 | 4371  | 677.95  | 22.60469 | 2 R.QLKVIGR chrX@3498   | 6.17E-10 | 0.008485 |
| 07Apr2011 | 4056  | 476.73  | -8.21113 | 2 R.SSHEISHF chr5@1494  | 1.36E-10 | 0.003029 |
| 07Apr2011 | 4533  | 1017.59 | -22.5744 | 1 R.SSVIMLIV chr2@5767  | 1.88E-11 | 9.35E-04 |
| 07Apr2011 | 4517  | 509.8   | -23.773  | 2 R.SSVIMLIV chr2@5767  | 5.33E-11 | 0.001367 |
| 07Apr2011 | 3328  | 529.6   | -12.9775 | 3 _AFHESKLI chrX@3409   | 8.17E-11 | 0.002232 |
| 07Apr2011 | 4662  | 509.3   | -20.473  | 2 R.SSVIMLIV chr2@5767  | 6.08E-11 | 0.001367 |
| 07Apr2011 | 966   | 452.23  | -1.48793 | 2 R.SGEPLSA Splice@chr  | 4.12E-11 | 9.35E-04 |
| 07Apr2011 | 8419  | 996.49  | -22.685  | 2 K.SHCRSRF chr5@4504   | 1.43E-10 | 0.003447 |
| 07Apr2011 | 4580  | 1017.59 | -22.5744 | 1 R.SSVIMLIV chr2@5767  | 1.88E-11 | 9.35E-04 |
| 07Apr2011 | 4760  | 572.97  | 19.25659 | 3 K.IVLFQLFN chr3@1294  | 5.36E-11 | 0.001367 |
| 07Apr2011 | 4765  | 509.3   | -20.473  | 2 R.SSVIMLIV chr2@5767  | 6.69E-11 | 0.001367 |
| 07Apr2011 | 5375  | 470.22  | -15.5443 | 4 E.FGRYGM chrX@7593    | 4.19E-11 | 9.35E-04 |
| 07Apr2011 | 4561  | 509.3   | -20.473  | 2 R.SSVIMLIV chr2@5767  | 6.52E-11 | 0.001367 |
| 07Apr2011 | 3263  | 1025.61 | -11.6755 | 1 K.LGLGSGL chr5@4945   | 3.98E-11 | 9.35E-04 |
| 07Apr2011 | 9696  | 864.95  | 22.09183 | 2 R.KSSTLMR chr4@1655   | 2.58E-11 | 9.35E-04 |
| 07Apr2011 | 7479  | 858.47  | -5.67211 | 3 _LETGIKPI Splice@chr  | 2.04E-13 | 0        |
| 07Apr2011 | 5767  | 705.83  | -3.72364 | 2 M.PSMEEV chr5@4890    | 1.59E-14 | 0        |
| 07Apr2011 | 8603  | 974.02  | -8.56562 | 2 E.LMENQV chr1@3654    | 1.03E-10 | 0.002612 |
| 07Apr2011 | 4612  | 509.3   | -20.473  | 2 R.SSVIMLIV chr2@5767  | 5.14E-11 | 0.001367 |
| 07Apr2011 | 4711  | 509.3   | -20.473  | 2 R.SSVIMLIV chr2@5767  | 7.66E-11 | 0.002232 |
| 07Apr2011 | 1919  | 936.48  | 27.86052 | 1 K.LNGGYEC chr2@1191   | 3.99E-11 | 5.50E-04 |
| 07Apr2011 | 750   | 562.31  | -13.4391 | 2 R.FYLLLYLK Splice@chr | 4.82E-11 | 5.50E-04 |
| 07Apr2011 | 6740  | 618.32  | 9.392969 | 2 _ICSK+14.( chr2@7590  | 2.68E-11 | 5.50E-04 |
| 07Apr2011 | 1980  | 620.85  | 23.40758 | 2 C.QLTALGA chr4@7065   | 5.62E-10 | 0.00933  |

|           |       |         |          |                          |          |          |
|-----------|-------|---------|----------|--------------------------|----------|----------|
| 07Apr2011 | 1187  | 493.61  | 28.00299 | 3 _ .FQRHNLN chrX@1408   | 4.16E-10 | 0.007303 |
| 07Apr2011 | 9694  | 968.13  | 18.26018 | 3 _ .GCSIVPIS Splice@chr | 4.87E-10 | 0.008436 |
| 07Apr2011 | 7265  | 938.46  | 22.50833 | 2 R.ECSQSDS chr2@8876    | 5.43E-10 | 0.00933  |
| 07Apr2011 | 5833  | 671.87  | -26.5383 | 2 T.FNIVHTQ Splice@chr   | 4.55E-10 | 0.007729 |
| 07Apr2011 | 6091  | 554.26  | 6.682444 | 2 R.M+15.99 Splice@chr   | 2.06E-10 | 0.003314 |
| 07Apr2011 | 1123  | 493.61  | 28.00299 | 3 _ .FQRHNLN chrX@1408   | 3.34E-10 | 0.005682 |
| 07Apr2011 | 5697  | 851.49  | -3.4814  | 2 K.RGVRLSH chr2@2785    | 3.63E-10 | 0.005916 |
| 07Apr2011 | 7009  | 833.93  | -9.2006  | 2 _ .IIEPYVAV Splice@chr | 2.57E-10 | 0.004279 |
| 07Apr2011 | 8190  | 473.57  | -23.6784 | 3 R.TSFHSSL5 chr5@5498   | 5.45E-10 | 0.00933  |
| 07Apr2011 | 3804  | 1116.65 | 11.05125 | 1 K.INLKVNSI chr2@7016   | 2.93E-10 | 0.004979 |
| 07Apr2011 | 9393  | 1118.57 | -6.04397 | 3 _ .MRQTRSI chr1@1434   | 3.84E-10 | 0.006629 |
| 07Apr2011 | 6224  | 742.38  | -26.3192 | 2 R.ETFISVEK chr5@7449   | 2.18E-10 | 0.003314 |
| 07Apr2011 | 7135  | 858.48  | 6.006088 | 3 _ .LETGIKPI Splice@chr | 3.03E-13 | 0        |
| 07Apr2011 | 7176  | 858.48  | 6.006088 | 3 _ .LETGIKPI Splice@chr | 1.63E-13 | 0        |
| 07Apr2011 | 5879  | 671.37  | -24.0361 | 2 T.FNIVHTQ Splice@chr   | 5.47E-10 | 0.00933  |
| 07Apr2011 | 2013  | 620.85  | 23.40758 | 2 C.QLTALGA chr4@7065    | 2.88E-10 | 0.004979 |
| 07Apr2011 | 2434  | 693.87  | -6.6949  | 2 V.ICVAVGD chr5@1063    | 1.67E-10 | 0.002574 |
| 07Apr2011 | 5689  | 730.38  | -23.8587 | 3 K.DNVVNTI chr3@7825    | 4.77E-10 | 0.007967 |
| 07Apr2011 | 9027  | 1028.99 | -16.6017 | 2 R.SQMDILC chrX@1399    | 3.10E-10 | 0.005682 |
| 07Apr2011 | 9196  | 864.95  | 22.09183 | 2 R.KSSTLMR chr4@1655    | 1.36E-11 | 2.94E-04 |
| 07Apr2011 | 9224  | 864.95  | 22.09183 | 2 R.KSSTLMR chr4@1655    | 2.63E-11 | 5.50E-04 |
| 07Apr2011 | 5960  | 1111.11 | -2.0893  | 2 R.LLM+15.5 chr4@3284   | 3.07E-10 | 0.005682 |
| 07Apr2011 | 10259 | 833.93  | -9.2006  | 2 _ .IIEPYVAV Splice@chr | 2.48E-10 | 0.004811 |
| 07Apr2011 | 10204 | 833.93  | -9.2006  | 2 _ .IIEPYVAV Splice@chr | 2.23E-10 | 0.004636 |
| 07Apr2011 | 12883 | 732.07  | 19.51873 | 3 R.ATDDWII Splice@chr   | 2.33E-10 | 0.004636 |
| 07Apr2011 | 12843 | 731.74  | 25.61531 | 3 R.ATDDWII Splice@chr   | 2.23E-11 | 9.18E-04 |
| 07Apr2011 | 6858  | 509.8   | -23.773  | 2 R.SSVIMLIV chr2@5767   | 4.54E-11 | 0.001305 |
| 07Apr2011 | 1296  | 562.31  | -13.4391 | 2 R.FYLLYLYK Splice@chr  | 4.84E-11 | 0.001305 |
| 07Apr2011 | 10465 | 858.47  | -5.67211 | 3 _ .LETGIKPI Splice@chr | 1.21E-11 | 2.42E-04 |
| 07Apr2011 | 8411  | 583.82  | -28.5596 | 2 R.LVPITFS chr1@2422    | 2.99E-10 | 0.006338 |
| 07Apr2011 | 6916  | 509.3   | -20.473  | 2 R.SSVIMLIV chr2@5767   | 5.12E-11 | 0.001305 |
| 07Apr2011 | 10356 | 835.92  | -2.26621 | 2 T.MRCVGK chrX@1194     | 3.55E-10 | 0.008412 |
| 07Apr2011 | 1326  | 562.31  | -13.4391 | 2 R.FYLLYLYK Splice@chr  | 5.26E-11 | 0.001305 |
| 07Apr2011 | 10554 | 762.43  | 16.40509 | 2 _ .MK+14.0 chr4@7749   | 3.53E-10 | 0.008412 |
| 07Apr2011 | 7362  | 897.42  | -27.6753 | 3 _ .QVREMH Splice@chr   | 2.92E-10 | 0.006338 |
| 07Apr2011 | 6271  | 628.32  | 10.85905 | 2 R.ISYQAMA Splice@chr   | 2.23E-10 | 0.004636 |
| 07Apr2011 | 5733  | 476.73  | -8.21113 | 2 R.SSHEISHF chr5@1494   | 1.96E-10 | 0.003468 |
| 07Apr2011 | 6807  | 509.8   | -23.773  | 2 R.SSVIMLIV chr2@5767   | 1.88E-11 | 7.15E-04 |
| 07Apr2011 | 11223 | 759.4   | -15.0495 | 2 K.FIDANLQ chr4@8206    | 3.35E-10 | 0.007062 |
| 07Apr2011 | 881   | 420.68  | -22.1784 | 2 R.MMTGTG chrX@9534     | 2.37E-11 | 9.18E-04 |
| 07Apr2011 | 910   | 420.68  | -22.1784 | 2 R.MMTGTG chrX@9534     | 2.42E-11 | 9.18E-04 |
| 07Apr2011 | 10414 | 858.48  | 6.006088 | 3 _ .LETGIKPI Splice@chr | 5.01E-11 | 0.001305 |
| 07Apr2011 | 10997 | 490.74  | -7.60235 | 2 K.DITMEIM chr3@1481    | 3.08E-10 | 0.006518 |
| 07Apr2011 | 8691  | 851.49  | -3.4814  | 2 K.RGVRLSH chr2@2785    | 1.32E-10 | 0.002508 |
| 07Apr2011 | 12272 | 864.95  | 22.09183 | 2 R.KSSTLMR chr4@1655    | 1.55E-10 | 0.004359 |
| 07Apr2011 | 6296  | 509.3   | -20.473  | 2 R.SSVIMLIV chr2@5767   | 5.77E-11 | 0.00146  |
| 07Apr2011 | 12249 | 864.95  | 22.09183 | 2 R.KSSTLMR chr4@1655    | 4.11E-12 | 0        |

|           |       |         |          |                         |          |          |
|-----------|-------|---------|----------|-------------------------|----------|----------|
| 07Apr2011 | 9889  | 999.49  | -11.7107 | 2 R.QVSEFFD Splice@chr  | 3.09E-10 | 0.0092   |
| 07Apr2011 | 6133  | 509.3   | -20.473  | 2 R.SSVIMLIV chr2@5767  | 3.76E-11 | 0.00146  |
| 07Apr2011 | 1876  | 493.61  | 28.00299 | 3 _FQRHNL chrX@1408     | 2.88E-10 | 0.007944 |
| 07Apr2011 | 6244  | 509.3   | -20.473  | 2 R.SSVIMLIV chr2@5767  | 4.29E-11 | 0.00146  |
| 07Apr2011 | 5322  | 476.73  | -8.21113 | 2 R.SSHEISHF chr5@1494  | 2.75E-10 | 0.007738 |
| 07Apr2011 | 6082  | 509.3   | -20.473  | 2 R.SSVIMLIV chr2@5767  | 1.39E-10 | 0.004151 |
| 07Apr2011 | 11566 | 732.07  | 19.51873 | 3 R.ATDDWII Splice@chr  | 3.13E-10 | 0.0092   |
| 07Apr2011 | 1171  | 562.31  | -13.4391 | 2 R.FYLLYLYK Splice@chr | 5.02E-11 | 0.00146  |
| 07Apr2011 | 6186  | 509.3   | -20.473  | 2 R.SSVIMLIV chr2@5767  | 3.76E-11 | 0.00146  |
| 07Apr2011 | 712   | 452.73  | -5.20537 | 2 R.SGEPLSA: Splice@chr | 2.59E-11 | 5.15E-04 |
| 07Apr2011 | 7949  | 748.73  | -12.625  | 3 R.LPSKENL chr4@5639   | 1.72E-10 | 0.005006 |
| 07Apr2011 | 6497  | 831.39  | -27.5413 | 2 K.KFTFEIEE chrX@1364  | 9.65E-12 | 0        |
| 07Apr2011 | 9403  | 858.48  | 6.006088 | 3 _LETGIIPi Splice@chr  | 1.64E-13 | 0        |
| 07Apr2011 | 9210  | 833.93  | -9.2006  | 2 _IIEPYVAV Splice@chr  | 7.17E-11 | 0.001684 |
| 07Apr2011 | 3975  | 493.78  | -11.3951 | 2 R.KNQENLI Splice@chr  | 3.00E-10 | 0.009019 |
| 07Apr2011 | 2159  | 626.82  | -18.5922 | 2 W.QFDLGK Splice@chr   | 2.23E-10 | 0.005817 |
| 07Apr2011 | 3786  | 693.87  | -6.6949  | 2 V.ICVAVGD chr5@1063   | 7.30E-12 | 0        |
| 07Apr2011 | 3060  | 519.6   | -26.5197 | 3 K.IGSM+15 chr5@1654   | 3.80E-11 | 0.00146  |
| 07Apr2011 | 12242 | 1003.18 | 7.145987 | 3 R.CWNRRA Splice@chr   | 2.01E-12 | 0        |
| 07Apr2011 | 1131  | 562.31  | -13.4391 | 2 R.FYLLYLYK Splice@chr | 5.44E-11 | 0.00146  |
| 07Apr2011 | 6153  | 1017.59 | -22.5744 | 1 R.SSVIMLIV chr2@5767  | 1.88E-11 | 2.60E-04 |
| 07Apr2011 | 5742  | 636.33  | -6.96881 | 2 R.LAATKEN chr1@2521   | 1.62E-10 | 0.004809 |
| 07Apr2011 | 4531  | 677.95  | 22.60469 | 2 R.QLKVIGR chrX@3498   | 8.83E-11 | 0.002631 |
| 07Apr2011 | 8693  | 945.95  | -25.2346 | 2 K.FSKKNMI chr4@1701   | 1.15E-10 | 0.003507 |
| 07Apr2011 | 1139  | 443.28  | 12.69649 | 2 K.LLESAPK chr4@1589   | 3.18E-10 | 0.0092   |
| 07Apr2011 | 704   | 420.68  | -22.1784 | 2 R.MMTGTG chrX@9534    | 5.97E-12 | 0        |
| 07Apr2011 | 7776  | 748.73  | -12.625  | 3 R.LPSKENL chr4@5639   | 1.60E-10 | 0.004582 |
| 07Apr2011 | 7905  | 606.86  | 28.10799 | 2 R.VLPTVFY, chr5@1167  | 1.12E-10 | 0.003507 |
| 07Apr2011 | 7744  | 851.48  | -15.2578 | 2 K.RGVRLSH chr2@2789   | 2.91E-10 | 0.008162 |
| 07Apr2011 | 743   | 452.73  | -5.20537 | 2 R.SGEPLSA: Splice@chr | 5.00E-11 | 0.00146  |
| 07Apr2011 | 764   | 420.68  | -22.1784 | 2 R.MMTGTG chrX@9534    | 2.80E-11 | 7.70E-04 |
| 07Apr2011 | 3510  | 437.75  | -21.5911 | 2 R.ISVRNGT chr1@5907   | 3.00E-10 | 0.009019 |
| 07Apr2011 | 779   | 452.23  | -1.48793 | 2 R.SGEPLSA: Splice@chr | 1.81E-10 | 0.005213 |
| 07Apr2011 | 7896  | 748.73  | -12.625  | 3 R.LPSKENL chr4@5639   | 1.42E-10 | 0.004151 |
| 07Apr2011 | 1706  | 493.61  | 28.00299 | 3 _FQRHNL chrX@1408     | 3.41E-11 | 4.26E-04 |
| 07Apr2011 | 7364  | 660.37  | 12.83612 | 3 R.KIANKW chr3@2521    | 2.37E-10 | 0.005528 |
| 07Apr2011 | 5618  | 509.3   | -20.473  | 2 R.SSVIMLIV chr2@5767  | 4.40E-11 | 4.26E-04 |
| 07Apr2011 | 7323  | 554.26  | 6.682444 | 2 R.M+15.99 Splice@chr  | 4.05E-10 | 0.008739 |
| 07Apr2011 | 8791  | 516.3   | 4.106203 | 3 R.NIIFLMVI chrX@1294  | 1.92E-10 | 0.005047 |
| 07Apr2011 | 3196  | 693.87  | -6.6949  | 2 V.ICVAVGD chr5@1063   | 2.12E-10 | 0.005214 |
| 07Apr2011 | 5560  | 509.3   | -20.473  | 2 R.SSVIMLIV chr2@5767  | 1.37E-10 | 0.002986 |
| 07Apr2011 | 931   | 562.31  | -13.4391 | 2 R.FYLLYLYK Splice@chr | 5.05E-11 | 6.36E-04 |
| 07Apr2011 | 10879 | 876.39  | -6.29995 | 3 K.GCSSNLE chr2@8466   | 5.38E-10 | 0.009845 |
| 07Apr2011 | 5557  | 1017.59 | -22.5744 | 1 R.SSVIMLIV chr2@5767  | 1.27E-10 | 0.002599 |
| 07Apr2011 | 6923  | 851.48  | -15.2578 | 2 K.RGVRLSH chr2@2789   | 1.68E-10 | 0.004322 |
| 07Apr2011 | 6924  | 748.73  | -12.625  | 3 R.LPSKENL chr4@5639   | 1.92E-10 | 0.005047 |
| 07Apr2011 | 9489  | 918.53  | -15.8984 | 1 K.SSLMVIIR chr4@1212  | 4.26E-10 | 0.008904 |

|           |       |         |          |                         |          |          |
|-----------|-------|---------|----------|-------------------------|----------|----------|
| 07Apr2011 | 3419  | 434.24  | 13.9946  | 3 _RSNDQTI chr5@6378    | 5.14E-10 | 0.009327 |
| 07Apr2011 | 6339  | 626.31  | 6.247018 | 2 K.SEELMYN chr4@2675   | 9.97E-14 | 0        |
| 07Apr2011 | 5544  | 646.67  | -3.90727 | 3 K.TKRLNGS chrX@1090   | 4.62E-10 | 0.009166 |
| 07Apr2011 | 5691  | 1051.15 | 14.87916 | 3 E.GGDWSH Splice@chr   | 5.88E-13 | 0        |
| 07Apr2011 | 11212 | 864.95  | 22.09183 | 2 R.KSSTLMR chr4@1655   | 1.45E-10 | 0.00377  |
| 07Apr2011 | 2612  | 620.85  | 23.40758 | 2 C.QLTALGA chr4@7065   | 1.42E-10 | 0.003576 |
| 07Apr2011 | 8478  | 858.48  | 6.006088 | 3 _LETGIKPI Splice@chr  | 1.00E-13 | 0        |
| 07Apr2011 | 11789 | 634.84  | 6.410455 | 2 R.VDIGDILF Splice@chr | 7.19E-13 | 0        |
| 07Apr2011 | 659   | 420.68  | -22.1784 | 2 R.MMTGTG chrX@9534    | 4.23E-12 | 2.38E-04 |
| 07Apr2011 | 6839  | 730.38  | -23.8587 | 3 K.DNVVNTI chr3@7825   | 2.09E-10 | 0.005214 |
| 07Apr2011 | 10718 | 750.38  | -16.0136 | 2 V.SWQILFN Splice@chr  | 2.05E-10 | 0.005214 |
| 07Apr2011 | 1627  | 520.28  | 4.06113  | 2 K.IMFQFQF chr5@6375   | 5.14E-10 | 0.009327 |
| 07Apr2011 | 5794  | 440.24  | 24.04044 | 2 R.YNRAPM chr5@4305    | 2.02E-10 | 0.005214 |
| 07Apr2011 | 7318  | 660.7   | 6.141439 | 3 R.KIANKW chr3@2521    | 4.06E-10 | 0.008739 |
| 07Apr2011 | 5639  | 1051.14 | 5.269702 | 3 E.GGDWSH Splice@chr   | 6.36E-12 | 2.38E-04 |
| 07Apr2011 | 7092  | 671.37  | -24.0361 | 2 T.FNIVHTQ Splice@chr  | 9.20E-11 | 0.001635 |
| 07Apr2011 | 11174 | 864.95  | 22.09183 | 2 R.KSSTLMR chr4@1655   | 7.10E-11 | 8.29E-04 |
| 07Apr2011 | 2074  | 423.21  | -13.0106 | 2 K.YLFSGMK chr5@8268   | 3.70E-10 | 0.007864 |
| 07Apr2011 | 12534 | 962.8   | 16.16136 | 3 _CSIRPISG Splice@chr  | 1.80E-10 | 0.004691 |
| 07Apr2011 | 9168  | 759.4   | -15.0495 | 2 K.FIDANLQ chr4@8206   | 3.99E-10 | 0.008739 |
| 07Apr2011 | 10816 | 804.09  | -3.21782 | 3 R.QLTTLEI Splice@chr  | 1.22E-12 | 0        |
| 07Apr2011 | 8425  | 858.48  | 6.006088 | 3 _LETGIKPI Splice@chr  | 6.88E-11 | 8.29E-04 |
| 07Apr2011 | 2566  | 620.85  | 23.40758 | 2 C.QLTALGA chr4@7065   | 1.81E-10 | 0.004691 |
| 07Apr2011 | 9732  | 675.33  | -24.7716 | 2 K.IEMEFLVI chrX@1244  | 2.59E-10 | 0.005528 |
| 07Apr2011 | 5836  | 831.39  | -27.5413 | 2 K.KFTFEIEE chrX@1364  | 7.19E-11 | 8.29E-04 |
| 07Apr2011 | 896   | 687.4   | -22.3188 | 1 K.KGANLGI chr2@4658   | 9.82E-10 | 0.009972 |
| 07Apr2011 | 1545  | 493.61  | 28.00299 | 3 _FQRHNLN chrX@1408    | 5.85E-11 | 0        |
| 07Apr2011 | 1498  | 493.61  | 28.00299 | 3 _FQRHNLN chrX@1408    | 3.59E-10 | 0.0059   |
| 07Apr2011 | 840   | 562.31  | -13.4391 | 2 R.FYLLYLYK Splice@chr | 5.21E-11 | 0        |
| 07Apr2011 | 1392  | 536.29  | -10.9462 | 2 _QVEFNPI Splice@chr   | 7.26E-10 | 0.007289 |
| 07Apr2011 | 997   | 537.27  | -12.9748 | 2 R.EIFFFWG Splice@chr  | 2.60E-10 | 0.004878 |
| 07Apr2011 | 1591  | 493.61  | 28.00299 | 3 _FQRHNLN chrX@1408    | 3.48E-10 | 0.0059   |
| 07Apr2011 | 592   | 420.68  | -22.1784 | 2 R.MMTGTG chrX@9534    | 5.63E-12 | 0        |
| 07Apr2011 | 789   | 562.31  | -13.4391 | 2 R.FYLLYLYK Splice@chr | 4.73E-11 | 0        |
| 07Apr2011 | 608   | 562.31  | -13.4391 | 2 R.FYLLYLYK Splice@chr | 4.82E-11 | 0        |
| 07Apr2011 | 653   | 687.41  | -7.82493 | 1 K.KGANLGI chr2@4658   | 1.30E-09 | 0.007979 |
| 07Apr2011 | 590   | 764.39  | 8.635064 | 2 F.EGESQCL chr5@1706   | 7.44E-10 | 0.005556 |
| 07Apr2011 | 497   | 420.68  | -22.1784 | 2 R.MMTGTG chrX@9534    | 8.13E-12 | 0        |
| 07Apr2011 | 487   | 420.68  | -22.1784 | 2 R.MMTGTG chrX@9534    | 3.82E-12 | 0        |
| 07Apr2011 | 8882  | 664.7   | 1.197202 | 3 _PTLNK+1 chr1@6526    | 1.74E-11 | 2.27E-04 |
| 07Apr2011 | 2519  | 620.85  | 23.40758 | 2 C.QLTALGA chr4@7065   | 2.25E-10 | 0.005447 |
| 07Apr2011 | 12124 | 818.44  | -11.6911 | 2 K.RTIVSVRI chrX@8304  | 4.45E-10 | 0.00968  |
| 07Apr2011 | 12604 | 962.47  | -16.0654 | 3 R.WFWGQI chr4@3030    | 3.22E-10 | 0.007584 |
| 07Apr2011 | 8944  | 653.89  | -28.8863 | 2 K.NKLLKSY chr3@1375   | 1.19E-10 | 0.002837 |
| 07Apr2011 | 5747  | 1051.48 | 10.55946 | 3 E.GGDWSH Splice@chr   | 8.06E-15 | 0        |
| 07Apr2011 | 7133  | 851.48  | -15.2578 | 2 K.RGVRLSH chr2@2785   | 3.33E-10 | 0.007761 |
| 07Apr2011 | 7181  | 671.87  | -26.5383 | 2 T.FNIVHTQ Splice@chr  | 3.46E-10 | 0.00831  |

|           |       |         |          |                          |          |          |
|-----------|-------|---------|----------|--------------------------|----------|----------|
| 07Apr2011 | 865   | 562.31  | -13.4391 | 2 R.FYLLYLYK Splice@chr  | 4.91E-11 | 0.001068 |
| 07Apr2011 | 8571  | 833.93  | -9.2006  | 2 _..IIEPYVAV Splice@chr | 2.45E-10 | 0.006003 |
| 07Apr2011 | 8835  | 858.48  | 6.006088 | 3 _..LETGIKPI Splice@chr | 3.05E-12 | 0        |
| 07Apr2011 | 8701  | 835.92  | -2.26621 | 2 T.MRCVGK chrX@1194     | 4.02E-10 | 0.008624 |
| 07Apr2011 | 5959  | 831.39  | -27.5413 | 2 K.KFTFEIEE chrX@1364   | 2.17E-11 | 2.27E-04 |
| 07Apr2011 | 7079  | 851.49  | -3.4814  | 2 K.RGVRLSH chr2@2785    | 1.85E-10 | 0.004332 |
| 07Apr2011 | 6868  | 472.29  | -0.64754 | 2 _..SPLFVPKf chrX@4402  | 1.37E-10 | 0.003389 |
| 07Apr2011 | 5865  | 572.63  | 9.609873 | 3 K.IVLFQLFN chr3@1294   | 1.40E-10 | 0.003389 |
| 07Apr2011 | 8783  | 858.48  | 6.006088 | 3 _..LETGIKPI Splice@chr | 5.69E-13 | 0        |
| 07Apr2011 | 9952  | 996.49  | -22.685  | 2 K.SHCRSRF chr5@4504    | 1.00E-10 | 0.00205  |
| 07Apr2011 | 8933  | 664.7   | 1.197202 | 3 _..PTLNK+1. chr1@6526  | 2.56E-10 | 0.006533 |
| 07Apr2011 | 9511  | 759.4   | -15.0495 | 2 K.FIDANLQ chr4@8206    | 1.64E-10 | 0.003964 |
| 07Apr2011 | 1469  | 493.94  | 19.04183 | 3 _..FQRHNLN chrX@1408   | 2.78E-10 | 0.00723  |
| 07Apr2011 | 11403 | 1003.19 | 17.13413 | 3 R.CWNRRA Splice@chr    | 1.07E-11 | 2.27E-04 |
| 07Apr2011 | 5715  | 509.8   | -23.773  | 2 R.SSVIMLIV chr2@5767   | 4.23E-11 | 8.69E-04 |
| 07Apr2011 | 8752  | 835.92  | -2.26621 | 2 T.MRCVGK chrX@1194     | 4.54E-10 | 0.009851 |
| 07Apr2011 | 3488  | 493.78  | -11.3951 | 2 R.KNQENLI Splice@chr   | 2.80E-10 | 0.00723  |
| 07Apr2011 | 11479 | 864.95  | 22.09183 | 2 R.KSSTLMR chr4@1655    | 6.36E-11 | 0.001456 |
| 07Apr2011 | 11447 | 864.95  | 22.09183 | 2 R.KSSTLMR chr4@1655    | 3.94E-11 | 8.69E-04 |
| 07Apr2011 | 12561 | 911.42  | 20.49399 | 2 _..PRM+15. Splice@chr  | 3.00E-10 | 0.00723  |
| 07Apr2011 | 8735  | 858.48  | 6.006088 | 3 _..LETGIKPI Splice@chr | 3.32E-13 | 0        |
| 07Apr2011 | 2584  | 620.85  | 23.40758 | 2 C.QLTALGA chr4@7065    | 2.56E-10 | 0.006533 |
| 07Apr2011 | 6300  | 833.93  | -9.2006  | 2 _..IIEPYVAV Splice@chr | 2.78E-11 | 0.001036 |
| 07Apr2011 | 2145  | 475.76  | 18.38472 | 2 R.VGIADNF chr5@9964    | 9.12E-11 | 0.002464 |
| 07Apr2011 | 5077  | 705.83  | -3.72364 | 2 M.PSMEEV chr5@4890     | 1.64E-15 | 0        |
| 07Apr2011 | 7456  | 675.33  | -24.7716 | 2 K.IEMEFLVI chrX@1244   | 1.24E-10 | 0.002464 |
| 07Apr2011 | 5753  | 671.37  | -24.0361 | 2 T.FNIVHTQ Splice@chr   | 1.28E-10 | 0.002464 |
| 07Apr2011 | 6523  | 664.36  | -7.23808 | 3 _..PTLNK+1. chr1@6526  | 3.11E-10 | 0.006338 |
| 07Apr2011 | 2286  | 475.76  | 18.38472 | 2 R.VGIADNF chr5@9964    | 4.88E-10 | 0.009369 |
| 07Apr2011 | 6802  | 833.42  | -19.2103 | 2 _..IIEPYVAV Splice@chr | 3.53E-10 | 0.007473 |
| 07Apr2011 | 6426  | 858.48  | 6.006088 | 3 _..LETGIKPI Splice@chr | 2.95E-11 | 0.001036 |
| 07Apr2011 | 5653  | 671.37  | -24.0361 | 2 T.FNIVHTQ Splice@chr   | 3.67E-10 | 0.008115 |
| 07Apr2011 | 2387  | 475.76  | 18.38472 | 2 R.VGIADNF chr5@9964    | 2.09E-10 | 0.004577 |
| 07Apr2011 | 3823  | 574.8   | 12.19222 | 2 R.WEVTSE( chr5@1925    | 5.04E-10 | 0.009815 |
| 07Apr2011 | 4037  | 829.89  | -16.1259 | 2 R.FEVFEIEC chr4@7295   | 4.55E-10 | 0.009164 |
| 07Apr2011 | 5035  | 705.83  | -3.72364 | 2 M.PSMEEV chr5@4890     | 1.72E-15 | 0        |
| 07Apr2011 | 8083  | 732.07  | 19.51873 | 3 R.ATDDWII Splice@chr   | 2.02E-11 | 5.49E-04 |
| 07Apr2011 | 5585  | 742.38  | -26.3192 | 2 R.ETFISVEK chr5@7445   | 2.26E-10 | 0.0048   |
| 07Apr2011 | 7073  | 750.04  | -6.49357 | 3 R.SRK+14.C chr5@1927   | 2.60E-10 | 0.004999 |
| 07Apr2011 | 9151  | 634.84  | 6.410455 | 2 R.VDIGDILF Splice@chr  | 4.10E-13 | 2.88E-04 |
| 07Apr2011 | 2502  | 475.76  | 18.38472 | 2 R.VGIADNF chr5@9964    | 1.08E-10 | 0.002464 |
| 07Apr2011 | 8658  | 864.95  | 22.09183 | 2 R.KSSTLMR chr4@1655    | 1.65E-11 | 5.49E-04 |
| 07Apr2011 | 2786  | 1025.61 | -11.6755 | 1 K.LGLGSGL chr5@4945    | 1.47E-11 | 5.49E-04 |
| 07Apr2011 | 5330  | 671.37  | -24.0361 | 2 T.FNIVHTQ Splice@chr   | 2.75E-10 | 0.005697 |
| 07Apr2011 | 8409  | 785.06  | -22.2115 | 3 _..NLQGEAL chr5@5904   | 4.54E-10 | 0.009164 |
| 07Apr2011 | 7502  | 872.95  | 24.83081 | 2 R.KSSTLM+ chr4@1655    | 3.20E-10 | 0.006338 |
| 07Apr2011 | 575   | 562.31  | -13.4391 | 2 R.FYLLYLYK Splice@chr  | 4.73E-11 | 0.001036 |

|           |       |         |          |                          |          |          |
|-----------|-------|---------|----------|--------------------------|----------|----------|
| 07Apr2011 | 6457  | 608.33  | 9.446977 | 2 K.MPLVGVl Splice@chr   | 1.26E-14 | 0        |
| 07Apr2011 | 6476  | 858.48  | 6.006088 | 3 _..LETGIKPI Splice@chr | 4.73E-11 | 0.001036 |
| 07Apr2011 | 5817  | 831.39  | -27.5413 | 2 K.KFTFEIEE chrX@1364   | 1.08E-11 | 9.49E-04 |
| 07Apr2011 | 5567  | 1051.48 | 10.55946 | 3 E.GGDWSH Splice@chr    | 3.00E-15 | 0        |
| 07Apr2011 | 5623  | 1051.15 | 14.87916 | 3 E.GGDWSH Splice@chr    | 3.68E-10 | 0.008601 |
| 07Apr2011 | 2759  | 620.85  | 23.40758 | 2 C.QLTALGA chr4@7065    | 3.79E-10 | 0.008954 |
| 07Apr2011 | 8589  | 835.92  | -2.26621 | 2 T.MRCVGK' chrX@1194    | 2.42E-10 | 0.007031 |
| 07Apr2011 | 689   | 420.68  | -22.1784 | 2 R.MMTGTG' chrX@9534    | 4.66E-12 | 2.47E-04 |
| 07Apr2011 | 8535  | 836.42  | -4.27527 | 2 T.MRCVGK' chrX@1194    | 1.81E-10 | 0.005751 |
| 07Apr2011 | 4161  | 1025.61 | -11.6755 | 1 K.LGLGSL chr5@4945     | 6.14E-12 | 2.47E-04 |
| 07Apr2011 | 1515  | 493.61  | 28.00299 | 3 _..FQRHNLl chrX@1408   | 8.62E-11 | 0.002906 |
| 07Apr2011 | 12186 | 634.84  | 6.410455 | 2 R.VDIGDILF Splice@chr  | 6.74E-13 | 0        |
| 07Apr2011 | 11523 | 864.95  | 22.09183 | 2 R.KSSTLMR chr4@1655    | 7.29E-11 | 0.002721 |
| 07Apr2011 | 10244 | 611.35  | -26.7997 | 2 F.LLISVPFSI chr5@9998  | 3.59E-10 | 0.008601 |
| 07Apr2011 | 6929  | 705.83  | -3.72364 | 2 M.PSMEEV chr5@4890     | 4.93E-15 | 0        |
| 07Apr2011 | 7469  | 660.7   | 6.141439 | 3 R.KIANKW/ chr3@2521    | 4.02E-10 | 0.009275 |
| 07Apr2011 | 6923  | 851.48  | -15.2578 | 2 K.RGVRLSH chr2@2785    | 2.20E-10 | 0.006883 |
| 07Apr2011 | 952   | 562.31  | -13.4391 | 2 R.FYLLLYLK Splice@chr  | 5.97E-11 | 0.00255  |
| 07Apr2011 | 5716  | 831.39  | -27.5413 | 2 K.KFTFEIEE chrX@1364   | 2.00E-10 | 0.006305 |
| 07Apr2011 | 8809  | 653.89  | -9.62894 | 2 K.QINLKLQ chr2@1024    | 2.21E-10 | 0.006883 |
| 07Apr2011 | 3441  | 693.87  | -6.6949  | 2 V.ICVAVGD chr5@1065    | 2.06E-10 | 0.006305 |
| 07Apr2011 | 8588  | 858.48  | 6.006088 | 3 _..LETGIKPI Splice@chr | 1.43E-14 | 0        |
| 07Apr2011 | 13742 | 736.05  | -13.3738 | 3 K.NVLNVA' chrX@2592    | 2.13E-10 | 0.006305 |
| 07Apr2011 | 13744 | 432.87  | -13.1521 | 3 R.SETNSDK chr4@8262    | 7.59E-11 | 0.002721 |
| 07Apr2011 | 11282 | 890.44  | 14.86661 | 2 K.GWSVPLI Splice@chr   | 7.39E-11 | 0.002721 |
| 07Apr2011 | 6880  | 705.83  | -3.72364 | 2 M.PSMEEV chr5@4890     | 5.84E-15 | 0        |
| 07Apr2011 | 8892  | 516.3   | 4.106203 | 3 R.NIIFLMVI chrX@1294   | 3.91E-11 | 0.001933 |
| 07Apr2011 | 10810 | 732.07  | 19.51873 | 3 R.ATDDWII Splice@chr   | 1.34E-10 | 0.004643 |
| 07Apr2011 | 9903  | 996.49  | -22.685  | 2 K.SHCRSRF chr5@4504    | 3.75E-10 | 0.008954 |
| 07Apr2011 | 3388  | 693.87  | -6.6949  | 2 V.ICVAVGD chr5@1065    | 6.43E-11 | 0.002721 |
| 07Apr2011 | 9419  | 759.4   | -15.0495 | 2 K.FIDANLQ chr4@8206    | 9.37E-11 | 0.003271 |
| 07Apr2011 | 924   | 562.31  | -13.4391 | 2 R.FYLLLYLK Splice@chr  | 5.45E-11 | 0.002136 |
| 07Apr2011 | 8733  | 833.93  | -9.2006  | 2 _..IIEPYVAV Splice@chr | 1.24E-10 | 0.001906 |
| 07Apr2011 | 6328  | 586.34  | 11.36604 | 2 R.LVILFFLF' chr2@6458  | 3.99E-10 | 0.007304 |
| 07Apr2011 | 5805  | 1051.48 | 10.55946 | 3 E.GGDWSH Splice@chr    | 3.52E-13 | 0        |
| 07Apr2011 | 10848 | 881.97  | 6.136241 | 2 K.CAPRALI chr5@2668    | 4.19E-10 | 0.007465 |
| 07Apr2011 | 7170  | 705.83  | -3.72364 | 2 M.PSMEEV Splice@chr    | 1.97E-13 | 0        |
| 07Apr2011 | 10525 | 611.35  | -26.7997 | 2 F.LLISVPFSI chr5@9998  | 4.34E-10 | 0.007803 |
| 07Apr2011 | 9203  | 516.31  | 23.5317  | 3 R.NIIFLMVI chrX@1294   | 1.29E-10 | 0.001906 |
| 07Apr2011 | 12814 | 491.64  | 23.22207 | 3 R.LLLDKPLF Splice@chr  | 5.98E-11 | 7.98E-04 |
| 07Apr2011 | 12560 | 634.84  | 6.410455 | 2 R.VDIGDILF Splice@chr  | 6.53E-13 | 0        |
| 07Apr2011 | 10296 | 675.33  | -24.7716 | 2 K.IEMEFLVI chrX@1244   | 3.44E-10 | 0.006123 |
| 07Apr2011 | 11638 | 890.45  | 26.12723 | 2 K.GWSVPLI Splice@chr   | 3.02E-10 | 0.005774 |
| 07Apr2011 | 11612 | 1028.99 | -16.6017 | 2 R.SQMDILC chrX@1395    | 4.43E-10 | 0.008124 |
| 07Apr2011 | 11615 | 876.39  | -6.29995 | 3 K.GCSSNLE chr2@8466    | 2.09E-10 | 0.00353  |
| 07Apr2011 | 7279  | 851.48  | -15.2578 | 2 K.RGVRLSH chr2@2785    | 2.12E-10 | 0.00353  |
| 07Apr2011 | 2011  | 507.99  | -29.675  | 4 K.LWYIYVY' chr4@1151   | 3.38E-10 | 0.00595  |

|           |       |         |          |                          |          |          |
|-----------|-------|---------|----------|--------------------------|----------|----------|
| 07Apr2011 | 6029  | 831.4   | -15.4799 | 2 K.KFTFEIEE chrX@1364   | 3.45E-11 | 6.21E-04 |
| 07Apr2011 | 6459  | 916.98  | -3.66487 | 2 _..LK+14.01 chr1@6455  | 3.01E-10 | 0.005622 |
| 07Apr2011 | 1262  | 537.27  | -12.9748 | 2 R.EIFFFWG Splice@chr   | 7.94E-11 | 0.001177 |
| 07Apr2011 | 7694  | 554.26  | 6.682444 | 2 R.M+15.99 Splice@chr   | 2.96E-10 | 0.005622 |
| 07Apr2011 | 11902 | 864.95  | 22.09183 | 2 R.KSSTLMR chr4@1655    | 4.94E-11 | 7.98E-04 |
| 07Apr2011 | 1046  | 562.31  | -13.4391 | 2 R.FYLLYLYK Splice@chr  | 4.74E-11 | 7.98E-04 |
| 07Apr2011 | 1947  | 560.34  | -25.0973 | 2 R.EKVGKFR chr3@1214    | 5.08E-11 | 7.98E-04 |
| 07Apr2011 | 9961  | 1144.59 | 27.90078 | 2 _..YYHFTLDI chr5@8295  | 3.37E-10 | 0.00595  |
| 07Apr2011 | 3435  | 693.87  | -6.6949  | 2 V.ICVAVGD chr5@1065    | 1.47E-10 | 0.002274 |
| 07Apr2011 | 5857  | 1051.15 | 14.87916 | 3 E.GGDWSH Splice@chr    | 8.94E-11 | 0.001177 |
| 07Apr2011 | 10346 | 675.33  | -24.7716 | 2 K.IEMEFLVI chrX@1244   | 2.88E-10 | 0.005622 |
| 07Apr2011 | 8918  | 858.48  | 6.006088 | 3 _..LETGIKPI Splice@chr | 6.05E-11 | 7.98E-04 |
| 07Apr2011 | 7120  | 705.83  | -3.72364 | 2 M.PSMEEV chr5@4890     | 3.33E-15 | 0        |
| 07Apr2011 | 9667  | 759.4   | -15.0495 | 2 K.FIDANLQ chr4@8206    | 1.98E-10 | 0.00353  |
| 07Apr2011 | 822   | 420.68  | -22.1784 | 2 R.MMTGTG chrX@9534     | 2.02E-11 | 4.29E-04 |
| 07Apr2011 | 2766  | 620.85  | 23.40758 | 2 C.QLTALGA chr4@7065    | 1.20E-10 | 0.00173  |
| 07Apr2011 | 8974  | 858.48  | 6.006088 | 3 _..LETGIKPI Splice@chr | 2.21E-10 | 0.00353  |
| 07Apr2011 | 11078 | 732.07  | 19.51873 | 3 R.ATDDWII Splice@chr   | 3.30E-10 | 0.005774 |
| 07Apr2011 | 10720 | 801     | -21.9724 | 2 _..K+14.016 chr4@5074  | 4.80E-10 | 0.008792 |
| 07Apr2011 | 11830 | 1003.19 | 17.13413 | 3 R.CWNRRA Splice@chr    | 8.02E-12 | 0        |
| 07Apr2011 | 12417 | 934.48  | 16.93502 | 2 R.QFRQSGI chr5@4795    | 2.00E-10 | 0.00353  |
| 07Apr2011 | 8897  | 836.42  | -4.27527 | 2 T.MRCVGK chrX@1194     | 4.12E-10 | 0.007465 |
| 07Apr2011 | 4971  | 1116.66 | 20.02355 | 1 K.INLKVNSI chr2@7016   | 1.55E-10 | 0.002274 |
| 07Apr2011 | 3483  | 693.87  | -6.6949  | 2 V.ICVAVGD chr5@1065    | 1.22E-10 | 0.00173  |
| 07Apr2011 | 4305  | 679.32  | -27.147  | 2 K.M+15.99 chr1@1451    | 2.41E-10 | 0.004045 |
| 07Apr2011 | 7174  | 509.3   | -20.473  | 2 R.SSVIMLIV chr2@5767   | 1.66E-10 | 0.003658 |
| 07Apr2011 | 7207  | 1051.15 | 14.87916 | 3 E.GGDWSH Splice@chr    | 1.58E-13 | 0        |
| 07Apr2011 | 15995 | 962.8   | 19.96909 | 3 _..GCSIVPIS Splice@chr | 2.24E-11 | 6.64E-04 |
| 07Apr2011 | 7993  | 917.48  | -5.49614 | 2 _..LK+14.01 chr1@6455  | 2.00E-10 | 0.004623 |
| 07Apr2011 | 9382  | 554.26  | 6.682444 | 2 R.M+15.99 Splice@chr   | 2.21E-10 | 0.004888 |
| 07Apr2011 | 7449  | 831.39  | -27.5413 | 2 K.KFTFEIEE chrX@1364   | 4.70E-11 | 0.001258 |
| 07Apr2011 | 7269  | 831.39  | -27.5413 | 2 K.KFTFEIEE chrX@1364   | 1.44E-10 | 0.003099 |
| 07Apr2011 | 12024 | 996.49  | -22.685  | 2 K.SHCRSRF chr5@4504    | 3.29E-10 | 0.007279 |
| 07Apr2011 | 8107  | 900.92  | -4.03654 | 2 L.K+14.016 Splice@chr  | 4.26E-10 | 0.009093 |
| 07Apr2011 | 15385 | 572.77  | 19.10847 | 2 R.CSSRYRCI Splice@chr  | 2.33E-10 | 0.005019 |
| 07Apr2011 | 12518 | 611.35  | -26.7997 | 2 F.LLISVPFSI chr5@9998  | 2.18E-10 | 0.004888 |
| 07Apr2011 | 1340  | 562.31  | -13.4391 | 2 R.FYLLYLYK Splice@chr  | 4.82E-11 | 0.001258 |
| 07Apr2011 | 15158 | 818.45  | 0.561653 | 2 K.RTIVSVRI chrX@8304   | 2.64E-10 | 0.005679 |
| 07Apr2011 | 1653  | 510.3   | 12.8833  | 2 R.RHVAYVF chr1@1475    | 6.54E-12 | 0        |
| 07Apr2011 | 12245 | 675.33  | -24.7716 | 2 K.IEMEFLVI chrX@1244   | 3.26E-10 | 0.007279 |
| 07Apr2011 | 1306  | 562.31  | -13.4391 | 2 R.FYLLYLYK Splice@chr  | 4.80E-11 | 0.001258 |
| 07Apr2011 | 10628 | 836.42  | -4.27527 | 2 T.MRCVGK chrX@1194     | 3.38E-10 | 0.007279 |
| 07Apr2011 | 10607 | 858.48  | 6.006088 | 3 _..LETGIKPI Splice@chr | 1.96E-12 | 0        |
| 07Apr2011 | 9650  | 1128.04 | -2.03078 | 2 _..IPSAVGYI Splice@chr | 1.04E-12 | 0        |
| 07Apr2011 | 4295  | 693.87  | -6.6949  | 2 V.ICVAVGD chr5@1065    | 2.67E-10 | 0.005818 |
| 07Apr2011 | 12255 | 690.06  | -20.8836 | 3 K.ISKKIFGSI chrX@1720  | 2.46E-10 | 0.00514  |
| 07Apr2011 | 13503 | 931.53  | 0.362106 | 2 R.CTLLYISQ chr4@2818   | 2.77E-10 | 0.005952 |

|           |       |         |          |                         |          |          |
|-----------|-------|---------|----------|-------------------------|----------|----------|
| 07Apr2011 | 16118 | 1147.24 | 4.705638 | 3 R.FQSAAIG Splice@chr  | 1.14E-12 | 0        |
| 07Apr2011 | 10972 | 744.39  | 26.99177 | 2 L.FTENLTT chr5@1256   | 2.25E-10 | 0.005019 |
| 07Apr2011 | 5281  | 1025.61 | -11.6755 | 1 K.LGLGSGL chr5@4945   | 1.20E-11 | 3.35E-04 |
| 07Apr2011 | 16133 | 1147.24 | 4.705638 | 3 R.FQSAAIG Splice@chr  | 1.22E-13 | 0        |
| 07Apr2011 | 3494  | 560.97  | -7.77518 | 3 K.K+14.016 chrX@1071  | 4.47E-10 | 0.009217 |
| 07Apr2011 | 10699 | 762.43  | 16.40509 | 2 _.MK+14.0 chr4@7745   | 1.47E-10 | 0.003233 |
| 07Apr2011 | 7258  | 1051.15 | 14.87916 | 3 E.GGDWSH Splice@chr   | 2.44E-16 | 0        |
| 07Apr2011 | 14297 | 864.95  | 22.09183 | 2 R.KSSTLMR chr4@1655   | 1.01E-10 | 0.002544 |
| 07Apr2011 | 10950 | 516.3   | 4.106203 | 3 R.NIIFLMVI chrX@1294  | 4.40E-10 | 0.009093 |
| 07Apr2011 | 7503  | 831.39  | -27.5413 | 2 K.KFTFEIEE chrX@1364  | 2.32E-11 | 6.64E-04 |
| 07Apr2011 | 9398  | 660.7   | 6.141439 | 3 R.KIANKW/ chr3@2521   | 1.01E-10 | 0.002544 |
| 07Apr2011 | 6832  | 574.8   | 12.19222 | 2 R.WEVTSE( chr5@1925   | 1.44E-10 | 0.003099 |
| 07Apr2011 | 3742  | 514.25  | -29.0158 | 2 R.QICAHSR chr1@8858   | 4.16E-10 | 0.008719 |
| 07Apr2011 | 12075 | 996.49  | -22.685  | 2 K.SHCRSRF chr5@4504   | 8.68E-11 | 0.001829 |
| 07Apr2011 | 2195  | 493.61  | 28.00299 | 3 _.FQRHNLN chrX@1408   | 3.66E-10 | 0.008076 |
| 07Apr2011 | 8849  | 851.48  | -15.2578 | 2 K.RGVRLSH chr2@2785   | 3.66E-10 | 0.008076 |
| 07Apr2011 | 7317  | 1051.14 | 5.269702 | 3 E.GGDWSH Splice@chr   | 1.63E-14 | 0        |
| 07Apr2011 | 9702  | 1128.04 | -2.03078 | 2 _.IPSAVGY( Splice@chr | 1.76E-11 | 3.35E-04 |
| 07Apr2011 | 7117  | 509.3   | -20.473  | 2 R.SSVIMLIV chr2@5767  | 1.08E-10 | 0.002544 |
| 07Apr2011 | 9329  | 554.26  | 6.682444 | 2 R.M+15.99 Splice@chr  | 2.59E-10 | 0.005404 |
| 07Apr2011 | 8880  | 671.37  | -24.0361 | 2 T.FNIVHTQ Splice@chr  | 1.88E-10 | 0.004349 |
| 07Apr2011 | 14145 | 672.59  | -4.41756 | 5 R.KVSNVQ\ chr5@8812   | 2.56E-10 | 0.005268 |
| 07Apr2011 | 14253 | 864.95  | 22.09183 | 2 R.KSSTLMR chr4@1655   | 7.11E-12 | 0        |
| 07Apr2011 | 9115  | 748.72  | -26.0118 | 3 R.LPSKENL\ chr4@5635  | 3.64E-10 | 0.008076 |
| 07Apr2011 | 15065 | 634.84  | 6.410455 | 2 R.VDIGDILF Splice@chr | 2.11E-12 | 0        |
| 07Apr2011 | 8180  | 900.41  | -13.3008 | 2 L.K+14.016 Splice@chr | 3.87E-10 | 0.008197 |
| 07Apr2011 | 4845  | 493.78  | -11.3951 | 2 R.KNQENLI Splice@chr  | 2.22E-10 | 0.004888 |
| 07Apr2011 | 10669 | 858.48  | 6.006088 | 3 _.LETGIKPI Splice@chr | 1.53E-13 | 0        |
| 07Apr2011 | 16295 | 713.68  | -6.48229 | 3 I.YSNTTNSI chr1@2335  | 2.79E-10 | 0.005952 |
| 07Apr2011 | 15027 | 634.84  | 6.410455 | 2 R.VDIGDILF Splice@chr | 1.95E-12 | 0        |
| 07Apr2011 | 4350  | 693.87  | -6.6949  | 2 V.ICVAVGD chr5@1063   | 8.20E-11 | 0.001829 |
| 07Apr2011 | 6895  | 572.63  | 9.609873 | 3 K.IVLFQLFN chr3@1294  | 6.30E-11 | 0.002159 |
| 07Apr2011 | 3424  | 620.85  | 23.40758 | 2 C.QLTALGA chr4@7065   | 2.36E-10 | 0.004627 |
| 07Apr2011 | 9665  | 833.93  | -9.2006  | 2 _.IIEPYVAV Splice@chr | 1.28E-10 | 0.00377  |
| 07Apr2011 | 1623  | 510.3   | 12.8833  | 2 R.RHVAVVF chr1@1475   | 6.54E-12 | 7.82E-04 |
| 07Apr2011 | 2446  | 507.99  | -29.675  | 4 K.LWYIYVY chr4@1151   | 2.69E-10 | 0.006024 |
| 07Apr2011 | 11219 | 996.49  | -22.685  | 2 K.SHCRSRF chr5@4504   | 6.99E-11 | 0.002324 |
| 07Apr2011 | 8635  | 660.7   | 6.141439 | 3 R.KIANKW/ chr3@2521   | 2.43E-10 | 0.004939 |
| 07Apr2011 | 5045  | 1025.61 | -11.6755 | 1 K.LGLGSGL chr5@4945   | 1.20E-11 | 7.82E-04 |
| 07Apr2011 | 6858  | 1051.14 | 5.269702 | 3 E.GGDWSH Splice@chr   | 8.96E-14 | 0        |
| 07Apr2011 | 1286  | 562.31  | -13.4391 | 2 R.FYLLLYLK Splice@chr | 4.74E-11 | 0.002159 |
| 07Apr2011 | 9943  | 608.32  | -7.03498 | 2 K.MPLVGVI Splice@chr  | 3.89E-13 | 0        |
| 07Apr2011 | 1312  | 423.24  | -12.4437 | 2 R.RAPPTFR chr5@4233   | 1.70E-10 | 0.004178 |
| 07Apr2011 | 7026  | 831.39  | -27.5413 | 2 K.KFTFEIEE chrX@1364  | 4.80E-12 | 6.52E-04 |
| 07Apr2011 | 12882 | 890.44  | 14.86661 | 2 K.GWSVPLI Splice@chr  | 2.51E-10 | 0.005092 |
| 07Apr2011 | 5136  | 679.32  | -27.147  | 2 K.M+15.99 chr1@1451   | 3.61E-10 | 0.007527 |
| 07Apr2011 | 5376  | 719.99  | 25.04349 | 2 R.ITK+14.0: chr2@7238 | 1.12E-10 | 0.002937 |

|           |       |         |          |                          |          |          |
|-----------|-------|---------|----------|--------------------------|----------|----------|
| 07Apr2011 | 6912  | 831.39  | -27.5413 | 2 K.KFTFEIEE chrX@1364   | 2.80E-10 | 0.00618  |
| 07Apr2011 | 9837  | 835.92  | -2.26621 | 2 T.MRCVGK chrX@1194     | 1.60E-10 | 0.004178 |
| 07Apr2011 | 7492  | 916.98  | -3.66487 | 2 _..LK+14.01 chr1@6455  | 3.21E-11 | 0.002044 |
| 07Apr2011 | 9848  | 858.48  | 6.006088 | 3 _..LETGIKPI Splice@chr | 8.87E-14 | 0        |
| 07Apr2011 | 13949 | 634.84  | 6.410455 | 2 R.VDIGDILF Splice@chr  | 3.67E-12 | 6.52E-04 |
| 07Apr2011 | 3523  | 620.85  | 23.40758 | 2 C.QLTALGA chr4@7065    | 4.17E-10 | 0.009346 |
| 07Apr2011 | 9269  | 713.38  | -5.25494 | 3 _..DVGAILV Splice@chr  | 3.45E-10 | 0.007218 |
| 07Apr2011 | 9907  | 858.47  | -5.67211 | 3 _..LETGIKPI Splice@chr | 4.18E-13 | 0        |
| 07Apr2011 | 13913 | 634.84  | 6.410455 | 2 R.VDIGDILF Splice@chr  | 4.91E-13 | 0        |
| 07Apr2011 | 11394 | 675.33  | -24.7716 | 2 K.IEMEFLVI chrX@1244   | 2.72E-10 | 0.006024 |
| 07Apr2011 | 6808  | 1051.14 | 5.269702 | 3 E.GGDWSH Splice@chr    | 9.93E-12 | 7.82E-04 |
| 07Apr2011 | 4483  | 493.78  | -11.3951 | 2 R.KNQENLI Splice@chr   | 2.24E-10 | 0.004474 |
| 07Apr2011 | 14425 | 774.46  | 22.64844 | 2 K.WAELVVI chr3@1117    | 1.40E-10 | 0.003926 |
| 07Apr2011 | 1331  | 562.31  | -13.4391 | 2 R.FYLLYLYK Splice@chr  | 4.72E-11 | 0.002159 |
| 07Apr2011 | 9786  | 836.42  | -4.27527 | 2 T.MRCVGK chrX@1194     | 4.09E-10 | 0.008893 |
| 07Apr2011 | 14356 | 1147.24 | 4.705638 | 3 R.FQSAAIG Splice@chr   | 8.54E-16 | 0        |
| 07Apr2011 | 11399 | 872.94  | 13.34407 | 2 R.KSSTLM+ chr4@1655    | 4.46E-10 | 0.006547 |
| 07Apr2011 | 6792  | 829.89  | -16.1259 | 2 R.FEVFEIEC chr4@7295   | 4.99E-10 | 0.007407 |
| 07Apr2011 | 5799  | 437.46  | 16.92139 | 4 R.RGDVPEI chr3@1335    | 5.45E-10 | 0.007982 |
| 07Apr2011 | 6738  | 829.89  | -16.1259 | 2 R.FEVFEIEC chr4@7295   | 4.27E-10 | 0.006396 |
| 07Apr2011 | 12466 | 804.09  | -3.21782 | 3 R.QLTTLEI Splice@chr   | 1.68E-14 | 0        |
| 07Apr2011 | 14284 | 968.17  | -29.3651 | 3 R.FFYNIFAL chrX@4725   | 3.43E-10 | 0.005252 |
| 07Apr2011 | 4427  | 493.78  | -11.3951 | 2 R.KNQENLI Splice@chr   | 2.43E-10 | 0.003447 |
| 07Apr2011 | 12163 | 732.07  | 19.51873 | 3 R.ATDDWII Splice@chr   | 5.88E-11 | 0.001192 |
| 07Apr2011 | 8333  | 851.48  | -15.2578 | 2 K.RGVRLSH chr2@2785    | 5.93E-10 | 0.008702 |
| 07Apr2011 | 11170 | 996.99  | -24.37   | 2 K.SHCRRSF chr5@4504    | 3.85E-10 | 0.005682 |
| 07Apr2011 | 8107  | 705.83  | -3.72364 | 2 M.PSMEEV chr5@4890     | 2.47E-15 | 0        |
| 07Apr2011 | 12126 | 732.07  | 19.51873 | 3 R.ATDDWII Splice@chr   | 2.61E-10 | 0.003447 |
| 07Apr2011 | 11672 | 809.43  | 7.075612 | 3 R.QLTTLEI Splice@chr   | 2.53E-17 | 0        |
| 07Apr2011 | 13746 | 792.15  | -18.5783 | 4 K.SGTIFDNI Splice@chr  | 2.23E-15 | 0        |
| 07Apr2011 | 1115  | 420.68  | -22.1784 | 2 R.MMTGTG chrX@9534     | 2.61E-12 | 0        |
| 07Apr2011 | 8164  | 705.83  | -3.72364 | 2 M.PSMEEV chr5@4890     | 3.78E-15 | 0        |
| 07Apr2011 | 12532 | 785.06  | -22.2115 | 3 _..NLQGEAI chr5@5904   | 2.66E-10 | 0.004063 |
| 07Apr2011 | 8055  | 705.83  | -3.72364 | 2 M.PSMEEV chr5@4890     | 1.54E-15 | 0        |
| 07Apr2011 | 6031  | 628.32  | 10.85905 | 2 R.ISYQAMA Splice@chr   | 3.69E-10 | 0.005537 |
| 07Apr2011 | 4019  | 475.76  | 18.38472 | 2 R.VGIADNF chr5@9964    | 5.03E-10 | 0.007407 |
| 07Apr2011 | 11625 | 835.45  | -7.2977  | 4 R.K+14.016 chrX@9996   | 4.23E-10 | 0.006396 |
| 07Apr2011 | 2110  | 493.61  | 28.00299 | 3 _..FQRHNL chrX@1408    | 2.17E-10 | 0.003008 |
| 07Apr2011 | 11416 | 473.57  | -23.6784 | 3 R.TSFHSSL chr5@5498    | 7.84E-11 | 0.001678 |
| 07Apr2011 | 14673 | 916.98  | -20.1114 | 4 R.YEKVIIFN chr5@1391   | 1.26E-10 | 0.001933 |
| 07Apr2011 | 13492 | 634.84  | 6.410455 | 2 R.VDIGDILF Splice@chr  | 3.29E-13 | 0        |
| 07Apr2011 | 4376  | 493.78  | -11.3951 | 2 R.KNQENLI Splice@chr   | 5.25E-10 | 0.007693 |
| 07Apr2011 | 4166  | 693.87  | -6.6949  | 2 V.ICVAVGD chr5@1065    | 1.98E-10 | 0.002387 |
| 07Apr2011 | 12850 | 864.95  | 22.09183 | 2 R.KSSTLMR chr4@1655    | 5.39E-12 | 1.84E-04 |
| 07Apr2011 | 10006 | 836.42  | -4.27527 | 2 T.MRCVGK chrX@1194     | 2.10E-10 | 0.002695 |
| 07Apr2011 | 12385 | 804.1   | 9.150142 | 3 R.QLTTLEI Splice@chr   | 3.13E-17 | 0        |
| 07Apr2011 | 2062  | 493.61  | 28.00299 | 3 _..FQRHNL chrX@1408    | 1.59E-10 | 0.002347 |

|           |       |         |          |                           |          |          |
|-----------|-------|---------|----------|---------------------------|----------|----------|
| 07Apr2011 | 7418  | 626.81  | 3.564469 | 2 K.SEELMYN chr4@2675     | 5.66E-14 | 0        |
| 07Apr2011 | 8158  | 671.37  | -24.0361 | 2 T.FNIVHTQ Splice@chr    | 4.88E-10 | 0.006884 |
| 07Apr2011 | 11807 | 742.88  | -6.21424 | 2 K.M+15.99 chr4@1648     | 1.14E-10 | 0.001927 |
| 07Apr2011 | 9142  | 578.84  | 18.16832 | 2 R.LSLPQGC Splice@chr    | 5.43E-10 | 0.007417 |
| 07Apr2011 | 8602  | 554.26  | 6.682444 | 2 R.M+15.99 Splice@chr    | 4.21E-10 | 0.005619 |
| 07Apr2011 | 4014  | 435.75  | 9.757472 | 2 R.VLHPYNK chrX@1200     | 3.71E-10 | 0.004919 |
| 07Apr2011 | 6104  | 636.33  | -6.96881 | 2 R.LAATKEN chr1@2522     | 4.03E-10 | 0.005333 |
| 07Apr2011 | 4418  | 493.78  | -11.3951 | 2 R.KNQENLI Splice@chr    | 4.10E-10 | 0.005333 |
| 07Apr2011 | 8029  | 705.83  | -3.72364 | 2 M.PSMEEV chr5@4890      | 2.82E-15 | 0        |
| 07Apr2011 | 4173  | 693.87  | -6.6949  | 2 V.ICVAVGD chr5@1065     | 7.54E-12 | 0        |
| 07Apr2011 | 13771 | 491.64  | 23.22207 | 3 R.LLLDKPLF Splice@chr   | 6.19E-10 | 0.009536 |
| 07Apr2011 | 12852 | 864.95  | 22.09183 | 2 R.KSSTLMR chr4@1655     | 4.10E-11 | 6.79E-04 |
| 07Apr2011 | 8103  | 851.49  | -3.4814  | 2 K.RGVRLSH chr2@2785     | 1.85E-10 | 0.002636 |
| 07Apr2011 | 8582  | 544.81  | 11.89735 | 2 R.LPTYVPA chrX@1248     | 4.71E-10 | 0.006606 |
| 07Apr2011 | 10346 | 622.33  | 9.587405 | 2 R.AK+14.01 chr2@4270    | 2.32E-10 | 0.003202 |
| 07Apr2011 | 9981  | 938.46  | 22.50833 | 2 R.ECSQSDS chr2@8876     | 1.55E-10 | 0.0022   |
| 07Apr2011 | 916   | 549.3   | 2.894294 | 2 K.PTKHGLN Splice@chr    | 5.63E-10 | 0.007828 |
| 07Apr2011 | 9390  | 618.32  | 9.392969 | 2 _..ICSK+14.01 chr2@7590 | 1.17E-10 | 0.002074 |
| 07Apr2011 | 3428  | 620.85  | 23.40758 | 2 C.QLTALGA chr4@7065     | 5.05E-10 | 0.007152 |
| 07Apr2011 | 4353  | 475.76  | 18.38472 | 2 R.VGIADNF chr5@9964     | 5.34E-10 | 0.007282 |
| 07Apr2011 | 3969  | 475.76  | 18.38472 | 2 R.VGIADNF chr5@9964     | 2.83E-10 | 0.003925 |
| 07Apr2011 | 9908  | 608.32  | -7.03498 | 2 K.MPLVGVl Splice@chr    | 4.84E-14 | 0        |
| 07Apr2011 | 8360  | 724.06  | 2.506414 | 3 R.NELEVFK chr1@1385     | 2.85E-10 | 0.003925 |
| 07Apr2011 | 12554 | 890.45  | 26.12723 | 2 K.GWSVPLI Splice@chr    | 7.92E-11 | 0.001635 |
| 07Apr2011 | 11353 | 473.57  | -23.6784 | 3 R.TSFHSSLs chr5@5498    | 1.75E-10 | 0.002495 |
| 07Apr2011 | 12828 | 812.12  | 14.27915 | 3 A.EITEMLPi Splice@chr   | 1.24E-12 | 0        |
| 07Apr2011 | 13487 | 634.84  | 6.410455 | 2 R.VDIGDILF Splice@chr   | 4.66E-13 | 0        |
| 07Apr2011 | 8077  | 705.83  | -3.72364 | 2 M.PSMEEV chr5@4890      | 2.80E-15 | 0        |
| 07Apr2011 | 8362  | 671.37  | -24.0361 | 2 T.FNIVHTQ Splice@chr    | 3.13E-10 | 0.004201 |
| 07Apr2011 | 12866 | 812.12  | 14.27915 | 3 A.EITEMLPi Splice@chr   | 1.67E-12 | 0        |
| 07Apr2011 | 8637  | 669.35  | -20.3327 | 2 _..NCSKK+1 chr3@1116    | 3.36E-10 | 0.004201 |
| 07Apr2011 | 1366  | 562.31  | -13.4391 | 2 R.FYLLLYLK Splice@chr   | 4.73E-11 | 0.001011 |
| 07Apr2011 | 4226  | 693.87  | -6.6949  | 2 V.ICVAVGD chr5@1065     | 1.50E-10 | 0.0022   |
| 07Apr2011 | 9889  | 858.48  | 6.006088 | 3 _..LETGIKPi Splice@chr  | 6.47E-10 | 0.009672 |
| 07Apr2011 | 8412  | 671.37  | -24.0361 | 2 T.FNIVHTQ Splice@chr    | 5.38E-10 | 0.007417 |
| 07Apr2011 | 8208  | 671.37  | -24.0361 | 2 T.FNIVHTQ Splice@chr    | 2.99E-10 | 0.004071 |
| 07Apr2011 | 6713  | 1051.15 | 14.87916 | 3 E.GGDWSH Splice@chr     | 6.17E-11 | 0.001318 |
| 07Apr2011 | 12036 | 732.07  | 19.51873 | 3 R.ATDDWII Splice@chr    | 1.80E-10 | 0.002636 |
| 07Apr2011 | 8057  | 851.49  | -3.4814  | 2 K.RGVRLSH chr2@2785     | 5.13E-11 | 0.001167 |
| 07Apr2011 | 10788 | 565.99  | -4.32119 | 3 R.LIRNSDKI Splice@chr   | 2.84E-11 | 6.79E-04 |
| 07Apr2011 | 12528 | 1028.99 | -16.6017 | 2 R.SQMDILC chrX@1395     | 3.75E-10 | 0.004919 |
| 07Apr2011 | 14565 | 1147.25 | 13.44098 | 3 R.FQSAAIG Splice@chr    | 1.01E-12 | 0        |
| 07Apr2011 | 8135  | 705.83  | -3.72364 | 2 M.PSMEEV chr5@4890      | 2.73E-15 | 0        |
| 07Apr2011 | 11204 | 872.95  | 24.83081 | 2 R.KSSTLM+ chr4@1655     | 3.30E-10 | 0.004573 |
| 07Apr2011 | 8905  | 1128.04 | -2.03078 | 2 _..IPSAVGYi Splice@chr  | 4.59E-12 | 0        |
| 07Apr2011 | 10900 | 918.53  | -15.8984 | 1 K.SSLMVIIR chr4@1212    | 3.58E-10 | 0.00501  |
| 07Apr2011 | 6434  | 750.38  | -22.4793 | 2 _..LTGTLEGI Splice@chr  | 3.18E-15 | 0        |

|           |       |         |          |                          |          |          |
|-----------|-------|---------|----------|--------------------------|----------|----------|
| 07Apr2011 | 6717  | 831.39  | -27.5413 | 2 K.KFTFEIEE chrX@1364   | 3.38E-12 | 0        |
| 07Apr2011 | 11155 | 675.33  | -24.7716 | 2 K.IEMEFLVI chrX@1244   | 3.33E-10 | 0.004573 |
| 07Apr2011 | 13354 | 634.84  | 6.410455 | 2 R.VDIGDILF Splice@chr  | 1.80E-12 | 0        |
| 07Apr2011 | 10561 | 759.4   | -15.0495 | 2 K.FIDANLQ chr4@8206    | 3.94E-10 | 0.005256 |
| 07Apr2011 | 8217  | 724.06  | 2.506414 | 3 R.NELEVFK chr1@1385    | 2.98E-10 | 0.004573 |
| 07Apr2011 | 14269 | 1147.24 | 4.705638 | 3 R.FQSAAIG Splice@chr   | 1.30E-12 | 0        |
| 07Apr2011 | 14254 | 1147.24 | 4.705638 | 3 R.FQSAAIG Splice@chr   | 2.71E-13 | 0        |
| 07Apr2011 | 1139  | 562.31  | -13.4391 | 2 R.FYLLYLYK Splice@chr  | 5.38E-11 | 0.00113  |
| 07Apr2011 | 9780  | 835.92  | -2.26621 | 2 T.MRCVGK chrX@1194     | 2.50E-10 | 0.00359  |
| 07Apr2011 | 5642  | 437.46  | 16.92139 | 4 R.RGDVPEI chr3@1335    | 2.23E-10 | 0.003169 |
| 07Apr2011 | 3269  | 514.25  | -29.0158 | 2 R.QICAHSR chr1@8858    | 3.72E-10 | 0.005128 |
| 07Apr2011 | 9217  | 611     | -3.4687  | 3 _._ISRSFFFQ chr4@4155  | 3.62E-10 | 0.005128 |
| 07Apr2011 | 1407  | 594.8   | -20.0434 | 2 R.KMGIEAC chr2@1114    | 5.29E-10 | 0.006892 |
| 07Apr2011 | 1408  | 506.27  | 9.784813 | 2 K.KDYSGGT chrX@1465    | 1.63E-10 | 0.0023   |
| 07Apr2011 | 6569  | 831.39  | -27.5413 | 2 K.KFTFEIEE chrX@1364   | 1.42E-10 | 0.002162 |
| 07Apr2011 | 12643 | 1003.19 | 17.13413 | 3 R.CWNRRA Splice@chr    | 1.61E-11 | 3.43E-04 |
| 07Apr2011 | 11413 | 835.45  | -7.2977  | 4 R.K+14.016 chrX@9996   | 5.11E-10 | 0.006471 |
| 07Apr2011 | 9277  | 618.32  | 9.392969 | 2 _._ICSK+14.( chr2@7590 | 2.32E-10 | 0.003452 |
| 07Apr2011 | 3380  | 423.26  | 23.30279 | 2 K.LGAETVV chr2@6180    | 3.74E-10 | 0.005128 |
| 07Apr2011 | 7980  | 730.38  | -23.8587 | 3 K.DNVVNTI chr3@7825    | 4.51E-10 | 0.006091 |
| 07Apr2011 | 10972 | 996.49  | -22.685  | 2 K.SHCRSRF chr5@4504    | 5.25E-10 | 0.006892 |
| 07Apr2011 | 5649  | 1116.65 | 11.05125 | 1 K.INLKVNSI chr2@7016   | 2.96E-10 | 0.004306 |
| 07Apr2011 | 8539  | 554.26  | 6.682444 | 2 R.M+15.99 Splice@chr   | 5.24E-10 | 0.006892 |
| 07Apr2011 | 11534 | 835.45  | -7.2977  | 4 R.K+14.016 chrX@9996   | 6.24E-10 | 0.009384 |
| 07Apr2011 | 8857  | 1128.04 | -2.03078 | 2 _._IPSAVGY( Splice@chr | 8.69E-13 | 0        |
| 07Apr2011 | 11266 | 468.91  | -17.4792 | 3 K.TSRNAFK chr1@3696    | 4.37E-10 | 0.005523 |
| 07Apr2011 | 7231  | 554.84  | -0.66123 | 2 L.LVDLALHI chrX@1544   | 3.01E-10 | 0.004573 |
| 07Apr2011 | 14568 | 770.13  | -20.1423 | 4 _._MSLIREK- chr3@1235  | 1.84E-10 | 0.002875 |
| 07Apr2011 | 5932  | 636.33  | -6.96881 | 2 R.LAATKEN chr1@2522    | 5.73E-10 | 0.008009 |
| 07Apr2011 | 10099 | 744.39  | 26.99177 | 2 L.FTENLTTI chr5@1256   | 3.61E-10 | 0.00501  |
| 07Apr2011 | 5032  | 545.33  | -13.7919 | 2 K.LQVFDKL chrX@7538    | 6.95E-11 | 0.001286 |
| 07Apr2011 | 12731 | 864.95  | 22.09183 | 2 R.KSSTLMR chr4@1655    | 1.30E-10 | 0.002162 |
| 07Apr2011 | 6444  | 1051.14 | 5.269702 | 3 E.GGDWSH Splice@chr    | 1.32E-12 | 0        |
| 07Apr2011 | 8025  | 851.48  | -15.2578 | 2 K.RGVRLSH chr2@2785    | 2.46E-10 | 0.003452 |
| 07Apr2011 | 1806  | 418.89  | -10.5715 | 3 R.ENFATKC chr5@5231    | 4.80E-10 | 0.006207 |
| 07Apr2011 | 3758  | 693.87  | -6.6949  | 2 V.ICVAVGD chr5@1065    | 5.89E-10 | 0.008285 |
| 07Apr2011 | 8081  | 851.48  | -15.2578 | 2 K.RGVRLSH chr2@2785    | 4.12E-10 | 0.005256 |
| 07Apr2011 | 12690 | 864.95  | 22.09183 | 2 R.KSSTLMR chr4@1655    | 7.07E-11 | 0.001286 |
| 07Apr2011 | 9798  | 858.47  | -5.67211 | 3 _._LETGIKPI Splice@chr | 2.92E-12 | 0        |
| 07Apr2011 | 8607  | 660.7   | 6.141439 | 3 R.KIANKW/ chr3@2521    | 5.58E-10 | 0.007593 |
| 07Apr2011 | 10592 | 695.36  | -28.1907 | 2 H.QHYSLIK' Splice@chr  | 4.55E-10 | 0.006207 |
| 07Apr2011 | 11991 | 732.07  | 19.51873 | 3 R.ATDDWII Splice@chr   | 9.72E-11 | 0.001736 |
| 07Apr2011 | 3102  | 620.85  | 23.40758 | 2 C.QLTALGA chr4@7065    | 2.87E-11 | 6.71E-04 |
| 07Apr2011 | 3199  | 628.08  | 17.45518 | 4 R.TRRGIPG Splice@chr   | 1.47E-10 | 0.002162 |
| 07Apr2011 | 11684 | 643.68  | -9.56031 | 3 I.VSWWDN Splice@chr    | 6.00E-10 | 0.00885  |
| 07Apr2011 | 5847  | 992.54  | 16.1896  | 1 K.NTMWIV chr5@4366     | 1.16E-10 | 0.002021 |
| 07Apr2011 | 3879  | 693.87  | -6.6949  | 2 V.ICVAVGD chr5@1065    | 5.70E-10 | 0.008009 |

|           |       |         |          |                          |          |          |
|-----------|-------|---------|----------|--------------------------|----------|----------|
| 07Apr2011 | 9835  | 520.26  | -23.8218 | 3 K.LM+15.9 chr1@1132    | 3.92E-10 | 0.005128 |
| 07Apr2011 | 5586  | 437.46  | 16.92139 | 4 R.RGDVPEI chr3@1335    | 4.87E-11 | 8.17E-04 |
| 07Apr2011 | 9604  | 833.93  | -9.2006  | 2 _..IIEPYVAV Splice@chr | 1.76E-10 | 0.002598 |
| 07Apr2011 | 1900  | 493.94  | 19.04183 | 3 _..FQRHNLN chrX@1408   | 1.94E-10 | 0.002875 |
| 07Apr2011 | 11765 | 881.97  | 6.136241 | 2 K.CAPRALI chr5@2668    | 5.43E-10 | 0.007313 |
| 07Apr2011 | 10669 | 644.01  | -16.492  | 3 I.VSWWDN Splice@chr    | 3.64E-10 | 0.006504 |
| 07Apr2011 | 11248 | 868.47  | -17.3524 | 2 L.FLWSK+1 chr2@1462    | 6.09E-10 | 0.009552 |
| 07Apr2011 | 2752  | 620.85  | 23.40758 | 2 C.QLTALGA chr4@7065    | 6.51E-10 | 0.009971 |
| 07Apr2011 | 2755  | 561.31  | 2.144902 | 3 K.K+14.016 chrX@1071   | 6.13E-10 | 0.009552 |
| 07Apr2011 | 7582  | 554.26  | 6.682444 | 2 R.M+15.99 Splice@chr   | 2.29E-10 | 0.004231 |
| 07Apr2011 | 7054  | 851.49  | -3.4814  | 2 K.RGVRLSH chr2@2785    | 1.22E-10 | 0.002879 |
| 07Apr2011 | 9345  | 833.42  | -19.2103 | 2 _..IIEPYVAV Splice@chr | 7.09E-11 | 8.78E-04 |
| 07Apr2011 | 12303 | 634.84  | 6.410455 | 2 R.VDIGDILF Splice@chr  | 8.25E-13 | 0        |
| 07Apr2011 | 8773  | 835.92  | -2.26621 | 2 T.MRCVGK chrX@1194     | 3.21E-10 | 0.005282 |
| 07Apr2011 | 5729  | 1051.48 | 10.55946 | 3 E.GGDWSH Splice@chr    | 1.48E-15 | 0        |
| 07Apr2011 | 2993  | 571.36  | 10.76628 | 2 R.KRKQGA chr1@1385     | 3.16E-10 | 0.005282 |
| 07Apr2011 | 11080 | 931.53  | 0.362106 | 2 R.CTLIYISQ chr4@2818   | 5.96E-10 | 0.009552 |
| 07Apr2011 | 8642  | 833.93  | -9.2006  | 2 _..IIEPYVAV Splice@chr | 5.64E-10 | 0.009446 |
| 07Apr2011 | 1021  | 562.31  | -13.4391 | 2 R.FYLLYLYK Splice@chr  | 4.76E-11 | 7.09E-04 |
| 07Apr2011 | 7163  | 851.49  | -3.4814  | 2 K.RGVRLSH chr2@2785    | 1.43E-10 | 0.00319  |
| 07Apr2011 | 10625 | 644.01  | -16.492  | 3 I.VSWWDN Splice@chr    | 2.75E-10 | 0.004844 |
| 07Apr2011 | 7662  | 660.7   | 6.141439 | 3 R.KIANKW/ chr3@2521    | 3.43E-10 | 0.005884 |
| 07Apr2011 | 7735  | 742.38  | -26.3192 | 2 R.ETFISVEK chr5@7445   | 5.06E-10 | 0.008407 |
| 07Apr2011 | 8825  | 835.92  | -2.26621 | 2 T.MRCVGK chrX@1194     | 9.38E-11 | 0.001898 |
| 07Apr2011 | 8273  | 580.66  | 3.439687 | 3 _..LDLFEYSI chr3@2551  | 5.09E-10 | 0.008407 |
| 07Apr2011 | 10140 | 675.33  | -24.7716 | 2 K.IEMEFLVI chrX@1244   | 1.64E-10 | 0.003485 |
| 07Apr2011 | 756   | 420.68  | -22.1784 | 2 R.MMTGTG chrX@9534     | 3.81E-12 | 2.11E-04 |
| 07Apr2011 | 8879  | 858.47  | -5.67211 | 3 _..LETGIKPI Splice@chr | 7.31E-13 | 0        |
| 07Apr2011 | 9963  | 996.49  | -22.685  | 2 K.SHCRSRF chr5@4504    | 6.30E-10 | 0.009679 |
| 07Apr2011 | 10948 | 732.07  | 19.51873 | 3 R.ATDDWII Splice@chr   | 3.63E-10 | 0.006504 |
| 07Apr2011 | 3400  | 693.87  | -6.6949  | 2 V.ICVAVGD chr5@1063    | 1.33E-10 | 0.00319  |
| 07Apr2011 | 5821  | 572.63  | 9.609873 | 3 K.IVLFQLFN chr3@1294   | 2.90E-10 | 0.004984 |
| 07Apr2011 | 10720 | 742.88  | -6.21424 | 2 K.M+15.99 chr4@1648    | 1.98E-10 | 0.003629 |
| 07Apr2011 | 11230 | 750.38  | -16.0136 | 2 V.SWQILFN Splice@chr   | 3.98E-10 | 0.006778 |
| 07Apr2011 | 9614  | 759.4   | -15.0495 | 2 K.FIDANLQ chr4@8206    | 4.94E-10 | 0.008407 |
| 07Apr2011 | 3096  | 423.26  | 23.30279 | 2 K.LGAETVV chr2@6180    | 2.98E-10 | 0.004984 |
| 07Apr2011 | 9100  | 653.89  | -9.62894 | 2 K.QINLKLQ chr2@1024    | 5.91E-10 | 0.009552 |
| 07Apr2011 | 12551 | 736.05  | -13.3738 | 3 K.NVLNVAI chrX@2592    | 3.12E-10 | 0.005282 |
| 07Apr2011 | 13518 | 769.88  | -19.0515 | 4 _..MSLIREK chr3@1233   | 2.81E-11 | 5.58E-04 |
| 07Apr2011 | 11681 | 864.95  | 22.09183 | 2 R.KSSTLMR chr4@1655    | 8.35E-11 | 0.00122  |
| 07Apr2011 | 7154  | 671.37  | -24.0361 | 2 T.FNIVHTQ Splice@chr   | 5.38E-10 | 0.009153 |
| 07Apr2011 | 11718 | 864.95  | 22.09183 | 2 R.KSSTLMR chr4@1655    | 1.05E-10 | 0.002387 |
| 07Apr2011 | 8295  | 713.38  | -5.25494 | 3 _..DVGAILV Splice@chr  | 4.26E-10 | 0.006923 |
| 07Apr2011 | 735   | 420.68  | -22.1784 | 2 R.MMTGTG chrX@9534     | 4.66E-12 | 3.73E-04 |
| 07Apr2011 | 8829  | 858.48  | 6.006088 | 3 _..LETGIKPI Splice@chr | 1.89E-10 | 0.003629 |
| 07Apr2011 | 12743 | 1147.24 | 4.705638 | 3 R.FQSAAIG Splice@chr   | 3.07E-13 | 0        |
| 07Apr2011 | 7840  | 660.7   | 6.141439 | 3 R.KIANKW/ chr3@2521    | 5.55E-10 | 0.007442 |

|           |       |         |          |                         |          |          |
|-----------|-------|---------|----------|-------------------------|----------|----------|
| 07Apr2011 | 7234  | 851.48  | -15.2578 | 2 K.RGVRLSH chr2@2785   | 5.47E-10 | 0.007287 |
| 07Apr2011 | 7509  | 1111.1  | -11.1063 | 2 R.LLM+15.5 chr4@3284  | 2.11E-10 | 0.003071 |
| 07Apr2011 | 10597 | 742.88  | -6.21424 | 2 K.M+15.99 chr4@1648   | 1.71E-10 | 0.002579 |
| 07Apr2011 | 3023  | 423.26  | 23.30279 | 2 K.LGAETVV chr2@6180   | 3.78E-10 | 0.005615 |
| 07Apr2011 | 8488  | 517     | -25.0578 | 4 R.VFEVSLG Splice@chr  | 5.11E-10 | 0.006981 |
| 07Apr2011 | 8833  | 858.48  | 6.006088 | 3 _LETGIKPI Splice@chr  | 1.32E-14 | 0        |
| 07Apr2011 | 3373  | 693.87  | -6.6949  | 2 V.ICVAVGD chr5@1065   | 3.14E-10 | 0.00514  |
| 07Apr2011 | 10989 | 750.38  | -16.0136 | 2 V.SWQILFN Splice@chr  | 1.81E-10 | 0.002746 |
| 07Apr2011 | 2905  | 432.75  | 10.60282 | 2 R.VYQVLDK chr1@9136   | 5.19E-10 | 0.006981 |
| 07Apr2011 | 12469 | 606.63  | -14.6199 | 3 K.KCNEEGC chr3@1174   | 4.56E-10 | 0.006525 |
| 07Apr2011 | 8647  | 833.93  | -9.2006  | 2 _IIEPYVAV Splice@chr  | 1.44E-10 | 0.002429 |
| 07Apr2011 | 10199 | 835.45  | -7.2977  | 4 R.K+14.016 chrX@9996  | 5.60E-10 | 0.007599 |
| 07Apr2011 | 7691  | 554.26  | 6.682444 | 2 R.M+15.99 Splice@chr  | 5.42E-10 | 0.007287 |
| 07Apr2011 | 7033  | 705.83  | -3.72364 | 2 M.PSMEEV chr5@4890    | 7.98E-15 | 0        |
| 07Apr2011 | 11526 | 1007.86 | 15.19559 | 3 R.CWNRRRA Splice@chr  | 3.94E-12 | 2.10E-04 |
| 07Apr2011 | 5985  | 572.63  | 9.609873 | 3 K.IVLFQLFN chr3@1294  | 3.85E-10 | 0.005615 |
| 07Apr2011 | 1367  | 510.3   | 12.8833  | 2 R.RHVAYVF chr1@1479   | 3.26E-11 | 7.56E-04 |
| 07Apr2011 | 11913 | 634.84  | 6.410455 | 2 R.VDIGDILF Splice@chr | 2.05E-13 | 0        |
| 07Apr2011 | 12684 | 968.17  | -29.3651 | 3 R.FFYNIFAL chrX@4722  | 1.11E-10 | 0.001744 |
| 07Apr2011 | 1102  | 562.31  | -13.4391 | 2 R.FYLLLYLK Splice@chr | 4.72E-11 | 0.001277 |
| 07Apr2011 | 4966  | 1116.65 | 11.05125 | 1 K.INLKVNSI chr2@7016  | 2.72E-10 | 0.004359 |
| 07Apr2011 | 12753 | 1147.24 | 4.705638 | 3 R.FQSAAIG Splice@chr  | 1.19E-15 | 0        |
| 07Apr2011 | 2780  | 519.6   | -26.5197 | 3 K.IGSM+15 chr5@1654   | 9.54E-11 | 0.001604 |
| 07Apr2011 | 3065  | 423.26  | 23.30279 | 2 K.LGAETVV chr2@6180   | 2.68E-10 | 0.004207 |
| 07Apr2011 | 3047  | 431.23  | 26.44045 | 4 K.YVITNGIM chr4@8395  | 6.32E-10 | 0.00852  |
| 07Apr2011 | 9157  | 754.46  | -2.06563 | 2 K.K+14.016 chr2@1375  | 1.50E-10 | 0.002429 |
| 07Apr2011 | 9895  | 996.49  | -22.685  | 2 K.SHCRSRF chr5@4504   | 3.54E-10 | 0.00514  |
| 07Apr2011 | 11415 | 864.95  | 22.09183 | 2 R.KSSTLMR chr4@1655   | 3.33E-12 | 2.10E-04 |
| 07Apr2011 | 5796  | 512.27  | 9.502328 | 2 R.ICTTATID chr5@1130  | 5.80E-11 | 0.001277 |
| 07Apr2011 | 10841 | 931.53  | 0.362106 | 2 R.CTLLYISQ chr4@2818  | 7.01E-10 | 0.009907 |
| 07Apr2011 | 11942 | 634.83  | -9.39461 | 2 R.VDIGDILF Splice@chr | 1.07E-13 | 0        |
| 07Apr2011 | 11379 | 864.95  | 22.09183 | 2 R.KSSTLMR chr4@1655   | 1.19E-10 | 0.001744 |
| 07Apr2011 | 12155 | 491.64  | 23.22207 | 3 R.LLLDKPLF Splice@chr | 2.31E-11 | 5.74E-04 |
| 07Apr2011 | 10960 | 868.47  | -17.3524 | 2 L.FLWSK+1 chr2@1462   | 7.26E-11 | 0.001435 |
| 07Apr2011 | 11340 | 1003.18 | 7.145987 | 3 R.CWNRRRA Splice@chr  | 2.57E-11 | 5.74E-04 |
| 07Apr2011 | 4287  | 1025.61 | -11.6755 | 1 K.LGLGSGL chr5@4945   | 1.02E-11 | 3.93E-04 |
| 07Apr2011 | 3214  | 583.79  | -23.2497 | 2 R.YLAAAAC chr5@9265   | 6.45E-10 | 0.008673 |
| 07Apr2011 | 7504  | 724.06  | 2.506414 | 3 R.NELEVFK chr1@1385   | 1.09E-10 | 0.001744 |
| 07Apr2011 | 5930  | 572.97  | 19.25659 | 3 K.IVLFQLFN chr3@1294  | 6.87E-10 | 0.009434 |
| 07Apr2011 | 8892  | 858.47  | -5.67211 | 3 _LETGIKPI Splice@chr  | 1.78E-11 | 3.93E-04 |
| 07Apr2011 | 6874  | 730.38  | -23.8587 | 3 K.DNVVNTI chr3@7825   | 3.51E-10 | 0.008231 |
| 07Apr2011 | 5687  | 1051.48 | 10.55946 | 3 E.GGDWSH Splice@chr   | 3.60E-16 | 0        |
| 07Apr2011 | 8637  | 858.48  | 6.006088 | 3 _LETGIKPI Splice@chr  | 7.06E-14 | 0        |
| 07Apr2011 | 2706  | 620.85  | 23.40758 | 2 C.QLTALGA chr4@7065   | 2.20E-10 | 0.004677 |
| 07Apr2011 | 980   | 562.31  | -13.4391 | 2 R.FYLLLYLK Splice@chr | 4.82E-11 | 9.90E-04 |
| 07Apr2011 | 9933  | 675.33  | -24.7716 | 2 K.IEMEFLVI chrX@1244  | 4.56E-10 | 0.00947  |
| 07Apr2011 | 8369  | 833.93  | -9.2006  | 2 _IIEPYVAV Splice@chr  | 4.98E-10 | 0.009617 |

|           |       |         |          |                          |          |          |
|-----------|-------|---------|----------|--------------------------|----------|----------|
| 07Apr2011 | 8534  | 835.92  | -2.26621 | 2 T.MRCVGK chrX@1194     | 1.69E-10 | 0.003301 |
| 07Apr2011 | 10051 | 738.9   | 4.880241 | 2 R.DQNFWK chr1@7265     | 4.57E-10 | 0.00947  |
| 07Apr2011 | 10054 | 745.47  | -1.18815 | 2 K.QVILNLF chr1@4832    | 1.66E-10 | 0.003301 |
| 07Apr2011 | 11530 | 864.95  | 22.09183 | 2 R.KSSTLMR chr4@1655    | 2.12E-11 | 4.20E-04 |
| 07Apr2011 | 4407  | 522.31  | -23.2988 | 2 C.PTLLPPL chr2@1388    | 1.88E-10 | 0.003998 |
| 07Apr2011 | 11217 | 876.39  | -6.29995 | 3 K.GCSSNLE chr2@8466    | 3.19E-10 | 0.007041 |
| 07Apr2011 | 12099 | 634.84  | 6.410455 | 2 R.VDIGDILF Splice@chr  | 4.67E-13 | 0        |
| 07Apr2011 | 10540 | 742.88  | -6.21424 | 2 K.M+15.99 chr4@1648    | 1.68E-10 | 0.003301 |
| 07Apr2011 | 7426  | 554.26  | 6.682444 | 2 R.M+15.99 Splice@chr   | 3.17E-10 | 0.007041 |
| 07Apr2011 | 7422  | 660.7   | 6.141439 | 3 R.KIANKW chr3@2521     | 4.09E-10 | 0.009029 |
| 07Apr2011 | 5542  | 771.39  | 2.218364 | 2 R.NFFKTPA chr3@1244    | 4.68E-10 | 0.00947  |
| 07Apr2011 | 7467  | 660.7   | 6.141439 | 3 R.KIANKW chr3@2521     | 2.61E-10 | 0.005336 |
| 07Apr2011 | 2754  | 620.85  | 23.40758 | 2 C.QLTALGA chr4@7065    | 4.75E-10 | 0.009617 |
| 07Apr2011 | 8088  | 618.32  | 9.392969 | 2 _..ICSK+14.1 chr2@7590 | 6.21E-11 | 0.001566 |
| 07Apr2011 | 8066  | 580.66  | 8.535221 | 3 M.MIRSEM Splice@chr    | 4.10E-10 | 0.009189 |
| 07Apr2011 | 8895  | 744.39  | 26.99177 | 2 L.FTENLTT chr5@1256    | 2.19E-10 | 0.004677 |
| 07Apr2011 | 6856  | 558.3   | -13.2154 | 3 R.KFWNVP chrX@1472     | 1.24E-10 | 0.002964 |
| 07Apr2011 | 989   | 464.24  | -7.11495 | 2 K.ETSFSTK chr4@8236    | 1.52E-10 | 0.003134 |
| 07Apr2011 | 3285  | 435.75  | 9.757472 | 2 R.VLHPYNK chrX@1200    | 4.03E-10 | 0.00886  |
| 07Apr2011 | 13001 | 1147.24 | 4.705638 | 3 R.FQSAAIG Splice@chr   | 9.46E-15 | 0        |
| 07Apr2011 | 8589  | 858.47  | -5.67211 | 3 _..LETGIKPI Splice@chr | 1.51E-12 | 0        |
| 07Apr2011 | 1757  | 493.61  | 28.00299 | 3 _..FQRHNL chrX@1408    | 2.22E-11 | 6.03E-04 |
| 07Apr2011 | 8302  | 962.48  | 13.7521  | 2 R.AYFHVTA chr1@1005    | 2.83E-10 | 0.005665 |
| 07Apr2011 | 10412 | 643.68  | -9.56031 | 3 I.VSWWDN Splice@chr    | 1.63E-10 | 0.003301 |
| 07Apr2011 | 12536 | 774.46  | 22.64844 | 2 K.WAELVVI chr3@1117    | 1.30E-10 | 0.002964 |
| 07Apr2011 | 5860  | 831.39  | -27.5413 | 2 K.KFTFEIEE chrX@1364   | 3.92E-11 | 6.03E-04 |
| 07Apr2011 | 3730  | 493.78  | -11.3951 | 2 R.KNQENLI Splice@chr   | 2.48E-10 | 0.005336 |
| 07Apr2011 | 4049  | 493.78  | -11.3951 | 2 R.KNQENLI Splice@chr   | 4.11E-10 | 0.006608 |
| 07Apr2011 | 5208  | 476.73  | -8.21113 | 2 R.SSHEISHF chr5@1494   | 3.40E-10 | 0.006149 |
| 07Apr2011 | 6081  | 1017.59 | -22.5744 | 1 R.SSVIMLIV chr2@5767   | 5.07E-10 | 0.008065 |
| 07Apr2011 | 10191 | 996.49  | -22.685  | 2 K.SHCRSRF chr5@4504    | 1.96E-10 | 0.003411 |
| 07Apr2011 | 11016 | 732.07  | 19.51873 | 3 R.ATDDWII Splice@chr   | 3.39E-11 | 7.77E-04 |
| 07Apr2011 | 3663  | 435.75  | 9.757472 | 2 R.VLHPYNK chrX@1200    | 4.31E-10 | 0.006948 |
| 07Apr2011 | 6230  | 572.63  | 9.609873 | 3 K.IVLFQLFN chr3@1294   | 5.23E-10 | 0.008065 |
| 07Apr2011 | 3651  | 475.76  | 18.38472 | 2 R.VGIADNF chr5@9964    | 5.95E-10 | 0.009387 |
| 07Apr2011 | 4565  | 639.28  | -4.30427 | 3 R.AYSFMSS chrX@4976    | 3.51E-14 | 0        |
| 07Apr2011 | 6034  | 509.8   | -23.773  | 2 R.SSVIMLIV chr2@5767   | 1.87E-10 | 0.003264 |
| 07Apr2011 | 7478  | 851.48  | -15.2578 | 2 K.RGVRLSH chr2@2785    | 3.10E-10 | 0.00582  |
| 07Apr2011 | 7751  | 748.73  | -12.625  | 3 R.LPSKENL chr4@5635    | 5.87E-11 | 9.60E-04 |
| 07Apr2011 | 10396 | 473.57  | -23.6784 | 3 R.TSFHSSL chr5@5498    | 2.93E-10 | 0.005492 |
| 07Apr2011 | 985   | 420.68  | -22.1784 | 2 R.MMTGT chrX@9534      | 8.90E-12 | 2.11E-04 |
| 07Apr2011 | 9243  | 858.47  | -5.67211 | 3 _..LETGIKPI Splice@chr | 3.46E-12 | 0        |
| 07Apr2011 | 5541  | 628.32  | 10.85905 | 2 R.ISYQAMA Splice@chr   | 5.36E-10 | 0.008569 |
| 07Apr2011 | 9012  | 833.93  | -9.2006  | 2 _..IIEPYVAV Splice@chr | 2.06E-10 | 0.003411 |
| 07Apr2011 | 11043 | 732.07  | 19.51873 | 3 R.ATDDWII Splice@chr   | 5.36E-10 | 0.008569 |
| 07Apr2011 | 7531  | 851.49  | -3.4814  | 2 K.RGVRLSH chr2@2785    | 2.90E-10 | 0.005492 |
| 07Apr2011 | 11687 | 864.95  | 22.09183 | 2 R.KSSTLMR chr4@1655    | 1.62E-11 | 4.06E-04 |

|           |       |         |          |                          |          |          |
|-----------|-------|---------|----------|--------------------------|----------|----------|
| 07Apr2011 | 9197  | 858.47  | -5.67211 | 3 _..LETGIKPI Splice@chr | 9.71E-13 | 0        |
| 07Apr2011 | 5324  | 1116.65 | 11.05125 | 1 K.INLKVNSI chr2@7016   | 4.26E-10 | 0.006778 |
| 07Apr2011 | 6086  | 509.8   | -23.773  | 2 R.SSVIMLIV chr2@5767   | 7.58E-11 | 0.001297 |
| 07Apr2011 | 8039  | 660.7   | 6.141439 | 3 R.KIANKW/ chr3@2521    | 6.81E-11 | 9.60E-04 |
| 07Apr2011 | 11380 | 876.39  | -6.29995 | 3 K.GCSSNLE chr2@8466    | 3.49E-10 | 0.006447 |
| 07Apr2011 | 11656 | 864.95  | 22.09183 | 2 R.KSSTLMR chr4@1655    | 5.97E-11 | 9.60E-04 |
| 07Apr2011 | 3700  | 475.76  | 18.38472 | 2 R.VGIADNF chr5@9964    | 4.99E-10 | 0.007731 |
| 07Apr2011 | 12870 | 860.68  | 2.433027 | 4 R.FQSAAIG Splice@chr   | 3.30E-12 | 0        |
| 07Apr2011 | 12169 | 634.83  | -9.39461 | 2 R.VDIGDILF Splice@chr  | 8.15E-12 | 2.11E-04 |
| 07Apr2011 | 13180 | 968.17  | -29.3651 | 3 R.FFYNIFAL chrX@4722   | 3.76E-10 | 0.006938 |
| 07Apr2011 | 3697  | 493.78  | -11.3951 | 2 R.KNQENLI Splice@chr   | 3.49E-10 | 0.006777 |
| 07Apr2011 | 13247 | 860.69  | 14.08015 | 4 R.FQSAAIG Splice@chr   | 1.28E-11 | 2.00E-04 |
| 07Apr2011 | 8980  | 762.43  | 16.40509 | 2 _..MK+14.0 chr4@7745   | 3.41E-10 | 0.006777 |
| 07Apr2011 | 9818  | 579.65  | -3.79726 | 3 _..LLDFLPVt chrX@7991  | 5.14E-10 | 0.009417 |
| 07Apr2011 | 6438  | 916.99  | 7.263111 | 2 _..LK+14.01 chr1@6455  | 1.33E-10 | 0.002098 |
| 07Apr2011 | 4222  | 639.28  | -4.30427 | 3 R.AYSFMSS chrX@4976    | 3.79E-13 | 0        |
| 07Apr2011 | 2741  | 560.97  | -7.77518 | 3 K.K+14.016 chrX@1071   | 7.18E-11 | 0.001082 |
| 07Apr2011 | 8468  | 618.32  | 9.392969 | 2 _..ICSK+14.1 chr2@7590 | 2.60E-10 | 0.005054 |
| 07Apr2011 | 9441  | 833.43  | -7.18554 | 2 _..IIEPYVAV Splice@chr | 3.49E-10 | 0.006777 |
| 07Apr2011 | 8969  | 858.48  | 6.006088 | 3 _..LETGIKPI Splice@chr | 7.90E-12 | 2.00E-04 |
| 07Apr2011 | 4253  | 1025.61 | -11.6755 | 1 K.LGLGSGL chr5@4945    | 8.30E-12 | 2.00E-04 |
| 07Apr2011 | 7114  | 851.49  | -3.4814  | 2 K.RGVRLSH chr2@2785    | 3.29E-10 | 0.006777 |
| 07Apr2011 | 5937  | 831.4   | -15.4799 | 2 K.KFTFEIEE chrX@1364   | 1.98E-11 | 7.52E-04 |
| 07Apr2011 | 2138  | 576.79  | 21.06243 | 2 K.QNGESA\ chrX@4435    | 3.47E-10 | 0.006777 |
| 07Apr2011 | 10774 | 742.88  | -6.21424 | 2 K.M+15.99 chr4@1648    | 3.65E-10 | 0.006777 |
| 07Apr2011 | 9022  | 858.48  | 6.006088 | 3 _..LETGIKPI Splice@chr | 1.06E-12 | 0        |
| 07Apr2011 | 10998 | 732.07  | 19.51873 | 3 R.ATDDWII Splice@chr   | 7.14E-11 | 0.001082 |
| 07Apr2011 | 13253 | 1147.25 | 13.44098 | 3 R.FQSAAIG Splice@chr   | 1.63E-14 | 0        |
| 07Apr2011 | 3336  | 693.87  | -6.6949  | 2 V.ICVAVGD chr5@1065    | 5.30E-11 | 9.12E-04 |
| 07Apr2011 | 806   | 420.68  | -22.1784 | 2 R.MMTGTt chrX@9534     | 6.18E-12 | 2.00E-04 |
| 07Apr2011 | 6721  | 657.04  | -26.9179 | 3 R.GNVRK+1 chrX@7490    | 3.66E-10 | 0.006777 |
| 07Apr2011 | 828   | 420.68  | -22.1784 | 2 R.MMTGTt chrX@9534     | 4.44E-12 | 2.00E-04 |
| 07Apr2011 | 12353 | 634.84  | 6.410455 | 2 R.VDIGDILF Splice@chr  | 2.17E-13 | 0        |
| 07Apr2011 | 3126  | 423.26  | 23.30279 | 2 K.LGAETVV chr2@6180    | 9.99E-11 | 0.001588 |
| 07Apr2011 | 7707  | 669.35  | -20.3327 | 2 _..NCSKK+1 chr3@1116   | 2.39E-10 | 0.004905 |
| 07Apr2011 | 9663  | 759.4   | -15.0495 | 2 K.FIDANLQ chr4@8206    | 4.01E-10 | 0.007394 |
| 07Apr2011 | 7269  | 671.87  | -26.5383 | 2 T.FNIVHTQ Splice@chr   | 4.42E-10 | 0.008339 |
| 07Apr2011 | 1073  | 562.31  | -13.4391 | 2 R.FYLLYLYK Splice@chr  | 6.64E-11 | 0.001082 |
| 07Apr2011 | 11441 | 876.39  | -6.29995 | 3 K.GCSSNLE chr2@8466    | 4.63E-10 | 0.008652 |
| 07Apr2011 | 8900  | 836.42  | -4.27527 | 2 T.MRCVGK\ chrX@1194    | 1.40E-10 | 0.002251 |
| 07Apr2011 | 8775  | 833.94  | 2.824179 | 2 _..IIEPYVAV Splice@chr | 2.76E-10 | 0.006026 |
| 07Apr2011 | 7026  | 671.37  | -24.0361 | 2 T.FNIVHTQ Splice@chr   | 3.82E-10 | 0.006041 |
| 07Apr2011 | 11422 | 864.95  | 22.09183 | 2 R.KSSTLMR chr4@1655    | 1.95E-10 | 0.001736 |
| 07Apr2011 | 4916  | 628.32  | 10.85905 | 2 R.ISYQAMA\ Splice@chr  | 3.05E-10 | 0.004083 |
| 07Apr2011 | 7527  | 990.04  | 1.604515 | 2 R.KIANKW/ chr3@2521    | 3.53E-10 | 0.005054 |
| 07Apr2011 | 906   | 562.31  | -13.4391 | 2 R.FYLLYLYK Splice@chr  | 5.00E-11 | 5.62E-04 |
| 07Apr2011 | 9380  | 695.36  | -28.1907 | 2 H.QHYSLIK\ Splice@chr  | 5.36E-10 | 0.008034 |

|           |       |         |          |                         |          |          |
|-----------|-------|---------|----------|-------------------------|----------|----------|
| 07Apr2011 | 9105  | 622.33  | 9.587405 | 2 R.AK+14.01 chr2@4270  | 4.96E-10 | 0.007573 |
| 07Apr2011 | 1569  | 493.61  | 28.00299 | 3 _FQRHNL chrX@1408     | 3.00E-10 | 0.004083 |
| 07Apr2011 | 12046 | 634.84  | 6.410455 | 2 R.VDIGDILF Splice@chr | 1.18E-12 | 0        |
| 07Apr2011 | 6866  | 705.83  | -3.72364 | 2 M.PSMEEV Splice@chr   | 2.86E-11 | 3.83E-04 |
| 07Apr2011 | 3935  | 1025.61 | -11.6755 | 1 K.LGLGSL chr5@4945    | 9.54E-12 | 1.94E-04 |
| 07Apr2011 | 6889  | 851.48  | -15.2578 | 2 K.RGVRLSH chr2@2785   | 2.13E-10 | 0.001902 |
| 07Apr2011 | 12020 | 634.83  | -9.39461 | 2 R.VDIGDILF Splice@chr | 6.05E-13 | 0        |
| 07Apr2011 | 8647  | 858.48  | 6.006088 | 3 _LETGIKPI Splice@chr  | 1.21E-13 | 0        |
| 07Apr2011 | 6756  | 705.83  | -3.72364 | 2 M.PSMEEV chr5@4890    | 2.71E-15 | 0        |
| 07Apr2011 | 7392  | 554.26  | 6.682444 | 2 R.M+15.99 Splice@chr  | 1.62E-10 | 0.001736 |
| 07Apr2011 | 9006  | 516.3   | 4.106203 | 3 R.NIIFLMVI chrX@1294  | 5.95E-10 | 0.00914  |
| 07Apr2011 | 11389 | 1003.18 | 7.145987 | 3 R.CWNRRA Splice@chr   | 6.36E-12 | 0        |
| 07Apr2011 | 8189  | 618.32  | 9.392969 | 2 _ICSK+14.1 chr2@7590  | 2.15E-10 | 0.001902 |
| 07Apr2011 | 10566 | 742.88  | -6.21424 | 2 K.M+15.99 chr4@1648   | 3.57E-10 | 0.005216 |
| 07Apr2011 | 6938  | 851.48  | -15.2578 | 2 K.RGVRLSH chr2@2785   | 4.05E-10 | 0.006509 |
| 07Apr2011 | 2483  | 560.97  | -7.77518 | 3 K.K+14.016 chrX@1071  | 8.65E-11 | 0.001272 |
| 07Apr2011 | 6811  | 705.83  | -3.72364 | 2 M.PSMEEV chr5@4890    | 9.56E-15 | 0        |
| 07Apr2011 | 12831 | 1136.55 | -15.3512 | 2 _YRITISTFI chr1@5408  | 1.82E-10 | 0.001736 |
| 07Apr2011 | 8449  | 833.93  | -9.2006  | 2 _IIEPYVAV Splice@chr  | 3.16E-10 | 0.004408 |
| 07Apr2011 | 13172 | 916.98  | -20.1114 | 4 R.YEKVIIFN chr5@1391  | 1.50E-10 | 0.001736 |
| 07Apr2011 | 11458 | 864.95  | 22.09183 | 2 R.KSSTLMR chr4@1655   | 8.36E-11 | 0.001272 |
| 07Apr2011 | 9689  | 996.49  | -22.685  | 2 K.SHCRSRF chr5@4504   | 2.22E-10 | 0.002243 |
| 07Apr2011 | 12293 | 491.64  | 23.22207 | 3 R.LLLDKPLF Splice@chr | 1.37E-10 | 0.001736 |
| 07Apr2011 | 8952  | 753.95  | -13.1319 | 2 K.K+14.016 chr2@1375  | 1.72E-10 | 0.001736 |
| 07Apr2011 | 11094 | 876.39  | -6.29995 | 3 K.GCSSNLE chr2@8466   | 5.00E-10 | 0.007573 |
| 07Apr2011 | 12271 | 491.64  | 23.22207 | 3 R.LLLDKPLF Splice@chr | 4.40E-12 | 0        |
| 07Apr2011 | 8925  | 744.39  | 26.99177 | 2 L.FTENLTTI chr5@1256  | 3.48E-10 | 0.005054 |
| 07Apr2011 | 12018 | 730.93  | -11.0855 | 2 _FFHKVK+ chr5@2007    | 3.72E-10 | 0.005713 |
| 07Apr2011 | 12868 | 1147.25 | 13.44098 | 3 R.FQSAAIG Splice@chr  | 6.81E-14 | 0        |
| 07Apr2011 | 9732  | 996.99  | -24.37   | 2 K.SHCRSRF chr5@4504   | 5.67E-10 | 0.008838 |
| 07Apr2011 | 8606  | 835.92  | -2.26621 | 2 T.MRCVGK chrX@1194    | 5.57E-10 | 0.008194 |
| 07Apr2011 | 12752 | 970.45  | -29.5364 | 3 _VACNKM Splice@chr    | 4.77E-10 | 0.00711  |
| 07Apr2011 | 11133 | 1028.99 | -16.6017 | 2 R.SQMDILC chrX@1395   | 4.81E-10 | 0.007268 |
| 07Apr2011 | 7507  | 660.7   | 6.141439 | 3 R.KIANKW chr3@2521    | 1.72E-10 | 0.001736 |
| 07Apr2011 | 3496  | 677.95  | -11.2748 | 3 _VGDCPGI Splice@chr   | 4.51E-10 | 0.006955 |
| 07Apr2011 | 9176  | 565.99  | -4.32119 | 3 R.LIRNSDKI Splice@chr | 6.50E-12 | 0        |
| 07Apr2011 | 729   | 420.68  | -22.1784 | 2 R.MMTGT chrX@9534     | 3.61E-12 | 0        |
| 07Apr2011 | 6611  | 705.83  | -3.72364 | 2 M.PSMEEV chr5@4890    | 1.79E-15 | 0        |
| 07Apr2011 | 8239  | 858.48  | 6.006088 | 3 _LETGIKPI Splice@chr  | 6.60E-12 | 0        |
| 07Apr2011 | 8711  | 833.42  | -19.2103 | 2 _IIEPYVAV Splice@chr  | 3.24E-10 | 0.00443  |
| 07Apr2011 | 9427  | 996.49  | -22.685  | 2 K.SHCRSRF chr5@4504   | 6.08E-11 | 6.62E-04 |
| 07Apr2011 | 5459  | 1051.15 | 14.87916 | 3 E.GGDWSH Splice@chr   | 6.24E-13 | 0        |
| 07Apr2011 | 10897 | 1003.19 | 17.13413 | 3 R.CWNRRA Splice@chr   | 1.67E-12 | 0        |
| 07Apr2011 | 5466  | 831.39  | -27.5413 | 2 K.KFTFEIEE chrX@1364  | 2.59E-10 | 0.003465 |
| 07Apr2011 | 8214  | 836.42  | -4.27527 | 2 T.MRCVGK chrX@1194    | 3.49E-10 | 0.004576 |
| 07Apr2011 | 11744 | 962.87  | -13.9599 | 3 F.FKVIPGV chrX@9955   | 2.40E-11 | 0        |
| 07Apr2011 | 8039  | 645.82  | 10.03361 | 2 K.IVQNFSFI chr5@1950  | 5.52E-10 | 0.007198 |

|           |       |         |          |                         |          |          |
|-----------|-------|---------|----------|-------------------------|----------|----------|
| 07Apr2011 | 7140  | 554.26  | 6.682444 | 2 R.M+15.99 Splice@chr  | 6.50E-10 | 0.008475 |
| 07Apr2011 | 6926  | 671.37  | -24.0361 | 2 T.FNIVHTQ Splice@chr  | 2.03E-10 | 0.001655 |
| 07Apr2011 | 2808  | 546.78  | -19.0827 | 2 K.ETETGITC chr4@1221  | 3.75E-10 | 0.004576 |
| 07Apr2011 | 8032  | 430.88  | 3.97558  | 3 K.IVQNFSFI chr5@1950  | 3.86E-10 | 0.004576 |
| 07Apr2011 | 949   | 562.31  | -13.4391 | 2 R.FYLLYLYK Splice@chr | 4.80E-11 | 4.43E-04 |
| 07Apr2011 | 7783  | 580.66  | 3.439687 | 3 _LDLFEYSI chr3@2551   | 4.49E-10 | 0.006485 |
| 07Apr2011 | 5771  | 647     | -10.8069 | 3 K.TKRLNGS chrX@1090   | 4.21E-10 | 0.005145 |
| 07Apr2011 | 3398  | 493.78  | -11.3951 | 2 R.KNQENLI Splice@chr  | 3.61E-10 | 0.004576 |
| 07Apr2011 | 4558  | 1116.66 | 20.02355 | 1 K.INLKVNSI chr2@7016  | 6.25E-10 | 0.008475 |
| 07Apr2011 | 8287  | 858.48  | 6.006088 | 3 _LETGIKPI Splice@chr  | 3.58E-12 | 0        |
| 07Apr2011 | 7288  | 660.7   | 6.141439 | 3 R.KIANKW/ chr3@2521   | 5.41E-10 | 0.007198 |
| 07Apr2011 | 10607 | 804.1   | 9.150142 | 3 R.QLTTLEI Splice@chr  | 7.22E-16 | 0        |
| 07Apr2011 | 7093  | 554.26  | 6.682444 | 2 R.M+15.99 Splice@chr  | 4.90E-10 | 0.006663 |
| 07Apr2011 | 3898  | 461.59  | -10.1596 | 3 K.FLISK+14 Splice@chr | 3.70E-10 | 0.004576 |
| 07Apr2011 | 10105 | 742.88  | -6.21424 | 2 K.M+15.99 chr4@1648   | 4.69E-11 | 4.43E-04 |
| 07Apr2011 | 5409  | 1051.48 | 10.55946 | 3 E.GGDWSH Splice@chr   | 5.28E-15 | 0        |
| 07Apr2011 | 10516 | 750.38  | -16.0136 | 2 V.SWQILFN Splice@chr  | 1.33E-10 | 0.001272 |
| 07Apr2011 | 11654 | 491.64  | 23.22207 | 3 R.LLLDKPLF Splice@chr | 2.22E-10 | 0.00268  |
| 07Apr2011 | 5596  | 831.39  | -27.5413 | 2 K.KFTFEIEE chrX@1364  | 8.87E-11 | 0.001072 |
| 07Apr2011 | 7440  | 578.83  | 0.845038 | 2 R.LSLPQGC Splice@chr  | 3.65E-10 | 0.004576 |
| 07Apr2011 | 7194  | 660.7   | 6.141439 | 3 R.KIANKW/ chr3@2521   | 3.80E-10 | 0.004576 |
| 07Apr2011 | 10706 | 890.45  | 26.12723 | 2 K.GWSVPLI Splice@chr  | 6.43E-10 | 0.008475 |
| 07Apr2011 | 10555 | 750.38  | -16.0136 | 2 V.SWQILFN Splice@chr  | 6.78E-10 | 0.009795 |
| 07Apr2011 | 6694  | 851.49  | -3.4814  | 2 K.RGVRLSH chr2@2785   | 1.18E-10 | 0.001272 |
| 07Apr2011 | 9134  | 605.89  | 3.73347  | 2 _KVLHQVL chr2@1241    | 1.49E-10 | 0.001655 |
| 07Apr2011 | 10963 | 864.95  | 22.09183 | 2 R.KSSTLMR chr4@1655   | 2.04E-11 | 0        |
| 07Apr2011 | 10293 | 732.07  | 19.51873 | 3 R.ATDDWII Splice@chr  | 6.09E-10 | 0.008475 |
| 07Apr2011 | 6658  | 705.83  | -3.72364 | 2 M.PSMEEV chr5@4890    | 4.01E-13 | 0        |
| 07Apr2011 | 12012 | 1118.57 | -6.04397 | 3 _MRQTRSI chr1@1434    | 1.49E-10 | 0.001348 |
| 07Apr2011 | 9318  | 833.42  | -19.2103 | 2 _IIEPYVAV Splice@chr  | 4.51E-10 | 0.006496 |
| 07Apr2011 | 7628  | 554.26  | 6.682444 | 2 R.M+15.99 Splice@chr  | 4.03E-10 | 0.005573 |
| 07Apr2011 | 10020 | 996.49  | -22.685  | 2 K.SHCRSRF chr5@4504   | 6.50E-10 | 0.009435 |
| 07Apr2011 | 2447  | 620.85  | 23.40758 | 2 C.QLTALGA chr4@7065   | 3.72E-10 | 0.005293 |
| 07Apr2011 | 5880  | 829.89  | -16.1259 | 2 R.FEVFEIEC chr4@7295  | 5.37E-10 | 0.008296 |
| 07Apr2011 | 8797  | 835.92  | -2.26621 | 2 T.MRCVGK chrX@1194    | 8.76E-11 | 6.96E-04 |
| 07Apr2011 | 5691  | 646.67  | -3.90727 | 3 K.TKRLNGS chrX@1090   | 1.85E-10 | 0.002344 |
| 07Apr2011 | 12576 | 491.64  | 23.22207 | 3 R.LLLDKPLF Splice@chr | 1.80E-11 | 3.71E-04 |
| 07Apr2011 | 12354 | 634.84  | 6.410455 | 2 R.VDIGDILF Splice@chr | 3.12E-12 | 2.06E-04 |
| 07Apr2011 | 5950  | 831.39  | -27.5413 | 2 K.KFTFEIEE chrX@1364  | 3.53E-11 | 5.31E-04 |
| 07Apr2011 | 8658  | 833.93  | -9.2006  | 2 _IIEPYVAV Splice@chr  | 6.48E-11 | 5.31E-04 |
| 07Apr2011 | 12312 | 730.93  | -11.0855 | 2 _FFHKVK+ chr5@2007    | 4.26E-10 | 0.005886 |
| 07Apr2011 | 13155 | 581.95  | -26.8252 | 3 R.VKSEHQI chr4@1532   | 1.56E-10 | 0.001348 |
| 07Apr2011 | 3398  | 434.24  | 13.9946  | 3 _RSNDQTI chr5@6378    | 3.83E-10 | 0.00544  |
| 07Apr2011 | 813   | 562.31  | -13.4391 | 2 R.FYLLYLYK Splice@chr | 5.75E-11 | 5.31E-04 |
| 07Apr2011 | 6036  | 897.42  | -27.6753 | 3 _QVREMH Splice@chr    | 3.36E-10 | 0.00469  |
| 07Apr2011 | 5858  | 831.39  | -27.5413 | 2 K.KFTFEIEE chrX@1364  | 1.16E-10 | 8.56E-04 |
| 07Apr2011 | 10395 | 611.35  | -26.7997 | 2 F.LLISVPFSI chr5@9998 | 4.00E-10 | 0.005573 |

|           |       |         |          |                          |          |          |
|-----------|-------|---------|----------|--------------------------|----------|----------|
| 07Apr2011 | 8840  | 762.43  | 16.40509 | 2 _..MK+14.0 chr4@7749   | 4.12E-10 | 0.005573 |
| 07Apr2011 | 2500  | 620.85  | 23.40758 | 2 C.QLTALGA chr4@7065    | 6.63E-10 | 0.009435 |
| 07Apr2011 | 12427 | 818.45  | 0.561653 | 2 K.RTIVSVRf chrX@8304   | 3.62E-10 | 0.005154 |
| 07Apr2011 | 5996  | 831.39  | -27.5413 | 2 K.KFTFEIEE chrX@1364   | 5.22E-11 | 5.31E-04 |
| 07Apr2011 | 6150  | 1051.15 | 14.87916 | 3 E.GGDWSH Splice@chr    | 3.58E-12 | 2.06E-04 |
| 07Apr2011 | 10686 | 643.68  | -9.56031 | 3 I.VSWWDN Splice@chr    | 1.09E-10 | 8.56E-04 |
| 07Apr2011 | 7690  | 660.7   | 6.141439 | 3 R.KIANKWf chr3@2521    | 3.73E-10 | 0.005293 |
| 07Apr2011 | 11886 | 828.1   | -20.3497 | 3 R.RK+14.01 Splice@chr  | 3.72E-10 | 0.005293 |
| 07Apr2011 | 11746 | 864.95  | 22.09183 | 2 R.KSSTLMR chr4@1655    | 1.19E-11 | 3.71E-04 |
| 07Apr2011 | 5742  | 1051.48 | 10.55946 | 3 E.GGDWSH Splice@chr    | 7.09E-15 | 0        |
| 07Apr2011 | 3740  | 608.3   | -9.42515 | 4 R.ESFNLNY chr3@9522    | 5.13E-10 | 0.007697 |
| 07Apr2011 | 8743  | 835.92  | -2.26621 | 2 T.MRCVGKf chrX@1194    | 2.92E-10 | 0.003918 |
| 07Apr2011 | 2723  | 423.26  | 23.30279 | 2 K.LGAETVV chr2@6180    | 3.45E-10 | 0.004998 |
| 07Apr2011 | 4057  | 614     | 16.37291 | 3 R.EVTLLIEN chr1@7883   | 1.98E-10 | 0.002667 |
| 07Apr2011 | 12325 | 634.84  | 6.410455 | 2 R.VDIGDILF Splice@chr  | 2.85E-13 | 0        |
| 07Apr2011 | 1013  | 510.3   | 12.8833  | 2 R.RHVAYVF chr1@1479    | 6.54E-12 | 2.06E-04 |
| 07Apr2011 | 8819  | 858.48  | 6.006088 | 3 _..LETGIKPI Splice@chr | 1.54E-10 | 0.001348 |
| 07Apr2011 | 7185  | 851.48  | -15.2578 | 2 K.RGVRLSH chr2@2785    | 4.81E-10 | 0.00724  |
| 07Apr2011 | 846   | 687.4   | -22.3188 | 1 K.KGANLGF chr2@4658    | 6.57E-10 | 0.009435 |
| 07Apr2011 | 1358  | 463.3   | -2.70655 | 2 K.LTVIARPF chr3@1376   | 5.26E-10 | 0.007999 |
| 07Apr2011 | 13114 | 1147.24 | 4.705638 | 3 R.FQSAAIG Splice@chr   | 5.71E-12 | 2.06E-04 |
| 07Apr2011 | 11261 | 750.38  | -16.0136 | 2 V.SWQILFN Splice@chr   | 8.68E-11 | 6.96E-04 |
| 07Apr2011 | 4812  | 1116.65 | 11.05125 | 1 K.INLKVNSI chr2@7016   | 3.71E-10 | 0.005293 |
| 07Apr2011 | 3405  | 493.78  | -11.3951 | 2 R.KNQENLI Splice@chr   | 6.30E-10 | 0.009163 |
| 07Apr2011 | 5799  | 1051.48 | 10.55946 | 3 E.GGDWSH Splice@chr    | 6.56E-14 | 0        |
| 07Apr2011 | 5801  | 831.39  | -27.5413 | 2 K.KFTFEIEE chrX@1364   | 5.97E-10 | 0.009046 |
| 07Apr2011 | 5800  | 1051.15 | 14.87916 | 3 E.GGDWSH Splice@chr    | 2.59E-13 | 0        |
| 07Apr2011 | 2643  | 437.23  | -20.8939 | 3 I.LVWGGGf chrX@2603    | 5.78E-10 | 0.009525 |
| 07Apr2011 | 9015  | 858.48  | 6.006088 | 3 _..LETGIKPI Splice@chr | 7.32E-12 | 0        |
| 07Apr2011 | 6410  | 916.99  | 7.263111 | 2 _..LK+14.01 chr1@6453  | 3.03E-10 | 0.003569 |
| 07Apr2011 | 5881  | 831.39  | -27.5413 | 2 K.KFTFEIEE chrX@1364   | 2.49E-10 | 0.002617 |
| 07Apr2011 | 6162  | 1051.15 | 14.87916 | 3 E.GGDWSH Splice@chr    | 1.14E-11 | 0        |
| 07Apr2011 | 11568 | 876.39  | -6.29995 | 3 K.GCSSNLE chr2@8466    | 5.92E-10 | 0.009674 |
| 07Apr2011 | 13660 | 770.14  | -7.12376 | 4 _..MSLIREKf chr3@1233  | 4.12E-10 | 0.006364 |
| 07Apr2011 | 10827 | 644.01  | -16.492  | 3 I.VSWWDN Splice@chr    | 8.53E-11 | 0.00104  |
| 07Apr2011 | 6596  | 900.41  | -13.3008 | 2 L.K+14.016 Splice@chr  | 3.19E-10 | 0.004366 |
| 07Apr2011 | 11858 | 864.95  | 22.09183 | 2 R.KSSTLMR chr4@1655    | 9.47E-11 | 0.00104  |
| 07Apr2011 | 1060  | 562.31  | -13.4391 | 2 R.FYLLYLYK Splice@chr  | 4.82E-11 | 1.80E-04 |
| 07Apr2011 | 9439  | 833.43  | -7.18554 | 2 _..IIEPYVAV Splice@chr | 3.44E-10 | 0.005312 |
| 07Apr2011 | 7268  | 671.37  | -24.0361 | 2 T.FNIVHTQ Splice@chr   | 2.59E-10 | 0.002617 |
| 07Apr2011 | 12482 | 634.84  | 6.410455 | 2 R.VDIGDILF Splice@chr  | 8.53E-13 | 0        |
| 07Apr2011 | 8955  | 858.48  | 6.006088 | 3 _..LETGIKPI Splice@chr | 1.50E-11 | 0        |
| 07Apr2011 | 11893 | 864.95  | 22.09183 | 2 R.KSSTLMR chr4@1655    | 6.45E-11 | 8.87E-04 |
| 07Apr2011 | 5979  | 831.4   | -15.4799 | 2 K.KFTFEIEE chrX@1364   | 2.17E-11 | 1.80E-04 |
| 07Apr2011 | 11364 | 750.38  | -16.0136 | 2 V.SWQILFN Splice@chr   | 2.95E-10 | 0.003254 |
| 07Apr2011 | 11604 | 890.45  | 26.12723 | 2 K.GWSVPLI Splice@chr   | 1.37E-10 | 0.001862 |
| 07Apr2011 | 8913  | 836.42  | -4.27527 | 2 T.MRCVGKf chrX@1194    | 3.67E-10 | 0.005935 |

|           |       |         |          |                         |          |          |
|-----------|-------|---------|----------|-------------------------|----------|----------|
| 07Apr2011 | 5751  | 1051.48 | 10.55946 | 3 E.GGDWSH Splice@chr   | 3.94E-14 | 0        |
| 07Apr2011 | 789   | 420.68  | -22.1784 | 2 R.MMTGTG chrX@9534    | 7.30E-12 | 0        |
| 07Apr2011 | 12885 | 1113.57 | 4.116397 | 3 R.ELGPIDIL chr4@3717  | 2.49E-10 | 0.002617 |
| 07Apr2011 | 7213  | 671.37  | -24.0361 | 2 T.FNIVHTQ Splice@chr  | 1.66E-10 | 0.002168 |
| 07Apr2011 | 2871  | 620.85  | 23.40758 | 2 C.QLTALGA chr4@7065   | 3.75E-10 | 0.006086 |
| 07Apr2011 | 9127  | 653.89  | -28.8863 | 2 K.NKLLKSY chr3@1375   | 4.61E-10 | 0.006966 |
| 07Apr2011 | 7757  | 554.26  | 6.682444 | 2 R.M+15.99 Splice@chr  | 1.09E-10 | 0.001381 |
| 07Apr2011 | 10261 | 675.33  | -24.7716 | 2 K.IEMEFLVI chrX@1244  | 3.17E-10 | 0.004208 |
| 07Apr2011 | 7251  | 851.49  | -3.4814  | 2 K.RGVRLSH chr2@2785   | 1.76E-10 | 0.002168 |
| 07Apr2011 | 9483  | 833.43  | -7.18554 | 2 _IIEPYVAV Splice@chr  | 2.62E-10 | 0.002617 |
| 07Apr2011 | 11868 | 1011.18 | 15.38734 | 3 R.CWNRRA Splice@chr   | 1.73E-10 | 0.002168 |
| 07Apr2011 | 8963  | 836.42  | -4.27527 | 2 T.MRCVGK chrX@1194    | 5.26E-10 | 0.008788 |
| 07Apr2011 | 7840  | 660.7   | 6.141439 | 3 R.KIANKW chr3@2521    | 3.01E-10 | 0.003569 |
| 07Apr2011 | 7596  | 748.73  | -12.625  | 3 R.LPSKENL chr4@5639   | 5.46E-10 | 0.009088 |
| 07Apr2011 | 6463  | 917.49  | 5.431846 | 2 _LK+14.01 chr1@6453   | 4.77E-10 | 0.007268 |
| 07Apr2011 | 5246  | 628.32  | 10.85905 | 2 R.ISYQAMA Splice@chr  | 4.12E-10 | 0.006364 |
| 07Apr2011 | 1687  | 536.29  | -10.9462 | 2 _QVEFNPI Splice@chr   | 7.17E-11 | 0.00104  |
| 11Nov2011 | 16692 | 851.48  | -15.2578 | 2 K.RGVRLSH chr2@2785   | 1.43E-10 | 0.00362  |
| 11Nov2011 | 20814 | 833.92  | -21.2254 | 2 _IIEPYVAV Splice@chr  | 2.19E-12 | 2.18E-04 |
| 11Nov2011 | 14875 | 1346.12 | -11.1429 | 2 _QVREMH Splice@chr    | 1.69E-10 | 0.004418 |
| 11Nov2011 | 11804 | 724.34  | 5.400383 | 3 V.CLTEEGK Splice@chr  | 1.94E-12 | 2.18E-04 |
| 11Nov2011 | 22174 | 849.92  | 6.583873 | 2 Q.DSSYFVE Splice@chr  | 4.16E-13 | 0        |
| 11Nov2011 | 26308 | 849.41  | -3.23735 | 2 Q.DSSYFVE Splice@chr  | 8.54E-11 | 0.00231  |
| 11Nov2011 | 6704  | 936.48  | 27.86052 | 1 K.LNGGYEC chr2@1191   | 2.64E-10 | 0.006344 |
| 11Nov2011 | 11876 | 1086.01 | 9.000639 | 2 V.CLTEEGK Splice@chr  | 3.09E-10 | 0.006813 |
| 11Nov2011 | 15347 | 1075.05 | -16.1169 | 2 R.TCSK+14. chr2@1253  | 2.31E-10 | 0.005743 |
| 11Nov2011 | 3826  | 418.89  | -10.5715 | 3 R.ENFATKC chr5@5231   | 1.46E-10 | 0.003674 |
| 11Nov2011 | 11383 | 724.34  | 5.400383 | 3 V.CLTEEGK Splice@chr  | 1.54E-10 | 0.003785 |
| 11Nov2011 | 11810 | 1086.01 | 9.000639 | 2 V.CLTEEGK Splice@chr  | 5.40E-11 | 0.001737 |
| 11Nov2011 | 30001 | 968.13  | 18.26018 | 3 _GCSIVPIS Splice@chr  | 1.15E-10 | 0.003048 |
| 11Nov2011 | 20339 | 664.7   | 1.197202 | 3 _PTLNK+1. chr1@6526   | 1.84E-10 | 0.004865 |
| 11Nov2011 | 2976  | 510.3   | 12.8833  | 2 R.RHVAYVF chr1@1475   | 1.91E-10 | 0.005032 |
| 11Nov2011 | 11109 | 1063.58 | 1.14882  | 1 K.YLINGNEI chr1@8687  | 2.54E-10 | 0.006178 |
| 11Nov2011 | 18477 | 1128.04 | -2.03078 | 2 _IPSAVGY Splice@chr   | 7.62E-12 | 2.70E-04 |
| 11Nov2011 | 11286 | 624.33  | 9.752617 | 2 R.QHAYAVI chrX@1402   | 3.36E-10 | 0.007296 |
| 11Nov2011 | 11120 | 1064.58 | -2.00842 | 1 K.YLINGNEI chr1@8687  | 1.02E-10 | 0.002714 |
| 11Nov2011 | 22182 | 1056.89 | 23.76658 | 3 I.SRVEDDS Splice@chr  | 4.84E-15 | 0        |
| 11Nov2011 | 11171 | 1064.58 | -2.00842 | 1 K.YLINGNEI chr1@8687  | 1.91E-10 | 0.005032 |
| 11Nov2011 | 28724 | 634.33  | -6.74606 | 2 R.VDIGDILF Splice@chr | 1.84E-10 | 0.004865 |
| 11Nov2011 | 20821 | 516.3   | 4.106203 | 3 R.NIIFLMVI chrX@1294  | 3.98E-10 | 0.008321 |
| 11Nov2011 | 30043 | 968.46  | 13.6538  | 3 _GCSIVPIS Splice@chr  | 1.88E-11 | 3.94E-04 |
| 11Nov2011 | 18610 | 833.93  | -9.2006  | 2 _IIEPYVAV Splice@chr  | 2.48E-10 | 0.00504  |
| 11Nov2011 | 17616 | 1128.04 | -2.03078 | 2 _IPSAVGY Splice@chr   | 1.02E-10 | 0.002832 |
| 11Nov2011 | 24998 | 849.91  | -5.21446 | 2 Q.DSSYFVE Splice@chr  | 2.19E-11 | 4.37E-04 |
| 11Nov2011 | 11149 | 975.55  | -20.6673 | 1 K.IPKMPVY chr2@1115   | 9.72E-11 | 0.002574 |
| 11Nov2011 | 29685 | 1147.25 | 13.44098 | 3 R.FQSAAIG Splice@chr  | 1.26E-12 | 0        |
| 11Nov2011 | 10523 | 1064.58 | -2.00842 | 1 K.YLINGNEI chr1@8687  | 4.84E-11 | 0.001265 |

|           |       |         |          |                         |          |          |
|-----------|-------|---------|----------|-------------------------|----------|----------|
| 11Nov2011 | 19852 | 516.31  | 23.5317  | 3 R.NIIFLMVI chrX@1294  | 4.41E-10 | 0.008663 |
| 11Nov2011 | 10576 | 1064.58 | -2.00842 | 1 K.YLINGNEI chr1@8687  | 2.03E-10 | 0.004303 |
| 07Apr2011 | 11442 | 1179.27 | 15.60961 | 3 K.ENLNFYR chr4@1167   | 3.55E-10 | 0.004576 |
| 07Apr2011 | 3623  | 622.84  | 8.273721 | 4 R.LSTSIDGS Splice@chr | 1.70E-10 | 0.003467 |
| 07Apr2011 | 11433 | 1077.07 | -10.2096 | 2 _K+14.016 chr3@1962   | 2.93E-10 | 0.00723  |
| 07Apr2011 | 8740  | 682.43  | 20.06414 | 2 K.LK+14.01 chrX@1255  | 4.59E-10 | 0.007729 |
| 07Apr2011 | 2645  | 654.83  | 5.414405 | 2 K.FFLAQN Splice@chr   | 4.92E-10 | 0.009369 |
| 07Apr2011 | 12333 | 958.5   | -14.2531 | 2 K.MMRRM chr1@1080     | 6.85E-10 | 0.009979 |
| 07Apr2011 | 9325  | 458.26  | -1.66853 | 2 R.RHHPGRI Splice@chr  | 3.97E-10 | 0.007304 |
| 07Apr2011 | 2089  | 430.89  | 24.70532 | 3 K.K+14.016 chr1@1255  | 1.86E-10 | 0.005213 |
| 07Apr2011 | 3604  | 439.01  | 20.60226 | 4 K.LVEDNNL Splice@chr  | 5.47E-11 | 0.001367 |
| 07Apr2011 | 17172 | 1057.05 | 24.08513 | 2 _LNMKVV' chrX@7188    | 3.73E-10 | 0.008076 |
| 11Nov2011 | 3502  | 615.8   | -16.0827 | 2 _QLEISFD' Splice@chr  | 3.52E-11 | 7.84E-04 |
| 07Apr2011 | 9671  | 1078.22 | -24.4011 | 3 Q.K+14.016 chr1@1839  | 4.51E-10 | 0.007729 |
| 07Apr2011 | 16870 | 994.83  | -0.47028 | 3 R.CVFDGC\ Splice@chr  | 4.38E-10 | 0.009093 |
| 07Apr2011 | 11052 | 1055.51 | 14.70187 | 2 R.ICEHCGE' chr2@7516  | 5.29E-10 | 0.007282 |
| 11Nov2011 | 33596 | 978.52  | -7.74817 | 1 _K+14.016 chr2@7055   | 3.52E-10 | 0.007626 |
| 07Apr2011 | 1791  | 485.25  | -8.57083 | 2 R.IEEINHSK chr1@1120  | 2.07E-10 | 0.00353  |
| 07Apr2011 | 2131  | 485.25  | -8.57083 | 2 R.IEEINHSK chr1@1120  | 5.12E-10 | 0.008065 |
| 11Nov2011 | 13269 | 565.83  | 14.11658 | 2 R.ISLTNANI chr5@7795  | 4.52E-10 | 0.009059 |
| 11Nov2011 | 13181 | 565.83  | 14.11658 | 2 R.ISLTNANI chr5@7795  | 4.63E-10 | 0.009219 |
| 07Apr2011 | 12670 | 735.63  | -25.7426 | 4 _K+14.016 chr4@4449   | 2.41E-10 | 0.004779 |
| 07Apr2011 | 4284  | 565.29  | -7.06668 | 3 K.SHRPSKD chrX@1587   | 7.55E-10 | 0.009526 |
| 07Apr2011 | 646   | 703.4   | 1.477236 | 1 K.SVLAGEK Splice@chr  | 7.00E-10 | 0.009828 |
| 07Apr2011 | 10751 | 924.81  | -11.1689 | 3 I.KNTLNYVI chrX@1554  | 4.23E-10 | 0.009346 |
| 11Nov2011 | 27018 | 1188.07 | -27.4409 | 2 M.DFLNDE' chr4@1550   | 4.97E-10 | 0.009851 |
| 11Nov2011 | 28514 | 957.16  | 16.76738 | 3 K.LFQVLQN Splice@chr  | 1.61E-10 | 0.004073 |
| 07Apr2011 | 5736  | 510.76  | 25.44433 | 2 K.NSATNNI chr2@1349   | 4.64E-10 | 0.006525 |
| 07Apr2011 | 5151  | 651.35  | 18.86437 | 2 N.FIHMSCC chr2@5132   | 2.98E-10 | 0.005622 |
| 11Nov2011 | 7551  | 463.77  | 1.18704  | 2 K.PVNIENLI chrX@1210  | 7.67E-11 | 0.002021 |
| 11Nov2011 | 31703 | 1123.26 | -4.9137  | 3 R.REGVLNF Splice@chr  | 8.00E-11 | 0.002201 |
| 07Apr2011 | 1256  | 506.27  | 23.31475 | 2 K.PFFNMV' chrX@1235   | 1.22E-10 | 0.003276 |
| 11Nov2011 | 17095 | 901.51  | -22.2083 | 2 K.LPELK+14 chr4@1282  | 3.20E-10 | 0.007084 |
| 07Apr2011 | 6220  | 933.46  | -25.094  | 1 R.EKGEGKE chr5@2625   | 4.29E-10 | 0.006013 |
| 07Apr2011 | 3994  | 674.87  | -22.281  | 2 R.VELQTSK chrX@3355   | 5.46E-11 | 7.98E-04 |
| 07Apr2011 | 10231 | 917.07  | -8.59491 | 2 K.LWIYISKK Splice@chr | 2.04E-10 | 0.004157 |
| 07Apr2011 | 10447 | 964.49  | -27.7909 | 2 R.KVNM+1 Splice@chr   | 5.36E-10 | 0.008934 |
| 07Apr2011 | 14905 | 882.94  | -23.1143 | 2 T.M+15.99 chr2@8172   | 5.22E-10 | 0.007693 |
| 07Apr2011 | 526   | 405.21  | -4.37903 | 2 R.IEHADPK chr4@6332   | 2.30E-10 | 0.005817 |
| 07Apr2011 | 12230 | 875.53  | 29.49987 | 3 R.RLICSSSG chr5@1461  | 5.94E-11 | 8.29E-04 |
| 07Apr2011 | 12910 | 875.53  | 29.49987 | 3 R.RLICSSSG chr5@1461  | 1.18E-10 | 0.003469 |
| 07Apr2011 | 14192 | 875.53  | 29.49987 | 3 R.RLICSSSG chr5@1461  | 2.72E-10 | 0.006024 |
| 07Apr2011 | 2961  | 435.26  | -19.2751 | 2 R.LVISSPPR Splice@chr | 3.80E-10 | 0.008954 |
| 07Apr2011 | 13464 | 884.93  | -20.4385 | 2 K.IDNFFTIC chr1@1320  | 3.85E-10 | 0.006969 |
| 07Apr2011 | 11630 | 819.47  | -13.9149 | 2 K.LGMFRKI chr4@8785   | 1.40E-10 | 0.003926 |
| 07Apr2011 | 12343 | 610.57  | -10.4919 | 4 _MENIGTC chr4@1236    | 4.48E-10 | 0.006955 |
| 07Apr2011 | 8686  | 461.75  | 3.907921 | 2 K.SFLDIAEK chr2@2134  | 6.30E-10 | 0.009416 |

|           |       |         |          |                         |          |          |
|-----------|-------|---------|----------|-------------------------|----------|----------|
| 07Apr2011 | 3451  | 472.29  | -17.046  | 2 _._ALSIARG\ chrX@1078 | 2.99E-10 | 0.006338 |
| 11Nov2011 | 1507  | 632.32  | 18.30532 | 1 K.GGSGPE\ chrX@7978   | 6.81E-11 | 0.001905 |
| 07Apr2011 | 8049  | 685.37  | 6.778141 | 2 _._IWSSHSV chr2@2795  | 3.38E-10 | 0.005578 |
| 11Nov2011 | 639   | 702.38  | 2.001521 | 1 _._DAAGLAC chr3@2528  | 5.12E-12 | 2.70E-04 |
| 11Nov2011 | 548   | 702.38  | 2.001521 | 1 _._DAAGLAC chr3@2528  | 5.12E-12 | 7.72E-05 |
| 11Nov2011 | 16344 | 1146.06 | 8.879919 | 2 K.VIGIQEY\ Splice@chr | 4.56E-10 | 0.009167 |
| 11Nov2011 | 16267 | 1146.06 | 8.879919 | 2 K.VIGIQEY\ Splice@chr | 3.18E-10 | 0.007032 |
| 11Nov2011 | 15465 | 1146.06 | 8.879919 | 2 K.VIGIQEY\ Splice@chr | 3.95E-10 | 0.007826 |
| 07Apr2011 | 12012 | 866.54  | 25.01481 | 2 K.FQRKVRN chrX@1535   | 1.57E-10 | 0.002882 |
| 11Nov2011 | 12943 | 977.48  | 0.875082 | 1 R.VEEKSEE\ chrX@7236  | 1.13E-10 | 0.003024 |
| 11Nov2011 | 18711 | 719.38  | 14.92317 | 2 R.FTQAGSE Splice@chr  | 2.84E-13 | 0        |
| 11Nov2011 | 18806 | 719.38  | 14.92317 | 2 R.FTQAGSE Splice@chr  | 7.59E-13 | 7.76E-05 |
| 11Nov2011 | 16145 | 589.32  | 4.326453 | 3 K.YLNK+14. chr4@1375  | 3.44E-10 | 0.007349 |
| 07Apr2011 | 10184 | 1000.01 | -18.1227 | 2 L.SRGVTVS chr5@1312   | 2.64E-10 | 0.003601 |
| 07Apr2011 | 12543 | 994.15  | 22.07156 | 3 _._CFTIFSEQ chr2@2546 | 1.92E-10 | 0.002667 |
| 11Nov2011 | 29960 | 807.46  | 29.20247 | 3 K.TPTPGSD Splice@chr  | 1.68E-10 | 0.003827 |
| 07Apr2011 | 7080  | 869.46  | -10.8632 | 2 K.KAK+14.( chr2@9136  | 4.41E-10 | 0.00968  |
| 11Nov2011 | 799   | 556.31  | 12.70857 | 2 K.KNAEFFLI chr1@9695  | 1.71E-10 | 0.004472 |
| 11Nov2011 | 6245  | 604.31  | 24.98924 | 2 K.ERDRYSP chr5@7314   | 3.94E-10 | 0.007826 |
| 07Apr2011 | 14305 | 914.49  | -16.5033 | 2 R.K+14.016 chr1@1292  | 2.47E-10 | 0.00359  |
| 07Apr2011 | 14353 | 761.98  | -14.2445 | 2 K.LKHKLK+ chr3@1397   | 1.41E-10 | 0.002093 |
| 07Apr2011 | 13685 | 761.98  | -14.2445 | 2 K.LKHKLK+ chr3@1397   | 7.69E-11 | 0.001898 |
| 07Apr2011 | 13034 | 657.09  | 19.44359 | 4 K.AYGRNEC Splice@chr  | 3.35E-10 | 0.007062 |
| 07Apr2011 | 9880  | 1118.93 | 20.33541 | 3 R.NWKPKT Splice@chr   | 4.27E-12 | 2.47E-04 |
| 07Apr2011 | 11896 | 1118.93 | 20.33541 | 3 R.NWKPKT Splice@chr   | 3.78E-10 | 0.008197 |
| 07Apr2011 | 10868 | 1118.93 | 20.33541 | 3 R.NWKPKT Splice@chr   | 1.37E-11 | 3.43E-04 |
| 07Apr2011 | 9627  | 1118.93 | 20.33541 | 3 R.NWKPKT Splice@chr   | 3.59E-10 | 0.008374 |
| 07Apr2011 | 9560  | 1118.93 | 20.33541 | 3 R.NWKPKT Splice@chr   | 5.97E-10 | 0.009286 |
| 07Apr2011 | 11467 | 866.54  | -7.40428 | 2 K.KKKLLKIK chr5@1167  | 3.71E-10 | 0.007836 |
| 11Nov2011 | 23143 | 804.9   | 13.41057 | 2 _._LTMTWN chr1@4515   | 3.84E-10 | 0.008217 |
| 07Apr2011 | 14212 | 997.29  | 20.12254 | 3 K.KKLQKSK Splice@chr  | 9.72E-11 | 0.001363 |
| 07Apr2011 | 3718  | 886.49  | -11.6197 | 2 _._FRRWIPC chr4@1907  | 3.15E-11 | 7.77E-04 |
| 07Apr2011 | 1382  | 437.25  | 16.32324 | 3 R.KKYGGG( chr5@1175   | 2.41E-10 | 0.003445 |
| 11Nov2011 | 5798  | 433.76  | 2.609238 | 2 _._IVDLPGPI chr3@1104 | 1.17E-10 | 0.003048 |
| 07Apr2011 | 8544  | 889.49  | 24.16207 | 2 R.GKHEHE/ chr5@5064   | 8.16E-11 | 0.002034 |
| 07Apr2011 | 11071 | 578.36  | 0.528578 | 2 K.KWK+14. chrX@1579   | 1.70E-10 | 0.003078 |
| 07Apr2011 | 9038  | 753.88  | 7.215259 | 2 R.THVDGHI chr2@1265   | 2.21E-10 | 0.003163 |
| 07Apr2011 | 4359  | 679.32  | -24.6258 | 2 K.KTCFVSD chr2@1289   | 1.34E-10 | 0.001906 |
| 11Nov2011 | 10562 | 1161.66 | -19.4191 | 1 K.NSKDKLV Splice@chr  | 2.94E-10 | 0.006542 |
| 07Apr2011 | 6934  | 483.26  | -24.8926 | 2 R.RANIPAS chr3@2865   | 7.35E-11 | 0.001178 |
| 07Apr2011 | 1712  | 531.29  | 18.41624 | 2 K.QMLSSSF Splice@chr  | 1.65E-10 | 0.002882 |
| 07Apr2011 | 10427 | 959.5   | -6.6567  | 2 K.K+14.016 chr3@3114  | 2.22E-10 | 0.002491 |
| 07Apr2011 | 10674 | 747.35  | -27.1339 | 3 R.LEDK+14. Splice@chr | 2.36E-10 | 0.005817 |
| 07Apr2011 | 9866  | 785.42  | 22.95449 | 1 _._MPAWAF chr2@1115   | 2.29E-11 | 5.74E-04 |
| 07Apr2011 | 9672  | 785.42  | 22.95449 | 1 _._MPAWAF chr2@1115   | 1.74E-11 | 1.94E-04 |
| 07Apr2011 | 13321 | 1092.54 | -3.63597 | 1 K.LISEMDD chr5@6655   | 2.43E-10 | 0.00355  |
| 07Apr2011 | 12729 | 735.62  | -10.6169 | 4 S.ILQLPEIS/ chr4@1391 | 2.12E-10 | 0.004461 |

|           |       |         |          |                         |          |          |
|-----------|-------|---------|----------|-------------------------|----------|----------|
| 07Apr2011 | 10696 | 785.06  | -27.282  | 3 K.LWPNLGI chr5@1154   | 2.35E-10 | 0.004851 |
| 07Apr2011 | 8725  | 733.39  | 13.30314 | 2 R.K+14.016 chrX@1478  | 1.27E-10 | 0.002959 |
| 07Apr2011 | 11759 | 689.43  | -5.54367 | 2 R.LGKKFAG chr5@1897   | 3.19E-10 | 0.006922 |
| 07Apr2011 | 9437  | 942.46  | 21.00564 | 2 K.MFFFCYS chr1@1156   | 3.78E-10 | 0.008037 |
| 11Nov2011 | 7395  | 553.78  | -10.2208 | 2 R.TASQK+1 chrX@5438   | 1.86E-11 | 3.94E-04 |
| 07Apr2011 | 9020  | 812.93  | -0.52622 | 2 K.NYFYQKN chr1@1965   | 3.64E-10 | 0.006447 |
| 07Apr2011 | 10332 | 866.54  | 25.95111 | 2 K.K+14.016 chr4@1428  | 4.90E-12 | 0        |
| 07Apr2011 | 12305 | 866.54  | 25.95111 | 2 K.K+14.016 chr4@1428  | 1.66E-10 | 0.003658 |
| 07Apr2011 | 14225 | 945.46  | 23.4594  | 2 K.DLSCRDC chr2@8564   | 1.16E-10 | 0.002021 |
| 07Apr2011 | 11814 | 1076.55 | -19.2805 | 3 S.HGVKLG C Splice@chr | 2.24E-10 | 0.002243 |
| 07Apr2011 | 1430  | 417.97  | -11.6795 | 4 E.TLKKCGV chr3@1375   | 6.47E-10 | 0.009136 |
| 07Apr2011 | 10760 | 717.45  | 14.45187 | 2 K.GFEIK+14 chr2@9115  | 3.87E-10 | 0.006969 |
| 07Apr2011 | 8925  | 555.69  | 15.84547 | 5 R.TSTFGSN chr4@1656   | 2.92E-11 | 0.001147 |
| 07Apr2011 | 1186  | 593.02  | 14.2277  | 3 R.TTM+15. chr5@1970   | 1.38E-10 | 0.003099 |
| 07Apr2011 | 5495  | 604.33  | 18.58137 | 2 _K+14.016 chrX@1077   | 4.61E-10 | 0.007729 |
| 07Apr2011 | 6910  | 604.33  | 18.58137 | 2 _K+14.016 chrX@1077   | 2.63E-11 | 6.21E-04 |
| 07Apr2011 | 6902  | 604.33  | 18.58137 | 2 _K+14.016 chrX@1077   | 2.58E-10 | 0.003445 |
| 07Apr2011 | 3479  | 421.75  | -7.76094 | 2 R.ILESVPK chr5@2925   | 3.04E-10 | 0.003569 |
| 07Apr2011 | 10796 | 1083.67 | 26.76408 | 2 K.YNRVHFT chrX@1019   | 1.46E-11 | 4.20E-04 |
| 11Nov2011 | 33396 | 920.41  | -5.11167 | 1 K.TMSGSH` chrX@6705   | 1.24E-11 | 3.94E-04 |
| 11Nov2011 | 32694 | 1114.08 | -27.2909 | 2 _TVLQTAC chr5@1395    | 2.67E-10 | 0.006398 |
| 07Apr2011 | 14726 | 910.1   | -27.8264 | 3 R.KKSDFETi chr3@3014  | 3.17E-10 | 0.004201 |
| 11Nov2011 | 29319 | 741.87  | -26.1725 | 2 K.KIFLQM+ chr2@1507   | 4.26E-10 | 0.008695 |
| 07Apr2011 | 10508 | 1014.09 | 11.56756 | 2 _APLHNIM Splice@chr   | 2.28E-10 | 0.005395 |
| 07Apr2011 | 2441  | 714.84  | -27.7024 | 2 R.SCSK+14. Splice@chr | 9.23E-11 | 0.001363 |
| 07Apr2011 | 10697 | 1016.62 | -14.1946 | 1 R.VRLKMGI chr3@9326   | 4.81E-10 | 0.009164 |
| 07Apr2011 | 13942 | 970.59  | 24.01157 | 1 R.RIYAYKR. chr5@1438  | 5.45E-10 | 0.00799  |
| 07Apr2011 | 1295  | 586.82  | 12.39864 | 2 I.SRDPNFPi chr3@3347  | 3.39E-10 | 0.007062 |
| 07Apr2011 | 12082 | 991.06  | -8.41812 | 2 F.IFSRILQT` chrX@1756 | 1.39E-11 | 1.79E-04 |
| 07Apr2011 | 7884  | 744.97  | 29.35164 | 2 K.HLVEIGKI chrX@6514  | 1.12E-10 | 0.001577 |
| 07Apr2011 | 11582 | 887.11  | 20.42052 | 3 F.YEEMDYI` Splice@chr | 2.15E-11 | 2.27E-04 |
| 11Nov2011 | 20531 | 785.78  | -8.39956 | 3 R.NRQNLGI chr5@8305   | 6.71E-12 | 2.70E-04 |
| 07Apr2011 | 2596  | 527.77  | -10.6598 | 2 K.WQETVV chr1@5355    | 8.41E-11 | 0.001716 |
| 07Apr2011 | 2475  | 527.77  | -10.6598 | 2 K.WQETVV chr1@5355    | 9.31E-11 | 0.002846 |
| 07Apr2011 | 8792  | 711.96  | -15.7141 | 5 R.YQCQTFF chrX@1494   | 6.51E-10 | 0.009811 |
| 07Apr2011 | 13309 | 865.97  | 0.794696 | 4 R.NGRSFAF Splice@chr  | 1.19E-11 | 2.11E-04 |
| 07Apr2011 | 12622 | 870.82  | 27.636   | 3 _IGQKSKN chr3@4950    | 8.96E-11 | 0.002906 |
| 07Apr2011 | 9112  | 854.47  | 19.93024 | 2 R.ANYLKFS chr5@1542   | 5.55E-10 | 0.006929 |
| 07Apr2011 | 13932 | 1002.53 | -26.5337 | 1 R.GVHERY\ chrX@3747   | 1.13E-10 | 8.56E-04 |
| 07Apr2011 | 8385  | 444.5   | -7.40021 | 4 K.KNQQDS chrX@2807    | 4.58E-10 | 0.008124 |
| 07Apr2011 | 7719  | 915.48  | 15.68499 | 2 _WCHPPSI chr2@5042    | 5.16E-10 | 0.008788 |
| 07Apr2011 | 12004 | 894.06  | 18.31665 | 2 R.EIQKISYIL chr1@1185 | 4.90E-11 | 0.001305 |
| 07Apr2011 | 12051 | 894.06  | 18.31665 | 2 R.EIQKISYIL chr1@1185 | 8.49E-12 | 2.42E-04 |
| 07Apr2011 | 11868 | 894.06  | 18.31665 | 2 R.EIQKISYIL chr1@1185 | 1.08E-10 | 0.001907 |
| 07Apr2011 | 10372 | 894.07  | 29.52534 | 2 R.EIQKISYIL chr1@1185 | 1.59E-11 | 4.29E-04 |
| 11Nov2011 | 28100 | 825.93  | -1.59043 | 2 R.QKMSFA` Splice@chr  | 5.91E-11 | 0.00179  |
| 11Nov2011 | 28140 | 825.93  | -1.59043 | 2 R.QKMSFA` Splice@chr  | 1.75E-10 | 0.004528 |

|           |       |         |          |                         |          |          |
|-----------|-------|---------|----------|-------------------------|----------|----------|
| 11Nov2011 | 26650 | 825.94  | 10.55113 | 2 R.QKMSFA` Splice@chr  | 1.24E-10 | 0.003146 |
| 07Apr2011 | 9369  | 711.39  | -28.782  | 2 R.KRRMIM- chr5@7011   | 6.06E-10 | 0.009284 |
| 11Nov2011 | 15128 | 762.84  | -28.3604 | 2 G.TSK+14.C chr5@9327  | 4.20E-11 | 0.001133 |
| 11Nov2011 | 14311 | 762.85  | -15.3018 | 2 G.TSK+14.C chr5@9327  | 3.33E-10 | 0.006802 |
| 11Nov2011 | 9123  | 623.86  | -6.32388 | 2 R.KSLNILSL Splice@chr | 4.37E-10 | 0.008845 |
| 07Apr2011 | 13569 | 798.42  | -13.2259 | 4 R.QWQQDI chr5@5475    | 3.35E-11 | 6.21E-04 |
| 07Apr2011 | 12976 | 971.51  | 1.951012 | 3 _M+15.99 Splice@chr   | 2.32E-10 | 0.003698 |
| 07Apr2011 | 15185 | 743.7   | 29.62772 | 3 R.NFSDETL chr2@1170   | 1.71E-10 | 0.002495 |
| 07Apr2011 | 9567  | 827.43  | -28.1906 | 2 _YNQIFLAI chrX@1612   | 3.24E-10 | 0.00543  |
| 07Apr2011 | 10762 | 974.57  | 8.725546 | 1 R.LLTEWRR chr3@5374   | 4.72E-10 | 0.009164 |
| 11Nov2011 | 1025  | 423.23  | 15.28889 | 3 K.KYENVPK chr3@2545   | 4.82E-10 | 0.00959  |
| 07Apr2011 | 12452 | 966.84  | -14.9813 | 3 R.IDTTYELS chr5@1115  | 2.80E-10 | 0.00723  |
| 07Apr2011 | 11161 | 680.39  | 16.80021 | 4 _FSSKFPN` chrX@1215   | 6.70E-11 | 0.002324 |
| 07Apr2011 | 1655  | 449.55  | -11.2487 | 3 R.LEEEAHH chr4@3035   | 3.83E-10 | 0.00506  |
| 07Apr2011 | 1474  | 449.55  | -11.2487 | 3 R.LEEEAHH chr4@3035   | 1.90E-10 | 0.002875 |
| 07Apr2011 | 1230  | 449.55  | -11.2487 | 3 R.LEEEAHH chr4@3035   | 1.37E-10 | 0.001482 |
| 07Apr2011 | 10157 | 946.01  | -17.7372 | 2 I.FDK+14.0 Splice@chr | 3.46E-10 | 0.005884 |
| 07Apr2011 | 11747 | 1123.64 | -22.6165 | 2 I.FHRKFKEP chrX@2055  | 5.03E-10 | 0.009259 |
| 07Apr2011 | 11381 | 819.1   | 29.38392 | 3 K.QNSVQG Splice@chr   | 5.62E-10 | 0.00799  |
| 07Apr2011 | 2651  | 697.34  | -4.64555 | 2 R.EEVLNQN chr4@1358   | 6.45E-10 | 0.009699 |
| 07Apr2011 | 3798  | 839.95  | -19.7883 | 2 R.STHFRIEI chr2@2394  | 1.14E-10 | 0.002612 |
| 07Apr2011 | 11000 | 811.01  | 12.32914 | 2 R.EIEK+14.( chr2@7272 | 2.85E-10 | 0.00618  |
| 07Apr2011 | 1897  | 602.35  | -24.359  | 2 K.SRYVPTK Splice@chr  | 3.87E-10 | 0.004694 |
| 07Apr2011 | 15235 | 781.4   | 11.44284 | 4 K.FSVTTQC chr4@7082   | 5.63E-10 | 0.007828 |
| 07Apr2011 | 10199 | 949.6   | 15.99906 | 2 _FISTRHRF Splice@chr  | 2.90E-10 | 0.005622 |
| 07Apr2011 | 6389  | 1020.5  | -14.5478 | 1 K.MNLGLE` Splice@chr  | 8.03E-10 | 0.009696 |
| 07Apr2011 | 12859 | 911.17  | 11.35556 | 3 R.KTDNKNL Splice@chr  | 1.94E-10 | 0.001736 |
| 07Apr2011 | 2316  | 578.29  | -13.7017 | 2 R.LLFFGATI Splice@chr | 2.22E-10 | 0.0048   |
| 07Apr2011 | 3541  | 578.29  | -13.7017 | 2 R.LLFFGATI Splice@chr | 3.49E-10 | 0.00806  |
| 07Apr2011 | 10397 | 471.76  | 11.15041 | 4 R.SFQCGIT chr1@4615   | 6.09E-10 | 0.008475 |
| 07Apr2011 | 10809 | 1033.49 | 3.815824 | 2 R.CGWRW` Splice@chr   | 2.52E-10 | 0.003917 |
| 11Nov2011 | 33439 | 1129.07 | -15.453  | 2 R.K+14.016 chr2@5335  | 3.87E-10 | 0.008217 |
| 07Apr2011 | 4496  | 932.48  | 4.229841 | 2 R.FIEGPARI Splice@chr | 2.39E-10 | 0.005025 |
| 07Apr2011 | 1202  | 487.32  | 28.42794 | 2 K.GLSKTTPI chrX@4155  | 4.47E-10 | 0.009044 |
| 07Apr2011 | 10298 | 1134.05 | -14.1995 | 2 _IPSAVGY( Splice@chr  | 1.07E-14 | 0        |
| 07Apr2011 | 9524  | 1134.05 | -14.1995 | 2 _IPSAVGY( Splice@chr  | 1.97E-15 | 0        |
| 07Apr2011 | 9467  | 1134.05 | -14.1995 | 2 _IPSAVGY( Splice@chr  | 6.15E-16 | 0        |
| 07Apr2011 | 8506  | 1134.05 | -14.1995 | 2 _IPSAVGY( Splice@chr  | 2.47E-15 | 0        |
| 07Apr2011 | 8696  | 1134.05 | -14.1995 | 2 _IPSAVGY( Splice@chr  | 5.75E-17 | 0        |
| 07Apr2011 | 10589 | 665.33  | -24.2546 | 2 _QIPQSVG chr2@1325    | 3.12E-10 | 0.00443  |
| 07Apr2011 | 13034 | 724.07  | 13.84377 | 3 K.FLIFFGGK chr3@2110  | 3.10E-10 | 0.007409 |
| 11Nov2011 | 30975 | 1000.5  | -25.5062 | 2 E.CLVVNLS` Splice@chr | 9.66E-11 | 0.002418 |
| 11Nov2011 | 31006 | 1000.5  | -25.5062 | 2 E.CLVVNLS` Splice@chr | 8.12E-11 | 0.00231  |
| 11Nov2011 | 30945 | 1000.5  | -25.5062 | 2 E.CLVVNLS` Splice@chr | 2.51E-10 | 0.006126 |
| 07Apr2011 | 4100  | 822.47  | -23.826  | 2 K.KVLLVST( chr1@1115  | 8.97E-11 | 0.002232 |
| 07Apr2011 | 2357  | 459.58  | -21.4727 | 3 K.LSFLGTG` chr5@3834  | 6.37E-10 | 0.008427 |
| 07Apr2011 | 7473  | 700.37  | 11.86921 | 2 N.EWK+14. chrX@4292   | 4.95E-10 | 0.007573 |

|           |       |         |          |                         |          |          |
|-----------|-------|---------|----------|-------------------------|----------|----------|
| 07Apr2011 | 1695  | 520.28  | 22.45061 | 4 K.MNKVTSI chr4@1457   | 7.54E-10 | 0.009526 |
| 07Apr2011 | 13852 | 896.92  | -22.6174 | 2 K.YQCDKNI chr5@1149   | 2.58E-10 | 0.003343 |
| 07Apr2011 | 10389 | 972.11  | 27.57646 | 2 R.TRRRM+ chr4@1185    | 3.14E-10 | 0.007709 |
| 07Apr2011 | 4211  | 517.96  | 18.96984 | 3 K.LICMKRS Splice@chr  | 3.06E-10 | 0.005282 |
| 11Nov2011 | 25457 | 746.62  | -22.0058 | 4 _FKSMAKI chr5@2727    | 5.13E-11 | 0.001401 |
| 07Apr2011 | 2594  | 418.24  | -4.39126 | 2 K.FLAAGDL chrX@1007   | 4.53E-10 | 0.006686 |
| 11Nov2011 | 34554 | 1157.63 | 13.15321 | 1 _NLVYNSK chr2@1346    | 8.00E-11 | 0.002201 |
| 07Apr2011 | 6144  | 843.45  | -23.256  | 2 K.FANLHFL chr1@1146   | 5.44E-10 | 0.007198 |
| 07Apr2011 | 2329  | 758.85  | 28.43075 | 2 R.YPFQCSS Splice@chr  | 4.18E-11 | 0.00146  |
| 07Apr2011 | 11982 | 779.99  | -25.1878 | 5 K.YFDILKSN chr4@1429  | 7.95E-10 | 0.009526 |
| 07Apr2011 | 10204 | 779.79  | -24.3263 | 5 K.YFDILKSN chr4@1429  | 2.07E-10 | 0.003314 |
| 11Nov2011 | 3924  | 412.23  | 25.3069  | 2 R.IASYQGG chrX@1679   | 3.14E-11 | 7.67E-04 |
| 07Apr2011 | 3587  | 451.26  | 17.14834 | 2 R.NQSAGIR chr3@8500   | 4.21E-10 | 0.005573 |
| 07Apr2011 | 10679 | 510.26  | -11.0862 | 2 R.DVDILMV Splice@chr  | 1.48E-10 | 0.002014 |
| 07Apr2011 | 10635 | 510.27  | 8.509435 | 2 R.DVDILMV Splice@chr  | 3.80E-10 | 0.007082 |
| 07Apr2011 | 12998 | 939.52  | 3.287126 | 2 _GK+14.01 Splice@chr  | 5.80E-10 | 0.009525 |
| 07Apr2011 | 2114  | 473.27  | -10.8006 | 2 _KSNGVAC chr5@1498    | 2.03E-10 | 0.004891 |
| 11Nov2011 | 32868 | 797.9   | -22.8751 | 2 R.VHIMK+1 chr1@8379   | 1.26E-10 | 0.003103 |
| 07Apr2011 | 7275  | 929.57  | 6.047272 | 1 R.KRGGGG chr2@7919    | 4.37E-10 | 0.007084 |
| 07Apr2011 | 12964 | 873.43  | 28.82459 | 3 K.NSPSRYFI chr3@6021  | 2.14E-10 | 0.003236 |
| 11Nov2011 | 5869  | 761.39  | -21.1354 | 1 _NPISAMK chrX@8094    | 4.63E-10 | 0.009219 |
| 07Apr2011 | 3858  | 593.03  | 22.95658 | 3 R.LSDFPSK chr2@1059   | 2.04E-10 | 0.002771 |
| 07Apr2011 | 10626 | 828.52  | 23.65545 | 2 R.YFLSQK+ chr2@3496   | 4.26E-10 | 0.009526 |
| 11Nov2011 | 10779 | 559.79  | 11.35993 | 2 R.DGWSIGI chr4@4253   | 3.56E-10 | 0.007737 |
| 07Apr2011 | 8860  | 474.26  | 29.21247 | 2 R.MERGGG chrX@3469    | 4.56E-10 | 0.009851 |
| 07Apr2011 | 8969  | 474.26  | 29.21247 | 2 R.MERGGG chrX@3469    | 8.88E-11 | 0.002906 |
| 11Nov2011 | 5719  | 537.79  | -24.2187 | 2 K.DQGMLN chr5@2023    | 2.88E-10 | 0.00649  |
| 07Apr2011 | 7599  | 578.62  | 2.747377 | 3 K.FM+15.9 Splice@chr  | 3.16E-10 | 0.004369 |
| 07Apr2011 | 216   | 516.31  | 24.84119 | 2 _KQMQQI chrX@5351     | 3.32E-10 | 0.006796 |
| 11Nov2011 | 10188 | 552.28  | -20.7036 | 2 K.NVHIFGN chr4@3996   | 2.94E-10 | 0.006542 |
| 07Apr2011 | 7714  | 625.32  | 17.8911  | 2 R.NVSGNEI chr5@1421   | 6.94E-11 | 8.29E-04 |
| 07Apr2011 | 8155  | 604.85  | -1.97088 | 2 R.VFRNSSL chr3@1119   | 4.51E-10 | 0.009044 |
| 11Nov2011 | 3312  | 439.74  | 18.7116  | 2 R.SIAMFGP chr2@4157   | 1.68E-11 | 4.37E-04 |
| 07Apr2011 | 6718  | 622.33  | -10.7074 | 2 K.CLK+14.0 chr5@1872  | 5.69E-10 | 0.00939  |
| 07Apr2011 | 12179 | 762.39  | -16.8991 | 4 K.MVLRSQ chrX@1119    | 4.61E-10 | 0.008493 |
| 07Apr2011 | 11754 | 886.49  | -12.7232 | 2 R.LQK+14.0 Splice@chr | 6.91E-10 | 0.009584 |
| 07Apr2011 | 2880  | 460.25  | -0.06645 | 2 K.IAECSVLK chrX@2064  | 3.20E-10 | 0.005034 |
| 07Apr2011 | 2350  | 460.25  | -0.06645 | 2 K.IAECSVLK chrX@2064  | 3.54E-10 | 0.007522 |
| 07Apr2011 | 2237  | 460.25  | -0.06645 | 2 K.IAECSVLK chrX@2064  | 1.50E-10 | 0.003378 |
| 07Apr2011 | 2354  | 460.75  | -3.71898 | 2 K.IAECSVLK chrX@2064  | 2.63E-10 | 0.006533 |
| 07Apr2011 | 2818  | 460.25  | -0.06645 | 2 K.IAECSVLK chrX@2064  | 3.75E-10 | 0.005128 |
| 07Apr2011 | 2869  | 460.25  | -0.06645 | 2 K.IAECSVLK chrX@2064  | 4.15E-10 | 0.005256 |
| 07Apr2011 | 2529  | 460.25  | -0.06645 | 2 K.IAECSVLK chrX@2064  | 3.27E-10 | 0.00514  |
| 07Apr2011 | 2659  | 460.25  | -0.06645 | 2 K.IAECSVLK chrX@2064  | 3.12E-10 | 0.004052 |
| 07Apr2011 | 13880 | 770.38  | 2.70358  | 1 R.GVHDWF chr5@1679    | 1.70E-10 | 0.001848 |
| 07Apr2011 | 9429  | 514.52  | 26.86268 | 4 K.LSCFKHG chrX@1464   | 5.32E-10 | 0.009009 |
| 07Apr2011 | 9250  | 516.31  | -23.9254 | 3 _NIIFVIFHI chr3@1246  | 3.51E-10 | 0.006285 |

|           |       |         |          |                          |          |          |
|-----------|-------|---------|----------|--------------------------|----------|----------|
| 07Apr2011 | 4175  | 423.26  | -10.6    | 3 R.VGHELLV Splice@chr   | 4.10E-10 | 0.005678 |
| 07Apr2011 | 8561  | 767.4   | -23.0949 | 2 K.QLDFLVD chr4@139     | 3.71E-10 | 0.005548 |
| 07Apr2011 | 5972  | 617.33  | -8.8687  | 2 K.VSERSDS chr5@106     | 5.32E-10 | 0.007838 |
| 07Apr2011 | 9482  | 653.9   | -11.7592 | 4 R.ISVHRLP chr5@266     | 2.53E-10 | 0.006371 |
| 11Nov2011 | 27501 | 803.41  | -28.9913 | 3 R.ATK+14.C Splice@chr  | 3.31E-10 | 0.007131 |
| 11Nov2011 | 4193  | 928.48  | 5.067247 | 1 K.FRSHPER chr5@382     | 4.94E-10 | 0.009979 |
| 07Apr2011 | 12829 | 1135.57 | -27.8346 | 1 R.TVHLVYC chr1@112     | 1.69E-10 | 0.003078 |
| 07Apr2011 | 11903 | 836.44  | -21.2595 | 2 R.QNQKQN chr2@260      | 1.56E-10 | 0.002023 |
| 07Apr2011 | 5083  | 524.81  | 21.32422 | 2 K.KLMGME chrX@196      | 3.59E-10 | 0.007527 |
| 11Nov2011 | 12921 | 625.82  | -11.1921 | 2 I.QLEDIEFIS Splice@chr | 3.64E-10 | 0.007844 |
| 11Nov2011 | 12808 | 625.82  | -11.1921 | 2 I.QLEDIEFIS Splice@chr | 4.24E-10 | 0.008643 |
| 07Apr2011 | 8750  | 958.95  | -11.8508 | 2 R.DDTRNM chr5@905      | 1.46E-10 | 0.003341 |
| 07Apr2011 | 10722 | 737.46  | -7.83572 | 2 R.IFVILSKI chr2@611    | 4.22E-10 | 0.007868 |
| 07Apr2011 | 8547  | 1160.61 | -26.0252 | 3 K.TEEQIPLT Splice@chr  | 7.22E-10 | 0.009185 |
| 07Apr2011 | 9291  | 1160.61 | -26.0252 | 3 K.TEEQIPLT Splice@chr  | 1.40E-10 | 0.002233 |
| 07Apr2011 | 10292 | 1160.61 | -26.0252 | 3 K.TEEQIPLT Splice@chr  | 2.21E-10 | 0.003071 |
| 07Apr2011 | 14010 | 701.11  | 9.68276  | 3 K.K+14.016 chr1@145    | 3.55E-10 | 0.007954 |
| 07Apr2011 | 8840  | 753.88  | -11.6739 | 2 K.ESKDQM chr2@118      | 7.64E-11 | 0.001635 |
| 11Nov2011 | 32718 | 1085.58 | -5.93882 | 2 R.CRHWWG chr4@401      | 5.17E-10 | 0.009993 |
| 07Apr2011 | 10344 | 1190.26 | 5.542839 | 3 _SECRIGEE Splice@chr   | 8.03E-10 | 0.009696 |
| 11Nov2011 | 30981 | 1256.96 | -19.1791 | 3 K.FICETESE chr4@316    | 2.03E-10 | 0.005129 |
| 11Nov2011 | 10372 | 677.34  | -8.57314 | 2 K.MQQFST chr5@208      | 8.25E-11 | 0.00231  |
| 07Apr2011 | 2684  | 441.73  | -20.3089 | 2 K.HLIGGPC chr3@100     | 1.05E-10 | 0.001552 |
| 11Nov2011 | 26903 | 787.95  | 27.74748 | 2 _KYM+15. chr5@159      | 2.54E-10 | 0.006178 |
| 07Apr2011 | 5111  | 720.37  | -17.9022 | 2 K.SNRDAT chr1@303      | 3.59E-11 | 6.98E-04 |
| 07Apr2011 | 4046  | 720.37  | -17.9022 | 2 K.SNRDAT chr1@303      | 3.61E-10 | 0.005216 |
| 07Apr2011 | 10473 | 888.47  | -7.12097 | 2 K.FK+14.01 Splice@chr  | 3.36E-10 | 0.004729 |
| 07Apr2011 | 1655  | 451.73  | -12.8086 | 2 R.QNDVGG chrX@161      | 1.41E-11 | 5.49E-04 |
| 07Apr2011 | 13906 | 866.44  | -1.12841 | 3 _WAYKVV chr5@347       | 6.67E-11 | 0.001358 |
| 07Apr2011 | 12734 | 866.44  | -1.12841 | 3 _WAYKVV chr5@347       | 3.34E-10 | 0.006777 |
| 07Apr2011 | 3442  | 898.97  | -14.1784 | 2 _IPANCRF chr2@147      | 5.75E-11 | 9.86E-04 |
| 11Nov2011 | 30122 | 1112.92 | -10.3196 | 3 _CGGKIFRI Splice@chr   | 3.29E-10 | 0.006682 |
| 07Apr2011 | 1118  | 495.27  | -27.1665 | 3 K.FLSFLLGII Splice@chr | 6.18E-10 | 0.009163 |
| 07Apr2011 | 12658 | 909.52  | -19.8615 | 2 S.RSPYLK+1 chr2@845    | 6.43E-10 | 0.009699 |
| 07Apr2011 | 7851  | 754.38  | -24.7903 | 4 K.EDWEFS Splice@chr    | 5.10E-10 | 0.009327 |
| 07Apr2011 | 13403 | 1042.55 | -9.92296 | 3 R.QEFLIK chr4@722      | 5.40E-10 | 0.007313 |
| 07Apr2011 | 14224 | 1116.22 | 16.71106 | 3 K.QAFDDAI Splice@chr   | 1.39E-10 | 0.002162 |
| 07Apr2011 | 13203 | 1116.22 | 16.71106 | 3 K.QAFDDAI Splice@chr   | 2.04E-10 | 0.003599 |
| 07Apr2011 | 12179 | 1116.22 | 16.71106 | 3 K.QAFDDAI Splice@chr   | 3.72E-10 | 0.004576 |
| 11Nov2011 | 32413 | 989.5   | -8.15037 | 3 R.LCLFTTVI chr4@109    | 1.13E-10 | 0.003048 |
| 07Apr2011 | 12012 | 925.15  | -3.41278 | 3 K.VSLNFK+ chrX@933     | 1.40E-10 | 0.00184  |
| 07Apr2011 | 12208 | 968.13  | 14.47345 | 3 _CSIRPISG Splice@chr   | 1.06E-11 | 3.93E-04 |
| 07Apr2011 | 4387  | 453.75  | -10.4478 | 2 R.LVMTMR chr5@437      | 5.25E-10 | 0.008855 |
| 07Apr2011 | 4435  | 453.75  | -10.4478 | 2 R.LVMTMR chr5@437      | 3.86E-10 | 0.006225 |
| 07Apr2011 | 3055  | 593.02  | -27.9533 | 3 R.KLRPEPV chr5@783     | 2.99E-10 | 0.004979 |
| 07Apr2011 | 13133 | 887.42  | -26.695  | 2 R.LEEFEIFS chr3@236    | 4.60E-10 | 0.00782  |
| 07Apr2011 | 10614 | 829.02  | 27.12707 | 2 K.LK+14.01 Splice@chr  | 2.12E-10 | 0.006305 |

|           |       |         |          |                         |          |          |
|-----------|-------|---------|----------|-------------------------|----------|----------|
| 11Nov2011 | 5750  | 802.41  | -4.95393 | 1 K.EPESALR. chr2@1146  | 4.37E-10 | 0.008845 |
| 07Apr2011 | 5344  | 661.85  | 5.356889 | 2 K.RK+14.01 chr2@7364  | 2.98E-10 | 0.00634  |
| 11Nov2011 | 26909 | 1385.74 | 7.1914   | 1 K.FQNFQAI chr2@2226   | 1.48E-10 | 0.003674 |
| 11Nov2011 | 26811 | 1385.74 | 7.1914   | 1 K.FQNFQAI chr2@2226   | 2.55E-10 | 0.006178 |
| 11Nov2011 | 26907 | 1384.74 | 9.615872 | 1 K.FQNFQAI chr2@2226   | 1.19E-10 | 0.003048 |
| 11Nov2011 | 25363 | 1384.74 | 9.615872 | 1 K.FQNFQAI chr2@2226   | 3.00E-10 | 0.006141 |
| 07Apr2011 | 1812  | 1047.58 | -7.64502 | 1 K.SISPQK+1 chr3@3235  | 3.67E-10 | 0.006777 |
| 07Apr2011 | 12715 | 1035.53 | -2.56663 | 2 _FHASYPG chrX@2109    | 6.02E-10 | 0.009286 |
| 07Apr2011 | 12961 | 1013.89 | -29.4055 | 3 R.KLMSLAV chr5@1141   | 6.87E-11 | 0.001456 |
| 11Nov2011 | 15717 | 691.85  | 23.12212 | 2 _M+15.99 chr5@1026    | 4.70E-10 | 0.009324 |
| 07Apr2011 | 955   | 454.26  | -14.4085 | 2 R.AVTTVAF chrX@1727   | 6.20E-11 | 0.002159 |
| 07Apr2011 | 6808  | 785.91  | 4.354662 | 2 K.KTENLAV chr5@1866   | 2.87E-10 | 0.004246 |
| 07Apr2011 | 10638 | 949.6   | -16.7688 | 2 K.MRK+14. chr5@7011   | 3.80E-11 | 0.00146  |
| 07Apr2011 | 13204 | 886.49  | 0.413573 | 2 K.PRRSM+1 chr5@2634   | 3.36E-10 | 0.007071 |
| 07Apr2011 | 13422 | 977.04  | -5.28571 | 2 K.HETFAK+ Splice@chr  | 2.38E-10 | 0.00514  |
| 07Apr2011 | 2229  | 551.76  | -27.9262 | 2 K.LCMFFEK chrX@1622   | 2.42E-10 | 0.004811 |
| 07Apr2011 | 1997  | 551.76  | -27.9262 | 2 K.LCMFFEK chrX@1622   | 1.72E-10 | 0.005006 |
| 07Apr2011 | 6482  | 571.86  | -2.35222 | 2 T.KKGDIVEI chr5@1238  | 3.71E-10 | 0.00897  |
| 11Nov2011 | 10043 | 507.78  | 21.88395 | 2 Q.DPVEDG Splice@chr   | 2.38E-10 | 0.004914 |
| 07Apr2011 | 13228 | 735.62  | -7.2924  | 4 K.MKLKKK+ chr4@1438   | 1.22E-10 | 0.002832 |
| 07Apr2011 | 1159  | 506.27  | 2.476385 | 2 R.VGDAIVA chr5@4805   | 3.96E-10 | 0.009867 |
| 11Nov2011 | 7462  | 1107.56 | -21.6943 | 1 _SSLDKES( chr5@1239   | 6.70E-11 | 0.001905 |
| 11Nov2011 | 7226  | 1106.56 | -18.6599 | 1 _SSLDKES( chr5@1239   | 3.78E-10 | 0.007466 |
| 11Nov2011 | 7219  | 1107.56 | -21.6943 | 1 _SSLDKES( chr5@1239   | 1.91E-10 | 0.004059 |
| 07Apr2011 | 13953 | 787.91  | -27.612  | 2 R.SHNHIW( chrX@4004   | 6.43E-10 | 0.009699 |
| 07Apr2011 | 10505 | 897.95  | 12.6571  | 4 R.RCVPCAC Splice@chr  | 3.46E-11 | 0.001755 |
| 07Apr2011 | 8008  | 911.02  | -22.6472 | 2 R.LKLRFQI chr5@4338   | 6.02E-11 | 0.00113  |
| 07Apr2011 | 11609 | 699.38  | -14.9273 | 4 K.NEENRSK chr5@1796   | 1.74E-11 | 1.84E-04 |
| 07Apr2011 | 668   | 574.35  | 22.67543 | 2 R.KWLKLSN Splice@chr  | 3.23E-10 | 0.008048 |
| 07Apr2011 | 10571 | 708.38  | -25.9997 | 3 K.DNLK+14 chr1@7855   | 1.19E-10 | 0.001603 |
| 07Apr2011 | 10100 | 633.9   | 27.48572 | 2 K.K+14.016 chr1@4452  | 2.54E-10 | 0.004212 |
| 07Apr2011 | 2593  | 866.5   | 17.55998 | 1 R.AHPSVSL chr1@1057   | 3.78E-10 | 0.008624 |
| 11Nov2011 | 1027  | 611.28  | -1.00013 | 2 R.ENGNVS( Splice@chr  | 3.88E-11 | 0.001133 |
| 07Apr2011 | 14059 | 1071.21 | -18.1597 | 3 R.LFEFLNS( chrX@1802  | 5.48E-10 | 0.007557 |
| 11Nov2011 | 30270 | 1272.27 | 19.16254 | 3 K.FAVADEE Splice@chr  | 2.48E-13 | 0        |
| 11Nov2011 | 30140 | 1272.28 | 27.03865 | 3 K.FAVADEE Splice@chr  | 5.45E-14 | 0        |
| 11Nov2011 | 30229 | 1272.28 | 27.03865 | 3 K.FAVADEE Splice@chr  | 8.08E-14 | 0        |
| 07Apr2011 | 10248 | 949.6   | -15.8032 | 2 K.KLKSGK( chr2@1497   | 1.17E-10 | 0.00263  |
| 07Apr2011 | 10578 | 706.95  | -20.0581 | 2 R.KIQILSLK( chrX@2247 | 2.71E-12 | 0        |
| 07Apr2011 | 7802  | 811.44  | 3.84092  | 2 K.M+15.99 chr2@3225   | 6.32E-10 | 0.009679 |
| 07Apr2011 | 2663  | 704.33  | -22.8229 | 2 K.QSYHIGH chr4@3844   | 6.13E-10 | 0.009284 |
| 07Apr2011 | 2765  | 704.33  | -22.8229 | 2 K.QSYHIGH chr4@3844   | 2.47E-10 | 0.003202 |
| 07Apr2011 | 15620 | 1048.21 | -7.90898 | 3 R.TRFSNLG chr3@5545   | 2.75E-10 | 0.006024 |
| 07Apr2011 | 14364 | 1110.57 | -11.6616 | 2 R.FWK+14. chr1@1695   | 1.12E-10 | 0.001803 |
| 07Apr2011 | 11069 | 832.44  | 18.62222 | 2 T.NYTILGK1 chr1@1344  | 4.56E-10 | 0.006656 |
| 11Nov2011 | 8620  | 496.28  | -16.7598 | 2 _VIHTGSH chr1@3537    | 6.35E-11 | 0.00179  |
| 07Apr2011 | 6961  | 604.33  | 18.58137 | 2 _KDK+14.( chrX@1077   | 7.96E-11 | 0.001177 |

|           |       |         |          |                         |          |          |
|-----------|-------|---------|----------|-------------------------|----------|----------|
| 07Apr2011 | 7011  | 604.33  | 18.58137 | 2 _ .KDK+14.( chrX@107  | 5.30E-10 | 0.007142 |
| 07Apr2011 | 13255 | 828.39  | -8.00743 | 2 K.PNLK+14 chr2@386    | 3.29E-10 | 0.005034 |
| 07Apr2011 | 8262  | 568.97  | -29.0859 | 3 R.QFGPTV\ chr3@182    | 3.10E-10 | 0.004573 |
| 11Nov2011 | 363   | 722.35  | 3.723    | 1 R.FQGGGEI chr1@259    | 4.48E-10 | 0.008911 |
| 07Apr2011 | 9416  | 690.35  | -29.1932 | 2 _ .QKTSNSS chr2@126   | 2.84E-10 | 0.004359 |
| 07Apr2011 | 9450  | 866.04  | 4.374631 | 2 K.KK+14.01 chrX@684   | 1.22E-10 | 0.001272 |
| 07Apr2011 | 13686 | 1078.55 | 17.3708  | 3 _ .FWSLMN Splice@chr  | 6.52E-10 | 0.009435 |
| 07Apr2011 | 1452  | 488.28  | 18.24649 | 2 K.INAEFVG chr4@451    | 4.18E-10 | 0.0059   |
| 07Apr2011 | 1649  | 515.29  | 2.729654 | 2 K.ALQKGDf chrX@631    | 3.79E-10 | 0.00552  |
| 07Apr2011 | 1508  | 515.29  | 2.729654 | 2 K.ALQKGDf chrX@631    | 3.71E-10 | 0.006777 |
| 07Apr2011 | 1334  | 515.29  | 2.729654 | 2 K.ALQKGDf chrX@631    | 6.65E-10 | 0.009414 |
| 07Apr2011 | 3390  | 545.79  | -23.6028 | 2 K.LDNKFEV chr4@140    | 4.78E-10 | 0.006884 |
| 07Apr2011 | 14151 | 1166.28 | 25.84071 | 3 R.TFWNFLE chr3@115    | 3.72E-10 | 0.006618 |
| 07Apr2011 | 13574 | 978.95  | 18.3078  | 3 S.RKKM+1 Splice@chr   | 2.57E-10 | 0.005336 |
| 11Nov2011 | 1275  | 490.72  | 21.9362  | 2 K.DEASCKD chr5@476    | 3.39E-10 | 0.006862 |
| 07Apr2011 | 6400  | 595.29  | -9.60904 | 2 _ .HFEIFENF chr2@549  | 1.99E-10 | 0.002779 |
| 07Apr2011 | 10660 | 588.64  | -21.2338 | 3 K.NYDQCAI chrX@118    | 1.61E-11 | 4.80E-04 |
| 07Apr2011 | 2460  | 680.83  | 10.05558 | 2 K.ENSPTS\ chr3@120    | 2.57E-10 | 0.003917 |
| 07Apr2011 | 7669  | 833.42  | 6.892432 | 2 _ .IDM+15.5 chrX@323  | 3.72E-10 | 0.006086 |
| 07Apr2011 | 13941 | 1000.53 | 21.51886 | 1 K.TFLNYWF chr5@203    | 3.99E-10 | 0.00544  |
| 07Apr2011 | 4862  | 720.41  | -7.97504 | 2 K.RHKVWS chrX@313     | 3.42E-10 | 0.006149 |
| 11Nov2011 | 23062 | 969.01  | -11.2595 | 2 Y.QRHVFNI Splice@chr  | 4.26E-10 | 0.00837  |
| 07Apr2011 | 11555 | 838.52  | -18.2917 | 2 R.WK+14.0 chr4@162    | 2.56E-10 | 0.005403 |
| 07Apr2011 | 7746  | 1166.59 | -25.658  | 2 R.M+15.99 chr5@128    | 1.82E-10 | 0.005213 |
| 07Apr2011 | 10432 | 806.93  | 16.4344  | 2 K.EYK+14.0 chr1@120   | 5.38E-10 | 0.007313 |
| 07Apr2011 | 7101  | 815.97  | -7.67991 | 2 R.TYAKNGk Splice@chr  | 4.11E-12 | 0        |
| 07Apr2011 | 13914 | 727.7   | -23.1808 | 3 F.NSVSW\ Splice@chr   | 3.10E-10 | 0.004052 |
| 07Apr2011 | 6837  | 643.37  | -15.2409 | 3 R.VAIVCSK\ Splice@chr | 2.88E-10 | 0.005683 |
| 11Nov2011 | 20812 | 774.96  | 16.29715 | 2 E.DILFVINK Splice@chr | 3.93E-11 | 0.001133 |
| 07Apr2011 | 1077  | 581.29  | -28.9242 | 2 R.LLHAFFEI Splice@chr | 3.59E-11 | 0.00146  |
| 07Apr2011 | 801   | 581.29  | -28.9242 | 2 R.LLHAFFEI Splice@chr | 5.93E-10 | 0.0059   |
| 07Apr2011 | 823   | 581.29  | -28.9242 | 2 R.LLHAFFEI Splice@chr | 5.47E-11 | 0.001456 |
| 07Apr2011 | 1094  | 581.29  | -28.9242 | 2 R.LLHAFFEI Splice@chr | 6.79E-11 | 0.001286 |
| 07Apr2011 | 14332 | 1163.11 | 14.31937 | 2 R.CNRFYID\ Splice@chr | 4.62E-10 | 0.006833 |
| 07Apr2011 | 10055 | 973.52  | -25.1742 | 3 V.ILM+15.9 chr4@982   | 4.96E-10 | 0.006673 |
| 07Apr2011 | 12061 | 916.95  | -8.99584 | 2 K.QYFFLIQ\ chr2@709   | 3.95E-10 | 0.00552  |
| 07Apr2011 | 9248  | 638.9   | 11.00361 | 2 K.FVKVK+1 Splice@chr  | 3.97E-10 | 0.009275 |
| 07Apr2011 | 2940  | 545.27  | -3.7007  | 2 K.LVSDNM- chr1@279    | 7.39E-13 | 0        |
| 07Apr2011 | 13631 | 879.42  | -20.7751 | 2 K.NVDFME chr1@190     | 2.72E-10 | 0.005498 |
| 07Apr2011 | 12720 | 1195.63 | -7.25495 | 2 R.CININKFS chr5@741   | 6.83E-10 | 0.009979 |
| 07Apr2011 | 2432  | 442.92  | -17.3102 | 3 K.ILSKILDF\ chrX@175  | 2.65E-10 | 0.002779 |
| 07Apr2011 | 15372 | 966.61  | 15.11326 | 3 _ .NLLKILVK chr3@212  | 3.29E-10 | 0.006922 |
| 07Apr2011 | 13664 | 915.5   | -8.3427  | 2 R.RWMRRI Splice@chr   | 5.41E-10 | 0.008934 |
| 11Nov2011 | 16610 | 833.42  | -4.62234 | 1 K.HEVTVFT chr4@131    | 1.33E-10 | 0.003389 |
| 07Apr2011 | 14958 | 811.77  | -25.1935 | 3 K.YGKKVFS chr5@179    | 3.32E-10 | 0.005252 |
| 11Nov2011 | 3742  | 659.42  | 15.29582 | 2 _ .ELVFRRKI chr2@764  | 5.19E-10 | 0.009993 |
| 07Apr2011 | 1379  | 529.31  | 23.30415 | 2 K.FLPAAGV chr2@108    | 6.77E-11 | 0.001456 |

|           |       |         |          |                         |          |          |
|-----------|-------|---------|----------|-------------------------|----------|----------|
| 07Apr2011 | 4577  | 601.4   | 8.090488 | 2 R.KLKGKSEI Splice@chr | 6.53E-10 | 0.008666 |
| 11Nov2011 | 5759  | 523.78  | 3.736106 | 2 R.EASSLPS\ Splice@chr | 1.15E-11 | 3.94E-04 |
| 07Apr2011 | 6498  | 700.93  | 23.34555 | 2 K.K+14.016 chr4@7445  | 1.53E-10 | 0.003341 |
| 07Apr2011 | 2589  | 607.31  | -26.6462 | 2 V.EVHVLLC Splice@chr  | 1.94E-10 | 0.004349 |
| 11Nov2011 | 22001 | 972.03  | -8.64607 | 2 R.KKECGDK chr3@1197   | 1.50E-10 | 0.003732 |
| 11Nov2011 | 290   | 848.41  | 2.093776 | 1 R.EEAELEK. chr2@4805  | 2.33E-10 | 0.005907 |
| 07Apr2011 | 2290  | 658.38  | 24.79081 | 2 R.WEDLPIN Splice@chr  | 1.39E-10 | 0.002233 |
| 07Apr2011 | 5252  | 717.93  | -1.61756 | 2 _EELRLQLI chr4@1110   | 5.82E-10 | 0.008154 |
| 07Apr2011 | 5980  | 717.93  | -1.61756 | 2 _EELRLQLI chr4@1110   | 4.43E-10 | 0.006396 |
| 07Apr2011 | 5444  | 717.92  | -15.5797 | 2 _EELRLQLI chr4@1110   | 1.50E-10 | 0.002014 |
| 07Apr2011 | 545   | 471.95  | 14.05194 | 3 K.NIELKTD\ chr5@5084  | 1.34E-10 | 0.002986 |
| 07Apr2011 | 6430  | 700.93  | 9.295377 | 2 R.RLRSAGA chr5@1146   | 1.60E-11 | 3.93E-04 |
| 07Apr2011 | 5550  | 731.9   | -23.7991 | 2 P.NDNKSVI chrX@6003   | 4.39E-10 | 0.009164 |
| 07Apr2011 | 6758  | 712.33  | -26.4874 | 2 N.NAVDGE Splice@chr   | 6.45E-12 | 2.04E-04 |
| 07Apr2011 | 12701 | 606.63  | -4.87256 | 3 R.ECNEKIRI chr5@1548  | 4.88E-10 | 0.009617 |
| 07Apr2011 | 10199 | 623.34  | -22.1315 | 2 K.QNGLESS chr1@6155   | 4.66E-10 | 0.00782  |
| 07Apr2011 | 9073  | 915.48  | 28.09984 | 2 _HILCEEPA chr5@1219   | 3.13E-10 | 0.006518 |
| 07Apr2011 | 8759  | 774.82  | 4.867067 | 3 R.MVFLILL chr3@5933   | 2.11E-10 | 0.004577 |
| 07Apr2011 | 11640 | 774.82  | 4.867067 | 3 R.MVFLILL chr3@5933   | 8.53E-11 | 0.001898 |
| 11Nov2011 | 19143 | 623.03  | -18.2266 | 3 P.RNWGKC chrX@1446    | 4.21E-10 | 0.008643 |
| 11Nov2011 | 1192  | 552.3   | 10.18569 | 2 R.TQNATAI Splice@chr  | 1.25E-10 | 0.00321  |
| 07Apr2011 | 9545  | 604.31  | 0.303505 | 2 K.RFGMGG chr5@1449    | 1.17E-10 | 0.002612 |
| 07Apr2011 | 7707  | 790.93  | -24.8795 | 2 M.FFFTLKK chr4@6564   | 2.87E-10 | 0.004345 |
| 07Apr2011 | 11505 | 1149.6  | -24.7288 | 1 R.IETK+14.( chr1@6638 | 2.72E-11 | 5.15E-04 |
| 07Apr2011 | 10351 | 570.78  | -14.6755 | 2 G.QNDVNL Splice@chr   | 8.10E-10 | 0.009696 |
| 07Apr2011 | 13158 | 930.15  | -20.4948 | 3 K.NNFELLQ chr4@1472   | 3.48E-11 | 6.03E-04 |
| 07Apr2011 | 1926  | 494.28  | 3.464599 | 2 K.NKNHHLI chr3@8732   | 2.19E-10 | 0.005447 |
| 11Nov2011 | 905   | 403.23  | 10.8661  | 2 R.AMVASG chr5@1721    | 2.15E-10 | 0.005352 |
| 07Apr2011 | 11153 | 1077.07 | -10.2096 | 2 _KK+14.01 chr3@1962   | 2.37E-10 | 0.005528 |
| 07Apr2011 | 11682 | 880.99  | -21.7091 | 2 V.VKK+14.( chr5@1926  | 3.45E-10 | 0.00806  |
| 07Apr2011 | 11002 | 948.85  | -2.40403 | 3 K.PENLK+1. chrX@1736  | 3.80E-10 | 0.006447 |
| 07Apr2011 | 3736  | 604.83  | -0.40433 | 2 K.SISFSPD Splice@chr  | 3.88E-11 | 7.77E-04 |
| 07Apr2011 | 13021 | 938.99  | -3.25352 | 2 K.FSNFQRA chr2@1273   | 1.90E-10 | 0.002387 |
| 07Apr2011 | 6749  | 456.22  | 8.365482 | 3 K.NLMPGIN chr5@1605   | 4.19E-11 | 8.01E-04 |
| 07Apr2011 | 16190 | 913.98  | -12.6351 | 2 R.IWNPFLP Splice@chr  | 2.37E-10 | 0.00514  |
| 07Apr2011 | 15645 | 1016.54 | -21.9562 | 1 R.TFLHRWF chr1@5741   | 2.33E-10 | 0.003202 |
| 07Apr2011 | 7922  | 583.33  | -27.8796 | 2 K.KFTGHPII chr5@2845  | 6.14E-10 | 0.009123 |
| 07Apr2011 | 11250 | 624.86  | -22.0775 | 2 R.VQKK+14 chr4@1736   | 2.83E-10 | 0.00618  |
| 11Nov2011 | 12862 | 625.82  | -20.2839 | 2 R.K+14.016 chrX@1356  | 4.55E-10 | 0.009167 |
| 07Apr2011 | 13750 | 1119.91 | -20.801  | 3 I.DRIMRM+ chr1@2876   | 6.07E-10 | 0.008485 |
| 07Apr2011 | 13475 | 798.65  | 11.96074 | 4 _QK+14.01 Splice@chr  | 4.92E-10 | 0.00757  |
| 07Apr2011 | 11169 | 939.59  | -14.7356 | 2 K.KKTRKNF chr2@1109   | 1.47E-10 | 0.004151 |
| 07Apr2011 | 4795  | 640.83  | -13.7365 | 4 K.SIQARKRI chr4@9242  | 1.01E-10 | 0.001577 |
| 07Apr2011 | 13470 | 879.92  | 8.680573 | 2 K.GKYCRTG chr3@1142   | 3.63E-11 | 5.62E-04 |
| 07Apr2011 | 5230  | 638.36  | 10.82141 | 2 K.CSINDLVI Splice@chr | 6.15E-10 | 0.009123 |
| 07Apr2011 | 13026 | 949.59  | 9.947571 | 2 R.NHQK+14 chr5@1508   | 1.79E-10 | 0.003793 |
| 07Apr2011 | 7498  | 790.93  | -27.3292 | 2 _KINTYTEF chr3@9079   | 6.14E-10 | 0.009442 |

|           |       |         |          |                         |          |          |
|-----------|-------|---------|----------|-------------------------|----------|----------|
| 07Apr2011 | 3250  | 566.81  | 0.647242 | 2 I.RIPLDYAE chr5@2047  | 2.63E-10 | 0.003644 |
| 07Apr2011 | 5255  | 604.3   | -19.811  | 4 K.HPLSDSN Splice@chr  | 5.31E-10 | 0.0084   |
| 07Apr2011 | 7041  | 724.07  | 27.57536 | 3 K.M+15.99 chr5@5637   | 2.71E-10 | 0.007709 |
| 07Apr2011 | 11982 | 870.96  | -20.5318 | 2 K.FK+14.01 chr2@2356  | 6.49E-10 | 0.009971 |
| 07Apr2011 | 14039 | 1160.58 | -9.47438 | 3 R.DFRSTEL Splice@chr  | 5.80E-10 | 0.009525 |
| 11Nov2011 | 12864 | 746.36  | -23.1469 | 2 R.SYHYVAF Splice@chr  | 4.92E-10 | 0.009748 |
| 11Nov2011 | 12806 | 746.36  | -23.1469 | 2 R.SYHYVAF Splice@chr  | 8.98E-11 | 0.002364 |
| 07Apr2011 | 1079  | 477.72  | -15.2358 | 2 R.FICGNSTI Splice@chr | 5.02E-10 | 0.006833 |
| 07Apr2011 | 11590 | 987.5   | -5.85708 | 3 K.KYLFLDNI chr4@1288  | 3.14E-10 | 0.00633  |
| 07Apr2011 | 10782 | 513.79  | 11.85707 | 2 R.LM+15.9 Splice@chr  | 1.08E-10 | 0.002937 |
| 07Apr2011 | 3253  | 979.49  | 11.24178 | 1 _NLQNGN chr2@1080     | 2.35E-10 | 0.005817 |
| 07Apr2011 | 7356  | 550.35  | 3.777615 | 2 K.LLNPVVL chr4@1631   | 3.89E-10 | 0.008115 |
| 07Apr2011 | 12577 | 941     | -13.5705 | 2 _FPK+14.0 chr3@5665   | 3.38E-10 | 0.007062 |
| 11Nov2011 | 28703 | 876.98  | -22.6214 | 2 V.FPCK+14 chrX@2447   | 3.82E-10 | 0.008166 |
| 07Apr2011 | 5819  | 499.01  | -13.5791 | 4 L.VAVVEQ chr3@1191    | 2.05E-10 | 0.003164 |
| 07Apr2011 | 5783  | 638.84  | -15.3687 | 2 _NFLNK+1 chr2@1147    | 4.58E-10 | 0.007084 |
| 07Apr2011 | 9379  | 880.42  | -19.4329 | 2 _EYLLCEPF Splice@chr  | 3.18E-10 | 0.006494 |
| 07Apr2011 | 2777  | 676.37  | -22.5026 | 2 K.KFIITTFEF chr2@2335 | 5.26E-10 | 0.009729 |
| 11Nov2011 | 21322 | 732.89  | -14.9274 | 4 K.K+14.016 chrX@1275  | 1.81E-10 | 0.004755 |
| 07Apr2011 | 8989  | 685.37  | 1.426969 | 2 K.VFRYGM chrX@1637    | 2.11E-10 | 0.003019 |
| 07Apr2011 | 10420 | 1015.63 | -14.9025 | 3 K.PKPELKPI chr1@7415  | 2.40E-10 | 0.004999 |
| 07Apr2011 | 11034 | 680.9   | 16.03794 | 2 A.LVTL SAG Splice@chr | 1.46E-10 | 0.003134 |
| 07Apr2011 | 13691 | 661.34  | 11.18427 | 2 K.KMVEAH chr1@1457    | 3.09E-10 | 0.004201 |
| 07Apr2011 | 12634 | 1031.02 | -27.5956 | 2 K.FQFYEKSI chr1@4342  | 6.54E-11 | 9.60E-04 |
| 07Apr2011 | 3051  | 422.24  | -14.1272 | 2 R.KVHGFA chr4@4031    | 3.68E-11 | 0        |
| 07Apr2011 | 974   | 514.3   | -22.3544 | 2 R.PLESSILLI chr4@4365 | 1.61E-10 | 0.003378 |
| 07Apr2011 | 14406 | 956.58  | -15.4071 | 1 K.RGIRQIGI chr2@3175  | 3.95E-10 | 0.006225 |
| 07Apr2011 | 11395 | 847.4   | -19.9747 | 2 _VFCSSQK chr5@4901    | 6.03E-10 | 0.00915  |
| 07Apr2011 | 3511  | 565.29  | -27.0912 | 3 _MTFSDA Splice@chr    | 6.02E-10 | 0.009558 |
| 11Nov2011 | 29855 | 1074.57 | 17.09359 | 2 K.YFKINILEI chr2@1186 | 1.94E-10 | 0.005032 |
| 07Apr2011 | 3898  | 544.28  | 1.632521 | 2 K.KDLDSFF Splice@chr  | 4.89E-10 | 0.007272 |
| 07Apr2011 | 6099  | 575.85  | -12.1041 | 2 K.IRSRPALL Splice@chr | 3.13E-10 | 0.0092   |
| 07Apr2011 | 11939 | 911.24  | -17.6127 | 3 _K+14.016 chr2@2787   | 3.61E-10 | 0.008374 |
| 07Apr2011 | 10754 | 690.03  | -14.8816 | 3 _ISIITFCWI Splice@chr | 5.43E-10 | 0.007417 |
| 07Apr2011 | 9503  | 854.47  | -3.18301 | 2 K.QK+14.0 Splice@chr  | 1.74E-10 | 0.004497 |
| 11Nov2011 | 28542 | 1286.62 | 25.67205 | 2 _SGCRLLF chrX@6795    | 4.98E-10 | 0.009851 |
| 07Apr2011 | 13351 | 768.39  | -29.4808 | 3 R.SEELVLKI Splice@chr | 3.62E-10 | 0.005537 |
| 11Nov2011 | 23769 | 1366.16 | -23.681  | 2 K.TAQTFIT Splice@chr  | 4.20E-10 | 0.008643 |
| 07Apr2011 | 2577  | 524.28  | -11.2752 | 3 R.APF SHPL chrX@6165  | 5.23E-10 | 0.007999 |
| 07Apr2011 | 5644  | 575.79  | -14.6538 | 2 K.ISSIGSSA chrX@1226  | 3.25E-10 | 0.006922 |
| 07Apr2011 | 4552  | 826.65  | 11.2592  | 4 R.FKYLKKN chr5@4790   | 4.08E-10 | 0.006509 |
| 07Apr2011 | 11515 | 922.49  | -5.89496 | 2 R.FRTK+14 chr1@1232   | 2.96E-10 | 0.004246 |
| 07Apr2011 | 12438 | 930.16  | -8.84605 | 3 E.SEYSTFV chr4@3265   | 4.15E-10 | 0.009157 |
| 07Apr2011 | 8337  | 901.51  | -1.83003 | 2 R.KK+14.01 chr2@1330  | 1.51E-10 | 0.004178 |
| 07Apr2011 | 14992 | 904.57  | 16.61745 | 2 K.NIYIYTIR Splice@chr | 3.31E-10 | 0.006922 |
| 07Apr2011 | 6951  | 733.39  | -9.21359 | 2 K.NKQTWL Splice@chr   | 2.66E-10 | 0.003762 |
| 07Apr2011 | 2993  | 597.3   | -27.3429 | 3 K.HNQPHP chr4@6488    | 3.08E-10 | 0.0092   |

|           |       |         |          |                         |          |          |
|-----------|-------|---------|----------|-------------------------|----------|----------|
| 07Apr2011 | 6026  | 428.2   | 5.715039 | 3 K.TSKLSSCI chr3@1332  | 3.25E-10 | 0.008048 |
| 11Nov2011 | 25029 | 1216.58 | -19.8654 | 2 L.RNTRNDI chr4@1012   | 1.74E-10 | 0.004528 |
| 11Nov2011 | 23926 | 1216.58 | -19.8654 | 2 L.RNTRNDI chr4@1012   | 4.26E-10 | 0.00837  |
| 07Apr2011 | 8851  | 864.12  | -1.86206 | 3 K.IVK+14.0 chr2@1029  | 3.45E-10 | 0.007246 |
| 07Apr2011 | 11929 | 981.97  | -8.89734 | 4 K.LVELAGD Splice@chr  | 7.80E-10 | 0.009526 |
| 07Apr2011 | 9865  | 641.36  | 4.696963 | 4 A.EITEMLPi Splice@chr | 1.14E-11 | 0        |
| 07Apr2011 | 12128 | 641.36  | 4.696963 | 4 A.EITEMLPi Splice@chr | 2.52E-11 | 0.001526 |
| 07Apr2011 | 1952  | 419.22  | -4.3053  | 2 K.FVATTVA chr5@5621   | 2.93E-10 | 0.00723  |
| 07Apr2011 | 2580  | 699.45  | -2.44685 | 1 K.VAVVGVI chrX@1697   | 4.41E-10 | 0.006177 |
| 07Apr2011 | 13522 | 871.46  | -29.3693 | 4 _STRTHGK chr1@1351    | 6.99E-11 | 0.002721 |
| 07Apr2011 | 10274 | 805.5   | -19.7742 | 2 K.TLVK+14. chr4@1718  | 1.43E-10 | 0.004839 |
| 11Nov2011 | 12784 | 533.82  | -1.88988 | 2 K.NTVLKYT Splice@chr  | 9.03E-11 | 0.002364 |
| 11Nov2011 | 12467 | 533.83  | 16.91445 | 2 K.NTVLKYT Splice@chr  | 2.11E-10 | 0.004491 |
| 07Apr2011 | 15117 | 974.49  | -21.7557 | 4 K.KCHQRTI chr5@2608   | 3.45E-10 | 0.004494 |
| 07Apr2011 | 11623 | 665.37  | -26.6417 | 2 Q.INNK+14 Splice@chr  | 5.05E-10 | 0.009979 |
| 11Nov2011 | 26144 | 665.37  | -26.6417 | 2 Q.INNK+14 Splice@chr  | 4.44E-10 | 0.008898 |
| 11Nov2011 | 7346  | 831.49  | -4.77706 | 1 _SIVGNLTi Splice@chr  | 2.99E-10 | 0.006653 |
| 07Apr2011 | 13202 | 1182.59 | -18.9055 | 2 R.ASAEMFi chr4@9859   | 1.90E-11 | 3.73E-04 |
| 07Apr2011 | 5795  | 473.31  | 25.41569 | 3 K.LFNDSK+ Splice@chr  | 3.87E-10 | 0.008197 |
| 07Apr2011 | 1327  | 408.74  | 12.49963 | 4 K.KVDLPNL chr1@9576   | 2.54E-10 | 0.004039 |
| 07Apr2011 | 1742  | 408.74  | 12.49963 | 4 K.KVDLPNL chr1@9576   | 1.26E-10 | 0.002599 |
| 07Apr2011 | 1509  | 408.74  | 12.49963 | 4 K.KVDLPNL chr1@9576   | 2.79E-11 | 0        |
| 07Apr2011 | 1647  | 408.74  | 12.49963 | 4 K.KVDLPNL chr1@9576   | 2.71E-10 | 0.007094 |
| 07Apr2011 | 2399  | 408.74  | 12.49963 | 4 K.KVDLPNL chr1@9576   | 2.17E-11 | 5.02E-04 |
| 11Nov2011 | 1158  | 503.26  | 2.921613 | 2 K.KNGGEM chr4@8235    | 1.31E-10 | 0.003219 |
| 07Apr2011 | 5569  | 525.8   | 25.12218 | 2 R.PYKLCELI Splice@chr | 2.01E-10 | 0.003428 |
| 11Nov2011 | 30444 | 955.86  | 18.18234 | 3 _FPHTRSSI chr2@1245   | 3.11E-10 | 0.006869 |
| 11Nov2011 | 19956 | 1050.03 | 14.69945 | 2 E.ILMDDTV Splice@chr  | 2.72E-10 | 0.005463 |
| 07Apr2011 | 1935  | 401.21  | -28.2355 | 3 F.GK+14.01 Splice@chr | 2.67E-10 | 0.004063 |
| 07Apr2011 | 14045 | 800.74  | -28.681  | 3 K.FINLEKQ( chr2@7929  | 3.60E-10 | 0.00501  |
| 07Apr2011 | 12754 | 800.74  | -28.681  | 3 K.FINLEK+1 chr2@7929  | 3.52E-10 | 0.008374 |
| 11Nov2011 | 18533 | 1260.65 | 3.347732 | 1 R.ITYEYTW Splice@chr  | 4.21E-10 | 0.008643 |
| 11Nov2011 | 17667 | 1260.65 | 3.347732 | 1 R.ITYEYTW Splice@chr  | 3.58E-10 | 0.007222 |
| 07Apr2011 | 4832  | 882.47  | 4.500821 | 2 K.EK+14.01 chr4@5834  | 9.80E-11 | 0.001847 |
| 07Apr2011 | 11398 | 746.12  | 14.96319 | 3 _NYTLLK+1 chrX@1062   | 2.87E-10 | 0.00723  |
| 07Apr2011 | 11478 | 746.12  | 14.96319 | 3 _NYTLLK+1 chrX@1062   | 5.84E-11 | 0.002341 |
| 07Apr2011 | 11371 | 746.11  | 1.638306 | 3 _NYTLLK+1 chrX@1062   | 1.39E-10 | 0.004643 |
| 07Apr2011 | 12874 | 746.11  | 1.638306 | 3 _NYTLLK+1 chrX@1062   | 7.73E-11 | 0.002643 |
| 07Apr2011 | 4909  | 1074.56 | 19.71032 | 2 M.VRKATG chr2@8197    | 8.90E-11 | 0.0013   |
| 07Apr2011 | 4860  | 1074.56 | 19.71032 | 2 M.VRKATG chr2@8197    | 4.19E-12 | 0        |
| 07Apr2011 | 5071  | 1074.56 | 19.71032 | 2 M.VRKATG chr2@8197    | 7.92E-11 | 0.001239 |
| 07Apr2011 | 5206  | 1074.56 | 19.71032 | 2 M.VRKATG chr2@8197    | 7.11E-11 | 8.78E-04 |
| 07Apr2011 | 4942  | 1074.56 | 19.71032 | 2 M.VRKATG chr2@8197    | 8.36E-11 | 0.001272 |
| 07Apr2011 | 4997  | 1074.56 | 19.71032 | 2 M.VRKATG chr2@8197    | 5.21E-11 | 7.47E-04 |
| 07Apr2011 | 2822  | 451.73  | -14.3269 | 4 K.FPKPAAA chr1@6378   | 6.22E-10 | 0.009552 |
| 07Apr2011 | 4943  | 679.84  | -14.2059 | 2 K.KVDEENV chr1@1255   | 6.03E-10 | 0.00996  |
| 07Apr2011 | 2304  | 487.79  | -16.8013 | 2 _TVISNTVI chr4@1361   | 4.34E-10 | 0.00968  |

|           |       |         |          |                         |          |          |
|-----------|-------|---------|----------|-------------------------|----------|----------|
| 07Apr2011 | 7541  | 601.31  | -2.21144 | 4 R.NLNIFQF chr4@6592   | 9.20E-11 | 0.001803 |
| 07Apr2011 | 309   | 860.46  | -18.677  | 2 K.KISKKFQI chr4@1029  | 1.91E-10 | 0.005047 |
| 07Apr2011 | 289   | 860.46  | -18.677  | 2 K.KISKKFQI chr4@1029  | 4.69E-10 | 0.006788 |
| 11Nov2011 | 17162 | 599.34  | -5.64446 | 3 _..INKFLIFK chr4@1511 | 1.16E-10 | 0.003048 |
| 11Nov2011 | 15046 | 599.34  | -5.64446 | 3 _..INKFLIFK chr4@1511 | 9.38E-11 | 0.002311 |
| 07Apr2011 | 10168 | 721.73  | 11.32609 | 3 R.LSSIDILM chr2@1105  | 3.94E-10 | 0.005765 |
| 07Apr2011 | 10522 | 1000.63 | 27.84333 | 2 R.EVFRRRR chr5@7067   | 3.56E-10 | 0.008491 |
| 07Apr2011 | 6525  | 500.78  | -26.867  | 2 K.EGERVLIC Splice@chr | 3.47E-10 | 0.00519  |
| 07Apr2011 | 7373  | 500.78  | -26.867  | 2 K.EGERVLIC Splice@chr | 2.54E-10 | 0.003343 |
| 07Apr2011 | 6268  | 1055.82 | 12.9616  | 3 E.GGDWTH Splice@chr   | 5.23E-11 | 5.31E-04 |
| 07Apr2011 | 9834  | 821.46  | -22.8877 | 2 _..KHFK+14 chr4@9653  | 4.29E-10 | 0.005523 |
| 11Nov2011 | 33743 | 1277.17 | 4.878389 | 2 R.DGSWWIL Splice@chr  | 1.24E-12 | 1.51E-04 |
| 11Nov2011 | 33729 | 1277.67 | 3.563978 | 2 R.DGSWWIL Splice@chr  | 1.98E-15 | 0        |
| 11Nov2011 | 33773 | 1277.16 | -2.9653  | 2 R.DGSWWIL Splice@chr  | 2.73E-12 | 2.18E-04 |
| 11Nov2011 | 33769 | 1277.67 | 3.563978 | 2 R.DGSWWIL Splice@chr  | 2.19E-14 | 0        |
| 07Apr2011 | 11133 | 1114.25 | -26.1588 | 3 K.RGESVFF chr5@5865   | 4.10E-10 | 0.008893 |
| 07Apr2011 | 15930 | 1081.34 | 18.22992 | 3 _..FLVWIFF chr3@3583  | 2.09E-10 | 0.004474 |
| 07Apr2011 | 1341  | 436.76  | 14.70741 | 2 R.FKHALEK Splice@chr  | 8.42E-10 | 0.008608 |
| 11Nov2011 | 220   | 892.42  | 18.57908 | 1 _..WENEW chrX@1302    | 4.39E-10 | 0.008663 |
| 07Apr2011 | 16386 | 967.28  | 27.88039 | 4 K.WENEELI chr2@1317   | 2.78E-10 | 0.005952 |
| 07Apr2011 | 8789  | 767.41  | -14.8922 | 2 K.SGSRTQV Splice@chr  | 3.30E-10 | 0.005005 |
| 07Apr2011 | 7197  | 591.35  | 2.274573 | 2 K.ANVLVN chr5@4320    | 1.17E-12 | 0        |
| 07Apr2011 | 7476  | 591.35  | 2.274573 | 2 K.ANVLVN chr5@4320    | 1.98E-13 | 0        |
| 11Nov2011 | 31015 | 1244.68 | 26.67253 | 1 K.RYYIASQ chrX@6484   | 2.77E-11 | 5.79E-04 |
| 07Apr2011 | 3301  | 898.97  | -15.7426 | 2 K.KICFTKIF chr3@1045  | 2.47E-10 | 0.00355  |
| 07Apr2011 | 14005 | 1028.61 | 15.56192 | 2 _..WWSLWI chr5@9905   | 2.84E-11 | 5.58E-04 |
| 07Apr2011 | 13026 | 1069.86 | 22.64027 | 3 _..YKVVQND chr5@1071  | 4.57E-10 | 0.006643 |
| 11Nov2011 | 22652 | 853.45  | -23.3178 | 2 K.NFKINSKI chr4@5819  | 3.93E-10 | 0.007826 |
| 07Apr2011 | 10803 | 735.63  | -20.9223 | 4 K.LKK+14.0 chr5@6495  | 8.48E-11 | 0.001435 |
| 07Apr2011 | 4838  | 498.58  | 9.813371 | 3 K.DDQHHG chr1@1278    | 3.34E-11 | 7.77E-04 |
| 07Apr2011 | 12187 | 1012.03 | -16.3972 | 2 _..HCRRVPF chr3@8325  | 7.75E-11 | 0.001435 |
| 07Apr2011 | 1965  | 418.24  | -21.9662 | 2 R.KMSAAA chr5@1783    | 1.49E-11 | 3.93E-04 |
| 07Apr2011 | 7949  | 522.29  | 16.44335 | 3 _..AIFEQM+ chrX@4380  | 1.40E-11 | 2.42E-04 |
| 07Apr2011 | 10904 | 844.69  | -4.34061 | 4 R.KDLYANT Splice@chr  | 5.11E-10 | 0.008339 |
| 07Apr2011 | 1810  | 504.27  | -14.6341 | 3 K.FSQK+14 chr3@1258   | 5.08E-10 | 0.009259 |
| 07Apr2011 | 11531 | 705.83  | -15.5534 | 2 K.SNCHETK Splice@chr  | 2.38E-10 | 0.00514  |
| 11Nov2011 | 8929  | 624.37  | -27.8761 | 2 _..IIPVSVVN chr5@2023 | 1.75E-10 | 0.004528 |
| 07Apr2011 | 13802 | 916.81  | 7.490214 | 3 R.QISSAIYL chr4@1743  | 2.51E-10 | 0.004374 |
| 07Apr2011 | 7298  | 628.08  | -12.0488 | 4 K.IIMKPPFF chr4@4701  | 2.85E-10 | 0.004083 |
| 07Apr2011 | 9300  | 881.47  | 19.52679 | 2 A.HRK+14.1 chr5@1438  | 4.01E-10 | 0.009867 |
| 07Apr2011 | 7896  | 1060.66 | 25.15562 | 2 R.LISMRRM Splice@chr  | 4.88E-10 | 0.009369 |
| 07Apr2011 | 7502  | 591.32  | 18.71479 | 2 K.HPEMASI Splice@chr  | 2.18E-10 | 0.0065   |
| 07Apr2011 | 13077 | 967.61  | 26.29949 | 3 I.DIGIGIGI chr2@1250  | 3.76E-10 | 0.009146 |
| 07Apr2011 | 7037  | 966.47  | 15.71935 | 2 _..QKNCKEI chrX@1368  | 3.67E-10 | 0.006777 |
| 07Apr2011 | 257   | 402.73  | 28.07029 | 2 K.QATQVEI chr4@1021   | 6.83E-10 | 0.008624 |
| 07Apr2011 | 1972  | 517.96  | 13.50934 | 3 K.NNK+14.1 chr1@6824  | 9.38E-10 | 0.009972 |
| 07Apr2011 | 4094  | 885.55  | -2.34606 | 1 R.GDAKIIR chr4@5608   | 3.37E-10 | 0.004573 |

|           |       |         |          |                          |          |          |
|-----------|-------|---------|----------|--------------------------|----------|----------|
| 07Apr2011 | 12926 | 1133.16 | 25.87782 | 2 K.IMIKLVLK chr4@6137   | 2.58E-10 | 0.003343 |
| 07Apr2011 | 2055  | 416.56  | -17.4291 | 3 _TSRPQNF chr2@1374     | 1.53E-10 | 0.002251 |
| 07Apr2011 | 7533  | 561.03  | -18.3985 | 4 K.ELK+14.0 chr4@1085   | 3.95E-10 | 0.005256 |
| 07Apr2011 | 14567 | 582.62  | -10.3938 | 3 R.ADGQTA Splice@chr    | 4.27E-10 | 0.005523 |
| 07Apr2011 | 11419 | 738.13  | 17.00229 | 3 L.GLGLGLG Splice@chr   | 3.09E-10 | 0.007409 |
| 07Apr2011 | 11111 | 708.76  | 19.77765 | 3 K.NYQFLVG chrX@1272    | 9.46E-11 | 0.001898 |
| 07Apr2011 | 11068 | 708.76  | 19.77765 | 3 K.NYQFLVG chrX@1272    | 1.22E-11 | 4.20E-04 |
| 07Apr2011 | 5524  | 848.46  | -24.919  | 2 K.FKKKTETI chr3@1085   | 4.58E-10 | 0.006966 |
| 07Apr2011 | 10245 | 1090.53 | -18.1295 | 2 K.INGVTVA chr3@6296    | 1.80E-10 | 0.002875 |
| 07Apr2011 | 8752  | 991.06  | 2.897484 | 2 R.HKFTLNF chr1@1374    | 4.51E-10 | 0.007729 |
| 07Apr2011 | 13866 | 762.43  | -5.69597 | 1 R.GVSGKW chr5@4484     | 1.08E-10 | 0.002261 |
| 07Apr2011 | 13618 | 1161.61 | 4.697992 | 3 K.FHLLM+1 chr4@1440    | 6.99E-11 | 8.78E-04 |
| 11Nov2011 | 17087 | 893.98  | 23.35659 | 2 K.CTHLDKT chr5@2031    | 2.49E-10 | 0.006126 |
| 07Apr2011 | 8444  | 663.9   | 7.273902 | 2 R.ILELIYIFFI chr5@1360 | 5.23E-11 | 9.86E-04 |
| 07Apr2011 | 12083 | 800.5   | 27.56037 | 2 K.ARNK+14 chr5@1195    | 3.75E-10 | 0.007986 |
| 07Apr2011 | 12146 | 852.2   | 11.18618 | 3 K.LEPNLRK chrX@1695    | 2.03E-10 | 0.00353  |
| 07Apr2011 | 13118 | 1033.14 | 10.91688 | 2 K.M+15.99 chrX@4615    | 1.16E-10 | 0.002544 |
| 07Apr2011 | 3680  | 561.03  | -20.7972 | 4 _KSSHLGH chr5@1534     | 1.30E-10 | 0.002079 |
| 07Apr2011 | 10835 | 873.42  | -17.9668 | 4 K.FCK+14.0 chr2@1305   | 5.08E-10 | 0.006981 |
| 11Nov2011 | 11637 | 700.91  | 19.76809 | 2 K.K+14.016 chr3@1076   | 1.38E-10 | 0.003448 |
| 11Nov2011 | 12496 | 667.34  | -29.5855 | 2 _NFSVSVV chr2@7190     | 1.61E-14 | 0        |
| 07Apr2011 | 2872  | 438.25  | -7.88684 | 2 R.DPKPPPP chr1@1285    | 9.73E-11 | 0.001803 |
| 07Apr2011 | 2922  | 438.26  | 15.00593 | 2 R.DPKPPPP chr1@1285    | 9.59E-11 | 0.001927 |
| 07Apr2011 | 3831  | 871.47  | -28.0062 | 1 _GAPGRRR Splice@chr    | 3.05E-11 | 3.55E-04 |
| 07Apr2011 | 3959  | 871.47  | -28.0062 | 1 _GAPGRRR Splice@chr    | 2.17E-10 | 0.002922 |
| 07Apr2011 | 14210 | 716.41  | 6.313414 | 1 K.GTGVGLC chr3@5080    | 2.10E-10 | 0.002313 |
| 07Apr2011 | 5609  | 956.95  | -4.66089 | 2 _M+15.99 Splice@chr    | 2.78E-10 | 0.005498 |
| 07Apr2011 | 13432 | 668.35  | 3.018191 | 1 K.GAPGNPI chr4@1072    | 1.56E-10 | 0.002369 |
| 07Apr2011 | 2092  | 506.59  | -1.60963 | 3 K.KIACAHN chr1@5851    | 5.65E-10 | 0.008603 |
| 07Apr2011 | 11302 | 672.59  | 13.91003 | 5 R.K+14.016 Splice@chr  | 3.79E-10 | 0.008624 |
| 11Nov2011 | 30791 | 970.95  | 14.45044 | 2 R.FPRNLDP Splice@chr   | 9.97E-12 | 2.70E-04 |
| 07Apr2011 | 15271 | 527.79  | 3.128341 | 4 K.TLQM+1 Splice@chr    | 6.32E-10 | 0.009536 |
| 07Apr2011 | 3856  | 517.3   | -29.6109 | 3 R.SNWKIYK chr3@7238    | 3.17E-10 | 0.00582  |
| 07Apr2011 | 4434  | 525.28  | 20.62108 | 3 R.IYSCVQLC chr1@6135   | 4.09E-10 | 0.009275 |
| 11Nov2011 | 9220  | 831.48  | 13.44968 | 1 R.SSINAALF Splice@chr  | 5.14E-10 | 0.009993 |
| 07Apr2011 | 10806 | 939.59  | 10.6392  | 2 K.KFQK+14 chr2@1358    | 1.38E-10 | 0.003389 |
| 07Apr2011 | 12172 | 839.94  | -12.7016 | 2 R.FRWGEV chr2@1512     | 2.22E-10 | 0.003411 |
| 07Apr2011 | 1214  | 471.26  | 2.790544 | 2 _EFPPPINR Splice@chr   | 1.22E-10 | 0.003507 |
| 07Apr2011 | 9411  | 788.89  | -20.9158 | 2 K.KSCLSK+1 Splice@chr  | 4.36E-10 | 0.005523 |
| 07Apr2011 | 11404 | 638.8   | -14.6415 | 2 R.KLWNGG chrX@3256     | 1.60E-14 | 0        |
| 07Apr2011 | 12074 | 844.15  | -27.5075 | 4 R.YVSSAPV chr5@1410    | 2.67E-10 | 0.005336 |
| 11Nov2011 | 17549 | 717.88  | 5.023339 | 2 R.LNIAMN Splice@chr    | 4.13E-10 | 0.008594 |
| 07Apr2011 | 3883  | 846.43  | 17.73595 | 2 K.KREFYDK chr3@2317    | 4.27E-10 | 0.006396 |
| 07Apr2011 | 11210 | 963.98  | 11.85259 | 2 R.MM+15. Splice@chr    | 5.54E-10 | 0.007699 |
| 07Apr2011 | 10352 | 623.84  | 9.730992 | 4 K.KSVENG T chr1@2230   | 5.94E-10 | 0.009387 |
| 07Apr2011 | 12048 | 941.01  | 14.19631 | 2 R.WDQNTF chr2@1168     | 5.00E-10 | 0.007152 |
| 07Apr2011 | 10865 | 732.13  | -15.678  | 4 K.LKKGSPK chr5@6495    | 2.93E-10 | 0.006026 |

|           |       |         |          |                        |          |          |
|-----------|-------|---------|----------|------------------------|----------|----------|
| 11Nov2011 | 10961 | 566.31  | 21.45326 | 2 R.EVAQLEC chr5@1706  | 1.01E-10 | 0.002714 |
| 11Nov2011 | 11012 | 566.31  | 21.45326 | 2 R.EVAQLEC chr5@1706  | 1.57E-10 | 0.003842 |
| 11Nov2011 | 10374 | 566.31  | 21.45326 | 2 R.EVAQLEC chr5@1706  | 5.57E-11 | 0.001465 |
| 11Nov2011 | 4201  | 1059.53 | -27.0998 | 1 _YDHKNAI chr5@1738   | 2.45E-10 | 0.006019 |
| 11Nov2011 | 4148  | 1059.53 | -27.0998 | 1 _YDHKNAI chr5@1738   | 2.94E-11 | 7.67E-04 |
| 07Apr2011 | 595   | 488.28  | -14.2793 | 2 R.LCTILTVR chrX@1060 | 4.27E-10 | 0.0059   |
| 11Nov2011 | 23117 | 760.71  | 25.70975 | 3 R.DLPDNEE chr1@8875  | 1.55E-10 | 0.003785 |
| 07Apr2011 | 11976 | 878.86  | -27.0688 | 3 R.LKHGPRF chr2@4152  | 4.62E-10 | 0.009166 |
| 07Apr2011 | 10781 | 749.16  | 5.080877 | 4 _TRENDKP chrX@5097   | 4.54E-10 | 0.007729 |
| 11Nov2011 | 24948 | 895     | -10.9918 | 2 K.M+15.99 chrX@1449  | 3.84E-10 | 0.008217 |
| 11Nov2011 | 25006 | 894.99  | -22.1883 | 2 K.M+15.99 chrX@1449  | 5.47E-12 | 2.70E-04 |
| 07Apr2011 | 12003 | 780.08  | 26.98947 | 3 K.YQLNTHK Splice@chr | 4.72E-11 | 0.001305 |
| 07Apr2011 | 6828  | 625.88  | -19.9256 | 2 R.RK+14.01 chr4@2691 | 1.59E-10 | 0.004582 |
| 07Apr2011 | 10409 | 944.59  | 8.020944 | 2 R.QCTKKIK chrX@1034  | 4.70E-10 | 0.009166 |
| 07Apr2011 | 7242  | 616.98  | -0.23017 | 3 R.MSQEVA Splice@chr  | 6.64E-10 | 0.008624 |
| 07Apr2011 | 5202  | 435.27  | 18.69338 | 4 K.RRSSAGK chr3@1088  | 5.09E-10 | 0.006833 |
| 11Nov2011 | 3211  | 1065.51 | -21.5582 | 1 K.FNNSEKA Splice@chr | 2.84E-10 | 0.006436 |
| 07Apr2011 | 5164  | 523.28  | -0.70119 | 2 K.IENSGTP chr5@7249  | 2.24E-10 | 0.004474 |
| 07Apr2011 | 2675  | 555.05  | 3.114503 | 4 K.KKEEEVD chr1@1434  | 9.45E-14 | 0        |
| 07Apr2011 | 1710  | 493.78  | -0.06193 | 2 R.QTGTLP E chr2@8255 | 1.36E-10 | 0.004643 |
| 07Apr2011 | 7240  | 517.96  | 7.005376 | 3 K.NLK+14.C chr5@1571 | 2.70E-10 | 0.00453  |
| 07Apr2011 | 9600  | 690.61  | -23.8823 | 4 K.WLVVYV chrX@9246   | 5.76E-10 | 0.00799  |
| 07Apr2011 | 11721 | 859.91  | -23.4383 | 4 _ISM TNSN chrX@1761  | 7.66E-11 | 0.001364 |
| 11Nov2011 | 9139  | 563.01  | -10.7516 | 4 R.WNDEDS chrX@1539   | 3.79E-10 | 0.008053 |
| 07Apr2011 | 4477  | 795.42  | 1.690276 | 1 K.MTGIAFR chr4@1145  | 5.32E-10 | 0.007282 |
| 07Apr2011 | 13352 | 833.41  | -1.74133 | 4 _RWSTEIM chrX@1608   | 3.74E-10 | 0.008954 |
| 11Nov2011 | 21089 | 849.93  | 18.38221 | 2 Q.DSSYFVE Splice@chr | 6.28E-11 | 0.001734 |
| 11Nov2011 | 17827 | 719.39  | 28.86707 | 2 R.FTQAGSE Splice@chr | 3.68E-13 | 0        |
| 11Nov2011 | 23864 | 1216.58 | -19.8654 | 2 L.RNTRNDI chr4@1012  | 2.33E-10 | 0.004914 |
| 11Nov2011 | 8623  | 434.24  | 13.9946  | 3 _RSNDQTI chr5@6378   | 3.31E-10 | 0.006802 |
| 11Nov2011 | 10431 | 566.31  | 21.45326 | 2 R.EVAQLEC chr5@1706  | 4.68E-11 | 0.001197 |
| 11Nov2011 | 14027 | 1345.63 | -24.7692 | 2 _QVREMH Splice@chr   | 1.16E-10 | 0.003024 |
| 11Nov2011 | 6398  | 741.38  | -23.1647 | 2 K.FPENRHI chr2@1477  | 9.04E-11 | 0.002245 |
| 11Nov2011 | 14965 | 691.85  | 23.12212 | 2 _M+15.99 chr5@1026   | 4.81E-10 | 0.009623 |
| 11Nov2011 | 10503 | 1063.58 | 1.14882  | 1 K.YLINGNEI chr1@8687 | 3.22E-10 | 0.006371 |
| 11Nov2011 | 6576  | 936.48  | 27.86052 | 1 K.LNGGYEC chr2@1191  | 1.78E-10 | 0.003944 |
| 11Nov2011 | 15948 | 671.37  | -24.0361 | 2 T.FNIVHTQ Splice@chr | 2.97E-10 | 0.006082 |
| 11Nov2011 | 3457  | 615.8   | -16.0827 | 2 _QLEISFDI Splice@chr | 1.58E-10 | 0.0037   |
| 11Nov2011 | 3980  | 412.23  | 25.3069  | 2 R.IASYQGG chrX@1679  | 3.11E-11 | 6.48E-04 |
| 11Nov2011 | 14250 | 762.84  | -28.3604 | 2 G.TSK+14.C chr5@9327 | 2.06E-10 | 0.004303 |
| 11Nov2011 | 9897  | 677.34  | -8.57314 | 2 K.MQQFST chr5@2080   | 4.33E-10 | 0.008663 |
| 11Nov2011 | 27098 | 876.99  | -11.1881 | 2 V.FPCK+14 chrX@2447  | 2.92E-10 | 0.00602  |
| 11Nov2011 | 5599  | 537.79  | -24.2187 | 2 K.DQGMLN chr5@2023   | 2.40E-10 | 0.004914 |
| 11Nov2011 | 552   | 703.38  | -2.78167 | 1 _DAAGLAC chr3@2528   | 5.12E-12 | 7.72E-05 |
| 11Nov2011 | 7210  | 553.78  | -10.2208 | 2 R.TASQK+1 chrX@5438  | 4.80E-10 | 0.009623 |
| 11Nov2011 | 1229  | 552.3   | 10.18569 | 2 R.TQNATAI Splice@chr | 4.65E-11 | 0.001197 |
| 11Nov2011 | 1335  | 503.28  | -21.0222 | 2 K.RSLEYIPK chr1@1227 | 1.15E-10 | 0.003024 |

|           |       |         |          |                          |          |          |
|-----------|-------|---------|----------|--------------------------|----------|----------|
| 11Nov2011 | 17882 | 719.39  | 28.86707 | 2 R.FTQAGSE Splice@chr   | 3.64E-13 | 0        |
| 11Nov2011 | 19842 | 833.93  | -9.2006  | 2 _..IIEPYVAV Splice@chr | 7.25E-13 | 0        |
| 11Nov2011 | 19896 | 833.92  | -21.2254 | 2 _..IIEPYVAV Splice@chr | 2.76E-11 | 5.79E-04 |
| 11Nov2011 | 19425 | 664.7   | 1.197202 | 3 _..PTLNK+1. chr1@6526  | 2.09E-10 | 0.004367 |
| 11Nov2011 | 16674 | 833.42  | -4.62234 | 1 K.HEVTVFT chr4@1317    | 1.33E-10 | 0.003389 |
| 11Nov2011 | 14375 | 762.85  | -15.3018 | 2 G.TSK+14.C chr5@9327   | 4.48E-11 | 0.001128 |
| 11Nov2011 | 200   | 848.41  | 2.093776 | 1 R.EEAELEK. chr2@4805   | 2.25E-10 | 0.004677 |
| 11Nov2011 | 7156  | 553.78  | -10.2208 | 2 R.TASQK+1 chrX@5438    | 4.74E-11 | 0.001197 |
| 11Nov2011 | 28097 | 792.15  | -18.5783 | 4 K.SGTIFDNI Splice@chr  | 3.69E-18 | 0        |
| 11Nov2011 | 22018 | 804.91  | 25.79416 | 2 _..LTMTWN chr1@4515    | 1.68E-10 | 0.003827 |
| 11Nov2011 | 30365 | 1129.09 | 2.301452 | 2 R.K+14.016 chr2@5339   | 5.53E-11 | 0.001465 |
| 11Nov2011 | 12690 | 1130.65 | 12.16972 | 1 R.ISLTNANI chr5@7795   | 3.71E-10 | 0.007466 |
| 11Nov2011 | 24807 | 665.37  | -26.6417 | 2 Q.INNK+14 Splice@chr   | 4.42E-10 | 0.008663 |
| 11Nov2011 | 16552 | 833.42  | -4.62234 | 1 K.HEVTVFT chr4@1317    | 1.33E-10 | 0.003389 |
| 11Nov2011 | 12639 | 1130.65 | 12.16972 | 1 R.ISLTNANI chr5@7795   | 2.80E-10 | 0.005523 |
| 11Nov2011 | 1415  | 503.28  | -21.0222 | 2 K.RSLEYIPK chr1@1227   | 1.36E-10 | 0.003389 |
| 11Nov2011 | 4433  | 1059.53 | -27.0998 | 1 _..YDHKNAI chr5@1738   | 3.18E-10 | 0.005236 |
| 11Nov2011 | 11945 | 975.55  | -13.0268 | 1 K.LPKLDAYI chr4@1149   | 1.37E-10 | 0.002442 |
| 11Nov2011 | 6967  | 937.48  | 24.27422 | 1 K.LNGGYEC chr2@1191    | 4.45E-11 | 0.001291 |
| 11Nov2011 | 31059 | 968.13  | 18.26018 | 3 _..GCSIVPIS Splice@chr | 3.89E-11 | 0.001291 |
| 11Nov2011 | 33539 | 1147.24 | 4.705638 | 3 R.FQSAAIG Splice@chr   | 7.68E-14 | 0        |
| 11Nov2011 | 25950 | 1216.58 | -19.8654 | 2 L.RNTRNDI chr4@1012    | 3.11E-10 | 0.00508  |
| 11Nov2011 | 6766  | 741.38  | -23.1647 | 2 K.FPENRHI chr2@1477    | 2.18E-10 | 0.003639 |
| 11Nov2011 | 31149 | 954.46  | 24.98958 | 4 K.FAFADEE Splice@chr   | 5.57E-11 | 0.001503 |
| 11Nov2011 | 11325 | 1063.58 | 1.14882  | 1 K.YLINGNEI chr1@8687   | 5.95E-10 | 0.009614 |
| 11Nov2011 | 25883 | 1216.58 | -19.8654 | 2 L.RNTRNDI chr4@1012    | 4.82E-10 | 0.00808  |
| 11Nov2011 | 11435 | 1063.58 | 1.14882  | 1 K.YLINGNEI chr1@8687   | 5.28E-10 | 0.008574 |
| 11Nov2011 | 25022 | 969.01  | -11.2595 | 2 Y.QRHVFNI Splice@chr   | 2.15E-10 | 0.003535 |
| 11Nov2011 | 19289 | 719.38  | 14.92317 | 2 R.FTQAGSE Splice@chr   | 1.39E-13 | 0        |
| 11Nov2011 | 31195 | 954.46  | 24.98958 | 4 K.FAFADEE Splice@chr   | 4.90E-11 | 0.001346 |
| 11Nov2011 | 6946  | 936.48  | 27.86052 | 1 K.LNGGYEC chr2@1191    | 4.03E-11 | 0.001291 |
| 11Nov2011 | 845   | 552.3   | 10.18569 | 2 R.TQNATAI Splice@chr   | 3.40E-11 | 0.001069 |
| 11Nov2011 | 495   | 722.35  | 3.723    | 1 R.FQGGGEI chr1@2595    | 3.38E-10 | 0.005539 |
| 11Nov2011 | 11034 | 559.79  | 11.35993 | 2 R.DGWSIG chr4@4255     | 2.58E-10 | 0.004261 |
| 11Nov2011 | 18036 | 717.88  | 5.023339 | 2 R.LNIAMN Splice@chr    | 3.26E-10 | 0.005277 |
| 11Nov2011 | 19342 | 719.38  | 14.92317 | 2 R.FTQAGSE Splice@chr   | 4.78E-13 | 7.07E-05 |
| 11Nov2011 | 31159 | 1272.28 | 27.03865 | 3 K.FAFADEE Splice@chr   | 4.01E-14 | 0        |
| 11Nov2011 | 869   | 556.31  | 12.70857 | 2 K.KNAEFFLI chr1@9699   | 3.31E-10 | 0.005277 |
| 11Nov2011 | 27174 | 849.41  | -3.23735 | 2 Q.DSSYFVE Splice@chr   | 2.79E-11 | 9.65E-04 |
| 11Nov2011 | 9112  | 795.42  | 1.690276 | 1 K.MTGIAFR chr4@1145    | 6.07E-10 | 0.009971 |
| 11Nov2011 | 4384  | 1059.53 | -27.0998 | 1 _..YDHKNAI chr5@1738   | 4.69E-11 | 0.001291 |
| 11Nov2011 | 33617 | 1147.24 | 4.705638 | 3 R.FQSAAIG Splice@chr   | 4.31E-15 | 0        |
| 11Nov2011 | 29451 | 957.5   | 1.956888 | 3 R.FIEPIEDIF Splice@chr | 4.46E-10 | 0.007574 |
| 11Nov2011 | 11335 | 1064.58 | -2.00842 | 1 K.YLINGNEI chr1@8687   | 9.16E-11 | 0.001759 |
| 11Nov2011 | 20918 | 664.7   | 1.197202 | 3 _..PTLNK+1. chr1@6526  | 1.14E-10 | 0.002285 |
| 11Nov2011 | 959   | 405.21  | -4.37903 | 2 R.IEHADPK chr4@6332    | 5.51E-10 | 0.009023 |
| 11Nov2011 | 13316 | 625.82  | -20.2839 | 2 R.K+14.016 chrX@1356   | 5.22E-10 | 0.008574 |

|           |       |         |          |                         |          |          |
|-----------|-------|---------|----------|-------------------------|----------|----------|
| 11Nov2011 | 10638 | 559.79  | 11.35993 | 2 R.DGWSIG chr4@425     | 5.03E-10 | 0.008381 |
| 11Nov2011 | 10443 | 1025.61 | -11.6755 | 1 K.LGLGSG chr5@494     | 6.28E-12 | 4.48E-04 |
| 11Nov2011 | 13615 | 565.83  | 14.11658 | 2 R.ISLTNANI chr5@779   | 4.06E-10 | 0.006761 |
| 11Nov2011 | 881   | 552.3   | 10.18569 | 2 R.TQNATAI Splice@chr  | 7.01E-11 | 0.001704 |
| 11Nov2011 | 964   | 556.31  | 12.70857 | 2 K.KNAEFFLI chr1@969   | 1.78E-10 | 0.003018 |
| 11Nov2011 | 12006 | 975.55  | -13.0268 | 1 K.LPKLDAYI chr4@114   | 1.94E-10 | 0.003226 |
| 11Nov2011 | 8791  | 693.87  | -6.6949  | 2 V.ICVAVGD chr5@106    | 4.23E-11 | 0.001291 |
| 11Nov2011 | 13266 | 746.36  | -23.1469 | 2 R.SYHYVAF Splice@chr  | 6.99E-11 | 0.001704 |
| 11Nov2011 | 17175 | 851.48  | -15.2578 | 2 K.RGVRLSH chr2@278    | 2.93E-10 | 0.00477  |
| 11Nov2011 | 7772  | 1107.56 | -21.6943 | 1 _SSLDKESC chr5@123    | 8.21E-11 | 0.001704 |
| 11Nov2011 | 32667 | 929.15  | -28.8338 | 3 R.KSTAKLK chr2@859    | 2.30E-10 | 0.003793 |
| 11Nov2011 | 11446 | 1064.58 | -2.00842 | 1 K.YLINGNEI chr1@868   | 1.95E-10 | 0.003226 |
| 11Nov2011 | 10983 | 559.79  | 11.35993 | 2 R.DGWSIG chr4@425     | 1.19E-10 | 0.002285 |
| 11Nov2011 | 13661 | 565.83  | 14.11658 | 2 R.ISLTNANI chr5@779   | 5.47E-10 | 0.009023 |
| 11Nov2011 | 687   | 702.38  | 2.001521 | 1 _DAAGLAC chr3@252     | 1.29E-11 | 5.58E-04 |
| 11Nov2011 | 20977 | 664.7   | 1.197202 | 3 _PTLNK+1 chr1@652     | 3.89E-10 | 0.006508 |
| 11Nov2011 | 6821  | 741.38  | -23.1647 | 2 K.FPENRHI chr2@147    | 7.69E-11 | 0.001704 |
| 11Nov2011 | 25501 | 809.11  | 19.47063 | 3 _AKNATKY chr1@309     | 9.64E-13 | 7.07E-05 |
| 11Nov2011 | 22892 | 849.93  | 18.38221 | 2 Q.DSSYFVE Splice@chr  | 4.36E-12 | 3.31E-04 |
| 11Nov2011 | 21700 | 1090.53 | -18.1295 | 2 K.INGVTVA chr3@629    | 5.25E-10 | 0.008574 |
| 11Nov2011 | 32617 | 928.82  | -24.1202 | 3 R.KSTAKLK chr2@859    | 3.80E-10 | 0.006411 |
| 11Nov2011 | 27594 | 890.43  | 3.605981 | 2 K.GWSVPLI Splice@chr  | 2.49E-10 | 0.003999 |
| 11Nov2011 | 22323 | 1034.57 | -2.45085 | 2 K.FK+14.01 Splice@chr | 1.72E-11 | 6.78E-04 |
| 11Nov2011 | 21813 | 1090.53 | -18.1295 | 2 K.INGVTVA chr3@629    | 5.44E-10 | 0.009023 |
| 11Nov2011 | 10550 | 1025.61 | -11.6755 | 1 K.LGLGSG chr5@494     | 1.43E-11 | 5.58E-04 |
| 11Nov2011 | 7835  | 553.78  | -25.7264 | 2 _SSLDKESC chr5@123    | 3.00E-10 | 0.004874 |
| 11Nov2011 | 31307 | 1216.58 | -19.8654 | 2 L.RNTRNDI chr4@101    | 4.61E-10 | 0.00762  |
| 11Nov2011 | 33597 | 860.68  | 2.433027 | 4 R.FQSAAIG Splice@chr  | 4.11E-14 | 0        |
| 11Nov2011 | 26924 | 890.45  | 26.12723 | 2 K.GWSVPLI Splice@chr  | 4.52E-10 | 0.007574 |
| 11Nov2011 | 11386 | 1064.58 | -2.00842 | 1 K.YLINGNEI chr1@868   | 2.41E-11 | 8.47E-04 |
| 11Nov2011 | 21755 | 1090.53 | -18.1295 | 2 K.INGVTVA chr3@629    | 3.29E-10 | 0.005277 |
| 11Nov2011 | 19401 | 719.39  | 28.86707 | 2 R.FTQAGSE Splice@chr  | 4.85E-13 | 7.07E-05 |
| 11Nov2011 | 7716  | 1107.56 | -21.6943 | 1 _SSLDKESC chr5@123    | 1.11E-10 | 0.002242 |
| 11Nov2011 | 11235 | 566.31  | 21.45326 | 2 R.EVAQLEC chr5@170    | 4.98E-11 | 0.001346 |
| 11Nov2011 | 21492 | 774.96  | 16.29715 | 2 E.DILFVINK Splice@chr | 3.28E-11 | 0.001069 |
| 11Nov2011 | 11377 | 1063.58 | 1.14882  | 1 K.YLINGNEI chr1@868   | 5.74E-10 | 0.009267 |
| 11Nov2011 | 7002  | 936.48  | 27.86052 | 1 K.LNGGYEC chr2@119    | 2.19E-11 | 7.92E-04 |
| 11Nov2011 | 13636 | 565.83  | 14.11658 | 2 R.ISLTNANI chr5@779   | 3.94E-10 | 0.008069 |
| 11Nov2011 | 10650 | 677.34  | -8.57314 | 2 K.MQQFST chr5@208     | 2.74E-10 | 0.005976 |
| 11Nov2011 | 30818 | 1000.51 | -15.4866 | 2 E.CLVVNLS Splice@chr  | 4.15E-11 | 0.001699 |
| 11Nov2011 | 27176 | 1385.74 | 7.1914   | 1 K.FQNFQAI chr2@222    | 3.80E-11 | 0.001642 |
| 11Nov2011 | 26506 | 665.37  | -26.6417 | 2 Q.INNK+14 Splice@chr  | 3.69E-10 | 0.007582 |
| 11Nov2011 | 21149 | 774.96  | 16.29715 | 2 E.DILFVINK Splice@chr | 1.81E-11 | 0.001036 |
| 11Nov2011 | 24266 | 853.45  | -23.3178 | 2 K.NFKINSKI chr4@581   | 3.99E-10 | 0.008175 |
| 11Nov2011 | 7029  | 936.48  | 27.86052 | 1 K.LNGGYEC chr2@119    | 2.66E-11 | 0.001098 |
| 11Nov2011 | 13142 | 625.82  | -20.2839 | 2 R.K+14.016 chrX@135   | 2.91E-10 | 0.006247 |
| 11Nov2011 | 16946 | 671.37  | -24.0361 | 2 T.FNIVHTQ Splice@chr  | 3.11E-10 | 0.00657  |

|           |       |         |          |                         |          |          |
|-----------|-------|---------|----------|-------------------------|----------|----------|
| 11Nov2011 | 31767 | 1147.25 | 13.44098 | 3 R.FQSAAIG Splice@chr  | 3.77E-14 | 0        |
| 11Nov2011 | 10836 | 1089.65 | -29.1532 | 1 K.KLKSMKN chr5@3701   | 1.38E-10 | 0.003322 |
| 11Nov2011 | 10972 | 559.79  | 11.35993 | 2 R.DGWSIG chr4@4255    | 9.80E-11 | 0.002715 |
| 11Nov2011 | 10781 | 1089.65 | -29.1532 | 1 K.KLKSMKN chr5@3701   | 3.50E-10 | 0.007322 |
| 11Nov2011 | 11335 | 1063.58 | 1.14882  | 1 K.YLINGNEI chr1@8687  | 5.92E-11 | 0.002161 |
| 11Nov2011 | 15153 | 1345.63 | -24.7692 | 2 _QVREMH Splice@chr    | 7.83E-11 | 0.002622 |
| 11Nov2011 | 20583 | 664.7   | 1.197202 | 3 _PTLNK+1. chr1@6526   | 3.69E-11 | 0.001642 |
| 11Nov2011 | 31841 | 1147.24 | 4.705638 | 3 R.FQSAAIG Splice@chr  | 1.15E-12 | 2.19E-04 |
| 11Nov2011 | 16771 | 671.37  | -24.0361 | 2 T.FNIVHTQ Splice@chr  | 3.22E-10 | 0.006785 |
| 11Nov2011 | 10577 | 559.79  | 11.35993 | 2 R.DGWSIG chr4@4255    | 1.11E-10 | 0.003002 |
| 11Nov2011 | 10922 | 559.79  | 11.35993 | 2 R.DGWSIG chr4@4255    | 3.66E-10 | 0.007582 |
| 11Nov2011 | 22026 | 1034.57 | -2.45085 | 2 K.FK+14.01 Splice@chr | 3.17E-12 | 2.83E-04 |
| 11Nov2011 | 10481 | 1026.62 | -5.1804  | 1 K.LGLGSG chr5@4945    | 5.53E-12 | 3.50E-04 |
| 11Nov2011 | 16885 | 671.37  | -24.0361 | 2 T.FNIVHTQ Splice@chr  | 4.27E-10 | 0.008597 |
| 11Nov2011 | 7016  | 937.48  | 24.27422 | 1 K.LNGGYEC chr2@1191   | 2.24E-11 | 0.001036 |
| 11Nov2011 | 30787 | 1000.51 | -15.4866 | 2 E.CLVVNLS Splice@chr  | 1.15E-10 | 0.003055 |
| 11Nov2011 | 3381  | 439.74  | 18.7116  | 2 R.SIAMFGP chr2@4157   | 1.85E-10 | 0.004601 |
| 11Nov2011 | 18994 | 719.39  | 28.86707 | 2 R.FTQAGSE Splice@chr  | 2.58E-13 | 0        |
| 11Nov2011 | 20639 | 664.7   | 1.197202 | 3 _PTLNK+1. chr1@6526   | 3.27E-11 | 0.001337 |
| 11Nov2011 | 25256 | 895.5   | -12.868  | 2 K.M+15.99 chrX@1449   | 1.01E-12 | 2.19E-04 |
| 11Nov2011 | 25392 | 1216.58 | -19.8654 | 2 L.RNTRNDI chr4@1012   | 4.58E-10 | 0.008903 |
| 11Nov2011 | 25458 | 1216.58 | -19.8654 | 2 L.RNTRNDI chr4@1012   | 4.33E-10 | 0.008762 |
| 11Nov2011 | 243   | 848.41  | 2.093776 | 1 R.EEAELEK. chr2@4805  | 2.25E-10 | 0.005215 |
| 11Nov2011 | 18940 | 719.39  | 28.86707 | 2 R.FTQAGSE Splice@chr  | 1.31E-13 | 0        |
| 11Nov2011 | 24581 | 969.01  | -11.2595 | 2 Y.QRHVFNI Splice@chr  | 3.88E-10 | 0.008017 |
| 11Nov2011 | 17732 | 717.88  | 5.023339 | 2 R.LNIAMN\ Splice@chr  | 4.04E-10 | 0.008282 |
| 11Nov2011 | 7692  | 1107.57 | -12.7508 | 1 _SSLDKESC chr5@1239   | 1.53E-10 | 0.003602 |
| 11Nov2011 | 6839  | 741.38  | -23.1647 | 2 K.FPENRHI chr2@1477   | 2.73E-10 | 0.005976 |
| 11Nov2011 | 16862 | 851.49  | -3.4814  | 2 K.RGVRLSH chr2@2785   | 1.62E-10 | 0.003711 |
| 11Nov2011 | 15885 | 943.57  | -2.9787  | 1 _SPLFVPKI chrX@4402   | 1.30E-10 | 0.003269 |
| 11Nov2011 | 30101 | 968.13  | 18.26018 | 3 _GCSIVPIS Splice@chr  | 3.09E-10 | 0.006517 |
| 11Nov2011 | 15967 | 599.34  | -5.64446 | 3 _INKFLIFK- chr4@1511  | 4.93E-10 | 0.009375 |
| 11Nov2011 | 25329 | 895     | -10.9918 | 2 K.M+15.99 chrX@1449   | 4.07E-10 | 0.008334 |
| 11Nov2011 | 22461 | 849.93  | 18.38221 | 2 Q.DSSYFVE Splice@chr  | 6.34E-11 | 0.002161 |
| 11Nov2011 | 10469 | 1025.61 | -11.6755 | 1 K.LGLGSG chr5@4945    | 8.67E-12 | 6.12E-04 |
| 11Nov2011 | 11462 | 1063.58 | 1.14882  | 1 K.YLINGNEI chr1@8687  | 2.42E-10 | 0.005543 |
| 11Nov2011 | 600   | 702.38  | 2.001521 | 1 _DAAGLAC chr3@2528    | 5.12E-12 | 3.50E-04 |
| 11Nov2011 | 606   | 703.38  | -2.78167 | 1 _DAAGLAC chr3@2528    | 5.21E-12 | 3.50E-04 |
| 11Nov2011 | 11345 | 1064.58 | -2.00842 | 1 K.YLINGNEI chr1@8687  | 4.18E-11 | 0.001699 |
| 11Nov2011 | 13124 | 746.36  | -23.1469 | 2 R.SYHYVAF Splice@chr  | 1.66E-10 | 0.003996 |
| 11Nov2011 | 11172 | 566.31  | 21.45326 | 2 R.EVAQLEC chr5@1706   | 6.50E-11 | 0.002218 |
| 11Nov2011 | 31781 | 860.69  | 14.08015 | 4 R.FQSAAIG Splice@chr  | 3.07E-12 | 2.83E-04 |
| 11Nov2011 | 22511 | 849.93  | 18.38221 | 2 Q.DSSYFVE Splice@chr  | 1.37E-13 | 0        |
| 11Nov2011 | 27004 | 890.44  | 14.86661 | 2 K.GWSVPLI Splice@chr  | 2.88E-11 | 0.001152 |
| 11Nov2011 | 1290  | 503.28  | -21.0222 | 2 K.RSLEYIPK chr1@1227  | 2.20E-10 | 0.005105 |
| 11Nov2011 | 8713  | 693.87  | -6.6949  | 2 V.ICVAVGD chr5@1065   | 1.58E-10 | 0.003711 |
| 11Nov2011 | 21178 | 833.92  | -21.2254 | 2 _IIEPYVAV Splice@chr  | 3.02E-11 | 0.001152 |

|           |       |         |          |                          |          |          |
|-----------|-------|---------|----------|--------------------------|----------|----------|
| 11Nov2011 | 14974 | 1345.63 | -24.7692 | 2 _QVREMH Splice@chr     | 4.25E-10 | 0.008597 |
| 11Nov2011 | 10812 | 1090.66 | -23.0402 | 1 K.KLKSMKN chr5@3701    | 4.06E-11 | 0.001699 |
| 11Nov2011 | 30119 | 1272.27 | 19.16254 | 3 K.FAVADEE Splice@chr   | 7.54E-14 | 0        |
| 11Nov2011 | 6781  | 741.38  | -23.1647 | 2 K.FPENRHI chr2@1477    | 1.64E-10 | 0.003766 |
| 11Nov2011 | 31449 | 963.14  | 25.74479 | 3 _GCSIVPIS Splice@chr   | 2.78E-12 | 2.19E-04 |
| 11Nov2011 | 26644 | 849.41  | -3.23735 | 2 Q.DSSYFVE Splice@chr   | 2.66E-11 | 0.001098 |
| 11Nov2011 | 25027 | 809.11  | 19.47063 | 3 _AKNATKY chr1@3095     | 3.85E-13 | 0        |
| 11Nov2011 | 10410 | 1025.61 | -11.6755 | 1 K.LGLGSL chr5@4945     | 4.16E-12 | 2.83E-04 |
| 11Nov2011 | 11406 | 1064.58 | -2.00842 | 1 K.YLINGNEI chr1@8687   | 1.10E-10 | 0.003002 |
| 11Nov2011 | 28767 | 957.5   | 22.57714 | 3 K.LFQVLQN Splice@chr   | 2.24E-10 | 0.005215 |
| 11Nov2011 | 19057 | 719.39  | 28.86707 | 2 R.FTQAGSE Splice@chr   | 2.61E-13 | 0        |
| 11Nov2011 | 11295 | 1064.58 | -2.00842 | 1 K.YLINGNEI chr1@8687   | 7.49E-11 | 0.002444 |
| 11Nov2011 | 955   | 722.35  | 3.723    | 1 R.FQGGGEI chr1@2595    | 3.33E-10 | 0.006942 |
| 11Nov2011 | 419   | 722.35  | 3.723    | 1 R.FQGGGEI chr1@2595    | 3.33E-10 | 0.006942 |
| 11Nov2011 | 26481 | 968.47  | 20.13314 | 3 _CSIRPISG Splice@chr   | 1.50E-12 | 0        |
| 11Nov2011 | 9838  | 559.79  | 11.35993 | 2 R.DGWSIG chr4@4255     | 3.42E-10 | 0.007015 |
| 11Nov2011 | 8554  | 493.78  | -11.3951 | 2 R.KNQENLI Splice@chr   | 2.51E-10 | 0.00516  |
| 11Nov2011 | 16102 | 717.88  | 5.023339 | 2 R.LNIAMN\ Splice@chr   | 1.25E-10 | 0.002209 |
| 11Nov2011 | 9526  | 677.34  | -8.57314 | 2 K.MQQFST chr5@2080     | 3.49E-10 | 0.007015 |
| 11Nov2011 | 20396 | 849.93  | 18.38221 | 2 Q.DSSYFVE Splice@chr   | 8.16E-11 | 0.001593 |
| 11Nov2011 | 3680  | 412.23  | 25.3069  | 2 R.IASYQGG chrX@1675    | 3.80E-11 | 7.91E-04 |
| 11Nov2011 | 9631  | 1161.67 | -10.7876 | 1 K.NSKDKLV Splice@chr   | 1.99E-10 | 0.003768 |
| 11Nov2011 | 12780 | 781.41  | -6.726   | 2 K.ALEKEDIF chr1@1462   | 6.95E-15 | 0        |
| 11Nov2011 | 20344 | 849.93  | 18.38221 | 2 Q.DSSYFVE Splice@chr   | 1.42E-11 | 4.50E-04 |
| 11Nov2011 | 16156 | 717.88  | 5.023339 | 2 R.LNIAMN\ Splice@chr   | 1.07E-10 | 0.001982 |
| 11Nov2011 | 5478  | 761.39  | -21.1354 | 1 _NPISAMK chrX@8094     | 2.53E-10 | 0.005236 |
| 11Nov2011 | 6875  | 1107.56 | -21.6943 | 1 _SSLDKESC chr5@1235    | 2.41E-11 | 4.50E-04 |
| 11Nov2011 | 12234 | 1130.64 | 3.300733 | 1 R.ISLTNANI chr5@7795   | 3.34E-10 | 0.00695  |
| 11Nov2011 | 10064 | 566.31  | 21.45326 | 2 R.EVAQLEC chr5@1706    | 6.10E-11 | 0.001022 |
| 11Nov2011 | 12287 | 1130.64 | 3.300733 | 1 R.ISLTNANI chr5@7795   | 1.73E-10 | 0.003147 |
| 11Nov2011 | 26492 | 954.46  | 24.98958 | 4 K.FAVADEE Splice@chr   | 1.86E-11 | 4.50E-04 |
| 11Nov2011 | 24701 | 1003.19 | 17.13413 | 3 R.CWNRRA Splice@chr    | 2.25E-12 | 1.00E-04 |
| 11Nov2011 | 17254 | 719.38  | 14.92317 | 2 R.FTQAGSE Splice@chr   | 3.24E-13 | 0        |
| 11Nov2011 | 5281  | 433.76  | 2.609238 | 2 _IVDLPGPI chr3@1104    | 1.35E-10 | 0.002209 |
| 11Nov2011 | 610   | 703.38  | -2.78167 | 1 _DAAGLAC chr3@2528     | 5.21E-12 | 1.90E-04 |
| 11Nov2011 | 27218 | 963.13  | 15.42179 | 3 _GCSIVPIS Splice@chr   | 2.31E-10 | 0.004698 |
| 11Nov2011 | 25890 | 957.5   | 1.956888 | 3 R.FIEPIEDIF Splice@chr | 3.76E-10 | 0.007919 |
| 11Nov2011 | 27401 | 1147.24 | 4.705638 | 3 R.FQSAAIG Splice@chr   | 2.60E-15 | 0        |
| 11Nov2011 | 27399 | 860.69  | 14.08015 | 4 R.FQSAAIG Splice@chr   | 2.26E-12 | 1.00E-04 |
| 11Nov2011 | 20441 | 1056.56 | 28.0642  | 3 I.SRVEDDS Splice@chr   | 4.95E-15 | 0        |
| 11Nov2011 | 10013 | 566.31  | 21.45326 | 2 R.EVAQLEC chr5@1706    | 2.12E-10 | 0.004159 |
| 11Nov2011 | 12183 | 565.83  | 14.11658 | 2 R.ISLTNANI chr5@7795   | 3.45E-10 | 0.007015 |
| 11Nov2011 | 23099 | 1216.58 | -19.8654 | 2 L.RNTRNDI chr4@1012    | 1.40E-10 | 0.002285 |
| 11Nov2011 | 3579  | 412.23  | 25.3069  | 2 R.IASYQGG chrX@1675    | 1.61E-10 | 0.002678 |
| 11Nov2011 | 19190 | 833.92  | -21.2254 | 2 _IIEPYVAV Splice@chr   | 4.94E-12 | 1.90E-04 |
| 11Nov2011 | 3137  | 615.8   | -16.0827 | 2 _QLEISFDI Splice@chr   | 3.05E-10 | 0.006437 |
| 11Nov2011 | 12294 | 565.83  | 14.11658 | 2 R.ISLTNANI chr5@7795   | 3.51E-10 | 0.007088 |

|           |       |         |          |                          |          |          |
|-----------|-------|---------|----------|--------------------------|----------|----------|
| 11Nov2011 | 600   | 702.38  | 2.001521 | 1 _..DAAGLAC chr3@2528   | 5.12E-12 | 1.90E-04 |
| 11Nov2011 | 15328 | 851.49  | -3.4814  | 2 K.RGVRLSH chr2@2785    | 7.61E-11 | 0.001521 |
| 11Nov2011 | 24266 | 819.1   | 29.38392 | 3 K.QNSVQG Splice@chr    | 2.81E-10 | 0.00591  |
| 11Nov2011 | 897   | 403.23  | 10.8661  | 2 R.AMVASG chr5@1721     | 2.00E-10 | 0.003768 |
| 11Nov2011 | 893   | 722.35  | 3.723    | 1 R.FQGGGEI chr1@2595    | 3.33E-10 | 0.00695  |
| 11Nov2011 | 19416 | 1090.53 | -18.1295 | 2 K.INGVTVA chr3@6296    | 2.23E-10 | 0.00439  |
| 11Nov2011 | 6002  | 741.38  | -23.1647 | 2 K.FPENRHI chr2@1477    | 6.21E-11 | 0.001022 |
| 11Nov2011 | 12240 | 565.83  | 14.11658 | 2 R.ISLTNANI chr5@7795   | 2.41E-10 | 0.005007 |
| 11Nov2011 | 22974 | 895     | -10.9918 | 2 K.M+15.99 chrX@1449    | 5.10E-11 | 9.48E-04 |
| 11Nov2011 | 28429 | 1157.63 | 13.15321 | 1 _..NLVYNSK chr2@1346   | 4.50E-10 | 0.009472 |
| 11Nov2011 | 27420 | 860.69  | 14.08015 | 4 R.FQSAAIG Splice@chr   | 1.52E-13 | 0        |
| 11Nov2011 | 27424 | 1147.25 | 13.44098 | 3 R.FQSAAIG Splice@chr   | 3.80E-13 | 0        |
| 11Nov2011 | 26898 | 1000.5  | -25.5062 | 2 E.CLVVNLS Splice@chr   | 2.20E-10 | 0.00439  |
| 11Nov2011 | 9781  | 559.79  | 11.35993 | 2 R.DGWSIG chr4@4255     | 3.08E-10 | 0.006512 |
| 11Nov2011 | 25862 | 957.5   | 1.956888 | 3 R.FIEPIEDIF Splice@chr | 4.64E-10 | 0.009686 |
| 11Nov2011 | 26868 | 1000.5  | -25.5062 | 2 E.CLVVNLS Splice@chr   | 4.54E-10 | 0.009618 |
| 11Nov2011 | 6054  | 741.38  | -23.1647 | 2 K.FPENRHI chr2@1477    | 1.35E-11 | 4.50E-04 |
| 11Nov2011 | 6226  | 936.48  | 27.86052 | 1 K.LNGGYEC chr2@1191    | 1.19E-10 | 0.002063 |
| 11Nov2011 | 9304  | 1025.61 | -11.6755 | 1 K.LGLGSGL chr5@4945    | 1.62E-11 | 4.50E-04 |
| 11Nov2011 | 23037 | 895     | -10.9918 | 2 K.M+15.99 chrX@1449    | 5.59E-11 | 0.001022 |
| 11Nov2011 | 26789 | 911.42  | 20.49399 | 2 _..PRM+15. Splice@chr  | 4.70E-10 | 0.009906 |
| 11Nov2011 | 24752 | 1003.52 | 12.6889  | 3 R.CWNRRA Splice@chr    | 3.36E-13 | 0        |
| 11Nov2011 | 17312 | 719.39  | 28.86707 | 2 R.FTQAGSE Splice@chr   | 8.93E-12 | 1.90E-04 |
| 11Nov2011 | 24521 | 1385.75 | 14.42536 | 1 K.FQNFAQI chr2@2226    | 2.82E-11 | 7.08E-04 |
| 11Nov2011 | 6170  | 831.49  | -4.77706 | 1 _..SIVGNLT Splice@chr  | 7.13E-10 | 0.008541 |
| 11Nov2011 | 9027  | 1161.66 | -19.4191 | 1 K.NSKDKLV Splice@chr   | 2.39E-10 | 0.002564 |
| 11Nov2011 | 23253 | 1003.52 | 12.6889  | 3 R.CWNRRA Splice@chr    | 2.18E-10 | 0.002391 |
| 11Nov2011 | 19236 | 849.93  | 18.38221 | 2 Q.DSSYFVE Splice@chr   | 2.28E-10 | 0.002391 |
| 11Nov2011 | 5664  | 936.48  | 27.86052 | 1 K.LNGGYEC Splice@chr   | 9.09E-11 | 7.46E-04 |
| 11Nov2011 | 12953 | 1345.63 | -24.7692 | 2 _..QVREMH Splice@chr   | 2.21E-10 | 0.002391 |
| 11Nov2011 | 7833  | 493.78  | -11.3951 | 2 R.KNQENLI Splice@chr   | 2.72E-10 | 0.002979 |
| 11Nov2011 | 12900 | 1345.63 | -24.7692 | 2 _..QVREMH Splice@chr   | 1.76E-10 | 0.002068 |
| 11Nov2011 | 411   | 703.38  | -2.78167 | 1 _..DAAGLAC chr3@2528   | 1.21E-11 | 1.05E-04 |
| 11Nov2011 | 24583 | 792.16  | -5.99938 | 4 K.SGTIFDNI Splice@chr  | 4.28E-15 | 0        |
| 11Nov2011 | 25198 | 963.14  | 25.74479 | 3 _..GCSIVPIS Splice@chr | 1.34E-10 | 0.001181 |
| 11Nov2011 | 12889 | 1346.13 | -3.69865 | 2 _..QVREMH Splice@chr   | 3.93E-10 | 0.004552 |
| 11Nov2011 | 2754  | 615.8   | -16.0827 | 2 _..QLEISFDI Splice@chr | 1.69E-10 | 0.001894 |
| 11Nov2011 | 11211 | 625.82  | -11.1921 | 2 I.QLEDIEFIS Splice@chr | 5.83E-10 | 0.007783 |
| 11Nov2011 | 666   | 722.35  | 3.723    | 1 R.FQGGGEI chr1@2595    | 3.38E-10 | 0.003469 |
| 11Nov2011 | 24572 | 792.16  | -5.99938 | 4 K.SGTIFDNI Splice@chr  | 1.15E-15 | 0        |
| 11Nov2011 | 12836 | 1345.63 | -24.7692 | 2 _..QVREMH Splice@chr   | 4.03E-10 | 0.00463  |
| 11Nov2011 | 12090 | 781.41  | -6.726   | 2 K.ALEKEDIF chr1@1462   | 3.73E-12 | 0        |
| 11Nov2011 | 7885  | 493.78  | -11.3951 | 2 R.KNQENLI Splice@chr   | 2.78E-10 | 0.002979 |
| 11Nov2011 | 22559 | 665.37  | -26.6417 | 2 Q.INNK+14 Splice@chr   | 1.94E-10 | 0.002319 |
| 11Nov2011 | 18109 | 833.92  | -21.2254 | 2 _..IIEPYVAV Splice@chr | 7.56E-12 | 1.05E-04 |
| 11Nov2011 | 23206 | 1003.19 | 17.13413 | 3 R.CWNRRA Splice@chr    | 3.28E-12 | 0        |
| 11Nov2011 | 18195 | 774.96  | 16.29715 | 2 E.DILFVINK Splice@chr  | 2.49E-11 | 4.00E-04 |

|           |       |         |          |                         |          |          |
|-----------|-------|---------|----------|-------------------------|----------|----------|
| 11Nov2011 | 3695  | 412.23  | 25.3069  | 2 R.IASYQGG chrX@1679   | 8.01E-11 | 0.00205  |
| 11Nov2011 | 17942 | 719.38  | 14.92317 | 2 R.FTQAGSE Splice@chr  | 1.09E-11 | 8.20E-05 |
| 11Nov2011 | 928   | 723.35  | -0.92778 | 1 R.FQGGGEI chr1@2595   | 4.61E-10 | 0.009278 |
| 11Nov2011 | 28537 | 962.8   | 19.96909 | 3 _GCSIVPIS Splice@chr  | 8.60E-11 | 0.002193 |
| 11Nov2011 | 26844 | 957.17  | 27.23636 | 3 K.LFQVLQN Splice@chr  | 1.54E-10 | 0.003537 |
| 11Nov2011 | 15921 | 671.37  | -24.0361 | 2 T.FNIVHTQ Splice@chr  | 3.23E-10 | 0.007007 |
| 11Nov2011 | 25664 | 1003.19 | 17.13413 | 3 R.CWNRRA Splice@chr   | 1.33E-11 | 1.59E-04 |
| 11Nov2011 | 5450  | 433.76  | 2.609238 | 2 _IVDLPGPI chr3@1104   | 1.55E-10 | 0.003598 |
| 11Nov2011 | 15494 | 1146.07 | 17.51893 | 2 K.VIGIQEYI Splice@chr | 3.39E-10 | 0.007191 |
| 11Nov2011 | 10051 | 559.79  | 11.35993 | 2 R.DGWSIGI chr4@4255   | 4.88E-10 | 0.009767 |
| 11Nov2011 | 23971 | 1216.58 | -19.8654 | 2 L.RNTRNDI chr4@1012   | 4.72E-10 | 0.009452 |
| 11Nov2011 | 10344 | 566.31  | 21.45326 | 2 R.EVAQLEC chr5@1706   | 1.10E-10 | 0.002735 |
| 11Nov2011 | 9897  | 1161.66 | -19.4191 | 1 K.NSKDKLV chr5@1250   | 2.54E-10 | 0.005725 |
| 11Nov2011 | 440   | 722.35  | 3.723    | 1 R.FQGGGEI chr1@2595   | 3.38E-10 | 0.007191 |
| 11Nov2011 | 12560 | 565.83  | 14.11658 | 2 R.ISLTNANI chr5@7795  | 4.21E-10 | 0.008851 |
| 11Nov2011 | 3949  | 1059.53 | -27.0998 | 1 _YDHKNAI chr5@1738    | 1.89E-11 | 2.39E-04 |
| 11Nov2011 | 7013  | 1107.56 | -21.6943 | 1 _SSLDKESC chr5@1239   | 1.38E-11 | 1.59E-04 |
| 11Nov2011 | 10106 | 559.79  | 11.35993 | 2 R.DGWSIGI chr4@4255   | 2.95E-11 | 5.43E-04 |
| 11Nov2011 | 16697 | 717.89  | 18.98652 | 2 R.LNIAMN\ Splice@chr  | 3.16E-10 | 0.006741 |
| 11Nov2011 | 6958  | 1107.56 | -21.6943 | 1 _SSLDKESC chr5@1239   | 1.63E-11 | 1.59E-04 |
| 11Nov2011 | 10286 | 566.31  | 21.45326 | 2 R.EVAQLEC chr5@1706   | 6.35E-11 | 0.001486 |
| 11Nov2011 | 14893 | 691.85  | 23.12212 | 2 _M+15.99 chr5@1026    | 4.87E-10 | 0.009707 |
| 11Nov2011 | 12543 | 1130.65 | 12.16972 | 1 R.ISLTNANI chr5@7795  | 3.70E-10 | 0.007568 |
| 11Nov2011 | 27388 | 741.88  | -12.6527 | 2 K.KIFLQM+ chr2@1507   | 4.61E-10 | 0.009278 |
| 11Nov2011 | 6137  | 741.38  | -23.1647 | 2 K.FPENRHI\ chr2@1477  | 2.58E-10 | 0.005784 |
| 11Nov2011 | 5319  | 537.79  | -24.2187 | 2 K.DQGMLN chr5@2025    | 4.92E-10 | 0.009831 |
| 11Nov2011 | 17828 | 719.38  | 14.92317 | 2 R.FTQAGSE Splice@chr  | 9.29E-14 | 0        |
| 11Nov2011 | 616   | 702.38  | 2.001521 | 1 _DAAGLAC chr3@2528    | 1.29E-11 | 1.59E-04 |
| 11Nov2011 | 25496 | 1385.75 | 14.42536 | 1 K.FQNFAQI chr2@2226   | 2.98E-10 | 0.006352 |
| 11Nov2011 | 12700 | 1130.65 | 12.16972 | 1 R.ISLTNANI chr5@7795  | 2.38E-10 | 0.005388 |
| 11Nov2011 | 9594  | 1025.61 | -11.6755 | 1 K.LGLGSGI chr5@4945   | 7.67E-12 | 0        |
| 11Nov2011 | 1177  | 503.26  | 2.921613 | 2 K.KNGGEM chr4@8235    | 1.78E-10 | 0.004351 |
| 11Nov2011 | 10436 | 1064.58 | -2.00842 | 1 K.YLINGNEI chr1@8687  | 7.91E-11 | 0.00205  |
| 11Nov2011 | 6191  | 741.38  | -23.1647 | 2 K.FPENRHI\ chr2@1477  | 1.96E-10 | 0.0046   |
| 11Nov2011 | 3846  | 928.48  | 5.067247 | 1 K.FRSHPER chr5@3821   | 3.50E-10 | 0.007378 |
| 11Nov2011 | 15870 | 851.49  | -3.4814  | 2 K.RGVRLSH chr2@2785   | 1.46E-10 | 0.003537 |
| 11Nov2011 | 20919 | 971.53  | -6.91774 | 2 R.KKECGDK chr3@1197   | 3.85E-10 | 0.008011 |
| 11Nov2011 | 17880 | 719.38  | 14.92317 | 2 R.FTQAGSE Splice@chr  | 4.40E-13 | 0        |
| 11Nov2011 | 3896  | 1059.54 | -17.6437 | 1 _YDHKNAI chr5@1738    | 4.00E-11 | 8.32E-04 |
| 11Nov2011 | 25475 | 1384.75 | 16.84983 | 1 K.FQNFAQI chr2@2226   | 2.51E-10 | 0.005657 |
| 11Nov2011 | 3645  | 412.23  | 25.3069  | 2 R.IASYQGG chrX@1679   | 8.18E-11 | 0.00205  |
| 11Nov2011 | 12645 | 1130.65 | 12.16972 | 1 R.ISLTNANI chr5@7795  | 2.38E-10 | 0.005388 |
| 11Nov2011 | 28303 | 1000.51 | -15.4866 | 2 E.CLVVNLS\ Splice@chr | 2.93E-10 | 0.006222 |
| 11Nov2011 | 12877 | 499.28  | 5.144758 | 2 _VYNIYVAI chrX@1610   | 4.43E-10 | 0.009163 |
| 11Nov2011 | 12610 | 565.83  | 14.11658 | 2 R.ISLTNANI chr5@7795  | 1.79E-10 | 0.004412 |
| 11Nov2011 | 10492 | 1064.58 | -2.00842 | 1 K.YLINGNEI chr1@8687  | 4.28E-11 | 8.32E-04 |
| 11Nov2011 | 622   | 703.38  | -2.78167 | 1 _DAAGLAC chr3@2528    | 5.12E-12 | 0        |

|           |       |         |          |                          |          |          |
|-----------|-------|---------|----------|--------------------------|----------|----------|
| 11Nov2011 | 7042  | 1107.56 | -21.6943 | 1 _..SSLDKES( chr5@1239  | 3.64E-11 | 3.12E-04 |
| 11Nov2011 | 5353  | 537.8   | -5.57144 | 2 K.DQGMLN chr5@2023     | 3.03E-10 | 0.00573  |
| 11Nov2011 | 3663  | 412.23  | 25.3069  | 2 R.IASYQGG chrX@1679    | 4.60E-11 | 5.38E-04 |
| 11Nov2011 | 2989  | 439.74  | 18.7116  | 2 R.SIAMFGP chr2@4157    | 2.87E-11 | 2.36E-04 |
| 11Nov2011 | 12357 | 1130.64 | 3.300733 | 1 R.ISLTNANI chr5@7793   | 1.13E-10 | 0.002051 |
| 11Nov2011 | 23008 | 809.11  | 19.47063 | 3 _..AKNATKY chr1@3095   | 1.36E-12 | 0        |
| 11Nov2011 | 9750  | 677.34  | -8.57314 | 2 K.MQQFST chr5@2080     | 1.12E-10 | 0.001979 |
| 11Nov2011 | 5655  | 761.4   | -7.95414 | 1 _..NPISAMK chrX@8094   | 2.32E-10 | 0.004558 |
| 11Nov2011 | 25023 | 1385.75 | 14.42536 | 1 K.FQNFAQI chr2@2226    | 4.60E-10 | 0.009191 |
| 11Nov2011 | 19090 | 664.7   | 1.197202 | 3 _..PTLNK+1. chr1@6526  | 2.03E-10 | 0.00403  |
| 11Nov2011 | 12026 | 625.82  | -20.2839 | 2 R.K+14.016 chrX@1356   | 4.02E-10 | 0.008095 |
| 11Nov2011 | 18032 | 623.03  | -18.2266 | 3 P.RNWGKC chrX@1446     | 2.93E-10 | 0.005604 |
| 11Nov2011 | 19513 | 833.42  | -19.2103 | 2 _..IIEPYVAV Splice@chr | 1.66E-10 | 0.003209 |
| 11Nov2011 | 7106  | 463.77  | 1.18704  | 2 K.PVNIENLI chrX@1210   | 1.29E-10 | 0.002545 |
| 11Nov2011 | 10201 | 566.31  | 21.45326 | 2 R.EVAQLEC chr5@1706    | 5.89E-11 | 0.001137 |
| 11Nov2011 | 10039 | 559.79  | 11.35993 | 2 R.DGWSIG( chr4@4253    | 1.71E-10 | 0.003209 |
| 11Nov2011 | 433   | 722.35  | 3.723    | 1 R.FQGGGEI chr1@2595    | 4.48E-10 | 0.008796 |
| 11Nov2011 | 17582 | 719.39  | 28.86707 | 2 R.FTQAGSE Splice@chr   | 2.99E-13 | 0        |
| 11Nov2011 | 26939 | 975.81  | -5.15613 | 3 K.SGTIFDNI Splice@chr  | 2.77E-12 | 0        |
| 11Nov2011 | 3043  | 439.74  | 18.7116  | 2 R.SIAMFGP chr2@4157    | 6.03E-11 | 0.001137 |
| 11Nov2011 | 19568 | 833.42  | -19.2103 | 2 _..IIEPYVAV Splice@chr | 2.82E-10 | 0.005201 |
| 11Nov2011 | 17632 | 719.39  | 28.86707 | 2 R.FTQAGSE Splice@chr   | 1.55E-13 | 0        |
| 11Nov2011 | 26419 | 957.5   | 1.956888 | 3 R.FIEPIEDIF Splice@chr | 2.37E-10 | 0.004558 |
| 11Nov2011 | 27408 | 1216.59 | -11.6275 | 2 L.RNTRNDI chr4@1012    | 3.67E-10 | 0.007043 |
| 11Nov2011 | 27872 | 980.48  | -7.04314 | 3 K.SGTIFDNI Splice@chr  | 6.43E-12 | 0        |
| 11Nov2011 | 6987  | 1107.56 | -21.6943 | 1 _..SSLDKES( chr5@1239  | 9.81E-12 | 0        |
| 11Nov2011 | 12500 | 1130.65 | 12.16972 | 1 R.ISLTNANI chr5@7793   | 1.99E-10 | 0.003961 |
| 11Nov2011 | 24386 | 665.37  | -26.6417 | 2 Q.INNK+14 Splice@chr   | 3.82E-10 | 0.007503 |
| 11Nov2011 | 12454 | 565.83  | 14.11658 | 2 R.ISLTNANI chr5@7793   | 2.10E-10 | 0.004228 |
| 11Nov2011 | 12450 | 1130.65 | 12.16972 | 1 R.ISLTNANI chr5@7793   | 2.71E-10 | 0.005139 |
| 11Nov2011 | 9984  | 559.79  | 11.35993 | 2 R.DGWSIG( chr4@4253    | 3.94E-10 | 0.007898 |
| 11Nov2011 | 610   | 703.38  | -2.78167 | 1 _..DAAGLAC chr3@2528   | 5.12E-12 | 0        |
| 11Nov2011 | 6154  | 741.38  | -23.1647 | 2 K.FPENRHI chr2@1477    | 2.46E-10 | 0.004755 |
| 11Nov2011 | 25012 | 1384.74 | 9.615872 | 1 K.FQNFAQI chr2@2226    | 3.96E-10 | 0.007898 |
| 11Nov2011 | 11972 | 625.82  | -20.2839 | 2 R.K+14.016 chrX@1356   | 3.17E-10 | 0.005921 |
| 11Nov2011 | 16386 | 717.88  | 5.023339 | 2 R.LNIAMN\ Splice@chr   | 4.39E-10 | 0.008329 |
| 11Nov2011 | 23501 | 1216.58 | -19.8654 | 2 L.RNTRNDI chr4@1012    | 4.95E-10 | 0.009956 |
| 11Nov2011 | 12401 | 1130.65 | 12.16972 | 1 R.ISLTNANI chr5@7793   | 4.14E-10 | 0.008137 |
| 11Nov2011 | 12406 | 565.83  | 14.11658 | 2 R.ISLTNANI chr5@7793   | 2.93E-10 | 0.005604 |
| 11Nov2011 | 27814 | 1000.51 | -15.4866 | 2 E.CLVVNLS Splice@chr   | 4.20E-10 | 0.008137 |
| 11Nov2011 | 10333 | 1064.59 | 7.411911 | 1 K.YLINGNEI chr1@8687   | 1.19E-10 | 0.00219  |
| 11Nov2011 | 12362 | 565.83  | 14.11658 | 2 R.ISLTNANI chr5@7793   | 4.12E-10 | 0.008137 |
| 11Nov2011 | 3938  | 1059.54 | -17.6437 | 1 _..YDHKNAI chr5@1738   | 1.33E-10 | 0.002686 |
| 11Nov2011 | 920   | 722.35  | 3.723    | 1 R.FQGGGEI chr1@2595    | 3.33E-10 | 0.006041 |
| 11Nov2011 | 1732  | 403.23  | 10.8661  | 2 R.AMVASG chr5@1721     | 1.04E-10 | 0.001909 |
| 11Nov2011 | 9691  | 677.34  | -8.57314 | 2 K.MQQFST chr5@2080     | 1.83E-10 | 0.003553 |
| 11Nov2011 | 20303 | 1034.57 | -2.45085 | 2 K.FK+14.01 Splice@chr  | 1.60E-11 | 0        |

|           |       |         |          |                          |          |          |
|-----------|-------|---------|----------|--------------------------|----------|----------|
| 11Nov2011 | 27973 | 1123.27 | 4.00827  | 3 R.REGVLNF Splice@chr   | 3.10E-10 | 0.005794 |
| 11Nov2011 | 27835 | 1000.51 | -15.4866 | 2 E.CLVVNLS Splice@chr   | 1.50E-10 | 0.002946 |
| 11Nov2011 | 10384 | 1064.58 | -2.00842 | 1 K.YLINGNEI chr1@8687   | 8.74E-11 | 0.001636 |
| 11Nov2011 | 603   | 702.38  | 2.001521 | 1 _DAAGLAC chr3@2528     | 5.12E-12 | 0        |
| 11Nov2011 | 10267 | 566.31  | 21.45326 | 2 R.EVAQLEC chr5@1706    | 7.21E-11 | 0.001198 |
| 11Nov2011 | 21700 | 804.91  | 25.79416 | 2 _LTMTWN chr1@4513      | 2.85E-10 | 0.005267 |
| 11Nov2011 | 20762 | 849.93  | 18.38221 | 2 Q.DSSYFVE Splice@chr   | 5.72E-11 | 0.001066 |
| 11Nov2011 | 13474 | 565.83  | 14.11658 | 2 R.ISLTNANI chr5@7793   | 4.28E-10 | 0.008055 |
| 11Nov2011 | 11317 | 1063.58 | 1.14882  | 1 K.YLINGNEI chr1@8687   | 2.97E-10 | 0.005683 |
| 11Nov2011 | 11579 | 1086.01 | 9.000639 | 2 V.CLTEEGK Splice@chr   | 4.87E-12 | 1.96E-04 |
| 11Nov2011 | 12052 | 724.34  | 5.400383 | 3 V.CLTEEGK Splice@chr   | 1.39E-13 | 0        |
| 11Nov2011 | 25683 | 1216.58 | -19.8654 | 2 L.RNTRNDI chr4@1012    | 3.56E-10 | 0.006551 |
| 11Nov2011 | 3252  | 795.47  | -12.9834 | 1 K.LMLPPPK Splice@chr   | 5.17E-10 | 0.008994 |
| 11Nov2011 | 11150 | 566.31  | 21.45326 | 2 R.EVAQLEC chr5@1706    | 6.00E-11 | 0.001471 |
| 11Nov2011 | 30891 | 954.46  | 24.98958 | 4 K.FAVADEE Splice@chr   | 2.15E-11 | 5.59E-04 |
| 11Nov2011 | 7744  | 463.77  | 1.18704  | 2 K.PVNIENLI chrX@1210   | 7.60E-11 | 0.00163  |
| 11Nov2011 | 655   | 702.38  | 2.001521 | 1 _DAAGLAC chr3@2528     | 5.12E-12 | 1.96E-04 |
| 11Nov2011 | 24315 | 1366.17 | -16.3461 | 2 K.TAQFTTT Splice@chr   | 3.11E-11 | 6.08E-04 |
| 11Nov2011 | 15080 | 1346.12 | -11.1429 | 2 _QVREMH Splice@chr     | 4.08E-10 | 0.007594 |
| 11Nov2011 | 30941 | 954.46  | 24.98958 | 4 K.FAVADEE Splice@chr   | 3.82E-11 | 6.65E-04 |
| 11Nov2011 | 12002 | 724.35  | 19.12636 | 3 V.CLTEEGK Splice@chr   | 8.37E-12 | 1.96E-04 |
| 11Nov2011 | 12000 | 975.55  | -13.0268 | 1 K.LPKLDAYI chr4@1149   | 1.43E-10 | 0.002945 |
| 11Nov2011 | 27528 | 1384.74 | 9.615872 | 1 K.FQNFAQI chr2@2226    | 5.93E-10 | 0.009939 |
| 11Nov2011 | 22709 | 849.92  | 6.583873 | 2 Q.DSSYFVE Splice@chr   | 1.35E-12 | 0        |
| 11Nov2011 | 20800 | 664.7   | 1.197202 | 3 _PTLNK+1 chr1@6526     | 1.82E-10 | 0.003358 |
| 11Nov2011 | 30019 | 741.88  | -12.6527 | 2 K.KIFLQM+ chr2@1507    | 2.34E-10 | 0.004652 |
| 11Nov2011 | 7798  | 463.77  | 1.18704  | 2 K.PVNIENLI chrX@1210   | 7.60E-11 | 0.00163  |
| 11Nov2011 | 26980 | 849.92  | 6.583873 | 2 Q.DSSYFVE Splice@chr   | 5.19E-11 | 0.001188 |
| 11Nov2011 | 10806 | 1089.65 | -29.1532 | 1 K.KLKSMKN chr5@3701    | 9.61E-11 | 0.001962 |
| 11Nov2011 | 10634 | 677.34  | -8.57314 | 2 K.MQQFSTI chr5@2080    | 2.50E-10 | 0.004964 |
| 11Nov2011 | 13139 | 625.82  | -20.2839 | 2 R.K+14.016 chrX@1356   | 5.20E-10 | 0.008994 |
| 11Nov2011 | 30845 | 968.46  | 9.867091 | 3 _CSIRPISG Splice@chr   | 6.19E-11 | 0.001471 |
| 11Nov2011 | 11327 | 1064.58 | -2.00842 | 1 K.YLINGNEI chr1@8687   | 6.15E-11 | 0.001471 |
| 11Nov2011 | 11942 | 975.55  | -13.0268 | 1 K.LPKLDAYI chr4@1149   | 1.19E-10 | 0.002404 |
| 11Nov2011 | 10352 | 1025.61 | -11.6755 | 1 K.LGLGSGL chr5@4945    | 4.33E-12 | 6.78E-05 |
| 11Nov2011 | 22099 | 1034.57 | -2.45085 | 2 K.FK+14.01 Splice@chr  | 1.01E-11 | 2.58E-04 |
| 11Nov2011 | 35038 | 1277.67 | 3.563978 | 2 R.DGSWVIL Splice@chr   | 1.14E-13 | 0        |
| 11Nov2011 | 6808  | 741.38  | -23.1647 | 2 K.FPENRHI chr2@1477    | 2.80E-10 | 0.005475 |
| 11Nov2011 | 19157 | 719.38  | 14.92317 | 2 R.FTQAGSE Splice@chr   | 3.99E-14 | 0        |
| 11Nov2011 | 13082 | 625.82  | -20.2839 | 2 R.K+14.016 chrX@1356   | 4.58E-10 | 0.008459 |
| 11Nov2011 | 12011 | 1086.02 | 18.22629 | 2 V.CLTEEGK Splice@chr   | 3.40E-11 | 6.08E-04 |
| 11Nov2011 | 10752 | 1089.65 | -29.1532 | 1 K.KLKSMKN chr5@3701    | 2.19E-10 | 0.004108 |
| 11Nov2011 | 698   | 552.3   | 10.18569 | 2 R.TQNATAI Splice@chr   | 5.42E-11 | 0.001188 |
| 11Nov2011 | 29258 | 957.5   | 1.956888 | 3 R.FIEPIEDIF Splice@chr | 6.19E-11 | 0.001471 |
| 11Nov2011 | 24371 | 1366.17 | -16.3461 | 2 K.TAQFTTT Splice@chr   | 9.28E-11 | 0.001854 |
| 11Nov2011 | 30855 | 1272.28 | 27.03865 | 3 K.FAVADEE Splice@chr   | 1.70E-13 | 0        |
| 11Nov2011 | 3328  | 439.74  | 18.7116  | 2 R.SIAMFGP chr2@4157    | 1.22E-10 | 0.002516 |

|           |       |         |          |                         |          |          |
|-----------|-------|---------|----------|-------------------------|----------|----------|
| 11Nov2011 | 9676  | 547.79  | 14.47103 | 2 K.AISFVGGI chr2@1172  | 4.68E-10 | 0.008505 |
| 11Nov2011 | 11885 | 975.55  | -13.0268 | 1 K.LPKLDAYI chr4@1149  | 4.56E-11 | 9.57E-04 |
| 11Nov2011 | 7566  | 831.49  | -4.77706 | 1 _SIVGNLTI Splice@chr  | 3.65E-10 | 0.006816 |
| 11Nov2011 | 11272 | 1064.58 | -2.00842 | 1 K.YLINGNEI chr1@8687  | 8.98E-11 | 0.001797 |
| 11Nov2011 | 30210 | 990.01  | -7.37741 | 2 G.CSWRNG chrX@1593    | 2.61E-10 | 0.005006 |
| 11Nov2011 | 31909 | 1000.5  | -25.5062 | 2 E.CLVVNLS Splice@chr  | 3.42E-11 | 6.65E-04 |
| 11Nov2011 | 7929  | 546.78  | -19.0827 | 2 K.ETETGITC chr4@1221  | 1.02E-11 | 2.58E-04 |
| 11Nov2011 | 27707 | 1384.74 | 9.615872 | 1 K.FQNFQAI chr2@2226   | 2.00E-10 | 0.003731 |
| 11Nov2011 | 19039 | 719.39  | 28.86707 | 2 R.FTQAGSE Splice@chr  | 7.70E-13 | 0        |
| 11Nov2011 | 10535 | 559.79  | 11.35993 | 2 R.DGWSIGI chr4@4253   | 2.59E-10 | 0.005006 |
| 11Nov2011 | 26788 | 665.37  | -26.6417 | 2 Q.INNK+14 Splice@chr  | 3.18E-10 | 0.006098 |
| 11Nov2011 | 30061 | 741.88  | -12.6527 | 2 K.KIFLQM+ chr2@1507   | 1.15E-10 | 0.002404 |
| 11Nov2011 | 11617 | 724.35  | 19.12636 | 3 V.CLTEEGK Splice@chr  | 2.42E-10 | 0.004964 |
| 11Nov2011 | 21274 | 833.92  | -21.2254 | 2 _IIEPYVAV Splice@chr  | 5.97E-11 | 0.001471 |
| 11Nov2011 | 27796 | 1003.18 | 7.145987 | 3 R.CWNRRRA Splice@chr  | 2.57E-12 | 6.78E-05 |
| 11Nov2011 | 968   | 722.35  | 3.723    | 1 R.FQGGGEI chr1@2595   | 3.38E-10 | 0.006298 |
| 11Nov2011 | 5938  | 433.76  | 2.609238 | 2 _IVDLPGPI chr3@1104   | 1.11E-10 | 0.002296 |
| 11Nov2011 | 25743 | 1216.58 | -19.8654 | 2 L.RNTRNDI chr4@1012   | 4.93E-10 | 0.008647 |
| 11Nov2011 | 19096 | 719.38  | 14.92317 | 2 R.FTQAGSE Splice@chr  | 3.65E-13 | 0        |
| 11Nov2011 | 7636  | 553.78  | -10.2208 | 2 R.TASQK+1 chrX@5438   | 2.04E-10 | 0.003731 |
| 11Nov2011 | 10582 | 566.31  | 21.45326 | 2 R.EVAQLEC chr5@1706   | 1.06E-10 | 0.002315 |
| 11Nov2011 | 11458 | 1086.02 | 18.22629 | 2 V.CLTEEGK Splice@chr  | 1.32E-10 | 0.002594 |
| 11Nov2011 | 191   | 848.41  | 2.093776 | 1 R.EEAELEK chr2@4805   | 2.25E-10 | 0.003492 |
| 11Nov2011 | 24593 | 1216.58 | -19.8654 | 2 L.RNTRNDI chr4@1012   | 1.19E-10 | 0.002594 |
| 11Nov2011 | 656   | 552.8   | 7.143001 | 2 R.TQNATAI Splice@chr  | 2.41E-10 | 0.003838 |
| 11Nov2011 | 10680 | 1063.58 | 1.14882  | 1 K.YLINGNEI chr1@8687  | 3.05E-10 | 0.004554 |
| 11Nov2011 | 28789 | 741.88  | -12.6527 | 2 K.KIFLQM+ chr2@1507   | 6.57E-10 | 0.009998 |
| 11Nov2011 | 18217 | 719.39  | 28.86707 | 2 R.FTQAGSE Splice@chr  | 4.10E-13 | 0        |
| 11Nov2011 | 10730 | 1063.58 | 1.14882  | 1 K.YLINGNEI chr1@8687  | 1.88E-10 | 0.00292  |
| 11Nov2011 | 10016 | 677.34  | -8.57314 | 2 K.MQQFSTI chr5@2080   | 1.41E-10 | 0.002646 |
| 11Nov2011 | 14371 | 1345.63 | -24.7692 | 2 _QVREMH Splice@chr    | 5.63E-11 | 0.001099 |
| 11Nov2011 | 16200 | 671.37  | -24.0361 | 2 T.FNIVHTQ Splice@chr  | 2.92E-10 | 0.004389 |
| 11Nov2011 | 373   | 723.35  | -0.92778 | 1 R.FQGGGEI chr1@2595   | 6.56E-10 | 0.009886 |
| 11Nov2011 | 11429 | 975.56  | -2.75567 | 1 K.LPKLDAYI chr4@1149  | 1.94E-10 | 0.003036 |
| 11Nov2011 | 1202  | 503.28  | -21.0222 | 2 K.RSLEYIPK chr1@1227  | 1.38E-10 | 0.002594 |
| 11Nov2011 | 6284  | 741.38  | -23.1647 | 2 K.FPENRHI chr2@1477   | 4.65E-11 | 8.47E-04 |
| 11Nov2011 | 10801 | 1064.58 | -2.00842 | 1 K.YLINGNEI chr1@8687  | 7.35E-11 | 0.001404 |
| 11Nov2011 | 26452 | 1384.74 | 9.615872 | 1 K.FQNFQAI chr2@2226   | 5.56E-10 | 0.008363 |
| 11Nov2011 | 26397 | 1384.74 | 9.615872 | 1 K.FQNFQAI chr2@2226   | 2.89E-10 | 0.004333 |
| 11Nov2011 | 20399 | 774.96  | 16.29715 | 2 E.DILFVINK Splice@chr | 4.22E-11 | 7.87E-04 |
| 11Nov2011 | 5554  | 433.76  | 2.609238 | 2 _IVDLPGPI chr3@1104   | 1.51E-10 | 0.002702 |
| 11Nov2011 | 12533 | 746.36  | -23.1469 | 2 R.SYHYVAF Splice@chr  | 5.86E-11 | 0.001159 |
| 11Nov2011 | 16259 | 671.37  | -24.0361 | 2 T.FNIVHTQ Splice@chr  | 6.11E-10 | 0.009181 |
| 11Nov2011 | 10329 | 1089.65 | -29.1532 | 1 K.KLKSMKN chr5@3701   | 1.22E-10 | 0.002594 |
| 11Nov2011 | 23840 | 969.01  | -11.2595 | 2 Y.QRHVFNI Splice@chr  | 2.33E-10 | 0.003667 |
| 11Nov2011 | 12920 | 1130.65 | 12.16972 | 1 R.ISLTNANI chr5@7793  | 3.67E-10 | 0.005631 |
| 11Nov2011 | 30165 | 1000.51 | -15.4866 | 2 E.CLVVNLS Splice@chr  | 2.14E-10 | 0.0032   |

|           |       |         |          |                          |          |          |
|-----------|-------|---------|----------|--------------------------|----------|----------|
| 11Nov2011 | 7446  | 546.78  | -19.0827 | 2 K.ETETGITC chr4@1221   | 3.22E-11 | 3.99E-04 |
| 11Nov2011 | 12891 | 565.83  | 14.11658 | 2 R.ISLTNANI chr5@7795   | 5.80E-10 | 0.008745 |
| 11Nov2011 | 20352 | 833.92  | -21.2254 | 2 _..IIEPYVAV Splice@chr | 9.65E-12 | 7.06E-05 |
| 11Nov2011 | 29416 | 968.13  | 18.26018 | 3 _..GCSIVPIS Splice@chr | 1.29E-10 | 0.002594 |
| 11Nov2011 | 10167 | 1161.65 | -28.0507 | 1 K.NSKDKLV Splice@chr   | 3.66E-10 | 0.005631 |
| 11Nov2011 | 611   | 552.3   | 10.18569 | 2 R.TQNATAI Splice@chr   | 6.38E-11 | 0.001284 |
| 11Nov2011 | 25813 | 849.41  | -3.23735 | 2 Q.DSSYFVE Splice@chr   | 1.06E-10 | 0.002315 |
| 11Nov2011 | 16323 | 671.37  | -24.0361 | 2 T.FNIVHTQ Splice@chr   | 5.85E-10 | 0.008799 |
| 11Nov2011 | 21717 | 849.93  | 18.38221 | 2 Q.DSSYFVE Splice@chr   | 1.27E-11 | 2.07E-04 |
| 11Nov2011 | 9038  | 493.78  | -11.3951 | 2 R.KNQENLI Splice@chr   | 2.16E-10 | 0.0032   |
| 11Nov2011 | 6338  | 741.39  | -17.2291 | 2 K.QKSNNWH chr5@1229    | 2.58E-11 | 3.35E-04 |
| 11Nov2011 | 10392 | 559.79  | 11.35993 | 2 R.DGWSIGI chr4@4255    | 1.04E-10 | 0.002255 |
| 11Nov2011 | 7501  | 546.78  | -19.0827 | 2 K.ETETGITC chr4@1221   | 7.69E-11 | 0.001466 |
| 11Nov2011 | 10338 | 559.79  | 11.35993 | 2 R.DGWSIGI chr4@4255    | 1.54E-10 | 0.002702 |
| 11Nov2011 | 19932 | 664.7   | 1.197202 | 3 _..PTLNK+1. chr1@6526  | 3.77E-10 | 0.005913 |
| 11Nov2011 | 20409 | 833.92  | -21.2254 | 2 _..IIEPYVAV Splice@chr | 1.87E-11 | 2.73E-04 |
| 11Nov2011 | 19869 | 664.7   | 1.197202 | 3 _..PTLNK+1. chr1@6526  | 1.87E-10 | 0.00292  |
| 11Nov2011 | 28011 | 957.5   | 1.956888 | 3 R.FIEPIEDIF Splice@chr | 3.87E-10 | 0.00602  |
| 11Nov2011 | 558   | 702.38  | 2.001521 | 1 _..DAAGLAC chr3@2528   | 5.12E-12 | 0        |
| 11Nov2011 | 12468 | 746.36  | -23.1469 | 2 R.SYHYVAF Splice@chr   | 5.20E-11 | 9.09E-04 |
| 11Nov2011 | 10690 | 1064.58 | -2.00842 | 1 K.YLINGNEI chr1@8687   | 9.18E-11 | 0.001703 |
| 11Nov2011 | 4080  | 1059.54 | -17.6437 | 1 _..YDHKNAI chr5@1738   | 3.57E-11 | 4.63E-04 |
| 11Nov2011 | 8675  | 434.24  | 13.9946  | 3 _..RSNDQTI chr5@6378   | 2.03E-10 | 0.003086 |
| 11Nov2011 | 669   | 552.3   | 10.18569 | 2 R.TQNATAI Splice@chr   | 2.85E-10 | 0.004333 |
| 11Nov2011 | 12845 | 565.83  | 14.11658 | 2 R.ISLTNANI chr5@7795   | 3.55E-10 | 0.0054   |
| 11Nov2011 | 24722 | 1216.59 | -11.6275 | 2 L.RNTRNDI chr4@1012    | 2.29E-10 | 0.003609 |
| 11Nov2011 | 10740 | 1064.58 | -2.00842 | 1 K.YLINGNEI chr1@8687   | 6.63E-11 | 0.001347 |
| 11Nov2011 | 9899  | 1025.61 | -11.6755 | 1 K.LGLGSGI chr5@4945    | 1.97E-11 | 2.73E-04 |
| 11Nov2011 | 28751 | 741.88  | -12.6527 | 2 K.KIFLQM+ chr2@1507    | 2.55E-10 | 0.003936 |
| 11Nov2011 | 706   | 552.3   | 10.18569 | 2 R.TQNATAI Splice@chr   | 1.50E-10 | 0.002702 |
| 11Nov2011 | 7060  | 519.6   | -26.5197 | 3 K.IGSM+15 chr5@1654    | 2.00E-10 | 0.003086 |
| 11Nov2011 | 18270 | 719.39  | 28.86707 | 2 R.FTQAGSE Splice@chr   | 1.34E-13 | 0        |
| 11Nov2011 | 18331 | 719.39  | 28.86707 | 2 R.FTQAGSE Splice@chr   | 1.34E-13 | 0        |
| 11Nov2011 | 11572 | 1086.01 | 9.000639 | 2 V.CLTEEGK Splice@chr   | 1.24E-11 | 3.05E-04 |
| 11Nov2011 | 15722 | 1075.05 | -16.1169 | 2 R.TCSK+14. chr2@1255   | 8.62E-11 | 0.002079 |
| 11Nov2011 | 22909 | 849.92  | 6.583873 | 2 Q.DSSYFVE Splice@chr   | 3.88E-11 | 9.94E-04 |
| 11Nov2011 | 32464 | 1000.5  | -25.5062 | 2 E.CLVVNLS Splice@chr   | 1.01E-10 | 0.002397 |
| 11Nov2011 | 9237  | 563.01  | -10.7516 | 4 R.WNDEDS chrX@1539     | 6.31E-10 | 0.00989  |
| 11Nov2011 | 27832 | 1384.74 | 9.615872 | 1 K.FQNFAQI chr2@2226    | 5.14E-10 | 0.008605 |
| 11Nov2011 | 15169 | 897.42  | -27.6753 | 3 _..QVREMH Splice@chr   | 5.45E-10 | 0.009142 |
| 11Nov2011 | 19256 | 719.38  | 14.92317 | 2 R.FTQAGSE Splice@chr   | 2.01E-13 | 0        |
| 11Nov2011 | 6802  | 741.38  | -23.1647 | 2 K.FPENRHI, chr2@1477   | 3.60E-10 | 0.006185 |
| 11Nov2011 | 11341 | 1063.58 | 1.14882  | 1 K.YLINGNEI chr1@8687   | 4.68E-10 | 0.007914 |
| 11Nov2011 | 32386 | 1000.5  | -25.5062 | 2 E.CLVVNLS Splice@chr   | 6.00E-10 | 0.009711 |
| 11Nov2011 | 10732 | 1161.66 | -19.4191 | 1 K.NSKDKLV chr5@1250    | 2.30E-10 | 0.004553 |
| 11Nov2011 | 35676 | 1277.17 | 4.878389 | 2 R.DGSWWII Splice@chr   | 7.09E-11 | 0.001813 |
| 11Nov2011 | 27239 | 849.41  | -3.23735 | 2 Q.DSSYFVE Splice@chr   | 1.84E-10 | 0.003793 |

|           |       |         |          |                          |          |          |
|-----------|-------|---------|----------|--------------------------|----------|----------|
| 11Nov2011 | 27064 | 665.37  | -26.6417 | 2 Q.INNK+14 Splice@chr   | 3.37E-10 | 0.006042 |
| 11Nov2011 | 5985  | 433.76  | 2.609238 | 2 _..IVDLP GPI chr3@1104 | 7.91E-11 | 0.001973 |
| 11Nov2011 | 4152  | 418.89  | -10.5715 | 3 R.ENFATKC chr5@5231    | 2.53E-10 | 0.004899 |
| 11Nov2011 | 929   | 403.23  | 10.8661  | 2 R.AMVASG chr5@1721     | 1.44E-11 | 3.05E-04 |
| 11Nov2011 | 28059 | 1003.18 | 7.145987 | 3 R.CWNRRRA Splice@chr   | 2.00E-12 | 6.87E-05 |
| 11Nov2011 | 615   | 702.38  | 2.001521 | 1 _..DAAGLAC chr3@2528   | 5.12E-12 | 1.29E-04 |
| 11Nov2011 | 11597 | 724.34  | 5.400383 | 3 V.CLTEEGK Splice@chr   | 1.64E-11 | 3.05E-04 |
| 11Nov2011 | 426   | 403.23  | 10.8661  | 2 R.AMVASG chr5@1721     | 3.81E-10 | 0.006589 |
| 11Nov2011 | 427   | 722.34  | -10.069  | 1 R.FQGGGEI chr1@2595    | 3.38E-10 | 0.006042 |
| 11Nov2011 | 12063 | 1086.51 | 7.454643 | 2 V.CLTEEGK Splice@chr   | 4.58E-11 | 0.001213 |
| 11Nov2011 | 4358  | 1059.53 | -27.0998 | 1 _..YDHKNAI chr5@1738   | 1.22E-10 | 0.002867 |
| 11Nov2011 | 9760  | 696.37  | -15.3603 | 2 _..LPTSPIGC chr5@1204  | 4.51E-10 | 0.007778 |
| 11Nov2011 | 13112 | 625.82  | -11.1921 | 2 I.QLEDIEFIS Splice@chr | 2.64E-10 | 0.004991 |
| 11Nov2011 | 11545 | 724.34  | 5.400383 | 3 V.CLTEEGK Splice@chr   | 1.46E-10 | 0.003488 |
| 11Nov2011 | 27719 | 890.43  | 3.605981 | 2 K.GWSVPLI Splice@chr   | 9.23E-11 | 0.002185 |
| 11Nov2011 | 27723 | 1385.74 | 7.1914   | 1 K.FQNFAQI chr2@2226    | 5.01E-11 | 0.00127  |
| 11Nov2011 | 30400 | 741.88  | -12.6527 | 2 K.KIFLQM+ chr2@1507    | 2.11E-10 | 0.004144 |
| 11Nov2011 | 11175 | 566.31  | 21.45326 | 2 R.EVAQLEC chr5@1706    | 4.00E-11 | 0.001051 |
| 11Nov2011 | 11998 | 724.34  | 5.400383 | 3 V.CLTEEGK Splice@chr   | 3.16E-13 | 0        |
| 11Nov2011 | 21811 | 1090.53 | -18.1295 | 2 K.INGVTVA chr3@6296    | 2.96E-10 | 0.005551 |
| 11Nov2011 | 7595  | 553.78  | -10.2208 | 2 R.TASQK+1 chrX@5438    | 2.85E-10 | 0.005347 |
| 11Nov2011 | 31256 | 791.9   | -17.5179 | 4 K.SGTIFDNI Splice@chr  | 1.93E-17 | 0        |
| 11Nov2011 | 252   | 847.41  | 6.057386 | 1 R.EEAELEK. chr2@4805   | 4.58E-10 | 0.007822 |
| 11Nov2011 | 22839 | 849.92  | 6.583873 | 2 Q.DSSYFVE Splice@chr   | 2.17E-12 | 1.29E-04 |
| 11Nov2011 | 11349 | 1064.58 | -2.00842 | 1 K.YLINGNEI chr1@8687   | 1.60E-10 | 0.003488 |
| 11Nov2011 | 32425 | 1000.5  | -25.5062 | 2 E.CLVVNLS' Splice@chr  | 9.25E-11 | 0.002185 |
| 11Nov2011 | 12004 | 1086.01 | 9.000639 | 2 V.CLTEEGK Splice@chr   | 7.25E-11 | 0.001867 |
| 11Nov2011 | 13171 | 625.82  | -20.2839 | 2 R.K+14.016 chrX@1356   | 5.44E-10 | 0.009142 |
| 11Nov2011 | 5929  | 433.76  | 2.609238 | 2 _..IVDLP GPI chr3@1104 | 1.91E-10 | 0.003835 |
| 11Nov2011 | 10836 | 1089.65 | -29.1532 | 1 K.KLKSMKN chr5@3701    | 2.12E-10 | 0.00425  |
| 11Nov2011 | 7562  | 831.49  | -4.77706 | 1 _..SIVGNLT Splice@chr  | 2.65E-10 | 0.004991 |
| 11Nov2011 | 11407 | 1063.58 | 1.14882  | 1 K.YLINGNEI chr1@8687   | 5.32E-10 | 0.00895  |
| 11Nov2011 | 10639 | 677.34  | -8.57314 | 2 K.MQQFST chr5@2080     | 3.77E-10 | 0.006486 |
| 11Nov2011 | 6752  | 741.38  | -23.1647 | 2 K.FPENRHI, chr2@1477   | 2.54E-10 | 0.004899 |
| 11Nov2011 | 19316 | 719.38  | 14.92317 | 2 R.FTQAGSE Splice@chr   | 3.43E-13 | 0        |
| 11Nov2011 | 34539 | 1114.09 | -18.2942 | 2 _..TVLQTAC chr5@1395   | 3.59E-10 | 0.006185 |
| 11Nov2011 | 12050 | 724.34  | 5.400383 | 3 V.CLTEEGK Splice@chr   | 4.05E-12 | 1.29E-04 |
| 11Nov2011 | 7732  | 463.77  | 1.18704  | 2 K.PVNIENLI chrX@1210   | 7.60E-11 | 0.00192  |
| 11Nov2011 | 3289  | 1065.51 | -21.5582 | 1 K.FNNSEKA Splice@chr   | 5.02E-10 | 0.008406 |
| 11Nov2011 | 13512 | 565.83  | 14.11658 | 2 R.ISLTNANI chr5@7795   | 5.72E-10 | 0.009517 |
| 11Nov2011 | 31238 | 968.13  | 18.26018 | 3 _..GCSIVPIS Splice@chr | 3.02E-10 | 0.005705 |
| 11Nov2011 | 12020 | 975.55  | -13.0268 | 1 K.LPKLDAYI chr4@1149   | 1.07E-10 | 0.002555 |
| 11Nov2011 | 7962  | 546.78  | -19.0827 | 2 K.ETETGITC chr4@1221   | 2.41E-10 | 0.004807 |
| 11Nov2011 | 21420 | 833.92  | -21.2254 | 2 _..IIEPYVAV Splice@chr | 3.66E-11 | 8.20E-04 |
| 11Nov2011 | 4112  | 412.23  | 25.3069  | 2 R.IASYQGG chrX@1679    | 7.46E-11 | 0.00192  |
| 11Nov2011 | 7674  | 1107.56 | -21.6943 | 1 _..SSLDKESC chr5@1239  | 6.11E-11 | 0.001486 |
| 11Nov2011 | 33943 | 1147.24 | 4.705638 | 3 R.FQSAAIG Splice@chr   | 1.05E-15 | 0        |

|           |       |         |          |                         |          |          |
|-----------|-------|---------|----------|-------------------------|----------|----------|
| 11Nov2011 | 11962 | 975.55  | -13.0268 | 1 K.LPKLDAYI chr4@1149  | 1.20E-10 | 0.002867 |
| 11Nov2011 | 13463 | 565.83  | 14.11658 | 2 R.ISLTNANI chr5@7793  | 3.29E-10 | 0.005945 |
| 11Nov2011 | 255   | 848.41  | 2.093776 | 1 R.EEAELEK. chr2@4805  | 2.25E-10 | 0.004451 |
| 11Nov2011 | 35646 | 1277.68 | 11.40766 | 2 R.DGSWVII Splice@chr  | 1.78E-13 | 0        |
| 11Nov2011 | 21456 | 774.96  | 16.29715 | 2 E.DILFVINK Splice@chr | 4.24E-11 | 0.001162 |
| 11Nov2011 | 9685  | 547.79  | 14.47103 | 2 K.AISFVGGI chr2@1172  | 8.32E-11 | 0.002079 |
| 11Nov2011 | 10784 | 1089.65 | -29.1532 | 1 K.KLKSMKN chr5@3701   | 1.22E-10 | 0.002867 |
| 11Nov2011 | 22207 | 1034.57 | -2.45085 | 2 K.FK+14.01 Splice@chr | 1.63E-11 | 3.05E-04 |
| 11Nov2011 | 25036 | 969.01  | -11.2595 | 2 Y.QRHVFNI Splice@chr  | 6.24E-11 | 0.001541 |
| 11Nov2011 | 7906  | 546.78  | -19.0827 | 2 K.ETETGITC chr4@1221  | 4.24E-11 | 0.001162 |
| 11Nov2011 | 19205 | 719.38  | 14.92317 | 2 R.FTQAGSE Splice@chr  | 8.54E-14 | 0        |
| 11Nov2011 | 26002 | 1216.58 | -19.8654 | 2 L.RNTRNDI chr4@1012   | 4.40E-10 | 0.00753  |
| 11Nov2011 | 31292 | 954.46  | 24.98958 | 4 K.FAVADEE Splice@chr  | 8.05E-12 | 1.87E-04 |
| 11Nov2011 | 11294 | 1064.58 | -2.00842 | 1 K.YLINGNEI chr1@8687  | 8.70E-11 | 0.002079 |
| 11Nov2011 | 7784  | 463.77  | 1.18704  | 2 K.PVNIENLI chrX@1210  | 1.27E-10 | 0.00292  |
| 11Nov2011 | 7538  | 546.78  | -19.0827 | 2 K.ETETGITC chr4@1221  | 3.39E-11 | 6.42E-04 |
| 11Nov2011 | 26970 | 1003.52 | 12.6889  | 3 R.CWNRRA Splice@chr   | 2.59E-11 | 3.90E-04 |
| 11Nov2011 | 10509 | 1089.65 | -29.1532 | 1 K.KLKSMKN chr5@3701   | 1.90E-10 | 0.003461 |
| 11Nov2011 | 499   | 702.38  | 2.001521 | 1 _DAAGLAC chr3@2528    | 5.12E-12 | 0        |
| 11Nov2011 | 11539 | 724.35  | 19.12636 | 3 V.CLTEEGK Splice@chr  | 2.52E-11 | 3.90E-04 |
| 11Nov2011 | 689   | 552.3   | 10.18569 | 2 R.TQNATAI Splice@chr  | 6.69E-11 | 0.001546 |
| 11Nov2011 | 18329 | 719.38  | 14.92317 | 2 R.FTQAGSE Splice@chr  | 1.74E-13 | 0        |
| 11Nov2011 | 29930 | 1272.28 | 27.03865 | 3 K.FAVADEE Splice@chr  | 3.06E-11 | 5.78E-04 |
| 11Nov2011 | 20622 | 833.92  | -21.2254 | 2 _IIEPYVAM Splice@chr  | 1.36E-11 | 1.35E-04 |
| 11Nov2011 | 10786 | 1064.58 | -2.00842 | 1 K.YLINGNEI chr1@8687  | 6.46E-11 | 0.001488 |
| 11Nov2011 | 28349 | 957.5   | 22.57714 | 3 K.LFQVLQN Splice@chr  | 2.63E-10 | 0.004503 |
| 11Nov2011 | 12574 | 625.82  | -20.2839 | 2 R.K+14.016 chrX@1356  | 2.01E-10 | 0.003624 |
| 11Nov2011 | 21919 | 792.67  | 25.51992 | 4 I.SRVEDDS Splice@chr  | 1.33E-10 | 0.002746 |
| 11Nov2011 | 13013 | 565.83  | 14.11658 | 2 R.ISLTNANI chr5@7793  | 3.93E-10 | 0.006786 |
| 11Nov2011 | 16775 | 893.98  | 23.35659 | 2 K.CTHLDKT chr5@2031   | 5.70E-10 | 0.009321 |
| 11Nov2011 | 155   | 848.41  | 2.093776 | 1 R.EEAELEK. chr2@4805  | 2.25E-10 | 0.003957 |
| 11Nov2011 | 669   | 552.3   | 10.18569 | 2 R.TQNATAI Splice@chr  | 3.02E-11 | 5.78E-04 |
| 11Nov2011 | 9962  | 1025.61 | -11.6755 | 1 K.LGLGSGI chr5@4945   | 2.94E-12 | 0        |
| 11Nov2011 | 3849  | 412.23  | 25.3069  | 2 R.IASYQGG chrX@1679   | 3.11E-11 | 5.78E-04 |
| 11Nov2011 | 7274  | 463.77  | 1.18704  | 2 K.PVNIENLI chrX@1210  | 7.81E-11 | 0.001598 |
| 11Nov2011 | 5659  | 433.76  | 2.609238 | 2 _IVDLPGPI chr3@1104   | 1.00E-10 | 0.00206  |
| 11Nov2011 | 10247 | 677.34  | -8.57314 | 2 K.MQQFSTI chr5@2080   | 7.28E-11 | 0.001598 |
| 11Nov2011 | 24057 | 969.01  | -11.2595 | 2 Y.QRHVFNI Splice@chr  | 3.99E-10 | 0.006897 |
| 11Nov2011 | 24555 | 831.45  | -14.4052 | 2 K.PM+15.9 chr3@1124   | 5.04E-10 | 0.00827  |
| 11Nov2011 | 7046  | 519.6   | -26.5197 | 3 K.IGSM+15 chr5@1654   | 2.79E-11 | 4.55E-04 |
| 11Nov2011 | 15357 | 943.57  | -2.9787  | 1 _SPLFVPKI chrX@4402   | 1.79E-10 | 0.003461 |
| 11Nov2011 | 31404 | 962.8   | 19.96909 | 3 _GCSIVPIS Splice@chr  | 3.89E-10 | 0.006735 |
| 11Nov2011 | 18441 | 719.38  | 14.92317 | 2 R.FTQAGSE Splice@chr  | 1.03E-13 | 0        |
| 11Nov2011 | 23730 | 853.45  | -23.3178 | 2 K.NFKINSKI chr4@5819  | 3.44E-10 | 0.005921 |
| 11Nov2011 | 4174  | 1059.53 | -27.0998 | 1 _YDHKNAI chr5@1738    | 6.10E-11 | 0.00143  |
| 11Nov2011 | 26933 | 1188.07 | -27.4409 | 2 M.DFLNDEI chr4@1550   | 5.59E-10 | 0.009051 |
| 11Nov2011 | 29141 | 741.88  | -12.6527 | 2 K.KIFLQM+ chr2@1507   | 1.77E-10 | 0.003418 |

|           |       |         |          |                          |          |          |
|-----------|-------|---------|----------|--------------------------|----------|----------|
| 11Nov2011 | 10902 | 1063.58 | 1.14882  | 1 K.YLINGNEI chr1@8687   | 5.93E-10 | 0.00969  |
| 11Nov2011 | 10906 | 1064.58 | -2.00842 | 1 K.YLINGNEI chr1@8687   | 5.80E-10 | 0.009479 |
| 11Nov2011 | 30197 | 955.86  | 18.18234 | 3 _ .FPHTRSSI chr2@1245  | 3.49E-10 | 0.006031 |
| 11Nov2011 | 13065 | 565.83  | 14.11658 | 2 R.ISLTNANI chr5@7795   | 4.59E-10 | 0.007909 |
| 11Nov2011 | 26127 | 849.91  | -5.21446 | 2 Q.DSSYFVE Splice@chr   | 6.84E-11 | 0.001546 |
| 11Nov2011 | 26589 | 1385.75 | 14.42536 | 1 K.FQNFAQI chr2@2226    | 2.43E-10 | 0.004235 |
| 11Nov2011 | 22965 | 804.9   | 13.41057 | 2 _ .LTMTWN chr1@4515    | 1.42E-10 | 0.00279  |
| 11Nov2011 | 32769 | 1129.07 | -15.453  | 2 R.K+14.016 chr2@5339   | 3.53E-10 | 0.006197 |
| 11Nov2011 | 10668 | 566.31  | 21.45326 | 2 R.EVAQLEC chr5@1706    | 5.01E-11 | 0.00143  |
| 11Nov2011 | 26601 | 890.44  | 14.86661 | 2 K.GWSVPLI Splice@chr   | 1.59E-11 | 1.99E-04 |
| 11Nov2011 | 11085 | 1086.01 | 9.000639 | 2 V.CLTEEGK Splice@chr   | 2.70E-11 | 3.90E-04 |
| 11Nov2011 | 20917 | 1090.53 | -18.1295 | 2 K.INGVTVA chr3@6296    | 3.06E-10 | 0.005098 |
| 11Nov2011 | 20561 | 833.92  | -21.2254 | 2 _ .IIEPYVAM Splice@chr | 6.15E-12 | 0        |
| 11Nov2011 | 24885 | 1216.58 | -19.8654 | 2 L.RNTRNDI chr4@1012    | 3.75E-10 | 0.006575 |
| 11Nov2011 | 6409  | 741.38  | -23.1647 | 2 K.FPENRHI chr2@1477    | 1.06E-10 | 0.002174 |
| 11Nov2011 | 321   | 722.34  | -10.069  | 1 R.FQGGGEI chr1@2595    | 3.42E-10 | 0.005867 |
| 11Nov2011 | 10841 | 1064.58 | -2.00842 | 1 K.YLINGNEI chr1@8687   | 9.22E-11 | 0.001707 |
| 11Nov2011 | 10839 | 1063.58 | 1.14882  | 1 K.YLINGNEI chr1@8687   | 6.23E-11 | 0.00143  |
| 11Nov2011 | 6572  | 936.48  | 27.86052 | 1 K.LNGGYEC chr2@1191    | 2.71E-10 | 0.004728 |
| 11Nov2011 | 26917 | 1003.18 | 7.145987 | 3 R.CWNRRA Splice@chr    | 1.81E-11 | 1.99E-04 |
| 11Nov2011 | 9235  | 547.79  | 14.47103 | 2 K.AISFVGGI chr2@1172   | 3.43E-10 | 0.005867 |
| 11Nov2011 | 16606 | 1106.51 | -25.9146 | 1 R.M+15.99 chr5@9235    | 3.80E-10 | 0.006631 |
| 11Nov2011 | 638   | 552.3   | 10.18569 | 2 R.TQNATAI Splice@chr   | 3.07E-11 | 5.78E-04 |
| 11Nov2011 | 29890 | 968.13  | 14.47345 | 3 _ .CSIRPISG Splice@chr | 4.01E-11 | 0.00108  |
| 11Nov2011 | 11488 | 1086.01 | 9.000639 | 2 V.CLTEEGK Splice@chr   | 2.23E-11 | 3.90E-04 |
| 11Nov2011 | 11487 | 724.34  | 5.400383 | 3 V.CLTEEGK Splice@chr   | 6.23E-11 | 0.00143  |
| 11Nov2011 | 7484  | 546.78  | -19.0827 | 2 K.ETETGITC chr4@1221   | 3.75E-11 | 8.31E-04 |
| 11Nov2011 | 7170  | 553.78  | -10.2208 | 2 R.TASQK+1 chrX@5438    | 2.85E-10 | 0.004941 |
| 11Nov2011 | 20101 | 664.7   | 1.197202 | 3 _ .PTLNK+1 chr1@6526   | 4.64E-11 | 0.001325 |
| 11Nov2011 | 7330  | 463.77  | 1.18704  | 2 K.PVNIENLI chrX@1210   | 7.60E-11 | 0.001598 |
| 11Nov2011 | 18381 | 719.38  | 14.92317 | 2 R.FTQAGSE Splice@chr   | 2.08E-13 | 0        |
| 11Nov2011 | 6356  | 741.38  | -23.1647 | 2 K.FPENRHI chr2@1477    | 1.84E-10 | 0.003461 |
| 11Nov2011 | 20615 | 774.96  | 16.29715 | 2 E.DILFVINK Splice@chr  | 9.88E-12 | 6.85E-05 |
| 11Nov2011 | 6881  | 741.38  | -23.1647 | 2 K.FPENRHI chr2@1477    | 1.72E-10 | 0.00302  |
| 11Nov2011 | 7034  | 936.48  | 27.86052 | 1 K.LNGGYEC chr2@1191    | 5.58E-11 | 0.00104  |
| 11Nov2011 | 29346 | 897.45  | -3.04709 | 4 R.FWFFGKI chr2@7020    | 2.97E-10 | 0.005038 |
| 11Nov2011 | 32643 | 1000.5  | -25.5062 | 2 E.CLVVNLS Splice@chr   | 8.62E-11 | 0.001583 |
| 11Nov2011 | 28088 | 1003.18 | 7.145987 | 3 R.CWNRRA Splice@chr    | 2.90E-12 | 1.28E-04 |
| 11Nov2011 | 12104 | 975.55  | -13.0268 | 1 K.LPKLDAYI chr4@1149   | 1.53E-10 | 0.002429 |
| 11Nov2011 | 19915 | 623.03  | -18.2266 | 3 P.RNWGKC chrX@1446     | 2.94E-10 | 0.005038 |
| 11Nov2011 | 11777 | 624.33  | 9.752617 | 2 R.QHAYAVI chrX@1402    | 1.10E-11 | 1.88E-04 |
| 11Nov2011 | 34187 | 1147.24 | 4.705638 | 3 R.FQSAAIG Splice@chr   | 3.99E-16 | 0        |
| 11Nov2011 | 31548 | 954.46  | 24.98958 | 4 K.FAFADEE Splice@chr   | 3.13E-12 | 1.28E-04 |
| 11Nov2011 | 11575 | 1064.58 | -2.00842 | 1 K.YLINGNEI chr1@8687   | 1.09E-10 | 0.001679 |
| 11Nov2011 | 31463 | 1272.28 | 27.03865 | 3 K.FAFADEE Splice@chr   | 7.92E-14 | 0        |
| 11Nov2011 | 25900 | 895     | -10.9918 | 2 K.M+15.99 chrX@1449    | 1.29E-10 | 0.002002 |
| 11Nov2011 | 12280 | 1086.01 | 9.000639 | 2 V.CLTEEGK Splice@chr   | 1.21E-11 | 2.44E-04 |

|           |       |         |          |                          |          |          |
|-----------|-------|---------|----------|--------------------------|----------|----------|
| 11Nov2011 | 22340 | 1034.57 | -2.45085 | 2 K.FK+14.01 Splice@chr  | 1.01E-11 | 1.88E-04 |
| 11Nov2011 | 34169 | 860.68  | 2.433027 | 4 R.FQSAAIG Splice@chr   | 1.98E-10 | 0.003438 |
| 11Nov2011 | 16435 | 599.34  | -5.64446 | 3 _..INKFLIFK- chr4@1511 | 5.22E-10 | 0.008237 |
| 11Nov2011 | 19457 | 719.38  | 14.92317 | 2 R.FTQAGSE Splice@chr   | 5.36E-13 | 0        |
| 11Nov2011 | 4474  | 1059.53 | -27.0998 | 1 _..YDHKNAI chr5@1738   | 7.69E-11 | 0.001533 |
| 11Nov2011 | 29735 | 957.5   | 22.57714 | 3 K.LFQVLQN Splice@chr   | 3.57E-10 | 0.00595  |
| 11Nov2011 | 13695 | 565.83  | 14.11658 | 2 R.ISLTNANI chr5@7793   | 3.68E-10 | 0.006099 |
| 11Nov2011 | 11176 | 559.79  | 11.35993 | 2 R.DGWSIG( chr4@4253    | 8.60E-11 | 0.001583 |
| 11Nov2011 | 11521 | 1064.58 | -2.00842 | 1 K.YLINGNEI chr1@8687   | 7.81E-11 | 0.001533 |
| 11Nov2011 | 7700  | 831.49  | -4.77706 | 1 R.SIVGNLTI chr5@1924   | 5.50E-10 | 0.008535 |
| 11Nov2011 | 29254 | 897.45  | -3.04709 | 4 R.FWFFGKI chr2@7020    | 2.45E-10 | 0.004323 |
| 11Nov2011 | 229   | 848.41  | 2.093776 | 1 R.EEAELEK. chr2@4805   | 2.25E-10 | 0.003961 |
| 11Nov2011 | 19404 | 719.38  | 14.92317 | 2 R.FTQAGSE Splice@chr   | 3.73E-14 | 0        |
| 11Nov2011 | 10682 | 1025.61 | -11.6755 | 1 K.LGLGSGL chr5@4945    | 7.04E-12 | 1.28E-04 |
| 11Nov2011 | 21095 | 664.7   | 1.197202 | 3 _..PTLNK+1. chr1@6526  | 1.01E-10 | 0.001625 |
| 11Nov2011 | 21542 | 774.96  | 16.29715 | 2 E.DILFVINK Splice@chr  | 2.35E-11 | 2.99E-04 |
| 11Nov2011 | 13289 | 533.82  | -1.88988 | 2 K.NTVLKYT Splice@chr   | 8.28E-11 | 0.001533 |
| 11Nov2011 | 29687 | 957.5   | 1.956888 | 3 R.FIEPIEDIF Splice@chr | 4.12E-10 | 0.006598 |
| 11Nov2011 | 17722 | 893.98  | 23.35659 | 2 K.CTHLDKT chr5@2031    | 5.92E-10 | 0.009236 |
| 11Nov2011 | 33156 | 928.82  | -24.1202 | 3 R.KSTAKLK' chr2@8593   | 5.05E-11 | 9.26E-04 |
| 11Nov2011 | 30582 | 741.88  | -12.6527 | 2 K.KIFLQM+ chr2@1507    | 2.37E-10 | 0.004225 |
| 11Nov2011 | 22733 | 971.53  | -6.91774 | 2 R.KKECGDK chr3@1197    | 2.61E-10 | 0.004688 |
| 11Nov2011 | 11403 | 566.31  | 21.45326 | 2 R.EVAQLEC chr5@1706    | 7.42E-11 | 0.001483 |
| 11Nov2011 | 607   | 702.38  | 2.001521 | 1 _..DAAGLAC chr3@2528   | 5.12E-12 | 1.28E-04 |
| 11Nov2011 | 4099  | 412.23  | 25.3069  | 2 R.IASYQGG chrX@1675    | 3.05E-10 | 0.005086 |
| 11Nov2011 | 13335 | 625.82  | -20.2839 | 2 R.K+14.016 chrX@1356   | 2.04E-10 | 0.003543 |
| 11Nov2011 | 21576 | 833.92  | -21.2254 | 2 _..IIEPYVAV Splice@chr | 3.49E-12 | 1.28E-04 |
| 11Nov2011 | 34227 | 1147.25 | 13.44098 | 3 R.FQSAAIG Splice@chr   | 1.99E-13 | 0        |
| 11Nov2011 | 33641 | 722.35  | 13.4537  | 4 _..CSIRPISG Splice@chr | 3.18E-10 | 0.005447 |
| 11Nov2011 | 3406  | 439.73  | -4.03447 | 2 R.SIAMFGP chr2@4157    | 1.03E-10 | 0.001625 |
| 11Nov2011 | 19857 | 623.03  | -18.2266 | 3 P.RNWGKG chrX@1446     | 5.20E-10 | 0.008192 |
| 11Nov2011 | 31500 | 954.46  | 24.98958 | 4 K.FAVADEE Splice@chr   | 6.94E-13 | 0        |
| 11Nov2011 | 5983  | 537.79  | -24.2187 | 2 K.DQGMLN chr5@2023     | 4.17E-10 | 0.006802 |
| 11Nov2011 | 6933  | 741.38  | -23.1647 | 2 K.FPENRHI, chr2@1477   | 3.05E-11 | 4.18E-04 |
| 11Nov2011 | 26064 | 1216.58 | -19.8654 | 2 L.RNTRNDI chr4@1012    | 2.77E-10 | 0.004835 |
| 11Nov2011 | 7907  | 463.77  | 1.18704  | 2 K.PVNIENLI chrX@1210   | 2.18E-10 | 0.003861 |
| 11Nov2011 | 32405 | 911.42  | 20.49399 | 2 _..PRM+15. Splice@chr  | 2.73E-10 | 0.004835 |
| 11Nov2011 | 29643 | 957.5   | 22.57714 | 3 K.LFQVLQN Splice@chr   | 1.39E-10 | 0.002328 |
| 11Nov2011 | 35893 | 1277.17 | 4.878389 | 2 R.DGSWWIL Splice@chr   | 1.95E-14 | 0        |
| 11Nov2011 | 897   | 403.23  | 10.8661  | 2 R.AMVASG chr5@1721     | 2.28E-10 | 0.004015 |
| 11Nov2011 | 13749 | 565.83  | 14.11658 | 2 R.ISLTNANI chr5@7793   | 5.43E-10 | 0.008489 |
| 11Nov2011 | 7837  | 1107.56 | -21.6943 | 1 _..SSLDKESC chr5@1239  | 3.26E-11 | 4.75E-04 |
| 11Nov2011 | 10849 | 677.34  | -8.57314 | 2 K.MQQFSTi chr5@2080    | 2.31E-10 | 0.004175 |
| 11Nov2011 | 19357 | 719.39  | 28.86707 | 2 R.FTQAGSE Splice@chr   | 8.17E-13 | 0        |
| 11Nov2011 | 6083  | 433.76  | 2.609238 | 2 _..IVDLPGPI chr3@1104  | 1.48E-10 | 0.002378 |
| 11Nov2011 | 11078 | 1089.65 | -29.1532 | 1 K.KLKSMKN chr5@3701    | 2.03E-10 | 0.003543 |
| 11Nov2011 | 8987  | 693.87  | -6.6949  | 2 V.ICVAVGD chr5@1063    | 2.09E-10 | 0.003703 |

|           |       |         |          |                         |          |          |
|-----------|-------|---------|----------|-------------------------|----------|----------|
| 11Nov2011 | 12160 | 975.55  | -13.0268 | 1 K.LPKLDAYI chr4@1149  | 1.06E-10 | 0.001625 |
| 11Nov2011 | 22941 | 849.92  | 6.583873 | 2 Q.DSSYFVE Splice@chr  | 2.05E-11 | 2.99E-04 |
| 11Nov2011 | 7745  | 553.78  | -10.2208 | 2 R.TASQK+1 chrX@5438   | 5.65E-10 | 0.008735 |
| 11Nov2011 | 31375 | 968.13  | 18.26018 | 3 _GCSIVPIS Splice@chr  | 2.60E-10 | 0.004688 |
| 11Nov2011 | 21519 | 833.92  | -21.2254 | 2 _IIEPYVAV Splice@chr  | 1.96E-11 | 2.99E-04 |
| 11Nov2011 | 31488 | 968.13  | 18.26018 | 3 _GCSIVPIS Splice@chr  | 2.99E-11 | 4.18E-04 |
| 11Nov2011 | 11512 | 1063.58 | 1.14882  | 1 K.YLINGNEI chr1@8687  | 5.66E-10 | 0.008735 |
| 11Nov2011 | 7925  | 553.78  | -25.7264 | 2 _SSLDKESC chr5@1239   | 6.26E-10 | 0.009623 |
| 11Nov2011 | 35869 | 1277.67 | 3.563978 | 2 R.DGSWVVI Splice@chr  | 8.44E-14 | 0        |
| 11Nov2011 | 30536 | 741.87  | -26.1725 | 2 K.KIFLQM+ chr2@1507   | 1.67E-10 | 0.00297  |
| 11Nov2011 | 10940 | 1161.66 | -19.4191 | 1 K.NSKDKLV Splice@chr  | 2.13E-10 | 0.003861 |
| 11Nov2011 | 22992 | 849.92  | 6.583873 | 2 Q.DSSYFVE Splice@chr  | 8.72E-13 | 0        |
| 11Nov2011 | 22993 | 1056.89 | 23.76658 | 3 I.SRVEDDS Splice@chr  | 6.16E-16 | 0        |
| 11Nov2011 | 22580 | 849.93  | 18.38221 | 2 Q.DSSYFVE Splice@chr  | 1.09E-11 | 2.00E-04 |
| 11Nov2011 | 22023 | 1034.57 | -2.45085 | 2 K.FK+14.01 Splice@chr | 4.51E-12 | 1.40E-04 |
| 11Nov2011 | 27458 | 1384.74 | 9.615872 | 1 K.FQNFQAI chr2@2226   | 4.37E-10 | 0.008328 |
| 11Nov2011 | 11199 | 566.31  | 21.45326 | 2 R.EVAQLEC chr5@1706   | 1.62E-10 | 0.003806 |
| 11Nov2011 | 29213 | 876.99  | -11.1881 | 2 V.FPCK+14 chrX@2447   | 3.06E-10 | 0.005879 |
| 11Nov2011 | 21183 | 833.92  | -21.2254 | 2 _IIEPYVAV Splice@chr  | 1.32E-12 | 0        |
| 11Nov2011 | 374   | 723.35  | -0.92778 | 1 R.FQGGGEI chr1@2595   | 5.45E-10 | 0.009577 |
| 11Nov2011 | 15152 | 1345.63 | -24.7692 | 2 _QVREMH Splice@chr    | 3.60E-10 | 0.00686  |
| 11Nov2011 | 27486 | 1385.75 | 14.42536 | 1 K.FQNFQAI chr2@2226   | 4.82E-10 | 0.009137 |
| 11Nov2011 | 30994 | 1000.51 | -15.4866 | 2 E.CLVVNLS Splice@chr  | 1.08E-10 | 0.002299 |
| 11Nov2011 | 18936 | 719.39  | 28.86707 | 2 R.FTQAGSE Splice@chr  | 6.69E-14 | 0        |
| 11Nov2011 | 11355 | 1064.58 | -2.00842 | 1 K.YLINGNEI chr1@8687  | 1.13E-10 | 0.002355 |
| 11Nov2011 | 7811  | 1107.57 | -12.7508 | 1 _SSLDKESC chr5@1239   | 1.40E-11 | 2.00E-04 |
| 11Nov2011 | 10907 | 1090.66 | -23.0402 | 1 K.KLKSMKN chr5@3701   | 4.06E-11 | 6.31E-04 |
| 11Nov2011 | 31288 | 963.14  | 21.93704 | 3 _CSIRPISG Splice@chr  | 8.50E-11 | 0.001656 |
| 11Nov2011 | 8799  | 693.87  | -6.6949  | 2 V.ICVAVGD chr5@1063   | 3.52E-10 | 0.006695 |
| 11Nov2011 | 13586 | 565.83  | 14.11658 | 2 R.ISLTNANI chr5@7793  | 2.92E-10 | 0.005822 |
| 11Nov2011 | 7839  | 463.77  | 1.18704  | 2 K.PVNIENLI chrX@1210  | 7.67E-11 | 0.001416 |
| 11Nov2011 | 10882 | 1089.65 | -29.1532 | 1 K.KLKSMKN chr5@3701   | 2.04E-10 | 0.004409 |
| 11Nov2011 | 8747  | 693.87  | -6.6949  | 2 V.ICVAVGD chr5@1063   | 3.08E-11 | 5.15E-04 |
| 11Nov2011 | 542   | 702.38  | 2.001521 | 1 _DAAGLAC chr3@2528    | 5.12E-12 | 1.40E-04 |
| 11Nov2011 | 11231 | 1063.58 | 1.14882  | 1 K.YLINGNEI chr1@8687  | 5.67E-10 | 0.009893 |
| 11Nov2011 | 6125  | 433.76  | 2.609238 | 2 _IVDLPGPI chr3@1104   | 1.96E-10 | 0.004065 |
| 11Nov2011 | 16849 | 671.37  | -24.0361 | 2 T.FNIVHTQ Splice@chr  | 4.77E-10 | 0.00903  |
| 11Nov2011 | 198   | 848.41  | 2.093776 | 1 R.EEAELEK chr2@4805   | 2.25E-10 | 0.004799 |
| 11Nov2011 | 13533 | 565.83  | 14.11658 | 2 R.ISLTNANI chr5@7793  | 5.30E-10 | 0.009474 |
| 11Nov2011 | 21425 | 1090.53 | -18.1295 | 2 K.INGVTVA chr3@6296   | 1.21E-10 | 0.00247  |
| 11Nov2011 | 24486 | 853.45  | -23.3178 | 2 K.NFKINSKI chr4@5819  | 4.30E-10 | 0.008279 |
| 11Nov2011 | 18989 | 719.39  | 28.86707 | 2 R.FTQAGSE Splice@chr  | 3.15E-13 | 0        |
| 11Nov2011 | 11865 | 975.56  | -2.75567 | 1 K.LPKLDAYI chr4@1149  | 1.06E-10 | 0.002182 |
| 11Nov2011 | 22529 | 849.93  | 18.38221 | 2 Q.DSSYFVE Splice@chr  | 3.04E-10 | 0.005822 |
| 11Nov2011 | 3414  | 1065.51 | -21.5582 | 1 K.FNNSEKA Splice@chr  | 4.14E-10 | 0.007955 |
| 11Nov2011 | 23657 | 804.91  | 25.79416 | 2 _LTMTWN chr1@4513     | 3.64E-10 | 0.006971 |
| 11Nov2011 | 11243 | 1064.59 | 7.411911 | 1 K.YLINGNEI chr1@8687  | 1.23E-10 | 0.002649 |

|           |       |         |          |                          |          |          |
|-----------|-------|---------|----------|--------------------------|----------|----------|
| 11Nov2011 | 9230  | 434.24  | 13.9946  | 3 _RSNDQTI chr5@6378     | 2.43E-10 | 0.005073 |
| 11Nov2011 | 29096 | 957.5   | 22.57714 | 3 K.LFQVLQN Splice@chr   | 2.72E-10 | 0.00556  |
| 11Nov2011 | 24762 | 969.01  | -11.2595 | 2 Y.QRHVFNI Splice@chr   | 2.45E-10 | 0.005188 |
| 11Nov2011 | 22392 | 972.04  | 1.604764 | 2 R.KKECGDK chr3@1197    | 1.92E-10 | 0.004065 |
| 11Nov2011 | 11122 | 566.31  | 21.45326 | 2 R.EVAQLEC chr5@1706    | 1.52E-10 | 0.003398 |
| 11Nov2011 | 17433 | 599.34  | -5.64446 | 3 _INKFLIFK- chr4@1511   | 3.27E-10 | 0.006141 |
| 11Nov2011 | 19555 | 622.7   | -11.061  | 3 P.RNWGKC chrX@1446     | 1.37E-10 | 0.002995 |
| 11Nov2011 | 6188  | 433.76  | 2.609238 | 2 _IVDLP GPI chr3@1104   | 1.01E-10 | 0.002002 |
| 11Nov2011 | 23600 | 804.91  | 25.79416 | 2 _LTMTWN chr1@4515      | 5.98E-11 | 9.95E-04 |
| 11Nov2011 | 20645 | 664.7   | 1.197202 | 3 _PTLNK+1. chr1@6526    | 2.53E-10 | 0.005296 |
| 11Nov2011 | 3446  | 439.74  | 18.7116  | 2 R.SIAMFGP chr2@4157    | 5.03E-10 | 0.009394 |
| 11Nov2011 | 29667 | 741.88  | -12.6527 | 2 K.KIFLQM+ chr2@1507    | 3.24E-10 | 0.006141 |
| 11Nov2011 | 11295 | 1064.58 | -2.00842 | 1 K.YLINGNEI chr1@8687   | 2.18E-10 | 0.004632 |
| 11Nov2011 | 26853 | 849.42  | 8.560987 | 2 Q.DSSYFVE Splice@chr   | 1.11E-10 | 0.002355 |
| 11Nov2011 | 364   | 722.35  | 3.723    | 1 R.FQGGGEI chr1@2595    | 3.42E-10 | 0.006362 |
| 11Nov2011 | 12540 | 560.94  | -12.2507 | 3 _EMFSAA\ chr4@3415     | 2.30E-10 | 0.00491  |
| 11Nov2011 | 9289  | 434.24  | 13.9946  | 3 _RSNDQTI chr5@6378     | 3.20E-10 | 0.006095 |
| 11Nov2011 | 19049 | 719.39  | 28.86707 | 2 R.FTQAGSE Splice@chr   | 1.82E-13 | 0        |
| 11Nov2011 | 6069  | 433.76  | 2.609238 | 2 _IVDLP GPI chr3@1104   | 2.22E-10 | 0.004799 |
| 11Nov2011 | 7063  | 936.48  | 27.86052 | 1 K.LNGGYEC chr2@1191    | 3.06E-11 | 5.15E-04 |
| 11Nov2011 | 6859  | 741.39  | -9.64508 | 2 K.FPENRHI\ chr2@1477   | 3.72E-11 | 6.31E-04 |
| 11Nov2011 | 21125 | 833.93  | -9.2006  | 2 _IIEPYVAV Splice@chr   | 6.52E-12 | 1.40E-04 |
| 11Nov2011 | 17411 | 893.98  | 23.35659 | 2 K.CTHLDKT chr5@2031    | 4.54E-10 | 0.00849  |
| 11Nov2011 | 6913  | 741.38  | -23.1647 | 2 K.FPENRHI\ chr2@1477   | 7.43E-11 | 0.001234 |
| 11Nov2011 | 27049 | 1147.24 | 4.705638 | 3 R.FQSAAIG Splice@chr   | 9.43E-15 | 0        |
| 11Nov2011 | 5750  | 741.38  | -23.1647 | 2 K.FPENRHI\ chr2@1477   | 1.68E-10 | 0.003974 |
| 11Nov2011 | 5428  | 604.31  | 24.98924 | 2 K.ERDRYSP chr5@7314    | 2.77E-10 | 0.006883 |
| 11Nov2011 | 3406  | 412.23  | 25.3069  | 2 R.IASYQGG chrX@1679    | 2.17E-10 | 0.005453 |
| 11Nov2011 | 8905  | 1025.61 | -11.6755 | 1 K.LGLGSL chr5@4945     | 2.43E-11 | 6.27E-04 |
| 11Nov2011 | 25329 | 1272.28 | 27.03865 | 3 K.FAVADEE Splice@chr   | 1.88E-14 | 0        |
| 11Nov2011 | 6497  | 1107.56 | -21.6943 | 1 _SSLDKESC chr5@1239    | 4.32E-11 | 0.001213 |
| 11Nov2011 | 5045  | 433.76  | 2.609238 | 2 _IVDLP GPI chr3@1104   | 2.29E-10 | 0.00568  |
| 11Nov2011 | 18767 | 1034.57 | -2.45085 | 2 K.FK+14.01 Splice@chr  | 4.02E-12 | 9.87E-05 |
| 11Nov2011 | 25308 | 968.46  | 13.6538  | 3 _GCSIVPIS Splice@chr   | 8.72E-11 | 0.002514 |
| 11Nov2011 | 2984  | 615.8   | -16.0827 | 2 _QLEISFD\ Splice@chr   | 3.88E-11 | 0.001131 |
| 11Nov2011 | 775   | 722.35  | 3.723    | 1 R.FQGGGEI chr1@2595    | 3.33E-10 | 0.007994 |
| 11Nov2011 | 11061 | 625.82  | -20.2839 | 2 R.K+14.016 chrX@1356   | 4.09E-10 | 0.009715 |
| 11Nov2011 | 24235 | 957.5   | 1.956888 | 3 R.FIEPIEDIF Splice@chr | 1.81E-10 | 0.004607 |
| 11Nov2011 | 24381 | 957.5   | 22.57714 | 3 K.LFQVLQN Splice@chr   | 2.90E-10 | 0.007031 |
| 11Nov2011 | 26459 | 928.82  | -24.1202 | 3 R.KSTAKLK\ chr2@8595   | 2.54E-10 | 0.006287 |
| 11Nov2011 | 24303 | 957.5   | 1.956888 | 3 R.FIEPIEDIF Splice@chr | 1.25E-10 | 0.003536 |
| 11Nov2011 | 15348 | 717.88  | 5.023339 | 2 R.LNIAMN\ Splice@chr   | 3.00E-10 | 0.007097 |
| 11Nov2011 | 25367 | 1272.28 | 27.03865 | 3 K.FAVADEE Splice@chr   | 3.93E-13 | 0        |
| 11Nov2011 | 9686  | 1063.58 | 1.14882  | 1 K.YLINGNEI chr1@8687   | 2.92E-10 | 0.007031 |
| 11Nov2011 | 4940  | 537.8   | -5.57144 | 2 K.DQGMLN chr5@2025     | 7.22E-11 | 0.002025 |
| 11Nov2011 | 5806  | 936.48  | 27.86052 | 1 K.LNGGYEC chr2@1191    | 6.41E-11 | 0.001699 |
| 11Nov2011 | 5698  | 741.38  | -23.1647 | 2 K.FPENRHI\ chr2@1477   | 2.88E-10 | 0.006958 |

|           |       |         |          |                         |          |          |
|-----------|-------|---------|----------|-------------------------|----------|----------|
| 11Nov2011 | 25402 | 954.46  | 24.98958 | 4 K.FAFADEE Splice@chr  | 1.33E-10 | 0.003601 |
| 11Nov2011 | 23383 | 1003.18 | 7.145987 | 3 R.CWNRRA Splice@chr   | 1.24E-12 | 0        |
| 11Nov2011 | 789   | 403.23  | 10.8661  | 2 R.AMVASG chr5@1721    | 7.54E-12 | 1.89E-04 |
| 11Nov2011 | 5861  | 936.48  | 27.86052 | 1 K.LNGGYEC chr2@1191   | 4.08E-11 | 0.001131 |
| 11Nov2011 | 3448  | 412.23  | 25.3069  | 2 R.IASYQGG chrX@1679   | 1.52E-10 | 0.003674 |
| 11Nov2011 | 556   | 702.38  | 2.001521 | 1 _DAAGLAC chr3@2528    | 5.21E-12 | 1.89E-04 |
| 11Nov2011 | 18353 | 1090.53 | -18.1295 | 2 K.INGVTVA chr3@6296   | 4.16E-11 | 0.001213 |
| 11Nov2011 | 26996 | 700.34  | -8.47482 | 1 R.SAPPDGF chr1@7570   | 1.70E-10 | 0.003974 |
| 11Nov2011 | 7255  | 875.49  | -6.28158 | 2 K.KKLKTEKI chr4@3680  | 2.95E-10 | 0.006288 |
| 11Nov2011 | 21735 | 843.45  | -16.7082 | 2 K.KMFPEKI chr1@3802   | 1.54E-10 | 0.002522 |
| 11Nov2011 | 25021 | 674.69  | -17.6138 | 3 R.KFSNPAN chr3@1239   | 1.62E-10 | 0.003266 |
| 11Nov2011 | 29683 | 884.49  | 21.74119 | 2 R.LYTFPSK+ chrX@8897  | 1.66E-10 | 0.003536 |
| 11Nov2011 | 13945 | 600.38  | 11.9772  | 2 R.PMISK+1 chr4@2554   | 5.31E-10 | 0.009474 |
| 11Nov2011 | 18432 | 1289.2  | -19.8826 | 2 K.TKKQKKK chrX@6244   | 1.00E-10 | 0.001973 |
| 11Nov2011 | 18577 | 1289.2  | -19.8826 | 2 K.TKKQKKK chrX@6244   | 9.75E-11 | 0.001864 |
| 11Nov2011 | 18457 | 1288.7  | -18.58   | 2 K.TKKQKKK chrX@6244   | 2.36E-10 | 0.003844 |
| 11Nov2011 | 18617 | 1288.7  | -18.58   | 2 K.TKKQKKK chrX@6244   | 7.01E-11 | 0.001704 |
| 11Nov2011 | 18149 | 1289.2  | -19.8826 | 2 K.TKKQKKK chrX@6244   | 1.49E-10 | 0.003548 |
| 11Nov2011 | 18266 | 1289.2  | -19.8826 | 2 K.TKKQKKK chrX@6244   | 4.28E-11 | 0.001758 |
| 11Nov2011 | 18090 | 1288.7  | -18.58   | 2 K.TKKQKKK chrX@6244   | 3.25E-10 | 0.006942 |
| 11Nov2011 | 18205 | 1289.2  | -19.8826 | 2 K.TKKQKKK chrX@6244   | 2.12E-10 | 0.004707 |
| 11Nov2011 | 18065 | 1289.2  | -19.8826 | 2 K.TKKQKKK chrX@6244   | 3.19E-10 | 0.006785 |
| 11Nov2011 | 18089 | 1289.2  | -19.8826 | 2 K.TKKQKKK chrX@6244   | 2.28E-10 | 0.004855 |
| 11Nov2011 | 9701  | 831.44  | -13.3765 | 1 K.MRNSVPI chr4@6597   | 3.65E-10 | 0.006209 |
| 11Nov2011 | 7458  | 875.49  | 11.27984 | 2 K.KIILM+15 chr4@5840  | 2.56E-10 | 0.003936 |
| 11Nov2011 | 9700  | 786.87  | -10.0965 | 2 P.SM+15.9' Splice@chr | 4.23E-10 | 0.005044 |
| 11Nov2011 | 15812 | 625.34  | -17.7921 | 2 K.SLKIDNFI chr3@1190  | 6.79E-11 | 0.001191 |
| 11Nov2011 | 14817 | 424.23  | 7.355039 | 2 K.EIMNGRI chr2@1058   | 1.77E-10 | 0.003276 |
| 11Nov2011 | 22941 | 1078.01 | -10.6297 | 2 G.QYVQST' chr2@4322   | 3.53E-10 | 0.006551 |
| 11Nov2011 | 23090 | 1078    | -19.9281 | 2 G.QYVQST' chr2@4322   | 5.85E-10 | 0.009517 |
| 11Nov2011 | 16613 | 984.97  | -3.78381 | 2 R.QNSYCTA Splice@chr  | 1.97E-10 | 0.004829 |
| 11Nov2011 | 18023 | 852.9   | -9.81548 | 2 R.FQMQRNL chr1@1224   | 4.10E-10 | 0.008742 |
| 11Nov2011 | 21329 | 549.3   | 19.70379 | 2 R.FDVIFNV chrX@5111   | 9.25E-11 | 0.002399 |
| 11Nov2011 | 6459  | 798.4   | -21.4056 | 2 R.FSGTELLI chr1@8832  | 6.64E-10 | 0.008238 |
| 11Nov2011 | 7803  | 798.4   | -21.4056 | 2 R.FSGTELLI chr1@8832  | 4.33E-10 | 0.008055 |
| 11Nov2011 | 7895  | 798.4   | -21.4056 | 2 R.FSGTELLI chr1@8832  | 5.48E-10 | 0.009681 |
| 11Nov2011 | 29150 | 862.95  | 16.89984 | 2 K.HVLQNDI chr5@1781   | 2.57E-10 | 0.00445  |
| 11Nov2011 | 30290 | 1016.19 | 8.737861 | 3 _KIQIFLFS( chr1@1254  | 3.71E-10 | 0.005685 |
| 11Nov2011 | 27050 | 1215.59 | -20.6247 | 3 E.IGQKNQI Splice@chr  | 5.69E-11 | 0.002161 |
| 11Nov2011 | 28432 | 1204.68 | -11.2231 | 3 K.KGGKVRH chr4@5471   | 4.45E-10 | 0.008206 |
| 11Nov2011 | 7870  | 473.29  | 12.74557 | 2 R.VLEFLAPI Splice@chr | 4.65E-10 | 0.008505 |
| 11Nov2011 | 18096 | 1128.02 | -19.6934 | 2 G.SEDQKST Splice@chr  | 3.93E-10 | 0.00774  |
| 11Nov2011 | 30287 | 770.39  | 12.07686 | 1 R.MKTMM chr1@4694     | 2.60E-10 | 0.003936 |
| 11Nov2011 | 27753 | 989.53  | -24.3686 | 2 N.FRLLVIFS chr1@1191  | 4.28E-10 | 0.008982 |
| 11Nov2011 | 15002 | 505.58  | -23.7891 | 3 K.LSSDDFV chr1@3182   | 2.47E-10 | 0.003999 |
| 11Nov2011 | 14824 | 505.58  | -23.7891 | 3 K.LSSDDFV chr1@3182   | 3.69E-10 | 0.006816 |
| 11Nov2011 | 14885 | 505.58  | -23.7891 | 3 K.LSSDDFV chr1@3182   | 4.26E-10 | 0.008055 |

|           |       |         |          |                         |          |          |
|-----------|-------|---------|----------|-------------------------|----------|----------|
| 11Nov2011 | 14899 | 505.58  | -23.7891 | 3 K.LSSDDFV chr1@3182   | 1.22E-10 | 0.002867 |
| 11Nov2011 | 650   | 816.46  | -20.7065 | 2 K.EKMGKN Splice@chr   | 2.05E-10 | 0.004667 |
| 11Nov2011 | 11657 | 573.3   | 15.53336 | 2 K.NIKVGDC chr2@1306   | 3.16E-10 | 0.006887 |
| 11Nov2011 | 2624  | 418.71  | -3.8722  | 2 R.WITSSDK chr1@4395   | 3.38E-10 | 0.003469 |
| 11Nov2011 | 19631 | 686.88  | 23.46791 | 2 K.NPIRPEK chr4@1395   | 3.91E-10 | 0.006735 |
| 11Nov2011 | 8965  | 721.38  | 7.299743 | 1 K.MAEGKG chr1@4980    | 4.48E-10 | 0.005713 |
| 11Nov2011 | 1121  | 975.42  | -21.0654 | 1 R.YYYSHNK chr3@6595   | 1.80E-10 | 0.004412 |
| 11Nov2011 | 23528 | 895.48  | -4.40247 | 2 W.KNQENS chr5@1077    | 3.63E-10 | 0.006236 |
| 11Nov2011 | 9281  | 537.31  | -25.9128 | 2 _ILENQKIS chr2@4228   | 5.69E-10 | 0.009221 |
| 11Nov2011 | 28258 | 850.46  | 20.90948 | 2 R.FSEVYRN Splice@chr  | 2.65E-10 | 0.005011 |
| 11Nov2011 | 32823 | 850.45  | 9.125443 | 2 R.FSEVYRN Splice@chr  | 5.19E-10 | 0.008994 |
| 11Nov2011 | 30834 | 850.45  | 9.125443 | 2 R.FSEVYRN Splice@chr  | 6.35E-10 | 0.009497 |
| 11Nov2011 | 34014 | 1146.91 | 18.11004 | 4 _WVRYLVC Splice@chr   | 4.04E-10 | 0.006935 |
| 11Nov2011 | 2122  | 590.32  | 16.74293 | 2 R.NKSLEM+ chr2@4802   | 1.93E-11 | 1.99E-04 |
| 11Nov2011 | 27504 | 1043.21 | -4.5289  | 3 R.KSIEGVDI chrX@8945  | 2.97E-10 | 0.006464 |
| 11Nov2011 | 34776 | 805.17  | 21.58217 | 4 R.HDTPLYC chr1@7966   | 2.35E-10 | 0.004705 |
| 11Nov2011 | 16854 | 1000.57 | 4.002652 | 2 K.RNDLKGK Splice@chr  | 2.54E-10 | 0.005784 |
| 11Nov2011 | 17336 | 1000.57 | 4.002652 | 2 K.RNDLKGK Splice@chr  | 2.48E-10 | 0.003887 |
| 11Nov2011 | 17276 | 1000.57 | 4.002652 | 2 K.RNDLKGK Splice@chr  | 1.28E-10 | 0.002594 |
| 11Nov2011 | 18231 | 1000.57 | 4.002652 | 2 K.RNDLKGK Splice@chr  | 2.05E-10 | 0.003989 |
| 11Nov2011 | 12135 | 877.45  | -26.8106 | 2 _RIPRM+1 Splice@chr   | 1.22E-10 | 0.002142 |
| 11Nov2011 | 16126 | 662.86  | 7.984656 | 2 S.INM+15.5 chr4@2551  | 4.21E-10 | 0.008495 |
| 11Nov2011 | 32381 | 812.11  | 1.531592 | 3 _PNCAISLF chr4@8824   | 5.64E-10 | 0.008472 |
| 11Nov2011 | 35666 | 1033.52 | 12.01389 | 1 R.FSDFLEK Splice@chr  | 5.82E-10 | 0.009368 |
| 11Nov2011 | 11558 | 456.75  | 6.294503 | 2 R.KTYLMEK Splice@chr  | 4.59E-10 | 0.00871  |
| 11Nov2011 | 24746 | 907.47  | 25.68547 | 1 R.TSWDRN Splice@chr   | 3.86E-10 | 0.008011 |
| 11Nov2011 | 24218 | 907.47  | 25.68547 | 1 R.TSWDRN Splice@chr   | 4.65E-10 | 0.009252 |
| 11Nov2011 | 20139 | 804.46  | 11.16715 | 2 _EK+14.01 chr2@4905   | 3.50E-10 | 0.006642 |
| 11Nov2011 | 26082 | 1024.52 | -27.8903 | 2 F.K+14.016 chr4@8225  | 3.33E-10 | 0.006802 |
| 11Nov2011 | 27875 | 1024.52 | -27.8903 | 2 F.K+14.016 chr4@8225  | 2.79E-10 | 0.006136 |
| 11Nov2011 | 28243 | 1024.52 | -27.8903 | 2 F.K+14.016 chr4@8225  | 3.95E-10 | 0.007496 |
| 11Nov2011 | 27430 | 1024.52 | -27.8903 | 2 F.K+14.016 chr4@8225  | 2.04E-10 | 0.003624 |
| 11Nov2011 | 28215 | 1024.52 | -27.8903 | 2 F.K+14.016 chr4@8225  | 4.65E-10 | 0.008811 |
| 11Nov2011 | 18326 | 838.89  | -4.07928 | 2 K.FISVYFYF chrX@2860  | 4.10E-10 | 0.007955 |
| 11Nov2011 | 35101 | 582.65  | -16.3429 | 3 K.VSFLSSSK Splice@chr | 3.14E-10 | 0.005291 |
| 11Nov2011 | 9580  | 494.78  | 1.425137 | 2 R.KNEENLII chr1@9396  | 4.40E-10 | 0.008903 |
| 11Nov2011 | 25660 | 521.3   | 24.95499 | 2 R.NLNEVEII chr4@1305  | 1.52E-10 | 0.002708 |
| 11Nov2011 | 25578 | 521.3   | 24.95499 | 2 R.NLNEVEII chr4@1305  | 2.95E-10 | 0.005551 |
| 11Nov2011 | 34115 | 1020.53 | 20.11553 | 2 R.HHHHHR chr4@2747    | 5.13E-10 | 0.008994 |
| 11Nov2011 | 6915  | 516.78  | -6.8089  | 2 R.LNMAEN chr4@7815    | 4.15E-10 | 0.008137 |
| 11Nov2011 | 7713  | 516.78  | -6.8089  | 2 R.LNMAEN chr4@7815    | 5.31E-10 | 0.008341 |
| 11Nov2011 | 28992 | 844.45  | -11.1131 | 2 R.TQKKMLI chr1@6381   | 5.53E-11 | 9.83E-04 |
| 11Nov2011 | 33345 | 1042.56 | 7.300323 | 2 E.NFDIEM+ chr4@1785   | 5.46E-10 | 0.009142 |
| 11Nov2011 | 29801 | 904.41  | -27.7314 | 3 I.DFDFVM+ chr5@2090   | 2.51E-10 | 0.00559  |
| 11Nov2011 | 3170  | 427.2   | 0.432658 | 2 _VDMSTG: chr3@3680    | 3.60E-10 | 0.005948 |
| 11Nov2011 | 4548  | 550.29  | -0.11112 | 2 _MGAHWI chr5@1084     | 3.55E-10 | 0.0054   |
| 11Nov2011 | 13913 | 819.42  | 26.53059 | 2 K.TQIEEDG chr5@1154   | 1.12E-10 | 0.002878 |

|           |       |         |          |                         |          |          |
|-----------|-------|---------|----------|-------------------------|----------|----------|
| 11Nov2011 | 17223 | 556.35  | 22.82847 | 2 K.NKQIPNV chr3@6735   | 2.59E-10 | 0.005784 |
| 11Nov2011 | 31581 | 1075.03 | 17.88226 | 2 R.FK+14.01 Splice@chr | 1.84E-10 | 0.003124 |
| 11Nov2011 | 20270 | 1117.54 | 5.497287 | 2 I.IHQMHM chr5@6008    | 5.57E-10 | 0.008416 |
| 11Nov2011 | 4572  | 934.46  | -3.66163 | 1 _EYQPELR Splice@chr   | 4.77E-10 | 0.008552 |
| 11Nov2011 | 4616  | 935.47  | 3.402383 | 1 _EYQPELR Splice@chr   | 5.62E-10 | 0.009435 |
| 11Nov2011 | 4316  | 934.46  | -3.66163 | 1 _EYQPELR Splice@chr   | 3.61E-10 | 0.006246 |
| 11Nov2011 | 32497 | 858.94  | -18.0435 | 2 _VHRDHQ Splice@chr    | 2.20E-10 | 0.004799 |
| 11Nov2011 | 5665  | 451.27  | 14.8624  | 2 K.IEVDGVL chrX@1251   | 3.86E-10 | 0.006294 |
| 11Nov2011 | 4427  | 864.38  | 14.63385 | 1 R.EDWGM chr5@6657     | 7.67E-12 | 0        |
| 11Nov2011 | 4489  | 864.38  | 14.63385 | 1 R.EDWGM chr5@6657     | 5.47E-11 | 0.0012   |
| 11Nov2011 | 4470  | 864.38  | 14.63385 | 1 R.EDWGM chr5@6657     | 5.17E-11 | 8.41E-04 |
| 11Nov2011 | 24226 | 1066.03 | 10.23556 | 2 R.ETIEFPN Splice@chr  | 2.09E-10 | 0.004866 |
| 11Nov2011 | 9338  | 868.42  | -0.63154 | 1 K.SSSGSLSS chr2@1132  | 3.56E-10 | 0.007222 |
| 11Nov2011 | 9158  | 868.42  | -0.63154 | 1 K.SSSGSLSS chr2@1132  | 2.29E-10 | 0.005264 |
| 11Nov2011 | 9940  | 868.42  | -0.63154 | 1 K.SSSGSLSS chr2@1132  | 5.79E-10 | 0.009737 |
| 11Nov2011 | 9428  | 868.42  | -0.63154 | 1 K.SSSGSLSS chr2@1132  | 2.80E-10 | 0.004104 |
| 11Nov2011 | 9527  | 868.42  | -0.63154 | 1 K.SSSGSLSS chr2@1132  | 4.31E-10 | 0.007264 |
| 11Nov2011 | 10238 | 868.42  | -0.63154 | 1 K.SSSGSLSS chr2@1132  | 4.25E-10 | 0.00685  |
| 11Nov2011 | 21640 | 718.43  | 1.065687 | 2 K.RAIYTVV chr2@4881   | 2.72E-10 | 0.006105 |
| 11Nov2011 | 27840 | 1103.09 | -3.40654 | 2 R.LDRPMS chr3@5228    | 3.94E-10 | 0.008075 |
| 11Nov2011 | 7663  | 519.6   | -26.5197 | 3 K.IGSM+15 chr5@1654   | 1.18E-10 | 0.00247  |
| 11Nov2011 | 30253 | 1287.68 | -21.4408 | 2 K.FRQELNS chrX@2164   | 3.97E-10 | 0.008175 |
| 11Nov2011 | 34353 | 1304.66 | 1.054648 | 2 _WLKLERR Splice@chr   | 1.74E-10 | 0.003018 |
| 11Nov2011 | 11034 | 993.54  | 3.074729 | 1 _SLLFVDC chrX@1374    | 3.57E-10 | 0.007378 |
| 11Nov2011 | 25536 | 855.48  | -6.07153 | 2 K.IFTQTK+1 Splice@chr | 2.70E-10 | 0.005403 |
| 11Nov2011 | 26461 | 855.48  | -6.07153 | 2 K.IFTQTK+1 Splice@chr | 2.72E-10 | 0.003988 |
| 11Nov2011 | 9783  | 672.83  | 25.16613 | 2 R.QFEYSGN Splice@chr  | 1.01E-10 | 0.002397 |
| 11Nov2011 | 5192  | 848.47  | 21.53477 | 1 R.FALSDPA Splice@chr  | 5.37E-10 | 0.00868  |
| 11Nov2011 | 5139  | 848.47  | 21.53477 | 1 R.FALSDPA Splice@chr  | 4.82E-10 | 0.008171 |
| 11Nov2011 | 18520 | 887.96  | -23.1899 | 2 D.FFFLENS chr3@1875   | 4.25E-10 | 0.008851 |
| 11Nov2011 | 32989 | 1016.24 | 18.03615 | 3 _SRCSFLFF Splice@chr  | 3.65E-10 | 0.007582 |
| 11Nov2011 | 30915 | 883.42  | -6.43752 | 1 R.AGGNNF chr3@9108    | 3.94E-10 | 0.007826 |
| 11Nov2011 | 30573 | 959.52  | -27.8897 | 2 K.KSNFFRFI chr3@1331  | 3.36E-10 | 0.006942 |
| 11Nov2011 | 29154 | 1352.75 | 27.48732 | 2 _RK+14.01 chr3@9421   | 1.85E-10 | 0.00292  |
| 11Nov2011 | 20584 | 1179.63 | 3.935689 | 2 _KHYEKYK chr4@7175    | 2.32E-10 | 0.004865 |
| 11Nov2011 | 27728 | 798.4   | -12.6137 | 4 K.SGDAGIV Splice@chr  | 5.42E-12 | 4.48E-04 |
| 11Nov2011 | 27123 | 798.4   | -12.6137 | 4 K.SGDAGIV Splice@chr  | 2.20E-12 | 2.19E-04 |
| 11Nov2011 | 27160 | 1063.87 | -6.04876 | 3 K.SGDAGIV Splice@chr  | 1.10E-10 | 0.003002 |
| 11Nov2011 | 27450 | 798.4   | -12.6137 | 4 K.SGDAGIV Splice@chr  | 1.71E-11 | 3.29E-04 |
| 11Nov2011 | 32350 | 1309.6  | -19.4792 | 2 _PFSEARF Splice@chr   | 5.26E-10 | 0.008237 |
| 11Nov2011 | 23178 | 1054.07 | 23.45744 | 2 _SVSSK+14 chr4@3345   | 3.72E-10 | 0.007847 |
| 11Nov2011 | 33008 | 903.49  | -19.0263 | 3 K.QLKENIFI chr1@9975  | 3.37E-10 | 0.005594 |
| 11Nov2011 | 26275 | 776.39  | -0.23615 | 1 K.SVAESQR chr3@6105   | 8.12E-10 | 0.009965 |
| 11Nov2011 | 23815 | 574.82  | -9.25392 | 2 K.TLNTTHL Splice@chr  | 2.99E-10 | 0.006285 |
| 11Nov2011 | 22401 | 574.82  | -9.25392 | 2 K.TLNTTHL Splice@chr  | 1.87E-10 | 0.004767 |
| 11Nov2011 | 9486  | 579.81  | -21.5115 | 2 _KIAESGSF chr4@1695   | 5.04E-10 | 0.009479 |
| 11Nov2011 | 8878  | 579.81  | -21.5115 | 2 _KIAESGSF chr4@1695   | 4.58E-10 | 0.009278 |

|           |       |         |          |                        |          |          |
|-----------|-------|---------|----------|------------------------|----------|----------|
| 11Nov2011 | 32942 | 942.52  | -15.234  | 2 R.FHITSQSI chr2@5676 | 1.02E-10 | 0.00206  |
| 11Nov2011 | 15300 | 943.57  | -3.04345 | 1 K.GSK+14.C chrX@1205 | 1.78E-10 | 0.003418 |
| 11Nov2011 | 10480 | 752.88  | -14.2545 | 2 R.GKCNGG chr4@5126   | 4.70E-10 | 0.007914 |
| 11Nov2011 | 10475 | 752.88  | -14.2545 | 2 R.GKCNGG chr4@5126   | 3.78E-10 | 0.007303 |
| 11Nov2011 | 3036  | 1069.49 | 3.915799 | 2 R.SEQQSM Splice@chr  | 1.75E-14 | 0        |
| 11Nov2011 | 3058  | 713.33  | 4.944505 | 3 R.SEQQSM Splice@chr  | 7.31E-11 | 0.001355 |
| 11Nov2011 | 2949  | 1068.99 | 5.486428 | 2 R.SEQQSM Splice@chr  | 1.76E-15 | 0        |
| 11Nov2011 | 2807  | 916.48  | -14.5476 | 1 K.QETTPAI chr5@3605  | 3.16E-10 | 0.007471 |
| 11Nov2011 | 23348 | 1044.06 | -5.38344 | 2 R.SLQTEV Splice@chr  | 9.44E-22 | 0        |
| 11Nov2011 | 23342 | 1044.57 | 2.487942 | 2 R.SLQTEV Splice@chr  | 2.26E-21 | 0        |
| 11Nov2011 | 24208 | 1044.07 | 4.096092 | 2 R.SLQTEV Splice@chr  | 7.48E-22 | 0        |
| 11Nov2011 | 24180 | 1044.57 | 2.487942 | 2 R.SLQTEV Splice@chr  | 3.93E-21 | 0        |
| 11Nov2011 | 23698 | 1044.57 | 2.487942 | 2 R.SLQTEV Splice@chr  | 1.09E-21 | 0        |
| 11Nov2011 | 23782 | 1044.57 | 2.487942 | 2 R.SLQTEV Splice@chr  | 3.05E-20 | 0        |
| 11Nov2011 | 23722 | 1044.07 | 4.096092 | 2 R.SLQTEV Splice@chr  | 7.90E-22 | 0        |
| 11Nov2011 | 21956 | 1044.57 | 2.487942 | 2 R.SLQTEV Splice@chr  | 1.70E-21 | 0        |
| 11Nov2011 | 6536  | 442.27  | 7.815112 | 2 _NLVEPAL Splice@chr  | 3.29E-10 | 0.003469 |
| 11Nov2011 | 10417 | 786.87  | -27.8038 | 2 S.WSTTSST chr1@6478  | 4.62E-10 | 0.009686 |
| 11Nov2011 | 19758 | 1058.98 | -15.5538 | 2 F.QKFYSFQ chr2@4922  | 2.66E-11 | 5.10E-04 |
| 11Nov2011 | 19710 | 1058.98 | -15.5538 | 2 F.QKFYSFQ chr2@4922  | 1.94E-11 | 3.16E-04 |
| 11Nov2011 | 21138 | 1058.98 | -15.5538 | 2 F.QKFYSFQ chr2@4922  | 1.85E-11 | 4.39E-04 |
| 11Nov2011 | 20981 | 1058.98 | -15.5538 | 2 F.QKFYSFQ chr2@4922  | 4.63E-11 | 6.89E-04 |
| 11Nov2011 | 1009  | 420.73  | -16.5219 | 2 _LDVVHEK chr1@6674   | 5.00E-10 | 0.009344 |
| 11Nov2011 | 24804 | 837.96  | -10.9805 | 2 R.NLRVK+1 chr1@2688  | 1.45E-10 | 0.003537 |
| 11Nov2011 | 25863 | 837.96  | -10.9805 | 2 R.NLRVK+1 chr1@2688  | 1.17E-10 | 0.002285 |
| 11Nov2011 | 24495 | 1151.07 | -19.636  | 2 K.VGESRDN Splice@chr | 4.23E-10 | 0.005044 |
| 11Nov2011 | 5376  | 731.41  | -4.43201 | 1 _KDATAPK chr3@7059   | 2.13E-10 | 0.004577 |
| 11Nov2011 | 1991  | 731.41  | -4.43201 | 1 _KDATAPK chr3@7059   | 4.37E-10 | 0.008328 |
| 11Nov2011 | 23914 | 784.42  | -26.6807 | 3 _LVK+14.0 Splice@chr | 4.00E-10 | 0.008175 |
| 11Nov2011 | 21639 | 784.42  | -26.6807 | 3 _LVK+14.0 Splice@chr | 3.13E-11 | 7.08E-04 |
| 11Nov2011 | 23366 | 784.42  | -26.6807 | 3 _LVK+14.0 Splice@chr | 7.15E-11 | 0.001598 |
| 11Nov2011 | 29309 | 942.09  | -15.3453 | 2 K.KNWKK+ chr2@9679   | 2.64E-10 | 0.004361 |
| 11Nov2011 | 910   | 845.48  | 28.26075 | 1 R.FAVYFAK chr1@8163  | 3.86E-10 | 0.008011 |
| 11Nov2011 | 952   | 845.47  | 16.40714 | 1 R.FAVYFAK chr1@8163  | 4.12E-10 | 0.007751 |
| 11Nov2011 | 866   | 845.48  | 28.26075 | 1 R.FAVYFAK chr1@8163  | 3.06E-10 | 0.004554 |
| 11Nov2011 | 32758 | 1109.58 | -8.03832 | 2 R.CAK+14.C chrX@1687 | 5.31E-10 | 0.008727 |
| 11Nov2011 | 20694 | 884.5   | 20.35842 | 2 E.LKRVKCPi chr1@7920 | 3.28E-10 | 0.006942 |
| 11Nov2011 | 184   | 619.26  | -14.1171 | 1 K.DGGGGE chr5@1642   | 2.28E-11 | 4.50E-04 |
| 11Nov2011 | 10858 | 848.47  | -0.50415 | 1 R.VPLFMNI Splice@chr | 2.66E-10 | 0.004412 |
| 11Nov2011 | 25742 | 753.06  | -15.4528 | 3 R.GFMVMI Splice@chr  | 3.79E-11 | 4.85E-04 |
| 11Nov2011 | 21815 | 1033.54 | 12.33206 | 2 V.VK+14.01 chr4@1676 | 3.74E-10 | 0.00724  |
| 11Nov2011 | 22872 | 1033.54 | 12.33206 | 2 V.VK+14.01 chr4@1676 | 3.88E-10 | 0.00602  |
| 11Nov2011 | 31131 | 1078.89 | 21.46869 | 3 K.SRSK+14. chr5@4756 | 6.02E-10 | 0.009427 |
| 11Nov2011 | 559   | 1000.59 | 27.93569 | 1 R.KNKEQQI Splice@chr | 4.11E-10 | 0.006865 |
| 11Nov2011 | 481   | 1000.59 | 27.93569 | 1 R.KNKEQQI Splice@chr | 3.18E-10 | 0.006785 |
| 11Nov2011 | 540   | 1000.59 | 27.93569 | 1 R.KNKEQQI Splice@chr | 5.37E-10 | 0.009192 |
| 11Nov2011 | 496   | 1000.59 | 27.93569 | 1 R.KNKEQQI Splice@chr | 4.67E-10 | 0.007914 |

|           |       |         |          |                         |          |          |
|-----------|-------|---------|----------|-------------------------|----------|----------|
| 11Nov2011 | 381   | 1000.59 | 27.93569 | 1 R.KNKEQQI Splice@chr  | 2.53E-10 | 0.004401 |
| 11Nov2011 | 467   | 1000.59 | 27.93569 | 1 R.KNKEQQI Splice@chr  | 6.41E-10 | 0.009914 |
| 11Nov2011 | 29446 | 914.48  | -9.75514 | 2 K.HRCHKN\ chr2@1129   | 3.46E-10 | 0.005746 |
| 11Nov2011 | 29489 | 914.48  | -9.75514 | 2 K.HRCHKN\ chr2@1129   | 1.71E-10 | 0.002969 |
| 11Nov2011 | 28811 | 914.48  | -9.75514 | 2 K.HRCHKN\ chr2@1129   | 2.24E-10 | 0.005215 |
| 11Nov2011 | 29250 | 914.48  | -9.75514 | 2 K.HRCHKN\ chr2@1129   | 2.15E-10 | 0.003945 |
| 11Nov2011 | 29199 | 914.48  | -9.75514 | 2 K.HRCHKN\ chr2@1129   | 1.71E-10 | 0.003317 |
| 11Nov2011 | 28006 | 914.48  | -9.75514 | 2 K.HRCHKN\ chr2@1129   | 1.93E-11 | 2.73E-04 |
| 11Nov2011 | 27968 | 914.48  | -9.75514 | 2 K.HRCHKN\ chr2@1129   | 8.24E-12 | 7.06E-05 |
| 11Nov2011 | 29606 | 914.48  | -9.75514 | 2 K.HRCHKN\ chr2@1129   | 2.82E-11 | 4.76E-04 |
| 11Nov2011 | 29559 | 914.48  | -9.75514 | 2 K.HRCHKN\ chr2@1129   | 1.86E-11 | 3.63E-04 |
| 11Nov2011 | 29683 | 914.49  | 1.202688 | 2 K.HRCHKN\ chr2@1129   | 3.10E-11 | 4.75E-04 |
| 11Nov2011 | 22809 | 939.48  | -16.7545 | 2 L.GVADEKS chr2@1027   | 1.01E-10 | 0.002018 |
| 11Nov2011 | 21784 | 938.97  | -25.6377 | 2 L.GVADEKS chr2@1027   | 1.02E-10 | 0.002131 |
| 11Nov2011 | 24085 | 704.37  | -12.4956 | 2 K.TQLQVLF Splice@chr  | 1.26E-10 | 0.003276 |
| 11Nov2011 | 27748 | 871.94  | 24.43888 | 2 Q.VQMME Splice@chr    | 2.23E-10 | 0.004677 |
| 11Nov2011 | 30693 | 871.93  | 12.93881 | 2 Q.VQMME Splice@chr    | 5.40E-10 | 0.009095 |
| 11Nov2011 | 33128 | 962.46  | 10.24191 | 3 _AVPFVPI\$ Splice@chr | 1.67E-10 | 0.002969 |
| 11Nov2011 | 8362  | 843.43  | -4.31217 | 2 K.SEFVSFNI chr3@6159  | 5.79E-10 | 0.007783 |
| 11Nov2011 | 982   | 458.26  | -24.3176 | 2 R.KPTTGVS chr2@5879   | 2.29E-10 | 0.00568  |
| 11Nov2011 | 1812  | 719.33  | -13.5949 | 2 K.LIKMCDD Splice@chr  | 5.97E-10 | 0.007783 |
| 11Nov2011 | 4690  | 846.46  | -18.6975 | 1 R.KMPETLK chr4@1316   | 4.78E-10 | 0.007959 |
| 11Nov2011 | 4428  | 846.46  | -18.6975 | 1 R.KMPETLK chr4@1316   | 3.25E-10 | 0.005477 |
| 11Nov2011 | 18205 | 887.93  | 29.43791 | 2 I.DEREESTN Splice@chr | 1.50E-10 | 0.003537 |
| 11Nov2011 | 17947 | 887.93  | 29.43791 | 2 I.DEREESTN Splice@chr | 8.12E-11 | 0.001343 |
| 11Nov2011 | 18644 | 887.93  | 29.43791 | 2 I.DEREESTN Splice@chr | 2.19E-10 | 0.003376 |
| 11Nov2011 | 19637 | 887.93  | 29.43791 | 2 I.DEREESTN Splice@chr | 4.06E-11 | 0.001108 |
| 11Nov2011 | 8078  | 573.33  | -27.4825 | 2 K.K+14.016 chr4@6114  | 2.78E-10 | 0.005139 |
| 11Nov2011 | 7712  | 556.3   | 8.418136 | 2 R.AEADILEf chr1@1288  | 2.59E-10 | 0.005011 |
| 11Nov2011 | 7906  | 556.31  | 26.46071 | 2 R.AEADILEf chr1@1288  | 3.88E-10 | 0.00602  |
| 11Nov2011 | 6633  | 526.78  | -3.83085 | 2 K.KLDLNM\ chr2@7182   | 2.19E-11 | 7.92E-04 |
| 11Nov2011 | 6579  | 526.78  | -3.83085 | 2 K.KLDLNM\ chr2@7182   | 4.38E-11 | 0.001291 |
| 11Nov2011 | 14585 | 925.99  | 10.79572 | 2 R.RNGKNG chr3@1041    | 7.12E-10 | 0.008541 |
| 11Nov2011 | 32367 | 1031.06 | -6.01618 | 2 S.QVDELLQ chr1@3042   | 4.36E-10 | 0.008107 |
| 11Nov2011 | 1056  | 465.78  | 28.16952 | 2 K.DGKVLVC chrX@3954   | 2.27E-10 | 0.003961 |
| 11Nov2011 | 30139 | 798.4   | 12.60083 | 2 K.VHLVYFN chr5@7770   | 1.71E-10 | 0.003883 |
| 11Nov2011 | 34226 | 798.4   | 12.60083 | 2 K.VHLVYFN chr5@7770   | 3.03E-10 | 0.004978 |
| 11Nov2011 | 34264 | 798.4   | 12.60083 | 2 K.VHLVYFN chr5@7770   | 5.48E-11 | 0.001503 |
| 11Nov2011 | 32420 | 798.4   | 12.60083 | 2 K.VHLVYFN chr5@7770   | 9.26E-11 | 0.001707 |
| 11Nov2011 | 32542 | 798.4   | 12.60083 | 2 K.VHLVYFN chr5@7770   | 3.92E-10 | 0.00769  |
| 11Nov2011 | 6273  | 734.93  | -18.5146 | 2 R.RKAVREC Splice@chr  | 4.40E-10 | 0.008903 |
| 11Nov2011 | 30043 | 1136.56 | 3.439968 | 2 _VCHWK+ chr2@1521     | 5.56E-10 | 0.009734 |
| 11Nov2011 | 8282  | 731.39  | -16.7129 | 2 K.KFQFHDF chrX@7811   | 1.16E-10 | 0.003138 |
| 11Nov2011 | 8338  | 731.39  | -16.7129 | 2 K.KFQFHDF chrX@7811   | 3.19E-10 | 0.007623 |
| 11Nov2011 | 20209 | 807.91  | 27.6662  | 2 R.KM+15.9 chr1@1122   | 4.84E-10 | 0.009645 |
| 11Nov2011 | 22019 | 807.9   | 15.32865 | 2 R.KM+15.9 chr1@1122   | 5.29E-10 | 0.008237 |
| 11Nov2011 | 4210  | 948.5   | 17.92966 | 1 R.DLTNDITI Splice@chr | 4.26E-10 | 0.008597 |

|           |       |         |          |                          |          |          |
|-----------|-------|---------|----------|--------------------------|----------|----------|
| 11Nov2011 | 4857  | 437.75  | 20.12455 | 2 _..NLNGKN! chr2@5936   | 5.57E-10 | 0.009119 |
| 11Nov2011 | 1161  | 524.31  | -11.6141 | 2 K.KTQAEIK` chr3@1188   | 1.46E-10 | 0.002491 |
| 11Nov2011 | 5151  | 428.74  | -11.9149 | 4 _..FGFLASSI Splice@chr | 2.28E-10 | 0.003741 |
| 11Nov2011 | 5107  | 428.74  | -11.9149 | 4 _..FGFLASSI Splice@chr | 5.37E-12 | 3.50E-04 |
| 11Nov2011 | 5203  | 428.74  | -11.9149 | 4 _..FGFLASSI Splice@chr | 1.45E-11 | 9.25E-04 |
| 11Nov2011 | 4516  | 473.76  | -9.231   | 2 R.TSGALSL/ chr1@2011   | 5.02E-10 | 0.007941 |
| 11Nov2011 | 4550  | 473.77  | 11.87765 | 2 R.TSGALSL/ chr1@2011   | 1.82E-10 | 0.004017 |
| 11Nov2011 | 6061  | 830.47  | 27.06052 | 2 R.RTRRLEYI chr5@4505   | 5.86E-11 | 0.00143  |
| 11Nov2011 | 32743 | 746.38  | -19.2427 | 2 K.LYSPDSG/ chrX@1749   | 3.50E-11 | 0.001527 |
| 11Nov2011 | 1641  | 522.28  | 6.205747 | 2 K.SSSSHARI chr1@5178   | 4.25E-12 | 1.89E-04 |
| 11Nov2011 | 24111 | 760.71  | -6.831   | 3 S.LM+15.9! chr2@1455   | 2.97E-10 | 0.006464 |
| 11Nov2011 | 2675  | 521.31  | -1.46569 | 2 _..KLSIISHDI chr3@1431 | 3.92E-10 | 0.007826 |
| 11Nov2011 | 29552 | 1323.66 | 13.90232 | 1 R.NCNCNK- chrX@8029    | 5.50E-11 | 9.14E-04 |
| 11Nov2011 | 2244  | 616.8   | 4.063792 | 2 R.SGGGGG chr5@1954     | 4.39E-10 | 0.008328 |
| 11Nov2011 | 19460 | 916.46  | 1.168576 | 2 G.TEVFGK+ chr1@2717    | 4.58E-10 | 0.005793 |
| 11Nov2011 | 19507 | 555.96  | -11.7738 | 3 R.M+15.99 chrX@2184    | 3.68E-10 | 0.007222 |
| 11Nov2011 | 10431 | 570.3   | -4.34403 | 2 R.LPFFENI chr4@3451    | 1.62E-10 | 0.003266 |
| 11Nov2011 | 9919  | 570.3   | -4.34403 | 2 R.LPFFENI chr4@3451    | 4.32E-10 | 0.006684 |
| 11Nov2011 | 10461 | 570.3   | -4.34403 | 2 R.LPFFENI chr4@3451    | 7.74E-11 | 0.001416 |
| 11Nov2011 | 5798  | 971.55  | 3.338721 | 1 _..DSPIIRNR chr2@3547  | 3.22E-10 | 0.005277 |
| 11Nov2011 | 5788  | 971.56  | 13.66301 | 1 _..DSPIIRNR chr2@3547  | 3.26E-10 | 0.006942 |
| 11Nov2011 | 16240 | 759.88  | -7.28215 | 2 S.IDQLQLAI chr1@8550   | 4.20E-10 | 0.008812 |
| 11Nov2011 | 15302 | 759.88  | -7.28215 | 2 S.IDQLQLAI chr1@8550   | 5.63E-10 | 0.007233 |
| 11Nov2011 | 17895 | 759.88  | -7.28215 | 2 S.IDQLQLAI chr1@8550   | 5.26E-10 | 0.009474 |
| 11Nov2011 | 4232  | 1087.57 | -26.0294 | 1 R.FDLKPQN Splice@chr   | 5.20E-10 | 0.006673 |
| 11Nov2011 | 17889 | 807.9   | -22.3644 | 2 P.TK+14.01 chr1@7028   | 4.98E-10 | 0.007723 |
| 11Nov2011 | 19437 | 656.36  | -18.1296 | 3 R.PEKLIEM- chr3@1258   | 2.31E-11 | 3.03E-04 |
| 11Nov2011 | 19507 | 643.39  | 21.2543  | 2 I.LLLEEDQI/ Splice@chr | 5.21E-10 | 0.009474 |
| 11Nov2011 | 26238 | 928.46  | 18.60275 | 2 R.EPQFSRN chr3@2931    | 3.66E-10 | 0.007437 |
| 11Nov2011 | 26553 | 886     | 21.03534 | 2 K.RAK+14.( chr1@1112   | 5.15E-11 | 9.09E-04 |
| 11Nov2011 | 19039 | 1044.08 | -10.8586 | 2 R.NCRKLEK chr5@1968    | 4.88E-10 | 0.007616 |
| 11Nov2011 | 895   | 774.44  | 5.050565 | 1 R.DVKDGLk Splice@chr   | 5.49E-10 | 0.008535 |
| 11Nov2011 | 35835 | 1373.73 | -28.2776 | 1 K.MPKNKN chr2@1402     | 7.51E-11 | 0.001704 |
| 11Nov2011 | 12914 | 1059.61 | -4.21086 | 1 K.NITRQLM Splice@chr   | 4.58E-10 | 0.008903 |
| 11Nov2011 | 24840 | 792.47  | 13.77565 | 2 R.SRFAPPSI Splice@chr  | 7.02E-11 | 0.001546 |
| 11Nov2011 | 4548  | 537.81  | 22.93479 | 2 K.IAENSVEI chr3@1076   | 2.98E-10 | 0.006285 |
| 11Nov2011 | 5595  | 537.3   | 7.397674 | 2 K.IAENSVEI chr3@1076   | 2.46E-10 | 0.002649 |
| 11Nov2011 | 4074  | 537.81  | 22.93479 | 2 K.IAENSVEI chr3@1076   | 6.50E-10 | 0.008238 |
| 11Nov2011 | 13736 | 1094.58 | -2.62363 | 1 R.FEWITKN chr2@6136    | 5.84E-10 | 0.009534 |
| 11Nov2011 | 25618 | 916.97  | -24.7667 | 2 K.SRKAKKD Splice@chr   | 3.03E-10 | 0.005086 |
| 11Nov2011 | 25192 | 916.47  | -22.9344 | 2 K.SRKAKKD Splice@chr   | 3.58E-10 | 0.006804 |
| 11Nov2011 | 28717 | 928.45  | -7.47229 | 2 K.KEPCK+1- chrX@6177   | 1.77E-10 | 0.003018 |
| 11Nov2011 | 32621 | 1109.58 | 25.80773 | 2 V.NKWAFE Splice@chr    | 1.62E-10 | 0.003266 |
| 11Nov2011 | 28062 | 884.99  | -28.7222 | 2 R.DRRLRRA chr4@1283    | 1.80E-10 | 0.003071 |
| 11Nov2011 | 35768 | 1310.65 | -10.5325 | 1 R.VQAFSTN Splice@chr   | 2.01E-10 | 0.003272 |
| 11Nov2011 | 24917 | 1108    | -24.683  | 2 E.ADRFEKN Splice@chr   | 3.03E-10 | 0.006362 |
| 11Nov2011 | 28017 | 1108    | -24.683  | 2 E.ADRFEKN Splice@chr   | 3.39E-10 | 0.006298 |

|           |       |         |          |                          |          |          |
|-----------|-------|---------|----------|--------------------------|----------|----------|
| 11Nov2011 | 26809 | 1108    | -24.683  | 2 E.ADRFEKN Splice@chr   | 9.43E-11 | 0.001703 |
| 11Nov2011 | 20037 | 1013.64 | 28.99252 | 1 R.INNAISILI chr5@1602  | 2.15E-10 | 0.003535 |
| 11Nov2011 | 761   | 549.78  | -29.1391 | 2 R.RKDAGHI chrX@3850    | 2.65E-10 | 0.004991 |
| 11Nov2011 | 733   | 549.78  | -29.1391 | 2 R.RKDAGHI chrX@3850    | 3.91E-10 | 0.006839 |
| 11Nov2011 | 20515 | 826.48  | -13.7526 | 2 R.RVPLPEG Splice@chr   | 1.77E-13 | 0        |
| 11Nov2011 | 20351 | 826.97  | -27.9106 | 2 R.RVPLPEG Splice@chr   | 9.28E-14 | 0        |
| 11Nov2011 | 20457 | 826.47  | -25.8785 | 2 R.RVPLPEG Splice@chr   | 9.48E-13 | 0        |
| 11Nov2011 | 20405 | 826.47  | -25.8785 | 2 R.RVPLPEG Splice@chr   | 5.60E-14 | 0        |
| 11Nov2011 | 20576 | 826.97  | -27.9106 | 2 R.RVPLPEG Splice@chr   | 1.77E-13 | 0        |
| 11Nov2011 | 20065 | 826.47  | -25.8785 | 2 R.RVPLPEG Splice@chr   | 1.17E-13 | 0        |
| 11Nov2011 | 20171 | 826.47  | -25.8785 | 2 R.RVPLPEG Splice@chr   | 7.18E-13 | 0        |
| 11Nov2011 | 20226 | 826.48  | -13.7526 | 2 R.RVPLPEG Splice@chr   | 3.91E-13 | 0        |
| 11Nov2011 | 20015 | 826.47  | -25.8785 | 2 R.RVPLPEG Splice@chr   | 5.31E-14 | 0        |
| 11Nov2011 | 20116 | 826.47  | -25.8785 | 2 R.RVPLPEG Splice@chr   | 1.16E-12 | 0        |
| 11Nov2011 | 14327 | 430.76  | 3.408589 | 2 R.SILSEIAK. Splice@chr | 4.59E-10 | 0.009336 |
| 11Nov2011 | 15302 | 430.76  | 3.408589 | 2 R.SILSEIAK. Splice@chr | 4.44E-10 | 0.008903 |
| 11Nov2011 | 13808 | 430.76  | 3.408589 | 2 R.SILSEIAK. Splice@chr | 4.51E-10 | 0.009546 |
| 11Nov2011 | 15231 | 430.76  | 3.408589 | 2 R.SILSEIAK. Splice@chr | 4.71E-10 | 0.008505 |
| 11Nov2011 | 15300 | 430.76  | 3.408589 | 2 R.SILSEIAK. Splice@chr | 4.44E-10 | 0.008382 |
| 11Nov2011 | 30832 | 1171.15 | 17.63055 | 2 A.TCEALGL chr1@2574    | 5.71E-10 | 0.009321 |
| 11Nov2011 | 29944 | 761.75  | 21.82333 | 3 K.IFSVEICLF chr2@8427  | 1.27E-10 | 0.003214 |
| 11Nov2011 | 29255 | 761.75  | 21.82333 | 3 K.IFSVEICLF chr2@8427  | 6.57E-10 | 0.009998 |
| 11Nov2011 | 31075 | 762.08  | 15.96727 | 3 K.IFSVEICLF chr2@8427  | 2.07E-10 | 0.00404  |
| 11Nov2011 | 29713 | 761.75  | 21.82333 | 3 K.IFSVEICLF chr2@8427  | 1.62E-10 | 0.003019 |
| 11Nov2011 | 4260  | 832.46  | 3.817225 | 1 _FIDVPNK. Splice@chr   | 4.67E-10 | 0.005951 |
| 11Nov2011 | 4200  | 832.46  | 3.817225 | 1 _FIDVPNK. Splice@chr   | 3.11E-10 | 0.00339  |
| 11Nov2011 | 23806 | 1133.59 | -6.23448 | 3 K.HQLVSAF Splice@chr   | 1.14E-14 | 0        |
| 11Nov2011 | 23697 | 1133.59 | -6.23448 | 3 K.HQLVSAF Splice@chr   | 1.57E-13 | 0        |
| 11Nov2011 | 23858 | 1133.59 | -6.23448 | 3 K.HQLVSAF Splice@chr   | 3.54E-13 | 0        |
| 11Nov2011 | 23752 | 1133.59 | -6.23448 | 3 K.HQLVSAF Splice@chr   | 6.52E-15 | 0        |
| 11Nov2011 | 23909 | 1133.59 | -6.23448 | 3 K.HQLVSAF Splice@chr   | 8.04E-13 | 0        |
| 11Nov2011 | 22540 | 1133.59 | -6.23448 | 3 K.HQLVSAF Splice@chr   | 1.24E-13 | 0        |
| 11Nov2011 | 22383 | 1133.59 | -6.23448 | 3 K.HQLVSAF Splice@chr   | 3.89E-14 | 0        |
| 11Nov2011 | 22327 | 1133.59 | -6.23448 | 3 K.HQLVSAF Splice@chr   | 2.01E-14 | 0        |
| 11Nov2011 | 22437 | 1133.59 | -6.23448 | 3 K.HQLVSAF Splice@chr   | 1.65E-12 | 0        |
| 11Nov2011 | 22485 | 1133.59 | -6.23448 | 3 K.HQLVSAF Splice@chr   | 6.72E-12 | 1.05E-04 |
| 11Nov2011 | 24777 | 1133.59 | -6.23448 | 3 K.HQLVSAF Splice@chr   | 2.07E-12 | 0        |
| 11Nov2011 | 24832 | 1133.59 | -6.23448 | 3 K.HQLVSAF Splice@chr   | 2.35E-12 | 0        |
| 11Nov2011 | 24622 | 1133.59 | -6.23448 | 3 K.HQLVSAF Splice@chr   | 2.81E-14 | 0        |
| 11Nov2011 | 24711 | 1133.6  | 2.534207 | 3 K.HQLVSAF Splice@chr   | 2.04E-13 | 0        |
| 11Nov2011 | 24336 | 1133.59 | -6.23448 | 3 K.HQLVSAF Splice@chr   | 9.52E-13 | 0        |
| 11Nov2011 | 24239 | 1133.59 | -6.23448 | 3 K.HQLVSAF Splice@chr   | 2.71E-14 | 0        |
| 11Nov2011 | 24395 | 1133.59 | -6.23448 | 3 K.HQLVSAF Splice@chr   | 2.08E-11 | 1.61E-04 |
| 11Nov2011 | 24117 | 1133.59 | -6.23448 | 3 K.HQLVSAF Splice@chr   | 1.45E-14 | 0        |
| 11Nov2011 | 3554  | 851.45  | 27.84704 | 1 R.FAGNSVE chr4@1640    | 2.64E-10 | 0.00651  |
| 11Nov2011 | 28875 | 1066.55 | -19.246  | 2 K.YVSFHPH chrX@4627    | 1.96E-10 | 0.0046   |
| 11Nov2011 | 4660  | 533.29  | 29.21313 | 2 R.FVIESEAN chrX@8195   | 2.78E-10 | 0.006883 |

|           |       |         |          |                         |          |          |
|-----------|-------|---------|----------|-------------------------|----------|----------|
| 11Nov2011 | 2089  | 915.47  | 1.201399 | 1 K.FHEIGGQ chrX@4727   | 3.80E-11 | 3.89E-04 |
| 11Nov2011 | 1978  | 915.47  | 1.201399 | 1 K.FHEIGGQ chrX@4727   | 1.37E-10 | 0.002895 |
| 11Nov2011 | 24020 | 804.91  | -19.029  | 2 K.QYK+14.C Splice@chr | 6.14E-10 | 0.009427 |
| 11Nov2011 | 34594 | 1092.28 | -4.25068 | 3 K.RIHDANR chr1@1249   | 1.29E-10 | 0.002677 |
| 11Nov2011 | 21274 | 690.36  | -4.73875 | 2 R.QIFSQAM chr3@1769   | 2.82E-10 | 0.005201 |
| 11Nov2011 | 21387 | 1001.51 | -23.1202 | 2 K.FAK+14.C Splice@chr | 5.50E-10 | 0.006905 |
| 11Nov2011 | 18328 | 875.42  | -26.6426 | 2 K.KTM+15. chrX@1872   | 2.24E-10 | 0.003691 |
| 11Nov2011 | 25938 | 975.01  | -13.9113 | 2 K.QFENREC chr4@6029   | 1.88E-10 | 0.003358 |
| 11Nov2011 | 5493  | 1132.62 | -9.55324 | 1 K.YHSNKNL chr5@1876   | 2.49E-10 | 0.004964 |
| 11Nov2011 | 27935 | 1153.1  | -9.19461 | 2 R.EEK+14.0 chr4@1237  | 3.79E-10 | 0.007131 |
| 11Nov2011 | 25976 | 877.44  | 11.18505 | 2 K.LVFNNQI chrX@4279   | 4.48E-10 | 0.008911 |
| 11Nov2011 | 25971 | 877.45  | 22.61276 | 2 K.LVFNNQI chrX@4279   | 4.34E-10 | 0.009042 |
| 11Nov2011 | 30955 | 1159.66 | 29.11882 | 2 _KTVKGNL chr5@9058    | 1.89E-10 | 0.00292  |
| 11Nov2011 | 20310 | 1343.72 | -2.04547 | 1 _LFM+15.9 Splice@chr  | 1.86E-10 | 0.002238 |
| 11Nov2011 | 20256 | 1343.72 | -2.04547 | 1 _LFM+15.9 Splice@chr  | 5.03E-10 | 0.006341 |
| 11Nov2011 | 1207  | 528.28  | -29.3693 | 2 R.AATHSLV Splice@chr  | 5.83E-10 | 0.007783 |
| 11Nov2011 | 7697  | 454.75  | 8.810814 | 2 K.TDLAYLG chr4@1549   | 1.02E-10 | 0.001911 |
| 11Nov2011 | 8553  | 454.75  | 8.810814 | 2 K.TDLAYLG chr4@1549   | 5.26E-11 | 0.001188 |
| 11Nov2011 | 1708  | 860.44  | 23.15241 | 1 R.HPPPPCR chr3@5638   | 6.24E-10 | 0.008009 |
| 11Nov2011 | 13509 | 460.78  | 21.93064 | 2 L.SLMSVGv Splice@chr  | 5.37E-10 | 0.00868  |
| 11Nov2011 | 21343 | 1215.61 | 4.623127 | 1 K.PAIADIAL chr3@1256  | 5.50E-10 | 0.006905 |
| 11Nov2011 | 5195  | 516.29  | -20.3315 | 2 R.EAVKVDI chr4@1309   | 2.06E-10 | 0.004303 |
| 11Nov2011 | 33085 | 667.84  | 25.72059 | 4 R.DEDRGf chrX@1437    | 1.29E-10 | 0.002455 |
| 11Nov2011 | 20561 | 938.46  | -6.80618 | 2 V.SSSDHMI chr5@9289   | 6.25E-10 | 0.009397 |
| 11Nov2011 | 20789 | 938.45  | -17.4895 | 2 V.SSSDHMI chr5@9289   | 1.19E-10 | 0.002398 |
| 11Nov2011 | 17869 | 678.71  | 2.461698 | 3 R.KETREKYI chr4@8027  | 4.34E-10 | 0.008329 |
| 11Nov2011 | 10993 | 475.27  | -19.9473 | 2 R.LVSIFWG chr5@1340   | 2.07E-10 | 0.004096 |
| 11Nov2011 | 4825  | 1033.52 | -22.3443 | 1 K.QSLQTFP chr5@4058   | 3.71E-10 | 0.007633 |
| 11Nov2011 | 7956  | 505.93  | 21.00865 | 3 K.DAGFDPI chr1@3577   | 4.33E-10 | 0.009261 |
| 11Nov2011 | 8121  | 505.93  | 21.00865 | 3 K.DAGFDPI chr1@3577   | 3.45E-10 | 0.007252 |
| 11Nov2011 | 9055  | 505.93  | 21.00865 | 3 K.DAGFDPI chr1@3577   | 2.61E-10 | 0.004688 |
| 11Nov2011 | 5141  | 856.48  | -26.3263 | 2 R.FLLRKEK chrX@1581   | 6.08E-10 | 0.009971 |
| 11Nov2011 | 5172  | 856.48  | -26.3263 | 2 R.FLLRKEK chrX@1581   | 3.42E-10 | 0.007161 |
| 11Nov2011 | 22586 | 894.97  | -26.8996 | 2 R.RK+14.01 Splice@chr | 7.88E-10 | 0.009812 |
| 11Nov2011 | 28499 | 917.51  | 5.964791 | 2 _SIMSRLEI Splice@chr  | 3.48E-10 | 0.007252 |
| 11Nov2011 | 32352 | 917.5   | -4.96296 | 2 _SIMSRLEI Splice@chr  | 5.16E-10 | 0.008994 |
| 11Nov2011 | 30499 | 917.51  | 5.964791 | 2 _SIMSRLEI Splice@chr  | 2.20E-10 | 0.003376 |
| 11Nov2011 | 30998 | 917.5   | -4.96296 | 2 _SIMSRLEI Splice@chr  | 5.73E-10 | 0.009321 |
| 11Nov2011 | 19154 | 898.99  | 9.447812 | 2 R.NDYRK+1 Splice@chr  | 3.05E-10 | 0.006464 |
| 11Nov2011 | 3557  | 597.29  | 3.536191 | 2 R.CWNRDK chrX@1392    | 5.06E-10 | 0.008323 |
| 11Nov2011 | 28895 | 1135.56 | 14.02138 | 2 _DMDYAFI Splice@chr   | 4.02E-12 | 6.78E-05 |
| 11Nov2011 | 28940 | 1135.06 | 15.50052 | 2 _DMDYAFI Splice@chr   | 1.61E-12 | 0        |
| 11Nov2011 | 28939 | 1135.56 | 14.02138 | 2 _DMDYAFI Splice@chr   | 4.13E-12 | 6.78E-05 |
| 11Nov2011 | 28905 | 1135.06 | 15.50052 | 2 _DMDYAFI Splice@chr   | 1.77E-11 | 4.39E-04 |
| 11Nov2011 | 27745 | 1135.56 | 14.02138 | 2 _DMDYAFI Splice@chr   | 3.04E-11 | 3.99E-04 |
| 11Nov2011 | 27787 | 1135.06 | 15.50052 | 2 _DMDYAFI Splice@chr   | 4.09E-10 | 0.006238 |
| 11Nov2011 | 27786 | 1135.57 | 22.74042 | 2 _DMDYAFI Splice@chr   | 1.82E-10 | 0.00292  |

|           |       |         |          |                         |          |          |
|-----------|-------|---------|----------|-------------------------|----------|----------|
| 11Nov2011 | 28158 | 1135.56 | 14.02138 | 2 _._DMDYAF Splice@chr  | 1.58E-10 | 0.002962 |
| 11Nov2011 | 18712 | 789.92  | -16.324  | 2 K.YFFARSTI chr2@2735  | 1.20E-10 | 0.003138 |
| 11Nov2011 | 21405 | 683.37  | 23.88288 | 2 K.FWNVLEI chr3@1304   | 4.19E-10 | 0.007183 |
| 11Nov2011 | 6595  | 709.4   | -7.54278 | 2 R.EEKM+15 Splice@chr  | 5.52E-10 | 0.009023 |
| 11Nov2011 | 28339 | 1002.57 | -8.96493 | 1 K.RNWRITF chrX@1024   | 4.16E-10 | 0.009936 |
| 11Nov2011 | 15846 | 762.44  | 8.897657 | 2 R.YISRKIDK chr5@1902  | 3.74E-10 | 0.005855 |
| 11Nov2011 | 25826 | 1090.22 | -23.4477 | 3 I.FPQCSSRF chr4@1067  | 1.93E-10 | 0.002976 |
| 11Nov2011 | 25670 | 881.4   | -15.7795 | 2 W.M+15.95 Splice@chr  | 2.25E-10 | 0.003957 |
| 11Nov2011 | 14732 | 491.95  | -21.2173 | 3 K.LGFLVMK chr2@1107   | 3.56E-10 | 0.006804 |
| 11Nov2011 | 30818 | 988.5   | 2.691119 | 2 K.TVHFCVR chr2@1358   | 2.81E-10 | 0.004941 |
| 11Nov2011 | 17383 | 914     | 0.03462  | 2 K.VGINYQP chr1@8356   | 4.10E-10 | 0.008334 |
| 11Nov2011 | 16724 | 914     | 0.03462  | 2 K.VGINYQP chr1@8356   | 4.67E-10 | 0.007405 |
| 11Nov2011 | 17763 | 914     | 0.03462  | 2 K.VGINYQP chr1@8356   | 6.44E-10 | 0.009914 |
| 11Nov2011 | 17313 | 914     | 0.03462  | 2 K.VGINYQP chr1@8356   | 2.72E-10 | 0.00556  |
| 11Nov2011 | 4696  | 837.45  | -19.6495 | 1 K.TYIVGQR chr4@5607   | 5.37E-10 | 0.008084 |
| 11Nov2011 | 31823 | 786.91  | 9.909762 | 2 K.ERSNFSK Splice@chr  | 9.00E-11 | 0.002131 |
| 11Nov2011 | 31779 | 786.91  | 9.909762 | 2 K.ERSNFSK Splice@chr  | 1.35E-10 | 0.003132 |
| 11Nov2011 | 32023 | 786.92  | 22.65468 | 2 K.ERSNFSK Splice@chr  | 1.06E-10 | 0.001625 |
| 11Nov2011 | 29976 | 986.04  | 13.87982 | 2 R.IETLK+14 chr3@7391  | 2.38E-10 | 0.004705 |
| 11Nov2011 | 1406  | 710.35  | -27.7056 | 2 K.DFLKFFVI chr4@8350  | 3.27E-10 | 0.005945 |
| 11Nov2011 | 1271  | 710.36  | -13.5947 | 2 K.DFLKFFVI chr4@8350  | 2.78E-10 | 0.006883 |
| 11Nov2011 | 20814 | 1054.09 | -16.46   | 2 K.KISFLKVT chr3@8934  | 4.38E-10 | 0.008663 |
| 11Nov2011 | 11642 | 1000.02 | 11.70688 | 2 R.LVSERYG chr2@8997   | 3.39E-10 | 0.007191 |
| 11Nov2011 | 11439 | 999.52  | 13.3868  | 2 R.LVSERYG chr2@8997   | 7.16E-11 | 0.001198 |
| 11Nov2011 | 11429 | 1000.02 | 11.70688 | 2 R.LVSERYG chr2@8997   | 9.29E-11 | 0.001843 |
| 11Nov2011 | 29308 | 1296.68 | -15.0554 | 2 R.QFSDLPV chrX@1500   | 2.39E-10 | 0.004914 |
| 11Nov2011 | 32101 | 1288.15 | -28.1526 | 2 _._CTAVSAS Splice@chr | 3.75E-10 | 0.007079 |
| 11Nov2011 | 35697 | 1107.04 | -2.40061 | 2 R.CIDQFQS chr3@9264   | 4.42E-10 | 0.007207 |
| 11Nov2011 | 19399 | 1137.57 | -6.20429 | 2 M.CIYYNIG chr4@1285   | 1.33E-10 | 0.003537 |
| 11Nov2011 | 11763 | 607.34  | -12.541  | 2 K.ESEPITPII chr1@2075 | 3.87E-11 | 0.001246 |
| 11Nov2011 | 7074  | 471.79  | -5.7044  | 2 K.IKVNFPPI chr2@3034  | 5.16E-10 | 0.008574 |
| 11Nov2011 | 6283  | 471.79  | -5.7044  | 2 K.IKVNFPPI chr2@3034  | 2.37E-10 | 0.004856 |
| 11Nov2011 | 6334  | 471.79  | -5.7044  | 2 K.IKVNFPPI chr2@3034  | 4.69E-10 | 0.009906 |
| 11Nov2011 | 7162  | 471.79  | -5.7044  | 2 K.IKVNFPPI chr2@3034  | 6.29E-10 | 0.009777 |
| 11Nov2011 | 13692 | 819.43  | 6.381564 | 2 K.K+14.016 chr5@9978  | 3.98E-10 | 0.008029 |
| 11Nov2011 | 3323  | 492.25  | -25.9912 | 2 R.VMEPTHI chr5@1078   | 4.51E-11 | 6.31E-04 |
| 11Nov2011 | 33458 | 937.19  | -8.72163 | 4 R.SQVDDVI Splice@chr  | 2.25E-10 | 0.003961 |
| 11Nov2011 | 19828 | 650.33  | -6.06589 | 2 _._WLTRMA chr3@3106   | 3.69E-10 | 0.007582 |
| 11Nov2011 | 31760 | 1189.9  | -25.7262 | 3 R.LEKCGNV chrX@1215   | 1.97E-10 | 0.004601 |
| 11Nov2011 | 22014 | 1275.6  | -25.4649 | 3 R.YSSECPEI Splice@chr | 3.76E-12 | 0        |
| 11Nov2011 | 21642 | 1275.6  | -25.4649 | 3 R.YSSECPEI Splice@chr | 3.88E-11 | 4.62E-04 |
| 11Nov2011 | 22574 | 1275.6  | -25.4649 | 3 R.YSSECPEI Splice@chr | 2.69E-12 | 0        |
| 11Nov2011 | 22639 | 1275.6  | -25.4649 | 3 R.YSSECPEI Splice@chr | 1.83E-10 | 0.00292  |
| 11Nov2011 | 23866 | 1275.6  | -25.4649 | 3 R.YSSECPEI Splice@chr | 1.29E-10 | 0.00292  |
| 11Nov2011 | 22820 | 1275.6  | -25.4649 | 3 R.YSSECPEI Splice@chr | 2.32E-10 | 0.004124 |
| 11Nov2011 | 22872 | 1275.6  | -25.4649 | 3 R.YSSECPEI Splice@chr | 5.03E-10 | 0.00827  |
| 11Nov2011 | 22085 | 795.41  | -17.7192 | 2 R.QELLIASC Splice@chr | 2.69E-10 | 0.004835 |

|           |       |         |          |                         |          |          |
|-----------|-------|---------|----------|-------------------------|----------|----------|
| 11Nov2011 | 21894 | 971.49  | 8.527395 | 2 R.RHHMFP chrX@1147    | 1.35E-10 | 0.002442 |
| 11Nov2011 | 21839 | 971.49  | 8.527395 | 2 R.RHHMFP chrX@1147    | 3.59E-12 | 3.31E-04 |
| 11Nov2011 | 7792  | 537.77  | -21.4519 | 2 M.YALTYDI chrX@1428   | 5.07E-10 | 0.008898 |
| 11Nov2011 | 25251 | 809.41  | -3.53009 | 4 K.NSGNDKI chr5@2437   | 5.43E-10 | 0.009095 |
| 11Nov2011 | 31782 | 870.82  | -28.8963 | 3 K.FKIFAIK+ Splice@chr | 2.78E-10 | 0.004461 |
| 11Nov2011 | 3025  | 710.86  | 21.23823 | 2 R.DSTQKW chr3@1337    | 1.39E-10 | 0.002285 |
| 11Nov2011 | 3350  | 710.86  | 21.23823 | 2 R.DSTQKW chr3@1337    | 1.76E-10 | 0.003147 |
| 11Nov2011 | 2718  | 710.86  | 21.23823 | 2 R.DSTQKW chr3@1337    | 2.79E-10 | 0.002979 |
| 11Nov2011 | 3023  | 710.86  | 21.23823 | 2 R.DSTQKW chr3@1337    | 1.59E-10 | 0.001628 |
| 11Nov2011 | 2967  | 710.86  | 21.23823 | 2 R.DSTQKW chr3@1337    | 4.26E-11 | 4.85E-04 |
| 11Nov2011 | 2682  | 710.86  | 21.23823 | 2 R.DSTQKW chr3@1337    | 4.13E-11 | 4.85E-04 |
| 11Nov2011 | 3186  | 710.86  | 21.23823 | 2 R.DSTQKW chr3@1337    | 7.55E-11 | 0.002025 |
| 11Nov2011 | 14534 | 702.39  | -26.4276 | 2 _FLNVVQM chrX@1101    | 5.06E-10 | 0.00944  |
| 11Nov2011 | 30398 | 1016.62 | 26.92414 | 1 _GGICLKQ chr3@9720    | 4.14E-10 | 0.008596 |
| 11Nov2011 | 4660  | 486.78  | -7.03611 | 2 K.SLRGTVP chr1@1504   | 2.34E-10 | 0.003723 |
| 11Nov2011 | 32789 | 812.39  | -10.2403 | 1 K.YSEASVR chr3@1231   | 2.01E-10 | 0.003086 |
| 11Nov2011 | 2530  | 444.25  | -3.23598 | 2 R.AELSSRPI chr3@8104  | 3.50E-10 | 0.005848 |
| 11Nov2011 | 2363  | 444.25  | -3.23598 | 2 R.AELSSRPI chr3@8104  | 6.33E-10 | 0.009991 |
| 11Nov2011 | 33914 | 1114.62 | -11.2671 | 2 K.KNQIK+1 chr1@2528   | 3.97E-10 | 0.006558 |
| 11Nov2011 | 3258  | 559.32  | -14.3208 | 2 K.SRNFAQKII chr5@1787 | 1.74E-10 | 0.003358 |
| 11Nov2011 | 3290  | 559.32  | -14.3208 | 2 K.SRNFAQKII chr5@1787 | 1.85E-10 | 0.003793 |
| 11Nov2011 | 3361  | 559.32  | -14.3208 | 2 K.SRNFAQKII chr5@1787 | 1.38E-10 | 0.002328 |
| 11Nov2011 | 12437 | 876.45  | -17.8219 | 2 E.RSKFTVE chr2@1154   | 7.93E-11 | 0.00127  |
| 11Nov2011 | 36442 | 1114.61 | 14.53956 | 1 K.QINPSQC Splice@chr  | 6.03E-10 | 0.009801 |
| 11Nov2011 | 26501 | 1066.02 | -29.2269 | 2 R.SSK+14.0 chr5@1184  | 5.87E-10 | 0.009032 |
| 11Nov2011 | 24363 | 889.95  | -19.8868 | 2 K.RSSVHTE chr2@8442   | 1.48E-10 | 0.002946 |
| 11Nov2011 | 27042 | 889.95  | -19.8868 | 2 K.RSSVHTE chr2@8442   | 1.72E-10 | 0.003641 |
| 11Nov2011 | 30947 | 994.49  | -4.70109 | 2 _CCTSSPAI chr2@1118   | 5.73E-10 | 0.009267 |
| 11Nov2011 | 6636  | 630.85  | 9.01229  | 2 R.QMLQNC Splice@chr   | 2.48E-10 | 0.003887 |
| 11Nov2011 | 25159 | 997.49  | 24.91262 | 2 E.NWELEYF Splice@chr  | 3.88E-14 | 0        |
| 11Nov2011 | 26926 | 1090.22 | -17.6932 | 3 R.VSSVHFV Splice@chr  | 3.62E-10 | 0.006971 |
| 11Nov2011 | 26787 | 787.46  | 9.778731 | 2 R.VLPNHLC chr2@3612   | 3.49E-10 | 0.006031 |
| 11Nov2011 | 5208  | 796.43  | -12.3219 | 2 K.FLKLEYFS chr5@2005  | 5.81E-10 | 0.008983 |
| 11Nov2011 | 2724  | 888.52  | 29.02223 | 1 R.YNLHTLK Splice@chr  | 4.55E-10 | 0.007348 |
| 11Nov2011 | 2727  | 888.52  | 29.02223 | 1 R.YNLHTLK Splice@chr  | 4.59E-10 | 0.007909 |
| 11Nov2011 | 3007  | 888.52  | 29.02223 | 1 R.YNLHTLK Splice@chr  | 5.04E-10 | 0.007941 |
| 11Nov2011 | 3041  | 888.52  | 29.02223 | 1 R.YNLHTLK Splice@chr  | 4.55E-10 | 0.008545 |
| 11Nov2011 | 23207 | 737.71  | -20.4357 | 3 K.TTK+14.0 Splice@chr | 1.03E-10 | 0.002073 |
| 11Nov2011 | 34027 | 1147.93 | -24.4678 | 3 R.FQSAALK chr2@2918   | 2.99E-10 | 0.005551 |
| 11Nov2011 | 20868 | 1049.52 | 5.532542 | 3 G.DQSVDSI chr4@9163   | 7.75E-11 | 0.001416 |
| 11Nov2011 | 5340  | 948.48  | 18.96187 | 1 R.ENKENW chr3@9915    | 4.54E-10 | 0.009277 |
| 11Nov2011 | 5709  | 948.48  | 18.96187 | 1 R.ENKENW chr3@9915    | 5.18E-10 | 0.009634 |
| 11Nov2011 | 4541  | 948.48  | 18.96187 | 1 R.ENKENW chr3@9915    | 6.43E-10 | 0.008089 |
| 11Nov2011 | 23094 | 1144.09 | 21.82295 | 2 K.NSRFLSK- chr1@8068  | 5.90E-10 | 0.009566 |
| 11Nov2011 | 23081 | 1144.09 | 21.82295 | 2 K.NSRFLSK- chr1@8068  | 3.47E-10 | 0.005693 |
| 11Nov2011 | 12084 | 713.38  | -5.39773 | 2 L.QMTMAC chr4@7860    | 1.52E-10 | 0.003398 |
| 11Nov2011 | 1012  | 428.25  | 27.35814 | 2 R.SSPSKPPI chr2@7508  | 1.22E-10 | 0.00247  |

|           |       |         |          |                         |          |          |
|-----------|-------|---------|----------|-------------------------|----------|----------|
| 11Nov2011 | 31997 | 1095.12 | 7.921547 | 2 K.CTTNISLL Splice@chr | 3.07E-10 | 0.005836 |
| 11Nov2011 | 22209 | 920.5   | 12.81135 | 2 R.KM+15.9 Splice@chr  | 3.19E-10 | 0.00694  |
| 11Nov2011 | 26922 | 799.94  | -28.2439 | 2 _RK+14.01 chrX@6711   | 5.62E-10 | 0.009119 |
| 11Nov2011 | 10105 | 430.72  | -18.1094 | 2 R.SSTAGNP Splice@chr  | 1.15E-12 | 0        |
| 11Nov2011 | 25815 | 1160.6  | 4.932211 | 3 R.NTRDQD chr4@3074    | 2.98E-10 | 0.006464 |
| 11Nov2011 | 6916  | 532.27  | -0.40046 | 2 _TQRNSAT chr5@1430    | 2.55E-10 | 0.005784 |
| 11Nov2011 | 28909 | 1213.62 | -5.31148 | 2 K.VQHHLFE Splice@chr  | 3.83E-15 | 0        |
| 11Nov2011 | 30767 | 746.38  | 19.89857 | 2 R.DECSQNI Splice@chr  | 1.06E-10 | 0.002315 |
| 11Nov2011 | 33498 | 1062.1  | 10.38858 | 2 R.QICPSRLI chr1@1061  | 3.66E-10 | 0.006209 |
| 11Nov2011 | 33857 | 1062.1  | 10.38858 | 2 R.QICPSRLI chr1@1061  | 2.55E-10 | 0.004899 |
| 11Nov2011 | 33813 | 1062.09 | 0.950568 | 2 R.QICPSRLI chr1@1061  | 2.09E-10 | 0.00404  |
| 11Nov2011 | 6805  | 626.31  | -29.366  | 4 A.VNTASRI chr1@2225   | 5.65E-10 | 0.009119 |
| 11Nov2011 | 34877 | 955.53  | -7.58786 | 3 K.NSTNLK+ chr2@7366   | 5.79E-10 | 0.009317 |
| 11Nov2011 | 32321 | 934.53  | -16.5464 | 3 K.AKRMKKI chr1@6827   | 5.22E-10 | 0.009687 |
| 11Nov2011 | 31180 | 859.12  | -11.5699 | 3 R.TINDNM- Splice@chr  | 5.91E-11 | 0.00142  |
| 11Nov2011 | 29633 | 859.13  | 0.18967  | 3 R.TINDNM- Splice@chr  | 3.71E-10 | 0.005685 |
| 11Nov2011 | 29745 | 1147.58 | -5.32324 | 2 H.VPK+14.1 Splice@chr | 1.68E-10 | 0.003918 |
| 11Nov2011 | 22490 | 648.02  | 16.91749 | 3 R.ISNMTNL chr4@2735   | 3.38E-10 | 0.006298 |
| 11Nov2011 | 27502 | 633.34  | -12.1215 | 2 _DLWIFSV chr3@1350    | 3.81E-10 | 0.006684 |
| 11Nov2011 | 7679  | 572.35  | 20.05007 | 2 R.QKAPHRI chr3@5692   | 3.32E-11 | 7.84E-04 |
| 11Nov2011 | 18463 | 687.41  | 21.43028 | 2 E.M+15.99 chr2@8546   | 3.74E-10 | 0.007764 |
| 11Nov2011 | 18517 | 687.41  | 21.43028 | 2 E.M+15.99 chr2@8546   | 3.79E-10 | 0.007891 |
| 11Nov2011 | 19755 | 687.41  | 21.43028 | 2 E.M+15.99 chr2@8546   | 1.48E-10 | 0.003052 |
| 11Nov2011 | 19811 | 687.41  | 21.43028 | 2 E.M+15.99 chr2@8546   | 2.41E-10 | 0.00492  |
| 11Nov2011 | 19929 | 687.41  | 21.43028 | 2 E.M+15.99 chr2@8546   | 9.17E-11 | 0.002131 |
| 11Nov2011 | 10475 | 878.42  | -2.12165 | 2 K.WLMENC chr5@7445    | 1.24E-11 | 5.58E-04 |
| 11Nov2011 | 10405 | 878.43  | 9.293137 | 2 K.WLMENC chr5@7445    | 2.40E-11 | 0.001036 |
| 11Nov2011 | 10400 | 878.43  | 9.293137 | 2 K.WLMENC chr5@7445    | 1.27E-11 | 3.17E-04 |
| 11Nov2011 | 9947  | 878.42  | -2.12165 | 2 K.WLMENC chr5@7445    | 6.12E-11 | 0.00143  |
| 11Nov2011 | 34067 | 986.54  | 25.93316 | 2 _FWCSKKI chr4@1240    | 4.38E-10 | 0.00753  |
| 11Nov2011 | 16182 | 866.09  | -22.0907 | 3 K.VSGAELLI chr1@1495  | 2.72E-10 | 0.005272 |
| 11Nov2011 | 5923  | 756.42  | -22.2995 | 1 R.PLSAAAA chr5@3132   | 5.93E-10 | 0.009614 |
| 11Nov2011 | 5872  | 756.42  | -22.2995 | 1 R.PLSAAAA chr5@3132   | 3.96E-10 | 0.006508 |
| 11Nov2011 | 5955  | 756.43  | -9.04908 | 1 R.PLSAAAA chr5@3132   | 4.82E-10 | 0.00916  |
| 11Nov2011 | 5848  | 756.43  | -9.04908 | 1 R.PLSAAAA chr5@3132   | 3.70E-10 | 0.007582 |
| 11Nov2011 | 32311 | 903.5   | -10.6403 | 3 R.MFPK+14 chrX@1688   | 5.26E-10 | 0.009192 |
| 11Nov2011 | 16765 | 978.43  | -7.83972 | 2 R.RRCCRCV chr3@6695   | 5.29E-10 | 0.00895  |
| 11Nov2011 | 27707 | 536.27  | 6.320391 | 5 _EFKNSSIK chr2@1501   | 4.77E-10 | 0.007976 |
| 11Nov2011 | 30962 | 1272.28 | 27.03865 | 3 K.FAFADEE Splice@chr  | 1.80E-12 | 0        |
| 11Nov2011 | 30910 | 1272.28 | 27.03865 | 3 K.FAFADEE Splice@chr  | 2.69E-13 | 0        |
| 11Nov2011 | 31565 | 1272.28 | 27.03865 | 3 K.FAFADEE Splice@chr  | 1.83E-13 | 0        |
| 11Nov2011 | 25363 | 954.46  | 24.98958 | 4 K.FAFADEE Splice@chr  | 2.75E-13 | 0        |
| 11Nov2011 | 25403 | 1272.28 | 27.03865 | 3 K.FAFADEE Splice@chr  | 1.57E-13 | 0        |
| 11Nov2011 | 10196 | 710.91  | -12.5168 | 2 R.TIAVWAI chr1@1292   | 4.87E-10 | 0.009707 |
| 11Nov2011 | 5940  | 877.44  | -26.3234 | 1 R.IDDKTSAI chr5@8738  | 2.04E-10 | 0.003272 |
| 11Nov2011 | 5895  | 877.44  | -26.3234 | 1 R.IDDKTSAI chr5@8738  | 2.08E-10 | 0.004707 |
| 11Nov2011 | 5926  | 439.23  | -12.3957 | 2 R.IDDKTSAI chr5@8738  | 2.92E-10 | 0.006415 |

|           |       |         |          |                         |          |          |
|-----------|-------|---------|----------|-------------------------|----------|----------|
| 11Nov2011 | 5983  | 439.23  | -12.3957 | 2 R.IDDKTSAI chr5@8738  | 3.84E-10 | 0.007908 |
| 11Nov2011 | 5875  | 439.23  | -12.3957 | 2 R.IDDKTSAI chr5@8738  | 3.71E-10 | 0.007582 |
| 11Nov2011 | 35131 | 1217.26 | -6.60861 | 3 R.CFLTLLQ\ Splice@chr | 3.26E-10 | 0.005945 |
| 11Nov2011 | 9730  | 1008.49 | 11.51069 | 1 K.CSKNGSII chr5@1832  | 3.34E-10 | 0.006196 |
| 11Nov2011 | 4398  | 972.55  | -25.2781 | 1 R.QMGKLP chr1@1111    | 6.20E-11 | 0.001198 |
| 11Nov2011 | 34468 | 1155.59 | 29.18146 | 2 R.AWQALL chr2@1382    | 2.10E-10 | 0.003945 |
| 11Nov2011 | 32712 | 1156.09 | 27.7286  | 2 R.AWQALL chr2@1382    | 1.61E-10 | 0.003748 |
| 11Nov2011 | 23567 | 831.45  | -1.72693 | 2 R.NTRNQLf chrX@7297   | 1.13E-10 | 0.003024 |
| 11Nov2011 | 23626 | 831.45  | -1.72693 | 2 R.NTRNQLf chrX@7297   | 1.85E-10 | 0.004059 |
| 11Nov2011 | 25590 | 831.45  | -1.72693 | 2 R.NTRNQLf chrX@7297   | 2.60E-10 | 0.004309 |
| 11Nov2011 | 25069 | 831.45  | -1.72693 | 2 R.NTRNQLf chrX@7297   | 9.12E-11 | 0.002715 |
| 11Nov2011 | 25123 | 831.45  | -1.72693 | 2 R.NTRNQLf chrX@7297   | 4.28E-10 | 0.008597 |
| 11Nov2011 | 22772 | 831.45  | -1.72693 | 2 R.NTRNQLf chrX@7297   | 9.61E-11 | 0.001749 |
| 11Nov2011 | 23600 | 831.45  | -1.72693 | 2 R.NTRNQLf chrX@7297   | 1.50E-10 | 0.003537 |
| 11Nov2011 | 23133 | 831.45  | -1.72693 | 2 R.NTRNQLf chrX@7297   | 3.83E-10 | 0.007503 |
| 11Nov2011 | 25342 | 831.45  | -1.72693 | 2 R.NTRNQLf chrX@7297   | 4.83E-10 | 0.008647 |
| 11Nov2011 | 25396 | 831.45  | -1.72693 | 2 R.NTRNQLf chrX@7297   | 3.28E-10 | 0.00625  |
| 11Nov2011 | 25534 | 831.45  | -1.72693 | 2 R.NTRNQLf chrX@7297   | 2.51E-10 | 0.004899 |
| 11Nov2011 | 25593 | 831.45  | -1.72693 | 2 R.NTRNQLf chrX@7297   | 4.00E-10 | 0.006935 |
| 11Nov2011 | 24619 | 831.45  | -1.72693 | 2 R.NTRNQLf chrX@7297   | 9.55E-11 | 0.001825 |
| 11Nov2011 | 25699 | 831.45  | -1.72693 | 2 R.NTRNQLf chrX@7297   | 3.35E-10 | 0.005542 |
| 11Nov2011 | 25252 | 831.45  | -1.72693 | 2 R.NTRNQLf chrX@7297   | 3.32E-10 | 0.006141 |
| 11Nov2011 | 25315 | 831.45  | -1.72693 | 2 R.NTRNQLf chrX@7297   | 1.90E-10 | 0.004065 |
| 11Nov2011 | 21432 | 831.45  | -1.72693 | 2 R.NTRNQLf chrX@7297   | 3.05E-10 | 0.007165 |
| 11Nov2011 | 16906 | 894.41  | 13.57006 | 2 _FSDDDVT Splice@chr   | 2.45E-10 | 0.005388 |
| 11Nov2011 | 16682 | 893.91  | 15.44868 | 2 _FSDDDVT Splice@chr   | 3.53E-10 | 0.006787 |
| 11Nov2011 | 18200 | 893.91  | 15.44868 | 2 _FSDDDVT Splice@chr   | 1.43E-10 | 0.002945 |
| 11Nov2011 | 18026 | 894.41  | 13.57006 | 2 _FSDDDVT Splice@chr   | 5.55E-10 | 0.009333 |
| 11Nov2011 | 17372 | 893.91  | 15.44868 | 2 _FSDDDVT Splice@chr   | 4.66E-10 | 0.007348 |
| 11Nov2011 | 18194 | 894.41  | 13.57006 | 2 _FSDDDVT Splice@chr   | 2.60E-10 | 0.004943 |
| 11Nov2011 | 18349 | 893.91  | 15.44868 | 2 _FSDDDVT Splice@chr   | 4.72E-10 | 0.007914 |
| 11Nov2011 | 17624 | 893.91  | 15.44868 | 2 _FSDDDVT Splice@chr   | 4.15E-10 | 0.007154 |
| 11Nov2011 | 17952 | 894.4   | 2.427875 | 2 _FSDDDVT Splice@chr   | 2.75E-11 | 4.55E-04 |
| 11Nov2011 | 18021 | 894.4   | 2.427875 | 2 _FSDDDVT Splice@chr   | 4.61E-12 | 0        |
| 11Nov2011 | 32278 | 958.01  | -16.0594 | 4 K.K+14.016 chr3@3606  | 4.92E-10 | 0.007904 |
| 11Nov2011 | 8743  | 507.3   | -7.17287 | 2 K.IVEIDVLG chr5@1932  | 7.69E-11 | 0.001521 |
| 11Nov2011 | 9009  | 507.3   | -7.17287 | 2 K.IVEIDVLG chr5@1932  | 4.30E-10 | 0.008982 |
| 11Nov2011 | 9059  | 507.3   | -7.17287 | 2 K.IVEIDVLG chr5@1932  | 3.90E-10 | 0.008011 |
| 11Nov2011 | 8971  | 507.3   | -7.17287 | 2 K.IVEIDVLG chr5@1932  | 1.86E-10 | 0.003623 |
| 11Nov2011 | 9028  | 507.3   | -7.17287 | 2 K.IVEIDVLG chr5@1932  | 1.49E-10 | 0.002946 |
| 11Nov2011 | 9758  | 507.3   | -7.17287 | 2 K.IVEIDVLG chr5@1932  | 8.08E-11 | 0.001476 |
| 11Nov2011 | 9875  | 507.3   | -7.17287 | 2 K.IVEIDVLG chr5@1932  | 4.93E-10 | 0.009344 |
| 11Nov2011 | 31833 | 805.41  | -27.4665 | 1 R.GGKSFP C Splice@chr | 1.14E-10 | 0.001731 |
| 11Nov2011 | 32681 | 1042.89 | 9.787056 | 3 F.SMKEIKN chr2@1118   | 5.50E-10 | 0.009287 |
| 11Nov2011 | 4650  | 479.3   | -0.44486 | 2 K.LKVNGN/ chrX@8246   | 4.06E-10 | 0.009715 |
| 11Nov2011 | 6785  | 463.24  | 9.837402 | 2 K.NTSEIFSK chr3@1171  | 6.53E-10 | 0.008238 |
| 11Nov2011 | 31332 | 1258.62 | -11.5506 | 2 K.K+14.016 chr3@7897  | 5.36E-10 | 0.008981 |

|           |       |         |          |                         |          |          |
|-----------|-------|---------|----------|-------------------------|----------|----------|
| 11Nov2011 | 202   | 549.29  | -12.2451 | 2 _..HKNFPD/ chr3@1042  | 4.13E-10 | 0.004711 |
| 11Nov2011 | 31270 | 1027.59 | -24.0001 | 2 I.KNELKSKA chrX@6127  | 3.08E-10 | 0.005836 |
| 11Nov2011 | 31700 | 1027.59 | -24.0001 | 2 I.KNELKSKA chrX@6127  | 2.35E-10 | 0.004705 |
| 11Nov2011 | 31911 | 1027.59 | -24.0001 | 2 I.KNELKSKA chrX@6127  | 4.96E-10 | 0.007941 |
| 11Nov2011 | 31956 | 1027.59 | -24.0001 | 2 I.KNELKSKA chrX@6127  | 6.40E-10 | 0.009914 |
| 11Nov2011 | 18929 | 685.88  | 4.188613 | 2 K.IVPGGGA chrX@1570   | 2.44E-17 | 0        |
| 11Nov2011 | 20436 | 685.88  | 4.188613 | 2 K.IVPGGGA chrX@1570   | 1.07E-13 | 0        |
| 11Nov2011 | 20488 | 685.88  | 4.188613 | 2 K.IVPGGGA chrX@1570   | 1.18E-14 | 0        |
| 11Nov2011 | 20215 | 685.88  | 4.188613 | 2 K.IVPGGGA chrX@1570   | 1.88E-17 | 0        |
| 11Nov2011 | 18315 | 685.88  | 4.188613 | 2 K.IVPGGGA chrX@1570   | 4.53E-19 | 0        |
| 11Nov2011 | 18264 | 685.88  | 4.188613 | 2 K.IVPGGGA chrX@1570   | 4.01E-15 | 0        |
| 11Nov2011 | 18970 | 685.88  | 4.188613 | 2 K.IVPGGGA chrX@1570   | 3.16E-12 | 0        |
| 11Nov2011 | 18663 | 685.88  | 4.188613 | 2 K.IVPGGGA chrX@1570   | 9.09E-17 | 0        |
| 11Nov2011 | 18607 | 685.88  | 4.188613 | 2 K.IVPGGGA chrX@1570   | 1.56E-11 | 0        |
| 11Nov2011 | 20333 | 685.88  | 4.188613 | 2 K.IVPGGGA chrX@1570   | 3.26E-15 | 0        |
| 11Nov2011 | 20273 | 685.88  | 4.188613 | 2 K.IVPGGGA chrX@1570   | 4.70E-17 | 0        |
| 11Nov2011 | 20528 | 685.88  | 4.188613 | 2 K.IVPGGGA chrX@1570   | 4.58E-19 | 0        |
| 11Nov2011 | 20469 | 685.88  | 4.188613 | 2 K.IVPGGGA chrX@1570   | 4.53E-19 | 0        |
| 11Nov2011 | 19599 | 685.88  | 4.188613 | 2 K.IVPGGGA chrX@1570   | 4.53E-19 | 0        |
| 11Nov2011 | 20505 | 685.88  | 4.188613 | 2 K.IVPGGGA chrX@1570   | 5.35E-18 | 0        |
| 11Nov2011 | 20620 | 685.88  | 4.188613 | 2 K.IVPGGGA chrX@1570   | 4.10E-17 | 0        |
| 11Nov2011 | 20116 | 685.88  | 4.188613 | 2 K.IVPGGGA chrX@1570   | 1.58E-14 | 0        |
| 11Nov2011 | 20172 | 685.88  | 4.188613 | 2 K.IVPGGGA chrX@1570   | 4.53E-19 | 0        |
| 11Nov2011 | 20234 | 685.88  | 4.188613 | 2 K.IVPGGGA chrX@1570   | 3.60E-17 | 0        |
| 11Nov2011 | 17342 | 685.88  | 4.188613 | 2 K.IVPGGGA chrX@1570   | 4.81E-13 | 0        |
| 11Nov2011 | 1835  | 734.42  | 17.80957 | 2 K.KKDTDKS Splice@chr  | 1.34E-10 | 0.002209 |
| 11Nov2011 | 32098 | 980.48  | -7.04314 | 3 K.SGTIFDNI Splice@chr | 1.56E-11 | 3.80E-04 |
| 11Nov2011 | 31057 | 980.48  | -7.04314 | 3 K.SGTIFDNI Splice@chr | 2.20E-10 | 0.004799 |
| 11Nov2011 | 812   | 474.27  | 3.423531 | 2 K.RAVKACN chr5@7001   | 2.52E-10 | 0.004401 |
| 11Nov2011 | 34543 | 891.5   | 25.29224 | 2 N.LEESYLIA chr5@1087  | 2.54E-10 | 0.004373 |
| 11Nov2011 | 6241  | 685.37  | -27.0225 | 2 K.ISTQTHIC chr4@7638  | 2.09E-10 | 0.00343  |
| 11Nov2011 | 6298  | 685.37  | -27.0225 | 2 K.ISTQTHIC chr4@7638  | 3.30E-10 | 0.005277 |
| 11Nov2011 | 6216  | 685.38  | -12.3964 | 2 K.ISTQTHIC chr4@7638  | 3.52E-10 | 0.007322 |
| 11Nov2011 | 5737  | 685.38  | -12.3964 | 2 K.ISTQTHIC chr4@7638  | 1.91E-10 | 0.003761 |
| 11Nov2011 | 5681  | 685.37  | -27.0225 | 2 K.ISTQTHIC chr4@7638  | 8.71E-11 | 0.001636 |
| 11Nov2011 | 5773  | 685.37  | -27.0225 | 2 K.ISTQTHIC chr4@7638  | 4.63E-10 | 0.007348 |
| 11Nov2011 | 6297  | 685.37  | -27.0225 | 2 K.ISTQTHIC chr4@7638  | 5.50E-10 | 0.009187 |
| 11Nov2011 | 6241  | 685.37  | -27.0225 | 2 K.ISTQTHIC chr4@7638  | 4.45E-10 | 0.00763  |
| 11Nov2011 | 6351  | 685.37  | -27.0225 | 2 K.ISTQTHIC chr4@7638  | 2.25E-10 | 0.003961 |
| 11Nov2011 | 6412  | 685.38  | -12.3964 | 2 K.ISTQTHIC chr4@7638  | 2.32E-10 | 0.00491  |
| 11Nov2011 | 6357  | 685.37  | -27.0225 | 2 K.ISTQTHIC chr4@7638  | 1.32E-10 | 0.002881 |
| 11Nov2011 | 9121  | 866.47  | -13.5535 | 1 R.TTAIGFG, chr1@1378  | 2.38E-10 | 0.004856 |
| 11Nov2011 | 8629  | 866.46  | -25.062  | 1 R.TTAIGFG, chr1@1378  | 3.12E-10 | 0.007238 |
| 11Nov2011 | 19482 | 794.39  | -11.3202 | 1 K.GGGRFGI chr4@1108   | 9.09E-11 | 0.002594 |
| 11Nov2011 | 23381 | 1110.04 | -27.8308 | 2 L.LHHHRVL Splice@chr  | 1.00E-10 | 0.001973 |
| 11Nov2011 | 23001 | 1110.04 | -27.8308 | 2 L.LHHHRVL Splice@chr  | 2.25E-10 | 0.004799 |
| 11Nov2011 | 19014 | 1044.49 | -7.55059 | 1 R.HRETEPN chr1@3250   | 3.72E-10 | 0.007248 |

|           |       |         |          |                         |          |          |
|-----------|-------|---------|----------|-------------------------|----------|----------|
| 11Nov2011 | 19245 | 684.38  | 29.27447 | 2 K.NYCKPVK chrX@135    | 2.74E-10 | 0.00556  |
| 11Nov2011 | 5729  | 971.56  | 2.079638 | 1 R.NGQLNRI chr4@692    | 3.99E-10 | 0.008175 |
| 11Nov2011 | 7118  | 636.34  | -9.79885 | 2 R.SK+14.01 chrX@140   | 1.99E-10 | 0.003731 |
| 11Nov2011 | 27958 | 805.95  | -19.6873 | 2 R.FLIKSELEI chr3@608  | 3.78E-10 | 0.007856 |
| 11Nov2011 | 6181  | 496.77  | 18.30342 | 2 R.NGRSMT Splice@chr   | 1.95E-10 | 0.002319 |
| 11Nov2011 | 12600 | 472.76  | -28.4627 | 4 K.KWLGRM chr5@109     | 3.54E-10 | 0.006551 |
| 11Nov2011 | 12620 | 472.76  | -28.4627 | 4 K.KWLGRM chr5@109     | 1.23E-10 | 0.002867 |
| 11Nov2011 | 19111 | 682.88  | -29.0653 | 2 K.RIAQVSK chr4@148    | 1.85E-10 | 0.003553 |
| 11Nov2011 | 21031 | 682.88  | -29.0653 | 2 K.RIAQVSK chr4@148    | 3.74E-10 | 0.006147 |
| 11Nov2011 | 8948  | 779.4   | 7.762831 | 1 K.ETSFAPK. chr4@936   | 5.26E-10 | 0.008803 |
| 11Nov2011 | 8993  | 779.41  | 20.54406 | 1 K.ETSFAPK. chr4@936   | 4.08E-10 | 0.007955 |
| 11Nov2011 | 22588 | 778.44  | 25.41598 | 2 R.FWRGSRI chr2@148    | 1.71E-10 | 0.003147 |
| 11Nov2011 | 3950  | 732.41  | -27.8473 | 2 K.ELKGTGC chr5@732    | 1.32E-10 | 0.003537 |
| 11Nov2011 | 19201 | 855.48  | -23.9056 | 2 _RMAFSK+ chr2@725     | 5.08E-10 | 0.007941 |
| 11Nov2011 | 1259  | 435.27  | 28.07524 | 2 R.FLLHGGP chrX@739    | 1.20E-10 | 0.003146 |
| 11Nov2011 | 440   | 890.47  | -8.65343 | 1 R.SSTPQLTI Splice@chr | 3.02E-10 | 0.004443 |
| 11Nov2011 | 16360 | 1010.54 | -6.04585 | 2 _M+15.99 chr1@113     | 4.28E-10 | 0.006571 |
| 11Nov2011 | 5022  | 588.31  | -29.2771 | 2 R.KEISSGTT chr1@383   | 4.50E-10 | 0.005713 |
| 11Nov2011 | 20897 | 816.94  | -8.15359 | 2 G.KSLANNI Splice@chr  | 5.68E-10 | 0.009429 |
| 11Nov2011 | 15255 | 954.44  | -18.1567 | 2 C.QREEIEY( Splice@chr | 1.67E-10 | 0.003317 |
| 11Nov2011 | 3008  | 440.26  | -14.0476 | 2 _VSLAHVP chr4@379     | 2.26E-10 | 0.003741 |
| 11Nov2011 | 29326 | 1336.11 | -14.0802 | 2 K.DAGGNH chr4@721     | 2.38E-12 | 2.06E-04 |
| 11Nov2011 | 29547 | 1336.61 | -15.3366 | 2 K.DAGGNH chr4@721     | 8.15E-11 | 0.001533 |
| 11Nov2011 | 9179  | 927.96  | 0.363502 | 2 _ELQFHRII Splice@chr  | 2.44E-10 | 0.005388 |
| 11Nov2011 | 9859  | 673.32  | -3.13278 | 2 R.QEM+15. chr3@102    | 1.02E-10 | 0.002189 |
| 11Nov2011 | 9760  | 673.32  | -3.13278 | 2 R.QEM+15. chr3@102    | 3.27E-10 | 0.00625  |
| 11Nov2011 | 8253  | 673.33  | 11.76686 | 2 R.QEM+15. chr3@102    | 3.98E-10 | 0.00957  |
| 11Nov2011 | 22664 | 784.93  | -12.0354 | 2 K.M+15.99 chr1@245    | 5.51E-10 | 0.008839 |
| 11Nov2011 | 4072  | 531.29  | -9.73299 | 2 R.DLWETLF chr5@187    | 3.28E-10 | 0.004892 |
| 11Nov2011 | 26283 | 667.34  | -10.8609 | 2 K.CTLINELN Splice@chr | 2.39E-10 | 0.005543 |
| 11Nov2011 | 12244 | 425.81  | -19.9794 | 5 R.KCDQVV( chr2@747    | 2.62E-10 | 0.004309 |
| 11Nov2011 | 36101 | 828.02  | 15.72007 | 4 K.NREKIDF( chr3@107   | 5.75E-10 | 0.009688 |
| 11Nov2011 | 23504 | 1380.71 | -25.8958 | 1 K.ISFGTEKE chr2@188   | 5.94E-10 | 0.009284 |
| 11Nov2011 | 26582 | 927.5   | -16.1144 | 2 R.RWPRPL( chr2@341    | 2.11E-10 | 0.003861 |
| 11Nov2011 | 2608  | 585.41  | 23.49963 | 2 K.KVK+14.( chrX@817   | 4.78E-10 | 0.009452 |
| 11Nov2011 | 17149 | 1344.68 | 23.62111 | 1 _NSSFGR Splice@chr    | 2.56E-10 | 0.002812 |
| 11Nov2011 | 27014 | 980.05  | -22.3594 | 2 K.K+14.016 chrX@380   | 1.33E-10 | 0.003389 |
| 11Nov2011 | 29708 | 980.05  | -22.3594 | 2 K.K+14.016 chrX@380   | 1.57E-10 | 0.003488 |
| 11Nov2011 | 28468 | 980.05  | -22.3594 | 2 K.K+14.016 chrX@380   | 5.28E-11 | 0.00143  |
| 11Nov2011 | 34979 | 1160.94 | 14.10225 | 3 _K+14.016 Splice@chr  | 3.02E-12 | 6.78E-05 |
| 11Nov2011 | 3253  | 586.32  | 16.64871 | 2 K.CNFKAKF chr5@522    | 7.96E-11 | 0.001973 |
| 11Nov2011 | 10103 | 836.93  | 21.61301 | 2 K.KSM+15.( Splice@chr | 1.78E-10 | 0.00292  |
| 11Nov2011 | 16874 | 895.45  | -28.4352 | 2 R.LNFPEFSI chr3@192   | 3.75E-10 | 0.007079 |
| 11Nov2011 | 14159 | 559.32  | 28.75221 | 2 R.IGMDLM Splice@chr   | 9.83E-11 | 0.001749 |
| 11Nov2011 | 12766 | 559.32  | 28.75221 | 2 R.IGMDLM Splice@chr   | 3.44E-10 | 0.003553 |
| 11Nov2011 | 10044 | 403.46  | -6.41018 | 4 R.ENVCVQI chr1@110    | 4.02E-10 | 0.008095 |
| 11Nov2011 | 22643 | 811.96  | -25.4152 | 2 K.NAEIRRK chr1@110    | 4.54E-10 | 0.00849  |

|           |       |         |          |                         |          |          |
|-----------|-------|---------|----------|-------------------------|----------|----------|
| 11Nov2011 | 32643 | 915     | -18.9406 | 2 R.TTK+14.0 Splice@chr | 2.65E-10 | 0.00556  |
| 11Nov2011 | 32900 | 1242.69 | 20.38435 | 2 R.EEIKSEKK chrX@8010  | 5.67E-10 | 0.009429 |
| 11Nov2011 | 29318 | 1384.83 | 6.880617 | 1 K.KSKTEILK chr3@1068  | 4.01E-10 | 0.006711 |
| 11Nov2011 | 19035 | 1185.59 | -9.96133 | 3 _VDQAEM chr1@1214     | 3.48E-10 | 0.005848 |
| 11Nov2011 | 6015  | 876.41  | -8.50606 | 1 K.TEDEARR chrX@1138   | 4.71E-10 | 0.009511 |
| 11Nov2011 | 6408  | 876.4   | -19.8707 | 1 K.TEDEARR chrX@1138   | 4.26E-11 | 0.001291 |
| 11Nov2011 | 6461  | 876.41  | -8.50606 | 1 K.TEDEARR chrX@1138   | 4.26E-11 | 0.001758 |
| 11Nov2011 | 6691  | 876.41  | -8.50606 | 1 K.TEDEARR chrX@1138   | 4.26E-11 | 0.001758 |
| 11Nov2011 | 5847  | 876.41  | -8.50606 | 1 K.TEDEARR chrX@1138   | 2.19E-10 | 0.00439  |
| 11Nov2011 | 5900  | 876.4   | -19.8707 | 1 K.TEDEARR chrX@1138   | 4.26E-11 | 8.68E-04 |
| 11Nov2011 | 5795  | 876.41  | -8.50606 | 1 K.TEDEARR chrX@1138   | 4.26E-11 | 8.32E-04 |
| 11Nov2011 | 6624  | 876.41  | -8.50606 | 1 K.TEDEARR chrX@1138   | 4.26E-11 | 0.001162 |
| 11Nov2011 | 6032  | 876.4   | -19.8707 | 1 K.TEDEARR chrX@1138   | 1.63E-10 | 0.003075 |
| 11Nov2011 | 6451  | 876.4   | -19.8707 | 1 K.TEDEARR chrX@1138   | 4.26E-11 | 8.71E-04 |
| 11Nov2011 | 6463  | 876.41  | -8.50606 | 1 K.TEDEARR chrX@1138   | 4.26E-11 | 6.31E-04 |
| 11Nov2011 | 6523  | 876.41  | -8.50606 | 1 K.TEDEARR chrX@1138   | 3.75E-10 | 0.007248 |
| 11Nov2011 | 5283  | 876.41  | -8.50606 | 1 K.TEDEARR chrX@1138   | 4.41E-11 | 0.001213 |
| 11Nov2011 | 5333  | 876.4   | -19.8707 | 1 K.TEDEARR chrX@1138   | 4.26E-11 | 0.001213 |
| 11Nov2011 | 36713 | 1349.21 | -23.0731 | 2 R.K+14.016 chr2@7770  | 6.23E-10 | 0.009573 |
| 11Nov2011 | 2704  | 631.34  | 2.323929 | 2 R.WLTNFRF chr5@7535   | 4.08E-10 | 0.007955 |
| 11Nov2011 | 9274  | 407.7   | 9.830142 | 2 R.YEMMIK. chr3@1222   | 5.92E-10 | 0.009566 |
| 11Nov2011 | 7619  | 407.7   | 9.830142 | 2 R.YEMMIK. chr3@1222   | 5.92E-10 | 0.007783 |
| 11Nov2011 | 9309  | 407.7   | 9.830142 | 2 R.YEMMIK. chr3@1222   | 5.92E-10 | 0.009236 |
| 11Nov2011 | 11254 | 622.65  | 20.40203 | 3 K.QIEQGEA Splice@chr  | 4.84E-10 | 0.008112 |
| 11Nov2011 | 3538  | 452.27  | 20.92287 | 2 K.KTPNFAP chr2@1125   | 2.83E-10 | 0.004835 |
| 11Nov2011 | 30716 | 472.51  | -27.2481 | 4 K.LAVLGK+ chrX@4560   | 3.55E-10 | 0.007378 |
| 11Nov2011 | 32629 | 985.27  | 8.867662 | 4 R.CKDCVLR chr1@1506   | 3.26E-10 | 0.005277 |
| 11Nov2011 | 14936 | 1241.66 | -24.7633 | 1 K.NQNKRKI chrX@2227   | 6.08E-10 | 0.009971 |
| 11Nov2011 | 32797 | 946.48  | -2.61473 | 2 K.EFYK+14. Splice@chr | 4.72E-10 | 0.00911  |
| 11Nov2011 | 15016 | 424.23  | -22.2808 | 2 R.NKMDVL chr1@5887    | 2.69E-10 | 0.006044 |
| 11Nov2011 | 14513 | 467.93  | -25.8815 | 3 R.FLKISLES' chr5@3919 | 4.80E-10 | 0.009084 |
| 11Nov2011 | 12472 | 467.93  | -25.8815 | 3 R.FLKISLES' chr5@3919 | 8.67E-11 | 0.002514 |
| 11Nov2011 | 30833 | 1152.05 | -21.1039 | 2 R.RHCYFGK chr2@1724   | 3.27E-10 | 0.005542 |
| 11Nov2011 | 2259  | 498.58  | 26.57833 | 3 R.SQYLQM- Splice@chr  | 3.31E-10 | 0.00695  |
| 11Nov2011 | 2260  | 498.58  | 26.57833 | 3 R.SQYLQM- Splice@chr  | 7.58E-11 | 0.002108 |
| 11Nov2011 | 2213  | 498.58  | 26.57833 | 3 R.SQYLQM- Splice@chr  | 1.20E-10 | 0.003138 |
| 11Nov2011 | 9574  | 669.4   | 17.07645 | 2 R.K+14.016 Splice@chr | 7.10E-11 | 0.001175 |
| 11Nov2011 | 17453 | 924.91  | -13.6479 | 2 Q.KPDDISN Splice@chr  | 5.77E-10 | 0.008691 |
| 11Nov2011 | 17454 | 924.4   | -22.6053 | 2 Q.KPDDISN Splice@chr  | 1.53E-10 | 0.002702 |
| 11Nov2011 | 19742 | 920.45  | -19.2932 | 2 _RNPHRDI chr2@9675    | 2.70E-10 | 0.004461 |
| 11Nov2011 | 6080  | 518.95  | -25.6888 | 3 T.EIIVTGSV Splice@chr | 6.12E-10 | 0.009427 |
| 11Nov2011 | 35674 | 1218.16 | -12.7162 | 2 ?.KKWLSNF Splice@chr  | 3.84E-10 | 0.00664  |
| 11Nov2011 | 30064 | 980.55  | 4.33387  | 2 H.VLEAAFV chr5@1975   | 4.16E-10 | 0.008009 |
| 11Nov2011 | 34590 | 921.46  | -23.319  | 2 P.SNIPK+14 chr2@1297  | 3.06E-10 | 0.005134 |
| 11Nov2011 | 16074 | 747.57  | 5.690177 | 5 S.HLPRPGH Splice@chr  | 3.86E-10 | 0.006741 |
| 11Nov2011 | 29902 | 787.88  | 12.22608 | 2 K.FWREIQM chrX@1650   | 1.66E-10 | 0.00297  |
| 11Nov2011 | 21630 | 774.92  | -12.0333 | 2 K.LQIISVIFL chr4@8511 | 1.91E-10 | 0.004601 |

|           |       |         |          |                         |          |          |
|-----------|-------|---------|----------|-------------------------|----------|----------|
| 11Nov2011 | 26597 | 1049.59 | -13.5967 | 2 R.RLLGYLL\ Splice@chr | 2.73E-10 | 0.005139 |
| 11Nov2011 | 30305 | 1151.61 | -3.66151 | 1 R.GGIFTSTL chr3@4224  | 1.85E-10 | 0.003793 |
| 11Nov2011 | 36024 | 1163.95 | -7.55755 | 3 K.ENFEMP\ chrX@1372   | 3.67E-11 | 5.31E-04 |
| 11Nov2011 | 98    | 820.37  | -10.1405 | 1 R.GGTDWC chr3@8758    | 1.50E-10 | 0.003052 |
| 11Nov2011 | 8218  | 752.88  | 24.92213 | 2 R.K+14.016 chr1@3595  | 3.93E-11 | 0.001131 |
| 11Nov2011 | 3348  | 455.9   | -2.50459 | 3 K.NVM+15. chr4@1135   | 5.52E-10 | 0.008839 |
| 11Nov2011 | 5620  | 531.28  | -25.5165 | 2 K.MPMGV\ chr2@6727    | 1.93E-10 | 0.003453 |
| 11Nov2011 | 27314 | 862.48  | 9.862201 | 1 K.DTASNIL chr4@1042   | 1.84E-10 | 0.004059 |
| 11Nov2011 | 13800 | 549.31  | -7.16439 | 3 K.LIWFTGG chr5@1955   | 5.94E-10 | 0.008964 |
| 11Nov2011 | 13873 | 549.31  | -7.16439 | 3 K.LIWFTGG chr5@1955   | 2.61E-10 | 0.00445  |
| 11Nov2011 | 36028 | 1019.19 | -21.42   | 3 K.MFNKKS chr4@1075    | 2.99E-10 | 0.005086 |
| 11Nov2011 | 3866  | 587.3   | 4.892896 | 2 Q.NAVEQE\ Splice@chr  | 1.57E-11 | 9.25E-04 |
| 11Nov2011 | 32652 | 910.47  | 21.92558 | 2 I.MAEASSF chrX@2254   | 2.86E-10 | 0.006136 |
| 11Nov2011 | 15086 | 587.3   | -11.6155 | 2 W.KNNTNL chr5@1300    | 1.70E-10 | 0.003536 |
| 11Nov2011 | 6929  | 716.4   | 8.019867 | 1 K.LAANAEK chr5@1335   | 4.74E-10 | 0.008124 |
| 11Nov2011 | 33417 | 780.9   | -9.0782  | 4 R.KQEKLGF chr1@3430   | 2.49E-10 | 0.003999 |
| 11Nov2011 | 31689 | 781.15  | -10.1536 | 4 R.KQEKLGF chr1@3430   | 8.50E-12 | 6.12E-04 |
| 11Nov2011 | 9871  | 684.41  | 19.97759 | 2 _FLYIYFLI chr1@7157   | 4.27E-10 | 0.009184 |
| 11Nov2011 | 14707 | 764.92  | 10.78637 | 2 K.LLPVNQP Splice@chr  | 1.56E-10 | 0.003488 |
| 11Nov2011 | 3192  | 802.45  | -12.0007 | 2 K.NQK+14.1 chr3@2101  | 4.65E-10 | 0.009389 |
| 11Nov2011 | 6770  | 720.36  | -12.3523 | 2 _NVARSF chr5@3945     | 8.40E-11 | 0.001593 |
| 11Nov2011 | 11821 | 607.31  | 24.23303 | 2 _ESMENK\ chr5@1896    | 9.56E-11 | 0.001864 |
| 11Nov2011 | 28749 | 1104.2  | 18.40556 | 2 K.ILFRAYLG chr5@1865  | 8.98E-11 | 0.00189  |
| 11Nov2011 | 20585 | 656.36  | -18.1296 | 3 R.PEKLIEM\ chr3@1258  | 1.50E-11 | 4.50E-04 |
| 11Nov2011 | 9974  | 522.29  | -1.09281 | 3 K.K+14.016 chr3@4715  | 6.88E-10 | 0.008387 |
| 11Nov2011 | 18399 | 1044.08 | 6.085576 | 2 K.GQK+14.1 chrX@5985  | 5.13E-11 | 8.41E-04 |
| 11Nov2011 | 30017 | 1211.58 | -14.5203 | 2 K.IRQWRR\ Splice@chr  | 5.88E-10 | 0.009517 |
| 11Nov2011 | 29711 | 1211.58 | -14.5203 | 2 K.IRQWRR\ Splice@chr  | 5.48E-10 | 0.009287 |
| 11Nov2011 | 29794 | 1015.5  | -19.4324 | 2 R.FMNSSK+ chr2@8237   | 1.03E-10 | 0.002131 |
| 11Nov2011 | 30185 | 1015.5  | -19.4324 | 2 R.FMNSSK+ chr2@8237   | 5.41E-10 | 0.00868  |
| 11Nov2011 | 30232 | 1015.5  | -19.4324 | 2 R.FMNSSK+ chr2@8237   | 5.74E-10 | 0.00943  |
| 11Nov2011 | 26184 | 1345.23 | -22.233  | 2 E.LELVVYQ Splice@chr  | 3.46E-10 | 0.007015 |
| 11Nov2011 | 20166 | 1065.07 | 3.671087 | 2 R.YPELSEIQ chr2@9825  | 4.72E-10 | 0.008069 |
| 11Nov2011 | 17849 | 842.51  | -17.1896 | 2 K.KNLELFL chr1@1457   | 1.16E-10 | 0.002404 |
| 11Nov2011 | 10399 | 589.36  | 14.93866 | 2 _KFELSAK chr3@1226    | 3.54E-10 | 0.007378 |
| 11Nov2011 | 13674 | 473.28  | 19.53823 | 2 K.IELEALEK chr3@1485  | 3.51E-10 | 0.00609  |
| 11Nov2011 | 33189 | 506.57  | 1.126789 | 3 _DWHHTF Splice@chr    | 1.20E-11 | 1.41E-04 |
| 11Nov2011 | 33179 | 506.57  | 1.126789 | 3 _DWHHTF Splice@chr    | 4.58E-11 | 8.47E-04 |
| 11Nov2011 | 34021 | 506.57  | 1.126789 | 3 _DWHHTF Splice@chr    | 3.94E-10 | 0.00774  |
| 11Nov2011 | 5616  | 831.43  | -12.728  | 1 K.NEGKTGF chr1@8724   | 5.90E-10 | 0.008909 |
| 11Nov2011 | 5994  | 831.43  | -12.728  | 1 K.NEGKTGF chr1@8724   | 5.06E-10 | 0.008457 |
| 11Nov2011 | 7780  | 1141.1  | -18.7175 | 2 V.KLIGTDPI Splice@chr | 5.62E-10 | 0.009893 |
| 11Nov2011 | 33809 | 1389.83 | 7.610005 | 1 R.QCK+14.1 chr3@8418  | 4.96E-10 | 0.008217 |
| 11Nov2011 | 32687 | 822.43  | 27.34471 | 2 Q.M+15.99 Splice@chr  | 4.66E-10 | 0.007867 |
| 11Nov2011 | 27703 | 1188.07 | -5.94023 | 2 R.TWGYPN Splice@chr   | 1.78E-10 | 0.004017 |
| 11Nov2011 | 63    | 792.38  | -6.55564 | 1 K.DESKSAR chr5@1222   | 4.75E-10 | 0.009452 |
| 11Nov2011 | 20344 | 1356.82 | 14.40578 | 1 W.FLLLRQV Splice@chr  | 3.88E-10 | 0.004477 |

|           |       |         |          |                         |          |          |
|-----------|-------|---------|----------|-------------------------|----------|----------|
| 11Nov2011 | 24328 | 1356.81 | 7.112854 | 1 W.FLLLRQV Splice@chr  | 5.71E-10 | 0.008831 |
| 11Nov2011 | 4897  | 1046.57 | 23.35072 | 1 R.NSSRRPS Splice@chr  | 5.96E-10 | 0.009284 |
| 11Nov2011 | 10067 | 829.38  | -15.1938 | 1 K.NDASFFK Splice@chr  | 5.87E-10 | 0.007783 |
| 11Nov2011 | 33041 | 999.57  | -29.0326 | 1 K.TVPKIYHI Splice@chr | 5.64E-11 | 0.002161 |
| 11Nov2011 | 34320 | 1305.17 | -24.2271 | 2 R.NGFSGSII chr4@2701  | 1.31E-10 | 0.002677 |
| 11Nov2011 | 16112 | 651.37  | -23.1492 | 2 K.NNVK+14 chr3@1298   | 2.09E-10 | 0.004165 |
| 11Nov2011 | 20121 | 599.28  | -28.7398 | 2 K.LCSTADT chrX@1481   | 3.19E-10 | 0.006151 |
| 11Nov2011 | 20038 | 599.28  | -28.7398 | 2 K.LCSTADT chrX@1481   | 1.45E-10 | 0.003228 |
| 11Nov2011 | 23580 | 1062.07 | -15.1632 | 2 S.FAK+14.0 chr5@2472  | 5.90E-10 | 0.008909 |
| 11Nov2011 | 3058  | 485.29  | -1.00826 | 2 R.IKDVEIPR chr2@9251  | 1.27E-10 | 0.002677 |
| 11Nov2011 | 3137  | 485.29  | -1.00826 | 2 R.IKDVEIPR chr2@9251  | 9.21E-11 | 0.002185 |
| 11Nov2011 | 31871 | 582.66  | 12.00574 | 3 K.WFLIHGR chr2@1155   | 4.18E-10 | 0.006404 |
| 11Nov2011 | 7981  | 957.53  | -7.21042 | 1 R.DGIVGIVI Splice@chr | 3.06E-10 | 0.004554 |
| 11Nov2011 | 4445  | 403.72  | -6.21393 | 2 _VSASSSIR chr5@1478   | 5.59E-10 | 0.009119 |
| 11Nov2011 | 19848 | 1043.58 | 6.121741 | 2 K.TNRSDKL chr2@9661   | 1.96E-11 | 0.001036 |
| 11Nov2011 | 16174 | 749.39  | -17.0141 | 2 _RLLQHAN Splice@chr   | 1.43E-11 | 9.25E-04 |
| 11Nov2011 | 15150 | 749.39  | -17.0141 | 2 _RLLQHAN Splice@chr   | 3.11E-11 | 6.13E-04 |
| 11Nov2011 | 14941 | 749.39  | -17.0141 | 2 _RLLQHAN Splice@chr   | 1.79E-11 | 8.09E-05 |
| 11Nov2011 | 15554 | 749.39  | -17.0141 | 2 _RLLQHAN Splice@chr   | 3.03E-11 | 3.99E-04 |
| 11Nov2011 | 16213 | 749.39  | -17.0141 | 2 _RLLQHAN Splice@chr   | 1.54E-11 | 2.00E-04 |
| 11Nov2011 | 9795  | 560.81  | 10.68504 | 2 R.PDFSLNS chr3@3320   | 3.76E-10 | 0.004309 |
| 11Nov2011 | 10773 | 560.81  | 10.68504 | 2 R.PDFSLNS chr3@3320   | 3.68E-10 | 0.007502 |
| 11Nov2011 | 32231 | 684.37  | -3.08208 | 2 R.KIRDNLS Splice@chr  | 5.04E-10 | 0.009394 |
| 11Nov2011 | 1065  | 552.3   | -2.43568 | 2 K.EAEEEEKKI chrX@5587 | 4.49E-10 | 0.007866 |
| 11Nov2011 | 6808  | 793.42  | 19.33353 | 2 R.NEKYSTV Splice@chr  | 9.83E-11 | 0.001749 |
| 11Nov2011 | 6747  | 793.42  | 19.33353 | 2 R.NEKYSTV Splice@chr  | 2.02E-10 | 0.003844 |
| 11Nov2011 | 6143  | 793.42  | 19.33353 | 2 R.NEKYSTV Splice@chr  | 5.41E-10 | 0.006905 |
| 11Nov2011 | 6194  | 793.42  | 19.33353 | 2 R.NEKYSTV Splice@chr  | 7.45E-10 | 0.008932 |
| 11Nov2011 | 16512 | 834.97  | 27.42706 | 2 K.KKTKSYN chr4@1328   | 4.32E-10 | 0.006684 |
| 11Nov2011 | 25189 | 927.5   | 23.51889 | 2 R.LLYYHHSI Splice@chr | 5.87E-10 | 0.008799 |
| 11Nov2011 | 27672 | 841.45  | -2.72369 | 2 _TRVASVG chr3@3745    | 1.19E-10 | 0.002821 |
| 11Nov2011 | 3312  | 802.45  | -0.37858 | 1 R.IEAGGGC chr5@8776   | 7.62E-11 | 0.001704 |
| 11Nov2011 | 3295  | 801.45  | 3.812604 | 1 R.IEAGGGC chr5@8776   | 2.55E-10 | 0.004157 |
| 11Nov2011 | 3342  | 801.45  | 3.812604 | 1 R.IEAGGGC chr5@8776   | 5.93E-11 | 0.002161 |
| 11Nov2011 | 3320  | 802.45  | -0.37858 | 1 R.IEAGGGC chr5@8776   | 1.89E-12 | 2.19E-04 |
| 11Nov2011 | 3291  | 801.45  | 3.812604 | 1 R.IEAGGGC chr5@8776   | 2.91E-12 | 2.83E-04 |
| 11Nov2011 | 3312  | 802.45  | -0.37858 | 1 R.IEAGGGC chr5@8776   | 3.70E-10 | 0.006099 |
| 11Nov2011 | 6964  | 560.78  | -6.8692  | 2 K.ISNNSEN chrX@1688   | 5.44E-10 | 0.009239 |
| 11Nov2011 | 27831 | 1127.67 | 5.881423 | 2 _K+14.016 chr5@1938   | 1.60E-10 | 0.002678 |
| 11Nov2011 | 6628  | 830.88  | 27.43403 | 2 W.NCFTSAI Splice@chr  | 5.63E-10 | 0.009051 |
| 11Nov2011 | 1041  | 446.26  | 15.92188 | 2 R.KGGVSSC chr1@9115   | 4.32E-10 | 0.009042 |
| 11Nov2011 | 28950 | 1377    | 26.85161 | 3 P.PM+15.9 Splice@chr  | 1.33E-10 | 0.003389 |
| 11Nov2011 | 28977 | 1376.99 | 19.51769 | 3 P.PM+15.9 Splice@chr  | 7.84E-11 | 0.001919 |
| 11Nov2011 | 32329 | 1376.99 | 19.51769 | 3 P.PM+15.9 Splice@chr  | 2.17E-10 | 0.003639 |
| 11Nov2011 | 24949 | 1377.3  | 1.907931 | 3 P.PM+15.9 Splice@chr  | 2.66E-13 | 0        |
| 11Nov2011 | 33292 | 940.02  | -20.7118 | 2 _FIFK+14.0 chr5@9942  | 4.30E-10 | 0.007226 |
| 11Nov2011 | 34788 | 914.5   | 14.27426 | 2 K.TKLIYYPC chr2@3390  | 3.27E-10 | 0.005945 |

|           |       |         |          |                          |          |          |
|-----------|-------|---------|----------|--------------------------|----------|----------|
| 11Nov2011 | 18270 | 946.97  | -28.1768 | 2 C.NWK+14. chr2@3520    | 2.71E-10 | 0.006044 |
| 11Nov2011 | 25203 | 1094.04 | 9.079267 | 2 R.SCSFFFNI chrX@8486   | 4.90E-10 | 0.009767 |
| 11Nov2011 | 25906 | 1140.07 | -19.3777 | 2 K.IKPMFSD chr1@5622    | 3.91E-10 | 0.004552 |
| 11Nov2011 | 12588 | 506.3   | 3.184385 | 3 K.TLIGNRK- chr2@1468   | 9.89E-11 | 0.002397 |
| 11Nov2011 | 21637 | 760.72  | 18.35362 | 3 R.RAINGTE Splice@chr   | 9.70E-11 | 0.001843 |
| 11Nov2011 | 22851 | 760.72  | 18.35362 | 3 R.RAINGTE Splice@chr   | 3.16E-10 | 0.005378 |
| 11Nov2011 | 27589 | 1016.56 | 13.9435  | 3 M.YVKNNIL chr5@1960    | 5.31E-10 | 0.008677 |
| 11Nov2011 | 4797  | 735.86  | -3.36466 | 2 _KNNFNSM chr5@1616     | 3.83E-10 | 0.006294 |
| 11Nov2011 | 21452 | 515.29  | -6.17134 | 3 K.PNFTVILS chr4@1642   | 4.34E-10 | 0.008762 |
| 11Nov2011 | 19866 | 515.29  | -6.17134 | 3 K.PNFTVILS chr4@1642   | 2.90E-10 | 0.005472 |
| 11Nov2011 | 19816 | 515.29  | -6.17134 | 3 K.PNFTVILS chr4@1642   | 4.81E-10 | 0.00984  |
| 11Nov2011 | 20721 | 515.29  | -6.17134 | 3 K.PNFTVILS chr4@1642   | 4.84E-10 | 0.007616 |
| 11Nov2011 | 21532 | 515.29  | -6.17134 | 3 K.PNFTVILS chr4@1642   | 5.68E-10 | 0.009893 |
| 11Nov2011 | 24809 | 1169.62 | 22.07753 | 2 _QAFWK R Splice@chr    | 3.53E-10 | 0.006137 |
| 11Nov2011 | 10704 | 821.44  | 15.92055 | 1 K.TGFGING chrX@2647    | 3.01E-10 | 0.00573  |
| 11Nov2011 | 11697 | 821.44  | 15.92055 | 1 K.TGFGING chrX@2647    | 2.39E-11 | 4.20E-04 |
| 11Nov2011 | 11197 | 821.44  | 15.92055 | 1 K.TGFGING chrX@2647    | 2.14E-11 | 3.90E-04 |
| 11Nov2011 | 21652 | 990.49  | -21.8765 | 2 F.RLSESELE chr4@7519   | 2.61E-10 | 0.004309 |
| 11Nov2011 | 21595 | 990.49  | -21.8765 | 2 F.RLSESELE chr4@7519   | 1.92E-10 | 0.003174 |
| 11Nov2011 | 21231 | 990.49  | -21.8765 | 2 F.RLSESELE chr4@7519   | 4.51E-10 | 0.008903 |
| 11Nov2011 | 19900 | 990.49  | -21.8765 | 2 F.RLSESELE chr4@7519   | 4.91E-10 | 0.009767 |
| 11Nov2011 | 20422 | 990.49  | -21.8765 | 2 F.RLSESELE chr4@7519   | 1.97E-10 | 0.003086 |
| 11Nov2011 | 21571 | 990.49  | -21.8765 | 2 F.RLSESELE chr4@7519   | 2.04E-10 | 0.003937 |
| 11Nov2011 | 21175 | 990.49  | -21.8765 | 2 F.RLSESELE chr4@7519   | 2.37E-10 | 0.005073 |
| 11Nov2011 | 18181 | 990.49  | -21.8765 | 2 F.RLSESELE chr4@7519   | 2.43E-10 | 0.005984 |
| 11Nov2011 | 20268 | 824.46  | -15.3181 | 3 _TFSVPDLI chr5@1348    | 4.95E-10 | 0.009954 |
| 11Nov2011 | 20441 | 824.46  | -15.3181 | 3 _TFSVPDLI chr5@1348    | 2.47E-10 | 0.005523 |
| 11Nov2011 | 35171 | 1217.6  | 4.567239 | 3 K.NKMFLK+ chr5@8043    | 2.97E-10 | 0.005551 |
| 11Nov2011 | 29764 | 736.39  | 5.228893 | 2 I.EAENGTE Splice@chr   | 2.07E-11 | 3.29E-04 |
| 11Nov2011 | 5013  | 731.41  | 6.685146 | 1 _EVGISAR. chrX@1675    | 4.14E-10 | 0.008067 |
| 11Nov2011 | 20387 | 1126.63 | -13.7287 | 1 R.FKLSNFL1 chr2@3916   | 4.75E-10 | 0.009452 |
| 11Nov2011 | 5221  | 440.24  | 15.71618 | 3 _VSHEVV C chr1@1271    | 2.38E-10 | 0.004225 |
| 11Nov2011 | 13323 | 521.94  | -20.3863 | 3 R.IFLYNIFFI Splice@chr | 2.85E-10 | 0.006136 |
| 11Nov2011 | 596   | 815.41  | 15.58875 | 1 K.SSYTVMK chr5@9780    | 3.33E-10 | 0.007131 |
| 11Nov2011 | 4739  | 831.44  | -19.0561 | 1 K.WGGGG C chr3@1095    | 7.12E-10 | 0.008541 |
| 11Nov2011 | 22    | 597.96  | 13.08748 | 3 K.FECTTGG chr1@8205    | 2.48E-10 | 0.005543 |
| 11Nov2011 | 20036 | 915.55  | 1.503616 | 2 K.TTK+14.0 chrX@2746   | 3.62E-10 | 0.005999 |
| 11Nov2011 | 23227 | 749.4   | -16.2292 | 2 K.DIYSISKD Splice@chr  | 1.29E-10 | 0.003389 |
| 11Nov2011 | 18854 | 1174.09 | -25.7902 | 2 R.KGFWQV Splice@chr    | 4.26E-10 | 0.006901 |
| 11Nov2011 | 27448 | 918.52  | -13.903  | 2 K.FK+14.01 chr5@4290   | 1.50E-10 | 0.002429 |
| 11Nov2011 | 7028  | 1075.59 | -26.5812 | 1 R.M+15.99 chr5@1902    | 5.19E-10 | 0.009634 |
| 11Nov2011 | 9407  | 846.49  | 27.61256 | 1 R.FPGIQGA chr3@1682    | 3.04E-10 | 0.004978 |
| 11Nov2011 | 9302  | 846.49  | 27.61256 | 1 R.FPGIQGA chr3@1682    | 2.19E-10 | 0.005105 |
| 11Nov2011 | 5061  | 707.37  | -3.97474 | 1 K.GGFLGEK chr4@1416    | 4.40E-10 | 0.007026 |
| 11Nov2011 | 2832  | 778.37  | -18.9721 | 2 K.IEKEM+1. Splice@chr  | 3.40E-10 | 0.006988 |
| 11Nov2011 | 2525  | 778.37  | -18.9721 | 2 K.IEKEM+1. Splice@chr  | 2.02E-10 | 0.003844 |
| 11Nov2011 | 2192  | 778.38  | -6.0874  | 2 K.IEKEM+1. Splice@chr  | 5.11E-10 | 0.006341 |

|           |       |         |          |                         |          |          |
|-----------|-------|---------|----------|-------------------------|----------|----------|
| 11Nov2011 | 2246  | 778.38  | -6.0874  | 2 K.IEKEM+1 Splice@chr  | 6.52E-10 | 0.008238 |
| 11Nov2011 | 2506  | 778.38  | -6.0874  | 2 K.IEKEM+1 Splice@chr  | 2.24E-10 | 0.004289 |
| 11Nov2011 | 2884  | 778.37  | -18.9721 | 2 K.IEKEM+1 Splice@chr  | 4.33E-10 | 0.007055 |
| 11Nov2011 | 2495  | 778.37  | -18.9721 | 2 K.IEKEM+1 Splice@chr  | 3.43E-10 | 0.008377 |
| 11Nov2011 | 10025 | 1104.54 | -29.2022 | 1 _..M+15.99 chr2@1283  | 1.43E-10 | 0.002378 |
| 11Nov2011 | 6106  | 543.81  | -7.08396 | 2 R.FAGPLEV chr3@1226   | 2.73E-10 | 0.005463 |
| 11Nov2011 | 35364 | 1026.49 | -2.11289 | 2 E.FDFLIQLC Splice@chr | 5.89E-10 | 0.009084 |
| 11Nov2011 | 32734 | 1026.5  | 7.6529   | 2 E.FDFLIQLC Splice@chr | 5.41E-10 | 0.009525 |
| 11Nov2011 | 3139  | 409.74  | -10.6768 | 2 K.MVITNLK Splice@chr  | 3.68E-10 | 0.007222 |
| 11Nov2011 | 3006  | 410.24  | -14.7807 | 2 K.MVITNLK Splice@chr  | 2.94E-10 | 0.004989 |
| 11Nov2011 | 9514  | 817.46  | 15.9234  | 2 R.RK+14.01 Splice@chr | 7.94E-11 | 0.001919 |
| 11Nov2011 | 20356 | 728.89  | -15.3449 | 2 R.REVM+1 chr4@4572    | 1.80E-10 | 0.003071 |
| 11Nov2011 | 1768  | 801.45  | 25.12164 | 1 R.NLSGNAF Splice@chr  | 1.47E-10 | 0.003342 |
| 11Nov2011 | 17860 | 955.5   | -28.6466 | 2 K.IGKNMDI chr5@1909   | 6.03E-10 | 0.009075 |
| 11Nov2011 | 30549 | 1032.56 | 18.85566 | 2 R.QPEPSK+ chrX@2429   | 2.66E-10 | 0.004739 |
| 11Nov2011 | 27871 | 1071.11 | -28.8438 | 2 K.LTSNLK+ Splice@chr  | 3.37E-10 | 0.007053 |
| 11Nov2011 | 2243  | 858.5   | 1.1427   | 1 _..TVASRAP chrX@7067  | 3.58E-10 | 0.006913 |
| 11Nov2011 | 27484 | 779.73  | -23.4961 | 3 R.K+14.016 chr5@1447  | 3.07E-10 | 0.005836 |
| 11Nov2011 | 24670 | 910.99  | -12.6489 | 2 Y.FKNIDKD Splice@chr  | 7.92E-11 | 0.001704 |
| 11Nov2011 | 24749 | 910.99  | -12.6489 | 2 Y.FKNIDKD Splice@chr  | 3.42E-10 | 0.005642 |
| 11Nov2011 | 842   | 502.32  | 11.58019 | 2 K.ETKKRKG chr5@1026   | 4.20E-10 | 0.008812 |
| 11Nov2011 | 1234  | 502.32  | 11.58019 | 2 K.ETKKRKG chr5@1026   | 5.56E-10 | 0.009333 |
| 11Nov2011 | 1248  | 502.32  | 11.58019 | 2 K.ETKKRKG chr5@1026   | 3.67E-10 | 0.006408 |
| 11Nov2011 | 1239  | 502.32  | 11.58019 | 2 K.ETKKRKG chr5@1026   | 2.47E-10 | 0.006133 |
| 11Nov2011 | 35464 | 1087.61 | -15.9522 | 3 L.LSKTLIFFF chr3@8793 | 1.54E-10 | 0.003108 |
| 11Nov2011 | 34812 | 1321.36 | 5.732109 | 3 R.DLNPRV chr4@4885    | 3.18E-11 | 4.75E-04 |
| 11Nov2011 | 34958 | 942.02  | 14.50556 | 2 R.KIVFYEG chr5@2604   | 2.31E-10 | 0.004488 |
| 11Nov2011 | 20058 | 777.91  | 29.12834 | 2 C.TCLERYL chrX@1533   | 4.58E-10 | 0.009277 |
| 11Nov2011 | 21415 | 777.91  | 29.12834 | 2 C.TCLERYL chrX@1533   | 5.79E-10 | 0.009737 |
| 11Nov2011 | 21315 | 777.91  | 29.12834 | 2 C.TCLERYL chrX@1533   | 3.96E-10 | 0.00774  |
| 11Nov2011 | 11762 | 699.38  | 12.23563 | 2 N.STPAVILY chrX@8617  | 4.76E-10 | 0.00903  |
| 11Nov2011 | 1659  | 545.31  | -14.6894 | 2 K.RLQPTRY chr5@2373   | 4.93E-10 | 0.007671 |
| 11Nov2011 | 9812  | 904.5   | -9.46571 | 1 K.NIFPGSLF chr5@1806  | 3.17E-10 | 0.005921 |
| 11Nov2011 | 28528 | 903.94  | -19.6462 | 2 K.K+14.016 chr2@5573  | 5.52E-10 | 0.009023 |
| 11Nov2011 | 14451 | 877.47  | 28.13458 | 1 K.KMENLDI chr5@1129   | 5.13E-10 | 0.008605 |
| 11Nov2011 | 46    | 791.36  | -16.2349 | 1 K.TANEEAR chrX@1662   | 2.53E-10 | 0.004401 |
| 11Nov2011 | 30406 | 692.88  | -15.9671 | 2 A.SRLFIFVN Splice@chr | 3.40E-10 | 0.006298 |
| 11Nov2011 | 18261 | 926.16  | -23.1196 | 3 _..GKKMSKI chr3@2039  | 6.88E-10 | 0.008387 |
| 11Nov2011 | 737   | 817.46  | -1.56919 | 1 K.KTDTPIVR chr5@1815  | 5.06E-10 | 0.008431 |
| 11Nov2011 | 32939 | 1142.07 | -24.8019 | 2 K.WTM+15 chr5@1074    | 2.49E-10 | 0.004289 |
| 11Nov2011 | 6538  | 446.75  | 3.354779 | 2 R.IFSAGELF chr3@5608  | 2.00E-10 | 0.003768 |
| 11Nov2011 | 5983  | 446.75  | 3.354779 | 2 R.IFSAGELF chr3@5608  | 1.87E-10 | 0.002238 |
| 11Nov2011 | 7296  | 446.75  | 3.354779 | 2 R.IFSAGELF chr3@5608  | 5.58E-10 | 0.009384 |
| 11Nov2011 | 23992 | 1233.14 | -23.9591 | 2 V.K+14.016 chr1@9504  | 4.58E-10 | 0.009127 |
| 11Nov2011 | 36717 | 962.55  | -12.1343 | 1 R.RPSSLVFI chr1@1281  | 4.56E-10 | 0.007822 |
| 11Nov2011 | 1371  | 710.36  | -9.42683 | 2 R.NFFDK+1 chr4@1073   | 2.72E-10 | 0.005844 |
| 11Nov2011 | 1366  | 710.36  | -9.42683 | 2 R.NFFDK+1 chr4@1073   | 6.01E-11 | 0.001486 |

|           |       |         |          |                          |          |          |
|-----------|-------|---------|----------|--------------------------|----------|----------|
| 11Nov2011 | 1309  | 710.36  | -9.42683 | 2 R.NFFDK+1 chr4@1075    | 2.43E-10 | 0.004235 |
| 11Nov2011 | 1351  | 710.36  | -9.42683 | 2 R.NFFDK+1 chr4@1075    | 4.01E-10 | 0.006897 |
| 11Nov2011 | 1274  | 710.36  | -9.42683 | 2 R.NFFDK+1 chr4@1075    | 1.36E-10 | 0.002746 |
| 11Nov2011 | 17951 | 996.48  | 0.306564 | 1 _YDACRRR chr4@1215     | 1.02E-10 | 0.001625 |
| 11Nov2011 | 11661 | 480.27  | -18.5931 | 2 K.IMVVGVI chr4@8732    | 2.09E-10 | 0.004866 |
| 11Nov2011 | 27749 | 1090.52 | 1.486218 | 2 S.SSSANWF Splice@chr   | 4.04E-10 | 0.008012 |
| 11Nov2011 | 3638  | 789.44  | -23.0686 | 1 K.ITKGGGT chr1@1215    | 8.01E-11 | 0.001533 |
| 11Nov2011 | 3635  | 789.44  | -23.0686 | 1 K.ITKGGGT chr1@1215    | 1.08E-10 | 0.002299 |
| 11Nov2011 | 18922 | 766.36  | -1.8739  | 2 K.SDGVDV5 chr3@5860    | 7.44E-12 | 1.88E-04 |
| 11Nov2011 | 20856 | 1039.54 | -8.43655 | 2 K.YSPNLRA chr4@4065    | 2.09E-10 | 0.004707 |
| 11Nov2011 | 19310 | 1039.54 | -8.43655 | 2 K.YSPNLRA chr4@4065    | 3.78E-10 | 0.007306 |
| 11Nov2011 | 20897 | 1039.54 | -8.43655 | 2 K.YSPNLRA chr4@4065    | 3.25E-10 | 0.006141 |
| 11Nov2011 | 13591 | 1314.58 | 25.43808 | 1 _ECQEGYE chr5@1232     | 2.73E-10 | 0.004461 |
| 11Nov2011 | 27940 | 857.69  | -18.6661 | 4 R.VIIK+14.C Splice@chr | 3.11E-10 | 0.005886 |
| 11Nov2011 | 14848 | 636.32  | -26.4861 | 2 R.FSWFAQI chr5@1137    | 5.23E-10 | 0.008574 |
| 11Nov2011 | 17487 | 536.26  | -27.5615 | 2 K.SRGGYDL chr2@1245    | 4.97E-10 | 0.008332 |
| 11Nov2011 | 18073 | 748.42  | 7.594622 | 2 _ICQVLEK Splice@chr    | 2.54E-10 | 0.004817 |
| 11Nov2011 | 4547  | 814.5   | 16.37934 | 1 K.NSAILAP1 chrX@1285   | 1.94E-10 | 0.004829 |
| 11Nov2011 | 28719 | 1105.54 | 20.81581 | 2 I.IEGHMGK Splice@chr   | 2.35E-10 | 0.003723 |
| 11Nov2011 | 33703 | 807.46  | 29.26516 | 3 R.YGFVHEK chr4@1595    | 5.06E-10 | 0.007941 |
| 11Nov2011 | 25145 | 1063.53 | -29.6243 | 2 S.CKCSKNC chr4@7024    | 4.87E-10 | 0.0099   |
| 11Nov2011 | 23368 | 712.39  | -29.2849 | 3 K.NPMKICK chr2@2287    | 3.60E-10 | 0.005999 |
| 11Nov2011 | 191   | 793.38  | -15.885  | 1 K.DDTWKK chrX@1051     | 5.53E-10 | 0.009333 |
| 11Nov2011 | 14177 | 477.98  | 25.39943 | 3 R.AENIPLLT chr5@1837   | 6.72E-11 | 0.002398 |
| 11Nov2011 | 7480  | 1073.05 | 12.41167 | 2 L.KIDDFEII chr4@1685   | 2.61E-10 | 0.004943 |
| 11Nov2011 | 28868 | 644.34  | 10.42113 | 5 K.MGTK+1+ chrX@5561    | 6.31E-10 | 0.009777 |
| 11Nov2011 | 33155 | 1122.57 | -23.2911 | 1 R.GARWYV chr5@1321     | 1.97E-10 | 0.003681 |
| 11Nov2011 | 9847  | 748.39  | 7.921592 | 1 K.EATVSNK chr3@7894    | 2.62E-10 | 0.00546  |
| 11Nov2011 | 1195  | 632.78  | -25.4076 | 2 _KM+15.9 Splice@chr    | 1.28E-10 | 0.002209 |
| 11Nov2011 | 1404  | 632.78  | -25.4076 | 2 _KM+15.9 Splice@chr    | 2.15E-10 | 0.00493  |
| 11Nov2011 | 1448  | 632.78  | -25.4076 | 2 _KM+15.9 Splice@chr    | 1.14E-10 | 0.003018 |
| 11Nov2011 | 1442  | 632.78  | -25.4076 | 2 _KM+15.9 Splice@chr    | 1.42E-10 | 0.002885 |
| 11Nov2011 | 1585  | 632.78  | -25.4076 | 2 _KM+15.9 Splice@chr    | 3.60E-10 | 0.006551 |
| 11Nov2011 | 1255  | 632.78  | -25.4076 | 2 _KM+15.9 Splice@chr    | 1.02E-10 | 0.002131 |
| 11Nov2011 | 1209  | 632.78  | -25.4076 | 2 _KM+15.9 Splice@chr    | 1.64E-10 | 0.003536 |
| 11Nov2011 | 1380  | 632.78  | -25.4076 | 2 _KM+15.9 Splice@chr    | 1.16E-10 | 0.002285 |
| 11Nov2011 | 85    | 775.42  | 3.940756 | 2 K.EEKKNM- Splice@chr   | 5.85E-10 | 0.009587 |
| 11Nov2011 | 29344 | 735.37  | -14.877  | 2 _EHK+14.C chr5@9755    | 5.23E-10 | 0.009474 |
| 11Nov2011 | 6883  | 490.23  | -29.3176 | 2 R.K+14.016 chr5@1871   | 4.89E-10 | 0.008181 |
| 11Nov2011 | 25011 | 1354.19 | 24.75062 | 2 K.LLSFCSSIV chrX@1582  | 4.56E-10 | 0.008545 |
| 11Nov2011 | 26466 | 968.13  | -27.2505 | 3 _AVPFVPI5 Splice@chr   | 3.07E-10 | 0.006512 |
| 11Nov2011 | 6581  | 626.3   | -9.76097 | 2 R.LCESGAA Splice@chr   | 2.10E-15 | 0        |
| 11Nov2011 | 18104 | 1090.64 | 2.300686 | 1 L.SLIILAM+ Splice@chr  | 5.31E-10 | 0.008727 |
| 11Nov2011 | 18165 | 1090.64 | 2.300686 | 1 L.SLIILAM+ Splice@chr  | 5.70E-10 | 0.009267 |
| 11Nov2011 | 17876 | 1090.64 | 2.300686 | 1 L.SLIILAM+ Splice@chr  | 4.02E-10 | 0.007545 |
| 11Nov2011 | 17139 | 1090.65 | 11.49554 | 1 L.SLIILAM+ Splice@chr  | 6.23E-10 | 0.009285 |
| 11Nov2011 | 17200 | 1090.65 | 11.49554 | 1 L.SLIILAM+ Splice@chr  | 3.46E-10 | 0.005175 |

|           |       |         |          |                          |          |          |
|-----------|-------|---------|----------|--------------------------|----------|----------|
| 11Nov2011 | 17320 | 1090.64 | 2.300686 | 1 L.SLIILAM+ Splice@chr  | 5.31E-10 | 0.008635 |
| 11Nov2011 | 17260 | 1090.64 | 2.300686 | 1 L.SLIILAM+ Splice@chr  | 3.58E-10 | 0.006246 |
| 11Nov2011 | 18250 | 1090.64 | 2.300686 | 1 L.SLIILAM+ Splice@chr  | 4.24E-10 | 0.00685  |
| 11Nov2011 | 18189 | 1090.64 | 2.300686 | 1 L.SLIILAM+ Splice@chr  | 4.91E-10 | 0.007904 |
| 11Nov2011 | 17840 | 1090.64 | 2.300686 | 1 L.SLIILAM+ Splice@chr  | 4.13E-10 | 0.007955 |
| 11Nov2011 | 4651  | 833.46  | -4.25508 | 1 R.DMVQLV chrX@9811     | 3.65E-10 | 0.007437 |
| 11Nov2011 | 4775  | 833.46  | -4.25508 | 1 R.DMVQLV chrX@9811     | 3.10E-10 | 0.005794 |
| 11Nov2011 | 5267  | 833.46  | -4.25508 | 1 R.DMVQLV chrX@9811     | 2.88E-10 | 0.005475 |
| 11Nov2011 | 5238  | 833.46  | -4.25508 | 1 R.DMVQLV chrX@9811     | 3.09E-10 | 0.005749 |
| 11Nov2011 | 5000  | 833.46  | -4.25508 | 1 R.DMVQLV chrX@9811     | 3.09E-10 | 0.005098 |
| 11Nov2011 | 4388  | 833.46  | -4.25508 | 1 R.DMVQLV chrX@9811     | 3.09E-10 | 0.007165 |
| 11Nov2011 | 4303  | 832.46  | -0.22022 | 1 R.DMVQLV chrX@9811     | 3.05E-10 | 0.007165 |
| 11Nov2011 | 13349 | 765.38  | -12.3766 | 1 R.SPEHAPK chr5@4294    | 1.98E-10 | 0.003438 |
| 11Nov2011 | 13141 | 765.38  | -12.3766 | 1 R.SPEHAPK chr5@4294    | 3.17E-10 | 0.006042 |
| 11Nov2011 | 29578 | 1139.62 | -23.264  | 1 _._QK+14.01 Splice@chr | 4.87E-10 | 0.0099   |
| 11Nov2011 | 22874 | 1017.55 | 25.06496 | 1 ?.VCAHFAR Splice@chr   | 5.77E-10 | 0.009479 |
| 11Nov2011 | 10633 | 904.5   | -11.4166 | 1 R.DITLSSLR chr3@2830   | 5.71E-10 | 0.009586 |
| 11Nov2011 | 10040 | 904.5   | -11.4166 | 1 R.DITLSSLR chr3@2830   | 5.71E-10 | 0.008582 |
| 11Nov2011 | 10114 | 905.5   | -15.1297 | 1 R.DITLSSLR chr3@2830   | 5.71E-10 | 0.008582 |
| 11Nov2011 | 10651 | 904.5   | -11.4166 | 1 R.DITLSSLR chr3@2830   | 5.72E-10 | 0.009517 |
| 11Nov2011 | 10199 | 904.5   | -11.4166 | 1 R.DITLSSLR chr3@2830   | 5.71E-10 | 0.009321 |
| 11Nov2011 | 6051  | 640.81  | -8.49025 | 2 K.MEM+15 Splice@chr    | 4.94E-10 | 0.008217 |
| 11Nov2011 | 4613  | 496.29  | -16.0958 | 2 _._LHLHTLTI Splice@chr | 5.20E-10 | 0.007873 |
| 11Nov2011 | 7645  | 460.76  | 6.173222 | 2 _._QNPGVH Splice@chr   | 3.17E-10 | 0.006098 |
| 11Nov2011 | 4956  | 972.55  | -6.16077 | 1 R.NDSIPKV. chrX@5098   | 6.01E-10 | 0.009427 |
| 11Nov2011 | 5005  | 972.55  | -6.16077 | 1 R.NDSIPKV. chrX@5098   | 3.63E-10 | 0.006971 |
| 11Nov2011 | 6746  | 514.31  | -21.8382 | 2 R.KTVVLQC chrX@1237    | 4.85E-10 | 0.009645 |
| 11Nov2011 | 21241 | 966.02  | -23.2541 | 2 R.LHFCVTV chr5@1441    | 3.11E-10 | 0.00508  |
| 11Nov2011 | 10940 | 817.43  | -16.5392 | 1 R.MTSPPRK chr2@4080    | 5.47E-10 | 0.008789 |
| 11Nov2011 | 28572 | 864.48  | -15.5938 | 2 K.KNK+14.( Splice@chr  | 5.75E-10 | 0.009517 |
| 11Nov2011 | 36878 | 949     | -15.9025 | 2 K.EYQWK+ chr3@5286     | 5.79E-10 | 0.008831 |
| 11Nov2011 | 11694 | 792.47  | 17.17106 | 2 R.RGRFGA chr3@3497     | 1.45E-10 | 0.003286 |
| 11Nov2011 | 7413  | 795.43  | -29.6343 | 2 _._M+15.99 chr5@7022   | 4.76E-10 | 0.007959 |
| 11Nov2011 | 33345 | 1062.1  | -4.48662 | 2 E.EYFFRNLS chrX@1001   | 4.44E-10 | 0.007574 |
| 11Nov2011 | 11967 | 412.22  | 23.35312 | 3 K.WGWKM chrX@1281      | 7.82E-11 | 0.001533 |
| 11Nov2011 | 32366 | 914.51  | 19.1544  | 2 K.NRPISDIP chrX@1285   | 3.10E-10 | 0.00657  |
| 11Nov2011 | 31559 | 981.54  | -7.15835 | 2 K.ARRK+14 chr5@7638    | 1.30E-10 | 0.002677 |
| 11Nov2011 | 30748 | 981.54  | -7.15835 | 2 K.ARRK+14 chr5@7638    | 3.06E-10 | 0.005879 |
| 11Nov2011 | 12682 | 668.33  | 15.48395 | 1 _._SGGGFSR chr5@1854   | 4.13E-10 | 0.006914 |
| 11Nov2011 | 3990  | 701.35  | -23.3862 | 1 R.PTGNSPK chr3@2615    | 4.11E-10 | 0.008137 |
| 11Nov2011 | 11017 | 580.97  | 3.087046 | 3 _._TTYAYTLI chr2@2360  | 2.14E-10 | 0.00493  |
| 11Nov2011 | 3178  | 731.41  | 21.89419 | 2 R.EELDSISL chr4@7427   | 2.92E-10 | 0.006415 |
| 11Nov2011 | 2908  | 731.41  | 21.89419 | 2 R.EELDSISL chr4@7427   | 8.46E-11 | 0.001585 |
| 11Nov2011 | 3134  | 731.41  | 21.89419 | 2 R.EELDSISL chr4@7427   | 1.84E-10 | 0.003793 |
| 11Nov2011 | 12329 | 800.49  | 2.290306 | 1 K.VEA AVAI Splice@chr  | 3.12E-10 | 0.005185 |
| 11Nov2011 | 3512  | 462.25  | -27.4573 | 2 R.SSRPIAHF chr1@1067   | 3.31E-10 | 0.006042 |
| 11Nov2011 | 3603  | 462.25  | -27.4573 | 2 R.SSRPIAHF chr1@1067   | 4.80E-10 | 0.00781  |

|           |       |         |          |                        |          |          |
|-----------|-------|---------|----------|------------------------|----------|----------|
| 11Nov2011 | 3707  | 462.25  | -27.4573 | 2 R.SSRPIAHf chr1@1067 | 1.59E-10 | 0.00369  |
| 11Nov2011 | 26365 | 746.38  | 17.50532 | 3 R.IFDTNNK chr4@1514  | 1.62E-11 | 1.99E-04 |
| 11Nov2011 | 28190 | 960.52  | 11.89533 | 2 _M+15.99 chr2@2367   | 2.06E-11 | 7.92E-04 |
| 11Nov2011 | 33610 | 984.47  | -24.6999 | 1 K.NYFNWLI chr1@5227  | 2.64E-10 | 0.005513 |
| 11Nov2011 | 2735  | 521.31  | -5.34053 | 2 K.FPIGATPf chrX@4552 | 2.36E-10 | 0.004704 |
| 11Nov2011 | 2182  | 419.25  | -2.4322  | 3 K.TKNLHSLI chrX@8666 | 4.17E-10 | 0.008661 |
| 11Nov2011 | 24730 | 481.28  | -22.5528 | 5 Q.FRQLPNs chr1@1269  | 5.88E-10 | 0.009032 |
| 11Nov2011 | 30665 | 994.14  | 16.57955 | 3 P.EIDGEIPA chr1@1355 | 1.79E-14 | 0        |
| 11Nov2011 | 445   | 873.48  | -16.7193 | 1 _FPAAQLA chr4@1142   | 2.97E-10 | 0.006352 |
| 11Nov2011 | 10499 | 696.33  | -9.56789 | 2 R.TDRTESV chr1@1452  | 5.10E-10 | 0.009528 |
| 11Nov2011 | 12224 | 560.32  | -6.60605 | 2 R.IAEKHFFv chr3@2035 | 7.41E-10 | 0.008932 |
| 11Nov2011 | 2871  | 849.42  | -15.7708 | 1 K.ECAKNVh chr3@1195  | 5.93E-10 | 0.009614 |
| 11Nov2011 | 2880  | 849.42  | -15.7708 | 1 K.ECAKNVh chr3@1195  | 3.83E-10 | 0.007908 |
| 11Nov2011 | 541   | 890.47  | 3.986903 | 1 R.SSTLQPEI chr3@3247 | 4.24E-10 | 0.007955 |
| 11Nov2011 | 22978 | 825.43  | 2.77927  | 2 K.M+15.99 Splice@chr | 3.92E-10 | 0.006786 |
| 11Nov2011 | 4045  | 457.25  | 19.59886 | 2 R.QANAVG chr5@1745   | 4.97E-10 | 0.008696 |
| 11Nov2011 | 3749  | 457.25  | 19.59886 | 2 R.QANAVG chr5@1745   | 8.37E-11 | 0.001585 |
| 11Nov2011 | 4036  | 457.25  | 19.59886 | 2 R.QANAVG chr5@1745   | 2.81E-10 | 0.00509  |
| 11Nov2011 | 5036  | 679.89  | -25.055  | 2 K.KNKKNNI chr5@6944  | 1.60E-10 | 0.002923 |
| 11Nov2011 | 29668 | 896.5   | 5.180052 | 1 K.HNAVTIN chr1@2319  | 1.19E-10 | 0.00219  |
| 11Nov2011 | 10530 | 769.42  | -26.3223 | 1 _NNAKPPk chr3@2451   | 5.15E-10 | 0.006509 |
| 11Nov2011 | 17540 | 808.93  | -26.3648 | 2 K.CFRIVEIP chr2@1263 | 4.18E-10 | 0.007905 |
| 11Nov2011 | 27014 | 1007.47 | -19.5528 | 3 R.SQLIPNN chr1@5738  | 6.91E-11 | 0.001866 |
| 11Nov2011 | 16172 | 1106.58 | 8.124787 | 1 K.NLVCKQE chr5@1606  | 1.11E-10 | 0.002807 |
| 11Nov2011 | 21928 | 644.84  | 25.02777 | 2 E.WYGTLCl chr5@2326  | 4.89E-10 | 0.008181 |
| 11Nov2011 | 34999 | 1217.14 | -3.28777 | 2 K.FKTQHNC chr3@3010  | 2.50E-10 | 0.004052 |
| 11Nov2011 | 34219 | 914.5   | 20.49171 | 2 R.KHIYLETc chr2@1321 | 2.40E-10 | 0.00492  |
| 11Nov2011 | 22408 | 917     | 8.168234 | 2 R.LTGNISM chrX@3443  | 4.77E-10 | 0.00916  |
| 11Nov2011 | 21690 | 605.34  | -11.3696 | 2 R.NLILRFSA chr5@1382 | 4.51E-10 | 0.008362 |
| 11Nov2011 | 21915 | 605.34  | -11.3696 | 2 R.NLILRFSA chr5@1382 | 4.40E-10 | 0.007156 |
| 11Nov2011 | 685   | 808.38  | 13.8345  | 1 K.EEGSGTT chr2@9010  | 3.16E-10 | 0.006623 |
| 11Nov2011 | 22731 | 940.97  | -5.03388 | 2 _WYPEKDI chr3@8547   | 1.47E-10 | 0.002361 |
| 11Nov2011 | 21427 | 940.97  | -5.03388 | 2 _WYPEKDI chr3@8547   | 8.88E-11 | 7.46E-04 |
| 11Nov2011 | 21489 | 940.97  | -5.03388 | 2 _WYPEKDI chr3@8547   | 8.06E-11 | 7.46E-04 |
| 11Nov2011 | 35415 | 1193.13 | 1.972886 | 2 R.RCICYTFv chr5@1304 | 8.72E-11 | 0.002079 |
| 11Nov2011 | 8290  | 524.26  | -17.4529 | 2 K.LWDNNE Splice@chr  | 1.56E-10 | 0.0037   |
| 11Nov2011 | 8835  | 524.26  | -17.4529 | 2 K.LWDNNE Splice@chr  | 4.63E-10 | 0.008953 |
| 11Nov2011 | 5483  | 921.52  | 19.51785 | 1 R.MRITNAS chrX@1004  | 4.48E-10 | 0.007574 |
| 11Nov2011 | 5409  | 921.52  | 19.51785 | 1 R.MRITNAS chrX@1004  | 3.90E-10 | 0.008017 |
| 11Nov2011 | 4885  | 921.52  | 19.51785 | 1 R.MRITNAS chrX@1004  | 2.47E-10 | 0.005523 |
| 11Nov2011 | 9709  | 739.4   | 18.15789 | 2 K.M+15.99 chr5@5476  | 4.36E-10 | 0.00932  |
| 11Nov2011 | 10766 | 739.4   | 18.15789 | 2 K.M+15.99 chr5@5476  | 2.48E-10 | 0.004964 |
| 11Nov2011 | 10209 | 739.4   | 18.15789 | 2 K.M+15.99 chr5@5476  | 5.39E-10 | 0.008084 |
| 11Nov2011 | 10779 | 739.4   | 18.15789 | 2 K.M+15.99 chr5@5476  | 2.78E-10 | 0.00509  |
| 11Nov2011 | 10753 | 739.4   | 18.15789 | 2 K.M+15.99 chr5@5476  | 5.72E-10 | 0.009942 |
| 11Nov2011 | 9187  | 739.4   | 18.15789 | 2 K.M+15.99 chr5@5476  | 1.92E-10 | 0.004829 |
| 11Nov2011 | 25424 | 1120.6  | -23.9688 | 2 K.NHGKNLI chr3@3492  | 4.03E-10 | 0.00463  |

|           |       |         |          |                         |          |          |
|-----------|-------|---------|----------|-------------------------|----------|----------|
| 11Nov2011 | 654   | 536.31  | 19.61183 | 2 K.FLEMYLK chr4@1276   | 3.73E-10 | 0.007764 |
| 11Nov2011 | 466   | 845.45  | 2.312923 | 1 K.KPTADAS chr3@9621   | 5.51E-10 | 0.008535 |
| 11Nov2011 | 6249  | 800.46  | 25.95839 | 2 _SRSQPGS Splice@chr   | 1.45E-10 | 0.002491 |
| 11Nov2011 | 32233 | 975.04  | 25.42443 | 2 _IK+14.01 chrX@1195   | 1.02E-10 | 0.001625 |
| 11Nov2011 | 15178 | 974.46  | -7.21565 | 1 R.M+15.99 chr4@8791   | 2.13E-10 | 0.004228 |
| 11Nov2011 | 7211  | 472.27  | 21.84916 | 2 R.LVSAACP chr2@1329   | 5.85E-10 | 0.009587 |
| 11Nov2011 | 20221 | 1065.56 | 29.51419 | 2 K.MCK+14. chr3@1195   | 3.36E-10 | 0.0057   |
| 11Nov2011 | 17149 | 862.51  | 7.226483 | 1 K.DLGIFIK chr4@8919   | 3.77E-10 | 0.006147 |
| 11Nov2011 | 17790 | 923.03  | 20.76567 | 2 R.TLNNLKV chr2@1060   | 3.73E-10 | 0.007764 |
| 11Nov2011 | 19250 | 923.02  | 9.903217 | 2 R.TLNNLKV chr2@1060   | 3.76E-10 | 0.006486 |
| 11Nov2011 | 13918 | 1144.59 | -9.69022 | 2 K.NVDNAPI chr3@1362   | 1.70E-10 | 0.003974 |
| 11Nov2011 | 3360  | 734.42  | 15.14642 | 1 R.VFVAAVE chr3@4371   | 2.67E-10 | 0.005811 |
| 11Nov2011 | 2603  | 551.28  | 2.184022 | 3 K.FPANRQI chr5@1217   | 1.23E-10 | 0.002142 |
| 11Nov2011 | 11708 | 607.34  | 22.41832 | 2 K.K+14.016 chr1@7165  | 5.60E-10 | 0.009119 |
| 11Nov2011 | 16876 | 938.99  | 26.35433 | 2 _TFQFSAK Splice@chr   | 3.94E-10 | 0.007898 |
| 11Nov2011 | 25899 | 668.12  | 11.52807 | 4 W.MDDPIP chr4@4767    | 3.87E-10 | 0.008145 |
| 11Nov2011 | 5666  | 613.85  | -18.5241 | 2 K.YSSFVK+1 chr5@1365  | 5.33E-10 | 0.008831 |
| 11Nov2011 | 5608  | 613.85  | -18.5241 | 2 K.YSSFVK+1 chr5@1365  | 4.09E-11 | 0.001291 |
| 11Nov2011 | 5532  | 613.85  | -18.5241 | 2 K.YSSFVK+1 chr5@1365  | 3.15E-11 | 0.001215 |
| 11Nov2011 | 6522  | 853.46  | -26.2047 | 1 R.YVTFPVK chr4@1715   | 2.71E-10 | 0.005976 |
| 11Nov2011 | 10600 | 694.32  | 13.82155 | 2 K.FPDTEQC chr1@1330   | 2.58E-10 | 0.006435 |
| 11Nov2011 | 14686 | 1173.17 | -9.30319 | 3 K.PTMRTCC Splice@chr  | 3.52E-10 | 0.006453 |
| 11Nov2011 | 14736 | 1173.5  | -13.1731 | 3 K.PTMRTCC Splice@chr  | 8.84E-14 | 0        |
| 11Nov2011 | 14045 | 1173.17 | -9.30319 | 3 K.PTMRTCC Splice@chr  | 1.57E-11 | 2.07E-04 |
| 11Nov2011 | 14128 | 1173.17 | -9.30319 | 3 K.PTMRTCC Splice@chr  | 3.12E-10 | 0.004669 |
| 11Nov2011 | 14837 | 1173.17 | -9.30319 | 3 K.PTMRTCC Splice@chr  | 1.61E-10 | 0.003488 |
| 11Nov2011 | 14169 | 1173.17 | -9.30319 | 3 K.PTMRTCC Splice@chr  | 3.24E-10 | 0.005477 |
| 11Nov2011 | 3208  | 746.43  | 7.874018 | 1 K.NEGKGLK Splice@chr  | 6.29E-10 | 0.008009 |
| 11Nov2011 | 11199 | 648.31  | -10.803  | 2 R.RYGRCSG chrX@2242   | 1.61E-10 | 0.0037   |
| 11Nov2011 | 26169 | 1042.21 | -4.74903 | 3 R.K+14.016 chr4@6097  | 1.67E-11 | 2.44E-04 |
| 11Nov2011 | 28541 | 889.48  | -23.425  | 2 _NDLRLKG chrX@6145    | 5.81E-10 | 0.009842 |
| 11Nov2011 | 19926 | 783.38  | -3.62854 | 2 R.M+15.99 chr3@1256   | 1.38E-10 | 0.002285 |
| 11Nov2011 | 6063  | 1274.07 | 6.16406  | 2 L.EDESAAV Splice@chr  | 4.37E-10 | 0.008663 |
| 11Nov2011 | 5903  | 1274.07 | 6.16406  | 2 L.EDESAAV Splice@chr  | 1.19E-10 | 0.002063 |
| 11Nov2011 | 5610  | 1274.07 | 6.16406  | 2 L.EDESAAV Splice@chr  | 4.24E-10 | 0.009035 |
| 11Nov2011 | 5074  | 1274.08 | 14.02996 | 2 L.EDESAAV Splice@chr  | 6.48E-10 | 0.008168 |
| 11Nov2011 | 5962  | 1274.07 | 6.16406  | 2 L.EDESAAV Splice@chr  | 3.30E-10 | 0.007131 |
| 11Nov2011 | 5963  | 1274.08 | 14.02996 | 2 L.EDESAAV Splice@chr  | 3.61E-10 | 0.006913 |
| 11Nov2011 | 6392  | 1274.07 | 6.16406  | 2 L.EDESAAV Splice@chr  | 1.87E-10 | 0.003358 |
| 11Nov2011 | 6160  | 1274.08 | 14.02996 | 2 L.EDESAAV Splice@chr  | 6.48E-10 | 0.009607 |
| 11Nov2011 | 6732  | 849.72  | 10.96034 | 3 L.EDESAAV Splice@chr  | 3.81E-10 | 0.006196 |
| 11Nov2011 | 6508  | 1274.07 | 6.16406  | 2 L.EDESAAV Splice@chr  | 2.93E-10 | 0.005038 |
| 11Nov2011 | 6711  | 1274.08 | 14.02996 | 2 L.EDESAAV Splice@chr  | 3.82E-10 | 0.007353 |
| 11Nov2011 | 11842 | 599.62  | 1.63138  | 3 R.NAEAAAF Splice@chr  | 4.35E-14 | 0        |
| 11Nov2011 | 11860 | 898.92  | -5.16604 | 2 R.NAEAAAF Splice@chr  | 8.23E-24 | 0        |
| 11Nov2011 | 27500 | 1152.27 | 24.69613 | 3 R.RTK+14.C Splice@chr | 1.05E-11 | 0        |
| 11Nov2011 | 3989  | 700.46  | 18.67428 | 1 R.KVGGAIR chr3@1292   | 5.57E-10 | 0.008636 |

|           |       |         |          |                          |          |          |
|-----------|-------|---------|----------|--------------------------|----------|----------|
| 11Nov2011 | 11324 | 784.46  | 12.38711 | 1 R.MKHGAL chr2@1770     | 2.46E-10 | 0.004755 |
| 11Nov2011 | 3542  | 673.39  | 2.360143 | 1 R.EVGGAIK chr3@2831    | 3.27E-10 | 0.005542 |
| 11Nov2011 | 28554 | 936.85  | -25.1171 | 3 _PK+14.01 Splice@chr   | 1.11E-10 | 0.002433 |
| 11Nov2011 | 2947  | 1069.49 | 3.915799 | 2 R.SEQQSM chr3@1199     | 5.25E-15 | 0        |
| 11Nov2011 | 8309  | 673.32  | -3.13278 | 2 R.QEM+15. chr3@1026    | 1.69E-10 | 0.003974 |
| 11Nov2011 | 18400 | 515.29  | -6.17134 | 3 K.PNFTVILS chr4@1642   | 4.10E-10 | 0.009786 |
| 11Nov2011 | 3683  | 1059.53 | -27.0998 | 1 _YDHKNAI chr5@1738     | 9.19E-11 | 0.002594 |
| 11Nov2011 | 4564  | 848.46  | 9.79508  | 1 R.FALSDPA Splice@chr   | 3.02E-10 | 0.007165 |
| 11Nov2011 | 19255 | 849.92  | 6.583873 | 2 Q.DSSYFVE Splice@chr   | 2.88E-10 | 0.006958 |
| 11Nov2011 | 13395 | 1075.05 | -16.1169 | 2 R.TCSK+14. chr2@1253   | 1.48E-10 | 0.003674 |
| 11Nov2011 | 564   | 703.38  | -2.78167 | 1 _DAAGLAC chr3@2528     | 5.21E-12 | 1.89E-04 |
| 11Nov2011 | 28046 | 1277.67 | 3.563978 | 2 R.DGSWVIL chr4@4362    | 1.67E-10 | 0.003974 |
| 11Nov2011 | 9141  | 1161.65 | -28.0507 | 1 K.NSKDKLV chr5@1250    | 3.82E-10 | 0.009194 |
| 11Nov2011 | 24343 | 957.51  | 12.42199 | 3 R.FIEPIEDIF Splice@chr | 3.20E-10 | 0.007687 |
| 11Nov2011 | 12160 | 781.41  | -6.726   | 2 K.ALEKEDIF chr1@1462   | 8.50E-16 | 0        |
| 11Nov2011 | 21966 | 1044.07 | 4.096092 | 2 R.SQLQTEV Splice@chr   | 2.16E-20 | 0        |
| 11Nov2011 | 5977  | 471.79  | -5.7044  | 2 K.IKVNFPPI chr2@3034   | 2.10E-10 | 0.005381 |
| 11Nov2011 | 9535  | 566.31  | 21.45326 | 2 R.EVAQLEC chr5@1706    | 1.94E-10 | 0.004829 |
| 11Nov2011 | 10100 | 975.55  | -13.0268 | 1 K.LPKLDAYI chr4@1149   | 3.81E-11 | 0.001131 |
| 11Nov2011 | 5846  | 937.48  | 24.27422 | 1 K.LNGGYEC chr2@1191    | 6.90E-11 | 0.001866 |
| 11Nov2011 | 8483  | 868.42  | -0.63154 | 1 K.SSSGSLSS chr2@1132   | 3.19E-10 | 0.007623 |
| 11Nov2011 | 26111 | 1000.51 | -15.4866 | 2 E.CLVVNLS Splice@chr   | 3.29E-10 | 0.007687 |
| 11Nov2011 | 20684 | 853.45  | -23.3178 | 2 K.NFKINSKI chr4@5819   | 3.59E-10 | 0.008674 |
| 11Nov2011 | 356   | 722.35  | 3.723    | 1 R.FQGGGEI chr1@2595    | 3.38E-10 | 0.008147 |
| 11Nov2011 | 5339  | 877.41  | -12.3383 | 1 K.TEDEARR chrX@1138    | 4.26E-11 | 0.001213 |
| 11Nov2011 | 9331  | 559.79  | 11.35993 | 2 R.DGWSIGI chr4@4253    | 6.95E-11 | 0.001949 |
| 11Nov2011 | 9483  | 566.31  | 21.45326 | 2 R.EVAQLEC chr5@1706    | 3.90E-10 | 0.009345 |
| 11Nov2011 | 5923  | 471.79  | -5.7044  | 2 K.IKVNFPPI chr2@3034   | 2.10E-10 | 0.005381 |
| 11Nov2011 | 25444 | 1272.28 | 27.03865 | 3 K.FAVADEE Splice@chr   | 3.33E-13 | 0        |
| 11Nov2011 | 16396 | 1090.53 | -18.1295 | 2 K.INGVTVA chr3@6296    | 1.70E-10 | 0.004152 |
| 11Nov2011 | 1810  | 444.25  | -3.23598 | 2 R.AELSSRPI chr3@8104   | 1.90E-10 | 0.004737 |
| 11Nov2011 | 1483  | 731.4   | -18.0716 | 1 _KDATAPK chr3@7059     | 1.18E-10 | 0.003304 |
| 11Nov2011 | 19441 | 1216.59 | -11.6275 | 2 L.RNTRNDI chr4@1012    | 1.50E-10 | 0.003772 |
| 11Nov2011 | 2655  | 1069.49 | 3.915799 | 2 R.SEQQSM Splice@chr    | 5.02E-14 | 0        |
| 11Nov2011 | 914   | 405.21  | -4.37903 | 2 R.IEHADPK chr4@6332    | 2.80E-10 | 0.007093 |
| 11Nov2011 | 8163  | 1161.66 | -19.4191 | 1 K.NSKDKLV chr5@1250    | 2.03E-10 | 0.005019 |
| 11Nov2011 | 19201 | 831.45  | -1.72693 | 2 R.NTRNQLI chrX@7297    | 1.52E-10 | 0.003772 |
| 11Nov2011 | 5698  | 1107.56 | -21.6943 | 1 _SSLDKESC chr5@1239    | 2.95E-11 | 6.69E-04 |
| 11Nov2011 | 2873  | 710.86  | 21.23823 | 2 R.DSTQKW chr3@1337     | 1.50E-10 | 0.003772 |
| 11Nov2011 | 7845  | 1025.61 | -11.6755 | 1 K.LGLGSGI chr5@4945    | 6.15E-12 | 3.54E-04 |
| 11Nov2011 | 9541  | 999.52  | 13.3868  | 2 R.LVSERYG chr2@8997    | 2.02E-10 | 0.004923 |
| 11Nov2011 | 18343 | 843.45  | -16.7082 | 2 K.KMFPEKI chr1@3802    | 3.82E-10 | 0.009003 |
| 11Nov2011 | 20631 | 1385.75 | 14.42536 | 1 K.FQNFAQI chr2@2226    | 1.82E-11 | 4.58E-04 |
| 11Nov2011 | 10465 | 565.83  | 14.11658 | 2 R.ISLTNANI chr5@7793   | 3.16E-10 | 0.007435 |
| 11Nov2011 | 5648  | 1107.56 | -21.6943 | 1 _SSLDKESC chr5@1239    | 3.39E-10 | 0.007998 |
| 11Nov2011 | 22046 | 791.9   | -17.5179 | 4 K.SGTIFDNI Splice@chr  | 2.53E-17 | 0        |
| 11Nov2011 | 5218  | 936.48  | 27.86052 | 1 K.LNGGYEC chr2@1191    | 3.90E-10 | 0.009176 |

|           |       |         |          |                          |          |          |
|-----------|-------|---------|----------|--------------------------|----------|----------|
| 11Nov2011 | 10135 | 625.82  | -20.2839 | 2 R.K+14.016 chrX@1356   | 1.87E-10 | 0.004737 |
| 11Nov2011 | 8145  | 739.4   | 18.15789 | 2 K.M+15.99 chr5@5476    | 3.12E-10 | 0.007344 |
| 11Nov2011 | 10418 | 565.83  | 14.11658 | 2 R.ISLTNANI chr5@7795   | 4.10E-10 | 0.009441 |
| 11Nov2011 | 9489  | 1000.02 | 11.70688 | 2 R.LVSERYG chr2@8997    | 3.03E-10 | 0.007256 |
| 11Nov2011 | 12321 | 472.29  | -0.64754 | 2 _SPLFVPKf chrX@4402    | 1.35E-10 | 0.003596 |
| 11Nov2011 | 5163  | 936.48  | 27.86052 | 1 K.LNGGYEC chr2@1191    | 1.94E-10 | 0.004923 |
| 11Nov2011 | 294   | 890.47  | 3.986903 | 1 R.SSTLQPEI chr3@3247   | 4.14E-10 | 0.009441 |
| 11Nov2011 | 16253 | 990.49  | -21.8765 | 2 F.RLSESELE chr4@7519   | 6.29E-11 | 0.001393 |
| 11Nov2011 | 3094  | 412.23  | 25.3069  | 2 R.IASYQGG chrX@1679    | 3.07E-11 | 6.69E-04 |
| 11Nov2011 | 8514  | 566.31  | 21.45326 | 2 R.EVAQLEC chr5@1706    | 5.89E-11 | 0.001287 |
| 11Nov2011 | 5007  | 741.38  | -23.1647 | 2 K.FPENRHI chr2@1477    | 9.84E-11 | 0.002605 |
| 11Nov2011 | 19308 | 895.5   | -12.868  | 2 K.M+15.99 chrX@1449    | 8.39E-13 | 1.35E-04 |
| 11Nov2011 | 643   | 722.35  | 3.723    | 1 R.FQGGGEI chr1@2595    | 3.33E-10 | 0.007906 |
| 11Nov2011 | 7950  | 559.79  | 11.35993 | 2 R.DGWSIG chr4@4255     | 4.05E-10 | 0.009358 |
| 11Nov2011 | 20752 | 1003.19 | 17.13413 | 3 R.CWNRRRA Splice@chr   | 5.89E-13 | 1.35E-04 |
| 11Nov2011 | 21629 | 957.83  | -2.70061 | 3 R.FIEPIEDIF Splice@chr | 1.76E-11 | 4.58E-04 |
| 11Nov2011 | 5478  | 626.3   | -9.76097 | 2 R.LCESGAA Splice@chr   | 4.93E-16 | 0        |
| 11Nov2011 | 8466  | 566.31  | 21.45326 | 2 R.EVAQLEC chr5@1706    | 1.21E-10 | 0.003304 |
| 11Nov2011 | 8790  | 724.35  | 19.12636 | 3 V.CLTEEGK Splice@chr   | 2.46E-10 | 0.006064 |
| 11Nov2011 | 8232  | 559.79  | 11.35993 | 2 R.DGWSIG chr4@4255     | 1.93E-10 | 0.004923 |
| 11Nov2011 | 2551  | 439.74  | 18.7116  | 2 R.SIAMFGP chr2@4157    | 4.57E-11 | 8.74E-04 |
| 11Nov2011 | 14679 | 719.39  | 28.86707 | 2 R.FTQAGSE Splice@chr   | 1.86E-13 | 0        |
| 11Nov2011 | 3943  | 921.52  | 19.51785 | 1 R.MRITNAS chrX@1004    | 3.88E-10 | 0.009176 |
| 11Nov2011 | 11482 | 1345.63 | -24.7692 | 2 _QVREMH Splice@chr     | 3.58E-10 | 0.008264 |
| 11Nov2011 | 613   | 549.29  | -12.2451 | 2 _HKNFPD chr3@1042      | 3.33E-10 | 0.007906 |
| 11Nov2011 | 22576 | 963.14  | 25.74479 | 3 _GCSIVPIS Splice@chr   | 1.25E-10 | 0.003304 |
| 11Nov2011 | 425   | 703.38  | -2.78167 | 1 _DAAGLAC chr3@2528     | 5.12E-12 | 2.49E-04 |
| 11Nov2011 | 19080 | 1215.61 | 4.623127 | 1 K.PAIADIAI chr3@1256   | 9.94E-11 | 0.002605 |
| 11Nov2011 | 12486 | 749.39  | -17.0141 | 2 _RLQHAM Splice@chr     | 4.10E-11 | 7.67E-04 |
| 11Nov2011 | 21650 | 957.5   | 1.956888 | 3 R.FIEPIEDIF Splice@chr | 1.84E-10 | 0.004644 |
| 11Nov2011 | 4943  | 741.38  | -23.1647 | 2 K.FPENRHI chr2@1477    | 1.32E-10 | 0.003596 |
| 11Nov2011 | 2671  | 1068.99 | 5.486428 | 2 R.SEQQSM chr3@1199     | 2.52E-15 | 0        |
| 11Nov2011 | 8107  | 1161.66 | -19.4191 | 1 K.NSKDKLV chr5@1250    | 2.05E-10 | 0.005101 |
| 11Nov2011 | 11541 | 1345.63 | -24.7692 | 2 _QVREMH Splice@chr     | 7.87E-11 | 0.002207 |
| 11Nov2011 | 4119  | 948.48  | 18.96187 | 1 R.ENKENW chr3@9915     | 2.60E-10 | 0.006539 |
| 11Nov2011 | 15037 | 622.7   | -11.061  | 3 P.RNWGKG chrX@1446     | 3.89E-10 | 0.009176 |
| 11Nov2011 | 22419 | 917.51  | 5.964791 | 2 _SIMSRLEI Splice@chr   | 3.62E-10 | 0.008264 |
| 11Nov2011 | 22693 | 1147.26 | 22.17633 | 3 R.FQSAAIG Splice@chr   | 3.70E-13 | 0        |
| 11Nov2011 | 3053  | 412.23  | 25.3069  | 2 R.IASYQGG chrX@1679    | 1.56E-10 | 0.003868 |
| 11Nov2011 | 8655  | 1063.58 | 1.14882  | 1 K.YLINGNEI chr1@8687   | 1.38E-10 | 0.003772 |
| 11Nov2011 | 418   | 702.38  | 2.001521 | 1 _DAAGLAC chr3@2528     | 5.12E-12 | 2.49E-04 |
| 11Nov2011 | 10481 | 1130.65 | 12.16972 | 1 R.ISLTNANI chr5@7795   | 4.02E-10 | 0.009266 |
| 11Nov2011 | 654   | 702.38  | 2.001521 | 1 _DAAGLAC chr3@2528     | 5.12E-12 | 0        |
| 11Nov2011 | 5039  | 876.4   | -19.8707 | 1 K.TEDEARR chrX@1138    | 4.26E-11 | 0.001245 |
| 11Nov2011 | 21852 | 1385.75 | 14.42536 | 1 K.FQNFAQI chr2@2226    | 2.07E-10 | 0.005786 |
| 11Nov2011 | 5872  | 626.8   | -12.4435 | 2 R.LCESGAA Splice@chr   | 8.15E-16 | 0        |
| 11Nov2011 | 16046 | 687.41  | 21.43028 | 2 E.M+15.99 chr2@8546    | 1.85E-10 | 0.005011 |

|           |       |         |          |                         |          |          |
|-----------|-------|---------|----------|-------------------------|----------|----------|
| 11Nov2011 | 21295 | 1133.59 | -6.23448 | 3 K.HQLVSAF Splice@chr  | 3.56E-13 | 0        |
| 11Nov2011 | 21899 | 864.45  | 24.03456 | 2 R.KSSTLMR chr4@165    | 2.14E-10 | 0.005786 |
| 11Nov2011 | 5096  | 876.41  | -8.50606 | 1 K.TEDEARR chrX@113    | 4.26E-11 | 0.001245 |
| 11Nov2011 | 19147 | 1275.6  | -25.4649 | 3 R.YSSECPE( Splice@chr | 1.47E-11 | 3.60E-04 |
| 11Nov2011 | 3621  | 735.86  | -3.36466 | 2 _._KNNFNS( chr5@161   | 2.08E-10 | 0.005786 |
| 11Nov2011 | 11601 | 521.28  | 1.17314  | 3 K.ALEKEDIF chr1@146   | 2.71E-11 | 8.12E-04 |
| 11Nov2011 | 22034 | 1003.18 | 7.145987 | 3 R.CWNRRA Splice@chr   | 1.62E-11 | 3.60E-04 |
| 11Nov2011 | 9043  | 566.31  | 21.45326 | 2 R.EVAQLEC chr5@170    | 5.34E-11 | 0.001352 |
| 11Nov2011 | 13481 | 974.46  | -7.21565 | 1 R.M+15.99 chr4@879    | 1.76E-10 | 0.004499 |
| 11Nov2011 | 6110  | 1107.56 | -21.6943 | 1 _._SSLDKES( chr5@123  | 1.82E-10 | 0.004804 |
| 11Nov2011 | 3043  | 710.86  | 21.23823 | 2 R.DSTQKW chr3@133     | 1.46E-10 | 0.003585 |
| 11Nov2011 | 8406  | 1025.61 | -11.6755 | 1 K.LGLGSGL chr5@494    | 3.33E-11 | 9.19E-04 |
| 11Nov2011 | 2734  | 1068.99 | 5.486428 | 2 R.SEQQSM Splice@chr   | 4.62E-14 | 0        |
| 11Nov2011 | 21341 | 1133.59 | -6.23448 | 3 K.HQLVSAF Splice@chr  | 5.31E-12 | 0        |
| 11Nov2011 | 23557 | 792.15  | -18.5783 | 4 K.SGTIFDNI Splice@chr | 3.44E-17 | 0        |
| 11Nov2011 | 11592 | 781.42  | 6.100329 | 2 K.ALEKEDIF chr1@146   | 4.82E-16 | 0        |
| 11Nov2011 | 3190  | 412.23  | 25.3069  | 2 R.IASYQGG chrX@167    | 4.38E-11 | 0.001245 |
| 11Nov2011 | 18430 | 938.97  | -25.6377 | 2 L.GVADEKS chr2@102    | 1.63E-10 | 0.003887 |
| 11Nov2011 | 11135 | 1130.64 | 3.300733 | 1 R.ISLTNANI chr5@779   | 2.59E-10 | 0.006856 |
| 11Nov2011 | 23507 | 791.9   | -17.5179 | 4 K.SGTIFDNI Splice@chr | 1.05E-17 | 0        |
| 11Nov2011 | 9386  | 786.87  | -27.8038 | 2 S.WSTTSST chr1@647    | 2.28E-10 | 0.006081 |
| 11Nov2011 | 4463  | 431.74  | 5.455516 | 2 _._PIQDVYK Splice@chr | 1.80E-10 | 0.004599 |
| 11Nov2011 | 15996 | 687.41  | 21.43028 | 2 E.M+15.99 chr2@854    | 3.50E-10 | 0.009027 |
| 11Nov2011 | 10730 | 625.82  | -20.2839 | 2 R.K+14.016 chrX@135   | 8.82E-11 | 0.00229  |
| 11Nov2011 | 263   | 848.41  | 2.093776 | 1 R.EEAELEK. chr2@480   | 2.25E-10 | 0.005875 |
| 11Nov2011 | 24312 | 1147.24 | 4.705638 | 3 R.FQSAAIG Splice@chr  | 1.88E-12 | 0        |
| 11Nov2011 | 2663  | 439.74  | 18.7116  | 2 R.SIAMFGP chr2@415    | 1.36E-10 | 0.003393 |
| 11Nov2011 | 8855  | 559.79  | 11.35993 | 2 R.DGWSIG( chr4@425    | 3.79E-10 | 0.009802 |
| 11Nov2011 | 8850  | 1119.58 | 15.34876 | 1 R.DGWSIG( chr4@425    | 8.06E-11 | 0.002191 |
| 11Nov2011 | 22079 | 1003.52 | 12.6889  | 3 R.CWNRRA Splice@chr   | 1.17E-13 | 0        |
| 11Nov2011 | 22850 | 668.12  | 11.52807 | 4 W.MDDPIP chr4@476     | 3.38E-10 | 0.008849 |
| 11Nov2011 | 13039 | 472.29  | -0.64754 | 2 _._SPLFVPKI chrX@440  | 1.30E-10 | 0.003311 |
| 11Nov2011 | 19521 | 843.45  | -16.7082 | 2 K.KMFPEKI chr1@380    | 1.60E-10 | 0.003887 |
| 11Nov2011 | 3401  | 1059.53 | -27.0998 | 1 _._YDHKNAI chr5@173   | 5.16E-11 | 0.001352 |
| 11Nov2011 | 11105 | 565.83  | 14.11658 | 2 R.ISLTNANI chr5@779   | 3.59E-10 | 0.009027 |
| 11Nov2011 | 5455  | 936.48  | 27.86052 | 1 K.LNGGYEC chr2@119    | 2.48E-11 | 7.03E-04 |
| 11Nov2011 | 4991  | 876.41  | -8.50606 | 1 K.TEDEARR chrX@113    | 1.63E-10 | 0.003887 |
| 11Nov2011 | 11027 | 1130.64 | 3.300733 | 1 R.ISLTNANI chr5@779   | 3.03E-10 | 0.008204 |
| 11Nov2011 | 685   | 536.31  | 19.61183 | 2 K.FLEMYLK chr4@127    | 2.65E-10 | 0.00703  |
| 11Nov2011 | 5508  | 936.48  | 27.86052 | 1 K.LNGGYEC chr2@119    | 4.08E-11 | 0.001142 |
| 11Nov2011 | 22136 | 1003.19 | 17.13413 | 3 R.CWNRRA Splice@chr   | 4.47E-12 | 0        |
| 11Nov2011 | 8804  | 559.79  | 11.35993 | 2 R.DGWSIG( chr4@425    | 1.86E-10 | 0.005113 |
| 11Nov2011 | 10078 | 784.46  | 12.38711 | 1 R.MKHGAL chr2@177     | 2.58E-10 | 0.006856 |
| 11Nov2011 | 4104  | 833.46  | -4.25508 | 1 R.DMVQLV chrX@981     | 2.88E-10 | 0.007515 |
| 11Nov2011 | 5157  | 604.31  | 24.98924 | 2 K.ERDRYSP chr5@731    | 2.26E-10 | 0.005875 |
| 11Nov2011 | 21189 | 1133.59 | -6.23448 | 3 K.HQLVSAF Splice@chr  | 2.39E-14 | 0        |
| 11Nov2011 | 12793 | 559.32  | 28.75221 | 2 R.IGMDLM Splice@chr   | 5.17E-11 | 0.001352 |

|           |       |         |          |                         |          |          |
|-----------|-------|---------|----------|-------------------------|----------|----------|
| 11Nov2011 | 11051 | 565.82  | -3.62141 | 2 R.ISLTNANI chr5@7795  | 1.80E-10 | 0.004599 |
| 11Nov2011 | 21304 | 574.82  | -9.25392 | 2 K.TLNTTHL' Splice@chr | 2.06E-10 | 0.005786 |
| 11Nov2011 | 5571  | 471.79  | -5.7044  | 2 K.IKVNFPPI chr2@3034  | 2.68E-10 | 0.00703  |
| 11Nov2011 | 10213 | 1000.02 | 11.70688 | 2 R.LVSERYG chr2@8997   | 2.43E-10 | 0.006564 |
| 11Nov2011 | 10984 | 1130.64 | 3.300733 | 1 R.ISLTNANI chr5@7795  | 3.40E-10 | 0.008849 |
| 11Nov2011 | 6161  | 1107.56 | -21.6943 | 1 _..SSLDKESC chr5@1235 | 1.25E-11 | 3.60E-04 |
| 11Nov2011 | 16396 | 852.9   | -9.81548 | 2 R.FQMQNLC chr1@1224   | 1.30E-10 | 0.003311 |
| 11Nov2011 | 17373 | 990.49  | -21.8765 | 2 F.RLSESELE chr4@7515  | 3.14E-10 | 0.008468 |
| 11Nov2011 | 11005 | 565.83  | 14.11658 | 2 R.ISLTNANI chr5@7795  | 1.17E-10 | 0.003219 |
| 11Nov2011 | 666   | 703.38  | -2.78167 | 1 _..DAAGLAC chr3@2528  | 5.12E-12 | 0        |
| 11Nov2011 | 23461 | 980.48  | -7.04314 | 3 K.SGTIFDNI Splice@chr | 9.09E-11 | 0.00229  |
| 11Nov2011 | 21888 | 1385.74 | 7.1914   | 1 K.FQNFQAI chr2@2226   | 6.18E-11 | 0.001675 |
| 11Nov2011 | 12732 | 1075.06 | -6.79295 | 2 R.TCSK+14. chr2@1255  | 3.26E-10 | 0.008662 |
| 11Nov2011 | 2940  | 710.86  | 21.23823 | 2 R.DSTQKW chr3@1337    | 1.38E-10 | 0.003393 |
| 11Nov2011 | 8729  | 1161.67 | -10.7876 | 1 K.NSKDKLV chr5@1250   | 7.90E-11 | 0.001982 |
| 11Nov2011 | 5903  | 626.3   | -9.76097 | 2 R.LCESGAA Splice@chr  | 1.86E-16 | 0        |
| 11Nov2011 | 8500  | 559.79  | 11.35993 | 2 R.DGWSIGL chr4@4255   | 1.40E-10 | 0.003393 |
| 11Nov2011 | 21241 | 1133.59 | -6.23448 | 3 K.HQLVSAF Splice@chr  | 1.87E-11 | 4.78E-04 |
| 11Nov2011 | 8911  | 559.79  | 11.35993 | 2 R.DGWSIGL chr4@4255   | 1.24E-10 | 0.003311 |
| 11Nov2011 | 2989  | 710.86  | 21.23823 | 2 R.DSTQKW chr3@1337    | 1.25E-10 | 0.003311 |
| 11Nov2011 | 13366 | 974.46  | -7.21565 | 1 R.M+15.99 chr4@8791   | 2.16E-10 | 0.005786 |
| 11Nov2011 | 11954 | 559.32  | 28.75221 | 2 R.IGMDLM chr3@1180    | 2.53E-10 | 0.006967 |
| 11Nov2011 | 20775 | 1133.59 | -6.23448 | 3 K.HQLVSAF Splice@chr  | 1.01E-12 | 0        |
| 11Nov2011 | 5748  | 626.3   | -9.76097 | 2 R.LCESGAA Splice@chr  | 3.09E-16 | 0        |
| 11Nov2011 | 7869  | 868.42  | -0.63154 | 1 K.SSSGSLSS chr2@1132  | 2.82E-10 | 0.007792 |
| 11Nov2011 | 1335  | 632.78  | -25.4076 | 2 _..KM+15.9 Splice@chr | 8.78E-11 | 0.00257  |
| 11Nov2011 | 13013 | 974.46  | -7.21565 | 1 R.M+15.99 chr4@8791   | 2.96E-10 | 0.007792 |
| 11Nov2011 | 23083 | 1377.31 | 9.123562 | 3 P.PM+15.9 Splice@chr  | 1.03E-10 | 0.002968 |
| 11Nov2011 | 19031 | 843.45  | -16.7082 | 2 K.KMFPEKI chr1@3802   | 1.47E-10 | 0.00427  |
| 11Nov2011 | 8674  | 559.79  | 11.35993 | 2 R.DGWSIGL chr4@4255   | 1.20E-10 | 0.003685 |
| 11Nov2011 | 9855  | 1000.02 | 11.70688 | 2 R.LVSERYG chr2@8997   | 3.17E-10 | 0.008431 |
| 11Nov2011 | 15741 | 687.41  | 21.43028 | 2 E.M+15.99 chr2@8546   | 2.20E-10 | 0.006109 |
| 11Nov2011 | 5840  | 626.3   | -9.76097 | 2 R.LCESGAA Splice@chr  | 1.42E-15 | 0        |
| 11Nov2011 | 15537 | 887.93  | 29.43791 | 2 I.DEREESTM Splice@chr | 6.03E-11 | 0.001856 |
| 11Nov2011 | 1378  | 632.78  | -25.4076 | 2 _..KM+15.9 Splice@chr | 1.53E-10 | 0.004672 |
| 11Nov2011 | 20822 | 1133.59 | -6.23448 | 3 K.HQLVSAF Splice@chr  | 9.76E-13 | 0        |
| 11Nov2011 | 9179  | 786.87  | -27.8038 | 2 S.WSTTSST chr1@6478   | 2.87E-10 | 0.007792 |
| 11Nov2011 | 2656  | 439.74  | 18.7116  | 2 R.SIAMFGP chr2@4157   | 6.70E-11 | 0.001957 |
| 11Nov2011 | 22757 | 1055.87 | -13.022  | 3 K.SGTIFDNI Splice@chr | 2.94E-13 | 0        |
| 11Nov2011 | 15205 | 923.03  | 20.76567 | 2 R.TLNNLKV chr2@1060   | 2.24E-10 | 0.006186 |
| 11Nov2011 | 8568  | 559.79  | 11.35993 | 2 R.DGWSIGL chr4@4255   | 5.02E-11 | 0.001757 |
| 11Nov2011 | 17115 | 515.29  | -6.17134 | 3 K.PNFTVILS chr4@1642  | 3.56E-10 | 0.009186 |
| 11Nov2011 | 8270  | 559.79  | 11.35993 | 2 R.DGWSIGL chr4@4255   | 1.23E-10 | 0.003786 |
| 11Nov2011 | 8497  | 1161.67 | -10.7876 | 1 K.NSKDKLV Splice@chr  | 1.82E-10 | 0.005237 |
| 11Nov2011 | 2739  | 710.86  | 21.23823 | 2 R.DSTQKW chr3@1337    | 1.92E-11 | 6.96E-04 |
| 11Nov2011 | 5298  | 741.39  | -17.2291 | 2 K.QKSNWH chr5@1225    | 3.08E-11 | 0.001137 |
| 11Nov2011 | 5231  | 1274.08 | 14.02996 | 2 L.EDESAAV Splice@chr  | 4.95E-11 | 0.001658 |

|           |       |         |          |                          |          |          |
|-----------|-------|---------|----------|--------------------------|----------|----------|
| 11Nov2011 | 8604  | 1119.58 | 15.34876 | 1 R.DGWSIG( chr4@425     | 1.07E-10 | 0.002968 |
| 11Nov2011 | 8595  | 1118.57 | 9.393791 | 1 R.DGWSIG( chr4@425     | 1.61E-10 | 0.004964 |
| 11Nov2011 | 16982 | 990.49  | -21.8765 | 2 F.RLSESELE chr4@751    | 3.81E-10 | 0.009849 |
| 11Nov2011 | 3253  | 412.23  | 25.3069  | 2 R.IASYQGG chrX@167     | 7.33E-11 | 0.002056 |
| 11Nov2011 | 11927 | 1345.63 | -24.7692 | 2 _QVREMH Splice@chr     | 2.37E-10 | 0.006382 |
| 11Nov2011 | 20704 | 1133.59 | -6.23448 | 3 K.HQLVSAF Splice@chr   | 7.76E-15 | 0        |
| 11Nov2011 | 2702  | 439.74  | 18.7116  | 2 R.SIAMFGP chr2@415     | 1.93E-11 | 6.96E-04 |
| 11Nov2011 | 5340  | 741.39  | -17.2291 | 2 K.QKSNWH chr5@122      | 4.31E-11 | 0.001552 |
| 11Nov2011 | 11278 | 781.42  | 6.100329 | 2 K.ALEKEDIF chr1@146    | 2.89E-15 | 0        |
| 11Nov2011 | 14799 | 894.4   | 2.427875 | 2 _FSDDDVT Splice@chr    | 1.34E-11 | 2.38E-04 |
| 11Nov2011 | 10371 | 625.82  | -20.2839 | 2 R.K+14.016 chrX@135    | 3.15E-10 | 0.008431 |
| 11Nov2011 | 20304 | 1044.57 | 2.487942 | 2 R.SQLQTEV Splice@chr   | 1.33E-22 | 0        |
| 11Nov2011 | 5802  | 626.8   | -12.4435 | 2 R.LCESGAA Splice@chr   | 3.99E-16 | 0        |
| 11Nov2011 | 6069  | 1107.57 | -12.7508 | 1 _SSLDKES( chr5@123     | 4.93E-11 | 0.001658 |
| 11Nov2011 | 3205  | 412.23  | 25.3069  | 2 R.IASYQGG chrX@167     | 3.72E-10 | 0.009753 |
| 11Nov2011 | 649   | 703.38  | -2.78167 | 1 _DAAGLAC chr3@252      | 1.20E-11 | 2.38E-04 |
| 11Nov2011 | 5531  | 936.48  | 27.86052 | 1 K.LNGGYEC chr2@119     | 2.24E-11 | 8.06E-04 |
| 11Nov2011 | 22310 | 957.84  | 7.76449  | 3 R.FIEPIEDIF Splice@chr | 7.97E-11 | 0.002368 |
| 11Nov2011 | 5477  | 936.48  | 27.86052 | 1 K.LNGGYEC chr2@119     | 4.40E-11 | 0.001552 |
| 11Nov2011 | 20648 | 1133.59 | -6.23448 | 3 K.HQLVSAF Splice@chr   | 7.29E-14 | 0        |
| 11Nov2011 | 6016  | 1107.57 | -12.7508 | 1 _SSLDKES( chr5@123     | 4.35E-11 | 0.001552 |
| 11Nov2011 | 2773  | 710.86  | 21.23823 | 2 R.DSTQKW chr3@133      | 1.25E-10 | 0.003886 |
| 11Nov2011 | 20766 | 574.82  | -9.25392 | 2 K.TLNTTHL' Splice@chr  | 3.43E-10 | 0.008904 |
| 11Nov2011 | 9857  | 999.52  | 13.3868  | 2 R.LVSERYG chr2@899     | 2.26E-10 | 0.006186 |
| 11Nov2011 | 18615 | 1275.6  | -25.4649 | 3 R.YSSECPE( Splice@chr  | 1.63E-10 | 0.004964 |
| 11Nov2011 | 438   | 722.35  | 3.723    | 1 R.FQGGGEI chr1@259     | 3.33E-10 | 0.008715 |
| 11Nov2011 | 5543  | 471.79  | -5.7044  | 2 K.IKVNFPPI chr2@303    | 3.47E-10 | 0.008999 |
| 11Nov2011 | 4991  | 876.41  | -8.50606 | 1 K.TEDEARR chrX@113     | 4.26E-11 | 0.001552 |
| 11Nov2011 | 11312 | 521.28  | 1.17314  | 3 K.ALEKEDIF chr1@146    | 4.23E-11 | 0.001552 |
| 11Nov2011 | 10759 | 565.83  | 14.11658 | 2 R.ISLTNANI chr5@779    | 2.74E-10 | 0.007225 |
| 11Nov2011 | 5426  | 936.48  | 27.86052 | 1 K.LNGGYEC chr2@119     | 2.49E-10 | 0.006669 |
| 11Nov2011 | 12459 | 559.32  | 28.75221 | 2 R.IGMDLM Splice@chr    | 5.74E-11 | 0.001856 |
| 11Nov2011 | 3011  | 710.86  | 21.23823 | 2 R.DSTQKW chr3@133      | 8.91E-12 | 2.38E-04 |
| 11Nov2011 | 3054  | 710.86  | 21.23823 | 2 R.DSTQKW chr3@133      | 8.77E-12 | 2.38E-04 |
| 11Nov2011 | 5045  | 876.41  | -8.50606 | 1 K.TEDEARR chrX@113     | 4.26E-11 | 0.001552 |
| 11Nov2011 | 20715 | 574.82  | -9.25392 | 2 K.TLNTTHL' Splice@chr  | 1.77E-10 | 0.005147 |
| 11Nov2011 | 7599  | 579.81  | -21.5115 | 2 _KIAESGSF chr4@169     | 3.11E-10 | 0.00826  |
| 11Nov2011 | 3400  | 1059.54 | -17.6437 | 1 _YDHKNAI chr5@173      | 7.89E-11 | 0.002368 |
| 11Nov2011 | 2971  | 710.86  | 21.23823 | 2 R.DSTQKW chr3@133      | 6.53E-11 | 0.001957 |
| 11Nov2011 | 20309 | 1044.07 | 4.096092 | 2 R.SQLQTEV Splice@chr   | 1.25E-19 | 0        |
| 11Nov2011 | 8820  | 566.31  | 21.45326 | 2 R.EVAQLEC chr5@170     | 2.10E-10 | 0.006019 |
| 11Nov2011 | 23431 | 1147.25 | 13.44098 | 3 R.FQSAAIG Splice@chr   | 3.46E-13 | 0        |
| 11Nov2011 | 22743 | 792.15  | -18.5783 | 4 K.SGTIFDNI Splice@chr  | 5.03E-18 | 0        |
| 11Nov2011 | 1247  | 632.78  | -25.4076 | 2 _KM+15.9 Splice@chr    | 1.09E-10 | 0.003176 |
| 11Nov2011 | 8616  | 559.79  | 11.35993 | 2 R.DGWSIG( chr4@425     | 2.94E-10 | 0.007792 |
| 11Nov2011 | 10812 | 565.83  | 14.11658 | 2 R.ISLTNANI chr5@779    | 1.15E-10 | 0.003482 |
| 11Nov2011 | 8323  | 559.79  | 11.35993 | 2 R.DGWSIG( chr4@425     | 3.18E-10 | 0.008431 |

|           |       |         |          |                          |          |          |
|-----------|-------|---------|----------|--------------------------|----------|----------|
| 11Nov2011 | 14989 | 893.9   | 4.30649  | 2 _ .FSDDDVT Splice@chr  | 2.45E-10 | 0.006572 |
| 11Nov2011 | 30686 | 1272.28 | 27.03865 | 3 K.FAVADEE Splice@chr   | 1.84E-10 | 0.003328 |
| 11Nov2011 | 26598 | 849.91  | -5.21446 | 2 Q.DSSYFVE Splice@chr   | 3.92E-10 | 0.006509 |
| 11Nov2011 | 11152 | 1063.58 | 1.14882  | 1 K.YLINGNEI chr1@8687   | 1.58E-10 | 0.002881 |
| 11Nov2011 | 28642 | 1135.56 | 14.02138 | 2 _ .DMDYAFI Splice@chr  | 4.23E-12 | 1.37E-04 |
| 11Nov2011 | 18869 | 719.39  | 28.86707 | 2 R.FTQAGSE Splice@chr   | 9.58E-13 | 1.37E-04 |
| 11Nov2011 | 18628 | 894.41  | 13.57006 | 2 _ .FSDDDVT Splice@chr  | 1.31E-12 | 1.37E-04 |
| 11Nov2011 | 10651 | 1089.65 | -29.1532 | 1 K.KLKSMKN chr5@3701    | 1.70E-10 | 0.003163 |
| 11Nov2011 | 28646 | 1135.06 | 15.50052 | 2 _ .DMDYAFI Splice@chr  | 2.11E-10 | 0.004105 |
| 11Nov2011 | 28881 | 957.5   | 22.57714 | 3 K.LFQVLQN Splice@chr   | 9.80E-11 | 0.002289 |
| 11Nov2011 | 5626  | 971.56  | 13.66301 | 1 _ .DSPIRNR chr2@3547   | 3.13E-10 | 0.005609 |
| 11Nov2011 | 15187 | 897.42  | -27.6753 | 3 _ .QVREMH Splice@chr   | 5.23E-10 | 0.008849 |
| 11Nov2011 | 13910 | 1173.17 | -9.30319 | 3 K.PTMRTCC Splice@chr   | 3.25E-11 | 9.54E-04 |
| 11Nov2011 | 11676 | 821.44  | 15.92055 | 1 K.TGFGING chrX@2647    | 3.52E-10 | 0.006206 |
| 11Nov2011 | 31569 | 1000.5  | -25.5062 | 2 E.CLVVNLS Splice@chr   | 1.02E-10 | 0.002401 |
| 11Nov2011 | 15215 | 954.44  | -18.1567 | 2 C.QREEIEY Splice@chr   | 5.22E-10 | 0.008849 |
| 11Nov2011 | 30350 | 1074.57 | 17.09359 | 2 K.YFKINILEI chr2@1186  | 1.45E-10 | 0.002657 |
| 11Nov2011 | 26426 | 665.37  | -26.6417 | 2 Q.INNK+14 Splice@chr   | 2.71E-10 | 0.005027 |
| 11Nov2011 | 11162 | 1064.58 | -2.00842 | 1 K.YLINGNEI chr1@8687   | 8.81E-11 | 0.002182 |
| 11Nov2011 | 12958 | 765.38  | -12.3766 | 1 R.SPEHAPK chr5@4294    | 1.98E-10 | 0.003778 |
| 11Nov2011 | 16058 | 599.34  | -5.64446 | 3 _ .INKFLIFK chr4@1511  | 6.00E-10 | 0.009662 |
| 11Nov2011 | 15748 | 472.29  | -0.64754 | 2 _ .SPLFVPKF chrX@4402  | 1.30E-10 | 0.002551 |
| 11Nov2011 | 20079 | 685.88  | 4.188613 | 2 K.IVPGGGA chrX@1570    | 2.08E-15 | 0        |
| 11Nov2011 | 27042 | 890.44  | 14.86661 | 2 K.GWSVPLI Splice@chr   | 3.16E-11 | 9.54E-04 |
| 11Nov2011 | 13301 | 565.83  | 14.11658 | 2 R.ISLTNANI chr5@7793   | 5.66E-10 | 0.009306 |
| 11Nov2011 | 20587 | 858.47  | -5.67211 | 3 _ .LETGIKPI Splice@chr | 7.43E-15 | 0        |
| 11Nov2011 | 26323 | 890.45  | 26.12723 | 2 K.GWSVPLI Splice@chr   | 5.82E-10 | 0.009455 |
| 11Nov2011 | 15659 | 1075.05 | -16.1169 | 2 R.TCSK+14 chr2@1253    | 1.96E-10 | 0.003778 |
| 11Nov2011 | 27069 | 1215.58 | -28.9352 | 3 E.IGQKNQ Splice@chr    | 2.71E-10 | 0.005027 |
| 11Nov2011 | 6698  | 741.38  | -23.1647 | 2 K.FPENRHL chr2@1477    | 4.42E-10 | 0.007416 |
| 11Nov2011 | 29187 | 957.5   | 22.57714 | 3 K.LFQVLQN Splice@chr   | 8.98E-11 | 0.002238 |
| 11Nov2011 | 18107 | 1289.2  | -19.8826 | 2 K.TKKQKKK chrX@6244    | 2.38E-10 | 0.004548 |
| 11Nov2011 | 11810 | 862.47  | 2.904885 | 1 _ .PIQDVYK Splice@chr  | 5.55E-10 | 0.009151 |
| 11Nov2011 | 7839  | 546.78  | -19.0827 | 2 K.ETETGITC chr4@1221   | 3.00E-10 | 0.005283 |
| 11Nov2011 | 27091 | 1384.74 | 9.615872 | 1 K.FQNFAQI chr2@2226    | 5.35E-10 | 0.008948 |
| 11Nov2011 | 24015 | 1366.17 | -16.3461 | 2 K.TAQFTT Splice@chr    | 2.53E-10 | 0.004818 |
| 11Nov2011 | 11894 | 976.56  | -6.19805 | 1 K.LPKLDAYI chr4@1149   | 4.10E-10 | 0.006717 |
| 11Nov2011 | 9997  | 868.42  | -0.63154 | 1 K.SSSGSLSS chr2@1132   | 2.13E-10 | 0.004105 |
| 11Nov2011 | 28539 | 1135.56 | 14.02138 | 2 _ .DMDYAFI Splice@chr  | 6.18E-14 | 0        |
| 11Nov2011 | 28544 | 1135.06 | 15.50052 | 2 _ .DMDYAFI Splice@chr  | 4.94E-13 | 7.85E-05 |
| 11Nov2011 | 9566  | 547.79  | 14.47103 | 2 K.AISFVGGI chr2@1172   | 1.69E-10 | 0.003108 |
| 11Nov2011 | 3145  | 801.45  | 3.812604 | 1 R.IEAGGGC chr5@8776    | 2.91E-12 | 1.37E-04 |
| 11Nov2011 | 27197 | 798.15  | -11.5616 | 4 K.SGDAGIV Splice@chr   | 4.20E-11 | 0.001441 |
| 11Nov2011 | 11920 | 724.35  | 19.12636 | 3 V.CLTEEGK Splice@chr   | 3.40E-11 | 0.001016 |
| 11Nov2011 | 11919 | 1086.02 | 18.22629 | 2 V.CLTEEGK Splice@chr   | 3.38E-12 | 1.37E-04 |
| 11Nov2011 | 5115  | 833.46  | -4.25508 | 1 R.DMVQLV chrX@9811     | 3.05E-10 | 0.005393 |
| 11Nov2011 | 16103 | 662.86  | 7.984656 | 2 S.INM+15.5 chr4@2551   | 2.59E-10 | 0.00487  |

|           |       |         |          |                          |          |          |
|-----------|-------|---------|----------|--------------------------|----------|----------|
| 11Nov2011 | 29029 | 957.5   | 1.956888 | 3 R.FIEPIEDIF Splice@chr | 4.83E-10 | 0.008272 |
| 11Nov2011 | 28927 | 957.5   | 1.956888 | 3 R.FIEPIEDIF Splice@chr | 3.91E-10 | 0.006509 |
| 11Nov2011 | 11221 | 1064.58 | -2.00842 | 1 K.YLINGNEI chr1@8687   | 7.49E-11 | 0.002182 |
| 11Nov2011 | 30505 | 968.46  | 13.6538  | 3 _GCSIVPIS Splice@chr   | 1.05E-10 | 0.002401 |
| 11Nov2011 | 10408 | 677.34  | -8.57314 | 2 K.MQQFST chr5@2080     | 2.56E-10 | 0.00487  |
| 11Nov2011 | 16687 | 671.37  | -24.0361 | 2 T.FNIVHTQ Splice@chr   | 3.48E-10 | 0.006151 |
| 11Nov2011 | 15079 | 1346.12 | -11.1429 | 2 _QVREMH Splice@chr     | 1.96E-10 | 0.003778 |
| 11Nov2011 | 2870  | 888.52  | 29.02223 | 1 R.YNLHTLK Splice@chr   | 4.37E-10 | 0.007366 |
| 11Nov2011 | 302   | 819.42  | 5.602837 | 1 _KNEGASC chr1@1181     | 6.82E-11 | 0.002087 |
| 11Nov2011 | 30945 | 1027.59 | -24.0001 | 2 I.KNELKSKA chrX@6127   | 3.72E-10 | 0.006303 |
| 11Nov2011 | 23644 | 1033.54 | 12.33206 | 2 V.VK+14.01 chr4@1676   | 3.98E-10 | 0.006561 |
| 11Nov2011 | 24160 | 910.99  | -12.6489 | 2 Y.FKNIDKD Splice@chr   | 9.00E-11 | 0.002238 |
| 11Nov2011 | 1596  | 632.78  | -25.4076 | 2 _KM+15.9 Splice@chr    | 2.45E-10 | 0.004596 |
| 11Nov2011 | 18992 | 719.38  | 14.92317 | 2 R.FTQAGSE Splice@chr   | 1.40E-12 | 1.37E-04 |
| 11Nov2011 | 19564 | 687.41  | 21.43028 | 2 E.M+15.99 chr2@8546    | 4.69E-10 | 0.008126 |
| 11Nov2011 | 15274 | 954.44  | -18.1567 | 2 C.QREEIEY Splice@chr   | 4.05E-10 | 0.006717 |
| 11Nov2011 | 26407 | 1133.59 | -6.23448 | 3 K.HQLVSAF Splice@chr   | 6.11E-13 | 7.85E-05 |
| 11Nov2011 | 20025 | 685.88  | 4.188613 | 2 K.IVPGGGA chrX@1570    | 2.08E-11 | 5.17E-04 |
| 11Nov2011 | 28592 | 1135.56 | 14.02138 | 2 _DMDYAF Splice@chr     | 1.98E-13 | 7.85E-05 |
| 11Nov2011 | 28593 | 1135.06 | 15.50052 | 2 _DMDYAF Splice@chr     | 2.57E-11 | 5.79E-04 |
| 11Nov2011 | 19313 | 887.93  | 29.43791 | 2 I.DEREESTM Splice@chr  | 1.37E-10 | 0.002607 |
| 11Nov2011 | 13016 | 765.38  | -12.3766 | 1 R.SPEHAPK chr5@4294    | 5.53E-10 | 0.009151 |
| 11Nov2011 | 21045 | 990.49  | -21.8765 | 2 F.RLSESELE chr4@7519   | 1.06E-10 | 0.002454 |
| 11Nov2011 | 30582 | 1272.28 | 27.03865 | 3 K.FAVADEE Splice@chr   | 1.37E-14 | 0        |
| 11Nov2011 | 6804  | 936.48  | 27.86052 | 1 K.LNGGYEC chr2@1191    | 5.02E-10 | 0.008592 |
| 11Nov2011 | 27143 | 798.15  | -11.5616 | 4 K.SGDAGIV Splice@chr   | 1.42E-10 | 0.002657 |
| 11Nov2011 | 14658 | 1173.17 | -9.30319 | 3 K.PTMRTCC Splice@chr   | 1.50E-11 | 3.95E-04 |
| 11Nov2011 | 11681 | 975.55  | -13.0268 | 1 K.LPKLDAYI chr4@1149   | 1.06E-10 | 0.002454 |
| 11Nov2011 | 11974 | 724.35  | 19.12636 | 3 V.CLTEEGK Splice@chr   | 6.83E-12 | 1.37E-04 |
| 11Nov2011 | 11975 | 1086.01 | 9.000639 | 2 V.CLTEEGK Splice@chr   | 1.13E-11 | 2.68E-04 |
| 11Nov2011 | 4382  | 473.76  | -9.231   | 2 R.TSGALSL chr1@2011    | 2.05E-10 | 0.003886 |
| 11Nov2011 | 31611 | 1000.5  | -25.5062 | 2 E.CLVVNLS Splice@chr   | 9.04E-11 | 0.002238 |
| 11Nov2011 | 444   | 722.35  | 3.723    | 1 R.FQGGGEI chr1@2595    | 4.48E-10 | 0.007416 |
| 11Nov2011 | 29150 | 876.99  | -11.1881 | 2 V.FPCK+14 chrX@2447    | 1.85E-10 | 0.003328 |
| 11Nov2011 | 10711 | 1089.65 | -29.1532 | 1 K.KLKSMKN chr5@3701    | 8.12E-11 | 0.002182 |
| 11Nov2011 | 7651  | 463.77  | 1.18704  | 2 K.PVNIENTI chrX@1210   | 1.29E-10 | 0.002551 |
| 11Nov2011 | 1935  | 915.47  | 1.201399 | 1 K.FHEIGGQ chrX@4727    | 1.30E-10 | 0.002551 |
| 11Nov2011 | 12420 | 560.6   | -22.2499 | 3 _EMFSAAI chr4@3419     | 3.60E-10 | 0.006256 |
| 11Nov2011 | 5756  | 756.43  | -9.04908 | 1 R.PLSAAAA chr5@3132    | 3.18E-10 | 0.005609 |
| 11Nov2011 | 6268  | 1274.07 | 6.16406  | 2 L.EDESAAV Splice@chr   | 4.20E-10 | 0.006877 |
| 11Nov2011 | 14898 | 505.58  | -23.7891 | 3 K.LSSDDFV chr1@3182    | 1.16E-10 | 0.002502 |
| 11Nov2011 | 15069 | 897.42  | -27.6753 | 3 _QVREMH Splice@chr     | 3.12E-10 | 0.005609 |
| 11Nov2011 | 31446 | 911.42  | 20.49399 | 2 _PRM+15. Splice@chr    | 9.42E-11 | 0.002289 |
| 11Nov2011 | 34084 | 1155.59 | 29.18146 | 2 R.AWQALL chr2@1382     | 1.68E-10 | 0.00305  |
| 11Nov2011 | 20536 | 858.47  | -5.67211 | 3 _LETGIKPI Splice@chr   | 5.72E-13 | 7.85E-05 |
| 11Nov2011 | 26843 | 855.97  | -19.7491 | 2 K.IFTQTK+1 Splice@chr  | 3.91E-10 | 0.006509 |
| 11Nov2011 | 10615 | 739.4   | 18.15789 | 2 K.M+15.99 chr5@5476    | 3.49E-10 | 0.006151 |

|           |       |         |          |                         |          |          |
|-----------|-------|---------|----------|-------------------------|----------|----------|
| 11Nov2011 | 674   | 552.3   | 10.18569 | 2 R.TQNATAI Splice@chr  | 1.04E-11 | 2.68E-04 |
| 11Nov2011 | 19622 | 687.41  | 21.43028 | 2 E.M+15.99 chr2@8546   | 3.55E-10 | 0.006256 |
| 11Nov2011 | 30986 | 1027.59 | -24.0001 | 2 I.KNELKSKA chrX@6127  | 5.13E-10 | 0.008743 |
| 11Nov2011 | 822   | 632.78  | -25.4076 | 2 _KM+15.9 Splice@chr   | 1.55E-10 | 0.002827 |
| 11Nov2011 | 13020 | 746.36  | -23.1469 | 2 R.SYHYVAF Splice@chr  | 1.45E-10 | 0.002657 |
| 11Nov2011 | 30762 | 1216.58 | -19.8654 | 2 L.RNTRNDI chr4@1012   | 3.93E-10 | 0.006561 |
| 11Nov2011 | 32186 | 962.46  | -26.3952 | 3 R.WFWGQI chr4@3030    | 4.61E-10 | 0.007909 |
| 11Nov2011 | 19890 | 924.41  | -11.8314 | 2 Q.KPDDISN Splice@chr  | 2.84E-10 | 0.00523  |
| 11Nov2011 | 10290 | 1025.61 | -11.6755 | 1 K.LGLGSGL chr5@4945   | 2.92E-11 | 9.54E-04 |
| 11Nov2011 | 5573  | 971.56  | 2.079638 | 1 R.NGQLNRI chr4@6924   | 4.52E-10 | 0.007525 |
| 11Nov2011 | 23590 | 1033.54 | 12.33206 | 2 V.VK+14.01 chr4@1676  | 2.08E-10 | 0.003999 |
| 11Nov2011 | 14781 | 1173.17 | -9.30319 | 3 K.PTMRTCC Splice@chr  | 1.01E-10 | 0.002401 |
| 11Nov2011 | 14785 | 505.58  | -23.7891 | 3 K.LSSDDFV chr1@3182   | 3.40E-10 | 0.00593  |
| 11Nov2011 | 20544 | 664.7   | 1.197202 | 3 _PTLNK+1 chr1@6526    | 1.51E-10 | 0.00277  |
| 11Nov2011 | 24068 | 1366.17 | -16.3461 | 2 K.TAQFTT Splice@chr   | 2.72E-10 | 0.005074 |
| 11Nov2011 | 27873 | 1024.52 | -27.8903 | 2 F.K+14.016 chr4@8225  | 5.50E-10 | 0.009151 |
| 11Nov2011 | 18066 | 924.91  | -13.6479 | 2 Q.KPDDISN Splice@chr  | 5.74E-10 | 0.009402 |
| 11Nov2011 | 18067 | 924.4   | -22.6053 | 2 Q.KPDDISN Splice@chr  | 6.02E-10 | 0.009712 |
| 11Nov2011 | 6649  | 741.38  | -23.1647 | 2 K.FPENRHI chr2@1477   | 4.16E-10 | 0.006824 |
| 11Nov2011 | 32514 | 850.95  | 7.150724 | 2 R.FSEVYRN Splice@chr  | 4.92E-10 | 0.008322 |
| 11Nov2011 | 6863  | 936.48  | 27.86052 | 1 K.LNGGYEC chr2@1191   | 4.52E-11 | 0.001441 |
| 11Nov2011 | 22464 | 849.92  | 6.583873 | 2 Q.DSSYFVE Splice@chr  | 1.69E-12 | 1.37E-04 |
| 11Nov2011 | 21882 | 1034.57 | -2.45085 | 2 K.FK+14.01 Splice@chr | 9.47E-12 | 2.68E-04 |
| 11Nov2011 | 18927 | 719.38  | 14.92317 | 2 R.FTQAGSE Splice@chr  | 1.43E-13 | 0        |
| 11Nov2011 | 26390 | 890.44  | 14.86661 | 2 K.GWSVPLI Splice@chr  | 3.80E-10 | 0.00641  |
| 11Nov2011 | 23819 | 784.42  | -26.6807 | 3 _LVK+14.0 Splice@chr  | 4.40E-11 | 0.001441 |
| 11Nov2011 | 33105 | 1147.25 | 13.44098 | 3 R.FQSAAIG Splice@chr  | 3.44E-14 | 0        |
| 11Nov2011 | 18033 | 1289.2  | -19.8826 | 2 K.TKKQKKK chrX@6244   | 2.20E-10 | 0.004212 |
| 11Nov2011 | 27149 | 1063.86 | -15.3899 | 3 K.SGDAGIV Splice@chr  | 1.39E-10 | 0.002657 |
| 11Nov2011 | 13972 | 1173.16 | -17.9121 | 3 K.PTMRTCC Splice@chr  | 7.52E-11 | 0.002182 |
| 11Nov2011 | 793   | 632.78  | -25.4076 | 2 _KM+15.9 Splice@chr   | 2.87E-10 | 0.00523  |
| 11Nov2011 | 21128 | 990.49  | -21.8765 | 2 F.RLSESELE chr4@7515  | 2.42E-10 | 0.004596 |
| 11Nov2011 | 15493 | 1173.49 | -21.7126 | 3 K.PTMRTCC Splice@chr  | 2.11E-13 | 7.85E-05 |
| 11Nov2011 | 11100 | 1063.58 | 1.14882  | 1 K.YLINGNEI chr1@8687  | 5.74E-10 | 0.009402 |
| 11Nov2011 | 11105 | 1064.58 | -2.00842 | 1 K.YLINGNEI chr1@8687  | 7.75E-11 | 0.002182 |
| 11Nov2011 | 29759 | 741.87  | -26.1725 | 2 K.KIFLQM+ chr2@1507   | 2.33E-10 | 0.004494 |
| 11Nov2011 | 22412 | 849.93  | 18.38221 | 2 Q.DSSYFVE Splice@chr  | 2.04E-11 | 4.57E-04 |
| 11Nov2011 | 25354 | 1216.58 | -19.8654 | 2 L.RNTRNDI chr4@1012   | 3.61E-10 | 0.006303 |
| 11Nov2011 | 6328  | 1274.07 | 6.16406  | 2 L.EDESAAV Splice@chr  | 4.02E-10 | 0.006671 |
| 11Nov2011 | 25025 | 831.45  | -1.72693 | 2 R.NTRNQLI chrX@7297   | 4.12E-10 | 0.006717 |
| 11Nov2011 | 11210 | 1063.58 | 1.14882  | 1 K.YLINGNEI chr1@8687  | 3.68E-10 | 0.006303 |
| 11Nov2011 | 10594 | 1089.65 | -29.1532 | 1 K.KLKSMKN chr5@3701   | 1.69E-10 | 0.003108 |
| 11Nov2011 | 14712 | 1173.5  | -13.1731 | 3 K.PTMRTCC Splice@chr  | 1.42E-11 | 3.95E-04 |
| 11Nov2011 | 24535 | 969.01  | -11.2595 | 2 Y.QRHVFNI Splice@chr  | 5.11E-10 | 0.008743 |
| 11Nov2011 | 9876  | 868.42  | -0.63154 | 1 K.SSSGSLSS chr2@1132  | 3.25E-10 | 0.005829 |
| 11Nov2011 | 11335 | 862.47  | 2.904885 | 1 _PIQDVYK Splice@chr   | 1.80E-10 | 0.003717 |
| 11Nov2011 | 14083 | 1173.17 | -9.30319 | 3 K.PTMRTCC Splice@chr  | 1.79E-10 | 0.003717 |

|           |       |         |          |                        |          |          |
|-----------|-------|---------|----------|------------------------|----------|----------|
| 11Nov2011 | 3140  | 802.45  | -0.37858 | 1 R.IEAGGGG chr5@8776  | 2.54E-11 | 6.28E-04 |
| 11Nov2011 | 7321  | 463.77  | 1.18704  | 2 K.PVNIENLI chrX@1210 | 7.68E-11 | 0.001849 |
| 11Nov2011 | 8980  | 493.78  | -11.3951 | 2 R.KNQENLI Splice@chr | 2.51E-10 | 0.00447  |
| 11Nov2011 | 10994 | 724.35  | 19.12636 | 3 V.CLTEEGK Splice@chr | 2.73E-11 | 6.28E-04 |
| 11Nov2011 | 14452 | 1345.63 | -24.7692 | 2 _QVREMH Splice@chr   | 2.27E-10 | 0.004238 |
| 11Nov2011 | 15416 | 749.39  | -17.0141 | 2 _RLLQHAN Splice@chr  | 9.20E-12 | 2.21E-04 |
| 11Nov2011 | 25340 | 665.37  | -26.6417 | 2 Q.INNK+14 Splice@chr | 5.28E-10 | 0.009518 |
| 11Nov2011 | 25346 | 889.95  | -19.8868 | 2 K.RSSVHTE chr2@8442  | 3.93E-10 | 0.006737 |
| 11Nov2011 | 28908 | 968.13  | 18.26018 | 3 _GCSIVPIS Splice@chr | 5.00E-11 | 0.001148 |
| 11Nov2011 | 25991 | 798.15  | -11.5616 | 4 K.SGDAGIV Splice@chr | 2.52E-11 | 6.28E-04 |
| 11Nov2011 | 23244 | 910.99  | -12.6489 | 2 Y.FKNIDKD Splice@chr | 4.22E-10 | 0.007483 |
| 11Nov2011 | 25913 | 890.44  | 14.86661 | 2 K.GWSVPLI Splice@chr | 9.44E-12 | 2.21E-04 |
| 11Nov2011 | 28934 | 968.47  | 23.9199  | 3 _GCSIVPIS Splice@chr | 1.87E-10 | 0.003774 |
| 11Nov2011 | 3114  | 801.45  | 3.812604 | 1 R.IEAGGGG chr5@8776  | 3.82E-12 | 7.56E-05 |
| 11Nov2011 | 699   | 552.3   | 10.18569 | 2 R.TQNATAI Splice@chr | 5.01E-11 | 0.001148 |
| 11Nov2011 | 23121 | 1366.17 | -16.3461 | 2 K.TAQFTTT Splice@chr | 2.16E-11 | 5.63E-04 |
| 11Nov2011 | 29206 | 1027.59 | -24.0001 | 2 I.KNELKSKA chrX@6127 | 2.03E-10 | 0.003816 |
| 11Nov2011 | 17722 | 894.41  | 13.57006 | 2 _FSDDDVT Splice@chr  | 2.00E-10 | 0.003816 |
| 11Nov2011 | 5531  | 756.43  | -9.04908 | 1 R.PLSAAAA chr5@3132  | 4.47E-10 | 0.007656 |
| 11Nov2011 | 16707 | 1111.11 | -2.0893  | 2 R.LLM+15.5 chr4@3284 | 1.24E-10 | 0.002896 |
| 11Nov2011 | 14391 | 1345.63 | -24.7692 | 2 _QVREMH Splice@chr   | 3.31E-10 | 0.005752 |
| 11Nov2011 | 14024 | 1173.17 | -9.30319 | 3 K.PTMRTCC Splice@chr | 6.12E-11 | 0.001533 |
| 11Nov2011 | 17253 | 1289.21 | -12.1094 | 2 K.TKKQKKK chrX@6244  | 1.99E-10 | 0.003816 |
| 11Nov2011 | 27707 | 957.5   | 22.57714 | 3 K.LFQVLQN Splice@chr | 3.76E-10 | 0.006385 |
| 11Nov2011 | 6421  | 741.38  | -23.1647 | 2 K.FPENRHI chr2@1477  | 2.21E-10 | 0.004238 |
| 11Nov2011 | 11027 | 1086.02 | 18.22629 | 2 V.CLTEEGK Splice@chr | 7.02E-12 | 1.48E-04 |
| 11Nov2011 | 23306 | 910.99  | -12.6489 | 2 Y.FKNIDKD Splice@chr | 5.45E-11 | 0.001474 |
| 11Nov2011 | 32107 | 506.57  | 1.126789 | 3 _DWHHTF Splice@chr   | 1.11E-11 | 2.87E-04 |
| 11Nov2011 | 13173 | 1173.17 | -9.30319 | 3 K.PTMRTCC Splice@chr | 2.07E-10 | 0.003816 |
| 11Nov2011 | 22477 | 760.72  | 18.35362 | 3 R.RAINGTE Splice@chr | 2.48E-10 | 0.00447  |
| 11Nov2011 | 29348 | 959.52  | -27.8897 | 2 K.KSNFFRFI chr3@1331 | 2.38E-10 | 0.004355 |
| 11Nov2011 | 8740  | 434.24  | 13.9946  | 3 _RSNDQTI chr5@6378   | 2.41E-10 | 0.004413 |
| 11Nov2011 | 10343 | 1090.66 | -23.0402 | 1 K.KLKSMKN chr5@3701  | 4.06E-11 | 8.84E-04 |
| 11Nov2011 | 24115 | 831.45  | -1.72693 | 2 R.NTRNQLF chrX@7297  | 3.23E-10 | 0.005517 |
| 11Nov2011 | 7576  | 546.78  | -19.0827 | 2 K.ETETGITC chr4@1221 | 7.07E-11 | 0.001659 |
| 11Nov2011 | 9456  | 868.42  | -0.63154 | 1 K.SSSGSLSS chr2@1132 | 1.91E-10 | 0.003774 |
| 11Nov2011 | 27359 | 1135.06 | 15.50052 | 2 _DMDYAFI Splice@chr  | 1.36E-10 | 0.003012 |
| 11Nov2011 | 22902 | 784.42  | -26.6807 | 3 _LVK+14.0 Splice@chr | 4.05E-11 | 8.84E-04 |
| 11Nov2011 | 11409 | 724.35  | 19.12636 | 3 V.CLTEEGK Splice@chr | 8.03E-12 | 1.48E-04 |
| 11Nov2011 | 5375  | 971.56  | 13.66301 | 1 _DSPIIRNR chr2@3547  | 1.02E-10 | 0.002589 |
| 11Nov2011 | 17303 | 1289.2  | -19.8826 | 2 K.TKKQKKK chrX@6244  | 2.88E-10 | 0.004935 |
| 11Nov2011 | 26186 | 1385.75 | 14.42536 | 1 K.FQNFAQI chr2@2226  | 7.85E-11 | 0.001849 |
| 11Nov2011 | 28975 | 968.13  | 18.26018 | 3 _GCSIVPIS Splice@chr | 8.42E-12 | 1.48E-04 |
| 11Nov2011 | 24061 | 831.45  | -1.72693 | 2 R.NTRNQLF chrX@7297  | 2.85E-10 | 0.004874 |
| 11Nov2011 | 26037 | 1064.2  | -10.2401 | 3 K.SGDAGIV Splice@chr | 7.37E-12 | 1.48E-04 |
| 11Nov2011 | 18141 | 719.39  | 28.86707 | 2 R.FTQAGSE Splice@chr | 1.09E-13 | 7.56E-05 |
| 11Nov2011 | 8685  | 434.24  | 13.9946  | 3 _RSNDQTI chr5@6378   | 2.87E-10 | 0.004874 |

|           |       |         |          |                         |          |          |
|-----------|-------|---------|----------|-------------------------|----------|----------|
| 11Nov2011 | 18254 | 719.39  | 28.86707 | 2 R.FTQAGSE Splice@chr  | 2.47E-13 | 7.56E-05 |
| 11Nov2011 | 10806 | 1064.58 | -2.00842 | 1 K.YLINGNEI chr1@8687  | 1.28E-10 | 0.002958 |
| 11Nov2011 | 24412 | 1216.59 | -11.6275 | 2 L.RNTRNDI chr4@1012   | 1.03E-10 | 0.002589 |
| 11Nov2011 | 11466 | 724.35  | 19.12636 | 3 V.CLTEEGK Splice@chr  | 3.08E-13 | 7.56E-05 |
| 11Nov2011 | 17996 | 894.41  | 13.57006 | 2 _FDSDDTV Splice@chr   | 2.24E-12 | 7.56E-05 |
| 11Nov2011 | 18194 | 719.39  | 28.86707 | 2 R.FTQAGSE Splice@chr  | 1.19E-13 | 7.56E-05 |
| 11Nov2011 | 32084 | 506.57  | 1.126789 | 3 _DWHHTF Splice@chr    | 2.55E-10 | 0.00447  |
| 11Nov2011 | 11243 | 975.55  | -13.0268 | 1 K.LPKLDAYI chr4@1149  | 3.81E-11 | 8.84E-04 |
| 11Nov2011 | 16152 | 671.37  | -24.0361 | 2 T.FNIVHTQ Splice@chr  | 3.48E-10 | 0.005861 |
| 11Nov2011 | 20983 | 1034.57 | -2.45085 | 2 K.FK+14.01 Splice@chr | 4.14E-12 | 7.56E-05 |
| 11Nov2011 | 23046 | 1356.82 | 14.40578 | 1 W.FLLLRQV Splice@chr  | 5.59E-10 | 0.009965 |
| 11Nov2011 | 26043 | 798.15  | -11.5616 | 4 K.SGDAGIV Splice@chr  | 1.57E-11 | 3.59E-04 |
| 11Nov2011 | 19793 | 858.48  | 6.006088 | 3 _LETGIKPI Splice@chr  | 2.47E-13 | 7.56E-05 |
| 11Nov2011 | 10361 | 1089.65 | -29.1532 | 1 K.KLKSMKN chr5@3701   | 4.06E-10 | 0.007032 |
| 11Nov2011 | 21526 | 849.93  | 18.38221 | 2 Q.DSSYFVE Splice@chr  | 2.45E-12 | 7.56E-05 |
| 11Nov2011 | 22682 | 1033.54 | 12.33206 | 2 V.VK+14.01 chr4@1676  | 3.33E-10 | 0.005752 |
| 11Nov2011 | 22882 | 1356.82 | 14.40578 | 1 W.FLLLRQV Splice@chr  | 5.35E-10 | 0.009623 |
| 11Nov2011 | 696   | 536.31  | 19.61183 | 2 K.FLEMYLK chr4@1276   | 4.32E-10 | 0.007483 |
| 11Nov2011 | 30498 | 1147.25 | 13.44098 | 3 R.FQSAAIG Splice@chr  | 3.51E-17 | 0        |
| 11Nov2011 | 19904 | 1049.52 | 5.532542 | 3 G.DQSVDSI chr4@9163   | 5.08E-10 | 0.009114 |
| 11Nov2011 | 10699 | 1063.58 | 1.14882  | 1 K.YLINGNEI chr1@8687  | 2.70E-10 | 0.0047   |
| 11Nov2011 | 16093 | 671.37  | -24.0361 | 2 T.FNIVHTQ Splice@chr  | 4.60E-10 | 0.00807  |
| 11Nov2011 | 18833 | 687.41  | 21.43028 | 2 E.M+15.99 chr2@8546   | 9.68E-11 | 0.002475 |
| 11Nov2011 | 17363 | 1289.21 | -12.1094 | 2 K.TKKQKKK chrX@6244   | 4.10E-10 | 0.007087 |
| 11Nov2011 | 17360 | 924.91  | -13.6479 | 2 Q.KPDDISN Splice@chr  | 9.73E-11 | 0.002475 |
| 11Nov2011 | 17362 | 924.41  | -11.8314 | 2 Q.KPDDISN Splice@chr  | 4.84E-10 | 0.008892 |
| 11Nov2011 | 28438 | 741.88  | -12.6527 | 2 K.KIFLQM+ chr2@1507   | 4.65E-10 | 0.008188 |
| 11Nov2011 | 25962 | 890.44  | 14.86661 | 2 K.GWSVPLI Splice@chr  | 2.89E-10 | 0.004996 |
| 11Nov2011 | 10048 | 677.34  | -8.57314 | 2 K.MQQFSTI chr5@2080   | 5.38E-10 | 0.009623 |
| 11Nov2011 | 17416 | 924.41  | -11.8314 | 2 Q.KPDDISN Splice@chr  | 3.70E-10 | 0.006385 |
| 11Nov2011 | 26015 | 1385.75 | 14.42536 | 1 K.FQNFQAI chr2@2226   | 2.11E-11 | 4.96E-04 |
| 11Nov2011 | 12851 | 565.83  | 14.11658 | 2 R.ISLTNANI chr5@7793  | 3.42E-10 | 0.005861 |
| 11Nov2011 | 9251  | 579.81  | -21.5115 | 2 _KIAESGSF chr4@1695   | 5.07E-10 | 0.009114 |
| 11Nov2011 | 18578 | 887.93  | 29.43791 | 2 I.DEREESTM Splice@chr | 1.50E-10 | 0.003313 |
| 11Nov2011 | 4822  | 837.45  | -19.6495 | 1 K.TYIVGQR chr4@5607   | 5.37E-10 | 0.009623 |
| 11Nov2011 | 7131  | 519.6   | -26.5197 | 3 K.IGSM+15 chr5@1654   | 1.96E-10 | 0.003816 |
| 11Nov2011 | 20395 | 1090.53 | -18.1295 | 2 K.INGVTVA chr3@6296   | 7.49E-11 | 0.001787 |
| 11Nov2011 | 27395 | 1135.56 | 14.02138 | 2 _DMDYAFI Splice@chr   | 4.62E-13 | 7.56E-05 |
| 11Nov2011 | 27396 | 1135.06 | 15.50052 | 2 _DMDYAFI Splice@chr   | 1.12E-10 | 0.002589 |
| 11Nov2011 | 10750 | 1063.58 | 1.14882  | 1 K.YLINGNEI chr1@8687  | 2.71E-10 | 0.0047   |
| 11Nov2011 | 10751 | 1064.58 | -2.00842 | 1 K.YLINGNEI chr1@8687  | 9.74E-11 | 0.002475 |
| 11Nov2011 | 11408 | 1086.02 | 18.22629 | 2 V.CLTEEGK Splice@chr  | 2.22E-11 | 5.63E-04 |
| 11Nov2011 | 17929 | 894.41  | 13.57006 | 2 _FDSDDTV Splice@chr   | 3.53E-12 | 7.56E-05 |
| 11Nov2011 | 19312 | 685.88  | 4.188613 | 2 K.IVPGGGA chrX@1570   | 1.39E-14 | 0        |
| 11Nov2011 | 16489 | 914     | 0.03462  | 2 K.VGINYQP chr1@8356   | 2.11E-10 | 0.003998 |
| 11Nov2011 | 9997  | 677.34  | -8.57314 | 2 K.MQQFSTI chr5@2080   | 1.07E-10 | 0.002589 |
| 11Nov2011 | 19733 | 858.48  | 6.006088 | 3 _LETGIKPI Splice@chr  | 4.02E-12 | 7.56E-05 |

|           |       |         |          |                          |          |          |
|-----------|-------|---------|----------|--------------------------|----------|----------|
| 11Nov2011 | 7529  | 546.78  | -19.0827 | 2 K.ETETGITC chr4@1221   | 4.81E-11 | 9.48E-04 |
| 11Nov2011 | 6371  | 741.39  | -17.2291 | 2 K.QKSNWH chr5@1229     | 3.69E-11 | 8.23E-04 |
| 11Nov2011 | 17807 | 894.41  | 13.57006 | 2 _._FSDDDVT Splice@chr  | 5.71E-11 | 0.001474 |
| 11Nov2011 | 465   | 722.35  | 3.723    | 1 R.FQGGGEI chr1@2595    | 3.42E-10 | 0.005861 |
| 11Nov2011 | 26141 | 855.48  | -6.07153 | 2 K.IFTQTK+1 Splice@chr  | 2.07E-10 | 0.003816 |
| 11Nov2011 | 14714 | 1173.5  | -13.1731 | 3 K.PTMRTCC Splice@chr   | 2.86E-15 | 0        |
| 11Nov2011 | 23312 | 1169.62 | 22.07753 | 2 _._QAFWKR Splice@chr   | 2.97E-10 | 0.005113 |
| 11Nov2011 | 7357  | 553.78  | -25.7264 | 2 _._SSLDKESC chr5@1239  | 4.12E-10 | 0.007146 |
| 11Nov2011 | 5943  | 685.38  | -12.3964 | 2 K.ISTQTHIC chr4@7638   | 1.56E-10 | 0.003559 |
| 11Nov2011 | 20448 | 1090.53 | -18.1295 | 2 K.INGVTVA chr3@6296    | 9.46E-11 | 0.00242  |
| 11Nov2011 | 10703 | 1064.59 | 7.411911 | 1 K.YLINGNEI chr1@8687   | 2.90E-11 | 7.62E-04 |
| 11Nov2011 | 32116 | 506.57  | 1.126789 | 3 _._DWHHTF Splice@chr   | 6.22E-11 | 0.001533 |
| 11Nov2011 | 21800 | 1078.01 | -10.6297 | 2 G.QYVQST! chr2@4322    | 3.97E-10 | 0.006737 |
| 11Nov2011 | 31237 | 1129.08 | -6.57578 | 2 R.K+14.016 chr2@5339   | 4.24E-10 | 0.007483 |
| 11Nov2011 | 26070 | 1385.75 | 14.42536 | 1 K.FQNFAQI chr2@2226    | 1.08E-10 | 0.002589 |
| 11Nov2011 | 540   | 1000.59 | 27.93569 | 1 R.KNKEQQI Splice@chr   | 5.39E-10 | 0.009623 |
| 11Nov2011 | 16091 | 851.49  | -3.4814  | 2 K.RGVRLSH chr2@2785    | 2.93E-10 | 0.005113 |
| 11Nov2011 | 7470  | 875.49  | 11.27984 | 2 K.KIILM+15 chr4@5840   | 4.75E-10 | 0.00932  |
| 11Nov2011 | 11081 | 560.81  | 10.68504 | 2 R.PDFSLNS chr3@3320    | 4.79E-10 | 0.009364 |
| 11Nov2011 | 12577 | 746.36  | -23.1469 | 2 R.SYHYVAF Splice@chr   | 2.67E-10 | 0.005364 |
| 11Nov2011 | 23086 | 804.91  | 25.79416 | 2 _._LTMTWN chr1@4515    | 4.99E-10 | 0.00969  |
| 11Nov2011 | 6151  | 876.41  | -8.50606 | 1 K.TEDEARR chrX@1138    | 4.26E-11 | 7.73E-04 |
| 11Nov2011 | 27534 | 1024.52 | -27.8903 | 2 F.K+14.016 chr4@8225   | 5.07E-10 | 0.00974  |
| 11Nov2011 | 10299 | 507.78  | 21.88395 | 2 Q.DPVEDG Splice@chr    | 1.40E-10 | 0.002801 |
| 11Nov2011 | 20680 | 833.92  | -21.2254 | 2 _._IIEPYVAV Splice@chr | 4.77E-12 | 0        |
| 11Nov2011 | 20770 | 990.49  | -21.8765 | 2 F.RLSESELE chr4@7519   | 4.32E-10 | 0.008626 |
| 11Nov2011 | 24742 | 831.45  | -1.72693 | 2 R.NTRNQLF chrX@7297    | 3.56E-10 | 0.007143 |
| 11Nov2011 | 6183  | 604.31  | 24.98924 | 2 K.ERDRYSP chr5@7314    | 4.82E-10 | 0.009364 |
| 11Nov2011 | 8694  | 434.24  | 13.9946  | 3 _._RSNDQTI chr5@6378   | 4.21E-10 | 0.008459 |
| 11Nov2011 | 3735  | 457.25  | 19.59886 | 2 R.QANAVG chr5@1745     | 3.99E-10 | 0.00821  |
| 11Nov2011 | 25998 | 889.95  | -19.8868 | 2 K.RSSVHTE chr2@8442    | 4.52E-10 | 0.008888 |
| 11Nov2011 | 25066 | 1216.58 | -19.8654 | 2 L.RNTRNDI chr4@1012    | 2.36E-10 | 0.004866 |
| 11Nov2011 | 16707 | 1106.51 | -25.9146 | 1 R.M+15.99 chr5@9235    | 3.51E-10 | 0.007143 |
| 11Nov2011 | 5982  | 876.4   | -19.8707 | 1 K.TEDEARR chrX@1138    | 4.72E-11 | 8.34E-04 |
| 11Nov2011 | 10823 | 1063.58 | 1.14882  | 1 K.YLINGNEI chr1@8687   | 3.89E-10 | 0.008042 |
| 11Nov2011 | 1389  | 710.36  | -9.42683 | 2 R.NFFDK+1 chr4@1075    | 1.34E-10 | 0.002801 |
| 11Nov2011 | 12667 | 765.38  | -12.3766 | 1 R.SPEHAPK chr5@4294    | 1.98E-10 | 0.003948 |
| 11Nov2011 | 17432 | 1090.64 | 2.300686 | 1 L.SLIILAM+ Splice@chr  | 5.11E-10 | 0.009847 |
| 11Nov2011 | 23221 | 1033.54 | 12.33206 | 2 V.VK+14.01 chr4@1676   | 4.29E-10 | 0.008569 |
| 11Nov2011 | 26886 | 1384.74 | 9.615872 | 1 K.FQNFAQI chr2@2226    | 1.59E-10 | 0.003264 |
| 11Nov2011 | 23034 | 804.91  | 25.79416 | 2 _._LTMTWN chr1@4515    | 1.22E-10 | 0.002574 |
| 11Nov2011 | 19547 | 599.28  | -28.7398 | 2 K.LCSTADT! chrX@1481   | 1.92E-10 | 0.003833 |
| 11Nov2011 | 941   | 722.35  | 3.723    | 1 R.FQGGGEI chr1@2595    | 3.38E-10 | 0.007043 |
| 11Nov2011 | 6285  | 741.39  | -17.2291 | 2 K.QKSNWH chr5@1229     | 2.89E-11 | 5.28E-04 |
| 11Nov2011 | 19426 | 852.9   | -9.81548 | 2 R.FQMQRNC chr1@1224    | 3.53E-10 | 0.007143 |
| 11Nov2011 | 21999 | 849.93  | 18.38221 | 2 Q.DSSYFVE Splice@chr   | 8.87E-12 | 0        |
| 11Nov2011 | 16885 | 893.98  | 23.35659 | 2 K.CTHLDKT chr5@2031    | 4.69E-10 | 0.00932  |

|           |       |         |          |                          |          |          |
|-----------|-------|---------|----------|--------------------------|----------|----------|
| 11Nov2011 | 11548 | 724.35  | 19.12636 | 3 V.CLTEEGK Splice@chr   | 1.70E-10 | 0.003668 |
| 11Nov2011 | 19733 | 685.88  | 4.188613 | 2 K.IVPGGGA chrX@1570    | 1.88E-17 | 0        |
| 11Nov2011 | 11572 | 1086.01 | 9.000639 | 2 V.CLTEEGK Splice@chr   | 1.64E-10 | 0.003443 |
| 11Nov2011 | 10225 | 1161.66 | -19.4191 | 1 K.NSKDKLV chr5@1250    | 2.87E-10 | 0.005696 |
| 11Nov2011 | 22051 | 849.92  | 6.583873 | 2 Q.DSSYFVE Splice@chr   | 1.58E-12 | 0        |
| 11Nov2011 | 2303  | 444.25  | -3.23598 | 2 R.AELSSRPI chr3@8104   | 4.02E-10 | 0.008256 |
| 11Nov2011 | 12648 | 746.36  | -23.1469 | 2 R.SYHYVAF Splice@chr   | 2.37E-10 | 0.004866 |
| 11Nov2011 | 28924 | 1211.58 | -14.5203 | 2 K.IRQWRRF Splice@chr   | 4.49E-10 | 0.008888 |
| 11Nov2011 | 29199 | 741.88  | -12.6527 | 2 K.KIFLQM+ chr2@1507    | 4.09E-10 | 0.008256 |
| 11Nov2011 | 17583 | 1000.57 | 4.002652 | 2 K.RNDLKGG Splice@chr   | 3.61E-10 | 0.007315 |
| 11Nov2011 | 23429 | 1356.81 | 7.112854 | 1 W.FLLLRQV Splice@chr   | 4.90E-10 | 0.009477 |
| 11Nov2011 | 18964 | 887.93  | 29.43791 | 2 I.DEREESTN chr5@9925   | 2.52E-10 | 0.005086 |
| 11Nov2011 | 31094 | 917.51  | 5.964791 | 2 _SIMSRLFI Splice@chr   | 5.05E-10 | 0.00974  |
| 11Nov2011 | 26672 | 1384.74 | 9.615872 | 1 K.FQNFAQI chr2@2226    | 4.63E-10 | 0.009163 |
| 11Nov2011 | 10645 | 566.31  | 21.45326 | 2 R.EVAQLEC chr5@1706    | 2.43E-10 | 0.004974 |
| 11Nov2011 | 31839 | 1147.25 | 13.44098 | 3 R.FQSAAIG Splice@chr   | 1.48E-13 | 0        |
| 11Nov2011 | 9456  | 868.42  | -0.63154 | 1 K.SSSGSLSS chr2@1132   | 2.42E-10 | 0.004974 |
| 11Nov2011 | 2818  | 888.52  | 29.02223 | 1 R.YNLHTLK Splice@chr   | 4.76E-10 | 0.00932  |
| 11Nov2011 | 11125 | 1086.01 | 9.000639 | 2 V.CLTEEGK Splice@chr   | 2.31E-12 | 0        |
| 11Nov2011 | 10834 | 1064.58 | -2.00842 | 1 K.YLINGNEI chr1@8687   | 8.40E-11 | 0.001749 |
| 11Nov2011 | 31680 | 1062.61 | 3.365979 | 2 E.EYFFRNL chrX@1001    | 4.41E-10 | 0.008839 |
| 11Nov2011 | 11495 | 975.55  | -13.0268 | 1 K.LPKLDAYI chr4@1149   | 1.27E-10 | 0.002632 |
| 11Nov2011 | 11496 | 724.35  | 19.12636 | 3 V.CLTEEGK Splice@chr   | 1.93E-12 | 0        |
| 11Nov2011 | 28465 | 914.48  | -9.75514 | 2 K.HRCHKN chr2@1129     | 3.25E-10 | 0.006709 |
| 11Nov2011 | 11510 | 1086.01 | 9.000639 | 2 V.CLTEEGK Splice@chr   | 3.84E-11 | 7.73E-04 |
| 11Nov2011 | 423   | 722.34  | -10.069  | 1 R.FQGGGEI chr1@2595    | 4.48E-10 | 0.008888 |
| 11Nov2011 | 5564  | 831.44  | -0.6597  | 1 K.NEGKTGF chr1@8724    | 5.05E-10 | 0.00974  |
| 11Nov2011 | 4017  | 928.48  | 5.067247 | 1 K.FRSHPER chr5@3821    | 3.71E-10 | 0.007771 |
| 11Nov2011 | 29689 | 980.55  | 4.33387  | 2 H.VLEAAV chr5@1975     | 3.35E-10 | 0.006871 |
| 11Nov2011 | 14514 | 587.3   | -11.6155 | 2 W.KNNTNL chr5@1300     | 4.61E-10 | 0.009051 |
| 11Nov2011 | 20150 | 664.7   | 1.197202 | 3 _PTLNK+1 chr1@6526     | 5.09E-11 | 8.96E-04 |
| 11Nov2011 | 26933 | 855.48  | -6.07153 | 2 K.IFTQTK+1 Splice@chr  | 2.43E-10 | 0.004974 |
| 11Nov2011 | 31065 | 917.51  | 5.964791 | 2 _SIMSRLFI Splice@chr   | 3.70E-10 | 0.007771 |
| 11Nov2011 | 28429 | 957.5   | 1.956888 | 3 R.FIEPIEDIF Splice@chr | 5.16E-10 | 0.009884 |
| 11Nov2011 | 7177  | 1107.56 | -21.6943 | 1 _SSLDKESC chr5@1239    | 1.78E-11 | 6.78E-05 |
| 11Nov2011 | 10780 | 1064.58 | -2.00842 | 1 K.YLINGNEI chr1@8687   | 1.66E-11 | 6.78E-05 |
| 11Nov2011 | 23658 | 1366.17 | -16.3461 | 2 K.TAQFTT Splice@chr    | 2.95E-10 | 0.005808 |
| 11Nov2011 | 22522 | 1110.04 | -27.8308 | 2 L.LHHHRVL Splice@chr   | 4.44E-10 | 0.008839 |
| 11Nov2011 | 12627 | 625.82  | -20.2839 | 2 R.K+14.016 chrX@1356   | 5.05E-10 | 0.00974  |
| 11Nov2011 | 10705 | 566.31  | 21.45326 | 2 R.EVAQLEC chr5@1706    | 4.44E-11 | 7.73E-04 |
| 11Nov2011 | 13058 | 565.83  | 14.11658 | 2 R.ISLTNANI chr5@7795   | 5.00E-10 | 0.00969  |
| 11Nov2011 | 737   | 552.8   | 7.143001 | 2 R.TQNATAI Splice@chr   | 2.23E-11 | 2.69E-04 |
| 11Nov2011 | 7496  | 546.78  | -19.0827 | 2 K.ETETGITC chr4@1221   | 4.07E-10 | 0.008256 |
| 11Nov2011 | 7036  | 519.6   | -26.5197 | 3 K.IGSM+15 chr5@1654    | 6.08E-11 | 0.00108  |
| 11Nov2011 | 22975 | 1275.6  | -25.4649 | 3 R.YSSECEP Splice@chr   | 1.76E-11 | 6.78E-05 |
| 11Nov2011 | 9930  | 1025.61 | -11.6755 | 1 K.LGLGSL chr5@4945     | 6.27E-12 | 0        |
| 11Nov2011 | 10414 | 559.79  | 11.35993 | 2 R.DGWSIG chr4@4255     | 6.74E-11 | 0.001324 |

|           |       |         |          |                          |          |          |
|-----------|-------|---------|----------|--------------------------|----------|----------|
| 11Nov2011 | 603   | 702.38  | 2.001521 | 1 _..DAAGLAC chr3@2528   | 1.02E-11 | 0        |
| 11Nov2011 | 23396 | 784.42  | -26.6807 | 3 _..LVK+14.0 Splice@chr | 2.20E-10 | 0.004346 |
| 11Nov2011 | 31376 | 850.45  | 9.125443 | 2 R.FSEVYRN Splice@chr   | 4.18E-10 | 0.00841  |
| 11Nov2011 | 19799 | 685.88  | 4.188613 | 2 K.IVPGGGA chrX@1570    | 2.27E-11 | 2.69E-04 |
| 11Nov2011 | 21043 | 515.29  | -6.17134 | 3 K.PNFTVILS chr4@1642   | 3.46E-10 | 0.007096 |
| 11Nov2011 | 765   | 552.8   | 7.143001 | 2 R.TQNATAI Splice@chr   | 4.80E-11 | 8.34E-04 |
| 11Nov2011 | 10894 | 1064.58 | -2.00842 | 1 K.YLINGNEI chr1@8687   | 1.22E-10 | 0.002514 |
| 11Nov2011 | 9876  | 1025.61 | -11.6755 | 1 K.LGLGSGL chr5@4945    | 3.57E-12 | 0        |
| 11Nov2011 | 18519 | 719.39  | 28.86707 | 2 R.FTQAGSE Splice@chr   | 4.67E-14 | 0        |
| 11Nov2011 | 25972 | 837.96  | -10.9805 | 2 R.NLRVK+1 chr1@2688    | 1.47E-10 | 0.002975 |
| 11Nov2011 | 24627 | 831.45  | -1.72693 | 2 R.NTRNQLF chrX@7297    | 2.16E-10 | 0.004346 |
| 11Nov2011 | 24917 | 895     | -10.9918 | 2 K.M+15.99 chrX@1449    | 6.94E-11 | 0.001324 |
| 11Nov2011 | 6336  | 741.38  | -23.1647 | 2 K.FPENRHLI chr2@1477   | 4.01E-10 | 0.008256 |
| 11Nov2011 | 26229 | 849.91  | -5.21446 | 2 Q.DSSYFVE Splice@chr   | 7.86E-11 | 0.001569 |
| 11Nov2011 | 26230 | 849.41  | -3.23735 | 2 Q.DSSYFVE Splice@chr   | 4.36E-10 | 0.008839 |
| 11Nov2011 | 20742 | 833.92  | -21.2254 | 2 _..IIEPYVAV Splice@chr | 4.14E-11 | 7.73E-04 |
| 11Nov2011 | 7443  | 546.78  | -19.0827 | 2 K.ETETGITC chr4@1221   | 4.58E-10 | 0.00894  |
| 11Nov2011 | 14255 | 1173.17 | -9.30319 | 3 K.PTMRTCC Splice@chr   | 3.74E-11 | 7.17E-04 |
| 11Nov2011 | 491   | 1000.59 | 27.93569 | 1 R.KNKEQQI Splice@chr   | 4.65E-10 | 0.009213 |
| 11Nov2011 | 492   | 890.47  | 3.986903 | 1 R.SSTLQPEI chr3@3247   | 4.49E-10 | 0.008888 |
| 11Nov2011 | 20709 | 774.96  | 16.29715 | 2 E.DILFVINK Splice@chr  | 2.81E-11 | 5.28E-04 |
| 11Nov2011 | 267   | 847.41  | 6.057386 | 1 R.EEAELEK. chr2@4805   | 2.33E-10 | 0.004753 |
| 11Nov2011 | 12687 | 625.82  | -20.2839 | 2 R.K+14.016 chrX@1356   | 3.19E-10 | 0.006597 |
| 11Nov2011 | 28413 | 914.48  | -9.75514 | 2 K.HRCHKN\ chr2@1129    | 1.05E-10 | 0.002159 |
| 11Nov2011 | 7330  | 463.77  | 1.18704  | 2 K.PVNIENLI chrX@1210   | 1.84E-10 | 0.003779 |
| 11Nov2011 | 753   | 556.31  | 12.70857 | 2 K.KNAEFFLI chr1@9699   | 4.94E-10 | 0.009528 |
| 11Nov2011 | 31726 | 1062.1  | 10.38858 | 2 R.QICPSRLI chr1@1061   | 2.11E-10 | 0.004236 |
| 11Nov2011 | 11564 | 1086.52 | 16.6803  | 2 V.CLTEEGK Splice@chr   | 3.83E-10 | 0.007935 |
| 11Nov2011 | 18572 | 719.38  | 14.92317 | 2 R.FTQAGSE Splice@chr   | 3.25E-13 | 0        |
| 11Nov2011 | 25939 | 993.21  | 7.733752 | 3 K.YEFKK+1+ chr4@5599   | 1.98E-11 | 2.02E-04 |
| 11Nov2011 | 369   | 722.35  | 3.723    | 1 R.FQGGGEI chr1@2595    | 3.42E-10 | 0.006384 |
| 11Nov2011 | 11202 | 1086.02 | 18.22629 | 2 V.CLTEEGK Splice@chr   | 5.76E-12 | 7.03E-05 |
| 11Nov2011 | 5771  | 433.76  | 2.609238 | 2 _..IVDLPGPI chr3@1104  | 1.29E-10 | 0.002834 |
| 11Nov2011 | 31585 | 1147.25 | 13.44098 | 3 R.FQSAAIG Splice@chr   | 2.28E-14 | 0        |
| 11Nov2011 | 29028 | 741.88  | -12.6527 | 2 K.KIFLQM+ chr2@1507    | 5.16E-10 | 0.009352 |
| 11Nov2011 | 23978 | 969.01  | -11.2595 | 2 Y.QRHVFNI Splice@chr   | 5.12E-10 | 0.009131 |
| 11Nov2011 | 6503  | 741.38  | -23.1647 | 2 K.FPENRHLI chr2@1477   | 8.12E-11 | 0.001831 |
| 11Nov2011 | 12698 | 625.82  | -20.2839 | 2 R.K+14.016 chrX@1356   | 4.26E-10 | 0.007871 |
| 11Nov2011 | 11279 | 821.44  | 15.92055 | 1 K.TGFGING chrX@2647    | 3.83E-10 | 0.007334 |
| 11Nov2011 | 10885 | 1064.58 | -2.00842 | 1 K.YLINGNEI chr1@8687   | 8.43E-11 | 0.002013 |
| 11Nov2011 | 23571 | 853.45  | -23.3178 | 2 K.NFKINSKI chr4@5819   | 2.16E-10 | 0.004202 |
| 11Nov2011 | 686   | 552.3   | 10.18569 | 2 R.TQNATAI Splice@chr   | 7.91E-11 | 0.001771 |
| 11Nov2011 | 23512 | 1366.17 | -16.3461 | 2 K.TAQTTFTT Splice@chr  | 4.53E-10 | 0.008307 |
| 11Nov2011 | 17155 | 717.89  | 18.98652 | 2 R.LNIAMN\ Splice@chr   | 2.55E-10 | 0.005116 |
| 11Nov2011 | 30026 | 1027.59 | -24.0001 | 2 I.KNELKSKA chrX@6127   | 3.82E-10 | 0.007334 |
| 11Nov2011 | 9060  | 493.78  | -11.3951 | 2 R.KNQENLI Splice@chr   | 5.40E-10 | 0.009449 |
| 11Nov2011 | 14270 | 1173.17 | -9.30319 | 3 K.PTMRTCC Splice@chr   | 1.39E-10 | 0.003062 |

|           |       |         |          |                         |          |          |
|-----------|-------|---------|----------|-------------------------|----------|----------|
| 11Nov2011 | 17241 | 1090.64 | 2.300686 | 1 L.SLIILAM+ Splice@chr | 5.55E-10 | 0.009776 |
| 11Nov2011 | 18760 | 623.03  | -18.2266 | 3 P.RNWGKG chrX@1446    | 3.03E-10 | 0.00589  |
| 11Nov2011 | 24460 | 521.3   | 24.95499 | 2 R.NLNEVEII chr4@1305  | 3.82E-10 | 0.007334 |
| 11Nov2011 | 8774  | 434.24  | 13.9946  | 3 _RSNDQTI chr5@6378    | 1.70E-10 | 0.003585 |
| 11Nov2011 | 30861 | 917.51  | 5.964791 | 2 _SIMSRLEI Splice@chr  | 4.55E-10 | 0.008307 |
| 11Nov2011 | 10769 | 566.31  | 21.45326 | 2 R.EVAQLEC chr5@1706   | 8.25E-11 | 0.001831 |
| 11Nov2011 | 20631 | 990.49  | -21.8765 | 2 F.RLSESELE chr4@7519  | 3.85E-10 | 0.007334 |
| 11Nov2011 | 19572 | 685.88  | 4.188613 | 2 K.IVPGGGA chrX@1570   | 1.63E-16 | 0        |
| 11Nov2011 | 10986 | 1063.58 | 1.14882  | 1 K.YLINGNEI chr1@8687  | 5.42E-10 | 0.009503 |
| 11Nov2011 | 28200 | 914.48  | -9.75514 | 2 K.HRCHKNI chr2@1129   | 6.41E-12 | 7.03E-05 |
| 11Nov2011 | 24786 | 1216.58 | -19.8654 | 2 L.RNTRNDI chr4@1012   | 4.08E-10 | 0.007536 |
| 11Nov2011 | 19986 | 664.7   | 1.197202 | 3 _PTLNK+1. chr1@6526   | 5.56E-10 | 0.009829 |
| 11Nov2011 | 22727 | 1275.6  | -25.4649 | 3 R.YSSECPEI Splice@chr | 5.17E-11 | 0.001161 |
| 11Nov2011 | 31187 | 850.45  | 9.125443 | 2 R.FSEVYRN Splice@chr  | 5.43E-10 | 0.009503 |
| 11Nov2011 | 17940 | 894.41  | 13.57006 | 2 _FSDDDVT Splice@chr   | 3.09E-11 | 4.66E-04 |
| 11Nov2011 | 21873 | 849.93  | 18.38221 | 2 Q.DSSYFVE Splice@chr  | 6.16E-12 | 7.03E-05 |
| 11Nov2011 | 6707  | 936.48  | 27.86052 | 1 K.LNGGYEC chr2@1191   | 4.04E-11 | 7.17E-04 |
| 11Nov2011 | 11295 | 560.81  | 10.68504 | 2 R.PDFSLNS chr3@3320   | 2.69E-10 | 0.005212 |
| 11Nov2011 | 13066 | 565.83  | 14.11658 | 2 R.ISLTNANI chr5@7793  | 3.83E-10 | 0.007334 |
| 11Nov2011 | 713   | 552.3   | 10.18569 | 2 R.TQNATAI Splice@chr  | 3.13E-10 | 0.005947 |
| 11Nov2011 | 7396  | 463.77  | 1.18704  | 2 K.PVNIENLI chrX@1210  | 1.26E-10 | 0.002774 |
| 11Nov2011 | 10410 | 507.78  | 21.88395 | 2 Q.DPVEDGI Splice@chr  | 1.60E-10 | 0.003352 |
| 11Nov2011 | 14592 | 1345.63 | -24.7692 | 2 _QVREMH Splice@chr    | 3.00E-10 | 0.005723 |
| 11Nov2011 | 7577  | 546.78  | -19.0827 | 2 K.ETETGITC chr4@1221  | 4.37E-11 | 7.81E-04 |
| 11Nov2011 | 30630 | 980.48  | -7.04314 | 3 K.SGTIFDNI Splice@chr | 9.09E-11 | 0.002133 |
| 11Nov2011 | 10498 | 1090.66 | -23.0402 | 1 K.KLKSMKN chr5@3701   | 1.89E-10 | 0.00381  |
| 11Nov2011 | 11000 | 1064.58 | -2.00842 | 1 K.YLINGNEI chr1@8687  | 5.24E-11 | 0.001161 |
| 11Nov2011 | 23449 | 1366.17 | -16.3461 | 2 K.TAQTTFT Splice@chr  | 1.55E-10 | 0.003297 |
| 11Nov2011 | 23179 | 784.42  | -26.6807 | 3 _LVK+14.0 Splice@chr  | 4.81E-11 | 9.71E-04 |
| 11Nov2011 | 18377 | 719.39  | 28.86707 | 2 R.FTQAGSE Splice@chr  | 1.12E-13 | 0        |
| 11Nov2011 | 12652 | 765.38  | -12.3766 | 1 R.SPEHAPK chr5@4294   | 6.91E-11 | 0.001651 |
| 11Nov2011 | 7182  | 519.6   | -26.5197 | 3 K.IGSM+15 chr5@1654   | 1.19E-11 | 1.37E-04 |
| 11Nov2011 | 3252  | 439.74  | 18.7116  | 2 R.SIAMFGP chr2@4157   | 2.00E-11 | 2.04E-04 |
| 11Nov2011 | 26723 | 1385.75 | 14.42536 | 1 K.FQNFAQI chr2@2226   | 8.71E-11 | 0.002013 |
| 11Nov2011 | 22856 | 804.91  | 25.79416 | 2 _LTMTWN chr1@4513     | 4.91E-10 | 0.008688 |
| 11Nov2011 | 721   | 556.31  | 12.70857 | 2 K.KNAEFFLI chr1@9699  | 3.91E-10 | 0.007442 |
| 11Nov2011 | 26685 | 855.48  | -6.07153 | 2 K.IFTQTK+1 Splice@chr | 2.97E-10 | 0.005723 |
| 11Nov2011 | 10072 | 570.3   | -4.34403 | 2 R.LPFFENI chr4@3451   | 8.09E-11 | 0.001831 |
| 11Nov2011 | 4687  | 972.55  | -25.2781 | 1 R.QMGKLP chr1@1111    | 3.32E-10 | 0.006155 |
| 11Nov2011 | 6455  | 741.39  | -17.2291 | 2 K.QKSNWH chr5@1229    | 2.20E-11 | 2.04E-04 |
| 11Nov2011 | 18321 | 719.39  | 28.86707 | 2 R.FTQAGSE Splice@chr  | 2.33E-13 | 0        |
| 11Nov2011 | 5260  | 848.47  | 21.53477 | 1 R.FALSDPA Splice@chr  | 5.19E-10 | 0.009352 |
| 11Nov2011 | 11595 | 724.35  | 19.12636 | 3 V.CLTEEGK Splice@chr  | 3.06E-12 | 0        |
| 11Nov2011 | 11596 | 1086.02 | 18.22629 | 2 V.CLTEEGK Splice@chr  | 6.73E-11 | 0.001651 |
| 11Nov2011 | 16573 | 671.37  | -24.0361 | 2 T.FNIVHTQ Splice@chr  | 3.62E-10 | 0.006714 |
| 11Nov2011 | 28419 | 876.99  | -11.1881 | 2 V.FPCK+14 chrX@2447   | 2.35E-10 | 0.00454  |
| 11Nov2011 | 19348 | 599.28  | -28.7398 | 2 K.LCSTADT chrX@1481   | 1.10E-10 | 0.002421 |

|           |       |         |          |                         |          |          |
|-----------|-------|---------|----------|-------------------------|----------|----------|
| 11Nov2011 | 17580 | 924.41  | -11.8314 | 2 Q.KPDDISN Splice@chr  | 5.40E-10 | 0.009449 |
| 11Nov2011 | 12357 | 573.3   | 15.53336 | 2 K.NIKVGDC chr2@1306   | 6.14E-11 | 0.001345 |
| 11Nov2011 | 5157  | 832.46  | 3.817225 | 1 _.FIDVPNK. Splice@chr | 5.08E-10 | 0.00902  |
| 11Nov2011 | 26524 | 1384.74 | 9.615872 | 1 K.FQNFAQI chr2@2226   | 5.00E-10 | 0.008966 |
| 11Nov2011 | 7454  | 463.77  | 1.18704  | 2 K.PVNIENLI chrX@1210  | 1.49E-10 | 0.003182 |
| 11Nov2011 | 11142 | 624.33  | 9.752617 | 2 R.QHAYAVI chrX@1402   | 4.77E-10 | 0.008468 |
| 11Nov2011 | 16328 | 671.37  | -24.0361 | 2 T.FNIVHTQ Splice@chr  | 4.03E-10 | 0.007536 |
| 11Nov2011 | 7273  | 553.78  | -10.2208 | 2 R.TASQK+1 chrX@5438   | 5.47E-10 | 0.009612 |
| 11Nov2011 | 20797 | 1090.53 | -18.1295 | 2 K.INGVTVA chr3@6296   | 2.31E-10 | 0.004427 |
| 11Nov2011 | 12775 | 765.38  | -12.3766 | 1 R.SPEHAPK chr5@4294   | 1.98E-10 | 0.00392  |
| 11Nov2011 | 30510 | 1000.51 | -15.4866 | 2 E.CLVVNLS Splice@chr  | 1.81E-10 | 0.003753 |
| 11Nov2011 | 29677 | 791.9   | -17.5179 | 4 K.SGTIFDNI Splice@chr | 4.89E-18 | 0        |
| 11Nov2011 | 25660 | 886.77  | -29.5706 | 3 G.FLFKSLC\ chr2@9496  | 3.21E-10 | 0.006051 |
| 11Nov2011 | 10537 | 559.79  | 11.35993 | 2 R.DGWSIGI chr4@4253   | 6.27E-11 | 0.001345 |
| 11Nov2011 | 14529 | 1345.63 | -24.7692 | 2 _.QVREMH Splice@chr   | 5.56E-10 | 0.009776 |
| 11Nov2011 | 5715  | 433.76  | 2.609238 | 2 _.IVDLP GPI chr3@1104 | 1.02E-10 | 0.002302 |
| 11Nov2011 | 26021 | 849.41  | -3.23735 | 2 Q.DSSYFVE Splice@chr  | 2.70E-10 | 0.005212 |
| 11Nov2011 | 548   | 702.38  | 2.001521 | 1 _.DAAGLAC chr3@2528   | 1.29E-11 | 1.37E-04 |
| 11Nov2011 | 12177 | 573.3   | 15.53336 | 2 K.NIKVGDC chr2@1306   | 1.13E-10 | 0.002479 |
| 11Nov2011 | 11192 | 724.35  | 19.12636 | 3 V.CLTEEGK Splice@chr  | 7.94E-12 | 7.03E-05 |
| 11Nov2011 | 18442 | 719.39  | 28.86707 | 2 R.FTQAGSE Splice@chr  | 3.23E-12 | 0        |
| 11Nov2011 | 6154  | 876.41  | -8.50606 | 1 K.TEDEARR chrX@1138   | 4.26E-11 | 7.17E-04 |
| 11Nov2011 | 10407 | 739.4   | 18.15789 | 2 K.M+15.99 chr5@5476   | 5.16E-10 | 0.009352 |
| 11Nov2011 | 24450 | 831.45  | -14.4052 | 2 K.PM+15.9 chr3@1124   | 3.16E-10 | 0.005998 |
| 11Nov2011 | 31351 | 1123.26 | -4.9137  | 3 R.REGVLNF Splice@chr  | 3.64E-10 | 0.006944 |
| 11Nov2011 | 20741 | 1090.53 | -18.1295 | 2 K.INGVTVA chr3@6296   | 9.39E-11 | 0.002188 |
| 11Nov2011 | 27310 | 1024.52 | -27.8903 | 2 F.K+14.016 chr4@8225  | 4.95E-10 | 0.008796 |
| 11Nov2011 | 24843 | 1216.59 | -11.6275 | 2 L.RNTRNDI chr4@1012   | 5.33E-10 | 0.009449 |
| 11Nov2011 | 17721 | 556.35  | 22.82847 | 2 K.NKQIPNV chr3@6739   | 1.81E-10 | 0.003753 |
| 11Nov2011 | 16452 | 671.37  | -24.0361 | 2 T.FNIVHTQ Splice@chr  | 3.55E-10 | 0.006598 |
| 11Nov2011 | 10938 | 1064.58 | -2.00842 | 1 K.YLINGNEI chr1@8687  | 4.80E-11 | 9.71E-04 |
| 11Nov2011 | 8398  | 505.93  | 21.00865 | 3 K.DAGFDPI chr1@3577   | 3.04E-10 | 0.00589  |
| 11Nov2011 | 12643 | 746.36  | -23.1469 | 2 R.SYHYVAF Splice@chr  | 2.07E-10 | 0.004092 |
| 11Nov2011 | 10876 | 1063.58 | 1.14882  | 1 K.YLINGNEI chr1@8687  | 4.05E-11 | 7.17E-04 |
| 11Nov2011 | 28992 | 741.88  | -12.6527 | 2 K.KIFLQM+ chr2@1507   | 3.12E-10 | 0.00589  |
| 11Nov2011 | 30952 | 929.16  | -18.1332 | 3 R.KSTAKLK\ chr2@8593  | 5.72E-11 | 0.001284 |
| 11Nov2011 | 19034 | 687.41  | 21.43028 | 2 E.M+15.99 chr2@8546   | 2.48E-10 | 0.004887 |
| 11Nov2011 | 10255 | 868.42  | -0.63154 | 1 K.SSSGSLSS chr2@1132  | 4.15E-10 | 0.008772 |
| 11Nov2011 | 15187 | 505.58  | -23.7891 | 3 K.LSSDDFV\ chr1@3182  | 5.05E-11 | 0.001229 |
| 11Nov2011 | 28582 | 1384.74 | 9.615872 | 1 K.FQNFAQI chr2@2226   | 3.43E-10 | 0.007261 |
| 11Nov2011 | 18973 | 894.4   | 2.427875 | 2 _.FSDDDVT Splice@chr  | 4.52E-12 | 6.55E-05 |
| 11Nov2011 | 3329  | 801.45  | 3.812604 | 1 R.IEAGGGC chr5@8776   | 2.48E-10 | 0.005643 |
| 11Nov2011 | 19438 | 719.38  | 14.92317 | 2 R.FTQAGSE Splice@chr  | 2.10E-13 | 6.55E-05 |
| 11Nov2011 | 7149  | 937.48  | 24.27422 | 1 K.LNGGYEC chr2@1191   | 3.51E-11 | 8.35E-04 |
| 11Nov2011 | 21638 | 833.92  | -21.2254 | 2 _.IIEPYVAV Splice@chr | 3.74E-12 | 6.55E-05 |
| 11Nov2011 | 21631 | 774.96  | 16.29715 | 2 E.DILFVINK Splice@chr | 1.52E-11 | 3.73E-04 |
| 11Nov2011 | 23089 | 849.92  | 6.583873 | 2 Q.DSSYFVE Splice@chr  | 1.15E-11 | 2.50E-04 |

|           |       |         |          |                          |          |          |
|-----------|-------|---------|----------|--------------------------|----------|----------|
| 11Nov2011 | 623   | 702.38  | 2.001521 | 1 _ .DAAGLAC chr3@2528   | 5.12E-12 | 6.55E-05 |
| 11Nov2011 | 5960  | 756.43  | -9.04908 | 1 R.PLSAAAA chr5@3132    | 3.69E-10 | 0.007921 |
| 11Nov2011 | 31708 | 968.46  | 13.6538  | 3 _ .GCSIVPIS Splice@chr | 2.07E-11 | 6.12E-04 |
| 11Nov2011 | 28294 | 1003.18 | 7.145987 | 3 R.CWNRRA Splice@chr    | 1.31E-12 | 6.55E-05 |
| 11Nov2011 | 16186 | 943.57  | -2.9787  | 1 _ .SPLFVPKf chrX@4402  | 1.30E-10 | 0.002943 |
| 11Nov2011 | 23244 | 656.36  | -18.1296 | 3 R.PEKLIEM- chr3@1258   | 1.72E-10 | 0.003789 |
| 11Nov2011 | 30085 | 980.05  | -22.3594 | 2 K.K+14.016 chrX@3807   | 4.78E-10 | 0.009491 |
| 11Nov2011 | 21573 | 774.96  | 16.29715 | 2 E.DILFVINK Splice@chr  | 9.70E-12 | 1.90E-04 |
| 11Nov2011 | 30787 | 862.95  | 16.89984 | 2 K.HVLQNDI chr5@1781    | 2.30E-10 | 0.005457 |
| 11Nov2011 | 21776 | 777.91  | 29.12834 | 2 C.TCLERYL chrX@1535    | 2.93E-10 | 0.006502 |
| 11Nov2011 | 18418 | 893.91  | 15.44868 | 2 _ .FSDDDVT Splice@chr  | 4.25E-10 | 0.008913 |
| 11Nov2011 | 27911 | 889.93  | 5.492988 | 2 K.GWSVPLI Splice@chr   | 4.75E-10 | 0.009491 |
| 11Nov2011 | 18497 | 1289.2  | -19.8826 | 2 K.TKKQKKK chrX@6244    | 5.11E-10 | 0.009984 |
| 11Nov2011 | 7020  | 936.48  | 27.86052 | 1 K.LNGGYEC chr2@1191    | 3.99E-11 | 0.001004 |
| 11Nov2011 | 27086 | 1133.58 | -15.1469 | 3 K.HQLVSAF Splice@chr   | 1.09E-13 | 0        |
| 11Nov2011 | 12215 | 862.47  | 2.904885 | 1 _ .PIQDVYK Splice@chr  | 3.61E-10 | 0.007616 |
| 11Nov2011 | 1263  | 632.78  | -25.4076 | 2 _ .KM+15.9 Splice@chr  | 4.40E-10 | 0.009057 |
| 11Nov2011 | 6894  | 741.38  | -23.1647 | 2 K.FPENRHL chr2@1477    | 1.21E-10 | 0.002685 |
| 11Nov2011 | 12080 | 700.91  | 19.76809 | 2 K.K+14.016 chr3@1076   | 4.24E-10 | 0.008913 |
| 11Nov2011 | 10880 | 848.47  | -0.50415 | 1 R.VPLFMNI Splice@chr   | 2.66E-10 | 0.005844 |
| 11Nov2011 | 7856  | 463.77  | 1.18704  | 2 K.PVNIENLI chrX@1210   | 2.19E-10 | 0.005091 |
| 11Nov2011 | 34486 | 781.15  | -10.1536 | 4 R.KQEKLGf chr1@3430    | 2.67E-11 | 6.65E-04 |
| 11Nov2011 | 26963 | 1133.59 | -6.23448 | 3 K.HQLVSAF Splice@chr   | 3.30E-15 | 0        |
| 11Nov2011 | 16500 | 662.86  | 7.984656 | 2 S.INM+15.5 chr4@2551   | 3.91E-10 | 0.008272 |
| 11Nov2011 | 31860 | 954.46  | 24.98958 | 4 K.FAVADEE Splice@chr   | 2.81E-10 | 0.006203 |
| 11Nov2011 | 6465  | 1274.07 | 6.16406  | 2 L.EDESAAV Splice@chr   | 4.37E-10 | 0.009057 |
| 11Nov2011 | 31837 | 1272.28 | 27.03865 | 3 K.FAVADEE Splice@chr   | 2.41E-14 | 0        |
| 11Nov2011 | 30870 | 741.88  | -12.6527 | 2 K.KIFLQM+ chr2@1507    | 2.39E-10 | 0.005603 |
| 11Nov2011 | 34773 | 963.12  | 4.929555 | 3 _ .GCSIVPIS Splice@chr | 9.28E-11 | 0.001989 |
| 11Nov2011 | 15127 | 505.58  | -23.7891 | 3 K.LSSDDFV chr1@3182    | 9.47E-11 | 0.002099 |
| 11Nov2011 | 21756 | 990.49  | -21.8765 | 2 F.RLSESELE chr4@7519   | 3.13E-10 | 0.006758 |
| 11Nov2011 | 10667 | 1025.61 | -11.6755 | 1 K.LGLGSGL chr5@4945    | 7.63E-12 | 1.28E-04 |
| 11Nov2011 | 7074  | 936.48  | 27.86052 | 1 K.LNGGYEC chr2@1191    | 4.27E-11 | 0.001058 |
| 11Nov2011 | 32964 | 909.44  | -15.8299 | 2 K.KCNEEGC chr3@1174    | 3.49E-10 | 0.007363 |
| 11Nov2011 | 20115 | 687.41  | 21.43028 | 2 E.M+15.99 chr2@8546    | 2.66E-10 | 0.005894 |
| 11Nov2011 | 18620 | 1289.2  | -19.8826 | 2 K.TKKQKKK chrX@6244    | 5.74E-11 | 0.001396 |
| 11Nov2011 | 11463 | 1063.58 | 1.14882  | 1 K.YLINGNEI chr1@8687   | 1.12E-10 | 0.002246 |
| 11Nov2011 | 19031 | 894.4   | 2.427875 | 2 _ .FSDDDVT Splice@chr  | 5.37E-12 | 6.55E-05 |
| 11Nov2011 | 20283 | 833.93  | -9.2006  | 2 _ .IIEPYVAV Splice@chr | 2.70E-10 | 0.005941 |
| 11Nov2011 | 19921 | 687.41  | 21.43028 | 2 E.M+15.99 chr2@8546    | 1.50E-10 | 0.003318 |
| 11Nov2011 | 24476 | 1356.81 | 7.112854 | 1 W.FLLLRQV Splice@chr   | 4.79E-10 | 0.009538 |
| 11Nov2011 | 28037 | 1385.74 | 7.1914   | 1 K.FQNFAQI chr2@2226    | 1.50E-10 | 0.003318 |
| 11Nov2011 | 7134  | 936.48  | 27.86052 | 1 K.LNGGYEC chr2@1191    | 3.81E-11 | 9.50E-04 |
| 11Nov2011 | 7825  | 1107.56 | -21.6943 | 1 _ .SSLDKESC chr5@1239  | 8.03E-11 | 0.001715 |
| 11Nov2011 | 24586 | 1356.81 | 7.112854 | 1 W.FLLLRQV Splice@chr   | 4.60E-10 | 0.0093   |
| 11Nov2011 | 7512  | 626.3   | -9.76097 | 2 R.LCESGAA Splice@chr   | 1.02E-15 | 0        |
| 11Nov2011 | 27198 | 1133.59 | -6.23448 | 3 K.HQLVSAF Splice@chr   | 1.29E-13 | 6.55E-05 |

|           |       |         |          |                          |          |          |
|-----------|-------|---------|----------|--------------------------|----------|----------|
| 11Nov2011 | 12103 | 862.47  | 2.904885 | 1 _..PIQDVYK Splice@chr  | 2.20E-10 | 0.005091 |
| 11Nov2011 | 24506 | 784.42  | -26.6807 | 3 _..LVK+14.0 Splice@chr | 2.91E-10 | 0.006408 |
| 11Nov2011 | 19385 | 719.38  | 14.92317 | 2 R.FTQAGSE Splice@chr   | 2.14E-13 | 6.55E-05 |
| 11Nov2011 | 12653 | 472.76  | -28.4627 | 4 K.KWLGRM chr5@1090     | 2.66E-10 | 0.005894 |
| 11Nov2011 | 18476 | 893.91  | 15.44868 | 2 _..FDSDDTV Splice@chr  | 1.80E-10 | 0.004056 |
| 11Nov2011 | 19259 | 894.41  | 13.57006 | 2 _..FDSDDTV Splice@chr  | 3.38E-11 | 8.35E-04 |
| 11Nov2011 | 30028 | 957.5   | 1.956888 | 3 R.FIEPIEDIF Splice@chr | 2.28E-10 | 0.005408 |
| 11Nov2011 | 20660 | 685.88  | 4.188613 | 2 K.IVPGGGA chrX@1570    | 2.37E-15 | 0        |
| 11Nov2011 | 21040 | 664.7   | 1.197202 | 3 _..PTLNK+1 chr1@6526   | 9.17E-11 | 0.001989 |
| 11Nov2011 | 15721 | 1173.49 | -21.7126 | 3 K.PTMRTCC Splice@chr   | 4.61E-14 | 0        |
| 11Nov2011 | 10963 | 739.4   | 18.15789 | 2 K.M+15.99 chr5@5476    | 5.06E-10 | 0.009984 |
| 11Nov2011 | 10959 | 1089.65 | -29.1532 | 1 K.KLKSMKN chr5@3701    | 3.99E-10 | 0.008475 |
| 11Nov2011 | 5744  | 451.27  | 14.8624  | 2 K.IEVDGVL chrX@1251    | 3.07E-10 | 0.006658 |
| 11Nov2011 | 10902 | 1089.65 | -29.1532 | 1 K.KLKSMKN chr5@3701    | 1.22E-10 | 0.002685 |
| 11Nov2011 | 9360  | 434.24  | 13.9946  | 3 _..RSNDQTI chr5@6378   | 2.79E-10 | 0.006203 |
| 11Nov2011 | 21097 | 664.7   | 1.197202 | 3 _..PTLNK+1 chr1@6526   | 3.49E-10 | 0.007312 |
| 11Nov2011 | 12329 | 1086.01 | 9.000639 | 2 V.CLTEEGK Splice@chr   | 4.96E-11 | 0.001229 |
| 11Nov2011 | 12270 | 1086.01 | 9.000639 | 2 V.CLTEEGK Splice@chr   | 7.18E-11 | 0.001553 |
| 11Nov2011 | 8051  | 546.78  | -19.0827 | 2 K.ETETGITC chr4@1221   | 3.03E-10 | 0.006658 |
| 11Nov2011 | 28197 | 1384.74 | 9.615872 | 1 K.FQNFQAI chr2@2226    | 2.90E-10 | 0.006355 |
| 11Nov2011 | 34209 | 1133.61 | 11.44664 | 3 K.HQLVSAF Splice@chr   | 3.56E-10 | 0.007519 |
| 11Nov2011 | 29661 | 1135.56 | 14.02138 | 2 _..DMDYAFI Splice@chr  | 4.96E-10 | 0.009938 |
| 11Nov2011 | 27884 | 890.44  | 14.86661 | 2 K.GWSVPLI Splice@chr   | 3.06E-12 | 6.55E-05 |
| 11Nov2011 | 27144 | 1133.59 | -6.23448 | 3 K.HQLVSAF Splice@chr   | 2.25E-13 | 6.55E-05 |
| 11Nov2011 | 18763 | 893.91  | 15.44868 | 2 _..FDSDDTV Splice@chr  | 2.74E-10 | 0.005941 |
| 11Nov2011 | 33314 | 822.43  | 27.34471 | 2 Q.M+15.99 Splice@chr   | 2.15E-10 | 0.004933 |
| 11Nov2011 | 430   | 845.47  | 16.40714 | 1 R.FAVYFAK chr1@8163    | 4.30E-10 | 0.008964 |
| 11Nov2011 | 12159 | 862.47  | 2.904885 | 1 _..PIQDVYK Splice@chr  | 2.16E-10 | 0.004985 |
| 11Nov2011 | 11532 | 1064.58 | -2.00842 | 1 K.YLINGNEI chr1@8687   | 7.26E-11 | 0.001553 |
| 11Nov2011 | 26068 | 732.07  | 19.51873 | 3 R.ATDDWII Splice@chr   | 4.51E-10 | 0.009207 |
| 11Nov2011 | 31660 | 968.13  | 18.26018 | 3 _..GCSIVPIS Splice@chr | 3.85E-11 | 9.50E-04 |
| 11Nov2011 | 14998 | 1173.5  | -13.1731 | 3 K.PTMRTCC Splice@chr   | 1.81E-12 | 6.55E-05 |
| 11Nov2011 | 34675 | 860.68  | 2.433027 | 4 R.FQSAAIG Splice@chr   | 1.28E-12 | 6.55E-05 |
| 11Nov2011 | 10847 | 1089.65 | -29.1532 | 1 K.KLKSMKN chr5@3701    | 1.62E-10 | 0.003635 |
| 11Nov2011 | 19501 | 719.38  | 14.92317 | 2 R.FTQAGSE Splice@chr   | 1.52E-12 | 6.55E-05 |
| 11Nov2011 | 14174 | 1173.5  | -13.1731 | 3 K.PTMRTCC Splice@chr   | 7.52E-13 | 6.55E-05 |
| 11Nov2011 | 11473 | 1064.58 | -2.00842 | 1 K.YLINGNEI chr1@8687   | 7.17E-11 | 0.001553 |
| 11Nov2011 | 19201 | 894.4   | 2.427875 | 2 _..FDSDDTV Splice@chr  | 2.23E-12 | 6.55E-05 |
| 11Nov2011 | 20600 | 685.88  | 4.188613 | 2 K.IVPGGGA chrX@1570    | 1.88E-17 | 0        |
| 11Nov2011 | 8164  | 546.78  | -19.0827 | 2 K.ETETGITC chr4@1221   | 1.69E-11 | 4.32E-04 |
| 11Nov2011 | 35583 | 934.52  | -27.2727 | 3 K.AKRMKKI chr1@6827    | 4.38E-10 | 0.009057 |
| 11Nov2011 | 28026 | 798.4   | -12.6137 | 4 K.SGDAGIV Splice@chr   | 1.52E-13 | 6.55E-05 |
| 11Nov2011 | 14948 | 1173.17 | -9.30319 | 3 K.PTMRTCC Splice@chr   | 1.44E-11 | 3.73E-04 |
| 11Nov2011 | 18712 | 1288.7  | -18.58   | 2 K.TKKQKKK chrX@6244    | 4.38E-10 | 0.009057 |
| 11Nov2011 | 28492 | 1384.74 | 9.615872 | 1 K.FQNFQAI chr2@2226    | 1.96E-10 | 0.004524 |
| 11Nov2011 | 6849  | 741.38  | -23.1647 | 2 K.FPENRHI chr2@1477    | 2.26E-10 | 0.005301 |
| 11Nov2011 | 3371  | 801.45  | 3.812604 | 1 R.IEAGGGC chr5@8776    | 2.50E-11 | 6.65E-04 |

|           |       |         |          |                          |          |          |
|-----------|-------|---------|----------|--------------------------|----------|----------|
| 11Nov2011 | 21854 | 1090.53 | -18.1295 | 2 K.INGVTVA chr3@6296    | 9.61E-11 | 0.002142 |
| 11Nov2011 | 11172 | 710.91  | -12.5168 | 2 R.TIAVWAV chr1@1292    | 4.52E-10 | 0.009207 |
| 11Nov2011 | 1299  | 632.78  | -25.4076 | 2 _ .KM+15.9 Splice@chr  | 4.01E-10 | 0.00852  |
| 11Nov2011 | 27419 | 849.41  | -3.23735 | 2 Q.DSSYFVE Splice@chr   | 1.00E-10 | 0.002142 |
| 11Nov2011 | 25824 | 831.45  | -14.4052 | 2 K.PM+15.9 chr3@1124    | 3.61E-10 | 0.007616 |
| 11Nov2011 | 14120 | 1173.16 | -17.9121 | 3 K.PTMRTCC Splice@chr   | 2.32E-10 | 0.005457 |
| 11Nov2011 | 7031  | 937.48  | 24.27422 | 1 K.LNGGYEC chr2@1191    | 3.90E-11 | 9.50E-04 |
| 11Nov2011 | 29570 | 1135.56 | 14.02138 | 2 _ .DMDYAF Splice@chr   | 1.91E-10 | 0.004313 |
| 11Nov2011 | 12066 | 975.55  | -13.0268 | 1 K.LPKLDAYI chr4@1149   | 1.56E-10 | 0.003585 |
| 11Nov2011 | 34683 | 1147.24 | 4.705638 | 3 R.FQSAAG Splice@chr    | 6.38E-14 | 0        |
| 11Nov2011 | 15942 | 1075.05 | -16.1169 | 2 R.TCSK+14. chr2@1255   | 2.55E-10 | 0.005643 |
| 11Nov2011 | 21828 | 777.91  | 29.12834 | 2 C.TCLERYLE chrX@1535   | 4.39E-10 | 0.009057 |
| 11Nov2011 | 11419 | 1064.58 | -2.00842 | 1 K.YLINGNEI chr1@8687   | 7.04E-11 | 0.001553 |
| 11Nov2011 | 19839 | 887.93  | 29.43791 | 2 I.DEREESTM Splice@chr  | 8.57E-11 | 0.00188  |
| 11Nov2011 | 3452  | 439.73  | -4.03447 | 2 R.SIAMFGP chr2@4157    | 1.13E-10 | 0.002246 |
| 11Nov2011 | 7084  | 937.48  | 24.27422 | 1 K.LNGGYEC chr2@1191    | 4.20E-11 | 0.001004 |
| 11Nov2011 | 15138 | 1173.16 | -17.9121 | 3 K.PTMRTCC Splice@chr   | 2.36E-11 | 6.65E-04 |
| 11Nov2011 | 32970 | 1000.5  | -25.5062 | 2 E.CLVVNLS Splice@chr   | 2.00E-10 | 0.004566 |
| 11Nov2011 | 27471 | 849.41  | -3.23735 | 2 Q.DSSYFVE Splice@chr   | 3.34E-11 | 8.35E-04 |
| 11Nov2011 | 33578 | 963.13  | 11.61408 | 3 _ .CSIRPISG Splice@chr | 3.15E-10 | 0.006758 |
| 11Nov2011 | 15077 | 1173.17 | -9.30319 | 3 K.PTMRTCC Splice@chr   | 2.00E-12 | 6.55E-05 |
| 11Nov2011 | 33631 | 929.15  | -28.8338 | 3 R.KSTAKLK chr2@8595    | 3.17E-10 | 0.006809 |
| 11Nov2011 | 31812 | 954.46  | 24.98958 | 4 K.FAVADEE Splice@chr   | 2.55E-12 | 6.55E-05 |
| 11Nov2011 | 5388  | 833.46  | -4.25508 | 1 R.DMVQLV chrX@9811     | 3.10E-10 | 0.00671  |
| 11Nov2011 | 31732 | 726.1   | -25.4204 | 4 _ .AVPFVPI Splice@chr  | 2.26E-10 | 0.005301 |
| 11Nov2011 | 11521 | 1063.58 | 1.14882  | 1 K.YLINGNEI chr1@8687   | 3.01E-10 | 0.006502 |
| 11Nov2011 | 33190 | 1288.15 | -28.1526 | 2 _ .CTAVSAS Splice@chr  | 1.23E-11 | 2.50E-04 |
| 11Nov2011 | 7504  | 626.8   | -12.4435 | 2 R.LCESGAA Splice@chr   | 6.94E-15 | 0        |
| 11Nov2011 | 29619 | 1135.56 | 14.02138 | 2 _ .DMDYAF Splice@chr   | 3.69E-11 | 8.92E-04 |
| 11Nov2011 | 19149 | 894.4   | 2.427875 | 2 _ .FSDDDVT Splice@chr  | 1.95E-12 | 6.55E-05 |
| 11Nov2011 | 18683 | 1289.2  | -19.8826 | 2 K.TKKQKKK chrX@6244    | 2.71E-10 | 0.005941 |
| 11Nov2011 | 27026 | 1133.58 | -15.1469 | 3 K.HQLVSAF Splice@chr   | 8.30E-14 | 0        |
| 11Nov2011 | 11118 | 710.9   | -26.5408 | 2 R.TIAVWAV chr1@1292    | 3.24E-10 | 0.006961 |
| 11Nov2011 | 15445 | 1345.63 | -24.7692 | 2 _ .QVREMH Splice@chr   | 4.96E-10 | 0.009043 |
| 11Nov2011 | 14213 | 1173.17 | -9.30319 | 3 K.PTMRTCC Splice@chr   | 7.64E-12 | 6.61E-05 |
| 11Nov2011 | 11684 | 1063.58 | 1.14882  | 1 K.YLINGNEI chr1@8687   | 3.51E-10 | 0.006636 |
| 11Nov2011 | 34243 | 962.8   | 19.96909 | 3 _ .GCSIVPIS Splice@chr | 4.46E-10 | 0.008232 |
| 11Nov2011 | 18524 | 894.41  | 13.57006 | 2 _ .FSDDDVT Splice@chr  | 4.71E-10 | 0.00869  |
| 11Nov2011 | 600   | 702.38  | 2.001521 | 1 _ .DAAGLAC chr3@2528   | 1.29E-11 | 1.94E-04 |
| 11Nov2011 | 34948 | 798.4   | 12.60083 | 2 K.VHLVYFN chr5@7770    | 5.45E-10 | 0.009897 |
| 11Nov2011 | 27968 | 890.44  | 14.86661 | 2 K.GWSVPLI Splice@chr   | 1.33E-11 | 1.94E-04 |
| 11Nov2011 | 13418 | 765.38  | -12.3766 | 1 R.SPEHAPK chr5@4294    | 4.02E-10 | 0.007569 |
| 11Nov2011 | 28589 | 1384.74 | 9.615872 | 1 K.FQNFQAI chr2@2226    | 1.28E-10 | 0.002371 |
| 11Nov2011 | 28139 | 1384.74 | 9.615872 | 1 K.FQNFQAI chr2@2226    | 5.59E-10 | 0.009995 |
| 11Nov2011 | 27267 | 890.45  | 26.12723 | 2 K.GWSVPLI Splice@chr   | 1.36E-10 | 0.002533 |
| 11Nov2011 | 20773 | 685.88  | 4.188613 | 2 K.IVPGGGA chrX@1570    | 1.38E-18 | 0        |
| 11Nov2011 | 18601 | 1289.2  | -19.8826 | 2 K.TKKQKKK chrX@6244    | 4.83E-10 | 0.008953 |

|           |       |         |          |                         |          |          |
|-----------|-------|---------|----------|-------------------------|----------|----------|
| 11Nov2011 | 32828 | 1000.51 | -15.4866 | 2 E.CLVVNLS Splice@chr  | 1.60E-10 | 0.003027 |
| 11Nov2011 | 7197  | 936.48  | 27.86052 | 1 K.LNGGYEC chr2@1191   | 2.27E-10 | 0.004259 |
| 11Nov2011 | 21790 | 774.96  | 16.29715 | 2 E.DILFVINK Splice@chr | 1.24E-11 | 1.94E-04 |
| 11Nov2011 | 15270 | 1173.5  | -13.1731 | 3 K.PTMRTCC Splice@chr  | 1.46E-11 | 2.55E-04 |
| 11Nov2011 | 19327 | 894.41  | 13.57006 | 2 _FDSDDTV Splice@chr   | 5.33E-12 | 6.61E-05 |
| 11Nov2011 | 10979 | 848.47  | -0.50415 | 1 R.VPLFMNI Splice@chr  | 2.66E-10 | 0.00528  |
| 11Nov2011 | 10216 | 868.42  | -0.63154 | 1 K.SSSGSLSS chr2@1132  | 3.08E-10 | 0.005788 |
| 11Nov2011 | 32123 | 1027.59 | -24.0001 | 2 I.KNELKSKA chrX@6127  | 1.58E-10 | 0.003027 |
| 11Nov2011 | 11510 | 1064.59 | 7.411911 | 1 K.YLINGNEI chr1@8687  | 2.70E-11 | 4.98E-04 |
| 11Nov2011 | 6393  | 685.38  | -12.3964 | 2 K.ISTQTHIC chr4@7638  | 4.03E-10 | 0.007569 |
| 11Nov2011 | 12408 | 800.49  | 2.290306 | 1 K.VEAAVAI Splice@chr  | 1.20E-10 | 0.002203 |
| 11Nov2011 | 27212 | 889.95  | 28.01424 | 2 K.GWSVPLI Splice@chr  | 3.00E-10 | 0.005688 |
| 11Nov2011 | 21486 | 1039.54 | -8.43655 | 2 K.YSPNLRA chr4@4065   | 2.17E-10 | 0.004151 |
| 11Nov2011 | 15073 | 1173.17 | -9.30319 | 3 K.PTMRTCC Splice@chr  | 4.43E-11 | 9.13E-04 |
| 11Nov2011 | 23680 | 1110.04 | -27.8308 | 2 L.LHHHRVL Splice@chr  | 1.04E-10 | 0.002037 |
| 11Nov2011 | 11622 | 1064.58 | -2.00842 | 1 K.YLINGNEI chr1@8687  | 1.71E-10 | 0.003302 |
| 11Nov2011 | 19475 | 719.39  | 28.86707 | 2 R.FTQAGSE Splice@chr  | 2.16E-13 | 0        |
| 11Nov2011 | 30881 | 741.88  | -12.6527 | 2 K.KIFLQM+ chr2@1507   | 2.92E-10 | 0.005589 |
| 11Nov2011 | 34652 | 921.46  | -23.319  | 2 P.SNIPK+14 chr2@1297  | 2.32E-10 | 0.004477 |
| 11Nov2011 | 7097  | 937.48  | 24.27422 | 1 K.LNGGYEC chr2@1191   | 4.00E-11 | 7.97E-04 |
| 11Nov2011 | 19115 | 894.41  | 13.57006 | 2 _FDSDDTV Splice@chr   | 9.10E-12 | 1.32E-04 |
| 11Nov2011 | 30565 | 1212.07 | -24.1744 | 2 K.IRQWRRR Splice@chr  | 3.43E-10 | 0.006421 |
| 11Nov2011 | 15901 | 1173.5  | -13.1731 | 3 K.PTMRTCC Splice@chr  | 3.18E-14 | 0        |
| 11Nov2011 | 3405  | 801.45  | 3.812604 | 1 R.IEAGGGC chr5@8776   | 1.42E-10 | 0.00264  |
| 11Nov2011 | 25905 | 831.45  | -1.72693 | 2 R.NTRNQLF chrX@7297   | 2.99E-10 | 0.005688 |
| 11Nov2011 | 992   | 403.23  | 10.8661  | 2 R.AMVASG chr5@1721    | 7.91E-12 | 6.61E-05 |
| 11Nov2011 | 7134  | 936.48  | 27.86052 | 1 K.LNGGYEC chr2@1191   | 2.64E-11 | 4.98E-04 |
| 11Nov2011 | 9395  | 434.24  | 13.9946  | 3 _RSNDQTI chr5@6378    | 1.58E-10 | 0.003027 |
| 11Nov2011 | 7892  | 1107.57 | -12.7508 | 1 _SSLKESC chr5@1239    | 3.02E-11 | 4.98E-04 |
| 11Nov2011 | 20143 | 687.41  | 21.43028 | 2 E.M+15.99 chr2@8546   | 1.65E-10 | 0.003079 |
| 11Nov2011 | 32337 | 959.52  | -27.8897 | 2 K.KSNFFRFI chr3@1331  | 4.51E-10 | 0.008389 |
| 11Nov2011 | 19973 | 887.93  | 29.43791 | 2 I.DEREESTM Splice@chr | 1.64E-10 | 0.003079 |
| 11Nov2011 | 7208  | 471.79  | -5.7044  | 2 K.IKVNFPPI chr2@3034  | 5.24E-10 | 0.009556 |
| 11Nov2011 | 1314  | 552.3   | -2.43568 | 2 K.EAEEEEKI chrX@5587  | 4.85E-10 | 0.008953 |
| 11Nov2011 | 21771 | 833.92  | -21.2254 | 2 _IIEPYVAV Splice@chr  | 8.58E-13 | 0        |
| 11Nov2011 | 34197 | 1147.25 | 13.44098 | 3 R.FQSAAIG Splice@chr  | 5.84E-14 | 0        |
| 11Nov2011 | 5499  | 832.46  | 3.817225 | 1 _FIDVPNK Splice@chr   | 5.29E-10 | 0.009603 |
| 11Nov2011 | 2050  | 632.78  | -25.4076 | 2 _KM+15.9 Splice@chr   | 2.05E-10 | 0.00383  |
| 11Nov2011 | 16314 | 944.58  | 4.081799 | 1 _SPLFVPKI chrX@4402   | 1.50E-10 | 0.00269  |
| 11Nov2011 | 11887 | 724.35  | 19.12636 | 3 V.CLTEEGK Splice@chr  | 5.34E-10 | 0.0097   |
| 11Nov2011 | 4207  | 418.89  | -10.5715 | 3 R.ENFATKC chr5@5231   | 4.61E-10 | 0.008488 |
| 11Nov2011 | 31812 | 954.46  | 24.98958 | 4 K.FAFADEE Splice@chr  | 8.81E-13 | 0        |
| 11Nov2011 | 3449  | 801.45  | 3.812604 | 1 R.IEAGGGC chr5@8776   | 2.70E-10 | 0.005333 |
| 11Nov2011 | 21978 | 1090.53 | -18.1295 | 2 K.INGVTVA chr3@6296   | 1.68E-10 | 0.003302 |
| 11Nov2011 | 34015 | 962.8   | 16.16136 | 3 _CSIRPISG Splice@chr  | 1.82E-10 | 0.003453 |
| 11Nov2011 | 35420 | 1129.08 | -6.57578 | 2 R.K+14.016 chr2@5339  | 1.37E-10 | 0.002533 |
| 11Nov2011 | 7550  | 626.3   | -9.76097 | 2 R.LCESGAA Splice@chr  | 6.90E-16 | 0        |

|           |       |         |          |                          |          |          |
|-----------|-------|---------|----------|--------------------------|----------|----------|
| 11Nov2011 | 7616  | 626.3   | -9.76097 | 2 R.LCESGAA Splice@chr   | 1.66E-15 | 0        |
| 11Nov2011 | 19268 | 894.41  | 13.57006 | 2 _._FSDDDVT Splice@chr  | 9.46E-13 | 0        |
| 11Nov2011 | 6505  | 1274.08 | 14.02996 | 2 L.EDESAAV Splice@chr   | 2.84E-10 | 0.005589 |
| 11Nov2011 | 29677 | 1135.06 | 15.50052 | 2 _._DMDYAF Splice@chr   | 1.62E-10 | 0.003079 |
| 11Nov2011 | 29997 | 957.5   | 1.956888 | 3 R.FIEPIEDIF Splice@chr | 2.79E-10 | 0.005493 |
| 11Nov2011 | 13211 | 1086.01 | 9.000639 | 2 V.CLTEEGK Splice@chr   | 6.87E-11 | 0.001484 |
| 11Nov2011 | 721   | 549.78  | -29.1391 | 2 R.RKDAGHI chrX@3850    | 9.52E-11 | 0.001871 |
| 11Nov2011 | 17249 | 671.37  | -24.0361 | 2 T.FNIVHTQ Splice@chr   | 2.71E-10 | 0.005333 |
| 11Nov2011 | 12231 | 975.55  | -13.0268 | 1 K.LPKLDAYI chr4@1149   | 1.91E-10 | 0.003505 |
| 11Nov2011 | 12234 | 862.47  | 2.904885 | 1 _._PIQDVYK Splice@chr  | 1.80E-10 | 0.003453 |
| 11Nov2011 | 28030 | 1385.75 | 14.42536 | 1 K.FQNFQAI chr2@2226    | 2.08E-10 | 0.00383  |
| 11Nov2011 | 28029 | 890.44  | 14.86661 | 2 K.GWSVPLI Splice@chr   | 2.80E-11 | 4.98E-04 |
| 11Nov2011 | 34235 | 1147.25 | 13.44098 | 3 R.FQSAAIG Splice@chr   | 2.55E-14 | 0        |
| 11Nov2011 | 28199 | 1385.75 | 14.42536 | 1 K.FQNFQAI chr2@2226    | 2.23E-10 | 0.004151 |
| 11Nov2011 | 19215 | 894.41  | 13.57006 | 2 _._FSDDDVT Splice@chr  | 2.59E-13 | 0        |
| 11Nov2011 | 18978 | 894.41  | 13.57006 | 2 _._FSDDDVT Splice@chr  | 8.32E-11 | 0.00165  |
| 11Nov2011 | 19595 | 719.39  | 28.86707 | 2 R.FTQAGSE Splice@chr   | 6.57E-14 | 0        |
| 11Nov2011 | 28747 | 1384.75 | 16.84983 | 1 K.FQNFQAI chr2@2226    | 3.69E-10 | 0.006998 |
| 11Nov2011 | 11564 | 1064.58 | -2.00842 | 1 K.YLINGNEI chr1@8687   | 3.58E-11 | 6.78E-04 |
| 11Nov2011 | 11563 | 1063.58 | 1.14882  | 1 K.YLINGNEI chr1@8687   | 3.15E-11 | 5.59E-04 |
| 11Nov2011 | 23180 | 849.93  | 18.38221 | 2 Q.DSSYFVE Splice@chr   | 1.97E-12 | 6.61E-05 |
| 11Nov2011 | 19533 | 719.39  | 28.86707 | 2 R.FTQAGSE Splice@chr   | 5.59E-14 | 0        |
| 11Nov2011 | 30015 | 914.48  | -9.75514 | 2 K.HRCHKNI chr2@1129    | 2.68E-10 | 0.005333 |
| 11Nov2011 | 18544 | 1288.7  | -18.58   | 2 K.TKKQKKK chrX@6244    | 3.07E-10 | 0.005788 |
| 11Nov2011 | 10680 | 1025.61 | -11.6755 | 1 K.LGLGSGI chr5@4945    | 5.21E-12 | 6.61E-05 |
| 11Nov2011 | 16075 | 1075.06 | -6.79295 | 2 R.TCSK+14. chr2@1253   | 6.25E-11 | 0.001377 |
| 11Nov2011 | 32916 | 962.47  | -16.0654 | 3 R.WFWGQI chr4@3030     | 5.52E-10 | 0.009897 |
| 11Nov2011 | 21730 | 774.97  | 29.16015 | 2 E.DILFVINK Splice@chr  | 5.21E-12 | 6.61E-05 |
| 11Nov2011 | 27547 | 849.42  | 8.560987 | 2 Q.DSSYFVE Splice@chr   | 1.94E-11 | 2.55E-04 |
| 11Nov2011 | 17306 | 671.37  | -24.0361 | 2 T.FNIVHTQ Splice@chr   | 1.81E-10 | 0.003453 |
| 11Nov2011 | 15203 | 1173.17 | -9.30319 | 3 K.PTMRTCC Splice@chr   | 2.55E-10 | 0.005017 |
| 11Nov2011 | 34035 | 781.15  | -10.1536 | 4 R.KQEKLGI chr1@3430    | 1.41E-12 | 6.61E-05 |
| 11Nov2011 | 15501 | 1345.63 | -24.7692 | 2 _._QVREMH Splice@chr   | 1.60E-10 | 0.003079 |
| 11Nov2011 | 12398 | 1086.02 | 18.22629 | 2 V.CLTEEGK Splice@chr   | 3.33E-11 | 6.18E-04 |
| 11Nov2011 | 27325 | 890.45  | 26.12723 | 2 K.GWSVPLI Splice@chr   | 2.39E-10 | 0.004807 |
| 11Nov2011 | 27328 | 665.37  | -26.6417 | 2 Q.INNK+14 Splice@chr   | 4.86E-10 | 0.009003 |
| 11Nov2011 | 10990 | 739.4   | 18.15789 | 2 K.M+15.99 chr5@5476    | 5.24E-10 | 0.009556 |
| 11Nov2011 | 15124 | 1173.5  | -13.1731 | 3 K.PTMRTCC Splice@chr   | 5.53E-13 | 0        |
| 11Nov2011 | 19053 | 894.41  | 13.57006 | 2 _._FSDDDVT Splice@chr  | 2.30E-12 | 6.61E-05 |
| 11Nov2011 | 23736 | 1110.04 | -27.8308 | 2 L.LHHHRVL Splice@chr   | 9.75E-11 | 0.001871 |
| 11Nov2011 | 12292 | 862.47  | 2.904885 | 1 _._PIQDVYK Splice@chr  | 2.16E-10 | 0.003991 |
| 11Nov2011 | 28122 | 889.44  | -29.2653 | 2 K.RSSVHTE chr2@8442    | 3.61E-10 | 0.006792 |
| 11Nov2011 | 20052 | 687.41  | 21.43028 | 2 E.M+15.99 chr2@8546    | 5.43E-10 | 0.009746 |
| 11Nov2011 | 27203 | 890.45  | 26.12723 | 2 K.GWSVPLI Splice@chr   | 1.00E-10 | 0.001871 |
| 11Nov2011 | 7079  | 936.48  | 27.86052 | 1 K.LNGGYEC chr2@1191    | 2.24E-11 | 4.41E-04 |
| 11Nov2011 | 30041 | 957.5   | 1.956888 | 3 R.FIEPIEDIF Splice@chr | 1.37E-10 | 0.002533 |
| 11Nov2011 | 28155 | 798.15  | -11.5616 | 4 K.SGDAGIV Splice@chr   | 4.79E-10 | 0.008743 |

|           |       |         |          |                          |          |          |
|-----------|-------|---------|----------|--------------------------|----------|----------|
| 11Nov2011 | 33272 | 929.15  | -28.8338 | 3 R.KSTAKLK chr2@8595    | 4.57E-10 | 0.008436 |
| 11Nov2011 | 29719 | 1135.56 | 14.02138 | 2 _DMDYAF Splice@chr     | 2.99E-10 | 0.005688 |
| 11Nov2011 | 11621 | 1063.58 | 1.14882  | 1 K.YLINGNEI chr1@8687   | 2.98E-10 | 0.005688 |
| 11Nov2011 | 7951  | 1107.56 | -21.6943 | 1 _SSLDKESC chr5@1239    | 2.13E-11 | 3.81E-04 |
| 11Nov2011 | 21901 | 777.91  | 29.12834 | 2 C.TCLERYLE chrX@1535   | 2.84E-10 | 0.005589 |
| 11Nov2011 | 20717 | 685.88  | 4.188613 | 2 K.IVPGGGA chrX@1570    | 4.53E-19 | 0        |
| 11Nov2011 | 27495 | 849.41  | -3.23735 | 2 Q.DSSYFVE Splice@chr   | 1.44E-10 | 0.00264  |
| 11Nov2011 | 830   | 556.31  | 12.70857 | 2 K.KNAEFFLI chr1@9695   | 3.83E-10 | 0.007208 |
| 11Nov2011 | 11053 | 1089.65 | -29.1532 | 1 K.KLKSMKN chr5@3701    | 3.35E-10 | 0.006261 |
| 11Nov2011 | 18659 | 1289.2  | -19.8826 | 2 K.TKKQKKK chrX@6244    | 1.37E-10 | 0.002533 |
| 11Nov2011 | 2002  | 545.31  | -14.6894 | 2 K.RLQPTRY chr5@2375    | 2.56E-10 | 0.005066 |
| 11Nov2011 | 23532 | 916.45  | -9.77166 | 2 G.TEVFGK+ chr1@2717    | 3.28E-10 | 0.006104 |
| 11Nov2011 | 28096 | 798.4   | -12.6137 | 4 K.SGDAGIV Splice@chr   | 1.83E-12 | 6.61E-05 |
| 11Nov2011 | 26270 | 1216.58 | -19.8654 | 2 L.RNTRNDI chr4@1012    | 4.83E-10 | 0.008953 |
| 11Nov2011 | 21729 | 683.37  | 23.88288 | 2 K.FWNVLEI chr3@1304    | 2.85E-10 | 0.005589 |
| 11Nov2011 | 23241 | 849.93  | 18.38221 | 2 Q.DSSYFVE Splice@chr   | 2.62E-13 | 0        |
| 11Nov2011 | 25978 | 831.45  | -1.72693 | 2 R.NTRNQLF chrX@7297    | 1.06E-10 | 0.002037 |
| 11Nov2011 | 31797 | 1272.28 | 27.03865 | 3 K.FAVADEE Splice@chr   | 7.76E-12 | 6.61E-05 |
| 11Nov2011 | 21201 | 664.36  | -7.23808 | 3 _PTLNK+1 chr1@6526     | 4.36E-10 | 0.008025 |
| 11Nov2011 | 26100 | 895     | -10.9918 | 2 K.M+15.99 chrX@1445    | 2.39E-10 | 0.004807 |
| 11Nov2011 | 20351 | 685.88  | 4.188613 | 2 K.IVPGGGA chrX@1570    | 2.90E-13 | 6.73E-05 |
| 11Nov2011 | 18472 | 1289.2  | -19.8826 | 2 K.TKKQKKK chrX@6244    | 3.90E-11 | 0.001021 |
| 11Nov2011 | 31808 | 786.92  | 22.65468 | 2 K.ERSNFSK Splice@chr   | 5.58E-10 | 0.009293 |
| 11Nov2011 | 19263 | 719.38  | 14.92317 | 2 R.FTQAGSE Splice@chr   | 4.55E-13 | 6.73E-05 |
| 11Nov2011 | 5513  | 832.46  | 3.817225 | 1 _FIDVPNK Splice@chr    | 4.99E-10 | 0.008385 |
| 11Nov2011 | 29540 | 718.63  | 5.041863 | 4 R.FIEPIEDIF Splice@chr | 2.16E-10 | 0.004191 |
| 11Nov2011 | 11573 | 1064.58 | -2.00842 | 1 K.YLINGNEI chr1@8687   | 3.33E-10 | 0.005783 |
| 11Nov2011 | 10933 | 739.4   | 18.15789 | 2 K.M+15.99 chr5@5476    | 3.38E-10 | 0.00583  |
| 11Nov2011 | 453   | 722.35  | 3.723    | 1 R.FQGGGEI chr1@2595    | 3.38E-10 | 0.00583  |
| 11Nov2011 | 29220 | 1135.56 | 14.02138 | 2 _DMDYAF Splice@chr     | 5.67E-12 | 1.29E-04 |
| 11Nov2011 | 18317 | 1289.2  | -19.8826 | 2 K.TKKQKKK chrX@6244    | 5.99E-10 | 0.009683 |
| 11Nov2011 | 31787 | 1027.59 | -24.0001 | 2 I.KNELKSKA chrX@6127   | 2.14E-10 | 0.004191 |
| 11Nov2011 | 27630 | 1384.74 | 9.615872 | 1 K.FQNFAQI chr2@2226    | 1.29E-10 | 0.002891 |
| 11Nov2011 | 26752 | 1133.59 | -6.23448 | 3 K.HQLVSAF Splice@chr   | 1.28E-11 | 2.53E-04 |
| 11Nov2011 | 18401 | 1289.2  | -19.8826 | 2 K.TKKQKKK chrX@6244    | 7.88E-11 | 0.001974 |
| 11Nov2011 | 32095 | 1309.62 | -4.17515 | 2 _PFSEARF Splice@chr    | 2.45E-10 | 0.00477  |
| 11Nov2011 | 21543 | 938.45  | -17.4895 | 2 V.SSSDHMI chr5@9285    | 2.70E-10 | 0.005079 |
| 11Nov2011 | 27852 | 1384.74 | 9.615872 | 1 K.FQNFAQI chr2@2226    | 3.36E-10 | 0.00583  |
| 11Nov2011 | 24257 | 784.42  | -26.6807 | 3 _LVK+14.0 Splice@chr   | 3.14E-10 | 0.005581 |
| 11Nov2011 | 31325 | 968.13  | 18.26018 | 3 _GCSIVPIS Splice@chr   | 5.80E-11 | 0.001531 |
| 11Nov2011 | 16340 | 662.86  | 7.984656 | 2 S.INM+15.5 chr4@2551   | 5.54E-10 | 0.009034 |
| 11Nov2011 | 1623  | 710.35  | -23.5478 | 2 R.NFFDK+1 chr4@1075    | 4.74E-10 | 0.008032 |
| 11Nov2011 | 11466 | 1064.58 | -2.00842 | 1 K.YLINGNEI chr1@8687   | 4.75E-11 | 0.001306 |
| 11Nov2011 | 15190 | 587.3   | -11.6155 | 2 W.KNNTNL chr5@1300     | 4.53E-10 | 0.007358 |
| 11Nov2011 | 17631 | 599.34  | -5.64446 | 3 _INKFLIFK chr4@1511    | 3.77E-10 | 0.006283 |
| 11Nov2011 | 26684 | 1133.58 | -15.1469 | 3 K.HQLVSAF Splice@chr   | 1.42E-13 | 6.73E-05 |
| 11Nov2011 | 14942 | 1173.16 | -17.9121 | 3 K.PTMRTCC Splice@chr   | 1.18E-10 | 0.002785 |

|           |       |         |          |                          |          |          |
|-----------|-------|---------|----------|--------------------------|----------|----------|
| 11Nov2011 | 33717 | 962.79  | 5.753783 | 3 _._CSIRPISG Splice@chr | 1.46E-10 | 0.003485 |
| 11Nov2011 | 30357 | 741.87  | -26.1725 | 2 K.KIFLQM+ chr2@1507    | 8.63E-11 | 0.002139 |
| 11Nov2011 | 12787 | 472.76  | -28.4627 | 4 K.KWLGRM chr5@1090     | 2.87E-10 | 0.005333 |
| 11Nov2011 | 21528 | 990.49  | -21.8765 | 2 F.RLSESELE chr4@7519   | 7.25E-11 | 0.001805 |
| 11Nov2011 | 17508 | 914     | 0.03462  | 2 K.VGINYQP chr1@8356    | 5.06E-10 | 0.008435 |
| 11Nov2011 | 29565 | 957.5   | 22.57714 | 3 K.LFQVLQN Splice@chr   | 3.08E-10 | 0.005581 |
| 11Nov2011 | 10808 | 904.49  | -22.4955 | 1 R.DITLSSLR chr3@2830   | 5.71E-10 | 0.00954  |
| 11Nov2011 | 25557 | 792.48  | 26.43103 | 2 R.SRFAPPSI Splice@chr  | 4.63E-10 | 0.007773 |
| 11Nov2011 | 19627 | 887.93  | 29.43791 | 2 I.DEREESTM Splice@chr  | 9.01E-11 | 0.002189 |
| 11Nov2011 | 15700 | 1173.5  | -13.1731 | 3 K.PTMRTCC Splice@chr   | 3.69E-15 | 0        |
| 11Nov2011 | 24045 | 1033.54 | 12.33206 | 2 V.VK+14.01 chr4@1676   | 5.49E-10 | 0.009034 |
| 11Nov2011 | 4657  | 473.77  | 11.87765 | 2 R.TSGALSL chr1@2011    | 3.17E-11 | 6.68E-04 |
| 11Nov2011 | 25792 | 895     | -10.9918 | 2 K.M+15.99 chrX@1449    | 4.14E-10 | 0.006636 |
| 11Nov2011 | 27056 | 665.37  | -26.6417 | 2 Q.INNK+14 Splice@chr   | 3.75E-10 | 0.006234 |
| 11Nov2011 | 27696 | 798.15  | -11.5616 | 4 K.SGDAGIV Splice@chr   | 4.39E-13 | 6.73E-05 |
| 11Nov2011 | 27694 | 1385.74 | 7.1914   | 1 K.FQNFQAI chr2@2226    | 1.66E-10 | 0.003746 |
| 11Nov2011 | 25887 | 1216.58 | -19.8654 | 2 L.RNTRNDI chr4@1012    | 2.59E-10 | 0.004976 |
| 11Nov2011 | 18171 | 894.41  | 13.57006 | 2 _._FSDDDVT Splice@chr  | 4.15E-10 | 0.006636 |
| 11Nov2011 | 7959  | 463.77  | 1.18704  | 2 K.PVNIENLI chrX@1210   | 1.27E-10 | 0.002836 |
| 11Nov2011 | 24674 | 910.99  | -12.6489 | 2 Y.FKNIDKD Splice@chr   | 2.47E-10 | 0.00477  |
| 11Nov2011 | 29755 | 787.88  | 12.22608 | 2 K.FWREIQM chrX@1650    | 5.79E-10 | 0.00954  |
| 11Nov2011 | 32406 | 1000.5  | -25.5062 | 2 E.CLVVNLS Splice@chr   | 4.23E-10 | 0.006897 |
| 11Nov2011 | 10671 | 1026.61 | -14.9497 | 1 K.LGLGSGL chr5@4945    | 6.64E-12 | 1.29E-04 |
| 11Nov2011 | 33959 | 962.79  | 9.56147  | 3 _._GCSIVPIS Splice@chr | 3.42E-11 | 7.85E-04 |
| 11Nov2011 | 14064 | 1173.17 | -9.30319 | 3 K.PTMRTCC Splice@chr   | 1.23E-10 | 0.002836 |
| 11Nov2011 | 29554 | 914.48  | -9.75514 | 2 K.HRCHKNI chr2@1129    | 1.31E-12 | 6.73E-05 |
| 11Nov2011 | 11564 | 1063.58 | 1.14882  | 1 K.YLINGNEI chr1@8687   | 1.17E-10 | 0.002732 |
| 11Nov2011 | 25571 | 831.45  | -1.72693 | 2 R.NTRNQLI chrX@7297    | 6.00E-11 | 0.001587 |
| 11Nov2011 | 2281  | 915.47  | 1.201399 | 1 K.FHEIGGQ chrX@4727    | 1.38E-10 | 0.002993 |
| 11Nov2011 | 14884 | 1173.17 | -9.30319 | 3 K.PTMRTCC Splice@chr   | 1.93E-10 | 0.00399  |
| 11Nov2011 | 9914  | 547.79  | 14.47103 | 2 K.AISFVGGI chr2@1172   | 3.91E-10 | 0.006384 |
| 11Nov2011 | 7133  | 936.48  | 27.86052 | 1 K.LNGGYEC chr2@1191    | 2.73E-11 | 6.11E-04 |
| 11Nov2011 | 30074 | 1212.08 | -15.9059 | 2 K.IRQWRRH Splice@chr   | 1.21E-10 | 0.002785 |
| 11Nov2011 | 14549 | 1094.58 | -2.62363 | 1 R.FEWITKN chr2@6136    | 3.85E-10 | 0.006336 |
| 11Nov2011 | 11875 | 821.44  | 15.92055 | 1 K.TGFGING chrX@2647    | 8.00E-11 | 0.001974 |
| 11Nov2011 | 18046 | 1090.64 | 2.300686 | 1 L.SLIILAM+ Splice@chr  | 5.97E-10 | 0.009683 |
| 11Nov2011 | 33775 | 780.9   | -9.0782  | 4 R.KQEKLGH chr1@3430    | 5.62E-10 | 0.009393 |
| 11Nov2011 | 10832 | 677.34  | -8.57314 | 2 K.MQQFSTI chr5@2080    | 2.30E-10 | 0.004511 |
| 11Nov2011 | 5960  | 971.56  | 2.079638 | 1 R.NGQLNRI chr4@6924    | 4.88E-10 | 0.008183 |
| 11Nov2011 | 11011 | 1089.65 | -29.1532 | 1 K.KLKSMKN chr5@3701    | 2.11E-10 | 0.004142 |
| 11Nov2011 | 9490  | 846.49  | 27.61256 | 1 R.FPGIQGA chr3@1682    | 1.43E-10 | 0.003322 |
| 11Nov2011 | 3452  | 802.45  | -0.37858 | 1 R.IEAGGGC chr5@8776    | 2.11E-12 | 6.73E-05 |
| 11Nov2011 | 20246 | 599.28  | -28.7398 | 2 K.LCSTADT chrX@1481    | 3.31E-10 | 0.005783 |
| 11Nov2011 | 28072 | 1384.74 | 9.615872 | 1 K.FQNFQAI chr2@2226    | 2.70E-10 | 0.005079 |
| 11Nov2011 | 11518 | 1064.58 | -2.00842 | 1 K.YLINGNEI chr1@8687   | 6.10E-11 | 0.001587 |
| 11Nov2011 | 12079 | 975.55  | -20.6673 | 1 K.IPKMPVY chr2@1115    | 9.72E-11 | 0.00224  |
| 11Nov2011 | 15102 | 505.58  | -23.7891 | 3 K.LSSDDFV chr1@3182    | 1.50E-10 | 0.003539 |

|           |       |         |          |                          |          |          |
|-----------|-------|---------|----------|--------------------------|----------|----------|
| 11Nov2011 | 31740 | 1027.59 | -24.0001 | 2 I.KNELKSKA chrX@6127   | 2.69E-10 | 0.005079 |
| 11Nov2011 | 27589 | 890.44  | 14.86661 | 2 K.GWSVPLI Splice@chr   | 2.21E-12 | 6.73E-05 |
| 11Nov2011 | 32149 | 1309.61 | -11.8272 | 2 _PFSEARF Splice@chr    | 3.48E-10 | 0.005931 |
| 11Nov2011 | 24311 | 910.98  | -23.6548 | 2 Y.FKNIDKD Splice@chr   | 4.90E-11 | 0.001306 |
| 11Nov2011 | 8205  | 546.78  | -19.0827 | 2 K.ETETGITE chr4@1221   | 6.61E-11 | 0.001757 |
| 11Nov2011 | 30981 | 1136.55 | -5.37495 | 2 _VCHWK+ chr2@1521      | 3.11E-10 | 0.005581 |
| 11Nov2011 | 19210 | 719.38  | 14.92317 | 2 R.FTQAGSE Splice@chr   | 6.56E-14 | 0        |
| 11Nov2011 | 27813 | 798.15  | -11.5616 | 4 K.SGDAGIV Splice@chr   | 4.51E-12 | 1.29E-04 |
| 11Nov2011 | 5500  | 833.46  | -4.25508 | 1 R.DMVQLV chrX@9811     | 2.88E-10 | 0.005333 |
| 11Nov2011 | 6057  | 756.43  | -9.04908 | 1 R.PLSAAAA chr5@3132    | 5.74E-10 | 0.00954  |
| 11Nov2011 | 26806 | 1133.59 | -6.23448 | 3 K.HQLVSAF Splice@chr   | 1.28E-13 | 6.73E-05 |
| 11Nov2011 | 20408 | 685.88  | 4.188613 | 2 K.IVPGGGA chrX@1570    | 2.72E-17 | 0        |
| 11Nov2011 | 641   | 702.38  | 2.001521 | 1 _DAAGLAC chr3@2528     | 1.29E-11 | 2.53E-04 |
| 11Nov2011 | 26870 | 1133.59 | -6.23448 | 3 K.HQLVSAF Splice@chr   | 5.22E-13 | 6.73E-05 |
| 11Nov2011 | 31364 | 1272.28 | 27.03865 | 3 K.FAVADEE Splice@chr   | 1.93E-13 | 6.73E-05 |
| 11Nov2011 | 23104 | 1078    | -19.9281 | 2 G.QYVQST chr2@4322     | 1.03E-11 | 1.92E-04 |
| 11Nov2011 | 6939  | 741.38  | -23.1647 | 2 K.FPENRHI chr2@1477    | 4.56E-10 | 0.007463 |
| 11Nov2011 | 12156 | 862.47  | 2.904885 | 1 _PIQDVYK Splice@chr    | 3.66E-10 | 0.005975 |
| 11Nov2011 | 19324 | 719.38  | 14.92317 | 2 R.FTQAGSE Splice@chr   | 2.77E-13 | 6.73E-05 |
| 11Nov2011 | 14492 | 1094.58 | -2.62363 | 1 R.FEWITKN chr2@6136    | 4.90E-10 | 0.008286 |
| 11Nov2011 | 31051 | 761.75  | 21.82333 | 3 K.IFSVEICLF chr2@8427  | 4.16E-10 | 0.006687 |
| 11Nov2011 | 14982 | 505.58  | -23.7891 | 3 K.LSSDDFV chr1@3182    | 3.99E-10 | 0.006485 |
| 11Nov2011 | 30400 | 741.87  | -26.1725 | 2 K.KIFLQM+ chr2@1507    | 2.96E-10 | 0.005432 |
| 11Nov2011 | 13282 | 746.36  | -23.1469 | 2 R.SYHYVAF Splice@chr   | 5.67E-10 | 0.009444 |
| 11Nov2011 | 7190  | 936.48  | 27.86052 | 1 K.LNGGYEC chr2@1191    | 3.25E-10 | 0.005736 |
| 11Nov2011 | 22898 | 849.92  | 6.583873 | 2 Q.DSSYFVE Splice@chr   | 1.85E-11 | 3.10E-04 |
| 11Nov2011 | 34659 | 798.39  | 0.039643 | 2 K.VHLVYFN chr5@7770    | 3.45E-10 | 0.005883 |
| 11Nov2011 | 3500  | 802.45  | -0.37858 | 1 R.IEAGGGC chr5@8776    | 1.23E-10 | 0.002836 |
| 11Nov2011 | 31414 | 1272.28 | 27.03865 | 3 K.FAVADEE Splice@chr   | 1.91E-10 | 0.003939 |
| 11Nov2011 | 14011 | 1173.16 | -17.9121 | 3 K.PTMRTCC Splice@chr   | 6.63E-13 | 6.73E-05 |
| 11Nov2011 | 25942 | 1216.58 | -19.8654 | 2 L.RNTRNDI chr4@1012    | 4.82E-10 | 0.00808  |
| 11Nov2011 | 19855 | 687.41  | 21.43028 | 2 E.M+15.99 chr2@8546    | 5.58E-11 | 0.001531 |
| 11Nov2011 | 18953 | 894.4   | 2.427875 | 2 _FDSDDVT Splice@chr    | 3.81E-13 | 6.73E-05 |
| 11Nov2011 | 27758 | 1063.86 | -15.3899 | 3 K.SGDAGIV Splice@chr   | 4.31E-10 | 0.007001 |
| 11Nov2011 | 27757 | 798.15  | -11.5616 | 4 K.SGDAGIV Splice@chr   | 6.38E-13 | 6.73E-05 |
| 11Nov2011 | 4933  | 735.86  | -3.36466 | 2 _KNNFNSI chr5@1616     | 5.42E-10 | 0.008987 |
| 11Nov2011 | 6007  | 756.43  | -9.04908 | 1 R.PLSAAAA chr5@3132    | 4.18E-10 | 0.006687 |
| 11Nov2011 | 18273 | 893.91  | 15.44868 | 2 _FDSDDVT Splice@chr    | 4.51E-10 | 0.007358 |
| 11Nov2011 | 25515 | 831.45  | -1.72693 | 2 R.NTRNQLF chrX@7297    | 3.21E-10 | 0.005581 |
| 11Nov2011 | 18331 | 894.41  | 13.57006 | 2 _FDSDDVT Splice@chr    | 4.46E-10 | 0.007358 |
| 11Nov2011 | 29469 | 957.5   | 1.956888 | 3 R.FIEPIEDIF Splice@chr | 3.74E-10 | 0.006234 |
| 11Nov2011 | 1500  | 632.78  | -25.4076 | 2 _KM+15.9 Splice@chr    | 1.86E-10 | 0.003939 |
| 11Nov2011 | 32448 | 1000.5  | -25.5062 | 2 E.CLVVNLS Splice@chr   | 2.67E-10 | 0.005026 |
| 11Nov2011 | 29169 | 1135.56 | 14.02138 | 2 _DMDYAFI Splice@chr    | 2.17E-11 | 3.10E-04 |
| 11Nov2011 | 13668 | 769.38  | 3.516829 | 4 K.ETVEKEN chr5@7490    | 2.71E-10 | 0.005129 |
| 11Nov2011 | 13341 | 765.38  | -12.3766 | 1 R.SPEHAPK chr5@4294    | 3.94E-10 | 0.006435 |
| 11Nov2011 | 20876 | 664.7   | 1.197202 | 3 _PTLNK+1 chr1@6526     | 4.63E-10 | 0.007773 |

|           |       |         |          |                        |          |          |
|-----------|-------|---------|----------|------------------------|----------|----------|
| 11Nov2011 | 29517 | 957.49  | 12.10816 | 3 K.LFQVLQN Splice@chr | 1.95E-10 | 0.00399  |
| 11Nov2011 | 27702 | 1063.86 | -15.3899 | 3 K.SGDAGIV Splice@chr | 1.76E-11 | 3.10E-04 |
| 11Nov2011 | 31303 | 954.46  | 24.98958 | 4 K.FAVADEE Splice@chr | 1.96E-10 | 0.00399  |
| 11Nov2011 | 29596 | 914.48  | -9.75514 | 2 K.HRCHKN` chr2@1129  | 5.17E-11 | 0.001364 |
| 11Nov2011 | 18737 | 894.4   | 2.427875 | 2 _FSDDDVT Splice@chr  | 1.01E-11 | 1.92E-04 |
| 11Nov2011 | 35445 | 1107.04 | -2.40061 | 2 R.CIDQFQS chr3@9264  | 4.38E-10 | 0.007206 |
| 11Nov2011 | 31222 | 968.13  | 18.26018 | 3 _GCSIVPIS Splice@chr | 8.29E-12 | 1.29E-04 |
| 11Nov2011 | 22833 | 849.92  | 6.583873 | 2 Q.DSSYFVE Splice@chr | 8.30E-12 | 1.29E-04 |
| 11Nov2011 | 285   | 848.41  | 2.093776 | 1 R.EEAELEK. chr2@4805 | 2.25E-10 | 0.004351 |
| 11Nov2011 | 13614 | 769.38  | 3.516829 | 4 K.ETVEKEN chr5@7490  | 2.65E-10 | 0.005026 |
| 11Nov2011 | 27157 | 849.41  | -3.23735 | 2 Q.DSSYFVE Splice@chr | 3.70E-11 | 8.44E-04 |
| 11Nov2011 | 24662 | 853.45  | -23.3178 | 2 K.NFKINSKI chr4@5819 | 3.54E-10 | 0.005931 |
| 11Nov2011 | 8153  | 546.78  | -19.0827 | 2 K.ETETGITC chr4@1221 | 3.03E-10 | 0.005432 |
| 11Nov2011 | 13756 | 1173.17 | -9.30319 | 3 K.PTMRTCC Splice@chr | 1.48E-11 | 2.69E-04 |
| 11Nov2011 | 1233  | 552.3   | 10.18569 | 2 R.TQNATAI Splice@chr | 3.90E-10 | 0.007023 |
| 11Nov2011 | 1457  | 710.36  | -9.42683 | 2 R.NFFDK+1 chr4@1075  | 2.33E-10 | 0.004516 |
| 11Nov2011 | 18033 | 893.91  | 15.44868 | 2 _FSDDDVT Splice@chr  | 5.08E-10 | 0.008569 |
| 11Nov2011 | 572   | 702.38  | 2.001521 | 1 _DAAGLAC chr3@2528   | 5.12E-12 | 6.94E-05 |
| 11Nov2011 | 11949 | 975.55  | -13.0268 | 1 K.LPKLDAYI chr4@1149 | 5.34E-11 | 0.001201 |
| 11Nov2011 | 27503 | 1384.74 | 9.615872 | 1 K.FQNFQAI chr2@2226  | 5.76E-10 | 0.009525 |
| 11Nov2011 | 11297 | 1063.58 | 1.14882  | 1 K.YLINGNEI chr1@8687 | 1.23E-10 | 0.002719 |
| 11Nov2011 | 27152 | 890.44  | 14.86661 | 2 K.GWSVPLI Splice@chr | 9.25E-12 | 1.38E-04 |
| 11Nov2011 | 23704 | 1033.54 | 12.33206 | 2 V.VK+14.01 chr4@1676 | 5.21E-10 | 0.008788 |
| 11Nov2011 | 23911 | 784.42  | -26.6807 | 3 _LVK+14.0 Splice@chr | 2.17E-11 | 6.52E-04 |
| 11Nov2011 | 25513 | 1216.58 | -19.8654 | 2 L.RNTRNDI chr4@1012  | 2.14E-10 | 0.00418  |
| 11Nov2011 | 11199 | 1064.58 | -2.00842 | 1 K.YLINGNEI chr1@8687 | 9.71E-11 | 0.002329 |
| 11Nov2011 | 6933  | 936.48  | 27.86052 | 1 K.LNGGYEC chr2@1191  | 9.61E-11 | 0.002272 |
| 11Nov2011 | 5351  | 832.46  | 3.817225 | 1 _FIDVPNK. Splice@chr | 3.11E-10 | 0.00559  |
| 11Nov2011 | 18736 | 894.41  | 13.57006 | 2 _FSDDDVT Splice@chr  | 5.90E-12 | 6.94E-05 |
| 11Nov2011 | 32632 | 1114.09 | -18.2942 | 2 _TVLQTAC chr5@1395   | 2.25E-10 | 0.004284 |
| 11Nov2011 | 32176 | 1062.11 | 4.94679  | 2 E.EYFFRNL5 chrX@1001 | 2.97E-10 | 0.005377 |
| 11Nov2011 | 25418 | 732.07  | 19.51873 | 3 R.ATDDWII Splice@chr | 2.15E-10 | 0.00418  |
| 11Nov2011 | 14659 | 1173.17 | -9.30319 | 3 K.PTMRTCC Splice@chr | 5.98E-12 | 6.94E-05 |
| 11Nov2011 | 25161 | 831.45  | -14.4052 | 2 K.PM+15.9 chr3@1124  | 1.31E-10 | 0.002719 |
| 11Nov2011 | 29543 | 1212.09 | -7.6374  | 2 K.IRQWRRI Splice@chr | 4.96E-10 | 0.008413 |
| 11Nov2011 | 32268 | 963.13  | 15.42179 | 3 _GCSIVPIS Splice@chr | 4.23E-11 | 8.94E-04 |
| 11Nov2011 | 18031 | 1289.2  | -19.8826 | 2 K.TKKQKKK chrX@6244  | 5.33E-11 | 0.001201 |
| 11Nov2011 | 32089 | 963.13  | 11.61408 | 3 _CSIRPISG Splice@chr | 4.47E-10 | 0.007715 |
| 11Nov2011 | 7909  | 546.78  | -19.0827 | 2 K.ETETGITC chr4@1221 | 1.62E-10 | 0.003583 |
| 11Nov2011 | 18171 | 1289.2  | -19.8826 | 2 K.TKKQKKK chrX@6244  | 3.19E-10 | 0.005646 |
| 11Nov2011 | 21293 | 1090.53 | -18.1295 | 2 K.INGVTVA chr3@6296  | 6.31E-11 | 0.001504 |
| 11Nov2011 | 11249 | 1064.58 | -2.00842 | 1 K.YLINGNEI chr1@8687 | 2.22E-10 | 0.004233 |
| 11Nov2011 | 5836  | 756.43  | -9.04908 | 1 R.PLSAAAA chr5@3132  | 4.73E-10 | 0.007976 |
| 11Nov2011 | 20118 | 685.88  | 4.188613 | 2 K.IVPGGGA chrX@1570  | 4.53E-19 | 0        |
| 11Nov2011 | 26258 | 1133.59 | -6.23448 | 3 K.HQLVSAF Splice@chr | 2.34E-13 | 0        |
| 11Nov2011 | 4050  | 457.25  | 19.59886 | 2 R.QANAVG chr5@1745   | 1.89E-10 | 0.004025 |
| 11Nov2011 | 11358 | 1063.58 | 1.14882  | 1 K.YLINGNEI chr1@8687 | 3.88E-10 | 0.006968 |

|           |       |         |          |                          |          |          |
|-----------|-------|---------|----------|--------------------------|----------|----------|
| 11Nov2011 | 26557 | 665.37  | -26.6417 | 2 Q.INNK+14 Splice@chr   | 5.55E-10 | 0.009264 |
| 11Nov2011 | 2463  | 444.25  | -3.23598 | 2 R.AELSSRPI chr3@8104   | 2.62E-10 | 0.005009 |
| 11Nov2011 | 5732  | 971.56  | 13.66301 | 1 _DSPIIRNR chr2@3547    | 2.04E-10 | 0.004072 |
| 11Nov2011 | 13055 | 765.38  | -12.3766 | 1 R.SPEHAPK chr5@4294    | 1.98E-10 | 0.004072 |
| 11Nov2011 | 14940 | 1345.63 | -24.7692 | 2 _QVREMH Splice@chr     | 1.76E-10 | 0.003989 |
| 11Nov2011 | 19357 | 887.93  | 29.43791 | 2 I.DEREESTM Splice@chr  | 3.32E-11 | 7.14E-04 |
| 11Nov2011 | 27299 | 798.15  | -11.5616 | 4 K.SGDAGIV Splice@chr   | 5.40E-11 | 0.001201 |
| 11Nov2011 | 32285 | 1147.25 | 13.44098 | 3 R.FQSAAIG Splice@chr   | 2.50E-13 | 0        |
| 11Nov2011 | 13483 | 565.83  | 14.11658 | 2 R.ISLTNANI chr5@7795   | 5.24E-10 | 0.008896 |
| 11Nov2011 | 26750 | 849.41  | -3.23735 | 2 Q.DSSYFVE Splice@chr   | 2.56E-10 | 0.004958 |
| 11Nov2011 | 21174 | 990.49  | -21.8765 | 2 F.RLSESELE chr4@7519   | 2.51E-10 | 0.004849 |
| 11Nov2011 | 16696 | 671.37  | -24.0361 | 2 T.FNIVHTQ Splice@chr   | 5.31E-10 | 0.008949 |
| 11Nov2011 | 10692 | 1089.65 | -29.1532 | 1 K.KLKSMKN chr5@3701    | 4.06E-11 | 8.36E-04 |
| 11Nov2011 | 10690 | 739.4   | 18.15789 | 2 K.M+15.99 chr5@5476    | 5.26E-10 | 0.008896 |
| 11Nov2011 | 29129 | 957.5   | 1.956888 | 3 R.FIEPIEDIF Splice@chr | 1.41E-10 | 0.003127 |
| 11Nov2011 | 18678 | 894.4   | 2.427875 | 2 _FSDDDVT Splice@chr    | 3.66E-12 | 6.94E-05 |
| 11Nov2011 | 27222 | 1384.75 | 16.84983 | 1 K.FQNFQAI chr2@2226    | 4.87E-10 | 0.008085 |
| 11Nov2011 | 11306 | 1064.58 | -2.00842 | 1 K.YLINGNEI chr1@8687   | 9.31E-11 | 0.002153 |
| 11Nov2011 | 6284  | 685.38  | -12.3964 | 2 K.ISTQTHIC chr4@7638   | 2.68E-10 | 0.005232 |
| 11Nov2011 | 3390  | 439.74  | 18.7116  | 2 R.SIAMFGP chr2@4157    | 6.97E-11 | 0.001615 |
| 11Nov2011 | 22988 | 1110.04 | -27.8308 | 2 L.LHHHRVL Splice@chr   | 1.27E-10 | 0.002719 |
| 11Nov2011 | 25223 | 831.45  | -1.72693 | 2 R.NTRNQLF chrX@7297    | 3.03E-10 | 0.005377 |
| 11Nov2011 | 13023 | 746.36  | -23.1469 | 2 R.SYHYVAF Splice@chr   | 5.37E-11 | 0.001201 |
| 11Nov2011 | 17815 | 1090.64 | 2.300686 | 1 L.SLIILAM+ Splice@chr  | 3.17E-10 | 0.00559  |
| 11Nov2011 | 18111 | 1289.2  | -19.8826 | 2 K.TKKQKKK chrX@6244    | 4.86E-10 | 0.008085 |
| 11Nov2011 | 19382 | 687.41  | 21.43028 | 2 E.M+15.99 chr2@8546    | 3.14E-10 | 0.00559  |
| 11Nov2011 | 29809 | 741.88  | -12.6527 | 2 K.KIFLQM+ chr2@1507    | 1.06E-10 | 0.002443 |
| 11Nov2011 | 7694  | 463.77  | 1.18704  | 2 K.PVNIENLI chrX@1210   | 7.60E-11 | 0.001737 |
| 11Nov2011 | 7689  | 1106.56 | -18.6599 | 1 _SSLDKESC chr5@1239    | 4.81E-10 | 0.007976 |
| 11Nov2011 | 3246  | 802.45  | -0.37858 | 1 R.IEAGGGG chr5@8776    | 1.89E-12 | 0        |
| 11Nov2011 | 27352 | 798.15  | -11.5616 | 4 K.SGDAGIV Splice@chr   | 6.47E-12 | 6.94E-05 |
| 11Nov2011 | 6775  | 741.38  | -23.1647 | 2 K.FPENRHL chr2@1477    | 2.66E-10 | 0.00518  |
| 11Nov2011 | 30599 | 1287.67 | -29.2202 | 2 K.FRQELNS chrX@2164    | 6.08E-11 | 0.001443 |
| 11Nov2011 | 16874 | 671.37  | -24.0361 | 2 T.FNIVHTQ Splice@chr   | 2.40E-10 | 0.004623 |
| 11Nov2011 | 17513 | 1111.1  | -11.1063 | 2 R.LLM+15.9 chr4@3284   | 2.36E-10 | 0.00457  |
| 11Nov2011 | 26374 | 1133.6  | 2.534207 | 3 K.HQLVSAF Splice@chr   | 1.27E-11 | 2.03E-04 |
| 11Nov2011 | 11240 | 1063.58 | 1.14882  | 1 K.YLINGNEI chr1@8687   | 3.78E-10 | 0.006804 |
| 11Nov2011 | 9722  | 1104.54 | -29.2022 | 1 _M+15.99 chr2@1285     | 1.31E-10 | 0.002719 |
| 11Nov2011 | 23956 | 910.98  | -23.6548 | 2 Y.FKNIDKD Splice@chr   | 2.56E-10 | 0.004958 |
| 11Nov2011 | 18948 | 719.38  | 14.92317 | 2 R.FTQAGSE Splice@chr   | 1.50E-13 | 0        |
| 11Nov2011 | 5884  | 756.43  | -9.04908 | 1 R.PLSAAAA chr5@3132    | 5.66E-10 | 0.009312 |
| 11Nov2011 | 27189 | 889.94  | 16.75361 | 2 K.GWSVPLI Splice@chr   | 5.82E-11 | 0.001384 |
| 11Nov2011 | 31896 | 963.14  | 25.74479 | 3 _GCSIVPIS Splice@chr   | 8.90E-12 | 1.38E-04 |
| 11Nov2011 | 4491  | 473.77  | 11.87765 | 2 R.TSGALSL chr1@2011    | 1.50E-10 | 0.003238 |
| 11Nov2011 | 6724  | 741.39  | -17.2291 | 2 K.QKSNWH chr5@1229     | 8.22E-12 | 6.94E-05 |
| 11Nov2011 | 13428 | 565.83  | 14.11658 | 2 R.ISLTNANI chr5@7795   | 4.93E-10 | 0.008306 |
| 11Nov2011 | 19010 | 719.39  | 28.86707 | 2 R.FTQAGSE Splice@chr   | 6.65E-13 | 0        |

|           |       |         |          |                          |          |          |
|-----------|-------|---------|----------|--------------------------|----------|----------|
| 11Nov2011 | 29049 | 957.5   | 22.57714 | 3 K.LFQVLQN Splice@chr   | 4.53E-10 | 0.007767 |
| 11Nov2011 | 4236  | 463.3   | -2.70655 | 2 K.LTVIARPF chr3@1376   | 4.96E-10 | 0.008413 |
| 11Nov2011 | 27750 | 1003.18 | 7.145987 | 3 R.CWNRRA Splice@chr    | 5.20E-12 | 6.94E-05 |
| 11Nov2011 | 6386  | 1274.08 | 14.02996 | 2 L.EDESAAV Splice@chr   | 3.90E-10 | 0.007023 |
| 11Nov2011 | 18890 | 719.38  | 14.92317 | 2 R.FTQAGSE Splice@chr   | 1.79E-13 | 0        |
| 11Nov2011 | 2515  | 444.25  | -3.23598 | 2 R.AELSSRPI chr3@8104   | 2.58E-10 | 0.004958 |
| 11Nov2011 | 9638  | 547.79  | 14.47103 | 2 K.AISFVGGI chr2@1172   | 6.60E-11 | 0.001558 |
| 11Nov2011 | 1355  | 632.78  | -25.4076 | 2 _ .KM+15.9 Splice@chr  | 1.79E-10 | 0.004025 |
| 11Nov2011 | 26525 | 889.95  | -19.8868 | 2 K.RSSVHTE chr2@8442    | 4.77E-10 | 0.007976 |
| 11Nov2011 | 25172 | 521.3   | 24.95499 | 2 R.NLNEVEII chr4@1305   | 3.03E-10 | 0.005377 |
| 11Nov2011 | 6330  | 1274.07 | 6.16406  | 2 L.EDESAAV Splice@chr   | 3.03E-10 | 0.005377 |
| 11Nov2011 | 10594 | 677.34  | -8.57314 | 2 K.MQQFST chr5@2080     | 5.82E-10 | 0.009801 |
| 11Nov2011 | 1256  | 552.3   | 10.18569 | 2 R.TQNATAI Splice@chr   | 2.73E-10 | 0.005232 |
| 11Nov2011 | 20179 | 685.88  | 4.188613 | 2 K.IVPGGGA chrX@1570    | 5.49E-10 | 0.009264 |
| 11Nov2011 | 16135 | 749.39  | -17.0141 | 2 _ .RLQHAM Splice@chr   | 3.05E-11 | 6.52E-04 |
| 11Nov2011 | 18538 | 894.41  | 13.57006 | 2 _ .FSDDDVT Splice@chr  | 8.10E-12 | 6.94E-05 |
| 11Nov2011 | 24406 | 853.45  | -23.3178 | 2 K.NFKINSKI chr4@5819   | 5.82E-10 | 0.009745 |
| 11Nov2011 | 25575 | 1216.58 | -19.8654 | 2 L.RNTRNDI chr4@1012    | 3.92E-10 | 0.007079 |
| 11Nov2011 | 26458 | 889.95  | -19.8868 | 2 K.RSSVHTE chr2@8442    | 1.35E-10 | 0.002773 |
| 11Nov2011 | 29088 | 957.5   | 1.956888 | 3 R.FIEPIEDIF Splice@chr | 2.24E-10 | 0.004284 |
| 11Nov2011 | 29506 | 1212.08 | -15.9059 | 2 K.IRQWRRR Splice@chr   | 7.15E-11 | 0.001615 |
| 11Nov2011 | 11606 | 821.44  | 15.92055 | 1 K.TGFGING chrX@2647    | 2.15E-10 | 0.00418  |
| 11Nov2011 | 4544  | 473.77  | 11.87765 | 2 R.TSGALSL chr1@2011    | 2.07E-10 | 0.004072 |
| 11Nov2011 | 19565 | 687.41  | 21.43028 | 2 E.M+15.99 chr2@8546    | 5.76E-10 | 0.009525 |
| 11Nov2011 | 29173 | 980.05  | -22.3594 | 2 K.K+14.016 chrX@3807   | 4.76E-11 | 9.56E-04 |
| 11Nov2011 | 9436  | 493.78  | -11.3951 | 2 R.KNQENLI Splice@chr   | 2.38E-10 | 0.004623 |
| 11Nov2011 | 22513 | 849.93  | 18.38221 | 2 Q.DSSYFVE Splice@chr   | 3.05E-12 | 0        |
| 11Nov2011 | 11187 | 1063.58 | 1.14882  | 1 K.YLINGNEI chr1@8687   | 1.76E-10 | 0.004025 |
| 11Nov2011 | 10448 | 752.88  | -14.2545 | 2 R.GKCNGG chr4@5126     | 5.68E-10 | 0.009363 |
| 11Nov2011 | 18477 | 894.4   | 2.427875 | 2 _ .FSDDDVT Splice@chr  | 6.69E-12 | 6.94E-05 |
| 11Nov2011 | 1460  | 632.78  | -25.4076 | 2 _ .KM+15.9 Splice@chr  | 9.40E-11 | 0.002272 |
| 11Nov2011 | 9699  | 547.79  | 14.47103 | 2 K.AISFVGGI chr2@1172   | 3.92E-10 | 0.007079 |
| 11Nov2011 | 12008 | 975.56  | -2.75567 | 1 K.LPKLDAYI chr4@1149   | 3.81E-11 | 7.73E-04 |
| 11Nov2011 | 14241 | 1094.58 | -2.62363 | 1 R.FEWITKN chr2@6136    | 1.95E-10 | 0.004025 |
| 11Nov2011 | 19617 | 687.41  | 21.43028 | 2 E.M+15.99 chr2@8546    | 4.43E-10 | 0.007666 |
| 11Nov2011 | 1286  | 552.3   | 10.18569 | 2 R.TQNATAI Splice@chr   | 1.45E-10 | 0.003185 |
| 11Nov2011 | 888   | 403.23  | 10.8661  | 2 R.AMVASG chr5@1721     | 5.06E-10 | 0.008569 |
| 11Nov2011 | 20854 | 1039.54 | -8.43655 | 2 K.YSPNLRA chr4@4065    | 9.79E-11 | 0.002329 |
| 11Nov2011 | 20585 | 664.7   | 1.197202 | 3 _ .PTLNK+1 chr1@6526   | 9.24E-11 | 0.002091 |
| 11Nov2011 | 32139 | 780.9   | -9.0782  | 4 R.KQEKLG+ chr1@3430    | 2.24E-10 | 0.004233 |
| 11Nov2011 | 10761 | 1090.66 | -23.0402 | 1 K.KLKSMKN chr5@3701    | 4.06E-11 | 8.36E-04 |
| 11Nov2011 | 22466 | 792.67  | 25.51992 | 4 I.SRVEDDS Splice@chr   | 4.96E-10 | 0.008413 |
| 11Nov2011 | 22461 | 849.93  | 18.38221 | 2 Q.DSSYFVE Splice@chr   | 1.57E-11 | 2.69E-04 |
| 11Nov2011 | 21342 | 1090.53 | -18.1295 | 2 K.INGVTVA chr3@6296    | 9.82E-11 | 0.002329 |
| 11Nov2011 | 6930  | 636.34  | -9.79885 | 2 R.SK+14.01 chrX@1409   | 6.12E-10 | 0.00985  |
| 11Nov2011 | 644   | 702.38  | 2.001521 | 1 _ .DAAGLAC chr3@2528   | 5.21E-12 | 0        |
| 11Nov2011 | 22411 | 849.93  | 18.38221 | 2 Q.DSSYFVE Splice@chr   | 1.13E-12 | 0        |

|           |       |         |          |                          |          |          |
|-----------|-------|---------|----------|--------------------------|----------|----------|
| 11Nov2011 | 5819  | 831.43  | -12.728  | 1 K.NEGKTGF chr1@8724    | 2.14E-10 | 0.003878 |
| 11Nov2011 | 7321  | 1073.56 | 20.18419 | 2 L.KIDDFEII chr4@1685   | 2.89E-10 | 0.004959 |
| 11Nov2011 | 18776 | 923.02  | 9.903217 | 2 R.TLNNLKV chr2@1060    | 4.98E-10 | 0.008081 |
| 11Nov2011 | 4052  | 928.48  | 5.067247 | 1 K.FRSHPER chr5@3821    | 5.07E-10 | 0.008229 |
| 11Nov2011 | 6359  | 849.72  | 10.96034 | 3 L.EDESAAY Splice@chr   | 2.34E-10 | 0.004409 |
| 11Nov2011 | 22495 | 849.92  | 6.583873 | 2 Q.DSSYFVE Splice@chr   | 2.15E-11 | 3.72E-04 |
| 11Nov2011 | 30624 | 1272.28 | 27.03865 | 3 K.FAVADEE Splice@chr   | 7.66E-13 | 0        |
| 11Nov2011 | 13333 | 565.83  | 14.11658 | 2 R.ISLTNANI chr5@7795   | 4.37E-10 | 0.007221 |
| 11Nov2011 | 14638 | 505.58  | -23.7891 | 3 K.LSSDDFV chr1@3182    | 5.51E-10 | 0.008942 |
| 11Nov2011 | 23466 | 1275.6  | -25.4649 | 3 R.YSSECPE Splice@chr   | 3.35E-10 | 0.005522 |
| 11Nov2011 | 23406 | 1275.6  | -25.4649 | 3 R.YSSECPE Splice@chr   | 6.65E-12 | 0        |
| 11Nov2011 | 25381 | 1216.58 | -19.8654 | 2 L.RNTRNDI chr4@1012    | 1.30E-10 | 0.002667 |
| 11Nov2011 | 17217 | 893.98  | 23.35659 | 2 K.CTHLDKT chr5@2031    | 3.63E-10 | 0.006258 |
| 11Nov2011 | 30614 | 954.46  | 24.98958 | 4 K.FAVADEE Splice@chr   | 1.55E-10 | 0.003031 |
| 11Nov2011 | 30615 | 1103.08 | -12.4932 | 2 R.LDRPMS chr3@5228     | 2.89E-10 | 0.004959 |
| 11Nov2011 | 20054 | 685.88  | 4.188613 | 2 K.IVPGGGA chrX@1570    | 1.88E-17 | 0        |
| 11Nov2011 | 6606  | 741.38  | -23.1647 | 2 K.FPENRHI chr2@1477    | 1.20E-10 | 0.002563 |
| 11Nov2011 | 34316 | 1107.04 | -2.40061 | 2 R.CIDQFQS chr3@9264    | 4.73E-10 | 0.007724 |
| 11Nov2011 | 5155  | 832.46  | 3.817225 | 1 _FIDVPNK Splice@chr    | 4.52E-10 | 0.007367 |
| 11Nov2011 | 11346 | 456.75  | 6.294503 | 2 R.KTYLMEK Splice@chr   | 3.73E-10 | 0.006466 |
| 11Nov2011 | 10237 | 1026.61 | -14.9497 | 1 K.LGLGSGL chr5@4945    | 5.64E-12 | 0        |
| 11Nov2011 | 31600 | 980.47  | -17.2661 | 3 K.SGTIFDNI Splice@chr  | 5.43E-11 | 0.001244 |
| 11Nov2011 | 2982  | 485.29  | -1.00826 | 2 R.IKDVEIPR chr2@9251   | 7.83E-11 | 0.001918 |
| 11Nov2011 | 18859 | 719.39  | 28.86707 | 2 R.FTQAGSE Splice@chr   | 3.38E-13 | 0        |
| 11Nov2011 | 3159  | 439.74  | 18.7116  | 2 R.SIAMFGP chr2@4157    | 3.91E-10 | 0.00688  |
| 11Nov2011 | 10554 | 904.49  | -22.4955 | 1 R.DITLSSLR chr3@2830   | 5.71E-10 | 0.009246 |
| 11Nov2011 | 21043 | 833.42  | -19.2103 | 2 _IIEPYVAV Splice@chr   | 3.05E-11 | 6.73E-04 |
| 11Nov2011 | 26401 | 889.95  | -19.8868 | 2 K.RSSVHTE chr2@8442    | 5.20E-10 | 0.008278 |
| 11Nov2011 | 7806  | 546.78  | -19.0827 | 2 K.ETETGIT chr4@1221    | 7.50E-13 | 0        |
| 11Nov2011 | 11416 | 1086.01 | 9.000639 | 2 V.CLTEEGK Splice@chr   | 7.40E-12 | 0        |
| 11Nov2011 | 3908  | 412.23  | 25.3069  | 2 R.IASYQGG chrX@1679    | 3.11E-11 | 7.32E-04 |
| 11Nov2011 | 28913 | 957.5   | 1.956888 | 3 R.FIEPIEDIF Splice@chr | 4.56E-10 | 0.007471 |
| 11Nov2011 | 23350 | 1275.6  | -25.4649 | 3 R.YSSECPE Splice@chr   | 9.69E-11 | 0.002128 |
| 11Nov2011 | 22402 | 792.67  | 25.51992 | 4 I.SRVEDDS Splice@chr   | 6.83E-11 | 0.001872 |
| 11Nov2011 | 3374  | 462.25  | -27.4573 | 2 R.SSRPIAH chr1@1067    | 2.20E-10 | 0.004034 |
| 11Nov2011 | 27083 | 1384.74 | 9.615872 | 1 K.FQNFQAI chr2@2226    | 4.17E-10 | 0.007128 |
| 11Nov2011 | 29641 | 741.87  | -26.1725 | 2 K.KIFLQM+ chr2@1507    | 8.21E-11 | 0.002022 |
| 11Nov2011 | 19537 | 687.41  | 21.43028 | 2 E.M+15.99 chr2@8546    | 3.25E-10 | 0.005368 |
| 11Nov2011 | 24324 | 853.45  | -23.3178 | 2 K.NFKINSKI chr4@5819   | 5.85E-10 | 0.009293 |
| 11Nov2011 | 10563 | 739.4   | 18.15789 | 2 K.M+15.99 chr5@5476    | 4.85E-10 | 0.008036 |
| 11Nov2011 | 15887 | 599.34  | -5.64446 | 3 _INKFLIFK chr4@1511    | 6.13E-10 | 0.00985  |
| 11Nov2011 | 30460 | 954.46  | 24.98958 | 4 K.FAVADEE Splice@chr   | 2.88E-11 | 6.12E-04 |
| 11Nov2011 | 29054 | 876.99  | -11.1881 | 2 V.FPCK+14 chrX@2447    | 3.24E-10 | 0.005368 |
| 11Nov2011 | 926   | 845.47  | 16.40714 | 1 R.FAVYFAK chr1@8163    | 4.01E-10 | 0.00693  |
| 11Nov2011 | 11868 | 975.55  | -13.0268 | 1 K.LPKLDAYI chr4@1149   | 3.69E-10 | 0.006361 |
| 11Nov2011 | 11860 | 724.35  | 19.12636 | 3 V.CLTEEGK Splice@chr   | 1.56E-12 | 0        |
| 11Nov2011 | 32440 | 963.13  | 11.61408 | 3 _CSIRPISG Splice@chr   | 7.08E-12 | 0        |

|           |       |         |          |                          |          |          |
|-----------|-------|---------|----------|--------------------------|----------|----------|
| 11Nov2011 | 26640 | 849.41  | -3.23735 | 2 Q.DSSYFVE Splice@chr   | 3.84E-11 | 9.68E-04 |
| 11Nov2011 | 12987 | 625.82  | -20.2839 | 2 R.K+14.016 chrX@1356   | 5.72E-10 | 0.009246 |
| 11Nov2011 | 30516 | 954.46  | 24.98958 | 4 K.FAFADEE Splice@chr   | 9.44E-12 | 0        |
| 11Nov2011 | 5753  | 433.76  | 2.609238 | 2 _IVDLP GPI chr3@1104   | 8.99E-11 | 0.002022 |
| 11Nov2011 | 11166 | 1064.58 | -2.00842 | 1 K.YLINGNEI chr1@8687   | 8.41E-11 | 0.002022 |
| 11Nov2011 | 11164 | 1063.58 | 1.14882  | 1 K.YLINGNEI chr1@8687   | 5.43E-11 | 0.001244 |
| 11Nov2011 | 6089  | 685.37  | -27.0225 | 2 K.ISTQTHIC chr4@7638   | 3.63E-10 | 0.006258 |
| 11Nov2011 | 20811 | 1039.54 | -8.43655 | 2 K.YSPNLRA chr4@4065    | 4.48E-10 | 0.007317 |
| 11Nov2011 | 11463 | 724.35  | 19.12636 | 3 V.CLTEEGK Splice@chr   | 2.91E-10 | 0.004959 |
| 11Nov2011 | 17442 | 1111.1  | -11.1063 | 2 R.LLM+15.5 chr4@3284   | 1.42E-10 | 0.002936 |
| 11Nov2011 | 7753  | 546.78  | -19.0827 | 2 K.ETETGITC chr4@1221   | 7.41E-11 | 0.001918 |
| 11Nov2011 | 20562 | 664.7   | 1.197202 | 3 _PTLNK+1. chr1@6526    | 6.71E-11 | 0.001761 |
| 11Nov2011 | 723   | 632.78  | -25.4076 | 2 _KM+15.9 Splice@chr    | 2.17E-10 | 0.004034 |
| 11Nov2011 | 32903 | 1147.24 | 4.705638 | 3 R.FQSAAIG Splice@chr   | 6.60E-14 | 0        |
| 11Nov2011 | 28547 | 1135.56 | 14.02138 | 2 _DMDYAFI Splice@chr    | 2.36E-11 | 3.72E-04 |
| 11Nov2011 | 31841 | 917.51  | 5.964791 | 2 _SIMSRLEI Splice@chr   | 5.94E-10 | 0.009392 |
| 11Nov2011 | 7422  | 831.49  | -4.77706 | 1 _SIVGNLTI Splice@chr   | 5.32E-10 | 0.008585 |
| 11Nov2011 | 4436  | 735.86  | -3.36466 | 2 _KNNFNSI chr5@1616     | 5.38E-10 | 0.008686 |
| 11Nov2011 | 14919 | 897.42  | -27.6753 | 3 _QVREMH Splice@chr     | 4.14E-10 | 0.007128 |
| 11Nov2011 | 30573 | 1272.28 | 27.03865 | 3 K.FAFADEE Splice@chr   | 1.15E-13 | 0        |
| 11Nov2011 | 28863 | 957.5   | 1.956888 | 3 R.FIEPIEDIF Splice@chr | 3.93E-10 | 0.00688  |
| 11Nov2011 | 11108 | 1063.58 | 1.14882  | 1 K.YLINGNEI chr1@8687   | 5.04E-10 | 0.008229 |
| 11Nov2011 | 19593 | 687.41  | 21.43028 | 2 E.M+15.99 chr2@8546    | 1.16E-10 | 0.002563 |
| 11Nov2011 | 7785  | 875.49  | 11.27984 | 2 K.KIILMM+ chr4@5840    | 6.87E-11 | 0.001872 |
| 11Nov2011 | 21872 | 1034.57 | -2.45085 | 2 K.FK+14.01 Splice@chr  | 6.14E-12 | 0        |
| 11Nov2011 | 18977 | 719.38  | 14.92317 | 2 R.FTQAGSE Splice@chr   | 1.26E-12 | 0        |
| 11Nov2011 | 10623 | 1089.65 | -29.1532 | 1 K.KLKSMKN chr5@3701    | 1.22E-10 | 0.002616 |
| 11Nov2011 | 5811  | 433.76  | 2.609238 | 2 _IVDLP GPI chr3@1104   | 8.57E-11 | 0.002022 |
| 11Nov2011 | 9013  | 434.24  | 13.9946  | 3 _RSNDQTI chr5@6378     | 5.20E-11 | 0.00119  |
| 11Nov2011 | 11113 | 1064.58 | -2.00842 | 1 K.YLINGNEI chr1@8687   | 7.48E-11 | 0.001918 |
| 11Nov2011 | 31537 | 1000.5  | -25.5062 | 2 E.CLVVNLS Splice@chr   | 2.80E-10 | 0.004698 |
| 11Nov2011 | 10472 | 677.34  | -8.57314 | 2 K.MQQFSTI chr5@2080    | 1.52E-10 | 0.003031 |
| 11Nov2011 | 23603 | 1033.54 | 12.33206 | 2 V.VK+14.01 chr4@1676   | 2.51E-10 | 0.00459  |
| 11Nov2011 | 26385 | 890.45  | 26.12723 | 2 K.GWSVPLI Splice@chr   | 1.18E-10 | 0.002563 |
| 11Nov2011 | 14848 | 587.3   | -11.6155 | 2 W.KNNTNI chr5@1300     | 1.64E-10 | 0.003138 |
| 11Nov2011 | 10545 | 1161.65 | -28.0507 | 1 K.NSKDKLV Splice@chr   | 8.65E-11 | 0.002022 |
| 11Nov2011 | 3211  | 439.74  | 18.7116  | 2 R.SIAMFGP chr2@4157    | 2.49E-10 | 0.004563 |
| 11Nov2011 | 10336 | 1025.61 | -11.6755 | 1 K.LGLGSGI chr5@4945    | 1.12E-11 | 0        |
| 11Nov2011 | 9903  | 430.72  | -18.1094 | 2 R.SSTAGNP Splice@chr   | 3.04E-10 | 0.005167 |
| 11Nov2011 | 25099 | 831.45  | -14.4052 | 2 K.PM+15.9 chr3@1124    | 3.19E-10 | 0.005318 |
| 11Nov2011 | 27189 | 1384.74 | 9.615872 | 1 K.FQNFQAI chr2@2226    | 1.58E-10 | 0.003031 |
| 11Nov2011 | 6556  | 741.38  | -23.1647 | 2 K.FPENRHI chr2@1477    | 9.30E-11 | 0.002077 |
| 11Nov2011 | 28821 | 957.5   | 22.57714 | 3 K.LFQVLQN Splice@chr   | 1.44E-10 | 0.003031 |
| 11Nov2011 | 23182 | 784.93  | -12.0354 | 2 K.M+15.99 chr1@2456    | 5.93E-10 | 0.009392 |
| 11Nov2011 | 13284 | 565.83  | 14.11658 | 2 R.ISLTNANI chr5@7793   | 3.61E-10 | 0.006099 |
| 11Nov2011 | 20114 | 685.88  | 4.188613 | 2 K.IVPGGGA chrX@1570    | 4.91E-15 | 0        |
| 11Nov2011 | 33962 | 1026.49 | -2.11289 | 2 E.FDFLIQLC Splice@chr  | 1.09E-10 | 0.002462 |

|           |       |         |          |                          |          |          |
|-----------|-------|---------|----------|--------------------------|----------|----------|
| 11Nov2011 | 33959 | 1155.59 | 29.18146 | 2 R.AWQALL chr2@1382     | 4.07E-10 | 0.007084 |
| 11Nov2011 | 31486 | 1000.5  | -25.5062 | 2 E.CLVVNLS Splice@chr   | 1.98E-11 | 2.50E-04 |
| 11Nov2011 | 30946 | 786.92  | 22.65468 | 2 K.ERSNFSKI Splice@chr  | 3.77E-10 | 0.006626 |
| 11Nov2011 | 11924 | 1086.02 | 18.22629 | 2 V.CLTEEGK Splice@chr   | 6.17E-11 | 0.001531 |
| 11Nov2011 | 23470 | 804.91  | 25.79416 | 2 _LTMTWN chr1@4513      | 2.02E-10 | 0.003832 |
| 11Nov2011 | 29148 | 634.34  | 9.059    | 2 R.VDIGDILF Splice@chr  | 1.54E-10 | 0.003031 |
| 11Nov2011 | 7527  | 1107.56 | -21.6943 | 1 _SSLDKESC chr5@1239    | 8.34E-11 | 0.002022 |
| 11Nov2011 | 10989 | 566.31  | 21.45326 | 2 R.EVAQLEC chr5@1706    | 6.07E-11 | 0.001531 |
| 11Nov2011 | 12928 | 625.82  | -11.1921 | 2 I.QLEDIEFIS Splice@chr | 6.03E-10 | 0.009652 |
| 11Nov2011 | 11521 | 821.44  | 15.92055 | 1 K.TGFGING chrX@2647    | 1.11E-10 | 0.002515 |
| 11Nov2011 | 21166 | 990.49  | -21.8765 | 2 F.RLSESELE chr4@7519   | 3.88E-10 | 0.006834 |
| 11Nov2011 | 6036  | 685.37  | -27.0225 | 2 K.ISTQTHIC chr4@7638   | 3.51E-10 | 0.005996 |
| 11Nov2011 | 30469 | 1272.28 | 27.03865 | 3 K.FAVADEE Splice@chr   | 2.69E-14 | 0        |
| 11Nov2011 | 30866 | 1027.59 | -24.0001 | 2 I.KNELKSKA chrX@6127   | 2.52E-10 | 0.00459  |
| 11Nov2011 | 12455 | 472.76  | -28.4627 | 4 K.KWLGRM chr5@1090     | 1.65E-10 | 0.003138 |
| 11Nov2011 | 7448  | 553.78  | -10.2208 | 2 R.TASQK+1 chrX@5438    | 1.72E-10 | 0.003247 |
| 11Nov2011 | 16071 | 749.39  | -17.0141 | 2 _RLQHAM Splice@chr     | 8.39E-12 | 0        |
| 11Nov2011 | 11858 | 1086.01 | 9.000639 | 2 V.CLTEEGK Splice@chr   | 3.76E-11 | 9.08E-04 |
| 11Nov2011 | 7632  | 798.4   | -21.4056 | 2 R.FSGTELLI chr1@8832   | 5.12E-10 | 0.008229 |
| 11Nov2011 | 30164 | 980.55  | 4.33387  | 2 H.VLEAAFV chr5@1973    | 4.36E-10 | 0.007221 |
| 11Nov2011 | 18915 | 719.38  | 14.92317 | 2 R.FTQAGSE Splice@chr   | 2.27E-13 | 0        |
| 11Nov2011 | 9270  | 831.48  | 13.44968 | 1 R.SSINAALF Splice@chr  | 4.93E-10 | 0.008081 |
| 11Nov2011 | 9851  | 868.42  | -0.63154 | 1 K.SSSGSLSS chr2@1132   | 5.72E-10 | 0.009246 |
| 11Nov2011 | 29599 | 741.88  | -12.6527 | 2 K.KIFLQM+ chr2@1507    | 3.13E-10 | 0.005216 |
| 11Nov2011 | 21813 | 1034.57 | -2.45085 | 2 K.FK+14.01 Splice@chr  | 3.35E-11 | 8.48E-04 |
| 11Nov2011 | 6229  | 876.4   | -19.8707 | 1 K.TEDEARR chrX@1138    | 1.59E-10 | 0.003031 |
| 11Nov2011 | 677   | 552.3   | 10.18569 | 2 R.TQNATAI Splice@chr   | 2.36E-11 | 3.72E-04 |
| 11Nov2011 | 27199 | 1385.74 | 7.1914   | 1 K.FQNFAQI chr2@2226    | 6.65E-11 | 0.001761 |
| 11Nov2011 | 537   | 1000.59 | 27.93569 | 1 R.KNKEQQI Splice@chr   | 4.38E-10 | 0.007221 |
| 11Nov2011 | 538   | 890.47  | -8.65343 | 1 R.SSTPQLTI Splice@chr  | 3.48E-10 | 0.005891 |
| 11Nov2011 | 30914 | 1027.59 | -24.0001 | 2 I.KNELKSKA chrX@6127   | 2.48E-10 | 0.004563 |
| 11Nov2011 | 20987 | 833.42  | -19.2103 | 2 _LIEPYVAM Splice@chr   | 6.20E-10 | 0.00985  |
| 11Nov2011 | 29352 | 1211.58 | -14.5203 | 2 K.IRQWRRR Splice@chr   | 4.85E-10 | 0.008036 |
| 11Nov2011 | 28553 | 1135.06 | 15.50052 | 2 _DMDYAFI Splice@chr    | 2.29E-10 | 0.004251 |
| 11Nov2011 | 10681 | 1089.65 | -29.1532 | 1 K.KLKSMKN chr5@3701    | 4.06E-11 | 0.001018 |
| 11Nov2011 | 26536 | 665.37  | -26.6417 | 2 Q.INNK+14 Splice@chr   | 4.90E-10 | 0.008081 |
| 11Nov2011 | 469   | 722.35  | 3.723    | 1 R.FQGGGEI chr1@2595    | 3.42E-10 | 0.005734 |
| 11Nov2011 | 34431 | 1277.67 | 3.563978 | 2 R.DGSWWIL chr4@4362    | 5.39E-10 | 0.008686 |
| 11Nov2011 | 18418 | 894.41  | 13.57006 | 2 _FSDDDVT Splice@chr    | 5.71E-10 | 0.009246 |
| 11Nov2011 | 29637 | 1105.54 | 20.81581 | 2 I.IEGHMGK Splice@chr   | 4.04E-10 | 0.007084 |
| 11Nov2011 | 5630  | 433.76  | 2.609238 | 2 _IVDLPGPI chr3@1104    | 8.66E-11 | 0.002506 |
| 11Nov2011 | 7313  | 463.77  | 1.18704  | 2 K.PVNIENLI chrX@1210   | 7.60E-11 | 0.002289 |
| 11Nov2011 | 21799 | 849.93  | 18.38221 | 2 Q.DSSYFVE Splice@chr   | 6.87E-11 | 0.002108 |
| 11Nov2011 | 2927  | 731.41  | 21.89419 | 2 R.EELDSISL chr4@7427   | 2.96E-10 | 0.004783 |
| 11Nov2011 | 10368 | 559.79  | 11.35993 | 2 R.DGWSIGI chr4@4253    | 1.25E-10 | 0.002782 |
| 11Nov2011 | 8742  | 434.24  | 13.9946  | 3 _RSNDQTI chr5@6378     | 2.05E-10 | 0.003611 |
| 11Nov2011 | 842   | 845.48  | 28.26075 | 1 R.FAVYFAK chr1@8163    | 4.82E-10 | 0.007679 |

|           |       |         |          |                         |          |          |
|-----------|-------|---------|----------|-------------------------|----------|----------|
| 11Nov2011 | 26280 | 890.44  | 14.86661 | 2 K.GWSVPLI Splice@chr  | 2.12E-10 | 0.003726 |
| 11Nov2011 | 5363  | 948.48  | 18.96187 | 1 R.ENKENW chr3@9915    | 4.51E-10 | 0.00746  |
| 11Nov2011 | 23678 | 853.45  | -23.3178 | 2 K.NFKINSK chr4@5815   | 5.72E-10 | 0.009435 |
| 11Nov2011 | 22068 | 549.3   | 19.70379 | 2 R.FDVIFNV chrX@5111   | 1.27E-10 | 0.002836 |
| 11Nov2011 | 7348  | 553.78  | -25.7264 | 2 _SSLDKESC chr5@1235   | 4.17E-10 | 0.00709  |
| 11Nov2011 | 9340  | 673.33  | 11.76686 | 2 R.QEM+15. chr3@1026   | 4.06E-10 | 0.00709  |
| 11Nov2011 | 15296 | 943.58  | 7.576255 | 1 K.GSK+14.C chrX@1205  | 4.16E-10 | 0.00709  |
| 11Nov2011 | 31394 | 1114.09 | -18.2942 | 2 _TVLQTAC chr5@1395    | 4.81E-10 | 0.007565 |
| 11Nov2011 | 11008 | 724.35  | 19.12636 | 3 V.CLTEEGK Splice@chr  | 2.34E-10 | 0.004072 |
| 11Nov2011 | 20494 | 833.93  | -9.2006  | 2 _IIEPYVAV Splice@chr  | 1.22E-11 | 4.16E-04 |
| 11Nov2011 | 26566 | 855.48  | -6.07153 | 2 K.IFTQTK+1 Splice@chr | 2.59E-10 | 0.004289 |
| 11Nov2011 | 6949  | 716.4   | 8.019867 | 1 K.LAANAEK chr5@1335   | 3.58E-10 | 0.006212 |
| 11Nov2011 | 11420 | 975.56  | -2.75567 | 1 K.LPKLDAYI chr4@1145  | 1.06E-10 | 0.002686 |
| 11Nov2011 | 26334 | 1385.75 | 14.42536 | 1 K.FQNFAQI chr2@2226   | 1.22E-10 | 0.002782 |
| 11Nov2011 | 9564  | 868.42  | -0.63154 | 1 K.SSSGSLSS chr2@1132  | 4.17E-10 | 0.00709  |
| 11Nov2011 | 5962  | 876.41  | -8.50606 | 1 K.TEDEARR chrX@1138   | 3.81E-10 | 0.006769 |
| 11Nov2011 | 7181  | 553.78  | -10.2208 | 2 R.TASQK+1 chrX@5438   | 3.60E-10 | 0.006325 |
| 11Nov2011 | 24439 | 831.45  | -1.72693 | 2 R.NTRNQLF chrX@7297   | 3.78E-11 | 0.001188 |
| 11Nov2011 | 30052 | 1000.51 | -15.4866 | 2 E.CLVVNLS Splice@chr  | 1.49E-10 | 0.002933 |
| 11Nov2011 | 19521 | 685.88  | 4.188613 | 2 K.IVPGGGA chrX@1570   | 4.65E-17 | 0        |
| 11Nov2011 | 255   | 819.42  | 5.602837 | 1 _KNEGASC chr1@1181    | 2.36E-10 | 0.004131 |
| 11Nov2011 | 24418 | 521.3   | 24.95499 | 2 R.NLNEVEII chr4@1305  | 4.31E-10 | 0.007255 |
| 11Nov2011 | 25656 | 889.95  | -19.8868 | 2 K.RSSVHTE chr2@8442   | 4.80E-10 | 0.007565 |
| 11Nov2011 | 7130  | 519.6   | -26.5197 | 3 K.IGSM+15 chr5@1654   | 4.43E-11 | 0.001505 |
| 11Nov2011 | 9860  | 752.88  | -14.2545 | 2 R.GKCNGG chr4@5126    | 5.88E-10 | 0.009587 |
| 11Nov2011 | 27954 | 957.5   | 22.57714 | 3 K.LFQVLQN Splice@chr  | 2.41E-10 | 0.004235 |
| 11Nov2011 | 7526  | 875.49  | 11.27984 | 2 K.KIILM+15 chr4@5840  | 4.96E-10 | 0.007779 |
| 11Nov2011 | 10173 | 1161.66 | -19.4191 | 1 K.NSKDKLV Splice@chr  | 2.57E-10 | 0.004289 |
| 11Nov2011 | 24378 | 831.45  | -1.72693 | 2 R.NTRNQLF chrX@7297   | 3.93E-10 | 0.006823 |
| 11Nov2011 | 18422 | 719.39  | 28.86707 | 2 R.FTQAGSE Splice@chr  | 3.42E-12 | 0        |
| 11Nov2011 | 1499  | 632.78  | -25.4076 | 2 _KM+15.9 Splice@chr   | 1.95E-10 | 0.003611 |
| 11Nov2011 | 29308 | 1272.27 | 19.16254 | 3 K.FAVADEE Splice@chr  | 1.87E-13 | 0        |
| 11Nov2011 | 676   | 552.3   | 10.18569 | 2 R.TQNATAI Splice@chr  | 2.64E-11 | 5.38E-04 |
| 11Nov2011 | 4078  | 1059.54 | -17.6437 | 1 _YDHKNAI chr5@1738    | 9.77E-11 | 0.002506 |
| 11Nov2011 | 15612 | 749.39  | -17.0141 | 2 _RLQHAN Splice@chr    | 1.28E-11 | 4.16E-04 |
| 11Nov2011 | 17392 | 893.91  | 15.44868 | 2 _FSDDDVT Splice@chr   | 1.84E-10 | 0.003329 |
| 11Nov2011 | 4962  | 833.46  | -4.25508 | 1 R.DMVQLV chrX@9811    | 3.09E-10 | 0.005015 |
| 11Nov2011 | 29724 | 786.92  | 22.65468 | 2 K.ERSNFSKI Splice@chr | 3.20E-10 | 0.005239 |
| 11Nov2011 | 361   | 722.35  | 3.723    | 1 R.FQGGGEI chr1@2595   | 4.52E-10 | 0.00746  |
| 11Nov2011 | 16442 | 671.37  | -24.0361 | 2 T.FNIVHTQ Splice@chr  | 3.31E-10 | 0.005524 |
| 11Nov2011 | 6203  | 849.72  | 10.96034 | 3 L.EDESAAV Splice@chr  | 2.89E-10 | 0.004616 |
| 11Nov2011 | 14492 | 1345.63 | -24.7692 | 2 _QVREMH Splice@chr    | 1.94E-10 | 0.003611 |
| 11Nov2011 | 11516 | 724.35  | 19.12636 | 3 V.CLTEEGK Splice@chr  | 6.97E-12 | 1.43E-04 |
| 11Nov2011 | 16377 | 671.37  | -24.0361 | 2 T.FNIVHTQ Splice@chr  | 3.92E-10 | 0.006823 |
| 11Nov2011 | 28726 | 741.88  | -12.6527 | 2 K.KIFLQM+ chr2@1507   | 1.43E-10 | 0.002933 |
| 11Nov2011 | 6389  | 741.38  | -23.1647 | 2 K.FPENRHI chr2@1477   | 2.80E-10 | 0.004616 |
| 11Nov2011 | 18311 | 719.39  | 28.86707 | 2 R.FTQAGSE Splice@chr  | 3.92E-13 | 0        |

|           |       |         |          |                          |          |          |
|-----------|-------|---------|----------|--------------------------|----------|----------|
| 11Nov2011 | 28684 | 741.88  | -12.6527 | 2 K.KIFLQM+ chr2@1507    | 2.81E-10 | 0.004616 |
| 11Nov2011 | 426   | 1000.59 | 27.93569 | 1 R.KNKEQQI Splice@chr   | 4.59E-10 | 0.00746  |
| 11Nov2011 | 10712 | 1064.59 | 7.411911 | 1 K.YLINGNEI chr1@8687   | 6.15E-11 | 0.00199  |
| 11Nov2011 | 27637 | 1104.2  | 18.40556 | 2 K.ILFRAYLG chr5@1865   | 2.76E-10 | 0.00457  |
| 11Nov2011 | 20437 | 833.43  | -7.18554 | 2 _..IIEPYVAM Splice@chr | 3.23E-10 | 0.005294 |
| 11Nov2011 | 26627 | 1003.19 | 17.13413 | 3 R.CWNRRA Splice@chr    | 5.93E-12 | 1.43E-04 |
| 11Nov2011 | 26681 | 1003.52 | 12.6889  | 3 R.CWNRRA Splice@chr    | 1.21E-13 | 0        |
| 11Nov2011 | 3938  | 928.48  | 5.067247 | 1 K.FRSHPER chr5@3821    | 3.77E-10 | 0.006664 |
| 11Nov2011 | 12989 | 565.83  | 14.11658 | 2 R.ISLTNANI chr5@7795   | 2.14E-10 | 0.003726 |
| 11Nov2011 | 23553 | 853.45  | -23.3178 | 2 K.NFKINSK chr4@5819    | 5.09E-10 | 0.008172 |
| 11Nov2011 | 7032  | 514.31  | -21.8382 | 2 R.KTVVLQC chrX@1237    | 2.50E-10 | 0.004235 |
| 11Nov2011 | 22782 | 1275.6  | -25.4649 | 3 R.YSSECPE Splice@chr   | 6.33E-11 | 0.002047 |
| 11Nov2011 | 29694 | 1027.6  | -14.245  | 2 I.KNELKSKA chrX@6127   | 2.58E-10 | 0.004289 |
| 11Nov2011 | 1161  | 632.78  | -25.4076 | 2 _..KM+15.9 Splice@chr  | 2.69E-10 | 0.004396 |
| 11Nov2011 | 20506 | 774.96  | 16.29715 | 2 E.DILFVINK Splice@chr  | 7.77E-12 | 1.43E-04 |
| 11Nov2011 | 23745 | 1061.57 | -13.5816 | 2 S.FAK+14.0 chr5@2472   | 1.95E-10 | 0.003611 |
| 11Nov2011 | 551   | 703.38  | -2.78167 | 1 _..DAAGLAC chr3@2528   | 1.02E-11 | 3.52E-04 |
| 11Nov2011 | 19581 | 685.88  | 4.188613 | 2 K.IVPGGGA chrX@1570    | 1.65E-15 | 0        |
| 11Nov2011 | 10596 | 566.31  | 21.45326 | 2 R.EVAQLEC chr5@1706    | 9.29E-11 | 0.002506 |
| 11Nov2011 | 11122 | 821.44  | 15.92055 | 1 K.TGFGING chrX@2647    | 2.00E-10 | 0.003611 |
| 11Nov2011 | 24793 | 1216.59 | -11.6275 | 2 L.RNTRNDI chr4@1012    | 2.88E-10 | 0.004616 |
| 11Nov2011 | 22540 | 784.93  | -12.0354 | 2 K.M+15.99 chr1@2456    | 3.99E-10 | 0.006989 |
| 11Nov2011 | 2938  | 485.29  | -1.00826 | 2 R.IKDVEIPR chr2@9251   | 7.84E-11 | 0.002348 |
| 11Nov2011 | 26372 | 1384.75 | 16.84983 | 1 K.FQNFQAI chr2@2226    | 2.98E-10 | 0.004783 |
| 11Nov2011 | 13768 | 1094.59 | 6.538024 | 1 R.FEWITKN chr2@6136    | 1.49E-10 | 0.002933 |
| 11Nov2011 | 645   | 552.3   | 10.18569 | 2 R.TQNATAI Splice@chr   | 4.10E-11 | 0.001442 |
| 11Nov2011 | 17451 | 893.91  | 15.44868 | 2 _..FSDDDVT Splice@chr  | 4.40E-10 | 0.00746  |
| 11Nov2011 | 6232  | 604.31  | 24.98924 | 2 K.ERDRYSP chr5@7314    | 3.22E-10 | 0.005294 |
| 11Nov2011 | 7275  | 1107.57 | -12.7508 | 1 _..SSLDKESC chr5@1239  | 2.61E-11 | 5.38E-04 |
| 11Nov2011 | 11461 | 724.35  | 19.12636 | 3 V.CLTEEGK Splice@chr   | 2.64E-11 | 5.38E-04 |
| 11Nov2011 | 3727  | 457.25  | 19.59886 | 2 R.QANAVG chr5@1745     | 1.90E-10 | 0.003509 |
| 11Nov2011 | 12935 | 565.83  | 14.11658 | 2 R.ISLTNANI chr5@7795   | 4.74E-10 | 0.007565 |
| 11Nov2011 | 18995 | 687.41  | 21.43028 | 2 E.M+15.99 chr2@8546    | 2.62E-10 | 0.00434  |
| 11Nov2011 | 6337  | 741.38  | -23.1647 | 2 K.FPENRHI chr2@1477    | 1.12E-10 | 0.002736 |
| 11Nov2011 | 19049 | 687.41  | 21.43028 | 2 E.M+15.99 chr2@8546    | 1.92E-10 | 0.003565 |
| 11Nov2011 | 16559 | 671.37  | -24.0361 | 2 T.FNIVHTQ Splice@chr   | 4.27E-10 | 0.0072   |
| 11Nov2011 | 18362 | 719.39  | 28.86707 | 2 R.FTQAGSE Splice@chr   | 2.06E-13 | 0        |
| 11Nov2011 | 28033 | 957.5   | 1.956888 | 3 R.FIEPIEDIF Splice@chr | 3.14E-10 | 0.00507  |
| 11Nov2011 | 10131 | 904.5   | -11.4166 | 1 R.DITLSSLR chr3@2830   | 5.82E-10 | 0.009541 |
| 11Nov2011 | 27741 | 1135.56 | 14.02138 | 2 _..DMDYAF Splice@chr   | 7.28E-11 | 0.00223  |
| 11Nov2011 | 29446 | 1216.59 | -11.6275 | 2 L.RNTRNDI chr4@1012    | 3.53E-10 | 0.006041 |
| 11Nov2011 | 21851 | 849.93  | 18.38221 | 2 Q.DSSYFVE Splice@chr   | 6.09E-12 | 1.43E-04 |
| 11Nov2011 | 27996 | 914.48  | -9.75514 | 2 K.HRCHKNI chr2@1129    | 1.25E-10 | 0.002782 |
| 11Nov2011 | 10766 | 1064.59 | 7.411911 | 1 K.YLINGNEI chr1@8687   | 2.92E-11 | 7.37E-04 |
| 11Nov2011 | 17229 | 1090.64 | 2.300686 | 1 L.SLIILAM+ Splice@chr  | 5.97E-10 | 0.009868 |
| 11Nov2011 | 7365  | 463.77  | 1.18704  | 2 K.PVNIENLI chrX@1210   | 1.24E-10 | 0.002782 |
| 11Nov2011 | 31816 | 753.05  | -28.7684 | 3 R.GFMVML Splice@chr    | 7.34E-11 | 0.002289 |

|           |       |         |          |                          |          |          |
|-----------|-------|---------|----------|--------------------------|----------|----------|
| 11Nov2011 | 7496  | 546.78  | -19.0827 | 2 K.ETETGITC chr4@1221   | 2.44E-10 | 0.004235 |
| 11Nov2011 | 8431  | 496.28  | -16.7598 | 2 _..VIHTGSH chr1@3537   | 2.06E-10 | 0.003611 |
| 11Nov2011 | 25775 | 665.37  | -26.6417 | 2 Q.INNK+14 Splice@chr   | 5.20E-10 | 0.008274 |
| 11Nov2011 | 544   | 702.38  | 2.001521 | 1 _..DAAGLAC chr3@2528   | 5.12E-12 | 1.43E-04 |
| 11Nov2011 | 31024 | 1147.25 | 13.44098 | 3 R.FQSAAIG Splice@chr   | 4.28E-15 | 0        |
| 11Nov2011 | 14553 | 1345.63 | -24.7692 | 2 _..QVREMH Splice@chr   | 5.43E-11 | 0.001809 |
| 11Nov2011 | 863   | 722.35  | 3.723    | 1 R.FQGGGEI chr1@2595    | 3.33E-10 | 0.005581 |
| 11Nov2011 | 10755 | 1063.58 | 1.14882  | 1 K.YLINGNEI chr1@8687   | 3.34E-10 | 0.005698 |
| 11Nov2011 | 17897 | 894.41  | 13.57006 | 2 _..FDSDDVT Splice@chr  | 1.31E-11 | 4.16E-04 |
| 11Nov2011 | 4354  | 934.47  | 6.996328 | 1 _..EYQPELR Splice@chr  | 4.14E-10 | 0.00709  |
| 11Nov2011 | 3872  | 412.23  | 25.3069  | 2 R.IASYQGG chrX@1679    | 1.60E-10 | 0.002986 |
| 11Nov2011 | 31533 | 798.4   | 12.60083 | 2 K.VHLVYFN chr5@7770    | 3.93E-10 | 0.006823 |
| 11Nov2011 | 19945 | 664.7   | 1.197202 | 3 _..PTLNK+1. chr1@6526  | 1.48E-10 | 0.002933 |
| 11Nov2011 | 703   | 556.31  | 12.70857 | 2 K.KNAEFFLI chr1@9699   | 5.81E-10 | 0.009541 |
| 11Nov2011 | 22394 | 760.71  | 5.279012 | 3 R.RAINGTE Splice@chr   | 2.83E-10 | 0.004987 |
| 11Nov2011 | 6062  | 741.38  | -23.1647 | 2 K.FPENRHI chr2@1477    | 1.63E-10 | 0.003059 |
| 11Nov2011 | 10124 | 559.79  | 11.35993 | 2 R.DGWSIG chr4@4253     | 1.05E-10 | 0.002479 |
| 11Nov2011 | 9595  | 1025.61 | -11.6755 | 1 K.LGLGSL chr5@4945     | 5.53E-12 | 1.44E-04 |
| 11Nov2011 | 9733  | 559.79  | 11.35993 | 2 R.DGWSIG chr4@4253     | 2.37E-10 | 0.004418 |
| 11Nov2011 | 24384 | 894.99  | -22.1883 | 2 K.M+15.99 chrX@1449    | 2.75E-10 | 0.004928 |
| 11Nov2011 | 3560  | 412.23  | 25.3069  | 2 R.IASYQGG chrX@1679    | 2.75E-10 | 0.004928 |
| 11Nov2011 | 17221 | 1288.7  | -18.58   | 2 K.TKKQKKK chrX@6244    | 3.62E-10 | 0.006066 |
| 11Nov2011 | 24137 | 831.45  | -14.4052 | 2 K.PM+15.9 chr3@1124    | 1.21E-10 | 0.002595 |
| 11Nov2011 | 9650  | 1025.61 | -11.6755 | 1 K.LGLGSL chr5@4945     | 4.76E-12 | 7.50E-05 |
| 11Nov2011 | 6385  | 471.79  | -5.7044  | 2 K.IKVNFPPI chr2@3034   | 4.46E-10 | 0.007484 |
| 11Nov2011 | 27654 | 957.49  | -8.50821 | 3 R.FIEPIEDIF Splice@chr | 3.09E-10 | 0.00521  |
| 11Nov2011 | 29603 | 1027.59 | -24.0001 | 2 I.KNELSKA chrX@6127    | 4.38E-10 | 0.007383 |
| 11Nov2011 | 29242 | 1272.28 | 27.03865 | 3 K.FAFADEE Splice@chr   | 9.53E-12 | 1.44E-04 |
| 11Nov2011 | 5657  | 876.4   | -19.8707 | 1 K.TEDEARR chrX@1138    | 4.26E-11 | 0.001193 |
| 11Nov2011 | 10419 | 1064.58 | -2.00842 | 1 K.YLINGNEI chr1@8687   | 1.21E-10 | 0.002595 |
| 11Nov2011 | 16294 | 1106.58 | 8.124787 | 1 K.NLVCKQE chr5@1606    | 2.62E-10 | 0.004873 |
| 11Nov2011 | 19625 | 664.7   | 1.197202 | 3 _..PTLNK+1. chr1@6526  | 2.68E-10 | 0.004873 |
| 11Nov2011 | 23301 | 853.45  | -23.3178 | 2 K.NFKINSKI chr4@5819   | 5.54E-10 | 0.009588 |
| 11Nov2011 | 31346 | 921.46  | -23.319  | 2 P.SNIPK+14 chr2@1297   | 2.92E-10 | 0.005093 |
| 11Nov2011 | 9152  | 868.42  | -0.63154 | 1 K.SSSGSLSS chr2@1132   | 2.14E-10 | 0.003938 |
| 11Nov2011 | 17209 | 924.9   | -24.4218 | 2 Q.KPDDISN Splice@chr   | 3.67E-10 | 0.00618  |
| 11Nov2011 | 8436  | 537.31  | -25.9128 | 2 _..ILENQKIS chr2@4228  | 5.49E-10 | 0.009474 |
| 11Nov2011 | 15253 | 749.41  | 9.672154 | 2 _..RLLQHAN Splice@chr  | 1.14E-10 | 0.002539 |
| 11Nov2011 | 5948  | 604.31  | 24.98924 | 2 K.ERDRYSP chr5@7314    | 4.99E-10 | 0.008213 |
| 11Nov2011 | 31771 | 1026.49 | -2.11289 | 2 E.FDFLIQLC Splice@chr  | 2.14E-10 | 0.003938 |
| 11Nov2011 | 9880  | 1161.66 | -19.4191 | 1 K.NSKDKLV Splice@chr   | 1.35E-10 | 0.00271  |
| 11Nov2011 | 3813  | 1059.53 | -27.0998 | 1 _..YDHKNAI chr5@1738   | 5.99E-11 | 0.001502 |
| 11Nov2011 | 27695 | 957.49  | -8.50821 | 3 R.FIEPIEDIF Splice@chr | 5.77E-10 | 0.009795 |
| 11Nov2011 | 29627 | 786.92  | 22.65468 | 2 K.ERSNFSKI Splice@chr  | 4.50E-10 | 0.007484 |
| 11Nov2011 | 29626 | 1075.02 | 8.557851 | 2 R.FK+14.01 Splice@chr  | 1.53E-10 | 0.002945 |
| 11Nov2011 | 5237  | 537.79  | -24.2187 | 2 K.DQGMLN chr5@2023     | 4.34E-10 | 0.007383 |
| 11Nov2011 | 9801  | 677.34  | -8.57314 | 2 K.MQQFST chr5@2080     | 2.77E-10 | 0.004928 |

|           |       |         |          |                          |          |          |
|-----------|-------|---------|----------|--------------------------|----------|----------|
| 11Nov2011 | 18920 | 599.28  | -28.7398 | 2 K.LCSTADT chrX@1481    | 1.80E-10 | 0.003417 |
| 11Nov2011 | 21460 | 849.92  | 6.583873 | 2 Q.DSSYFVE Splice@chr   | 2.83E-13 | 0        |
| 11Nov2011 | 10472 | 1064.58 | -2.00842 | 1 K.YLINGNEI chr1@8687   | 3.91E-11 | 0.001138 |
| 11Nov2011 | 10471 | 1063.58 | 1.14882  | 1 K.YLINGNEI chr1@8687   | 3.18E-10 | 0.005381 |
| 11Nov2011 | 30175 | 1376.97 | 5.086429 | 3 P.PM+15.9 Splice@chr   | 4.16E-10 | 0.007043 |
| 11Nov2011 | 19654 | 682.88  | -29.0653 | 2 K.RIAQVSK chr4@1486    | 2.74E-10 | 0.004873 |
| 11Nov2011 | 5327  | 433.76  | 2.609238 | 2 _IVDLPGPI chr3@1104    | 1.97E-10 | 0.003646 |
| 11Nov2011 | 6285  | 936.48  | 27.86052 | 1 K.LNGGYEC chr2@1191    | 3.65E-11 | 0.001072 |
| 11Nov2011 | 10071 | 559.79  | 11.35993 | 2 R.DGWSIG chr4@4255     | 5.59E-11 | 0.001315 |
| 11Nov2011 | 27738 | 957.49  | -8.50821 | 3 R.FIEPIEDIF Splice@chr | 1.05E-10 | 0.002479 |
| 11Nov2011 | 6898  | 553.78  | -10.2208 | 2 R.TASQK+1 chrX@5438    | 3.66E-10 | 0.00618  |
| 11Nov2011 | 17896 | 923.02  | 9.903217 | 2 R.TLNNLKV chr2@1060    | 5.18E-10 | 0.008612 |
| 11Nov2011 | 11106 | 975.55  | -13.0268 | 1 K.LPKLDAYI chr4@1149   | 5.93E-11 | 0.001502 |
| 11Nov2011 | 18081 | 719.38  | 14.92317 | 2 R.FTQAGSE Splice@chr   | 4.37E-13 | 0        |
| 11Nov2011 | 29989 | 1000.5  | -25.5062 | 2 E.CLVVNLS Splice@chr   | 1.03E-10 | 0.002479 |
| 11Nov2011 | 21501 | 1056.89 | 23.76658 | 3 I.SRVEDDS Splice@chr   | 4.47E-15 | 0        |
| 11Nov2011 | 12725 | 565.83  | 14.11658 | 2 R.ISLTNANI chr5@7795   | 4.92E-10 | 0.007985 |
| 11Nov2011 | 29911 | 911.42  | 20.49399 | 2 _PRM+15. Splice@chr    | 8.19E-11 | 0.001873 |
| 11Nov2011 | 17966 | 719.38  | 14.92317 | 2 R.FTQAGSE Splice@chr   | 1.89E-13 | 0        |
| 11Nov2011 | 1946  | 444.25  | -3.23598 | 2 R.AELSSRPI chr3@8104   | 2.09E-10 | 0.003885 |
| 11Nov2011 | 27836 | 980.05  | -22.3594 | 2 K.K+14.016 chrX@3807   | 3.27E-10 | 0.00561  |
| 11Nov2011 | 10412 | 1063.58 | 1.14882  | 1 K.YLINGNEI chr1@8687   | 2.15E-10 | 0.003938 |
| 11Nov2011 | 29162 | 791.9   | -17.5179 | 4 K.SGTIFDNI Splice@chr  | 3.36E-19 | 0        |
| 11Nov2011 | 10338 | 566.31  | 21.45326 | 2 R.EVAQLEC chr5@1706    | 3.55E-11 | 0.001009 |
| 11Nov2011 | 400   | 722.34  | -10.069  | 1 R.FQGGGEI chr1@2595    | 4.51E-10 | 0.007484 |
| 11Nov2011 | 6959  | 1107.56 | -21.6943 | 1 _SSLDKESC chr5@1239    | 5.97E-11 | 0.001502 |
| 11Nov2011 | 10284 | 566.31  | 21.45326 | 2 R.EVAQLEC chr5@1706    | 1.20E-10 | 0.002595 |
| 11Nov2011 | 31520 | 797.4   | -20.7689 | 2 R.VHIMK+1 chr1@8379    | 8.65E-11 | 0.002061 |
| 11Nov2011 | 29287 | 954.46  | 24.98958 | 4 K.FAVADEE Splice@chr   | 3.75E-14 | 0        |
| 11Nov2011 | 29280 | 1272.28 | 27.03865 | 3 K.FAVADEE Splice@chr   | 2.94E-14 | 0        |
| 11Nov2011 | 3380  | 457.25  | 19.59886 | 2 R.QANAVG chr5@1745     | 5.00E-10 | 0.008213 |
| 11Nov2011 | 15268 | 662.86  | 7.984656 | 2 S.INM+15.5 chr4@2551   | 5.47E-10 | 0.009358 |
| 11Nov2011 | 25910 | 746.38  | 17.50532 | 3 R.IFDTNNK chr4@1514    | 2.78E-11 | 6.80E-04 |
| 11Nov2011 | 11057 | 976.56  | -6.19805 | 1 K.LPKLDAYI chr4@1149   | 4.85E-10 | 0.007872 |
| 11Nov2011 | 5610  | 685.37  | -27.0225 | 2 K.ISTQTHIC chr4@7638   | 4.31E-10 | 0.007212 |
| 11Nov2011 | 29014 | 1074.06 | 9.442161 | 2 K.YFKINILEI chr2@1186  | 1.23E-10 | 0.002595 |
| 11Nov2011 | 2073  | 419.24  | -26.3651 | 3 K.TKNLHSLI chrX@8666   | 8.40E-11 | 0.002    |
| 11Nov2011 | 12331 | 625.82  | -20.2839 | 2 R.K+14.016 chrX@1356   | 3.19E-10 | 0.005381 |
| 11Nov2011 | 19165 | 685.88  | 4.188613 | 2 K.IVPGGGA chrX@1570    | 9.06E-19 | 0        |
| 11Nov2011 | 22472 | 804.9   | 13.41057 | 2 _LTMTWN chr1@4515      | 4.05E-10 | 0.006873 |
| 11Nov2011 | 5712  | 876.4   | -19.8707 | 1 K.TEDEARR chrX@1138    | 2.74E-10 | 0.004873 |
| 11Nov2011 | 24407 | 1216.58 | -19.8654 | 2 L.RNTRNDI chr4@1012    | 3.81E-10 | 0.00635  |
| 11Nov2011 | 9026  | 673.32  | -3.13278 | 2 R.QEM+15. chr3@1026    | 5.26E-11 | 0.001251 |
| 11Nov2011 | 28478 | 741.87  | -26.1725 | 2 K.KIFLQM+ chr2@1507    | 9.90E-11 | 0.002301 |
| 11Nov2011 | 12619 | 565.83  | 14.11658 | 2 R.ISLTNANI chr5@7795   | 4.90E-10 | 0.007985 |
| 11Nov2011 | 6872  | 793.42  | 19.33353 | 2 R.NEKYSTM Splice@chr   | 5.09E-10 | 0.008383 |
| 11Nov2011 | 6119  | 741.38  | -23.1647 | 2 K.FPENRHI chr2@1477    | 1.59E-10 | 0.003059 |

|           |       |         |          |                          |          |          |
|-----------|-------|---------|----------|--------------------------|----------|----------|
| 11Nov2011 | 3855  | 473.76  | -9.231   | 2 R.TSGALSL chr1@2011    | 4.01E-10 | 0.006873 |
| 11Nov2011 | 18019 | 719.38  | 14.92317 | 2 R.FTQAGSE Splice@chr   | 2.26E-13 | 0        |
| 11Nov2011 | 2783  | 559.32  | -14.3208 | 2 K.SRNFAQKII chr5@1787  | 4.01E-11 | 0.001193 |
| 11Nov2011 | 10999 | 975.55  | -13.0268 | 1 K.LPKLDAYI chr4@1149   | 1.06E-10 | 0.002479 |
| 11Nov2011 | 19225 | 685.88  | 4.188613 | 2 K.IVPGGGA chrX@1570    | 6.42E-15 | 0        |
| 11Nov2011 | 6227  | 936.48  | 27.86052 | 1 K.LNGGYEC chr2@1191    | 1.87E-10 | 0.003467 |
| 11Nov2011 | 26325 | 1384.74 | 9.615872 | 1 K.FQNFAQI chr2@2226    | 4.46E-10 | 0.007484 |
| 11Nov2011 | 14208 | 897.42  | -27.6753 | 3 _QVREMH Splice@chr     | 2.16E-10 | 0.003938 |
| 11Nov2011 | 24473 | 1216.58 | -19.8654 | 2 L.RNTRNDI chr4@1012    | 1.59E-10 | 0.003059 |
| 11Nov2011 | 461   | 1000.59 | 27.93569 | 1 R.KNKEQQI Splice@chr   | 4.51E-10 | 0.007484 |
| 11Nov2011 | 21263 | 971.53  | -6.91774 | 2 R.KKECGDK chr3@1197    | 9.56E-11 | 0.002177 |
| 11Nov2011 | 571   | 702.38  | 2.001521 | 1 _DAAGLAC chr3@2528     | 5.12E-12 | 1.44E-04 |
| 11Nov2011 | 7744  | 957.52  | -17.6751 | 1 R.DGIVGIV Splice@chr   | 4.99E-10 | 0.008213 |
| 11Nov2011 | 12672 | 565.83  | 14.11658 | 2 R.ISLTNANI chr5@7793   | 3.93E-10 | 0.00676  |
| 11Nov2011 | 26176 | 798.15  | -11.5616 | 4 K.SGDAGIV Splice@chr   | 2.78E-10 | 0.004928 |
| 11Nov2011 | 7055  | 463.77  | 1.18704  | 2 K.PVNIENLI chrX@1210   | 7.61E-11 | 0.001749 |
| 11Nov2011 | 28223 | 1212.08 | -15.9059 | 2 K.IRQWRRR Splice@chr   | 9.35E-11 | 0.002177 |
| 11Nov2011 | 16687 | 1111.1  | -11.1063 | 2 R.LLM+15.5 chr4@3284   | 3.14E-10 | 0.005324 |
| 11Nov2011 | 20141 | 833.92  | -21.2254 | 2 _IIEPYVAV Splice@chr   | 3.23E-11 | 8.10E-04 |
| 11Nov2011 | 2871  | 439.73  | -4.03447 | 2 R.SIAMFGP chr2@4157    | 2.87E-10 | 0.00504  |
| 11Nov2011 | 8412  | 434.24  | 13.9946  | 3 _RSNDQTI chr5@6378     | 2.71E-10 | 0.004873 |
| 11Nov2011 | 8411  | 407.7   | 9.830142 | 2 R.YEMMIK chr3@1222     | 5.92E-10 | 0.009964 |
| 11Nov2011 | 5683  | 1274.07 | 6.16406  | 2 L.EDESAAV Splice@chr   | 4.91E-10 | 0.007985 |
| 11Nov2011 | 19561 | 816.94  | -8.15359 | 2 G.KSLANNI Splice@chr   | 1.95E-10 | 0.003588 |
| 11Nov2011 | 4760  | 921.52  | 19.51785 | 1 R.MRITNAS chrX@1004    | 2.74E-10 | 0.004873 |
| 11Nov2011 | 19968 | 1058.97 | -25.0194 | 2 F.QKFYSFQ chr2@4922    | 4.47E-11 | 0.001193 |
| 11Nov2011 | 26229 | 1384.74 | 9.615872 | 1 K.FQNFAQI chr2@2226    | 2.55E-10 | 0.004643 |
| 11Nov2011 | 12266 | 625.82  | -11.1921 | 2 I.QLEDIEFIS Splice@chr | 5.02E-10 | 0.008213 |
| 11Nov2011 | 1948  | 590.32  | 16.74293 | 2 R.NKSLEMI chr2@4802    | 7.60E-11 | 0.001749 |
| 11Nov2011 | 15403 | 1106.58 | 8.124787 | 1 K.NLVCKQE chr5@1606    | 7.56E-11 | 0.002189 |
| 11Nov2011 | 25987 | 980.05  | -22.3594 | 2 K.K+14.016 chrX@3807   | 1.48E-10 | 0.003657 |
| 11Nov2011 | 9188  | 752.88  | -14.2545 | 2 R.GKCNGG chr4@5126     | 3.86E-10 | 0.007258 |
| 11Nov2011 | 2740  | 559.32  | -14.3208 | 2 K.SRNFAQKII chr5@1787  | 1.51E-10 | 0.003657 |
| 11Nov2011 | 25903 | 914.48  | -9.75514 | 2 K.HRCHKNI chr2@1129    | 1.69E-10 | 0.003914 |
| 11Nov2011 | 25900 | 957.5   | 1.956888 | 3 R.FIEPIEDIF Splice@chr | 4.16E-10 | 0.007769 |
| 11Nov2011 | 2928  | 789.44  | -23.0686 | 1 K.ITKGGGT chr1@1213    | 1.21E-10 | 0.003341 |
| 11Nov2011 | 12055 | 1130.64 | 3.300733 | 1 R.ISLTNANI chr5@7793   | 4.14E-10 | 0.007704 |
| 11Nov2011 | 22565 | 831.45  | -1.72693 | 2 R.NTRNQLI chrX@7297    | 3.17E-10 | 0.005973 |
| 11Nov2011 | 380   | 890.47  | -8.65343 | 1 R.SSTPQLTI chrX@1621   | 2.20E-10 | 0.004979 |
| 11Nov2011 | 9102  | 1025.61 | -11.6755 | 1 K.LGLGSGL chr5@4945    | 4.10E-12 | 1.70E-04 |
| 11Nov2011 | 26769 | 968.13  | 18.26018 | 3 _GCSIVPIS Splice@chr   | 1.69E-10 | 0.003914 |
| 11Nov2011 | 18141 | 685.88  | 4.188613 | 2 K.IVPGGGA chrX@1570    | 4.42E-15 | 0        |
| 11Nov2011 | 24493 | 798.15  | -11.5616 | 4 K.SGDAGIV Splice@chr   | 2.96E-10 | 0.005792 |
| 11Nov2011 | 20640 | 1110.04 | -27.8308 | 2 L.LHHHRVL Splice@chr   | 8.87E-11 | 0.002747 |
| 11Nov2011 | 1062  | 503.26  | 2.921613 | 2 K.KNGGEM Splice@chr    | 6.93E-11 | 0.002047 |
| 11Nov2011 | 5797  | 741.38  | -23.1647 | 2 K.FPENRHI chr2@1477    | 2.79E-10 | 0.005541 |
| 11Nov2011 | 8774  | 868.42  | -0.63154 | 1 K.SSSGSLSS chr2@1132   | 4.43E-10 | 0.008343 |

|           |       |         |          |                          |          |          |
|-----------|-------|---------|----------|--------------------------|----------|----------|
| 11Nov2011 | 18024 | 685.88  | 4.188613 | 2 K.IVPGGGA chrX@1570    | 1.72E-15 | 0        |
| 11Nov2011 | 147   | 847.41  | 6.057386 | 1 R.EEAELEK. chr2@4805   | 2.25E-10 | 0.00504  |
| 11Nov2011 | 15512 | 893.98  | 23.35659 | 2 K.CTHLDKT chr5@2031    | 2.43E-10 | 0.005307 |
| 11Nov2011 | 24379 | 1384.74 | 9.615872 | 1 K.FQNFAQI chr2@2226    | 4.86E-10 | 0.009166 |
| 11Nov2011 | 10014 | 1064.58 | -2.00842 | 1 K.YLINGNEI chr1@8687   | 1.47E-10 | 0.003596 |
| 11Nov2011 | 2070  | 858.5   | 1.1427   | 1 _..TVASRAP chrX@7067   | 3.78E-10 | 0.006997 |
| 11Nov2011 | 17035 | 719.38  | 14.92317 | 2 R.FTQAGSE Splice@chr   | 1.95E-13 | 0        |
| 11Nov2011 | 17945 | 599.28  | -28.7398 | 2 K.LCSTADT' chrX@1481   | 5.38E-10 | 0.009911 |
| 11Nov2011 | 9051  | 1025.61 | -11.6755 | 1 K.LGLGSGI chr5@4945    | 2.22E-11 | 8.49E-04 |
| 11Nov2011 | 18471 | 664.7   | 1.197202 | 3 _..PTLNK+1. chr1@6526  | 1.29E-10 | 0.003401 |
| 11Nov2011 | 1602  | 403.23  | 10.8661  | 2 R.AMVASG chr5@1721     | 1.53E-10 | 0.003657 |
| 11Nov2011 | 5849  | 741.38  | -23.1647 | 2 K.FPENRHI, chr2@1477   | 4.64E-10 | 0.008593 |
| 11Nov2011 | 18984 | 833.92  | -21.2254 | 2 _..IIEPYVAM Splice@chr | 4.46E-13 | 0        |
| 11Nov2011 | 9640  | 559.79  | 11.35993 | 2 R.DGWSIGI chr4@4255    | 2.93E-10 | 0.005733 |
| 11Nov2011 | 6608  | 1107.56 | -21.6943 | 1 _..SSLDKESC chr5@1239  | 2.19E-10 | 0.004979 |
| 11Nov2011 | 22668 | 521.3   | 24.95499 | 2 R.NLNEVEII chr4@1305   | 2.95E-10 | 0.005792 |
| 11Nov2011 | 21127 | 804.91  | 25.79416 | 2 _..LTMTWN chr1@4515    | 3.05E-10 | 0.005848 |
| 11Nov2011 | 9948  | 1063.58 | 1.14882  | 1 K.YLINGNEI chr1@8687   | 3.15E-10 | 0.005913 |
| 11Nov2011 | 9947  | 1089.65 | -29.1532 | 1 K.KLKSMKI chr5@3701    | 4.06E-11 | 0.001351 |
| 11Nov2011 | 11570 | 765.38  | -12.3766 | 1 R.SPEHAPK chr5@4294    | 6.91E-11 | 0.002047 |
| 11Nov2011 | 27289 | 1000.51 | -15.4866 | 2 E.CLVVNLS' Splice@chr  | 1.04E-10 | 0.003149 |
| 11Nov2011 | 11629 | 765.38  | -12.3766 | 1 R.SPEHAPK chr5@4294    | 3.24E-10 | 0.006024 |
| 11Nov2011 | 16983 | 719.39  | 28.86707 | 2 R.FTQAGSE Splice@chr   | 2.04E-13 | 0        |
| 11Nov2011 | 3162  | 597.29  | 3.536191 | 2 R.CWNRDK chrX@1392     | 3.63E-10 | 0.006472 |
| 11Nov2011 | 21584 | 843.45  | -16.7082 | 2 K.KMFPEKI chr1@3802    | 1.67E-10 | 0.003861 |
| 11Nov2011 | 6655  | 463.77  | 1.18704  | 2 K.PVNIENLI chrX@1210   | 7.61E-11 | 0.002256 |
| 11Nov2011 | 3701  | 473.77  | 11.87765 | 2 R.TSGALSL' chr1@2011   | 1.98E-10 | 0.004312 |
| 11Nov2011 | 6540  | 553.78  | -10.2208 | 2 R.TASQK+1 chrX@5438    | 3.18E-10 | 0.005973 |
| 11Nov2011 | 16618 | 766.36  | -1.8739  | 2 K.SDGVDV\$ gi 3928951  | 1.86E-11 | 7.06E-04 |
| 11Nov2011 | 11639 | 625.82  | -20.2839 | 2 R.K+14.016 chrX@1356   | 4.79E-10 | 0.009106 |
| 11Nov2011 | 5461  | 876.41  | -8.50606 | 1 K.TEDEARR chrX@1138    | 4.26E-11 | 0.001351 |
| 11Nov2011 | 1031  | 503.26  | 2.921613 | 2 K.KNGGEM chr4@8235     | 6.88E-11 | 0.002047 |
| 11Nov2011 | 24525 | 1385.75 | 14.42536 | 1 K.FQNFAQI chr2@2226    | 6.05E-11 | 0.001978 |
| 11Nov2011 | 27996 | 1147.25 | 13.44098 | 3 R.FQSAAIG Splice@chr   | 6.59E-15 | 0        |
| 11Nov2011 | 9959  | 1064.58 | -2.00842 | 1 K.YLINGNEI chr1@8687   | 6.77E-11 | 0.001978 |
| 11Nov2011 | 27030 | 1015.5  | -19.4324 | 2 R.FMNSSK+ chr2@8237    | 3.85E-10 | 0.007258 |
| 11Nov2011 | 26073 | 876.99  | -11.1881 | 2 V.FPCK+14. chrX@2447   | 2.53E-10 | 0.005419 |
| 11Nov2011 | 20679 | 1092.52 | 5.14448  | 3 K.LDEHFPL' Splice@chr  | 4.15E-10 | 0.007704 |
| 11Nov2011 | 10522 | 976.56  | -6.19805 | 1 K.LPKLDAYI chr4@1149   | 3.30E-10 | 0.006024 |
| 11Nov2011 | 2403  | 888.52  | 29.02223 | 1 R.YNLHTLK Splice@chr   | 5.09E-10 | 0.009473 |
| 11Nov2011 | 9843  | 566.31  | 21.45326 | 2 R.EVAQLEC chr5@1706    | 6.19E-11 | 0.001978 |
| 11Nov2011 | 12092 | 565.83  | 14.11658 | 2 R.ISLTNANI chr5@7795   | 4.72E-10 | 0.008978 |
| 11Nov2011 | 18768 | 1039.54 | -8.43655 | 2 K.YSPNLRA chr4@4065    | 3.33E-10 | 0.006024 |
| 11Nov2011 | 10629 | 976.56  | -6.19805 | 1 K.LPKLDAYI chr4@1149   | 2.42E-10 | 0.005307 |
| 11Nov2011 | 5412  | 876.41  | -8.50606 | 1 K.TEDEARR chrX@1138    | 5.54E-11 | 0.001926 |
| 11Nov2011 | 20279 | 849.93  | 18.38221 | 2 Q.DSSYFVE Splice@chr   | 2.98E-12 | 1.70E-04 |
| 11Nov2011 | 10577 | 862.46  | -8.64381 | 1 _..PIQDVYK Splice@chr  | 4.71E-10 | 0.008853 |

|           |       |         |          |                         |          |          |
|-----------|-------|---------|----------|-------------------------|----------|----------|
| 11Nov2011 | 3491  | 418.89  | -10.5715 | 3 R.ENFATKC chr5@5231   | 2.18E-10 | 0.004979 |
| 11Nov2011 | 320   | 723.35  | -0.92778 | 1 R.FQGGGEI chr1@2595   | 4.61E-10 | 0.008593 |
| 11Nov2011 | 22619 | 831.45  | -1.72693 | 2 R.NTRNQLF chrX@7297   | 4.23E-10 | 0.00796  |
| 11Nov2011 | 23998 | 849.91  | -5.21446 | 2 Q.DSSYFVE Splice@chr  | 2.16E-10 | 0.004979 |
| 11Nov2011 | 9903  | 566.31  | 21.45326 | 2 R.EVAQLEC chr5@1706   | 2.72E-11 | 9.17E-04 |
| 11Nov2011 | 14104 | 943.57  | -2.9787  | 1 _SPLFVPKI chrX@4402   | 2.75E-10 | 0.005478 |
| 11Nov2011 | 23816 | 665.37  | -26.6417 | 2 Q.INNK+14 Splice@chr  | 5.32E-10 | 0.00985  |
| 11Nov2011 | 20206 | 849.92  | 6.583873 | 2 Q.DSSYFVE Splice@chr  | 3.46E-11 | 0.001138 |
| 11Nov2011 | 18079 | 685.88  | 4.188613 | 2 K.IVPGGGA chrX@1570   | 4.53E-19 | 0        |
| 11Nov2011 | 10079 | 1089.65 | -29.1532 | 1 K.KLKSMKN chr5@3701   | 2.51E-10 | 0.005368 |
| 11Nov2011 | 28656 | 1129.08 | -6.57578 | 2 R.K+14.016 chr2@5335  | 9.13E-11 | 0.00281  |
| 11Nov2011 | 25583 | 1104.2  | 18.40556 | 2 K.ILFRAYLG chr5@1865  | 6.84E-11 | 0.002047 |
| 11Nov2011 | 10004 | 1063.58 | 1.14882  | 1 K.YLINGNEI chr1@8687  | 1.15E-10 | 0.003341 |
| 11Nov2011 | 22129 | 969.01  | -11.2595 | 2 Y.QRHVFNI Splice@chr  | 1.47E-10 | 0.003596 |
| 11Nov2011 | 9587  | 559.79  | 11.35993 | 2 R.DGWSIGI chr4@4255   | 5.12E-11 | 0.00171  |
| 11Nov2011 | 12966 | 491.95  | -21.2173 | 3 K.LGFLVMK chr2@1107   | 2.61E-10 | 0.005419 |
| 11Nov2011 | 10077 | 1064.59 | 7.411911 | 1 K.YLINGNEI chr1@8687  | 1.42E-10 | 0.003527 |
| 11Nov2011 | 17092 | 719.38  | 14.92317 | 2 R.FTQAGSE Splice@chr  | 1.12E-13 | 0        |
| 11Nov2011 | 8496  | 507.3   | -7.17287 | 2 K.IVEIDVLG chr5@1932  | 5.27E-10 | 0.009788 |
| 11Nov2011 | 12036 | 565.83  | 14.11658 | 2 R.ISLTNANI chr5@7795  | 4.28E-10 | 0.008024 |
| 11Nov2011 | 7441  | 493.78  | -11.3951 | 2 R.KNQENLI Splice@chr  | 2.57E-10 | 0.007136 |
| 11Nov2011 | 10401 | 625.82  | -20.2839 | 2 R.K+14.016 chrX@1356  | 1.82E-10 | 0.004618 |
| 11Nov2011 | 2726  | 615.8   | -16.0827 | 2 _QLEISFDI Splice@chr  | 1.08E-10 | 0.003034 |
| 11Nov2011 | 13249 | 978.43  | -7.83972 | 2 R.RRCCRCV chr3@6695   | 3.69E-10 | 0.009929 |
| 11Nov2011 | 8129  | 1025.61 | -11.6755 | 1 K.LGLGSGL chr5@4945   | 5.45E-12 | 2.26E-04 |
| 11Nov2011 | 7532  | 752.88  | 24.92213 | 2 R.K+14.016 chr1@3595  | 3.01E-10 | 0.007943 |
| 11Nov2011 | 23660 | 1272.28 | 27.03865 | 3 K.FAVADEE Splice@chr  | 4.86E-16 | 0        |
| 11Nov2011 | 21283 | 1133.58 | -15.1469 | 3 K.HQLVSAF Splice@chr  | 5.12E-14 | 0        |
| 11Nov2011 | 4539  | 537.79  | -24.2187 | 2 K.DQGMLN chr5@2025    | 1.59E-10 | 0.00426  |
| 11Nov2011 | 2655  | 710.86  | 21.23823 | 2 R.DSTQKW chr3@1337    | 3.07E-10 | 0.008308 |
| 11Nov2011 | 9435  | 993.54  | 3.074729 | 1 _SSLFVDC chrX@1374    | 9.77E-11 | 0.002952 |
| 11Nov2011 | 5703  | 626.3   | -9.76097 | 2 R.LCESGAA Splice@chr  | 9.47E-16 | 0        |
| 11Nov2011 | 10056 | 667.34  | -29.5855 | 2 _NFSVSVV chr2@7190    | 1.02E-14 | 0        |
| 11Nov2011 | 21337 | 1133.58 | -15.1469 | 3 K.HQLVSAF Splice@chr  | 7.12E-14 | 0        |
| 11Nov2011 | 9881  | 1000.02 | 11.70688 | 2 R.LVSERYG chr2@8997   | 2.57E-10 | 0.007136 |
| 11Nov2011 | 4901  | 876.4   | -19.8707 | 1 K.TEDEARR chrX@1138   | 1.58E-10 | 0.00426  |
| 11Nov2011 | 10784 | 565.82  | -3.62141 | 2 R.ISLTNANI chr5@7795  | 3.14E-10 | 0.008386 |
| 11Nov2011 | 5129  | 1274.07 | 6.16406  | 2 L.EDESAAV Splice@chr  | 7.99E-11 | 0.00206  |
| 11Nov2011 | 2623  | 1069.48 | -5.45685 | 2 R.SEQQSM Splice@chr   | 4.97E-14 | 0        |
| 11Nov2011 | 8206  | 559.79  | 11.35993 | 2 R.DGWSIGI chr4@4255   | 1.06E-10 | 0.003034 |
| 11Nov2011 | 15621 | 887.93  | 29.43791 | 2 I.DEREESTI Splice@chr | 2.14E-10 | 0.005745 |
| 11Nov2011 | 17066 | 516.31  | 23.5317  | 3 R.NIIFLMVI chrX@1294  | 2.92E-10 | 0.007769 |
| 11Nov2011 | 15281 | 719.38  | 14.92317 | 2 R.FTQAGSE Splice@chr  | 2.70E-13 | 0        |
| 11Nov2011 | 3134  | 412.23  | 25.3069  | 2 R.IASYQGG chrX@1675   | 4.37E-11 | 0.001173 |
| 11Nov2011 | 5386  | 937.48  | 24.27422 | 1 K.LNGGYEC chr2@1191   | 5.66E-11 | 0.001472 |
| 11Nov2011 | 20604 | 1054.07 | 23.45744 | 2 _SVSSK+14 chr4@3345   | 2.01E-10 | 0.005375 |
| 11Nov2011 | 8568  | 559.79  | 11.35993 | 2 R.DGWSIGI chr4@4255   | 1.19E-10 | 0.003325 |

|           |       |         |          |                        |          |          |
|-----------|-------|---------|----------|------------------------|----------|----------|
| 11Nov2011 | 17238 | 1090.53 | -18.1295 | 2 K.INGVTVA chr3@6296  | 2.17E-10 | 0.005745 |
| 11Nov2011 | 1119  | 710.35  | -23.5478 | 2 R.NFFDK+1 chr4@1075  | 2.79E-10 | 0.00759  |
| 11Nov2011 | 2646  | 713.33  | 4.944505 | 3 R.SEQQSM chr3@1195   | 8.62E-14 | 0        |
| 11Nov2011 | 22093 | 1003.52 | 12.6889  | 3 R.CWNRRRA Splice@chr | 5.02E-13 | 0        |
| 11Nov2011 | 2850  | 710.86  | 21.23823 | 2 R.DSTQKW chr3@1337   | 5.28E-11 | 0.001472 |
| 11Nov2011 | 8385  | 739.4   | 18.15789 | 2 K.M+15.99 chr5@5476  | 2.79E-10 | 0.00759  |
| 11Nov2011 | 4003  | 833.46  | -4.25508 | 1 R.DMVQLV chrX@9811   | 3.09E-10 | 0.008308 |
| 11Nov2011 | 5253  | 741.38  | -23.1647 | 2 K.FPENRHL chr2@1477  | 4.70E-11 | 0.001272 |
| 11Nov2011 | 5931  | 1107.56 | -21.6943 | 1 _SSLDKES chr5@1239   | 1.21E-11 | 2.26E-04 |
| 11Nov2011 | 12416 | 1075.05 | -16.1169 | 2 R.TCSK+14. chr2@1255 | 1.57E-10 | 0.004165 |
| 11Nov2011 | 21175 | 1133.59 | -6.23448 | 3 K.HQLVSAF Splice@chr | 1.50E-14 | 0        |
| 11Nov2011 | 9472  | 1086.01 | 9.000639 | 2 V.CLTEEGK Splice@chr | 1.33E-11 | 2.26E-04 |
| 11Nov2011 | 380   | 722.34  | -10.069  | 1 R.FQGGGEI chr1@2595  | 3.38E-10 | 0.008922 |
| 11Nov2011 | 24543 | 1147.24 | 4.705638 | 3 R.FQSAAIG Splice@chr | 3.72E-14 | 0        |
| 11Nov2011 | 2901  | 710.86  | 21.23823 | 2 R.DSTQKW chr3@1337   | 6.31E-11 | 0.001561 |
| 11Nov2011 | 5205  | 741.38  | -23.1647 | 2 K.FPENRHL chr2@1477  | 2.27E-10 | 0.006025 |
| 11Nov2011 | 23657 | 954.46  | 24.98958 | 4 K.FAVADEE Splice@chr | 2.70E-11 | 5.47E-04 |
| 11Nov2011 | 3218  | 851.45  | 27.84704 | 1 R.FAGNSVE chr4@1640  | 1.94E-10 | 0.00519  |
| 11Nov2011 | 21229 | 1133.58 | -15.1469 | 3 K.HQLVSAF Splice@chr | 9.64E-15 | 0        |
| 11Nov2011 | 8777  | 566.31  | 21.45326 | 2 R.EVAQLEC chr5@1706  | 4.12E-11 | 0.001069 |
| 11Nov2011 | 15338 | 719.39  | 28.86707 | 2 R.FTQAGSE Splice@chr | 7.05E-12 | 2.26E-04 |
| 11Nov2011 | 4345  | 479.3   | -0.44486 | 2 K.LKVNGN chrX@8246   | 3.44E-10 | 0.008922 |
| 11Nov2011 | 578   | 703.38  | -2.78167 | 1 _DAAGLAC chr3@2528   | 5.12E-12 | 2.26E-04 |
| 11Nov2011 | 570   | 702.38  | 2.001521 | 1 _DAAGLAC chr3@2528   | 5.12E-12 | 2.26E-04 |
| 11Nov2011 | 20250 | 831.45  | -1.72693 | 2 R.NTRNQLF chrX@7297  | 7.94E-11 | 0.00206  |
| 11Nov2011 | 1152  | 710.35  | -23.5478 | 2 R.NFFDK+1 chr4@1075  | 2.04E-10 | 0.005375 |
| 11Nov2011 | 5696  | 626.8   | -12.4435 | 2 R.LCESGAA Splice@chr | 4.78E-15 | 0        |
| 11Nov2011 | 878   | 446.26  | 15.92188 | 2 R.KGGVSSC chr1@9115  | 6.73E-12 | 2.26E-04 |
| 11Nov2011 | 8721  | 566.31  | 21.45326 | 2 R.EVAQLEC chr5@1706  | 4.81E-11 | 0.001272 |
| 11Nov2011 | 19422 | 843.45  | -16.7082 | 2 K.KMFPEKI chr1@3802  | 2.21E-11 | 5.47E-04 |
| 11Nov2011 | 21943 | 798.39  | -25.1706 | 4 K.SGDAGIV Splice@chr | 2.06E-10 | 0.005471 |
| 11Nov2011 | 5450  | 471.78  | -26.9663 | 2 K.IKVNFPPI chr2@3034 | 2.18E-10 | 0.005745 |
| 11Nov2011 | 1956  | 498.58  | 26.57833 | 3 R.SQYLQM Splice@chr  | 2.88E-10 | 0.007769 |
| 11Nov2011 | 22845 | 1147.25 | 13.44098 | 3 R.FQSAAIG Splice@chr | 1.10E-14 | 0        |
| 11Nov2011 | 11387 | 1345.63 | -24.7692 | 2 _QVREMH Splice@chr   | 1.77E-10 | 0.00465  |
| 11Nov2011 | 330   | 722.35  | 3.723    | 1 R.FQGGGEI chr1@2595  | 3.38E-10 | 0.008255 |
| 11Nov2011 | 22353 | 959.53  | -17.447  | 2 K.KSNFFRFI chr3@1331 | 2.97E-10 | 0.007906 |
| 11Nov2011 | 8111  | 1161.68 | -2.15604 | 1 K.NSKDKLV Splice@chr | 1.67E-10 | 0.004247 |
| 11Nov2011 | 11127 | 467.93  | -25.8815 | 3 R.FLKISLES chr5@3915 | 8.11E-11 | 0.00226  |
| 11Nov2011 | 13559 | 717.89  | 18.98652 | 2 R.LNIAMN Splice@chr  | 2.37E-10 | 0.006299 |
| 11Nov2011 | 22177 | 968.14  | 28.52627 | 3 _GCSIVPIS Splice@chr | 5.12E-11 | 0.001434 |
| 11Nov2011 | 20717 | 1385.75 | 14.42536 | 1 K.FQNFAQI chr2@2226  | 1.99E-10 | 0.005342 |
| 11Nov2011 | 11219 | 491.95  | -21.2173 | 3 K.LGFLVMK chr2@1107  | 2.69E-10 | 0.007249 |
| 11Nov2011 | 9540  | 1000.02 | 11.70688 | 2 R.LVSERYG chr2@8997  | 1.59E-10 | 0.004148 |
| 11Nov2011 | 521   | 703.38  | -2.78167 | 1 _DAAGLAC chr3@2528   | 5.21E-12 | 3.76E-04 |
| 11Nov2011 | 22446 | 1376.99 | 19.51769 | 3 P.PM+15.9 Splice@chr | 7.28E-11 | 0.002061 |
| 11Nov2011 | 12165 | 472.29  | -0.64754 | 2 _SPLFVPKI chrX@4402  | 1.34E-10 | 0.003459 |

|           |       |         |          |                         |          |          |
|-----------|-------|---------|----------|-------------------------|----------|----------|
| 11Nov2011 | 2575  | 710.86  | 21.23823 | 2 R.DSTQKW chr3@1337    | 8.00E-11 | 0.002159 |
| 11Nov2011 | 1157  | 710.36  | -9.42683 | 2 R.NFFDK+1 chr4@1075   | 3.30E-10 | 0.008159 |
| 11Nov2011 | 9388  | 769.42  | -26.3223 | 1 _._NNAKPPk chr3@2451  | 3.59E-10 | 0.008722 |
| 11Nov2011 | 10846 | 781.41  | -6.726   | 2 K.ALEKEDIF chr1@1462  | 7.31E-14 | 0        |
| 11Nov2011 | 16265 | 990.49  | -21.8765 | 2 F.RLSESELE chr4@7519  | 1.37E-10 | 0.003555 |
| 11Nov2011 | 2873  | 710.86  | 21.23823 | 2 R.DSTQKW chr3@1337    | 6.40E-11 | 0.001845 |
| 11Nov2011 | 2616  | 710.86  | 21.23823 | 2 R.DSTQKW chr3@1337    | 2.88E-10 | 0.007725 |
| 11Nov2011 | 16428 | 515.29  | -6.17134 | 3 K.PNFTVILS chr4@1642  | 2.36E-10 | 0.006299 |
| 11Nov2011 | 7422  | 731.4   | -3.00833 | 2 K.KFQFHDF chrX@7811   | 3.30E-10 | 0.008159 |
| 11Nov2011 | 2083  | 498.58  | 26.57833 | 3 R.SQYLQM- Splice@chr  | 3.65E-10 | 0.00931  |
| 11Nov2011 | 12214 | 472.29  | -0.64754 | 2 _._SPLFVPKf chrX@4402 | 2.77E-10 | 0.007442 |
| 11Nov2011 | 19744 | 1044.07 | 4.096092 | 2 R.SQLQTEV Splice@chr  | 3.97E-17 | 0        |
| 11Nov2011 | 4939  | 741.39  | -17.2291 | 2 K.QKSNWH chr5@1229    | 4.34E-11 | 0.001434 |
| 11Nov2011 | 2826  | 710.86  | 21.23823 | 2 R.DSTQKW chr3@1337    | 1.51E-10 | 0.003749 |
| 11Nov2011 | 2647  | 1069.49 | 3.915799 | 2 R.SEQQSM Splice@chr   | 1.14E-14 | 0        |
| 11Nov2011 | 13948 | 1288.7  | -18.58   | 2 K.TKKQKKK chrX@6242   | 1.98E-10 | 0.005342 |
| 11Nov2011 | 20883 | 1003.19 | 17.13413 | 3 R.CWNRRA Splice@chr   | 2.96E-10 | 0.007906 |
| 11Nov2011 | 8764  | 1086.02 | 18.22629 | 2 V.CLTEEGK Splice@chr  | 1.13E-12 | 0        |
| 11Nov2011 | 507   | 702.38  | 2.001521 | 1 _._DAAGLAC chr3@2528  | 5.12E-12 | 3.76E-04 |
| 11Nov2011 | 4991  | 741.38  | -23.1647 | 2 K.FPENRHL chr2@1477   | 1.07E-10 | 0.002653 |
| 11Nov2011 | 8429  | 566.31  | 21.45326 | 2 R.EVAQLEC chr5@1706   | 6.75E-11 | 0.001845 |
| 11Nov2011 | 2135  | 778.38  | -6.0874  | 2 K.IEKEM+1 Splice@chr  | 2.55E-10 | 0.006774 |
| 11Nov2011 | 3013  | 412.23  | 25.3069  | 2 R.IASYQGG chrX@1679   | 3.15E-11 | 0.001245 |
| 11Nov2011 | 5678  | 1107.57 | -12.7508 | 1 _._SSLDKES chr5@1239  | 2.70E-11 | 0.001245 |
| 11Nov2011 | 7185  | 493.78  | -11.3951 | 2 R.KNQENLI Splice@chr  | 2.81E-10 | 0.007535 |
| 11Nov2011 | 3820  | 833.46  | -4.25508 | 1 R.DMVQLV chrX@9811    | 3.05E-10 | 0.008093 |
| 11Nov2011 | 7954  | 559.79  | 11.35993 | 2 R.DGWSIG chr4@4255    | 1.42E-10 | 0.003648 |
| 11Nov2011 | 5732  | 1107.56 | -21.6943 | 1 _._SSLDKES chr5@1239  | 3.62E-10 | 0.008722 |
| 11Nov2011 | 5167  | 936.48  | 27.86052 | 1 K.LNGGYEC chr2@1191   | 4.08E-11 | 0.001434 |
| 11Nov2011 | 8293  | 559.79  | 11.35993 | 2 R.DGWSIG chr4@4255    | 2.17E-10 | 0.00582  |
| 11Nov2011 | 8745  | 724.35  | 19.12636 | 3 V.CLTEEGK Splice@chr  | 1.01E-10 | 0.002653 |
| 11Nov2011 | 21226 | 887.11  | 20.42052 | 3 F.YEEMDYI Splice@chr  | 2.37E-10 | 0.006299 |
| 11Nov2011 | 16413 | 1090.53 | -18.1295 | 2 K.INGVTVA chr3@6296   | 3.00E-10 | 0.007906 |
| 11Nov2011 | 4599  | 876.41  | -8.50606 | 1 K.TEDEARR chrX@1138   | 4.41E-11 | 0.001434 |
| 11Nov2011 | 9019  | 975.56  | -2.75567 | 1 K.LPKLDAYI chr4@1149  | 1.27E-10 | 0.003367 |
| 11Nov2011 | 11865 | 1075.06 | -6.79295 | 2 R.TCSK+14. chr2@1255  | 2.93E-10 | 0.007906 |
| 11Nov2011 | 20893 | 1063.53 | -29.6243 | 2 S.CKCSKNC chr4@7022   | 1.04E-10 | 0.002653 |
| 11Nov2011 | 18757 | 1061.57 | -13.5816 | 2 S.FAK+14.0 chr5@2472  | 3.11E-10 | 0.008093 |
| 11Nov2011 | 3051  | 412.23  | 25.3069  | 2 R.IASYQGG chrX@1679   | 3.37E-11 | 0.001351 |
| 11Nov2011 | 7279  | 579.81  | -21.5115 | 2 _._KIAESGSF chr4@1695 | 1.06E-10 | 0.002653 |
| 11Nov2011 | 7874  | 1025.61 | -11.6755 | 1 K.LGLGSL chr5@4945    | 3.43E-12 | 1.28E-04 |
| 11Nov2011 | 9069  | 975.56  | -2.75567 | 1 K.LPKLDAYI chr4@1149  | 1.83E-10 | 0.004844 |
| 11Nov2011 | 8481  | 566.31  | 21.45326 | 2 R.EVAQLEC chr5@1706   | 1.45E-10 | 0.003648 |
| 11Nov2011 | 22528 | 1377.3  | 1.907931 | 3 P.PM+15.9 Splice@chr  | 5.33E-12 | 4.99E-04 |
| 11Nov2011 | 20097 | 1133.59 | -6.23448 | 3 K.HQLVSAF Splice@chr  | 3.64E-14 | 0        |
| 11Nov2011 | 13613 | 717.89  | 18.98652 | 2 R.LNIAMN\ Splice@chr  | 3.21E-10 | 0.008159 |
| 11Nov2011 | 14546 | 719.39  | 28.86707 | 2 R.FTQAGSE Splice@chr  | 3.76E-13 | 0        |

|           |       |         |          |                          |          |          |
|-----------|-------|---------|----------|--------------------------|----------|----------|
| 11Nov2011 | 20934 | 1003.52 | 12.6889  | 3 R.CWNRRA Splice@chr    | 7.39E-14 | 0        |
| 11Nov2011 | 8232  | 559.79  | 11.35993 | 2 R.DGWSIG( chr4@425     | 1.22E-10 | 0.00327  |
| 11Nov2011 | 9081  | 1086.02 | 18.22629 | 2 V.CLTEEGK Splice@chr   | 2.24E-10 | 0.005909 |
| 11Nov2011 | 25812 | 1216.58 | -19.8654 | 2 L.RNTRNDI chr4@101     | 1.38E-10 | 0.002935 |
| 11Nov2011 | 27591 | 890.43  | 3.605981 | 2 K.GWSVPLI Splice@chr   | 7.90E-11 | 0.001751 |
| 11Nov2011 | 10347 | 1025.61 | -11.6755 | 1 K.LGLGSGL chr5@494     | 8.71E-12 | 1.34E-04 |
| 11Nov2011 | 4173  | 928.48  | 5.067247 | 1 K.FRSHPER chr5@382     | 5.14E-10 | 0.00767  |
| 11Nov2011 | 7659  | 1107.56 | -21.6943 | 1 _..SSLDKES( chr5@123   | 1.69E-10 | 0.003121 |
| 11Nov2011 | 13517 | 565.83  | 14.11658 | 2 R.ISLTNANI chr5@779    | 4.29E-10 | 0.006416 |
| 11Nov2011 | 3959  | 457.25  | 19.59886 | 2 R.QANAVG chr5@174      | 2.12E-10 | 0.003554 |
| 11Nov2011 | 30895 | 761.75  | 21.82333 | 3 K.IFSVEICLF chr2@842   | 4.12E-10 | 0.006263 |
| 11Nov2011 | 2420  | 444.25  | -3.23598 | 2 R.AELSSRPI chr3@810    | 3.53E-10 | 0.005355 |
| 11Nov2011 | 6733  | 741.38  | -23.1647 | 2 K.FPENRHL( chr2@147    | 5.83E-10 | 0.008931 |
| 11Nov2011 | 19125 | 719.38  | 14.92317 | 2 R.FTQAGSE Splice@chr   | 1.42E-13 | 0        |
| 11Nov2011 | 5917  | 433.76  | 2.609238 | 2 _..IVDLPGPI chr3@110   | 1.57E-10 | 0.003028 |
| 11Nov2011 | 31143 | 954.46  | 24.98958 | 4 K.FAVADEE Splice@chr   | 7.53E-12 | 6.82E-05 |
| 11Nov2011 | 9423  | 831.49  | 25.50294 | 1 R.SSINAALF Splice@chr  | 4.97E-10 | 0.007464 |
| 11Nov2011 | 29650 | 634.33  | -6.74606 | 2 R.VDIGDILF Splice@chr  | 6.23E-10 | 0.00966  |
| 11Nov2011 | 21390 | 774.96  | 16.29715 | 2 E.DILFVINK Splice@chr  | 9.80E-12 | 1.34E-04 |
| 11Nov2011 | 24707 | 853.45  | -23.3178 | 2 K.NFKINSK( chr4@581    | 5.42E-10 | 0.00803  |
| 11Nov2011 | 1289  | 632.78  | -25.4076 | 2 _..KM+15.9 Splice@chr  | 2.69E-10 | 0.004015 |
| 11Nov2011 | 6216  | 685.37  | -27.0225 | 2 K.ISTQTHIC chr4@763    | 2.21E-10 | 0.003605 |
| 11Nov2011 | 11265 | 1064.58 | -2.00842 | 1 K.YLINGNEI chr1@868    | 5.94E-11 | 0.001346 |
| 11Nov2011 | 9560  | 494.78  | 1.425137 | 2 R.KNEENLI( chr1@939    | 4.40E-10 | 0.006735 |
| 11Nov2011 | 18310 | 924.4   | -22.6053 | 2 Q.KPDDISN Splice@chr   | 2.79E-10 | 0.00407  |
| 11Nov2011 | 10893 | 559.79  | 11.35993 | 2 R.DGWSIG( chr4@425     | 1.69E-10 | 0.003121 |
| 11Nov2011 | 27731 | 1385.74 | 7.1914   | 1 K.FQNFQAI chr2@222     | 1.52E-10 | 0.003028 |
| 11Nov2011 | 13566 | 565.83  | 14.11658 | 2 R.ISLTNANI chr5@779    | 5.03E-10 | 0.00757  |
| 11Nov2011 | 27122 | 849.91  | -5.21446 | 2 Q.DSSYFVE Splice@chr   | 6.42E-12 | 6.82E-05 |
| 11Nov2011 | 19660 | 622.7   | -11.061  | 3 P.RNWGKG( chrX@144     | 4.42E-10 | 0.006735 |
| 11Nov2011 | 18181 | 894.41  | 13.57006 | 2 _..FDSDDVT Splice@chr  | 2.89E-10 | 0.004231 |
| 11Nov2011 | 31460 | 1027.6  | -14.245  | 2 I.KNELKSKA( chrX@612   | 2.88E-10 | 0.004231 |
| 11Nov2011 | 31463 | 955.86  | 18.18234 | 3 _..FPHTRSSI chr2@124   | 7.32E-11 | 0.001577 |
| 11Nov2011 | 16101 | 472.29  | -0.64754 | 2 _..SPLFVPK( chrX@440   | 2.80E-10 | 0.004121 |
| 11Nov2011 | 636   | 702.38  | 2.001521 | 1 _..DAAGLAC( chr3@252   | 5.12E-12 | 6.82E-05 |
| 11Nov2011 | 19794 | 687.41  | 21.43028 | 2 E.M+15.99( chr2@854    | 1.73E-10 | 0.003121 |
| 11Nov2011 | 10760 | 739.4   | 18.15789 | 2 K.M+15.99( chr5@547    | 4.74E-10 | 0.007205 |
| 11Nov2011 | 10768 | 545.33  | -13.7919 | 2 K.LQVFDKL( chrX@753    | 2.00E-10 | 0.003448 |
| 11Nov2011 | 33391 | 1147.26 | 22.17633 | 3 R.FQSAAIG Splice@chr   | 3.98E-12 | 6.82E-05 |
| 11Nov2011 | 10046 | 868.42  | -0.63154 | 1 K.SSSGSLSS( chr2@113   | 2.37E-10 | 0.003871 |
| 11Nov2011 | 9134  | 434.24  | 13.9946  | 3 _..RSNDQTI( chr5@637   | 6.86E-11 | 0.001518 |
| 11Nov2011 | 6953  | 936.48  | 27.86052 | 1 K.LNGGYEC( chr2@119    | 5.57E-11 | 0.001108 |
| 11Nov2011 | 11298 | 1063.58 | 1.14882  | 1 K.YLINGNEI( chr1@868   | 2.18E-10 | 0.003605 |
| 11Nov2011 | 274   | 848.41  | 2.093776 | 1 R.EEAELEK( chr2@480    | 2.25E-10 | 0.003662 |
| 11Nov2011 | 14324 | 1094.58 | -2.62363 | 1 R.FEWITKN( chr2@613    | 3.00E-10 | 0.004277 |
| 11Nov2011 | 15273 | 430.76  | 3.408589 | 2 R.SILSEIAK( Splice@chr | 4.83E-10 | 0.007306 |
| 11Nov2011 | 19188 | 719.38  | 14.92317 | 2 R.FTQAGSE Splice@chr   | 7.86E-13 | 0        |

|           |       |         |          |                          |          |          |
|-----------|-------|---------|----------|--------------------------|----------|----------|
| 11Nov2011 | 27847 | 855.48  | -6.07153 | 2 K.IFTQTK+1 Splice@chr  | 4.36E-10 | 0.006687 |
| 11Nov2011 | 30584 | 871.93  | 12.93881 | 2 Q.VQMMME Splice@chr    | 2.79E-10 | 0.00407  |
| 11Nov2011 | 30637 | 692.88  | -15.9671 | 2 A.SRLFIFVN Splice@chr  | 3.98E-10 | 0.005995 |
| 11Nov2011 | 364   | 818.41  | -2.53876 | 1 _KNEGASC chr1@1181     | 8.72E-11 | 0.001923 |
| 11Nov2011 | 9988  | 868.42  | -0.63154 | 1 K.SSSGSLSS chr2@1132   | 5.76E-10 | 0.008878 |
| 11Nov2011 | 25474 | 831.95  | -16.4251 | 2 K.PM+15.9 chr3@1124    | 1.02E-10 | 0.002264 |
| 11Nov2011 | 25476 | 831.45  | -1.72693 | 2 R.NTRNQLF chrX@7297    | 4.72E-10 | 0.007205 |
| 11Nov2011 | 21586 | 1090.53 | -18.1295 | 2 K.INGVTVA chr3@6296    | 1.97E-10 | 0.003396 |
| 11Nov2011 | 19891 | 887.96  | -23.1899 | 2 D.FFFLENS chr3@1875    | 4.08E-10 | 0.006263 |
| 11Nov2011 | 26962 | 665.37  | -26.6417 | 2 Q.INNK+14 Splice@chr   | 3.73E-10 | 0.005676 |
| 11Nov2011 | 20935 | 858.47  | -5.67211 | 3 _LETGIIPi Splice@chr   | 3.40E-10 | 0.005143 |
| 11Nov2011 | 31497 | 1027.59 | -24.0001 | 2 I.KNELKSKA chrX@6127   | 2.98E-10 | 0.004277 |
| 11Nov2011 | 17975 | 759.88  | -7.28215 | 2 S.IDQLQLAI chr1@8550   | 6.09E-10 | 0.009512 |
| 11Nov2011 | 13084 | 625.82  | -20.2839 | 2 R.K+14.016 chrX@1356   | 2.46E-10 | 0.003871 |
| 11Nov2011 | 21417 | 833.42  | -19.2103 | 2 _IIEPYVAV Splice@chr   | 3.87E-10 | 0.005783 |
| 11Nov2011 | 21334 | 774.96  | 16.29715 | 2 E.DILFVINK Splice@chr  | 1.86E-11 | 1.95E-04 |
| 11Nov2011 | 7898  | 546.78  | -19.0827 | 2 K.ETETGITC chr4@1221   | 3.83E-10 | 0.005783 |
| 11Nov2011 | 24451 | 1366.17 | -16.3461 | 2 K.TAQTTFTT Splice@chr  | 4.59E-10 | 0.006944 |
| 11Nov2011 | 11381 | 1064.58 | -2.00842 | 1 K.YLINGNEI chr1@8687   | 4.18E-11 | 6.25E-04 |
| 11Nov2011 | 9191  | 434.24  | 13.9946  | 3 _RSNDQTI chr5@6378     | 2.39E-10 | 0.003871 |
| 11Nov2011 | 33987 | 798.4   | 12.60083 | 2 K.VHLVYFN chr5@7770    | 4.95E-10 | 0.007412 |
| 11Nov2011 | 1337  | 503.29  | -1.09364 | 2 K.RSLEYIPK chr1@1227   | 5.79E-10 | 0.008878 |
| 11Nov2011 | 10804 | 507.78  | 21.88395 | 2 Q.DPVEDG Splice@chr    | 2.26E-10 | 0.003714 |
| 11Nov2011 | 27160 | 849.41  | -3.23735 | 2 Q.DSSYFVE Splice@chr   | 2.05E-10 | 0.003502 |
| 11Nov2011 | 31077 | 954.46  | 24.98958 | 4 K.FAVADEE Splice@chr   | 9.54E-11 | 0.002154 |
| 11Nov2011 | 17513 | 599.34  | -5.64446 | 3 _INKFLIFK- chr4@1511   | 3.27E-10 | 0.005037 |
| 11Nov2011 | 21359 | 833.92  | -21.2254 | 2 _IIEPYVAV Splice@chr   | 2.42E-11 | 2.56E-04 |
| 11Nov2011 | 12030 | 724.35  | 19.12636 | 3 V.CLTEEGK Splice@chr   | 7.04E-11 | 0.001518 |
| 11Nov2011 | 30229 | 862.95  | 16.89984 | 2 K.HVLQNDI chr5@1781    | 6.05E-10 | 0.009461 |
| 11Nov2011 | 13553 | 1130.65 | 12.16972 | 1 R.ISLTNANI chr5@7795   | 5.09E-10 | 0.007618 |
| 11Nov2011 | 7713  | 1106.56 | -18.6599 | 1 _SSLDKESC chr5@1239    | 6.39E-10 | 0.009914 |
| 11Nov2011 | 24923 | 969.01  | -11.2595 | 2 Y.QRHVFNI Splice@chr   | 2.54E-10 | 0.003972 |
| 11Nov2011 | 29387 | 957.5   | 1.956888 | 3 R.FIEPIEDIF Splice@chr | 5.87E-10 | 0.00909  |
| 11Nov2011 | 22787 | 849.92  | 6.583873 | 2 Q.DSSYFVE Splice@chr   | 7.31E-12 | 6.82E-05 |
| 11Nov2011 | 17909 | 717.88  | 5.023339 | 2 R.LNIAMN\ chrX@1527    | 2.40E-10 | 0.003871 |
| 11Nov2011 | 11143 | 566.31  | 21.45326 | 2 R.EVAQLEC chr5@1706    | 1.09E-10 | 0.002434 |
| 11Nov2011 | 4814  | 972.55  | -25.2781 | 1 R.QMGKLP chr1@1111     | 5.84E-10 | 0.009039 |
| 11Nov2011 | 7580  | 553.78  | -10.2208 | 2 R.TASQK+1 chrX@5438    | 3.44E-10 | 0.005195 |
| 11Nov2011 | 12048 | 1086.01 | 9.000639 | 2 V.CLTEEGK Splice@chr   | 2.10E-10 | 0.003554 |
| 11Nov2011 | 10372 | 752.88  | -14.2545 | 2 R.GKCNGG chr4@5126     | 3.56E-10 | 0.005355 |
| 11Nov2011 | 726   | 552.8   | 7.143001 | 2 R.TQNATAI Splice@chr   | 4.67E-11 | 9.92E-04 |
| 11Nov2011 | 10457 | 1025.61 | -11.6755 | 1 K.LGLGSGL chr5@4945    | 2.47E-11 | 2.56E-04 |
| 11Nov2011 | 520   | 1000.59 | 27.93569 | 1 R.KNKEQQI Splice@chr   | 4.65E-10 | 0.007104 |
| 11Nov2011 | 29729 | 634.33  | -6.74606 | 2 R.VDIGDILF Splice@chr  | 2.16E-10 | 0.003605 |
| 11Nov2011 | 25538 | 831.45  | -1.72693 | 2 R.NTRNQLF chrX@7297    | 7.74E-11 | 0.001695 |
| 11Nov2011 | 34243 | 1156.09 | 27.7286  | 2 R.AWQALLI chr2@1382    | 3.47E-10 | 0.005195 |
| 11Nov2011 | 6354  | 876.4   | -19.8707 | 1 K.TEDEARR chrX@1138    | 4.26E-11 | 7.48E-04 |

|           |       |         |          |                          |          |          |
|-----------|-------|---------|----------|--------------------------|----------|----------|
| 11Nov2011 | 32915 | 963.13  | 15.42179 | 3 _GCSIVPIS Splice@chr   | 5.95E-12 | 6.82E-05 |
| 11Nov2011 | 11358 | 1063.58 | 1.14882  | 1 K.YLINGNEI chr1@8687   | 5.67E-10 | 0.008724 |
| 11Nov2011 | 32547 | 929.15  | -28.8338 | 3 R.KSTAKLK chr2@8595    | 4.13E-10 | 0.006317 |
| 11Nov2011 | 21486 | 990.49  | -21.8765 | 2 F.RLSESELE chr4@7519   | 1.77E-10 | 0.003121 |
| 11Nov2011 | 19070 | 719.39  | 28.86707 | 2 R.FTQAGSE Splice@chr   | 3.92E-13 | 0        |
| 11Nov2011 | 2063  | 915.47  | 1.201399 | 1 K.FHEIGGQ chrX@4727    | 1.37E-10 | 0.002935 |
| 11Nov2011 | 14769 | 1173.17 | -9.30319 | 3 K.PTMRTCC Splice@chr   | 4.28E-10 | 0.006416 |
| 11Nov2011 | 31053 | 968.13  | 18.26018 | 3 _GCSIVPIS Splice@chr   | 2.30E-10 | 0.003714 |
| 11Nov2011 | 26851 | 890.45  | 26.12723 | 2 K.GWSVPLI Splice@chr   | 4.81E-10 | 0.007258 |
| 11Nov2011 | 27722 | 798.4   | -12.6137 | 4 K.SGDAGIV Splice@chr   | 1.13E-10 | 0.002488 |
| 11Nov2011 | 25766 | 792.47  | 13.77565 | 2 R.SRFAPPSI Splice@chr  | 2.51E-10 | 0.003924 |
| 11Nov2011 | 6897  | 936.48  | 27.86052 | 1 K.LNGGYEC chr2@1191    | 2.66E-11 | 2.56E-04 |
| 11Nov2011 | 17846 | 717.88  | 5.023339 | 2 R.LNIAMN chrX@1527     | 1.25E-10 | 0.002656 |
| 11Nov2011 | 10502 | 677.34  | -8.57314 | 2 K.MQQFST chr5@2080     | 4.61E-10 | 0.006944 |
| 11Nov2011 | 20353 | 685.88  | 4.188613 | 2 K.IVPGGGA chrX@1570    | 5.96E-15 | 0        |
| 11Nov2011 | 22679 | 792.67  | 25.51992 | 4 I.SRVEDDS Splice@chr   | 1.96E-10 | 0.003396 |
| 11Nov2011 | 30291 | 741.88  | -12.6527 | 2 K.KIFLQM+ chr2@1507    | 3.32E-10 | 0.00509  |
| 11Nov2011 | 3164  | 731.41  | 21.89419 | 2 R.EELDSISL chr4@7427   | 2.36E-10 | 0.003871 |
| 11Nov2011 | 11321 | 1064.58 | -2.00842 | 1 K.YLINGNEI chr1@8687   | 8.45E-11 | 0.001868 |
| 11Nov2011 | 17579 | 808.93  | -26.3648 | 2 K.CFRIVEIP chr2@1265   | 3.30E-10 | 0.005037 |
| 11Nov2011 | 21645 | 1090.53 | -18.1295 | 2 K.INGVTVA chr3@6296    | 2.80E-10 | 0.004121 |
| 11Nov2011 | 9502  | 494.78  | 1.425137 | 2 R.KNEENLI chr1@9396    | 4.40E-10 | 0.006735 |
| 11Nov2011 | 33752 | 921.46  | -23.319  | 2 P.SNIPK+14 chr2@1297   | 2.28E-10 | 0.003714 |
| 11Nov2011 | 18121 | 893.91  | 15.44868 | 2 _FSDDDVT Splice@chr    | 4.77E-10 | 0.007205 |
| 11Nov2011 | 7689  | 463.77  | 1.18704  | 2 K.PVNIENLI chrX@1210   | 7.60E-11 | 0.001695 |
| 11Nov2011 | 22731 | 849.93  | 18.38221 | 2 Q.DSSYFVE Splice@chr   | 1.19E-12 | 0        |
| 11Nov2011 | 20836 | 664.7   | 1.197202 | 3 _PTLNK+1 chr1@6526     | 1.21E-10 | 0.002656 |
| 11Nov2011 | 6681  | 741.38  | -23.1647 | 2 K.FPENRHI chr2@1477    | 3.79E-10 | 0.005676 |
| 11Nov2011 | 22201 | 1034.57 | -2.45085 | 2 K.FK+14.01 Splice@chr  | 1.51E-11 | 1.95E-04 |
| 11Nov2011 | 10746 | 507.78  | 21.88395 | 2 Q.DPVEDG Splice@chr    | 1.57E-10 | 0.003028 |
| 11Nov2011 | 13199 | 625.82  | -20.2839 | 2 R.K+14.016 chrX@1356   | 1.92E-10 | 0.003286 |
| 11Nov2011 | 24327 | 853.45  | -23.3178 | 2 K.NFKINSK chr4@5819    | 4.00E-10 | 0.004961 |
| 11Nov2011 | 29894 | 975.81  | -5.15613 | 3 K.SGTIFDNI Splice@chr  | 2.74E-10 | 0.003698 |
| 11Nov2011 | 11930 | 1086.02 | 18.22629 | 2 V.CLTEEGK Splice@chr   | 2.55E-11 | 1.33E-04 |
| 11Nov2011 | 9389  | 832.45  | -26.6763 | 1 R.SSINAALF Splice@chr  | 7.50E-10 | 0.008491 |
| 11Nov2011 | 11276 | 1063.58 | 1.14882  | 1 K.YLINGNEI chr1@8687   | 1.18E-10 | 0.001413 |
| 11Nov2011 | 22821 | 1144.09 | 21.82295 | 2 K.NSRFLSK chr1@8068    | 7.51E-10 | 0.008491 |
| 11Nov2011 | 21146 | 774.96  | 16.29715 | 2 E.DILFVINK Splice@chr  | 1.28E-11 | 6.92E-05 |
| 11Nov2011 | 29099 | 957.5   | 1.956888 | 3 R.FIEPIEDIF Splice@chr | 4.85E-10 | 0.006162 |
| 11Nov2011 | 17738 | 759.88  | -7.28215 | 2 S.IDQLQLAI chr1@8550   | 6.38E-10 | 0.007036 |
| 11Nov2011 | 26671 | 665.37  | -26.6417 | 2 Q.INNK+14 Splice@chr   | 6.81E-10 | 0.007802 |
| 11Nov2011 | 26536 | 889.95  | -19.8868 | 2 K.RSSVHTE Splice@chr   | 5.00E-10 | 0.006162 |
| 11Nov2011 | 18790 | 719.39  | 28.86707 | 2 R.FTQAGSE Splice@chr   | 2.15E-13 | 0        |
| 11Nov2011 | 12926 | 746.36  | -23.1469 | 2 R.SYHYVAF Splice@chr   | 7.35E-10 | 0.008221 |
| 11Nov2011 | 26729 | 665.37  | -26.6417 | 2 Q.INNK+14 Splice@chr   | 4.35E-10 | 0.005455 |
| 11Nov2011 | 31562 | 980.47  | -17.2661 | 3 K.SGTIFDNI Splice@chr  | 6.62E-11 | 6.97E-04 |
| 11Nov2011 | 3525  | 455.9   | -2.50459 | 3 K.NVM+15 chr4@1135     | 8.47E-11 | 9.38E-04 |

|           |       |         |          |                          |          |          |
|-----------|-------|---------|----------|--------------------------|----------|----------|
| 11Nov2011 | 25199 | 521.3   | 24.95499 | 2 R.NLNEVEII chr4@1305   | 5.28E-10 | 0.00637  |
| 11Nov2011 | 7808  | 546.78  | -19.0827 | 2 K.ETETGITC chr4@1221   | 1.99E-10 | 0.002681 |
| 11Nov2011 | 26586 | 889.95  | -19.8868 | 2 K.RSSVHTE Splice@chr   | 3.49E-10 | 0.004287 |
| 11Nov2011 | 11435 | 624.33  | 9.752617 | 2 R.QHAYAVI chrX@1402    | 7.09E-11 | 8.19E-04 |
| 11Nov2011 | 10425 | 752.88  | -14.2545 | 2 R.GKCNGG chr4@5126     | 8.47E-10 | 0.009713 |
| 11Nov2011 | 24449 | 853.45  | -23.3178 | 2 K.NFKINSKI chr4@5815   | 8.32E-10 | 0.009504 |
| 11Nov2011 | 23501 | 1275.6  | -25.4649 | 3 R.YSSECEP( Splice@chr  | 3.36E-12 | 0        |
| 11Nov2011 | 29601 | 1211.58 | -14.5203 | 2 K.IRQWRRR Splice@chr   | 3.35E-10 | 0.004121 |
| 11Nov2011 | 25235 | 831.45  | -1.72693 | 2 R.NTRNQLI chrX@7297    | 5.25E-10 | 0.00637  |
| 11Nov2011 | 18776 | 1043.49 | -4.33253 | 1 R.HRETEPN chr1@3250    | 3.79E-10 | 0.004794 |
| 11Nov2011 | 21092 | 774.96  | 16.29715 | 2 E.DILFVINK Splice@chr  | 4.97E-12 | 6.92E-05 |
| 11Nov2011 | 24694 | 969.01  | -11.2595 | 2 Y.QRHVFNI Splice@chr   | 1.11E-10 | 0.001292 |
| 11Nov2011 | 23571 | 804.91  | 25.79416 | 2 _ .LTMTWN chr1@4513    | 2.99E-10 | 0.003916 |
| 11Nov2011 | 15187 | 430.76  | 3.408589 | 2 R.SILSEIAK Splice@chr  | 6.74E-10 | 0.007696 |
| 11Nov2011 | 31465 | 1000.51 | -15.4866 | 2 E.CLVVNLS Splice@chr   | 3.28E-11 | 2.63E-04 |
| 11Nov2011 | 1525  | 632.78  | -25.4076 | 2 _ .KM+15.9 Splice@chr  | 2.62E-10 | 0.003583 |
| 11Nov2011 | 17559 | 717.88  | 5.023339 | 2 R.LNIAMN\ Splice@chr   | 7.17E-10 | 0.008117 |
| 11Nov2011 | 29144 | 957.5   | 1.956888 | 3 R.FIEPIEDIF Splice@chr | 4.49E-10 | 0.005623 |
| 11Nov2011 | 16681 | 671.37  | -24.0361 | 2 T.FNIVHTQ chr4@1359    | 2.20E-10 | 0.002851 |
| 11Nov2011 | 30928 | 1027.59 | -24.0001 | 2 I.KNELKSKA chrX@6127   | 2.69E-10 | 0.003583 |
| 11Nov2011 | 7827  | 875.49  | 11.27984 | 2 K.KIILM+15 chr4@5840   | 2.05E-10 | 0.002735 |
| 11Nov2011 | 456   | 723.35  | -0.92778 | 1 R.FQGGGEI chr1@2595    | 5.71E-10 | 0.006623 |
| 11Nov2011 | 30793 | 1216.59 | -11.6275 | 2 L.RNTRNDI chr4@1012    | 5.34E-10 | 0.006478 |
| 11Nov2011 | 26836 | 849.41  | -3.23735 | 2 Q.DSSYFVE Splice@chr   | 1.64E-10 | 0.002049 |
| 11Nov2011 | 1396  | 632.78  | -25.4076 | 2 _ .KM+15.9 Splice@chr  | 1.84E-10 | 0.002335 |
| 11Nov2011 | 7498  | 553.78  | -10.2208 | 2 R.TASQK+1 chrX@5438    | 2.15E-10 | 0.002735 |
| 11Nov2011 | 23817 | 1033.54 | 12.33206 | 2 V.VK+14.01 chr4@1676   | 5.90E-10 | 0.00672  |
| 11Nov2011 | 19920 | 599.28  | -28.7398 | 2 K.LCSTADT chrX@1481    | 2.47E-10 | 0.003361 |
| 11Nov2011 | 25296 | 831.45  | -1.72693 | 2 R.NTRNQLI chrX@7297    | 2.41E-10 | 0.003361 |
| 11Nov2011 | 20107 | 685.88  | 4.188613 | 2 K.IVPGGGA chrX@1570    | 4.53E-19 | 0        |
| 11Nov2011 | 30833 | 1026.53 | 10.02262 | 3 R.NFFGYCC chr4@3457    | 7.16E-10 | 0.008117 |
| 11Nov2011 | 28206 | 1024.52 | -27.8903 | 2 F.K+14.016 chr4@8225   | 4.79E-10 | 0.00612  |
| 11Nov2011 | 32524 | 1062.1  | 10.38858 | 2 R.QICPSRLI chr1@1061   | 2.12E-10 | 0.002735 |
| 11Nov2011 | 17630 | 1090.64 | 2.300686 | 1 L.SLIILAM+ Splice@chr  | 7.15E-10 | 0.008117 |
| 11Nov2011 | 21102 | 833.92  | -21.2254 | 2 _ .IIEPYVAV Splice@chr | 4.23E-12 | 0        |
| 11Nov2011 | 13032 | 625.82  | -20.2839 | 2 R.K+14.016 chrX@1356   | 4.88E-10 | 0.006162 |
| 11Nov2011 | 11508 | 724.35  | 19.12636 | 3 V.CLTEEGK Splice@chr   | 6.61E-11 | 6.97E-04 |
| 11Nov2011 | 20570 | 664.7   | 1.197202 | 3 _ .PTLNK+1 chr1@6526   | 8.80E-10 | 0.009977 |
| 11Nov2011 | 32250 | 963.14  | 25.74479 | 3 _ .GCSIVPIS Splice@chr | 6.19E-11 | 6.97E-04 |
| 11Nov2011 | 31443 | 1256.97 | -11.2094 | 3 K.FICETES chr4@3168    | 3.91E-10 | 0.004849 |
| 11Nov2011 | 11215 | 1063.58 | 1.14882  | 1 K.YLINGNEI chr1@8687   | 6.34E-10 | 0.006988 |
| 11Nov2011 | 30215 | 692.88  | -15.9671 | 2 A.SRLFIFVN Splice@chr  | 3.75E-10 | 0.004794 |
| 11Nov2011 | 31012 | 786.92  | 22.65468 | 2 K.ERSNFSKI Splice@chr  | 5.83E-10 | 0.006678 |
| 11Nov2011 | 20608 | 682.88  | -29.0653 | 2 K.RIAQVSK chr4@1486    | 5.64E-10 | 0.006578 |
| 11Nov2011 | 16740 | 671.37  | -24.0361 | 2 T.FNIVHTQ chr4@1359    | 3.10E-10 | 0.003959 |
| 11Nov2011 | 14869 | 1345.63 | -24.7692 | 2 _ .QVREMH Splice@chr   | 3.17E-10 | 0.003959 |
| 11Nov2011 | 11924 | 724.35  | 19.12636 | 3 V.CLTEEGK Splice@chr   | 8.11E-12 | 6.92E-05 |

|           |       |         |          |                        |          |          |
|-----------|-------|---------|----------|------------------------|----------|----------|
| 11Nov2011 | 6276  | 1274.07 | 6.16406  | 2 L.EDESAAV Splice@chr | 1.05E-10 | 0.001112 |
| 11Nov2011 | 31493 | 1000.51 | -15.4866 | 2 E.CLVVNLS Splice@chr | 7.23E-11 | 8.19E-04 |
| 11Nov2011 | 29294 | 876.99  | -11.1881 | 2 V.FPCK+14. chrX@2447 | 5.49E-10 | 0.006531 |
| 11Nov2011 | 18844 | 719.38  | 14.92317 | 2 R.FTQAGSE Splice@chr | 8.94E-14 | 0        |
| 11Nov2011 | 16621 | 671.37  | -24.0361 | 2 T.FNIVHTQ chr4@1359  | 6.77E-10 | 0.007748 |
| 11Nov2011 | 23091 | 1110.04 | -27.8308 | 2 L.LHHHRVL Splice@chr | 1.14E-10 | 0.001292 |
| 11Nov2011 | 7632  | 537.77  | -21.4519 | 2 M.YALTYDL chrX@1428  | 7.60E-10 | 0.00876  |
| 11Nov2011 | 4929  | 496.29  | -16.0958 | 2 _LHLHTLTI Splice@chr | 6.04E-10 | 0.00672  |
| 11Nov2011 | 25561 | 1216.58 | -19.8654 | 2 L.RNTRNDI chr4@1012  | 4.89E-10 | 0.006162 |
| 11Nov2011 | 11225 | 1064.58 | -2.00842 | 1 K.YLINGNEI chr1@8687 | 9.49E-11 | 9.93E-04 |
| 11Nov2011 | 21155 | 833.92  | -21.2254 | 2 _IIEPYVAV Splice@chr | 9.67E-12 | 6.92E-05 |
| 11Nov2011 | 25640 | 1216.58 | -19.8654 | 2 L.RNTRNDI chr4@1012  | 6.42E-10 | 0.007036 |
| 11Nov2011 | 21289 | 990.49  | -21.8765 | 2 F.RLSESELE chr4@7519 | 8.29E-10 | 0.009504 |
| 11Nov2011 | 15833 | 599.34  | -5.64446 | 3 _INKFLIFK chr4@1511  | 5.81E-10 | 0.006623 |
| 11Nov2011 | 10716 | 507.78  | 21.88395 | 2 Q.DPVEDG Splice@chr  | 3.23E-10 | 0.004012 |
| 11Nov2011 | 4052  | 412.23  | 25.3069  | 2 R.IASYQGG chrX@1679  | 2.01E-10 | 0.002681 |
| 11Nov2011 | 3329  | 1065.51 | -21.5582 | 1 K.FNNSEKA Splice@chr | 5.30E-10 | 0.00637  |
| 11Nov2011 | 28946 | 973.46  | 16.48633 | 3 _GCSIVPIS Splice@chr | 1.16E-10 | 0.001353 |
| 11Nov2011 | 30146 | 871.94  | 24.43888 | 2 Q.VQMMEI Splice@chr  | 1.91E-10 | 0.002512 |
| 11Nov2011 | 2885  | 440.26  | -14.0476 | 2 _VSLAHVP chr4@3795   | 3.78E-10 | 0.004794 |
| 11Nov2011 | 1305  | 632.78  | -25.4076 | 2 _KM+15.9 Splice@chr  | 1.46E-10 | 0.001761 |
| 11Nov2011 | 10799 | 1161.66 | -19.4191 | 1 K.NSKDKLV Splice@chr | 1.86E-10 | 0.002335 |
| 11Nov2011 | 3995  | 412.23  | 25.3069  | 2 R.IASYQGG chrX@1679  | 3.11E-11 | 1.99E-04 |
| 11Nov2011 | 21364 | 777.91  | 29.12834 | 2 C.TCLERYLE chrX@1533 | 5.96E-10 | 0.00672  |
| 11Nov2011 | 16799 | 671.37  | -24.0361 | 2 T.FNIVHTQ chr4@1359  | 4.88E-10 | 0.006162 |
| 11Nov2011 | 649   | 552.3   | 10.18569 | 2 R.TQNATAI Splice@chr | 2.43E-10 | 0.003361 |
| 11Nov2011 | 11497 | 1086.02 | 18.22629 | 2 V.CLTEEGK Splice@chr | 5.75E-12 | 6.92E-05 |
| 11Nov2011 | 32615 | 1147.25 | 13.44098 | 3 R.FQSAAIG Splice@chr | 2.21E-14 | 0        |
| 11Nov2011 | 18003 | 1289.2  | -19.8826 | 2 K.TKKQKKK chrX@6244  | 5.69E-10 | 0.006623 |
| 11Nov2011 | 11167 | 1064.59 | 7.411911 | 1 K.YLINGNEI chr1@8687 | 1.30E-10 | 0.001761 |
| 11Nov2011 | 18905 | 719.39  | 28.86707 | 2 R.FTQAGSE Splice@chr | 2.93E-13 | 0        |
| 11Nov2011 | 22496 | 849.93  | 18.38221 | 2 Q.DSSYFVE Splice@chr | 2.37E-10 | 0.003254 |
| 11Nov2011 | 7554  | 553.78  | -10.2208 | 2 R.TASQK+1 chrX@5438  | 5.29E-10 | 0.00637  |
| 11Nov2011 | 7863  | 546.78  | -19.0827 | 2 K.ETETGITC chr4@1221 | 1.74E-10 | 0.002224 |
| 11Nov2011 | 9453  | 493.78  | -11.3951 | 2 R.KNQENLI Splice@chr | 5.09E-10 | 0.00627  |
| 11Nov2011 | 11285 | 1064.58 | -2.00842 | 1 K.YLINGNEI chr1@8687 | 7.18E-11 | 8.19E-04 |
| 11Nov2011 | 2849  | 888.52  | 29.02223 | 1 R.YNLHTLK Splice@chr | 4.76E-10 | 0.006064 |
| 11Nov2011 | 5849  | 831.44  | -0.6597  | 1 K.NEGKTGF chr1@8724  | 6.53E-10 | 0.007255 |
| 11Nov2011 | 23854 | 1356.82 | 14.40578 | 1 W.FLLLRQV Splice@chr | 3.74E-10 | 0.004794 |
| 11Nov2011 | 7613  | 463.77  | 1.18704  | 2 K.PVNIENLI chrX@1210 | 7.60E-11 | 8.76E-04 |
| 11Nov2011 | 31909 | 963.14  | 21.93704 | 3 _CSIRPISG Splice@chr | 8.26E-11 | 8.76E-04 |
| 11Nov2011 | 29229 | 980.05  | -22.3594 | 2 K.K+14.016 chrX@3807 | 6.94E-10 | 0.008017 |
| 11Nov2011 | 7559  | 463.77  | 1.18704  | 2 K.PVNIENLI chrX@1210 | 7.60E-11 | 8.76E-04 |
| 11Nov2011 | 19281 | 894.41  | 13.57006 | 2 _FSDDDVT Splice@chr  | 5.22E-12 | 1.32E-04 |
| 11Nov2011 | 11501 | 1064.58 | -2.00842 | 1 K.YLINGNEI chr1@8687 | 3.13E-11 | 6.71E-04 |
| 11Nov2011 | 27029 | 889.95  | -19.8868 | 2 K.RSSVHTE chr2@8442  | 1.61E-10 | 0.00421  |
| 11Nov2011 | 34194 | 1147.24 | 4.705638 | 3 R.FQSAAIG Splice@chr | 1.34E-11 | 2.56E-04 |

|           |       |         |          |                         |          |          |
|-----------|-------|---------|----------|-------------------------|----------|----------|
| 11Nov2011 | 7111  | 937.48  | 24.27422 | 1 K.LNGGYEC chr2@1191   | 4.43E-11 | 0.001197 |
| 11Nov2011 | 18522 | 1289.2  | -19.8826 | 2 K.TKKQKKK chrX@624    | 3.35E-10 | 0.006667 |
| 11Nov2011 | 25731 | 831.45  | -1.72693 | 2 R.NTRNQLF chrX@729    | 1.42E-10 | 0.003904 |
| 11Nov2011 | 18613 | 1289.2  | -19.8826 | 2 K.TKKQKKK chrX@624    | 2.18E-10 | 0.004704 |
| 11Nov2011 | 1295  | 552.3   | -2.43568 | 2 K.EAEEEEK chrX@558    | 1.89E-10 | 0.004519 |
| 11Nov2011 | 29360 | 1135.56 | 14.02138 | 2 _DMDYAF Splice@chr    | 3.31E-11 | 6.71E-04 |
| 11Nov2011 | 19343 | 893.92  | 26.65922 | 2 _FSDDDVT Splice@chr   | 1.57E-10 | 0.004169 |
| 11Nov2011 | 21566 | 774.96  | 16.29715 | 2 E.DILFVINK Splice@chr | 1.93E-11 | 5.02E-04 |
| 11Nov2011 | 25674 | 831.45  | -1.72693 | 2 R.NTRNQLF chrX@729    | 3.88E-10 | 0.007257 |
| 11Nov2011 | 4873  | 735.86  | -3.36466 | 2 _KNNFNS chr5@161      | 5.72E-10 | 0.009802 |
| 11Nov2011 | 20591 | 685.88  | 4.188613 | 2 K.IVPGGGA chrX@157    | 2.69E-18 | 0        |
| 11Nov2011 | 10891 | 1089.65 | -29.1532 | 1 K.KLKSMKN chr5@370    | 1.22E-10 | 0.003654 |
| 11Nov2011 | 7147  | 936.48  | 27.86052 | 1 K.LNGGYEC chr2@119    | 2.25E-11 | 5.61E-04 |
| 11Nov2011 | 6958  | 741.38  | -23.1647 | 2 K.FPENRHI chr2@147    | 3.20E-10 | 0.006407 |
| 11Nov2011 | 6176  | 831.43  | -12.728  | 1 K.NEGKTGF chr1@872    | 4.34E-11 | 0.001143 |
| 11Nov2011 | 3045  | 888.52  | 29.02223 | 1 R.YNLHTLK Splice@chr  | 5.66E-10 | 0.009703 |
| 11Nov2011 | 12273 | 1086.01 | 9.000639 | 2 V.CLTEEGK Splice@chr  | 1.82E-11 | 4.40E-04 |
| 11Nov2011 | 11560 | 1064.58 | -2.00842 | 1 K.YLINGNEI chr1@868   | 5.11E-11 | 0.001372 |
| 11Nov2011 | 13120 | 1086.51 | 7.454643 | 2 V.CLTEEGK Splice@chr  | 2.17E-10 | 0.004704 |
| 11Nov2011 | 34216 | 962.79  | 9.56147  | 3 _GCSIVPIS Splice@chr  | 4.38E-10 | 0.007541 |
| 11Nov2011 | 12176 | 862.47  | 2.904885 | 1 _PIQDVYK Splice@chr   | 1.80E-10 | 0.004314 |
| 11Nov2011 | 19108 | 894.4   | 2.427875 | 2 _FSDDDVT Splice@chr   | 5.26E-12 | 1.32E-04 |
| 11Nov2011 | 7627  | 626.3   | -9.76097 | 2 R.LCESGAA Splice@chr  | 3.68E-16 | 0        |
| 11Nov2011 | 7620  | 626.8   | -12.4435 | 2 R.LCESGAA Splice@chr  | 9.97E-16 | 0        |
| 11Nov2011 | 15163 | 505.58  | -23.7891 | 3 K.LSSDDFV chr1@318    | 1.12E-10 | 0.003384 |
| 11Nov2011 | 27785 | 890.44  | 14.86661 | 2 K.GWSVPLI Splice@chr  | 6.69E-11 | 0.001944 |
| 11Nov2011 | 8163  | 546.78  | -19.0827 | 2 K.ETETGIT chr4@122    | 1.37E-10 | 0.003904 |
| 11Nov2011 | 10749 | 677.34  | -8.57314 | 2 K.MQQFST chr5@208     | 4.58E-10 | 0.008105 |
| 11Nov2011 | 29965 | 634.34  | 9.059    | 2 R.VDIGDILF Splice@chr | 4.17E-10 | 0.007338 |
| 11Nov2011 | 1004  | 403.23  | 10.8661  | 2 R.AMVASG chr5@172     | 7.18E-12 | 1.94E-04 |
| 11Nov2011 | 7894  | 1107.56 | -21.6943 | 1 _SSLDKESC chr5@123    | 1.51E-11 | 3.80E-04 |
| 11Nov2011 | 31405 | 968.46  | 13.6538  | 3 _GCSIVPIS Splice@chr  | 2.00E-11 | 5.61E-04 |
| 11Nov2011 | 20075 | 687.41  | 21.43028 | 2 E.M+15.99 chr2@854    | 3.80E-10 | 0.007109 |
| 11Nov2011 | 7205  | 936.48  | 27.86052 | 1 K.LNGGYEC chr2@119    | 1.29E-10 | 0.003698 |
| 11Nov2011 | 34955 | 798.4   | 12.60083 | 2 K.VHLVYFN chr5@777    | 4.40E-11 | 0.001197 |
| 11Nov2011 | 5480  | 833.46  | -4.25508 | 1 R.DMVQLV chrX@981     | 3.10E-10 | 0.006203 |
| 11Nov2011 | 33609 | 963.13  | 15.42179 | 3 _GCSIVPIS Splice@chr  | 2.12E-12 | 6.95E-05 |
| 11Nov2011 | 25749 | 521.3   | 24.95499 | 2 R.NLNEVEI chr4@130    | 5.70E-10 | 0.009802 |
| 11Nov2011 | 18672 | 1289.2  | -19.8826 | 2 K.TKKQKKK chrX@624    | 4.52E-10 | 0.008009 |
| 11Nov2011 | 1404  | 632.78  | -25.4076 | 2 _KM+15.9 Splice@chr   | 2.22E-10 | 0.004704 |
| 11Nov2011 | 23008 | 849.92  | 6.583873 | 2 Q.DSSYFVE Splice@chr  | 2.75E-12 | 6.95E-05 |
| 11Nov2011 | 24366 | 784.42  | -26.6807 | 3 _LVK+14.0 Splice@chr  | 3.24E-11 | 6.71E-04 |
| 11Nov2011 | 6068  | 756.43  | -9.04908 | 1 R.PLSAAAA chr5@313    | 4.42E-10 | 0.007644 |
| 11Nov2011 | 7543  | 626.29  | -25.769  | 2 R.LCESGAA Splice@chr  | 4.20E-16 | 0        |
| 11Nov2011 | 24057 | 804.91  | 25.79416 | 2 _LTMTWN chr1@451      | 5.18E-10 | 0.009053 |
| 11Nov2011 | 21624 | 774.96  | 16.29715 | 2 E.DILFVINK Splice@chr | 2.34E-11 | 6.19E-04 |
| 11Nov2011 | 12093 | 700.91  | 19.76809 | 2 K.K+14.016 chr3@107   | 1.01E-10 | 0.003103 |

|           |       |         |          |                          |          |          |
|-----------|-------|---------|----------|--------------------------|----------|----------|
| 11Nov2011 | 29710 | 957.5   | 1.956888 | 3 R.FIEPIEDIF Splice@chr | 5.10E-10 | 0.008956 |
| 11Nov2011 | 27332 | 849.41  | -3.23735 | 2 Q.DSSYFVE Splice@chr   | 5.65E-12 | 1.32E-04 |
| 11Nov2011 | 19049 | 894.41  | 13.57006 | 2 _FDSDDVT Splice@chr    | 1.22E-11 | 2.56E-04 |
| 11Nov2011 | 19872 | 887.93  | 29.43791 | 2 I.DEREESTM Splice@chr  | 1.16E-10 | 0.003492 |
| 11Nov2011 | 31463 | 954.46  | 24.98958 | 4 K.FAVADEE Splice@chr   | 1.28E-10 | 0.003698 |
| 11Nov2011 | 12122 | 862.47  | 2.904885 | 1 _PIQDVYK Splice@chr    | 1.80E-10 | 0.004314 |
| 11Nov2011 | 28103 | 1384.74 | 9.615872 | 1 K.FQNFQAI chr2@2226    | 2.04E-10 | 0.004659 |
| 11Nov2011 | 622   | 702.38  | 2.001521 | 1 _DAAGLAC chr3@2528     | 5.12E-12 | 1.32E-04 |
| 11Nov2011 | 21988 | 1090.53 | -18.1295 | 2 K.INGVTVA chr3@6296    | 3.06E-10 | 0.006157 |
| 11Nov2011 | 34991 | 798.4   | 12.60083 | 2 K.VHLVYFN chr5@7770    | 1.34E-10 | 0.00381  |
| 11Nov2011 | 27788 | 1385.74 | 7.1914   | 1 K.FQNFQAI chr2@2226    | 3.41E-10 | 0.006706 |
| 11Nov2011 | 1558  | 503.28  | -21.0222 | 2 K.RSLEYIPK chr1@1227   | 4.93E-10 | 0.008653 |
| 11Nov2011 | 8222  | 546.78  | -19.0827 | 2 K.ETETGITC chr4@1221   | 8.77E-12 | 1.94E-04 |
| 11Nov2011 | 7091  | 936.48  | 27.86052 | 1 K.LNGGYEC chr2@1191    | 4.00E-11 | 0.001026 |
| 11Nov2011 | 855   | 405.21  | -4.37903 | 2 R.IEHADPK Splice@chr   | 4.26E-10 | 0.007438 |
| 11Nov2011 | 13759 | 1130.64 | 3.300733 | 1 R.ISLTNANI chr5@7793   | 2.84E-10 | 0.005794 |
| 11Nov2011 | 3410  | 801.45  | 3.812604 | 1 R.IEAGGGC chr5@8776    | 3.39E-10 | 0.006706 |
| 11Nov2011 | 14991 | 1173.17 | -9.30319 | 3 K.PTMRTCC Splice@chr   | 1.50E-12 | 6.95E-05 |
| 11Nov2011 | 10317 | 868.42  | -0.63154 | 1 K.SSSGSLSS chr2@1132   | 2.49E-10 | 0.005225 |
| 11Nov2011 | 15961 | 1075.05 | -16.1169 | 2 R.TCSK+14. chr2@1253   | 4.51E-10 | 0.008009 |
| 11Nov2011 | 10920 | 848.47  | -0.50415 | 1 R.VPLFMNI Splice@chr   | 2.66E-10 | 0.005477 |
| 11Nov2011 | 29368 | 1135.06 | 15.50052 | 2 _DMDYAFI Splice@chr    | 1.46E-10 | 0.003956 |
| 11Nov2011 | 29831 | 980.05  | -22.3594 | 2 K.K+14.016 chrX@3807   | 6.15E-11 | 0.001834 |
| 11Nov2011 | 20128 | 687.41  | 21.43028 | 2 E.M+15.99 chr2@8546    | 3.18E-10 | 0.00636  |
| 11Nov2011 | 3368  | 801.45  | 3.812604 | 1 R.IEAGGGC chr5@8776    | 1.89E-12 | 6.95E-05 |
| 11Nov2011 | 29447 | 1135.56 | 14.02138 | 2 _DMDYAFI Splice@chr    | 1.43E-10 | 0.003904 |
| 11Nov2011 | 29448 | 1135.06 | 15.50052 | 2 _DMDYAFI Splice@chr    | 9.40E-11 | 0.002891 |
| 11Nov2011 | 31434 | 726.1   | -25.4204 | 4 _AVPFVPII Splice@chr   | 3.32E-10 | 0.00651  |
| 11Nov2011 | 11490 | 1063.58 | 1.14882  | 1 K.YLINGNEI chr1@8687   | 1.06E-10 | 0.003103 |
| 11Nov2011 | 26884 | 1133.59 | -6.23448 | 3 K.HQLVSAF Splice@chr   | 1.91E-13 | 6.95E-05 |
| 11Nov2011 | 27003 | 1133.59 | -6.23448 | 3 K.HQLVSAF Splice@chr   | 1.22E-12 | 6.95E-05 |
| 11Nov2011 | 29669 | 957.16  | 16.76738 | 3 K.LFQVLQN Splice@chr   | 1.07E-10 | 0.003103 |
| 11Nov2011 | 33897 | 1062.6  | -6.06744 | 2 E.EYFFRNL chrX@1001    | 4.22E-10 | 0.007338 |
| 11Nov2011 | 23062 | 849.92  | 6.583873 | 2 Q.DSSYFVE Splice@chr   | 8.03E-12 | 1.94E-04 |
| 11Nov2011 | 13685 | 565.83  | 14.11658 | 2 R.ISLTNANI chr5@7793   | 4.55E-10 | 0.008105 |
| 11Nov2011 | 32854 | 822.43  | 27.34471 | 2 Q.M+15.99 chrX@5512    | 5.60E-10 | 0.0096   |
| 11Nov2011 | 20653 | 685.88  | 4.188613 | 2 K.IVPGGGA chrX@1570    | 7.18E-15 | 0        |
| 11Nov2011 | 27079 | 1133.59 | -6.23448 | 3 K.HQLVSAF Splice@chr   | 1.22E-13 | 6.95E-05 |
| 11Nov2011 | 27086 | 889.94  | 16.75361 | 2 K.GWSVPLI Splice@chr   | 3.38E-10 | 0.006706 |
| 11Nov2011 | 11817 | 724.34  | 5.400383 | 3 V.CLTEEGK Splice@chr   | 3.97E-11 | 9.68E-04 |
| 11Nov2011 | 19222 | 894.4   | 2.427875 | 2 _FDSDDVT Splice@chr    | 4.45E-12 | 1.32E-04 |
| 11Nov2011 | 26829 | 1133.59 | -6.23448 | 3 K.HQLVSAF Splice@chr   | 1.24E-13 | 6.95E-05 |
| 11Nov2011 | 19535 | 719.39  | 28.86707 | 2 R.FTQAGSE Splice@chr   | 1.65E-13 | 6.95E-05 |
| 11Nov2011 | 11610 | 1063.58 | 1.14882  | 1 K.YLINGNEI chr1@8687   | 5.40E-10 | 0.0094   |
| 11Nov2011 | 7961  | 463.77  | 1.18704  | 2 K.PVNIENLI chrX@1210   | 3.58E-10 | 0.006744 |
| 11Nov2011 | 31473 | 1272.28 | 27.03865 | 3 K.FAVADEE Splice@chr   | 5.32E-11 | 0.001488 |
| 11Nov2011 | 6911  | 741.38  | -23.1647 | 2 K.FPENRHI chr2@1477    | 1.36E-10 | 0.003904 |

|           |       |         |          |                           |          |          |
|-----------|-------|---------|----------|---------------------------|----------|----------|
| 11Nov2011 | 16496 | 662.86  | 7.984656 | 2 S.INM+15.5 chr4@2551    | 5.09E-10 | 0.008956 |
| 11Nov2011 | 30574 | 741.87  | -26.1725 | 2 K.KIFLQM+ chr2@1507     | 1.99E-10 | 0.004659 |
| 11Nov2011 | 31480 | 726.35  | -26.5771 | 4 _._AVPFVPI\$ Splice@chr | 6.03E-11 | 0.001599 |
| 11Nov2011 | 18992 | 894.41  | 13.57006 | 2 _._FDSDDVT Splice@chr   | 2.25E-11 | 5.61E-04 |
| 11Nov2011 | 1470  | 632.78  | -25.4076 | 2 _._KM+15.9 Splice@chr   | 1.94E-10 | 0.004572 |
| 11Nov2011 | 19476 | 719.38  | 14.92317 | 2 R.FTQAGSE Splice@chr    | 4.05E-14 | 0        |
| 11Nov2011 | 29410 | 1135.06 | 15.50052 | 2 _._DMDYAFI Splice@chr   | 4.91E-11 | 0.001256 |
| 11Nov2011 | 29409 | 1135.56 | 14.02138 | 2 _._DMDYAFI Splice@chr   | 3.51E-13 | 6.95E-05 |
| 11Nov2011 | 26941 | 1133.59 | -6.23448 | 3 K.HQLVSAF Splice@chr    | 4.58E-14 | 0        |
| 11Nov2011 | 11448 | 1064.58 | -2.00842 | 1 K.YLINGNEI chr1@8687    | 8.79E-11 | 0.002669 |
| 11Nov2011 | 31564 | 968.13  | 14.47345 | 3 _._CSIRPISG Splice@chr  | 2.18E-10 | 0.004704 |
| 11Nov2011 | 31568 | 954.46  | 24.98958 | 4 K.FAVADEE Splice@chr    | 1.55E-12 | 6.95E-05 |
| 11Nov2011 | 14216 | 1173.5  | -13.1731 | 3 K.PTMRTCC Splice@chr    | 2.08E-13 | 6.95E-05 |
| 11Nov2011 | 15042 | 1173.5  | -13.1731 | 3 K.PTMRTCC Splice@chr    | 3.03E-12 | 1.32E-04 |
| 11Nov2011 | 27878 | 1064.2  | -10.2401 | 3 K.SGDAGIV Splice@chr    | 5.25E-12 | 1.32E-04 |
| 11Nov2011 | 704   | 549.78  | -29.1391 | 2 R.RKDAGHI chrX@3850     | 2.16E-10 | 0.004704 |
| 11Nov2011 | 13741 | 565.83  | 14.11658 | 2 R.ISLTNANI chr5@7795    | 2.73E-10 | 0.005582 |
| 11Nov2011 | 769   | 549.78  | -29.1391 | 2 R.RKDAGHI chrX@3850     | 3.07E-10 | 0.006203 |
| 11Nov2011 | 14156 | 1173.16 | -17.9121 | 3 K.PTMRTCC Splice@chr    | 1.26E-13 | 6.95E-05 |
| 11Nov2011 | 27731 | 890.44  | 14.86661 | 2 K.GWSVPLI Splice@chr    | 5.35E-12 | 1.32E-04 |
| 11Nov2011 | 31350 | 968.13  | 18.26018 | 3 _._GCSIVPIS Splice@chr  | 1.79E-10 | 0.004314 |
| 11Nov2011 | 7860  | 553.78  | -10.2208 | 2 R.TASQK+1 chrX@5438     | 5.27E-10 | 0.009205 |
| 11Nov2011 | 34743 | 1114.08 | -27.2909 | 2 _._TVLQTAC chr5@1395    | 5.59E-10 | 0.0096   |
| 11Nov2011 | 31514 | 968.13  | 18.26018 | 3 _._GCSIVPIS Splice@chr  | 1.52E-11 | 3.80E-04 |
| 11Nov2011 | 19421 | 719.39  | 28.86707 | 2 R.FTQAGSE Splice@chr    | 3.17E-13 | 6.95E-05 |
| 11Nov2011 | 35055 | 798.4   | 12.60083 | 2 K.VHLVYFN chr5@7770     | 1.27E-10 | 0.003698 |
| 11Nov2011 | 29753 | 957.5   | 1.956888 | 3 R.FIEPIEDIF Splice@chr  | 1.40E-10 | 0.003904 |
| 11Nov2011 | 23552 | 1110.04 | -27.8308 | 2 L.LHHHRVL Splice@chr    | 1.53E-10 | 0.004169 |
| 11Nov2011 | 12267 | 975.55  | -13.0268 | 1 K.LPKLDAYI chr4@1149    | 2.35E-10 | 0.005077 |
| 11Nov2011 | 12263 | 724.34  | 5.400383 | 3 V.CLTEEGK Splice@chr    | 7.22E-12 | 1.94E-04 |
| 11Nov2011 | 31913 | 1000.51 | -15.4866 | 2 E.CLVVNLS Splice@chr    | 2.31E-10 | 0.004976 |
| 11Nov2011 | 11435 | 1064.58 | -2.00842 | 1 K.YLINGNEI chr1@8687    | 1.13E-10 | 0.002705 |
| 11Nov2011 | 20801 | 664.7   | 1.197202 | 3 _._PTLNK+1 chr1@6526    | 2.35E-11 | 5.19E-04 |
| 11Nov2011 | 19748 | 687.41  | 21.43028 | 2 E.M+15.99 chr2@8546     | 5.22E-10 | 0.00987  |
| 11Nov2011 | 21282 | 774.96  | 16.29715 | 2 E.DILFVINK Splice@chr   | 1.16E-11 | 3.32E-04 |
| 11Nov2011 | 19041 | 719.39  | 28.86707 | 2 R.FTQAGSE Splice@chr    | 1.87E-13 | 0        |
| 11Nov2011 | 20317 | 685.88  | 4.188613 | 2 K.IVPGGGA chrX@1570     | 1.38E-18 | 0        |
| 11Nov2011 | 11320 | 1064.59 | 7.411911 | 1 K.YLINGNEI chr1@8687    | 7.81E-11 | 0.001902 |
| 11Nov2011 | 12918 | 1086.51 | 7.454643 | 2 V.CLTEEGK Splice@chr    | 7.19E-11 | 0.001782 |
| 11Nov2011 | 27423 | 890.44  | 14.86661 | 2 K.GWSVPLI Splice@chr    | 1.25E-11 | 3.32E-04 |
| 11Nov2011 | 19162 | 719.39  | 28.86707 | 2 R.FTQAGSE Splice@chr    | 1.06E-13 | 0        |
| 11Nov2011 | 17242 | 1106.51 | -25.9146 | 1 R.M+15.99 chr5@9235     | 5.33E-10 | 0.009972 |
| 11Nov2011 | 32395 | 929.15  | -28.8338 | 3 R.KSTAKLK\$ chr2@8595   | 2.30E-10 | 0.004976 |
| 11Nov2011 | 6972  | 936.48  | 27.86052 | 1 K.LNGGYEC chr2@1191     | 4.70E-11 | 0.001258 |
| 11Nov2011 | 3228  | 802.45  | -0.37858 | 1 R.IEAGGGC chr5@8776     | 3.42E-10 | 0.006576 |
| 11Nov2011 | 7784  | 1107.57 | -12.7508 | 1 _._SSLDKESC chr5@1239   | 5.14E-11 | 0.00138  |
| 11Nov2011 | 31942 | 1000.51 | -15.4866 | 2 E.CLVVNLS Splice@chr    | 9.13E-11 | 0.002249 |

|           |       |         |          |                          |          |          |
|-----------|-------|---------|----------|--------------------------|----------|----------|
| 11Nov2011 | 7087  | 936.48  | 27.86052 | 1 K.LNGGYEC chr2@1191    | 4.29E-11 | 0.001199 |
| 11Nov2011 | 29403 | 957.5   | 1.956888 | 3 R.FIEPIEDIF Splice@chr | 2.92E-10 | 0.005657 |
| 11Nov2011 | 8006  | 546.78  | -19.0827 | 2 K.ETETGITC chr4@1221   | 3.63E-10 | 0.006952 |
| 11Nov2011 | 18698 | 894.41  | 13.57006 | 2 _FSDDDVT Splice@chr    | 1.53E-11 | 3.32E-04 |
| 11Nov2011 | 25637 | 732.07  | 19.51873 | 3 R.ATDDWII Splice@chr   | 1.33E-10 | 0.003398 |
| 11Nov2011 | 19800 | 687.41  | 21.43028 | 2 E.M+15.99 chr2@8546    | 4.79E-10 | 0.009248 |
| 11Nov2011 | 18761 | 894.4   | 2.427875 | 2 _FSDDDVT Splice@chr    | 9.99E-12 | 1.37E-04 |
| 11Nov2011 | 25443 | 831.45  | -1.72693 | 2 R.NTRNQLF chrX@7297    | 4.28E-10 | 0.008238 |
| 11Nov2011 | 32105 | 1376.97 | 5.086429 | 3 P.PM+15.9 Splice@chr   | 4.41E-13 | 7.08E-05 |
| 11Nov2011 | 15527 | 1173.16 | -17.9121 | 3 K.PTMRTCC Splice@chr   | 3.18E-14 | 0        |
| 11Nov2011 | 27570 | 1385.75 | 14.42536 | 1 K.FQNFAQI chr2@2226    | 1.55E-10 | 0.003651 |
| 11Nov2011 | 9308  | 434.24  | 13.9946  | 3 _RSNDQTI chr5@6378     | 8.40E-11 | 0.002195 |
| 11Nov2011 | 30946 | 968.13  | 18.26018 | 3 _GCSIVPIS Splice@chr   | 1.19E-10 | 0.002997 |
| 11Nov2011 | 30360 | 1213.63 | 2.946605 | 2 K.VQHHLFE Splice@chr   | 2.12E-16 | 0        |
| 11Nov2011 | 4420  | 531.29  | -9.73299 | 2 R.DLWETLF chr5@1874    | 3.30E-10 | 0.006474 |
| 11Nov2011 | 7383  | 432.75  | 10.60282 | 2 R.VYQVLDK chr1@9136    | 4.65E-10 | 0.008817 |
| 11Nov2011 | 21342 | 774.96  | 16.29715 | 2 E.DILFVINK Splice@chr  | 1.63E-11 | 3.32E-04 |
| 11Nov2011 | 31122 | 1272.26 | 11.28644 | 3 K.FAVADEE Splice@chr   | 7.25E-13 | 7.08E-05 |
| 11Nov2011 | 15640 | 1075.05 | -16.1169 | 2 R.TCSK+14. chr2@1255   | 2.17E-10 | 0.004697 |
| 11Nov2011 | 26711 | 889.95  | -19.8868 | 2 K.RSSVHTE chr2@8442    | 4.82E-10 | 0.009358 |
| 11Nov2011 | 27995 | 1384.74 | 9.615872 | 1 K.FQNFAQI chr2@2226    | 2.90E-10 | 0.005657 |
| 11Nov2011 | 7474  | 626.3   | -9.76097 | 2 R.LCESGAA Splice@chr   | 1.11E-15 | 0        |
| 11Nov2011 | 18896 | 894.41  | 13.57006 | 2 _FSDDDVT Splice@chr    | 2.64E-12 | 7.08E-05 |
| 11Nov2011 | 27546 | 798.15  | -11.5616 | 4 K.SGDAGIV Splice@chr   | 1.36E-10 | 0.003446 |
| 11Nov2011 | 3427  | 452.27  | 20.92287 | 2 K.KTPNFAP chr2@1125    | 4.91E-10 | 0.009517 |
| 11Nov2011 | 26961 | 849.41  | -3.23735 | 2 Q.DSSYFVE Splice@chr   | 1.03E-10 | 0.002472 |
| 11Nov2011 | 5383  | 833.46  | -4.25508 | 1 R.DMVQLV chrX@9811     | 3.09E-10 | 0.005987 |
| 11Nov2011 | 10770 | 1089.65 | -29.1532 | 1 K.KLKSMKN chr5@3701    | 2.33E-10 | 0.00503  |
| 11Nov2011 | 18380 | 1289.2  | -19.8826 | 2 K.TKKQKKK chrX@6244    | 3.75E-10 | 0.007221 |
| 11Nov2011 | 7027  | 936.48  | 27.86052 | 1 K.LNGGYEC chr2@1191    | 2.24E-11 | 5.19E-04 |
| 11Nov2011 | 17449 | 914     | 0.03462  | 2 K.VGINYQP chr1@8356    | 1.59E-10 | 0.003651 |
| 11Nov2011 | 29113 | 1135.06 | 15.50052 | 2 _DMDYAFI Splice@chr    | 8.83E-11 | 0.002249 |
| 11Nov2011 | 20742 | 664.7   | 1.197202 | 3 _PTLNK+1. chr1@6526    | 5.69E-11 | 0.00143  |
| 11Nov2011 | 15875 | 943.57  | -3.04345 | 1 K.GSK+14.C chrX@1205   | 2.33E-10 | 0.00503  |
| 11Nov2011 | 7417  | 626.3   | -9.76097 | 2 R.LCESGAA Splice@chr   | 1.57E-16 | 0        |
| 11Nov2011 | 11425 | 1063.58 | 1.14882  | 1 K.YLINGNEI chr1@8687   | 4.97E-10 | 0.009619 |
| 11Nov2011 | 5977  | 831.44  | -19.0561 | 1 K.WGGGGC chr3@1095     | 5.18E-10 | 0.009824 |
| 11Nov2011 | 31022 | 726.35  | -26.5771 | 4 _AVPFVPII Splice@chr   | 3.16E-10 | 0.006375 |
| 11Nov2011 | 10635 | 677.34  | -8.57314 | 2 K.MQQFSTI chr5@2080    | 4.19E-10 | 0.008137 |
| 11Nov2011 | 28052 | 1384.75 | 16.84983 | 1 K.FQNFAQI chr2@2226    | 5.25E-10 | 0.009972 |
| 11Nov2011 | 11488 | 1063.58 | 1.14882  | 1 K.YLINGNEI chr1@8687   | 3.98E-10 | 0.007537 |
| 11Nov2011 | 4153  | 418.89  | -10.5715 | 3 R.ENFATKC chr5@5231    | 3.47E-10 | 0.006624 |
| 11Nov2011 | 27604 | 798.4   | -12.6137 | 4 K.SGDAGIV Splice@chr   | 1.42E-10 | 0.0035   |
| 11Nov2011 | 13906 | 1173.17 | -9.30319 | 3 K.PTMRTCC Splice@chr   | 5.83E-12 | 1.37E-04 |
| 11Nov2011 | 25346 | 809.11  | 19.47063 | 3 _AKNATKY chr1@3095     | 1.22E-13 | 0        |
| 11Nov2011 | 18843 | 894.4   | 2.427875 | 2 _FSDDDVT Splice@chr    | 3.63E-12 | 7.08E-05 |
| 11Nov2011 | 33020 | 963.13  | 15.42179 | 3 _GCSIVPIS Splice@chr   | 2.31E-10 | 0.00503  |

|           |       |         |          |                          |          |          |
|-----------|-------|---------|----------|--------------------------|----------|----------|
| 11Nov2011 | 21361 | 833.92  | -21.2254 | 2 _..IIEPYVAV Splice@chr | 4.43E-11 | 0.001199 |
| 11Nov2011 | 6984  | 937.48  | 24.27422 | 1 K.LNGGYEC chr2@1191    | 2.65E-11 | 5.19E-04 |
| 11Nov2011 | 535   | 702.38  | 2.001521 | 1 _..DAAGLAC chr3@2528   | 1.29E-11 | 3.32E-04 |
| 11Nov2011 | 22225 | 1034.57 | -2.45085 | 2 K.FK+14.01 Splice@chr  | 1.24E-12 | 7.08E-05 |
| 11Nov2011 | 27017 | 849.91  | -5.21446 | 2 Q.DSSYFVE Splice@chr   | 1.22E-12 | 7.08E-05 |
| 11Nov2011 | 27018 | 849.41  | -3.23735 | 2 Q.DSSYFVE Splice@chr   | 2.72E-12 | 7.08E-05 |
| 11Nov2011 | 26767 | 890.45  | 26.12723 | 2 K.GWSVPLI Splice@chr   | 3.96E-10 | 0.007486 |
| 11Nov2011 | 27516 | 890.44  | 14.86661 | 2 K.GWSVPLI Splice@chr   | 6.51E-12 | 1.37E-04 |
| 11Nov2011 | 18254 | 894.41  | 13.57006 | 2 _..FDSDDTV Splice@chr  | 4.14E-10 | 0.007921 |
| 11Nov2011 | 15107 | 1345.63 | -24.7692 | 2 _..QVREMH Splice@chr   | 3.64E-10 | 0.006952 |
| 11Nov2011 | 6619  | 1274.07 | 6.16406  | 2 L.EDESAAV Splice@chr   | 5.19E-10 | 0.009824 |
| 11Nov2011 | 11366 | 1063.58 | 1.14882  | 1 K.YLINGNEI chr1@8687   | 5.14E-10 | 0.009824 |
| 11Nov2011 | 15476 | 1173.16 | -17.9121 | 3 K.PTMRTCC Splice@chr   | 2.43E-14 | 0        |
| 11Nov2011 | 33220 | 1147.25 | 13.44098 | 3 R.FQSAAIG Splice@chr   | 1.85E-16 | 0        |
| 11Nov2011 | 14661 | 1173.17 | -9.30319 | 3 K.PTMRTCC Splice@chr   | 2.17E-10 | 0.004697 |
| 11Nov2011 | 24516 | 853.45  | -23.3178 | 2 K.NFKINSKI chr4@5819   | 5.24E-10 | 0.00987  |
| 11Nov2011 | 22606 | 849.93  | 18.38221 | 2 Q.DSSYFVE Splice@chr   | 8.49E-11 | 0.002195 |
| 11Nov2011 | 27681 | 1385.75 | 14.42536 | 1 K.FQNFAQI chr2@2226    | 2.81E-11 | 5.80E-04 |
| 11Nov2011 | 23234 | 1110.04 | -27.8308 | 2 L.LHHHRVL Splice@chr   | 4.91E-11 | 0.001318 |
| 11Nov2011 | 20258 | 685.88  | 4.188613 | 2 K.IVPGGGA chrX@1570    | 3.19E-17 | 0        |
| 11Nov2011 | 31907 | 1256.96 | -19.1791 | 3 K.FICETES chr4@3168    | 4.17E-10 | 0.00803  |
| 11Nov2011 | 18321 | 1289.2  | -19.8826 | 2 K.TKKQKKK chrX@6244    | 9.21E-11 | 0.002249 |
| 11Nov2011 | 33336 | 962.8   | 16.16136 | 3 _..CSIRPISG Splice@chr | 1.67E-11 | 3.32E-04 |
| 11Nov2011 | 5895  | 486.28  | -5.97825 | 2 R.NGQLNRI Splice@chr   | 3.81E-10 | 0.007326 |
| 11Nov2011 | 22894 | 656.36  | -18.1296 | 3 R.PEKLIEM chr3@1258    | 2.36E-10 | 0.005081 |
| 11Nov2011 | 14713 | 1173.5  | -13.1731 | 3 K.PTMRTCC Splice@chr   | 5.30E-15 | 0        |
| 11Nov2011 | 32188 | 822.43  | 27.34471 | 2 Q.M+15.99 chrX@5512    | 3.79E-10 | 0.007275 |
| 11Nov2011 | 30986 | 968.47  | 20.13314 | 3 _..CSIRPISG Splice@chr | 9.21E-11 | 0.002249 |
| 11Nov2011 | 26696 | 837.96  | -10.9805 | 2 R.NLRVK+1 chr1@2688    | 7.49E-11 | 0.001782 |
| 11Nov2011 | 11975 | 862.47  | 2.904885 | 1 _..PIQDVYK Splice@chr  | 1.80E-10 | 0.003928 |
| 11Nov2011 | 7037  | 937.48  | 24.27422 | 1 K.LNGGYEC chr2@1191    | 4.39E-11 | 0.001199 |
| 11Nov2011 | 14802 | 1173.17 | -9.30319 | 3 K.PTMRTCC Splice@chr   | 2.94E-11 | 5.80E-04 |
| 11Nov2011 | 7793  | 463.77  | 1.18704  | 2 K.PVNIENLI chrX@1210   | 7.78E-11 | 0.001841 |
| 11Nov2011 | 5330  | 832.46  | -0.22022 | 1 R.DMVQLV chrX@9811     | 3.05E-10 | 0.005987 |
| 11Nov2011 | 12031 | 862.47  | 2.904885 | 1 _..PIQDVYK Splice@chr  | 1.80E-10 | 0.003928 |
| 11Nov2011 | 20752 | 682.88  | -29.0653 | 2 K.RIAQVSK chr4@1486    | 5.16E-10 | 0.009824 |
| 11Nov2011 | 26665 | 889.95  | -19.8868 | 2 K.RSSVHTE chr2@8442    | 1.27E-10 | 0.003228 |
| 11Nov2011 | 28048 | 1003.19 | 17.13413 | 3 R.CWNRRA Splice@chr    | 1.05E-12 | 7.08E-05 |
| 11Nov2011 | 18953 | 894.41  | 13.57006 | 2 _..FDSDDTV Splice@chr  | 7.23E-12 | 1.37E-04 |
| 11Nov2011 | 27735 | 1385.74 | 7.1914   | 1 K.FQNFAQI chr2@2226    | 1.92E-10 | 0.004143 |
| 11Nov2011 | 6565  | 1274.07 | 6.16406  | 2 L.EDESAAV Splice@chr   | 5.51E-11 | 0.00143  |
| 11Nov2011 | 11308 | 1063.58 | 1.14882  | 1 K.YLINGNEI chr1@8687   | 6.68E-11 | 0.001545 |
| 11Nov2011 | 13811 | 1173.17 | -9.30319 | 3 K.PTMRTCC Splice@chr   | 1.15E-10 | 0.002881 |
| 11Nov2011 | 25788 | 1216.58 | -19.8654 | 2 L.RNTRNDI chr4@1012    | 2.44E-10 | 0.005133 |
| 11Nov2011 | 29062 | 1135.56 | 14.02138 | 2 _..DMDYAFI Splice@chr  | 2.09E-11 | 4.60E-04 |
| 11Nov2011 | 16771 | 671.37  | -24.0361 | 2 T.FNIVHTQ Splice@chr   | 3.47E-10 | 0.006624 |
| 11Nov2011 | 6812  | 741.39  | -17.2291 | 2 K.QKSNWH chr5@1229     | 2.71E-11 | 5.19E-04 |

|           |       |         |          |                          |          |          |
|-----------|-------|---------|----------|--------------------------|----------|----------|
| 11Nov2011 | 19100 | 719.39  | 28.86707 | 2 R.FTQAGSE Splice@chr   | 5.24E-14 | 0        |
| 11Nov2011 | 30240 | 741.88  | -12.6527 | 2 K.KIFLQM+ chr2@1507    | 3.32E-10 | 0.006474 |
| 11Nov2011 | 32362 | 929.16  | -18.1332 | 3 R.KSTAKLK+ chr2@8595   | 1.31E-10 | 0.003398 |
| 11Nov2011 | 18638 | 894.41  | 13.57006 | 2 _FSDDDVT Splice@chr    | 4.67E-12 | 7.08E-05 |
| 11Nov2011 | 12063 | 975.55  | -13.0268 | 1 K.LPKLDAYI chr4@1149   | 7.68E-11 | 0.001841 |
| 11Nov2011 | 22701 | 849.93  | 18.38221 | 2 Q.DSSYFVE Splice@chr   | 5.39E-12 | 1.37E-04 |
| 11Nov2011 | 6860  | 741.39  | -17.2291 | 2 K.QKSNWH chr5@1229     | 3.68E-11 | 9.56E-04 |
| 11Nov2011 | 18263 | 1289.2  | -19.8826 | 2 K.TKKQKKK chrX@6244    | 4.21E-10 | 0.008238 |
| 11Nov2011 | 11376 | 1064.58 | -2.00842 | 1 K.YLINGNEI chr1@8687   | 1.00E-10 | 0.002472 |
| 11Nov2011 | 25387 | 831.45  | -1.72693 | 2 R.NTRNQLF chrX@7297    | 2.83E-10 | 0.00555  |
| 11Nov2011 | 5725  | 741.38  | -23.1647 | 2 K.FPENRHI+ chr2@1477   | 7.66E-11 | 0.002355 |
| 11Nov2011 | 22832 | 1385.75 | 14.42536 | 1 K.FQNFQAI chr2@2226    | 2.41E-10 | 0.006454 |
| 11Nov2011 | 657   | 703.38  | -2.78167 | 1 _DAAGLAC chr3@2528     | 5.12E-12 | 1.18E-04 |
| 11Nov2011 | 13353 | 559.32  | 28.75221 | 2 R.IGMDLM Splice@chr    | 3.43E-11 | 9.64E-04 |
| 11Nov2011 | 3023  | 713.33  | 4.944505 | 3 R.SEQQSM Splice@chr    | 7.25E-12 | 2.32E-04 |
| 11Nov2011 | 3021  | 1069.49 | 3.915799 | 2 R.SEQQSM chr3@1199     | 1.58E-15 | 0        |
| 11Nov2011 | 646   | 702.38  | 2.001521 | 1 _DAAGLAC chr3@2528     | 5.12E-12 | 1.18E-04 |
| 11Nov2011 | 21573 | 1216.58 | -19.8654 | 2 L.RNTRNDI+ chr4@1012   | 1.91E-10 | 0.005269 |
| 11Nov2011 | 11573 | 565.82  | -3.62141 | 2 R.ISLTNANI chr5@7795   | 2.48E-10 | 0.007107 |
| 11Nov2011 | 5925  | 471.79  | -5.7044  | 2 K.IKVNFPPI chr2@3034   | 3.67E-10 | 0.009641 |
| 11Nov2011 | 2855  | 439.74  | 18.7116  | 2 R.SIAMFGP chr2@4157    | 2.33E-10 | 0.006366 |
| 11Nov2011 | 12054 | 781.41  | -6.726   | 2 K.ALEKEDIF chr1@1462   | 7.31E-16 | 0        |
| 11Nov2011 | 3079  | 615.8   | -16.0827 | 2 _QLEISFD+ Splice@chr   | 2.81E-10 | 0.007635 |
| 11Nov2011 | 5853  | 937.48  | 24.27422 | 1 K.LNGGYEC chr2@1191    | 2.16E-10 | 0.006105 |
| 11Nov2011 | 9455  | 566.31  | 21.45326 | 2 R.EVAQLEC chr5@1706    | 2.93E-11 | 7.55E-04 |
| 11Nov2011 | 23814 | 957.5   | 1.956888 | 3 R.FIEPIEDIF Splice@chr | 3.19E-10 | 0.008578 |
| 11Nov2011 | 21522 | 1216.58 | -19.8654 | 2 L.RNTRNDI+ chr4@1012   | 3.66E-10 | 0.009641 |
| 11Nov2011 | 3230  | 710.86  | 21.23823 | 2 R.DSTQKW chr3@1337     | 7.06E-11 | 0.00176  |
| 11Nov2011 | 9162  | 1161.66 | -19.4191 | 1 K.NSKDKLV Splice@chr   | 3.20E-10 | 0.008578 |
| 11Nov2011 | 22966 | 1188.08 | 2.495668 | 2 R.TWGYPN Splice@chr    | 9.15E-11 | 0.002748 |
| 11Nov2011 | 5673  | 741.38  | -23.1647 | 2 K.FPENRHI+ chr2@1477   | 1.66E-10 | 0.004705 |
| 11Nov2011 | 21518 | 895     | -10.9918 | 2 K.M+15.99 chrX@1449    | 3.41E-10 | 0.00883  |
| 11Nov2011 | 24365 | 1377.33 | 23.55482 | 3 P.PM+15.9 Splice@chr   | 1.87E-12 | 0        |
| 11Nov2011 | 13915 | 974.46  | -7.21565 | 1 R.M+15.99 chr4@8791    | 3.30E-10 | 0.008578 |
| 11Nov2011 | 13798 | 1144.59 | -9.69022 | 2 K.NVDNAPI chr3@1362    | 3.23E-10 | 0.008578 |
| 11Nov2011 | 9508  | 566.31  | 21.45326 | 2 R.EVAQLEC chr5@1706    | 7.33E-11 | 0.002061 |
| 11Nov2011 | 2980  | 1069.49 | 3.915799 | 2 R.SEQQSM chr3@1199     | 1.09E-14 | 0        |
| 11Nov2011 | 5874  | 936.48  | 27.86052 | 1 K.LNGGYEC chr2@1191    | 4.83E-11 | 0.001156 |
| 11Nov2011 | 3458  | 412.23  | 25.3069  | 2 R.IASYQGG chrX@1679    | 1.97E-10 | 0.005456 |
| 11Nov2011 | 23079 | 1003.19 | 17.13413 | 3 R.CWNRRA Splice@chr    | 1.79E-12 | 0        |
| 11Nov2011 | 24099 | 792.15  | -18.5783 | 4 K.SGTIFDNI Splice@chr  | 3.53E-17 | 0        |
| 11Nov2011 | 24108 | 792.15  | -18.5783 | 4 K.SGTIFDNI Splice@chr  | 3.00E-18 | 0        |
| 11Nov2011 | 11259 | 625.82  | -20.2839 | 2 R.K+14.016 chrX@1356   | 3.19E-10 | 0.008578 |
| 11Nov2011 | 24026 | 975.81  | -5.15613 | 3 K.SGTIFDNI Splice@chr  | 5.05E-12 | 1.18E-04 |
| 11Nov2011 | 5382  | 876.4   | -19.8707 | 1 K.TEDEARR chrX@1138    | 3.73E-10 | 0.009641 |
| 11Nov2011 | 11537 | 1130.64 | 3.300733 | 1 R.ISLTNANI chr5@7795   | 3.26E-10 | 0.008578 |
| 11Nov2011 | 13971 | 974.46  | -7.21565 | 1 R.M+15.99 chr4@8791    | 2.25E-10 | 0.006182 |

|           |       |         |          |                         |          |          |
|-----------|-------|---------|----------|-------------------------|----------|----------|
| 11Nov2011 | 24717 | 1147.25 | 13.44098 | 3 R.FQSAAIG Splice@chr  | 3.45E-14 | 0        |
| 11Nov2011 | 3502  | 412.23  | 25.3069  | 2 R.IASYQGG chrX@1679   | 3.37E-11 | 9.64E-04 |
| 11Nov2011 | 4826  | 431.74  | 5.455516 | 2 _PIQDVYK Splice@chr   | 1.90E-10 | 0.005175 |
| 11Nov2011 | 23394 | 1330.17 | 27.12755 | 2 F.YEEMDYI Splice@chr  | 3.11E-10 | 0.008341 |
| 11Nov2011 | 3581  | 851.45  | 27.84704 | 1 R.FAGNSVE chr4@1640   | 2.46E-10 | 0.006642 |
| 11Nov2011 | 3274  | 710.86  | 21.23823 | 2 R.DSTQKW chr3@1337    | 1.44E-11 | 4.41E-04 |
| 11Nov2011 | 24119 | 792.15  | -18.5783 | 4 K.SGTIFDNI Splice@chr | 1.59E-18 | 0        |
| 11Nov2011 | 6506  | 1107.56 | -21.6943 | 1 _SSLDKES chr5@1239    | 8.21E-11 | 0.002355 |
| 11Nov2011 | 23027 | 1003.52 | 12.6889  | 3 R.CWNRRA Splice@chr   | 2.79E-11 | 6.52E-04 |
| 11Nov2011 | 18705 | 1034.57 | -2.45085 | 2 K.FK+14.01 Splice@chr | 5.53E-12 | 1.18E-04 |
| 11Nov2011 | 6231  | 626.3   | -9.76097 | 2 R.LCESGAA Splice@chr  | 1.54E-15 | 0        |
| 11Nov2011 | 4516  | 1087.57 | -26.0294 | 1 R.FDLKPQN Splice@chr  | 2.65E-10 | 0.007184 |
| 11Nov2011 | 16665 | 687.41  | 21.43028 | 2 E.M+15.99 chr2@8546   | 3.06E-10 | 0.008341 |
| 11Nov2011 | 6179  | 626.3   | -9.76097 | 2 R.LCESGAA Splice@chr  | 5.68E-16 | 0        |
| 11Nov2011 | 21717 | 1031.02 | -27.5956 | 2 K.FQFYEK chr1@4342    | 8.31E-11 | 0.002355 |
| 11Nov2011 | 2943  | 710.86  | 21.23823 | 2 R.DSTQKW chr3@1337    | 3.21E-10 | 0.008578 |
| 11Nov2011 | 24012 | 975.81  | -5.15613 | 3 K.SGTIFDNI Splice@chr | 2.37E-10 | 0.006454 |
| 11Nov2011 | 6452  | 1107.56 | -21.6943 | 1 _SSLDKES chr5@1239    | 1.57E-11 | 4.41E-04 |
| 11Nov2011 | 4446  | 833.46  | -4.25508 | 1 R.DMVQLV chrX@9811    | 2.88E-10 | 0.007903 |
| 11Nov2011 | 11521 | 565.82  | -3.62141 | 2 R.ISLTNANI chr5@7795  | 1.80E-10 | 0.004897 |
| 11Nov2011 | 9226  | 559.79  | 11.35993 | 2 R.DGWSIG chr4@4255    | 2.07E-10 | 0.005919 |
| 11Nov2011 | 5820  | 936.48  | 27.86052 | 1 K.LNGGYEC chr2@1191   | 4.08E-11 | 0.001058 |
| 11Nov2011 | 3071  | 710.86  | 21.23823 | 2 R.DSTQKW chr3@1337    | 7.22E-12 | 5.13E-04 |
| 11Nov2011 | 1292  | 632.78  | -25.4076 | 2 _KM+15.9 Splice@chr   | 1.64E-10 | 0.004454 |
| 11Nov2011 | 1905  | 444.25  | -3.23598 | 2 R.AELSSRPI chr3@8104  | 2.79E-10 | 0.008403 |
| 11Nov2011 | 5598  | 936.48  | 27.86052 | 1 K.LNGGYEC chr2@1191   | 1.19E-10 | 0.00344  |
| 11Nov2011 | 22525 | 792.16  | -5.99938 | 4 K.SGTIFDNI Splice@chr | 4.63E-18 | 0        |
| 11Nov2011 | 556   | 702.38  | 2.001521 | 1 _DAAGLAC chr3@2528    | 5.12E-12 | 5.13E-04 |
| 11Nov2011 | 11838 | 467.93  | -25.8815 | 3 R.FLKISLES chr5@3919  | 1.61E-10 | 0.004454 |
| 11Nov2011 | 8523  | 559.79  | 11.35993 | 2 R.DGWSIG chr4@4255    | 2.53E-10 | 0.007944 |
| 11Nov2011 | 2920  | 1069.49 | 3.915799 | 2 R.SEQQSM chr3@1199    | 3.56E-13 | 0        |
| 11Nov2011 | 8684  | 1161.68 | -2.15604 | 1 K.NSKDKLV Splice@chr  | 1.34E-10 | 0.003851 |
| 11Nov2011 | 10554 | 625.82  | -20.2839 | 2 R.K+14.016 chrX@1356  | 1.78E-10 | 0.005077 |
| 11Nov2011 | 5444  | 741.39  | -17.2291 | 2 K.QKSNWH chr5@1229    | 3.01E-11 | 7.13E-04 |
| 11Nov2011 | 5319  | 604.31  | 24.98924 | 2 K.ERDRYSP chr5@7314   | 1.28E-10 | 0.003851 |
| 11Nov2011 | 3296  | 412.23  | 25.3069  | 2 R.IASYQGG chrX@1679   | 3.07E-11 | 7.13E-04 |
| 11Nov2011 | 2009  | 444.25  | -3.23598 | 2 R.AELSSRPI chr3@8104  | 1.75E-10 | 0.004758 |
| 11Nov2011 | 563   | 703.38  | -2.78167 | 1 _DAAGLAC chr3@2528    | 5.21E-12 | 5.13E-04 |
| 11Nov2011 | 8989  | 566.31  | 21.45326 | 2 R.EVAQLEC chr5@1706   | 5.30E-11 | 0.001163 |
| 11Nov2011 | 6159  | 1141.1  | -18.7175 | 2 V.KLIGTDPI Splice@chr | 2.61E-10 | 0.008013 |
| 11Nov2011 | 8629  | 1161.66 | -19.4191 | 1 K.NSKDKLV chr5@1250   | 1.64E-10 | 0.004454 |
| 11Nov2011 | 7752  | 579.81  | -21.5115 | 2 _KIAESGSF chr4@1695   | 2.13E-10 | 0.006418 |
| 11Nov2011 | 13264 | 974.46  | -7.21565 | 1 R.M+15.99 chr4@8791   | 1.42E-10 | 0.004061 |
| 11Nov2011 | 3375  | 851.45  | 27.84704 | 1 R.FAGNSVE chr4@1640   | 7.66E-11 | 0.001705 |
| 11Nov2011 | 9055  | 622.65  | 20.40203 | 3 K.QIEQGEA Splice@chr  | 2.62E-10 | 0.008013 |
| 11Nov2011 | 8770  | 559.79  | 11.35993 | 2 R.DGWSIG chr4@4255    | 3.06E-10 | 0.009386 |
| 11Nov2011 | 22734 | 1377    | 26.85161 | 3 P.PM+15.9 Splice@chr  | 1.32E-10 | 0.003851 |

|           |       |         |          |                          |          |          |
|-----------|-------|---------|----------|--------------------------|----------|----------|
| 11Nov2011 | 11496 | 781.41  | -6.726   | 2 K.ALEKEDIF chr1@1462   | 1.43E-14 | 0        |
| 11Nov2011 | 20463 | 1044.57 | 2.487942 | 2 R.SQLQTEV Splice@chr   | 8.01E-22 | 0        |
| 11Nov2011 | 20124 | 895.5   | -12.868  | 2 K.M+15.99 chrX@1449    | 1.42E-12 | 1.42E-04 |
| 11Nov2011 | 3115  | 710.86  | 21.23823 | 2 R.DSTQKW chr3@1337     | 5.98E-11 | 0.001385 |
| 11Nov2011 | 19110 | 843.45  | -16.7082 | 2 K.KMFPEKI chr1@3802    | 9.68E-11 | 0.002355 |
| 11Nov2011 | 10983 | 565.83  | 14.11658 | 2 R.ISLTNANI chr5@7793   | 1.09E-10 | 0.002792 |
| 11Nov2011 | 2856  | 1069.49 | 3.915799 | 2 R.SEQQSM chr3@1199     | 8.87E-14 | 0        |
| 11Nov2011 | 8387  | 1025.61 | -11.6755 | 1 K.LGLGSGI chr5@4945    | 7.86E-12 | 5.13E-04 |
| 11Nov2011 | 15672 | 687.41  | 21.43028 | 2 E.M+15.99 chr2@8546    | 1.37E-10 | 0.003851 |
| 11Nov2011 | 2767  | 439.74  | 18.7116  | 2 R.SIAMFGP chr2@4157    | 3.15E-11 | 7.13E-04 |
| 11Nov2011 | 19476 | 1061.57 | -13.5816 | 2 S.FAK+14.0 chr5@2472   | 2.46E-10 | 0.007533 |
| 11Nov2011 | 5132  | 876.41  | -8.50606 | 1 K.TEDEARR chrX@1138    | 1.58E-10 | 0.004454 |
| 11Nov2011 | 2792  | 710.86  | 21.23823 | 2 R.DSTQKW chr3@1337     | 3.23E-10 | 0.009878 |
| 11Nov2011 | 2863  | 1068.99 | 5.486428 | 2 R.SEQQSM chr3@1199     | 1.45E-14 | 0        |
| 11Nov2011 | 2861  | 615.8   | -16.0827 | 2 _QLEISFDI Splice@chr   | 3.09E-11 | 7.13E-04 |
| 11Nov2011 | 6172  | 1107.56 | -21.6943 | 1 _SSLDKESC chr5@1239    | 6.04E-11 | 0.001385 |
| 11Nov2011 | 3257  | 412.23  | 25.3069  | 2 R.IASYQGG chrX@1679    | 4.71E-11 | 9.37E-04 |
| 11Nov2011 | 20224 | 1216.59 | -11.6275 | 2 L.RNTRNDI chr4@1012    | 3.22E-10 | 0.009789 |
| 11Nov2011 | 205   | 848.41  | 2.093776 | 1 R.EEAELEK chr2@4805    | 2.25E-10 | 0.006716 |
| 11Nov2011 | 5657  | 936.48  | 27.86052 | 1 K.LNGGYEC chr2@1191    | 4.63E-11 | 9.37E-04 |
| 11Nov2011 | 2292  | 778.38  | -6.0874  | 2 K.IEKEM+1 Splice@chr   | 1.03E-10 | 0.002461 |
| 11Nov2011 | 20060 | 826.47  | -25.8785 | 2 R.RVPLPEG Splice@chr   | 6.84E-14 | 0        |
| 11Nov2011 | 26194 | 957.5   | 1.956888 | 3 R.FIEPIEDIF Splice@chr | 1.35E-10 | 0.004193 |
| 11Nov2011 | 10042 | 566.31  | 21.45326 | 2 R.EVAQLEC chr5@1706    | 1.55E-10 | 0.004389 |
| 11Nov2011 | 24091 | 1133.59 | -6.23448 | 3 K.HQLVSAF Splice@chr   | 3.10E-13 | 0        |
| 11Nov2011 | 5374  | 685.37  | -27.0225 | 2 K.ISTQTHIC chr4@7638   | 2.69E-10 | 0.006812 |
| 11Nov2011 | 16574 | 894.41  | 13.57006 | 2 _FDSDDVT Splice@chr    | 3.96E-10 | 0.009032 |
| 11Nov2011 | 18080 | 687.41  | 21.43028 | 2 E.M+15.99 chr2@8546    | 1.48E-10 | 0.004256 |
| 11Nov2011 | 27587 | 1216.58 | -19.8654 | 2 L.RNTRNDI chr4@1012    | 3.75E-10 | 0.008721 |
| 11Nov2011 | 30390 | 1277.67 | 3.563978 | 2 R.DGSWVIL Splice@chr   | 2.85E-13 | 0        |
| 11Nov2011 | 9842  | 559.79  | 11.35993 | 2 R.DGWSIGI chr4@4253    | 6.89E-11 | 0.002214 |
| 11Nov2011 | 4617  | 921.52  | 19.51785 | 1 R.MRITNAS chrX@1004    | 3.40E-10 | 0.007747 |
| 11Nov2011 | 9768  | 1089.65 | -29.1532 | 1 K.KLKSMKI chr5@3701    | 3.66E-10 | 0.008395 |
| 11Nov2011 | 19410 | 990.49  | -21.8765 | 2 F.RLSESELE chr4@7519   | 1.30E-10 | 0.00408  |
| 11Nov2011 | 5537  | 876.41  | -8.50606 | 1 K.TEDEARR chrX@1138    | 1.63E-10 | 0.004516 |
| 11Nov2011 | 237   | 848.41  | 2.093776 | 1 R.EEAELEK chr2@4805    | 2.25E-10 | 0.005491 |
| 11Nov2011 | 3482  | 412.23  | 25.3069  | 2 R.IASYQGG chrX@1679    | 1.21E-10 | 0.003876 |
| 11Nov2011 | 7832  | 524.26  | -17.4529 | 2 K.LWDNNE Splice@chr    | 1.50E-10 | 0.004256 |
| 11Nov2011 | 19891 | 826.47  | -25.8785 | 2 R.RVPLPEG Splice@chr   | 1.30E-13 | 0        |
| 11Nov2011 | 30370 | 1277.68 | 11.40766 | 2 R.DGSWVIL Splice@chr   | 6.63E-12 | 1.61E-04 |
| 11Nov2011 | 25945 | 1135.56 | 14.02138 | 2 _DMDYAFI Splice@chr    | 3.36E-11 | 6.87E-04 |
| 11Nov2011 | 1260  | 632.78  | -25.4076 | 2 _KM+15.9 Splice@chr    | 2.51E-10 | 0.006495 |
| 11Nov2011 | 20006 | 826.47  | -25.8785 | 2 R.RVPLPEG Splice@chr   | 2.61E-13 | 0        |
| 11Nov2011 | 23945 | 1133.59 | -6.23448 | 3 K.HQLVSAF Splice@chr   | 3.34E-15 | 0        |
| 11Nov2011 | 10103 | 566.31  | 21.45326 | 2 R.EVAQLEC chr5@1706    | 3.79E-11 | 8.37E-04 |
| 11Nov2011 | 6783  | 1107.56 | -21.6943 | 1 _SSLDKESC chr5@1239    | 5.29E-11 | 0.001343 |
| 11Nov2011 | 18884 | 664.7   | 1.197202 | 3 _PTLNK+1 chr1@6526     | 3.43E-10 | 0.007747 |

|           |       |         |          |                         |          |          |
|-----------|-------|---------|----------|-------------------------|----------|----------|
| 11Nov2011 | 12112 | 565.83  | 14.11658 | 2 R.ISLTNANI chr5@7795  | 4.18E-10 | 0.009475 |
| 11Nov2011 | 28953 | 963.13  | 15.42179 | 3 _GCSIVPIS Splice@chr  | 5.41E-11 | 0.001343 |
| 11Nov2011 | 4234  | 864.38  | 14.63385 | 1 R.EDWGM chr5@6657     | 4.20E-10 | 0.009475 |
| 11Nov2011 | 12097 | 574.8   | 12.19222 | 2 R.WEVTSE( chr5@1925   | 4.48E-10 | 0.009972 |
| 11Nov2011 | 18025 | 687.41  | 21.43028 | 2 E.M+15.99 chr2@8546   | 1.20E-10 | 0.003876 |
| 11Nov2011 | 18537 | 685.88  | 4.188613 | 2 K.IVPGGGA chrX@1570   | 4.89E-13 | 0        |
| 11Nov2011 | 8777  | 673.32  | -3.13278 | 2 R.QEM+15. chr3@1026   | 2.83E-10 | 0.007001 |
| 11Nov2011 | 429   | 722.35  | 3.723    | 1 R.FQGGGEI chr1@2595   | 3.38E-10 | 0.007687 |
| 11Nov2011 | 22961 | 831.45  | -1.72693 | 2 R.NTRNQLf chrX@7297   | 3.33E-10 | 0.007687 |
| 11Nov2011 | 24037 | 1133.59 | -6.23448 | 3 K.HQLVSAF Splice@chr  | 7.12E-12 | 1.61E-04 |
| 11Nov2011 | 20052 | 1034.57 | -2.45085 | 2 K.FK+14.01 Splice@chr | 1.17E-11 | 1.61E-04 |
| 11Nov2011 | 29666 | 1114.08 | -27.2909 | 2 _TVLQTAC chr5@1395    | 4.46E-10 | 0.009972 |
| 11Nov2011 | 2326  | 778.37  | -18.9721 | 2 K.IEKEM+1 Splice@chr  | 3.20E-10 | 0.007495 |
| 11Nov2011 | 5614  | 604.31  | 24.98924 | 2 K.ERDRYSP chr5@7314   | 4.44E-10 | 0.009847 |
| 11Nov2011 | 23602 | 1044.57 | 2.487942 | 2 R.SLQTEV Splice@chr   | 6.80E-21 | 0        |
| 11Nov2011 | 19837 | 826.47  | -25.8785 | 2 R.RVPLPEG Splice@chr  | 8.62E-14 | 0        |
| 11Nov2011 | 12159 | 565.83  | 14.11658 | 2 R.ISLTNANI chr5@7795  | 2.36E-10 | 0.00596  |
| 11Nov2011 | 27401 | 1272.28 | 27.03865 | 3 K.FAVADEE Splice@chr  | 7.99E-13 | 0        |
| 11Nov2011 | 12208 | 565.83  | 14.11658 | 2 R.ISLTNANI chr5@7795  | 3.82E-10 | 0.008911 |
| 11Nov2011 | 27834 | 786.92  | 22.65468 | 2 K.ERSNFSK Splice@chr  | 4.48E-10 | 0.009972 |
| 11Nov2011 | 25031 | 1003.19 | 17.13413 | 3 R.CWNRRA Splice@chr   | 1.39E-11 | 2.38E-04 |
| 11Nov2011 | 5072  | 537.8   | -5.57144 | 2 K.DQGMLN chr5@2025    | 2.88E-10 | 0.00712  |
| 11Nov2011 | 23276 | 1216.58 | -19.8654 | 2 L.NRTRNDI chr4@1012   | 2.93E-10 | 0.00712  |
| 11Nov2011 | 10717 | 993.54  | 3.074729 | 1 _SSLFVD( chrX@1374    | 3.22E-10 | 0.007495 |
| 11Nov2011 | 11874 | 533.82  | -1.88988 | 2 K.NTVLKYT Splice@chr  | 1.23E-10 | 0.004014 |
| 11Nov2011 | 14554 | 691.85  | 23.12212 | 2 _M+15.99 chr5@1026    | 3.86E-10 | 0.008976 |
| 11Nov2011 | 23536 | 1044.57 | 2.487942 | 2 R.SLQTEV Splice@chr   | 8.61E-22 | 0        |
| 11Nov2011 | 24665 | 746.38  | 17.50532 | 3 R.IFDTNNK chr4@1514   | 3.03E-11 | 6.13E-04 |
| 11Nov2011 | 23154 | 895     | -10.9918 | 2 K.M+15.99 chrX@1445   | 2.95E-10 | 0.00712  |
| 11Nov2011 | 6726  | 1107.56 | -21.6943 | 1 _SSLDKES( chr5@1235   | 1.61E-11 | 2.38E-04 |
| 11Nov2011 | 20609 | 849.92  | 6.583873 | 2 Q.DSSYFVE Splice@chr  | 3.05E-13 | 0        |
| 11Nov2011 | 6004  | 936.48  | 27.86052 | 1 K.LNGGYEC chr2@1191   | 1.15E-10 | 0.003809 |
| 11Nov2011 | 6839  | 463.77  | 1.18704  | 2 K.PVNIENLI chrX@1210  | 1.28E-10 | 0.00408  |
| 11Nov2011 | 29299 | 1147.24 | 4.705638 | 3 R.FQSAAIG Splice@chr  | 1.04E-14 | 0        |
| 11Nov2011 | 621   | 702.38  | 2.001521 | 1 _DAAGLAC chr3@2528    | 5.12E-12 | 8.39E-05 |
| 11Nov2011 | 628   | 703.38  | -2.78167 | 1 _DAAGLAC chr3@2528    | 5.21E-12 | 8.39E-05 |
| 11Nov2011 | 16365 | 759.88  | -7.28215 | 2 S.IDQLQLA chr1@8550   | 4.44E-10 | 0.009847 |
| 11Nov2011 | 17453 | 719.39  | 28.86707 | 2 R.FTQAGSE Splice@chr  | 1.33E-13 | 0        |
| 11Nov2011 | 27078 | 692.88  | -15.9671 | 2 A.SRLFIFVN Splice@chr | 1.78E-10 | 0.004782 |
| 11Nov2011 | 22298 | 853.45  | -23.3178 | 2 K.NFKINSKI chr4@5815  | 4.44E-10 | 0.009847 |
| 11Nov2011 | 19949 | 826.47  | -25.8785 | 2 R.RVPLPEG Splice@chr  | 1.12E-13 | 0        |
| 11Nov2011 | 16337 | 717.88  | 5.023339 | 2 R.LNIAMN\ Splice@chr  | 3.37E-10 | 0.007687 |
| 11Nov2011 | 27494 | 1272.28 | 27.03865 | 3 K.FAVADEE Splice@chr  | 3.31E-12 | 8.39E-05 |
| 11Nov2011 | 6537  | 514.31  | -21.8382 | 2 R.KTVVLQC chrX@1237   | 3.57E-10 | 0.008131 |
| 11Nov2011 | 5891  | 741.38  | -23.1647 | 2 K.FPENRHI chr2@1477   | 1.90E-10 | 0.004961 |
| 11Nov2011 | 10257 | 1064.58 | -2.00842 | 1 K.YLINGNEI chr1@8687  | 6.08E-11 | 0.001706 |
| 11Nov2011 | 9788  | 559.79  | 11.35993 | 2 R.DGWSIG( chr4@4255   | 1.11E-10 | 0.003671 |

|           |       |         |          |                          |          |          |
|-----------|-------|---------|----------|--------------------------|----------|----------|
| 11Nov2011 | 26771 | 741.87  | -26.1725 | 2 K.KIFLQM+ chr2@1507    | 2.85E-10 | 0.007059 |
| 11Nov2011 | 17508 | 719.38  | 14.92317 | 2 R.FTQAGSE Splice@chr   | 1.90E-13 | 0        |
| 11Nov2011 | 9515  | 559.79  | 11.35993 | 2 R.DGWSIG( chr4@4255    | 4.30E-10 | 0.009525 |
| 11Nov2011 | 7893  | 505.93  | 21.00865 | 3 K.DAGFDPI chr1@3577    | 4.57E-11 | 0.001203 |
| 11Nov2011 | 10626 | 821.44  | 15.92055 | 1 K.TGFGING chrX@2647    | 3.80E-10 | 0.008786 |
| 11Nov2011 | 25455 | 1024.52 | -27.8903 | 2 F.K+14.016 chr4@8225   | 2.12E-10 | 0.005221 |
| 11Nov2011 | 10202 | 1064.58 | -2.00842 | 1 K.YLINGNEI chr1@8687   | 1.27E-10 | 0.00408  |
| 11Nov2011 | 27442 | 954.46  | 24.98958 | 4 K.FAVADEE Splice@chr   | 1.90E-11 | 3.94E-04 |
| 11Nov2011 | 17772 | 887.93  | 29.43791 | 2 I.DEREESTM Splice@chr  | 1.40E-10 | 0.004193 |
| 11Nov2011 | 19364 | 833.42  | -19.2103 | 2 _..IIEPYVAM Splice@chr | 4.65E-11 | 0.001203 |
| 11Nov2011 | 22892 | 916.97  | -24.7667 | 2 K.SRKAKKD Splice@chr   | 3.68E-10 | 0.008523 |
| 11Nov2011 | 17063 | 1075.05 | -16.1169 | 2 R.TCSK+14. chr2@1255   | 2.20E-10 | 0.005287 |
| 11Nov2011 | 23881 | 1133.59 | -6.23448 | 3 K.HQLVSAF Splice@chr   | 7.56E-15 | 0        |
| 11Nov2011 | 13413 | 943.57  | -2.9787  | 1 _..SPLFVPKI chrX@4402  | 3.06E-10 | 0.006531 |
| 11Nov2011 | 19066 | 849.93  | 18.38221 | 2 Q.DSSYFVE Splice@chr   | 5.24E-11 | 0.001316 |
| 11Nov2011 | 375   | 722.35  | 3.723    | 1 R.FQGGGEI chr1@2595    | 3.38E-10 | 0.006973 |
| 11Nov2011 | 15305 | 893.91  | 15.44868 | 2 _..FSDDDVT Splice@chr  | 3.81E-10 | 0.007964 |
| 11Nov2011 | 19289 | 549.3   | 19.70379 | 2 R.FDVIFNV chrX@5111    | 6.47E-11 | 0.001563 |
| 11Nov2011 | 19834 | 1275.6  | -25.4649 | 3 R.YSSECPE( Splice@chr  | 7.56E-11 | 0.001978 |
| 11Nov2011 | 18471 | 826.48  | -13.7526 | 2 R.RVPLPEG Splice@chr   | 1.22E-13 | 0        |
| 11Nov2011 | 4237  | 833.46  | -4.25508 | 1 R.DMVQLV chrX@9811     | 3.09E-10 | 0.006531 |
| 11Nov2011 | 20468 | 853.45  | -23.3178 | 2 K.NFKINSKI chr4@5815   | 3.46E-10 | 0.007044 |
| 11Nov2011 | 21202 | 831.45  | -1.72693 | 2 R.NTRNQLI chrX@7297    | 3.11E-10 | 0.006531 |
| 11Nov2011 | 16641 | 687.41  | 21.43028 | 2 E.M+15.99 chr2@8546    | 3.45E-10 | 0.007044 |
| 11Nov2011 | 24812 | 1027.6  | -14.245  | 2 I.KNELKSKA chrX@6127   | 4.08E-10 | 0.009036 |
| 11Nov2011 | 21712 | 1044.07 | 4.096092 | 2 R.SQLQTEV Splice@chr   | 8.63E-22 | 0        |
| 11Nov2011 | 545   | 702.38  | 2.001521 | 1 _..DAAGLAC chr3@2528   | 5.12E-12 | 1.95E-04 |
| 11Nov2011 | 9210  | 566.31  | 21.45326 | 2 R.EVAQLEC chr5@1706    | 7.84E-11 | 0.00206  |
| 11Nov2011 | 6118  | 516.78  | -6.8089  | 2 R.LNMAEN chr4@7815     | 3.56E-10 | 0.007194 |
| 11Nov2011 | 10960 | 625.82  | -20.2839 | 2 R.K+14.016 chrX@1356   | 5.38E-11 | 0.001402 |
| 11Nov2011 | 15843 | 893.9   | 4.30649  | 2 _..FSDDDVT Splice@chr  | 1.59E-10 | 0.003217 |
| 11Nov2011 | 4762  | 433.76  | 2.609238 | 2 _..IVDLPGPI chr3@1104  | 5.05E-11 | 0.001316 |
| 11Nov2011 | 6191  | 1107.56 | -21.6943 | 1 _..SSLDKES( chr5@1235  | 1.94E-11 | 6.35E-04 |
| 11Nov2011 | 22849 | 1384.75 | 16.84983 | 1 K.FQNFAQI chr2@2226    | 2.52E-10 | 0.005711 |
| 11Nov2011 | 9618  | 724.35  | 19.12636 | 3 V.CLTEEGK Splice@chr   | 9.88E-11 | 0.002289 |
| 11Nov2011 | 16565 | 623.03  | -18.2266 | 3 P.RNWGKC chrX@1446     | 4.19E-10 | 0.009167 |
| 11Nov2011 | 3519  | 1059.54 | -17.6437 | 1 _..YDHKNAI chr5@1738   | 4.18E-10 | 0.009167 |
| 11Nov2011 | 8849  | 739.4   | 18.15789 | 2 K.M+15.99 chr5@5476    | 2.36E-10 | 0.005424 |
| 11Nov2011 | 7563  | 434.24  | 13.9946  | 3 _..RSNDQTI chr5@6378   | 3.79E-10 | 0.007886 |
| 11Nov2011 | 26736 | 506.57  | 1.126789 | 3 _..DWHHTF Splice@chr   | 4.50E-12 | 1.00E-04 |
| 11Nov2011 | 14533 | 1106.58 | 8.124787 | 1 K.NLVCKQE chr5@1606    | 1.09E-10 | 0.002446 |
| 11Nov2011 | 22885 | 1063.53 | -29.6243 | 2 S.CKCSKNC chr4@7024    | 3.43E-11 | 8.93E-04 |
| 11Nov2011 | 3819  | 403.23  | 10.8661  | 2 R.AMVASG chr5@1721     | 5.82E-11 | 0.001563 |
| 11Nov2011 | 9272  | 566.31  | 21.45326 | 2 R.EVAQLEC chr5@1706    | 3.08E-11 | 7.20E-04 |
| 11Nov2011 | 15021 | 717.88  | 5.023339 | 2 R.LNIAMN\ Splice@chr   | 6.94E-11 | 0.00173  |
| 11Nov2011 | 8630  | 1025.61 | -11.6755 | 1 K.LGLGSGL chr5@4945    | 9.90E-12 | 2.85E-04 |
| 11Nov2011 | 12581 | 1345.63 | -24.7692 | 2 _..QVREMH Splice@chr   | 4.05E-11 | 0.001154 |

|           |       |         |          |                          |          |          |
|-----------|-------|---------|----------|--------------------------|----------|----------|
| 11Nov2011 | 14966 | 717.88  | 5.023339 | 2 R.LNIAMN\ Splice@chr   | 2.46E-10 | 0.005711 |
| 11Nov2011 | 5430  | 741.38  | -23.1647 | 2 K.FPENRHI\ chr2@1477   | 3.50E-10 | 0.007194 |
| 11Nov2011 | 13790 | 974.46  | -7.21565 | 1 R.M+15.99 chr4@8791    | 4.95E-11 | 0.001316 |
| 11Nov2011 | 17106 | 685.88  | 4.188613 | 2 K.IVPGGGA chrX@1570    | 9.38E-14 | 0        |
| 11Nov2011 | 5118  | 1274.07 | 6.16406  | 2 L.EDESAAV Splice@chr   | 1.60E-10 | 0.003217 |
| 11Nov2011 | 7230  | 505.93  | 21.00865 | 3 K.DAGFDPI chr1@3577    | 2.27E-10 | 0.005029 |
| 11Nov2011 | 23015 | 1063.53 | -29.6243 | 2 S.CKCSKNC chr4@7024    | 2.60E-10 | 0.005711 |
| 11Nov2011 | 7817  | 493.78  | -11.3951 | 2 R.KNQENLI Splice@chr   | 2.16E-10 | 0.004796 |
| 11Nov2011 | 12847 | 430.76  | 3.408589 | 2 R.SILSEIAK. Splice@chr | 4.44E-10 | 0.009606 |
| 11Nov2011 | 5066  | 1274.08 | 14.02996 | 2 L.EDESAAV Splice@chr   | 3.99E-10 | 0.008809 |
| 11Nov2011 | 16508 | 622.7   | -11.061  | 3 P.RNWGKG chrX@1446     | 1.49E-10 | 0.002989 |
| 11Nov2011 | 24045 | 914.48  | -9.75514 | 2 K.HRCHKNI chr2@1129    | 1.03E-11 | 2.85E-04 |
| 11Nov2011 | 552   | 703.38  | -2.78167 | 1 _D.AAGLAC chr3@2528    | 5.21E-12 | 1.95E-04 |
| 11Nov2011 | 16088 | 719.38  | 14.92317 | 2 R.FTQAGSE Splice@chr   | 4.49E-13 | 0        |
| 11Nov2011 | 10018 | 993.54  | 3.074729 | 1 _SSLLFVDC chrX@1374    | 1.05E-10 | 0.002366 |
| 11Nov2011 | 25105 | 1377.31 | 9.123562 | 3 P.PM+15.9 Splice@chr   | 1.21E-11 | 2.85E-04 |
| 11Nov2011 | 18573 | 826.48  | -13.7526 | 2 R.RVPLPEG Splice@chr   | 1.18E-13 | 0        |
| 11Nov2011 | 18050 | 990.49  | -21.8765 | 2 F.RLSESELE chr4@7519   | 4.26E-10 | 0.00932  |
| 11Nov2011 | 17055 | 685.88  | 4.188613 | 2 K.IVPGGGA chrX@1570    | 5.24E-11 | 0.001316 |
| 11Nov2011 | 10249 | 784.46  | 12.38711 | 1 R.MKHGAL chr2@1770     | 2.14E-10 | 0.004796 |
| 11Nov2011 | 8981  | 559.79  | 11.35993 | 2 R.DGWSIGI chr4@4253    | 1.96E-10 | 0.004252 |
| 11Nov2011 | 11329 | 565.83  | 14.11658 | 2 R.ISLTNANI chr5@7793   | 4.09E-10 | 0.009036 |
| 11Nov2011 | 5036  | 685.38  | -12.3964 | 2 K.ISTQTHIC chr4@7638   | 1.29E-10 | 0.002752 |
| 11Nov2011 | 15213 | 894.41  | 13.57006 | 2 _FDSDDVT Splice@chr    | 2.67E-10 | 0.005864 |
| 11Nov2011 | 11278 | 565.83  | 14.11658 | 2 R.ISLTNANI chr5@7793   | 2.74E-10 | 0.005939 |
| 11Nov2011 | 215   | 848.41  | 2.093776 | 1 R.EEAELEK. chr2@4805   | 2.25E-10 | 0.004952 |
| 11Nov2011 | 8782  | 677.34  | -8.57314 | 2 K.MQQFSTI chr5@2080    | 2.42E-10 | 0.00558  |
| 11Nov2011 | 11384 | 565.83  | 14.11658 | 2 R.ISLTNANI chr5@7793   | 2.78E-10 | 0.006014 |
| 11Nov2011 | 18520 | 826.47  | -25.8785 | 2 R.RVPLPEG Splice@chr   | 1.34E-12 | 1.00E-04 |
| 11Nov2011 | 22233 | 889.95  | -19.8868 | 2 K.RSSVHTE chr2@8442    | 1.95E-10 | 0.004252 |
| 11Nov2011 | 25041 | 1000.51 | -15.4866 | 2 E.CLVVNLS Splice@chr   | 3.55E-11 | 8.93E-04 |
| 11Nov2011 | 15700 | 894.41  | 13.57006 | 2 _FDSDDVT Splice@chr    | 2.56E-11 | 6.35E-04 |
| 11Nov2011 | 9036  | 559.79  | 11.35993 | 2 R.DGWSIGI chr4@4253    | 4.40E-10 | 0.009606 |
| 11Nov2011 | 7092  | 693.87  | -6.6949  | 2 V.ICVAVGD chr5@1063    | 4.12E-10 | 0.009104 |
| 11Nov2011 | 19896 | 804.91  | 25.79416 | 2 _LTMTWN chr1@4513      | 3.64E-10 | 0.007503 |
| 11Nov2011 | 21219 | 521.3   | 24.95499 | 2 R.NLNEVEII chr4@1305   | 3.95E-10 | 0.008498 |
| 11Nov2011 | 16144 | 719.38  | 14.92317 | 2 R.FTQAGSE Splice@chr   | 3.40E-13 | 0        |
| 11Nov2011 | 21695 | 1044.57 | 2.487942 | 2 R.SQLQTEV Splice@chr   | 9.75E-21 | 0        |
| 11Nov2011 | 1342  | 632.78  | -25.4076 | 2 _KM+15.9 Splice@chr    | 2.59E-10 | 0.005711 |
| 11Nov2011 | 5127  | 876.41  | -8.50606 | 1 K.TEDEARR chrX@1138    | 3.20E-10 | 0.006596 |
| 11Nov2011 | 12417 | 1173.17 | -9.30319 | 3 K.PTMRTCC Splice@chr   | 2.50E-11 | 6.35E-04 |
| 11Nov2011 | 21458 | 1216.58 | -19.8654 | 2 L.RNTRNDI chr4@1012    | 1.60E-10 | 0.003217 |
| 11Nov2011 | 5588  | 936.48  | 27.86052 | 1 K.LNGGYEC chr2@1191    | 1.89E-10 | 0.004093 |
| 11Nov2011 | 6248  | 1107.56 | -21.6943 | 1 _SSLDKESC chr5@1239    | 2.94E-11 | 7.20E-04 |
| 11Nov2011 | 18423 | 826.47  | -25.8785 | 2 R.RVPLPEG Splice@chr   | 7.64E-14 | 0        |
| 11Nov2011 | 22872 | 1385.75 | 14.42536 | 1 K.FQNFQAI chr2@2226    | 7.96E-11 | 0.00206  |
| 11Nov2011 | 5475  | 741.38  | -23.1647 | 2 K.FPENRHI\ chr2@1477   | 4.90E-11 | 0.001316 |

|           |       |         |          |                         |          |          |
|-----------|-------|---------|----------|-------------------------|----------|----------|
| 11Nov2011 | 7513  | 434.24  | 13.9946  | 3 _RSNDQTI chr5@6378    | 2.68E-10 | 0.005864 |
| 11Nov2011 | 3987  | 864.38  | 14.63385 | 1 R.EDWGM chr5@6657     | 4.61E-11 | 0.001316 |
| 11Nov2011 | 9370  | 1064.58 | -2.00842 | 1 K.YLINGNEI chr1@8687  | 9.53E-11 | 0.002206 |
| 11Nov2011 | 9394  | 1063.58 | 1.14882  | 1 K.YLINGNEI chr1@8687  | 3.42E-10 | 0.007044 |
| 11Nov2011 | 24570 | 904.42  | -16.6475 | 3 I.DFDFVM+ chr5@2090   | 3.92E-10 | 0.008423 |
| 11Nov2011 | 9459  | 559.79  | 11.35993 | 2 R.DGWSIG chr4@4253    | 2.26E-10 | 0.004215 |
| 11Nov2011 | 702   | 703.38  | -2.78167 | 1 _DAAGLAC chr3@2528    | 5.12E-12 | 2.70E-04 |
| 11Nov2011 | 27834 | 929.15  | -28.8338 | 3 R.KSTAKLK chr2@8593   | 2.38E-10 | 0.004276 |
| 11Nov2011 | 25812 | 980.05  | -22.3594 | 2 K.K+14.016 chrX@3807  | 8.71E-11 | 0.001266 |
| 11Nov2011 | 5941  | 741.38  | -23.1647 | 2 K.FPENRHI chr2@1477   | 4.20E-10 | 0.007954 |
| 11Nov2011 | 21464 | 1343.71 | -9.50592 | 1 _LFM+15.5 Splice@chr  | 4.92E-10 | 0.009249 |
| 11Nov2011 | 25713 | 957.16  | 16.76738 | 3 K.LFQVLQN Splice@chr  | 3.27E-10 | 0.005906 |
| 11Nov2011 | 22663 | 831.45  | -1.72693 | 2 R.NTRNQLF chrX@7297   | 2.06E-10 | 0.003782 |
| 11Nov2011 | 6144  | 936.48  | 27.86052 | 1 K.LNGGYEC chr2@1191   | 4.44E-11 | 7.35E-04 |
| 11Nov2011 | 5168  | 537.79  | -24.2187 | 2 K.DQGMLN chr5@2023    | 4.93E-11 | 8.06E-04 |
| 11Nov2011 | 12765 | 521.28  | 1.17314  | 3 K.ALEKEDIF chr1@1462  | 2.65E-12 | 1.93E-04 |
| 11Nov2011 | 8670  | 507.3   | -7.17287 | 2 K.IVEIDVLG chr5@1932  | 3.87E-10 | 0.007402 |
| 11Nov2011 | 8472  | 493.78  | -11.3951 | 2 R.KNQENLI Splice@chr  | 2.16E-10 | 0.004074 |
| 11Nov2011 | 27777 | 917.51  | 5.964791 | 2 _SIMSRLEI Splice@chr  | 4.34E-10 | 0.008303 |
| 11Nov2011 | 23656 | 1133.59 | -6.23448 | 3 K.HQLVSAF Splice@chr  | 8.10E-13 | 1.93E-04 |
| 11Nov2011 | 495   | 722.35  | 3.723    | 1 R.FQGGGEI chr1@2595   | 3.38E-10 | 0.006192 |
| 11Nov2011 | 497   | 723.35  | -0.92778 | 1 R.FQGGGEI chr1@2595   | 4.61E-10 | 0.0087   |
| 11Nov2011 | 10805 | 724.35  | 19.12636 | 3 V.CLTEEGK Splice@chr  | 8.97E-12 | 3.56E-04 |
| 11Nov2011 | 6257  | 471.79  | -5.7044  | 2 K.IKVNFPPI chr2@3034  | 1.09E-10 | 0.001716 |
| 11Nov2011 | 26923 | 954.46  | 24.98958 | 4 K.FAVADEE Splice@chr  | 4.14E-12 | 2.70E-04 |
| 11Nov2011 | 25726 | 914.48  | -9.75514 | 2 K.HRCHKNI chr2@1129   | 1.45E-11 | 4.21E-04 |
| 11Nov2011 | 11742 | 625.82  | -20.2839 | 2 R.K+14.016 chrX@1356  | 2.92E-10 | 0.005352 |
| 11Nov2011 | 23252 | 1044.07 | 4.096092 | 2 R.SLQLQTEV Splice@chr | 3.88E-20 | 0        |
| 11Nov2011 | 12752 | 781.41  | -6.726   | 2 K.ALEKEDIF chr1@1462  | 2.07E-13 | 0        |
| 11Nov2011 | 28475 | 860.69  | 14.08015 | 4 R.FQSAAIG Splice@chr  | 1.24E-13 | 0        |
| 11Nov2011 | 4737  | 1087.57 | -26.0294 | 1 R.FDLKPQN Splice@chr  | 2.13E-10 | 0.004074 |
| 11Nov2011 | 12208 | 1130.64 | 3.300733 | 1 R.ISLTNANI chr5@7793  | 3.32E-10 | 0.006049 |
| 11Nov2011 | 9282  | 1025.61 | -11.6755 | 1 K.LGLGSGL chr5@4945   | 3.35E-11 | 5.81E-04 |
| 11Nov2011 | 8419  | 493.78  | -11.3951 | 2 R.KNQENLI Splice@chr  | 5.40E-10 | 0.009922 |
| 11Nov2011 | 998   | 722.35  | 3.723    | 1 R.FQGGGEI chr1@2595   | 3.38E-10 | 0.006192 |
| 11Nov2011 | 1046  | 446.26  | 15.92188 | 2 R.KGGVSSC chr1@9115   | 4.48E-10 | 0.008647 |
| 11Nov2011 | 12118 | 565.83  | 14.11658 | 2 R.ISLTNANI chr5@7793  | 3.81E-10 | 0.007185 |
| 11Nov2011 | 9752  | 559.79  | 11.35993 | 2 R.DGWSIG chr4@4253    | 3.50E-10 | 0.006402 |
| 11Nov2011 | 19378 | 515.29  | -6.17134 | 3 K.PNFTVILS chr4@1642  | 2.33E-10 | 0.004276 |
| 11Nov2011 | 6205  | 471.79  | -5.7044  | 2 K.IKVNFPPI chr2@3034  | 2.13E-10 | 0.004074 |
| 11Nov2011 | 26972 | 1216.58 | -19.8654 | 2 L.RNTRNDI chr4@1012   | 4.06E-10 | 0.007749 |
| 11Nov2011 | 569   | 890.47  | 3.986903 | 1 R.SSTLQPEI chr3@3247  | 5.00E-10 | 0.009386 |
| 11Nov2011 | 5806  | 604.31  | 24.98924 | 2 K.ERDRYSP chr5@7314   | 3.22E-10 | 0.005838 |
| 11Nov2011 | 5373  | 761.39  | -21.1354 | 1 _NPISAMK chrX@8094    | 4.85E-10 | 0.009046 |
| 11Nov2011 | 7424  | 556.3   | 8.418136 | 2 R.AEADILEI chr1@1288  | 2.48E-10 | 0.004348 |
| 11Nov2011 | 23753 | 1133.59 | -6.23448 | 3 K.HQLVSAF Splice@chr  | 1.03E-12 | 1.93E-04 |
| 11Nov2011 | 1209  | 503.26  | 2.921613 | 2 K.KNGGEM chr4@8235    | 8.46E-12 | 2.70E-04 |

|           |       |         |          |                          |          |          |
|-----------|-------|---------|----------|--------------------------|----------|----------|
| 11Nov2011 | 7579  | 454.75  | 8.810814 | 2 K.TDLAYLG chr4@1545    | 3.67E-11 | 6.60E-04 |
| 11Nov2011 | 9413  | 752.88  | -14.2545 | 2 R.GKCNGG chr4@5126     | 1.85E-10 | 0.003636 |
| 11Nov2011 | 17158 | 719.39  | 28.86707 | 2 R.FTQAGSE Splice@chr   | 2.66E-13 | 0        |
| 11Nov2011 | 26324 | 1105.54 | 20.81581 | 2 I.IEGHMGK chr5@8927    | 3.98E-10 | 0.007605 |
| 11Nov2011 | 8952  | 868.42  | -0.63154 | 1 K.SSSGSLSS chr2@1132   | 2.13E-10 | 0.004074 |
| 11Nov2011 | 5581  | 531.28  | -25.5165 | 2 K.MPMGVt chr2@6727     | 8.36E-11 | 0.001108 |
| 11Nov2011 | 21563 | 1356.81 | 7.112854 | 1 W.FLLLRQv Splice@chr   | 5.39E-10 | 0.009922 |
| 11Nov2011 | 13814 | 430.76  | 3.408589 | 2 R.SILSEIAK. Splice@chr | 4.51E-10 | 0.008647 |
| 11Nov2011 | 27427 | 911.42  | 20.49399 | 2 _..PRM+15. Splice@chr  | 1.39E-10 | 0.002464 |
| 11Nov2011 | 18251 | 685.88  | 4.188613 | 2 K.IVPGGGA chrX@1570    | 5.17E-17 | 0        |
| 11Nov2011 | 10440 | 724.34  | 5.400383 | 3 V.CLTEEGK Splice@chr   | 5.08E-10 | 0.009595 |
| 11Nov2011 | 23005 | 1216.58 | -19.8654 | 2 L.RNTRNDt chr4@1012    | 1.75E-10 | 0.003048 |
| 11Nov2011 | 23706 | 1133.59 | -6.23448 | 3 K.HQLVSAF Splice@chr   | 1.53E-12 | 1.93E-04 |
| 11Nov2011 | 11054 | 784.46  | 12.38711 | 1 R.MKHGAL chr2@1770     | 4.59E-10 | 0.0087   |
| 11Nov2011 | 26864 | 968.13  | 18.26018 | 3 _..GCSIVPIS Splice@chr | 3.72E-10 | 0.006972 |
| 11Nov2011 | 9805  | 559.79  | 11.35993 | 2 R.DGWSIGt chr4@4255    | 3.14E-10 | 0.005773 |
| 11Nov2011 | 12176 | 565.83  | 14.11658 | 2 R.ISLTNANI chr5@7795   | 3.15E-10 | 0.005773 |
| 11Nov2011 | 18016 | 1344.68 | 23.62111 | 1 _..NSSFGFR Splice@chr  | 1.27E-10 | 0.002165 |
| 11Nov2011 | 10384 | 786.87  | -27.8038 | 2 S.WSTTSST chr1@6478    | 1.44E-10 | 0.002536 |
| 11Nov2011 | 19436 | 515.29  | -6.17134 | 3 K.PNFTVILS chr4@1642   | 4.66E-10 | 0.0087   |
| 11Nov2011 | 20314 | 849.93  | 18.38221 | 2 Q.DSSYFVE Splice@chr   | 5.16E-11 | 8.06E-04 |
| 11Nov2011 | 25749 | 957.5   | 1.956888 | 3 R.FIEPIEDIF Splice@chr | 4.78E-10 | 0.008978 |
| 11Nov2011 | 19868 | 1034.57 | -2.45085 | 2 K.FK+14.01 Splice@chr  | 7.32E-12 | 2.70E-04 |
| 11Nov2011 | 12236 | 565.83  | 14.11658 | 2 R.ISLTNANI chr5@7795   | 4.22E-10 | 0.008026 |
| 11Nov2011 | 10038 | 566.31  | 21.45326 | 2 R.EVAQLEC chr5@1706    | 1.18E-10 | 0.001944 |
| 11Nov2011 | 22934 | 1216.58 | -19.8654 | 2 L.RNTRNDt chr4@1012    | 2.17E-10 | 0.004147 |
| 11Nov2011 | 24529 | 1384.74 | 9.615872 | 1 K.FQNFQAI chr2@2226    | 4.55E-10 | 0.0087   |
| 11Nov2011 | 12811 | 781.41  | -6.726   | 2 K.ALEKEDIF chr1@1462   | 5.38E-16 | 0        |
| 11Nov2011 | 2812  | 731.41  | 21.89419 | 2 R.EELDSISL chr4@7427   | 3.28E-10 | 0.005906 |
| 11Nov2011 | 6766  | 1107.56 | -21.6943 | 1 _..SSLDKESC chr5@1239  | 1.18E-10 | 0.001944 |
| 11Nov2011 | 17221 | 719.39  | 28.86707 | 2 R.FTQAGSE Splice@chr   | 1.80E-13 | 0        |
| 11Nov2011 | 22658 | 940.97  | -5.03388 | 2 _..WYPEKDI chr3@8547   | 3.19E-10 | 0.005838 |
| 11Nov2011 | 21844 | 853.45  | -23.3178 | 2 K.NFKINSKI chr4@5819   | 2.28E-10 | 0.004276 |
| 11Nov2011 | 15228 | 851.48  | -15.2578 | 2 K.RGVRLSH chr2@2785    | 1.92E-10 | 0.003636 |
| 11Nov2011 | 13097 | 467.93  | -25.8815 | 3 R.FLKISLESt chr5@3919  | 3.54E-10 | 0.006473 |
| 11Nov2011 | 9617  | 1161.67 | -10.7876 | 1 K.NSKDKLV chr5@1250    | 1.89E-10 | 0.003636 |
| 11Nov2011 | 1002  | 403.23  | 10.8661  | 2 R.AMVASG chr5@1721     | 1.90E-11 | 4.21E-04 |
| 11Nov2011 | 6112  | 937.48  | 24.27422 | 1 K.LNGGYEC chr2@1191    | 2.08E-10 | 0.003932 |
| 11Nov2011 | 26883 | 1272.28 | 27.03865 | 3 K.FAVADEE Splice@chr   | 1.10E-14 | 0        |
| 11Nov2011 | 23802 | 1133.59 | -6.23448 | 3 K.HQLVSAF Splice@chr   | 2.68E-14 | 0        |
| 11Nov2011 | 11801 | 625.82  | -20.2839 | 2 R.K+14.016 chrX@1356   | 5.35E-10 | 0.009922 |
| 11Nov2011 | 5594  | 876.4   | -19.8707 | 1 K.TEDEARR chrX@1138    | 4.26E-11 | 7.35E-04 |
| 11Nov2011 | 22890 | 895     | -10.9918 | 2 K.M+15.99 chrX@1449    | 1.07E-10 | 0.001716 |
| 11Nov2011 | 17622 | 622.69  | -27.1617 | 3 P.RNWGKC chrX@1446     | 4.52E-10 | 0.008647 |
| 11Nov2011 | 6089  | 936.48  | 27.86052 | 1 K.LNGGYEC chr2@1191    | 4.12E-11 | 7.35E-04 |
| 11Nov2011 | 694   | 702.38  | 2.001521 | 1 _..DAAGLAC chr3@2528   | 5.12E-12 | 2.70E-04 |
| 11Nov2011 | 9987  | 566.31  | 21.45326 | 2 R.EVAQLEC chr5@1706    | 1.01E-10 | 0.001646 |

|           |       |         |          |                          |          |          |
|-----------|-------|---------|----------|--------------------------|----------|----------|
| 11Nov2011 | 27867 | 928.82  | -24.1202 | 3 R.KSTAKLK' chr2@8595   | 3.74E-10 | 0.007114 |
| 11Nov2011 | 28460 | 1147.24 | 4.705638 | 3 R.FQSAAIG Splice@chr   | 7.72E-15 | 0        |
| 11Nov2011 | 6823  | 1107.56 | -21.6943 | 1 _._SSLDKESC chr5@1239  | 6.65E-11 | 8.80E-04 |
| 11Nov2011 | 10791 | 1086.01 | 9.000639 | 2 V.CLTEEGK Splice@chr   | 1.15E-11 | 4.21E-04 |
| 11Nov2011 | 23790 | 889.95  | -19.8868 | 2 K.RSSVHTE chr2@8442    | 3.16E-10 | 0.005773 |
| 11Nov2011 | 5991  | 741.38  | -23.1647 | 2 K.FPENRHL chr2@1477    | 1.11E-10 | 0.001716 |
| 11Nov2011 | 4597  | 833.46  | -4.25508 | 1 R.DMVQLV chrX@9811     | 3.65E-10 | 0.006972 |
| 11Nov2011 | 19151 | 990.49  | -21.8765 | 2 F.RLSESELE chr4@7519   | 1.20E-10 | 0.001944 |
| 11Nov2011 | 23233 | 1044.57 | 2.487942 | 2 R.SQLQTEV Splice@chr   | 4.69E-21 | 0        |
| 11Nov2011 | 23857 | 1133.59 | -6.23448 | 3 K.HQLVSAF Splice@chr   | 1.91E-12 | 1.93E-04 |
| 11Nov2011 | 4494  | 837.45  | -19.6495 | 1 K.TYIVGQR chr4@5607    | 5.37E-10 | 0.009922 |
| 11Nov2011 | 17853 | 1090.53 | -18.1295 | 2 K.INGVTVA chr3@6296    | 2.00E-10 | 0.003831 |
| 11Nov2011 | 23686 | 792.16  | -5.99938 | 4 K.SGTIFDNI Splice@chr  | 3.00E-16 | 0        |
| 11Nov2011 | 177   | 848.41  | 2.093776 | 1 R.EEAELEK. chr2@4805   | 2.25E-10 | 0.004447 |
| 11Nov2011 | 5738  | 936.48  | 27.86052 | 1 K.LNGGYEC chr2@1191    | 2.25E-11 | 6.33E-04 |
| 11Nov2011 | 12597 | 559.32  | 28.75221 | 2 R.IGMDLM Splice@chr    | 2.89E-10 | 0.00575  |
| 11Nov2011 | 17958 | 515.29  | -6.17134 | 3 K.PNFTVILS chr4@1642   | 3.99E-10 | 0.008686 |
| 11Nov2011 | 24359 | 1147.26 | 22.17633 | 3 R.FQSAAIG Splice@chr   | 9.84E-14 | 0        |
| 11Nov2011 | 17760 | 990.49  | -21.8765 | 2 F.RLSESELE chr4@7519   | 1.70E-10 | 0.002925 |
| 11Nov2011 | 15978 | 719.39  | 28.86707 | 2 R.FTQAGSE Splice@chr   | 1.88E-13 | 0        |
| 11Nov2011 | 1077  | 503.26  | 2.921613 | 2 K.KNGGEM chr4@8235     | 1.16E-13 | 0        |
| 11Nov2011 | 12644 | 1345.63 | -24.7692 | 2 _._QVREMH Splice@chr   | 3.57E-10 | 0.007674 |
| 11Nov2011 | 2813  | 439.74  | 18.7116  | 2 R.SIAMFGP chr2@4157    | 1.96E-10 | 0.003648 |
| 11Nov2011 | 10483 | 999.52  | 13.3868  | 2 R.LVSERYG chr2@8997    | 2.21E-10 | 0.004276 |
| 11Nov2011 | 3024  | 615.8   | -16.0827 | 2 _._QLEISFDI Splice@chr | 2.73E-10 | 0.0055   |
| 11Nov2011 | 16388 | 623.03  | -18.2266 | 3 P.RNWGKG chrX@1446     | 3.20E-10 | 0.006813 |
| 11Nov2011 | 13803 | 974.46  | -7.21565 | 1 R.M+15.99 chr4@8791    | 7.48E-11 | 0.001579 |
| 11Nov2011 | 3644  | 1059.54 | -17.6437 | 1 _._YDHKNAI chr5@1738   | 2.76E-11 | 8.33E-04 |
| 11Nov2011 | 8697  | 1025.61 | -11.6755 | 1 K.LGLGSGL chr5@4945    | 7.22E-12 | 2.19E-04 |
| 11Nov2011 | 1146  | 710.36  | -9.42683 | 2 R.NFFDK+1 chr4@1075    | 4.24E-10 | 0.009282 |
| 11Nov2011 | 19761 | 1343.72 | -2.04547 | 1 _._LFM+15.5 Splice@chr | 4.36E-10 | 0.009615 |
| 11Nov2011 | 4282  | 833.46  | -4.25508 | 1 R.DMVQLV chrX@9811     | 2.88E-10 | 0.00575  |
| 11Nov2011 | 21271 | 1044.57 | 2.487942 | 2 R.SQLQTEV Splice@chr   | 4.57E-21 | 0        |
| 11Nov2011 | 17908 | 515.29  | -6.17134 | 3 K.PNFTVILS chr4@1642   | 4.32E-10 | 0.009445 |
| 11Nov2011 | 351   | 722.35  | 3.723    | 1 R.FQGGGEI chr1@2595    | 3.42E-10 | 0.007235 |
| 11Nov2011 | 4870  | 831.44  | -19.0561 | 1 K.WGGGGC chr3@1095     | 1.31E-10 | 0.0023   |
| 11Nov2011 | 11321 | 574.8   | 12.19222 | 2 R.WEVTSEI chr5@1925    | 2.90E-10 | 0.00575  |
| 11Nov2011 | 11497 | 565.83  | 14.11658 | 2 R.ISLTNANI chr5@7795   | 3.31E-10 | 0.00689  |
| 11Nov2011 | 4931  | 433.76  | 2.609238 | 2 _._IVDLP GPI chr3@1104 | 1.32E-10 | 0.0023   |
| 11Nov2011 | 12578 | 1345.63 | -24.7692 | 2 _._QVREMH Splice@chr   | 3.07E-10 | 0.006466 |
| 11Nov2011 | 19710 | 1343.72 | -2.04547 | 1 _._LFM+15.5 Splice@chr | 2.95E-10 | 0.00575  |
| 11Nov2011 | 8988  | 1161.65 | -28.0507 | 1 K.NSKDKLV chr5@1250    | 4.05E-10 | 0.008766 |
| 11Nov2011 | 21709 | 574.82  | -9.25392 | 2 K.TLNTTHL' Splice@chr  | 4.44E-10 | 0.009683 |
| 11Nov2011 | 23665 | 792.15  | -18.5783 | 4 K.SGTIFDNI Splice@chr  | 6.96E-18 | 0        |
| 11Nov2011 | 11943 | 781.41  | -6.726   | 2 K.ALEKEDIF chr1@1462   | 7.37E-16 | 0        |
| 11Nov2011 | 11947 | 521.28  | 1.17314  | 3 K.ALEKEDIF chr1@1462   | 1.91E-11 | 5.34E-04 |
| 11Nov2011 | 11355 | 1130.65 | 12.16972 | 1 R.ISLTNANI chr5@7795   | 4.54E-10 | 0.009763 |

|           |       |         |          |                          |          |          |
|-----------|-------|---------|----------|--------------------------|----------|----------|
| 11Nov2011 | 10012 | 829.38  | -15.1938 | 1 K.NDASFFK Splice@chr   | 3.66E-10 | 0.008195 |
| 11Nov2011 | 16337 | 622.7   | -11.061  | 3 P.RNWGKG chrX@1446     | 4.49E-10 | 0.009683 |
| 11Nov2011 | 5789  | 936.48  | 27.86052 | 1 K.LNGGYEC chr2@1191    | 1.31E-10 | 0.0023   |
| 11Nov2011 | 23690 | 968.14  | 28.52627 | 3 _GCSIVPIS Splice@chr   | 1.66E-10 | 0.002925 |
| 11Nov2011 | 20128 | 853.45  | -23.3178 | 2 K.NFKINSKI chr4@5819   | 3.25E-10 | 0.00689  |
| 11Nov2011 | 24238 | 963.14  | 21.93704 | 3 _CSIRPISG Splice@chr   | 1.49E-10 | 0.002566 |
| 11Nov2011 | 694   | 502.32  | 11.58019 | 2 K.ETKKRKG chr5@1026    | 4.13E-10 | 0.009024 |
| 11Nov2011 | 9158  | 559.79  | 11.35993 | 2 R.DGWSIGI chr4@4253    | 3.58E-10 | 0.007761 |
| 11Nov2011 | 13156 | 559.32  | 28.75221 | 2 R.IGMDLM chr3@1180     | 1.32E-11 | 3.28E-04 |
| 11Nov2011 | 11385 | 565.83  | 14.11658 | 2 R.ISLTNANI chr5@7793   | 4.07E-10 | 0.008766 |
| 11Nov2011 | 5609  | 741.38  | -23.1647 | 2 K.FPENRHI chr2@1477    | 4.34E-11 | 0.001312 |
| 11Nov2011 | 8843  | 559.79  | 11.35993 | 2 R.DGWSIGI chr4@4253    | 1.64E-10 | 0.002925 |
| 11Nov2011 | 21292 | 1044.07 | 4.096092 | 2 R.SQLQTEV Splice@chr   | 2.21E-20 | 0        |
| 11Nov2011 | 23765 | 1216.6  | -3.3897  | 2 L.RNTRNDI chr4@1012    | 4.55E-10 | 0.009763 |
| 11Nov2011 | 6408  | 1107.56 | -21.6943 | 1 _SSLDKESC chr5@1239    | 1.15E-11 | 2.19E-04 |
| 11Nov2011 | 3959  | 403.23  | 10.8661  | 2 R.AMVASG chr5@1721     | 1.22E-10 | 0.0023   |
| 11Nov2011 | 23290 | 957.84  | 7.76449  | 3 R.FIEPIEDIF Splice@chr | 3.31E-10 | 0.00689  |
| 11Nov2011 | 20922 | 895.5   | -12.868  | 2 K.M+15.99 chrX@1449    | 1.93E-12 | 0        |
| 11Nov2011 | 11403 | 1130.65 | 12.16972 | 1 R.ISLTNANI chr5@7793   | 3.94E-10 | 0.008611 |
| 11Nov2011 | 9331  | 566.31  | 21.45326 | 2 R.EVAQLEC chr5@1706    | 5.44E-11 | 0.00149  |
| 11Nov2011 | 4864  | 537.8   | -5.57144 | 2 K.DQGMLN chr5@2023     | 1.90E-10 | 0.003562 |
| 11Nov2011 | 24081 | 917.51  | 5.964791 | 2 _SIMSRLEI Splice@chr   | 4.12E-10 | 0.009024 |
| 11Nov2011 | 2980  | 615.8   | -16.0827 | 2 _QLEISFDI Splice@chr   | 3.66E-10 | 0.008195 |
| 11Nov2011 | 2953  | 710.86  | 21.23823 | 2 R.DSTQKW chr3@1337     | 1.82E-10 | 0.003192 |
| 11Nov2011 | 23672 | 792.16  | -5.99938 | 4 K.SGTIFDNI Splice@chr  | 6.30E-18 | 0        |
| 11Nov2011 | 1315  | 632.78  | -25.4076 | 2 _KM+15.9 Splice@chr    | 5.03E-11 | 0.001312 |
| 11Nov2011 | 22197 | 841.46  | 9.193507 | 2 _TRVASVG chr3@3743     | 9.42E-11 | 0.002043 |
| 11Nov2011 | 7177  | 454.75  | 8.810814 | 2 K.TDLAYLG chr4@1543    | 8.13E-11 | 0.001774 |
| 11Nov2011 | 20996 | 895     | -10.9918 | 2 K.M+15.99 chrX@1449    | 2.77E-10 | 0.005589 |
| 11Nov2011 | 4239  | 832.46  | -0.22022 | 1 R.DMVQLV chrX@9811     | 3.36E-10 | 0.00706  |
| 11Nov2011 | 5559  | 741.38  | -23.1647 | 2 K.FPENRHI chr2@1477    | 1.42E-10 | 0.00238  |
| 11Nov2011 | 20813 | 831.45  | -1.72693 | 2 R.NTRNQLI chrX@7297    | 3.56E-10 | 0.007674 |
| 11Nov2011 | 22254 | 1384.75 | 16.84983 | 1 K.FQNFAQI chr2@2226    | 1.25E-10 | 0.0023   |
| 11Nov2011 | 5785  | 471.79  | -5.7044  | 2 K.IKVNFPPI chr2@3034   | 1.03E-10 | 0.002137 |
| 11Nov2011 | 21664 | 574.82  | -9.25392 | 2 K.TLNTTHL Splice@chr   | 1.72E-10 | 0.003012 |
| 11Nov2011 | 2862  | 439.74  | 18.7116  | 2 R.SIAMFGP chr2@4157    | 1.12E-10 | 0.0023   |
| 11Nov2011 | 19249 | 1092.53 | 14.31508 | 3 K.LDEHFPL Splice@chr   | 2.99E-10 | 0.006201 |
| 11Nov2011 | 17239 | 682.88  | -29.0653 | 2 K.RIAQVSK chr4@1486    | 3.85E-10 | 0.008528 |
| 11Nov2011 | 2393  | 778.38  | -6.0874  | 2 K.IEKEM+1 Splice@chr   | 3.72E-10 | 0.008195 |
| 11Nov2011 | 549   | 703.38  | -2.78167 | 1 _DAAGLAC chr3@2528     | 5.21E-12 | 2.19E-04 |
| 11Nov2011 | 7897  | 493.78  | -11.3951 | 2 R.KNQENLI Splice@chr   | 2.16E-10 | 0.004276 |
| 11Nov2011 | 11459 | 1130.65 | 12.16972 | 1 R.ISLTNANI chr5@7793   | 4.43E-10 | 0.009683 |
| 11Nov2011 | 22770 | 1024.52 | -27.8903 | 2 F.K+14.016 chr4@8225   | 4.28E-10 | 0.009357 |
| 11Nov2011 | 6359  | 1107.56 | -21.6943 | 1 _SSLDKESC chr5@1239    | 4.25E-11 | 0.001312 |
| 11Nov2011 | 8785  | 559.79  | 11.35993 | 2 R.DGWSIGI chr4@4253    | 3.20E-10 | 0.006813 |
| 11Nov2011 | 16867 | 685.88  | 4.188613 | 2 K.IVPGGGA chrX@1570    | 1.81E-13 | 0        |
| 11Nov2011 | 10426 | 999.52  | 13.3868  | 2 R.LVSERYG chr2@8997    | 4.55E-10 | 0.009763 |

|           |       |         |          |                          |          |          |
|-----------|-------|---------|----------|--------------------------|----------|----------|
| 11Nov2011 | 22267 | 1385.75 | 14.42536 | 1 K.FQNFQAI chr2@2226    | 7.92E-11 | 0.001579 |
| 11Nov2011 | 11017 | 625.82  | -20.2839 | 2 R.K+14.016 chrX@1356   | 1.71E-10 | 0.003012 |
| 11Nov2011 | 1051  | 503.26  | 2.921613 | 2 K.KNGGEM chr4@8235     | 2.54E-10 | 0.005341 |
| 11Nov2011 | 10052 | 724.35  | 19.12636 | 3 V.CLTEEGK Splice@chr   | 8.62E-12 | 2.19E-04 |
| 11Nov2011 | 13634 | 749.39  | -17.0141 | 2 _._RLLQHAI Splice@chr  | 1.41E-11 | 4.33E-04 |
| 11Nov2011 | 3456  | 412.23  | 25.3069  | 2 R.IASYQGG chrX@1675    | 3.10E-11 | 8.33E-04 |
| 11Nov2011 | 744   | 502.32  | 11.58019 | 2 K.ETKKRKG chr5@1026    | 3.17E-10 | 0.006813 |
| 11Nov2011 | 10393 | 769.42  | -26.3223 | 1 _._NNAKPPK chr3@2451   | 4.24E-10 | 0.009282 |
| 11Nov2011 | 5462  | 1274.08 | 14.02996 | 2 L.EDESAAV Splice@chr   | 2.03E-10 | 0.004017 |
| 11Nov2011 | 21091 | 1216.59 | -11.6275 | 2 L.RNTRNDI chr4@1012    | 2.56E-10 | 0.005341 |
| 11Nov2011 | 5757  | 937.48  | 24.27422 | 1 K.LNGGYEC chr2@1191    | 1.20E-10 | 0.0023   |
| 11Nov2011 | 9384  | 566.31  | 21.45326 | 2 R.EVAQLEC chr5@1706    | 1.43E-10 | 0.00238  |
| 11Nov2011 | 11438 | 565.83  | 14.11658 | 2 R.ISLTNANI chr5@7795   | 3.23E-10 | 0.00689  |
| 11Nov2011 | 3243  | 710.86  | 21.23823 | 2 R.DSTQKW chr3@1337     | 3.44E-10 | 0.007235 |
| 11Nov2011 | 24329 | 1147.24 | 4.705638 | 3 R.FQSAAIG Splice@chr   | 1.79E-14 | 0        |
| 11Nov2011 | 5840  | 471.79  | -5.7044  | 2 K.IKVNFPPI chr2@3034   | 3.34E-10 | 0.00706  |
| 11Nov2011 | 17187 | 682.88  | -29.0653 | 2 K.RIAQVSK chr4@1486    | 2.72E-10 | 0.005413 |
| 11Nov2011 | 5654  | 1274.07 | 6.16406  | 2 L.EDESAAV Splice@chr   | 4.57E-11 | 0.001312 |
| 11Nov2011 | 8888  | 677.34  | -8.57314 | 2 K.MQQFSTI chr5@2080    | 3.18E-10 | 0.006813 |
| 11Nov2011 | 4339  | 833.46  | -4.25508 | 1 R.DMVQLV chrX@9811     | 3.09E-10 | 0.006466 |
| 11Nov2011 | 9044  | 1161.66 | -19.4191 | 1 K.NSKDKLV Splice@chr   | 2.93E-10 | 0.00575  |
| 11Nov2011 | 12338 | 467.93  | -25.8815 | 3 R.FLKISLESI chr5@3915  | 2.11E-10 | 0.004276 |
| 11Nov2011 | 3189  | 802.45  | -0.37858 | 1 R.IEAGGGC chr5@8776    | 1.89E-12 | 1.50E-04 |
| 11Nov2011 | 20668 | 858.14  | -0.47472 | 3 _._LETGIIPK Splice@chr | 5.38E-12 | 2.07E-04 |
| 11Nov2011 | 1035  | 722.35  | 3.723    | 1 R.FQGGGEI chr1@2595    | 3.38E-10 | 0.007423 |
| 11Nov2011 | 18989 | 719.38  | 14.92317 | 2 R.FTQAGSE Splice@chr   | 9.67E-13 | 1.50E-04 |
| 11Nov2011 | 32077 | 1147.25 | 13.44098 | 3 R.FQSAAIG Splice@chr   | 1.47E-12 | 1.50E-04 |
| 11Nov2011 | 28151 | 644.34  | 10.42113 | 5 K.MGTK+1+ chrX@5561    | 1.90E-10 | 0.00408  |
| 11Nov2011 | 22924 | 1110.04 | -27.8308 | 2 L.LHHHRVL Splice@chr   | 2.77E-11 | 9.75E-04 |
| 11Nov2011 | 18029 | 1288.7  | -18.58   | 2 K.TKKQKKK chrX@6244    | 1.31E-10 | 0.003247 |
| 11Nov2011 | 28877 | 914.49  | 1.202688 | 2 K.HRCHKNI chr2@1125    | 1.53E-11 | 4.69E-04 |
| 11Nov2011 | 5673  | 757.43  | -13.49   | 1 R.PLSAAAA chr5@3132    | 3.27E-10 | 0.007317 |
| 11Nov2011 | 4986  | 428.74  | -11.9149 | 4 _._FGFLASSI Splice@chr | 5.79E-11 | 0.002055 |
| 11Nov2011 | 3287  | 1065.51 | -21.5582 | 1 K.FNNSEKA Splice@chr   | 3.45E-10 | 0.007643 |
| 11Nov2011 | 6541  | 526.78  | -3.83085 | 2 K.KLDLNMI chr2@7182    | 2.35E-11 | 8.53E-04 |
| 11Nov2011 | 736   | 552.3   | 10.18569 | 2 R.TQNATAI Splice@chr   | 3.55E-11 | 0.001219 |
| 11Nov2011 | 10712 | 559.79  | 11.35993 | 2 R.DGWSIGI chr4@4255    | 1.26E-10 | 0.003195 |
| 11Nov2011 | 28933 | 957.5   | 1.956888 | 3 R.FIEPIEDIF Splice@chr | 2.69E-10 | 0.005987 |
| 11Nov2011 | 4900  | 856.48  | -26.3263 | 2 R.FLLRKEKSI chrX@1581  | 4.71E-10 | 0.009791 |
| 11Nov2011 | 6787  | 936.48  | 27.86052 | 1 K.LNGGYEC chr2@1191    | 2.15E-11 | 8.53E-04 |
| 11Nov2011 | 27620 | 1003.19 | 17.13413 | 3 R.CWNRRA Splice@chr    | 9.78E-11 | 0.002802 |
| 11Nov2011 | 27219 | 798.4   | -12.6137 | 4 K.SGDAGIV Splice@chr   | 5.09E-12 | 2.07E-04 |
| 11Nov2011 | 7545  | 1107.56 | -21.6943 | 1 _._SSLDKESI chr5@1235  | 3.18E-11 | 0.001158 |
| 11Nov2011 | 6633  | 741.38  | -23.1647 | 2 K.FPENRHII chr2@1477   | 3.95E-10 | 0.008965 |
| 11Nov2011 | 2393  | 444.25  | -3.23598 | 2 R.AELSSRPI chr3@8104   | 3.45E-10 | 0.007643 |
| 11Nov2011 | 5389  | 614.35  | -21.2611 | 2 K.YSSFVK+I chr5@1365   | 5.12E-12 | 2.07E-04 |
| 11Nov2011 | 18924 | 719.38  | 14.92317 | 2 R.FTQAGSE Splice@chr   | 6.09E-14 | 0        |

|           |       |         |          |                         |          |          |
|-----------|-------|---------|----------|-------------------------|----------|----------|
| 11Nov2011 | 32567 | 934.53  | -16.5464 | 3 K.AKRMKKI chr1@6827   | 4.43E-10 | 0.009536 |
| 11Nov2011 | 9286  | 831.48  | 13.44968 | 1 R.SSINAALF Splice@chr | 4.85E-10 | 0.009824 |
| 11Nov2011 | 10415 | 559.79  | 11.35993 | 2 R.DGWSIGI chr4@4255   | 5.88E-11 | 0.002055 |
| 11Nov2011 | 13406 | 565.83  | 14.11658 | 2 R.ISLTNANI chr5@7795  | 4.71E-10 | 0.009824 |
| 11Nov2011 | 18846 | 923.02  | 9.903217 | 2 R.TLNNLKV chr2@1060   | 2.19E-10 | 0.004463 |
| 11Nov2011 | 10765 | 559.79  | 11.35993 | 2 R.DGWSIGI chr4@4255   | 3.47E-10 | 0.007698 |
| 11Nov2011 | 3172  | 801.45  | 3.812604 | 1 R.IEAGGGG chr5@8776   | 1.86E-10 | 0.00408  |
| 11Nov2011 | 483   | 722.35  | 3.723    | 1 R.FQGGGEI chr1@2595   | 4.52E-10 | 0.0097   |
| 11Nov2011 | 13381 | 1130.64 | 3.300733 | 1 R.ISLTNANI chr5@7795  | 2.81E-10 | 0.006149 |
| 11Nov2011 | 9985  | 867.42  | 3.24052  | 1 K.SSSGSLSS chr2@1132  | 1.88E-10 | 0.00408  |
| 11Nov2011 | 32021 | 1147.25 | 13.44098 | 3 R.FQSAAIG Splice@chr  | 4.95E-15 | 0        |
| 11Nov2011 | 20721 | 858.47  | -5.67211 | 3 _LETGIKPI Splice@chr  | 5.90E-13 | 8.03E-05 |
| 11Nov2011 | 27187 | 1384.74 | 9.615872 | 1 K.FQNFAQI chr2@2226   | 4.68E-10 | 0.009791 |
| 11Nov2011 | 25122 | 831.45  | -1.72693 | 2 R.NTRNQLI chrX@7297   | 3.55E-10 | 0.007922 |
| 11Nov2011 | 3611  | 587.3   | 4.892896 | 2 Q.NAVEQE Splice@chr   | 1.18E-11 | 4.69E-04 |
| 11Nov2011 | 28759 | 1336.62 | -7.83933 | 2 K.DAGGNH chr4@7215    | 1.79E-11 | 5.97E-04 |
| 11Nov2011 | 21124 | 774.96  | 16.29715 | 2 E.DILFVINK Splice@chr | 1.65E-11 | 5.35E-04 |
| 11Nov2011 | 692   | 702.38  | 2.001521 | 1 _DAAGLAC chr3@2528    | 1.29E-11 | 4.69E-04 |
| 11Nov2011 | 7489  | 1107.56 | -21.6943 | 1 _SSLDKES chr5@1239    | 5.04E-11 | 0.001701 |
| 11Nov2011 | 5405  | 613.85  | -18.5241 | 2 K.YSSFVK+ chr5@1365   | 2.41E-11 | 9.75E-04 |
| 11Nov2011 | 9297  | 579.81  | -21.5115 | 2 _KIAESGSF chr4@1695   | 9.96E-11 | 0.002802 |
| 11Nov2011 | 25083 | 809.11  | 19.47063 | 3 _AKNATKY chr1@3095    | 2.99E-13 | 8.03E-05 |
| 11Nov2011 | 6888  | 471.79  | -5.7044  | 2 K.IKVNFPPI chr2@3034  | 2.14E-10 | 0.004409 |
| 11Nov2011 | 30320 | 954.46  | 24.98958 | 4 K.FAVADEE Splice@chr  | 1.87E-11 | 5.97E-04 |
| 11Nov2011 | 4919  | 428.74  | -11.9149 | 4 _FGFLASSI Splice@chr  | 2.17E-11 | 8.53E-04 |
| 11Nov2011 | 10989 | 566.31  | 21.45326 | 2 R.EVAQLEC chr5@1706   | 3.59E-11 | 0.001219 |
| 11Nov2011 | 27342 | 1384.74 | 9.615872 | 1 K.FQNFAQI chr2@2226   | 2.20E-10 | 0.004463 |
| 11Nov2011 | 27345 | 1385.75 | 14.42536 | 1 K.FQNFAQI chr2@2226   | 6.14E-11 | 0.002055 |
| 11Nov2011 | 9008  | 537.32  | -7.23135 | 2 _ILENQKIS chr2@4228   | 2.62E-10 | 0.005536 |
| 11Nov2011 | 9581  | 673.32  | -3.13278 | 2 R.QEM+15 chr3@1026    | 2.18E-10 | 0.004463 |
| 11Nov2011 | 14925 | 1346.12 | -11.1429 | 2 _QVREMH Splice@chr    | 3.72E-10 | 0.008474 |
| 11Nov2011 | 10824 | 559.79  | 11.35993 | 2 R.DGWSIGI chr4@4255   | 4.03E-10 | 0.009074 |
| 11Nov2011 | 6227  | 876.4   | -19.8707 | 1 K.TEDEARR chrX@1138   | 1.59E-10 | 0.00352  |
| 11Nov2011 | 9322  | 494.78  | 1.425137 | 2 R.KNEENLI chr1@9396   | 2.01E-10 | 0.004245 |
| 11Nov2011 | 21654 | 774.92  | -12.0333 | 2 K.LQIISVIFL chr4@8511 | 4.18E-10 | 0.009346 |
| 11Nov2011 | 29628 | 862.95  | 16.89984 | 2 K.HVLQNDI chr5@1781   | 1.12E-10 | 0.003037 |
| 11Nov2011 | 18164 | 1289.2  | -19.8826 | 2 K.TKKQKKK chrX@6244   | 1.51E-10 | 0.003409 |
| 11Nov2011 | 18865 | 719.38  | 14.92317 | 2 R.FTQAGSE Splice@chr  | 1.39E-13 | 0        |
| 11Nov2011 | 6078  | 685.37  | -27.0225 | 2 K.ISTQTHIC chr4@7638  | 3.45E-10 | 0.007643 |
| 11Nov2011 | 22494 | 849.92  | 6.583873 | 2 Q.DSSYFVE Splice@chr  | 5.75E-11 | 0.002055 |
| 11Nov2011 | 21287 | 1090.53 | -18.1295 | 2 K.INGVTVA chr3@6296   | 2.23E-10 | 0.004749 |
| 11Nov2011 | 26957 | 855.48  | -6.07153 | 2 K.IFTQTK+1 Splice@chr | 2.23E-10 | 0.004749 |
| 11Nov2011 | 29731 | 975.81  | -5.15613 | 3 K.SGTIFDNI Splice@chr | 4.27E-10 | 0.009503 |
| 11Nov2011 | 31678 | 850.45  | 9.125443 | 2 R.FSEVYRN Splice@chr  | 1.28E-10 | 0.003195 |
| 11Nov2011 | 6577  | 741.38  | -23.1647 | 2 K.FPENRHI chr2@1477   | 1.71E-10 | 0.003689 |
| 11Nov2011 | 8702  | 505.93  | 21.00865 | 3 K.DAGFDPI chr1@3577   | 2.85E-11 | 9.75E-04 |
| 11Nov2011 | 23359 | 760.71  | 5.279012 | 3 R.RAINGTE Splice@chr  | 3.33E-10 | 0.007423 |

|           |       |         |          |                         |          |          |
|-----------|-------|---------|----------|-------------------------|----------|----------|
| 11Nov2011 | 25405 | 732.07  | 19.51873 | 3 R.ATDDWII Splice@chr  | 2.26E-10 | 0.004749 |
| 11Nov2011 | 30518 | 1026.52 | 0.258688 | 3 R.NFFGYCC chr4@3457   | 4.61E-10 | 0.009791 |
| 11Nov2011 | 30236 | 968.47  | 23.9199  | 3 _GCSIVPIS Splice@chr  | 2.82E-12 | 2.07E-04 |
| 11Nov2011 | 11635 | 898.93  | 5.981728 | 2 R.NAEAAAI Splice@chr  | 4.17E-24 | 0        |
| 11Nov2011 | 25182 | 831.45  | -1.72693 | 2 R.NTRNQLF chrX@7297   | 1.70E-10 | 0.003689 |
| 11Nov2011 | 11222 | 1064.58 | -2.00842 | 1 K.YLINGNEI chr1@8687  | 6.08E-11 | 0.002055 |
| 11Nov2011 | 28249 | 1146.21 | -24.078  | 3 _ISMTNSN chrX@1761    | 3.73E-10 | 0.008527 |
| 11Nov2011 | 27082 | 890.44  | 14.86661 | 2 K.GWSVPLI Splice@chr  | 3.36E-11 | 0.001158 |
| 11Nov2011 | 32062 | 860.69  | 14.08015 | 4 R.FQSAAIG Splice@chr  | 2.29E-13 | 8.03E-05 |
| 11Nov2011 | 5704  | 756.43  | -9.04908 | 1 R.PLSAAAA chr5@3132   | 4.84E-10 | 0.009824 |
| 11Nov2011 | 5701  | 877.44  | -26.3234 | 1 R.IDDKTSAI chr5@8738  | 1.66E-10 | 0.003689 |
| 11Nov2011 | 13434 | 1130.64 | 3.300733 | 1 R.ISLTNANI chr5@7793  | 3.67E-10 | 0.00831  |
| 11Nov2011 | 22375 | 916.99  | -2.76563 | 2 R.LTGNISM chrX@3443   | 1.97E-10 | 0.004134 |
| 11Nov2011 | 6470  | 526.78  | -3.83085 | 2 K.KLDLNM chr2@7182    | 2.19E-11 | 8.53E-04 |
| 11Nov2011 | 347   | 819.41  | -6.64296 | 1 _KNEGASC chr1@1181    | 7.35E-11 | 0.002101 |
| 11Nov2011 | 22980 | 1110.04 | -27.8308 | 2 L.LHHHRVL Splice@chr  | 7.66E-12 | 2.07E-04 |
| 11Nov2011 | 21342 | 1090.53 | -18.1295 | 2 K.INGVTVA chr3@6296   | 2.51E-10 | 0.005369 |
| 11Nov2011 | 20817 | 1049.52 | 5.532542 | 3 G.DQSVDSI chr4@9163   | 3.31E-11 | 0.001158 |
| 11Nov2011 | 11107 | 1064.58 | -2.00842 | 1 K.YLINGNEI chr1@8687  | 1.55E-10 | 0.00352  |
| 11Nov2011 | 29071 | 876.98  | -22.6214 | 2 V.FPCK+14 chrX@2447   | 4.32E-10 | 0.009536 |
| 11Nov2011 | 18002 | 1289.2  | -19.8826 | 2 K.TKKQKKK chrX@6244   | 4.32E-10 | 0.009536 |
| 11Nov2011 | 24629 | 969.01  | -11.2595 | 2 Y.QRHVFNI Splice@chr  | 2.51E-10 | 0.005369 |
| 11Nov2011 | 31620 | 1042.56 | 7.300323 | 2 E.NFDIEM+ chr4@1789   | 2.16E-10 | 0.004409 |
| 11Nov2011 | 24109 | 1366.17 | -16.3461 | 2 K.TAQFTTT Splice@chr  | 5.67E-11 | 0.002004 |
| 11Nov2011 | 15890 | 943.57  | -2.9787  | 1 _SPLFVPKI chrX@4402   | 2.07E-10 | 0.004297 |
| 11Nov2011 | 11162 | 1064.58 | -2.00842 | 1 K.YLINGNEI chr1@8687  | 1.19E-10 | 0.003195 |
| 11Nov2011 | 5752  | 877.44  | -26.3234 | 1 R.IDDKTSAI chr5@8738  | 3.96E-10 | 0.008965 |
| 11Nov2011 | 21453 | 971.49  | 8.527395 | 2 R.RHHMFP chrX@1147    | 3.47E-10 | 0.007698 |
| 11Nov2011 | 5655  | 756.43  | -9.04908 | 1 R.PLSAAAA chr5@3132   | 3.11E-10 | 0.007048 |
| 11Nov2011 | 6766  | 937.48  | 24.27422 | 1 K.LNGGYEC chr2@1191   | 4.44E-11 | 0.00164  |
| 11Nov2011 | 697   | 703.38  | -2.78167 | 1 _DAAGLAC chr3@2528    | 5.21E-12 | 2.07E-04 |
| 11Nov2011 | 10361 | 559.79  | 11.35993 | 2 R.DGWSIGI chr4@4253   | 1.44E-10 | 0.003354 |
| 11Nov2011 | 279   | 848.41  | 2.093776 | 1 R.EEAELEK chr2@4805   | 2.34E-10 | 0.005095 |
| 11Nov2011 | 25518 | 1216.58 | -19.8654 | 2 L.RNTRNDI chr4@1012   | 1.30E-10 | 0.003195 |
| 11Nov2011 | 21217 | 990.49  | -21.8765 | 2 F.RLSESELE chr4@7519  | 1.26E-10 | 0.003195 |
| 11Nov2011 | 5764  | 756.43  | -9.04908 | 1 R.PLSAAAA chr5@3132   | 4.65E-10 | 0.009791 |
| 11Nov2011 | 11505 | 607.34  | -12.541  | 2 K.ESEPITPII chr1@2075 | 2.64E-11 | 9.75E-04 |
| 11Nov2011 | 10572 | 739.4   | 18.15789 | 2 K.M+15.99 chr5@5476   | 1.93E-10 | 0.004134 |
| 11Nov2011 | 30203 | 968.13  | 18.26018 | 3 _GCSIVPIS Splice@chr  | 1.11E-10 | 0.003037 |
| 11Nov2011 | 7406  | 831.49  | -4.77706 | 1 _SIVGNLTI Splice@chr  | 1.66E-10 | 0.003689 |
| 11Nov2011 | 470   | 1000.59 | 27.93569 | 1 R.KNKEQQI Splice@chr  | 4.51E-10 | 0.008707 |
| 11Nov2011 | 13301 | 565.83  | 14.11658 | 2 R.ISLTNANI chr5@7793  | 2.86E-10 | 0.005279 |
| 11Nov2011 | 13303 | 1130.65 | 12.16972 | 1 R.ISLTNANI chr5@7793  | 2.55E-10 | 0.00451  |
| 11Nov2011 | 11188 | 1063.58 | 1.14882  | 1 K.YLINGNEI chr1@8687  | 2.02E-10 | 0.003625 |
| 11Nov2011 | 21112 | 971.49  | 8.527395 | 2 R.RHHMFP chrX@1147    | 5.09E-12 | 2.15E-04 |
| 11Nov2011 | 205   | 848.41  | 2.093776 | 1 R.EEAELEK chr2@4805   | 2.25E-10 | 0.004035 |
| 11Nov2011 | 17481 | 1090.65 | 11.49554 | 1 L.SLIILAM+ Splice@chr | 3.80E-10 | 0.007749 |

|           |       |         |          |                          |          |          |
|-----------|-------|---------|----------|--------------------------|----------|----------|
| 11Nov2011 | 30654 | 860.69  | 14.08015 | 4 R.FQSAAIG Splice@chr   | 7.26E-12 | 2.15E-04 |
| 11Nov2011 | 585   | 702.38  | 2.001521 | 1 _..DAAGLAC chr3@2528   | 1.29E-11 | 2.15E-04 |
| 11Nov2011 | 10908 | 559.79  | 11.35993 | 2 R.DGWSIG chr4@4253     | 1.43E-10 | 0.002546 |
| 11Nov2011 | 28141 | 957.5   | 1.956888 | 3 R.FIEPIEDIF Splice@chr | 1.63E-10 | 0.002719 |
| 11Nov2011 | 5834  | 439.23  | -12.3957 | 2 R.IDDKTSAI chr5@8738   | 8.87E-11 | 0.001951 |
| 11Nov2011 | 23776 | 910.99  | -12.6489 | 2 Y.FKNIDKD Splice@chr   | 2.63E-10 | 0.004623 |
| 11Nov2011 | 11058 | 566.31  | 21.45326 | 2 R.EVAQLEC chr5@1706    | 5.23E-11 | 0.001002 |
| 11Nov2011 | 17928 | 1289.2  | -19.8826 | 2 K.TKKQKKK chrX@6244    | 1.36E-10 | 0.002426 |
| 11Nov2011 | 13354 | 565.83  | 14.11658 | 2 R.ISLTNANI chr5@7793   | 4.34E-10 | 0.00842  |
| 11Nov2011 | 13530 | 499.28  | 5.144758 | 2 _..VYNIYVAI chrX@1610  | 2.26E-10 | 0.004035 |
| 11Nov2011 | 30377 | 963.14  | 25.74479 | 3 _..GCSIVPIS Splice@chr | 3.58E-11 | 7.49E-04 |
| 11Nov2011 | 3823  | 587.3   | 4.892896 | 2 Q.NAVEQE Splice@chr    | 1.69E-11 | 3.53E-04 |
| 11Nov2011 | 17388 | 717.89  | 18.98652 | 2 R.LNIAMN Splice@chr    | 3.79E-10 | 0.00763  |
| 11Nov2011 | 5807  | 877.45  | -14.9027 | 1 R.IDDKTSAI chr5@8738   | 2.58E-10 | 0.004568 |
| 11Nov2011 | 20304 | 858.48  | 6.006088 | 3 _..LETGIKPI Splice@chr | 1.18E-14 | 0        |
| 11Nov2011 | 17777 | 1289.2  | -19.8826 | 2 K.TKKQKKK chrX@6244    | 3.88E-10 | 0.007856 |
| 11Nov2011 | 22057 | 849.93  | 18.38221 | 2 Q.DSSYFVE Splice@chr   | 1.61E-11 | 3.53E-04 |
| 11Nov2011 | 8393  | 556.3   | 8.418136 | 2 R.AEADILEI chr1@1288   | 3.27E-10 | 0.005965 |
| 11Nov2011 | 18687 | 719.39  | 28.86707 | 2 R.FTQAGSE Splice@chr   | 8.67E-14 | 0        |
| 11Nov2011 | 20926 | 1090.53 | -18.1295 | 2 K.INGVTVA chr3@6296    | 1.93E-10 | 0.003387 |
| 11Nov2011 | 26564 | 1385.74 | 7.1914   | 1 K.FQNFQAI chr2@2226    | 3.66E-11 | 7.49E-04 |
| 11Nov2011 | 29822 | 1000.51 | -15.4866 | 2 E.CLVVNL Splice@chr    | 8.80E-11 | 0.001951 |
| 11Nov2011 | 29611 | 959.52  | -27.8897 | 2 K.KSNFFRFI chr3@1331   | 4.83E-10 | 0.009512 |
| 11Nov2011 | 20749 | 990.5   | -11.7554 | 2 F.RLSESELE chr4@7519   | 3.82E-11 | 8.83E-04 |
| 11Nov2011 | 11247 | 1063.58 | 1.14882  | 1 K.YLINGNEI chr1@8687   | 1.16E-10 | 0.002249 |
| 11Nov2011 | 3383  | 418.71  | -3.8722  | 2 R.WITSSDK chr1@4395    | 4.21E-10 | 0.008193 |
| 11Nov2011 | 30112 | 963.13  | 11.61408 | 3 _..CSIRPISG Splice@chr | 2.59E-10 | 0.004568 |
| 11Nov2011 | 26440 | 890.44  | 14.86661 | 2 K.GWSVPLI Splice@chr   | 1.88E-10 | 0.003267 |
| 11Nov2011 | 10504 | 559.79  | 11.35993 | 2 R.DGWSIG chr4@4253     | 1.18E-10 | 0.002249 |
| 11Nov2011 | 5789  | 439.23  | -12.3957 | 2 R.IDDKTSAI chr5@8738   | 5.37E-11 | 0.001002 |
| 11Nov2011 | 10706 | 739.4   | 18.15789 | 2 K.M+15.99 chr5@5476    | 4.87E-10 | 0.009512 |
| 11Nov2011 | 21237 | 774.92  | -12.0333 | 2 K.LQIISVIF chr4@8511   | 2.67E-10 | 0.004861 |
| 11Nov2011 | 31079 | 798.4   | 12.60083 | 2 K.VHLVYFN chr5@7770    | 1.35E-11 | 2.15E-04 |
| 11Nov2011 | 29216 | 968.14  | 28.52627 | 3 _..GCSIVPIS Splice@chr | 2.01E-10 | 0.003625 |
| 11Nov2011 | 30628 | 860.69  | 14.08015 | 4 R.FQSAAIG Splice@chr   | 4.73E-10 | 0.009401 |
| 11Nov2011 | 6874  | 936.48  | 27.86052 | 1 K.LNGGYEC chr2@1191    | 9.67E-11 | 0.002006 |
| 11Nov2011 | 18625 | 719.39  | 28.86707 | 2 R.FTQAGSE Splice@chr   | 1.14E-13 | 0        |
| 11Nov2011 | 6903  | 937.48  | 24.27422 | 1 K.LNGGYEC chr2@1191    | 4.48E-11 | 9.41E-04 |
| 11Nov2011 | 11656 | 898.93  | 5.981728 | 2 R.NAEAAAI Splice@chr   | 1.12E-22 | 0        |
| 11Nov2011 | 16838 | 671.37  | -24.0361 | 2 T.FNIVHTQ Splice@chr   | 3.35E-10 | 0.006025 |
| 11Nov2011 | 22511 | 1110.04 | -27.8308 | 2 L.LHHHRVL Splice@chr   | 2.69E-11 | 4.83E-04 |
| 11Nov2011 | 19787 | 685.88  | 4.188613 | 2 K.IVPGGGA chrX@1570    | 1.59E-15 | 0        |
| 11Nov2011 | 10778 | 1089.65 | -29.1532 | 1 K.KLKSMKN chr5@3701    | 8.12E-11 | 0.001635 |
| 11Nov2011 | 11144 | 1064.58 | -2.00842 | 1 K.YLINGNEI chr1@8687   | 4.64E-11 | 9.41E-04 |
| 11Nov2011 | 6987  | 936.48  | 27.86052 | 1 K.LNGGYEC chr2@1191    | 4.12E-11 | 9.41E-04 |
| 11Nov2011 | 22597 | 1092.53 | 14.31508 | 3 K.LDEHFPL Splice@chr   | 5.04E-10 | 0.009847 |
| 11Nov2011 | 5852  | 537.79  | -24.2187 | 2 K.DQGMLN chr5@2023     | 1.55E-10 | 0.002719 |

|           |       |         |          |                         |          |          |
|-----------|-------|---------|----------|-------------------------|----------|----------|
| 11Nov2011 | 30618 | 1147.25 | 13.44098 | 3 R.FQSAAIG Splice@chr  | 6.71E-14 | 0        |
| 11Nov2011 | 26669 | 1385.75 | 14.42536 | 1 K.FQNFAQI chr2@2226   | 2.24E-10 | 0.004035 |
| 11Nov2011 | 11418 | 624.33  | 9.752617 | 2 R.QHAYAVI chrX@1402   | 1.38E-10 | 0.002484 |
| 11Nov2011 | 10455 | 559.79  | 11.35993 | 2 R.DGWSIGI chr4@4253   | 1.71E-10 | 0.002778 |
| 11Nov2011 | 32184 | 506.57  | 1.126789 | 3 _DWHHTF Splice@chr    | 3.52E-11 | 7.49E-04 |
| 11Nov2011 | 4203  | 948.51  | 28.50553 | 1 R.DLTNDITI Splice@chr | 4.89E-10 | 0.009687 |
| 11Nov2011 | 11601 | 898.93  | 5.981728 | 2 R.NAEAAAI Splice@chr  | 1.48E-24 | 0        |
| 11Nov2011 | 22007 | 849.93  | 18.38221 | 2 Q.DSSYFVE Splice@chr  | 2.32E-10 | 0.004153 |
| 11Nov2011 | 20122 | 664.7   | 1.197202 | 3 _PTLNK+1 chr1@6526    | 6.51E-11 | 0.001125 |
| 11Nov2011 | 18570 | 719.39  | 28.86707 | 2 R.FTQAGSE Splice@chr  | 1.71E-13 | 0        |
| 11Nov2011 | 631   | 552.3   | 10.18569 | 2 R.TQNATAI Splice@chr  | 6.03E-11 | 0.001125 |
| 11Nov2011 | 8852  | 505.93  | 21.00865 | 3 K.DAGFDPI chr1@3577   | 2.78E-10 | 0.005036 |
| 11Nov2011 | 10551 | 677.34  | -8.57314 | 2 K.MQQFSTI chr5@2080   | 1.91E-10 | 0.003387 |
| 11Nov2011 | 464   | 890.47  | 3.986903 | 1 R.SSTLQPEI chr3@3247  | 4.05E-10 | 0.007971 |
| 11Nov2011 | 22561 | 1110.04 | -27.8308 | 2 L.LHHHRVL Splice@chr  | 1.37E-11 | 2.15E-04 |
| 11Nov2011 | 26056 | 849.41  | -3.23735 | 2 Q.DSSYFVE Splice@chr  | 2.79E-10 | 0.005036 |
| 11Nov2011 | 11197 | 1064.58 | -2.00842 | 1 K.YLINGNEI chr1@8687  | 1.49E-10 | 0.002665 |
| 11Nov2011 | 15939 | 749.39  | -17.0141 | 2 _RLLQHAI Splice@chr   | 1.77E-11 | 3.53E-04 |
| 11Nov2011 | 32132 | 506.57  | 1.126789 | 3 _DWHHTF Splice@chr    | 1.89E-11 | 3.53E-04 |
| 11Nov2011 | 7681  | 1107.57 | -12.7508 | 1 _SSLDKESC chr5@1239   | 3.73E-11 | 7.49E-04 |
| 11Nov2011 | 6241  | 734.93  | -18.5146 | 2 R.RKAVREC Splice@chr  | 3.03E-10 | 0.005503 |
| 11Nov2011 | 14735 | 1345.63 | -24.7692 | 2 _QVREMH Splice@chr    | 4.33E-10 | 0.00842  |
| 11Nov2011 | 26586 | 798.4   | -12.6137 | 4 K.SGDAGIV Splice@chr  | 1.32E-10 | 0.002426 |
| 11Nov2011 | 25865 | 889.95  | -19.8868 | 2 K.RSSVHTE chr2@8442   | 2.34E-10 | 0.004153 |
| 11Nov2011 | 20740 | 774.96  | 16.29715 | 2 E.DILFVINK Splice@chr | 5.38E-11 | 0.001002 |
| 11Nov2011 | 11257 | 1064.58 | -2.00842 | 1 K.YLINGNEI chr1@8687  | 1.04E-10 | 0.002068 |
| 11Nov2011 | 23821 | 1169.62 | 22.07753 | 2 _QAFWKR Splice@chr    | 2.65E-10 | 0.004683 |
| 11Nov2011 | 6133  | 685.38  | -12.3964 | 2 K.ISTQTHIC chr4@7638  | 4.51E-10 | 0.008707 |
| 11Nov2011 | 10795 | 559.79  | 11.35993 | 2 R.DGWSIGI chr4@4253   | 3.72E-10 | 0.007213 |
| 11Nov2011 | 10423 | 752.88  | -14.2545 | 2 R.GKCNGG chr4@5126    | 1.89E-10 | 0.003387 |
| 11Nov2011 | 6714  | 741.38  | -23.1647 | 2 K.FPENRHI chr2@1477   | 2.40E-10 | 0.004451 |
| 11Nov2011 | 17535 | 1090.65 | 11.49554 | 1 L.SLIILAM+ Splice@chr | 4.45E-10 | 0.008653 |
| 11Nov2011 | 589   | 703.38  | -2.78167 | 1 _DAAGLAC chr3@2528    | 5.12E-12 | 2.15E-04 |
| 11Nov2011 | 19732 | 685.88  | 4.188613 | 2 K.IVPGGGA chrX@1570   | 9.06E-19 | 0        |
| 11Nov2011 | 21184 | 774.92  | -12.0333 | 2 K.LQIISVIFI chr4@8511 | 2.89E-10 | 0.005384 |
| 11Nov2011 | 6925  | 936.48  | 27.86052 | 1 K.LNGGYEC chr2@1191   | 4.93E-11 | 0.001002 |
| 11Nov2011 | 29766 | 911.42  | 20.49399 | 2 _PRM+15. Splice@chr   | 2.68E-10 | 0.004861 |
| 11Nov2011 | 17226 | 1111.11 | -2.0893  | 2 R.LLM+15.5 chr4@3284  | 2.19E-10 | 0.003921 |
| 11Nov2011 | 13246 | 565.83  | 14.11658 | 2 R.ISLTNANI chr5@7793  | 4.30E-10 | 0.008245 |
| 11Nov2011 | 32165 | 506.57  | 1.126789 | 3 _DWHHTF Splice@chr    | 1.15E-10 | 0.002249 |
| 11Nov2011 | 29948 | 1376.99 | 19.51769 | 3 P.PM+15.9 Splice@chr  | 2.34E-10 | 0.004153 |
| 11Nov2011 | 26614 | 1384.74 | 9.615872 | 1 K.FQNFAQI chr2@2226   | 3.68E-10 | 0.007095 |
| 11Nov2011 | 5893  | 439.23  | -12.3957 | 2 R.IDDKTSAI chr5@8738  | 3.30E-10 | 0.005965 |
| 11Nov2011 | 17869 | 1289.2  | -19.8826 | 2 K.TKKQKKK chrX@6244   | 2.78E-10 | 0.005036 |
| 11Nov2011 | 24940 | 1216.59 | -11.6275 | 2 L.RNTRNDI chr4@1012   | 3.22E-10 | 0.005794 |
| 11Nov2011 | 7649  | 1106.56 | -18.6599 | 1 _SSLDKESC chr5@1239   | 4.30E-10 | 0.008304 |
| 11Nov2011 | 10397 | 1025.61 | -11.6755 | 1 K.LGLGSGL chr5@4945   | 5.70E-12 | 2.15E-04 |

|           |       |         |          |                          |          |          |
|-----------|-------|---------|----------|--------------------------|----------|----------|
| 11Nov2011 | 14850 | 1345.63 | -24.7692 | 2 _._QVREMH Splice@chr   | 4.07E-10 | 0.007971 |
| 11Nov2011 | 30504 | 1122.58 | -14.3665 | 1 R.GARWYV chr5@1321     | 9.24E-11 | 0.001951 |
| 11Nov2011 | 29520 | 1015.5  | -19.4324 | 2 R.FMNSSK+ chr2@8237    | 3.82E-10 | 0.007806 |
| 11Nov2011 | 30384 | 975.45  | -17.6893 | 3 K.AVPFVPI\$ Splice@chr | 3.36E-10 | 0.006145 |
| 11Nov2011 | 7623  | 1107.57 | -12.7508 | 1 _._SSLDKES( chr5@1239  | 4.58E-11 | 9.41E-04 |
| 11Nov2011 | 249   | 819.42  | 5.602837 | 1 _._KNEGAS( chr1@1181   | 6.35E-11 | 0.001125 |
| 11Nov2011 | 11910 | 975.55  | -13.0268 | 1 K.LPKLDAYI chr4@1149   | 2.11E-10 | 0.003737 |
| 11Nov2011 | 5548  | 613.85  | -18.5241 | 2 K.YSSFVK+; chr5@1363   | 2.16E-11 | 4.83E-04 |
| 11Nov2011 | 21592 | 1034.57 | -2.45085 | 2 K.FK+14.01 Splice@chr  | 2.68E-12 | 2.15E-04 |
| 11Nov2011 | 17681 | 1289.2  | -19.8826 | 2 K.TKKQKKK chrX@6244    | 7.92E-11 | 0.002025 |
| 11Nov2011 | 17960 | 894.41  | 13.57006 | 2 _._FSDDDVT Splice@chr  | 7.44E-11 | 0.001901 |
| 11Nov2011 | 24761 | 831.45  | -1.72693 | 2 R.NTRNQLF chrX@7297    | 2.21E-10 | 0.004884 |
| 11Nov2011 | 23755 | 1366.17 | -16.3461 | 2 K.TAQFTTT Splice@chr   | 1.56E-10 | 0.003657 |
| 11Nov2011 | 30673 | 1377.32 | 16.33919 | 3 P.PM+15.9 Splice@chr   | 3.17E-10 | 0.00643  |
| 11Nov2011 | 10354 | 1089.65 | -29.1532 | 1 K.KLKSMKN chr5@3701    | 2.59E-10 | 0.005455 |
| 11Nov2011 | 6423  | 741.38  | -23.1647 | 2 K.FPENRHI, chr2@1477   | 1.67E-10 | 0.003833 |
| 11Nov2011 | 8802  | 434.24  | 13.9946  | 3 _._RSNDQTI chr5@6378   | 3.73E-10 | 0.007885 |
| 11Nov2011 | 17513 | 924.41  | -11.8314 | 2 Q.KPDDISN Splice@chr   | 2.56E-10 | 0.00534  |
| 11Nov2011 | 5700  | 433.76  | 2.609238 | 2 _._IVDLP GPI chr3@1104 | 1.08E-10 | 0.002706 |
| 11Nov2011 | 32383 | 770.14  | -7.12376 | 4 _._MSLIREK- chr3@1233  | 3.32E-10 | 0.006715 |
| 11Nov2011 | 17995 | 766.36  | -1.8739  | 2 K.SDGV DV\$ gi 3928951 | 9.41E-12 | 1.45E-04 |
| 11Nov2011 | 24713 | 521.3   | 24.95499 | 2 R.NLNEVEII chr4@1305   | 2.47E-10 | 0.005291 |
| 11Nov2011 | 26150 | 665.37  | -26.6417 | 2 Q.INNK+14 Splice@chr   | 4.17E-10 | 0.008847 |
| 11Nov2011 | 710   | 556.31  | 12.70857 | 2 K.KNAEFFLI chr1@9699   | 4.59E-10 | 0.009406 |
| 11Nov2011 | 12532 | 765.38  | -12.3766 | 1 R.SPEHAPK chr5@4294    | 3.24E-10 | 0.006715 |
| 11Nov2011 | 13010 | 565.83  | 14.11658 | 2 R.ISLTNANI chr5@7793   | 4.46E-10 | 0.009293 |
| 11Nov2011 | 26293 | 1133.59 | -6.23448 | 3 K.HQLVSAF Splice@chr   | 2.91E-14 | 0        |
| 11Nov2011 | 18782 | 887.93  | 29.43791 | 2 I.DEREESTM Splice@chr  | 1.03E-10 | 0.002706 |
| 11Nov2011 | 5596  | 831.44  | -19.0561 | 1 K.WGGGG( chr3@1095     | 2.12E-10 | 0.004653 |
| 11Nov2011 | 31381 | 963.13  | 11.61408 | 3 _._CSIRPISG Splice@chr | 2.16E-12 | 0        |
| 11Nov2011 | 22017 | 849.92  | 6.583873 | 2 Q.DSSYFVE Splice@chr   | 9.69E-11 | 0.002588 |
| 11Nov2011 | 27044 | 798.4   | -12.6137 | 4 K.SGDAGIV Splice@chr   | 2.37E-11 | 7.66E-04 |
| 11Nov2011 | 17780 | 1289.2  | -19.8826 | 2 K.TKKQKKK chrX@6244    | 3.89E-10 | 0.008288 |
| 11Nov2011 | 11418 | 975.55  | -13.0268 | 1 K.LPKLDAYI chr4@1149   | 9.14E-11 | 0.002402 |
| 11Nov2011 | 26919 | 1385.74 | 7.1914   | 1 K.FQNFQAI chr2@2226    | 2.20E-11 | 6.29E-04 |
| 11Nov2011 | 747   | 552.3   | 10.18569 | 2 R.TQNATAI Splice@chr   | 6.68E-11 | 0.001712 |
| 11Nov2011 | 27459 | 1003.18 | 7.145987 | 3 R.CWNRRA Splice@chr    | 1.69E-11 | 2.83E-04 |
| 11Nov2011 | 6615  | 1075.59 | -26.5812 | 1 R.M+15.99 chr5@1902    | 3.38E-10 | 0.006829 |
| 11Nov2011 | 10028 | 752.88  | -14.2545 | 2 R.GKCNGG. chr4@5126    | 4.80E-10 | 0.009738 |
| 11Nov2011 | 28737 | 957.5   | 1.956888 | 3 R.FIEPIEDIF Splice@chr | 1.54E-10 | 0.003605 |
| 11Nov2011 | 19291 | 924.41  | -11.8314 | 2 Q.KPDDISN Splice@chr   | 4.58E-10 | 0.009406 |
| 11Nov2011 | 448   | 1000.59 | 27.93569 | 1 R.KNKEQQI Splice@chr   | 4.42E-10 | 0.009243 |
| 11Nov2011 | 10880 | 1063.58 | 1.14882  | 1 K.YLINGNEI chr1@8687   | 5.11E-11 | 0.00147  |
| 11Nov2011 | 27026 | 1384.74 | 9.615872 | 1 K.FQNFQAI chr2@2226    | 4.44E-10 | 0.009243 |
| 11Nov2011 | 11128 | 1086.02 | 18.22629 | 2 V.CLTEEGK Splice@chr   | 1.28E-12 | 0        |
| 11Nov2011 | 14208 | 1173.17 | -9.30319 | 3 K.PTMRTCC Splice@chr   | 4.15E-11 | 0.001144 |
| 11Nov2011 | 14075 | 1173.17 | -9.30319 | 3 K.PTMRTCC Splice@chr   | 9.44E-12 | 1.45E-04 |

|           |       |         |          |                          |          |          |
|-----------|-------|---------|----------|--------------------------|----------|----------|
| 11Nov2011 | 10794 | 622.65  | 20.40203 | 3 K.QIEQGEA Splice@chr   | 2.64E-10 | 0.005506 |
| 11Nov2011 | 19647 | 685.88  | 4.188613 | 2 K.IVPGGGA chrX@1570    | 6.55E-15 | 0        |
| 11Nov2011 | 20826 | 774.96  | 16.29715 | 2 E.DILFVINK Splice@chr  | 3.18E-11 | 9.57E-04 |
| 11Nov2011 | 562   | 702.38  | 2.001521 | 1 _DAAGLAC chr3@2528     | 1.29E-11 | 2.14E-04 |
| 11Nov2011 | 27105 | 1384.75 | 16.84983 | 1 K.FQNFQAI chr2@2226    | 4.93E-10 | 0.00984  |
| 11Nov2011 | 29732 | 692.88  | -15.9671 | 2 A.SRLFIFVN Splice@chr  | 2.17E-10 | 0.004772 |
| 11Nov2011 | 11578 | 724.35  | 19.12636 | 3 V.CLTEEGK Splice@chr   | 3.63E-12 | 0        |
| 11Nov2011 | 6056  | 1274.07 | 6.16406  | 2 L.EDESAAV Splice@chr   | 1.63E-10 | 0.003833 |
| 11Nov2011 | 18476 | 923.02  | 9.903217 | 2 R.TLNNLKV chr2@1060    | 4.43E-10 | 0.009243 |
| 11Nov2011 | 26786 | 1003.18 | 7.145987 | 3 R.CWNRRA Splice@chr    | 3.04E-11 | 9.57E-04 |
| 11Nov2011 | 10834 | 1064.58 | -2.00842 | 1 K.YLINGNEI chr1@8687   | 6.31E-11 | 0.001712 |
| 11Nov2011 | 10313 | 739.4   | 18.15789 | 2 K.M+15.99 chr5@5476    | 3.37E-10 | 0.006771 |
| 11Nov2011 | 28784 | 957.5   | 1.956888 | 3 R.FIEPIEDIF Splice@chr | 5.87E-11 | 0.00159  |
| 11Nov2011 | 28871 | 876.98  | -22.6214 | 2 V.FPCK+14. chrX@2447   | 4.54E-10 | 0.009293 |
| 11Nov2011 | 9377  | 673.32  | -3.13278 | 2 R.QEM+15. chr3@1026    | 1.44E-10 | 0.003362 |
| 11Nov2011 | 15047 | 1075.05 | -16.1169 | 2 R.TCSK+14. chr2@1255   | 1.14E-10 | 0.002891 |
| 11Nov2011 | 26904 | 890.44  | 14.86661 | 2 K.GWSVPLI Splice@chr   | 3.65E-11 | 0.001086 |
| 11Nov2011 | 20416 | 1058.98 | -15.5538 | 2 F.QKFYSFQ chr2@4922    | 1.56E-10 | 0.003657 |
| 11Nov2011 | 15568 | 662.86  | 7.984656 | 2 S.INM+15.5 chr4@2551   | 4.81E-10 | 0.009738 |
| 11Nov2011 | 10941 | 1063.58 | 1.14882  | 1 K.YLINGNEI chr1@8687   | 2.06E-10 | 0.004536 |
| 11Nov2011 | 7354  | 463.77  | 1.18704  | 2 K.PVNIENLI chrX@1210   | 1.24E-10 | 0.003127 |
| 11Nov2011 | 17100 | 1111.11 | -2.0893  | 2 R.LLM+15.5 chr4@3284   | 2.67E-10 | 0.005506 |
| 11Nov2011 | 2814  | 888.52  | 29.02223 | 1 R.YNLHTLK Splice@chr   | 4.87E-10 | 0.009792 |
| 11Nov2011 | 11526 | 724.35  | 19.12636 | 3 V.CLTEEGK Splice@chr   | 6.07E-12 | 7.33E-05 |
| 11Nov2011 | 19709 | 685.88  | 4.188613 | 2 K.IVPGGGA chrX@1570    | 1.87E-12 | 0        |
| 11Nov2011 | 20701 | 833.92  | -21.2254 | 2 _IIEPYVAV Splice@chr   | 1.30E-11 | 2.14E-04 |
| 11Nov2011 | 3204  | 1065.51 | -21.5582 | 1 K.FNNSEKA Splice@chr   | 2.39E-10 | 0.005177 |
| 11Nov2011 | 7165  | 519.6   | -26.5197 | 3 K.IGSM+15 chr5@1654    | 6.49E-11 | 0.001712 |
| 11Nov2011 | 22273 | 1056.56 | 28.0642  | 3 I.SRVEDDSI Splice@chr  | 6.93E-15 | 0        |
| 11Nov2011 | 16610 | 1106.58 | 8.124787 | 1 K.NLVCKQE chr5@1606    | 2.02E-10 | 0.004479 |
| 11Nov2011 | 10773 | 1063.58 | 1.14882  | 1 K.YLINGNEI chr1@8687   | 4.42E-10 | 0.009186 |
| 11Nov2011 | 28451 | 1135.56 | 14.02138 | 2 _DMDYAFI Splice@chr    | 2.89E-10 | 0.005914 |
| 11Nov2011 | 18133 | 894.41  | 13.57006 | 2 _FDSDDVT Splice@chr    | 2.66E-12 | 0        |
| 11Nov2011 | 30173 | 954.46  | 24.98958 | 4 K.FAVADEE Splice@chr   | 1.44E-10 | 0.003362 |
| 11Nov2011 | 932   | 403.23  | 10.8661  | 2 R.AMVASG chr5@1721     | 7.91E-12 | 7.33E-05 |
| 11Nov2011 | 11591 | 975.55  | -13.0268 | 1 K.LPKLDAYI chr4@1149   | 3.89E-11 | 0.001144 |
| 11Nov2011 | 1385  | 710.36  | -9.42683 | 2 R.NFFDK+1 chr4@1075    | 3.59E-10 | 0.007532 |
| 11Nov2011 | 7567  | 546.78  | -19.0827 | 2 K.ETETGITC chr4@1221   | 2.96E-11 | 8.94E-04 |
| 11Nov2011 | 660   | 552.8   | 7.143001 | 2 R.TQNATAI Splice@chr   | 3.96E-10 | 0.008516 |
| 11Nov2011 | 664   | 552.3   | 10.18569 | 2 R.TQNATAI Splice@chr   | 8.72E-11 | 0.002212 |
| 11Nov2011 | 29416 | 975.81  | -5.15613 | 3 K.SGTIFDNI Splice@chr  | 2.89E-12 | 0        |
| 11Nov2011 | 5454  | 971.56  | 2.079638 | 1 R.NGQLNRI chr4@6924    | 3.99E-10 | 0.008516 |
| 11Nov2011 | 14874 | 1173.49 | -21.7126 | 3 K.PTMRTCC Splice@chr   | 1.85E-13 | 0        |
| 11Nov2011 | 24993 | 895     | -10.9918 | 2 K.M+15.99 chrX@1449    | 3.03E-10 | 0.006258 |
| 11Nov2011 | 18187 | 894.4   | 2.427875 | 2 _FDSDDVT Splice@chr    | 1.40E-12 | 0        |
| 11Nov2011 | 20737 | 774.96  | 16.29715 | 2 E.DILFVINK Splice@chr  | 6.67E-11 | 0.001712 |
| 11Nov2011 | 8406  | 496.28  | -16.7598 | 2 _VIHTGSH chr1@3537     | 4.44E-10 | 0.009243 |

|           |       |         |          |                         |          |          |
|-----------|-------|---------|----------|-------------------------|----------|----------|
| 11Nov2011 | 30689 | 1000.51 | -15.4866 | 2 E.CLVVNLS Splice@chr  | 1.58E-10 | 0.003657 |
| 11Nov2011 | 30967 | 1123.26 | -4.9137  | 3 R.REGVLNF Splice@chr  | 3.50E-10 | 0.007179 |
| 11Nov2011 | 10890 | 1064.58 | -2.00842 | 1 K.YLINGNEI chr1@8687  | 5.72E-11 | 0.00159  |
| 11Nov2011 | 31439 | 962.8   | 19.96909 | 3 _GCSIVPIS Splice@chr  | 1.47E-10 | 0.003419 |
| 11Nov2011 | 5006  | 833.46  | -4.25508 | 1 R.DMVQLV chrX@9811    | 3.44E-10 | 0.007005 |
| 11Nov2011 | 10782 | 1064.58 | -2.00842 | 1 K.YLINGNEI chr1@8687  | 8.15E-11 | 0.002086 |
| 11Nov2011 | 26964 | 890.44  | 14.86661 | 2 K.GWSVPLI Splice@chr  | 2.68E-10 | 0.005506 |
| 11Nov2011 | 705   | 552.3   | 10.18569 | 2 R.TQNATAI Splice@chr  | 1.09E-10 | 0.002765 |
| 11Nov2011 | 28512 | 1135.56 | 14.02138 | 2 _DMDYAF Splice@chr    | 4.63E-12 | 7.33E-05 |
| 11Nov2011 | 10067 | 1025.61 | -11.6755 | 1 K.LGLGSL chr5@4945    | 6.03E-12 | 7.33E-05 |
| 11Nov2011 | 10063 | 677.34  | -8.57314 | 2 K.MQQFST chr5@2080    | 4.27E-10 | 0.008961 |
| 11Nov2011 | 12583 | 746.36  | -23.1469 | 2 R.SYHYVAF Splice@chr  | 2.24E-10 | 0.004884 |
| 11Nov2011 | 20639 | 833.92  | -21.2254 | 2 _IIEPYVAV Splice@chr  | 4.56E-12 | 7.33E-05 |
| 11Nov2011 | 20837 | 1090.53 | -18.1295 | 2 K.INGVTVA chr3@6296   | 7.30E-11 | 0.001837 |
| 11Nov2011 | 11546 | 1086.52 | 16.6803  | 2 V.CLTEEGK Splice@chr  | 6.28E-11 | 0.001712 |
| 11Nov2011 | 5644  | 433.76  | 2.609238 | 2 _IVDLP GPI chr3@1104  | 1.90E-10 | 0.004312 |
| 11Nov2011 | 10414 | 1089.65 | -29.1532 | 1 K.KLKSMKN chr5@3701   | 1.22E-10 | 0.003127 |
| 11Nov2011 | 26638 | 855.98  | -8.0346  | 2 K.IFTQTK+1 Splice@chr | 3.73E-10 | 0.007885 |
| 11Nov2011 | 384   | 722.34  | -10.069  | 1 R.FQGGGEI chr1@2595   | 3.38E-10 | 0.006829 |
| 11Nov2011 | 15570 | 943.57  | -2.9787  | 1 _SPLFVPKI chrX@4402   | 2.25E-10 | 0.004884 |
| 11Nov2011 | 10418 | 1063.58 | 1.14882  | 1 K.YLINGNEI chr1@8687  | 4.18E-10 | 0.008308 |
| 11Nov2011 | 17878 | 923.02  | 9.903217 | 2 R.TLNNLKV chr2@1060   | 4.82E-10 | 0.0096   |
| 11Nov2011 | 26034 | 890.44  | 14.86661 | 2 K.GWSVPLI Splice@chr  | 1.02E-11 | 2.26E-04 |
| 11Nov2011 | 7191  | 546.78  | -19.0827 | 2 K.ETETGITC chr4@1221  | 2.28E-10 | 0.00423  |
| 11Nov2011 | 21448 | 849.92  | 6.583873 | 2 Q.DSSYFVE Splice@chr  | 1.10E-12 | 0        |
| 11Nov2011 | 28987 | 968.13  | 18.26018 | 3 _GCSIVPIS Splice@chr  | 1.38E-10 | 0.003083 |
| 11Nov2011 | 10624 | 724.34  | 5.400383 | 3 V.CLTEEGK Splice@chr  | 1.71E-11 | 4.39E-04 |
| 11Nov2011 | 13730 | 1173.17 | -9.30319 | 3 K.PTMRTCC Splice@chr  | 1.60E-11 | 4.39E-04 |
| 11Nov2011 | 10321 | 1064.58 | -2.00842 | 1 K.YLINGNEI chr1@8687  | 5.61E-11 | 0.001383 |
| 11Nov2011 | 351   | 722.34  | -10.069  | 1 R.FQGGGEI chr1@2595   | 4.48E-10 | 0.0089   |
| 11Nov2011 | 1404  | 632.78  | -25.4076 | 2 _KM+15.9 Splice@chr   | 3.49E-10 | 0.006948 |
| 11Nov2011 | 522   | 702.38  | 2.001521 | 1 _DAAGLAC chr3@2528    | 1.29E-11 | 4.39E-04 |
| 11Nov2011 | 12622 | 565.83  | 14.11658 | 2 R.ISLTNANI chr5@7793  | 3.69E-10 | 0.007179 |
| 11Nov2011 | 17610 | 894.4   | 2.427875 | 2 _FSDDDVT Splice@chr   | 5.51E-12 | 0        |
| 11Nov2011 | 3528  | 457.25  | 19.59886 | 2 R.QANAVG chr5@1745    | 2.17E-10 | 0.00398  |
| 11Nov2011 | 12544 | 1130.64 | 3.300733 | 1 R.ISLTNANI chr5@7793  | 3.77E-10 | 0.007298 |
| 11Nov2011 | 18000 | 719.38  | 14.92317 | 2 R.FTQAGSE Splice@chr  | 1.01E-13 | 0        |
| 11Nov2011 | 12125 | 765.38  | -12.3766 | 1 R.SPEHAPK chr5@4294   | 1.98E-10 | 0.003676 |
| 11Nov2011 | 20171 | 833.92  | -21.2254 | 2 _IIEPYVAV Splice@chr  | 1.12E-11 | 2.26E-04 |
| 11Nov2011 | 10427 | 1064.58 | -2.00842 | 1 K.YLINGNEI chr1@8687  | 7.02E-11 | 0.001708 |
| 11Nov2011 | 16468 | 809.43  | -28.4409 | 2 K.CFRIVEIP chr2@1263  | 2.53E-10 | 0.00477  |
| 11Nov2011 | 11094 | 975.55  | -13.0268 | 1 K.LPKLDAYI chr4@1145  | 1.27E-10 | 0.003035 |
| 11Nov2011 | 25412 | 665.37  | -26.6417 | 2 Q.INNK+14 Splice@chr  | 4.57E-10 | 0.009073 |
| 11Nov2011 | 21020 | 1034.57 | -2.45085 | 2 K.FK+14.01 Splice@chr | 4.33E-11 | 0.001118 |
| 11Nov2011 | 20270 | 777.91  | 29.12834 | 2 C.TCLERYLE chrX@1533  | 5.01E-10 | 0.009836 |
| 11Nov2011 | 9973  | 1089.65 | -29.1532 | 1 K.KLKSMKN chr5@3701   | 1.53E-10 | 0.003134 |
| 11Nov2011 | 17533 | 766.36  | -1.8739  | 2 K.SDGVDV5 chr3@5860   | 3.95E-14 | 0        |

|           |       |         |          |                          |          |          |
|-----------|-------|---------|----------|--------------------------|----------|----------|
| 11Nov2011 | 26100 | 1385.74 | 7.1914   | 1 K.FQNFQAI chr2@2226    | 2.69E-11 | 6.42E-04 |
| 11Nov2011 | 25311 | 1133.59 | -6.23448 | 3 K.HQLVSAF Splice@chr   | 6.73E-13 | 0        |
| 11Nov2011 | 6069  | 741.38  | -23.1647 | 2 K.FPENRHI chr2@1477    | 4.01E-10 | 0.007894 |
| 11Nov2011 | 16966 | 894.41  | 13.57006 | 2 _FDSDDVT Splice@chr    | 6.79E-11 | 0.001708 |
| 11Nov2011 | 8820  | 547.79  | 14.47103 | 2 K.AISFVGGI chr2@1172   | 3.75E-10 | 0.007298 |
| 11Nov2011 | 27525 | 1135.06 | 15.50052 | 2 _DMDYAF Splice@chr     | 2.25E-11 | 5.79E-04 |
| 11Nov2011 | 17548 | 894.4   | 2.427875 | 2 _FDSDDVT Splice@chr    | 1.61E-11 | 4.39E-04 |
| 11Nov2011 | 6968  | 463.77  | 1.18704  | 2 K.PVNIENLI chrX@1210   | 7.61E-11 | 0.001838 |
| 11Nov2011 | 13875 | 1173.17 | -9.30319 | 3 K.PTMRTCC Splice@chr   | 5.17E-11 | 0.001319 |
| 11Nov2011 | 27443 | 1135.56 | 14.02138 | 2 _DMDYAF Splice@chr     | 1.85E-10 | 0.003495 |
| 11Nov2011 | 9597  | 1025.61 | -11.6755 | 1 K.LGLGSGI chr5@4945    | 2.10E-11 | 5.10E-04 |
| 11Nov2011 | 25629 | 849.91  | -5.21446 | 2 Q.DSSYFVE Splice@chr   | 8.90E-11 | 0.002154 |
| 11Nov2011 | 20112 | 833.92  | -21.2254 | 2 _IIEPYVAM Splice@chr   | 2.00E-10 | 0.003676 |
| 11Nov2011 | 18606 | 687.41  | 21.43028 | 2 E.M+15.99 chr2@8546    | 1.70E-10 | 0.003319 |
| 11Nov2011 | 19675 | 884.5   | 20.35842 | 2 E.LKRVKCPi chr1@7920   | 3.52E-10 | 0.007009 |
| 11Nov2011 | 17490 | 894.41  | 13.57006 | 2 _FDSDDVT Splice@chr    | 8.07E-11 | 0.002032 |
| 11Nov2011 | 6876  | 553.78  | -10.2208 | 2 R.TASQK+1 chrX@5438    | 4.49E-10 | 0.00896  |
| 11Nov2011 | 29017 | 968.47  | 23.9199  | 3 _GCSIVPIS Splice@chr   | 2.38E-10 | 0.004346 |
| 11Nov2011 | 27744 | 957.5   | 1.956888 | 3 R.FIEPIEDIF Splice@chr | 1.26E-10 | 0.003035 |
| 11Nov2011 | 11069 | 1086.01 | 9.000639 | 2 V.CLTEEGK Splice@chr   | 2.24E-11 | 5.79E-04 |
| 11Nov2011 | 25371 | 1133.59 | -6.23448 | 3 K.HQLVSAF Splice@chr   | 3.90E-12 | 0        |
| 11Nov2011 | 6756  | 519.6   | -26.5197 | 3 K.IGSM+15 chr5@1654    | 1.10E-11 | 2.26E-04 |
| 11Nov2011 | 20357 | 1090.53 | -18.1295 | 2 K.INGVTVA chr3@6296    | 2.25E-10 | 0.004104 |
| 11Nov2011 | 21401 | 849.93  | 18.38221 | 2 Q.DSSYFVE Splice@chr   | 1.58E-10 | 0.003134 |
| 11Nov2011 | 19120 | 685.88  | 4.188613 | 2 K.IVPGGGA chrX@1570    | 5.43E-14 | 0        |
| 11Nov2011 | 10361 | 1063.58 | 1.14882  | 1 K.YLINGNEI chr1@8687   | 8.27E-11 | 0.002032 |
| 11Nov2011 | 25203 | 1133.59 | -6.23448 | 3 K.HQLVSAF Splice@chr   | 9.66E-12 | 1.52E-04 |
| 11Nov2011 | 15043 | 662.86  | 7.984656 | 2 S.INM+15.5 chr4@2551   | 4.10E-10 | 0.00795  |
| 11Nov2011 | 11022 | 862.47  | 2.904885 | 1 _PIQDVYK Splice@chr    | 3.68E-10 | 0.007179 |
| 11Nov2011 | 9642  | 677.34  | -8.57314 | 2 K.MQQFSTi chr5@2080    | 2.38E-10 | 0.004346 |
| 11Nov2011 | 17884 | 719.38  | 14.92317 | 2 R.FTQAGSE Splice@chr   | 4.30E-14 | 0        |
| 11Nov2011 | 24429 | 1216.59 | -11.6275 | 2 L.RNTRNDI chr4@1012    | 2.73E-10 | 0.005075 |
| 11Nov2011 | 19711 | 858.48  | 6.006088 | 3 _LETGIKPI Splice@chr   | 4.14E-12 | 0        |
| 11Nov2011 | 31603 | 1107.03 | -11.4549 | 2 R.CIDQFQS chr3@9264    | 4.36E-10 | 0.008789 |
| 11Nov2011 | 23092 | 1366.17 | -16.3461 | 2 K.TAQFTTT Splice@chr   | 8.59E-11 | 0.002096 |
| 11Nov2011 | 13783 | 1173.5  | -13.1731 | 3 K.PTMRTCC Splice@chr   | 1.25E-12 | 0        |
| 11Nov2011 | 5274  | 831.44  | -19.0561 | 1 K.WGGGGC chr3@1095     | 1.39E-11 | 4.39E-04 |
| 11Nov2011 | 17778 | 894.41  | 13.57006 | 2 _FDSDDVT Splice@chr    | 9.56E-13 | 0        |
| 11Nov2011 | 407   | 890.47  | -8.65343 | 1 R.SSTPQLTI Splice@chr  | 3.11E-10 | 0.005973 |
| 11Nov2011 | 6017  | 741.38  | -23.1647 | 2 K.FPENRHI chr2@1477    | 1.74E-10 | 0.003375 |
| 11Nov2011 | 22901 | 910.98  | -23.6548 | 2 Y.FKNIDKD Splice@chr   | 3.16E-10 | 0.005973 |
| 11Nov2011 | 25257 | 1133.59 | -6.23448 | 3 K.HQLVSAF Splice@chr   | 1.76E-12 | 0        |
| 11Nov2011 | 8441  | 846.49  | 27.61256 | 1 R.FPGIQGA chr3@1682    | 1.43E-10 | 0.003083 |
| 11Nov2011 | 17376 | 742.38  | -26.3192 | 2 R.ETFISVEK chr5@7445   | 3.55E-10 | 0.007065 |
| 11Nov2011 | 16216 | 1106.57 | -0.93743 | 1 K.NLVCKQE chr5@1606    | 4.63E-10 | 0.009073 |
| 11Nov2011 | 8355  | 434.24  | 13.9946  | 3 _RSNDQTI chr5@6378     | 2.05E-10 | 0.003863 |
| 11Nov2011 | 29705 | 1000.51 | -15.4866 | 2 E.CLVVNLS Splice@chr   | 3.61E-10 | 0.007065 |

|           |       |         |          |                          |          |          |
|-----------|-------|---------|----------|--------------------------|----------|----------|
| 11Nov2011 | 2639  | 888.52  | 29.02223 | 1 R.YNLHTLK Splice@chr   | 4.52E-10 | 0.00896  |
| 11Nov2011 | 16621 | 833.42  | -4.62234 | 1 K.HEVTVFT chr4@1317    | 3.29E-10 | 0.006214 |
| 11Nov2011 | 30696 | 1147.25 | 13.44098 | 3 R.FQSAAG Splice@chr    | 5.26E-14 | 0        |
| 11Nov2011 | 25786 | 855.98  | -8.0346  | 2 K.IFTQTK+1 Splice@chr  | 1.74E-10 | 0.003375 |
| 11Nov2011 | 1276  | 632.78  | -25.4076 | 2 _KM+15.9 Splice@chr    | 1.40E-10 | 0.003083 |
| 11Nov2011 | 27700 | 957.5   | 1.956888 | 3 R.FIEPIEDIF Splice@chr | 6.79E-11 | 0.001708 |
| 11Nov2011 | 10027 | 1089.65 | -29.1532 | 1 K.KLKSMKN chr5@3701    | 2.14E-10 | 0.00392  |
| 11Nov2011 | 26875 | 1024.52 | -27.8903 | 2 F.K+14.016 chr4@8225   | 3.88E-10 | 0.007663 |
| 11Nov2011 | 26096 | 798.15  | -11.5616 | 4 K.SGDAGIV Splice@chr   | 1.53E-11 | 4.39E-04 |
| 11Nov2011 | 29732 | 1000.51 | -15.4866 | 2 E.CLVVNLS Splice@chr   | 7.44E-11 | 0.001773 |
| 11Nov2011 | 22858 | 784.42  | -26.6807 | 3 _LVK+14.0 Splice@chr   | 3.27E-10 | 0.006214 |
| 11Nov2011 | 10726 | 821.44  | 15.92055 | 1 K.TGFGING chrX@2647    | 2.14E-11 | 5.10E-04 |
| 11Nov2011 | 6925  | 1141.1  | -18.7175 | 2 V.KLIGTDPI Splice@chr  | 4.15E-10 | 0.008194 |
| 11Nov2011 | 29312 | 1027.59 | -24.0001 | 2 I.KNELKSKA chrX@6127   | 2.58E-10 | 0.00477  |
| 11Nov2011 | 30531 | 1062.11 | 19.8266  | 2 R.QICPSRLI chr1@1061   | 1.55E-10 | 0.003134 |
| 11Nov2011 | 27484 | 1135.56 | 14.02138 | 2 _DMDYAF Splice@chr     | 2.41E-14 | 0        |
| 11Nov2011 | 27485 | 1135.06 | 15.50052 | 2 _DMDYAF Splice@chr     | 1.37E-12 | 0        |
| 11Nov2011 | 27524 | 1135.56 | 14.02138 | 2 _DMDYAF Splice@chr     | 4.36E-10 | 0.008789 |
| 11Nov2011 | 10370 | 1064.58 | -2.00842 | 1 K.YLINGNEI chr1@8687   | 6.82E-11 | 0.001708 |
| 11Nov2011 | 10649 | 1086.01 | 9.000639 | 2 V.CLTEEGK Splice@chr   | 4.98E-12 | 0        |
| 11Nov2011 | 10925 | 975.55  | -13.0268 | 1 K.LPKLDAYI chr4@1149   | 1.16E-10 | 0.002725 |
| 11Nov2011 | 16679 | 833.42  | -4.62234 | 1 K.HEVTVFT chr4@1317    | 2.65E-10 | 0.004957 |
| 11Nov2011 | 27790 | 957.5   | 22.57714 | 3 K.LFQVLQN Splice@chr   | 3.07E-10 | 0.005973 |
| 11Nov2011 | 22808 | 784.42  | -26.6807 | 3 _LVK+14.0 Splice@chr   | 2.33E-11 | 5.79E-04 |
| 11Nov2011 | 17937 | 719.38  | 14.92317 | 2 R.FTQAGSE Splice@chr   | 4.74E-14 | 0        |
| 11Nov2011 | 25335 | 889.94  | 16.75361 | 2 K.GWSVPLI Splice@chr   | 3.23E-10 | 0.006029 |
| 11Nov2011 | 17717 | 894.4   | 2.427875 | 2 _FSDDDVT Splice@chr    | 4.09E-13 | 0        |
| 11Nov2011 | 16162 | 1106.58 | 8.124787 | 1 K.NLVCKQE chr5@1606    | 1.06E-10 | 0.00247  |
| 11Nov2011 | 20121 | 774.96  | 16.29715 | 2 E.DILFVINK Splice@chr  | 1.95E-11 | 4.39E-04 |
| 11Nov2011 | 632   | 703.38  | -2.78167 | 1 _DAAGLAC chr3@2528     | 3.97E-10 | 0.00885  |
| 11Nov2011 | 9654  | 739.4   | 18.15789 | 2 K.M+15.99 chr5@5476    | 4.40E-10 | 0.009469 |
| 11Nov2011 | 9885  | 559.79  | 11.35993 | 2 R.DGWSIGI chr4@4253    | 9.57E-11 | 0.002814 |
| 11Nov2011 | 855   | 722.35  | 3.723    | 1 R.FQGGGEI chr1@2595    | 3.33E-10 | 0.007318 |
| 11Nov2011 | 10206 | 1064.58 | -2.00842 | 1 K.YLINGNEI chr1@8687   | 1.30E-10 | 0.003871 |
| 11Nov2011 | 3436  | 928.48  | 5.067247 | 1 K.FRSHPER chr5@3821    | 2.34E-10 | 0.005325 |
| 11Nov2011 | 21076 | 849.92  | 6.583873 | 2 Q.DSSYFVE Splice@chr   | 1.33E-11 | 2.88E-04 |
| 11Nov2011 | 10903 | 724.34  | 5.400383 | 3 V.CLTEEGK Splice@chr   | 5.79E-11 | 0.002011 |
| 11Nov2011 | 5052  | 537.8   | -5.57144 | 2 K.DQGMLN chr5@2023     | 6.81E-11 | 0.002329 |
| 11Nov2011 | 26713 | 825.94  | 10.55113 | 2 R.QKMSFA Splice@chr    | 2.13E-10 | 0.004905 |
| 11Nov2011 | 19648 | 833.92  | -21.2254 | 2 _IIEPYVAV Splice@chr   | 3.14E-11 | 0.00117  |
| 11Nov2011 | 6798  | 463.77  | 1.18704  | 2 K.PVNIENLI chrX@1210   | 7.60E-11 | 0.002631 |
| 11Nov2011 | 22487 | 1366.17 | -16.3461 | 2 K.TAQFTTT Splice@chr   | 7.72E-11 | 0.002631 |
| 11Nov2011 | 29464 | 1000.5  | -25.5062 | 2 E.CLVVNLS Splice@chr   | 4.15E-10 | 0.009198 |
| 11Nov2011 | 14379 | 1075.05 | -16.1169 | 2 R.TCSK+14. chr2@1253   | 2.98E-10 | 0.006439 |
| 11Nov2011 | 19731 | 774.95  | 3.355236 | 2 E.DILFVINK Splice@chr  | 4.13E-11 | 0.001498 |
| 11Nov2011 | 415   | 722.34  | -10.069  | 1 R.FQGGGEI chr1@2595    | 3.38E-10 | 0.007495 |
| 11Nov2011 | 417   | 723.35  | -0.92778 | 1 R.FQGGGEI chr1@2595    | 4.61E-10 | 0.009755 |

|           |       |         |          |                          |          |          |
|-----------|-------|---------|----------|--------------------------|----------|----------|
| 11Nov2011 | 11833 | 625.82  | -20.2839 | 2 R.K+14.016 chrX@1356   | 4.27E-10 | 0.009246 |
| 11Nov2011 | 6697  | 1107.56 | -21.6943 | 1 _..SSLDKES( chr5@1239  | 6.34E-11 | 0.0022   |
| 11Nov2011 | 18796 | 685.88  | 4.188613 | 2 K.IVPGGGA chrX@1570    | 1.24E-15 | 0        |
| 11Nov2011 | 10094 | 566.31  | 21.45326 | 2 R.EVAQLEC chr5@1706    | 2.24E-10 | 0.005021 |
| 11Nov2011 | 662   | 552.3   | 10.18569 | 2 R.TQNATAI Splice@chr   | 8.35E-11 | 0.002631 |
| 11Nov2011 | 25593 | 855.47  | -17.786  | 2 K.IFTQTK+1 Splice@chr  | 3.22E-10 | 0.007196 |
| 11Nov2011 | 9446  | 677.84  | -11.0533 | 2 K.MQQFST( chr5@2080    | 3.55E-10 | 0.007912 |
| 11Nov2011 | 2728  | 801.45  | 3.812604 | 1 R.IEAGGGC chr5@8776    | 1.91E-10 | 0.004429 |
| 11Nov2011 | 5977  | 936.48  | 27.86052 | 1 K.LNGGYEC chr2@1191    | 5.24E-11 | 0.001885 |
| 11Nov2011 | 5521  | 876.4   | -19.8707 | 1 K.TEDEARR chrX@1138    | 4.69E-11 | 0.001827 |
| 11Nov2011 | 10783 | 975.55  | -13.0268 | 1 K.LPKLDAYI chr4@1149   | 1.06E-10 | 0.003253 |
| 11Nov2011 | 10845 | 475.27  | -19.9473 | 2 R.LVSIFWG chr5@1340    | 1.42E-10 | 0.004157 |
| 11Nov2011 | 29429 | 1000.5  | -25.5062 | 2 E.CLVVNLS' Splice@chr  | 1.12E-10 | 0.003309 |
| 11Nov2011 | 27207 | 876.98  | -22.6214 | 2 V.FPCK+14. chrX@2447   | 2.00E-10 | 0.004604 |
| 11Nov2011 | 5103  | 433.76  | 2.609238 | 2 _..IVDLP GPI chr3@1104 | 5.05E-11 | 0.001885 |
| 11Nov2011 | 9826  | 559.79  | 11.35993 | 2 R.DGWSIG( chr4@4253    | 1.23E-10 | 0.003492 |
| 11Nov2011 | 23517 | 831.45  | -1.72693 | 2 R.NTRNQLf chrX@7297    | 2.56E-10 | 0.006047 |
| 11Nov2011 | 5694  | 876.4   | -19.8707 | 1 K.TEDEARR chrX@1138    | 4.26E-11 | 0.001633 |
| 11Nov2011 | 27081 | 957.5   | 1.956888 | 3 R.FIEPIEDIF Splice@chr | 2.89E-10 | 0.006439 |
| 11Nov2011 | 3414  | 412.23  | 25.3069  | 2 R.IASYQGG chrX@1679    | 4.60E-11 | 0.001762 |
| 11Nov2011 | 10400 | 624.33  | 9.752617 | 2 R.QHAYAVi chrX@1402    | 4.57E-10 | 0.009635 |
| 11Nov2011 | 9686  | 507.78  | 21.88395 | 2 Q.DPVEDG Splice@chr    | 1.31E-10 | 0.003932 |
| 11Nov2011 | 12499 | 499.28  | 5.144758 | 2 _..VYNIYVAi chrX@1610  | 3.90E-10 | 0.008801 |
| 11Nov2011 | 16420 | 717.88  | 5.023339 | 2 R.LNIAMN\ Splice@chr   | 4.78E-10 | 0.00998  |
| 11Nov2011 | 20824 | 971.53  | -6.91774 | 2 R.KKECGDK chr3@1197    | 2.45E-10 | 0.005751 |
| 11Nov2011 | 8199  | 434.24  | 13.9946  | 3 _..RSNDQTI chr5@6378   | 1.70E-10 | 0.004379 |
| 11Nov2011 | 2431  | 440.26  | -14.0476 | 2 _..VSLAHVP chr4@3795   | 2.34E-10 | 0.005325 |
| 11Nov2011 | 22594 | 1366.16 | -23.681  | 2 K.TAQTF TT Splice@chr  | 1.52E-10 | 0.004157 |
| 11Nov2011 | 9469  | 559.79  | 11.35993 | 2 R.DGWSIG( chr4@4253    | 3.25E-10 | 0.007196 |
| 11Nov2011 | 7552  | 454.75  | 8.810814 | 2 K.TDLAYLG chr4@1543    | 8.61E-11 | 0.002631 |
| 11Nov2011 | 24009 | 1042.22 | 4.867678 | 3 R.K+14.016 chr4@6097   | 1.72E-10 | 0.004379 |
| 11Nov2011 | 10037 | 566.31  | 21.45326 | 2 R.EVAQLEC chr5@1706    | 1.32E-10 | 0.003932 |
| 11Nov2011 | 28596 | 1272.28 | 27.03865 | 3 K.FAVADEE Splice@chr   | 6.45E-11 | 0.0022   |
| 11Nov2011 | 11884 | 625.82  | -11.1921 | 2 I.QLEDIEFIS Splice@chr | 2.55E-10 | 0.006047 |
| 11Nov2011 | 25488 | 1384.74 | 9.615872 | 1 K.FQNFAQI chr2@2226    | 2.50E-10 | 0.005931 |
| 11Nov2011 | 30468 | 1376.97 | 5.086429 | 3 P.PM+15.9 Splice@chr   | 4.85E-11 | 0.001885 |
| 11Nov2011 | 20810 | 648.02  | 16.91749 | 3 R.ISNMTNL chr4@2735    | 4.22E-10 | 0.009246 |
| 11Nov2011 | 19722 | 833.92  | -21.2254 | 2 _..IIEPYVAV Splice@chr | 1.76E-12 | 0        |
| 11Nov2011 | 5474  | 876.4   | -19.8707 | 1 K.TEDEARR chrX@1138    | 4.20E-10 | 0.009246 |
| 11Nov2011 | 29373 | 1256.95 | -27.1488 | 3 K.FICETES E chr4@3168  | 1.02E-10 | 0.003197 |
| 11Nov2011 | 31837 | 1277.67 | 3.563978 | 2 R.DGSWVIL Splice@chr   | 2.07E-12 | 0        |
| 11Nov2011 | 10240 | 1063.58 | 1.14882  | 1 K.YLINGNEI chr1@8687   | 3.46E-10 | 0.007677 |
| 11Nov2011 | 17732 | 719.38  | 14.92317 | 2 R.FTQAGSE Splice@chr   | 3.24E-12 | 1.47E-04 |
| 11Nov2011 | 11938 | 533.82  | -1.88988 | 2 K.NTVLKYT' Splice@chr  | 1.54E-10 | 0.004157 |
| 11Nov2011 | 26754 | 825.94  | 10.55113 | 2 R.QKMSFA' Splice@chr   | 4.43E-11 | 0.001696 |
| 11Nov2011 | 19525 | 1058.97 | -25.0194 | 2 F.QKFYSFQ chr2@4922    | 2.42E-11 | 9.11E-04 |
| 11Nov2011 | 20457 | 1034.57 | -2.45085 | 2 K.FK+14.01 Splice@chr  | 2.94E-12 | 0        |

|           |       |         |          |                         |          |          |
|-----------|-------|---------|----------|-------------------------|----------|----------|
| 11Nov2011 | 22539 | 1366.17 | -16.3461 | 2 K.TAQTTFTT Splice@chr | 3.74E-12 | 1.47E-04 |
| 11Nov2011 | 3735  | 473.76  | -9.231   | 2 R.TSGALSL chr1@2011   | 4.19E-10 | 0.009198 |
| 11Nov2011 | 11876 | 533.82  | -1.88988 | 2 K.NTVLKYT Splice@chr  | 1.75E-10 | 0.004379 |
| 11Nov2011 | 11877 | 746.36  | -23.1469 | 2 R.SYHYVAF Splice@chr  | 2.66E-10 | 0.006281 |
| 11Nov2011 | 23797 | 1216.58 | -19.8654 | 2 L.RNTRNDI chr4@1012   | 4.50E-10 | 0.009635 |
| 11Nov2011 | 621   | 702.38  | 2.001521 | 1 _DAAGLAC chr3@2528    | 5.12E-12 | 1.47E-04 |
| 11Nov2011 | 9415  | 559.79  | 11.35993 | 2 R.DGWSIG chr4@4253    | 4.28E-10 | 0.009301 |
| 11Nov2011 | 6749  | 1107.56 | -21.6943 | 1 _SSLDKESC chr5@1239   | 3.16E-11 | 0.00117  |
| 11Nov2011 | 25552 | 855.48  | -6.07153 | 2 K.IFTQTK+1 Splice@chr | 2.52E-10 | 0.006047 |
| 11Nov2011 | 14714 | 943.57  | -2.9787  | 1 _SPLFVPKF chrX@4402   | 1.30E-10 | 0.003871 |
| 11Nov2011 | 31857 | 1277.16 | -2.9653  | 2 R.DGSWWII Splice@chr  | 3.66E-12 | 1.47E-04 |
| 11Nov2011 | 9768  | 559.79  | 11.35993 | 2 R.DGWSIG chr4@4253    | 1.49E-10 | 0.004157 |
| 11Nov2011 | 11945 | 625.82  | -20.2839 | 2 R.K+14.016 chrX@1356  | 1.99E-10 | 0.004604 |
| 11Nov2011 | 28438 | 968.46  | 13.6538  | 3 _GCSIVPIS Splice@chr  | 3.57E-10 | 0.007912 |
| 11Nov2011 | 14621 | 944.58  | 4.081799 | 1 _SPLFVPKF chrX@4402   | 1.30E-10 | 0.003871 |
| 11Nov2011 | 12270 | 565.83  | 14.11658 | 2 R.ISLTNANI chr5@7793  | 2.63E-10 | 0.006227 |
| 11Nov2011 | 20116 | 824.46  | -15.3181 | 3 _TFSVPDLI chr5@1348   | 2.14E-10 | 0.004905 |
| 11Nov2011 | 28500 | 1272.28 | 27.03865 | 3 K.FAVADEE Splice@chr  | 1.21E-14 | 0        |
| 11Nov2011 | 27744 | 1105.54 | 20.81581 | 2 I.IEGHMGK Splice@chr  | 1.84E-10 | 0.004429 |
| 11Nov2011 | 10347 | 624.33  | 9.752617 | 2 R.QHAYAVI chrX@1402   | 3.08E-10 | 0.006732 |
| 11Nov2011 | 2043  | 858.49  | -10.5443 | 1 _TVASRAP chrX@7067    | 3.49E-10 | 0.007797 |
| 11Nov2011 | 28896 | 955.86  | 18.18234 | 3 _FPHTRSSI chr2@1243   | 3.39E-10 | 0.007495 |
| 11Nov2011 | 15908 | 1106.58 | 8.124787 | 1 K.NLVCKQE chr5@1606   | 2.84E-10 | 0.006386 |
| 11Nov2011 | 30691 | 1147.25 | 13.44098 | 3 R.FQSAAG Splice@chr   | 1.19E-15 | 0        |
| 11Nov2011 | 18448 | 852.9   | -9.81548 | 2 R.FQMQRNL chr1@1224   | 2.46E-10 | 0.005873 |
| 11Nov2011 | 17641 | 719.38  | 14.92317 | 2 R.FTQAGSE Splice@chr  | 1.62E-13 | 0        |
| 11Nov2011 | 14114 | 762.84  | -28.3604 | 2 G.TSK+14.C chr5@9327  | 7.06E-11 | 0.00239  |
| 11Nov2011 | 16185 | 599.34  | -5.64446 | 3 _INKFLIFK chr4@1511   | 2.75E-10 | 0.006333 |
| 11Nov2011 | 6939  | 875.49  | 11.27984 | 2 K.KIILMM+ chr4@5840   | 2.38E-10 | 0.005631 |
| 11Nov2011 | 2622  | 510.3   | 12.8833  | 2 R.RHVAYVF chr1@1479   | 2.61E-11 | 0.001042 |
| 11Nov2011 | 349   | 722.35  | 3.723    | 1 R.FQGGGEI chr1@2595   | 4.48E-10 | 0.00831  |
| 11Nov2011 | 20690 | 804.91  | 25.79416 | 2 _LTMTWN chr1@4513     | 3.55E-10 | 0.006339 |
| 11Nov2011 | 9335  | 566.31  | 21.45326 | 2 R.EVAQLEC chr5@1706   | 4.60E-11 | 8.67E-04 |
| 11Nov2011 | 10657 | 1000.02 | 11.70688 | 2 R.LVSERYG chr2@8997   | 1.08E-10 | 0.002639 |
| 11Nov2011 | 548   | 703.38  | -2.78167 | 1 _DAAGLAC chr3@2528    | 1.02E-11 | 8.49E-05 |
| 11Nov2011 | 17564 | 685.88  | 4.188613 | 2 K.IVPGGGA chrX@1570   | 2.29E-12 | 8.49E-05 |
| 11Nov2011 | 21324 | 1366.17 | -16.3461 | 2 K.TAQTTFTT Splice@chr | 4.91E-11 | 8.67E-04 |
| 11Nov2011 | 5305  | 876.4   | -19.8707 | 1 K.TEDEARR chrX@1138   | 4.26E-11 | 7.94E-04 |
| 11Nov2011 | 9552  | 1064.58 | -2.00842 | 1 K.YLINGNEI chr1@8687  | 8.02E-11 | 0.001763 |
| 11Nov2011 | 26899 | 1376.97 | 5.086429 | 3 P.PM+15.9 Splice@chr  | 4.74E-12 | 8.49E-05 |
| 11Nov2011 | 4732  | 537.79  | -24.2187 | 2 K.DQGMLN chr5@2023    | 3.85E-11 | 7.15E-04 |
| 11Nov2011 | 538   | 702.38  | 2.001521 | 1 _DAAGLAC chr3@2528    | 1.29E-11 | 8.49E-05 |
| 11Nov2011 | 7624  | 434.24  | 13.9946  | 3 _RSNDQTI chr5@6378    | 4.58E-10 | 0.008647 |
| 11Nov2011 | 15306 | 717.88  | 5.023339 | 2 R.LNIAMN Splice@chr   | 1.99E-10 | 0.004251 |
| 11Nov2011 | 5357  | 876.4   | -19.8707 | 1 K.TEDEARR chrX@1138   | 4.26E-11 | 7.94E-04 |
| 11Nov2011 | 28247 | 1129.08 | -6.57578 | 2 R.K+14.016 chr2@5339  | 2.44E-10 | 0.004858 |
| 11Nov2011 | 27551 | 1062.1  | 10.38858 | 2 R.QICPSRLI chr1@1061  | 5.26E-10 | 0.009776 |

|           |       |         |          |                          |          |          |
|-----------|-------|---------|----------|--------------------------|----------|----------|
| 11Nov2011 | 9220  | 559.79  | 11.35993 | 2 R.DGWSIG chr4@425      | 4.43E-10 | 0.00831  |
| 11Nov2011 | 9485  | 1064.58 | -2.00842 | 1 K.YLINGNEI chr1@868    | 8.59E-11 | 0.001833 |
| 11Nov2011 | 9393  | 566.31  | 21.45326 | 2 R.EVAQLEC chr5@170     | 1.09E-10 | 0.002639 |
| 11Nov2011 | 6217  | 553.78  | -10.2208 | 2 R.TASQK+1 chrX@543     | 8.12E-11 | 0.001763 |
| 11Nov2011 | 25038 | 825.94  | 10.55113 | 2 R.QKMSFA Splice@chr    | 9.39E-11 | 0.002055 |
| 11Nov2011 | 4535  | 948.48  | 18.96187 | 1 R.ENKENW Splice@chr    | 4.55E-10 | 0.008513 |
| 11Nov2011 | 26341 | 791.9   | -17.5179 | 4 K.SGTIFDNI Splice@chr  | 8.63E-18 | 0        |
| 11Nov2011 | 11504 | 565.83  | 14.11658 | 2 R.ISLTNANI chr5@779    | 2.52E-10 | 0.004858 |
| 11Nov2011 | 3228  | 412.23  | 25.3069  | 2 R.IASYQGG chrX@167     | 3.07E-11 | 4.83E-04 |
| 11Nov2011 | 24200 | 1003.18 | 7.145987 | 3 R.CWNRRRA Splice@chr   | 3.79E-12 | 8.49E-05 |
| 11Nov2011 | 19068 | 759.4   | -15.0495 | 2 K.FIDANLQ chr4@820     | 3.48E-10 | 0.006204 |
| 11Nov2011 | 25359 | 957.5   | 1.956888 | 3 R.FIEPIEDIF Splice@chr | 2.10E-10 | 0.004311 |
| 11Nov2011 | 8749  | 1025.61 | -11.6755 | 1 K.LGLGSGL chr5@494     | 5.48E-12 | 8.49E-05 |
| 11Nov2011 | 27104 | 1377    | 26.85161 | 3 P.PM+15.9 Splice@chr   | 1.48E-11 | 1.66E-04 |
| 11Nov2011 | 22125 | 521.3   | 24.95499 | 2 R.NLNEVEII chr4@130    | 1.56E-10 | 0.003684 |
| 11Nov2011 | 5132  | 876.4   | -19.8707 | 1 K.TEDEARR chrX@113     | 4.26E-11 | 7.94E-04 |
| 11Nov2011 | 10666 | 999.52  | 13.3868  | 2 R.LVSERYG chr2@899     | 1.80E-10 | 0.003684 |
| 11Nov2011 | 18037 | 817.44  | -10.2094 | 2 G.KSLANNI Splice@chr   | 4.62E-10 | 0.008647 |
| 11Nov2011 | 23875 | 1385.74 | 7.1914   | 1 K.FQNFQAI chr2@222     | 1.88E-10 | 0.003752 |
| 11Nov2011 | 18897 | 824.46  | -15.3181 | 3 _TFSVPDLI chr5@134     | 2.97E-10 | 0.005318 |
| 11Nov2011 | 11342 | 533.82  | -1.88988 | 2 K.NTVLKYT Splice@chr   | 3.96E-11 | 7.15E-04 |
| 11Nov2011 | 21218 | 1366.17 | -16.3461 | 2 K.TAQTTT Splice@chr    | 2.28E-11 | 3.28E-04 |
| 11Nov2011 | 6272  | 1107.56 | -21.6943 | 1 _SSLDKESC chr5@123     | 1.78E-11 | 1.66E-04 |
| 11Nov2011 | 29179 | 506.57  | 1.126789 | 3 _DWHHTF Splice@chr     | 1.98E-10 | 0.004182 |
| 11Nov2011 | 23509 | 849.41  | -3.23735 | 2 Q.DSSYFVE Splice@chr   | 1.86E-10 | 0.003752 |
| 11Nov2011 | 27629 | 1147.24 | 4.705638 | 3 R.FQSAAIG Splice@chr   | 1.30E-14 | 0        |
| 11Nov2011 | 3322  | 928.47  | -5.72533 | 1 K.FRSHPER chr5@382     | 3.89E-10 | 0.007088 |
| 11Nov2011 | 10102 | 975.55  | -13.0268 | 1 K.LPKLDAYI chr4@114    | 1.33E-10 | 0.003291 |
| 11Nov2011 | 11561 | 565.82  | -3.62141 | 2 R.ISLTNANI chr5@779    | 3.29E-10 | 0.005933 |
| 11Nov2011 | 8673  | 752.88  | -14.2545 | 2 R.GKCNGG chr4@512      | 2.72E-10 | 0.004981 |
| 11Nov2011 | 1998  | 858.49  | -10.5443 | 1 _TVASRAP chrX@706      | 3.05E-10 | 0.005454 |
| 11Nov2011 | 6337  | 463.77  | 1.18704  | 2 K.PVNIENLI chrX@121    | 1.51E-10 | 0.003684 |
| 11Nov2011 | 10065 | 993.53  | -6.94889 | 1 _SSLLFVDC chrX@137     | 2.90E-11 | 4.83E-04 |
| 11Nov2011 | 24036 | 1385.75 | 14.42536 | 1 K.FQNFQAI chr2@222     | 2.14E-10 | 0.004381 |
| 11Nov2011 | 22142 | 831.45  | -1.72693 | 2 R.NTRNQLI chrX@729     | 4.39E-10 | 0.008177 |
| 11Nov2011 | 17990 | 664.7   | 1.197202 | 3 _PTLNK+1 chr1@652      | 2.48E-11 | 4.08E-04 |
| 11Nov2011 | 16435 | 719.38  | 14.92317 | 2 R.FTQAGSE Splice@chr   | 4.14E-13 | 0        |
| 11Nov2011 | 16437 | 923.02  | 9.903217 | 2 R.TLNNLKV chr2@106     | 5.08E-10 | 0.009721 |
| 11Nov2011 | 4318  | 516.29  | -20.3315 | 2 R.EAVKVDI chr4@130     | 2.39E-10 | 0.004858 |
| 11Nov2011 | 18448 | 833.92  | -21.2254 | 2 _IIEPYVAV Splice@chr   | 2.67E-11 | 4.83E-04 |
| 11Nov2011 | 19718 | 849.92  | 6.583873 | 2 Q.DSSYFVE Splice@chr   | 2.07E-10 | 0.004311 |
| 11Nov2011 | 13656 | 944.58  | 4.081799 | 1 _SPLFVPKI chrX@440     | 1.30E-10 | 0.003148 |
| 11Nov2011 | 13657 | 691.85  | 23.12212 | 2 _M+15.99 chr5@102      | 5.45E-10 | 0.009893 |
| 11Nov2011 | 6282  | 463.77  | 1.18704  | 2 K.PVNIENLI chrX@121    | 7.60E-11 | 0.00154  |
| 11Nov2011 | 10152 | 724.34  | 5.400383 | 3 V.CLTEEGK Splice@chr   | 2.89E-12 | 8.49E-05 |
| 11Nov2011 | 19870 | 1056.89 | 23.76658 | 3 I.SRVEDDS Splice@chr   | 2.10E-15 | 0        |
| 11Nov2011 | 21270 | 1366.16 | -23.681  | 2 K.TAQTTT Splice@chr    | 1.18E-11 | 8.49E-05 |

|           |       |         |          |                         |          |          |
|-----------|-------|---------|----------|-------------------------|----------|----------|
| 11Nov2011 | 15856 | 556.35  | 22.82847 | 2 K.NKQIPNV chr3@6739   | 3.42E-10 | 0.006134 |
| 11Nov2011 | 23505 | 849.91  | -5.21446 | 2 Q.DSSYFVE Splice@chr  | 3.14E-10 | 0.005519 |
| 11Nov2011 | 25257 | 1384.83 | 6.880617 | 1 K.KSKTEILK chr3@1068  | 4.04E-10 | 0.007363 |
| 11Nov2011 | 26422 | 1272.28 | 27.03865 | 3 K.FAVADEE Splice@chr  | 2.85E-15 | 0        |
| 11Nov2011 | 9681  | 624.33  | 9.752617 | 2 R.QHAYAVI chrX@1402   | 1.27E-10 | 0.003076 |
| 11Nov2011 | 9162  | 559.79  | 11.35993 | 2 R.DGWSIGI chr4@4253   | 2.93E-10 | 0.005034 |
| 11Nov2011 | 13154 | 762.84  | -28.3604 | 2 G.TSK+14.C chr5@9327  | 1.04E-10 | 0.002578 |
| 11Nov2011 | 29160 | 506.57  | 1.126789 | 3 _DWHHTF Splice@chr    | 1.88E-10 | 0.003752 |
| 11Nov2011 | 15333 | 599.34  | -5.64446 | 3 _INKFLIFK chr4@1511   | 3.72E-10 | 0.006609 |
| 11Nov2011 | 11542 | 1130.64 | 3.300733 | 1 R.ISLTNANI chr5@7793  | 5.40E-10 | 0.009893 |
| 11Nov2011 | 18505 | 833.92  | -21.2254 | 2 _IIEPYVAV Splice@chr  | 1.69E-10 | 0.003684 |
| 11Nov2011 | 8848  | 559.79  | 11.35993 | 2 R.DGWSIGI chr4@4253   | 5.02E-10 | 0.009656 |
| 11Nov2011 | 26048 | 980.48  | -7.04314 | 3 K.SGTIFDNI Splice@chr | 2.79E-10 | 0.005034 |
| 11Nov2011 | 17507 | 685.88  | 4.188613 | 2 K.IVPGGGA chrX@1570   | 5.31E-12 | 8.49E-05 |
| 11Nov2011 | 8796  | 559.79  | 11.35993 | 2 R.DGWSIGI chr4@4253   | 5.01E-10 | 0.009656 |
| 11Nov2011 | 19566 | 972.04  | 1.604764 | 2 R.KKECGDK chr3@1197   | 6.88E-11 | 0.00147  |
| 11Nov2011 | 16489 | 719.38  | 14.92317 | 2 R.FTQAGSE Splice@chr  | 2.73E-13 | 0        |
| 11Nov2011 | 9074  | 1161.66 | -19.4191 | 1 K.NSKDKLV chr5@1250   | 1.02E-10 | 0.002429 |
| 11Nov2011 | 11263 | 533.82  | -1.88988 | 2 K.NTVLKYT Splice@chr  | 3.04E-11 | 4.83E-04 |
| 11Nov2011 | 9501  | 1089.65 | -29.1532 | 1 K.KLKSMKN chr5@3701   | 8.12E-11 | 0.001763 |
| 11Nov2011 | 9508  | 1063.58 | 1.14882  | 1 K.YLINGNEI chr1@8687  | 5.28E-10 | 0.009837 |
| 11Nov2011 | 13082 | 762.84  | -28.3604 | 2 G.TSK+14.C chr5@9327  | 1.16E-10 | 0.002855 |
| 11Nov2011 | 5644  | 936.48  | 27.86052 | 1 K.LNGGYEC chr2@1191   | 3.53E-10 | 0.006339 |
| 11Nov2011 | 2595  | 559.32  | -14.3208 | 2 K.SRNFAQKII chr5@1787 | 3.53E-10 | 0.006339 |
| 12Oct2011 | 4339  | 566.31  | 21.45326 | 2 R.EVAQLEC chr5@1706   | 3.80E-10 | 0.007916 |
| 12Oct2011 | 472   | 702.38  | 2.001521 | 1 _DAAGLAC chr3@2528    | 3.90E-10 | 0.008096 |
| 12Oct2011 | 6273  | 724.9   | -9.19028 | 2 R.LTFTLTRF chr3@8571  | 1.99E-10 | 0.004131 |
| 12Oct2011 | 4054  | 559.79  | 11.35993 | 2 R.DGWSIGI chr4@4253   | 3.79E-10 | 0.007916 |
| 12Oct2011 | 1512  | 412.23  | 25.3069  | 2 R.IASYQGG chrX@1679   | 3.03E-11 | 2.34E-04 |
| 12Oct2011 | 108   | 722.35  | 3.723    | 1 R.FQGGGEI chr1@2595   | 3.38E-10 | 0.007381 |
| 12Oct2011 | 4010  | 559.79  | 11.35993 | 2 R.DGWSIGI chr4@4253   | 2.93E-10 | 0.006051 |
| 12Oct2011 | 1272  | 439.74  | 18.7116  | 2 R.SIAMFGP chr2@4157   | 8.67E-11 | 0.001518 |
| 12Oct2011 | 8908  | 1090.53 | -18.1295 | 2 K.INGVTVA chr3@6296   | 4.37E-10 | 0.009625 |
| 12Oct2011 | 6168  | 763.35  | -17.5035 | 2 G.TSK+14.C chr5@9327  | 1.61E-10 | 0.003953 |
| 12Oct2011 | 2016  | 516.29  | -20.3315 | 2 R.EAVKVDI chr4@1303   | 2.68E-10 | 0.006386 |
| 12Oct2011 | 4222  | 559.79  | 11.35993 | 2 R.DGWSIGI chr4@4253   | 3.78E-10 | 0.008769 |
| 12Oct2011 | 8852  | 1049.52 | 5.532542 | 3 G.DQSVDSI chr4@9163   | 2.51E-10 | 0.006012 |
| 12Oct2011 | 5523  | 565.83  | 14.11658 | 2 R.ISLTNANI chr5@7793  | 2.11E-10 | 0.005101 |
| 12Oct2011 | 7548  | 1288.7  | -18.58   | 2 K.TKKQKKK chrX@6244   | 1.31E-10 | 0.003372 |
| 12Oct2011 | 2064  | 516.3   | -0.88714 | 2 R.EAVKVDI chr4@1303   | 9.49E-11 | 0.002796 |
| 12Oct2011 | 1658  | 947.5   | 21.47418 | 1 R.DLTNDITI Splice@chr | 1.05E-10 | 0.003213 |
| 12Oct2011 | 9100  | 515.29  | -6.17134 | 3 K.PNFTVILS chr4@1642  | 1.52E-10 | 0.003749 |
| 12Oct2011 | 1401  | 401.74  | 27.30093 | 2 R.IEAGGGC chr5@8776   | 1.85E-10 | 0.004947 |
| 12Oct2011 | 6450  | 724.9   | -9.19028 | 2 R.LTFTLTRF chr3@8571  | 5.02E-10 | 0.00991  |
| 12Oct2011 | 4546  | 566.31  | 21.45326 | 2 R.EVAQLEC chr5@1706   | 1.22E-10 | 0.003372 |
| 12Oct2011 | 3787  | 678.83  | -9.90496 | 2 K.M+15.99 chr1@1451   | 3.33E-10 | 0.00824  |
| 12Oct2011 | 5908  | 966.47  | 15.71935 | 2 _QKNCKEI chrX@1368    | 3.19E-10 | 0.00824  |

|           |      |         |          |                        |          |          |
|-----------|------|---------|----------|------------------------|----------|----------|
| 12Oct2011 | 1649 | 516.29  | -20.3315 | 2 R.EAVKVDI chr4@1305  | 3.45E-10 | 0.008472 |
| 12Oct2011 | 3752 | 678.83  | -9.90496 | 2 K.M+15.99 chr1@1451  | 3.33E-10 | 0.00824  |
| 12Oct2011 | 85   | 722.35  | 3.723    | 1 R.FQGGGEI chr1@2595  | 3.38E-10 | 0.00824  |
| 12Oct2011 | 1995 | 876.41  | -8.50606 | 1 K.TEDEARR chrX@1138  | 4.26E-11 | 0.001434 |
| 12Oct2011 | 1691 | 516.3   | -0.88714 | 2 R.EAVKVDI chr4@1305  | 2.95E-10 | 0.00805  |
| 12Oct2011 | 5909 | 965.97  | 17.45768 | 2 _QKNCKEI chrX@1368   | 2.56E-10 | 0.006596 |
| 12Oct2011 | 5877 | 965.97  | 17.45768 | 2 _QKNCKEI chrX@1368   | 2.83E-11 | 0.001185 |
| 12Oct2011 | 5332 | 635.82  | -23.8438 | 2 R.FSWFAQI chr5@1137  | 3.02E-10 | 0.008294 |
| 12Oct2011 | 6057 | 966.47  | 15.71935 | 2 _QKNCKEI chrX@1368   | 3.48E-10 | 0.00985  |
| 12Oct2011 | 5985 | 966.47  | 15.71935 | 2 _QKNCKEI chrX@1368   | 2.40E-10 | 0.006028 |
| 12Oct2011 | 3715 | 868.43  | 10.92162 | 1 K.SSSGSLSS chr2@1132 | 1.88E-10 | 0.004873 |
| 12Oct2011 | 5599 | 1346.13 | -3.69865 | 2 _QVREMH Splice@chr   | 3.34E-10 | 0.008977 |
| 12Oct2011 | 7797 | 1049.53 | 15.08228 | 3 G.DQSVDSI chr4@9165  | 3.52E-10 | 0.00985  |
| 12Oct2011 | 5573 | 1345.13 | -23.5213 | 2 _QVREMH Splice@chr   | 1.30E-10 | 0.003483 |
| 12Oct2011 | 5950 | 966.47  | 15.71935 | 2 _QKNCKEI chrX@1368   | 7.27E-11 | 0.002092 |
| 12Oct2011 | 2000 | 876.41  | -8.50606 | 1 K.TEDEARR chrX@1138  | 4.26E-11 | 0.001328 |
| 12Oct2011 | 1968 | 876.41  | -8.50606 | 1 K.TEDEARR chrX@1138  | 4.26E-11 | 0.001328 |
| 12Oct2011 | 6058 | 965.97  | 17.45768 | 2 _QKNCKEI chrX@1368   | 1.34E-10 | 0.003483 |
| 12Oct2011 | 69   | 722.35  | 3.723    | 1 R.FQGGGEI chr1@2595  | 3.38E-10 | 0.008977 |
| 12Oct2011 | 5390 | 897.42  | -27.6753 | 3 _QVREMH Splice@chr   | 1.03E-10 | 0.00282  |
| 12Oct2011 | 365  | 702.38  | 2.001521 | 1 _DAAGLAC chr3@2528   | 8.79E-11 | 0.00282  |
| 12Oct2011 | 5374 | 1345.63 | -24.7692 | 2 _QVREMH Splice@chr   | 7.79E-11 | 0.00282  |
| 12Oct2011 | 5342 | 1345.13 | -23.5213 | 2 _QVREMH Splice@chr   | 2.44E-10 | 0.008527 |
| 12Oct2011 | 1523 | 1033.52 | -22.3443 | 1 K.QSLQTFP chr5@4058  | 8.25E-11 | 0.00282  |
| 12Oct2011 | 7087 | 687.41  | 21.43028 | 2 E.M+15.99 chr2@8546  | 1.37E-10 | 0.003867 |
| 12Oct2011 | 3762 | 559.79  | 11.35993 | 2 R.DGWSIGI chr4@4255  | 9.94E-11 | 0.00282  |
| 12Oct2011 | 7787 | 990.5   | -11.7554 | 2 F.RLSESELE chr4@7519 | 1.60E-10 | 0.004903 |
| 12Oct2011 | 4187 | 560.82  | 28.56613 | 2 R.PDFSLNS chr3@3320  | 1.88E-10 | 0.006497 |
| 12Oct2011 | 3398 | 868.43  | 10.92162 | 1 K.SSSGSLSS chr2@1132 | 2.26E-10 | 0.007212 |
| 12Oct2011 | 9399 | 809.11  | 19.47063 | 3 _AKNATKY chr1@3095   | 9.08E-11 | 0.003095 |
| 12Oct2011 | 7956 | 1117.55 | 14.46641 | 2 I.IHQMHM chr5@6008   | 3.33E-10 | 0.009377 |
| 12Oct2011 | 6787 | 1288.71 | -10.8067 | 2 K.TKKQKKK chrX@6244  | 7.29E-11 | 0.002882 |
| 12Oct2011 | 6740 | 1288.7  | -18.58   | 2 K.TKKQKKK chrX@6244  | 3.18E-10 | 0.008903 |
| 12Oct2011 | 1953 | 876.41  | -8.50606 | 1 K.TEDEARR chrX@1138  | 1.63E-10 | 0.004386 |
| 12Oct2011 | 5557 | 897.42  | -27.6753 | 3 _QVREMH Splice@chr   | 1.41E-10 | 0.003847 |
| 12Oct2011 | 3929 | 559.79  | 11.35993 | 2 R.DGWSIGI chr4@4255  | 1.06E-10 | 0.003095 |
| 12Oct2011 | 8109 | 1090.53 | -18.1295 | 2 K.INGVTVA chr3@6296  | 3.16E-10 | 0.008903 |
| 12Oct2011 | 48   | 722.35  | 3.723    | 1 R.FQGGGEI chr1@2595  | 3.38E-10 | 0.009377 |
| 12Oct2011 | 8626 | 1144.09 | 21.82295 | 2 K.NSRFLSK chr1@8068  | 2.71E-10 | 0.008171 |
| 12Oct2011 | 8143 | 515.29  | -6.17134 | 3 K.PNFTVILS chr4@1642 | 8.72E-11 | 0.003095 |
| 12Oct2011 | 5679 | 1345.63 | -24.7692 | 2 _QVREMH Splice@chr   | 5.02E-12 | 3.38E-04 |
| 12Oct2011 | 3561 | 673.33  | 11.76686 | 2 R.QEM+15 chr3@1026   | 3.68E-10 | 0.009187 |
| 12Oct2011 | 3620 | 868.42  | -0.63154 | 1 K.SSSGSLSS chr2@1132 | 2.52E-10 | 0.006009 |
| 12Oct2011 | 5195 | 573.3   | 15.53336 | 2 K.NIKVGDC chr2@1306  | 4.93E-11 | 0.001032 |
| 12Oct2011 | 3861 | 559.79  | 11.35993 | 2 R.DGWSIGI chr4@4255  | 5.36E-11 | 0.001032 |
| 12Oct2011 | 5267 | 565.83  | 14.11658 | 2 R.ISLTNANI chr5@7795 | 1.47E-10 | 0.003112 |
| 12Oct2011 | 5227 | 565.83  | 14.11658 | 2 R.ISLTNANI chr5@7795 | 2.57E-10 | 0.006009 |

|           |       |         |          |                         |          |          |
|-----------|-------|---------|----------|-------------------------|----------|----------|
| 12Oct2011 | 3654  | 868.42  | -0.63154 | 1 K.SSSGSLSS chr2@1132  | 2.93E-10 | 0.007553 |
| 12Oct2011 | 4382  | 560.82  | 28.56613 | 2 R.PDFSLNS. chr3@3320  | 2.56E-10 | 0.006009 |
| 12Oct2011 | 6313  | 749.39  | -17.0141 | 2 _._RLLQHAN Splice@chr | 2.02E-10 | 0.004225 |
| 12Oct2011 | 1163  | 401.74  | 27.30093 | 2 R.IEAGGGG chr5@8776   | 7.50E-12 | 2.91E-04 |
| 12Oct2011 | 2190  | 604.31  | 24.98924 | 2 K.ERDRYSP chr5@7314   | 1.79E-10 | 0.004003 |
| 12Oct2011 | 4118  | 559.79  | 11.35993 | 2 R.DGWSIG chr4@4253    | 2.17E-10 | 0.004655 |
| 12Oct2011 | 3904  | 559.79  | 11.35993 | 2 R.DGWSIG chr4@4253    | 2.28E-11 | 5.34E-04 |
| 12Oct2011 | 69    | 722.35  | 3.723    | 1 R.FQGGGEI chr1@2595   | 3.33E-10 | 0.009555 |
| 12Oct2011 | 8629  | 515.29  | -6.17134 | 3 K.PNFTVILS chr4@1642  | 2.13E-10 | 0.00603  |
| 12Oct2011 | 9912  | 1061.57 | -13.5816 | 2 S.FAK+14.0 chr5@2472  | 3.43E-10 | 0.009774 |
| 12Oct2011 | 4151  | 559.79  | 11.35993 | 2 R.DGWSIG chr4@4253    | 2.97E-10 | 0.009157 |
| 12Oct2011 | 4621  | 560.82  | 28.56613 | 2 R.PDFSLNS. chr3@3320  | 7.56E-11 | 0.002371 |
| 12Oct2011 | 2292  | 604.31  | 24.98924 | 2 K.ERDRYSP chr5@7314   | 1.49E-10 | 0.004457 |
| 12Oct2011 | 4191  | 559.79  | 11.35993 | 2 R.DGWSIG chr4@4253    | 1.69E-10 | 0.004885 |
| 12Oct2011 | 3978  | 559.79  | 11.35993 | 2 R.DGWSIG chr4@4253    | 5.26E-11 | 0.001615 |
| 12Oct2011 | 6368  | 749.39  | -17.0141 | 2 _._RLLQHAN Splice@chr | 9.37E-12 | 5.82E-04 |
| 12Oct2011 | 5712  | 635.82  | -23.8438 | 2 R.FSWFAQI chr5@1137   | 6.97E-11 | 0.002115 |
| 12Oct2011 | 6074  | 1345.63 | -24.7692 | 2 _._QVREMH Splice@chr  | 5.62E-12 | 3.13E-04 |
| 12Oct2011 | 4566  | 560.82  | 28.56613 | 2 R.PDFSLNS. chr3@3320  | 6.19E-11 | 0.001865 |
| 12Oct2011 | 3705  | 673.33  | 11.76686 | 2 R.QEM+15. chr3@1026   | 1.33E-10 | 0.004    |
| 12Oct2011 | 5970  | 1345.63 | -2.45116 | 2 _._QVREMH Splice@chr  | 5.28E-11 | 0.001615 |
| 12Oct2011 | 4523  | 560.82  | 28.56613 | 2 R.PDFSLNS. chr3@3320  | 2.54E-10 | 0.007376 |
| 12Oct2011 | 70    | 722.35  | 3.723    | 1 R.FQGGGEI chr1@2595   | 3.33E-10 | 0.008181 |
| 12Oct2011 | 4987  | 559.79  | 11.35993 | 2 R.DGWSIG chr4@4253    | 2.95E-11 | 9.95E-04 |
| 12Oct2011 | 5120  | 566.31  | 21.45326 | 2 R.EVAQLEC chr5@1706   | 2.11E-10 | 0.004578 |
| 12Oct2011 | 2423  | 971.56  | 2.079638 | 1 R.NGQLNRI Splice@chr  | 1.98E-10 | 0.004246 |
| 12Oct2011 | 4736  | 752.88  | -14.2545 | 2 R.GKCNGG. chr4@5126   | 4.35E-10 | 0.009903 |
| 12Oct2011 | 1413  | 409.74  | -10.6768 | 2 K.MVITNLK Splice@chr  | 2.70E-10 | 0.006037 |
| 12Oct2011 | 5255  | 560.82  | 28.56613 | 2 R.PDFSLNS. chr3@3320  | 9.18E-11 | 0.002236 |
| 12Oct2011 | 6801  | 635.82  | -23.8438 | 2 R.FSWFAQI chr5@1137   | 2.22E-10 | 0.004731 |
| 12Oct2011 | 7360  | 724.9   | -9.19028 | 2 R.LTFTLTRF chr3@8571  | 3.30E-10 | 0.008014 |
| 12Oct2011 | 6305  | 565.83  | 14.11658 | 2 R.ISLTNANI chr5@7793  | 3.06E-10 | 0.007367 |
| 12Oct2011 | 4774  | 559.79  | 11.35993 | 2 R.DGWSIG chr4@4253    | 2.55E-10 | 0.005885 |
| 12Oct2011 | 7093  | 1345.63 | -24.7692 | 2 _._QVREMH Splice@chr  | 2.71E-10 | 0.006037 |
| 12Oct2011 | 10655 | 916.46  | 1.168576 | 2 G.TEVFGK+ chr1@2717   | 3.40E-10 | 0.008332 |
| 12Oct2011 | 890   | 632.78  | -25.4076 | 2 _._KM+15.9 Splice@chr | 4.44E-11 | 0.001347 |
| 12Oct2011 | 7266  | 724.9   | -9.19028 | 2 R.LTFTLTRF chr3@8571  | 2.11E-10 | 0.004578 |
| 12Oct2011 | 6218  | 565.83  | 14.11658 | 2 R.ISLTNANI chr5@7793  | 2.44E-10 | 0.00541  |
| 12Oct2011 | 7050  | 1345.13 | -23.5213 | 2 _._QVREMH Splice@chr  | 3.06E-10 | 0.007367 |
| 12Oct2011 | 6258  | 565.83  | 14.11658 | 2 R.ISLTNANI chr5@7793  | 2.19E-10 | 0.004731 |
| 12Oct2011 | 4735  | 559.79  | 11.35993 | 2 R.DGWSIG chr4@4253    | 1.90E-10 | 0.003903 |
| 12Oct2011 | 7134  | 1345.63 | -24.7692 | 2 _._QVREMH Splice@chr  | 1.39E-11 | 6.29E-04 |
| 12Oct2011 | 487   | 702.38  | 2.001521 | 1 _._DAAGLAC chr3@2528  | 3.90E-10 | 0.008954 |
| 12Oct2011 | 4901  | 559.79  | 11.35993 | 2 R.DGWSIG chr4@4253    | 2.19E-10 | 0.004731 |
| 12Oct2011 | 3426  | 519.6   | -26.5197 | 3 K.IGSM+15 chr5@1654   | 1.66E-12 | 0        |
| 12Oct2011 | 2453  | 971.56  | 13.66301 | 1 _._DSPIIRNR chr2@3547 | 3.10E-10 | 0.005703 |
| 12Oct2011 | 8530  | 893.92  | 26.65922 | 2 _._FSDDDVT Splice@chr | 3.23E-10 | 0.006016 |

|           |       |         |          |                         |          |          |
|-----------|-------|---------|----------|-------------------------|----------|----------|
| 12Oct2011 | 2415  | 971.56  | 2.079638 | 1 R.NGQLNRI chr4@6924   | 4.44E-10 | 0.008759 |
| 12Oct2011 | 10022 | 1049.52 | 5.532542 | 3 G.DQSVDS chr4@9163    | 4.54E-10 | 0.00907  |
| 12Oct2011 | 6286  | 565.83  | 14.11658 | 2 R.ISLTNANI chr5@7793  | 2.40E-10 | 0.004215 |
| 12Oct2011 | 5056  | 559.79  | 11.35993 | 2 R.DGWSIG chr4@4253    | 1.45E-10 | 0.002351 |
| 12Oct2011 | 108   | 722.35  | 3.723    | 1 R.FQGGGEI chr1@2595   | 3.33E-10 | 0.006016 |
| 12Oct2011 | 7381  | 472.29  | -0.64754 | 2 _SPLFVPKI chrX@4402   | 1.35E-10 | 0.002351 |
| 12Oct2011 | 4834  | 678.83  | -9.90496 | 2 K.M+15.99 chr1@1451   | 1.60E-10 | 0.003052 |
| 12Oct2011 | 5170  | 566.31  | 21.45326 | 2 R.EVAQLEC chr5@1706   | 2.71E-10 | 0.0054   |
| 12Oct2011 | 554   | 702.38  | 2.001521 | 1 _DAAGLAC chr3@2528    | 7.86E-11 | 0.001321 |
| 12Oct2011 | 4641  | 868.42  | -0.63154 | 1 K.SSSGSLSS chr2@1132  | 1.83E-10 | 0.00338  |
| 12Oct2011 | 10187 | 515.29  | -6.17134 | 3 K.PNFTVILS chr4@1642  | 4.44E-10 | 0.008759 |
| 12Oct2011 | 7289  | 724.89  | -23.0179 | 2 R.LTFTLTRF chr3@8571  | 1.49E-10 | 0.002351 |
| 12Oct2011 | 6241  | 565.83  | 14.11658 | 2 R.ISLTNANI chr5@7793  | 1.22E-10 | 0.002201 |
| 12Oct2011 | 520   | 702.38  | 2.001521 | 1 _DAAGLAC chr3@2528    | 1.30E-11 | 8.00E-04 |
| 12Oct2011 | 4959  | 739.4   | 18.15789 | 2 K.M+15.99 chr5@5476   | 4.42E-10 | 0.008759 |
| 12Oct2011 | 4880  | 559.79  | 11.35993 | 2 R.DGWSIG chr4@4253    | 1.29E-10 | 0.002351 |
| 12Oct2011 | 7233  | 1345.63 | -24.7692 | 2 _QVREMH Splice@chr    | 1.28E-10 | 0.002351 |
| 12Oct2011 | 3370  | 1106.56 | -18.6599 | 1 _SSLDKESC chr5@1239   | 1.01E-10 | 0.001667 |
| 12Oct2011 | 698   | 632.78  | -25.4076 | 2 _KM+15.9 Splice@chr   | 3.00E-10 | 0.004293 |
| 12Oct2011 | 5209  | 673.32  | -23.1345 | 4 _QVREMH Splice@chr    | 2.05E-10 | 0.003215 |
| 12Oct2011 | 5160  | 1345.63 | -24.7692 | 2 _QVREMH Splice@chr    | 7.61E-11 | 7.93E-04 |
| 12Oct2011 | 7691  | 1090.53 | -18.1295 | 2 K.INGVTVA chr3@6296   | 6.68E-10 | 0.009977 |
| 12Oct2011 | 5292  | 1345.63 | -24.7692 | 2 _QVREMH Splice@chr    | 2.37E-10 | 0.003691 |
| 12Oct2011 | 10506 | 792.15  | -18.5783 | 4 K.SGTIFDNI Splice@chr | 2.71E-13 | 2.95E-04 |
| 12Oct2011 | 10523 | 791.9   | -17.5179 | 4 K.SGTIFDNI Splice@chr | 1.28E-13 | 0        |
| 12Oct2011 | 48    | 722.35  | 3.723    | 1 R.FQGGGEI chr1@2595   | 3.33E-10 | 0.004293 |
| 12Oct2011 | 5246  | 1345.63 | -24.7692 | 2 _QVREMH Splice@chr    | 3.47E-10 | 0.004293 |
| 12Oct2011 | 5247  | 1345.13 | -23.5213 | 2 _QVREMH Splice@chr    | 3.37E-10 | 0.004293 |
| 12Oct2011 | 3523  | 739.4   | 18.15789 | 2 K.M+15.99 chr5@5476   | 4.37E-10 | 0.006078 |
| 12Oct2011 | 5202  | 1345.63 | -24.7692 | 2 _QVREMH Splice@chr    | 1.55E-10 | 0.002515 |
| 12Oct2011 | 5195  | 897.42  | -27.6753 | 3 _QVREMH Splice@chr    | 3.34E-10 | 0.004293 |
| 12Oct2011 | 9488  | 665.37  | -26.6417 | 2 Q.INNK+14 Splice@chr  | 6.12E-10 | 0.008896 |
| 12Oct2011 | 5118  | 1345.63 | -24.7692 | 2 _QVREMH Splice@chr    | 6.79E-10 | 0.009977 |
| 12Oct2011 | 71    | 722.35  | 3.723    | 1 R.FQGGGEI chr1@2595   | 3.33E-10 | 0.006933 |
| 12Oct2011 | 7944  | 1049.52 | 5.532542 | 3 G.DQSVDS chr4@9163    | 3.38E-10 | 0.007188 |
| 12Oct2011 | 9437  | 809.11  | 19.47063 | 3 _AKNATKY chr1@3095    | 2.53E-10 | 0.004893 |
| 12Oct2011 | 5562  | 1345.63 | -24.7692 | 2 _QVREMH Splice@chr    | 4.55E-10 | 0.009645 |
| 12Oct2011 | 8810  | 1144.09 | 21.82295 | 2 K.NSRFLSK chr1@8068   | 2.47E-10 | 0.004893 |
| 12Oct2011 | 5490  | 1345.63 | -24.7692 | 2 _QVREMH Splice@chr    | 8.87E-12 | 3.27E-04 |
| 12Oct2011 | 10807 | 792.15  | -18.5783 | 4 K.SGTIFDNI Splice@chr | 2.26E-11 | 6.12E-04 |
| 12Oct2011 | 3703  | 1025.62 | -1.90621 | 1 K.LGLGSGL chr5@4945   | 1.99E-10 | 0.004137 |
| 12Oct2011 | 6801  | 1289.21 | -12.1094 | 2 K.TKKQKKK chrX@6244   | 3.81E-10 | 0.008703 |
| 12Oct2011 | 672   | 632.78  | -25.4076 | 2 _KM+15.9 Splice@chr   | 2.04E-10 | 0.003229 |
| 12Oct2011 | 8979  | 853.45  | -23.3178 | 2 K.NFKINSK chr4@5819   | 8.80E-11 | 0.002007 |
| 12Oct2011 | 395   | 702.38  | 2.001521 | 1 _DAAGLAC chr3@2528    | 3.97E-10 | 0.008488 |
| 12Oct2011 | 7621  | 1049.52 | 5.532542 | 3 G.DQSVDS chr4@9163    | 4.48E-12 | 0        |
| 12Oct2011 | 9967  | 1003.2  | 27.12227 | 3 R.CWNRRA Splice@chr   | 6.62E-11 | 0.00174  |

|           |       |         |          |                         |          |          |
|-----------|-------|---------|----------|-------------------------|----------|----------|
| 12Oct2011 | 1276  | 947.5   | 21.47418 | 1 R.DLTNDITl Splice@chr | 3.06E-10 | 0.006024 |
| 12Oct2011 | 5299  | 1345.13 | -23.5213 | 2 _QVREMH Splice@chr    | 7.86E-11 | 0.002007 |
| 12Oct2011 | 2035  | 604.31  | 24.98924 | 2 K.ERDRYSP chr5@7314   | 7.52E-11 | 0.002007 |
| 12Oct2011 | 7035  | 687.41  | 21.43028 | 2 E.M+15.99 chr2@8546   | 1.32E-10 | 0.002201 |
| 12Oct2011 | 7860  | 1090.54 | -8.93818 | 2 K.INGVTVA chr3@6296   | 3.16E-10 | 0.006536 |
| 12Oct2011 | 5467  | 1345.63 | -24.7692 | 2 _QVREMH Splice@chr    | 2.84E-10 | 0.008751 |
| 12Oct2011 | 7949  | 515.29  | -6.17134 | 3 K.PNFTVILS chr4@1642  | 3.56E-10 | 0.009942 |
| 12Oct2011 | 3932  | 559.79  | 11.35993 | 2 R.DGWSIGl chr4@4255   | 6.93E-11 | 0.002001 |
| 12Oct2011 | 7892  | 1090.54 | -8.93818 | 2 K.INGVTVA chr3@6296   | 1.43E-10 | 0.003901 |
| 12Oct2011 | 7907  | 515.29  | -6.17134 | 3 K.PNFTVILS chr4@1642  | 9.04E-11 | 0.002001 |
| 12Oct2011 | 7690  | 1049.52 | 5.532542 | 3 G.DQSVDSl chr4@9165   | 2.38E-10 | 0.005943 |
| 12Oct2011 | 9511  | 665.37  | -26.6417 | 2 Q.INNK+14 Splice@chr  | 3.43E-10 | 0.009699 |
| 12Oct2011 | 8828  | 853.45  | -23.3178 | 2 K.NFKINSKI chr4@5819  | 2.16E-10 | 0.005429 |
| 12Oct2011 | 3425  | 696.37  | -15.3603 | 2 _LPTSPIGL chr5@1204   | 1.92E-10 | 0.004665 |
| 12Oct2011 | 8764  | 894     | -12.2343 | 2 _VETGIKP Splice@chr   | 2.43E-10 | 0.005689 |
| 12Oct2011 | 8767  | 990.5   | -11.7554 | 2 F.RLSESELE chr4@7519  | 8.94E-11 | 0.001126 |
| 12Oct2011 | 3910  | 752.88  | -14.2545 | 2 R.GKCNGG chr4@5126    | 2.22E-10 | 0.005094 |
| 12Oct2011 | 3909  | 1025.62 | -1.90621 | 1 K.LGLGSGL chr5@4945   | 1.20E-10 | 0.001987 |
| 12Oct2011 | 5991  | 1345.63 | -24.7692 | 2 _QVREMH Splice@chr    | 1.16E-10 | 0.001987 |
| 12Oct2011 | 5997  | 1345.13 | -23.5213 | 2 _QVREMH Splice@chr    | 1.53E-10 | 0.002606 |
| 12Oct2011 | 4253  | 566.31  | 21.45326 | 2 R.EVAQLEC chr5@1706   | 1.68E-10 | 0.00281  |
| 12Oct2011 | 6123  | 897.42  | -27.6753 | 3 _QVREMH Splice@chr    | 3.21E-10 | 0.006792 |
| 12Oct2011 | 4514  | 560.82  | 28.56613 | 2 R.PDFSLNS chr3@3320   | 3.99E-10 | 0.009135 |
| 12Oct2011 | 3146  | 693.87  | -6.6949  | 2 V.ICVAVGD chr5@1065   | 1.83E-10 | 0.003655 |
| 12Oct2011 | 10056 | 853.45  | -23.3178 | 2 K.NFKINSKI chr4@5819  | 4.16E-10 | 0.009135 |
| 12Oct2011 | 8809  | 894     | -12.2343 | 2 _VETGIKP Splice@chr   | 5.08E-11 | 6.83E-04 |
| 12Oct2011 | 3714  | 868.43  | 10.92162 | 1 K.SSSGSLSS chr2@1132  | 3.02E-10 | 0.006632 |
| 12Oct2011 | 6131  | 1345.63 | -24.7692 | 2 _QVREMH Splice@chr    | 3.72E-10 | 0.007758 |
| 12Oct2011 | 8928  | 894     | -12.2343 | 2 _VETGIKP Splice@chr   | 9.24E-12 | 0        |
| 12Oct2011 | 4426  | 566.31  | 21.45326 | 2 R.EVAQLEC chr5@1706   | 6.94E-11 | 0.001979 |
| 12Oct2011 | 8979  | 894     | -12.2343 | 2 _VETGIKP Splice@chr   | 1.83E-10 | 0.005442 |
| 12Oct2011 | 1331  | 439.74  | 18.7116  | 2 R.SIAMFGP chr2@4157   | 2.02E-11 | 5.38E-04 |
| 12Oct2011 | 6119  | 1345.63 | -24.7692 | 2 _QVREMH Splice@chr    | 3.40E-10 | 0.009651 |
| 12Oct2011 | 10117 | 1144.53 | -24.5349 | 2 _YYHFTLDl chr5@8295   | 2.91E-10 | 0.008454 |
| 12Oct2011 | 4122  | 1025.62 | -1.90621 | 1 K.LGLGSGL chr5@4945   | 1.59E-10 | 0.005343 |
| 12Oct2011 | 2301  | 876.41  | -8.50606 | 1 K.TEDEARR chrX@1138   | 4.26E-11 | 0.001256 |
| 12Oct2011 | 8880  | 894     | -12.2343 | 2 _VETGIKP Splice@chr   | 2.26E-10 | 0.005442 |
| 12Oct2011 | 3324  | 693.87  | -6.6949  | 2 V.ICVAVGD chr5@1065   | 1.43E-10 | 0.004685 |
| 12Oct2011 | 8984  | 1090.53 | -18.1295 | 2 K.INGVTVA chr3@6296   | 2.28E-10 | 0.005442 |
| 12Oct2011 | 1368  | 439.74  | 18.7116  | 2 R.SIAMFGP chr2@4157   | 7.47E-11 | 0.002668 |
| 12Oct2011 | 1365  | 440.24  | 14.88826 | 2 R.SIAMFGP chr2@4157   | 3.66E-10 | 0.00984  |
| 12Oct2011 | 6080  | 1345.13 | -23.5213 | 2 _QVREMH Splice@chr    | 4.04E-11 | 0.001256 |
| 12Oct2011 | 4081  | 1025.61 | -11.6755 | 1 K.LGLGSGL chr5@4945   | 3.12E-10 | 0.009085 |
| 12Oct2011 | 65    | 722.35  | 3.723    | 1 R.FQGGGEI chr1@2595   | 3.33E-10 | 0.009484 |
| 12Oct2011 | 5548  | 897.42  | -27.6753 | 3 _QVREMH Splice@chr    | 2.45E-10 | 0.005805 |
| 12Oct2011 | 5077  | 461.25  | 17.32781 | 2 _YEPAAlEk chrX@8729   | 1.10E-10 | 0.00335  |
| 12Oct2011 | 5681  | 461.25  | 17.32781 | 2 _YEPAAlEk chrX@8729   | 7.72E-11 | 0.002589 |

|           |       |         |          |                          |          |          |
|-----------|-------|---------|----------|--------------------------|----------|----------|
| 12Oct2011 | 4966  | 461.25  | 17.32781 | 2 _ .YEPAAIK chrX@8729   | 5.13E-12 | 0        |
| 11Nov2011 | 14747 | 953.49  | 18.26316 | 1 K.MTTSSLT chrX@7280    | 3.50E-10 | 0.006258 |
| 11Nov2011 | 13832 | 953.48  | 7.753834 | 1 K.MTTSSLT chrX@7280    | 3.95E-10 | 0.007842 |
| 11Nov2011 | 35087 | 773.4   | 12.2484  | 1 R.RPSGDN chr4@9408     | 1.37E-10 | 0.002935 |
| 12Oct2011 | 1044  | 746.4   | -18.2295 | 2 K.FFPPKKF chr5@1869    | 5.06E-11 | 0.001453 |
| 12Oct2011 | 767   | 432.25  | 16.43975 | 2 K.KLSANSSI chrX@8646   | 3.26E-10 | 0.009377 |
| 12Oct2011 | 13902 | 1067.56 | -22.089  | 2 R.RVERREK chr1@7259    | 1.13E-10 | 0.002726 |
| 11Nov2011 | 12050 | 930.55  | -18.6893 | 2 _ .RTK+14.0 chr2@2629  | 2.92E-10 | 0.005733 |
| 11Nov2011 | 237   | 465.29  | 2.150296 | 3 K.K+14.016 chr1@8031   | 2.12E-10 | 0.006312 |
| 11Nov2011 | 16568 | 885.52  | -24.9574 | 2 K.LK+14.01 Splice@chr  | 2.94E-11 | 0.001024 |
| 11Nov2011 | 7799  | 473.29  | 10.56326 | 3 K.KM+15.9 chr4@5665    | 2.58E-10 | 0.004958 |
| 11Nov2011 | 6311  | 956.42  | -17.456  | 1 R.QSSTSSG chr5@1425    | 1.19E-10 | 0.002789 |
| 11Nov2011 | 31830 | 993.71  | -14.0672 | 4 R.HYFSCSFI chr5@1736   | 6.51E-11 | 0.002101 |
| 12Oct2011 | 9422  | 792.93  | 7.597834 | 2 R.FLQM+15 Splice@chr   | 4.17E-10 | 0.009424 |
| 11Nov2011 | 21914 | 782.38  | -21.3243 | 2 R.EHRWRSI Splice@chr   | 6.16E-10 | 0.00985  |
| 11Nov2011 | 18700 | 782.39  | -8.51411 | 2 R.EHRWRSI Splice@chr   | 1.58E-10 | 0.00443  |
| 11Nov2011 | 22951 | 1069.53 | -0.60929 | 3 K.M+15.99 chrX@2877    | 4.17E-10 | 0.007439 |
| 11Nov2011 | 16439 | 1114.57 | 4.665064 | 1 _ .SFSKITEC Splice@chr | 5.31E-10 | 0.00985  |
| 11Nov2011 | 17037 | 1114.58 | 13.66217 | 1 _ .SFSKITEC Splice@chr | 4.48E-10 | 0.009583 |
| 11Nov2011 | 33230 | 1005.48 | -10.8244 | 1 R.FYSMTSII chr5@1218   | 3.92E-10 | 0.008345 |
| 12Oct2011 | 263   | 531.26  | -14.388  | 2 K.RMRGAD chr4@7697     | 7.74E-11 | 0.002475 |
| 11Nov2011 | 17364 | 850.99  | -14.9074 | 2 L.VLK+14.0 chrX@1119   | 3.48E-10 | 0.006475 |
| 11Nov2011 | 17367 | 850.98  | -26.6906 | 2 L.VLK+14.0 chrX@1119   | 5.68E-10 | 0.009802 |
| 11Nov2011 | 5745  | 520.28  | -8.46279 | 2 K.M+15.99 chrX@7736    | 3.36E-11 | 9.19E-04 |
| 12Oct2011 | 13925 | 808.92  | -11.7096 | 2 R.FFM+15.9 chr2@1112   | 4.21E-10 | 0.009583 |
| 11Nov2011 | 11412 | 595.35  | 9.653295 | 2 K.IKNFNAQ chrX@1616    | 2.82E-10 | 0.005741 |
| 11Nov2011 | 24109 | 1092.55 | 5.703509 | 1 K.NLSENVN chr4@1314    | 5.75E-11 | 0.001856 |
| 11Nov2011 | 26562 | 1057.56 | -27.2489 | 2 _ .RMNKLLL Splice@chr  | 9.34E-11 | 0.002154 |
| 12Oct2011 | 6145  | 864.42  | -26.9822 | 2 R.HVHCIYT chr5@8534    | 1.91E-11 | 8.00E-04 |
| 11Nov2011 | 3529  | 834.4   | 20.82739 | 1 R.HSNLFDI Splice@chr   | 4.84E-10 | 0.007872 |
| 12Oct2011 | 6449  | 853.94  | 10.734   | 2 R.FLVM+15 Splice@chr   | 2.27E-10 | 0.007212 |
| 12Oct2011 | 2910  | 557.83  | -5.59025 | 2 K.KSGQQIN chr4@5114    | 3.58E-10 | 0.009187 |
| 11Nov2011 | 30764 | 1216.14 | 6.759551 | 2 K.SCSPTITII chr5@9092  | 6.87E-11 | 0.001712 |
| 11Nov2011 | 8318  | 578.33  | -12.7983 | 3 K.VDTTEIGI chrX@1288   | 8.89E-11 | 0.002402 |
| 11Nov2011 | 2730  | 801.38  | -22.0632 | 1 R.FGSFASG chr1@1125    | 5.61E-10 | 0.009257 |
| 11Nov2011 | 2965  | 801.38  | -22.0632 | 1 R.FGSFASG chr1@1125    | 1.62E-10 | 0.003635 |
| 11Nov2011 | 2915  | 801.38  | -22.0632 | 1 R.FGSFASG chr1@1125    | 1.86E-10 | 0.004156 |
| 11Nov2011 | 3012  | 801.38  | -22.0632 | 1 R.FGSFASG chr1@1125    | 6.88E-11 | 0.002052 |
| 11Nov2011 | 2961  | 801.38  | -22.0632 | 1 R.FGSFASG chr1@1125    | 1.53E-10 | 0.004064 |
| 11Nov2011 | 2780  | 801.38  | -22.0632 | 1 R.FGSFASG chr1@1125    | 1.70E-10 | 0.003765 |
| 11Nov2011 | 2841  | 801.38  | -22.0632 | 1 R.FGSFASG chr1@1125    | 7.76E-11 | 0.001841 |
| 11Nov2011 | 30098 | 1166.03 | 0.209559 | 2 R.VDLAHVI chr5@6435    | 1.78E-10 | 0.003894 |
| 11Nov2011 | 30296 | 1166.53 | -1.23024 | 2 R.VDLAHVI chr5@6435    | 5.39E-10 | 0.0094   |
| 11Nov2011 | 12804 | 884.51  | 0.828999 | 1 K.SPTLSIPG chr3@7060   | 1.11E-10 | 0.002698 |
| 11Nov2011 | 14338 | 662.36  | 27.36381 | 3 _ .EDDNIIFF chr1@1230  | 5.16E-10 | 0.009776 |
| 11Nov2011 | 13276 | 571.32  | -26.255  | 3 K.KSIIVTKIE chr3@1161  | 2.12E-10 | 0.005786 |
| 11Nov2011 | 1039  | 545.31  | -1.401   | 2 K.SLGLFDIP chr4@1261   | 4.48E-10 | 0.008839 |

|           |       |         |          |                         |          |          |
|-----------|-------|---------|----------|-------------------------|----------|----------|
| 12Oct2011 | 1263  | 589.84  | -6.68955 | 2 R.KNMSPF/ chrX@399    | 2.75E-11 | 0.001843 |
| 12Oct2011 | 3038  | 984.53  | 14.06454 | 2 R.NFRRAKS chrX@1611   | 2.86E-11 | 6.12E-04 |
| 12Oct2011 | 8570  | 883.5   | -0.62246 | 2 R.TK+14.01 chrX@1110  | 2.52E-10 | 0.005303 |
| 11Nov2011 | 3033  | 735.33  | -27.5112 | 2 K.YGHANVI chr1@1065   | 4.12E-10 | 0.009024 |
| 11Nov2011 | 37096 | 1231.64 | -23.2937 | 2 K.TITLEVEA Splice@chr | 3.02E-10 | 0.005995 |
| 11Nov2011 | 28249 | 501.25  | -28.0008 | 2 R.CALAPSL chr1@2970   | 5.20E-10 | 0.009653 |
| 12Oct2011 | 11630 | 1065.08 | 4.620687 | 2 R.RHCFYLK Splice@chr  | 1.65E-10 | 0.003804 |
| 12Oct2011 | 10332 | 745.08  | -17.6975 | 3 _SLK+14.0 chr5@1760   | 9.81E-11 | 0.002796 |
| 12Oct2011 | 10365 | 745.08  | -17.6975 | 3 _SLK+14.0 chr5@1760   | 2.32E-10 | 0.005272 |
| 11Nov2011 | 30699 | 898.8   | -27.27   | 3 D.VDDDLIS chr5@1374   | 5.97E-10 | 0.009662 |
| 11Nov2011 | 27748 | 914.49  | -26.7057 | 2 K.NRFK+14 Splice@chr  | 2.51E-10 | 0.00477  |
| 11Nov2011 | 31107 | 1232.65 | -24.8765 | 2 R.RGKMK+ Splice@chr   | 2.28E-10 | 0.004312 |
| 11Nov2011 | 30996 | 1233.15 | -26.2383 | 2 R.RGKMK+ Splice@chr   | 9.33E-11 | 0.002188 |
| 11Nov2011 | 1581  | 593.34  | 6.491695 | 2 R.WFLHREI chr4@1342   | 3.99E-10 | 0.00885  |
| 12Oct2011 | 9793  | 995.48  | -2.67005 | 2 L.CQLDDEF chr1@1291   | 5.82E-10 | 0.008708 |
| 11Nov2011 | 26877 | 785.91  | -14.0746 | 2 R.FQTPQPL chrX@1230   | 4.30E-10 | 0.008569 |
| 11Nov2011 | 32680 | 829.5   | -10.7662 | 1 R.AGVIQGF chr1@7082   | 7.93E-11 | 0.001916 |
| 11Nov2011 | 29389 | 1133.61 | -19.9386 | 2 K.SANFRKS chr5@5117   | 4.02E-10 | 0.008627 |
| 11Nov2011 | 7842  | 1157.62 | -13.8257 | 1 K.YINFNVFI chr4@1622  | 1.90E-10 | 0.003774 |
| 11Nov2011 | 3574  | 451.27  | 19.3847  | 2 R.KTPIWEK chr2@6948   | 2.42E-10 | 0.00512  |
| 11Nov2011 | 13020 | 915.49  | 10.62623 | 1 K.MGLSHEI chr4@9636   | 1.75E-10 | 0.004758 |
| 11Nov2011 | 27253 | 959.84  | 1.380437 | 3 K.GICDLSKI chrX@1654  | 2.71E-10 | 0.004981 |
| 11Nov2011 | 33774 | 1177.6  | 10.92528 | 2 R.KFKGSM chr4@8234    | 6.20E-10 | 0.00985  |
| 11Nov2011 | 11547 | 606.33  | 28.03177 | 3 R.VDNSFEII chr4@4937  | 2.99E-10 | 0.005688 |
| 11Nov2011 | 32739 | 1068.08 | 5.408856 | 2 K.IPQIDFV chr1@9647   | 4.48E-10 | 0.009589 |
| 11Nov2011 | 19455 | 916.53  | 4.866717 | 1 K.FPGDVLL chr1@1206   | 1.35E-10 | 0.003291 |
| 12Oct2011 | 1877  | 946.5   | 4.583344 | 1 K.DSQLNLT chr3@6013   | 2.22E-10 | 0.004731 |
| 12Oct2011 | 3609  | 562.28  | 19.35686 | 2 K.SISIECTI Splice@chr | 3.64E-10 | 0.007758 |
| 11Nov2011 | 21122 | 966.02  | -25.279  | 2 K.IYCIFFIQS chr2@9917 | 4.76E-10 | 0.009084 |
| 11Nov2011 | 5275  | 960.54  | -8.14192 | 1 K.ETDRALK chr4@1487   | 3.42E-10 | 0.005195 |
| 12Oct2011 | 4691  | 793.9   | -14.5486 | 2 K.KNPQFNI chrX@8820   | 1.87E-10 | 0.005828 |
| 12Oct2011 | 9274  | 768.74  | 26.07687 | 3 _VLDQCLN Splice@chr   | 3.00E-10 | 0.006171 |
| 11Nov2011 | 21857 | 883.99  | 9.746563 | 2 R.FLM+15.9 chrX@2252  | 5.47E-10 | 0.008192 |
| 11Nov2011 | 23182 | 950.52  | 8.008353 | 2 R.KKFWAA chrX@2610    | 3.53E-10 | 0.006624 |
| 12Oct2011 | 1109  | 1168    | -16.3177 | 2 K.KFQIFFV chr5@2009   | 4.14E-10 | 0.009263 |
| 11Nov2011 | 28451 | 801.91  | -7.92557 | 2 K.SMRKRGi chrX@1522   | 5.56E-10 | 0.00964  |
| 11Nov2011 | 17923 | 883.99  | -2.14284 | 2 R.M+15.99 chr5@1120   | 9.43E-11 | 0.002043 |
| 11Nov2011 | 18805 | 561.29  | -25.3228 | 3 R.FLSRNGN chr4@1073   | 3.63E-10 | 0.006833 |
| 11Nov2011 | 17206 | 836.43  | -1.42422 | 2 K.NM+15.9 chr4@1218   | 3.67E-10 | 0.007059 |
| 11Nov2011 | 17984 | 998.97  | 12.75947 | 2 R.NFFGMQ Splice@chr   | 3.04E-10 | 0.005393 |
| 11Nov2011 | 9397  | 489.77  | -20.9358 | 2 R.LSRGSKS chr4@1306   | 1.97E-10 | 0.004193 |
| 11Nov2011 | 11527 | 468.28  | 28.44352 | 2 R.GQTFRV chr2@1274    | 1.56E-10 | 0.002881 |
| 12Oct2011 | 4811  | 468.28  | 28.44352 | 2 R.GQTFRV chr2@1274    | 1.22E-10 | 0.003372 |
| 12Oct2011 | 4460  | 468.28  | 28.44352 | 2 R.GQTFRV chr3@8898    | 2.19E-10 | 0.004655 |
| 11Nov2011 | 4101  | 661.37  | -2.12579 | 1 R.NAGISAK chr4@1187   | 5.19E-10 | 0.009653 |
| 11Nov2011 | 22490 | 887     | 28.50378 | 2 K.NHFPLAA Splice@chr  | 1.44E-16 | 0        |
| 12Oct2011 | 10233 | 1090.01 | -28.0226 | 2 R.FFFK+14. chr1@2835  | 6.23E-11 | 0.002602 |

|           |       |         |          |                         |          |          |
|-----------|-------|---------|----------|-------------------------|----------|----------|
| 12Oct2011 | 9249  | 731.91  | 5.809198 | 2 R.KIFFMKM chr3@7469   | 2.15E-10 | 0.005429 |
| 12Oct2011 | 9647  | 731.91  | 5.809198 | 2 R.KIFFMKM chr3@7469   | 1.12E-10 | 0.002503 |
| 11Nov2011 | 19664 | 683.38  | -20.2143 | 3 K.KFPISKKN Splice@chr | 2.66E-10 | 0.005877 |
| 11Nov2011 | 19359 | 683.38  | -20.2143 | 3 K.KFPISKKN Splice@chr | 2.81E-10 | 0.005036 |
| 11Nov2011 | 8417  | 794.94  | -29.1142 | 2 K.FLEKFTK+ chr2@4592  | 3.36E-10 | 0.006771 |
| 12Oct2011 | 89    | 499.91  | -18.8102 | 3 R.PSPPM+1 chr2@1176   | 3.40E-10 | 0.009005 |
| 11Nov2011 | 4400  | 461.74  | 0.731734 | 2 K.NSEIFPSK chr5@1781  | 1.53E-10 | 0.003438 |
| 11Nov2011 | 15746 | 1055.22 | -20.7517 | 3 K.KLRSACA chrX@9815   | 4.63E-11 | 9.37E-04 |
| 11Nov2011 | 35144 | 1003.6  | -3.53227 | 1 K.AKWRW\ chr2@5877    | 3.78E-10 | 0.007275 |
| 11Nov2011 | 18165 | 640.33  | -16.3065 | 4 K.NYQQCR\ chr2@8725   | 7.38E-11 | 0.001579 |
| 12Oct2011 | 11453 | 737.06  | -3.84283 | 3 K.MCSLIQN chr1@6146   | 2.64E-10 | 0.006012 |
| 11Nov2011 | 26877 | 792.42  | -27.249  | 3 K.SNPAK+ chr1@1150    | 4.38E-10 | 0.007221 |
| 12Oct2011 | 1498  | 468.24  | -13.912  | 2 R.HHFPELR Splice@chr  | 1.73E-10 | 0.004323 |
| 11Nov2011 | 27454 | 763.77  | -28.9249 | 5 K.KHM+15. chr5@4498   | 1.61E-10 | 0.004516 |
| 12Oct2011 | 7437  | 930.5   | -8.05485 | 3 R.LVSHFGV chr5@1297   | 1.72E-10 | 0.004885 |
| 12Oct2011 | 6602  | 930.5   | -8.05485 | 3 R.LVSHFGV chr5@1297   | 2.32E-10 | 0.003744 |
| 11Nov2011 | 3651  | 510.31  | -24.1091 | 2 R.LKMTALT Splice@chr  | 3.11E-11 | 0.001247 |
| 11Nov2011 | 27565 | 1091.55 | 2.4927   | 2 K.LANDSLF. Splice@chr | 4.89E-10 | 0.009744 |
| 11Nov2011 | 21862 | 576.26  | 0.63661  | 2 R.KTDSGSS chr3@3105   | 1.89E-10 | 0.004312 |
| 12Oct2011 | 11043 | 1040.85 | -28.8669 | 3 _APGEK+1 chr2@2231    | 2.77E-10 | 0.008475 |
| 12Oct2011 | 744   | 523.78  | 3.85286  | 2 R.EVEREKE Splice@chr  | 4.05E-10 | 0.009265 |
| 12Oct2011 | 5475  | 876.45  | -18.3102 | 2 K.M+15.99 Splice@chr  | 2.53E-10 | 0.006012 |
| 12Oct2011 | 7550  | 668.35  | -1.55482 | 2 R.TK+14.01 chr4@1051  | 2.59E-10 | 0.005885 |
| 12Oct2011 | 7525  | 668.36  | 13.44461 | 2 R.TK+14.01 chr4@1051  | 6.38E-11 | 0.001321 |
| 11Nov2011 | 28401 | 973.52  | 13.28193 | 2 K.LIFENEQI chr2@8808  | 2.17E-10 | 0.004985 |
| 11Nov2011 | 28253 | 973.52  | 13.28193 | 2 K.LIFENEQI chr2@8808  | 4.88E-10 | 0.008653 |
| 11Nov2011 | 27931 | 973.53  | 23.58007 | 2 K.LIFENEQI chr2@8808  | 2.66E-10 | 0.005451 |
| 11Nov2011 | 11312 | 552.31  | -11.2924 | 2 K.MIGIGGT Splice@chr  | 5.24E-10 | 0.009727 |
| 11Nov2011 | 6201  | 472.29  | 17.31042 | 2 R.IWPKVGS chr4@2660   | 4.34E-10 | 0.009467 |
| 12Oct2011 | 8981  | 1176.57 | -13.7619 | 3 Q.RRNK+14 Splice@chr  | 2.58E-10 | 0.005874 |
| 11Nov2011 | 24207 | 738.95  | 12.87177 | 2 K.NNNFLK+ chr3@1068   | 5.10E-10 | 0.008485 |
| 12Oct2011 | 3154  | 706.4   | -6.92208 | 2 K.LK+14.01 chr1@1334  | 4.38E-11 | 8.91E-04 |
| 12Oct2011 | 3128  | 706.4   | -6.92208 | 2 K.LK+14.01 chr1@1334  | 2.34E-12 | 0        |
| 12Oct2011 | 3303  | 706.4   | -6.92208 | 2 K.LK+14.01 chr1@1334  | 2.18E-10 | 0.005429 |
| 12Oct2011 | 3263  | 706.4   | -6.92208 | 2 K.LK+14.01 chr1@1334  | 6.46E-12 | 3.24E-04 |
| 11Nov2011 | 16302 | 859.91  | -14.1837 | 2 _RDNK+14 chrX@1605    | 2.09E-10 | 0.005919 |
| 11Nov2011 | 33180 | 1220.59 | 13.61269 | 1 R.VAGESCS chrX@1706   | 9.80E-12 | 7.03E-05 |
| 11Nov2011 | 30844 | 1089.65 | 28.18763 | 2 I.KTILPNFRI chr5@7955 | 2.93E-10 | 0.006502 |
| 11Nov2011 | 447   | 474.27  | -3.54807 | 2 _QVGSNSI chr2@6140    | 1.51E-10 | 0.00277  |
| 12Oct2011 | 12260 | 1020.51 | 10.83616 | 1 K.RWMWV chr1@2685     | 4.59E-10 | 0.009766 |
| 11Nov2011 | 29304 | 1091.52 | 0.700922 | 2 H.PTEK+14 chrX@1645   | 3.03E-10 | 0.005432 |
| 11Nov2011 | 32434 | 1094.11 | 18.68726 | 2 R.YSEPDEH chr3@5445   | 5.24E-10 | 0.008742 |
| 11Nov2011 | 18958 | 1280.7  | 5.177823 | 2 _DPMRKL\ Splice@chr   | 3.43E-10 | 0.007556 |
| 11Nov2011 | 17702 | 1280.7  | 5.177823 | 2 _DPMRKL\ Splice@chr   | 2.64E-10 | 0.004917 |
| 12Oct2011 | 8152  | 1280.71 | 13.00294 | 2 _DPMRKL\ Splice@chr   | 3.15E-10 | 0.008642 |
| 12Oct2011 | 7421  | 1280.71 | 13.00294 | 2 _DPMRKL\ Splice@chr   | 1.20E-10 | 0.002201 |
| 11Nov2011 | 13415 | 1149.61 | 25.47818 | 1 K.WGM+15 chrX@7820    | 3.17E-10 | 0.005839 |

|           |       |         |          |                         |          |          |
|-----------|-------|---------|----------|-------------------------|----------|----------|
| 11Nov2011 | 13654 | 1149.61 | 25.47818 | 1 K.WGM+15 chrX@7820    | 1.96E-11 | 2.55E-04 |
| 11Nov2011 | 13445 | 1149.61 | 25.47818 | 1 K.WGM+15 chrX@7820    | 2.82E-10 | 0.005333 |
| 11Nov2011 | 13098 | 1149.61 | 25.47818 | 1 K.WGM+15 chrX@7820    | 4.36E-10 | 0.007612 |
| 11Nov2011 | 13461 | 1149.61 | 25.47818 | 1 K.WGM+15 chrX@7820    | 4.86E-10 | 0.008653 |
| 11Nov2011 | 13405 | 1149.61 | 25.47818 | 1 K.WGM+15 chrX@7820    | 1.18E-10 | 0.003604 |
| 11Nov2011 | 13220 | 1149.61 | 25.47818 | 1 K.WGM+15 chrX@7820    | 4.19E-10 | 0.008137 |
| 11Nov2011 | 13333 | 1149.61 | 25.47818 | 1 K.WGM+15 chrX@7820    | 6.31E-11 | 0.001487 |
| 11Nov2011 | 12270 | 1149.61 | 25.47818 | 1 K.WGM+15 chrX@7820    | 4.18E-10 | 0.008308 |
| 12Oct2011 | 974   | 418.24  | -4.39126 | 2 R.ITFSAAPK Splice@chr | 2.78E-10 | 0.006449 |
| 12Oct2011 | 8119  | 1112.12 | -11.4256 | 2 K.K+14.016 chrX@5639  | 3.55E-10 | 0.008955 |
| 11Nov2011 | 2780  | 423.26  | 23.23042 | 2 R.KLAANAE chr5@1339   | 3.18E-10 | 0.005609 |
| 11Nov2011 | 8137  | 698.36  | 23.80714 | 2 K.M+15.99 chrX@4525   | 7.51E-12 | 2.26E-04 |
| 12Oct2011 | 7411  | 1146.05 | -27.0619 | 2 R.FQDIIFEI chr4@9648  | 1.12E-10 | 0.003537 |
| 11Nov2011 | 5947  | 772.4   | -19.0112 | 1 R.NNGKNP chr1@1290    | 3.82E-10 | 0.006859 |
| 11Nov2011 | 5622  | 474.74  | -11.6054 | 2 K.NEKENSv chrX@6577   | 3.95E-10 | 0.004904 |
| 11Nov2011 | 12457 | 944.52  | -28.62   | 1 R.GGRAGS\ chr2@8457   | 1.58E-10 | 0.002719 |
| 11Nov2011 | 804   | 472.26  | -14.4409 | 2 R.DPIMRRF chrX@1396   | 5.18E-10 | 0.009352 |
| 11Nov2011 | 28137 | 983.51  | 6.967029 | 1 R.YATGKW chr5@1091    | 1.07E-10 | 0.002246 |
| 11Nov2011 | 7402  | 853.41  | 26.06443 | 1 R.DYPTMAI chrX@6964   | 2.40E-10 | 0.003871 |
| 12Oct2011 | 7636  | 930.5   | -8.05485 | 3 R.LVSHFGV chr5@1297   | 4.80E-10 | 0.009945 |
| 12Oct2011 | 7638  | 930.5   | -8.05485 | 3 R.LVSHFGV chr5@1297   | 4.25E-11 | 0.001256 |
| 11Nov2011 | 3375  | 433.22  | 8.414656 | 2 R.SPYGSPTI chr4@2552  | 1.70E-10 | 0.002925 |
| 11Nov2011 | 352   | 479.79  | -15.6161 | 2 _K.MVSPRI chr1@1106   | 2.05E-10 | 0.005143 |
| 11Nov2011 | 1011  | 479.79  | -15.6161 | 2 _K.MVSPRI chr1@1106   | 4.44E-10 | 0.008443 |
| 11Nov2011 | 18747 | 987.02  | -27.2976 | 2 K.IKIKLFQT chr4@5113  | 3.24E-10 | 0.005965 |
| 11Nov2011 | 5161  | 575.31  | -16.3257 | 2 R.SRK+14.0 chr4@1156  | 1.65E-10 | 0.002749 |
| 12Oct2011 | 725   | 833.45  | -18.0365 | 2 R.TRVTVEN chrX@1093   | 4.52E-11 | 6.78E-04 |
| 12Oct2011 | 5714  | 600.38  | -21.6551 | 2 K.RKGNTIK chrX@3536   | 2.32E-10 | 0.006419 |
| 12Oct2011 | 11428 | 990.02  | -8.82492 | 2 K.AVQLEKR chr5@3170   | 3.62E-10 | 0.00984  |
| 11Nov2011 | 36346 | 1027.55 | 6.098408 | 2 R.FRKNQPI chr1@6480   | 1.72E-10 | 0.003789 |
| 11Nov2011 | 31096 | 1017.05 | -17.2777 | 2 R.M+15.99 chr5@2050   | 1.04E-11 | 1.45E-04 |
| 11Nov2011 | 17033 | 705.05  | -18.7042 | 3 K.TLNFAKN chr5@4621   | 3.16E-10 | 0.008159 |
| 12Oct2011 | 1629  | 584.3   | -7.53396 | 2 R.FSLKNTEI chr4@2692  | 2.12E-10 | 0.004522 |
| 11Nov2011 | 27970 | 975.49  | -22.8607 | 2 R.HCIHLRTI Splice@chr | 2.31E-10 | 0.004035 |
| 11Nov2011 | 25567 | 687.38  | -27.9214 | 2 K.NSKVSKN chr3@9741   | 2.37E-10 | 0.005177 |
| 11Nov2011 | 20766 | 713.36  | -28.274  | 2 R.CSSFLVQ chr2@1024   | 3.16E-10 | 0.005913 |
| 11Nov2011 | 29109 | 1039.23 | 10.97391 | 3 K.LCFSQSSI chr2@4162  | 2.53E-10 | 0.006047 |
| 11Nov2011 | 2707  | 830.46  | 24.13643 | 2 K.KKFLEICV chr3@1426  | 4.14E-10 | 0.008772 |
| 11Nov2011 | 28907 | 929.46  | -26.0318 | 2 K.LPELNISG chr3@1071  | 1.57E-10 | 0.004169 |
| 12Oct2011 | 11134 | 749.43  | 28.63925 | 3 K.KFQFFQK chr3@1148   | 1.47E-10 | 0.002396 |
| 12Oct2011 | 6783  | 659.36  | -22.3115 | 3 K.KVYFAGK chrX@5755   | 4.55E-10 | 0.009785 |
| 11Nov2011 | 30385 | 995.06  | -14.9694 | 4 K.KINFFPKI chr3@3248  | 4.05E-10 | 0.007757 |
| 11Nov2011 | 14017 | 801.43  | 2.557449 | 2 V.ENLNFRC chr2@1407   | 5.24E-11 | 0.001472 |
| 11Nov2011 | 13329 | 801.43  | 2.557449 | 2 V.ENLNFRC chr2@1407   | 6.54E-11 | 0.001845 |
| 11Nov2011 | 13384 | 801.43  | 2.557449 | 2 V.ENLNFRC chr2@1407   | 1.46E-10 | 0.003648 |
| 11Nov2011 | 5677  | 831.43  | -12.728  | 1 K.DQGTKGI chr5@1999   | 1.07E-10 | 0.002589 |
| 11Nov2011 | 5949  | 831.44  | -0.6597  | 1 K.DQGTKGI chr5@1999   | 2.23E-10 | 0.004233 |

|           |       |         |          |                         |          |          |
|-----------|-------|---------|----------|-------------------------|----------|----------|
| 11Nov2011 | 6092  | 831.43  | -12.728  | 1 K.DQGTKGI chr5@199    | 4.72E-10 | 0.009032 |
| 11Nov2011 | 5382  | 831.43  | -12.728  | 1 K.DQGTKGI chr5@199    | 4.20E-10 | 0.008308 |
| 12Oct2011 | 2581  | 831.44  | -0.6597  | 1 K.DQGTKGI chr5@199    | 1.08E-10 | 0.002022 |
| 11Nov2011 | 6200  | 839.92  | -13.8233 | 2 D.YKQK+14 chr2@113    | 4.70E-10 | 0.00869  |
| 11Nov2011 | 6297  | 839.92  | -13.8233 | 2 D.YKQK+14 chr2@113    | 2.75E-10 | 0.005183 |
| 11Nov2011 | 6242  | 839.92  | -13.8233 | 2 D.YKQK+14 chr2@113    | 5.64E-10 | 0.009393 |
| 11Nov2011 | 26991 | 824.43  | -16.9741 | 2 R.FWTSLPV Splice@chr  | 4.72E-10 | 0.009436 |
| 12Oct2011 | 3240  | 543.32  | 26.41919 | 2 R.LPEGEAS Splice@chr  | 3.49E-10 | 0.007381 |
| 12Oct2011 | 342   | 451.75  | -27.6906 | 2 K.KREGERK chrX@606    | 2.17E-10 | 0.005272 |
| 11Nov2011 | 14134 | 711.85  | -2.70508 | 2 R.SLHTLFST Splice@chr | 7.32E-11 | 0.001861 |
| 12Oct2011 | 6603  | 711.85  | -2.70508 | 2 R.SLHTLFST Splice@chr | 2.50E-10 | 0.004893 |
| 12Oct2011 | 6677  | 711.85  | -2.70508 | 2 R.SLHTLFST Splice@chr | 1.31E-10 | 0.002524 |
| 12Oct2011 | 6636  | 711.85  | -2.70508 | 2 R.SLHTLFST Splice@chr | 6.41E-11 | 0.001471 |
| 12Oct2011 | 6490  | 711.85  | -2.70508 | 2 R.SLHTLFST Splice@chr | 3.78E-10 | 0.008492 |
| 12Oct2011 | 6445  | 711.85  | -2.70508 | 2 R.SLHTLFST Splice@chr | 3.86E-10 | 0.008734 |
| 11Nov2011 | 10925 | 810.42  | -27.8025 | 2 R.PM+15.9 chr2@672    | 9.53E-11 | 0.002043 |
| 11Nov2011 | 8583  | 573.34  | 9.768356 | 2 R.KNAELEIS chr4@207   | 2.16E-10 | 0.004772 |
| 12Oct2011 | 10899 | 810.44  | -18.3092 | 4 R.ELDAIDQ Splice@chr  | 7.80E-11 | 0.002007 |
| 12Oct2011 | 2251  | 515.95  | -24.8656 | 3 K.KLSENL chr1@696     | 2.15E-10 | 0.004927 |
| 12Oct2011 | 6001  | 682.94  | 24.05147 | 2 K.IKKK+14.1 chr5@204  | 2.65E-10 | 0.006954 |
| 11Nov2011 | 17836 | 725.4   | 23.00271 | 1 _PSVQTPP chr5@193     | 2.50E-10 | 0.006151 |
| 11Nov2011 | 13395 | 770.42  | 16.47276 | 2 K.KMTKK+1 chr5@147    | 3.60E-10 | 0.008131 |
| 11Nov2011 | 21895 | 846.42  | 6.249949 | 2 D.QENDVT chr3@510     | 4.33E-10 | 0.008111 |
| 12Oct2011 | 12819 | 829.93  | 6.890099 | 2 K.YRSVPS Splice@chr   | 1.20E-10 | 0.002726 |
| 11Nov2011 | 23002 | 938.98  | -23.6644 | 2 K.M+15.99 chr2@119    | 3.24E-10 | 0.006651 |
| 11Nov2011 | 19895 | 938.98  | -23.6644 | 2 K.M+15.99 chr2@119    | 2.66E-10 | 0.005791 |
| 12Oct2011 | 8171  | 938.98  | -23.6644 | 2 K.M+15.99 chr2@119    | 4.03E-10 | 0.009889 |
| 11Nov2011 | 20991 | 1072.55 | -28.1212 | 2 R.YFFLIKNY chr5@179   | 2.10E-10 | 0.005101 |
| 11Nov2011 | 23232 | 1072.55 | -28.1212 | 2 R.YFFLIKNY chr5@179   | 7.61E-11 | 0.002163 |
| 11Nov2011 | 26884 | 796.1   | 25.62622 | 3 K.NIIYLETIA chr5@875  | 1.73E-10 | 0.003355 |
| 11Nov2011 | 19126 | 825.96  | 1.963135 | 2 K.IVPSFSIQ chr5@185   | 3.14E-10 | 0.008432 |
| 11Nov2011 | 10866 | 1091.65 | -14.5055 | 1 K.KLQSIFNL Splice@chr | 2.58E-10 | 0.005745 |
| 11Nov2011 | 25744 | 819.1   | -26.6439 | 3 K.TMKINAI chr3@314    | 2.88E-10 | 0.00504  |
| 11Nov2011 | 17679 | 914.01  | -3.77797 | 2 K.K+14.016 chr3@151   | 3.49E-10 | 0.009097 |
| 12Oct2011 | 4704  | 1079.58 | 25.35245 | 1 R.FISHFTAE chr4@698   | 2.84E-10 | 0.008171 |
| 12Oct2011 | 5002  | 1079.58 | 25.35245 | 1 R.FISHFTAE chr4@698   | 2.71E-10 | 0.008276 |
| 12Oct2011 | 5027  | 1079.58 | 25.35245 | 1 R.FISHFTAE chr4@698   | 9.88E-11 | 0.001556 |
| 11Nov2011 | 20706 | 883.5   | 4.257133 | 2 R.KFGYLYH chrX@734    | 5.20E-10 | 0.008326 |
| 11Nov2011 | 20083 | 883.5   | 4.257133 | 2 R.KFGYLYH chrX@734    | 1.06E-10 | 0.002686 |
| 11Nov2011 | 21111 | 883.5   | 4.257133 | 2 R.KFGYLYH chrX@734    | 3.84E-10 | 0.00721  |
| 11Nov2011 | 18983 | 883.5   | 4.257133 | 2 R.KFGYLYH chrX@734    | 4.59E-11 | 0.001203 |
| 11Nov2011 | 17261 | 883.5   | 4.257133 | 2 R.KFGYLYH chrX@734    | 2.77E-10 | 0.005589 |
| 11Nov2011 | 10961 | 475.27  | -15.7005 | 2 R.LVFTLNSI chr2@150   | 4.39E-10 | 0.00965  |
| 11Nov2011 | 20483 | 985.55  | -19.0316 | 2 R.QLLNQIR chrX@113    | 3.23E-10 | 0.005517 |
| 11Nov2011 | 5911  | 424.24  | 21.3717  | 2 K.MSLRDP chr5@265     | 5.24E-10 | 0.008783 |
| 11Nov2011 | 5701  | 424.24  | 21.3717  | 2 K.MSLRDP chr5@265     | 5.22E-10 | 0.009663 |
| 11Nov2011 | 7922  | 489.94  | -29.5202 | 3 K.YTKNEKK Splice@chr  | 5.34E-10 | 0.009837 |

|           |       |         |          |                         |          |          |
|-----------|-------|---------|----------|-------------------------|----------|----------|
| 12Oct2011 | 10787 | 791.9   | -9.39797 | 4 K.KTEEVEM chr3@925    | 4.12E-10 | 0.009167 |
| 12Oct2011 | 6143  | 523.93  | 12.21678 | 3 K.TVISDM+ Splice@chr  | 1.39E-10 | 0.002524 |
| 11Nov2011 | 31743 | 898.47  | -10.8618 | 3 K.SLQDIIAI Splice@chr | 3.17E-10 | 0.006308 |
| 12Oct2011 | 10983 | 1054.58 | -1.82469 | 2 K.IEK+14.0: chr2@143  | 2.13E-10 | 0.005919 |
| 11Nov2011 | 8168  | 522.27  | -11.9431 | 2 _EVAEICLL chr2@923    | 2.19E-10 | 0.005101 |
| 11Nov2011 | 8200  | 522.27  | -11.9431 | 2 _EVAEICLL chr2@923    | 2.94E-10 | 0.007906 |
| 12Oct2011 | 10469 | 989.03  | -5.55973 | 2 K.WKLK+14 Splice@chr  | 4.45E-10 | 0.009785 |
| 12Oct2011 | 10540 | 989.03  | -5.55973 | 2 K.WKLK+14 Splice@chr  | 1.15E-10 | 0.003372 |
| 11Nov2011 | 13182 | 660.65  | -24.7823 | 4 K.PKPKNEC chr4@123    | 2.92E-10 | 0.004277 |
| 11Nov2011 | 829   | 585.79  | -24.4226 | 2 K.QDPISAT Splice@chr  | 3.91E-10 | 0.008528 |
| 11Nov2011 | 645   | 416.73  | 12.77326 | 2 R.TVDDGV chr2@673     | 1.42E-10 | 0.002908 |
| 12Oct2011 | 2066  | 841.48  | -16.3114 | 2 K.RTHTKKA chr5@62     | 2.29E-10 | 0.004655 |
| 12Oct2011 | 2744  | 841.48  | -16.3114 | 2 K.RTHTKKA chr5@62     | 1.67E-10 | 0.003052 |
| 11Nov2011 | 599   | 530.3   | 3.984176 | 2 K.QILSNNLI chr2@107   | 3.04E-10 | 0.00574  |
| 11Nov2011 | 618   | 530.3   | 3.984176 | 2 K.QILSNNLI chr2@107   | 1.58E-10 | 0.004169 |
| 11Nov2011 | 9255  | 852.45  | -9.24721 | 1 R.VSVPAD chr2@564     | 2.01E-10 | 0.004961 |
| 12Oct2011 | 10945 | 740.41  | -20.0828 | 1 R.VGTLGHF chr1@135    | 1.68E-10 | 0.002515 |
| 12Oct2011 | 5375  | 551.28  | 20.40935 | 2 R.SRYSCRM chr4@108    | 1.93E-10 | 0.005442 |
| 11Nov2011 | 32071 | 536.61  | -3.91359 | 3 K.FLYIPAFY chr5@876   | 7.63E-11 | 0.001849 |
| 11Nov2011 | 3588  | 782.4   | 19.81557 | 2 K.KYNFCNK chrX@260    | 5.53E-10 | 0.009264 |
| 11Nov2011 | 8057  | 421.75  | 22.26804 | 2 K.ILAGTDPI chr1@101   | 2.37E-10 | 0.00454  |
| 12Oct2011 | 13174 | 768.1   | -9.1001  | 3 F.HHK+14.( Splice@chr | 2.13E-10 | 0.004731 |
| 12Oct2011 | 7928  | 948.99  | -14.4606 | 2 K.RKRLSM+ Splice@chr  | 3.56E-10 | 0.008425 |
| 11Nov2011 | 36177 | 1236.61 | -2.32181 | 1 K.MSDSQIC Splice@chr  | 5.32E-10 | 0.009651 |
| 11Nov2011 | 14183 | 861.97  | -26.066  | 2 R.KTNLINIC chr4@445   | 2.53E-10 | 0.006664 |
| 11Nov2011 | 14235 | 861.97  | -26.066  | 2 R.KTNLINIC chr4@445   | 2.73E-10 | 0.00703  |
| 11Nov2011 | 17298 | 861.97  | -26.066  | 2 R.KTNLINIC chr4@445   | 4.62E-10 | 0.007963 |
| 11Nov2011 | 13972 | 861.97  | -26.066  | 2 R.KTNLINIC chr4@445   | 2.39E-10 | 0.006403 |
| 11Nov2011 | 13348 | 861.97  | -26.066  | 2 R.KTNLINIC chr4@445   | 2.94E-10 | 0.007906 |
| 11Nov2011 | 14822 | 861.97  | -26.066  | 2 R.KTNLINIC chr4@445   | 2.76E-10 | 0.007449 |
| 11Nov2011 | 14880 | 861.97  | -26.066  | 2 R.KTNLINIC chr4@445   | 2.37E-10 | 0.006454 |
| 11Nov2011 | 15974 | 861.97  | -26.066  | 2 R.KTNLINIC chr4@445   | 3.41E-10 | 0.007747 |
| 12Oct2011 | 7301  | 861.98  | -14.4333 | 2 R.KTNLINIC chr4@445   | 5.06E-10 | 0.00991  |
| 12Oct2011 | 6520  | 861.97  | -26.066  | 2 R.KTNLINIC chr4@445   | 4.42E-10 | 0.009645 |
| 11Nov2011 | 32495 | 952.53  | -6.47858 | 2 R.FEVITFVN chr4@277   | 1.52E-10 | 0.00269  |
| 11Nov2011 | 6284  | 979.48  | -22.019  | 1 R.HHFHVFF chr3@115    | 3.74E-10 | 0.006385 |
| 11Nov2011 | 13329 | 553.82  | -0.27433 | 2 R.VLMTSK+ chr3@843    | 7.35E-11 | 0.002056 |
| 11Nov2011 | 12340 | 1074.52 | -5.68553 | 2 R.RSPPMTI Splice@chr  | 3.31E-11 | 0.001351 |
| 11Nov2011 | 25136 | 770.38  | -24.7802 | 1 K.GTEHGLR chr3@120    | 3.82E-10 | 0.008528 |
| 11Nov2011 | 31799 | 1126.09 | -7.46163 | 2 K.WMKYPL chr4@800     | 1.67E-10 | 0.003585 |
| 11Nov2011 | 25788 | 1277.19 | 19.32223 | 2 R.KKWM+1 Splice@chr   | 1.64E-10 | 0.003217 |
| 11Nov2011 | 30456 | 784.35  | -23.5829 | 2 S.MNDMK+ chr5@120     | 1.25E-10 | 0.002737 |
| 12Oct2011 | 7889  | 783.93  | -14.2661 | 2 D.FKESEKSI chrX@705   | 1.58E-10 | 0.005126 |
| 12Oct2011 | 6099  | 570.05  | -4.26448 | 4 R.FFGFAQE chr5@207    | 3.64E-10 | 0.007758 |
| 12Oct2011 | 7443  | 570.05  | -4.26448 | 4 R.FFGFAQE chr5@207    | 4.05E-10 | 0.008125 |
| 11Nov2011 | 13028 | 1130.65 | 5.031232 | 1 _SSFLFIIFR Splice@chr | 3.39E-10 | 0.006211 |
| 11Nov2011 | 13365 | 1130.65 | 5.031232 | 1 _SSFLFIIFR Splice@chr | 6.00E-10 | 0.00672  |

|           |       |         |          |                           |          |          |
|-----------|-------|---------|----------|---------------------------|----------|----------|
| 11Nov2011 | 13247 | 1130.65 | 5.031232 | 1 _..SSFLFIIFR Splice@chr | 2.89E-10 | 0.005384 |
| 11Nov2011 | 23309 | 958.17  | 17.37294 | 3 R.FIEPIEDIF Splice@chr  | 4.29E-10 | 0.009357 |
| 12Oct2011 | 1181  | 441.89  | 18.92031 | 3 R.FNLSTGA chrX@325      | 1.12E-10 | 0.002201 |
| 12Oct2011 | 9648  | 1065.88 | -23.7545 | 3 K.INFKCTTL chr3@967     | 9.53E-11 | 0.003252 |
| 12Oct2011 | 11061 | 792.18  | -7.07959 | 4 K.KKTRKTYI chr5@187     | 1.55E-10 | 0.003749 |
| 11Nov2011 | 14363 | 653.36  | -23.7641 | 2 K.FHKISRTE chr5@185     | 6.04E-10 | 0.009461 |
| 11Nov2011 | 20820 | 883.99  | -22.3265 | 2 K.RK+14.01 chr2@677     | 5.45E-10 | 0.009301 |
| 11Nov2011 | 17696 | 590.56  | -12.816  | 4 K.QAAVFFK chrX@410      | 4.25E-10 | 0.008913 |
| 11Nov2011 | 30011 | 1245.64 | -0.17928 | 3 _..K+14.016 chr4@336    | 2.22E-11 | 4.41E-04 |
| 12Oct2011 | 4450  | 565.32  | 1.153692 | 3 W.ELEIKNC chr4@121      | 1.90E-11 | 5.34E-04 |
| 11Nov2011 | 9294  | 605.29  | -3.78902 | 2 K.NNLFTEN chr4@322      | 4.40E-10 | 0.009606 |
| 11Nov2011 | 12946 | 473.76  | 23.52508 | 2 K.NQLGDR Splice@chr     | 5.53E-10 | 0.009897 |
| 11Nov2011 | 12730 | 473.76  | 23.52508 | 2 K.NQLGDR Splice@chr     | 5.40E-10 | 0.008987 |
| 11Nov2011 | 21420 | 756.73  | -0.07985 | 3 F.FSQGVSE Splice@chr    | 4.03E-10 | 0.008766 |
| 12Oct2011 | 8747  | 762.4   | -28.9646 | 3 _..AQYK+14 chr1@133     | 2.02E-10 | 0.004455 |
| 11Nov2011 | 951   | 661.36  | -11.0913 | 1 R.FAGAAPK Splice@chr    | 2.17E-10 | 0.004034 |
| 11Nov2011 | 30740 | 742.38  | -4.59451 | 5 K.YFRKFLP chr4@934      | 1.38E-10 | 0.004193 |
| 11Nov2011 | 33230 | 858.44  | 7.901448 | 2 K.NKFIRRQ chrX@602      | 8.18E-12 | 6.92E-05 |
| 11Nov2011 | 31174 | 1163.09 | -7.43413 | 2 K.M+15.99 Splice@chr    | 3.57E-10 | 0.006007 |
| 12Oct2011 | 12509 | 1163.09 | -7.43413 | 2 K.M+15.99 Splice@chr    | 4.88E-10 | 0.00991  |
| 12Oct2011 | 9683  | 1163.09 | -7.43413 | 2 K.M+15.99 Splice@chr    | 3.05E-10 | 0.00805  |
| 12Oct2011 | 11666 | 1163.09 | -7.43413 | 2 K.M+15.99 Splice@chr    | 1.17E-10 | 0.002642 |
| 12Oct2011 | 13947 | 1163.09 | -7.43413 | 2 K.M+15.99 Splice@chr    | 2.71E-10 | 0.006037 |
| 11Nov2011 | 19142 | 916.98  | 5.663947 | 2 _..RCDK+14 chr5@146     | 3.67E-10 | 0.008734 |
| 12Oct2011 | 9954  | 803.9   | -12.619  | 2 R.KMFPENI chr2@398      | 2.92E-10 | 0.006957 |
| 11Nov2011 | 28282 | 1132.59 | -25.2311 | 3 _..PTYLFQV chrX@847     | 1.02E-10 | 0.002578 |
| 12Oct2011 | 4759  | 878.43  | 15.86037 | 1 K.FGNFHEK chr3@113      | 3.50E-10 | 0.006164 |
| 12Oct2011 | 4796  | 878.43  | 15.86037 | 1 K.FGNFHEK chr3@113      | 3.50E-10 | 0.006164 |
| 12Oct2011 | 6626  | 765.37  | -7.07001 | 2 R.SIYEQRAI chr2@363     | 3.66E-10 | 0.00985  |
| 12Oct2011 | 599   | 920.45  | 26.15551 | 1 K.KCDIDNR chr1@286      | 2.20E-10 | 0.005124 |
| 11Nov2011 | 26390 | 889.48  | 6.290553 | 2 _..QRLTRGC Splice@chr   | 2.98E-11 | 0.001107 |
| 11Nov2011 | 7282  | 569.32  | -27.1139 | 3 _..SLVPIFTG chr5@184    | 3.25E-10 | 0.007687 |
| 11Nov2011 | 14470 | 1035.59 | -8.91473 | 1 R.SGGRSTT chr5@185      | 3.72E-10 | 0.006998 |
| 11Nov2011 | 16557 | 906.99  | 1.787457 | 2 G.TLQASG Splice@chr     | 3.02E-10 | 0.005393 |
| 11Nov2011 | 15816 | 907     | 12.84212 | 2 G.TLQASG Splice@chr     | 2.38E-10 | 0.004355 |
| 11Nov2011 | 13279 | 523.29  | 23.92397 | 2 K.VIADNDK chr1@366      | 5.40E-11 | 0.00149  |
| 12Oct2011 | 9260  | 833.93  | 22.42368 | 2 K.QNQNES chr4@586       | 2.92E-11 | 9.01E-04 |
| 11Nov2011 | 23852 | 697.38  | 23.40238 | 2 R.WLKM+1 chr5@144       | 2.11E-10 | 0.004105 |
| 12Oct2011 | 3487  | 532.29  | 26.50823 | 2 K.WSLIECV chr3@704      | 1.90E-10 | 0.003903 |
| 11Nov2011 | 19204 | 683.38  | -13.9172 | 2 _..SFILAITS Splice@chr  | 1.52E-10 | 0.002933 |
| 11Nov2011 | 3995  | 408.96  | -28.5754 | 4 K.EKNIM+1 chrX@100      | 2.16E-10 | 0.004346 |
| 11Nov2011 | 4161  | 408.96  | -28.5754 | 4 K.EKNIM+1 chrX@100      | 1.46E-10 | 0.00355  |
| 11Nov2011 | 9500  | 741.37  | 11.87144 | 2 R.WGK+14 chr5@150       | 2.37E-10 | 0.006276 |
| 11Nov2011 | 18137 | 987.02  | 5.296348 | 2 R.KNERERE chrX@572      | 1.15E-10 | 0.002725 |
| 12Oct2011 | 5521  | 682.33  | 9.710778 | 3 K.VKEKLSI chr1@970      | 2.01E-10 | 0.005408 |
| 12Oct2011 | 7946  | 706.7   | -22.0256 | 3 K.ILM+15.9 Splice@chr   | 3.01E-10 | 0.007757 |
| 11Nov2011 | 25082 | 893.47  | 7.454525 | 1 _..GLQAWY Splice@chr    | 4.02E-10 | 0.00896  |

|           |       |         |          |                          |          |          |
|-----------|-------|---------|----------|--------------------------|----------|----------|
| 11Nov2011 | 30388 | 1199.09 | 15.41816 | 2 K.PTWWHF Splice@chr    | 3.66E-10 | 0.005578 |
| 11Nov2011 | 10474 | 613.36  | 7.732827 | 2 R.KEKDFGL chr1@780     | 3.81E-10 | 0.006834 |
| 11Nov2011 | 10640 | 613.36  | 7.732827 | 2 R.KEKDFGL chr1@780     | 5.71E-10 | 0.006623 |
| 11Nov2011 | 3503  | 721.4   | 16.01326 | 1 R.FSATPAK chr4@421     | 7.34E-10 | 0.008221 |
| 11Nov2011 | 19352 | 832.44  | 5.673286 | 4 K.FFKDIMV chr3@469     | 1.36E-10 | 0.003596 |
| 11Nov2011 | 31018 | 1125.26 | -26.4818 | 3 _..KIIK+14.0 chr5@378  | 2.01E-11 | 4.26E-04 |
| 11Nov2011 | 6171  | 517.27  | -6.62056 | 2 R.RSQSADT chr5@358     | 6.08E-10 | 0.00985  |
| 12Oct2011 | 6354  | 521.27  | 5.194802 | 4 K.HPCSRM- chr2@175     | 1.56E-10 | 0.002704 |
| 11Nov2011 | 13065 | 523.81  | 5.403158 | 4 K.SIKIFGRLI Splice@chr | 3.13E-10 | 0.005609 |
| 11Nov2011 | 2756  | 645.4   | -27.724  | 2 _..K+14.016 Splice@chr | 2.64E-10 | 0.005477 |
| 11Nov2011 | 16049 | 837.43  | 5.075887 | 2 S.LLSK+14.( Splice@chr | 3.07E-10 | 0.004431 |
| 11Nov2011 | 21077 | 816.43  | 9.026495 | 2 R.LIIDAAEH Splice@chr  | 4.41E-10 | 0.007666 |
| 11Nov2011 | 21010 | 816.44  | 21.30973 | 2 R.LIIDAAEH Splice@chr  | 2.41E-10 | 0.00446  |
| 11Nov2011 | 21332 | 816.44  | 21.30973 | 2 R.LIIDAAEH Splice@chr  | 5.20E-10 | 0.007715 |
| 11Nov2011 | 19325 | 816.43  | 9.026495 | 2 R.LIIDAAEH Splice@chr  | 4.44E-10 | 0.009912 |
| 11Nov2011 | 20699 | 816.44  | 21.30973 | 2 R.LIIDAAEH Splice@chr  | 4.48E-10 | 0.009293 |
| 12Oct2011 | 7207  | 1118.07 | -16.2612 | 2 _..IEM+15.9 Splice@chr | 2.93E-10 | 0.006632 |
| 11Nov2011 | 2126  | 588.34  | -22.0994 | 2 _..AEIQAFK\ chr3@319   | 5.65E-11 | 0.001077 |
| 11Nov2011 | 2098  | 588.34  | -22.0994 | 2 _..AEIQAFK\ chr3@319   | 3.49E-11 | 0.001351 |
| 12Oct2011 | 2245  | 678.37  | 4.685592 | 2 V.FQHKNCI chr5@696     | 2.66E-10 | 0.006545 |
| 11Nov2011 | 4839  | 624.34  | 28.56849 | 2 K.KNHQFPI chr3@261     | 2.82E-10 | 0.004121 |
| 11Nov2011 | 26591 | 791.4   | 10.82757 | 1 R.GTLCSPR chrX@732     | 3.33E-10 | 0.005965 |
| 11Nov2011 | 15152 | 849.92  | 2.804033 | 2 R.QTSEFKD Splice@chr   | 2.60E-10 | 0.005455 |
| 11Nov2011 | 6765  | 404.22  | 0.908235 | 3 K.PTPQQA\ chr3@404     | 5.27E-11 | 0.00135  |
| 11Nov2011 | 7278  | 404.22  | 0.908235 | 3 K.PTPQQA\ chr3@404     | 2.36E-10 | 0.004587 |
| 11Nov2011 | 6427  | 404.22  | 0.908235 | 3 K.PTPQQA\ chr3@404     | 4.61E-11 | 0.001187 |
| 11Nov2011 | 32970 | 1338.69 | -25.0803 | 2 R.LQHQLP+ Splice@chr   | 2.56E-10 | 0.00487  |
| 12Oct2011 | 8239  | 618.34  | -16.8734 | 3 R.AEEEPRD chr3@917     | 4.82E-10 | 0.00991  |
| 11Nov2011 | 23688 | 754.09  | 27.70513 | 3 _..KEQNYG1 Splice@chr  | 1.44E-10 | 0.002665 |
| 11Nov2011 | 7085  | 561.3   | -16.0131 | 2 R.M+15.99 chr1@694     | 2.16E-10 | 0.004704 |
| 11Nov2011 | 5964  | 832.43  | -20.5033 | 1 K.ENGRSLR chrX@223     | 7.83E-10 | 0.009028 |
| 11Nov2011 | 2543  | 534.26  | -14.9712 | 4 _..QFPSQRC chr5@185    | 4.64E-11 | 9.37E-04 |
| 11Nov2011 | 24068 | 1150.1  | 6.297967 | 2 F.PRQNSQ\ chrX@316     | 2.68E-10 | 0.007249 |
| 12Oct2011 | 7861  | 693.36  | -12.7461 | 2 K.WQQFVT chr3@107      | 2.18E-10 | 0.006464 |
| 12Oct2011 | 7096  | 683.05  | -17.9571 | 3 K.RKNCK+1 Splice@chr   | 4.12E-10 | 0.009284 |
| 11Nov2011 | 19939 | 1043.58 | -9.36677 | 2 K.K+14.016 chr4@151    | 4.23E-11 | 0.001199 |
| 11Nov2011 | 20332 | 543.81  | -4.89386 | 2 _..TRLPSCIP chr4@477   | 6.07E-10 | 0.009887 |
| 11Nov2011 | 20021 | 543.81  | -4.89386 | 2 _..TRLPSCIP chr4@477   | 1.88E-10 | 0.004025 |
| 11Nov2011 | 19411 | 543.81  | -4.89386 | 2 _..TRLPSCIP chr4@477   | 5.92E-10 | 0.009587 |
| 12Oct2011 | 7709  | 901.99  | 3.04844  | 2 E.DQAK+14 Splice@chr   | 2.00E-10 | 0.005442 |
| 12Oct2011 | 5273  | 598.32  | -6.90131 | 2 K.KSLSENI chr4@373     | 2.57E-10 | 0.005885 |
| 11Nov2011 | 33246 | 984.47  | -2.54452 | 1 K.IAGFNFCI chr5@322    | 5.64E-10 | 0.009883 |
| 11Nov2011 | 30529 | 945.16  | -17.9121 | 3 _..KYSFILM+ chr2@500   | 3.64E-10 | 0.007825 |
| 11Nov2011 | 30030 | 1197.1  | -17.8408 | 2 K.FFFHRM+ chrX@368     | 4.36E-10 | 0.009536 |
| 11Nov2011 | 406   | 823.42  | -23.1545 | 2 R.KYEEVRY Splice@chr   | 4.42E-13 | 0        |
| 12Oct2011 | 12066 | 919     | -5.81965 | 2 K.M+15.99 chr4@111     | 9.47E-11 | 0.002901 |
| 11Nov2011 | 34723 | 858.43  | -2.38482 | 2 K.FEK+14.0 chr2@149    | 1.42E-10 | 0.003322 |

|           |       |         |          |                          |          |          |
|-----------|-------|---------|----------|--------------------------|----------|----------|
| 12Oct2011 | 11510 | 692.92  | 28.82459 | 2 K.QTIITEYK chr3@1014   | 2.46E-10 | 0.005689 |
| 12Oct2011 | 1933  | 563.83  | -29.0624 | 2 K.TWVKPAI chr5@4703    | 8.99E-11 | 0.00282  |
| 12Oct2011 | 2937  | 480.26  | 2.801818 | 3 L.RPM+15.1 chrX@1289   | 2.76E-10 | 0.006051 |
| 11Nov2011 | 25474 | 1113.59 | -15.3173 | 1 K.RRRQEDF chr2@1318    | 4.68E-10 | 0.009791 |
| 11Nov2011 | 23856 | 1113.59 | -15.3173 | 1 K.RRRQEDF chr2@1318    | 2.54E-10 | 0.006047 |
| 11Nov2011 | 11659 | 779.92  | -23.0114 | 2 K.PLERLSDI Splice@chr  | 3.85E-10 | 0.006509 |
| 11Nov2011 | 11660 | 779.42  | -20.8566 | 2 K.PLERLSDI Splice@chr  | 2.37E-10 | 0.004548 |
| 11Nov2011 | 11759 | 779.42  | -20.8566 | 2 K.PLERLSDI Splice@chr  | 5.65E-10 | 0.009312 |
| 11Nov2011 | 20906 | 785.39  | -26.3001 | 2 Q.M+15.99 chr5@1270    | 2.46E-10 | 0.006572 |
| 11Nov2011 | 35382 | 1297.34 | -23.5935 | 3 R.LVM+15. chr1@1406    | 6.21E-11 | 0.001643 |
| 11Nov2011 | 20176 | 608.31  | 23.81957 | 2 K.FGELSSFI chr4@1335   | 4.04E-10 | 0.008766 |
| 11Nov2011 | 18519 | 550.81  | -17.5397 | 2 R.RILEDVID chr3@9107   | 5.96E-12 | 8.49E-05 |
| 12Oct2011 | 3359  | 1233.63 | -9.20999 | 1 K.NIEKDM\ chr4@8584    | 2.60E-10 | 0.009562 |
| 12Oct2011 | 3686  | 1233.63 | -9.20999 | 1 K.NIEKDM\ chr4@8584    | 3.68E-10 | 0.007758 |
| 11Nov2011 | 20913 | 906.94  | -11.8966 | 2 K.QIYWPCY chr3@4122    | 1.29E-11 | 2.14E-04 |
| 11Nov2011 | 15723 | 901.98  | -5.99743 | 2 R.QQLNCIS chr5@6230    | 1.34E-10 | 0.002943 |
| 12Oct2011 | 117   | 590.28  | -23.5115 | 2 K.IEKFYQQ\ chrX@8858   | 6.41E-11 | 0.001979 |
| 11Nov2011 | 26646 | 1197.97 | -25.0087 | 3 K.LTEFQIFC chr1@1175   | 2.08E-10 | 0.002735 |
| 11Nov2011 | 10355 | 929.53  | 6.244736 | 1 K.MKIPANC chr5@1788    | 3.49E-10 | 0.006402 |
| 11Nov2011 | 10409 | 929.53  | 6.244736 | 1 K.MKIPANC chr5@1788    | 2.41E-10 | 0.004276 |
| 11Nov2011 | 31539 | 1114.11 | -6.22539 | 2 R.KCHFRQI\ Splice@chr  | 9.88E-11 | 0.002802 |
| 11Nov2011 | 6042  | 882.47  | -7.5536  | 1 R.TGAKFET chrX@1183    | 3.98E-11 | 0.001069 |
| 11Nov2011 | 25813 | 670.67  | -20.212  | 3 K.M+15.99 chrX@1695    | 1.13E-10 | 0.002246 |
| 11Nov2011 | 25914 | 670.67  | -20.212  | 3 K.M+15.99 chrX@1695    | 1.62E-10 | 0.003079 |
| 11Nov2011 | 25704 | 670.33  | -28.5111 | 3 K.M+15.99 chrX@1695    | 5.14E-10 | 0.009003 |
| 11Nov2011 | 25389 | 670.67  | -20.212  | 3 K.M+15.99 chrX@1695    | 1.91E-10 | 0.004143 |
| 11Nov2011 | 28073 | 855.47  | 28.26965 | 2 F.RNK+14.( chr5@4231   | 3.36E-10 | 0.005997 |
| 12Oct2011 | 9387  | 987.54  | -17.5472 | 2 L.HRHKKW chr4@1284     | 1.67E-10 | 0.004323 |
| 11Nov2011 | 27012 | 642.71  | -3.74115 | 3 K.NLINTKKI chr2@1415   | 5.50E-10 | 0.00996  |
| 11Nov2011 | 33119 | 840.1   | 0.898332 | 3 R.IYFWLTM chr5@3648    | 3.55E-11 | 7.17E-04 |
| 11Nov2011 | 24773 | 840.11  | 12.92941 | 3 R.IYFWLTM chr5@3648    | 3.58E-10 | 0.007761 |
| 11Nov2011 | 32776 | 840.1   | 0.898332 | 3 R.IYFWLTM chr5@3648    | 4.69E-10 | 0.009513 |
| 12Oct2011 | 3873  | 815.93  | -18.6966 | 2 R.FFQNSKF chr2@1341    | 8.99E-11 | 0.002001 |
| 12Oct2011 | 5142  | 706.68  | -13.0313 | 3 A.FKKYCNF chr5@6265    | 1.30E-10 | 0.003483 |
| 11Nov2011 | 11908 | 421.25  | 28.95162 | 3 _EIVGMPA chr5@4046     | 6.16E-10 | 0.00985  |
| 11Nov2011 | 12110 | 421.25  | 28.95162 | 3 _EIVGMPA chr5@4046     | 5.35E-10 | 0.009355 |
| 11Nov2011 | 19441 | 994.56  | 6.854173 | 2 K.ILIFFSIKK\ chr1@8866 | 1.22E-10 | 0.0023   |
| 11Nov2011 | 21873 | 801.46  | 20.33397 | 3 R.RSCAVYF chr1@1218    | 5.36E-10 | 0.009922 |
| 11Nov2011 | 9744  | 696.85  | -15.6665 | 2 E.PSKKASM chr2@1191    | 2.21E-10 | 0.00582  |
| 11Nov2011 | 28527 | 1044.56 | -4.73833 | 3 K.QLESKIFC chr2@1303   | 4.44E-11 | 0.001203 |
| 11Nov2011 | 8818  | 450.25  | 28.36219 | 2 K.LLTDQTH chr5@1848    | 3.35E-10 | 0.008922 |
| 12Oct2011 | 4333  | 450.25  | 28.36219 | 2 K.LLTDQTH chr5@1848    | 1.18E-10 | 0.002642 |
| 12Oct2011 | 3772  | 450.25  | 28.36219 | 2 K.LLTDQTH chr5@1848    | 2.64E-10 | 0.004293 |
| 11Nov2011 | 34992 | 1323.66 | 3.003402 | 1 K.KM+15.9 chr5@2278    | 5.57E-11 | 0.00161  |
| 11Nov2011 | 3829  | 832.44  | 5.073997 | 1 K.NTVGAGI chr4@3368    | 4.61E-10 | 0.008767 |
| 11Nov2011 | 11368 | 929.47  | 7.822871 | 1 R.EICKSKHR. Splice@chr | 8.16E-10 | 0.009344 |
| 11Nov2011 | 30756 | 1196.66 | -20.0783 | 3 K.IFCK+14.( chr4@1487  | 1.08E-10 | 0.002189 |

|           |       |         |          |                         |          |          |
|-----------|-------|---------|----------|-------------------------|----------|----------|
| 12Oct2011 | 1920  | 1046.55 | -26.8525 | 1 R.MRNGEK chr5@2079    | 3.98E-11 | 9.01E-04 |
| 11Nov2011 | 33257 | 1210.65 | 1.540473 | 2 N.WEIIAVT chr1@1694   | 7.32E-11 | 0.002182 |
| 11Nov2011 | 18660 | 883.99  | -27.9944 | 2 R.VMRRLLPI Splice@chr | 1.89E-10 | 0.005079 |
| 11Nov2011 | 21127 | 705.84  | -0.47509 | 2 K.CSSKTPSS chrX@3398  | 4.53E-10 | 0.00746  |
| 11Nov2011 | 7891  | 1303.63 | 7.430354 | 2 R.QFAENQI chr3@2061   | 3.68E-10 | 0.006543 |
| 12Oct2011 | 2076  | 685.85  | -4.99086 | 2 R.PTCVQKA chr5@1902   | 2.00E-10 | 0.006726 |
| 12Oct2011 | 2555  | 685.85  | -4.99086 | 2 R.PTCVQKA chr5@1902   | 3.52E-10 | 0.009651 |
| 12Oct2011 | 1743  | 521.29  | 20.6228  | 3 K.YFFEFSTRF chr1@4832 | 1.01E-11 | 2.34E-04 |
| 12Oct2011 | 1215  | 584.28  | 4.034068 | 2 R.QNLNSFL Splice@chr  | 3.42E-10 | 0.008332 |
| 12Oct2011 | 8527  | 1083.03 | -22.4313 | 2 R.WMWRV chr3@8962     | 1.79E-10 | 0.005163 |
| 11Nov2011 | 4018  | 459.26  | 7.258973 | 2 R.LTAIDSA/ Splice@chr | 5.46E-10 | 0.00999  |
| 11Nov2011 | 32942 | 1031.1  | 14.81325 | 2 W.M+15.9 chrX@1284    | 6.98E-10 | 0.008067 |
| 11Nov2011 | 35417 | 1372.73 | -28.0057 | 1 R.LQKHTFC chr5@3969   | 3.12E-10 | 0.004431 |
| 11Nov2011 | 10276 | 928.49  | 3.559775 | 1 R.EPRCLPR chrX@2558   | 2.84E-10 | 0.007792 |
| 11Nov2011 | 34576 | 1068.82 | -21.5546 | 3 R.QLVVMG Splice@chr   | 7.62E-13 | 7.08E-05 |
| 11Nov2011 | 29251 | 985.55  | -16.6908 | 1 K.K+14.016 chr4@4301  | 5.26E-10 | 0.009788 |
| 11Nov2011 | 20296 | 684.37  | 27.84471 | 2 R.FWYIHRE chr5@3416   | 5.25E-10 | 0.008331 |
| 11Nov2011 | 21104 | 684.37  | 27.84471 | 2 R.FWYIHRE chr5@3416   | 5.16E-10 | 0.009824 |
| 11Nov2011 | 19567 | 684.37  | 27.84471 | 2 R.FWYIHRE chr5@3416   | 2.32E-10 | 0.005143 |
| 11Nov2011 | 16095 | 693.88  | -11.3635 | 2 K.NCPIFRN chr5@1974   | 1.86E-10 | 0.003981 |
| 11Nov2011 | 14171 | 560.32  | 4.255908 | 2 P.NLHAVT/ chr1@1231   | 3.17E-10 | 0.005998 |
| 11Nov2011 | 14325 | 764.39  | 0.761466 | 2 _FICTIPDK chr5@1509   | 4.89E-10 | 0.008036 |
| 11Nov2011 | 33046 | 1166.94 | -5.21829 | 3 K.YLSKKQN chr4@4621   | 4.00E-10 | 0.009021 |
| 11Nov2011 | 11851 | 471.24  | -1.10328 | 2 K.NLFAFSD chr4@1275   | 1.35E-10 | 0.003008 |
| 11Nov2011 | 11689 | 471.75  | 16.6164  | 2 K.NLFAFSD chr4@1275   | 1.21E-10 | 0.002782 |
| 11Nov2011 | 11712 | 471.24  | -1.10328 | 2 K.NLFAFSD chr4@1275   | 1.21E-10 | 0.002782 |
| 11Nov2011 | 12291 | 471.24  | -1.10328 | 2 K.NLFAFSD chr4@1275   | 2.42E-10 | 0.005133 |
| 11Nov2011 | 15246 | 882.48  | 3.88444  | 1 K.YGTGLDK chr4@4668   | 1.71E-11 | 4.57E-04 |
| 11Nov2011 | 26583 | 1071.02 | -1.45424 | 2 Q.SLKFCSKI chr3@9566  | 4.01E-10 | 0.006103 |
| 12Oct2011 | 13084 | 699.05  | -5.56848 | 3 R.LFFQNFK chr2@1220   | 2.10E-11 | 9.95E-04 |
| 11Nov2011 | 25938 | 817.42  | 19.83729 | 4 K.IMVDNVI chr4@8264   | 3.73E-11 | 8.23E-04 |
| 11Nov2011 | 28064 | 817.17  | 20.86493 | 4 K.IMVDNVI chr4@8264   | 1.66E-10 | 0.003248 |
| 11Nov2011 | 26376 | 817.42  | 19.83729 | 4 K.IMVDNVI chr4@8264   | 4.84E-10 | 0.007727 |
| 11Nov2011 | 27540 | 817.17  | 20.86493 | 4 K.IMVDNVI chr4@8264   | 1.94E-10 | 0.004193 |
| 11Nov2011 | 26450 | 817.42  | 19.83729 | 4 K.IMVDNVI chr4@8264   | 2.67E-11 | 4.83E-04 |
| 11Nov2011 | 22316 | 724.02  | -21.141  | 3 _RGVEM+ chr5@3185     | 3.07E-10 | 0.00521  |
| 12Oct2011 | 3256  | 597.3   | 8.256931 | 3 K.SWGGGC chrX@2524    | 3.82E-10 | 0.009821 |
| 11Nov2011 | 15236 | 640.85  | -17.9933 | 2 R.LMSNVM chr2@1215    | 5.52E-10 | 0.009264 |
| 11Nov2011 | 15410 | 640.85  | -17.9933 | 2 R.LMSNVM chr2@1215    | 3.26E-10 | 0.006474 |
| 12Oct2011 | 2129  | 984.85  | 9.702657 | 3 I.TAICQFAK chr3@1198  | 1.23E-10 | 0.002275 |
| 12Oct2011 | 6604  | 906.43  | 0.741518 | 2 K.SQKFYFFI chr4@8098  | 1.79E-10 | 0.005975 |
| 12Oct2011 | 3103  | 507.28  | -4.17933 | 3 V.EFLRSGM chr3@6255   | 2.71E-10 | 0.007336 |
| 12Oct2011 | 3140  | 507.28  | -4.17933 | 3 V.EFLRSGM chr3@6255   | 2.81E-10 | 0.007331 |
| 12Oct2011 | 3925  | 507.28  | -4.17933 | 3 V.EFLRSGM chr3@6255   | 1.63E-10 | 0.003381 |
| 12Oct2011 | 4003  | 507.28  | -4.17933 | 3 V.EFLRSGM chr3@6255   | 9.36E-11 | 0.001667 |
| 11Nov2011 | 7018  | 719.86  | -17.9684 | 2 L.RFPMTVE chr1@9136   | 1.51E-10 | 0.004571 |
| 11Nov2011 | 7537  | 719.86  | -17.9684 | 2 L.RFPMTVE chr1@9136   | 2.61E-10 | 0.007184 |

|           |       |         |          |                         |          |          |
|-----------|-------|---------|----------|-------------------------|----------|----------|
| 11Nov2011 | 3206  | 752.36  | -29.0808 | 2 R.LSEILNMI chr4@1051  | 4.45E-10 | 0.008088 |
| 11Nov2011 | 3298  | 752.37  | -15.7589 | 2 R.LSEILNMI chr4@1051  | 3.80E-10 | 0.004794 |
| 12Oct2011 | 1247  | 752.37  | -15.7589 | 2 R.LSEILNMI chr4@1051  | 1.83E-10 | 0.003655 |
| 12Oct2011 | 1194  | 752.37  | -15.7589 | 2 R.LSEILNMI chr4@1051  | 3.20E-10 | 0.007263 |
| 11Nov2011 | 33146 | 803.41  | 5.933147 | 1 R.SPWSAQ chr2@1406    | 5.49E-10 | 0.009612 |
| 11Nov2011 | 25057 | 803.41  | 5.933147 | 1 R.SPWSAQ chr2@1406    | 2.38E-10 | 0.004897 |
| 11Nov2011 | 22541 | 1157.94 | -22.9192 | 3 R.LVPLENK chrX@1254   | 5.95E-11 | 0.001537 |
| 11Nov2011 | 9184  | 741.92  | 8.451028 | 2 H.RALLFRK chrX@1563   | 4.32E-10 | 0.007202 |
| 11Nov2011 | 6866  | 1334.69 | -8.47111 | 1 R.LFM+15.1 chr1@5644  | 3.83E-10 | 0.009943 |
| 11Nov2011 | 22869 | 840.44  | 27.84872 | 2 R.KNASVNI Splice@chr  | 3.95E-10 | 0.007586 |
| 11Nov2011 | 23698 | 988.04  | 8.32247  | 2 K.FDYFNMI chr4@1602   | 4.66E-10 | 0.00836  |
| 11Nov2011 | 23643 | 988.04  | 8.32247  | 2 K.FDYFNMI chr4@1602   | 5.11E-10 | 0.008172 |
| 11Nov2011 | 22205 | 988.04  | 8.32247  | 2 K.FDYFNMI chr4@1602   | 3.51E-10 | 0.008005 |
| 11Nov2011 | 22754 | 988.04  | 8.32247  | 2 K.FDYFNMI chr4@1602   | 1.94E-10 | 0.004491 |
| 12Oct2011 | 11129 | 1037.56 | -4.80022 | 2 R.KVEETKI chr5@8130   | 1.28E-10 | 0.004251 |
| 12Oct2011 | 1318  | 747.4   | -28.6787 | 2 K.TPPNPKF chr1@1146   | 1.93E-10 | 0.00338  |
| 11Nov2011 | 31329 | 1075.54 | -12.935  | 3 K.LNIFFES chr4@8040   | 5.02E-10 | 0.009619 |
| 11Nov2011 | 28003 | 981.03  | -18.6608 | 2 R.RRRWAT chr2@1364    | 1.36E-10 | 0.004193 |
| 11Nov2011 | 32648 | 630.34  | 11.6132  | 3 _VGFVGN Splice@chr    | 1.86E-10 | 0.003443 |
| 11Nov2011 | 13466 | 948.51  | -19.9461 | 2 R.KKKM+15 chr5@1580   | 3.00E-10 | 0.005765 |
| 11Nov2011 | 22321 | 751.37  | 28.63283 | 2 R.HEQIDGL Splice@chr  | 2.49E-10 | 0.004858 |
| 11Nov2011 | 27596 | 769.38  | 25.87484 | 2 R.CHLICPFT Splice@chr | 6.45E-10 | 0.00996  |
| 11Nov2011 | 5682  | 816.39  | -17.7402 | 1 K.FGGFFGC chr5@1988   | 2.48E-11 | 4.65E-04 |
| 11Nov2011 | 5632  | 816.39  | -17.7402 | 1 K.FGGFFGC chr5@1988   | 2.48E-11 | 4.65E-04 |
| 11Nov2011 | 1411  | 559.35  | 20.44232 | 2 R.AKK+14.1 chr4@3567  | 4.98E-10 | 0.008431 |
| 11Nov2011 | 16692 | 884     | 3.078952 | 2 K.LFFSFLRV chr3@1012  | 3.22E-10 | 0.009789 |
| 11Nov2011 | 33826 | 862.78  | -16.6965 | 3 K.FFFCFSR/ chr1@6068  | 3.30E-10 | 0.004068 |
| 12Oct2011 | 7775  | 633.9   | 9.74038  | 2 R.FLLRYTRK Splice@chr | 1.91E-10 | 0.002984 |
| 11Nov2011 | 26939 | 754.39  | -0.76873 | 2 K.KK+14.01 chrX@5319  | 5.46E-10 | 0.008789 |
| 12Oct2011 | 4340  | 594.28  | -21.9239 | 3 Y.KSYGLAQ chr3@6280   | 1.16E-10 | 0.002503 |
| 11Nov2011 | 33928 | 1052.26 | 0.387063 | 3 R.NRNVPV Splice@chr   | 1.68E-10 | 0.003138 |
| 11Nov2011 | 21572 | 721.87  | -19.4736 | 2 R.ESEIVHTI chrX@1209  | 2.23E-10 | 0.005143 |
| 11Nov2011 | 32106 | 1067.56 | 19.61073 | 2 K.MEIQWF chr5@1896    | 2.43E-10 | 0.004623 |
| 11Nov2011 | 8983  | 542.77  | -2.47852 | 2 N.MNTVYE chr4@5520    | 3.02E-10 | 0.006201 |
| 11Nov2011 | 31302 | 975.04  | 4.922657 | 2 K.NGLK+14 chrX@8142   | 4.24E-10 | 0.007042 |
| 11Nov2011 | 23807 | 864.09  | -17.6144 | 3 _TITEQIQE Splice@chr  | 2.30E-10 | 0.004361 |
| 11Nov2011 | 18735 | 901.95  | 3.153142 | 2 _IKNSHTQ Splice@chr   | 2.37E-10 | 0.004726 |
| 11Nov2011 | 26984 | 872.45  | 15.57156 | 4 R.SSM+15.1 Splice@chr | 1.15E-10 | 0.003341 |
| 12Oct2011 | 14251 | 1129.04 | 11.61524 | 3 F.LVIQKKEK chr2@8836  | 2.81E-10 | 0.006365 |
| 11Nov2011 | 31957 | 1017.55 | 26.40321 | 2 K.CMFDVY chr1@7477    | 4.62E-10 | 0.006064 |
| 11Nov2011 | 26143 | 894.97  | 9.599299 | 2 _WEESKLS chr2@8463    | 1.72E-10 | 0.003668 |
| 11Nov2011 | 4513  | 500.94  | -13.5108 | 3 K.IAEK+14.1 chr3@2136 | 2.30E-10 | 0.004976 |
| 12Oct2011 | 1376  | 500.94  | -13.5108 | 3 K.IAEK+14.1 chr3@2136 | 1.50E-10 | 0.003729 |
| 12Oct2011 | 1585  | 500.94  | -13.5108 | 3 K.IAEK+14.1 chr3@2136 | 7.48E-11 | 6.83E-04 |
| 11Nov2011 | 36508 | 942.02  | 14.24597 | 2 K.RWHRES chrX@6823    | 2.64E-10 | 0.005844 |
| 11Nov2011 | 26732 | 928     | -0.03178 | 2 K.VFFCFSIK chrX@8240  | 1.49E-10 | 0.003318 |
| 12Oct2011 | 2451  | 504.92  | 3.112308 | 3 R.CMQK+1 chr4@3905    | 3.43E-10 | 0.008425 |

|           |       |         |          |                         |          |          |
|-----------|-------|---------|----------|-------------------------|----------|----------|
| 11Nov2011 | 4295  | 593.31  | -19.2324 | 2 K.FKGLDFS chr1@1077   | 3.33E-10 | 0.005965 |
| 11Nov2011 | 1468  | 436.75  | -3.71189 | 2 K.IGAQIGS chr2@2731   | 1.60E-11 | 3.60E-04 |
| 11Nov2011 | 1626  | 436.75  | -3.71189 | 2 K.IGAQIGS chr2@2731   | 3.37E-10 | 0.008762 |
| 11Nov2011 | 1477  | 436.75  | -3.71189 | 2 K.IGAQIGS chr2@2731   | 3.43E-11 | 7.13E-04 |
| 11Nov2011 | 8307  | 747.4   | 10.27103 | 2 K.KFGRK+1 chrX@2967   | 2.94E-10 | 0.004277 |
| 11Nov2011 | 8335  | 747.4   | 10.27103 | 2 K.KFGRK+1 chrX@2967   | 8.11E-11 | 8.76E-04 |
| 11Nov2011 | 8153  | 747.4   | 10.27103 | 2 K.KFGRK+1 chrX@2967   | 4.71E-10 | 0.009824 |
| 11Nov2011 | 8290  | 747.4   | 10.27103 | 2 K.KFGRK+1 chrX@2967   | 1.63E-10 | 0.002719 |
| 11Nov2011 | 8344  | 747.4   | 10.27103 | 2 K.KFGRK+1 chrX@2967   | 1.38E-10 | 0.002484 |
| 11Nov2011 | 11155 | 600.78  | -18.1779 | 2 _MMFATR Splice@chr    | 2.42E-10 | 0.004974 |
| 11Nov2011 | 15518 | 487.31  | 13.82261 | 2 K.KRADTLL chr4@1835   | 4.83E-10 | 0.006162 |
| 11Nov2011 | 19755 | 1022.51 | 24.93645 | 3 R.M+15.99 chr3@7035   | 5.41E-10 | 0.009746 |
| 12Oct2011 | 169   | 597.31  | 9.007417 | 2 K.LSSTSSEL chr1@1417  | 4.30E-11 | 0.001209 |
| 11Nov2011 | 2125  | 459.3   | 10.58789 | 2 K.LAVIIFGG chr5@2666  | 3.05E-10 | 0.005393 |
| 11Nov2011 | 3364  | 457.27  | 2.345949 | 2 K.KNSKNPP chr3@1222   | 4.23E-10 | 0.009167 |
| 11Nov2011 | 27723 | 892.49  | 7.329341 | 3 K.DINLQAS chr4@5366   | 3.39E-10 | 0.006829 |
| 11Nov2011 | 23568 | 1217.15 | 6.753935 | 2 K.WNSKILS chr2@7514   | 1.87E-10 | 0.004907 |
| 11Nov2011 | 7742  | 463.24  | -2.31077 | 2 K.NTFSNKS chr2@1168   | 4.13E-10 | 0.00841  |
| 12Oct2011 | 10849 | 990.03  | -9.87392 | 2 R.FVYIYELI chr1@1475  | 2.31E-10 | 0.006464 |
| 12Oct2011 | 2435  | 957.6   | 1.595122 | 1 R.KIVDLLEK Splice@chr | 3.31E-10 | 0.006792 |
| 12Oct2011 | 12281 | 1117.58 | -19.112  | 2 R.EK+14.01 chr3@7236  | 3.80E-11 | 0.001165 |
| 11Nov2011 | 17160 | 804.43  | 7.032906 | 2 K.DEK+14.0 Splice@chr | 8.76E-11 | 0.00212  |
| 11Nov2011 | 5293  | 537.79  | 20.1263  | 2 K.ELGTMKL chrX@1554   | 3.81E-10 | 0.00635  |
| 11Nov2011 | 8623  | 489.93  | 12.65022 | 3 A.LILDFCSL chr5@1768  | 4.46E-10 | 0.007715 |
| 11Nov2011 | 33180 | 1077.24 | 19.6862  | 3 _GTVRRCP chr5@4155    | 6.40E-11 | 0.001504 |
| 11Nov2011 | 24767 | 1231.64 | -6.84428 | 2 M.K+14.01 Splice@chr  | 8.80E-11 | 0.002606 |
| 12Oct2011 | 247   | 729.39  | -12.7021 | 2 K.LYLQNK+ chr5@1222   | 3.46E-10 | 0.004293 |
| 11Nov2011 | 35064 | 1114.11 | -13.5985 | 2 R.NIM+15.0 Splice@chr | 8.17E-11 | 0.001715 |
| 11Nov2011 | 307   | 1010.45 | -19.3482 | 1 K.HNVPDD chr3@2895    | 2.86E-10 | 0.005842 |
| 12Oct2011 | 2581  | 769.4   | -21.5781 | 2 R.RSFK+14.0 chr4@8857 | 2.53E-10 | 0.004893 |
| 12Oct2011 | 6241  | 794.01  | -27.7621 | 2 R.K+14.016 Splice@chr | 3.45E-11 | 0.00263  |
| 12Oct2011 | 5723  | 700.36  | -15.5005 | 2 K.FEK+14.0 Splice@chr | 3.44E-10 | 0.008472 |
| 12Oct2011 | 11839 | 1110.88 | -18.6239 | 3 L.TLMTYPP Splice@chr  | 3.06E-10 | 0.009555 |
| 11Nov2011 | 5220  | 855.47  | -24.9288 | 1 R.TSRRRAHK chr3@9617  | 4.54E-10 | 0.0093   |
| 11Nov2011 | 5310  | 855.48  | -13.2144 | 1 R.TSRRRAHK chr3@9617  | 4.53E-10 | 0.008389 |
| 11Nov2011 | 4807  | 855.48  | -13.2144 | 1 R.TSRRRAHK chr3@9617  | 4.80E-10 | 0.007565 |
| 11Nov2011 | 5019  | 855.47  | -24.9288 | 1 R.TSRRRAHK chr3@9617  | 3.99E-10 | 0.008965 |
| 11Nov2011 | 30709 | 1114.62 | -13.8115 | 2 R.KCAPILR chr5@1765   | 5.18E-10 | 0.008274 |
| 12Oct2011 | 2254  | 624.79  | 20.05902 | 2 K.TYMYNY chrX@6285    | 3.29E-10 | 0.009005 |
| 11Nov2011 | 23814 | 737     | 18.90819 | 3 _ECGEAES chr2@1452    | 4.70E-10 | 0.009791 |
| 11Nov2011 | 33119 | 986.04  | -3.59382 | 2 K.K+14.016 chr2@1222  | 9.93E-11 | 0.002348 |
| 11Nov2011 | 32129 | 909.19  | -16.4876 | 3 K.KMAKTN chr1@2850    | 2.47E-10 | 0.005291 |
| 11Nov2011 | 1754  | 605.32  | 18.6187  | 1 K.GGGGGA chr1@1496    | 6.93E-11 | 0.001845 |
| 11Nov2011 | 33063 | 1066.55 | -26.2166 | 2 R.QKKRPV chr3@2814    | 1.35E-10 | 0.003446 |
| 11Nov2011 | 21831 | 917.53  | -28.6826 | 2 K.FK+14.01 chr5@1868  | 4.95E-10 | 0.00984  |
| 11Nov2011 | 3499  | 459.26  | -13.8645 | 2 R.KVSNGLC chr1@1265   | 1.07E-10 | 0.002682 |
| 11Nov2011 | 9     | 861.47  | 2.127994 | 1 K.KEKAEK chr5@4454    | 3.54E-10 | 0.006339 |

|           |       |         |          |                          |          |          |
|-----------|-------|---------|----------|--------------------------|----------|----------|
| 12Oct2011 | 8312  | 838.53  | 13.48222 | 2 K.IILIRTKK+ chr5@1905  | 9.59E-11 | 0.002201 |
| 11Nov2011 | 27978 | 920.52  | -17.1666 | 2 _..KNKYIITY Splice@chr | 2.90E-10 | 0.00523  |
| 12Oct2011 | 10752 | 1055.08 | 3.5059   | 2 N.RKFHVIFl chr5@2015   | 5.47E-11 | 0.001493 |
| 11Nov2011 | 27893 | 927.14  | 26.54231 | 2 R.RDRTRIVl chr1@7306   | 4.00E-10 | 0.006989 |
| 12Oct2011 | 10416 | 753.09  | -28.3493 | 3 _..TKKLLNL chrX@1500   | 2.74E-10 | 0.00852  |
| 12Oct2011 | 9138  | 833.93  | -6.74156 | 2 R.FDLQKMI chr1@5020    | 1.51E-10 | 0.003901 |
| 12Oct2011 | 6542  | 516.62  | -18.6239 | 3 R.PLKILGGC chrX@3311   | 2.65E-10 | 0.006294 |
| 11Nov2011 | 25912 | 986.04  | -19.0618 | 2 _..FFK+14.0 chrX@8921  | 1.07E-10 | 0.001716 |
| 11Nov2011 | 25175 | 663.35  | 4.976152 | 2 K.KM+15.9 Splice@chr   | 5.12E-10 | 0.006326 |
| 12Oct2011 | 2143  | 859.93  | -17.6937 | 2 _..RAADGIF chr1@7339   | 7.63E-12 | 2.34E-04 |
| 12Oct2011 | 10662 | 824.8   | 25.38898 | 3 R.NK+14.0 chr2@2557    | 4.01E-10 | 0.009135 |
| 12Oct2011 | 7673  | 671.43  | 17.63132 | 2 K.RK+14.01 chrX@5179   | 1.09E-10 | 0.00335  |
| 12Oct2011 | 528   | 556.78  | -23.3555 | 2 K.QDAPK+1 chr4@1288    | 3.77E-10 | 0.004972 |
| 11Nov2011 | 8939  | 984.53  | -26.7898 | 2 K.KQYQRA\ chrX@3787    | 3.66E-12 | 6.61E-05 |
| 11Nov2011 | 9014  | 984.53  | -26.7898 | 2 K.KQYQRA\ chrX@3787    | 3.43E-10 | 0.006576 |
| 11Nov2011 | 25561 | 1235.17 | 27.53438 | 2 R.VFGAFPK Splice@chr   | 2.10E-10 | 0.005089 |
| 12Oct2011 | 9809  | 745.47  | 11.61036 | 2 L.PM+15.9 Splice@chr   | 3.92E-11 | 0.001256 |
| 12Oct2011 | 1593  | 616.31  | 27.15457 | 2 R.ERGNIFSI chr2@4385   | 1.15E-10 | 0.003095 |
| 12Oct2011 | 7673  | 763.4   | 27.47344 | 3 K.FTDICLVF chr4@1148   | 5.80E-10 | 0.008708 |
| 12Oct2011 | 4753  | 474.25  | 24.03555 | 4 K.SPGISSPA chrX@1405   | 3.77E-10 | 0.007159 |
| 12Oct2011 | 6029  | 710.96  | -18.2255 | 2 R.K+14.016 chr5@2009   | 3.77E-10 | 0.008769 |
| 11Nov2011 | 32778 | 1214.68 | 12.40256 | 2 K.VKLRCKN Splice@chr   | 4.92E-10 | 0.009896 |
| 11Nov2011 | 32539 | 1214.7  | 28.80397 | 2 K.VKLRCKN Splice@chr   | 5.26E-10 | 0.009603 |
| 11Nov2011 | 1823  | 586.29  | 1.042834 | 2 R.IDLIDFLC chr5@4280   | 3.74E-10 | 0.008527 |
| 12Oct2011 | 9575  | 1044.08 | -29.4906 | 2 R.VWEM+1 chr4@6898     | 3.80E-10 | 0.007159 |
| 11Nov2011 | 33902 | 883.02  | 8.413861 | 2 R.TFIPK+14 chr3@1036   | 1.02E-10 | 0.002142 |
| 12Oct2011 | 9959  | 896.5   | -24.0675 | 3 K.WRK+14. chr5@5291    | 2.96E-10 | 0.004293 |
| 11Nov2011 | 30852 | 1094.12 | -4.3552  | 2 K.KWWQK- chr5@2045     | 4.40E-10 | 0.009128 |
| 12Oct2011 | 1845  | 474.26  | 29.34145 | 2 R.KVDNCRF chrX@6265    | 1.63E-10 | 0.004903 |
| 11Nov2011 | 32579 | 1230.64 | -24.2222 | 2 R.DLSCELN\ chr4@8615   | 4.40E-10 | 0.007317 |
| 11Nov2011 | 28488 | 986.51  | -20.4778 | 2 Q.KSFSENL chr5@1985    | 4.48E-10 | 0.007469 |
| 11Nov2011 | 10217 | 944.51  | 24.75884 | 2 R.K+14.016 chr2@1675   | 1.75E-10 | 0.003843 |
| 11Nov2011 | 3579  | 469.23  | 11.60174 | 2 K.TKSANCE Splice@chr   | 2.70E-10 | 0.004873 |
| 11Nov2011 | 23248 | 1148.57 | -28.0666 | 2 C.PCKFLPAI chrX@1517   | 1.32E-11 | 3.28E-04 |
| 11Nov2011 | 469   | 515.32  | 6.951306 | 2 K.SLAKAAS chr4@1105    | 1.49E-10 | 0.00269  |
| 11Nov2011 | 493   | 515.32  | 6.951306 | 2 K.SLAKAAS chr4@1105    | 1.96E-10 | 0.004961 |
| 11Nov2011 | 35006 | 1215.67 | 23.51693 | 1 R.LVNDFV chr2@1027     | 1.21E-10 | 0.002502 |
| 12Oct2011 | 8441  | 1024.15 | 27.36686 | 2 K.NEQKPEL chr4@1231    | 6.37E-11 | 0.001952 |
| 11Nov2011 | 2156  | 570.79  | 6.320129 | 2 _..LTRSSEY Splice@chr  | 4.32E-10 | 0.009536 |
| 11Nov2011 | 33871 | 951.52  | -4.33551 | 2 R.RQRSIHH Splice@chr   | 2.19E-10 | 0.004212 |
| 11Nov2011 | 33449 | 791.37  | -17.7811 | 1 K.TGDGERF chr2@4875    | 1.12E-10 | 0.002479 |
| 11Nov2011 | 13730 | 1065.51 | 6.137676 | 3 _..GGTKLSM Splice@chr  | 1.47E-10 | 0.004157 |
| 11Nov2011 | 14440 | 663.85  | 16.91156 | 2 K.IEIEAYISE chrX@9246  | 3.15E-10 | 0.008386 |
| 12Oct2011 | 3549  | 633     | -6.98817 | 3 K.LKFENVQ chr5@9151    | 1.24E-10 | 0.002642 |
| 11Nov2011 | 27468 | 766.63  | 17.32578 | 4 _..QK+14.0 Splice@chr  | 3.74E-10 | 0.006677 |
| 11Nov2011 | 23189 | 879.47  | -9.76614 | 2 K.NEANNIC Splice@chr   | 4.21E-10 | 0.009475 |
| 11Nov2011 | 31116 | 1305.67 | -8.60788 | 2 K.IHEYRFVI chr4@6799   | 5.02E-11 | 0.001251 |

|           |       |         |          |                        |          |          |
|-----------|-------|---------|----------|------------------------|----------|----------|
| 11Nov2011 | 28529 | 1305.66 | -16.2801 | 2 K.IHEYRFVI chr4@6795 | 5.40E-10 | 0.009922 |
| 12Oct2011 | 2785  | 449.59  | -16.474  | 3 K.TLPETFK+ chr5@1578 | 1.08E-10 | 0.003372 |
| 11Nov2011 | 17098 | 733.39  | 6.047638 | 2 K.QTPQTHI chrX@7286  | 1.62E-11 | 3.80E-04 |
| 11Nov2011 | 30063 | 953.5   | -22.0213 | 2 K.NFGNKKI Splice@chr | 4.12E-10 | 0.007412 |
| 11Nov2011 | 23845 | 1074.17 | -19.0957 | 3 R.QLVVM+ Splice@chr  | 1.99E-16 | 0        |
| 11Nov2011 | 23882 | 1074.18 | -9.84143 | 3 R.QLVVM+ Splice@chr  | 5.76E-18 | 0        |
| 11Nov2011 | 36995 | 1074.18 | -9.84143 | 3 R.QLVVM+ Splice@chr  | 3.61E-16 | 0        |
| 11Nov2011 | 36915 | 1074.17 | -19.0957 | 3 R.QLVVM+ Splice@chr  | 3.93E-15 | 0        |
| 11Nov2011 | 26482 | 1074.18 | -9.84143 | 3 R.QLVVM+ Splice@chr  | 6.54E-13 | 6.55E-05 |
| 11Nov2011 | 37841 | 1074.18 | -9.84143 | 3 R.QLVVM+ Splice@chr  | 1.73E-16 | 0        |
| 11Nov2011 | 36953 | 1074.17 | -19.0957 | 3 R.QLVVM+ Splice@chr  | 1.76E-16 | 0        |
| 11Nov2011 | 37101 | 1074.17 | -19.0957 | 3 R.QLVVM+ Splice@chr  | 8.85E-15 | 0        |
| 11Nov2011 | 36835 | 1074.18 | -9.84143 | 3 R.QLVVM+ Splice@chr  | 7.43E-13 | 6.55E-05 |
| 11Nov2011 | 35830 | 1074.17 | -19.0957 | 3 R.QLVVM+ Splice@chr  | 5.17E-15 | 0        |
| 11Nov2011 | 36703 | 1074.18 | -9.84143 | 3 R.QLVVM+ Splice@chr  | 4.05E-17 | 0        |
| 11Nov2011 | 36722 | 1074.18 | -9.84143 | 3 R.QLVVM+ Splice@chr  | 2.89E-18 | 0        |
| 11Nov2011 | 36822 | 1074.17 | -19.0957 | 3 R.QLVVM+ Splice@chr  | 6.55E-12 | 6.61E-05 |
| 11Nov2011 | 35914 | 1074.18 | -9.84143 | 3 R.QLVVM+ Splice@chr  | 1.20E-15 | 0        |
| 11Nov2011 | 36775 | 1074.18 | -9.84143 | 3 R.QLVVM+ Splice@chr  | 1.13E-17 | 0        |
| 11Nov2011 | 35867 | 1074.18 | -9.84143 | 3 R.QLVVM+ Splice@chr  | 6.61E-17 | 0        |
| 11Nov2011 | 36034 | 1074.19 | -0.5872  | 3 R.QLVVM+ Splice@chr  | 1.59E-14 | 0        |
| 11Nov2011 | 36377 | 1074.17 | -19.0957 | 3 R.QLVVM+ Splice@chr  | 8.75E-15 | 0        |
| 11Nov2011 | 37098 | 1074.18 | -9.84143 | 3 R.QLVVM+ Splice@chr  | 3.40E-17 | 0        |
| 11Nov2011 | 37125 | 1074.18 | -9.84143 | 3 R.QLVVM+ Splice@chr  | 6.26E-17 | 0        |
| 11Nov2011 | 36297 | 1074.16 | -28.5016 | 3 R.QLVVM+ Splice@chr  | 1.15E-15 | 0        |
| 11Nov2011 | 34811 | 1074.16 | -28.5016 | 3 R.QLVVM+ Splice@chr  | 9.70E-12 | 1.94E-04 |
| 11Nov2011 | 36253 | 1074.18 | -9.84143 | 3 R.QLVVM+ Splice@chr  | 9.42E-14 | 6.95E-05 |
| 11Nov2011 | 35555 | 1074.19 | -0.5872  | 3 R.QLVVM+ Splice@chr  | 6.06E-11 | 0.001487 |
| 11Nov2011 | 34625 | 1074.17 | -19.0957 | 3 R.QLVVM+ Splice@chr  | 2.46E-17 | 0        |
| 11Nov2011 | 35489 | 1074.18 | -9.84143 | 3 R.QLVVM+ Splice@chr  | 1.40E-14 | 0        |
| 11Nov2011 | 35516 | 1074.18 | -9.84143 | 3 R.QLVVM+ Splice@chr  | 1.81E-14 | 0        |
| 11Nov2011 | 35548 | 1074.17 | -19.0957 | 3 R.QLVVM+ Splice@chr  | 3.18E-14 | 0        |
| 11Nov2011 | 26109 | 1074.18 | -9.84143 | 3 R.QLVVM+ Splice@chr  | 2.93E-14 | 0        |
| 11Nov2011 | 29032 | 1046.87 | -13.7567 | 3 K.CALFDK+ chrX@7105  | 1.56E-10 | 0.001876 |
| 11Nov2011 | 33155 | 854.45  | -9.62327 | 2 R.FDTWKH chrX@1147   | 4.19E-10 | 0.008137 |
| 11Nov2011 | 3605  | 1009.46 | -20.8197 | 1 K.MVTCNEI chr4@1505  | 2.92E-10 | 0.008801 |
| 11Nov2011 | 1793  | 610.8   | -26.3234 | 2 _SRKMVM chr3@4128    | 3.58E-10 | 0.007143 |
| 11Nov2011 | 1782  | 610.8   | -26.3234 | 2 _SRKMVM chr3@4128    | 5.37E-10 | 0.008601 |
| 11Nov2011 | 19289 | 791.9   | -15.2799 | 2 F.QFM+15. chr4@1546  | 2.60E-10 | 0.006856 |
| 11Nov2011 | 24323 | 791.9   | -15.2799 | 2 F.QFM+15. chr4@1546  | 3.52E-11 | 8.35E-04 |
| 11Nov2011 | 23915 | 792.4   | -17.4008 | 2 F.QFM+15. chr4@1546  | 2.55E-10 | 0.004929 |
| 11Nov2011 | 24241 | 791.9   | -15.2799 | 2 F.QFM+15. chr4@1546  | 6.27E-11 | 0.001892 |
| 11Nov2011 | 17444 | 1313.64 | -9.27905 | 2 K.TDDAPAE Splice@chr | 1.23E-10 | 0.002737 |
| 11Nov2011 | 17428 | 875.76  | -10.9777 | 3 K.TDDAPAE Splice@chr | 3.33E-10 | 0.006615 |
| 11Nov2011 | 17484 | 876.1   | -4.72052 | 3 K.TDDAPAE Splice@chr | 1.27E-13 | 6.95E-05 |
| 11Nov2011 | 31272 | 1189.57 | -22.6971 | 2 K.EHK+14.( chr4@9995 | 4.52E-11 | 9.41E-04 |
| 11Nov2011 | 8463  | 859.4   | -11.9568 | 1 K.AHSSAET chr2@1404  | 1.89E-10 | 0.005487 |

|           |       |         |          |                         |          |          |
|-----------|-------|---------|----------|-------------------------|----------|----------|
| 11Nov2011 | 24984 | 1141.57 | 2.889723 | 2 R.SK+14.01 chrX@4016  | 4.05E-10 | 0.007338 |
| 11Nov2011 | 22801 | 1001.5  | 5.612504 | 1 K.YSSQEIFK chr3@1295  | 3.43E-10 | 0.008343 |
| 11Nov2011 | 552   | 553.27  | 0.278492 | 2 A.NDLSSAN chrX@1431   | 2.19E-10 | 0.004979 |
| 12Oct2011 | 7048  | 1049.83 | -20.7032 | 3 G.DDAGAI\ chr2@1338   | 3.93E-10 | 0.008758 |
| 11Nov2011 | 29513 | 933.44  | -29.4372 | 2 R.M+15.99 chr1@1115   | 1.90E-10 | 0.003505 |
| 11Nov2011 | 21578 | 569.29  | 18.68846 | 2 K.KNM+15. chr2@1484   | 9.69E-11 | 0.002208 |
| 11Nov2011 | 35792 | 871.46  | 0.070119 | 4 K.PEPKPEPI chr5@1825  | 2.42E-10 | 0.00512  |
| 11Nov2011 | 28360 | 871.46  | 0.070119 | 4 K.PEPKPEPI chr5@1825  | 3.98E-10 | 0.007223 |
| 11Nov2011 | 24727 | 941.01  | 14.78102 | 2 R.QNSLRQI chrX@4884   | 6.99E-11 | 0.001385 |
| 11Nov2011 | 2124  | 533.76  | 0.976743 | 2 G.FGGGGIS chr2@5085   | 1.61E-10 | 0.003959 |
| 11Nov2011 | 2145  | 533.75  | -17.8298 | 2 G.FGGGGIS chr2@5085   | 1.88E-10 | 0.004907 |
| 12Oct2011 | 909   | 533.76  | 0.976743 | 2 G.FGGGGIS chr2@5085   | 9.01E-11 | 0.002201 |
| 12Oct2011 | 8797  | 507.3   | -15.0287 | 3 _IK+14.01 chr2@1082   | 2.38E-10 | 0.005303 |
| 11Nov2011 | 11687 | 430.23  | -19.8571 | 2 R.GKRGGG chr1@5306    | 4.93E-10 | 0.008286 |
| 11Nov2011 | 33077 | 1034.57 | 10.81104 | 3 K.LRK+14.0 chr4@3034  | 2.93E-10 | 0.004277 |
| 12Oct2011 | 11094 | 472.76  | -9.41615 | 4 K.HLLCSKIK chr2@4975  | 4.73E-10 | 0.009946 |
| 12Oct2011 | 2530  | 424.24  | -9.13334 | 3 K.KNAEIAK Splice@chr  | 4.21E-10 | 0.009784 |
| 11Nov2011 | 13630 | 935.98  | -1.56672 | 2 K.KEENYQV Splice@chr  | 5.89E-12 | 1.23E-04 |
| 11Nov2011 | 13290 | 936.49  | 7.345157 | 2 K.KEENYQV Splice@chr  | 9.87E-11 | 0.002968 |
| 11Nov2011 | 13293 | 935.99  | 9.139212 | 2 K.KEENYQV Splice@chr  | 4.99E-11 | 0.001757 |
| 11Nov2011 | 14172 | 935.98  | -1.56672 | 2 K.KEENYQV Splice@chr  | 1.24E-11 | 4.41E-04 |
| 11Nov2011 | 14117 | 936.48  | -3.36078 | 2 K.KEENYQV Splice@chr  | 7.71E-11 | 0.002355 |
| 11Nov2011 | 13467 | 935.98  | -1.56672 | 2 K.KEENYQV Splice@chr  | 1.49E-12 | 1.42E-04 |
| 11Nov2011 | 13410 | 936.49  | 7.345157 | 2 K.KEENYQV Splice@chr  | 3.31E-11 | 7.13E-04 |
| 11Nov2011 | 13412 | 935.98  | -1.56672 | 2 K.KEENYQV Splice@chr  | 2.68E-12 | 4.03E-04 |
| 11Nov2011 | 875   | 633.37  | 27.96701 | 2 K.M+15.99 chr2@1354   | 9.98E-11 | 0.002183 |
| 11Nov2011 | 702   | 633.34  | -19.4629 | 2 K.M+15.99 chr2@1354   | 3.09E-11 | 7.13E-04 |
| 12Oct2011 | 2690  | 650.35  | 21.68481 | 2 K.NFNKKYC chr2@1741   | 9.12E-11 | 0.001667 |
| 11Nov2011 | 28963 | 779.96  | -0.9787  | 2 _EVSLTLVK Splice@chr  | 4.66E-10 | 0.008536 |
| 11Nov2011 | 22752 | 779.96  | -0.9787  | 2 _EVSLTLVK Splice@chr  | 4.29E-10 | 0.009357 |
| 12Oct2011 | 9682  | 872.49  | -23.1585 | 2 R.VSCAEAK Splice@chr  | 3.38E-11 | 6.12E-04 |
| 11Nov2011 | 24559 | 1184.6  | -27.315  | 2 R.QYADLPE chr3@1197   | 4.37E-10 | 0.00842  |
| 11Nov2011 | 25237 | 1001.5  | -12.8109 | 4 R.WVSPRIL chr4@2234   | 3.59E-10 | 0.008131 |
| 11Nov2011 | 28996 | 928.16  | -17.6423 | 3 K.EK+14.01 chr4@1145  | 2.42E-10 | 0.004407 |
| 11Nov2011 | 18567 | 806.91  | -16.3295 | 2 K.SK+14.01 chr5@1777  | 3.71E-10 | 0.009929 |
| 11Nov2011 | 21875 | 1378.7  | -27.7069 | 1 K.LTISQCQI Splice@chr | 3.27E-10 | 0.006762 |
| 11Nov2011 | 30013 | 1236.61 | 21.93279 | 1 R.ITRCSESN chr5@1230  | 2.86E-10 | 0.005132 |
| 11Nov2011 | 25245 | 756.73  | 7.784719 | 3 K.NQVCSTF chrX@5077   | 7.50E-11 | 9.57E-04 |
| 12Oct2011 | 1095  | 454.23  | -5.72739 | 2 R.AMDVLN chr1@2717    | 2.59E-10 | 0.004378 |
| 12Oct2011 | 9648  | 529.64  | -26.9168 | 3 R.RMK+14. chr5@6765   | 3.87E-10 | 0.005432 |
| 11Nov2011 | 28424 | 1151.62 | 24.01521 | 2 K.M+15.99 Splice@chr  | 5.03E-10 | 0.008213 |
| 11Nov2011 | 26686 | 954.49  | -4.28885 | 2 K.YTYNSDK chr4@5299   | 1.80E-10 | 0.004025 |
| 11Nov2011 | 14339 | 547.34  | -18.7277 | 2 R.KSIFSAK+ chr4@2926  | 3.03E-10 | 0.006531 |
| 11Nov2011 | 10790 | 765.99  | -28.8499 | 5 R.ENSCKTD chrX@1597   | 2.24E-10 | 0.006186 |
| 11Nov2011 | 17530 | 1117.61 | -27.845  | 1 K.NIILSSLSI chr1@7514 | 2.79E-10 | 0.006097 |
| 11Nov2011 | 3714  | 683.35  | -26.2975 | 2 R.KINFNNN chr2@1355   | 4.49E-10 | 0.008707 |
| 12Oct2011 | 6138  | 665.01  | -18.2611 | 3 K.AWVKNS chr4@8994    | 4.99E-10 | 0.00694  |

|           |       |         |          |                         |          |          |
|-----------|-------|---------|----------|-------------------------|----------|----------|
| 11Nov2011 | 20270 | 719.72  | -28.0642 | 3 K.RGRTVGS chr5@1585   | 5.24E-10 | 0.009776 |
| 12Oct2011 | 6099  | 617.99  | 27.76581 | 3 K.QNEKQL\ Splice@chr  | 1.24E-10 | 0.003372 |
| 12Oct2011 | 5798  | 618.32  | 20.54522 | 3 K.QNEKQL\ Splice@chr  | 2.83E-10 | 0.007331 |
| 12Oct2011 | 346   | 473.28  | 10.54642 | 2 K.KNGRTA\ chr4@1645   | 1.34E-10 | 0.002187 |
| 12Oct2011 | 10727 | 791.93  | 14.37828 | 4 K.KYWSSSTF chr3@9070  | 1.32E-10 | 0.003378 |
| 11Nov2011 | 11055 | 622.35  | 1.0478   | 3 K.IDKTLLHE chr5@8427  | 4.26E-10 | 0.008904 |
| 12Oct2011 | 5116  | 506.25  | -11.9945 | 4 R.RAM+15. chr2@1435   | 1.97E-10 | 0.005097 |
| 12Oct2011 | 11463 | 762.74  | -3.09823 | 3 K.MSHPHFI chrX@1076   | 9.77E-11 | 0.00311  |
| 11Nov2011 | 18493 | 1359.65 | 1.527406 | 1 K.SSRDFGV Splice@chr  | 3.29E-11 | 8.35E-04 |
| 12Oct2011 | 8657  | 1142.6  | 3.557935 | 2 K.SVEADNF Splice@chr  | 1.64E-10 | 0.003804 |
| 11Nov2011 | 17017 | 808.93  | -6.19472 | 2 K.NFVPGN\ chr5@1371   | 3.73E-10 | 0.007885 |
| 11Nov2011 | 8168  | 844.48  | -24.4577 | 2 \_K+14.016 chr2@2410  | 2.87E-10 | 0.005589 |
| 11Nov2011 | 8074  | 844.48  | -24.4577 | 2 \_K+14.016 chr2@2410  | 4.20E-10 | 0.008137 |
| 12Oct2011 | 9785  | 1117.11 | -5.24983 | 2 K.NFVVGD\ Splice@chr  | 3.35E-10 | 0.009555 |
| 11Nov2011 | 2774  | 584.81  | -24.5351 | 2 S.GTASSPG Splice@chr  | 2.22E-10 | 0.004638 |
| 11Nov2011 | 32995 | 1338.18 | 5.137813 | 2 K.FLLTFM+ chr1@9745   | 5.55E-10 | 0.009151 |
| 11Nov2011 | 15749 | 614.85  | 15.61097 | 2 \_EVSILWA chr2@1405   | 4.10E-10 | 0.008367 |
| 11Nov2011 | 3398  | 917.47  | 7.202935 | 1 K.NGSGSPK Splice@chr  | 3.80E-10 | 0.008913 |
| 11Nov2011 | 27945 | 942.44  | -16.5319 | 2 K.CLSPGEN chr2@1155   | 1.30E-10 | 0.002651 |
| 12Oct2011 | 2133  | 604.31  | -27.1124 | 2 R.RSRTFQV chr2@1017   | 1.46E-10 | 0.003901 |
| 12Oct2011 | 7946  | 1043.02 | -16.8469 | 2 K.IGNFCAF\ chr2@1425  | 1.85E-10 | 0.002992 |
| 11Nov2011 | 21542 | 1015.49 | -15.3782 | 2 R.WAVFM+ Splice@chr   | 3.24E-10 | 0.008578 |
| 11Nov2011 | 16703 | 652.86  | -10.259  | 2 D.K+14.016 chr2@9714  | 4.19E-10 | 0.00911  |
| 12Oct2011 | 8387  | 689.43  | -9.66745 | 3 R.MKKMRK chr2@6785    | 2.38E-10 | 0.006419 |
| 11Nov2011 | 8309  | 1117.56 | -17.6701 | 1 R.KAEFFLM chrX@1154   | 2.12E-10 | 0.006312 |
| 11Nov2011 | 6920  | 553.33  | 10.71924 | 2 K.KLSTERM chr4@3362   | 4.28E-10 | 0.0072   |
| 12Oct2011 | 9368  | 809.41  | -9.64197 | 3 \_WYRINVS chr2@1467   | 1.02E-10 | 0.002233 |
| 12Oct2011 | 6958  | 650.99  | -20.9496 | 3 K.M+15.99 chr5@1361   | 7.56E-11 | 7.93E-04 |
| 11Nov2011 | 28452 | 801.41  | 20.79446 | 2 K.FEWELM\ chr3@3425   | 4.11E-10 | 0.006929 |
| 11Nov2011 | 31729 | 1250.7  | -18.0525 | 2 R.RFWK+14 chr4@3695   | 2.14E-10 | 0.00418  |
| 11Nov2011 | 25396 | 927.5   | -18.3554 | 2 \_WK+14.0 chrX@1006   | 2.66E-10 | 0.004806 |
| 11Nov2011 | 29004 | 1162.12 | 8.441505 | 2 K.YLGAYLL\ Splice@chr | 7.83E-22 | 0        |
| 11Nov2011 | 28729 | 1161.63 | 18.51143 | 2 K.YLGAYLL\ Splice@chr | 1.02E-18 | 0        |
| 11Nov2011 | 36742 | 1216.5  | 0.45407  | 1 K.FACECCQ chrX@9425   | 3.08E-11 | 6.71E-04 |
| 12Oct2011 | 3179  | 472.29  | -24.8245 | 2 R.ARK+14.0 Splice@chr | 2.40E-10 | 0.005442 |
| 11Nov2011 | 9686  | 549.29  | -4.9723  | 3 G.FPQLISLL chr4@4444  | 1.50E-10 | 0.003585 |
| 11Nov2011 | 31662 | 879.81  | -9.81588 | 3 R.GQVTFEL Splice@chr  | 8.32E-11 | 0.002086 |
| 12Oct2011 | 5691  | 446.74  | -28.2366 | 2 R.FGNAIIEK Splice@chr | 3.67E-10 | 0.006666 |
| 12Oct2011 | 7374  | 825.9   | 19.75617 | 2 K.MTRMFN chrX@1458    | 2.01E-10 | 0.004131 |
| 12Oct2011 | 1800  | 969.55  | -9.70461 | 1 R.SSLHTRIR chr5@1887  | 3.43E-10 | 0.007256 |
| 12Oct2011 | 10235 | 985.12  | -17.2828 | 3 K.WDSTHS\ chr5@1285   | 3.34E-10 | 0.009377 |
| 11Nov2011 | 28143 | 807.46  | 9.011046 | 3 R.YK+14.01 chr4@4585  | 1.37E-10 | 0.002313 |
| 12Oct2011 | 9967  | 934.81  | -20.3773 | 3 K.LDYHTKI\ chr5@4697  | 3.24E-10 | 0.004293 |
| 11Nov2011 | 20844 | 946.96  | -28.4998 | 2 \_MIEFETR\ Splice@chr | 4.78E-10 | 0.009491 |
| 11Nov2011 | 20954 | 946.96  | -28.4998 | 2 \_MIEFETR\ Splice@chr | 1.91E-10 | 0.003505 |
| 11Nov2011 | 20646 | 946.96  | -28.4998 | 2 \_MIEFETR\ Splice@chr | 3.93E-10 | 0.006435 |
| 11Nov2011 | 20826 | 946.96  | -28.4998 | 2 \_MIEFETR\ Splice@chr | 3.73E-10 | 0.006898 |

|           |       |         |          |                         |          |          |
|-----------|-------|---------|----------|-------------------------|----------|----------|
| 11Nov2011 | 692   | 456.23  | 24.805   | 2 K.FEVETMF chr3@5627   | 4.46E-10 | 0.008232 |
| 12Oct2011 | 2663  | 803.91  | -5.81766 | 2 R.YLYCFLFK chr2@1050  | 1.98E-10 | 0.004482 |
| 11Nov2011 | 14692 | 728.38  | -0.1949  | 3 R.KYAITYST chr5@3922  | 1.65E-10 | 0.004247 |
| 12Oct2011 | 7333  | 728.39  | 13.46104 | 3 R.KYAITYST chr5@3922  | 4.06E-10 | 0.008931 |
| 11Nov2011 | 7296  | 458.75  | -13.4795 | 2 K.NQTGVG Splice@chr   | 3.39E-10 | 0.008255 |
| 12Oct2011 | 9792  | 792.39  | -9.25489 | 2 K.MICQYFR chr1@9495   | 2.18E-10 | 0.005442 |
| 12Oct2011 | 9100  | 1116.2  | 10.72732 | 2 K.KKIFQKK+ chr5@1935  | 8.64E-11 | 0.001042 |
| 12Oct2011 | 8591  | 630     | -13.1056 | 3 K.TLIEYHIFI chrX@5140 | 9.73E-11 | 0.003095 |
| 12Oct2011 | 9002  | 629.99  | -29.0278 | 3 K.TLIEYHIFI chrX@5140 | 1.64E-10 | 0.004667 |
| 11Nov2011 | 18777 | 608.31  | 14.57302 | 2 K.GNYNGLI Splice@chr  | 9.78E-11 | 0.002605 |
| 11Nov2011 | 19469 | 870.93  | -13.0913 | 2 S.DSDSPRI+ chrX@6954  | 3.62E-10 | 0.009123 |
| 11Nov2011 | 20842 | 1054.54 | 14.32554 | 1 K.YAIKDDN chr2@2504   | 4.46E-10 | 0.007656 |
| 11Nov2011 | 24980 | 745.88  | -23.4078 | 2 R.GWEALG chr5@6235    | 1.52E-10 | 0.003064 |
| 11Nov2011 | 33172 | 999.49  | -27.5679 | 2 R.EKSLEFRS chr4@4935  | 5.56E-10 | 0.008402 |
| 11Nov2011 | 11131 | 1114.52 | -13.9002 | 2 _VCKNTM- chr5@6687    | 3.21E-10 | 0.008159 |
| 11Nov2011 | 14767 | 805.45  | -9.14694 | 2 R.NTCLPLD chr2@1445   | 5.70E-10 | 0.009802 |
| 11Nov2011 | 16969 | 901.11  | 7.391251 | 2 R.K+14.016 chr1@4271  | 4.05E-10 | 0.009358 |
| 11Nov2011 | 17674 | 901.11  | 7.391251 | 2 R.K+14.016 chr1@4271  | 1.73E-10 | 0.004618 |
| 11Nov2011 | 970   | 816.46  | 2.544847 | 1 K.NDVAAAI chr2@2586   | 1.32E-10 | 0.002944 |
| 11Nov2011 | 31924 | 1195.1  | 2.583262 | 2 K.NSNEQM Splice@chr   | 8.23E-15 | 0        |
| 12Oct2011 | 2672  | 553.3   | -24.4227 | 2 _M+15.99 chr4@9075    | 2.80E-10 | 0.006571 |
| 11Nov2011 | 11666 | 423.23  | -17.202  | 2 R.KRGMPEI chrX@2970   | 3.76E-10 | 0.006664 |
| 11Nov2011 | 22862 | 1169.08 | 16.96456 | 2 R.DFRKYTP chr3@7381   | 1.39E-10 | 0.002484 |
| 11Nov2011 | 22826 | 1003.51 | -19.3385 | 2 R.NIKCGKL+ chr1@6375  | 4.83E-10 | 0.009046 |
| 11Nov2011 | 1226  | 633.33  | -15.9857 | 2 K.KFENLNF chr3@2477   | 9.60E-11 | 0.001414 |
| 11Nov2011 | 1203  | 633.33  | -15.9857 | 2 K.KFENLNF chr3@2477   | 3.40E-10 | 0.00706  |
| 11Nov2011 | 32617 | 1024.05 | -26.1722 | 2 K.IKDNLDM chr4@8832   | 5.33E-10 | 0.008945 |
| 11Nov2011 | 31111 | 1146.11 | -6.15799 | 2 S.GNLICK+1 chr2@1675  | 4.99E-10 | 0.008184 |
| 12Oct2011 | 451   | 589.36  | -15.9756 | 2 K.KNSILFSK chr4@5697  | 3.83E-10 | 0.008941 |
| 11Nov2011 | 27615 | 771.89  | 8.392697 | 2 R.NEK+14.0 chr5@1885  | 2.94E-10 | 0.004277 |
| 11Nov2011 | 34101 | 969.79  | -29.5565 | 3 K.AVPFVPI+ Splice@chr | 6.56E-11 | 0.001503 |
| 11Nov2011 | 31922 | 969.79  | -29.5565 | 3 K.AVPFVPI+ Splice@chr | 2.42E-11 | 6.52E-04 |
| 11Nov2011 | 32838 | 969.8   | -19.2209 | 3 K.AVPFVPI+ Splice@chr | 7.96E-12 | 1.37E-04 |
| 11Nov2011 | 32795 | 969.8   | -19.2209 | 3 K.AVPFVPI+ Splice@chr | 2.88E-10 | 0.005657 |
| 11Nov2011 | 19830 | 1094.62 | 29.13398 | 2 R.NWWWWC Splice@chr   | 4.28E-11 | 9.37E-04 |
| 12Oct2011 | 9287  | 916.46  | 11.08799 | 4 K.NFEFFFN chr5@3748   | 9.87E-11 | 0.003095 |
| 11Nov2011 | 33625 | 1111.08 | -29.3601 | 2 K.WTIPKYS chr5@9110   | 2.38E-10 | 0.005603 |
| 11Nov2011 | 17539 | 636.37  | 13.31718 | 2 R.NENGNA chr4@4027    | 2.22E-10 | 0.00504  |
| 11Nov2011 | 31461 | 1215.29 | 10.6866  | 2 F.FK+14.01 chr1@7218  | 5.70E-10 | 0.009306 |
| 12Oct2011 | 3924  | 836.94  | 6.20627  | 2 R.IGENLST+ chr3@8855  | 3.26E-14 | 0        |
| 11Nov2011 | 12476 | 477.3   | -11.9816 | 2 R.LLLSSVPP chr5@1108  | 2.02E-10 | 0.005375 |
| 11Nov2011 | 30995 | 1082.1  | -4.60236 | 2 R.VK+14.01 chr5@1475  | 2.94E-10 | 0.00564  |
| 11Nov2011 | 5786  | 494.59  | 15.74598 | 3 R.ISEENFIN chr4@1251  | 3.77E-10 | 0.006997 |
| 11Nov2011 | 25703 | 893.97  | -9.50075 | 2 K.TK+14.01 chrX@3438  | 4.85E-10 | 0.007727 |
| 11Nov2011 | 9613  | 892.44  | -7.12069 | 1 K.HTMKGY chr2@1776    | 3.34E-10 | 0.008849 |
| 12Oct2011 | 6588  | 1064.62 | 22.49534 | 1 K.KCLTK+1+ Splice@chr | 2.63E-10 | 0.00796  |
| 11Nov2011 | 29058 | 889.48  | 1.099149 | 2 K.NNFTSLFI chr5@8551  | 5.28E-10 | 0.009256 |

|           |       |         |          |                         |          |          |
|-----------|-------|---------|----------|-------------------------|----------|----------|
| 11Nov2011 | 33067 | 1093.55 | -20.4072 | 1 R.NISEIFNN chr2@4110  | 5.50E-10 | 0.009612 |
| 11Nov2011 | 24138 | 1092.55 | 22.03156 | 1 K.NLESKCM Splice@chr  | 1.17E-10 | 0.003482 |
| 11Nov2011 | 33177 | 1114.1  | 6.470439 | 2 R.KSFFSNFI chr2@2568  | 4.64E-10 | 0.007773 |
| 11Nov2011 | 17520 | 859.5   | -16.8936 | 2 K.FLKEIVW chr2@3261   | 2.13E-10 | 0.004918 |
| 11Nov2011 | 29130 | 958.51  | 13.93671 | 2 S.DSGSTIIM chr2@4236  | 1.63E-10 | 0.004339 |
| 11Nov2011 | 26736 | 958.01  | 15.6895  | 2 S.DSGSTIIM chr2@4236  | 5.40E-11 | 0.001019 |
| 11Nov2011 | 26780 | 1082.91 | -3.8179  | 3 K.RTK+14.C Splice@chr | 2.24E-10 | 0.005491 |
| 12Oct2011 | 10542 | 1146.08 | -22.7063 | 2 K.K+14.016 chrX@1725  | 3.46E-10 | 0.009563 |
| 11Nov2011 | 15250 | 716.36  | 6.874775 | 2 R.GALLDSF chr5@1530   | 4.20E-10 | 0.008913 |
| 11Nov2011 | 28861 | 988.51  | 23.8171  | 3 R.CGSLGRR chr2@1462   | 2.60E-10 | 0.00434  |
| 12Oct2011 | 7571  | 783.42  | 4.099487 | 2 S.NEDAFLS Splice@chr  | 3.55E-10 | 0.007574 |
| 12Oct2011 | 245   | 453.75  | 5.864364 | 2 R.SRSSASRI chrX@9105  | 2.20E-10 | 0.004373 |
| 12Oct2011 | 247   | 453.75  | 5.864364 | 2 R.SRSSASRI chrX@9105  | 1.21E-10 | 0.003673 |
| 12Oct2011 | 4887  | 839.92  | -7.20271 | 2 K.YYNLLSEI chr5@8901  | 3.68E-10 | 0.008585 |
| 12Oct2011 | 4232  | 839.92  | -7.20271 | 2 K.YYNLLSEI chr5@8901  | 2.93E-10 | 0.007574 |
| 12Oct2011 | 6351  | 762.38  | -27.6328 | 2 K.KM+15.9 chr1@3075   | 2.31E-10 | 0.005303 |
| 11Nov2011 | 668   | 1080.54 | -14.0214 | 1 K.FAMWPT Splice@chr   | 4.14E-10 | 0.009441 |
| 11Nov2011 | 13861 | 505.58  | -23.7891 | 3 _SIYQRAD' chr2@1205   | 4.84E-10 | 0.0096   |
| 11Nov2011 | 21363 | 634.4   | 24.93173 | 2 L.LLELLPNL chr5@5504  | 1.89E-10 | 0.005215 |
| 11Nov2011 | 18257 | 902.96  | -11.4074 | 2 K.KPHQDHI chr4@1380   | 7.65E-10 | 0.00876  |
| 12Oct2011 | 12649 | 784.39  | -7.91174 | 2 K.MKM+15 chr2@8635    | 3.98E-10 | 0.009111 |
| 11Nov2011 | 20674 | 816.44  | -22.9784 | 2 K.K+14.016 chr1@1245  | 4.24E-10 | 0.008459 |
| 12Oct2011 | 8792  | 678.84  | -4.7508  | 4 K.NTENTGI chr4@3658   | 1.26E-10 | 0.003359 |
| 11Nov2011 | 23876 | 1068.85 | -8.44216 | 3 R.QLVVMG Splice@chr   | 1.04E-20 | 0        |
| 11Nov2011 | 23846 | 1068.51 | -13.5695 | 3 R.QLVVMG Splice@chr   | 7.46E-21 | 0        |
| 11Nov2011 | 23903 | 1068.85 | -8.44216 | 3 R.QLVVMG Splice@chr   | 9.17E-18 | 0        |
| 11Nov2011 | 21442 | 1068.85 | -8.44216 | 3 R.QLVVMG Splice@chr   | 7.47E-21 | 0        |
| 11Nov2011 | 34831 | 1068.85 | -8.44216 | 3 R.QLVVMG Splice@chr   | 3.48E-20 | 0        |
| 11Nov2011 | 31460 | 1068.85 | -8.44216 | 3 R.QLVVMG Splice@chr   | 4.06E-16 | 0        |
| 11Nov2011 | 31598 | 1068.85 | -8.44216 | 3 R.QLVVMG Splice@chr   | 7.27E-18 | 0        |
| 11Nov2011 | 20936 | 1068.85 | -8.44216 | 3 R.QLVVMG Splice@chr   | 3.41E-16 | 0        |
| 11Nov2011 | 31553 | 1068.85 | -8.44216 | 3 R.QLVVMG Splice@chr   | 3.30E-20 | 0        |
| 11Nov2011 | 32762 | 1068.85 | -8.44216 | 3 R.QLVVMG Splice@chr   | 1.07E-18 | 0        |
| 11Nov2011 | 37855 | 1068.85 | -8.44216 | 3 R.QLVVMG Splice@chr   | 1.67E-15 | 0        |
| 11Nov2011 | 36375 | 1068.84 | -17.7426 | 3 R.QLVVMG Splice@chr   | 2.70E-13 | 6.55E-05 |
| 11Nov2011 | 22161 | 1068.84 | -17.7426 | 3 R.QLVVMG Splice@chr   | 5.21E-21 | 0        |
| 11Nov2011 | 37799 | 1068.84 | -17.7426 | 3 R.QLVVMG Splice@chr   | 1.94E-18 | 0        |
| 11Nov2011 | 36945 | 1068.84 | -17.7426 | 3 R.QLVVMG Splice@chr   | 3.77E-19 | 0        |
| 11Nov2011 | 36875 | 1068.84 | -17.7426 | 3 R.QLVVMG Splice@chr   | 2.18E-20 | 0        |
| 11Nov2011 | 37042 | 1068.84 | -17.7426 | 3 R.QLVVMG Splice@chr   | 3.34E-21 | 0        |
| 11Nov2011 | 37776 | 1068.84 | -17.7426 | 3 R.QLVVMG Splice@chr   | 1.70E-20 | 0        |
| 11Nov2011 | 22257 | 1068.84 | -17.7426 | 3 R.QLVVMG Splice@chr   | 9.04E-21 | 0        |
| 11Nov2011 | 36850 | 1068.84 | -17.7426 | 3 R.QLVVMG Splice@chr   | 1.95E-17 | 0        |
| 11Nov2011 | 22105 | 1068.84 | -17.7426 | 3 R.QLVVMG Splice@chr   | 6.56E-20 | 0        |
| 11Nov2011 | 37099 | 1068.84 | -17.7426 | 3 R.QLVVMG Splice@chr   | 1.30E-15 | 0        |
| 11Nov2011 | 36987 | 1068.84 | -17.7426 | 3 R.QLVVMG Splice@chr   | 2.86E-19 | 0        |
| 11Nov2011 | 36906 | 1068.84 | -17.7426 | 3 R.QLVVMG Splice@chr   | 3.31E-19 | 0        |

|           |       |         |          |                       |          |          |
|-----------|-------|---------|----------|-----------------------|----------|----------|
| 11Nov2011 | 37828 | 1068.51 | -13.5695 | 3 R.QLVVMG Splice@chr | 5.50E-19 | 0        |
| 11Nov2011 | 35886 | 1068.85 | -8.44216 | 3 R.QLVVMG Splice@chr | 5.60E-19 | 0        |
| 11Nov2011 | 35692 | 1068.85 | -8.44216 | 3 R.QLVVMG Splice@chr | 1.30E-16 | 0        |
| 11Nov2011 | 35932 | 1068.85 | -8.44216 | 3 R.QLVVMG Splice@chr | 3.80E-20 | 0        |
| 11Nov2011 | 22574 | 1068.85 | -8.44216 | 3 R.QLVVMG Splice@chr | 1.07E-18 | 0        |
| 11Nov2011 | 36726 | 1068.85 | -8.44216 | 3 R.QLVVMG Splice@chr | 1.59E-19 | 0        |
| 11Nov2011 | 22456 | 1068.84 | -17.7426 | 3 R.QLVVMG Splice@chr | 2.23E-20 | 0        |
| 11Nov2011 | 36753 | 1068.85 | -8.44216 | 3 R.QLVVMG Splice@chr | 2.65E-20 | 0        |
| 11Nov2011 | 22273 | 1068.85 | -8.44216 | 3 R.QLVVMG Splice@chr | 4.46E-21 | 0        |
| 11Nov2011 | 22631 | 1068.85 | -8.44216 | 3 R.QLVVMG Splice@chr | 9.21E-21 | 0        |
| 11Nov2011 | 22516 | 1068.51 | -13.5695 | 3 R.QLVVMG Splice@chr | 4.11E-20 | 0        |
| 11Nov2011 | 36046 | 1068.85 | -8.44216 | 3 R.QLVVMG Splice@chr | 5.04E-22 | 0        |
| 11Nov2011 | 35855 | 1068.84 | -17.7426 | 3 R.QLVVMG Splice@chr | 4.91E-19 | 0        |
| 11Nov2011 | 35931 | 1068.51 | -13.5695 | 3 R.QLVVMG Splice@chr | 3.27E-18 | 0        |
| 11Nov2011 | 35807 | 1068.85 | -8.44216 | 3 R.QLVVMG Splice@chr | 6.43E-14 | 0        |
| 11Nov2011 | 33509 | 1068.85 | -8.44216 | 3 R.QLVVMG Splice@chr | 4.69E-19 | 0        |
| 11Nov2011 | 33458 | 1068.85 | -8.44216 | 3 R.QLVVMG Splice@chr | 1.03E-20 | 0        |
| 11Nov2011 | 33545 | 1068.85 | -8.44216 | 3 R.QLVVMG Splice@chr | 4.56E-19 | 0        |
| 11Nov2011 | 21248 | 1068.84 | -17.7426 | 3 R.QLVVMG Splice@chr | 2.14E-16 | 0        |
| 11Nov2011 | 17246 | 1068.85 | -8.44216 | 3 R.QLVVMG Splice@chr | 9.72E-14 | 0        |
| 11Nov2011 | 22327 | 1068.84 | -17.7426 | 3 R.QLVVMG Splice@chr | 4.55E-21 | 0        |
| 11Nov2011 | 36136 | 1068.85 | -8.44216 | 3 R.QLVVMG Splice@chr | 5.46E-18 | 0        |
| 11Nov2011 | 36295 | 1068.85 | -8.44216 | 3 R.QLVVMG Splice@chr | 3.86E-19 | 0        |
| 11Nov2011 | 36343 | 1068.84 | -17.7426 | 3 R.QLVVMG Splice@chr | 1.21E-20 | 0        |
| 11Nov2011 | 36100 | 1068.85 | -8.44216 | 3 R.QLVVMG Splice@chr | 5.93E-16 | 0        |
| 11Nov2011 | 37066 | 1068.85 | -8.44216 | 3 R.QLVVMG Splice@chr | 1.58E-21 | 0        |
| 11Nov2011 | 23546 | 1068.84 | -17.7426 | 3 R.QLVVMG Splice@chr | 2.19E-13 | 6.95E-05 |
| 11Nov2011 | 36168 | 1068.51 | -13.5695 | 3 R.QLVVMG Splice@chr | 4.22E-19 | 0        |
| 11Nov2011 | 35520 | 1068.85 | -8.44216 | 3 R.QLVVMG Splice@chr | 6.70E-16 | 0        |
| 11Nov2011 | 22565 | 1068.84 | -17.7426 | 3 R.QLVVMG Splice@chr | 5.80E-19 | 0        |
| 11Nov2011 | 36207 | 1068.84 | -17.7426 | 3 R.QLVVMG Splice@chr | 1.74E-19 | 0        |
| 11Nov2011 | 22070 | 1068.84 | -17.7426 | 3 R.QLVVMG Splice@chr | 1.16E-18 | 0        |
| 11Nov2011 | 22184 | 1068.84 | -17.7426 | 3 R.QLVVMG Splice@chr | 3.86E-17 | 0        |
| 11Nov2011 | 36250 | 1068.51 | -13.5695 | 3 R.QLVVMG Splice@chr | 1.11E-16 | 0        |
| 11Nov2011 | 36065 | 1068.84 | -17.7426 | 3 R.QLVVMG Splice@chr | 1.59E-17 | 0        |
| 11Nov2011 | 22073 | 1068.84 | -17.7426 | 3 R.QLVVMG Splice@chr | 6.64E-20 | 0        |
| 11Nov2011 | 22292 | 1068.84 | -17.7426 | 3 R.QLVVMG Splice@chr | 9.95E-20 | 0        |
| 11Nov2011 | 34613 | 1068.85 | -8.44216 | 3 R.QLVVMG Splice@chr | 2.15E-19 | 0        |
| 11Nov2011 | 26113 | 1068.85 | -8.44216 | 3 R.QLVVMG Splice@chr | 3.87E-17 | 0        |
| 11Nov2011 | 26249 | 1068.85 | -8.44216 | 3 R.QLVVMG Splice@chr | 9.45E-19 | 0        |
| 11Nov2011 | 29483 | 1068.84 | -17.7426 | 3 R.QLVVMG Splice@chr | 4.84E-15 | 0        |
| 11Nov2011 | 29573 | 1068.84 | -17.7426 | 3 R.QLVVMG Splice@chr | 1.39E-16 | 0        |
| 11Nov2011 | 29511 | 1068.85 | -8.44216 | 3 R.QLVVMG Splice@chr | 2.50E-16 | 0        |
| 11Nov2011 | 29539 | 1068.85 | -8.44216 | 3 R.QLVVMG Splice@chr | 2.67E-18 | 0        |
| 11Nov2011 | 21288 | 1068.84 | -17.7426 | 3 R.QLVVMG Splice@chr | 8.61E-19 | 0        |
| 11Nov2011 | 31953 | 1068.85 | -8.44216 | 3 R.QLVVMG Splice@chr | 1.48E-15 | 0        |
| 11Nov2011 | 20628 | 992.52  | -3.93967 | 1 R.IWNLASN chrX@1101 | 4.88E-10 | 0.009108 |

|           |       |         |          |                         |          |          |
|-----------|-------|---------|----------|-------------------------|----------|----------|
| 11Nov2011 | 22623 | 1364.69 | -23.0944 | 1 R.SVSHTLE\ chr2@4890  | 5.93E-10 | 0.009636 |
| 12Oct2011 | 13191 | 936.85  | 1.936305 | 3 W.TKLVFF\ chr4@1541   | 1.44E-10 | 0.003059 |
| 12Oct2011 | 12329 | 1018.89 | -27.5822 | 3 R.FLLTIEHD chr3@6905  | 6.56E-11 | 0.002195 |
| 11Nov2011 | 25551 | 1148.6  | 12.58494 | 2 K.M+15.99 chr2@1069   | 3.82E-10 | 0.007326 |
| 11Nov2011 | 19179 | 917.98  | -16.9477 | 2 K.QIWKCSS chrX@3854   | 3.70E-10 | 0.008734 |
| 11Nov2011 | 13000 | 739.39  | -23.2367 | 3 K.M+15.99 chr4@1204   | 2.64E-10 | 0.00714  |
| 11Nov2011 | 1100  | 494.3   | -22.5391 | 2 K.VIESVKRF chr4@6475  | 6.10E-10 | 0.00985  |
| 12Oct2011 | 7475  | 738.48  | -18.1247 | 2 R.KKNLAKK chr5@1989   | 2.14E-10 | 0.004731 |
| 12Oct2011 | 6574  | 927.98  | -1.67876 | 2 K.NPRCLNV Splice@chr  | 1.46E-10 | 0.002285 |
| 11Nov2011 | 28904 | 1255.08 | -22.566  | 2 R.SPTM+15 Splice@chr  | 3.41E-10 | 0.006384 |
| 11Nov2011 | 7564  | 880.43  | 15.33845 | 1 R.FQGNTGI chrX@1738   | 3.10E-10 | 0.005848 |
| 11Nov2011 | 31597 | 1182.58 | -26.8501 | 3 N.YK+14.01 chr3@7125  | 3.00E-11 | 4.66E-04 |
| 11Nov2011 | 31648 | 1182.25 | -23.01   | 3 N.YK+14.01 chr3@7125  | 4.10E-11 | 7.17E-04 |
| 11Nov2011 | 17844 | 558.32  | -9.19934 | 2 R.LILNSTAV chrX@1480  | 2.73E-10 | 0.005129 |
| 11Nov2011 | 17744 | 558.32  | -9.19934 | 2 R.LILNSTAV chrX@1480  | 5.46E-10 | 0.008138 |
| 11Nov2011 | 34286 | 839.45  | 5.750909 | 2 K.RNWRPS\ chr5@8310   | 1.18E-10 | 0.002502 |
| 11Nov2011 | 15986 | 1044.08 | -19.0755 | 2 K.NFLKK+1. chr2@9192  | 3.25E-10 | 0.009878 |
| 11Nov2011 | 13051 | 860.43  | -24.6916 | 2 D.RGMRHV\ chr1@3504   | 2.67E-10 | 0.004851 |
| 11Nov2011 | 10978 | 634.32  | 10.79406 | 2 K.QMRMDI Splice@chr   | 1.92E-10 | 0.003939 |
| 11Nov2011 | 34013 | 919.48  | 19.20526 | 2 K.AFKMKGI chrX@1838   | 4.62E-12 | 6.82E-05 |
| 12Oct2011 | 2192  | 433.55  | -23.4869 | 3 K.SLESLNRI chr3@1032  | 9.93E-11 | 0.002149 |
| 12Oct2011 | 1963  | 433.55  | -23.4869 | 3 K.SLESLNRI chr3@1032  | 4.34E-10 | 0.00917  |
| 11Nov2011 | 14328 | 617.33  | 10.7555  | 2 _M+15.99 chrX@6515    | 1.97E-10 | 0.003616 |
| 11Nov2011 | 22826 | 758.38  | 24.12526 | 4 _MREEGM chr1@2888     | 8.18E-11 | 0.002925 |
| 12Oct2011 | 5180  | 926.99  | 2.210479 | 2 R.RVMIITK- Splice@chr | 2.06E-10 | 0.003229 |
| 12Oct2011 | 5181  | 926.48  | -6.79283 | 2 R.RVMIITK- Splice@chr | 3.02E-10 | 0.006024 |
| 11Nov2011 | 1232  | 570.32  | 2.416213 | 2 _QAGLSFL chr4@1615    | 1.53E-10 | 0.002945 |
| 11Nov2011 | 30623 | 885.13  | 6.561636 | 3 _KGNPAT\ Splice@chr   | 6.96E-11 | 0.002052 |
| 11Nov2011 | 17948 | 700.38  | 15.70909 | 2 K.PMARIPC Splice@chr  | 1.15E-10 | 0.00338  |
| 11Nov2011 | 11680 | 546.29  | 2.238668 | 2 R.IDSSGVSc chr5@1018  | 4.53E-10 | 0.008061 |
| 11Nov2011 | 31503 | 1249.6  | -29.0221 | 2 R.ERKKETC\ chr1@4861  | 1.95E-10 | 0.004604 |
| 11Nov2011 | 5866  | 830.41  | -17.1642 | 1 K.YVYG TAR Splice@chr | 2.83E-10 | 0.005074 |
| 11Nov2011 | 5220  | 830.41  | -17.1642 | 1 K.YVYG TAR Splice@chr | 1.76E-10 | 0.003048 |
| 11Nov2011 | 5357  | 830.41  | -17.1642 | 1 K.YVYG TAR Splice@chr | 2.83E-10 | 0.005322 |
| 12Oct2011 | 4594  | 666.36  | -22.1683 | 2 _QLWSYPF chr5@1935    | 6.14E-11 | 0.001321 |
| 12Oct2011 | 12147 | 917.44  | -29.1037 | 1 R.HMSKWT chr3@9745    | 7.31E-11 | 0.002371 |
| 12Oct2011 | 7298  | 702.37  | -17.2847 | 2 K.SRILCRFH chr5@1045  | 3.35E-11 | 0.00263  |
| 12Oct2011 | 4760  | 544.35  | 24.56405 | 3 R.LLWMSSI Splice@chr  | 3.17E-10 | 0.00824  |
| 12Oct2011 | 4862  | 544.35  | 24.48916 | 3 R.LLWMSSI Splice@chr  | 1.59E-10 | 0.00281  |
| 12Oct2011 | 9876  | 768.46  | 26.76176 | 3 R.IINNP GT\ chr5@1099 | 4.47E-10 | 0.009645 |
| 11Nov2011 | 17552 | 679.36  | -22.0133 | 2 R.TTSIGKYF Splice@chr | 3.41E-10 | 0.006973 |
| 11Nov2011 | 17346 | 536.26  | -20.183  | 2 R.FYPLFPCT chr5@1664  | 3.98E-10 | 0.008965 |
| 11Nov2011 | 14081 | 574.33  | -3.03485 | 2 K.VYKIVGN chr5@1831   | 5.95E-10 | 0.009683 |
| 11Nov2011 | 14088 | 661.34  | -10.2905 | 3 K.SKNYSVF\ chr5@1544  | 4.98E-10 | 0.008159 |
| 12Oct2011 | 173   | 461.57  | 27.10087 | 3 K.LWNM+1 chr1@5348    | 4.88E-10 | 0.009945 |
| 11Nov2011 | 14187 | 1037.54 | -16.5826 | 2 R.SEKNWKI chr1@1495   | 7.42E-11 | 0.001875 |
| 11Nov2011 | 11099 | 588.33  | 16.48908 | 3 R.DLLASDS\ chrX@1441  | 1.22E-10 | 0.002616 |

|           |       |         |          |                         |          |          |
|-----------|-------|---------|----------|-------------------------|----------|----------|
| 12Oct2011 | 870   | 529.82  | 3.578013 | 2 R.VVVVILCI chr2@7280  | 2.56E-10 | 0.005134 |
| 12Oct2011 | 575   | 403.21  | -7.67034 | 2 K.KGGGGCI chr1@1417   | 4.42E-10 | 0.009645 |
| 11Nov2011 | 14230 | 714.41  | 20.1914  | 2 K.LLSTLAM chr3@6647   | 3.36E-10 | 0.006025 |
| 11Nov2011 | 15326 | 859.91  | -3.87387 | 2 K.RIQSENF chrX@1078   | 3.41E-10 | 0.008922 |
| 11Nov2011 | 15347 | 1189.1  | 3.829779 | 2 _EFLEK+14 chr3@8481   | 2.81E-10 | 0.007093 |
| 12Oct2011 | 7979  | 828.73  | -9.43846 | 3 K.TLFPRDN chrX@9192   | 4.77E-10 | 0.006719 |
| 11Nov2011 | 8931  | 678.38  | 17.57094 | 2 K.EPNEQK+ chr5@4849   | 2.60E-10 | 0.006539 |
| 12Oct2011 | 9492  | 833.44  | -11.2602 | 2 V.SRFFLFSE chr5@6536  | 1.12E-10 | 0.003095 |
| 11Nov2011 | 30226 | 1266.31 | -9.00427 | 3 R.WMWKH chr1@1082     | 3.15E-10 | 0.005973 |
| 11Nov2011 | 34425 | 1113.59 | -25.5636 | 2 _TRRNQGI Splice@chr   | 3.96E-12 | 7.08E-05 |
| 12Oct2011 | 1514  | 476.24  | 7.770214 | 2 Q.ISGNFGN chr1@1399   | 4.58E-10 | 0.009696 |
| 11Nov2011 | 7970  | 668.3   | -17.5613 | 2 _HDCYGEK chr2@1130    | 3.48E-10 | 0.006624 |
| 11Nov2011 | 12722 | 746.85  | -20.5113 | 2 R.FICQK+14 Splice@chr | 3.36E-10 | 0.006667 |
| 11Nov2011 | 27492 | 925.48  | 26.35363 | 3 K.AYFNISK+ chr3@1078  | 3.18E-10 | 0.006965 |
| 11Nov2011 | 19471 | 1044.08 | -2.45762 | 2 K.EEAEKEKI Splice@chr | 1.02E-10 | 0.0021   |
| 11Nov2011 | 13050 | 1149.1  | 16.90588 | 2 R.SNCPVFV chr1@7478   | 2.88E-10 | 0.004874 |
| 11Nov2011 | 6171  | 544.79  | 17.69671 | 2 R.LGRENEC chr3@7446   | 4.75E-10 | 0.009546 |
| 11Nov2011 | 14457 | 402.75  | -7.59625 | 2 K.LGLGFGL chr2@1485   | 5.90E-10 | 0.009196 |
| 11Nov2011 | 958   | 529.27  | 2.60415  | 2 K.KQMEHC Splice@chr   | 4.05E-10 | 0.007536 |
| 11Nov2011 | 32141 | 685.38  | -28.7165 | 1 R.AALSAPR chr1@7289   | 4.00E-10 | 0.00821  |
| 11Nov2011 | 7389  | 571.36  | 5.671727 | 2 R.KK+14.01 chr1@2602  | 2.60E-10 | 0.005455 |
| 11Nov2011 | 19530 | 1231.6  | -29.0637 | 1 K.EKLPELSC Splice@chr | 1.12E-10 | 0.003021 |
| 12Oct2011 | 1817  | 419.92  | -6.89638 | 3 K.KLDTLVEI chr1@7089  | 8.68E-11 | 0.001126 |
| 11Nov2011 | 7584  | 1132.53 | 14.38274 | 2 R.SFQEW chr5@6066     | 3.04E-10 | 0.005393 |
| 11Nov2011 | 7671  | 1132.53 | 14.38274 | 2 R.SFQEW chr5@6066     | 5.67E-10 | 0.009363 |
| 11Nov2011 | 7367  | 1132.53 | 14.38274 | 2 R.SFQEW chr5@6066     | 4.40E-10 | 0.009128 |
| 11Nov2011 | 19110 | 910.48  | -12.0797 | 2 _RMVVTFF/ Splice@chr  | 9.68E-11 | 0.002941 |
| 11Nov2011 | 18723 | 910.49  | -1.07376 | 2 _RMVVTFF/ Splice@chr  | 3.53E-10 | 0.006624 |
| 12Oct2011 | 6952  | 886.98  | -16.0513 | 2 R.ASQRLSD chr2@3501   | 4.78E-10 | 0.009766 |
| 12Oct2011 | 6898  | 886.98  | -16.0513 | 2 R.ASQRLSD chr2@3501   | 5.65E-11 | 6.83E-04 |
| 11Nov2011 | 20518 | 592.36  | -24.6673 | 2 K.LIKISTNA chr5@1997  | 1.58E-10 | 0.003651 |
| 11Nov2011 | 22993 | 913.01  | -0.23319 | 2 K.LDVGADI chr1@1449   | 4.46E-10 | 0.008232 |
| 11Nov2011 | 8920  | 905.49  | 9.244951 | 2 K.LIYFVIFC chr5@3807  | 3.80E-11 | 9.50E-04 |
| 11Nov2011 | 29554 | 1193.3  | 4.045875 | 3 K.LKIANPT5 chr5@1831  | 3.32E-10 | 0.006334 |
| 11Nov2011 | 17366 | 644.85  | -1.56372 | 2 K.IDQTTEKI chr4@7066  | 2.07E-10 | 0.006215 |
| 11Nov2011 | 6774  | 816.93  | -8.79362 | 2 F.FHFRNAS chr4@9404   | 2.93E-10 | 0.007097 |
| 11Nov2011 | 6173  | 816.93  | -8.79362 | 2 F.FHFRNAS chr4@9404   | 2.50E-10 | 0.006962 |
| 11Nov2011 | 6971  | 816.93  | -8.79362 | 2 F.FHFRNAS chr4@9404   | 3.17E-10 | 0.007437 |
| 11Nov2011 | 6872  | 816.93  | -8.79362 | 2 F.FHFRNAS chr4@9404   | 3.59E-10 | 0.00797  |
| 11Nov2011 | 11556 | 691.83  | 0.045762 | 2 _FVSLTIGD chr1@1079   | 4.71E-10 | 0.007565 |
| 11Nov2011 | 22509 | 1114.61 | -14.5789 | 2 R.ERERERE chr5@1246   | 1.60E-10 | 0.003959 |
| 11Nov2011 | 27608 | 858.96  | -6.11805 | 2 R.EIRIFPGK chr3@1097  | 1.51E-10 | 0.002884 |
| 11Nov2011 | 25337 | 1138.61 | -20.6721 | 1 K.KSEMK+1 chr2@1477   | 7.34E-11 | 0.001861 |
| 11Nov2011 | 28062 | 958.49  | 24.16012 | 2 R.EANDVM chr5@1162    | 3.05E-11 | 7.46E-04 |
| 11Nov2011 | 25281 | 1134.09 | -9.5645  | 2 R.RFSVSK+ chr1@1209   | 4.43E-10 | 0.007206 |
| 11Nov2011 | 13113 | 746.36  | -20.1151 | 2 R.TFIK+14.( chr4@5722 | 6.18E-10 | 0.00966  |
| 11Nov2011 | 28064 | 1182.15 | -21.582  | 2 R.SFRQFKK chr4@1315   | 4.01E-10 | 0.008627 |

|           |       |         |          |                         |          |          |
|-----------|-------|---------|----------|-------------------------|----------|----------|
| 11Nov2011 | 32664 | 1094.62 | -0.08277 | 2 K.KNYLKK+ chr2@2341   | 3.95E-11 | 9.68E-04 |
| 11Nov2011 | 7079  | 668.85  | -29.4935 | 2 K.ILVMMN chrX@454     | 4.39E-10 | 0.009606 |
| 11Nov2011 | 26982 | 1293.74 | -16.4886 | 1 K.YVNKEAV Splice@chr  | 1.45E-10 | 0.003378 |
| 11Nov2011 | 20618 | 835.44  | 15.36084 | 4 _FYCNFLT( Splice@chr  | 3.51E-10 | 0.007411 |
| 11Nov2011 | 11532 | 779.43  | 16.90966 | 2 R.NEFKNVL chrX@2937   | 3.57E-10 | 0.006744 |
| 11Nov2011 | 12268 | 490.31  | 7.172555 | 2 R.LVHSLAL chr2@1025   | 6.30E-10 | 0.009763 |
| 11Nov2011 | 27715 | 1235.27 | 28.24539 | 3 R.TFDDVLY Splice@chr  | 2.18E-10 | 0.004697 |
| 11Nov2011 | 574   | 822.37  | 13.00436 | 1 R.EESSNTR Splice@chr  | 5.24E-10 | 0.008742 |
| 11Nov2011 | 18623 | 1126.54 | 3.312767 | 1 R.AHTNTYC chr2@1178   | 3.70E-10 | 0.008474 |
| 11Nov2011 | 18571 | 1126.54 | 3.312767 | 1 R.AHTNTYC chr2@1178   | 2.40E-10 | 0.005148 |
| 11Nov2011 | 18343 | 1126.54 | 3.312767 | 1 R.AHTNTYC chr2@1178   | 1.32E-10 | 0.002426 |
| 11Nov2011 | 18399 | 1126.54 | 3.312767 | 1 R.AHTNTYC chr2@1178   | 4.65E-10 | 0.009173 |
| 11Nov2011 | 26137 | 771.41  | 12.35926 | 4 R.VDSKK+1 Splice@chr  | 2.32E-10 | 0.004999 |
| 12Oct2011 | 4669  | 425.98  | -22.5481 | 4 R.RRLGHIG chr4@4216   | 4.85E-11 | 0.001328 |
| 11Nov2011 | 24487 | 928.5   | 17.61428 | 2 R.NQISITST chr1@1818  | 3.81E-10 | 0.008173 |
| 11Nov2011 | 24438 | 928.51  | 28.4126  | 2 R.NQISITST chr1@1818  | 4.66E-10 | 0.009398 |
| 11Nov2011 | 24205 | 928.51  | 28.4126  | 2 R.NQISITST chr1@1818  | 4.39E-10 | 0.007206 |
| 11Nov2011 | 23570 | 1028.53 | 26.89355 | 2 S.QYPQSAC Splice@chr  | 2.20E-10 | 0.004212 |
| 12Oct2011 | 2743  | 729.36  | 23.96708 | 2 S.SRSFEEDf Splice@chr | 2.62E-10 | 0.004768 |
| 12Oct2011 | 8745  | 1028.99 | -28.1424 | 2 R.ESRIETNC chr3@2035  | 4.22E-10 | 0.00917  |
| 11Nov2011 | 26108 | 774.4   | -6.05825 | 4 K.K+14.016 Splice@chr | 4.49E-10 | 0.009911 |
| 11Nov2011 | 14972 | 551.33  | -26.839  | 2 R.MAQKIAI chr1@1280   | 1.03E-10 | 0.003197 |
| 11Nov2011 | 26627 | 1008.49 | -16.5761 | 2 K.EGGSTTK Splice@chr  | 4.92E-10 | 0.009989 |
| 11Nov2011 | 9364  | 552.34  | 10.07424 | 2 R.KVANM+ chr3@2405    | 5.40E-10 | 0.008601 |
| 11Nov2011 | 29973 | 1287.68 | -25.2208 | 2 R.RRKYRNL chr3@8517   | 4.93E-10 | 0.008743 |
| 11Nov2011 | 22071 | 878.44  | 6.717756 | 2 I.IM+15.99 chrX@1350  | 1.91E-10 | 0.003609 |
| 11Nov2011 | 16777 | 554.33  | 11.42918 | 2 _VISFVVTV Splice@chr  | 4.55E-10 | 0.008105 |
| 11Nov2011 | 25915 | 866.93  | 18.82005 | 2 R.WRESSW Splice@chr   | 1.14E-10 | 0.002246 |
| 11Nov2011 | 21761 | 981.51  | -18.7139 | 2 I.NLSLIDDIF chr1@5760 | 6.01E-10 | 0.009981 |
| 11Nov2011 | 21439 | 981.51  | -18.7139 | 2 I.NLSLIDDIF chr1@5760 | 2.50E-10 | 0.00477  |
| 12Oct2011 | 10348 | 936.85  | 20.95764 | 3 K.RKLGFLT( chr1@1316  | 4.52E-10 | 0.006292 |
| 12Oct2011 | 7516  | 633.9   | -22.341  | 2 K.KVIGHKG chrX@1615   | 5.27E-12 | 3.16E-04 |
| 12Oct2011 | 3148  | 706.35  | 3.768388 | 2 R.KSDQM+ chr3@1854    | 1.42E-10 | 0.003483 |
| 11Nov2011 | 33327 | 1003.6  | 1.830296 | 1 R.SISGLSLG chr5@1982  | 2.53E-10 | 0.00534  |
| 11Nov2011 | 3856  | 487.24  | 0.418423 | 3 R.VSCSAPD chrX@1337   | 6.29E-10 | 0.006935 |
| 12Oct2011 | 10814 | 802.93  | 2.968341 | 4 K.FWIK+14 Splice@chr  | 8.12E-11 | 0.002668 |
| 12Oct2011 | 771   | 417.23  | -17.45   | 2 R.KGGALM chrX@1867    | 1.12E-10 | 0.003095 |
| 12Oct2011 | 1285  | 504.62  | 29.00679 | 3 _EFKNSSIK chr2@1501   | 3.37E-10 | 0.00759  |
| 11Nov2011 | 27302 | 995.5   | 20.41838 | 2 K.HFKAIFIN chr2@2065  | 3.66E-10 | 0.006311 |
| 11Nov2011 | 24655 | 995.5   | 20.41838 | 2 K.HFKAIFIN chr2@2065  | 2.90E-10 | 0.005204 |
| 11Nov2011 | 27906 | 995.48  | 0.277404 | 2 K.HFKAIFIN chr2@2065  | 5.08E-10 | 0.009945 |
| 11Nov2011 | 5737  | 629.38  | -12.8213 | 2 K.KEIKIFHSI chr4@7540 | 2.81E-10 | 0.005034 |
| 11Nov2011 | 18957 | 858.95  | -13.0187 | 2 R.RASFPNR Splice@chr  | 4.30E-10 | 0.009357 |
| 12Oct2011 | 9386  | 859.46  | -3.30678 | 2 R.RASFPNR chr3@1377   | 4.79E-10 | 0.00991  |
| 11Nov2011 | 28045 | 1126.08 | -15.7112 | 2 K.YPSNK+1 chr4@5300   | 1.61E-10 | 0.003726 |
| 12Oct2011 | 9732  | 1336.62 | 11.69889 | 2 R.AEEK+14 Splice@chr  | 4.59E-10 | 0.009766 |
| 11Nov2011 | 2164  | 719.83  | -24.7664 | 2 K.QEMIAM Splice@chr   | 3.65E-10 | 0.00931  |

|           |       |         |          |                         |          |          |
|-----------|-------|---------|----------|-------------------------|----------|----------|
| 11Nov2011 | 2453  | 719.83  | -24.7664 | 2 K.QEMIAM Splice@chr   | 3.87E-10 | 0.009906 |
| 11Nov2011 | 2368  | 719.83  | -24.7664 | 2 K.QEMIAM Splice@chr   | 4.06E-10 | 0.008766 |
| 11Nov2011 | 13571 | 584.69  | -9.76929 | 5 _.TVFYGDL chr4@5567   | 6.95E-11 | 0.001875 |
| 11Nov2011 | 13103 | 584.69  | -9.76929 | 5 _.TVFYGDL chr4@5567   | 2.64E-10 | 0.00703  |
| 11Nov2011 | 25921 | 1155.1  | -1.03079 | 2 K.MSSYLVA Splice@chr  | 4.46E-10 | 0.009681 |
| 11Nov2011 | 7568  | 568.28  | -18.2643 | 3 R.IACISLEKI chr1@1063 | 6.50E-11 | 0.001494 |
| 11Nov2011 | 7593  | 426.47  | 0.61131  | 4 R.IACISLEKI chr1@1063 | 3.49E-10 | 0.007143 |
| 11Nov2011 | 7993  | 567.96  | 7.248812 | 3 R.IACISLEKI chr1@1063 | 6.67E-11 | 0.001553 |
| 11Nov2011 | 8075  | 567.96  | 7.248812 | 3 R.IACISLEKI chr1@1063 | 7.12E-11 | 0.001484 |
| 11Nov2011 | 7829  | 567.96  | 7.248812 | 3 R.IACISLEKI chr1@1063 | 5.29E-10 | 0.008949 |
| 11Nov2011 | 8042  | 567.96  | 7.248812 | 3 R.IACISLEKI chr1@1063 | 1.79E-10 | 0.004314 |
| 11Nov2011 | 7206  | 567.96  | 7.248812 | 3 R.IACISLEKI chr1@1063 | 3.34E-10 | 0.006049 |
| 12Oct2011 | 2939  | 567.96  | 7.248812 | 3 R.IACISLEKI chr1@1063 | 3.67E-10 | 0.009187 |
| 12Oct2011 | 13372 | 995.56  | 26.8031  | 2 _.KTVK+14. chrX@2351  | 4.01E-10 | 0.008125 |
| 11Nov2011 | 10730 | 634.32  | -26.9556 | 2 R.SQLSCAG chr2@2177   | 2.87E-10 | 0.004177 |
| 11Nov2011 | 3585  | 1043.56 | -23.8854 | 1 _.GAQDQG Splice@chr   | 1.62E-10 | 0.003833 |
| 12Oct2011 | 8364  | 517.26  | -17.5762 | 3 K.NHFTFEG chr3@4119   | 2.11E-10 | 0.005429 |
| 11Nov2011 | 3173  | 489.91  | -15.9794 | 3 K.NIFNSTN chr5@1741   | 3.97E-10 | 0.009493 |
| 11Nov2011 | 29680 | 675.38  | -7.47071 | 2 K.NEKVSLD chr5@1144   | 4.20E-10 | 0.006877 |
| 11Nov2011 | 28201 | 675.38  | -7.47071 | 2 K.NEKVSLD chr5@1144   | 2.43E-10 | 0.004533 |
| 12Oct2011 | 8958  | 1151.59 | 8.59372  | 2 N.RNFLFFD chrX@1730   | 3.48E-10 | 0.009005 |
| 12Oct2011 | 8284  | 1151.59 | 8.59372  | 2 N.RNFLFFD chrX@1730   | 2.10E-11 | 6.33E-04 |
| 12Oct2011 | 9266  | 1151.58 | -0.1061  | 2 N.RNFLFFD chrX@1730   | 3.97E-11 | 4.74E-04 |
| 11Nov2011 | 412   | 473.24  | -18.0944 | 2 R.VVGAEDI chr5@2771   | 1.35E-10 | 0.004052 |
| 11Nov2011 | 36025 | 1217.94 | -6.60492 | 3 K.FFDLFTT chr2@1370   | 5.05E-10 | 0.009984 |
| 11Nov2011 | 16594 | 1010.54 | 24.66782 | 2 L.YAMQKLI chr4@1517   | 3.35E-10 | 0.006871 |
| 12Oct2011 | 7604  | 655.42  | 22.29135 | 2 K.KNVLKLC chr5@7846   | 1.45E-10 | 0.002351 |
| 11Nov2011 | 15862 | 691.4   | 1.414506 | 1 R.TTVSVGK chr2@1145   | 3.42E-10 | 0.00583  |
| 11Nov2011 | 4307  | 818.45  | -4.7786  | 2 K.MQLKKM Splice@chr   | 9.92E-11 | 0.002472 |
| 12Oct2011 | 10569 | 1090.01 | -0.89675 | 2 _.K+14.016 chrX@1488  | 3.47E-10 | 0.007256 |
| 11Nov2011 | 3894  | 780.39  | 18.58703 | 1 R.GALSSGC chr3@5783   | 1.16E-10 | 0.002563 |
| 11Nov2011 | 26071 | 858.44  | 4.057485 | 2 R.EKRFSTSc chrX@3059  | 4.28E-10 | 0.009503 |
| 11Nov2011 | 6529  | 568.64  | -26.0705 | 3 R.VSEVM+ chr1@8978    | 4.37E-10 | 0.007612 |
| 11Nov2011 | 27070 | 846.05  | -29.551  | 3 K.KIK+14.0 chr3@8073  | 5.88E-11 | 0.001531 |
| 11Nov2011 | 26000 | 846.05  | -29.551  | 3 K.KIK+14.0 chr3@8073  | 3.51E-10 | 0.006742 |
| 12Oct2011 | 307   | 532.26  | 18.68952 | 2 W.SSAMLE chr3@1203    | 3.98E-10 | 0.00564  |
| 12Oct2011 | 351   | 532.26  | 18.68952 | 2 W.SSAMLE chr3@1203    | 3.35E-10 | 0.00759  |
| 11Nov2011 | 27103 | 1208.3  | -28.9843 | 3 R.QFRVK+1 chr4@1181   | 2.65E-10 | 0.005706 |
| 11Nov2011 | 12696 | 861.97  | 19.68558 | 2 L.RQELGHV chrX@3091   | 5.93E-10 | 0.009341 |
| 11Nov2011 | 34602 | 1113.57 | -15.3391 | 2 R.LLMWLV chr2@4501    | 2.63E-10 | 0.004015 |
| 12Oct2011 | 10755 | 577.13  | 13.59401 | 4 K.HPQQHK chrX@7550    | 3.41E-10 | 0.004293 |
| 11Nov2011 | 23709 | 1064.55 | -29.4969 | 2 K.MK+14.0 chr5@7816   | 3.90E-11 | 7.15E-04 |
| 11Nov2011 | 11103 | 815.41  | -10.0849 | 2 K.LTKDFGS chr2@9991   | 2.65E-11 | 6.52E-04 |
| 11Nov2011 | 30735 | 995.55  | 11.29223 | 2 _.NCSAISLI Splice@chr | 3.23E-10 | 0.005634 |
| 11Nov2011 | 20698 | 895.5   | -14.2653 | 3 K.K+14.016 chr2@9354  | 1.27E-10 | 0.003507 |
| 11Nov2011 | 4767  | 416.26  | 12.21711 | 2 K.VGVSEII chrX@1381   | 1.68E-10 | 0.00421  |
| 12Oct2011 | 9703  | 1105.58 | -12.3774 | 2 K.STRNKM chr3@1051    | 2.24E-10 | 0.007212 |

|           |       |         |          |                         |          |          |
|-----------|-------|---------|----------|-------------------------|----------|----------|
| 11Nov2011 | 7994  | 486.79  | -0.81668 | 2 K.VIQEEVKI chr4@5147  | 3.24E-10 | 0.004012 |
| 11Nov2011 | 7336  | 486.79  | -0.81668 | 2 K.VIQEEVKI chr4@5147  | 3.28E-10 | 0.006214 |
| 11Nov2011 | 3338  | 848.45  | 0.795726 | 1 K.NGICGAK chr4@1157   | 2.38E-10 | 0.004897 |
| 11Nov2011 | 23975 | 867.99  | 10.63045 | 2 R.LEKTTMC chrX@4953   | 2.41E-10 | 0.005984 |
| 11Nov2011 | 34370 | 1113.59 | 1.974928 | 2 E.NLKFM+1 chr5@3442   | 4.48E-10 | 0.007317 |
| 12Oct2011 | 10729 | 818.43  | 8.790465 | 3 _ACNIM+1 chr4@1651    | 2.18E-10 | 0.003482 |
| 12Oct2011 | 5713  | 724.7   | -18.9836 | 3 R.GETHRGI chr5@1905   | 1.66E-11 | 5.82E-04 |
| 11Nov2011 | 28420 | 862.45  | 20.24177 | 2 V.VHNELFR chr4@4181   | 5.02E-10 | 0.009114 |
| 11Nov2011 | 33809 | 933.46  | -21.0179 | 3 R.EKFNEEG chr3@1212   | 1.37E-10 | 0.002943 |
| 12Oct2011 | 10592 | 1103.51 | 27.01669 | 3 R.SCVSNQI chr1@4743   | 1.93E-10 | 0.003229 |
| 11Nov2011 | 19891 | 912.45  | 18.70666 | 1 K.VYICNDK chr4@1647   | 8.28E-10 | 0.009504 |
| 11Nov2011 | 16852 | 486.53  | -9.6796  | 4 R.QNSKTLN chr1@1064   | 3.99E-10 | 0.007244 |
| 11Nov2011 | 1009  | 523.3   | -9.64809 | 2 K.M+15.99 chr4@1097   | 1.74E-10 | 0.004252 |
| 11Nov2011 | 12677 | 804.89  | -28.7536 | 2 K.LYFYTTYF chr1@9038  | 2.38E-10 | 0.00454  |
| 11Nov2011 | 28265 | 986.55  | -11.0235 | 2 R.RWPGKK Splice@chr   | 2.52E-10 | 0.004235 |
| 11Nov2011 | 21326 | 889.48  | -11.5119 | 2 R.RK+14.01 chr4@1368  | 3.35E-10 | 0.007906 |
| 11Nov2011 | 22715 | 697.33  | -21.9517 | 3 K.GYSSIVV chrX@1512   | 2.51E-10 | 0.005643 |
| 12Oct2011 | 7399  | 534.31  | 14.1498  | 2 K.INFSTFIPI chrX@1437 | 9.08E-11 | 0.002796 |
| 11Nov2011 | 9660  | 490.28  | -16.9653 | 2 R.LSGTVPII chr3@1364  | 2.44E-10 | 0.006547 |
| 11Nov2011 | 14628 | 945.46  | -20.7217 | 2 _ILCSTDVS Splice@chr  | 1.91E-11 | 0.001042 |
| 11Nov2011 | 7917  | 745.9   | -28.5725 | 2 _GLVQLSN Splice@chr   | 1.87E-10 | 0.003752 |
| 12Oct2011 | 4810  | 1093.58 | 22.68119 | 1 _KMWWR chr5@1238      | 4.40E-10 | 0.006292 |
| 11Nov2011 | 27084 | 889.48  | -21.639  | 2 R.NHGLFISI chr3@4519  | 1.98E-10 | 0.003816 |
| 11Nov2011 | 10177 | 935.45  | -17.9789 | 1 K.SDSAQIM chr4@1711   | 1.22E-10 | 0.003341 |
| 11Nov2011 | 7483  | 565.8   | -29.1471 | 2 K.ETEIGAQ chr3@6937   | 2.41E-10 | 0.004407 |
| 12Oct2011 | 5641  | 508.94  | 26.99757 | 3 K.AIIACSTH chr2@1266  | 2.30E-10 | 0.005442 |
| 12Oct2011 | 2826  | 535.61  | -28.9221 | 3 K.NQVEKID chrX@9301   | 6.06E-11 | 0.001498 |
| 11Nov2011 | 20738 | 884.51  | 7.36281  | 2 R.IK+14.01 chr1@1350  | 3.27E-10 | 0.004012 |
| 12Oct2011 | 11552 | 1129.55 | -27.5659 | 2 K.MFLKLEN chr5@1976   | 1.68E-10 | 0.004885 |
| 11Nov2011 | 26947 | 929.46  | -19.0638 | 2 R.K+14.016 chr2@5626  | 4.33E-10 | 0.007483 |
| 11Nov2011 | 1556  | 490.3   | 5.03618  | 3 R.KICHKLGI chr1@1280  | 2.15E-10 | 0.005745 |
| 11Nov2011 | 20159 | 893.97  | 2.802413 | 2 E.GGGERNI chr3@2669   | 3.64E-10 | 0.008552 |
| 12Oct2011 | 8325  | 742.71  | -21.9252 | 3 S.FVK+14.0 chrX@1733  | 1.57E-10 | 0.005126 |
| 11Nov2011 | 18494 | 1070.55 | -21.3229 | 2 K.CFAIELAK chrX@1253  | 2.87E-10 | 0.008596 |
| 11Nov2011 | 1116  | 648.81  | -24.8731 | 2 R.KEGK+14 chr5@1450   | 1.26E-11 | 3.95E-04 |
| 11Nov2011 | 636   | 848.41  | 19.30339 | 1 K.EAGGAGI chrX@4385   | 1.31E-10 | 0.003398 |
| 11Nov2011 | 23270 | 1049.24 | 23.13597 | 3 K.RFSEISPF chr4@1630  | 1.30E-10 | 0.003979 |
| 11Nov2011 | 11864 | 991.5   | -24.5667 | 2 R.FLPKNLN chr1@3330   | 3.17E-10 | 0.005609 |
| 11Nov2011 | 32615 | 1016.52 | 27.43742 | 3 K.NRM+15. Splice@chr  | 1.91E-10 | 0.003939 |
| 12Oct2011 | 7708  | 715.37  | -25.044  | 3 K.ITKNRRD chr4@1090   | 4.48E-11 | 0.001209 |
| 12Oct2011 | 11116 | 806.73  | 18.78688 | 3 R.DPPDEYS chr1@3030   | 2.89E-10 | 0.008171 |
| 11Nov2011 | 33514 | 961.2   | 11.2135  | 3 R.HFQMLH Splice@chr   | 5.09E-10 | 0.008435 |
| 11Nov2011 | 25118 | 1310.65 | -8.34688 | 1 R.RAESSQL Splice@chr  | 2.44E-10 | 0.006564 |
| 11Nov2011 | 22819 | 959.04  | -12.6516 | 2 K.KIISSENT chr2@3868  | 5.58E-10 | 0.009102 |
| 11Nov2011 | 290   | 464.26  | 11.92384 | 2 _KEDHTRK chrX@1067    | 2.61E-10 | 0.00492  |
| 11Nov2011 | 301   | 464.26  | 11.92384 | 2 _KEDHTRK chrX@1067    | 3.91E-10 | 0.009998 |
| 12Oct2011 | 8087  | 927.46  | 17.30492 | 3 _VCYSTTN chr5@5531    | 1.27E-10 | 0.00478  |

|           |       |         |          |                         |          |          |
|-----------|-------|---------|----------|-------------------------|----------|----------|
| 11Nov2011 | 12230 | 860.51  | 17.11424 | 1 K.TVLDTRR chr1@8589   | 3.67E-10 | 0.009672 |
| 11Nov2011 | 26975 | 1123.27 | -27.7618 | 3 K.KKNAILRI chr3@1194  | 4.51E-10 | 0.008377 |
| 11Nov2011 | 26649 | 1235.6  | -6.99733 | 2 K.THPATRC Splice@chr  | 5.41E-10 | 0.009503 |
| 11Nov2011 | 163   | 755.37  | -3.72183 | 1 R.FAGFG EK chr3@2047  | 3.51E-10 | 0.008086 |
| 11Nov2011 | 30242 | 1114.11 | 15.57292 | 2 R.KEELK+14 chrX@1452  | 1.86E-10 | 0.003206 |
| 11Nov2011 | 34799 | 1015.23 | -1.68502 | 3 R.K+14.016 Splice@chr | 6.52E-10 | 0.00996  |
| 11Nov2011 | 19286 | 772.71  | -23.9209 | 3 K.QSTKMK chr2@9078    | 2.81E-10 | 0.007093 |
| 11Nov2011 | 885   | 404.23  | -8.63602 | 2 R.RTISMAK chr1@6449   | 3.77E-10 | 0.006804 |
| 11Nov2011 | 21210 | 516.64  | -7.57559 | 3 R.NIIFSIQT chrX@2969  | 2.91E-10 | 0.003862 |
| 11Nov2011 | 1932  | 453.23  | 21.46024 | 2 K.ASVTEEN chr5@1483   | 3.14E-10 | 0.005519 |
| 11Nov2011 | 27171 | 1235.27 | -4.20385 | 3 K.LDYANN chr3@3950    | 4.94E-10 | 0.00984  |
| 11Nov2011 | 21243 | 805.92  | -9.90034 | 2 K.FSILSICQI chr3@1140 | 4.74E-10 | 0.007205 |
| 12Oct2011 | 3090  | 825.4   | 17.4227  | 1 K.KSEMDSt chr5@1175   | 1.96E-10 | 0.005408 |
| 11Nov2011 | 5395  | 429.27  | 13.25437 | 2 R.KIGVQAN chrX@8273   | 2.80E-10 | 0.006883 |
| 11Nov2011 | 21901 | 1341.67 | -27.3927 | 2 R.EK+14.01 chr1@1040  | 3.53E-10 | 0.00883  |
| 11Nov2011 | 695   | 499.3   | 1.531111 | 2 R.NLRASAL chrX@9413   | 2.93E-11 | 8.12E-04 |
| 11Nov2011 | 1566  | 447.56  | 9.112144 | 3 R.NCSYLSN chrX@5672   | 3.88E-10 | 0.009176 |
| 11Nov2011 | 28591 | 1163.26 | 2.969286 | 2 K.AKILISPKI chr3@1170 | 4.25E-11 | 0.001633 |
| 12Oct2011 | 7375  | 1040.53 | -29.1053 | 2 V.IFSKINKN chr5@1728  | 3.23E-10 | 0.008751 |
| 12Oct2011 | 7591  | 1040.53 | -29.1053 | 2 V.IFSKINKN chr5@1728  | 2.88E-10 | 0.008171 |
| 12Oct2011 | 8176  | 1040.53 | -29.1053 | 2 V.IFSKINKN chr5@1728  | 1.06E-10 | 0.00331  |
| 12Oct2011 | 9547  | 1040.53 | -29.1053 | 2 V.IFSKINKN chr5@1728  | 2.04E-10 | 0.004412 |
| 12Oct2011 | 9376  | 1040.53 | -29.1053 | 2 V.IFSKINKN chr5@1728  | 4.39E-10 | 0.009903 |
| 12Oct2011 | 12758 | 1020.51 | -26.7002 | 1 K.RTNTNRM Splice@chr  | 3.63E-10 | 0.00984  |
| 11Nov2011 | 19026 | 634.84  | -26.0662 | 2 K.RGKLM+: Splice@chr  | 5.45E-10 | 0.009559 |
| 11Nov2011 | 19904 | 634.84  | -26.0662 | 2 K.RGKLM+: Splice@chr  | 3.92E-10 | 0.005834 |
| 11Nov2011 | 19309 | 634.84  | -26.0662 | 2 K.RGKLM+: Splice@chr  | 2.21E-10 | 0.003981 |
| 11Nov2011 | 7319  | 919.45  | 20.22719 | 1 K.DDARGQ chrX@5563    | 3.35E-10 | 0.005997 |
| 11Nov2011 | 11876 | 552.31  | -1.21782 | 2 K.LGMSQT chr1@2263    | 1.90E-10 | 0.003467 |
| 11Nov2011 | 4873  | 934.43  | -21.1405 | 1 _TSQSTMt chrX@3696    | 5.86E-11 | 0.001284 |
| 11Nov2011 | 28146 | 1118.56 | -8.71397 | 2 K.RAM+15. chr5@1448   | 2.27E-10 | 0.004276 |
| 11Nov2011 | 22262 | 1244.14 | 19.18169 | 2 R.QFSDLPE chr2@1516   | 5.27E-10 | 0.009603 |
| 11Nov2011 | 9214  | 862.49  | -11.3357 | 1 _SSASGKV chrX@1646    | 2.82E-10 | 0.005132 |
| 12Oct2011 | 8265  | 1144.59 | 6.724905 | 2 P.YVAMRI Splice@chr   | 3.28E-10 | 0.006933 |
| 12Oct2011 | 8957  | 1144.59 | 6.724905 | 2 P.YVAMRI Splice@chr   | 1.16E-10 | 0.001987 |
| 11Nov2011 | 22487 | 1339.61 | -25.9892 | 2 _VVEYEFEl Splice@chr  | 3.47E-10 | 0.008438 |
| 11Nov2011 | 31563 | 1153.94 | -0.56468 | 3 R.KQWASA chrX@1588    | 4.28E-10 | 0.007212 |
| 11Nov2011 | 7656  | 493.78  | -11.3951 | 2 K.KNQEINII Splice@chr | 3.17E-10 | 0.009591 |
| 11Nov2011 | 22969 | 581.65  | 11.07241 | 3 K.SVFFEGS chrX@5568   | 3.61E-10 | 0.008264 |
| 12Oct2011 | 1413  | 743.37  | 1.644353 | 1 K.NAENAPt chr3@1646   | 3.52E-10 | 0.004521 |
| 12Oct2011 | 10699 | 1127.58 | 12.60305 | 2 K.MYKKCAI chr3@1195   | 4.27E-10 | 0.00917  |
| 11Nov2011 | 8936  | 538.8   | 13.73273 | 2 R.VLINSGA chr4@1655   | 6.94E-11 | 0.001663 |
| 11Nov2011 | 14455 | 715.88  | -27.0644 | 2 R.RRYIDAKt chrX@5853  | 8.96E-11 | 0.001863 |
| 11Nov2011 | 11703 | 806.44  | 4.471004 | 2 K.NK+14.01 chrX@1065  | 4.22E-10 | 0.008913 |
| 12Oct2011 | 4863  | 1070.54 | 3.112633 | 2 K.NLMSLFL chr2@3601   | 2.18E-10 | 0.007212 |
| 11Nov2011 | 29644 | 1094.62 | -9.59933 | 2 K.TILFNLSN chr5@2021  | 1.71E-10 | 0.003667 |
| 11Nov2011 | 1168  | 550.3   | -1.83313 | 2 R.QKEKAKE chr3@1051   | 1.70E-10 | 0.004705 |

|           |       |         |          |                         |          |          |
|-----------|-------|---------|----------|-------------------------|----------|----------|
| 11Nov2011 | 1229  | 550.3   | -1.83313 | 2 R.QKEKAKE chr3@1051   | 1.29E-10 | 0.003593 |
| 11Nov2011 | 1119  | 550.3   | -1.83313 | 2 R.QKEKAKE chr3@1051   | 2.46E-10 | 0.007533 |
| 11Nov2011 | 23859 | 1058.99 | -22.614  | 2 R.WWWW' Splice@chr    | 1.46E-10 | 0.002474 |
| 12Oct2011 | 1720  | 1034.52 | 14.17366 | 1 _TLKNGEC Splice@chr   | 1.79E-10 | 0.00458  |
| 12Oct2011 | 12230 | 1114.26 | -26.5241 | 3 K.LEPELEPk chr5@1486  | 7.78E-11 | 0.001321 |
| 12Oct2011 | 4823  | 1353.63 | 17.44783 | 2 K.WPECSKI chr2@1179   | 2.55E-10 | 0.004768 |
| 12Oct2011 | 4901  | 1353.63 | 17.44783 | 2 K.WPECSKI chr2@1179   | 6.72E-11 | 0.00174  |
| 12Oct2011 | 4786  | 1353.63 | 17.44783 | 2 K.WPECSKI chr2@1179   | 8.76E-11 | 0.002007 |
| 12Oct2011 | 5001  | 1353.63 | 17.44783 | 2 K.WPECSKI chr2@1179   | 9.20E-11 | 0.002001 |
| 12Oct2011 | 1786  | 707.34  | -26.4152 | 2 K.KNNFIEY\ chr5@5173  | 4.20E-10 | 0.006078 |
| 12Oct2011 | 2038  | 707.34  | -26.4152 | 2 K.KNNFIEY\ chr5@5173  | 4.07E-10 | 0.009135 |
| 11Nov2011 | 12852 | 750.9   | -24.3356 | 2 K.SKTSRFRI chr1@2447  | 2.73E-10 | 0.004981 |
| 12Oct2011 | 6190  | 891.46  | 18.14164 | 2 K.K+14.016 chr1@2299  | 1.28E-10 | 0.003035 |
| 12Oct2011 | 8213  | 678.01  | 13.68152 | 3 R.VFNVFSL Splice@chr  | 3.68E-10 | 0.008703 |
| 11Nov2011 | 29537 | 995.98  | -17.728  | 2 R.FHISVPST Splice@chr | 1.32E-10 | 0.002825 |
| 11Nov2011 | 5323  | 1047.52 | -10.006  | 2 P.HLCIGNT\ Splice@chr | 5.94E-10 | 0.009662 |
| 11Nov2011 | 732   | 430.74  | -23.3883 | 2 R.KGVGEEI chrX@1063   | 4.76E-11 | 9.80E-04 |
| 11Nov2011 | 29939 | 987.08  | 29.07748 | 2 E.NLM+15. chr1@6758   | 2.60E-11 | 4.83E-04 |
| 11Nov2011 | 24875 | 859.5   | 7.364018 | 2 K.KNFTLSG chr5@1959   | 2.29E-10 | 0.006182 |
| 11Nov2011 | 20454 | 682.38  | -24.3359 | 2 K.FLSEKLPK chr4@1871  | 2.57E-10 | 0.00487  |
| 12Oct2011 | 359   | 609.32  | -23.7789 | 2 K.KM+15.9 chr4@1378   | 9.42E-11 | 0.001944 |
| 11Nov2011 | 11129 | 499.25  | 29.21734 | 2 _QFFSDPE Splice@chr   | 4.85E-11 | 0.001499 |
| 12Oct2011 | 7568  | 1115.1  | 6.276672 | 2 S.LYSSCPC chrX@1173   | 1.96E-11 | 5.82E-04 |
| 11Nov2011 | 24742 | 1043.57 | 14.0877  | 2 _YCRKMQ chr2@1301     | 2.13E-10 | 0.004354 |
| 11Nov2011 | 29199 | 1150.6  | 3.426931 | 2 K.NERIHWC chr4@1388   | 6.81E-10 | 0.007802 |
| 11Nov2011 | 8780  | 629.85  | 20.83805 | 2 S.VPALNGA chr2@1323   | 3.16E-10 | 0.005324 |
| 11Nov2011 | 9666  | 629.85  | 20.83805 | 2 S.VPALNGA chr2@1323   | 3.34E-10 | 0.006527 |
| 11Nov2011 | 8430  | 629.85  | 20.83805 | 2 S.VPALNGA chr2@1323   | 2.69E-10 | 0.004851 |
| 11Nov2011 | 2027  | 453.23  | 23.44574 | 2 K.WSQPGS Splice@chr   | 2.51E-10 | 0.00459  |
| 11Nov2011 | 28432 | 958.53  | 25.16147 | 2 _YLDFEFV\ chr3@5253   | 2.87E-10 | 0.005132 |
| 11Nov2011 | 25194 | 1019.51 | 15.28146 | 1 R.PGSEM+ chr4@1731    | 7.05E-11 | 0.001875 |
| 11Nov2011 | 8510  | 834.94  | -6.99248 | 2 C.RRPNTFC Splice@chr  | 4.33E-10 | 0.009608 |
| 11Nov2011 | 17966 | 1099.53 | 20.7803  | 2 R.FQYHFTY chr5@4482   | 3.98E-10 | 0.009493 |
| 11Nov2011 | 6639  | 1084.53 | -19.9007 | 1 R.YVSR RCS Splice@chr | 3.01E-10 | 0.005283 |
| 11Nov2011 | 9618  | 978.52  | -6.11901 | 1 K.GYENLIQ chrX@6313   | 1.74E-10 | 0.003408 |
| 11Nov2011 | 8068  | 979.53  | 0.689023 | 1 K.GYENLIQ chrX@6313   | 4.04E-10 | 0.007704 |
| 11Nov2011 | 15371 | 754.38  | -0.40508 | 2 K.FFWAVFc chr4@5165   | 4.45E-10 | 0.009606 |
| 11Nov2011 | 33267 | 1062.09 | 12.57559 | 2 R.RWNFRIS gi 3928894  | 1.83E-10 | 0.003271 |
| 11Nov2011 | 21118 | 733.14  | -16.0734 | 4 K.KSIK+14.( chrX@1273 | 3.87E-10 | 0.00799  |
| 11Nov2011 | 7483  | 439.24  | 21.7275  | 3 _LSFNADV Splice@chr   | 3.08E-10 | 0.005773 |
| 11Nov2011 | 7539  | 439.24  | 21.7275  | 3 _LSFNADV Splice@chr   | 4.33E-10 | 0.008303 |
| 11Nov2011 | 27172 | 791.4   | -7.02709 | 2 R.RCNRNGI chr2@1256   | 4.57E-10 | 0.007744 |
| 11Nov2011 | 30995 | 838.1   | -11.9576 | 3 K.SINFGDFI chr3@1206  | 4.05E-10 | 0.009074 |
| 12Oct2011 | 4404  | 530.34  | -6.74972 | 2 R.LLVKMVI Splice@chr  | 3.75E-10 | 0.008252 |
| 12Oct2011 | 9973  | 1139.56 | -25.731  | 2 _YYCKFK+ chr4@2922    | 3.44E-10 | 0.007447 |
| 11Nov2011 | 19481 | 1178.62 | -25.7788 | 1 _SYLPIAEV Splice@chr  | 2.53E-10 | 0.005643 |
| 11Nov2011 | 19637 | 1177.62 | -22.9276 | 1 _SYLPIAEV Splice@chr  | 1.02E-10 | 0.001929 |

|           |       |         |          |                          |          |          |
|-----------|-------|---------|----------|--------------------------|----------|----------|
| 11Nov2011 | 19520 | 1177.62 | -22.9276 | 1 _._SYLPIAEV Splice@chr | 5.37E-10 | 0.0097   |
| 12Oct2011 | 8777  | 938.98  | 22.1703  | 2 R.LCSYFLLP chrX@1072   | 2.92E-10 | 0.008751 |
| 11Nov2011 | 13103 | 800.43  | 0.727115 | 2 R.ELWKNSc chrX@1126    | 1.01E-10 | 0.001871 |
| 11Nov2011 | 13019 | 800.43  | 0.727115 | 2 R.ELWKNSc chrX@1126    | 8.98E-11 | 0.002781 |
| 11Nov2011 | 31533 | 987.01  | -3.06459 | 2 R.KNCLPK+ chr3@6344    | 2.92E-10 | 0.005386 |
| 11Nov2011 | 12235 | 1034.52 | 26.89942 | 1 K.YNNHINN chr5@3176    | 2.68E-10 | 0.004851 |
| 12Oct2011 | 2790  | 535.61  | -17.2487 | 3 K.QVLEKFN chr5@1221    | 2.59E-11 | 2.34E-04 |
| 12Oct2011 | 2713  | 535.61  | -17.2487 | 3 K.QVLEKFN chr5@1221    | 4.60E-10 | 0.009766 |
| 12Oct2011 | 2751  | 535.61  | -17.2487 | 3 K.QVLEKFN chr5@1221    | 1.57E-10 | 0.003746 |
| 12Oct2011 | 2902  | 535.61  | -17.2487 | 3 K.QVLEKFN chr5@1221    | 1.10E-10 | 0.003372 |
| 12Oct2011 | 2948  | 535.61  | -17.2487 | 3 K.QVLEKFN chr5@1221    | 3.03E-11 | 0.001386 |
| 12Oct2011 | 2989  | 535.61  | -17.2487 | 3 K.QVLEKFN chr5@1221    | 6.69E-11 | 0.002195 |
| 12Oct2011 | 2490  | 535.61  | -17.2487 | 3 K.QVLEKFN chr5@1221    | 9.92E-11 | 0.003781 |
| 12Oct2011 | 2406  | 535.61  | -17.2487 | 3 K.QVLEKFN chr5@1221    | 6.66E-11 | 0.002212 |
| 12Oct2011 | 2487  | 535.61  | -17.2487 | 3 K.QVLEKFN chr5@1221    | 3.61E-10 | 0.00985  |
| 12Oct2011 | 2296  | 535.61  | -17.2487 | 3 K.QVLEKFN chr5@1221    | 1.61E-10 | 0.004903 |
| 12Oct2011 | 2512  | 535.61  | -17.2487 | 3 K.QVLEKFN chr5@1221    | 6.35E-11 | 0.00263  |
| 12Oct2011 | 2529  | 535.61  | -17.2487 | 3 K.QVLEKFN chr5@1221    | 2.81E-11 | 5.34E-04 |
| 12Oct2011 | 2564  | 535.61  | -17.2487 | 3 K.QVLEKFN chr5@1221    | 1.03E-10 | 0.001969 |
| 12Oct2011 | 3258  | 535.61  | -17.2487 | 3 K.QVLEKFN chr5@1221    | 2.60E-11 | 9.95E-04 |
| 12Oct2011 | 3306  | 535.61  | -17.2487 | 3 K.QVLEKFN chr5@1221    | 4.99E-11 | 0.001347 |
| 12Oct2011 | 3292  | 535.61  | -17.2487 | 3 K.QVLEKFN chr5@1221    | 2.73E-11 | 8.00E-04 |
| 12Oct2011 | 3329  | 535.61  | -17.2487 | 3 K.QVLEKFN chr5@1221    | 7.88E-11 | 0.001321 |
| 12Oct2011 | 2867  | 535.61  | -17.2487 | 3 K.QVLEKFN chr5@1221    | 1.32E-10 | 0.004477 |
| 12Oct2011 | 2355  | 619.98  | -25.3086 | 3 R.ETLENALi chrX@1563   | 4.03E-10 | 0.009135 |
| 12Oct2011 | 5531  | 667.36  | -5.9537  | 1 K.RGGGLA† chr5@6661    | 8.67E-11 | 0.002559 |
| 11Nov2011 | 23106 | 991.52  | -7.73606 | 2 R.FAGNFN‡ chr5@4384    | 3.10E-10 | 0.006556 |
| 11Nov2011 | 30866 | 950.99  | 17.90418 | 2 R.M+15.99 chr2@2462    | 2.89E-10 | 0.005657 |
| 11Nov2011 | 30861 | 1124.58 | -5.59827 | 1 K.CTRKCRT chr5@1568    | 5.02E-11 | 0.001251 |
| 11Nov2011 | 25211 | 927.82  | -15.6122 | 3 R.LSKCAAT Splice@chr   | 4.68E-10 | 0.0087   |
| 12Oct2011 | 4313  | 616.85  | -4.55897 | 2 K.QK+14.0‡ chr4@8188   | 3.57E-10 | 0.009942 |
| 11Nov2011 | 3543  | 451.27  | -16.5374 | 2 K.KTLVPTSi chr5@6236   | 1.99E-10 | 0.003725 |
| 11Nov2011 | 3611  | 451.27  | -16.5374 | 2 K.KTLVPTSi chr5@6236   | 4.10E-10 | 0.006531 |
| 11Nov2011 | 6129  | 496.77  | -21.1328 | 2 K.VLMLTSA Splice@chr   | 2.95E-10 | 0.005792 |
| 11Nov2011 | 7089  | 496.77  | -21.1328 | 2 K.VLMLTSA Splice@chr   | 3.09E-10 | 0.00562  |
| 11Nov2011 | 17304 | 565.33  | 5.793462 | 2 R.RSALLCRI Splice@chr  | 1.40E-10 | 0.002589 |
| 11Nov2011 | 16988 | 565.33  | 5.793462 | 2 R.RSALLCRI Splice@chr  | 4.96E-10 | 0.008336 |
| 11Nov2011 | 16875 | 565.33  | 5.793462 | 2 R.RSALLCRI Splice@chr  | 1.60E-10 | 0.003651 |
| 12Oct2011 | 4475  | 403.88  | 1.164244 | 3 K.TVTTMG† Splice@chr   | 3.18E-10 | 0.00824  |
| 12Oct2011 | 11411 | 1044.86 | -5.92503 | 3 _._HCSLELEI chr4@1659  | 1.33E-11 | 2.34E-04 |
| 12Oct2011 | 2459  | 451.26  | -15.25   | 2 K.VVDVWR chrX@1193     | 3.52E-10 | 0.008717 |
| 11Nov2011 | 17765 | 901.95  | -11.2457 | 2 K.SFIKTQK† chr4@1457   | 4.58E-10 | 0.00746  |
| 11Nov2011 | 22887 | 761.61  | -14.9899 | 4 S.RTEDPNL Splice@chr   | 1.29E-13 | 6.55E-05 |
| 11Nov2011 | 22642 | 761.61  | -14.9899 | 4 S.RTEDPNL Splice@chr   | 2.18E-14 | 0        |
| 11Nov2011 | 22583 | 761.61  | -14.9899 | 4 S.RTEDPNL Splice@chr   | 4.37E-13 | 6.73E-05 |
| 11Nov2011 | 22821 | 1015.15 | -9.04986 | 3 S.RTEDPNL Splice@chr   | 2.93E-17 | 0        |
| 11Nov2011 | 19665 | 757.43  | -13.1191 | 2 _._IFFVIICM† chr4@6763 | 1.16E-10 | 0.003225 |

|           |       |         |          |                         |          |          |
|-----------|-------|---------|----------|-------------------------|----------|----------|
| 11Nov2011 | 2854  | 571.32  | -18.7964 | 2 R.LHQRRARF Splice@chr | 3.71E-10 | 0.009753 |
| 11Nov2011 | 2646  | 571.32  | -18.7964 | 2 R.LHQRRARF Splice@chr | 2.94E-10 | 0.007906 |
| 11Nov2011 | 2984  | 571.32  | -18.7964 | 2 R.LHQRRARF Splice@chr | 7.57E-11 | 0.001579 |
| 11Nov2011 | 948   | 451.27  | -21.115  | 3 K.RRRRTVF chr2@5019   | 1.86E-10 | 0.003495 |
| 11Nov2011 | 26844 | 1168.59 | -28.5064 | 3 R.LRKRRSIE chr1@3696  | 1.28E-10 | 0.002551 |
| 11Nov2011 | 33733 | 958.46  | 5.937013 | 1 R.PMRTHC chr3@2413    | 1.49E-11 | 6.78E-05 |
| 12Oct2011 | 2292  | 604.32  | -24.7852 | 2 R.FSAIRDVI chr1@2337  | 3.73E-10 | 0.007916 |
| 11Nov2011 | 4590  | 1046.55 | -12.8427 | 1 _PYSNPISI chr5@1853   | 1.20E-10 | 0.003325 |
| 11Nov2011 | 32228 | 1031.99 | 3.433669 | 2 K.ETGQDLI chr5@1821   | 6.00E-10 | 0.009683 |
| 11Nov2011 | 4689  | 685.86  | -21.3583 | 2 D.VQNKFIH chr5@8670   | 4.64E-10 | 0.009073 |
| 11Nov2011 | 15873 | 880.46  | 8.189425 | 1 K.TAEFAVS chr1@2559   | 3.93E-10 | 0.008319 |
| 11Nov2011 | 35149 | 990.59  | -6.04438 | 1 K.RAKNFKA chr1@3734   | 3.08E-10 | 0.005987 |
| 12Oct2011 | 4124  | 978.49  | -19.4366 | 1 _HKSETFTI chr1@2768   | 3.09E-10 | 0.005703 |
| 11Nov2011 | 9070  | 574.81  | -4.78661 | 2 K.NGPNNQ chrX@1712    | 3.86E-10 | 0.006509 |
| 11Nov2011 | 9269  | 574.81  | -4.78661 | 2 K.NGPNNQ chrX@1712    | 4.14E-10 | 0.008772 |
| 11Nov2011 | 9213  | 574.81  | -4.78661 | 2 K.NGPNNQ chrX@1712    | 3.66E-10 | 0.007874 |
| 11Nov2011 | 9328  | 574.81  | -4.78661 | 2 K.NGPNNQ chrX@1712    | 2.67E-10 | 0.005894 |
| 11Nov2011 | 9285  | 574.81  | -4.78661 | 2 K.NGPNNQ chrX@1712    | 3.04E-10 | 0.00574  |
| 11Nov2011 | 9340  | 574.81  | -4.78661 | 2 K.NGPNNQ chrX@1712    | 3.78E-10 | 0.007155 |
| 11Nov2011 | 9401  | 574.81  | -4.78661 | 2 K.NGPNNQ chrX@1712    | 1.80E-10 | 0.003453 |
| 11Nov2011 | 9018  | 574.81  | -4.78661 | 2 K.NGPNNQ chrX@1712    | 2.87E-10 | 0.005377 |
| 11Nov2011 | 9368  | 574.81  | -4.78661 | 2 K.NGPNNQ chrX@1712    | 3.60E-10 | 0.006744 |
| 11Nov2011 | 9257  | 574.81  | -4.78661 | 2 K.NGPNNQ chrX@1712    | 3.83E-10 | 0.00721  |
| 11Nov2011 | 9204  | 574.81  | -4.78661 | 2 K.NGPNNQ chrX@1712    | 1.34E-10 | 0.003398 |
| 11Nov2011 | 9153  | 574.81  | -4.78661 | 2 K.NGPNNQ chrX@1712    | 4.64E-10 | 0.008817 |
| 11Nov2011 | 9324  | 574.81  | -4.78661 | 2 K.NGPNNQ chrX@1712    | 1.54E-10 | 0.003607 |
| 11Nov2011 | 7368  | 574.81  | -4.78661 | 2 K.NGPNNQ chrX@1712    | 1.11E-10 | 0.003014 |
| 11Nov2011 | 7313  | 574.81  | -4.78661 | 2 K.NGPNNQ chrX@1712    | 2.61E-10 | 0.008013 |
| 11Nov2011 | 16638 | 998     | -25.8764 | 2 R.FFFFMNF Splice@chr  | 4.92E-10 | 0.009528 |
| 12Oct2011 | 7027  | 997.5   | -24.1932 | 2 R.FFFFMNF Splice@chr  | 3.32E-10 | 0.009484 |
| 11Nov2011 | 14616 | 946.96  | 17.59314 | 2 I.ILQKMQN Splice@chr  | 3.28E-10 | 0.005866 |
| 11Nov2011 | 14054 | 890.5   | 21.75237 | 1 R.SSASLNR chr4@1208   | 2.03E-10 | 0.005019 |
| 11Nov2011 | 24283 | 920.5   | -16.5945 | 2 _AEKLHVA chr3@1315    | 2.40E-10 | 0.00512  |
| 11Nov2011 | 17977 | 921.56  | -5.23789 | 2 R.EIYLNIVF chr2@1122  | 5.34E-11 | 0.001459 |
| 12Oct2011 | 2215  | 677.36  | 18.22915 | 2 K.KNAEIDE chr4@1337   | 1.69E-11 | 5.47E-04 |
| 11Nov2011 | 4358  | 586.39  | 3.545039 | 2 K.KKTVIRW chr2@1576   | 4.25E-10 | 0.007871 |
| 11Nov2011 | 4252  | 586.39  | 3.545039 | 2 K.KKTVIRW chr2@1576   | 2.75E-10 | 0.00457  |
| 11Nov2011 | 32562 | 1093.54 | 11.17328 | 1 _EVSEGFV chr1@2217    | 2.35E-10 | 0.004358 |
| 12Oct2011 | 6807  | 1000.17 | -22.2213 | 3 K.SQVFSTA chrX@6089   | 3.74E-12 | 2.95E-04 |
| 12Oct2011 | 7237  | 999.83  | -27.7826 | 3 K.SQVFSTA chrX@6089   | 2.94E-13 | 0        |
| 11Nov2011 | 946   | 419.24  | 2.924803 | 2 _KMGSSAI Splice@chr   | 1.67E-10 | 0.003765 |
| 11Nov2011 | 16151 | 472.28  | -5.76323 | 2 R.NLVKNEV chr2@1203   | 4.27E-10 | 0.008095 |
| 11Nov2011 | 26167 | 1162.13 | 7.674645 | 2 R.KQIWDKI chrX@5848   | 6.53E-11 | 0.001503 |
| 12Oct2011 | 9674  | 693.87  | 17.85329 | 2 R.FFVAPSM chrX@2587   | 6.51E-10 | 0.009779 |
| 11Nov2011 | 33493 | 945.51  | -28.9962 | 2 _QLETGLLI chr5@5568   | 5.46E-10 | 0.008987 |
| 11Nov2011 | 4370  | 411.72  | 25.78417 | 2 K.IYGGGGC chr4@1715   | 1.46E-11 | 3.73E-04 |
| 11Nov2011 | 4462  | 411.72  | 25.78417 | 2 K.IYGGGGC chr4@1715   | 2.33E-13 | 0        |

|           |       |         |          |                          |          |          |
|-----------|-------|---------|----------|--------------------------|----------|----------|
| 11Nov2011 | 4445  | 411.72  | 25.78417 | 2 K.IYGGGGC chr4@1715    | 5.66E-15 | 0        |
| 12Oct2011 | 5081  | 598.32  | -11.62   | 3 _..ENSPNIPI chr5@1895  | 1.26E-10 | 0.002726 |
| 11Nov2011 | 19593 | 644.31  | -17.2437 | 3 _..SWRFMN Splice@chr   | 4.02E-10 | 0.006671 |
| 11Nov2011 | 19464 | 644.31  | -17.2437 | 3 _..SWRFMN Splice@chr   | 2.51E-10 | 0.004707 |
| 11Nov2011 | 18714 | 644.31  | -17.2437 | 3 _..SWRFMN Splice@chr   | 2.48E-10 | 0.00447  |
| 11Nov2011 | 18776 | 644.31  | -17.2437 | 3 _..SWRFMN Splice@chr   | 2.56E-10 | 0.004531 |
| 11Nov2011 | 19956 | 644.31  | -17.2437 | 3 _..SWRFMN Splice@chr   | 1.69E-10 | 0.003789 |
| 11Nov2011 | 20022 | 644.31  | -17.2437 | 3 _..SWRFMN Splice@chr   | 3.27E-10 | 0.006051 |
| 11Nov2011 | 20071 | 644.31  | -17.2437 | 3 _..SWRFMN Splice@chr   | 5.39E-10 | 0.009746 |
| 11Nov2011 | 19862 | 644.31  | -17.2437 | 3 _..SWRFMN Splice@chr   | 2.10E-10 | 0.004142 |
| 11Nov2011 | 19789 | 644.31  | -17.2437 | 3 _..SWRFMN Splice@chr   | 2.12E-10 | 0.004191 |
| 11Nov2011 | 19549 | 644.31  | -17.2437 | 3 _..SWRFMN Splice@chr   | 4.45E-10 | 0.007715 |
| 11Nov2011 | 20084 | 644.31  | -17.2437 | 3 _..SWRFMN Splice@chr   | 2.81E-10 | 0.005688 |
| 11Nov2011 | 19934 | 644.31  | -17.2437 | 3 _..SWRFMN Splice@chr   | 3.03E-10 | 0.005995 |
| 11Nov2011 | 19701 | 644.31  | -17.2437 | 3 _..SWRFMN Splice@chr   | 9.58E-11 | 0.002361 |
| 11Nov2011 | 19489 | 644.31  | -17.2437 | 3 _..SWRFMN Splice@chr   | 4.40E-10 | 0.008452 |
| 11Nov2011 | 19591 | 644.31  | -17.2437 | 3 _..SWRFMN Splice@chr   | 4.21E-10 | 0.008238 |
| 11Nov2011 | 19648 | 644.31  | -17.2437 | 3 _..SWRFMN Splice@chr   | 8.42E-11 | 0.002195 |
| 11Nov2011 | 26734 | 1082.91 | -16.9851 | 3 R.FQNFGNI chrX@5900    | 3.49E-10 | 0.007947 |
| 11Nov2011 | 373   | 730.37  | 18.60649 | 1 K.SSDAPPR chr2@5962    | 3.25E-10 | 0.008578 |
| 11Nov2011 | 335   | 730.37  | 18.60649 | 1 K.SSDAPPR chr2@5962    | 3.25E-10 | 0.006715 |
| 11Nov2011 | 2673  | 527.36  | -26.4379 | 2 K.K+14.016 chr1@3857   | 8.31E-11 | 0.00254  |
| 11Nov2011 | 23773 | 1210.17 | 17.59981 | 2 K.TTK+14.0 chrX@8445   | 6.80E-11 | 0.002056 |
| 11Nov2011 | 15535 | 1038.54 | -18.0008 | 2 R.KYQK+14 chr2@1496    | 7.48E-11 | 9.57E-04 |
| 12Oct2011 | 7946  | 947.99  | -25.0512 | 2 F.HLK+14.0 Splice@chr  | 3.93E-10 | 0.008941 |
| 11Nov2011 | 24292 | 742.89  | 23.75316 | 2 R.RM+15.9 Splice@chr   | 4.22E-10 | 0.007157 |
| 11Nov2011 | 23765 | 742.89  | 23.75316 | 2 R.RM+15.9 chr1@8097    | 2.77E-10 | 0.006333 |
| 11Nov2011 | 28517 | 1182.15 | -10.3348 | 2 A.ESFKFLFL chrX@1760   | 6.55E-10 | 0.007367 |
| 11Nov2011 | 31700 | 1048.51 | -0.75703 | 3 K.DKFFSELF chrX@2279   | 1.78E-10 | 0.003408 |
| 11Nov2011 | 16143 | 924.98  | -15.1009 | 2 Y.IPPK+14.0 Splice@chr | 8.72E-11 | 0.002061 |
| 11Nov2011 | 27749 | 1001.51 | -23.6692 | 3 R.RMMAFV Splice@chr    | 2.80E-10 | 0.005344 |
| 11Nov2011 | 5911  | 415.47  | 16.93559 | 4 R.QNADLPI chr3@1171    | 2.51E-10 | 0.00534  |
| 11Nov2011 | 6432  | 402.22  | 1.521271 | 3 R.TGDVDTC chr1@7589    | 3.48E-10 | 0.004287 |
| 11Nov2011 | 18094 | 1172.67 | -20.9048 | 1 R.DATRGA\ chr3@1575    | 4.25E-10 | 0.009246 |
| 11Nov2011 | 29276 | 984.55  | -22.1741 | 1 R.RKCRVHk chr1@9359    | 3.83E-10 | 0.007197 |
| 11Nov2011 | 15637 | 717.04  | 7.989016 | 3 K.YKINTDEI chr2@5566   | 4.80E-10 | 0.008272 |
| 11Nov2011 | 14375 | 717.04  | 7.989016 | 3 K.YKINTDEI chr2@5566   | 4.67E-10 | 0.009861 |
| 11Nov2011 | 28451 | 1220.96 | 28.1097  | 3 _..DGSERW Splice@chr   | 2.76E-10 | 0.005288 |
| 11Nov2011 | 3469  | 532.3   | 18.11314 | 2 R.RDLTFSA\ chrX@6816   | 3.99E-12 | 4.03E-04 |
| 12Oct2011 | 8657  | 1055.67 | 4.166784 | 2 K.REK+14.0 chr5@1140   | 1.97E-10 | 0.004873 |
| 11Nov2011 | 28802 | 658.4   | -22.1893 | 2 _..LLLLHHTS Splice@chr | 2.56E-10 | 0.003972 |
| 11Nov2011 | 27701 | 1002.02 | 19.53256 | 4 _..K+14.016 chr1@5245  | 7.00E-11 | 0.001324 |
| 11Nov2011 | 28327 | 1002.03 | 29.5349  | 4 _..K+14.016 chr1@5245  | 2.19E-10 | 0.002851 |
| 11Nov2011 | 18802 | 779.44  | 12.54541 | 1 R.LLSIGGG\ chr3@1550   | 1.18E-10 | 0.002519 |
| 11Nov2011 | 18947 | 779.44  | 12.54541 | 1 R.LLSIGGG\ chr3@1550   | 1.18E-10 | 0.002203 |
| 11Nov2011 | 18890 | 779.44  | 12.54541 | 1 R.LLSIGGG\ chr3@1550   | 3.76E-10 | 0.007105 |
| 11Nov2011 | 18829 | 779.44  | 12.54541 | 1 R.LLSIGGG\ chr3@1550   | 1.21E-10 | 0.003654 |

|           |       |         |          |                         |          |          |
|-----------|-------|---------|----------|-------------------------|----------|----------|
| 11Nov2011 | 18521 | 779.44  | 12.54541 | 1 R.LLSIGGG\ chr3@1550  | 1.18E-10 | 0.002997 |
| 11Nov2011 | 27024 | 978.02  | -3.53033 | 2 R.DII RQLTA chrX@9584 | 3.83E-10 | 0.006562 |
| 11Nov2011 | 29221 | 978.02  | -3.53033 | 2 R.DII RQLTA chrX@9584 | 4.90E-10 | 0.009847 |
| 11Nov2011 | 29152 | 978.02  | -3.53033 | 2 R.DII RQLTA chrX@9584 | 4.63E-10 | 0.0093   |
| 11Nov2011 | 29333 | 978.02  | -3.53033 | 2 R.DII RQLTA chrX@9584 | 3.08E-10 | 0.005788 |
| 11Nov2011 | 28783 | 978.02  | -3.53033 | 2 R.DII RQLTA chrX@9584 | 3.34E-10 | 0.005783 |
| 11Nov2011 | 28986 | 978.02  | -3.53033 | 2 R.DII RQLTA chrX@9584 | 4.76E-10 | 0.008356 |
| 11Nov2011 | 27937 | 978.02  | -3.53033 | 2 R.DII RQLTA chrX@9584 | 1.28E-10 | 0.003127 |
| 12Oct2011 | 10208 | 1035.54 | -4.78136 | 1 R.ISGSKNL\ chrX@1365  | 3.76E-10 | 0.008769 |
| 11Nov2011 | 3745  | 781.41  | 13.97101 | 2 _ESEVTVN Splice@chr   | 1.34E-10 | 0.003008 |
| 11Nov2011 | 23821 | 1069.19 | 6.345157 | 3 R.QLVVMG Splice@chr   | 1.05E-12 | 0        |
| 11Nov2011 | 23839 | 1069.19 | 6.345157 | 3 R.QLVVMG Splice@chr   | 8.07E-14 | 0        |
| 11Nov2011 | 23932 | 1069.18 | -2.95247 | 3 R.QLVVMG Splice@chr   | 8.91E-12 | 2.38E-04 |
| 11Nov2011 | 34749 | 1069.18 | -2.95247 | 3 R.QLVVMG Splice@chr   | 7.54E-13 | 7.85E-05 |
| 11Nov2011 | 34879 | 1069.17 | -12.2501 | 3 R.QLVVMG Splice@chr   | 1.01E-11 | 2.68E-04 |
| 11Nov2011 | 34776 | 1069.18 | -2.95247 | 3 R.QLVVMG Splice@chr   | 9.02E-12 | 2.03E-04 |
| 11Nov2011 | 31513 | 1069.19 | 6.345157 | 3 R.QLVVMG Splice@chr   | 4.62E-14 | 0        |
| 11Nov2011 | 22381 | 1069.18 | -2.95247 | 3 R.QLVVMG Splice@chr   | 4.82E-13 | 6.55E-05 |
| 11Nov2011 | 22325 | 1069.18 | -2.95247 | 3 R.QLVVMG Splice@chr   | 1.42E-14 | 0        |
| 11Nov2011 | 22561 | 1069.18 | -2.95247 | 3 R.QLVVMG Splice@chr   | 3.57E-16 | 0        |
| 11Nov2011 | 37827 | 1069.18 | -2.95247 | 3 R.QLVVMG Splice@chr   | 2.04E-11 | 5.53E-04 |
| 11Nov2011 | 35977 | 1069.18 | -2.95247 | 3 R.QLVVMG Splice@chr   | 9.19E-15 | 0        |
| 11Nov2011 | 35820 | 1069.18 | -2.95247 | 3 R.QLVVMG Splice@chr   | 2.47E-13 | 0        |
| 11Nov2011 | 36708 | 1069.18 | -2.95247 | 3 R.QLVVMG Splice@chr   | 1.58E-14 | 0        |
| 11Nov2011 | 36780 | 1069.18 | -2.95247 | 3 R.QLVVMG Splice@chr   | 1.22E-12 | 0        |
| 11Nov2011 | 22398 | 1069.18 | -2.95247 | 3 R.QLVVMG Splice@chr   | 4.14E-16 | 0        |
| 11Nov2011 | 22513 | 1069.18 | -2.95247 | 3 R.QLVVMG Splice@chr   | 4.29E-15 | 0        |
| 11Nov2011 | 22330 | 1069.18 | -2.95247 | 3 R.QLVVMG Splice@chr   | 9.06E-15 | 0        |
| 11Nov2011 | 35930 | 1069.18 | -2.95247 | 3 R.QLVVMG Splice@chr   | 4.60E-15 | 0        |
| 11Nov2011 | 36025 | 1069.18 | -2.95247 | 3 R.QLVVMG Splice@chr   | 3.73E-11 | 8.44E-04 |
| 11Nov2011 | 35893 | 1069.18 | -2.95247 | 3 R.QLVVMG Splice@chr   | 5.05E-13 | 6.73E-05 |
| 11Nov2011 | 35973 | 1069.17 | -12.2501 | 3 R.QLVVMG Splice@chr   | 1.35E-13 | 6.73E-05 |
| 11Nov2011 | 22980 | 1069.18 | -2.95247 | 3 R.QLVVMG Splice@chr   | 1.36E-12 | 6.95E-05 |
| 11Nov2011 | 22398 | 1069.18 | -2.95247 | 3 R.QLVVMG Splice@chr   | 6.04E-15 | 0        |
| 11Nov2011 | 37093 | 1069.19 | 6.345157 | 3 R.QLVVMG Splice@chr   | 1.46E-11 | 3.80E-04 |
| 11Nov2011 | 37047 | 1069.18 | -2.95247 | 3 R.QLVVMG Splice@chr   | 3.56E-14 | 0        |
| 11Nov2011 | 37119 | 1069.18 | -2.95247 | 3 R.QLVVMG Splice@chr   | 2.79E-13 | 6.95E-05 |
| 11Nov2011 | 36166 | 1069.18 | -2.95247 | 3 R.QLVVMG Splice@chr   | 1.81E-13 | 6.95E-05 |
| 11Nov2011 | 22273 | 1069.17 | -12.2501 | 3 R.QLVVMG Splice@chr   | 1.14E-11 | 2.56E-04 |
| 11Nov2011 | 36249 | 1069.18 | -2.95247 | 3 R.QLVVMG Splice@chr   | 2.47E-15 | 0        |
| 11Nov2011 | 34713 | 1069.18 | -2.95247 | 3 R.QLVVMG Splice@chr   | 4.41E-15 | 0        |
| 11Nov2011 | 22133 | 1069.18 | -2.95247 | 3 R.QLVVMG Splice@chr   | 2.02E-14 | 0        |
| 11Nov2011 | 34543 | 1069.18 | -2.95247 | 3 R.QLVVMG Splice@chr   | 1.17E-12 | 7.08E-05 |
| 11Nov2011 | 35506 | 1069.18 | -2.95247 | 3 R.QLVVMG Splice@chr   | 8.13E-12 | 1.37E-04 |
| 11Nov2011 | 34650 | 1069.18 | -2.95247 | 3 R.QLVVMG Splice@chr   | 5.71E-16 | 0        |
| 11Nov2011 | 22008 | 1069.18 | -2.95247 | 3 R.QLVVMG Splice@chr   | 9.28E-13 | 7.08E-05 |
| 11Nov2011 | 22194 | 1069.18 | -2.95247 | 3 R.QLVVMG Splice@chr   | 5.47E-15 | 0        |

|           |       |         |          |                         |          |          |
|-----------|-------|---------|----------|-------------------------|----------|----------|
| 11Nov2011 | 35483 | 1069.18 | -2.95247 | 3 R.QLVVMG Splice@chr   | 4.94E-11 | 0.001318 |
| 11Nov2011 | 34760 | 1069.18 | -2.95247 | 3 R.QLVVMG Splice@chr   | 2.20E-14 | 0        |
| 11Nov2011 | 26149 | 1069.18 | -2.95247 | 3 R.QLVVMG Splice@chr   | 1.65E-13 | 0        |
| 11Nov2011 | 26199 | 1069.19 | 6.345157 | 3 R.QLVVMG Splice@chr   | 1.54E-14 | 0        |
| 11Nov2011 | 31017 | 1194.61 | 3.607464 | 2 K.TKQEKKF chr4@1114   | 4.57E-10 | 0.008436 |
| 11Nov2011 | 17170 | 712.4   | -6.94949 | 2 R.K+14.016 chr3@2305  | 1.20E-10 | 0.003325 |
| 11Nov2011 | 32430 | 883.02  | 18.31534 | 2 R.GK+14.01 chr5@5467  | 2.50E-10 | 0.004651 |
| 12Oct2011 | 188   | 880.46  | 8.189425 | 1 R.DIDAYKR chr3@6737   | 2.90E-10 | 0.006051 |
| 11Nov2011 | 5841  | 875.49  | -28.1767 | 2 K.SK+14.01 chr4@9834  | 6.71E-11 | 0.001779 |
| 11Nov2011 | 5866  | 543.81  | -1.012   | 2 K.QMLGFIH Splice@chr  | 9.70E-11 | 0.00228  |
| 11Nov2011 | 14931 | 908.47  | -28.0463 | 2 _RISSRAVF Splice@chr  | 2.82E-10 | 0.005132 |
| 11Nov2011 | 13950 | 908.47  | -28.0463 | 2 _RISSRAVF Splice@chr  | 1.99E-10 | 0.00374  |
| 12Oct2011 | 7109  | 742.72  | 23.62928 | 3 R.KCNPMC chr5@1477    | 3.70E-10 | 0.008703 |
| 11Nov2011 | 3056  | 522.29  | -19.98   | 2 K.LDTRAPE chrX@6325   | 3.14E-10 | 0.006783 |
| 11Nov2011 | 3413  | 451.27  | -29.0079 | 2 R.TKQAGKI chrX@1462   | 3.21E-10 | 0.005239 |
| 12Oct2011 | 10365 | 914.18  | 14.01994 | 3 K.INTKKKEI Splice@chr | 4.65E-10 | 0.009766 |
| 12Oct2011 | 10330 | 1347.69 | 11.74904 | 1 K.FFDITSIM chr3@1104  | 4.05E-10 | 0.009784 |
| 11Nov2011 | 9151  | 833.45  | -2.49289 | 1 K.FPVEVSR chr2@3444   | 5.21E-10 | 0.009403 |
| 11Nov2011 | 8750  | 833.44  | -14.5174 | 1 K.FPVEVSR chr2@3444   | 5.83E-10 | 0.009852 |
| 11Nov2011 | 15290 | 958.45  | 6.821097 | 2 K.LM+15.95 Splice@chr | 2.39E-10 | 0.006498 |
| 11Nov2011 | 26232 | 1316.65 | -14.4741 | 2 L.ERNQKFK chr4@5658   | 4.48E-10 | 0.009758 |
| 11Nov2011 | 34979 | 1293.62 | -23.3254 | 2 K.K+14.016 chr2@1315  | 6.19E-10 | 0.00966  |
| 11Nov2011 | 27812 | 1311.17 | -28.3235 | 2 _KFPEIFW chr1@3255    | 2.05E-10 | 0.005143 |
| 11Nov2011 | 148   | 762.84  | -9.53375 | 2 R.EKQTEM chrX@1177    | 2.95E-10 | 0.006484 |
| 12Oct2011 | 9743  | 1075.07 | 23.226   | 2 R.FHK+14.01 chr2@2016 | 1.35E-10 | 0.003603 |
| 12Oct2011 | 7392  | 751.72  | -25.9079 | 3 R.RDECDHI chrX@5494   | 1.72E-10 | 0.002751 |
| 11Nov2011 | 7395  | 532.28  | -11.833  | 4 K.K+14.016 chrX@5480  | 4.04E-10 | 0.006263 |
| 12Oct2011 | 3650  | 679.37  | -20.4237 | 2 I.EICRARQI chr2@2604  | 2.77E-10 | 0.007133 |
| 11Nov2011 | 31377 | 1159.94 | -20.7847 | 3 K.SHKNDK Splice@chr   | 5.10E-10 | 0.009295 |
| 11Nov2011 | 9080  | 869.48  | -18.0613 | 1 _SSRAHAL chrX@3325    | 3.83E-10 | 0.009943 |
| 11Nov2011 | 9616  | 869.48  | -18.0613 | 1 _SSRAHAL chrX@3325    | 2.14E-10 | 0.004276 |
| 12Oct2011 | 6161  | 694.38  | -0.39486 | 2 _EINGVKS chr2@1445    | 3.92E-11 | 0.00263  |
| 11Nov2011 | 2297  | 463.24  | 16.83594 | 2 _NTMFREI Splice@chr   | 3.18E-10 | 0.008159 |
| 11Nov2011 | 2372  | 463.24  | 16.83594 | 2 _NTMFREI Splice@chr   | 1.49E-10 | 0.002989 |
| 12Oct2011 | 943   | 1143.51 | -5.63756 | 2 _M+15.99 chr1@9885    | 3.14E-10 | 0.007263 |
| 12Oct2011 | 7575  | 1060.05 | 5.911171 | 2 Q.DCHDVSI Splice@chr  | 1.91E-10 | 0.004665 |
| 11Nov2011 | 3359  | 415.73  | 18.10238 | 2 R.VDDTPKF chrX@3515   | 1.03E-10 | 0.002407 |
| 11Nov2011 | 14113 | 1164.61 | 2.622688 | 2 K.LK+14.01 chr2@9425  | 2.60E-10 | 0.00459  |
| 11Nov2011 | 16328 | 738.06  | 27.27278 | 3 _SGALESFI chr4@1457   | 1.74E-10 | 0.004618 |
| 12Oct2011 | 4109  | 1053.52 | -16.2369 | 2 _MKNTYFI chr2@3150    | 1.27E-10 | 0.00478  |
| 11Nov2011 | 33382 | 930.55  | 15.71262 | 1 K.LAWRIDR chr2@5855   | 3.00E-10 | 0.005723 |
| 12Oct2011 | 3407  | 824.91  | -17.4827 | 2 R.EKNAKFT Splice@chr  | 2.04E-10 | 0.004332 |
| 11Nov2011 | 7701  | 695.87  | -16.8646 | 2 ?.EHRSVNS Splice@chr  | 4.11E-10 | 0.007087 |
| 11Nov2011 | 11393 | 1059.97 | -7.58176 | 2 R.SSGSPVK Splice@chr  | 5.62E-10 | 0.009652 |
| 12Oct2011 | 8081  | 1143.59 | -25.1964 | 2 K.CKKTVDL Splice@chr  | 3.89E-10 | 0.009784 |
| 12Oct2011 | 10356 | 1143.59 | -25.1964 | 2 K.CKKTVDL Splice@chr  | 3.15E-10 | 0.007528 |
| 11Nov2011 | 14473 | 667.36  | -28.0929 | 2 R.M+15.99 chr4@3656   | 4.48E-10 | 0.008503 |

|           |       |         |          |                         |          |          |
|-----------|-------|---------|----------|-------------------------|----------|----------|
| 11Nov2011 | 27753 | 1023.55 | 15.14003 | 2 K.K+14.016 chr1@100   | 1.38E-11 | 6.78E-05 |
| 11Nov2011 | 28744 | 1023.55 | 15.14003 | 2 K.K+14.016 chr1@100   | 1.86E-10 | 0.003178 |
| 11Nov2011 | 19424 | 724.38  | 7.727294 | 2 R.QIDENM- Splice@chr  | 2.75E-10 | 0.007449 |
| 11Nov2011 | 22221 | 675.67  | -23.6222 | 3 H.YQSNISR chr5@116    | 2.09E-10 | 0.004659 |
| 11Nov2011 | 1107  | 416.27  | 22.73895 | 2 R.VIVSTVGI chrX@100   | 1.93E-10 | 0.004829 |
| 11Nov2011 | 1252  | 416.27  | 22.73895 | 2 R.VIVSTVGI chrX@100   | 2.55E-10 | 0.004905 |
| 12Oct2011 | 527   | 411.72  | -23.4052 | 2 R.NPVFAFK Splice@chr  | 2.37E-10 | 0.006419 |
| 12Oct2011 | 4734  | 995.51  | 27.47992 | 2 K.NVFQFNI chr5@113    | 3.11E-10 | 0.008191 |
| 12Oct2011 | 6186  | 840.92  | -8.39688 | 2 F.FM+15.9! Splice@chr | 2.17E-10 | 0.004927 |
| 12Oct2011 | 4473  | 840.92  | -8.39688 | 2 F.FM+15.9! Splice@chr | 1.53E-11 | 2.34E-04 |
| 12Oct2011 | 6339  | 840.92  | -8.39688 | 2 F.FM+15.9! Splice@chr | 3.01E-10 | 0.007335 |
| 12Oct2011 | 4671  | 840.92  | -8.39688 | 2 F.FM+15.9! Splice@chr | 3.34E-11 | 0.001386 |
| 12Oct2011 | 4191  | 840.92  | -8.39688 | 2 F.FM+15.9! Splice@chr | 5.49E-11 | 0.001681 |
| 12Oct2011 | 4283  | 840.92  | -8.39688 | 2 F.FM+15.9! Splice@chr | 7.06E-11 | 0.001832 |
| 12Oct2011 | 4052  | 840.92  | -8.39688 | 2 F.FM+15.9! Splice@chr | 5.27E-11 | 0.001761 |
| 12Oct2011 | 6068  | 840.92  | -8.39688 | 2 F.FM+15.9! Splice@chr | 2.92E-10 | 0.007553 |
| 12Oct2011 | 6111  | 840.92  | -8.39688 | 2 F.FM+15.9! Splice@chr | 3.10E-10 | 0.008191 |
| 12Oct2011 | 4407  | 840.92  | -8.39688 | 2 F.FM+15.9! Splice@chr | 8.50E-11 | 0.001741 |
| 12Oct2011 | 4346  | 840.91  | -20.3215 | 2 F.FM+15.9! Splice@chr | 1.17E-10 | 0.002642 |
| 12Oct2011 | 4482  | 840.92  | -8.39688 | 2 F.FM+15.9! Splice@chr | 6.48E-11 | 0.002115 |
| 12Oct2011 | 6130  | 840.92  | -8.39688 | 2 F.FM+15.9! Splice@chr | 3.11E-10 | 0.009555 |
| 12Oct2011 | 7214  | 840.92  | -8.39688 | 2 F.FM+15.9! Splice@chr | 1.62E-10 | 0.003381 |
| 12Oct2011 | 5231  | 840.92  | -8.39688 | 2 F.FM+15.9! Splice@chr | 5.25E-11 | 0.001513 |
| 12Oct2011 | 7310  | 840.92  | -8.39688 | 2 F.FM+15.9! Splice@chr | 6.29E-11 | 0.001513 |
| 12Oct2011 | 7258  | 840.92  | -8.39688 | 2 F.FM+15.9! Splice@chr | 2.29E-10 | 0.004898 |
| 12Oct2011 | 5329  | 840.92  | -8.39688 | 2 F.FM+15.9! Splice@chr | 3.55E-10 | 0.006164 |
| 12Oct2011 | 5417  | 840.91  | -20.3215 | 2 F.FM+15.9! Splice@chr | 8.07E-11 | 0.001498 |
| 12Oct2011 | 7260  | 840.92  | -8.39688 | 2 F.FM+15.9! Splice@chr | 4.00E-10 | 0.008125 |
| 12Oct2011 | 7337  | 840.92  | -8.39688 | 2 F.FM+15.9! Splice@chr | 3.59E-10 | 0.006333 |
| 12Oct2011 | 7295  | 840.92  | -8.39688 | 2 F.FM+15.9! Splice@chr | 2.52E-10 | 0.004215 |
| 12Oct2011 | 4001  | 840.92  | -8.39688 | 2 F.FM+15.9! Splice@chr | 2.06E-10 | 0.003229 |
| 12Oct2011 | 5404  | 840.92  | -8.39688 | 2 F.FM+15.9! Splice@chr | 1.25E-10 | 0.002201 |
| 12Oct2011 | 5461  | 840.92  | -8.39688 | 2 F.FM+15.9! Splice@chr | 5.83E-11 | 0.001463 |
| 12Oct2011 | 4029  | 840.92  | -8.39688 | 2 F.FM+15.9! Splice@chr | 3.24E-10 | 0.006774 |
| 12Oct2011 | 3968  | 840.92  | -8.39688 | 2 F.FM+15.9! Splice@chr | 3.64E-10 | 0.007256 |
| 12Oct2011 | 4241  | 840.92  | -8.39688 | 2 F.FM+15.9! Splice@chr | 1.22E-10 | 0.003673 |
| 12Oct2011 | 5568  | 840.92  | -8.39688 | 2 F.FM+15.9! Splice@chr | 2.05E-10 | 0.005429 |
| 12Oct2011 | 4395  | 840.92  | -8.39688 | 2 F.FM+15.9! Splice@chr | 1.14E-10 | 0.001987 |
| 12Oct2011 | 4598  | 840.91  | -20.3215 | 2 F.FM+15.9! Splice@chr | 9.15E-11 | 0.002901 |
| 12Oct2011 | 4637  | 840.91  | -20.3215 | 2 F.FM+15.9! Splice@chr | 1.71E-10 | 0.005442 |
| 12Oct2011 | 6243  | 840.92  | -8.39688 | 2 F.FM+15.9! Splice@chr | 2.76E-10 | 0.008066 |
| 12Oct2011 | 4115  | 840.92  | -8.39688 | 2 F.FM+15.9! Splice@chr | 1.65E-11 | 5.96E-04 |
| 11Nov2011 | 13473 | 1257.64 | 4.036292 | 1 K.FEHEYIK chr4@169    | 1.66E-10 | 0.002778 |
| 11Nov2011 | 19873 | 946.96  | -25.2722 | 2 K.HFCTIINT chr3@185   | 3.92E-10 | 0.008319 |
| 11Nov2011 | 15258 | 656.32  | -24.5064 | 3 K.CAVTSRL Splice@chr  | 2.29E-10 | 0.00492  |
| 11Nov2011 | 24390 | 1162.13 | -16.3801 | 2 R.QSRSRQS Splice@chr  | 2.81E-11 | 6.80E-04 |
| 11Nov2011 | 14775 | 764.04  | -1.39934 | 2 _K.MVKK+! Splice@chr  | 4.42E-10 | 0.008343 |

|           |       |         |          |                         |          |          |
|-----------|-------|---------|----------|-------------------------|----------|----------|
| 11Nov2011 | 16286 | 764.04  | -1.39934 | 2 _..KMVKK+ Splice@chr  | 7.18E-11 | 0.001447 |
| 11Nov2011 | 36780 | 960.55  | -1.90826 | 1 K.ISVEKWG chr5@1586   | 1.33E-10 | 0.002944 |
| 12Oct2011 | 13170 | 1043.9  | -2.34099 | 3 S.NLNIQVQ chrX@6707   | 3.49E-10 | 0.006164 |
| 12Oct2011 | 13303 | 1280.24 | 11.45109 | 2 K.RWM+15 chrX@1284    | 2.87E-10 | 0.005546 |
| 11Nov2011 | 770   | 559.32  | -20.7705 | 2 K.RSLAGRK chr5@1870   | 5.53E-10 | 0.008352 |
| 12Oct2011 | 10938 | 1075.07 | 10.37678 | 2 N.TYWLRH chr2@6387    | 2.94E-10 | 0.008454 |
| 11Nov2011 | 11046 | 720.89  | 28.12808 | 2 _..QLNSEHV chr5@2858  | 5.29E-10 | 0.009716 |
| 11Nov2011 | 10294 | 720.89  | 28.12808 | 2 _..QLNSEHV chr5@2858  | 2.68E-10 | 0.005413 |
| 12Oct2011 | 5105  | 720.88  | 14.21327 | 2 _..QLNSEHV chr5@2858  | 4.28E-10 | 0.009463 |
| 11Nov2011 | 20615 | 1049.03 | 5.15762  | 2 K.DRMLAS Splice@chr   | 3.97E-10 | 0.006935 |
| 11Nov2011 | 21261 | 1049.03 | 5.15762  | 2 K.DRMLAS Splice@chr   | 6.07E-10 | 0.00672  |
| 12Oct2011 | 2588  | 553.3   | -21.439  | 2 R.RSTFPAIV chr1@9257  | 1.87E-10 | 0.004947 |
| 11Nov2011 | 26850 | 1047.56 | -28.0761 | 1 R.RGWSKR chr3@4875    | 4.08E-10 | 0.008569 |
| 11Nov2011 | 26901 | 1047.56 | -28.0761 | 1 R.RGWSKR chr3@4875    | 2.30E-10 | 0.005457 |
| 11Nov2011 | 26984 | 1047.57 | -18.6194 | 1 R.RGWSKR chr3@4875    | 3.04E-10 | 0.00574  |
| 11Nov2011 | 26793 | 1047.56 | -28.0761 | 1 R.RGWSKR chr3@4875    | 2.52E-10 | 0.005332 |
| 12Oct2011 | 7541  | 884.51  | 6.286611 | 2 K.K+14.016 chr1@2335  | 1.52E-10 | 0.002473 |
| 11Nov2011 | 8246  | 615.34  | -2.73266 | 2 K.K+14.016 chr4@1159  | 3.37E-10 | 0.00612  |
| 11Nov2011 | 5802  | 740.33  | 0.581581 | 1 K.ENEGYK.I Splice@chr | 4.78E-10 | 0.009401 |
| 11Nov2011 | 29571 | 1144.06 | -10.1453 | 2 R.TSHLPFPI chrX@1614  | 2.55E-10 | 0.00353  |
| 12Oct2011 | 5740  | 744.06  | -16.9756 | 3 R.KAPRIEK chr5@1937   | 1.95E-10 | 0.005828 |
| 11Nov2011 | 31733 | 1261.22 | 25.22062 | 2 K.SKTIFNIIF chr4@9626 | 1.91E-10 | 0.003779 |
| 11Nov2011 | 3455  | 795.43  | 8.233937 | 1 R.FANFPAK chr4@1060   | 6.09E-10 | 0.00672  |
| 12Oct2011 | 13673 | 998.88  | 15.68493 | 3 _..YSGKNTF chr5@4535  | 8.76E-11 | 0.001498 |
| 12Oct2011 | 96    | 496.25  | 7.157565 | 2 R.ETEMATF chr2@7152   | 2.56E-10 | 0.004768 |
| 11Nov2011 | 34197 | 1172.54 | -11.1142 | 3 R.GHDHVS chr5@5827    | 6.11E-10 | 0.00985  |
| 11Nov2011 | 19200 | 801.42  | 16.82632 | 2 K.GKHWTE chrX@1014    | 3.14E-10 | 0.005216 |
| 12Oct2011 | 4967  | 609.35  | -1.15298 | 2 K.KNDDEK chrX@6216    | 1.86E-10 | 0.003903 |
| 11Nov2011 | 15744 | 1064.5  | 23.91632 | 2 _..SDSSGK+ Splice@chr | 2.00E-10 | 0.003708 |
| 11Nov2011 | 19199 | 1044.08 | -25.7459 | 2 K.EFFTKVAI chr1@1025  | 6.00E-10 | 0.009981 |
| 12Oct2011 | 10923 | 600.31  | -4.27742 | 2 R.QHKPQT chrX@1308    | 4.52E-10 | 0.009645 |
| 11Nov2011 | 8423  | 779.4   | 15.23452 | 1 R.FGAEAG chr2@1212    | 1.54E-11 | 4.72E-04 |
| 12Oct2011 | 8799  | 763.4   | 1.62949  | 3 R.TFLPHFF chr4@1096   | 3.62E-10 | 0.009563 |
| 11Nov2011 | 12203 | 532.28  | 9.190877 | 2 K.TTEFPIAE chr5@1064  | 3.30E-10 | 0.005921 |
| 12Oct2011 | 10708 | 810.75  | -22.6962 | 3 K.KISK+14.( chr3@8358 | 1.51E-10 | 0.004895 |
| 11Nov2011 | 5609  | 473.74  | -13.0401 | 2 R.EIEGGVTI chr1@7914  | 2.12E-10 | 0.003878 |
| 11Nov2011 | 25957 | 838.42  | -0.72885 | 2 R.FSLEGIDF Splice@chr | 5.29E-16 | 0        |
| 11Nov2011 | 5645  | 452.27  | -27.4164 | 2 R.RSTAAKIF chr1@3584  | 3.29E-10 | 0.007058 |
| 11Nov2011 | 25281 | 1124.59 | 9.734324 | 1 K.MM+15. chr4@1389    | 3.43E-10 | 0.008377 |
| 11Nov2011 | 9945  | 599.34  | 4.136635 | 2 _..K+14.016 chr5@9670 | 3.58E-10 | 0.009006 |
| 11Nov2011 | 25588 | 874.51  | 16.39638 | 2 M.KK+14.0 Splice@chr  | 2.27E-10 | 0.004866 |
| 11Nov2011 | 10940 | 802.45  | 23.05369 | 2 R.SRWVRA Splice@chr   | 4.89E-10 | 0.009108 |
| 11Nov2011 | 21059 | 989.57  | 20.15071 | 1 R.NQLIPEFI chr4@1377  | 3.83E-10 | 0.009802 |
| 11Nov2011 | 33824 | 1049.03 | 14.94656 | 2 F.QFFHEIQI chrX@1929  | 5.09E-10 | 0.008956 |
| 11Nov2011 | 30538 | 1049.03 | 14.94656 | 2 F.QFFHEIQI chrX@1929  | 2.22E-10 | 0.004044 |
| 11Nov2011 | 27186 | 703.88  | 26.89743 | 2 R.EMESGGI chrX@1686   | 1.45E-10 | 0.003185 |
| 12Oct2011 | 10564 | 858.11  | -22.0115 | 3 _..YLIFQKM chr2@6537  | 6.10E-10 | 0.008896 |

|           |       |         |          |                          |          |          |
|-----------|-------|---------|----------|--------------------------|----------|----------|
| 11Nov2011 | 29188 | 1229.16 | 1.815549 | 2 F.SSSKSPEN chr2@2228   | 4.36E-10 | 0.008025 |
| 11Nov2011 | 23006 | 683.01  | -2.35678 | 3 K.GFENLSP chrX@2517    | 9.94E-11 | 0.003332 |
| 11Nov2011 | 3619  | 805.37  | 0.986443 | 1 K.ESSEPTR. chr5@1511   | 2.75E-10 | 0.005075 |
| 12Oct2011 | 3521  | 1013.48 | -7.77648 | 1 _._FFQGQM Splice@chr   | 4.04E-10 | 0.008125 |
| 11Nov2011 | 35425 | 1002.6  | 0.548444 | 1 K.IMKRKNK chr2@9591    | 2.65E-10 | 0.005451 |
| 11Nov2011 | 7473  | 632.84  | 19.19246 | 2 C.QVQNQR chr5@1934     | 1.51E-10 | 0.003772 |
| 11Nov2011 | 8081  | 632.84  | 19.19246 | 2 C.QVQNQR chr5@1934     | 2.59E-10 | 0.006856 |
| 11Nov2011 | 7835  | 632.84  | 19.19246 | 2 C.QVQNQR chr5@1934     | 5.89E-11 | 0.001856 |
| 11Nov2011 | 7973  | 632.84  | 19.19246 | 2 C.QVQNQR chr5@1934     | 2.22E-10 | 0.006618 |
| 11Nov2011 | 8320  | 632.84  | 19.19246 | 2 C.QVQNQR chr5@1934     | 2.69E-10 | 0.005413 |
| 12Oct2011 | 13519 | 1041.53 | -26.1431 | 2 F.K+14.016 chr3@8906   | 7.99E-11 | 0.002056 |
| 12Oct2011 | 5952  | 971.01  | -27.5594 | 2 V.ELEQLVQ Splice@chr   | 2.82E-10 | 0.005546 |
| 11Nov2011 | 21703 | 682.34  | -21.5888 | 2 R.DLFNCNF chr5@1711    | 2.27E-10 | 0.00446  |
| 12Oct2011 | 6970  | 858.95  | -19.4212 | 2 R.RSSTETV\ Splice@chr  | 2.71E-10 | 0.008276 |
| 12Oct2011 | 3932  | 1120.62 | -5.99656 | 1 R.TEFWRLL chr4@3264    | 1.14E-10 | 0.002062 |
| 12Oct2011 | 2670  | 582.3   | 5.879985 | 3 K.FHFPLFEI chrX@1260   | 4.20E-10 | 0.009331 |
| 11Nov2011 | 9223  | 471.29  | 11.6305  | 2 _._KNQKTPF chrX@1679   | 2.34E-10 | 0.005081 |
| 11Nov2011 | 33685 | 532.02  | 14.1744  | 4 R.WTRSVH\ chr2@1084    | 4.10E-10 | 0.007536 |
| 12Oct2011 | 3980  | 544.63  | 2.73503  | 3 K.PTNQK+1 Splice@chr   | 4.83E-10 | 0.00991  |
| 12Oct2011 | 2532  | 480.75  | -3.6259  | 2 R.WRAWW chr2@9736      | 4.22E-10 | 0.009583 |
| 12Oct2011 | 6457  | 766.49  | -5.30438 | 2 K.KIIMEQI chr1@1044    | 3.77E-10 | 0.007916 |
| 11Nov2011 | 12653 | 442.76  | 19.06728 | 2 K.REKGGAf chr4@3135    | 1.34E-10 | 0.003851 |
| 11Nov2011 | 16996 | 907.43  | 15.80055 | 2 R.FFFCNFSI Splice@chr  | 9.37E-11 | 0.002814 |
| 11Nov2011 | 35234 | 726.42  | 26.08364 | 1 K.SAGKAHF chr5@1557    | 1.46E-10 | 0.002657 |
| 11Nov2011 | 16974 | 1373.75 | -24.2758 | 1 K.KIFSKEF chr5@1966    | 4.25E-10 | 0.008913 |
| 11Nov2011 | 23333 | 921.5   | -6.20189 | 2 _._KLSRFLFI chrX@6818  | 2.54E-12 | 0        |
| 12Oct2011 | 2909  | 621.31  | -1.08235 | 2 K.TK+14.01 chrX@9336   | 5.28E-10 | 0.00739  |
| 11Nov2011 | 26464 | 1130.1  | -29.4993 | 2 K.MEKALDI chr5@1181    | 8.00E-11 | 0.001751 |
| 11Nov2011 | 27838 | 857.44  | 12.72999 | 2 K.SRYGGI\ chr1@2927    | 7.70E-10 | 0.008813 |
| 11Nov2011 | 6517  | 735.39  | -25.2393 | 2 _._STRKSFAI Splice@chr | 8.78E-10 | 0.009977 |
| 11Nov2011 | 21740 | 1319.19 | 10.46448 | 2 R.SFHKFINF chr2@8479   | 9.46E-11 | 0.002006 |
| 11Nov2011 | 10744 | 623.66  | -16.5736 | 3 K.IEEK+14.( chr5@2029  | 3.20E-10 | 0.00661  |
| 11Nov2011 | 24441 | 1079.07 | 24.61254 | 2 _._RKCSWIV Splice@chr  | 3.51E-10 | 0.005861 |
| 11Nov2011 | 25059 | 1079.07 | 24.61254 | 2 _._RKCSWIV Splice@chr  | 4.61E-10 | 0.009051 |
| 11Nov2011 | 24599 | 1386.7  | -3.41407 | 2 R.SRVREVR chr4@1283    | 1.09E-10 | 0.001716 |
| 11Nov2011 | 18587 | 729.06  | 10.42918 | 3 _._NTQK+14 Splice@chr  | 4.08E-10 | 0.008686 |
| 11Nov2011 | 25207 | 887.44  | -20.9076 | 2 R.RLFFSFSA chrX@1497   | 3.00E-10 | 0.008104 |
| 11Nov2011 | 3389  | 700.33  | -11.1714 | 1 R.ENPGAGI chr5@1379    | 8.12E-11 | 0.002355 |
| 12Oct2011 | 10850 | 945.51  | -29.3841 | 2 Q.IRSISM+ chrX@8909    | 2.52E-10 | 0.005885 |
| 11Nov2011 | 25183 | 889.48  | -13.2302 | 2 R.EKQPK+1 chr1@1357    | 9.96E-12 | 3.56E-04 |
| 11Nov2011 | 32406 | 1122.57 | -20.6412 | 1 R.WLFWDA chrX@8085     | 3.23E-10 | 0.004012 |
| 11Nov2011 | 23408 | 678.91  | -24.1902 | 2 K.NPQFLQ\ chr4@2201    | 1.33E-10 | 0.002836 |
| 11Nov2011 | 24213 | 678.91  | -24.1902 | 2 K.NPQFLQ\ chr4@2201    | 2.58E-10 | 0.00353  |
| 11Nov2011 | 8637  | 735.4   | 28.67369 | 1 _._GGGGGG chr4@1068    | 3.23E-10 | 0.005639 |
| 11Nov2011 | 9177  | 735.4   | 28.67369 | 1 _._GGGGGG chr4@1068    | 3.25E-10 | 0.007011 |
| 11Nov2011 | 28239 | 969.98  | -14.2102 | 2 R.YK+14.01 chr2@4304   | 2.68E-11 | 5.38E-04 |
| 12Oct2011 | 8514  | 833.92  | 18.07583 | 2 R.FFFLGLD\ chr4@1582   | 1.59E-10 | 0.002992 |

|           |       |         |          |                         |          |          |
|-----------|-------|---------|----------|-------------------------|----------|----------|
| 11Nov2011 | 17463 | 1206.25 | -16.3271 | 3 R.TFHAQVI Splice@chr  | 6.96E-12 | 1.28E-04 |
| 11Nov2011 | 23637 | 1134.59 | -13.654  | 2 R.DDLIFTNI Splice@chr | 1.90E-10 | 0.005269 |
| 11Nov2011 | 10730 | 779.43  | 10.97735 | 2 R.K+14.016 chr5@7526  | 3.79E-10 | 0.006385 |
| 11Nov2011 | 10819 | 779.43  | 10.97735 | 2 R.K+14.016 chr5@7526  | 4.83E-10 | 0.009364 |
| 11Nov2011 | 10819 | 779.43  | 10.97735 | 2 R.K+14.016 chr5@7526  | 3.91E-10 | 0.008288 |
| 11Nov2011 | 11561 | 530.33  | -0.34592 | 2 _ITTKNGG Splice@chr   | 1.91E-10 | 0.003467 |
| 12Oct2011 | 8539  | 1027.53 | -21.7612 | 2 K.K+14.016 Splice@chr | 3.61E-10 | 0.008492 |
| 12Oct2011 | 12112 | 1170.64 | 3.757205 | 2 K.KKKRENS chr5@1378   | 4.19E-10 | 0.009284 |
| 11Nov2011 | 25250 | 995.49  | -6.29287 | 2 K.WRVNKG chrX@1118    | 1.41E-10 | 0.003393 |
| 11Nov2011 | 35050 | 1021.49 | 6.707475 | 1 _RHGCFST chr4@4884    | 3.93E-10 | 0.007433 |
| 12Oct2011 | 5754  | 672.35  | -8.09435 | 3 K.WAMPEI chrX@4851    | 4.39E-10 | 0.006292 |
| 11Nov2011 | 1016  | 998.47  | -11.1456 | 1 _NTFAMA chr1@6836     | 6.39E-11 | 0.001498 |
| 11Nov2011 | 19697 | 681.35  | -14.2641 | 2 K.M+15.99 chr1@8495   | 3.15E-10 | 0.006548 |
| 11Nov2011 | 19527 | 681.35  | -14.2641 | 2 K.M+15.99 chr1@8495   | 3.11E-10 | 0.00589  |
| 11Nov2011 | 31071 | 963.53  | 5.29878  | 2 K.VSK+14.0 chr5@1538  | 2.98E-10 | 0.005864 |
| 12Oct2011 | 458   | 461.24  | -7.89072 | 2 K.FVGNQA chr2@1460    | 3.09E-12 | 3.24E-04 |
| 11Nov2011 | 27537 | 1042.87 | 5.646003 | 3 R.STNQWD chr4@1695    | 4.58E-11 | 0.001018 |
| 11Nov2011 | 2477  | 632.33  | 21.173   | 2 _KENEVEK Splice@chr   | 2.15E-10 | 0.004381 |
| 12Oct2011 | 3599  | 673.33  | 3.903667 | 2 R.CDLHKM chr3@1320    | 2.21E-10 | 0.004655 |
| 12Oct2011 | 265   | 569.28  | -23.7359 | 2 K.QFDTEKL chr1@2395   | 2.60E-10 | 0.009562 |
| 12Oct2011 | 271   | 569.28  | -23.7359 | 2 K.QFDTEKL chr1@2395   | 3.93E-11 | 4.74E-04 |
| 11Nov2011 | 25996 | 836.19  | -11.7658 | 4 T.FNAKLSTI Splice@chr | 3.25E-10 | 0.005829 |
| 11Nov2011 | 4603  | 540.8   | 7.349707 | 2 K.PSIWIEA chr2@2464   | 4.16E-10 | 0.006824 |
| 11Nov2011 | 4858  | 540.8   | 7.349707 | 2 K.PSIWIEA chr2@2464   | 4.45E-10 | 0.009057 |
| 11Nov2011 | 4996  | 541.31  | 22.78608 | 2 K.PSIWIEA chr2@2464   | 5.10E-10 | 0.009295 |
| 11Nov2011 | 4997  | 540.8   | 7.349707 | 2 K.PSIWIEA chr2@2464   | 4.54E-10 | 0.008389 |
| 11Nov2011 | 4944  | 540.8   | 7.349707 | 2 K.PSIWIEA chr2@2464   | 3.60E-10 | 0.006792 |
| 11Nov2011 | 5066  | 540.8   | 7.349707 | 2 K.PSIWIEA chr2@2464   | 1.93E-10 | 0.00399  |
| 11Nov2011 | 5116  | 541.3   | 4.242203 | 2 K.PSIWIEA chr2@2464   | 5.55E-10 | 0.009138 |
| 11Nov2011 | 4935  | 541.3   | 4.242203 | 2 K.PSIWIEA chr2@2464   | 3.20E-10 | 0.006407 |
| 11Nov2011 | 4954  | 540.8   | 7.349707 | 2 K.PSIWIEA chr2@2464   | 5.44E-10 | 0.0094   |
| 11Nov2011 | 31864 | 656.03  | -23.1082 | 3 K.YNLSSK+ chr5@6411   | 3.55E-10 | 0.007065 |
| 11Nov2011 | 2895  | 401.74  | -0.91232 | 2 R.KGGGAR chr3@3198    | 3.03E-10 | 0.006531 |
| 11Nov2011 | 20252 | 752.41  | 2.155423 | 2 F.RK+14.01 Splice@chr | 5.40E-10 | 0.009746 |
| 11Nov2011 | 19947 | 752.41  | 2.155423 | 2 F.RK+14.01 Splice@chr | 6.10E-10 | 0.009566 |
| 11Nov2011 | 18193 | 752.41  | 2.155423 | 2 F.RK+14.01 Splice@chr | 4.39E-10 | 0.00965  |
| 11Nov2011 | 16817 | 752.41  | 2.155423 | 2 F.RK+14.01 Splice@chr | 1.54E-10 | 0.003064 |
| 12Oct2011 | 10548 | 614.73  | -16.2944 | 5 R.LKQVTHA chr5@1965   | 2.73E-10 | 0.006386 |
| 12Oct2011 | 10096 | 606.31  | 19.68322 | 5 K.LWQISSI chr4@5735   | 2.10E-10 | 0.005105 |
| 11Nov2011 | 25897 | 811.39  | -26.797  | 3 N.IYCFMNS chr5@1268   | 2.04E-10 | 0.004036 |
| 11Nov2011 | 7279  | 562.29  | -12.5689 | 2 K.SVNSMKI chr5@4245   | 5.73E-10 | 0.009746 |
| 11Nov2011 | 7666  | 562.3   | 5.280571 | 2 K.SVNSMKI chr5@4245   | 2.53E-10 | 0.005426 |
| 11Nov2011 | 7480  | 562.3   | 5.280571 | 2 K.SVNSMKI chr5@4245   | 2.51E-10 | 0.00534  |
| 11Nov2011 | 2232  | 403.73  | 8.576363 | 2 R.LSSNGSIK chr4@1491  | 5.76E-10 | 0.009795 |
| 11Nov2011 | 8821  | 820.39  | -11.3967 | 1 _WWSDV chrX@1360      | 2.45E-10 | 0.004563 |
| 11Nov2011 | 31770 | 830.92  | -10.0019 | 2 R.RREM+1 chr4@1110    | 1.63E-10 | 0.002719 |
| 11Nov2011 | 17219 | 682.34  | 6.911195 | 1 R.GGFGTSF chrX@6695   | 2.10E-10 | 0.006019 |

|           |       |         |          |                         |          |          |
|-----------|-------|---------|----------|-------------------------|----------|----------|
| 11Nov2011 | 17259 | 728.38  | -15.7426 | 2 R.FKVSMNI chrX@1315   | 8.91E-11 | 0.002781 |
| 11Nov2011 | 9740  | 530.33  | 3.270493 | 3 R.LNNSK+1 Splice@chr  | 3.49E-10 | 0.009101 |
| 12Oct2011 | 6936  | 530.34  | 10.79348 | 2 K.ILLSSLSGI chr2@1032 | 2.89E-10 | 0.006533 |
| 11Nov2011 | 26517 | 987.99  | -20.1996 | 2 K.VENGPK+ chr2@3218   | 5.02E-10 | 0.008522 |
| 11Nov2011 | 29819 | 1118.24 | 5.04641  | 3 _EKFHFFLI Splice@chr  | 1.78E-10 | 0.003668 |
| 11Nov2011 | 5883  | 439.22  | -6.54622 | 2 K.IDTAAGS chr3@7728   | 4.43E-10 | 0.006735 |
| 11Nov2011 | 29281 | 927.49  | -14.9149 | 3 R.NM+15.9 Splice@chr  | 4.24E-10 | 0.0072   |
| 12Oct2011 | 9296  | 762.4   | 0.669255 | 3 _FYSM+15 chrX@9985    | 3.95E-10 | 0.008941 |
| 11Nov2011 | 15608 | 582.81  | 14.58229 | 4 R.ISEKWHC chrX@1260   | 3.85E-10 | 0.009894 |
| 11Nov2011 | 15551 | 582.81  | 14.58229 | 4 R.ISEKWHC chrX@1260   | 2.79E-10 | 0.00723  |
| 11Nov2011 | 15198 | 582.81  | 14.58229 | 4 R.ISEKWHC chrX@1260   | 1.14E-10 | 0.00338  |
| 11Nov2011 | 31639 | 877.48  | 17.31631 | 2 K.IFFQLPST chr3@8478  | 3.62E-10 | 0.007532 |
| 11Nov2011 | 967   | 423.26  | -10.1904 | 2 R.KNSGAKL chr2@1063   | 4.72E-10 | 0.009349 |
| 11Nov2011 | 19779 | 1045.08 | -18.9403 | 2 R.M+15.99 chr4@1767   | 2.05E-10 | 0.004297 |
| 11Nov2011 | 10169 | 570.35  | 13.2533  | 2 K.HLKDPLLI chr2@5232  | 7.34E-11 | 0.001875 |
| 11Nov2011 | 33506 | 924.47  | -0.06534 | 3 R.YWRNLK Splice@chr   | 1.82E-10 | 0.003216 |
| 11Nov2011 | 36320 | 896.5   | 28.83176 | 1 R.NHPPLYR chr2@2289   | 4.41E-10 | 0.007206 |
| 12Oct2011 | 2264  | 956.48  | -12.8509 | 1 K.YSNFPSIK chrX@1783  | 1.08E-10 | 0.003372 |
| 12Oct2011 | 1809  | 956.48  | -12.8509 | 1 K.YSNFPSIK chrX@1783  | 3.34E-10 | 0.009377 |
| 12Oct2011 | 2172  | 956.48  | -12.8509 | 1 K.YSNFPSIK chrX@1783  | 2.19E-10 | 0.005442 |
| 11Nov2011 | 28365 | 977.54  | -25.6059 | 2 S.EKFEEK+14 chr1@2662 | 5.13E-10 | 0.009003 |
| 12Oct2011 | 6     | 466.25  | -16.3329 | 2 R.PSGKRGs chr4@1246   | 5.14E-11 | 0.001802 |
| 12Oct2011 | 33    | 466.25  | -16.3329 | 2 R.PSGKRGs chr4@1246   | 1.19E-11 | 6.14E-04 |
| 11Nov2011 | 33667 | 797.4   | -20.7689 | 2 R.VHIMKTF chr1@8379   | 4.17E-10 | 0.007128 |
| 11Nov2011 | 32746 | 1036.52 | 21.53394 | 3 K.M+15.99 chr2@1068   | 2.58E-10 | 0.00487  |
| 11Nov2011 | 306   | 561.31  | 27.66964 | 2 R.LMAAAT chr5@1202    | 3.69E-10 | 0.009685 |
| 11Nov2011 | 8733  | 693.87  | -22.5509 | 2 L.VEKSVFP chr3@2866   | 4.52E-10 | 0.008707 |
| 11Nov2011 | 32441 | 905.72  | -1.39966 | 4 K.HKTTTTR chr5@6343   | 5.86E-10 | 0.00991  |
| 11Nov2011 | 7714  | 757.36  | 5.093514 | 1 R.NPGDPEI chr1@1244   | 9.57E-11 | 0.002206 |
| 12Oct2011 | 0     | 623.3   | -10.943  | 2 _LESQFHN Splice@chr   | 2.30E-10 | 0.005303 |
| 12Oct2011 | 4656  | 690.68  | -5.4279  | 3 S.SIYTDEK+ chr5@1385  | 2.33E-10 | 0.003691 |
| 11Nov2011 | 30546 | 1144.06 | 4.942322 | 2 K.K+14.016 chr2@2091  | 2.42E-10 | 0.005603 |
| 11Nov2011 | 32775 | 1395.81 | 24.0431  | 1 K.NYKIRQK chrX@1391   | 1.81E-11 | 4.73E-04 |
| 12Oct2011 | 4942  | 902.97  | 8.052712 | 2 R.RQVSHTF chr5@6210   | 1.01E-10 | 0.002402 |
| 11Nov2011 | 13653 | 1011.05 | -20.4032 | 2 R.NTLTLLK+ chr1@1342  | 2.80E-10 | 0.007619 |
| 11Nov2011 | 242   | 409.25  | 19.23832 | 2 R.KYGAHLK chr1@6313   | 2.91E-10 | 0.005384 |
| 12Oct2011 | 4502  | 674.86  | -13.0428 | 2 K.ENESKSSI chr2@1080  | 6.36E-11 | 0.001865 |
| 12Oct2011 | 6697  | 1115.1  | 6.276672 | 2 S.LYSSCPE chrX@1173   | 1.58E-10 | 0.004903 |
| 12Oct2011 | 7600  | 1115.1  | 6.276672 | 2 S.LYSSCPE chrX@1173   | 8.21E-11 | 9.07E-04 |
| 11Nov2011 | 3475  | 522.29  | 11.00626 | 2 R.IMRIHAN chr2@9290   | 3.43E-10 | 0.006576 |
| 12Oct2011 | 10738 | 1085.26 | 19.16512 | 3 R.QFFFPEN chr4@1676   | 1.06E-10 | 0.002001 |
| 11Nov2011 | 22468 | 570.37  | 14.90091 | 2 R.KNINVTLI chr1@4939  | 4.22E-10 | 0.006416 |
| 11Nov2011 | 24636 | 1198.23 | 18.14944 | 2 K.IRKKFSRC chr4@1333  | 1.28E-10 | 0.003406 |
| 12Oct2011 | 2200  | 460.25  | 8.040761 | 2 _ATDGSSII chr5@1148   | 3.04E-11 | 0.001401 |
| 12Oct2011 | 6043  | 650.84  | -27.8948 | 2 R.K+14.016 chr3@1278  | 3.02E-10 | 0.00805  |
| 11Nov2011 | 5218  | 861.45  | 28.05518 | 1 K.NTNGDA Splice@chr   | 1.48E-11 | 3.10E-04 |
| 11Nov2011 | 12659 | 893.49  | -1.64131 | 2 I.VEEHPVLI Splice@chr | 3.59E-10 | 0.00641  |

|           |       |         |          |                         |          |          |
|-----------|-------|---------|----------|-------------------------|----------|----------|
| 11Nov2011 | 4785  | 805.42  | -6.07491 | 1 K.KQASGGI chrX@4434   | 1.81E-10 | 0.004056 |
| 11Nov2011 | 22896 | 913     | 5.793417 | 2 R.RFWK+14 chr2@1448   | 5.13E-10 | 0.009295 |
| 12Oct2011 | 6656  | 554.28  | -15.7536 | 4 R.DTEMKH chr5@1895    | 2.80E-10 | 0.007645 |
| 11Nov2011 | 15634 | 757.86  | 20.88709 | 2 Q.MNAQC\ Splice@chr   | 4.35E-10 | 0.00804  |
| 11Nov2011 | 29472 | 729.44  | 19.27202 | 1 K.AQKPTG\ chrX@2304   | 3.77E-10 | 0.006997 |
| 11Nov2011 | 34630 | 1114.59 | 4.60404  | 2 K.KMK+14. chr2@1226   | 3.68E-10 | 0.006026 |
| 11Nov2011 | 32083 | 758.43  | 3.545653 | 1 R.TTGRPAR chr4@1644   | 2.14E-10 | 0.003737 |
| 12Oct2011 | 8631  | 1121.59 | 27.45231 | 1 R.NNK+14.1 Splice@chr | 3.07E-10 | 0.006024 |
| 11Nov2011 | 7371  | 514.31  | -11.9698 | 3 K.PKILFSRP chr4@2154  | 2.33E-10 | 0.004494 |
| 11Nov2011 | 32370 | 1250.11 | 12.99779 | 2 R.SSSKHEYI Splice@chr | 2.73E-10 | 0.005623 |
| 11Nov2011 | 27258 | 911.98  | -28.7233 | 2 K.NVILFSN\ chrX@1348  | 3.78E-10 | 0.006997 |
| 12Oct2011 | 4924  | 473.25  | 5.048233 | 2 _YSSVVAY\ chr5@1205   | 2.40E-10 | 0.004638 |
| 11Nov2011 | 9229  | 553.32  | 11.11826 | 2 R.QAKFAA\ chrX@2551   | 1.20E-10 | 0.002717 |
| 12Oct2011 | 10452 | 1352.24 | 3.819092 | 2 _ILLM+15. Splice@chr  | 2.27E-10 | 0.003457 |
| 11Nov2011 | 24264 | 855.44  | 12.90276 | 2 T.DTNCILFI chr3@6438  | 3.44E-11 | 9.45E-04 |
| 11Nov2011 | 27216 | 1221.1  | -27.413  | 2 K.LFRHMF5 chr5@4676   | 1.43E-10 | 0.00264  |
| 12Oct2011 | 5629  | 479.27  | -26.2887 | 3 _AILSPLGC Splice@chr  | 4.85E-10 | 0.006719 |
| 11Nov2011 | 26684 | 927.5   | -17.9184 | 2 K.LKFYFGL\ chr2@4056  | 2.05E-10 | 0.004566 |
| 12Oct2011 | 2510  | 474.93  | 15.19713 | 3 _MVSQTP\ chr4@1039    | 6.72E-11 | 0.001979 |
| 11Nov2011 | 34296 | 779.39  | -8.15487 | 2 R.NQRPLA\ Splice@chr  | 6.36E-10 | 0.007036 |
| 12Oct2011 | 2096  | 514.8   | -0.47517 | 2 R.SLLPVCAI Splice@chr | 3.99E-10 | 0.008488 |
| 12Oct2011 | 9151  | 857.96  | -1.56692 | 2 R.RM+15.9 chr1@1195   | 2.48E-10 | 0.006009 |
| 11Nov2011 | 22561 | 1063.55 | 16.2739  | 1 R.M+15.99 chr5@1515   | 4.16E-10 | 0.007128 |
| 11Nov2011 | 32612 | 1212.61 | -23.7659 | 3 K.KM+15.9 chr4@5399   | 2.38E-10 | 0.00446  |
| 12Oct2011 | 7080  | 747.39  | -10.6851 | 3 R.QCLLM+1 Splice@chr  | 1.29E-10 | 0.002524 |
| 11Nov2011 | 23828 | 1031.5  | -15.9916 | 2 R.WRRNEA chr1@6435    | 2.31E-10 | 0.006276 |
| 11Nov2011 | 4627  | 773.42  | -5.06098 | 1 R.NDSLPAK chrX@1201   | 5.08E-10 | 0.009962 |
| 11Nov2011 | 4176  | 773.41  | -18.0369 | 1 R.NDSLPAK chrX@1201   | 5.08E-10 | 0.009945 |
| 11Nov2011 | 19236 | 981.5   | -16.3859 | 1 R.FVEDML\ chr1@8550   | 3.34E-10 | 0.006025 |
| 11Nov2011 | 35217 | 954.54  | -17.3623 | 1 R.VRLESPPI Splice@chr | 5.15E-10 | 0.008743 |
| 11Nov2011 | 29411 | 667.84  | -8.40016 | 4 R.DEVAMV chr4@8056    | 9.12E-11 | 0.001341 |
| 11Nov2011 | 31766 | 667.59  | -7.14197 | 4 R.DEVAMV chr4@8056    | 4.72E-10 | 0.009375 |
| 12Oct2011 | 4274  | 698.68  | -21.7925 | 3 K.YSTSTSSS Splice@chr | 5.01E-11 | 0.001256 |
| 11Nov2011 | 4544  | 452.77  | 19.65811 | 2 R.ETGFLPIK chr2@7826  | 5.31E-10 | 0.008956 |
| 11Nov2011 | 30703 | 770.73  | -4.65195 | 3 R.WNSRQF Splice@chr   | 2.42E-10 | 0.004913 |
| 11Nov2011 | 6460  | 515.36  | 24.88712 | 2 K.LK+14.01 chr5@8595  | 1.05E-10 | 0.001716 |
| 11Nov2011 | 3082  | 523.25  | 0.8181   | 2 K.NEDQAN chrX@1257    | 1.44E-10 | 0.004168 |
| 11Nov2011 | 35117 | 988.58  | -16.0209 | 1 R.RRSSGRIF chr5@4435  | 3.03E-10 | 0.005877 |
| 12Oct2011 | 11971 | 1018.56 | -9.97954 | 3 R.SYVYYYTI chr5@1717  | 8.94E-11 | 0.001732 |
| 11Nov2011 | 11222 | 494.22  | -11.0137 | 2 R.DSQKGCI chr4@1136   | 5.67E-10 | 0.009211 |
| 11Nov2011 | 10690 | 514.31  | 24.70002 | 2 _IGGIGTVF Splice@chr  | 3.05E-10 | 0.00574  |
| 11Nov2011 | 9295  | 514.31  | 24.70002 | 2 _IGGIGTVF Splice@chr  | 4.54E-10 | 0.008647 |
| 11Nov2011 | 14277 | 1121.92 | 20.20852 | 3 R.NGK+14.1 Splice@chr | 3.33E-10 | 0.008715 |
| 12Oct2011 | 9993  | 989.03  | 5.127358 | 2 _FYPQKCL\ chr3@1248   | 1.23E-10 | 0.002642 |
| 11Nov2011 | 34446 | 760.4   | -4.0463  | 3 _TQTNTKI\ chrX@7978   | 3.85E-10 | 0.006509 |
| 11Nov2011 | 31739 | 760.4   | -4.0463  | 3 _TQTNTKI\ chrX@7978   | 3.21E-10 | 0.007085 |
| 12Oct2011 | 319   | 585.31  | 28.80563 | 2 _HSEQPW Splice@chr    | 1.56E-10 | 0.002743 |

|           |       |         |          |                         |          |          |
|-----------|-------|---------|----------|-------------------------|----------|----------|
| 12Oct2011 | 10954 | 1138.91 | 10.37018 | 3 K.RLCSIFRN chr4@1235  | 2.96E-10 | 0.006249 |
| 11Nov2011 | 7907  | 548.28  | 8.029946 | 2 K.NFAVSSL chr2@4567   | 9.93E-11 | 0.002043 |
| 12Oct2011 | 3305  | 1060.5  | -17.4694 | 1 R.NFFYNEL Splice@chr  | 1.92E-10 | 0.004665 |
| 12Oct2011 | 3528  | 821.45  | 14.73003 | 2 G.KVKIHIAI chrX@1364  | 1.97E-10 | 0.006726 |
| 12Oct2011 | 3720  | 821.45  | 14.73003 | 2 G.KVKIHIAI chrX@1364  | 1.86E-10 | 0.004072 |
| 12Oct2011 | 531   | 461.24  | 22.97084 | 2 K.WTEESIR chr5@1187   | 3.46E-10 | 0.007447 |
| 11Nov2011 | 21679 | 572     | -2.45872 | 3 K.NEFLHGII chr4@4359  | 4.02E-10 | 0.006913 |
| 12Oct2011 | 653   | 587.34  | 25.68426 | 2 K.EVQEKGF chr4@1030   | 1.05E-10 | 0.001815 |
| 11Nov2011 | 24403 | 1161.63 | -20.0698 | 2 K.SRYVSRIV chr5@1002  | 2.48E-11 | 5.79E-04 |
| 12Oct2011 | 3760  | 437.23  | 15.48445 | 3 R.VMLMISC chr2@5842   | 3.66E-10 | 0.007758 |
| 11Nov2011 | 21384 | 824.46  | -13.4597 | 2 R.KFAPVSF chr1@1218   | 7.88E-11 | 0.002025 |
| 11Nov2011 | 27368 | 1023.56 | 3.614022 | 2 K.NGK+14.1 chr1@1295  | 3.92E-10 | 0.006823 |
| 12Oct2011 | 11268 | 747.72  | -18.745  | 3 S.CRLFMLY chrX@6435   | 5.80E-11 | 0.001274 |
| 11Nov2011 | 22725 | 800.43  | -10.5031 | 2 K.LLNWNIC chrX@2028   | 5.43E-10 | 0.009746 |
| 11Nov2011 | 28065 | 1219.58 | -24.326  | 2 _PEYK+14. chr4@1148   | 5.85E-10 | 0.00991  |
| 11Nov2011 | 33854 | 863.11  | 8.712445 | 3 R.FLDILRFS chrX@8075  | 7.08E-10 | 0.008117 |
| 11Nov2011 | 4275  | 758.42  | 0.322335 | 2 R.KDK+14.1 chr1@9736  | 1.16E-10 | 0.002963 |
| 11Nov2011 | 3956  | 947.5   | -10.8427 | 1 K.NNSKNLT chr4@4595   | 2.52E-10 | 0.004235 |
| 11Nov2011 | 6749  | 495.33  | 10.37179 | 3 K.IKRNLHVI chr2@5946  | 3.62E-10 | 0.009282 |
| 11Nov2011 | 12943 | 569.29  | -20.7985 | 2 K.ANYVRSC chr2@1268   | 4.01E-10 | 0.008627 |
| 12Oct2011 | 7180  | 791.39  | -12.2782 | 2 K.KKCDLCS chrX@1147   | 9.34E-11 | 0.002001 |
| 11Nov2011 | 25661 | 828.76  | 24.97256 | 3 I.FFK+14.0 chr5@2070  | 5.29E-10 | 0.009449 |
| 11Nov2011 | 6080  | 520.28  | 22.65088 | 2 _LTCLSSTT chr3@5554   | 3.10E-11 | 7.55E-04 |
| 11Nov2011 | 8465  | 717.89  | -17.2831 | 2 K.LRGWNK chr3@8881    | 1.36E-10 | 0.0036   |
| 11Nov2011 | 8522  | 717.89  | -17.2831 | 2 K.LRGWNK chr3@8881    | 3.15E-10 | 0.008386 |
| 11Nov2011 | 7     | 513.28  | -26.9506 | 2 R.HGKKRNI chrX@1629   | 2.11E-10 | 0.004311 |
| 11Nov2011 | 24498 | 1114.09 | -28.2781 | 2 _RQELSVK Splice@chr   | 3.82E-10 | 0.008528 |
| 11Nov2011 | 5698  | 445.91  | -24.2068 | 3 R.KNENFSL chr1@8964   | 4.42E-10 | 0.008088 |
| 12Oct2011 | 5008  | 609.36  | 9.289912 | 2 L.KMLDLQI Splice@chr  | 3.66E-10 | 0.008824 |
| 12Oct2011 | 5230  | 609.36  | 9.289912 | 2 L.KMLDLQI Splice@chr  | 4.13E-10 | 0.008125 |
| 12Oct2011 | 457   | 502.3   | -13.0886 | 2 K.KKNNFPK chr5@1338   | 2.18E-10 | 0.004731 |
| 11Nov2011 | 30002 | 958.52  | -23.1175 | 2 _FQAILLNI chr5@1157   | 4.35E-10 | 0.007258 |
| 11Nov2011 | 29658 | 859.96  | -19.5862 | 2 K.NLNPRAP Splice@chr  | 3.44E-10 | 0.006706 |
| 11Nov2011 | 8128  | 621.3   | 22.67205 | 1 R.GGCAGA chr2@5469    | 2.89E-11 | 4.83E-04 |
| 12Oct2011 | 11144 | 663.94  | -27.0306 | 5 R.RGSREVS chrX@5381   | 3.68E-10 | 0.007916 |
| 11Nov2011 | 2875  | 437.56  | 0.141559 | 3 K.VM+15.9 chrX@3353   | 4.17E-10 | 0.006687 |
| 12Oct2011 | 7315  | 849.92  | 28.90386 | 2 _PQLSQM chr3@7482     | 1.19E-10 | 0.002201 |
| 12Oct2011 | 7942  | 770.39  | -10.8511 | 4 R.RSSSLFFL Splice@chr | 3.29E-10 | 0.006933 |
| 11Nov2011 | 19943 | 995.56  | -7.9166  | 2 K.KQPLLTFC chr5@5993  | 2.81E-10 | 0.006883 |
| 11Nov2011 | 26017 | 1105.03 | -7.49341 | 2 K.ICSSFNKN chr4@8141  | 1.16E-10 | 0.003492 |
| 11Nov2011 | 31466 | 736.38  | -9.2128  | 2 R.IGESTWE Splice@chr  | 1.76E-10 | 0.003024 |
| 12Oct2011 | 924   | 962.78  | -10.4075 | 3 P.LSSQSNE chr3@1186   | 2.23E-10 | 0.005313 |
| 11Nov2011 | 15357 | 1011.47 | -5.49666 | 1 R.MPYLSM chrX@6717    | 3.29E-10 | 0.005421 |
| 11Nov2011 | 1874  | 426.21  | -11.1963 | 3 R.VEEESPFC chr1@1341  | 3.24E-10 | 0.008565 |
| 11Nov2011 | 22260 | 878.78  | -20.5817 | 3 Y.AEKYMKI chr4@7115   | 1.41E-10 | 0.003772 |
| 11Nov2011 | 23896 | 879.11  | -25.6568 | 3 Y.AEKYMKI chr4@7115   | 4.48E-11 | 0.001312 |
| 11Nov2011 | 29587 | 879.11  | -25.6568 | 3 Y.AEKYMKI chr4@7115   | 4.21E-10 | 0.008308 |

|           |       |         |          |                          |          |          |
|-----------|-------|---------|----------|--------------------------|----------|----------|
| 11Nov2011 | 33912 | 1108.09 | -14.775  | 2 K.NECGEK+ Splice@chr   | 6.06E-10 | 0.009512 |
| 11Nov2011 | 28765 | 910.51  | -22.3017 | 1 R.VRLGDPP chr2@6150    | 2.19E-10 | 0.005453 |
| 12Oct2011 | 110   | 479.25  | 9.125196 | 2 K.FPGFFSQ chr5@1979    | 4.20E-10 | 0.009284 |
| 11Nov2011 | 26653 | 693.34  | -5.02921 | 1 _._AGMQAS chr2@4249    | 4.43E-10 | 0.009606 |
| 11Nov2011 | 3419  | 846.43  | -2.45462 | 1 R.DGTIGDII chrX@4603   | 2.85E-10 | 0.007813 |
| 11Nov2011 | 22190 | 1000.99 | -9.9222  | 2 R.FYYFSATf chr1@7882   | 3.59E-10 | 0.006421 |
| 11Nov2011 | 4164  | 852.44  | 21.64942 | 1 R.TGSFGEV chr5@1731    | 1.13E-10 | 0.002705 |
| 11Nov2011 | 32126 | 1216.66 | -6.94668 | 3 R.LRKVHHN Splice@chr   | 1.37E-11 | 2.11E-04 |
| 12Oct2011 | 286   | 602.36  | 24.09903 | 1 R.IGGAGAF chr4@1462    | 2.14E-10 | 0.00389  |
| 11Nov2011 | 1976  | 769.35  | -22.7455 | 1 R.SAGSSFG Splice@chr   | 1.88E-10 | 0.005113 |
| 11Nov2011 | 18510 | 884.51  | 5.49648  | 2 _._VYALLNT chr4@2093   | 6.79E-11 | 0.001978 |
| 11Nov2011 | 31905 | 1193.13 | 2.485091 | 2 R.NK+14.0: Splice@chr  | 5.34E-10 | 0.00913  |
| 11Nov2011 | 2654  | 656.42  | -3.16623 | 2 K.DLKAVLK chrX@1553    | 5.02E-10 | 0.00969  |
| 11Nov2011 | 17558 | 472.28  | 6.151833 | 2 R.NIVEIVEK chr1@8257   | 8.99E-11 | 0.001951 |
| 11Nov2011 | 4060  | 411.55  | -26.8589 | 3 K.ALQM+1: chr3@1125    | 1.70E-10 | 0.004152 |
| 11Nov2011 | 4092  | 411.55  | -26.8589 | 3 K.ALQM+1: chr3@1125    | 3.42E-10 | 0.008343 |
| 11Nov2011 | 4385  | 411.55  | -26.8589 | 3 K.ALQM+1: chr3@1125    | 2.52E-10 | 0.005711 |
| 11Nov2011 | 29993 | 995.55  | 23.85597 | 2 T.KMK+14.1 chrX@9610   | 3.77E-10 | 0.00641  |
| 11Nov2011 | 29858 | 963.13  | 26.98305 | 3 _._CSIRPNSC Splice@chr | 7.07E-11 | 0.00239  |
| 11Nov2011 | 30220 | 963.13  | 26.98305 | 3 _._CSIRPNSC Splice@chr | 3.64E-11 | 0.001301 |
| 11Nov2011 | 32865 | 1072.89 | -17.1582 | 3 _._WKLEIVG Splice@chr  | 4.65E-10 | 0.009213 |
| 11Nov2011 | 7946  | 845.43  | 3.830875 | 2 Y.FKQCYCE chr5@1038    | 3.58E-10 | 0.009006 |
| 11Nov2011 | 19494 | 1049.53 | 2.592644 | 2 K.DEMMTv Splice@chr    | 1.91E-10 | 0.004961 |
| 11Nov2011 | 24261 | 1236.64 | -3.34277 | 3 K.MAK+14. chr4@2357    | 1.44E-10 | 0.003585 |
| 11Nov2011 | 5105  | 519.29  | 3.479498 | 2 R.YLRGRDT chrX@9304    | 1.40E-10 | 0.003527 |
| 12Oct2011 | 5814  | 574.28  | -2.23588 | 3 _._ATQAHPI Splice@chr  | 3.71E-10 | 0.004972 |
| 11Nov2011 | 6346  | 735.39  | -3.20048 | 2 K.SKMDK+: Splice@chr   | 1.35E-10 | 0.002801 |
| 12Oct2011 | 5157  | 1225.56 | 9.200733 | 2 K.YEGAEEKS Splice@chr  | 3.75E-11 | 9.01E-04 |
| 12Oct2011 | 12884 | 1136.53 | -27.1971 | 2 _._CTQNLSG chrX@1073   | 3.70E-10 | 0.006666 |
| 12Oct2011 | 2248  | 434.24  | 1.646563 | 3 R.FAVDDFL chr5@2956    | 2.26E-10 | 0.005124 |
| 11Nov2011 | 20964 | 757.42  | -3.87312 | 2 F.QVFENV\ chr3@8444    | 7.34E-12 | 1.61E-04 |
| 12Oct2011 | 9537  | 757.43  | 9.360043 | 2 F.QVFENV\ chr3@8444    | 2.43E-11 | 2.34E-04 |
| 12Oct2011 | 9563  | 757.43  | 9.360043 | 2 F.QVFENV\ chr3@8444    | 1.35E-11 | 2.34E-04 |
| 12Oct2011 | 9756  | 757.43  | 9.360043 | 2 F.QVFENV\ chr3@8444    | 1.37E-12 | 0        |
| 12Oct2011 | 9722  | 757.43  | 9.360043 | 2 F.QVFENV\ chr3@8444    | 2.69E-12 | 0        |
| 12Oct2011 | 8409  | 757.43  | 9.360043 | 2 F.QVFENV\ chr3@8444    | 2.24E-11 | 9.21E-04 |
| 12Oct2011 | 8382  | 757.93  | 7.142486 | 2 F.QVFENV\ chr3@8444    | 2.02E-10 | 0.006726 |
| 12Oct2011 | 8384  | 757.43  | 9.360043 | 2 F.QVFENV\ chr3@8444    | 7.11E-12 | 6.82E-04 |
| 12Oct2011 | 8684  | 757.43  | 9.360043 | 2 F.QVFENV\ chr3@8444    | 2.79E-11 | 0.001843 |
| 12Oct2011 | 10744 | 757.93  | 7.142486 | 2 F.QVFENV\ chr3@8444    | 1.84E-10 | 0.003903 |
| 12Oct2011 | 10676 | 757.93  | 7.142486 | 2 F.QVFENV\ chr3@8444    | 2.36E-11 | 9.95E-04 |
| 12Oct2011 | 10703 | 757.43  | 9.360043 | 2 F.QVFENV\ chr3@8444    | 9.82E-11 | 0.002402 |
| 12Oct2011 | 10808 | 757.43  | 9.360043 | 2 F.QVFENV\ chr3@8444    | 2.96E-11 | 8.00E-04 |
| 12Oct2011 | 8477  | 757.43  | 9.360043 | 2 F.QVFENV\ chr3@8444    | 1.70E-11 | 3.21E-04 |
| 12Oct2011 | 8507  | 757.43  | 9.360043 | 2 F.QVFENV\ chr3@8444    | 3.59E-10 | 0.007256 |
| 12Oct2011 | 8420  | 757.43  | 9.360043 | 2 F.QVFENV\ chr3@8444    | 2.96E-11 | 9.01E-04 |
| 12Oct2011 | 9494  | 757.43  | 9.360043 | 2 F.QVFENV\ chr3@8444    | 6.16E-11 | 6.83E-04 |

|           |       |         |          |                         |          |          |
|-----------|-------|---------|----------|-------------------------|----------|----------|
| 12Oct2011 | 9523  | 757.43  | 9.360043 | 2 F.QVFENV\ chr3@844    | 7.09E-11 | 6.83E-04 |
| 12Oct2011 | 9672  | 757.43  | 9.360043 | 2 F.QVFENV\ chr3@844    | 4.76E-12 | 0        |
| 12Oct2011 | 8695  | 757.43  | 9.360043 | 2 F.QVFENV\ chr3@844    | 3.50E-11 | 5.96E-04 |
| 11Nov2011 | 26942 | 1187.74 | -9.87471 | 1 K.FQNLLAK Splice@chr  | 5.33E-10 | 0.008493 |
| 12Oct2011 | 9852  | 944.6   | 29.48117 | 2 K.QLK+14.C chr2@137   | 1.34E-10 | 0.004477 |
| 11Nov2011 | 1872  | 536.81  | -3.07566 | 2 R.FKLLHGT chr3@867    | 1.75E-10 | 0.004758 |
| 11Nov2011 | 15082 | 1122.58 | 1.470399 | 3 K.FSSIVYLF chr5@107   | 4.42E-10 | 0.009606 |
| 11Nov2011 | 8091  | 474.5   | -10.8002 | 4 _LQKASRR Splice@chr   | 3.24E-10 | 0.00689  |
| 11Nov2011 | 28644 | 806.09  | -13.0188 | 3 P.IFDLIENL' chrX@857  | 3.73E-10 | 0.007113 |
| 12Oct2011 | 9252  | 859.44  | 1.042812 | 3 K.YMPRGYI chr2@691    | 1.83E-10 | 0.006231 |
| 12Oct2011 | 4950  | 977.48  | 10.31356 | 2 R.RTDEMC' Splice@chr  | 2.38E-10 | 0.003923 |
| 11Nov2011 | 17688 | 610.32  | -18.3643 | 3 R.NLLM+15 Splice@chr  | 4.49E-10 | 0.008473 |
| 11Nov2011 | 6201  | 571.36  | -11.2978 | 2 R.TKK+14.C chrX@124   | 3.30E-10 | 0.009976 |
| 11Nov2011 | 21906 | 730.89  | 0.919857 | 2 R.ETTINSGL chrX@875   | 4.96E-10 | 0.00984  |
| 11Nov2011 | 1780  | 463.22  | 24.52483 | 2 _VEFGDSD chr1@106     | 2.99E-10 | 0.00789  |
| 11Nov2011 | 31808 | 947.5   | -3.22542 | 1 R.EETIWR. chr4@979    | 3.01E-10 | 0.005377 |
| 11Nov2011 | 22677 | 1093.03 | -27.1627 | 2 E.QLFLQYP. chr4@104   | 4.12E-11 | 0.001058 |
| 12Oct2011 | 9920  | 1053    | 6.41518  | 2 K.GFKFLNF' chr2@583   | 3.88E-11 | 0.00263  |
| 11Nov2011 | 2309  | 452.72  | 23.87807 | 2 _WGEGGC chr1@116      | 3.66E-10 | 0.006972 |
| 11Nov2011 | 4522  | 474.27  | 23.04782 | 2 _VEARSTG chr5@116     | 4.32E-10 | 0.007255 |
| 11Nov2011 | 20877 | 555.63  | -25.3104 | 3 R.YFK+14.0 chr1@162   | 4.85E-10 | 0.007306 |
| 11Nov2011 | 13070 | 521.94  | 17.73132 | 3 _SATFQDI' chrX@210    | 2.64E-10 | 0.004623 |
| 11Nov2011 | 13129 | 521.94  | 17.73132 | 3 _SATFQDI' chrX@210    | 5.07E-10 | 0.009962 |
| 12Oct2011 | 4342  | 914.55  | -8.28456 | 1 K.HYKLVVR chr3@586    | 3.84E-10 | 0.008252 |
| 11Nov2011 | 10093 | 403.73  | 24.22816 | 4 R.K+14.016 Splice@chr | 2.80E-10 | 0.005541 |
| 12Oct2011 | 6981  | 542.97  | 16.29246 | 3 R.VYAFKDN chr3@134    | 1.21E-10 | 0.002726 |
| 11Nov2011 | 27802 | 696.38  | -22.1037 | 4 _TLQKAQL chr1@702     | 3.01E-10 | 0.003959 |
| 12Oct2011 | 5133  | 864.93  | 10.88005 | 2 R.WWWHL chr2@396      | 2.38E-10 | 0.006699 |
| 11Nov2011 | 11669 | 818.91  | -25.2738 | 2 F.RAPHELQ chr1@288    | 5.50E-10 | 0.008882 |
| 11Nov2011 | 15402 | 881.47  | -10.5368 | 2 K.KM+15.9 chr2@603    | 1.76E-10 | 0.003024 |
| 11Nov2011 | 32249 | 1293.12 | -7.36888 | 2 R.ICKGRYRI Splice@chr | 3.59E-10 | 0.006007 |
| 11Nov2011 | 25112 | 804.4   | 1.747355 | 2 K.LYRNSMI chr2@123    | 2.10E-11 | 8.45E-04 |
| 12Oct2011 | 8268  | 793.93  | -27.3798 | 2 K.LKK+14.0 chr3@474   | 2.69E-10 | 0.005881 |
| 12Oct2011 | 5138  | 1225.56 | 9.200733 | 2 K.YEGAELS Splice@chr  | 1.12E-11 | 5.96E-04 |
| 12Oct2011 | 8872  | 1143.59 | 23.29106 | 2 K.NSRFLSK- chr1@806   | 2.01E-10 | 0.005097 |
| 12Oct2011 | 6589  | 711.85  | -2.70508 | 2 R.SLHTLFST Splice@chr | 1.63E-10 | 0.004323 |
| 12Oct2011 | 516   | 461.23  | 1.26361  | 2 K.WTEESIR chr5@118    | 4.01E-10 | 0.008972 |
| 12Oct2011 | 3462  | 868.43  | 10.92162 | 1 K.SSSGSLSS chr2@113   | 1.71E-10 | 0.004323 |
| 12Oct2011 | 390   | 532.26  | 18.68952 | 2 W.SSAMLE chr3@120     | 2.39E-10 | 0.00556  |
| 12Oct2011 | 8720  | 757.93  | 7.142486 | 2 F.QVFENV\ chr3@844    | 1.58E-10 | 0.003815 |
| 12Oct2011 | 6535  | 711.85  | -2.70508 | 2 R.SLHTLFST Splice@chr | 1.06E-10 | 0.002233 |
| 12Oct2011 | 3931  | 678.83  | -9.90496 | 2 K.M+15.99 chr1@145    | 2.05E-10 | 0.00614  |
| 12Oct2011 | 6785  | 861.97  | -26.066  | 2 R.KTNLINIC chr4@445   | 1.97E-10 | 0.005884 |
| 12Oct2011 | 4004  | 739.4   | 18.15789 | 2 K.M+15.99 chr5@547    | 1.96E-10 | 0.005884 |
| 12Oct2011 | 8997  | 757.43  | 9.360043 | 2 F.QVFENV\ chr3@844    | 1.96E-11 | 6.71E-04 |
| 12Oct2011 | 6894  | 711.85  | -2.70508 | 2 R.SLHTLFST Splice@chr | 9.07E-11 | 0.00268  |
| 12Oct2011 | 5757  | 897.42  | -27.6753 | 3 _QVREMH Splice@chr    | 1.56E-10 | 0.005393 |

|           |      |         |          |                         |          |          |
|-----------|------|---------|----------|-------------------------|----------|----------|
| 12Oct2011 | 5769 | 1345.13 | -23.5213 | 2 _QVREMH Splice@chr    | 7.29E-11 | 0.002104 |
| 12Oct2011 | 1182 | 440.24  | 14.88826 | 2 R.SIAMFGP chr2@4157   | 3.49E-10 | 0.009901 |
| 12Oct2011 | 1980 | 433.76  | 2.609238 | 2 _IVDLP GPI chr3@1104  | 8.99E-11 | 0.00268  |
| 12Oct2011 | 63   | 816.46  | 2.544847 | 1 K.NDVAAA Splice@chr   | 8.54E-11 | 0.00268  |
| 12Oct2011 | 6806 | 711.85  | -2.70508 | 2 R.SLHTLFST Splice@chr | 8.21E-11 | 0.00268  |
| 12Oct2011 | 5433 | 1225.56 | 9.200733 | 2 K.YEGA EKS Splice@chr | 5.33E-12 | 3.53E-04 |
| 12Oct2011 | 524  | 461.23  | 1.26361  | 2 K.WTEESIR chr5@1187   | 1.92E-10 | 0.005884 |
| 12Oct2011 | 729  | 632.78  | -25.4076 | 2 _KM+15.9 Splice@chr   | 3.16E-10 | 0.008623 |
| 12Oct2011 | 6935 | 711.85  | -2.70508 | 2 R.SLHTLFST Splice@chr | 2.00E-10 | 0.00614  |
| 12Oct2011 | 5764 | 1346.13 | -3.69865 | 2 _QVREMH Splice@chr    | 3.52E-11 | 9.56E-04 |
| 12Oct2011 | 4316 | 840.91  | -20.3215 | 2 F.FM+15.9 Splice@chr  | 2.44E-10 | 0.006864 |
| 12Oct2011 | 4786 | 1079.58 | 25.35245 | 1 R.FISHFTAE chr4@6987  | 3.16E-10 | 0.008623 |
| 12Oct2011 | 457  | 531.26  | -14.388  | 2 K.RMRGAD chr4@7697    | 1.74E-10 | 0.005639 |
| 12Oct2011 | 70   | 722.35  | 3.723    | 1 R.FQGGGEI chr1@2595   | 3.33E-10 | 0.009398 |
| 12Oct2011 | 1247 | 752.36  | -29.0808 | 2 R.LSEILNMI chr4@1051  | 3.03E-10 | 0.007563 |
| 12Oct2011 | 6850 | 711.85  | -2.70508 | 2 R.SLHTLFST Splice@chr | 2.12E-10 | 0.006376 |
| 12Oct2011 | 88   | 722.35  | 3.723    | 1 R.FQGGGEI chr1@2595   | 3.33E-10 | 0.009148 |
| 12Oct2011 | 6767 | 1288.7  | -18.58   | 2 K.TKKQKKK chrX@6244   | 1.56E-10 | 0.003568 |
| 12Oct2011 | 4029 | 473.25  | 5.048233 | 2 _YSSVVAY chr5@1203    | 4.95E-11 | 0.00147  |
| 12Oct2011 | 6962 | 1115.1  | 6.276672 | 2 S.LYSSCPL chrX@1173   | 3.97E-10 | 0.009563 |
| 12Oct2011 | 5513 | 897.42  | -27.6753 | 3 _QVREMH Splice@chr    | 1.46E-10 | 0.003312 |
| 12Oct2011 | 1162 | 440.24  | 14.88826 | 2 R.SIAMFGP chr2@4157   | 1.26E-10 | 0.002801 |
| 12Oct2011 | 8638 | 757.43  | 9.360043 | 2 F.QVFENV\ chr3@8444   | 5.95E-11 | 0.00147  |
| 12Oct2011 | 6525 | 711.85  | -2.70508 | 2 R.SLHTLFST Splice@chr | 1.53E-10 | 0.003568 |
| 12Oct2011 | 4105 | 840.92  | -8.39688 | 2 F.FM+15.9 Splice@chr  | 2.08E-10 | 0.005676 |
| 12Oct2011 | 1912 | 480.76  | 17.23891 | 2 R.WRAWW chr2@9736     | 2.39E-10 | 0.006665 |
| 12Oct2011 | 1465 | 500.94  | -13.5108 | 3 K.IAEK+14.1 chr3@2136 | 1.11E-10 | 0.002542 |
| 12Oct2011 | 6090 | 749.07  | -5.19597 | 3 R.LPSKENL\ chr4@5639  | 3.09E-10 | 0.007909 |
| 12Oct2011 | 3972 | 566.31  | 21.45326 | 2 R.EVAQLEC chr5@1706   | 4.09E-11 | 0.00121  |
| 12Oct2011 | 8608 | 757.43  | 9.360043 | 2 F.QVFENV\ chr3@8444   | 5.02E-11 | 0.00147  |
| 12Oct2011 | 794  | 632.78  | -25.4076 | 2 _KM+15.9 Splice@chr   | 1.03E-10 | 0.002542 |
| 12Oct2011 | 6572 | 711.85  | -2.70508 | 2 R.SLHTLFST Splice@chr | 1.32E-10 | 0.002801 |
| 12Oct2011 | 6926 | 1115.1  | 6.276672 | 2 S.LYSSCPL chrX@1173   | 6.04E-11 | 0.00147  |
| 12Oct2011 | 9185 | 757.43  | 9.360043 | 2 F.QVFENV\ chr3@8444   | 4.25E-11 | 0.001203 |
| 12Oct2011 | 3167 | 693.87  | -6.6949  | 2 V.ICVAVGD chr5@1063   | 3.49E-10 | 0.009392 |
| 12Oct2011 | 7033 | 861.98  | -14.4333 | 2 R.KTNLINIC chr4@4453  | 3.11E-10 | 0.008419 |
| 12Oct2011 | 6989 | 711.85  | -2.70508 | 2 R.SLHTLFST Splice@chr | 2.69E-11 | 6.22E-04 |
| 12Oct2011 | 5882 | 1345.63 | -24.7692 | 2 _QVREMH Splice@chr    | 1.88E-10 | 0.006018 |
| 12Oct2011 | 5840 | 1345.63 | -24.7692 | 2 _QVREMH Splice@chr    | 1.79E-11 | 6.22E-04 |
| 12Oct2011 | 4026 | 1025.62 | -1.90621 | 1 K.LGLGSGL chr5@4945   | 1.06E-10 | 0.002836 |
| 12Oct2011 | 3987 | 1025.62 | -1.90621 | 1 K.LGLGSGL chr5@4945   | 1.13E-11 | 3.33E-04 |
| 12Oct2011 | 7146 | 1288.71 | -10.8067 | 2 K.TKKQKKK chrX@6244   | 3.32E-10 | 0.008903 |
| 12Oct2011 | 4467 | 840.92  | -8.39688 | 2 F.FM+15.9 Splice@chr  | 1.48E-10 | 0.004181 |
| 12Oct2011 | 9367 | 792.4   | -17.4008 | 2 F.QFM+15. chr4@1546   | 2.05E-10 | 0.006788 |
| 12Oct2011 | 8640 | 677.68  | 20.26512 | 3 R.VFN VFSL Splice@chr | 2.48E-11 | 6.22E-04 |
| 12Oct2011 | 148  | 590.28  | -23.5115 | 2 K.IEKFYQQ\ chrX@8858  | 6.33E-11 | 0.001476 |
| 12Oct2011 | 8326 | 1049.53 | 15.08228 | 3 G.DQSVDS\ chr4@9163   | 2.05E-10 | 0.006788 |

|           |       |         |          |                         |          |          |
|-----------|-------|---------|----------|-------------------------|----------|----------|
| 12Oct2011 | 352   | 880.46  | 8.189425 | 1 R.DIDAYKR chr3@6737   | 3.48E-10 | 0.009392 |
| 12Oct2011 | 9168  | 757.43  | 9.360043 | 2 F.QVFENV\ chr3@8447   | 2.96E-11 | 6.22E-04 |
| 12Oct2011 | 5781  | 1345.63 | -24.7692 | 2 _QVREMH Splice@chr    | 6.48E-11 | 0.00176  |
| 12Oct2011 | 5662  | 1345.63 | -24.7692 | 2 _QVREMH Splice@chr    | 1.82E-10 | 0.004178 |
| 12Oct2011 | 2346  | 677.36  | 18.22915 | 2 K.KNAEIDE chr4@1337   | 2.18E-11 | 2.60E-04 |
| 12Oct2011 | 10992 | 1194.6  | 3.9886   | 2 K.NSNEQM Splice@chr   | 1.84E-14 | 0        |
| 12Oct2011 | 6305  | 966.47  | 15.71935 | 2 _QKNCKEI chrX@1368    | 1.16E-10 | 0.002155 |
| 12Oct2011 | 8944  | 1143.59 | 23.29106 | 2 K.NSRFLSK- chr1@8068  | 4.49E-10 | 0.009819 |
| 12Oct2011 | 6374  | 966.47  | 15.71935 | 2 _QKNCKEI chrX@1368    | 3.76E-10 | 0.008617 |
| 12Oct2011 | 1829  | 970.56  | 17.12321 | 1 _DSPIIRNR chr2@3547   | 4.38E-10 | 0.009653 |
| 12Oct2011 | 6262  | 966.47  | 15.71935 | 2 _QKNCKEI chrX@1368    | 3.62E-10 | 0.008197 |
| 12Oct2011 | 4809  | 717.93  | -1.61756 | 2 _EELRLQLI chr4@1110   | 2.90E-11 | 2.60E-04 |
| 12Oct2011 | 7418  | 687.41  | 21.43028 | 2 E.M+15.99 chr2@8546   | 1.67E-10 | 0.004178 |
| 12Oct2011 | 3268  | 706.4   | -6.92208 | 2 K.LK+14.01 chr1@1337  | 6.68E-11 | 9.85E-04 |
| 12Oct2011 | 7536  | 687.41  | 21.43028 | 2 E.M+15.99 chr2@8546   | 1.98E-10 | 0.004632 |
| 12Oct2011 | 5529  | 1225.56 | 9.200733 | 2 K.YEGAEEKS Splice@chr | 1.57E-11 | 2.60E-04 |
| 12Oct2011 | 3584  | 868.42  | -0.63154 | 1 K.SSSGSLSS chr2@1137  | 3.92E-10 | 0.008834 |
| 12Oct2011 | 5701  | 1345.63 | -24.7692 | 2 _QVREMH Splice@chr    | 3.18E-11 | 2.60E-04 |
| 12Oct2011 | 7500  | 687.41  | 21.43028 | 2 E.M+15.99 chr2@8546   | 2.94E-10 | 0.006963 |
| 12Oct2011 | 3864  | 678.83  | -9.90496 | 2 K.M+15.99 chr1@1451   | 1.66E-10 | 0.004178 |
| 12Oct2011 | 7460  | 687.41  | 21.43028 | 2 E.M+15.99 chr2@8546   | 1.68E-10 | 0.004178 |
| 12Oct2011 | 6551  | 998.51  | 16.13248 | 2 K.FFFEKCK( chr2@1310  | 3.88E-10 | 0.008617 |
| 12Oct2011 | 6357  | 966.47  | 15.71935 | 2 _QKNCKEI chrX@1368    | 2.16E-10 | 0.003075 |
| 12Oct2011 | 2261  | 841.48  | -16.3114 | 2 K.RTHTKKA chr5@6213   | 1.96E-10 | 0.00238  |
| 12Oct2011 | 6481  | 965.97  | 17.45768 | 2 _QKNCKEI chrX@1368    | 4.81E-10 | 0.006492 |
| 12Oct2011 | 5845  | 1345.13 | -23.5213 | 2 _QVREMH Splice@chr    | 9.08E-11 | 9.90E-04 |
| 12Oct2011 | 7360  | 930.5   | -8.05485 | 3 R.LVSHFGV chr5@1297   | 5.05E-11 | 5.05E-04 |
| 12Oct2011 | 6386  | 966.47  | 15.71935 | 2 _QKNCKEI chrX@1368    | 9.91E-11 | 9.90E-04 |
| 12Oct2011 | 11433 | 1195.1  | 2.583262 | 2 K.NSNEQM Splice@chr   | 2.06E-12 | 0        |
| 12Oct2011 | 5859  | 1225.55 | 1.023083 | 2 K.YEGAEEKS Splice@chr | 1.67E-10 | 0.002159 |
| 12Oct2011 | 5860  | 817.37  | 1.820903 | 3 K.YEGAEEKS Splice@chr | 2.18E-11 | 2.59E-04 |
| 12Oct2011 | 4521  | 840.92  | -8.39688 | 2 F.FM+15.99 Splice@chr | 2.14E-10 | 0.003075 |
| 12Oct2011 | 3879  | 567.97  | 24.7608  | 3 R.IACISLEKI chr1@1063 | 3.62E-10 | 0.005462 |
| 12Oct2011 | 6886  | 861.98  | -14.4333 | 2 R.KTNLINIC chr4@4453  | 6.43E-10 | 0.007921 |
| 12Oct2011 | 7212  | 1288.71 | -10.8067 | 2 K.TKKQKKK chrX@6247   | 4.14E-10 | 0.006301 |
| 12Oct2011 | 574   | 461.23  | 1.26361  | 2 K.WTEESIR chr5@1187   | 2.37E-10 | 0.003515 |
| 12Oct2011 | 9211  | 762.4   | 0.669255 | 3 _FYSM+15 chrX@9985    | 6.34E-10 | 0.007921 |
| 12Oct2011 | 7802  | 687.41  | 21.43028 | 2 E.M+15.99 chr2@8546   | 5.64E-10 | 0.007319 |
| 12Oct2011 | 4131  | 678.83  | -9.90496 | 2 K.M+15.99 chr1@1451   | 2.99E-10 | 0.005054 |
| 12Oct2011 | 5883  | 1345.13 | -23.5213 | 2 _QVREMH Splice@chr    | 5.28E-10 | 0.006909 |
| 12Oct2011 | 5922  | 1345.63 | -24.7692 | 2 _QVREMH Splice@chr    | 5.46E-10 | 0.007119 |
| 12Oct2011 | 7842  | 687.41  | 21.43028 | 2 E.M+15.99 chr2@8546   | 1.87E-10 | 0.00238  |
| 12Oct2011 | 4487  | 840.92  | -8.39688 | 2 F.FM+15.99 Splice@chr | 1.38E-10 | 0.001701 |
| 12Oct2011 | 7732  | 687.41  | 21.43028 | 2 E.M+15.99 chr2@8546   | 2.81E-10 | 0.005054 |
| 12Oct2011 | 4559  | 840.92  | -8.39688 | 2 F.FM+15.99 Splice@chr | 2.72E-10 | 0.004655 |
| 12Oct2011 | 6437  | 966.47  | 15.71935 | 2 _QKNCKEI chrX@1368    | 1.92E-10 | 0.00238  |
| 12Oct2011 | 7549  | 948.49  | -12.6902 | 2 K.RKRLSM+ Splice@chr  | 5.53E-10 | 0.007119 |

|           |       |         |          |                         |          |          |
|-----------|-------|---------|----------|-------------------------|----------|----------|
| 12Oct2011 | 7688  | 687.41  | 21.43028 | 2 E.M+15.99 chr2@8546   | 3.67E-10 | 0.005462 |
| 12Oct2011 | 8602  | 1090.54 | -8.93818 | 2 K.INGVTVA chr3@6296   | 8.28E-11 | 7.54E-04 |
| 12Oct2011 | 522   | 531.26  | -14.388  | 2 K.RMRGAD chr4@7697    | 1.71E-10 | 0.002159 |
| 12Oct2011 | 758   | 587.34  | 25.68426 | 2 K.EVQEKGF chr4@1030   | 3.11E-10 | 0.005054 |
| 12Oct2011 | 1276  | 696.37  | -15.3603 | 2 _LPTSPIG chr5@1204    | 1.21E-10 | 0.006042 |
| 12Oct2011 | 10363 | 1065.88 | -23.7545 | 3 K.INFKCTTL chr3@9674  | 5.62E-11 | 8.56E-04 |
| 12Oct2011 | 1069  | 401.74  | 27.30093 | 2 R.IEAGGGG chr5@8776   | 3.55E-10 | 0.008982 |
| 12Oct2011 | 7302  | 1049.53 | 15.08228 | 3 G.DQSVDS chr4@9165    | 1.32E-10 | 0.002687 |
| 12Oct2011 | 4055  | 560.82  | 28.56613 | 2 R.PDFSLNS chr3@3320   | 6.40E-13 | 0        |
| 12Oct2011 | 4935  | 977.48  | 10.31356 | 2 R.RTDEMC Splice@chr   | 3.54E-10 | 0.008982 |
| 12Oct2011 | 8374  | 744.97  | 13.86507 | 2 L.PM+15.9 Splice@chr  | 1.78E-10 | 0.003151 |
| 12Oct2011 | 5197  | 1345.63 | -24.7692 | 2 _QVREMH Splice@chr    | 7.77E-11 | 0.001396 |
| 12Oct2011 | 278   | 531.26  | -14.388  | 2 K.RMRGAD chr4@7697    | 6.79E-11 | 0.001396 |
| 12Oct2011 | 6819  | 687.41  | 21.43028 | 2 E.M+15.99 chr2@8546   | 9.96E-11 | 0.002463 |
| 12Oct2011 | 5186  | 1346.13 | -3.69865 | 2 _QVREMH Splice@chr    | 1.55E-10 | 0.002911 |
| 12Oct2011 | 7692  | 515.29  | -6.17134 | 3 K.PNFTVILS chr4@1642  | 2.22E-10 | 0.004146 |
| 12Oct2011 | 7431  | 1049.52 | 5.532542 | 3 G.DQSVDS chr4@9165    | 3.71E-10 | 0.009427 |
| 12Oct2011 | 3926  | 840.92  | -8.39688 | 2 F.FM+15.9 Splice@chr  | 6.77E-11 | 0.001396 |
| 12Oct2011 | 8462  | 938.98  | -23.6644 | 2 K.M+15.99 chr2@1197   | 8.17E-11 | 0.001671 |
| 12Oct2011 | 5160  | 1345.13 | -23.5213 | 2 _QVREMH Splice@chr    | 1.55E-10 | 0.002911 |
| 12Oct2011 | 4976  | 977.48  | 10.31356 | 2 R.RTDEMC Splice@chr   | 4.06E-11 | 5.78E-04 |
| 12Oct2011 | 7789  | 1176.58 | -5.31397 | 3 Q.RRNK+14 Splice@chr  | 1.27E-10 | 0.002687 |
| 12Oct2011 | 2599  | 729.36  | 23.96708 | 2 S.SRSFEEDF Splice@chr | 3.09E-10 | 0.00731  |
| 12Oct2011 | 568   | 632.78  | -25.4076 | 2 _KM+15.9 Splice@chr   | 2.61E-10 | 0.006619 |
| 12Oct2011 | 5216  | 897.42  | -27.6753 | 3 _QVREMH Splice@chr    | 1.36E-10 | 0.004775 |
| 12Oct2011 | 3662  | 678.83  | -9.90496 | 2 K.M+15.99 chr1@1451   | 3.48E-10 | 0.008215 |
| 12Oct2011 | 1883  | 876.41  | -8.50606 | 1 K.TEDEARR chrX@1138   | 4.26E-11 | 0.001727 |
| 12Oct2011 | 1860  | 876.41  | -8.50606 | 1 K.TEDEARR chrX@1138   | 2.07E-10 | 0.006179 |
| 12Oct2011 | 347   | 702.38  | 2.001521 | 1 _DAAGLAC chr3@2528    | 3.95E-10 | 0.008629 |
| 12Oct2011 | 4165  | 560.81  | 10.68504 | 2 R.PDFSLNS chr3@3320   | 3.71E-10 | 0.008408 |
| 12Oct2011 | 7874  | 1145.09 | 5.258106 | 2 P.YVAMRIN Splice@chr  | 3.90E-10 | 0.008408 |
| 12Oct2011 | 2387  | 535.61  | -17.2487 | 3 K.QVLEKFN chr5@1221   | 1.44E-10 | 0.005258 |
| 12Oct2011 | 7781  | 1090.53 | -18.1295 | 2 K.INGVTVA chr3@6296   | 1.02E-10 | 0.003767 |
| 12Oct2011 | 10616 | 1163.09 | -7.43413 | 2 K.M+15.99 Splice@chr  | 9.74E-11 | 0.003276 |
| 12Oct2011 | 4029  | 840.92  | -8.39688 | 2 F.FM+15.9 Splice@chr  | 1.26E-11 | 0        |
| 12Oct2011 | 4955  | 1225.56 | 9.200733 | 2 K.YEGAEEKS Splice@chr | 2.65E-11 | 0.001185 |
| 12Oct2011 | 6944  | 1000.17 | -22.2213 | 3 K.SQVFSTA chrX@6089   | 1.32E-13 | 0        |
| 12Oct2011 | 455   | 461.23  | 1.26361  | 2 K.WTEESIR chr5@1187   | 2.68E-10 | 0.007098 |
| 12Oct2011 | 1526  | 1047.52 | -10.006  | 2 P.HLCIGNT Splice@chr  | 5.47E-11 | 0.001984 |
| 12Oct2011 | 2648  | 557.83  | -5.59025 | 2 K.KSGQQIN chr4@5114   | 1.21E-10 | 0.004015 |
| 12Oct2011 | 8205  | 1152.08 | -1.56397 | 2 N.RNFLFFD chrX@1730   | 2.05E-10 | 0.006179 |
| 12Oct2011 | 52    | 722.35  | 3.723    | 1 R.FQGGGEI chr1@2595   | 3.33E-10 | 0.008008 |
| 12Oct2011 | 5264  | 1345.63 | -24.7692 | 2 _QVREMH Splice@chr    | 3.83E-10 | 0.008408 |
| 12Oct2011 | 5523  | 749.39  | -17.0141 | 2 _RLQHAN Splice@chr    | 4.41E-10 | 0.009785 |
| 12Oct2011 | 3562  | 1025.61 | -11.6755 | 1 K.LGLGSGL chr5@4945   | 1.94E-11 | 3.04E-04 |
| 12Oct2011 | 5035  | 1345.63 | -24.7692 | 2 _QVREMH Splice@chr    | 2.57E-10 | 0.005369 |
| 12Oct2011 | 8243  | 745.47  | 11.61036 | 2 L.PM+15.9 Splice@chr  | 8.48E-11 | 0.002746 |

|           |       |         |          |                         |          |          |
|-----------|-------|---------|----------|-------------------------|----------|----------|
| 12Oct2011 | 4961  | 1345.63 | -24.7692 | 2 _QVREMH Splice@chr    | 1.49E-11 | 9.38E-04 |
| 12Oct2011 | 1028  | 439.74  | 18.7116  | 2 R.SIAMFGP chr2@4157   | 5.13E-11 | 0.001975 |
| 12Oct2011 | 5000  | 1345.13 | -23.5213 | 2 _QVREMH Splice@chr    | 3.46E-10 | 0.006988 |
| 12Oct2011 | 1672  | 956.48  | -12.8509 | 1 K.YSNFPSIK chrX@1783  | 4.68E-10 | 0.008092 |
| 12Oct2011 | 7459  | 990.5   | -11.7554 | 2 F.RLSESELE chr4@7519  | 4.46E-10 | 0.007864 |
| 12Oct2011 | 6226  | 1288.7  | -18.58   | 2 K.TKKQKKK chrX@6244   | 2.35E-10 | 0.004879 |
| 12Oct2011 | 2690  | 693.87  | -6.6949  | 2 V.ICVAVGD chr5@1063   | 2.05E-10 | 0.004389 |
| 12Oct2011 | 7560  | 515.29  | -6.17134 | 3 K.PNFTVILS chr4@1642  | 1.20E-10 | 0.003227 |
| 12Oct2011 | 2284  | 535.61  | -17.2487 | 3 K.QVLEKFN chr5@1221   | 1.16E-11 | 6.36E-04 |
| 12Oct2011 | 1004  | 439.74  | 18.7116  | 2 R.SIAMFGP chr2@4157   | 3.52E-11 | 0.001727 |
| 12Oct2011 | 60    | 722.35  | 3.723    | 1 R.FQGGGEI chr1@2595   | 3.33E-10 | 0.00677  |
| 12Oct2011 | 5036  | 1345.13 | -23.5213 | 2 _QVREMH Splice@chr    | 4.35E-11 | 0.001727 |
| 12Oct2011 | 3386  | 678.83  | -9.90496 | 2 K.M+15.99 chr1@1451   | 2.96E-10 | 0.006307 |
| 12Oct2011 | 10068 | 1055.87 | -13.022  | 3 K.SGTIFDNI Splice@chr | 6.65E-11 | 0.002508 |
| 12Oct2011 | 7430  | 990.49  | -21.8765 | 2 F.RLSESELE chr4@7519  | 3.79E-10 | 0.007975 |
| 12Oct2011 | 1711  | 876.41  | -8.50606 | 1 K.TEDEARR chrX@1138   | 4.26E-11 | 5.59E-04 |
| 12Oct2011 | 5185  | 839.92  | -7.20271 | 2 K.YYNLLSEE chr5@8901  | 5.28E-10 | 0.009082 |
| 12Oct2011 | 3716  | 840.91  | -20.3215 | 2 F.FM+15.9! Splice@chr | 7.07E-11 | 0.001106 |
| 12Oct2011 | 1636  | 433.76  | 2.609238 | 2 _IVDLPGPI chr3@1104   | 1.45E-10 | 0.00237  |
| 12Oct2011 | 3103  | 696.37  | -15.3603 | 2 _LPTSPIGD chr5@1204   | 3.31E-10 | 0.006686 |
| 12Oct2011 | 1587  | 956.48  | -12.8509 | 1 K.YSNFPSIK chrX@1783  | 2.16E-10 | 0.003593 |
| 12Oct2011 | 4942  | 1345.13 | -23.5213 | 2 _QVREMH Splice@chr    | 2.56E-10 | 0.004791 |
| 12Oct2011 | 7544  | 515.29  | -6.17134 | 3 K.PNFTVILS chr4@1642  | 1.59E-10 | 0.00288  |
| 12Oct2011 | 953   | 439.74  | 18.7116  | 2 R.SIAMFGP chr2@4157   | 3.01E-10 | 0.005993 |
| 12Oct2011 | 2222  | 535.61  | -17.2487 | 3 K.QVLEKFN chr5@1221   | 5.69E-11 | 5.59E-04 |
| 12Oct2011 | 6075  | 765.37  | -7.07001 | 2 R.SIYEQRAI chr2@3639  | 3.55E-10 | 0.00716  |
| 12Oct2011 | 8631  | 853.45  | -23.3178 | 2 K.NFKINSKI chr4@5819  | 2.05E-10 | 0.003593 |
| 12Oct2011 | 1604  | 433.76  | 2.609238 | 2 _IVDLPGPI chr3@1104   | 2.02E-10 | 0.003593 |
| 12Oct2011 | 2153  | 424.24  | -9.13334 | 3 K.KNAEIAK Splice@chr  | 5.54E-10 | 0.009542 |
| 12Oct2011 | 6424  | 948.99  | -14.4606 | 2 K.RKRLSM+ Splice@chr  | 4.23E-10 | 0.007975 |
| 12Oct2011 | 5771  | 997.51  | -14.1484 | 2 R.FFFFMMNF Splice@chr | 4.30E-10 | 0.007975 |
| 12Oct2011 | 5011  | 1345.13 | -23.5213 | 2 _QVREMH Splice@chr    | 3.16E-10 | 0.006453 |
| 12Oct2011 | 5010  | 1345.63 | -24.7692 | 2 _QVREMH Splice@chr    | 5.47E-10 | 0.009312 |
| 12Oct2011 | 4974  | 1345.63 | -24.7692 | 2 _QVREMH Splice@chr    | 6.00E-11 | 8.31E-04 |
| 12Oct2011 | 46    | 816.46  | 2.544847 | 1 K.NDVAAAI Splice@chr  | 5.86E-11 | 5.59E-04 |
| 12Oct2011 | 5938  | 745.47  | 11.61036 | 2 L.PM+15.9! Splice@chr | 9.50E-11 | 0.003316 |
| 12Oct2011 | 3517  | 897.42  | -27.6753 | 3 _QVREMH Splice@chr    | 2.03E-10 | 0.004939 |
| 12Oct2011 | 5958  | 745.47  | 11.61036 | 2 L.PM+15.9! Splice@chr | 1.08E-10 | 0.003749 |
| 12Oct2011 | 3336  | 1225.56 | 9.200733 | 2 K.YEGAEEKS Splice@chr | 9.11E-11 | 0.003316 |
| 12Oct2011 | 3390  | 977.48  | 10.31356 | 2 R.RTDEMC' Splice@chr  | 2.00E-10 | 0.004939 |
| 12Oct2011 | 6135  | 843.45  | -16.7082 | 2 K.KMFPEKI chr1@3802   | 2.48E-10 | 0.00707  |
| 12Oct2011 | 1126  | 433.76  | 2.609238 | 2 _IVDLPGPI chr3@1104   | 8.98E-11 | 0.002374 |
| 12Oct2011 | 3601  | 1346.13 | -3.69865 | 2 _QVREMH Splice@chr    | 1.09E-10 | 0.002948 |
| 12Oct2011 | 3611  | 1345.63 | -24.7692 | 2 _QVREMH Splice@chr    | 1.88E-10 | 0.007941 |
| 12Oct2011 | 79    | 823.42  | -23.1545 | 2 R.KYEEVRY Splice@chr  | 1.81E-14 | 0        |
| 12Oct2011 | 3587  | 1345.63 | -24.7692 | 2 _QVREMH Splice@chr    | 9.56E-11 | 0.002374 |
| 12Oct2011 | 3115  | 468.28  | 28.44352 | 2 R.GQTRFV/ chr2@1274   | 1.17E-10 | 0.004127 |

|           |       |         |          |                         |          |          |
|-----------|-------|---------|----------|-------------------------|----------|----------|
| 12Oct2011 | 6565  | 629.66  | -21.9416 | 3 K.TLIEYHIFI chrX@5140 | 8.58E-11 | 0.003761 |
| 12Oct2011 | 2785  | 559.79  | 11.35993 | 2 R.DGWSIG chr4@4255    | 2.49E-10 | 0.00813  |
| 12Oct2011 | 2668  | 559.79  | 11.35993 | 2 R.DGWSIG chr4@4255    | 1.20E-10 | 0.004127 |
| 12Oct2011 | 4619  | 891.46  | 18.14164 | 2 K.K+14.016 chr1@2295  | 1.86E-11 | 4.71E-04 |
| 12Oct2011 | 8670  | 910.51  | -22.3017 | 1 R.VRLGDPF chr2@6150   | 2.18E-10 | 0.007431 |
| 12Oct2011 | 2460  | 632.84  | 19.19246 | 2 C.QVQNQR chr5@1934    | 1.09E-10 | 0.004127 |
| 12Oct2011 | 2855  | 559.79  | 11.35993 | 2 R.DGWSIG chr4@4255    | 1.70E-10 | 0.00601  |
| 12Oct2011 | 1248  | 876.41  | -8.50606 | 1 K.TEDEARR chrX@1138   | 4.26E-11 | 0.001763 |
| 12Oct2011 | 3084  | 468.28  | 28.44352 | 2 R.GQTFRV chr2@1274    | 2.77E-10 | 0.008785 |
| 12Oct2011 | 5473  | 1049.53 | 15.08228 | 3 G.DQSVDS chr4@9165    | 2.20E-10 | 0.006021 |
| 12Oct2011 | 6190  | 745.47  | 11.61036 | 2 L.PM+15.9 Splice@chr  | 2.10E-10 | 0.005613 |
| 12Oct2011 | 175   | 549.29  | -12.2451 | 2 _HKNFPD chr3@1042     | 5.38E-11 | 0.002534 |
| 12Oct2011 | 45    | 722.35  | 3.723    | 1 R.FQGGGEI chr1@2595   | 3.33E-10 | 0.009485 |
| 12Oct2011 | 78    | 823.42  | -23.1545 | 2 R.KYEEVRY Splice@chr  | 5.58E-13 | 0        |
| 12Oct2011 | 5811  | 1345.63 | -24.7692 | 2 _QVREMH Splice@chr    | 3.12E-10 | 0.009411 |
| 12Oct2011 | 1097  | 533.76  | 0.976743 | 2 G.FGGGGIS chr2@5085   | 1.38E-10 | 0.003686 |
| 12Oct2011 | 9009  | 910.98  | -23.6548 | 2 Y.FKNIDKD Splice@chr  | 3.22E-11 | 6.22E-04 |
| 12Oct2011 | 5735  | 1345.63 | -24.7692 | 2 _QVREMH Splice@chr    | 2.93E-11 | 6.22E-04 |
| 12Oct2011 | 5697  | 1345.63 | -24.7692 | 2 _QVREMH Splice@chr    | 1.69E-10 | 0.004483 |
| 12Oct2011 | 2932  | 729.36  | 23.96708 | 2 S.SRSFEED Splice@chr  | 2.62E-10 | 0.008159 |
| 12Oct2011 | 6573  | 861.97  | -26.066  | 2 R.KTNLINIC chr4@4455  | 4.49E-11 | 9.15E-04 |
| 12Oct2011 | 4225  | 450.25  | 28.36219 | 2 K.LLTDQTH chr5@1848   | 1.64E-10 | 0.004483 |
| 12Oct2011 | 6605  | 711.85  | -2.70508 | 2 R.SLHTLFST Splice@chr | 1.51E-10 | 0.003949 |
| 12Oct2011 | 5598  | 618.32  | 20.54522 | 3 K.QNEKQL Splice@chr   | 3.20E-10 | 0.009657 |
| 12Oct2011 | 1039  | 533.76  | 0.976743 | 2 G.FGGGGIS chr2@5085   | 1.30E-10 | 0.003429 |
| 12Oct2011 | 6633  | 711.85  | -2.70508 | 2 R.SLHTLFST Splice@chr | 7.60E-11 | 0.001768 |
| 12Oct2011 | 4326  | 840.91  | -20.3215 | 2 F.FM+15.9 Splice@chr  | 8.78E-11 | 0.002322 |
| 12Oct2011 | 9167  | 1090.53 | -18.1295 | 2 K.INGVTVA chr3@6296   | 2.37E-10 | 0.006329 |
| 12Oct2011 | 6299  | 840.91  | -20.3215 | 2 F.FM+15.9 Splice@chr  | 3.21E-10 | 0.007643 |
| 12Oct2011 | 6126  | 1345.63 | -24.7692 | 2 _QVREMH Splice@chr    | 1.93E-10 | 0.004413 |
| 12Oct2011 | 8422  | 1189.1  | 3.829779 | 2 _EFLEK+14 chr3@8481   | 3.28E-10 | 0.007643 |
| 12Oct2011 | 1007  | 533.76  | 0.976743 | 2 G.FGGGGIS chr2@5085   | 2.91E-10 | 0.007068 |
| 12Oct2011 | 6127  | 1345.13 | -23.5213 | 2 _QVREMH Splice@chr    | 2.67E-10 | 0.006879 |
| 12Oct2011 | 10810 | 772.71  | -23.9209 | 3 K.QSTKMK chr2@9078    | 3.14E-10 | 0.007643 |
| 12Oct2011 | 4441  | 738.89  | 6.865531 | 2 K.M+15.99 chr5@5476   | 2.19E-10 | 0.005922 |
| 12Oct2011 | 6258  | 840.92  | -8.39688 | 2 F.FM+15.9 Splice@chr  | 8.50E-11 | 9.30E-04 |
| 12Oct2011 | 3314  | 454.75  | 8.810814 | 2 K.TDLAYLG chr4@1545   | 4.77E-11 | 7.08E-04 |
| 12Oct2011 | 4153  | 678.83  | -9.90496 | 2 K.M+15.99 chr1@1451   | 4.60E-10 | 0.009981 |
| 12Oct2011 | 3358  | 507.28  | -4.17933 | 3 V.EFLRSGM chr3@6255   | 8.79E-11 | 9.30E-04 |
| 12Oct2011 | 9180  | 515.29  | -6.17134 | 3 K.PNFTVILS chr4@1642  | 3.72E-10 | 0.007798 |
| 12Oct2011 | 233   | 531.26  | -14.388  | 2 K.RMRGAD chr4@7697    | 3.33E-10 | 0.007643 |
| 12Oct2011 | 8906  | 1049.52 | 5.532542 | 3 G.DQSVDS chr4@9165    | 6.63E-11 | 9.30E-04 |
| 12Oct2011 | 9123  | 1090.53 | -18.1295 | 2 K.INGVTVA chr3@6296   | 2.44E-10 | 0.00672  |
| 12Oct2011 | 10392 | 745.08  | -17.6975 | 3 _SLK+14.0 chr5@1760   | 1.46E-10 | 0.002694 |
| 12Oct2011 | 6167  | 1345.63 | -24.7692 | 2 _QVREMH Splice@chr    | 1.26E-10 | 0.001592 |
| 12Oct2011 | 7805  | 1074.18 | -9.84143 | 3 R.QLVVMG Splice@chr   | 9.91E-11 | 0.001381 |
| 12Oct2011 | 11078 | 872.49  | -23.1585 | 2 R.VSCAEAK Splice@chr  | 3.78E-10 | 0.007798 |

|           |       |         |          |                         |          |          |
|-----------|-------|---------|----------|-------------------------|----------|----------|
| 12Oct2011 | 4712  | 560.81  | 10.68504 | 2 R.PDFSLNS chr3@3320   | 1.31E-10 | 0.002041 |
| 12Oct2011 | 8550  | 1040.53 | -29.1053 | 2 V.IFSKINKN chr5@1728  | 6.66E-11 | 9.30E-04 |
| 12Oct2011 | 6223  | 840.92  | -8.39688 | 2 F.FM+15.9! Splice@chr | 2.53E-10 | 0.00672  |
| 12Oct2011 | 10264 | 1029.5  | -20.037  | 2 R.ESRIETNC chr3@2035  | 1.27E-10 | 0.001592 |
| 12Oct2011 | 4595  | 840.91  | -20.3215 | 2 F.FM+15.9! Splice@chr | 2.49E-10 | 0.00672  |
| 12Oct2011 | 13016 | 1065.55 | -19.5698 | 3 K.INFKCTTL chr3@9674  | 4.28E-11 | 4.85E-04 |
| 12Oct2011 | 4278  | 559.79  | 11.35993 | 2 R.DGWSIG chr4@4255    | 2.96E-10 | 0.007276 |
| 12Oct2011 | 10968 | 853.45  | -23.3178 | 2 K.NFKINSKI chr4@5819  | 5.75E-11 | 0.002012 |
| 12Oct2011 | 6615  | 1345.63 | -24.7692 | 2 _QVREMH Splice@chr    | 5.40E-11 | 0.001829 |
| 12Oct2011 | 5029  | 468.28  | 28.44352 | 2 R.GQTFRV chr2@1274    | 1.18E-10 | 0.002321 |
| 12Oct2011 | 5933  | 565.83  | 14.11658 | 2 R.ISLTNANI chr5@7795  | 3.65E-10 | 0.007016 |
| 12Oct2011 | 4442  | 559.79  | 11.35993 | 2 R.DGWSIG chr4@4255    | 1.72E-10 | 0.003585 |
| 12Oct2011 | 8753  | 687.41  | 21.43028 | 2 E.M+15.99 chr2@8546   | 2.28E-10 | 0.003895 |
| 12Oct2011 | 4993  | 840.92  | -8.39688 | 2 F.FM+15.9! Splice@chr | 7.79E-11 | 0.002172 |
| 12Oct2011 | 6698  | 1346.13 | -3.69865 | 2 _QVREMH Splice@chr    | 4.33E-10 | 0.008178 |
| 12Oct2011 | 8157  | 1288.71 | -10.8067 | 2 K.TKKQKKK chrX@6244   | 1.78E-10 | 0.003759 |
| 12Oct2011 | 13441 | 1163.09 | -7.43413 | 2 K.M+15.99 Splice@chr  | 1.32E-10 | 0.002861 |
| 12Oct2011 | 8220  | 930.5   | -8.05485 | 3 R.LVSHFGV chr5@1297   | 3.58E-10 | 0.006842 |
| 12Oct2011 | 9698  | 515.29  | -6.17134 | 3 K.PNFTVILS chr4@1642  | 4.72E-10 | 0.009382 |
| 12Oct2011 | 4898  | 840.92  | -8.39688 | 2 F.FM+15.9! Splice@chr | 5.46E-11 | 0.001829 |
| 12Oct2011 | 6789  | 840.92  | -8.39688 | 2 F.FM+15.9! Splice@chr | 8.06E-11 | 0.002172 |
| 12Oct2011 | 4979  | 674.86  | -13.0428 | 2 K.ENESKSSI chr2@1080  | 1.53E-10 | 0.003041 |
| 12Oct2011 | 10898 | 853.45  | -23.3178 | 2 K.NFKINSKI chr4@5819  | 2.42E-10 | 0.004438 |
| 12Oct2011 | 6662  | 1345.13 | -23.5213 | 2 _QVREMH Splice@chr    | 1.48E-10 | 0.003041 |
| 12Oct2011 | 2386  | 433.55  | -23.4869 | 3 K.SLESLNRI chr3@1032  | 3.98E-10 | 0.007497 |
| 12Oct2011 | 10357 | 757.43  | 9.360043 | 2 F.QVFENV chr3@8444    | 6.57E-11 | 0.002012 |
| 12Oct2011 | 6620  | 1345.13 | -23.5213 | 2 _QVREMH Splice@chr    | 1.02E-10 | 0.002321 |
| 12Oct2011 | 79    | 722.35  | 3.723    | 1 R.FQGGGEI chr1@2595   | 3.33E-10 | 0.006335 |
| 12Oct2011 | 8713  | 687.41  | 21.43028 | 2 E.M+15.99 chr2@8546   | 1.63E-11 | 6.61E-04 |
| 12Oct2011 | 8478  | 923.03  | 20.76567 | 2 R.TLNNLKV chr2@1060   | 1.66E-10 | 0.003215 |
| 12Oct2011 | 9658  | 515.29  | -6.17134 | 3 K.PNFTVILS chr4@1642  | 1.23E-10 | 0.0027   |
| 12Oct2011 | 4130  | 868.43  | 10.92162 | 1 K.SSSGSLSS chr2@1132  | 1.40E-10 | 0.002861 |
| 12Oct2011 | 9542  | 762.4   | 0.669255 | 3 _FYSM+15 chrX@9985    | 3.23E-10 | 0.006164 |
| 12Oct2011 | 6875  | 840.92  | -8.39688 | 2 F.FM+15.9! Splice@chr | 7.99E-11 | 0.002172 |
| 12Oct2011 | 4397  | 559.79  | 11.35993 | 2 R.DGWSIG chr4@4255    | 7.52E-11 | 0.002172 |
| 12Oct2011 | 6703  | 1345.63 | -24.7692 | 2 _QVREMH Splice@chr    | 6.75E-11 | 0.002172 |
| 12Oct2011 | 4943  | 840.92  | -8.39688 | 2 F.FM+15.9! Splice@chr | 4.61E-11 | 0.001639 |
| 12Oct2011 | 10391 | 757.43  | 9.360043 | 2 F.QVFENV chr3@8444    | 1.37E-11 | 6.61E-04 |
| 12Oct2011 | 8669  | 687.41  | 21.43028 | 2 E.M+15.99 chr2@8546   | 3.60E-10 | 0.006842 |
| 12Oct2011 | 3020  | 535.61  | -17.2487 | 3 K.QVLEKFN chr5@1221   | 8.43E-11 | 0.002172 |
| 12Oct2011 | 6828  | 840.91  | -20.3215 | 2 F.FM+15.9! Splice@chr | 1.52E-10 | 0.003041 |
| 12Oct2011 | 4603  | 559.79  | 11.35993 | 2 R.DGWSIG chr4@4255    | 9.77E-11 | 0.002363 |
| 12Oct2011 | 10397 | 757.43  | 9.360043 | 2 F.QVFENV chr3@8444    | 2.38E-11 | 9.46E-04 |
| 12Oct2011 | 7978  | 711.85  | -2.70508 | 2 R.SLHTLFST Splice@chr | 1.95E-10 | 0.00457  |
| 12Oct2011 | 5139  | 840.92  | -8.39688 | 2 F.FM+15.9! Splice@chr | 1.67E-10 | 0.003363 |
| 12Oct2011 | 5046  | 840.92  | -8.39688 | 2 F.FM+15.9! Splice@chr | 2.25E-10 | 0.004929 |
| 12Oct2011 | 8852  | 687.41  | 21.43028 | 2 E.M+15.99 chr2@8546   | 1.24E-10 | 0.002363 |

|           |       |         |          |                         |          |          |
|-----------|-------|---------|----------|-------------------------|----------|----------|
| 12Oct2011 | 7069  | 724.9   | -9.19028 | 2 R.LTFTLTRF chr3@8571  | 4.86E-10 | 0.009953 |
| 12Oct2011 | 5085  | 840.92  | -8.39688 | 2 F.FM+15.9! Splice@chr | 6.82E-11 | 0.002221 |
| 12Oct2011 | 10427 | 757.93  | 7.142486 | 2 F.QVFENV\ chr3@8444   | 7.07E-11 | 0.002221 |
| 12Oct2011 | 2583  | 841.48  | -16.3114 | 2 K.RTHTKKA chr5@6215   | 2.83E-10 | 0.005468 |
| 12Oct2011 | 77    | 722.35  | 3.723    | 1 R.FQGGGEI chr1@2595   | 3.38E-10 | 0.007594 |
| 12Oct2011 | 4768  | 559.79  | 11.35993 | 2 R.DGWSIG chr4@4255    | 2.48E-10 | 0.005108 |
| 12Oct2011 | 6979  | 840.92  | -8.39688 | 2 F.FM+15.9! Splice@chr | 1.46E-10 | 0.00275  |
| 12Oct2011 | 1396  | 439.74  | 18.7116  | 2 R.SIAMFGP chr2@4157   | 4.12E-11 | 0.001376 |
| 12Oct2011 | 4525  | 514.31  | 24.70002 | 2 _IGGIGTVF Splice@chr  | 4.83E-10 | 0.009953 |
| 12Oct2011 | 2481  | 433.76  | 2.609238 | 2 _IVDLP GPI chr3@1104  | 1.37E-10 | 0.002556 |
| 12Oct2011 | 2533  | 433.55  | -23.4869 | 3 K.SLESLNRI chr3@1032  | 2.22E-10 | 0.004929 |
| 12Oct2011 | 9002  | 1040.53 | -29.1053 | 2 V.IFSKINKN chr5@1728  | 4.58E-10 | 0.009591 |
| 12Oct2011 | 4891  | 566.31  | 21.45326 | 2 R.EVAQLEC chr5@1706   | 3.67E-10 | 0.008137 |
| 12Oct2011 | 1804  | 946.5   | 4.583344 | 1 K.DSQLNLT chr3@6015   | 2.22E-10 | 0.004929 |
| 12Oct2011 | 2441  | 433.76  | 2.609238 | 2 _IVDLP GPI chr3@1104  | 8.24E-11 | 0.002363 |
| 12Oct2011 | 6820  | 1345.13 | -23.5213 | 2 _QVREMH Splice@chr    | 1.08E-10 | 0.002363 |
| 12Oct2011 | 8027  | 711.85  | -2.70508 | 2 R.SLHTLFST Splice@chr | 2.67E-10 | 0.005468 |
| 12Oct2011 | 9778  | 515.29  | -6.17134 | 3 K.PNFTVILS chr4@1642  | 3.09E-10 | 0.00623  |
| 12Oct2011 | 5170  | 468.28  | 28.44352 | 2 R.GQTRV\ chr2@1274    | 4.08E-10 | 0.008874 |
| 12Oct2011 | 6505  | 635.82  | -23.8438 | 2 R.FSWFAQI chr5@1137   | 1.24E-10 | 0.002363 |
| 12Oct2011 | 8889  | 687.41  | 21.43028 | 2 E.M+15.99 chr2@8546   | 3.70E-10 | 0.008137 |
| 12Oct2011 | 4555  | 559.79  | 11.35993 | 2 R.DGWSIG chr4@4255    | 8.61E-11 | 0.002363 |
| 12Oct2011 | 9739  | 515.29  | -6.17134 | 3 K.PNFTVILS chr4@1642  | 4.01E-10 | 0.008874 |
| 12Oct2011 | 6934  | 840.92  | -8.39688 | 2 F.FM+15.9! Splice@chr | 2.83E-10 | 0.005468 |
| 12Oct2011 | 10430 | 757.42  | -3.87312 | 2 F.QVFENV\ chr3@8444   | 1.03E-10 | 0.002363 |
| 12Oct2011 | 9183  | 1040.53 | -29.1053 | 2 V.IFSKINKN chr5@1728  | 1.15E-11 | 2.53E-04 |
| 12Oct2011 | 14244 | 1093.55 | 2.630054 | 1 K.NLSENVN chr4@1314   | 3.26E-10 | 0.005622 |
| 12Oct2011 | 9068  | 687.41  | 21.43028 | 2 E.M+15.99 chr2@8546   | 4.26E-10 | 0.006041 |
| 12Oct2011 | 5239  | 840.92  | -8.39688 | 2 F.FM+15.9! Splice@chr | 2.38E-10 | 0.003783 |
| 12Oct2011 | 3828  | 984.03  | -25.0834 | 2 K.KQYQRA\ chrX@3787   | 3.54E-10 | 0.005775 |
| 12Oct2011 | 7260  | 840.92  | -8.39688 | 2 F.FM+15.9! Splice@chr | 3.26E-10 | 0.005622 |
| 12Oct2011 | 13708 | 1041.53 | -26.1431 | 2 F.K+14.016 chr3@8906  | 3.55E-11 | 5.50E-04 |
| 12Oct2011 | 6899  | 1173.5  | -13.1731 | 3 K.PTMRTCC Splice@chr  | 7.18E-13 | 0        |
| 12Oct2011 | 13740 | 1194.6  | 3.9886   | 2 K.NSNEQM Splice@chr   | 2.08E-13 | 0        |
| 12Oct2011 | 13689 | 1041.53 | -26.1431 | 2 F.K+14.016 chr3@8906  | 1.58E-11 | 1.94E-04 |
| 12Oct2011 | 5281  | 840.92  | -8.39688 | 2 F.FM+15.9! Splice@chr | 1.62E-10 | 0.002527 |
| 12Oct2011 | 7167  | 840.92  | -8.39688 | 2 F.FM+15.9! Splice@chr | 1.44E-10 | 0.002033 |
| 12Oct2011 | 3093  | 677.36  | 18.22915 | 2 K.KNAEIDEI chr4@1337  | 5.69E-10 | 0.009227 |
| 12Oct2011 | 7215  | 840.92  | -8.39688 | 2 F.FM+15.9! Splice@chr | 3.14E-11 | 5.50E-04 |
| 12Oct2011 | 3168  | 535.61  | -17.2487 | 3 K.QVLEKFN chr5@1221   | 2.70E-10 | 0.005055 |
| 12Oct2011 | 9083  | 981.5   | -16.3859 | 1 R.FVEDML\ chr1@8550   | 1.14E-10 | 0.001546 |
| 12Oct2011 | 13710 | 1194.6  | 3.9886   | 2 K.NSNEQM Splice@chr   | 9.84E-16 | 0        |
| 12Oct2011 | 13709 | 1195.1  | 2.583262 | 2 K.NSNEQM Splice@chr   | 2.01E-15 | 0        |
| 12Oct2011 | 10101 | 515.29  | -6.17134 | 3 K.PNFTVILS chr4@1642  | 5.01E-10 | 0.008497 |
| 12Oct2011 | 13729 | 1195.1  | 2.583262 | 2 K.NSNEQM Splice@chr   | 2.76E-15 | 0        |
| 12Oct2011 | 1916  | 946.5   | 4.583344 | 1 K.DSQLNLT chr3@6015   | 4.05E-10 | 0.00589  |
| 12Oct2011 | 13641 | 792.15  | -18.5783 | 4 K.SGTIFDNI Splice@chr | 2.59E-12 | 0        |

|           |       |         |          |                         |          |          |
|-----------|-------|---------|----------|-------------------------|----------|----------|
| 12Oct2011 | 5378  | 840.91  | -20.3215 | 2 F.FM+15.9! Splice@chr | 1.96E-10 | 0.002994 |
| 12Oct2011 | 9174  | 687.41  | 21.43028 | 2 E.M+15.99. chr2@8546  | 2.26E-10 | 0.003298 |
| 12Oct2011 | 7109  | 1345.63 | -24.7692 | 2 _QVREMH Splice@chr    | 2.87E-10 | 0.006521 |
| 12Oct2011 | 7162  | 1345.63 | -24.7692 | 2 _QVREMH Splice@chr    | 2.01E-10 | 0.004372 |
| 12Oct2011 | 13889 | 1194.6  | 3.9886   | 2 K.NSNEQM Splice@chr   | 7.21E-16 | 0        |
| 12Oct2011 | 5507  | 468.28  | 28.44352 | 2 R.GQTFRV! chr2@1274   | 1.97E-10 | 0.004235 |
| 12Oct2011 | 6970  | 618.32  | 20.54522 | 3 K.QNEKQL\ Splice@chr  | 1.49E-10 | 0.002643 |
| 12Oct2011 | 2025  | 946.5   | 4.583344 | 1 K.DSQLNLT chr3@6015   | 2.22E-10 | 0.004836 |
| 12Oct2011 | 5389  | 840.92  | -8.39688 | 2 F.FM+15.9! Splice@chr | 1.22E-10 | 0.002509 |
| 12Oct2011 | 4819  | 1025.62 | -1.90621 | 1 K.LGLGSGL chr5@4945   | 1.12E-11 | 3.76E-04 |
| 12Oct2011 | 10116 | 1049.52 | 5.532542 | 3 G.DQSVDS! chr4@9165   | 4.04E-10 | 0.009506 |
| 12Oct2011 | 3420  | 535.61  | -17.2487 | 3 K.QVLEKFN chr5@1221   | 2.04E-11 | 5.55E-04 |
| 12Oct2011 | 3342  | 677.36  | 18.22915 | 2 K.KNAEIDE! chr4@1337  | 2.50E-11 | 5.55E-04 |
| 12Oct2011 | 3941  | 693.87  | -6.6949  | 2 V.ICVAVGD chr5@1065   | 2.38E-10 | 0.004978 |
| 12Oct2011 | 5468  | 840.92  | -8.39688 | 2 F.FM+15.9! Splice@chr | 2.71E-10 | 0.006225 |
| 12Oct2011 | 13877 | 1041.53 | -26.1431 | 2 F.K+14.016 chr3@8906  | 1.45E-10 | 0.002643 |
| 12Oct2011 | 7348  | 840.91  | -20.3215 | 2 F.FM+15.9! Splice@chr | 1.04E-10 | 0.001861 |
| 12Oct2011 | 4808  | 878.43  | 15.86037 | 1 K.FGNFHEK chr3@1138   | 3.40E-10 | 0.008491 |
| 12Oct2011 | 3428  | 677.36  | 18.22915 | 2 K.KNAEIDE! chr4@1337  | 2.34E-11 | 5.55E-04 |
| 12Oct2011 | 7163  | 1345.13 | -23.5213 | 2 _QVREMH Splice@chr    | 2.55E-10 | 0.005295 |
| 12Oct2011 | 13893 | 1041.53 | -26.1431 | 2 F.K+14.016 chr3@8906  | 5.74E-11 | 0.001223 |
| 12Oct2011 | 3386  | 677.36  | 18.22915 | 2 K.KNAEIDE! chr4@1337  | 2.35E-11 | 5.55E-04 |
| 12Oct2011 | 7283  | 1173.17 | -9.30319 | 3 K.PTMRTCC Splice@chr  | 1.03E-11 | 1.95E-04 |
| 12Oct2011 | 8802  | 930.5   | -8.05485 | 3 R.LVSHFGV chr5@1297   | 2.24E-10 | 0.004836 |
| 12Oct2011 | 13904 | 1194.6  | 3.9886   | 2 K.NSNEQM Splice@chr   | 1.33E-14 | 0        |
| 12Oct2011 | 13903 | 1195.1  | 2.583262 | 2 K.NSNEQM Splice@chr   | 7.82E-15 | 0        |
| 12Oct2011 | 7216  | 1345.63 | -24.7692 | 2 _QVREMH Splice@chr    | 5.38E-12 | 1.95E-04 |
| 12Oct2011 | 10274 | 515.29  | -6.17134 | 3 K.PNFTVILS chr4@1642  | 3.36E-10 | 0.008021 |
| 12Oct2011 | 9234  | 687.41  | 21.43028 | 2 E.M+15.99. chr2@8546  | 2.20E-10 | 0.004836 |
| 12Oct2011 | 13887 | 1195.11 | 10.96955 | 2 K.NSNEQM Splice@chr   | 1.05E-14 | 0        |
| 12Oct2011 | 12114 | 1113.93 | -22.5214 | 3 K.LEPELEPK chr5@1486  | 1.70E-11 | 3.76E-04 |
| 12Oct2011 | 5571  | 839.91  | -19.1345 | 2 K.YYNLLSEE chr5@8901  | 6.55E-11 | 0.001223 |
| 12Oct2011 | 7729  | 1079.51 | -11.3024 | 3 R.QLVVM+ Splice@chr   | 4.30E-11 | 8.97E-04 |
| 12Oct2011 | 2199  | 934.43  | -21.1405 | 1 _TSQSTM! chrX@3696    | 3.30E-10 | 0.007878 |
| 12Oct2011 | 13827 | 792.15  | -18.5783 | 4 K.SGTIFDNI Splice@chr | 2.02E-12 | 1.95E-04 |
| 12Oct2011 | 12412 | 665.37  | -26.6417 | 2 Q.INNK+14 Splice@chr  | 4.24E-10 | 0.009924 |
| 12Oct2011 | 3333  | 535.61  | -17.2487 | 3 K.QVLEKFN chr5@1221   | 2.94E-11 | 7.26E-04 |
| 12Oct2011 | 7682  | 1079.51 | -11.3024 | 3 R.QLVVM+ Splice@chr   | 1.73E-11 | 3.76E-04 |
| 12Oct2011 | 6769  | 1225.56 | 9.200733 | 2 K.YEGAEEKS Splice@chr | 5.84E-12 | 1.95E-04 |
| 12Oct2011 | 122   | 722.35  | 3.723    | 1 R.FQGGGEI chr1@2595   | 3.33E-10 | 0.008021 |
| 12Oct2011 | 9358  | 687.41  | 21.43028 | 2 E.M+15.99. chr2@8546  | 3.09E-10 | 0.007441 |
| 12Oct2011 | 4605  | 868.42  | -0.63154 | 1 K.SSSGSLSS chr2@1132  | 1.40E-10 | 0.002643 |
| 12Oct2011 | 7390  | 840.92  | -8.39688 | 2 F.FM+15.9! Splice@chr | 7.26E-11 | 0.001545 |
| 12Oct2011 | 9482  | 1040.53 | -29.1053 | 2 V.IFSKINKN chr5@1728  | 3.25E-10 | 0.007878 |
| 12Oct2011 | 8513  | 861.97  | -26.066  | 2 R.KTNLINIC chr4@4455  | 2.80E-10 | 0.006521 |
| 12Oct2011 | 7298  | 840.92  | -8.39688 | 2 F.FM+15.9! Splice@chr | 2.70E-10 | 0.006225 |
| 12Oct2011 | 3989  | 984.03  | -25.0834 | 2 K.KQYQRA! chrX@3787   | 3.62E-10 | 0.008764 |

|           |      |         |          |                         |          |          |
|-----------|------|---------|----------|-------------------------|----------|----------|
| 12Oct2011 | 3722 | 1345.13 | -23.5213 | 2 _QVREMH Splice@chr    | 4.56E-11 | 0.004137 |
| 12Oct2011 | 7353 | 1003.53 | 22.67704 | 3 R.CWNRRA Splice@chr   | 1.00E-10 | 0.006094 |
| 12Oct2011 | 4455 | 711.85  | -2.70508 | 2 R.SLHTLFST Splice@chr | 1.50E-10 | 0.009667 |
| 12Oct2011 | 4494 | 711.85  | -2.70508 | 2 R.SLHTLFST Splice@chr | 1.82E-11 | 0.002502 |
| 12Oct2011 | 7217 | 1003.19 | 17.13413 | 3 R.CWNRRA Splice@chr   | 3.07E-12 | 0        |
| 12Oct2011 | 1124 | 876.41  | -8.50606 | 1 K.TEDEARR chrX@1138   | 4.26E-11 | 0.002826 |
| 12Oct2011 | 5630 | 515.29  | -6.17134 | 3 K.PNFTVILS chr4@1642  | 1.18E-10 | 0.005735 |
| 12Oct2011 | 5892 | 858.95  | -13.0187 | 2 R.RASFPNR chr3@1375   | 2.19E-10 | 0.008437 |
| 12Oct2011 | 1151 | 604.31  | 24.98924 | 2 K.ERDRYSP chr5@7314   | 6.81E-11 | 0.003784 |
| 12Oct2011 | 3003 | 1353.63 | 17.44783 | 2 K.WPECKSI chr2@1179   | 6.50E-11 | 0.0023   |
| 12Oct2011 | 3123 | 1225.56 | 9.200733 | 2 K.YEGAEEKS Splice@chr | 8.19E-13 | 0        |
| 12Oct2011 | 3293 | 1345.63 | -24.7692 | 2 _QVREMH Splice@chr    | 1.26E-10 | 0.00335  |
| 12Oct2011 | 4879 | 1049.53 | 15.08228 | 3 G.DQSVDSI chr4@9165   | 1.36E-10 | 0.00384  |
| 12Oct2011 | 2064 | 544.63  | 2.73503  | 3 K.PTNQK+1 Splice@chr  | 7.56E-11 | 0.0023   |
| 12Oct2011 | 3137 | 1345.13 | -23.5213 | 2 _QVREMH Splice@chr    | 3.70E-10 | 0.009325 |
| 12Oct2011 | 105  | 823.42  | -23.1545 | 2 R.KYEEVRY Splice@chr  | 3.27E-12 | 7.89E-04 |
| 12Oct2011 | 3839 | 861.97  | -26.066  | 2 R.KTNLINIC chr4@4455  | 3.75E-10 | 0.009852 |
| 12Oct2011 | 4698 | 1049.53 | 15.08228 | 3 G.DQSVDSI chr4@9165   | 3.05E-10 | 0.00831  |
| 12Oct2011 | 3255 | 724.9   | -9.19028 | 2 R.LTFTLTRF chr3@8571  | 3.74E-10 | 0.009852 |
| 12Oct2011 | 2207 | 507.28  | -4.17933 | 3 V.EFLRSGM chr3@6255   | 1.61E-10 | 0.007781 |
| 12Oct2011 | 2821 | 559.79  | 11.35993 | 2 R.DGWSIGI chr4@4255   | 2.38E-10 | 0.009878 |
| 12Oct2011 | 853  | 597.29  | 3.536191 | 2 R.CWNRDK chrX@1392    | 5.91E-11 | 0.001812 |
| 12Oct2011 | 3136 | 565.32  | 1.153692 | 3 W.ELEIKNC chr4@1215   | 1.73E-10 | 0.008412 |
| 12Oct2011 | 4439 | 1345.63 | -24.7692 | 2 _QVREMH Splice@chr    | 1.15E-10 | 0.005901 |
| 12Oct2011 | 2258 | 604.83  | -0.40433 | 2 K.SISFSPD Splice@chr  | 1.41E-10 | 0.006833 |
| 12Oct2011 | 4477 | 1345.63 | -24.7692 | 2 _QVREMH Splice@chr    | 1.86E-10 | 0.008713 |
| 12Oct2011 | 4828 | 749.39  | -17.0141 | 2 _RLQHAN Splice@chr    | 4.99E-12 | 4.41E-04 |
| 12Oct2011 | 4402 | 1345.13 | -23.5213 | 2 _QVREMH Splice@chr    | 1.43E-11 | 0.001303 |
| 12Oct2011 | 4672 | 749.39  | -17.0141 | 2 _RLQHAN Splice@chr    | 3.02E-11 | 0.001303 |
| 12Oct2011 | 1940 | 535.61  | -17.2487 | 3 K.QVLEKFN chr5@1221   | 3.08E-10 | 0.009782 |
| 12Oct2011 | 3054 | 559.79  | 11.35993 | 2 R.DGWSIGI chr4@4255   | 1.16E-11 | 0.001303 |
| 12Oct2011 | 4430 | 1345.63 | -24.7692 | 2 _QVREMH Splice@chr    | 2.00E-10 | 0.006996 |
| 12Oct2011 | 6720 | 515.29  | -6.17134 | 3 K.PNFTVILS chr4@1642  | 1.31E-10 | 0.004723 |
| 12Oct2011 | 4397 | 1345.63 | -24.7692 | 2 _QVREMH Splice@chr    | 6.59E-11 | 0.001717 |
| 12Oct2011 | 3211 | 559.79  | 11.35993 | 2 R.DGWSIGI chr4@4255   | 2.23E-10 | 0.007686 |
| 12Oct2011 | 8033 | 665.37  | -26.6417 | 2 Q.INNK+14 Splice@chr  | 2.87E-10 | 0.009782 |
| 12Oct2011 | 5206 | 1225.56 | 9.200733 | 2 K.YEGAEEKS Splice@chr | 1.13E-11 | 0        |
| 12Oct2011 | 8206 | 515.29  | -6.17134 | 3 K.PNFTVILS chr4@1642  | 3.26E-10 | 0.008711 |
| 12Oct2011 | 4094 | 840.92  | -8.39688 | 2 F.FM+15.95 Splice@chr | 9.89E-11 | 0.00305  |
| 12Oct2011 | 65   | 722.35  | 3.723    | 1 R.FQGGGEI chr1@2595   | 3.33E-10 | 0.008961 |
| 12Oct2011 | 8769 | 757.43  | 9.360043 | 2 F.QVFENV\ chr3@8444   | 4.42E-12 | 0        |
| 12Oct2011 | 7382 | 687.41  | 21.43028 | 2 E.M+15.99 chr2@8546   | 1.87E-10 | 0.006143 |
| 12Oct2011 | 210  | 531.26  | -14.388  | 2 K.RMRGAD chr4@7697    | 8.11E-11 | 0.002537 |
| 12Oct2011 | 209  | 531.26  | -14.388  | 2 K.RMRGAD chr4@7697    | 1.05E-10 | 0.00305  |
| 12Oct2011 | 6524 | 711.85  | -2.70508 | 2 R.SLHTLFST Splice@chr | 1.74E-10 | 0.005627 |
| 12Oct2011 | 5435 | 1345.13 | -23.5213 | 2 _QVREMH Splice@chr    | 1.18E-10 | 0.00358  |
| 12Oct2011 | 4046 | 560.82  | 28.56613 | 2 R.PDFSLNS chr3@3320   | 1.67E-10 | 0.005627 |

|           |       |         |          |                         |          |          |
|-----------|-------|---------|----------|-------------------------|----------|----------|
| 12Oct2011 | 7339  | 687.41  | 21.43028 | 2 E.M+15.99 chr2@8546   | 2.49E-10 | 0.00755  |
| 12Oct2011 | 3094  | 706.4   | -6.92208 | 2 K.LK+14.01 chr1@1334  | 1.01E-10 | 0.00305  |
| 12Oct2011 | 5562  | 1345.13 | -23.5213 | 2 _QVREMH Splice@chr    | 1.32E-10 | 0.004362 |
| 12Oct2011 | 5596  | 840.92  | -8.39688 | 2 F.FM+15.9 Splice@chr  | 1.32E-10 | 0.004362 |
| 12Oct2011 | 6481  | 711.85  | -2.70508 | 2 R.SLHTLFST Splice@chr | 1.00E-10 | 0.00305  |
| 12Oct2011 | 4118  | 468.28  | 28.44352 | 2 R.GQTRFRV chr2@1274   | 2.66E-10 | 0.007794 |
| 12Oct2011 | 9265  | 853.46  | -11.5687 | 2 K.NFKINSKI chr4@5819  | 3.28E-10 | 0.008711 |
| 12Oct2011 | 1331  | 947.5   | 21.47418 | 1 R.DLTNDITI Splice@chr | 2.07E-10 | 0.004767 |
| 12Oct2011 | 7326  | 1049.53 | 15.08228 | 3 G.DQSVDS chr4@9163    | 4.45E-11 | 3.12E-04 |
| 12Oct2011 | 1719  | 460.24  | -13.7557 | 2 _ATDGSSII chr5@1148   | 1.53E-10 | 0.00315  |
| 12Oct2011 | 4920  | 1225.56 | 9.200733 | 2 K.YEGAESK Splice@chr  | 1.36E-10 | 0.002318 |
| 12Oct2011 | 3158  | 706.4   | -6.92208 | 2 K.LK+14.01 chr1@1334  | 4.56E-11 | 3.12E-04 |
| 12Oct2011 | 6739  | 687.41  | 21.43028 | 2 E.M+15.99 chr2@8546   | 2.11E-10 | 0.004767 |
| 12Oct2011 | 6080  | 861.97  | -26.066  | 2 R.KTNLINIC chr4@4453  | 2.57E-10 | 0.006927 |
| 12Oct2011 | 5263  | 840.92  | -8.39688 | 2 F.FM+15.9 Splice@chr  | 6.06E-11 | 8.91E-04 |
| 12Oct2011 | 5198  | 1345.63 | -24.7692 | 2 _QVREMH Splice@chr    | 1.04E-10 | 0.001473 |
| 12Oct2011 | 5199  | 1345.13 | -23.5213 | 2 _QVREMH Splice@chr    | 2.22E-10 | 0.004767 |
| 12Oct2011 | 8090  | 757.93  | 7.142486 | 2 F.QVFENV chr3@8444    | 5.89E-11 | 8.91E-04 |
| 12Oct2011 | 3975  | 840.92  | -8.39688 | 2 F.FM+15.9 Splice@chr  | 2.98E-10 | 0.007383 |
| 12Oct2011 | 1366  | 946.5   | 4.583344 | 1 K.DSQLNLT chr3@6013   | 2.22E-10 | 0.004767 |
| 12Oct2011 | 4109  | 468.28  | 28.44352 | 2 R.GQTRFRV chr2@1274   | 1.19E-10 | 0.001758 |
| 12Oct2011 | 1980  | 841.48  | -16.3114 | 2 K.RTHTKKA chr5@6213   | 3.23E-10 | 0.008435 |
| 12Oct2011 | 2411  | 535.61  | -17.2487 | 3 K.QVLEKFN chr5@1221   | 2.62E-10 | 0.007166 |
| 12Oct2011 | 5510  | 891.45  | 6.893886 | 2 K.K+14.016 chr1@2299  | 5.47E-11 | 6.17E-04 |
| 12Oct2011 | 6793  | 687.41  | 21.43028 | 2 E.M+15.99 chr2@8546   | 1.35E-10 | 0.002318 |
| 12Oct2011 | 5124  | 1345.63 | -24.7692 | 2 _QVREMH Splice@chr    | 3.48E-10 | 0.009209 |
| 12Oct2011 | 4074  | 468.28  | 28.44352 | 2 R.GQTRFRV chr2@1274   | 3.33E-10 | 0.008681 |
| 12Oct2011 | 1757  | 971.56  | 2.079638 | 1 R.NGQLNRI Splice@chr  | 1.80E-10 | 0.00425  |
| 12Oct2011 | 10372 | 1163.09 | -7.43413 | 2 K.M+15.99 Splice@chr  | 2.11E-10 | 0.004767 |
| 12Oct2011 | 3117  | 706.4   | -6.92208 | 2 K.LK+14.01 chr1@1334  | 1.06E-10 | 0.001473 |
| 12Oct2011 | 3999  | 560.82  | 28.56613 | 2 R.PDFSLNS chr3@3320   | 2.75E-10 | 0.007166 |
| 12Oct2011 | 4011  | 840.92  | -8.39688 | 2 F.FM+15.9 Splice@chr  | 1.57E-10 | 0.003998 |
| 12Oct2011 | 1996  | 604.31  | 24.98924 | 2 K.ERDRYSP chr5@7314   | 1.87E-10 | 0.00452  |
| 12Oct2011 | 2303  | 752.88  | -14.2545 | 2 R.GKCNGG chr4@5126    | 1.17E-10 | 0.002853 |
| 12Oct2011 | 1969  | 706.4   | -6.92208 | 2 K.LK+14.01 chr1@1334  | 1.45E-10 | 0.003724 |
| 12Oct2011 | 6241  | 762.4   | 0.669255 | 3 _FYSM+15 chrX@9985    | 9.60E-11 | 0.002393 |
| 12Oct2011 | 3800  | 724.9   | -9.19028 | 2 R.LTFTLTRF chr3@8571  | 2.99E-10 | 0.00915  |
| 12Oct2011 | 2423  | 559.79  | 11.35993 | 2 R.DGWSIG chr4@4253    | 3.53E-10 | 0.009871 |
| 12Oct2011 | 3694  | 897.42  | -27.6753 | 3 _QVREMH Splice@chr    | 8.21E-11 | 0.002393 |
| 12Oct2011 | 5362  | 1040.53 | -29.1053 | 2 V.IFSKINKN chr5@1728  | 3.78E-10 | 0.009871 |
| 12Oct2011 | 74    | 722.35  | 3.723    | 1 R.FQGGGEI chr1@2595   | 3.33E-10 | 0.009871 |
| 12Oct2011 | 7388  | 1003.19 | 17.13413 | 3 R.CWNRRA Splice@chr   | 3.40E-10 | 0.009871 |
| 12Oct2011 | 3561  | 926.48  | -6.79283 | 2 R.RVMIITK Splice@chr  | 6.49E-11 | 0.001505 |
| 12Oct2011 | 3647  | 1345.63 | -24.7692 | 2 _QVREMH Splice@chr    | 2.73E-10 | 0.00915  |
| 12Oct2011 | 5607  | 1049.52 | 5.532542 | 3 G.DQSVDS chr4@9163    | 9.66E-11 | 0.002393 |
| 12Oct2011 | 2297  | 559.79  | 11.35993 | 2 R.DGWSIG chr4@4253    | 2.26E-10 | 0.007651 |
| 12Oct2011 | 840   | 947.5   | 21.47418 | 1 R.DLTNDITI Splice@chr | 6.87E-11 | 0.004009 |

|            |       |         |          |                         |          |          |
|------------|-------|---------|----------|-------------------------|----------|----------|
| 12Oct2011  | 3842  | 1345.63 | -24.7692 | 2 _QVREMH Splice@chr    | 4.58E-11 | 0.001745 |
| 12Oct2011  | 5605  | 1049.53 | 15.08228 | 3 G.DQSVDS chr4@916     | 1.56E-10 | 0.008126 |
| 12Oct2011  | 3817  | 1345.13 | -23.5213 | 2 _QVREMH Splice@chr    | 6.14E-11 | 0.003452 |
| 12Oct2011  | 739   | 401.74  | 27.30093 | 2 R.IEAGGGG chr5@877    | 1.13E-10 | 0.007143 |
| 13July2011 | 6910  | 724.35  | 19.12636 | 3 V.CLTEEGK Splice@chr  | 8.59E-12 | 0        |
| 13July2011 | 12281 | 664.7   | 1.197202 | 3 _PTLNK+1 chr1@652     | 3.28E-12 | 0        |
| 13July2011 | 1784  | 632.33  | 21.173   | 2 _KENEVEK Splice@chr   | 4.90E-10 | 0.008756 |
| 13July2011 | 12073 | 685.88  | 4.188613 | 2 K.IVPGGGA chrX@157    | 1.00E-18 | 0        |
| 13July2011 | 17520 | 1074.07 | 18.6568  | 2 K.YFKINILEI chr2@118  | 1.20E-10 | 0.002162 |
| 13July2011 | 1157  | 562.31  | -13.4391 | 2 R.FYLLLYLK Splice@chr | 6.43E-11 | 0.001327 |
| 13July2011 | 2195  | 735.33  | -27.5112 | 2 K.YGHANVI chr1@106    | 5.67E-10 | 0.009919 |
| 13July2011 | 12427 | 858.48  | 6.006088 | 3 _LETGIKPI Splice@chr  | 3.46E-10 | 0.006612 |
| 13July2011 | 2137  | 735.33  | -27.5112 | 2 K.YGHANVI chr1@106    | 1.43E-10 | 0.002643 |
| 13July2011 | 12702 | 894.5   | -14.1127 | 2 _VETGIKPI Splice@chr  | 2.50E-12 | 0        |
| 13July2011 | 2031  | 412.23  | 25.3069  | 2 R.IASYQGG chrX@167    | 6.25E-11 | 0.00121  |
| 13July2011 | 2719  | 411.55  | -26.8589 | 3 K.ALQM+1 chr3@112     | 5.07E-10 | 0.008844 |
| 13July2011 | 17598 | 795.66  | -10.8901 | 4 K.SGTIFDNI Splice@chr | 5.50E-10 | 0.009592 |
| 13July2011 | 6854  | 724.35  | 19.12636 | 3 V.CLTEEGK Splice@chr  | 4.67E-11 | 0.001102 |
| 13July2011 | 15599 | 849.91  | -5.21446 | 2 Q.DSSYFVE Splice@chr  | 2.70E-10 | 0.004686 |
| 13July2011 | 15264 | 902.79  | -26.6077 | 3 K.RKLEYTIS Splice@chr | 2.51E-10 | 0.004342 |
| 13July2011 | 12128 | 685.88  | 4.188613 | 2 K.IVPGGGA chrX@157    | 4.09E-17 | 0        |
| 13July2011 | 12336 | 664.7   | 1.197202 | 3 _PTLNK+1 chr1@652     | 9.81E-13 | 0        |
| 13July2011 | 11945 | 1134.06 | -5.36126 | 2 _IPSAVGY Splice@chr   | 2.36E-15 | 0        |
| 13July2011 | 17027 | 730.93  | -11.0855 | 2 _FFHKVK+ chr5@200     | 2.30E-10 | 0.004135 |
| 13July2011 | 9289  | 673.32  | -23.1345 | 4 _QVREMH Splice@chr    | 3.55E-11 | 8.41E-04 |
| 13July2011 | 3286  | 527.29  | 11.90088 | 2 K.KLDLNM chr2@718     | 2.19E-11 | 4.40E-04 |
| 13July2011 | 5728  | 696.83  | -11.9803 | 2 R.TDRTESV chr1@145    | 3.96E-10 | 0.007375 |
| 13July2011 | 8996  | 472.29  | -0.64754 | 2 _SPLFVPKI chrX@440    | 1.30E-10 | 0.003985 |
| 13July2011 | 5438  | 696.37  | -15.3603 | 2 _LPTSPIGI chr5@120    | 3.19E-10 | 0.00845  |
| 13July2011 | 9088  | 897.43  | -16.505  | 3 _QVREMH Splice@chr    | 2.20E-10 | 0.005424 |
| 13July2011 | 12391 | 894.51  | -2.9036  | 2 _VETGIKPI Splice@chr  | 1.81E-12 | 0        |
| 13July2011 | 6902  | 724.35  | 19.12636 | 3 V.CLTEEGK Splice@chr  | 6.97E-13 | 0        |
| 13July2011 | 17251 | 795.66  | -10.8901 | 4 K.SGTIFDNI Splice@chr | 1.08E-10 | 0.003891 |
| 13July2011 | 11997 | 664.7   | 1.197202 | 3 _PTLNK+1 chr1@652     | 8.29E-12 | 6.86E-04 |
| 13July2011 | 8883  | 472.29  | -0.64754 | 2 _SPLFVPKI chrX@440    | 1.30E-10 | 0.003985 |
| 13July2011 | 17071 | 1074.08 | 27.9852  | 2 K.YFKINILEI chr2@118  | 6.14E-11 | 0.002497 |
| 13July2011 | 12095 | 858.48  | 6.006088 | 3 _LETGIKPI Splice@chr  | 5.23E-11 | 0.002233 |
| 13July2011 | 15197 | 849.92  | 6.583873 | 2 Q.DSSYFVE Splice@chr  | 6.83E-11 | 0.002856 |
| 13July2011 | 3512  | 527.29  | 11.90088 | 2 K.KLDLNM chr2@718     | 2.26E-11 | 0.001256 |
| 13July2011 | 1370  | 562.31  | -13.4391 | 2 R.FYLLLYLK Splice@chr | 5.07E-11 | 0.002085 |
| 13July2011 | 12339 | 664.7   | 1.197202 | 3 _PTLNK+1 chr1@652     | 1.84E-10 | 0.00483  |
| 13July2011 | 15557 | 1003.2  | 27.12227 | 3 R.CWNRRA Splice@chr   | 9.06E-13 | 0        |
| 13July2011 | 11880 | 685.88  | 4.188613 | 2 K.IVPGGGA chrX@157    | 2.07E-17 | 0        |
| 13July2011 | 2020  | 412.23  | 25.3069  | 2 R.IASYQGG chrX@167    | 3.03E-11 | 0.001059 |
| 13July2011 | 11565 | 756.37  | -13.3372 | 3 _IPSAVGY Splice@chr   | 1.27E-11 | 3.28E-04 |
| 13July2011 | 3393  | 527.29  | 11.90088 | 2 K.KLDLNM chr2@718     | 4.38E-11 | 0.001147 |
| 13July2011 | 12030 | 858.48  | 6.006088 | 3 _LETGIKPI Splice@chr  | 2.60E-10 | 0.004534 |

|            |       |         |          |                         |          |          |
|------------|-------|---------|----------|-------------------------|----------|----------|
| 13July2011 | 4529  | 693.87  | -6.6949  | 2 V.ICVAVGD chr5@1063   | 5.59E-11 | 0.001147 |
| 13July2011 | 11766 | 685.88  | 4.188613 | 2 K.IVPGGGA chrX@1570   | 4.15E-17 | 0        |
| 13July2011 | 16764 | 792.15  | -18.5783 | 4 K.SGTIFDNI Splice@chr | 7.30E-13 | 0        |
| 13July2011 | 11989 | 664.7   | 1.197202 | 3 _PTLNK+1 chr1@6526    | 3.31E-10 | 0.005598 |
| 13July2011 | 6090  | 639.29  | 11.25892 | 3 R.AYSFMSS chrX@4976   | 7.98E-12 | 3.28E-04 |
| 13July2011 | 15030 | 849.42  | 8.560987 | 2 Q.DSSYFVE Splice@chr  | 2.99E-11 | 0.001059 |
| 13July2011 | 11623 | 756.37  | -13.3372 | 3 _IPSAVGY Splice@chr   | 5.20E-11 | 0.001147 |
| 13July2011 | 11583 | 1134.06 | -5.36126 | 2 _IPSAVGY Splice@chr   | 8.38E-17 | 0        |
| 13July2011 | 11514 | 756.37  | -13.3372 | 3 _IPSAVGY Splice@chr   | 5.54E-10 | 0.009215 |
| 13July2011 | 12646 | 762.4   | -28.9646 | 3 _AQYK+14 chr1@1338    | 3.65E-10 | 0.005686 |
| 13July2011 | 6883  | 599.62  | 1.63138  | 3 R.NAEAAAT Splice@chr  | 4.55E-12 | 1.79E-04 |
| 13July2011 | 1215  | 616.8   | 4.063792 | 2 R.SGGGGG chr5@1954    | 4.04E-10 | 0.006642 |
| 13July2011 | 1182  | 562.31  | -13.4391 | 2 R.FYLLLYLK Splice@chr | 5.91E-11 | 0.001147 |
| 13July2011 | 11711 | 685.88  | 4.188613 | 2 K.IVPGGGA chrX@1570   | 5.43E-13 | 0        |
| 13July2011 | 6820  | 599.62  | 1.63138  | 3 R.NAEAAAT Splice@chr  | 1.59E-14 | 0        |
| 13July2011 | 11531 | 1134.06 | -5.36126 | 2 _IPSAVGY Splice@chr   | 7.98E-18 | 0        |
| 13July2011 | 3337  | 527.29  | 11.90088 | 2 K.KLDLNM chr2@7182    | 2.19E-11 | 9.30E-04 |
| 13July2011 | 3455  | 527.29  | 11.90088 | 2 K.KLDLNM chr2@7182    | 2.19E-11 | 9.30E-04 |
| 13July2011 | 12361 | 894     | -12.2343 | 2 _VETGIKP Splice@chr   | 2.83E-13 | 0        |
| 13July2011 | 12311 | 894     | -12.2343 | 2 _VETGIKP Splice@chr   | 4.50E-11 | 0.001147 |
| 13July2011 | 6765  | 599.62  | 1.63138  | 3 R.NAEAAAT Splice@chr  | 3.71E-10 | 0.00581  |
| 13July2011 | 3635  | 527.29  | 11.90088 | 2 K.KLDLNM chr2@7182    | 2.26E-11 | 0.001005 |
| 13July2011 | 6942  | 599.62  | 1.63138  | 3 R.NAEAAAT Splice@chr  | 8.32E-13 | 0        |
| 13July2011 | 14166 | 849.42  | 8.560987 | 2 Q.DSSYFVE Splice@chr  | 3.06E-10 | 0.008523 |
| 13July2011 | 11925 | 858.48  | 6.006088 | 3 _LETGIKP Splice@chr   | 1.12E-12 | 2.08E-04 |
| 13July2011 | 11886 | 664.7   | 1.197202 | 3 _PTLNK+1 chr1@6526    | 1.41E-10 | 0.004451 |
| 13July2011 | 15052 | 849.42  | 8.560987 | 2 Q.DSSYFVE Splice@chr  | 3.58E-10 | 0.009356 |
| 13July2011 | 11979 | 858.48  | 6.006088 | 3 _LETGIKP Splice@chr   | 1.77E-12 | 2.08E-04 |
| 13July2011 | 11749 | 685.88  | 4.188613 | 2 K.IVPGGGA chrX@1570   | 1.88E-17 | 0        |
| 13July2011 | 12268 | 894     | -12.2343 | 2 _VETGIKP Splice@chr   | 1.96E-12 | 2.08E-04 |
| 13July2011 | 12224 | 894.5   | -14.1127 | 2 _VETGIKP Splice@chr   | 2.85E-11 | 0.001153 |
| 13July2011 | 11550 | 1134.06 | -5.36126 | 2 _IPSAVGY Splice@chr   | 1.79E-16 | 0        |
| 13July2011 | 6999  | 599.62  | 1.63138  | 3 R.NAEAAAT Splice@chr  | 3.09E-11 | 0.001312 |
| 13July2011 | 16132 | 787.89  | 24.95531 | 2 K.FWREIQM chrX@1650   | 3.45E-10 | 0.009242 |
| 13July2011 | 3745  | 526.79  | 15.09121 | 2 K.KLDLNM chr2@7182    | 2.19E-11 | 0.001005 |
| 13July2011 | 6232  | 639.29  | 11.25892 | 3 R.AYSFMSS chrX@4976   | 1.98E-14 | 0        |
| 13July2011 | 8891  | 897.42  | -27.6753 | 3 _QVREMH Splice@chr    | 1.37E-10 | 0.004171 |
| 13July2011 | 3687  | 526.79  | 15.09121 | 2 K.KLDLNM chr2@7182    | 2.19E-11 | 0.001005 |
| 13July2011 | 11498 | 1134.06 | -5.36126 | 2 _IPSAVGY Splice@chr   | 2.53E-16 | 0        |
| 13July2011 | 11693 | 685.88  | 4.188613 | 2 K.IVPGGGA chrX@1570   | 1.82E-15 | 0        |
| 13July2011 | 6285  | 639.29  | 11.25892 | 3 R.AYSFMSS chrX@4976   | 1.23E-12 | 2.08E-04 |
| 13July2011 | 8286  | 839.46  | -17.5889 | 2 K.PKPRHRS chr3@2675   | 3.76E-10 | 0.009737 |
| 13July2011 | 2775  | 471.28  | 10.90222 | 2 R.KDEPVVV Splice@chr  | 1.70E-10 | 0.004803 |
| 13July2011 | 1309  | 562.31  | -13.4391 | 2 R.FYLLLYLK Splice@chr | 5.23E-11 | 0.001705 |
| 13July2011 | 3983  | 693.87  | -6.6949  | 2 V.ICVAVGD chr5@1063   | 1.37E-10 | 0.00506  |
| 13July2011 | 13736 | 849.42  | 8.560987 | 2 Q.DSSYFVE Splice@chr  | 2.93E-10 | 0.007999 |
| 13July2011 | 11631 | 754.94  | 28.09244 | 2 K.RRKINSSI chr5@8964  | 2.09E-10 | 0.005999 |

|            |       |         |          |                          |          |          |
|------------|-------|---------|----------|--------------------------|----------|----------|
| 13July2011 | 5291  | 403.46  | -23.4306 | 4 R.K+14.016 Splice@chr  | 5.92E-11 | 0.002406 |
| 13July2011 | 10982 | 858.48  | 6.006088 | 3 _..LETGIIPi Splice@chr | 8.44E-12 | 1.97E-04 |
| 13July2011 | 1056  | 562.31  | -13.4391 | 2 R.FYLLYLYK Splice@chr  | 5.21E-11 | 0.002153 |
| 13July2011 | 11291 | 894.5   | -14.1127 | 2 _..VETGIIP Splice@chr  | 5.64E-12 | 1.97E-04 |
| 13July2011 | 1743  | 412.23  | 25.3069  | 2 R.IASYQGG chrX@1679    | 3.03E-11 | 5.62E-04 |
| 13July2011 | 10752 | 685.88  | 4.188613 | 2 K.IVPGGGA chrX@1570    | 1.00E-18 | 0        |
| 13July2011 | 11242 | 894.5   | -14.1127 | 2 _..VETGIIP Splice@chr  | 1.27E-13 | 0        |
| 13July2011 | 10672 | 664.37  | 7.851479 | 3 _..PTLNK+1. chr1@6526  | 1.77E-11 | 1.97E-04 |
| 13July2011 | 10525 | 1134.06 | -5.36126 | 2 _..IPSAVGYi Splice@chr | 3.81E-16 | 0        |
| 13July2011 | 11346 | 894     | -12.2343 | 2 _..VETGIIP Splice@chr  | 6.20E-12 | 1.97E-04 |
| 13July2011 | 1881  | 735.33  | -27.5112 | 2 K.YGHANVI chr1@1065    | 1.95E-10 | 0.005723 |
| 13July2011 | 10509 | 756.37  | -13.3372 | 3 _..IPSAVGYi Splice@chr | 1.90E-10 | 0.005723 |
| 13July2011 | 11036 | 858.48  | 6.006088 | 3 _..LETGIIPi Splice@chr | 2.76E-13 | 0        |
| 13July2011 | 8286  | 673.32  | -23.1345 | 4 _..QVREMH Splice@chr   | 3.37E-10 | 0.008931 |
| 13July2011 | 11516 | 858.48  | 6.006088 | 3 _..LETGIIPi Splice@chr | 2.61E-11 | 0.001388 |
| 13July2011 | 5052  | 558.3   | -2.40945 | 2 R.LEIDSSNI Splice@chr  | 2.12E-11 | 0.001217 |
| 13July2011 | 11569 | 858.48  | 6.006088 | 3 _..LETGIIPi Splice@chr | 2.69E-14 | 0        |
| 13July2011 | 11798 | 894.5   | -14.1127 | 2 _..VETGIIP Splice@chr  | 3.01E-12 | 2.45E-04 |
| 13July2011 | 9667  | 671.37  | -24.0361 | 2 T.FNIVHTQ Splice@chr   | 2.24E-10 | 0.007857 |
| 13July2011 | 1271  | 562.31  | -13.4391 | 2 R.FYLLYLYK Splice@chr  | 6.26E-11 | 0.002903 |
| 13July2011 | 14347 | 849.42  | 8.560987 | 2 Q.DSSYFVE Splice@chr   | 1.16E-11 | 6.65E-04 |
| 13July2011 | 2763  | 439.23  | -12.3957 | 2 R.IDDKTSAi chr5@8738   | 1.19E-10 | 0.005566 |
| 13July2011 | 11332 | 685.88  | 4.188613 | 2 K.IVPGGGA chrX@1570    | 7.84E-15 | 0        |
| 13July2011 | 14391 | 849.42  | 8.560987 | 2 Q.DSSYFVE Splice@chr   | 2.22E-10 | 0.007704 |
| 13July2011 | 11747 | 894.5   | -14.1127 | 2 _..VETGIIP Splice@chr  | 2.44E-12 | 0        |
| 13July2011 | 11276 | 685.88  | 4.188613 | 2 K.IVPGGGA chrX@1570    | 1.56E-16 | 0        |
| 13July2011 | 11123 | 1134.06 | -5.36126 | 2 _..IPSAVGYi Splice@chr | 1.33E-14 | 0        |
| 13July2011 | 2232  | 584.31  | 9.626723 | 2 R.FSLKNTEi chr4@2692   | 1.28E-10 | 0.006402 |
| 13July2011 | 7122  | 509.8   | -23.773  | 2 R.SSVIMLIV chr2@5767   | 3.76E-11 | 0.001724 |
| 13July2011 | 12279 | 515.29  | -6.17134 | 3 K.PNFTVILS chr4@1642   | 3.50E-10 | 0.008442 |
| 13July2011 | 317   | 522.8   | -6.43343 | 2 K.M+15.99 chr4@1097    | 4.10E-10 | 0.00944  |
| 13July2011 | 16756 | 792.16  | -5.99938 | 4 K.SGTIFDNI Splice@chr  | 2.00E-15 | 0        |
| 13July2011 | 12317 | 668.89  | -3.92959 | 2 D.KDVQHM Splice@chr    | 3.48E-10 | 0.005686 |
| 12Oct2011  | 10816 | 1128.6  | -28.1307 | 2 R.CK+14.01 chr2@1237   | 1.64E-10 | 0.005259 |
| 12Oct2011  | 5274  | 798.66  | -23.2486 | 4 R.IPFIPPSI Splice@chr  | 5.39E-11 | 6.17E-04 |
| 12Oct2011  | 633   | 458.74  | 21.06856 | 2 K.YIPHGDSi chrX@1495   | 6.02E-10 | 0.009812 |
| 13July2011 | 13652 | 770.08  | 12.59227 | 3 _..FKRSYSFY chrX@1466  | 2.78E-10 | 0.006856 |
| 12Oct2011  | 10898 | 989.02  | -21.4357 | 2 K.QK+14.01 chr4@4861   | 4.40E-10 | 0.006301 |
| 12Oct2011  | 1612  | 1046.55 | -9.80717 | 1 K.MRTCLPL chr5@4855    | 2.19E-10 | 0.004389 |
| 13July2011 | 1529  | 586.3   | -29.2734 | 2 K.NQTGGKi chr1@7775    | 2.91E-10 | 0.007359 |
| 13July2011 | 7945  | 589.81  | -4.30371 | 2 R.TCEIVLISI chr2@8730  | 1.88E-10 | 0.005723 |
| 12Oct2011  | 6217  | 578.29  | -1.16245 | 3 K.YAK+14.0 chr3@6747   | 3.80E-10 | 0.008527 |
| 13July2011 | 2402  | 447.23  | -16.2768 | 2 K.LNFVMNI chr4@8726    | 4.30E-10 | 0.007243 |
| 13July2011 | 13765 | 991.04  | -8.04821 | 2 S.K+14.016 chr5@5228   | 3.33E-10 | 0.009242 |
| 12Oct2011  | 9727  | 839.95  | -14.5503 | 4 _..KHLEDIRi chrX@8405  | 1.54E-10 | 0.005393 |
| 13July2011 | 7493  | 472.28  | 13.08083 | 2 _..KNICAIPK Splice@chr | 1.75E-10 | 0.00347  |
| 13July2011 | 13724 | 934.16  | 0.08721  | 3 K.LNILLDAF chr1@2327   | 5.93E-11 | 0.00121  |

|            |       |         |          |                         |          |          |
|------------|-------|---------|----------|-------------------------|----------|----------|
| 13July2011 | 13575 | 934.16  | 0.08721  | 3 K.LNILLDAF chr1@2327  | 2.27E-10 | 0.00554  |
| 13July2011 | 13392 | 934.16  | 0.08721  | 3 K.LNILLDAF chr1@2327  | 2.26E-10 | 0.003663 |
| 12Oct2011  | 2410  | 568.81  | 19.42204 | 2 R.RMCTWII chr4@2935   | 2.19E-10 | 0.00959  |
| 13July2011 | 564   | 586.3   | -20.8197 | 2 K.NHRNQN chr2@3880    | 2.69E-10 | 0.004686 |
| 12Oct2011  | 6008  | 751.46  | 4.925282 | 2 F.KFLRINNI chr3@1852  | 4.22E-10 | 0.009653 |
| 12Oct2011  | 6005  | 751.46  | 4.925282 | 2 F.KFLRINNI chr3@1852  | 7.06E-10 | 0.009424 |
| 13July2011 | 10540 | 566.3   | -15.7356 | 3 R.SENGKLN chr4@2612   | 3.56E-10 | 0.006723 |
| 13July2011 | 2852  | 608.98  | 23.49213 | 3 R.TRRTPGS Splice@chr  | 2.99E-10 | 0.00814  |
| 12Oct2011  | 6687  | 692.39  | -12.0059 | 2 R.TISEIQK+ chrX@9341  | 2.55E-10 | 0.007315 |
| 13July2011 | 12026 | 669.38  | 19.69605 | 2 _ELKNQNF chr4@1277    | 4.74E-10 | 0.008438 |
| 13July2011 | 5025  | 575.28  | -11.3721 | 2 K.SPDSGDF chr2@1219   | 6.19E-12 | 3.28E-04 |
| 12Oct2011  | 6091  | 843.45  | -25.7192 | 2 K.IFM+15.9 chr2@1157  | 3.48E-10 | 0.009009 |
| 13July2011 | 3762  | 895.75  | 16.03766 | 3 R.SEFELISK Splice@chr | 3.46E-10 | 0.006612 |
| 12Oct2011  | 2131  | 601.41  | 7.014391 | 2 K.FLKLSKIKI chrX@1614 | 2.77E-10 | 0.006307 |
| 12Oct2011  | 3544  | 489.93  | 7.157323 | 3 K.NLICFMIK chr4@1600  | 3.88E-10 | 0.007987 |
| 12Oct2011  | 7439  | 1106.56 | -20.8681 | 2 R.ILYKM+1 Splice@chr  | 2.59E-10 | 0.00755  |
| 12Oct2011  | 7778  | 883.5   | -19.7109 | 2 K.KIHKFPIF chr4@1547  | 2.92E-10 | 0.007405 |
| 13July2011 | 10814 | 677.03  | -4.39389 | 3 R.HRTVDSC Splice@chr  | 1.13E-10 | 0.004302 |
| 13July2011 | 6476  | 647.6   | 7.673471 | 4 L.K+14.016 chr3@6111  | 9.55E-11 | 0.002659 |
| 12Oct2011  | 2773  | 802.45  | 1.751606 | 2 M.RSALGSF Splice@chr  | 3.46E-10 | 0.005622 |
| 12Oct2011  | 11024 | 794.4   | -26.4938 | 1 K.RVMMTR chr3@4693    | 3.94E-10 | 0.007975 |
| 12Oct2011  | 9897  | 1074.06 | -8.50646 | 2 K.FFRQNEL chr5@1682   | 1.19E-11 | 3.18E-04 |
| 13July2011 | 5478  | 585.83  | -9.70588 | 2 A.WVPARE chr2@1467    | 2.25E-10 | 0.00554  |
| 12Oct2011  | 8483  | 1027.64 | 20.73057 | 2 M.RMNELP chr4@4034    | 3.29E-11 | 5.59E-04 |
| 12Oct2011  | 3807  | 857.92  | -27.8284 | 2 R.RYQRCRF Splice@chr  | 1.79E-10 | 0.005886 |
| 13July2011 | 14978 | 741.9   | -11.0037 | 2 R.RMKIFEN chr5@1768   | 1.11E-11 | 1.53E-04 |
| 12Oct2011  | 11247 | 936.02  | 2.842247 | 2 R.LSIVLLFM chr3@1157  | 6.25E-10 | 0.007708 |
| 12Oct2011  | 11226 | 936.02  | 2.842247 | 2 R.LSIVLLFM chr3@1157  | 2.85E-10 | 0.005054 |
| 12Oct2011  | 11004 | 936.02  | 2.842247 | 2 R.LSIVLLFM chr3@1157  | 3.36E-10 | 0.009205 |
| 12Oct2011  | 6776  | 654.41  | -26.6871 | 2 _LKK+14.0 Splice@chr  | 4.32E-11 | 0.001812 |
| 13July2011 | 4644  | 442.26  | -15.8607 | 3 R.ILSVPRLF Splice@chr | 2.63E-10 | 0.009028 |
| 12Oct2011  | 1667  | 451.26  | 6.416439 | 3 K.K+14.016 chr4@1604  | 8.93E-11 | 8.91E-04 |
| 12Oct2011  | 4195  | 591.82  | -17.0454 | 2 K.FFELKND chr2@1427   | 1.10E-10 | 0.002836 |
| 13July2011 | 12237 | 506.28  | -27.2211 | 4 _ANKIMK+ Splice@chr   | 3.99E-10 | 0.009236 |
| 12Oct2011  | 3357  | 603.83  | -6.0749  | 2 R.QEPPTTH Splice@chr  | 1.00E-10 | 0.001388 |
| 13July2011 | 12698 | 756.4   | 15.44069 | 3 K.LETRVEE chr5@1703   | 1.18E-11 | 0.001019 |
| 12Oct2011  | 9313  | 633.9   | 28.90877 | 2 R.KLRHYLFI chr4@1251  | 2.73E-10 | 0.006879 |
| 12Oct2011  | 3183  | 1254.62 | -23.1747 | 1 K.MVWFLK chr3@5852    | 2.93E-10 | 0.008273 |
| 12Oct2011  | 13551 | 914.5   | 8.324307 | 2 K.LTRLLFIN chr2@8907  | 2.45E-10 | 0.004786 |
| 12Oct2011  | 11035 | 792.37  | -2.62292 | 1 K.TEEAWR. chrX@6621   | 3.41E-10 | 0.008014 |
| 12Oct2011  | 5263  | 771.49  | -0.59312 | 2 K.RKKK+14 chrX@1534   | 2.97E-10 | 0.007559 |
| 12Oct2011  | 22    | 503.27  | -2.06584 | 2 R.SRRAWS Splice@chr   | 4.58E-10 | 0.007864 |
| 12Oct2011  | 5391  | 581.98  | -21.9914 | 3 K.KIHKLPKI chr5@3766  | 1.95E-10 | 0.005976 |
| 12Oct2011  | 2544  | 717.86  | -24.2381 | 2 K.GRPLDFE Splice@chr  | 6.55E-11 | 0.001753 |
| 12Oct2011  | 224   | 652.35  | -15.4614 | 2 K.K+14.016 chr5@7782  | 5.11E-11 | 0.001064 |
| 13July2011 | 4297  | 499.28  | 22.25765 | 2 R.PPQQNV Splice@chr   | 4.21E-10 | 0.00944  |
| 12Oct2011  | 3901  | 602.32  | -28.6908 | 3 W.GKVYVY chrX@6217    | 2.03E-10 | 0.006842 |

|            |       |         |          |                         |          |          |
|------------|-------|---------|----------|-------------------------|----------|----------|
| 12Oct2011  | 6154  | 846.09  | -29.6459 | 3 V.VCVSFSIF chr5@1177  | 3.92E-10 | 0.008691 |
| 12Oct2011  | 9683  | 685.35  | -15.9299 | 2 R.FFRSFAF chr4@1375   | 1.36E-10 | 0.00305  |
| 13July2011 | 11654 | 911.95  | -27.7382 | 2 Q.FLK+14.C chr5@7120  | 2.37E-10 | 0.008472 |
| 13July2011 | 10925 | 588.85  | -21.9075 | 2 S.FLGVLK+ chr4@1185   | 1.60E-10 | 0.005337 |
| 12Oct2011  | 5216  | 1271.1  | -27.3769 | 2 F.NHYGKLC Splice@chr  | 2.17E-10 | 0.005922 |
| 13July2011 | 3590  | 583.64  | -27.1664 | 3 K.SPSRRNC Splice@chr  | 2.07E-11 | 0.001005 |
| 12Oct2011  | 13221 | 1103.53 | -26.7933 | 3 K.LPNFFQL chr5@2580   | 3.85E-10 | 0.009212 |
| 13July2011 | 13032 | 849.43  | 17.00957 | 3 K.M+15.99 chr5@9896   | 2.33E-10 | 0.005798 |
| 12Oct2011  | 3132  | 499.02  | -21.2633 | 4 _K+14.016 chr2@9901   | 8.86E-11 | 0.002322 |
| 13July2011 | 7940  | 549.27  | -27.2575 | 4 _GSGACLI chr2@9490    | 3.30E-10 | 0.006043 |
| 12Oct2011  | 3070  | 642.41  | 18.81063 | 2 K.KEEAVAK chrX@8358   | 2.94E-10 | 0.007401 |
| 12Oct2011  | 2265  | 471.28  | -1.03829 | 2 R.RSEPVVV chr5@5671   | 5.63E-10 | 0.007319 |
| 12Oct2011  | 2231  | 471.28  | -1.03829 | 2 R.RSEPVVV chr5@5671   | 2.50E-10 | 0.00672  |
| 12Oct2011  | 1905  | 471.28  | -1.03829 | 2 R.RSEPVVV chr5@5671   | 2.47E-10 | 0.006115 |
| 13July2011 | 7780  | 470.6   | 16.63705 | 3 K.KIKGKM+ chr4@7602   | 4.58E-11 | 0.001102 |
| 12Oct2011  | 5930  | 1117.57 | -5.24767 | 2 K.KK+14.01 chrX@7718  | 2.81E-10 | 0.005533 |
| 12Oct2011  | 7874  | 671.43  | -25.2802 | 2 R.RK+14.01 chrX@9251  | 3.52E-10 | 0.008197 |
| 12Oct2011  | 6700  | 1020.15 | -11.6782 | 2 R.RFLIK+14 chr4@1459  | 3.36E-10 | 0.009148 |
| 12Oct2011  | 4606  | 857.92  | 19.84995 | 2 R.SNYVDM chr4@6948    | 1.66E-10 | 0.003215 |
| 12Oct2011  | 5768  | 547.34  | 4.307081 | 2 K.KLSFSAK Splice@chr  | 2.68E-10 | 0.005648 |
| 13July2011 | 2728  | 415.74  | -10.596  | 2 K.IDMKPVK chr5@1691   | 2.00E-10 | 0.007578 |
| 12Oct2011  | 2013  | 521.29  | -21.4676 | 2 K.ITNLLQDI chr2@1429  | 3.69E-10 | 0.008137 |
| 12Oct2011  | 11474 | 896.47  | 0.921882 | 2 _PYPPTDP chr2@1365    | 5.07E-12 | 0        |
| 12Oct2011  | 10935 | 667.7   | 4.611385 | 3 R.KTGSK+1 chr2@8830   | 1.15E-10 | 0.003513 |
| 13July2011 | 17510 | 840.91  | -16.5683 | 2 R.RNRMRH chrX@3327    | 2.52E-11 | 0.001256 |
| 13July2011 | 16271 | 736.71  | 3.650331 | 3 R.YPVKVCV chr3@1031   | 7.19E-11 | 0.002856 |
| 12Oct2011  | 1488  | 674.35  | 24.92802 | 2 K.YYSQDVC chr5@2170   | 1.60E-10 | 0.003793 |
| 12Oct2011  | 4555  | 571.88  | -0.58667 | 2 K.KIMIAVV chr5@5637   | 2.96E-10 | 0.008419 |
| 12Oct2011  | 6445  | 933.59  | 12.14834 | 2 R.HRLRLSFI chr3@1247  | 4.68E-10 | 0.008092 |
| 12Oct2011  | 4599  | 474.25  | -24.5041 | 4 _QNAEEVI chr4@1228    | 4.29E-10 | 0.009924 |
| 13July2011 | 4160  | 415.24  | 22.17102 | 3 K.VLNTTFK chrX@9056   | 1.00E-10 | 0.001519 |
| 13July2011 | 7297  | 571.87  | 5.345903 | 2 R.K+14.016 Splice@chr | 3.28E-10 | 0.008833 |
| 12Oct2011  | 7250  | 675.72  | 4.402456 | 3 _KNPITAIT Splice@chr  | 9.64E-11 | 0.002393 |
| 12Oct2011  | 5594  | 857.94  | -7.23229 | 2 V.LLSLKYEY chr2@9837  | 9.17E-11 | 0.002321 |
| 12Oct2011  | 5697  | 857.94  | -7.23229 | 2 V.LLSLKYEY chr2@9837  | 8.32E-11 | 0.002363 |
| 12Oct2011  | 5924  | 857.94  | -7.23229 | 2 V.LLSLKYEY chr2@9837  | 8.17E-11 | 0.001222 |
| 12Oct2011  | 4600  | 857.44  | -5.27371 | 2 V.LLSLKYEY chr2@9837  | 2.17E-11 | 6.12E-04 |
| 13July2011 | 4509  | 511.77  | 22.46617 | 2 R.ISVTCTW chr3@7572   | 3.85E-10 | 0.00985  |
| 12Oct2011  | 3691  | 627.31  | 17.63934 | 1 _DPTTPP.F chr4@1029   | 6.15E-10 | 0.007708 |
| 12Oct2011  | 2102  | 474.25  | -28.3486 | 3 K.WMFSGP chr4@6312    | 5.05E-11 | 0.004137 |
| 13July2011 | 4934  | 417.21  | -4.25277 | 2 K.WAKDGE chr5@1945    | 5.40E-11 | 0.002315 |
| 12Oct2011  | 5695  | 944.6   | 6.727163 | 2 R.DQLK+14 chr5@6188   | 3.45E-10 | 0.009325 |
| 12Oct2011  | 6960  | 533.31  | 9.126377 | 2 _IIFSTENLI chr1@5609  | 4.76E-10 | 0.006492 |
| 12Oct2011  | 7861  | 533.31  | 9.126377 | 2 _IIFSTENLI chr1@5609  | 1.51E-10 | 0.003041 |
| 12Oct2011  | 4618  | 533.31  | 9.126377 | 2 _IIFSTENLI chr1@5609  | 1.05E-10 | 0.006094 |
| 12Oct2011  | 8059  | 1062.91 | -19.2353 | 3 K.ENGRNIN Splice@chr  | 1.35E-12 | 0        |
| 12Oct2011  | 5757  | 761.06  | -17.4524 | 3 _LSQK+14 chr5@1495    | 3.65E-10 | 0.00762  |

|            |       |         |          |                         |          |          |
|------------|-------|---------|----------|-------------------------|----------|----------|
| 13July2011 | 9414  | 763.38  | -1.20089 | 2 _..LGSDNFE chr3@1606  | 5.47E-10 | 0.009215 |
| 13July2011 | 12847 | 601.37  | -7.82806 | 2 R.TK+14.01 Splice@chr | 1.74E-11 | 0.001217 |
| 12Oct2011  | 5892  | 881.96  | 3.394887 | 2 K.EIGQRVC chr3@2620   | 1.36E-11 | 0        |
| 12Oct2011  | 452   | 570.29  | 17.15457 | 2 K.YSSFGYFI chr1@1076  | 3.39E-11 | 0.001493 |
| 12Oct2011  | 8164  | 901.44  | -29.3404 | 4 _..VFGFEK+ chr5@6129  | 6.46E-11 | 8.31E-04 |
| 12Oct2011  | 4854  | 752.11  | 8.049419 | 3 R.VSTLLK+1 chr4@1658  | 6.32E-11 | 0.003679 |
| 13July2011 | 66    | 425.89  | 25.37915 | 3 R.QEEGEEI\ chrX@1706  | 1.99E-10 | 0.005071 |
| 13July2011 | 4252  | 468.78  | 18.7467  | 2 K.ISGKFDIR chrX@1561  | 2.86E-10 | 0.005006 |
| 12Oct2011  | 583   | 580.32  | 0        | 2 K.KNTADTL chr4@1785   | 2.18E-10 | 0.003144 |
| 12Oct2011  | 4008  | 618.98  | 13.60561 | 3 R.TTGLEQN chrX@4418   | 4.49E-10 | 0.009603 |
| 12Oct2011  | 7227  | 678.7   | -13.6651 | 3 R.KMPICRF chr5@8865   | 2.13E-10 | 0.004389 |
| 12Oct2011  | 1788  | 411.55  | -8.0281  | 3 R.WWHAQ Splice@chr    | 3.95E-10 | 0.009563 |
| 12Oct2011  | 1734  | 1105.56 | 19.00905 | 1 _..SWKEREL chr3@9001  | 1.18E-10 | 0.003387 |
| 12Oct2011  | 3115  | 634.84  | -20.5105 | 2 K.RMRSHN Splice@chr   | 7.86E-11 | 0.002095 |
| 13July2011 | 790   | 580.81  | 16.17489 | 2 G.QEVLGY\ Splice@chr  | 2.60E-10 | 0.00889  |
| 12Oct2011  | 3437  | 599.89  | -2.14021 | 2 K.TK+14.01 chr1@3795  | 1.81E-10 | 0.006722 |
| 13July2011 | 12542 | 585.32  | 21.59109 | 2 R.IM+15.95 chr4@4488  | 2.23E-10 | 0.003663 |
| 12Oct2011  | 1081  | 559.8   | 6.116746 | 2 R.RSSPICSR Splice@chr | 2.21E-10 | 0.006331 |
| 13July2011 | 1755  | 434.91  | -11.4009 | 3 _..IGTEFKFF chr3@2530 | 3.08E-10 | 0.0081   |
| 12Oct2011  | 911   | 437.28  | 12.87111 | 2 R.AVSSGLI\ chr1@1339  | 4.76E-11 | 0.001376 |
| 13July2011 | 13084 | 736.36  | -22.2991 | 2 K.QFFTEK+ chr2@4530   | 2.68E-10 | 0.004576 |
| 13July2011 | 12288 | 506.28  | 28.79597 | 4 R.WSREKEI\ chr2@1104  | 1.65E-10 | 0.003903 |
| 12Oct2011  | 5628  | 828.53  | 14.58618 | 3 R.K+14.016 chr3@9330  | 4.29E-11 | 0.0023   |
| 12Oct2011  | 6838  | 1102.89 | -25.7011 | 3 K.WFDPFN chr3@1330    | 9.12E-11 | 0.006094 |
| 12Oct2011  | 11575 | 940.04  | 14.21099 | 2 K.RRSEEPPI chr4@3865  | 3.71E-10 | 0.00719  |
| 12Oct2011  | 5267  | 497.59  | 19.99384 | 3 L.SHTSAMS chr2@1406   | 1.05E-10 | 0.004245 |
| 12Oct2011  | 5364  | 748.4   | 9.473131 | 3 _..K+14.016 chr5@1522 | 7.32E-11 | 0.004205 |
| 12Oct2011  | 6159  | 838.03  | 20.24896 | 2 R.RTLYLRRI chr1@1504  | 2.31E-10 | 0.008011 |
| 13July2011 | 16843 | 984.52  | 23.31644 | 2 R.NWNTLIC chr3@8316   | 5.24E-11 | 0.002363 |
| 12Oct2011  | 1398  | 571.36  | 24.18555 | 2 R.TAAKPGI\ chr4@9844  | 6.82E-11 | 0.003679 |
| 12Oct2011  | 1810  | 845.45  | -10.9862 | 1 K.NATREVF chr1@1125   | 1.39E-10 | 0.002861 |
| 13July2011 | 4628  | 490.28  | 12.59959 | 2 K.ICVAYVVI Splice@chr | 1.95E-11 | 0.001217 |
| 13July2011 | 9031  | 600.56  | -22.277  | 4 R.EMSYHSI chrX@1537   | 1.07E-11 | 1.53E-04 |
| 12Oct2011  | 7235  | 694.6   | -29.4666 | 4 R.QRGEDSI Splice@chr  | 2.63E-11 | 0.001503 |
| 12Oct2011  | 5146  | 674.86  | -22.9761 | 2 R.PQYHHLL chr4@3738   | 2.27E-10 | 0.004929 |
| 13July2011 | 9395  | 679.35  | -27.2747 | 3 K.PEPEPEPI chr2@4277  | 3.37E-10 | 0.009242 |
| 13July2011 | 12936 | 737.36  | 7.484025 | 4 R.NAEEEAA\ Splice@chr | 3.13E-12 | 1.79E-04 |
| 13July2011 | 12855 | 737.36  | 7.484025 | 4 R.NAEEEAA\ Splice@chr | 1.43E-13 | 0        |
| 12Oct2011  | 3582  | 757.39  | -13.4428 | 2 _..RLQHAM Splice@chr  | 3.09E-10 | 0.009782 |
| 13July2011 | 12840 | 693.42  | 7.791316 | 3 R.GFTPM+ chr4@7821    | 2.76E-11 | 8.41E-04 |
| 13July2011 | 12457 | 693.42  | 7.791316 | 3 R.GFTPM+ chr4@7821    | 9.51E-11 | 0.001519 |
| 13July2011 | 1349  | 467.26  | -3.86171 | 2 R.FKGTAGC chr4@3771   | 4.39E-10 | 0.008013 |
| 12Oct2011  | 2057  | 450.21  | -0.23672 | 4 K.M+15.99 chr5@4116   | 3.88E-10 | 0.007987 |
| 12Oct2011  | 6089  | 1050.53 | 27.37687 | 2 K.HYTNPV Splice@chr   | 1.31E-10 | 0.004892 |
| 13July2011 | 1301  | 693.36  | -7.40507 | 2 P.CRAWHT chr1@4780    | 1.27E-10 | 0.004171 |
| 12Oct2011  | 9377  | 1016.56 | -10.9983 | 2 K.K+14.016 chr2@1464  | 4.90E-10 | 0.008796 |
| 12Oct2011  | 4136  | 1094.58 | 4.799911 | 1 R.NVGFFLC Splice@chr  | 6.84E-11 | 0.003583 |

|            |       |         |          |                         |          |          |
|------------|-------|---------|----------|-------------------------|----------|----------|
| 12Oct2011  | 10617 | 985.5   | -2.64518 | 3 R.CVGFFGV chr3@1356   | 2.50E-10 | 0.00755  |
| 12Oct2011  | 632   | 606.31  | 22.48653 | 2 R.RSCSSM+ Splice@chr  | 1.87E-10 | 0.004178 |
| 12Oct2011  | 4292  | 472.76  | 1.362212 | 2 R.FPVPCPV chrX@4542   | 7.93E-11 | 0.002233 |
| 12Oct2011  | 4729  | 1133.95 | -3.93325 | 3 R.NSWKNA chr5@1270    | 1.11E-10 | 0.008979 |
| 13July2011 | 6043  | 545.33  | 9.306924 | 2 K.KLKTFNN chrX@7735   | 2.29E-10 | 0.004135 |
| 12Oct2011  | 4774  | 544.35  | 6.129811 | 2 R.K+14.016 chr5@5982  | 2.84E-10 | 0.006307 |
| 12Oct2011  | 2318  | 779.91  | 22.33324 | 2 R.EM+15.9 chrX@1668   | 1.81E-10 | 0.003369 |
| 13July2011 | 10325 | 710.03  | -7.11619 | 3 K.CSATQK+ Splice@chr  | 1.24E-10 | 0.003022 |
| 12Oct2011  | 14049 | 1113.58 | -25.1502 | 3 _IFRCFFLK chr2@2057   | 1.85E-11 | 1.94E-04 |
| 13July2011 | 16865 | 1103.6  | -16.1424 | 2 R.LFK+14.0 chr2@4315  | 7.85E-11 | 0.001519 |
| 12Oct2011  | 7017  | 738.48  | -18.1247 | 2 R.KKNLAKK chr5@1989   | 4.41E-11 | 0.001639 |
| 12Oct2011  | 9310  | 953.57  | -8.71409 | 1 K.ASTAHLIL chr5@1418  | 3.83E-10 | 0.009658 |
| 13July2011 | 11252 | 660.37  | -16.199  | 2 K.TK+14.01 chr1@1424  | 1.44E-10 | 0.004111 |
| 13July2011 | 11067 | 660.37  | -16.199  | 2 K.TK+14.01 chr1@1424  | 3.33E-10 | 0.009242 |
| 13July2011 | 3658  | 460.23  | -8.10744 | 2 K.VDNSSKN chr5@7822   | 1.29E-10 | 0.004611 |
| 12Oct2011  | 5093  | 654.34  | -29.6009 | 4 K.NVLSLSG chr5@8245   | 2.56E-10 | 0.007328 |
| 13July2011 | 9292  | 547.96  | -16.9616 | 3 R.GITEKNIE chr2@1050  | 3.51E-10 | 0.005686 |
| 13July2011 | 14373 | 538.29  | -26.3317 | 3 K.YVVSLFLI chr5@2049  | 4.92E-11 | 0.002244 |
| 12Oct2011  | 3105  | 767.49  | 27.31392 | 2 K.KVLTDK+ chr1@1126   | 1.33E-10 | 0.006042 |
| 13July2011 | 647   | 529.77  | 18.81549 | 4 R.STCYASN Splice@chr  | 4.53E-10 | 0.007838 |
| 12Oct2011  | 421   | 415.25  | -5.74629 | 2 K.QVMKPV chr4@7937    | 2.81E-10 | 0.00915  |
| 12Oct2011  | 2476  | 1214.64 | -28.3635 | 1 K.IQIKNVEI chr1@1352  | 2.02E-11 | 2.45E-04 |
| 13July2011 | 2389  | 418.22  | 1.024051 | 2 _YEPGKNK chr1@1810    | 1.41E-10 | 0.004585 |
| 13July2011 | 10278 | 848.94  | 1.727551 | 2 K.SKNYKIDI chr1@1173  | 3.81E-10 | 0.00985  |
| 12Oct2011  | 474   | 976.52  | 6.569609 | 1 R.LSMLDLE chr3@1348   | 4.23E-10 | 0.007654 |
| 12Oct2011  | 44    | 598.31  | 10.17783 | 2 G.TKKSDAS chrX@1598   | 1.74E-10 | 0.007549 |
| 13July2011 | 12160 | 678.87  | 9.724485 | 4 K.K+14.016 Splice@chr | 1.11E-10 | 0.002043 |
| 13July2011 | 2267  | 468.59  | 3.480906 | 3 R.ATSRAPe chr2@2986   | 4.88E-10 | 0.008756 |
| 13July2011 | 6564  | 448.27  | 25.26696 | 3 K.NYFFPTIL chr1@1171  | 3.15E-10 | 0.005707 |
| 12Oct2011  | 11696 | 780.4   | -15.7461 | 3 K.ISQK+14. chr5@5378  | 1.85E-10 | 0.004204 |
| 13July2011 | 2990  | 443.56  | -29.5132 | 3 R.IDNLQRR chr4@1146   | 3.18E-10 | 0.005943 |
| 12Oct2011  | 6187  | 525.23  | 3.058782 | 4 R.K+14.016 Splice@chr | 1.49E-10 | 0.009667 |
| 13July2011 | 16724 | 876.2   | 15.34285 | 4 R.VQWREG chrX@1103    | 1.28E-10 | 0.002044 |
| 12Oct2011  | 3805  | 654.34  | 26.09943 | 4 R.VIKMM+ Splice@chr   | 1.74E-11 | 0.003205 |
| 12Oct2011  | 328   | 502.3   | -28.3945 | 2 _RAKSREK chr5@7769    | 8.76E-11 | 8.91E-04 |
| 12Oct2011  | 9799  | 1137.57 | 26.95891 | 2 R.FCNFFFFI chr1@3616  | 1.61E-10 | 0.004212 |
| 13July2011 | 5646  | 638.82  | -19.5213 | 2 K.M+15.99 chr4@9956   | 4.28E-10 | 0.007243 |
| 13July2011 | 4395  | 733.84  | 6.377301 | 2 R.SSWWW chr4@4076     | 3.52E-10 | 0.005686 |
| 13July2011 | 1037  | 452.25  | 14.94649 | 2 R.IAEELSNK chrX@1522  | 1.44E-10 | 0.00506  |
| 12Oct2011  | 13635 | 1244.62 | -20.2029 | 2 _ERKKRWI Splice@chr   | 1.84E-10 | 0.004083 |
| 13July2011 | 15372 | 799.16  | -8.31805 | 4 K.NNLKM+ chr4@1650    | 1.78E-10 | 0.005723 |
| 13July2011 | 531   | 599.28  | -7.70705 | 2 K.KGKSDEN chr3@5504   | 8.17E-11 | 0.003249 |
| 13July2011 | 8570  | 734.1   | 17.09576 | 3 R.VAALWRI Splice@chr  | 1.05E-10 | 0.002766 |
| 12Oct2011  | 4120  | 740.4   | -18.3776 | 2 I.RKM+15.5 chr4@6062  | 1.05E-10 | 0.002463 |
| 12Oct2011  | 6616  | 750.9   | -24.3356 | 2 L.QNFRQPI chr4@1206   | 3.18E-10 | 0.007791 |
| 12Oct2011  | 3110  | 746.41  | -8.18815 | 1 K.KNANATI chrX@2791   | 3.09E-10 | 0.007909 |
| 12Oct2011  | 4304  | 577.32  | -7.09568 | 2 K.MIKTSFSI chr1@5087  | 9.40E-11 | 0.001861 |

|            |       |         |          |                          |          |          |
|------------|-------|---------|----------|--------------------------|----------|----------|
| 12Oct2011  | 4567  | 1094.58 | -1.3395  | 1 R.M+15.99 chr2@6647    | 1.85E-10 | 0.003369 |
| 12Oct2011  | 3141  | 703.35  | 8.219735 | 2 R.SRWNE chr3@7178      | 2.24E-10 | 0.007431 |
| 13July2011 | 536   | 495.26  | -0.67919 | 2 _RDEAQSk Splice@chr    | 3.50E-10 | 0.005686 |
| 13July2011 | 589   | 495.26  | -0.67919 | 2 _RDEAQSk Splice@chr    | 1.75E-10 | 0.004803 |
| 12Oct2011  | 9549  | 907.46  | -28.3469 | 2 C.SM+15.9 chr1@1382    | 1.21E-10 | 0.003156 |
| 12Oct2011  | 8568  | 736.36  | -26.2277 | 2 K.M+15.99 chr1@1374    | 1.61E-10 | 0.005113 |
| 12Oct2011  | 6048  | 736.36  | -26.2277 | 2 K.M+15.99 chr1@1374    | 3.04E-10 | 0.00915  |
| 12Oct2011  | 7358  | 1101.55 | -24.7711 | 3 K.SSGLNCS chr3@7230    | 2.37E-10 | 0.006602 |
| 12Oct2011  | 7320  | 1055.67 | -5.18094 | 2 K.VVFLKKR chr3@8689    | 1.32E-10 | 0.004723 |
| 12Oct2011  | 3477  | 603.83  | -15.5526 | 2 K.M+15.99 Splice@chr   | 2.74E-10 | 0.005119 |
| 12Oct2011  | 3646  | 603.83  | -15.5526 | 2 K.M+15.99 Splice@chr   | 1.12E-10 | 0.002363 |
| 12Oct2011  | 4425  | 918.46  | 9.619644 | 2 R.MGEQKD chr2@1066     | 1.59E-10 | 0.006944 |
| 12Oct2011  | 11779 | 955.18  | -14.6695 | 3 R.HIGM+15 chr1@1384    | 4.39E-10 | 0.006301 |
| 12Oct2011  | 319   | 533.77  | 24.97549 | 2 K.YELDEEIR chr2@8615   | 3.53E-10 | 0.009901 |
| 12Oct2011  | 10583 | 944.51  | 6.570709 | 2 K.RLFRVLFI Splice@chr  | 2.29E-10 | 0.005312 |
| 13July2011 | 502   | 544.31  | -13.0314 | 2 K.KIDEIWRI chr5@1864   | 3.86E-10 | 0.009122 |
| 12Oct2011  | 4587  | 858.95  | 17.07421 | 2 K.NIREK+14 chr3@7405   | 2.05E-10 | 0.005313 |
| 12Oct2011  | 2748  | 737.9   | 2.363663 | 2 K.VSWVAQ chr1@3777     | 3.62E-10 | 0.006842 |
| 13July2011 | 9447  | 837.9   | 11.71382 | 2 V.ISTMTND chr2@4708    | 5.15E-10 | 0.008767 |
| 13July2011 | 6931  | 520.78  | -0.87948 | 2 K.IALAYEM chr2@6701    | 8.96E-13 | 0        |
| 13July2011 | 6994  | 520.79  | 18.27955 | 2 K.IALAYEM chr2@6701    | 1.05E-12 | 0        |
| 13July2011 | 240   | 615.31  | -21.4606 | 2 _KLTK+14 chr5@1309     | 1.84E-10 | 0.00483  |
| 12Oct2011  | 978   | 717.37  | -7.92368 | 2 R.RK+14.01 chrX@1144   | 1.85E-10 | 0.005328 |
| 13July2011 | 770   | 466.77  | 16.90491 | 2 K.TADKTQI Splice@chr   | 8.37E-11 | 0.001519 |
| 12Oct2011  | 4794  | 876.45  | -28.3052 | 2 R.QK+14.0 Splice@chr   | 6.69E-11 | 0.001753 |
| 12Oct2011  | 13010 | 1067.05 | 21.56774 | 2 _TRKCK+1 chr5@4676     | 2.49E-10 | 0.00672  |
| 12Oct2011  | 4396  | 889.43  | -26.6551 | 3 K.MTEKLDK chr5@1495    | 1.92E-10 | 0.00782  |
| 13July2011 | 437   | 530.78  | 2.188999 | 2 K.INNSGKS chr4@2116    | 6.95E-11 | 0.002903 |
| 13July2011 | 6496  | 679.84  | -28.5013 | 2 K.FEK+14.0 chr3@5399   | 2.09E-10 | 0.003282 |
| 12Oct2011  | 2593  | 481.75  | -28.8191 | 2 R.FPLEETVI chr1@5157   | 1.20E-10 | 0.001701 |
| 13July2011 | 8921  | 697.34  | -19.7214 | 2 K.MDSTLNI chrX@4525    | 3.21E-11 | 0.001673 |
| 13July2011 | 8865  | 697.34  | -19.7214 | 2 K.MDSTLNI chrX@4525    | 3.26E-11 | 0.001673 |
| 13July2011 | 8809  | 697.34  | -19.7214 | 2 K.MDSTLNI chrX@4525    | 4.78E-11 | 0.002085 |
| 13July2011 | 8641  | 697.34  | -19.7214 | 2 K.MDSTLNI chrX@4525    | 1.34E-10 | 0.002304 |
| 13July2011 | 8146  | 697.34  | -19.7214 | 2 K.MDSTLNI chrX@4525    | 9.34E-11 | 0.002389 |
| 13July2011 | 8924  | 530.28  | 6.836953 | 4 K.ISSAPQRI Splice@chr  | 2.27E-10 | 0.005527 |
| 13July2011 | 15207 | 927.25  | 9.07574  | 3 K.ILRK+14.1 Splice@chr | 2.58E-10 | 0.007148 |
| 13July2011 | 14060 | 615.32  | 14.66884 | 2 R.RHSSPQL chr2@2179    | 3.37E-10 | 0.009055 |
| 12Oct2011  | 10110 | 1138.56 | -29.1874 | 2 K.KYVESRD chr5@3688    | 4.31E-10 | 0.00917  |
| 12Oct2011  | 5334  | 816.91  | -28.2549 | 2 L.RMHKM+ chr2@2085     | 3.93E-10 | 0.007497 |
| 12Oct2011  | 5633  | 816.91  | -28.2549 | 2 L.RMHKM+ chr2@2085     | 5.81E-10 | 0.009518 |
| 12Oct2011  | 4384  | 816.91  | -28.2549 | 2 L.RMHKM+ chr2@2085     | 3.11E-10 | 0.00849  |
| 12Oct2011  | 13124 | 1089.54 | -17.5547 | 3 K.LVHNDF chr2@5091     | 3.11E-11 | 5.50E-04 |
| 12Oct2011  | 8986  | 1119.59 | -15.1324 | 3 R.K+14.016 chr5@1326   | 1.18E-10 | 0.004015 |
| 12Oct2011  | 4303  | 828.02  | 7.27526  | 2 K.AQIVRKI chrX@5841    | 7.06E-12 | 0.002571 |
| 13July2011 | 125   | 511.24  | 12.68013 | 3 R.GGDGGA chr3@2778     | 8.21E-14 | 0        |
| 13July2011 | 14196 | 1096.25 | 17.78349 | 3 K.VSNVLTV Splice@chr   | 2.47E-11 | 0.001256 |

|            |       |         |          |                          |          |          |
|------------|-------|---------|----------|--------------------------|----------|----------|
| 12Oct2011  | 8902  | 1133.57 | -29.5315 | 2 N.GVRYIFV Splice@chr   | 4.64E-10 | 0.009819 |
| 12Oct2011  | 6090  | 1113.92 | -12.8696 | 3 K.EKKDSM/ Splice@chr   | 1.91E-10 | 0.005328 |
| 12Oct2011  | 846   | 552.3   | -10.2962 | 2 R.FVGNHIN chr4@6941    | 1.78E-10 | 0.005031 |
| 12Oct2011  | 10208 | 854.68  | -27.4542 | 4 K.CLKSSEN chr1@1416    | 3.13E-10 | 0.00849  |
| 13July2011 | 3271  | 421.74  | -1.66829 | 2 K.NNGTPVI chr4@1026    | 8.79E-11 | 0.002659 |
| 12Oct2011  | 8059  | 703.03  | 23.18505 | 3 R.GTWQRC Splice@chr    | 4.52E-10 | 0.009981 |
| 13July2011 | 3199  | 515.96  | 7.111602 | 3 R.RSRM+15 Splice@chr   | 2.66E-10 | 0.009028 |
| 13July2011 | 13538 | 634.02  | 11.73859 | 3 K.VDDKENI chrX@2795    | 3.56E-10 | 0.006723 |
| 13July2011 | 12395 | 793.44  | -7.29142 | 3 R.LFSAIPTL chr4@7925   | 2.48E-10 | 0.006398 |
| 12Oct2011  | 1758  | 883.4   | -4.87803 | 2 Q.GMIESTT Splice@chr   | 1.85E-11 | 7.91E-04 |
| 12Oct2011  | 1705  | 883.4   | -4.87803 | 2 Q.GMIESTT Splice@chr   | 4.52E-13 | 0        |
| 12Oct2011  | 1849  | 883.4   | -4.87803 | 2 Q.GMIESTT Splice@chr   | 7.96E-13 | 5.81E-04 |
| 12Oct2011  | 1902  | 883.4   | -4.87803 | 2 Q.GMIESTT Splice@chr   | 4.92E-13 | 0        |
| 13July2011 | 4535  | 671.82  | -23.838  | 2 ?.IDFNYLSC Splice@chr  | 4.82E-10 | 0.00842  |
| 13July2011 | 3602  | 487.8   | -19.3712 | 2 R.RTTRILSK Splice@chr  | 4.37E-10 | 0.008013 |
| 13July2011 | 3229  | 487.8   | -19.3712 | 2 R.RTTRILSK Splice@chr  | 4.25E-10 | 0.00944  |
| 13July2011 | 1494  | 549.25  | -18.7771 | 3 K.RTNHKCA chrX@5197    | 1.01E-10 | 0.001519 |
| 12Oct2011  | 9892  | 640.57  | -3.1258  | 4 _.VAM+15. chr1@1002    | 4.75E-10 | 0.009819 |
| 12Oct2011  | 6121  | 990.47  | 2.87865  | 3 _.PHCRPDA Splice@chr   | 5.19E-12 | 0        |
| 12Oct2011  | 10997 | 792.39  | 11.33747 | 2 R.FDKNHA chrX@1630     | 3.17E-10 | 0.005491 |
| 12Oct2011  | 3194  | 656.42  | 1.259788 | 2 K.K+14.016 chr4@4902   | 3.10E-10 | 0.008252 |
| 12Oct2011  | 6953  | 1040.52 | -12.893  | 2 R.KTQFHCN chr4@6357    | 5.40E-10 | 0.009082 |
| 12Oct2011  | 7564  | 807.42  | -26.7271 | 3 K.TNQIVLL chrX@1000    | 2.48E-10 | 0.004978 |
| 12Oct2011  | 8030  | 658.67  | -27.408  | 3 R.HRFEEVS Splice@chr   | 1.57E-10 | 0.002527 |
| 12Oct2011  | 5964  | 658.67  | -27.408  | 3 R.HRFEEVS Splice@chr   | 3.78E-10 | 0.009685 |
| 12Oct2011  | 11312 | 839.42  | -12.9094 | 3 R.PRLFFRS Splice@chr   | 1.81E-10 | 0.003771 |
| 12Oct2011  | 1710  | 504.74  | -1.60518 | 4 R.EDRVGYM Splice@chr   | 4.27E-10 | 0.008178 |
| 12Oct2011  | 1539  | 864.43  | -7.56375 | 2 K.RPGQSN chr5@2074     | 2.04E-11 | 5.44E-04 |
| 12Oct2011  | 5555  | 707.01  | -23.7449 | 3 R.NCFGFSC chrX@1555    | 4.12E-10 | 0.009465 |
| 12Oct2011  | 7984  | 799.67  | -16.11   | 4 R.SFDWK+ chr5@1935     | 1.87E-10 | 0.006722 |
| 12Oct2011  | 3439  | 687.67  | -26.0548 | 3 R.NNKQLDI chr5@1410    | 2.49E-10 | 0.00813  |
| 13July2011 | 8225  | 683.99  | -13.1068 | 3 R.IM+15.95 Splice@chr  | 2.07E-10 | 0.007578 |
| 13July2011 | 10372 | 552.67  | -1.9545  | 3 K.IILIMKPSI Splice@chr | 2.25E-10 | 0.006444 |
| 12Oct2011  | 5600  | 850.05  | 29.11511 | 2 K.SRRRRTSI chrX@9235   | 2.57E-10 | 0.004791 |
| 12Oct2011  | 7350  | 933.59  | 28.06128 | 2 R.EKIWSYLI chr3@8468   | 2.50E-10 | 0.007268 |
| 12Oct2011  | 936   | 660.33  | 24.43976 | 1 R.EMPGAR chrX@9444     | 3.04E-10 | 0.005812 |
| 13July2011 | 3722  | 487.8   | 21.8797  | 2 K.MNVVVS chr1@9011     | 2.26E-10 | 0.003902 |
| 13July2011 | 6422  | 700.37  | 10.03645 | 1 R.NGVEPGI chrX@5405    | 3.69E-10 | 0.006944 |
| 13July2011 | 12044 | 632     | -6.642   | 3 K.LEKLEDCI Splice@chr  | 9.67E-11 | 0.001519 |
| 13July2011 | 13007 | 613.6   | 1.693785 | 4 _.LM+15.95 Splice@chr  | 3.43E-10 | 0.008931 |
| 13July2011 | 13202 | 740.42  | -24.9849 | 2 _.DKLK+14. chr4@7174   | 2.26E-10 | 0.005133 |
| 13July2011 | 2454  | 524.76  | -16.1532 | 2 K.SLSRCAEI chrX@1538   | 3.67E-10 | 0.00936  |
| 13July2011 | 2829  | 524.76  | -16.1532 | 2 K.SLSRCAEI chrX@1538   | 1.36E-10 | 0.006487 |
| 12Oct2011  | 6096  | 1264.62 | -29.5468 | 2 R.K+14.016 chr5@2125   | 2.99E-10 | 0.006963 |
| 13July2011 | 6034  | 511.93  | -27.953  | 3 K.IGQELCS chr5@1252    | 2.82E-10 | 0.007348 |
| 12Oct2011  | 3196  | 872.43  | -28.556  | 2 _.SRRSLEV chr5@8884    | 2.24E-11 | 2.59E-04 |
| 13July2011 | 12557 | 647.33  | 16.78795 | 3 K.TLFSGSTI Splice@chr  | 2.88E-12 | 2.08E-04 |

|            |       |         |          |                          |          |          |
|------------|-------|---------|----------|--------------------------|----------|----------|
| 13July2011 | 211   | 553.29  | -23.6138 | 2 E.M+15.99 Splice@chr   | 4.04E-10 | 0.006642 |
| 12Oct2011  | 6950  | 715.3   | 12.90288 | 1 K.GYCMGK chr5@160€     | 2.36E-10 | 0.007328 |
| 13July2011 | 1547  | 431.73  | 11.47817 | 2 R.IFTDPGG chr1@2270    | 4.22E-11 | 0.001189 |
| 13July2011 | 16893 | 701.38  | 0.146336 | 3 K.KVGGRA\ chr4@6140    | 3.70E-10 | 0.009767 |
| 12Oct2011  | 12659 | 1169.59 | -1.46244 | 2 _ .M+15.99 chr4@1521   | 3.14E-11 | 5.50E-04 |
| 13July2011 | 14003 | 758.13  | 25.23303 | 4 _ .M+15.99 chr1@288€   | 4.91E-10 | 0.00842  |
| 12Oct2011  | 5919  | 678.71  | 10.96412 | 3 _ .MNIRK+1 chr5@124€   | 3.05E-11 | 0.001303 |
| 12Oct2011  | 5855  | 678.71  | 10.96412 | 3 _ .MNIRK+1 chr5@124€   | 9.31E-11 | 0.002901 |
| 12Oct2011  | 2684  | 758.89  | -22.2268 | 2 R.ELENLKV Splice@chr   | 3.21E-10 | 0.009574 |
| 12Oct2011  | 204   | 573.34  | 2.296715 | 2 _ .RSSNGGk chr3@118€   | 4.38E-11 | 0.004706 |
| 12Oct2011  | 6379  | 1015.47 | -0.42116 | 1 K.AKCTNKN chr1@1381    | 8.07E-11 | 0.004205 |
| 12Oct2011  | 4086  | 580.27  | 26.13171 | 2 K.YEYSEQN chr2@9837    | 6.49E-11 | 8.86E-04 |
| 12Oct2011  | 9921  | 1043.9  | -17.167  | 3 K.SGVDTIKl chr3@4707   | 1.39E-10 | 0.002594 |
| 12Oct2011  | 4820  | 1093.58 | 27.15051 | 1 R.RGHLPDE chr3@8397    | 3.42E-10 | 0.008215 |
| 12Oct2011  | 5284  | 1099.09 | 19.2698  | 2 R.FWCLLR Splice@chr    | 8.09E-11 | 0.003316 |
| 13July2011 | 7810  | 521.31  | -28.7394 | 2 K.SEIPRKIA Splice@chr  | 3.80E-10 | 0.00985  |
| 12Oct2011  | 6514  | 996.5   | -16.4078 | 2 L.FTLQFGL€ chr5@495€   | 1.85E-11 | 1.94E-04 |
| 12Oct2011  | 10597 | 589.8   | 27.78209 | 2 K.K+14.016 chr5@123€   | 2.24E-10 | 0.006602 |
| 12Oct2011  | 9195  | 949.6   | 12.61136 | 2 R.RREMKG chr3@136€     | 7.38E-11 | 0.002037 |
| 13July2011 | 76    | 566.79  | 3.236335 | 2 _ .EQWNMI chr4@2094    | 2.52E-10 | 0.004534 |
| 12Oct2011  | 4023  | 1120.62 | 6.604139 | 1 R.PNMMM Splice@chr     | 1.42E-10 | 0.005028 |
| 13July2011 | 8052  | 625.66  | 15.11281 | 3 R.FSPSNRD Splice@chr   | 1.59E-10 | 0.007095 |
| 13July2011 | 8152  | 625.66  | 15.11281 | 3 R.FSPSNRD Splice@chr   | 2.26E-10 | 0.007857 |
| 12Oct2011  | 9388  | 1031.99 | -4.70771 | 2 R.KM+15.9 chr4@898€    | 3.93E-11 | 0.00121  |
| 12Oct2011  | 5104  | 859.14  | 2.870693 | 3 _ .LRFKDNC chrX@105€   | 5.46E-11 | 0.002609 |
| 12Oct2011  | 6707  | 859.14  | 2.870693 | 3 _ .LRFKDNC chrX@105€   | 1.55E-10 | 0.004853 |
| 13July2011 | 13212 | 776.85  | 17.75316 | 2 S.M+15.99 Splice@chr   | 3.34E-10 | 0.008817 |
| 12Oct2011  | 6263  | 627.41  | -1.31475 | 2 K.TKNGLLL' chr5@931€   | 9.18E-11 | 0.002363 |
| 13July2011 | 11630 | 585.84  | -11.249  | 4 K.NGTLLMI chrX@131€    | 1.06E-10 | 0.002043 |
| 13July2011 | 11233 | 585.84  | -11.249  | 4 K.NGTLLMI chrX@131€    | 9.98E-11 | 0.002659 |
| 12Oct2011  | 2685  | 832.49  | 22.24229 | 1 R.TVVNLMI chrX@2920    | 2.31E-10 | 0.00556  |
| 13July2011 | 10120 | 606.64  | -27.8621 | 3 R.K+14.016 chrX@122€   | 2.85E-10 | 0.007233 |
| 13July2011 | 15337 | 602.85  | 28.9038  | 4 K.FWREFK+ chr5@405€    | 1.67E-10 | 0.002545 |
| 13July2011 | 17642 | 631.01  | -6.20034 | 3 K.LSGK+14. chr1@4154   | 5.00E-10 | 0.008844 |
| 13July2011 | 14817 | 708.92  | -6.03526 | 2 K.FFFVITVL chr2@643€   | 2.49E-10 | 0.005758 |
| 13July2011 | 6422  | 462.59  | 1.368923 | 3 K.RRYDYGK chr5@943€    | 3.31E-10 | 0.005598 |
| 12Oct2011  | 11261 | 1123.27 | -9.91857 | 3 R.LNVIPKPI Splice@chr  | 1.82E-10 | 0.005884 |
| 12Oct2011  | 9048  | 1114.26 | -26.451  | 3 R.YGFPSRS Splice@chr   | 3.97E-10 | 0.007975 |
| 13July2011 | 4998  | 595.28  | 10.84653 | 2 R.YFEQCEK Splice@chr   | 1.00E-10 | 0.003519 |
| 13July2011 | 10388 | 664.32  | -27.1439 | 2 L.CGSGLYSI chr2@824€   | 6.37E-11 | 0.001997 |
| 12Oct2011  | 8544  | 504.95  | 15.39353 | 3 _ .LQMMG€ Splice@chr   | 2.44E-10 | 0.005845 |
| 12Oct2011  | 9686  | 507.46  | 8.677165 | 5 _ .K+14.016 Splice@chr | 1.76E-11 | 0.001303 |
| 13July2011 | 2905  | 515.28  | -12.9758 | 3 R.EIAGIEVS chr2@130€   | 4.09E-10 | 0.007595 |
| 12Oct2011  | 8098  | 994.84  | -20.7023 | 3 K.SQVFSTA chrX@608€    | 3.57E-17 | 0        |
| 12Oct2011  | 5503  | 824.93  | 21.09    | 2 R.AHK+14.( Splice@chr  | 1.58E-10 | 0.005393 |
| 13July2011 | 6398  | 640.31  | 3.723404 | 2 K.MRCLPSS Splice@chr   | 3.73E-10 | 0.005913 |
| 13July2011 | 13511 | 697.04  | 0.966084 | 3 R.GRTLAKL chr2@244€    | 1.74E-11 | 1.97E-04 |

|            |       |         |          |                         |          |          |
|------------|-------|---------|----------|-------------------------|----------|----------|
| 12Oct2011  | 7330  | 842.45  | -2.87756 | 3 R.KNGSSAN chr1@6082   | 4.47E-10 | 0.007864 |
| 12Oct2011  | 6180  | 515.62  | -18.8182 | 3 K.ILKIK+14. chr2@1445 | 8.16E-11 | 0.002402 |
| 12Oct2011  | 6254  | 515.62  | -18.8182 | 3 K.ILKIK+14. chr2@1445 | 9.13E-11 | 0.00268  |
| 12Oct2011  | 5375  | 515.62  | -18.8182 | 3 K.ILKIK+14. chr2@1445 | 1.45E-10 | 0.003718 |
| 12Oct2011  | 6159  | 515.62  | -18.8182 | 3 K.ILKIK+14. chr2@1445 | 1.31E-10 | 0.003429 |
| 12Oct2011  | 7357  | 515.62  | -18.8182 | 3 K.ILKIK+14. chr2@1445 | 1.35E-10 | 0.002556 |
| 12Oct2011  | 7304  | 515.62  | -18.8182 | 3 K.ILKIK+14. chr2@1445 | 3.11E-10 | 0.00623  |
| 12Oct2011  | 7562  | 515.62  | -18.8182 | 3 K.ILKIK+14. chr2@1445 | 7.00E-11 | 8.86E-04 |
| 13July2011 | 4573  | 460.26  | 4.392893 | 2 R.NVPAINY Splice@chr  | 2.25E-10 | 0.005396 |
| 12Oct2011  | 9428  | 802.41  | -18.1259 | 1 K.NPAMKN chr2@1398    | 9.26E-11 | 0.004205 |
| 13July2011 | 6876  | 717.42  | -20.7021 | 2 _KLDLTYEL chrX@2081   | 3.51E-10 | 0.006612 |
| 13July2011 | 6152  | 717.42  | -20.7021 | 2 _KLDLTYEL chrX@2081   | 9.14E-11 | 0.003387 |
| 13July2011 | 8625  | 578.03  | 20.66312 | 4 V.VSSTLTNI chrX@1471  | 1.96E-10 | 0.005396 |
| 13July2011 | 4556  | 419.58  | -25.2443 | 3 R.PELKIAGI chr3@3349  | 7.89E-11 | 0.001519 |
| 12Oct2011  | 8340  | 740.41  | -9.24514 | 2 R.FK+14.01 chr2@1131  | 1.64E-11 | 6.22E-04 |
| 13July2011 | 13364 | 447.93  | -6.19103 | 3 K.LGNRLKN chrX@8025   | 8.18E-11 | 0.001429 |
| 13July2011 | 2788  | 400.72  | 7.024146 | 2 _SDAVPG\ Splice@chr   | 1.86E-10 | 0.00534  |
| 13July2011 | 2273  | 400.72  | 7.024146 | 2 _SDAVPG\ Splice@chr   | 3.81E-10 | 0.009934 |
| 12Oct2011  | 6420  | 772.4   | -7.70128 | 3 K.TCITTIVT chrX@1311  | 6.02E-11 | 0.00147  |
| 13July2011 | 2176  | 542.61  | -15.852  | 3 I.LSENLSFP chr1@1425  | 1.79E-10 | 0.00347  |
| 13July2011 | 2769  | 603.31  | 9.240657 | 1 R.GAGGAN chr3@2990    | 9.29E-11 | 0.003519 |
| 12Oct2011  | 2321  | 744.9   | -15.2608 | 2 R.HVCLLRS Splice@chr  | 5.43E-11 | 0.002195 |
| 13July2011 | 11361 | 616.02  | 17.79775 | 3 K.LQIFETPF chr1@1059  | 1.15E-10 | 0.004302 |
| 12Oct2011  | 6578  | 795.9   | -24.7239 | 2 K.M+15.99 chrX@1355   | 1.74E-10 | 0.003124 |
| 13July2011 | 1444  | 530.77  | -7.37354 | 2 L.RADHTHF chr3@8398   | 1.83E-10 | 0.00347  |
| 13July2011 | 593   | 531.28  | 8.35486  | 2 L.RADHTHF chr3@8398   | 4.03E-11 | 9.79E-04 |
| 13July2011 | 671   | 531.28  | 8.35486  | 2 L.RADHTHF chr3@8398   | 2.27E-10 | 0.00554  |
| 13July2011 | 1365  | 530.77  | -7.37354 | 2 L.RADHTHF chr3@8398   | 2.11E-10 | 0.005175 |
| 13July2011 | 727   | 531.27  | -10.5398 | 2 L.RADHTHF chr3@8398   | 1.41E-10 | 0.003985 |
| 13July2011 | 743   | 531.27  | -10.5398 | 2 L.RADHTHF chr3@8398   | 1.85E-10 | 0.007148 |
| 13July2011 | 6739  | 556.82  | -3.07474 | 2 K.VIVVYAA chr3@8274   | 1.01E-10 | 0.004772 |
| 13July2011 | 9200  | 550.82  | 20.90876 | 4 R.HSSGLKN chr5@1455   | 9.15E-11 | 0.001429 |
| 12Oct2011  | 3194  | 1149.53 | -28.6661 | 1 R.ERESGRN chr4@4454   | 1.24E-10 | 0.0027   |
| 12Oct2011  | 7341  | 689.44  | 25.44555 | 2 K.K+14.016 chrX@1321  | 1.93E-11 | 0.001303 |
| 13July2011 | 12863 | 879.82  | -4.23735 | 3 K.EHWRLC chr4@2176    | 3.41E-10 | 0.008931 |
| 12Oct2011  | 3359  | 559.36  | 14.64816 | 2 _WKK+14. Splice@chr   | 1.64E-10 | 0.003793 |
| 12Oct2011  | 5812  | 865.46  | -19.8854 | 2 _RLM+15.1 chr1@1258   | 3.27E-10 | 0.008032 |
| 13July2011 | 7664  | 590.83  | -8.07142 | 2 K.IISLPDFFI chr4@4930 | 2.08E-10 | 0.005999 |
| 12Oct2011  | 8370  | 829.93  | -10.2347 | 4 R.RYYCAPC chr1@6328   | 2.72E-10 | 0.006786 |
| 12Oct2011  | 8049  | 829.93  | -10.2347 | 4 R.RYYCAPC chr1@6328   | 5.73E-11 | 0.002262 |
| 13July2011 | 6519  | 629.35  | 0.388547 | 2 K.NRTLGS Splice@chr   | 1.53E-10 | 0.002875 |
| 13July2011 | 4677  | 463.74  | -28.7537 | 2 _FLVFESGI chr5@1959   | 1.96E-10 | 0.005723 |
| 13July2011 | 5111  | 463.74  | -28.7537 | 2 _FLVFESGI chr5@1959   | 2.12E-10 | 0.007704 |
| 13July2011 | 16181 | 1032.21 | -18.0573 | 3 R.RLSMERE chr2@1280   | 3.52E-10 | 0.005686 |
| 13July2011 | 2657  | 631.84  | -28.1544 | 2 R.MKLM+1 chr1@9805    | 2.20E-10 | 0.003902 |
| 12Oct2011  | 9023  | 627.36  | 11.01848 | 3 _PM+15.9 Splice@chr   | 3.79E-10 | 0.0072   |
| 13July2011 | 12527 | 663.35  | 5.52906  | 2 R.M+15.99 chr4@7235   | 1.05E-10 | 0.003072 |

|            |       |         |          |                         |          |          |
|------------|-------|---------|----------|-------------------------|----------|----------|
| 12Oct2011  | 989   | 586.29  | 24.82004 | 2 K.HQHHLPI chrX@1624   | 1.83E-10 | 0.005276 |
| 13July2011 | 2756  | 533.02  | 16.90253 | 4 K.SCRKTAK chr1@9854   | 1.97E-10 | 0.005396 |
| 12Oct2011  | 8182  | 711.37  | 20.87928 | 2 R.EFLREAEI Splice@chr | 1.35E-10 | 0.002123 |
| 12Oct2011  | 3077  | 669.86  | -6.20521 | 2 K.KCNVSTF chr5@1635   | 2.96E-10 | 0.007078 |
| 13July2011 | 13587 | 808.17  | 9.830302 | 4 K.K+14.016 chr4@1175  | 4.30E-10 | 0.007243 |
| 12Oct2011  | 4831  | 729.03  | 1.453176 | 3 K.NVQKCTI chr3@1195   | 1.77E-10 | 0.006385 |
| 12Oct2011  | 4096  | 831.46  | 2.93986  | 1 R.DVDTILR. chr5@6015  | 5.35E-10 | 0.006909 |
| 12Oct2011  | 8243  | 1215.59 | -18.1724 | 2 R.AIRCLHSI chr4@7340  | 3.47E-10 | 0.009209 |
| 12Oct2011  | 6985  | 1045.85 | -3.95336 | 3 R.NKYNCRI chr3@9898   | 2.20E-10 | 0.006021 |
| 12Oct2011  | 5904  | 544.35  | 9.885386 | 2 K.K+14.016 chrX@1357  | 2.06E-10 | 0.004755 |
| 13July2011 | 2359  | 507.77  | 23.60708 | 2 K.IVDFMFS chr5@7515   | 1.80E-10 | 0.00483  |
| 12Oct2011  | 6592  | 830.94  | -7.28064 | 2 _DDKNKSE chr2@1475    | 2.64E-10 | 0.008407 |
| 12Oct2011  | 4998  | 627.41  | 24.43001 | 2 K.IVFGKKYI chr5@3215  | 3.80E-10 | 0.009427 |
| 12Oct2011  | 10888 | 434.22  | 9.839749 | 5 R.EFRYWSTI chr1@1376  | 5.96E-11 | 8.91E-04 |
| 13July2011 | 895   | 470.26  | -4.48736 | 2 _VVATAHI chr5@6165    | 2.06E-10 | 0.005396 |
| 13July2011 | 954   | 470.26  | -4.48736 | 2 _VVATAHI chr5@6165    | 1.98E-10 | 0.007297 |
| 12Oct2011  | 5956  | 571.87  | -14.4337 | 2 K.SRRSKPII chrX@4425  | 9.51E-11 | 0.001381 |
| 12Oct2011  | 7388  | 637.86  | -7.76288 | 2 K.ILTSDK+1 chr5@8768  | 3.34E-10 | 0.005281 |
| 12Oct2011  | 7746  | 637.86  | -7.76288 | 2 K.ILTSDK+1 chr5@8768  | 1.70E-10 | 0.003342 |
| 12Oct2011  | 8869  | 637.86  | -7.76288 | 2 K.ILTSDK+1 chr5@8768  | 1.80E-10 | 0.003762 |
| 12Oct2011  | 8831  | 637.86  | -7.76288 | 2 K.ILTSDK+1 chr5@8768  | 7.57E-11 | 0.001545 |
| 12Oct2011  | 5524  | 637.86  | -7.76288 | 2 K.ILTSDKK+ chr5@8768  | 7.86E-11 | 0.002095 |
| 12Oct2011  | 6443  | 637.86  | -7.76288 | 2 K.ILTSDK+1 chr5@8768  | 9.84E-11 | 0.001184 |
| 13July2011 | 9263  | 501.63  | -6.98995 | 3 K.ILHFKVLC chr5@1670  | 2.34E-10 | 0.005133 |
| 12Oct2011  | 2657  | 539.29  | -4.19537 | 2 R.ENKMAFI Splice@chr  | 2.98E-10 | 0.005644 |
| 13July2011 | 9569  | 705.69  | -2.85859 | 3 R.TFSKNFTI chr4@1385  | 9.97E-11 | 0.001519 |
| 12Oct2011  | 5741  | 625.33  | -11.8995 | 3 K.KNNTKLV chr4@9084   | 1.26E-10 | 0.002687 |
| 12Oct2011  | 9497  | 737.06  | -15.368  | 3 S.SFGSLEK+ chr1@5550  | 1.65E-10 | 0.002911 |
| 13July2011 | 2634  | 443.56  | 0.735554 | 3 _LDDLPTCI chr1@1404   | 3.45E-10 | 0.008931 |
| 12Oct2011  | 11833 | 1003.6  | -24.6163 | 1 R.VSPRIFRI chr5@1795  | 1.85E-10 | 0.006143 |
| 12Oct2011  | 8330  | 783     | 23.08074 | 2 R.KLYK+14. chr5@4465  | 3.18E-11 | 2.60E-04 |
| 13July2011 | 2921  | 452.92  | -4.14182 | 3 K.INLNSHSI chr1@1425  | 1.63E-10 | 0.003775 |
| 12Oct2011  | 12125 | 812.48  | 28.1688  | 1 R.RATNPPFI chr2@4121  | 1.14E-10 | 0.001481 |
| 12Oct2011  | 945   | 468.57  | 0.480517 | 3 R.FSM+15.5 Splice@chr | 2.11E-10 | 0.005059 |
| 13July2011 | 16195 | 850.42  | -11.4968 | 2 _ELCVFSP/ chr5@4360   | 1.99E-11 | 2.97E-04 |
| 12Oct2011  | 3997  | 766.49  | -19.9332 | 2 S.K+14.016 Splice@chr | 4.61E-11 | 0.001929 |
| 12Oct2011  | 6960  | 808.38  | 3.787244 | 1 K.TEKEAET. chrX@9286  | 1.96E-10 | 0.009615 |
| 12Oct2011  | 1850  | 602.82  | -0.30426 | 2 M.PFSTAID chr4@5297   | 1.24E-10 | 0.007131 |
| 12Oct2011  | 1452  | 491.6   | -23.1399 | 3 K.GK+14.01 chr1@1321  | 5.91E-11 | 0.003784 |
| 13July2011 | 10389 | 711.36  | 26.8085  | 2 R.RRETCVC chr2@1472   | 1.35E-10 | 0.002304 |
| 12Oct2011  | 3785  | 544.35  | -2.80831 | 2 K.TKS VKKV chr5@1935  | 1.94E-10 | 0.005976 |
| 12Oct2011  | 2364  | 544.35  | -2.80831 | 2 K.TKS VKKV chr5@1935  | 2.07E-10 | 0.0068   |
| 13July2011 | 7571  | 475.24  | 2.745674 | 3 K.IGM+15.5 chr3@1802  | 2.56E-10 | 0.007148 |
| 12Oct2011  | 6134  | 809.92  | 0.679081 | 2 K.VPKCKKH chr1@4195   | 2.68E-10 | 0.007351 |
| 12Oct2011  | 13416 | 916.44  | -19.9545 | 1 K.HEGRNFF chrX@1498   | 3.96E-10 | 0.007987 |
| 12Oct2011  | 4125  | 586.36  | 8.341736 | 2 R.KTGRVGI chr2@1340   | 3.54E-10 | 0.006988 |
| 12Oct2011  | 2599  | 586.36  | 8.341736 | 2 R.KTGRVGI chr2@1340   | 1.69E-10 | 0.006421 |

|            |       |         |          |                         |          |          |
|------------|-------|---------|----------|-------------------------|----------|----------|
| 12Oct2011  | 2872  | 473.25  | -2.15409 | 3 K.IHM+15.5 Splice@chr | 3.06E-11 | 5.03E-04 |
| 13July2011 | 8712  | 643.08  | -25.9506 | 4 K.KTKTELNI chr4@1737  | 4.28E-10 | 0.007919 |
| 12Oct2011  | 11192 | 1019.51 | -24.2696 | 1 K.KSWCSLP Splice@chr  | 2.55E-10 | 0.007092 |
| 12Oct2011  | 3138  | 503.78  | -5.09866 | 2 K.FSLLTPNS Splice@chr | 2.06E-10 | 0.006179 |
| 12Oct2011  | 13224 | 957.84  | -3.21107 | 3 R.DNCLLLD chr4@3595   | 5.18E-10 | 0.008798 |
| 12Oct2011  | 6336  | 1083.68 | 9.391793 | 2 K.K+14.016 chr2@1358  | 9.39E-11 | 0.006149 |
| 12Oct2011  | 4724  | 822.44  | -6.53865 | 2 K.RISTRSDT chr4@1148  | 2.33E-10 | 0.005312 |
| 13July2011 | 7185  | 488.6   | -3.17113 | 3 K.VKLM+15 chrX@5765   | 1.01E-10 | 0.002659 |
| 13July2011 | 5219  | 570.31  | 9.577561 | 3 R.TM+15.9 Splice@chr  | 1.05E-10 | 0.00365  |
| 12Oct2011  | 2708  | 738.98  | -12.868  | 2 R.K+14.016 chr3@1567  | 1.56E-10 | 0.006944 |
| 12Oct2011  | 7190  | 707.03  | -23.3797 | 3 R.VKYVAQ\ chr3@1161   | 1.56E-10 | 0.003998 |
| 12Oct2011  | 6898  | 765.61  | -11.8772 | 4 R.SSNCDSC Splice@chr  | 2.39E-10 | 0.003515 |
| 12Oct2011  | 2468  | 599.39  | -1.27428 | 2 R.KILGIGRR chr3@4666  | 2.59E-10 | 0.005291 |
| 13July2011 | 14501 | 715.41  | 4.271783 | 2 R.MNADIG chrX@2707    | 2.04E-10 | 0.007578 |
| 12Oct2011  | 1158  | 543.63  | -27.8197 | 3 K.KIEENSK+ chr3@1228  | 1.33E-10 | 0.006494 |
| 13July2011 | 13496 | 474.28  | -15.3895 | 3 _R.CTIVLFL Splice@chr | 1.07E-10 | 0.003891 |
| 13July2011 | 13315 | 474.28  | -15.3895 | 3 _R.CTIVLFL Splice@chr | 1.24E-10 | 0.004171 |
| 12Oct2011  | 4483  | 752.11  | 19.28626 | 3 _LLFRYVEE chr5@1890   | 7.79E-11 | 0.003679 |
| 12Oct2011  | 532   | 531.76  | 14.48989 | 2 R.REASEEV chrX@1301   | 8.15E-11 | 8.91E-04 |
| 12Oct2011  | 10632 | 1217.66 | -3.71231 | 2 R.NNTK+14 chr5@6416   | 5.92E-10 | 0.009983 |
| 12Oct2011  | 7032  | 728.39  | -18.7753 | 3 R.SWRLSS Splice@chr   | 5.92E-11 | 0.002262 |
| 13July2011 | 12339 | 555.97  | 19.65028 | 3 K.M+15.99 chr5@1600   | 1.93E-10 | 0.003679 |
| 12Oct2011  | 1233  | 620.82  | 19.76208 | 2 K.KIM+15.5 chr5@9528  | 6.02E-11 | 0.001468 |
| 12Oct2011  | 6299  | 866.15  | 13.54564 | 3 K.GWKSLNI chr5@1729   | 4.16E-11 | 0.001929 |
| 13July2011 | 9704  | 656.7   | -15.2657 | 3 K.FQEYLYI chr5@1916   | 4.94E-10 | 0.008534 |
| 12Oct2011  | 12703 | 1054.87 | -22.0717 | 3 K.KFWREV\ chr5@5640   | 4.11E-10 | 0.007835 |
| 13July2011 | 796   | 546.3   | 14.39857 | 2 R.RNTRNHI chr5@1970   | 7.56E-11 | 0.002423 |
| 12Oct2011  | 3646  | 820.85  | -22.3833 | 2 R.NISITCWI chr4@6337  | 3.44E-10 | 0.009657 |
| 12Oct2011  | 4232  | 499.31  | -17.5765 | 2 K.IETLILAP\ chr3@2716 | 3.18E-10 | 0.008623 |
| 12Oct2011  | 5228  | 772.49  | -21.4395 | 2 _FLEVIQKk chr4@7312   | 1.13E-10 | 0.004245 |
| 13July2011 | 11089 | 573.83  | 11.89294 | 2 E.SPTIMTTI chrX@1024  | 4.76E-10 | 0.00842  |
| 12Oct2011  | 1802  | 601.3   | 26.53807 | 2 R.GEGWPG chrX@1658    | 1.85E-10 | 0.004253 |
| 12Oct2011  | 7707  | 1119.58 | 28.32927 | 3 _FQKM+15 Splice@chr   | 2.27E-10 | 0.00959  |
| 13July2011 | 10307 | 701.36  | -26.4055 | 2 R.RPTISEFS chr5@2209  | 2.13E-10 | 0.005999 |
| 12Oct2011  | 9102  | 858.94  | -3.98395 | 2 R.RFQK+14 chr5@7083   | 1.35E-10 | 0.004723 |
| 12Oct2011  | 7163  | 710.95  | 24.41665 | 2 _KINLGK+7 chr4@3236   | 2.23E-10 | 0.003298 |
| 13July2011 | 7226  | 626.68  | 23.52414 | 3 R.VVDALGI Splice@chr  | 2.30E-12 | 1.79E-04 |
| 12Oct2011  | 2756  | 472.76  | 17.31518 | 4 K.IHIYFSN chr5@1242   | 1.74E-10 | 0.004521 |
| 12Oct2011  | 10392 | 675.34  | -25.6142 | 4 K.TLK+14.0 chr5@1258  | 3.74E-10 | 0.005462 |
| 13July2011 | 10619 | 729.36  | -28.6584 | 4 K.QEK+14.0 chr1@1006  | 2.08E-10 | 0.005175 |
| 13July2011 | 15015 | 929.99  | 13.75244 | 4 R.QTGK+14 chr2@1518   | 2.26E-10 | 0.005396 |
| 12Oct2011  | 7115  | 619.01  | 6.292452 | 3 R.QMKMAI chr1@8324    | 5.78E-10 | 0.009518 |
| 13July2011 | 11694 | 883.48  | 8.755494 | 2 N.RRAFGV\ Splice@chr  | 1.08E-10 | 0.003891 |
| 12Oct2011  | 5248  | 936.5   | 10.56962 | 2 Y.MKPAVA\ chr3@2298   | 2.94E-10 | 0.007068 |
| 12Oct2011  | 13112 | 622.33  | 5.894093 | 3 S.LFGTIVCN chr5@1591  | 2.83E-10 | 0.005298 |
| 12Oct2011  | 1383  | 535.61  | 14.9671  | 3 K.NLIYSEGF chrX@6412  | 3.65E-10 | 0.009871 |
| 12Oct2011  | 11531 | 1124.55 | -3.9113  | 3 K.K+14.016 chr2@1580  | 4.81E-10 | 0.006492 |

|            |       |         |          |                          |          |          |
|------------|-------|---------|----------|--------------------------|----------|----------|
| 12Oct2011  | 3733  | 924.99  | -27.8751 | 2 K.FYFVSQK Splice@chr   | 1.64E-10 | 0.00435  |
| 12Oct2011  | 10014 | 1049.86 | 9.31086  | 3 _..M+15.99 chrX@3458   | 6.29E-11 | 0.001476 |
| 13July2011 | 16184 | 776.42  | 3.282064 | 3 R.FQILFKD5 chr2@8906   | 2.48E-10 | 0.008611 |
| 12Oct2011  | 8157  | 565.31  | -23.3386 | 3 K.M+15.99 chr2@9629    | 1.90E-10 | 0.006663 |
| 12Oct2011  | 5928  | 833.53  | 26.66754 | 2 K.KNKFFKFI Splice@chr  | 3.22E-10 | 0.007779 |
| 12Oct2011  | 9925  | 1151.69 | 20.68704 | 2 K.IVEIPLNQ Splice@chr  | 4.59E-11 | 5.02E-04 |
| 12Oct2011  | 10253 | 1152.2  | 27.92843 | 2 K.IVEIPLNQ Splice@chr  | 2.27E-10 | 0.003293 |
| 12Oct2011  | 10285 | 1151.69 | 20.68704 | 2 K.IVEIPLNQ Splice@chr  | 8.94E-14 | 0        |
| 12Oct2011  | 10283 | 1152.19 | 19.22927 | 2 K.IVEIPLNQ Splice@chr  | 1.17E-12 | 0        |
| 12Oct2011  | 6310  | 839.44  | -8.50085 | 4 K.NHSLGPR chr2@2122    | 2.35E-10 | 0.006219 |
| 12Oct2011  | 7113  | 1054.53 | -25.7222 | 3 R.IFLLFSSN chr3@2392   | 5.64E-11 | 0.003784 |
| 12Oct2011  | 9803  | 678.84  | -2.58894 | 4 R.QKSSTLS chrX@2940    | 1.88E-10 | 0.004204 |
| 13July2011 | 8975  | 456.25  | -12.6026 | 3 R.KFMRQLI chr2@4703    | 3.32E-10 | 0.009242 |
| 12Oct2011  | 7462  | 772.49  | 12.97489 | 4 _..CVQLIGLI chr2@3037  | 1.14E-10 | 0.005901 |
| 12Oct2011  | 10826 | 780.64  | 0.568453 | 4 K.NVVFAYC chr5@6733    | 5.05E-10 | 0.006695 |
| 13July2011 | 15095 | 739.41  | 18.88355 | 3 K.PDLKPSTI chr2@1061   | 2.67E-10 | 0.006689 |
| 13July2011 | 847   | 494.27  | 23.22717 | 2 K.KESSPPW chr4@8430    | 7.64E-11 | 0.002423 |
| 12Oct2011  | 1743  | 418.24  | 13.556   | 3 K.RKTSNPH chr1@2535    | 4.27E-11 | 0.001753 |
| 12Oct2011  | 9010  | 1049.86 | 9.388451 | 3 R.WK+14.0 Splice@chr   | 4.91E-10 | 0.009082 |
| 12Oct2011  | 8549  | 632.07  | -24.4538 | 4 K.ISK+14.0: chr1@1197  | 2.06E-10 | 0.003897 |
| 12Oct2011  | 7517  | 743.46  | -10.1579 | 2 F.VALM+15 chr5@4900    | 1.32E-10 | 0.002604 |
| 12Oct2011  | 7869  | 743.47  | 3.250806 | 2 F.VALM+15 chr5@4900    | 3.06E-10 | 0.005054 |
| 12Oct2011  | 8204  | 1083.03 | -20.5322 | 2 R.KNK+14.( chrX@2204   | 1.82E-10 | 0.005976 |
| 13July2011 | 2892  | 525.77  | -15.469  | 2 R.YPATWR chr3@4627     | 1.68E-10 | 0.005462 |
| 13July2011 | 5167  | 515.28  | 7.833112 | 2 E.AISDGRS Splice@chr   | 2.43E-10 | 0.006853 |
| 13July2011 | 12836 | 770.4   | -26.4264 | 3 R.NMTSIHS Splice@chr   | 1.86E-10 | 0.00483  |
| 12Oct2011  | 7262  | 799.91  | -5.38813 | 2 K.HVYIQFYI chrX@9818   | 8.35E-11 | 0.001222 |
| 12Oct2011  | 11675 | 984.47  | -26.3961 | 3 R.HKEHENI chr3@1031    | 8.14E-11 | 0.001222 |
| 12Oct2011  | 245   | 784.37  | 26.5283  | 1 R.YDACVR. chrX@1270    | 4.88E-10 | 0.006492 |
| 12Oct2011  | 5212  | 1218.67 | -3.99377 | 3 R.K+14.016 chr1@3801   | 4.06E-10 | 0.009465 |
| 13July2011 | 11617 | 901.01  | -9.69769 | 2 _..LETGIKPI Splice@chr | 2.09E-11 | 1.97E-04 |
| 13July2011 | 12098 | 901.01  | -9.69769 | 2 _..LETGIKPI Splice@chr | 3.69E-11 | 0.001724 |
| 12Oct2011  | 7769  | 930.16  | -20.1288 | 3 _..HLSFWKL Splice@chr  | 1.94E-10 | 0.005941 |
| 13July2011 | 14580 | 598.84  | -22.0175 | 2 K.FSVFVAN chr4@5147    | 4.63E-10 | 0.008193 |
| 12Oct2011  | 5543  | 640.35  | -22.0521 | 2 R.KLFFAHFI chr2@1357   | 3.84E-11 | 5.18E-04 |
| 13July2011 | 9176  | 505.51  | 19.33776 | 4 R.PM+15.9 Splice@chr   | 1.50E-10 | 0.00472  |
| 13July2011 | 11665 | 882.47  | -26.2215 | 2 K.KTRQAG Splice@chr    | 2.11E-11 | 0.001217 |
| 12Oct2011  | 2482  | 625     | -25.0847 | 3 R.QLRILRSE Splice@chr  | 1.73E-10 | 0.006385 |
| 13July2011 | 13737 | 810.11  | 27.09422 | 3 S.WEDVTM chr2@1003     | 3.83E-11 | 0.001673 |
| 12Oct2011  | 6876  | 740.07  | -19.93   | 3 R.RLVSSM+ chrX@2736    | 7.27E-11 | 0.002037 |
| 13July2011 | 7198  | 593.84  | -9.57474 | 2 R.NEIVFQV chrX@1474    | 1.07E-10 | 0.005099 |
| 12Oct2011  | 5885  | 539.3   | -12.2897 | 3 K.FTEITQK+ chr2@8231   | 2.67E-10 | 0.006122 |
| 12Oct2011  | 3214  | 687.95  | -18.9815 | 2 K.KIFVK+14 chr3@6040   | 3.11E-10 | 0.007779 |
| 12Oct2011  | 13295 | 1109.58 | -19.8203 | 2 K.NQFFGKk chr1@4946    | 1.27E-10 | 0.0027   |
| 12Oct2011  | 2024  | 455.29  | 22.03473 | 2 R.KNPVLNF Splice@chr   | 8.99E-11 | 0.003679 |
| 12Oct2011  | 1477  | 858.92  | -6.93928 | 2 K.NSKKFEN chr4@2441    | 1.13E-11 | 0.003205 |
| 13July2011 | 13114 | 763.48  | -1.96108 | 2 K.EKSLKIKIF chr1@3515  | 5.26E-10 | 0.008879 |

|            |       |         |          |                         |          |          |
|------------|-------|---------|----------|-------------------------|----------|----------|
| 13July2011 | 10887 | 509.92  | -7.43577 | 3 K.FIYFSLISC chr2@6725 | 5.36E-10 | 0.008995 |
| 13July2011 | 5866  | 605.29  | 11.71665 | 2 R.TCKTNNC chr4@1361   | 1.80E-10 | 0.0028   |
| 12Oct2011  | 2355  | 679.86  | 3.866117 | 2 K.HYELSVEI chr1@6242  | 7.67E-11 | 0.002104 |
| 12Oct2011  | 10244 | 810.96  | -24.4149 | 2 R.K+14.016 chr4@1350  | 1.10E-10 | 0.002321 |
| 13July2011 | 11107 | 605.87  | -19.9793 | 2 V.PSILLYLLI chrX@1323 | 3.41E-10 | 0.00627  |
| 12Oct2011  | 2007  | 574.32  | 18.31156 | 2 K.LLTPPGG Splice@chr  | 6.86E-11 | 0.003055 |
| 13July2011 | 1495  | 474.31  | 26.5961  | 2 K.KKSIFAPF chrX@1484  | 5.60E-10 | 0.009215 |
| 12Oct2011  | 6101  | 538.29  | 5.831492 | 3 K.TFEISTRA Splice@chr | 1.02E-10 | 0.002463 |
| 13July2011 | 3991  | 573.78  | -5.59745 | 2 R.FEYVMSL chrX@6176   | 1.00E-11 | 3.28E-04 |
| 13July2011 | 5359  | 453.25  | -13.406  | 3 R.RRNDSEF chr3@1151   | 2.56E-10 | 0.00889  |
| 13July2011 | 6167  | 449.59  | -14.3862 | 3 K.HK+14.01 chrX@2783  | 5.45E-11 | 0.001705 |
| 12Oct2011  | 8147  | 1002.5  | -22.7317 | 2 _GLATK+1. chr3@1222   | 2.76E-10 | 0.008412 |
| 12Oct2011  | 1519  | 573.38  | 18.41296 | 2 K.AKTTK+1. chr1@7263  | 9.55E-11 | 0.003276 |
| 12Oct2011  | 8139  | 811.45  | 23.34693 | 2 R.RM+15.9 chr3@8962   | 4.01E-10 | 0.009877 |
| 13July2011 | 17446 | 783.68  | 21.83573 | 4 R.IKTLKNK\ chr5@9261  | 7.53E-11 | 0.001429 |
| 12Oct2011  | 7878  | 1020    | -19.2268 | 2 R.IKYYFNEk chr4@3311  | 3.47E-10 | 0.006669 |
| 12Oct2011  | 77    | 691.85  | -7.77464 | 2 K.KNGKYVS chr3@6126   | 1.82E-10 | 0.007941 |
| 12Oct2011  | 3778  | 869.42  | -20.4275 | 2 K.REFSGKIF chr1@1178  | 4.01E-10 | 0.008972 |
| 12Oct2011  | 10461 | 1017.56 | 3.755507 | 2 R.RSLCYHR chr2@1129   | 2.54E-10 | 0.007756 |
| 12Oct2011  | 1049  | 773.43  | 15.40872 | 2 G.SRKSCSP Splice@chr  | 2.71E-10 | 0.007821 |
| 12Oct2011  | 9976  | 622.85  | -1.42263 | 2 R.VAAAIPP. chr2@1215  | 3.36E-10 | 0.008021 |
| 12Oct2011  | 7447  | 728.39  | 10.32686 | 3 K.KSGKGEP Splice@chr  | 1.62E-10 | 0.005639 |
| 12Oct2011  | 356   | 561.3   | -6.97176 | 3 K.SRNFK+1 chr5@1461   | 4.39E-11 | 0.001812 |
| 12Oct2011  | 10127 | 846.96  | -5.77194 | 2 R.KIRCTVEF chr1@1396  | 2.05E-10 | 0.004755 |
| 13July2011 | 11454 | 581.81  | 1.155966 | 2 K.SWVDSSC chr2@1165   | 1.30E-10 | 0.003985 |
| 13July2011 | 11221 | 581.81  | 1.155966 | 2 K.SWVDSSC chr2@1165   | 5.63E-10 | 0.009573 |
| 13July2011 | 3601  | 470.25  | -18.2269 | 2 K.NLLEKNA chr4@1023   | 5.43E-10 | 0.009215 |
| 13July2011 | 3403  | 489.3   | 10.01236 | 2 L.RTTTGISII chr5@1648 | 3.37E-10 | 0.006155 |
| 13July2011 | 3343  | 489.3   | 10.01236 | 2 L.RTTTGISII chr5@1648 | 2.94E-10 | 0.005245 |
| 12Oct2011  | 6485  | 794.01  | 27.93987 | 2 R.DNSKK+1 Splice@chr  | 2.87E-10 | 0.005054 |
| 13July2011 | 2125  | 414.88  | -10.2247 | 3 K.NLGDVSV chr5@1616   | 5.52E-11 | 0.00121  |
| 12Oct2011  | 6660  | 857.94  | 5.555595 | 2 R.NPNFCSL chr1@4389   | 5.86E-10 | 0.007527 |
| 12Oct2011  | 7318  | 648.38  | -21.4014 | 2 R.AREIGNK chr4@1077   | 5.08E-10 | 0.009082 |
| 12Oct2011  | 1293  | 537.3   | -10.649  | 2 R.KVVDEIV chr4@1284   | 4.06E-10 | 0.009645 |
| 13July2011 | 16514 | 818.42  | -12.3244 | 3 R.TSSIPTSK Splice@chr | 5.21E-10 | 0.008879 |
| 12Oct2011  | 7904  | 710.15  | 18.53401 | 4 K.IEILKKAFI chr5@9506 | 3.56E-11 | 0.00135  |
| 12Oct2011  | 7935  | 710.15  | 18.53401 | 4 K.IEILKKAFI chr5@9506 | 1.21E-10 | 0.004127 |
| 12Oct2011  | 496   | 435.75  | -1.61453 | 2 _VVEDLPA Splice@chr   | 5.19E-10 | 0.009082 |
| 12Oct2011  | 1223  | 409.24  | 28.03408 | 2 R.IVMTPEK chr5@2483   | 1.37E-10 | 0.001701 |
| 12Oct2011  | 4125  | 1185.61 | -11.5412 | 1 K.M+15.99 chr3@2061   | 4.09E-10 | 0.008874 |
| 12Oct2011  | 10230 | 665.37  | 11.66767 | 2 R.NIEVSNN chr5@1857   | 6.99E-10 | 0.009424 |
| 12Oct2011  | 6004  | 665.37  | 11.66767 | 2 R.NIEVSNN chr5@1857   | 3.19E-11 | 0.001929 |
| 12Oct2011  | 7415  | 799.93  | 21.87662 | 4 R.RLSKSRC\ chr5@8796  | 4.42E-11 | 0.001745 |
| 13July2011 | 17637 | 795.66  | -2.97654 | 4 K.SGTIFDNI Splice@chr | 5.40E-10 | 0.009268 |
| 13July2011 | 17491 | 795.66  | -2.97654 | 4 K.SGTIFDNI Splice@chr | 1.40E-10 | 0.002522 |
| 13July2011 | 16749 | 795.66  | -2.97654 | 4 K.SGTIFDNI Splice@chr | 1.77E-10 | 0.004288 |
| 12Oct2011  | 8419  | 689.43  | 28.52719 | 2 K.IRKYIVFF\ chr3@2621 | 4.61E-10 | 0.009819 |

|            |       |         |          |                         |          |          |
|------------|-------|---------|----------|-------------------------|----------|----------|
| 13July2011 | 9077  | 755.39  | 10.03263 | 4 R.STIWEIPE chr1@1003  | 1.18E-10 | 0.005566 |
| 12Oct2011  | 2784  | 790.95  | -6.49025 | 2 K.KHFNQSI Splice@chr  | 5.94E-11 | 0.004706 |
| 12Oct2011  | 8894  | 1013.51 | -24.8165 | 2 E.FRTDDGL chr3@1290   | 1.93E-10 | 0.00457  |
| 12Oct2011  | 343   | 418.89  | -1.60621 | 3 R.YEK+14.0 chr2@5692  | 2.30E-10 | 0.006329 |
| 12Oct2011  | 1586  | 1046.56 | 4.319842 | 1 R.ALIVCLDI chr2@1175  | 5.21E-10 | 0.009255 |
| 12Oct2011  | 9192  | 807.38  | 1.139446 | 1 R.TFMVPPI chr1@1186   | 4.12E-10 | 0.007975 |
| 12Oct2011  | 725   | 509.29  | -8.16546 | 2 R.KSSIGNG chrX@9192   | 2.92E-10 | 0.005644 |
| 12Oct2011  | 7303  | 742.4   | -23.8011 | 3 K.IEK+14.0: chr2@1069 | 4.04E-10 | 0.007672 |
| 12Oct2011  | 6744  | 1016.55 | -3.51658 | 2 E.RKESKND chr2@5871   | 1.62E-10 | 0.007781 |
| 12Oct2011  | 11145 | 936.85  | -11.0252 | 3 R.QHLFINK chr2@5735   | 6.53E-10 | 0.008135 |
| 13July2011 | 16928 | 803.47  | 28.70074 | 3 S.KCRK+14. chrX@5761  | 1.13E-10 | 0.003891 |
| 13July2011 | 14369 | 752.39  | -20.578  | 3 _SHRIVPIH chr2@3964   | 2.74E-10 | 0.007589 |
| 12Oct2011  | 9871  | 921.47  | -9.37162 | 3 R.SILWNFC chr2@1386   | 2.16E-10 | 0.004389 |
| 12Oct2011  | 839   | 453.72  | 15.1868  | 2 R.GMSSAA chr5@2445    | 6.43E-11 | 0.001753 |
| 13July2011 | 5516  | 565.31  | -3.71443 | 3 R.VEDIRDK Splice@chr  | 1.01E-10 | 0.004015 |
| 12Oct2011  | 2656  | 689.39  | -4.47925 | 2 R.NQSASSv chr4@5261   | 6.81E-11 | 0.002374 |
| 12Oct2011  | 7386  | 717.86  | -9.07253 | 2 _WPPANV chr4@4124     | 3.03E-10 | 0.007483 |
| 13July2011 | 5763  | 495.26  | -28.3785 | 3 K.IYK+14.0: chr4@8510 | 6.23E-11 | 0.002497 |
| 12Oct2011  | 7318  | 733.06  | -27.8862 | 3 _KYATFLYf chr1@1336   | 4.48E-10 | 0.007864 |
| 12Oct2011  | 8535  | 802.41  | 12.28004 | 1 K.RDPNGSF chr2@1093   | 1.37E-10 | 0.003387 |
| 12Oct2011  | 2848  | 978.46  | -2.06054 | 1 _SGCVQDI Splice@chr   | 6.89E-11 | 9.85E-04 |
| 12Oct2011  | 7689  | 981.52  | 9.187494 | 2 K.K+14.016 Splice@chr | 8.77E-11 | 0.006094 |
| 12Oct2011  | 2997  | 587.84  | -6.24043 | 2 R.LLEKSKQI Splice@chr | 2.09E-10 | 0.005279 |
| 12Oct2011  | 6205  | 571.64  | -11.2664 | 3 K.NAKKGQI chr2@3467   | 1.49E-10 | 0.009667 |
| 12Oct2011  | 301   | 571.29  | -24.9365 | 2 K.EKYGNFC chr1@1959   | 5.48E-10 | 0.009312 |
| 12Oct2011  | 5374  | 661.42  | 16.17373 | 2 _QLVLTK+ chrX@1080    | 2.12E-10 | 0.008437 |
| 12Oct2011  | 52    | 641.82  | -1.09452 | 2 _WEKCFSF chrX@1276    | 6.72E-11 | 0.003583 |
| 13July2011 | 7026  | 639.65  | -12.525  | 3 R.NLMSQLI chr1@5403   | 2.01E-11 | 7.87E-04 |
| 13July2011 | 6976  | 639.65  | -12.525  | 3 R.NLM+15. chr1@5403   | 2.37E-10 | 0.00417  |
| 13July2011 | 3462  | 514.28  | 12.12936 | 3 R.RK+14.01 chr2@1068  | 7.07E-11 | 0.002856 |
| 13July2011 | 14884 | 839.46  | 7.30759  | 3 _RNNFLET chr3@5841    | 7.67E-11 | 0.001429 |
| 12Oct2011  | 7211  | 1106.54 | 26.98346 | 2 F.EYGVSEN Splice@chr  | 3.58E-10 | 0.007798 |
| 12Oct2011  | 7453  | 1003.5  | 12.96834 | 2 K.KLPELFVE Splice@chr | 3.64E-10 | 0.009563 |
| 13July2011 | 17070 | 992.19  | 4.949193 | 3 K.MGKLSTC chr1@4722   | 4.36E-11 | 0.001102 |
| 13July2011 | 2260  | 527.64  | 26.73432 | 3 R.KSLPLK+1 chr5@1824  | 2.86E-10 | 0.007233 |
| 12Oct2011  | 2600  | 582.82  | -14.6449 | 2 K.KNEKK+1 chr4@2358   | 2.72E-10 | 0.007351 |
| 12Oct2011  | 4009  | 547.3   | -22.4937 | 3 _LLEHPN Splice@chr    | 3.54E-10 | 0.005462 |
| 12Oct2011  | 7271  | 741.42  | -20.6439 | 3 K.ELVRGLR chrX@1678   | 2.09E-10 | 0.006996 |
| 13July2011 | 2293  | 532.26  | 5.361527 | 3 L.SSSSPVIE chr5@2024  | 4.40E-10 | 0.007356 |
| 12Oct2011  | 7840  | 908.82  | -5.64756 | 3 K.YFWNIM chr1@1050    | 7.63E-11 | 0.002393 |
| 13July2011 | 2621  | 538.26  | -18.2903 | 2 K.NSPNCKI chr1@1129   | 7.11E-11 | 0.002406 |
| 12Oct2011  | 2204  | 889.91  | -15.7657 | 2 K.NM+15.9 chrX@5162   | 1.89E-10 | 0.003593 |
| 13July2011 | 635   | 486.8   | -3.32946 | 2 R.KNREKA\ chr3@9236   | 5.88E-11 | 0.001147 |
| 12Oct2011  | 4932  | 674.85  | -3.80425 | 2 K.IIQRQENI chr5@8359  | 1.96E-10 | 0.003895 |
| 13July2011 | 6057  | 515.94  | -25.0242 | 3 K.NPESSK+ chr5@1871   | 5.42E-10 | 0.009215 |
| 13July2011 | 6182  | 515.94  | -25.0242 | 3 K.NPESSK+ chr5@1871   | 1.21E-10 | 0.003923 |
| 12Oct2011  | 13132 | 1062.67 | -26.4448 | 3 K.CKKNRKK chr3@1241   | 2.73E-10 | 0.005119 |

|            |       |         |          |                         |          |          |
|------------|-------|---------|----------|-------------------------|----------|----------|
| 13July2011 | 12702 | 719.37  | -24.5645 | 3 K.FDAQNL chr1@8919    | 3.41E-10 | 0.009055 |
| 12Oct2011  | 5578  | 805.04  | -19.8198 | 3 R.FHND FQI chrX@1198  | 5.17E-11 | 0.001984 |
| 12Oct2011  | 4961  | 948.99  | -20.0004 | 2 R.FNKLAFH chrX@1512   | 2.99E-10 | 0.007563 |
| 12Oct2011  | 1308  | 924.47  | 8.603945 | 1 R.TTPTNFSI chr1@2542  | 1.30E-10 | 0.002687 |
| 13July2011 | 16403 | 828.94  | -16.9274 | 2 K.DLNLVGE chr2@1289   | 6.15E-11 | 0.00121  |
| 12Oct2011  | 996   | 583.3   | -25.3655 | 2 _SRLSIDYS chr5@9297   | 2.33E-10 | 0.005717 |
| 12Oct2011  | 4870  | 934.46  | -20.4427 | 2 K.RLLEFHDI chr4@1098  | 1.71E-10 | 0.004723 |
| 12Oct2011  | 10451 | 901.69  | -21.4696 | 4 K.KCDVSTF chr5@1785   | 1.45E-10 | 0.00275  |
| 12Oct2011  | 8952  | 1006.5  | -9.46939 | 2 K.SRWK+14 chr3@6530   | 4.03E-10 | 0.008181 |
| 12Oct2011  | 11317 | 813.94  | -0.8067  | 4 K.KSAATK+ chr2@1349   | 1.71E-10 | 0.005627 |
| 12Oct2011  | 6222  | 739.4   | 8.518831 | 3 K.FQKNQYI chr4@1445   | 2.46E-10 | 0.004901 |
| 13July2011 | 1116  | 401.74  | 28.10182 | 2 R.VIAGMSF chr1@4338   | 5.36E-10 | 0.009268 |
| 12Oct2011  | 8406  | 908.85  | -18.5554 | 3 R.ENSILQTI chrX@2287  | 7.90E-12 | 0        |
| 13July2011 | 16235 | 1032.21 | -8.42644 | 3 _EDPYRAV Splice@chr   | 3.61E-11 | 0.001724 |
| 13July2011 | 5344  | 862.49  | -11.4066 | 1 _KSNLSVSI chr3@7289   | 5.26E-10 | 0.009055 |
| 12Oct2011  | 3289  | 589.81  | 18.27909 | 4 R.SLCAGRE chrX@8599   | 6.42E-11 | 0.002875 |
| 13July2011 | 7251  | 651.38  | 9.534514 | 2 K.KEAVILEL chrX@1506  | 2.08E-11 | 9.30E-04 |
| 13July2011 | 7437  | 651.38  | 9.534514 | 2 K.KEAVILEL chrX@1506  | 1.38E-10 | 0.004313 |
| 12Oct2011  | 2554  | 579.82  | 0.793409 | 2 K.AGQIEK+ chr4@1202   | 1.65E-10 | 0.007092 |
| 13July2011 | 3261  | 453.24  | -5.67238 | 2 R.VDSSELV chr2@5556   | 1.37E-10 | 0.004171 |
| 12Oct2011  | 13815 | 931.46  | 10.70633 | 1 K.ETEKMHF chr5@1999   | 7.90E-11 | 0.002172 |
| 12Oct2011  | 2537  | 873.93  | -11.7171 | 2 K.TKNCSKF chr3@1260   | 1.04E-10 | 0.002393 |
| 12Oct2011  | 3069  | 590.06  | 9.459977 | 4 K.AK+14.01 Splice@chr | 9.40E-11 | 0.003761 |
| 12Oct2011  | 12289 | 589.8   | 15.96415 | 2 K.KSEIVNYI chrX@8559  | 1.13E-10 | 0.002363 |
| 13July2011 | 7422  | 557.32  | -8.88674 | 2 R.LLIEYIGH chr1@3828  | 1.32E-10 | 0.002279 |
| 13July2011 | 6527  | 557.32  | -8.88674 | 2 R.LLIEYIGH chr1@3828  | 1.26E-10 | 0.00445  |
| 13July2011 | 8783  | 679.42  | -26.9629 | 2 K.CVILKEII chrX@5477  | 2.44E-10 | 0.006046 |
| 12Oct2011  | 942   | 845.46  | -8.7534  | 1 K.ESPVTRR chrX@3828   | 2.14E-10 | 0.003895 |
| 12Oct2011  | 8235  | 508.26  | -11.758  | 3 K.VRHDVIN chr2@5955   | 4.58E-11 | 0.003352 |
| 13July2011 | 10106 | 789.03  | -29.4315 | 3 K.KKMMGI chrX@4266    | 5.69E-10 | 0.009694 |
| 12Oct2011  | 4482  | 544.35  | 2.062025 | 3 K.ILMK+14. Splice@chr | 2.50E-10 | 0.004901 |
| 13July2011 | 13147 | 952.85  | -11.1819 | 3 K.FTSNTAT chr1@6882   | 3.16E-10 | 0.008833 |
| 13July2011 | 5233  | 461.26  | -11.8687 | 2 _LVFCALAI chr4@1472   | 2.14E-10 | 0.005297 |
| 12Oct2011  | 3022  | 623.85  | -28.0257 | 2 K.K+14.016 chr2@1389  | 2.60E-10 | 0.00495  |
| 12Oct2011  | 146   | 467.76  | -9.34966 | 2 R.QLSTTGS chr3@1207   | 3.34E-11 | 0.00121  |
| 12Oct2011  | 2674  | 747.89  | -12.3873 | 2 V.HNCVGK chr5@1411    | 2.46E-10 | 0.007268 |
| 12Oct2011  | 1367  | 747.89  | -12.3873 | 2 V.HNCVGK chr5@1411    | 2.71E-10 | 0.007821 |
| 13July2011 | 14154 | 613.6   | -25.3907 | 4 _FLSIFITVI chr2@1246  | 4.51E-10 | 0.007838 |
| 12Oct2011  | 8013  | 811.96  | -8.01914 | 2 K.YQLWTF chr5@1462    | 2.61E-10 | 0.004791 |
| 12Oct2011  | 1651  | 416.56  | -4.35913 | 3 K.RRCKGSN chr1@1375   | 2.13E-10 | 0.005059 |
| 12Oct2011  | 8963  | 902.42  | 21.21644 | 3 K.NQTPKKC chr3@1016   | 1.33E-10 | 0.002687 |
| 12Oct2011  | 6039  | 671.43  | 28.04107 | 2 K.ELYKTK+1 chr1@1246  | 1.20E-10 | 0.002853 |
| 12Oct2011  | 5313  | 1093.58 | -2.68145 | 1 R.RMELFEII Splice@chr | 3.26E-10 | 0.007819 |
| 12Oct2011  | 4870  | 1093.58 | -2.68145 | 1 R.RMELFEII Splice@chr | 2.73E-10 | 0.007166 |
| 12Oct2011  | 2596  | 547.8   | 7.320107 | 2 K.SRRFWW chr3@4025    | 4.16E-10 | 0.008011 |
| 12Oct2011  | 6785  | 1352.24 | -24.4815 | 2 K.NFQMLLI chr2@5102   | 2.80E-10 | 0.008252 |
| 12Oct2011  | 8695  | 997.01  | -21.0799 | 2 K.CENVVTC Splice@chr  | 2.61E-10 | 0.006665 |

|            |       |         |          |                          |          |          |
|------------|-------|---------|----------|--------------------------|----------|----------|
| 13July2011 | 6141  | 758.41  | -26.1088 | 3 K.IAKKCPM chr4@1327    | 2.73E-10 | 0.005006 |
| 13July2011 | 15328 | 797.9   | 28.06192 | 4 _..MPSREPT Splice@chr  | 2.41E-10 | 0.00592  |
| 12Oct2011  | 2931  | 661.1   | -12.1859 | 4 R.NGRIYGS chr1@1088    | 7.15E-11 | 0.004197 |
| 13July2011 | 772   | 589.81  | 17.0687  | 2 H.NCLTEAT chr1@6485    | 4.78E-11 | 0.001102 |
| 12Oct2011  | 5431  | 1060.05 | -15.0768 | 2 K.NQKIQTN chr3@2550    | 1.91E-10 | 0.008032 |
| 13July2011 | 2625  | 400.72  | -16.3384 | 2 K.LCVPGVR chr2@7704    | 4.88E-10 | 0.008756 |
| 13July2011 | 2375  | 456.3   | 20.93878 | 2 R.RAAAPLR Splice@chr   | 1.53E-10 | 0.002875 |
| 13July2011 | 2430  | 456.3   | 20.93878 | 2 R.RAAAPLR Splice@chr   | 1.37E-10 | 0.002522 |
| 13July2011 | 2248  | 456.3   | 20.93878 | 2 R.RAAAPLR Splice@chr   | 3.28E-10 | 0.008833 |
| 12Oct2011  | 2446  | 702.68  | -18.4193 | 3 _..SLKNMKE chr2@9388   | 4.04E-12 | 6.53E-04 |
| 12Oct2011  | 2911  | 702.35  | -12.1835 | 3 _..SLKNMKE chr2@9388   | 3.89E-11 | 0.001204 |
| 12Oct2011  | 6779  | 738.38  | 4.966457 | 3 R.IFSRPSFE chr1@1199   | 1.25E-10 | 0.002043 |
| 12Oct2011  | 11126 | 1187.08 | -3.06225 | 2 H.YYFESKFI chr2@9687   | 9.42E-11 | 0.001388 |
| 12Oct2011  | 11397 | 1187.08 | -3.06225 | 2 H.YYFESKFI chr2@9687   | 2.59E-10 | 0.00593  |
| 12Oct2011  | 8380  | 1187.08 | -3.06225 | 2 H.YYFESKFI chr2@9687   | 2.63E-10 | 0.007166 |
| 13July2011 | 7488  | 539.77  | -22.1849 | 4 R.IQRSSFIS Splice@chr  | 1.02E-10 | 0.001519 |
| 12Oct2011  | 1992  | 921.51  | 1.529046 | 1 K.SIETTKNK chr5@1285   | 1.27E-10 | 0.002363 |
| 12Oct2011  | 9757  | 1016.55 | -10.7322 | 2 T.RGK+14.( chrX@9637   | 1.89E-10 | 0.002836 |
| 12Oct2011  | 10381 | 1052    | -9.87246 | 2 R.RRVGM+ chr3@4600     | 4.62E-13 | 0        |
| 12Oct2011  | 959   | 430.72  | -18.1804 | 2 R.VGDVES\ chr4@9840    | 4.15E-10 | 0.00589  |
| 13July2011 | 12601 | 687.39  | -20.016  | 3 K.NKMDK+ chr4@8641     | 5.99E-11 | 0.002423 |
| 13July2011 | 2500  | 477.75  | 3.584727 | 4 R.FRIDCEGI chr5@1405   | 3.60E-10 | 0.00941  |
| 12Oct2011  | 9211  | 534.47  | -23.7827 | 5 _..KQTQNSI chr4@4051   | 6.40E-11 | 0.001717 |
| 12Oct2011  | 8657  | 1122.05 | -29.0576 | 2 K.LM+15.9\ chrX@1700   | 2.96E-10 | 0.005491 |
| 12Oct2011  | 35    | 475.28  | 27.63675 | 2 R.KLSDRSSI chr2@1177   | 3.29E-10 | 0.008032 |
| 12Oct2011  | 85    | 475.28  | 27.63675 | 2 R.KLSDRSSI chr2@1177   | 3.68E-10 | 0.008764 |
| 12Oct2011  | 7605  | 515.62  | 14.07456 | 3 _..QNLSLFF\ Splice@chr | 2.15E-10 | 0.003144 |
| 12Oct2011  | 2605  | 603.82  | 14.07405 | 2 R.QISKNCSI chr5@1734   | 2.59E-10 | 0.00755  |
| 12Oct2011  | 561   | 584.31  | -25.0077 | 2 R.QIELFFD\ chr2@1504   | 5.21E-10 | 0.009082 |
| 12Oct2011  | 625   | 422.73  | 29.09124 | 2 R.ATAGRSC chr1@1420    | 1.21E-10 | 0.003779 |
| 12Oct2011  | 529   | 422.72  | 5.355105 | 2 R.ATAGRSC chr1@1420    | 6.65E-11 | 0.003055 |
| 13July2011 | 6068  | 579.53  | -27.942  | 4 L.K+14.016 chr5@8105   | 3.83E-10 | 0.009934 |
| 12Oct2011  | 4131  | 420.22  | -0.24114 | 3 K.NTASFIC\ chr4@1604   | 5.54E-10 | 0.009077 |
| 13July2011 | 8770  | 564.66  | 11.76712 | 3 K.PEIEISIKI Splice@chr | 1.10E-10 | 0.004302 |
| 12Oct2011  | 6300  | 684.36  | -14.8264 | 2 R.TK+14.01 chr4@3022   | 9.95E-11 | 0.002363 |
| 12Oct2011  | 3828  | 600.38  | -26.4756 | 2 R.INLRSTK+ Splice@chr  | 1.16E-10 | 0.002948 |
| 13July2011 | 15204 | 937.14  | 7.389308 | 3 K.NIKSQDF chr3@1372    | 4.36E-10 | 0.007356 |
| 13July2011 | 6929  | 647.84  | -9.24721 | 4 K.K+14.016 chr3@1227   | 2.94E-10 | 0.005006 |
| 12Oct2011  | 4524  | 736.72  | -19.4479 | 3 K.RRTRLAS\ chr5@1465   | 2.11E-10 | 0.0068   |
| 13July2011 | 3580  | 475.76  | -24.1924 | 2 K.ISSVLSSTI chr5@1092  | 2.71E-10 | 0.006109 |
| 13July2011 | 6506  | 645.65  | -24.8057 | 3 V.FLGTARE chr1@1407    | 4.31E-10 | 0.007919 |
| 12Oct2011  | 3242  | 468.61  | -27.3231 | 3 K.KNFPK+1 chr1@1136    | 2.20E-10 | 0.007431 |
| 12Oct2011  | 7094  | 858.94  | -20.9865 | 2 R.SREMSVT Splice@chr   | 8.96E-11 | 0.004228 |
| 12Oct2011  | 3314  | 573.31  | 1.601916 | 3 R.SREMSVT Splice@chr   | 4.92E-11 | 0.001025 |
| 12Oct2011  | 4016  | 547.3   | 28.57507 | 2 R.IIFDDNID chrX@1017   | 2.36E-10 | 0.007014 |
| 12Oct2011  | 4007  | 753.48  | -4.17865 | 2 R.IKK+14.0 chrX@8874   | 1.32E-10 | 0.004646 |
| 12Oct2011  | 10166 | 712.14  | 6.351323 | 4 R.DRPRPGF chr2@1344    | 1.39E-10 | 0.003718 |

|            |       |         |          |                         |          |          |
|------------|-------|---------|----------|-------------------------|----------|----------|
| 12Oct2011  | 8407  | 868.47  | -10.6745 | 3 R.IFM+15.5 chrX@1959  | 2.89E-10 | 0.008785 |
| 12Oct2011  | 8685  | 1143.1  | -21.251  | 2 R.HVDLKA chr4@1150    | 2.06E-10 | 0.005059 |
| 12Oct2011  | 5444  | 739.05  | -6.25937 | 3 R.FGK+14.C chrX@8354  | 3.05E-10 | 0.009782 |
| 12Oct2011  | 1518  | 928.97  | -28.6578 | 2 K.LFRNQFK chr1@1084   | 1.51E-10 | 0.004723 |
| 13July2011 | 6394  | 520.63  | -29.0511 | 3 K.LIIGNKKA chr5@9589  | 4.18E-10 | 0.006884 |
| 12Oct2011  | 127   | 779.42  | -1.80342 | 2 K.KQQQQC chr2@7657    | 5.19E-11 | 5.02E-04 |
| 12Oct2011  | 4921  | 774.39  | -16.8886 | 4 N.DGVEIHS chr1@1231   | 1.67E-10 | 0.004521 |
| 12Oct2011  | 5839  | 655.42  | -25.5545 | 2 R.RTVKRVP chr2@1102   | 2.66E-10 | 0.007794 |
| 13July2011 | 12041 | 627.71  | -25.5807 | 3 _IFRLINLK- chrX@3686  | 1.91E-10 | 0.003166 |
| 13July2011 | 3027  | 587.39  | -9.68006 | 2 K.KTIFPKK+ chr1@1002  | 4.62E-11 | 0.00191  |
| 12Oct2011  | 3897  | 494.28  | 20.12801 | 3 K.LLILYASCI chr3@1335 | 5.67E-11 | 7.08E-04 |
| 12Oct2011  | 2341  | 431.24  | -16.6419 | 4 R.NFFFKFLI chr5@1902  | 3.20E-10 | 0.005491 |
| 13July2011 | 7362  | 586.28  | -20.6117 | 2 K.TCKFPFTI chr1@3941  | 1.63E-11 | 4.77E-04 |
| 12Oct2011  | 10452 | 874.99  | 8.351457 | 2 K.REK+14.C chr2@4560  | 2.62E-10 | 0.007756 |
| 13July2011 | 13714 | 903.46  | -2.33343 | 2 K.M+15.99 chr4@1340   | 2.93E-10 | 0.008267 |
| 13July2011 | 3486  | 499.24  | -1.53129 | 2 K.SSTCSKA` Splice@chr | 1.55E-10 | 0.002875 |
| 12Oct2011  | 5665  | 655.32  | -29.6004 | 3 R.KYNSSCK chr4@5752   | 5.83E-10 | 0.007319 |
| 13July2011 | 1959  | 447.22  | 8.275564 | 4 K.LRCAGW chr2@6954    | 2.09E-11 | 0.001005 |
| 13July2011 | 14629 | 795.4   | -15.9041 | 2 K.ETENAAL Splice@chr  | 2.19E-10 | 0.006146 |
| 12Oct2011  | 12235 | 1028    | -28.1525 | 2 R.NEKERNC Splice@chr  | 7.00E-11 | 0.002172 |
| 13July2011 | 4633  | 474.5   | -10.5056 | 4 K.FFFSKTIFI chr5@2007 | 3.84E-10 | 0.00901  |
| 13July2011 | 3802  | 728.71  | 2.602274 | 3 K.TPSEQQA chr1@1348   | 4.99E-13 | 0        |
| 13July2011 | 3383  | 728.71  | 2.602274 | 3 K.TPSEQQA chr1@1348   | 3.17E-11 | 5.62E-04 |
| 13July2011 | 3785  | 728.71  | 2.602274 | 3 K.TPSEQQA chr1@1348   | 2.70E-11 | 0.001388 |
| 13July2011 | 3324  | 728.71  | 2.602274 | 3 K.TPSEQQA chr1@1348   | 8.63E-15 | 0        |
| 12Oct2011  | 9099  | 876     | -7.3621  | 2 K.IKK+14.0 chr1@1468  | 2.08E-10 | 0.004389 |
| 12Oct2011  | 13157 | 912     | 8.950493 | 2 K.QFLKHKE Splice@chr  | 3.80E-10 | 0.009212 |
| 13July2011 | 16520 | 775.97  | -1.41766 | 2 R.LLQK+14 chr1@5141   | 4.14E-10 | 0.007595 |
| 13July2011 | 16158 | 775.98  | 11.49878 | 2 R.LLQK+14 chr1@5141   | 1.15E-10 | 0.003891 |
| 13July2011 | 15910 | 775.97  | -1.41766 | 2 R.LLQK+14 chr1@5141   | 3.83E-10 | 0.005913 |
| 12Oct2011  | 4069  | 456.26  | 11.70882 | 3 R.LLFTK+14 Splice@chr | 4.02E-10 | 0.009353 |
| 13July2011 | 9677  | 693.36  | -3.26231 | 3 K.KVGYDEK chr2@1201   | 2.83E-10 | 0.005153 |
| 12Oct2011  | 2322  | 664.67  | 3.098878 | 3 R.LEQSESS\ Splice@chr | 1.32E-10 | 0.006042 |
| 12Oct2011  | 14186 | 974.01  | 8.970284 | 2 T.CLPIIM+1 chr5@1627  | 3.52E-10 | 0.008632 |
| 13July2011 | 16398 | 646.67  | -27.7914 | 3 R.TNSLSSIS chrX@1119  | 3.80E-10 | 0.007033 |
| 12Oct2011  | 8702  | 633.9   | 26.39924 | 2 _KLVGHGK chr5@1029    | 6.82E-10 | 0.008776 |
| 12Oct2011  | 8357  | 472.51  | 0.129448 | 4 R.KVPTTGF Splice@chr  | 1.96E-10 | 0.004708 |
| 12Oct2011  | 8765  | 967.61  | -8.93833 | 2 K.LGKKKK+ chr4@3099   | 1.23E-10 | 0.004015 |
| 12Oct2011  | 8403  | 1151.09 | -14.0104 | 2 _KKSFW Splice@chr     | 2.18E-10 | 0.005059 |
| 12Oct2011  | 4920  | 1151.08 | -22.7138 | 2 _KKSFW Splice@chr     | 1.16E-10 | 0.004184 |
| 12Oct2011  | 5608  | 599.89  | -21.6729 | 2 R.KLIKVRV\ chr2@4438  | 4.30E-10 | 0.008178 |
| 13July2011 | 7740  | 574.32  | -23.3861 | 2 R.KLGEVGN chr2@1139   | 2.57E-10 | 0.004342 |
| 12Oct2011  | 9438  | 1221.6  | -4.65247 | 1 K.NLQTNPI chr5@9573   | 1.13E-10 | 0.005901 |
| 12Oct2011  | 2435  | 913.97  | -28.6795 | 2 K.PK+14.01 chr1@2857  | 1.39E-10 | 0.002604 |
| 12Oct2011  | 1333  | 1165.52 | -13.6895 | 1 K.EKNEYYY chr5@1287   | 6.04E-11 | 0.001807 |
| 13July2011 | 1896  | 646.85  | 24.26157 | 2 K.EKLEFYTA chr3@7495  | 8.77E-11 | 0.001519 |
| 12Oct2011  | 6910  | 859.45  | 16.63765 | 2 K.KIWK+14 chr4@9694   | 3.69E-10 | 0.009427 |

|            |       |         |          |                         |          |          |
|------------|-------|---------|----------|-------------------------|----------|----------|
| 13July2011 | 3640  | 429.76  | 28.50773 | 2 R.ILNASSPF chr5@2016  | 3.10E-10 | 0.007356 |
| 12Oct2011  | 8769  | 1035.53 | -19.0725 | 1 R.GCMRRR chr2@2908    | 2.17E-10 | 0.006179 |
| 13July2011 | 1234  | 516.57  | -12.1211 | 3 K.EQEEEEEE chr1@1070  | 1.30E-10 | 0.004171 |
| 13July2011 | 1186  | 516.57  | -12.1211 | 3 K.EQEEEEEE chr1@1070  | 1.72E-10 | 0.004803 |
| 13July2011 | 4881  | 839.42  | -1.85619 | 2 V.M+15.99 chrX@5175   | 1.33E-10 | 0.002279 |
| 12Oct2011  | 575   | 472.29  | -25.0377 | 3 _ .KRFGGVL chrX@7604  | 3.13E-10 | 0.005491 |
| 13July2011 | 154   | 402.23  | 28.59996 | 3 K.IIMDFNIN chr2@9334  | 5.33E-11 | 0.00121  |
| 12Oct2011  | 4934  | 1354.12 | 1.647821 | 2 K.EKYEGAE Splice@chr  | 1.69E-10 | 0.004178 |
| 12Oct2011  | 4927  | 903.08  | -1.24012 | 3 K.EKYEGAE Splice@chr  | 2.52E-12 | 0        |
| 12Oct2011  | 4898  | 1354.12 | 1.647821 | 2 K.EKYEGAE Splice@chr  | 3.97E-11 | 5.02E-04 |
| 12Oct2011  | 4892  | 903.08  | -1.24012 | 3 K.EKYEGAE Splice@chr  | 3.45E-10 | 0.008014 |
| 12Oct2011  | 1791  | 1354.13 | 9.048164 | 2 K.EKYEGAE Splice@chr  | 1.39E-12 | 0        |
| 12Oct2011  | 3378  | 1354.13 | 9.048164 | 2 K.EKYEGAE Splice@chr  | 2.67E-11 | 9.25E-04 |
| 12Oct2011  | 4685  | 1354.13 | 9.048164 | 2 K.EKYEGAE Splice@chr  | 1.05E-10 | 0.002586 |
| 12Oct2011  | 5499  | 1354.13 | 9.048164 | 2 K.EKYEGAE Splice@chr  | 1.51E-14 | 0        |
| 12Oct2011  | 5752  | 1354.13 | 9.048164 | 2 K.EKYEGAE Splice@chr  | 2.66E-12 | 0        |
| 12Oct2011  | 6056  | 903.08  | -1.24012 | 3 K.EKYEGAE Splice@chr  | 2.12E-11 | 3.79E-04 |
| 12Oct2011  | 4482  | 1354.13 | 9.048164 | 2 K.EKYEGAE Splice@chr  | 6.92E-13 | 0        |
| 13July2011 | 10060 | 892.44  | -6.98375 | 1 _ .MAPDFRI chr4@5207  | 7.62E-11 | 0.002903 |
| 12Oct2011  | 6779  | 637.34  | 4.319684 | 3 _ .M+15.99 Splice@chr | 4.69E-10 | 0.007588 |
| 13July2011 | 15288 | 899.48  | 23.23334 | 4 K.K+14.016 chr4@1330  | 3.20E-11 | 0.001673 |
| 12Oct2011  | 10278 | 1005.63 | -4.28423 | 2 F.K+14.016 chrX@3325  | 3.62E-10 | 0.007798 |
| 12Oct2011  | 8264  | 702.36  | 14.35933 | 2 R.VQK+14.1 chr3@7657  | 1.30E-10 | 0.002861 |
| 13July2011 | 9404  | 555.32  | -20.8823 | 2 _ .FVPGIPLT chr2@1311 | 8.85E-11 | 0.003226 |
| 12Oct2011  | 8726  | 1181.6  | 7.991828 | 2 K.TETLKM+ chr5@1518   | 2.32E-10 | 0.004085 |
| 13July2011 | 22    | 485.26  | 24.53639 | 3 K.ENIEKQPI chr4@1242  | 1.05E-10 | 0.00365  |
| 12Oct2011  | 7716  | 1122.05 | 16.98713 | 2 _ .NTLKFDS Splice@chr | 4.09E-10 | 0.008181 |
| 12Oct2011  | 8841  | 1122.55 | 15.49083 | 2 _ .NTLKFDS Splice@chr | 1.02E-10 | 0.001861 |
| 13July2011 | 5153  | 577.79  | -12.2309 | 2 _ .WMADY\ chr3@7612   | 3.36E-10 | 0.009242 |
| 13July2011 | 8250  | 574.8   | 1.730232 | 4 K.TK+14.01 chr5@4987  | 2.54E-10 | 0.005884 |
| 12Oct2011  | 3195  | 793.89  | -11.0079 | 2 T.MFYVNAI chr3@8328   | 3.46E-10 | 0.00716  |
| 13July2011 | 16315 | 736.38  | -2.07494 | 3 K.FPFSVLCT chrX@4791  | 2.74E-10 | 0.005006 |
| 12Oct2011  | 8973  | 1090.01 | -22.9603 | 2 K.M+15.99 chr2@9257   | 1.86E-10 | 0.008713 |
| 12Oct2011  | 4227  | 638.7   | 19.50519 | 3 K.IPK+14.0 chr1@5790  | 2.20E-10 | 0.007651 |
| 13July2011 | 14942 | 1089.91 | -25.099  | 3 R.QMTTLKt chr2@1014   | 2.04E-10 | 0.007578 |
| 12Oct2011  | 3367  | 627.31  | 12.63218 | 2 _ .KQGISCFl chr5@5035 | 2.27E-10 | 0.006842 |
| 12Oct2011  | 644   | 817.39  | -19.5875 | 2 R.LCCTSLAI chr1@6521  | 2.44E-10 | 0.007328 |
| 13July2011 | 2878  | 643.42  | 15.54808 | 2 K.KGKK+14 chr2@1155   | 3.47E-10 | 0.008931 |
| 12Oct2011  | 32    | 630.83  | 1.550539 | 2 K.RTYHWM Splice@chr   | 4.29E-10 | 0.009924 |
| 13July2011 | 5876  | 420.56  | 3.782414 | 3 K.NPGKKSC chr4@9965   | 1.24E-12 | 2.08E-04 |
| 12Oct2011  | 7674  | 495.31  | -0.24695 | 3 R.IGLLK+14 chr3@8991  | 2.09E-10 | 0.006376 |
| 13July2011 | 9084  | 805.43  | 0.227624 | 2 R.QISTCKSS Splice@chr | 5.68E-11 | 0.002406 |
| 13July2011 | 11748 | 484.28  | 10.44055 | 3 K.ISSAIAMf chr4@7544  | 2.36E-10 | 0.004135 |
| 12Oct2011  | 4809  | 877.56  | 7.58983  | 2 K.KQKK+14 Splice@chr  | 1.27E-10 | 0.003387 |
| 12Oct2011  | 12381 | 1052    | -20.4416 | 2 R.CFWFGRI chr5@1291   | 2.78E-10 | 0.005055 |
| 12Oct2011  | 4847  | 538.29  | 9.996884 | 3 K.FTEIK+14 chr5@1281  | 1.72E-10 | 0.006385 |
| 12Oct2011  | 8187  | 538.29  | 9.996884 | 3 K.FTEIK+14 chr5@1281  | 4.67E-10 | 0.007588 |

|            |       |         |          |                          |          |          |
|------------|-------|---------|----------|--------------------------|----------|----------|
| 12Oct2011  | 6809  | 988.52  | 4.944583 | 3 K.ILTSELSL chr1@1257   | 1.23E-10 | 0.003388 |
| 12Oct2011  | 9345  | 1090.55 | 7.842733 | 2 K.QLKFFEM chr1@2090    | 5.15E-10 | 0.009082 |
| 12Oct2011  | 10993 | 744.74  | -7.33118 | 3 _.MK+14.0 Splice@chr   | 4.56E-10 | 0.009591 |
| 13July2011 | 3216  | 501.27  | -9.82141 | 2 K.EIFHSAA\ Splice@chr  | 2.60E-10 | 0.006518 |
| 13July2011 | 3052  | 501.27  | -9.82141 | 2 K.EIFHSAA\ Splice@chr  | 2.93E-10 | 0.005006 |
| 13July2011 | 3112  | 501.27  | -9.82141 | 2 K.EIFHSAA\ Splice@chr  | 3.84E-10 | 0.005913 |
| 13July2011 | 15947 | 1082.07 | 20.89009 | 2 K.YFKINILEI chr2@1186  | 9.50E-11 | 0.003519 |
| 12Oct2011  | 5135  | 642.41  | 13.13211 | 2 K.FRLQPKP chr2@3434    | 4.58E-10 | 0.009819 |
| 12Oct2011  | 46    | 559.8   | -3.38602 | 2 S.QPAQVLC chr5@1801    | 3.14E-10 | 0.005491 |
| 12Oct2011  | 8980  | 1105.9  | 11.93216 | 3 K.LNEKRLP\ chr5@3126   | 1.93E-10 | 0.006651 |
| 12Oct2011  | 7733  | 633.9   | 29.39137 | 2 R.K+14.016 chr5@2465   | 4.58E-10 | 0.007864 |
| 12Oct2011  | 13551 | 914.16  | -24.6857 | 3 K.GLKVVSS chr2@4979    | 2.47E-11 | 3.79E-04 |
| 12Oct2011  | 2729  | 951.5   | -27.6756 | 1 R.KTAIESFR Splice@chr  | 1.59E-10 | 0.003161 |
| 12Oct2011  | 1089  | 951.5   | -27.6756 | 1 R.KTAIESFR Splice@chr  | 1.86E-10 | 0.006877 |
| 12Oct2011  | 6397  | 689.1   | -5.14469 | 4 _.LK+14.01 Splice@chr  | 1.37E-10 | 0.004521 |
| 12Oct2011  | 7854  | 689.1   | -5.14469 | 4 _.LK+14.01 Splice@chr  | 1.47E-10 | 0.004723 |
| 12Oct2011  | 4645  | 1168.61 | 16.5872  | 1 K.QDFLCLFI chr3@1306   | 1.53E-10 | 0.005258 |
| 12Oct2011  | 5051  | 667.34  | -16.2127 | 2 K.EIQIFCEK chr1@1268   | 2.78E-10 | 0.007401 |
| 12Oct2011  | 6278  | 939.59  | -11.1849 | 2 R.K+14.016 chr1@1142   | 3.75E-10 | 0.009808 |
| 12Oct2011  | 10029 | 1134.61 | 15.38621 | 3 C.SK+14.01 chr4@4494   | 7.28E-11 | 0.001361 |
| 13July2011 | 6223  | 531.76  | -22.079  | 4 R.RK+14.01 chr1@9445   | 1.48E-10 | 0.00472  |
| 12Oct2011  | 5494  | 432.25  | -16.512  | 3 _.MSLLQIH chr3@2260    | 3.27E-10 | 0.009898 |
| 12Oct2011  | 271   | 593.82  | -17.2581 | 2 K.KFQNHQ\ Splice@chr   | 1.67E-10 | 0.003363 |
| 12Oct2011  | 1045  | 1311.61 | -25.1473 | 2 K.PSTFSAPI chr5@6626   | 2.79E-10 | 0.008227 |
| 13July2011 | 4684  | 463.74  | -28.7537 | 2 _.FLVFESGI chr5@1959   | 3.82E-10 | 0.00901  |
| 13July2011 | 848   | 562.31  | -13.4391 | 2 R.FYLLLYLK Splice@chr  | 5.91E-11 | 0.001597 |
| 13July2011 | 11555 | 685.88  | 4.188613 | 2 K.IVPGGGA chrX@1570    | 1.00E-18 | 0        |
| 13July2011 | 7599  | 475.24  | 2.745674 | 3 K.IGM+15.5 chr3@1802   | 2.45E-10 | 0.005634 |
| 13July2011 | 11921 | 858.48  | 6.006088 | 3 _.LETGIKPI\ Splice@chr | 3.45E-14 | 0        |
| 13July2011 | 9211  | 515.62  | 14.07456 | 3 _.QNLSLFF\ Splice@chr  | 5.15E-11 | 0.001474 |
| 13July2011 | 10923 | 660.37  | -16.199  | 2 K.TK+14.01 chr1@1424   | 4.17E-10 | 0.00944  |
| 13July2011 | 11390 | 883.48  | 8.755494 | 2 N.RRAFGV\ Splice@chr   | 3.90E-10 | 0.009122 |
| 13July2011 | 11611 | 685.88  | 4.188613 | 2 K.IVPGGGA chrX@1570    | 7.81E-19 | 0        |
| 13July2011 | 11615 | 457.59  | 5.792762 | 3 K.IVPGGGA chrX@1570    | 8.25E-14 | 0        |
| 13July2011 | 16889 | 795.66  | -10.8901 | 4 K.SGTIFDNI Splice@chr  | 4.29E-10 | 0.009544 |
| 13July2011 | 16747 | 1074.07 | 18.6568  | 2 K.YFKINILEI chr2@1186  | 4.04E-10 | 0.009347 |
| 13July2011 | 16855 | 795.66  | -2.97654 | 4 K.SGTIFDNI Splice@chr  | 1.34E-12 | 0        |
| 13July2011 | 11869 | 858.48  | 6.006088 | 3 _.LETGIKPI\ Splice@chr | 2.21E-12 | 1.81E-04 |
| 13July2011 | 10867 | 660.37  | -16.199  | 2 K.TK+14.01 chr1@1424   | 3.60E-10 | 0.008668 |
| 13July2011 | 9791  | 800.92  | -7.85908 | 2 V.ENLNFRC chr2@1407    | 1.22E-10 | 0.003022 |
| 13July2011 | 5155  | 696.83  | -11.9803 | 2 R.TDRTEVS chr1@1452    | 3.43E-10 | 0.008062 |
| 13July2011 | 2056  | 400.72  | 7.024146 | 2 _.SDAVPGV\ Splice@chr  | 7.29E-11 | 0.002002 |
| 13July2011 | 12971 | 763.48  | -1.96108 | 2 K.EKSLKIKIF chr1@3515  | 2.84E-10 | 0.006483 |
| 13July2011 | 406   | 531.28  | 8.35486  | 2 L.RADHTHF chr3@8398    | 1.16E-10 | 0.0029   |
| 13July2011 | 3695  | 793.42  | 19.33353 | 2 R.NEKYSTV Splice@chr   | 2.13E-10 | 0.004888 |
| 13July2011 | 11262 | 484.28  | 10.44055 | 3 K.ISSAIAMF chr4@7544   | 1.23E-10 | 0.003022 |
| 13July2011 | 12161 | 858.48  | 6.006088 | 3 _.LETGIKPI\ Splice@chr | 4.12E-12 | 3.25E-04 |

|            |       |         |          |                         |          |          |
|------------|-------|---------|----------|-------------------------|----------|----------|
| 13July2011 | 16578 | 787.88  | 12.22608 | 2 K.FWREIQM chrX@1650   | 2.70E-10 | 0.006223 |
| 13July2011 | 1388  | 530.76  | -26.2682 | 2 L.RADHTHF chr3@8398   | 9.10E-12 | 3.25E-04 |
| 13July2011 | 11867 | 685.88  | 4.188613 | 2 K.IVPGGGA chrX@1570   | 2.99E-17 | 0        |
| 13July2011 | 12515 | 515.29  | -6.17134 | 3 K.PNFTVILS chr4@1642  | 1.87E-10 | 0.004153 |
| 13July2011 | 13584 | 474.28  | -15.3895 | 3 _RCTIVLFL Splice@chr  | 3.02E-10 | 0.006711 |
| 13July2011 | 1692  | 409.74  | -10.6768 | 2 K.MVITNLK Splice@chr  | 3.68E-10 | 0.008171 |
| 13July2011 | 2845  | 400.72  | -16.3384 | 2 K.LCVPGVR chr2@7704   | 4.06E-10 | 0.008734 |
| 13July2011 | 11563 | 484.28  | 10.44055 | 3 K.ISSAIAMF chr4@7544  | 4.69E-10 | 0.009247 |
| 13July2011 | 12055 | 858.48  | 6.006088 | 3 _LETGIKPI Splice@chr  | 1.04E-12 | 0        |
| 13July2011 | 17283 | 795.66  | -2.97654 | 4 K.SGTIFDNI Splice@chr | 9.32E-11 | 0.002262 |
| 13July2011 | 10273 | 800.93  | 4.654405 | 2 V.ENLNFRC chr2@1407   | 1.18E-10 | 0.002767 |
| 13July2011 | 2188  | 412.23  | 25.3069  | 2 R.IASYQGG chrX@1679   | 4.16E-10 | 0.008823 |
| 13July2011 | 9064  | 897.42  | -27.6753 | 3 _QVREMH Splice@chr    | 4.65E-10 | 0.009134 |
| 13July2011 | 1387  | 562.31  | -13.4391 | 2 R.FYLLLYK Splice@chr  | 5.92E-11 | 0.001329 |
| 13July2011 | 737   | 531.27  | -10.5398 | 2 L.RADHTHF chr3@8398   | 4.71E-10 | 0.009247 |
| 13July2011 | 8841  | 472.29  | -0.64754 | 2 _SPLFVPKf chrX@4402   | 1.30E-10 | 0.002767 |
| 13July2011 | 8898  | 472.29  | -0.64754 | 2 _SPLFVPKf chrX@4402   | 1.30E-10 | 0.002767 |
| 13July2011 | 5722  | 696.83  | -11.9803 | 2 R.TDRTEVS chr1@1452   | 2.15E-10 | 0.005038 |
| 13July2011 | 17371 | 795.66  | -10.8901 | 4 K.SGTIFDNI Splice@chr | 1.12E-10 | 0.002659 |
| 13July2011 | 13246 | 763.48  | -1.96108 | 2 K.EKSLKIKf chr1@3515  | 2.11E-10 | 0.00467  |
| 13July2011 | 17274 | 791.91  | -4.93896 | 4 K.SGTIFDNI Splice@chr | 5.03E-12 | 3.25E-04 |
| 13July2011 | 15255 | 665.37  | -26.6417 | 2 Q.INNK+14 Splice@chr  | 1.71E-10 | 0.003646 |
| 13July2011 | 11815 | 686.38  | 1.739395 | 2 K.IVPGGGA chrX@1570   | 1.81E-17 | 0        |
| 13July2011 | 2679  | 400.73  | 8.70363  | 2 K.LCVPGVR chr2@7704   | 2.62E-10 | 0.006019 |
| 13July2011 | 6818  | 717.42  | -20.7021 | 2 _KLDLYEL chrX@2081    | 2.16E-10 | 0.005038 |
| 13July2011 | 680   | 531.27  | -10.5398 | 2 L.RADHTHF chr3@8398   | 5.59E-11 | 0.001329 |
| 13July2011 | 12043 | 685.88  | 4.188613 | 2 K.IVPGGGA chrX@1570   | 4.53E-19 | 0        |
| 13July2011 | 4666  | 417.21  | -4.25277 | 2 K.WAKDGE chr5@1945    | 4.28E-11 | 9.91E-04 |
| 13July2011 | 11766 | 484.28  | 10.44055 | 3 K.ISSAIAMF chr4@7544  | 2.92E-10 | 0.005485 |
| 13July2011 | 11707 | 484.28  | 10.44055 | 3 K.ISSAIAMF Splice@chr | 9.98E-12 | 0        |
| 13July2011 | 3497  | 454.75  | 8.810814 | 2 K.TDLAYLG chr4@1545   | 1.21E-10 | 0.002341 |
| 13July2011 | 6827  | 593.84  | -9.57474 | 2 R.NEIVFQV chrX@1474   | 2.02E-10 | 0.004274 |
| 13July2011 | 743   | 562.31  | -13.4391 | 2 R.FYLLLYK Splice@chr  | 1.83E-10 | 0.003538 |
| 13July2011 | 786   | 530.77  | -7.37354 | 2 L.RADHTHF chr3@8398   | 2.54E-10 | 0.004936 |
| 13July2011 | 8450  | 574.8   | 1.730232 | 4 K.TK+14.01 chr5@4987  | 7.81E-11 | 0.001344 |
| 13July2011 | 12103 | 685.88  | 4.188613 | 2 K.IVPGGGA chrX@1570   | 1.00E-18 | 0        |
| 13July2011 | 17853 | 795.66  | -10.8901 | 4 K.SGTIFDNI Splice@chr | 4.70E-11 | 0.001098 |
| 13July2011 | 1823  | 400.72  | 7.024146 | 2 _SDAVPGV Splice@chr   | 2.25E-11 | 2.94E-04 |
| 13July2011 | 11892 | 1134.06 | -5.36126 | 2 _IPSAVGY Splice@chr   | 4.83E-18 | 0        |
| 13July2011 | 2444  | 526.78  | -3.83085 | 2 K.KLDLNM chr2@7182    | 2.19E-11 | 2.94E-04 |
| 13July2011 | 1603  | 418.22  | 1.024051 | 2 _YEPGKNK chr1@1810    | 3.82E-10 | 0.007437 |
| 13July2011 | 12522 | 858.48  | 6.006088 | 3 _LETGIKPI Splice@chr  | 2.80E-13 | 0        |
| 13July2011 | 17741 | 792.16  | -5.99938 | 4 K.SGTIFDNI Splice@chr | 1.75E-13 | 0        |
| 13July2011 | 14658 | 1096.25 | 17.78349 | 3 K.VSNVLTN Splice@chr  | 3.88E-10 | 0.007667 |
| 13July2011 | 2235  | 433.76  | 2.609238 | 2 _IVDLP GPI chr3@1104  | 2.86E-11 | 7.15E-04 |
| 13July2011 | 680   | 562.31  | -13.4391 | 2 R.FYLLLYK Splice@chr  | 5.07E-11 | 0.001098 |
| 13July2011 | 534   | 452.23  | -1.48793 | 2 R.SGEPLSA Splice@chr  | 2.73E-11 | 5.85E-04 |

|            |       |         |          |                          |          |          |
|------------|-------|---------|----------|--------------------------|----------|----------|
| 13July2011 | 11832 | 1134.06 | -5.36126 | 2 _IPSAVGY( Splice@chr   | 5.09E-18 | 0        |
| 13July2011 | 4197  | 665.02  | -27.3298 | 3 _K+14.016 chr2@9901    | 3.67E-10 | 0.006854 |
| 13July2011 | 6605  | 509.8   | -23.773  | 2 R.SSVIMLIV chr2@5767   | 4.31E-10 | 0.008924 |
| 13July2011 | 7448  | 703.87  | 11.02855 | 2 Y.VVQVAID chr1@1045    | 1.07E-14 | 0        |
| 13July2011 | 11877 | 756.37  | -13.3372 | 3 _IPSAVGY( Splice@chr   | 1.06E-10 | 0.001962 |
| 13July2011 | 2698  | 499.24  | -1.53129 | 2 K.SSTCSKA( Splice@chr  | 3.81E-10 | 0.007318 |
| 13July2011 | 9811  | 671.37  | -24.0361 | 2 T.FNIVHTQ Splice@chr   | 1.98E-10 | 0.004027 |
| 13July2011 | 12464 | 858.48  | 6.006088 | 3 _LETGIKPI( Splice@chr  | 4.26E-13 | 0        |
| 13July2011 | 11241 | 660.37  | -16.199  | 2 K.TK+14.01 chr1@1424   | 3.84E-10 | 0.007551 |
| 13July2011 | 6707  | 626.68  | 23.52414 | 3 R.VVDALGI( Splice@chr  | 4.80E-12 | 0        |
| 13July2011 | 12372 | 555.63  | -25.3104 | 3 R.YFK+14.0 chr1@1628   | 2.59E-10 | 0.004936 |
| 13July2011 | 17811 | 795.66  | -2.97654 | 4 K.SGTIFDNI( Splice@chr | 1.45E-10 | 0.002806 |
| 13July2011 | 9870  | 671.37  | -24.0361 | 2 T.FNIVHTQ Splice@chr   | 4.42E-10 | 0.009267 |
| 13July2011 | 422   | 452.23  | -1.48793 | 2 R.SGEPLSA( Splice@chr  | 3.85E-11 | 8.53E-04 |
| 13July2011 | 17677 | 795.66  | -2.97654 | 4 K.SGTIFDNI( Splice@chr | 1.20E-10 | 0.002341 |
| 13July2011 | 12411 | 858.48  | 6.006088 | 3 _LETGIKPI( Splice@chr  | 6.98E-11 | 0.001221 |
| 13July2011 | 11987 | 685.88  | 4.188613 | 2 K.IVPGGGA chrX@1570    | 1.24E-14 | 0        |
| 13July2011 | 1878  | 400.72  | 7.024146 | 2 _SDAVPG( Splice@chr    | 8.08E-11 | 0.001462 |
| 13July2011 | 99    | 511.24  | 12.68013 | 3 R.GGDGGA chr3@2778     | 1.86E-11 | 2.94E-04 |
| 13July2011 | 5570  | 554.95  | 17.04197 | 3 R.M+15.99 chr3@1018    | 4.47E-11 | 0.001098 |
| 13July2011 | 12062 | 457.59  | 5.792762 | 3 K.IVPGGGA chrX@1570    | 6.20E-14 | 0        |
| 13July2011 | 17731 | 1074.07 | 18.6568  | 2 K.YFKINILEI chr2@1186  | 2.27E-11 | 2.94E-04 |
| 13July2011 | 11362 | 660.37  | -16.199  | 2 K.TK+14.01 chr1@1424   | 1.81E-10 | 0.003538 |
| 13July2011 | 472   | 452.23  | -1.48793 | 2 R.SGEPLSA( Splice@chr  | 3.60E-11 | 7.15E-04 |
| 13July2011 | 18656 | 1055.87 | -13.022  | 3 K.SGTIFDNI( Splice@chr | 5.28E-12 | 0        |
| 13July2011 | 13301 | 664.7   | 1.197202 | 3 _PTLNK+1. chr1@6526    | 6.38E-11 | 8.83E-04 |
| 13July2011 | 7753  | 639.65  | -12.525  | 3 R.NLMSQLI chr1@5405    | 3.16E-10 | 0.00496  |
| 13July2011 | 14336 | 763.48  | -1.96108 | 2 K.EKSLKIKIF chr1@3515  | 2.28E-10 | 0.003821 |
| 13July2011 | 6174  | 417.21  | -4.25277 | 2 K.WAKDGE chr5@1945     | 2.57E-11 | 5.37E-04 |
| 13July2011 | 1538  | 530.76  | -26.2682 | 2 L.RADHTHF chr3@8398    | 3.48E-10 | 0.005155 |
| 13July2011 | 8053  | 557.32  | -8.88674 | 2 R.LLIEYIGH chr1@3828   | 7.32E-11 | 8.83E-04 |
| 13July2011 | 8831  | 703.87  | 11.02855 | 2 Y.VVQVAID chr1@1045    | 2.66E-12 | 0        |
| 13July2011 | 3752  | 527.29  | 11.90088 | 2 K.KLDLNM( chr2@7182    | 2.19E-11 | 4.19E-04 |
| 13July2011 | 4106  | 728.71  | 2.602274 | 3 K.TPSEQQA chr1@1348    | 8.47E-13 | 0        |
| 13July2011 | 3177  | 439.23  | -12.3957 | 2 R.IDDKTSAI chr5@8738   | 1.17E-10 | 0.001576 |
| 13July2011 | 9898  | 550.82  | 20.90876 | 4 R.HSSGLKN chr5@1455    | 6.18E-11 | 8.83E-04 |
| 13July2011 | 2465  | 584.3   | -7.53396 | 2 R.FSLKNTEI chr4@2692   | 9.98E-11 | 0.001225 |
| 13July2011 | 1570  | 444.25  | -3.23598 | 2 R.AELSSRPI chr3@8104   | 1.92E-10 | 0.003269 |
| 13July2011 | 2511  | 735.33  | -27.5112 | 2 K.YGHANVI chr1@1065    | 3.58E-10 | 0.005484 |
| 13July2011 | 12681 | 1134.06 | -5.36126 | 2 _IPSAVGY( Splice@chr   | 1.13E-18 | 0        |
| 13July2011 | 1506  | 562.31  | -13.4391 | 2 R.FYLLLYLK Splice@chr  | 4.72E-11 | 7.73E-04 |
| 13July2011 | 9727  | 472.29  | -0.64754 | 2 _SPLFVPKI( chrX@4402   | 1.39E-10 | 0.00216  |
| 13July2011 | 6269  | 696.83  | -11.9803 | 2 R.TDRTESV chr1@1452    | 2.93E-10 | 0.004766 |
| 13July2011 | 294   | 511.24  | 12.68013 | 3 R.GGDGGA chr3@2778     | 5.57E-12 | 0        |
| 13July2011 | 11307 | 805.42  | -12.2158 | 2 R.QISTCKSS( Splice@chr | 8.83E-11 | 0.001225 |
| 13July2011 | 7480  | 717.42  | -20.7021 | 2 _KLDLTYEI( chrX@2081   | 4.16E-10 | 0.007409 |
| 13July2011 | 6232  | 417.21  | -4.25277 | 2 K.WAKDGE chr5@1945     | 3.08E-10 | 0.004862 |

|            |       |         |          |                         |          |          |
|------------|-------|---------|----------|-------------------------|----------|----------|
| 13July2011 | 2075  | 878.47  | 16.20745 | 1 R.SIAMFGP chr2@4157   | 5.52E-10 | 0.009961 |
| 13July2011 | 12282 | 660.37  | -16.199  | 2 K.TK+14.01 chr1@1424  | 1.71E-10 | 0.002958 |
| 13July2011 | 9944  | 673.32  | -23.1345 | 4 _QVREMH Splice@chr    | 7.96E-11 | 0.001001 |
| 13July2011 | 12745 | 1134.06 | -5.36126 | 2 _IPSAVGY( Splice@chr  | 2.89E-16 | 0        |
| 13July2011 | 728   | 531.27  | -10.5398 | 2 L.RADHTHF chr3@8398   | 2.13E-10 | 0.003601 |
| 13July2011 | 12573 | 484.28  | 10.44055 | 3 K.ISSAIAMf chr4@7544  | 2.67E-10 | 0.004447 |
| 13July2011 | 17313 | 1082.07 | 20.89009 | 2 K.YFKINILEI chr2@1186 | 5.01E-11 | 7.73E-04 |
| 13July2011 | 2374  | 412.23  | 25.3069  | 2 R.IASYQGG chrX@1679   | 1.55E-10 | 0.002729 |
| 13July2011 | 14751 | 804.91  | 25.79416 | 2 _LTMTWN chr1@4515     | 4.03E-11 | 6.61E-04 |
| 13July2011 | 14529 | 934.16  | 0.08721  | 3 K.LNILLDAF chr1@2327  | 4.60E-10 | 0.008115 |
| 13July2011 | 17302 | 1007.86 | 15.19559 | 3 R.CWNRRA Splice@chr   | 7.68E-11 | 0.001001 |
| 13July2011 | 1797  | 530.77  | -7.37354 | 2 L.RADHTHF chr3@8398   | 2.31E-10 | 0.003931 |
| 13July2011 | 18820 | 1103.59 | -25.2248 | 2 R.LFK+14.0 chr2@4315  | 1.03E-10 | 0.001225 |
| 13July2011 | 12338 | 660.37  | -16.199  | 2 K.TK+14.01 chr1@1424  | 4.97E-10 | 0.008844 |
| 13July2011 | 13174 | 858.48  | 6.006088 | 3 _LETGIKPI Splice@chr  | 5.84E-12 | 0        |
| 13July2011 | 12230 | 660.37  | -16.199  | 2 K.TK+14.01 chr1@1424  | 3.16E-10 | 0.00496  |
| 13July2011 | 12313 | 573.83  | 11.89294 | 2 E.SPTIMTTI chrX@1024  | 4.51E-10 | 0.008115 |
| 13July2011 | 4591  | 475.76  | -24.1924 | 2 K.ISSVLSSTi chr5@1092 | 4.07E-10 | 0.007209 |
| 13July2011 | 12929 | 685.88  | 4.188613 | 2 K.IVPGGGA chrX@1570   | 4.53E-19 | 0        |
| 13July2011 | 13067 | 664.7   | 1.197202 | 3 _PTLNK+1. chr1@6526   | 2.84E-10 | 0.004556 |
| 13July2011 | 13129 | 555.97  | 19.65028 | 3 K.M+15.99 chr5@1600   | 3.77E-10 | 0.006246 |
| 13July2011 | 10970 | 671.37  | -24.0361 | 2 T.FNIVHTQ Splice@chr  | 2.13E-10 | 0.003601 |
| 13July2011 | 5949  | 862.5   | 0.212545 | 1 _KSNSLVSI chr3@7289   | 5.26E-10 | 0.009357 |
| 13July2011 | 8885  | 703.87  | 11.02855 | 2 Y.VVQVAID chr1@1045   | 1.02E-12 | 0        |
| 13July2011 | 13666 | 693.43  | 22.25478 | 3 R.GFTPM+ chr4@7821    | 1.76E-11 | 2.84E-04 |
| 13July2011 | 16088 | 795.66  | -2.97654 | 4 K.SGTIFDNI Splice@chr | 1.45E-11 | 3.58E-04 |
| 13July2011 | 11281 | 685.88  | 4.188613 | 2 K.IVPGGGA chrX@1570   | 1.00E-18 | 0        |
| 13July2011 | 11054 | 756.37  | -13.3372 | 3 _IPSAVGY( Splice@chr  | 2.78E-11 | 6.91E-04 |
| 13July2011 | 11920 | 585.32  | 21.59109 | 2 R.IM+15.95 chr4@4488  | 2.58E-10 | 0.005687 |
| 13July2011 | 5075  | 696.83  | -11.9803 | 2 R.TDRTEVS chr1@1452   | 3.73E-10 | 0.008085 |
| 13July2011 | 12033 | 754.94  | 28.09244 | 2 K.RRKINSSI chr5@8964  | 1.15E-10 | 0.002466 |
| 13July2011 | 11967 | 585.32  | 21.59109 | 2 R.IM+15.95 chr4@4488  | 5.39E-11 | 9.86E-04 |
| 13July2011 | 4594  | 463.74  | -28.7537 | 2 _FLVFESGI chr5@1959   | 3.58E-10 | 0.007711 |
| 13July2011 | 7348  | 703.87  | 11.02855 | 2 Y.VVQVAID chr1@1045   | 2.80E-15 | 0        |
| 13July2011 | 8903  | 837.9   | 11.71382 | 2 V.ISTMTND chr2@4708   | 3.91E-10 | 0.008351 |
| 13July2011 | 648   | 466.77  | 16.90491 | 2 K.TADKTQI Splice@chr  | 1.75E-10 | 0.003606 |
| 13July2011 | 6775  | 509.8   | -23.773  | 2 R.SSVIMLIV chr2@5767  | 1.07E-10 | 0.002186 |
| 13July2011 | 6639  | 651.38  | 9.534514 | 2 K.KEAVILEL chrX@1506  | 2.14E-10 | 0.005027 |
| 13July2011 | 1002  | 562.31  | -13.4391 | 2 R.FYLLYLYK Splice@chr | 6.19E-11 | 9.86E-04 |
| 13July2011 | 11177 | 664.37  | 7.851479 | 3 _PTLNK+1. chr1@6526   | 4.03E-11 | 8.43E-04 |
| 13July2011 | 11542 | 858.48  | 6.006088 | 3 _LETGIKPI Splice@chr  | 1.14E-10 | 0.002466 |
| 13July2011 | 14363 | 849.42  | 8.560987 | 2 Q.DSSYFVE Splice@chr  | 2.68E-11 | 6.91E-04 |
| 13July2011 | 11229 | 685.88  | 4.188613 | 2 K.IVPGGGA chrX@1570   | 2.58E-14 | 0        |
| 13July2011 | 11066 | 1133.56 | -3.88019 | 2 _IPSAVGY( Splice@chr  | 4.80E-17 | 0        |
| 13July2011 | 7401  | 703.87  | 11.02855 | 2 Y.VVQVAID chr1@1045   | 1.76E-15 | 0        |
| 13July2011 | 6214  | 724.35  | 19.12636 | 3 V.CLTEEGK Splice@chr  | 7.54E-12 | 3.58E-04 |
| 13July2011 | 6212  | 520.78  | -0.87948 | 2 K.IALAYEM chr2@6701   | 5.26E-13 | 2.21E-04 |

|            |       |         |          |                         |          |          |
|------------|-------|---------|----------|-------------------------|----------|----------|
| 13July2011 | 942   | 562.31  | -13.4391 | 2 R.FYLLYLYK Splice@chr | 5.56E-11 | 9.86E-04 |
| 13July2011 | 4319  | 574.81  | -4.78661 | 2 K.NGPNNQ chrX@1711    | 1.56E-10 | 0.003323 |
| 13July2011 | 11125 | 1133.56 | -3.88019 | 2 _IPSAVGY( Splice@chr  | 4.05E-17 | 0        |
| 13July2011 | 6842  | 593.84  | -9.57474 | 2 R.NEIVFQV chrX@1474   | 1.46E-10 | 0.003048 |
| 13July2011 | 2729  | 526.79  | 15.09121 | 2 K.KLDLNM\ chr2@7182   | 4.38E-11 | 8.43E-04 |
| 13July2011 | 11108 | 756.37  | -13.3372 | 3 _IPSAVGY( Splice@chr  | 2.53E-10 | 0.005687 |
| 13July2011 | 11552 | 664.7   | 1.197202 | 3 _PTLNK+1. chr1@6526   | 3.83E-10 | 0.008085 |
| 13July2011 | 1551  | 530.77  | -7.37354 | 2 L.RADHTHF chr3@8398   | 3.10E-10 | 0.006108 |
| 13July2011 | 10227 | 605.87  | -19.9793 | 2 V.PSILLYLLI chrX@1323 | 1.48E-10 | 0.002093 |
| 13July2011 | 14020 | 849.42  | 8.560987 | 2 Q.DSSYFVE Splice@chr  | 1.31E-12 | 0        |
| 13July2011 | 7005  | 651.38  | 9.534514 | 2 K.KEAVILEL chrX@1506  | 3.84E-10 | 0.007676 |
| 13July2011 | 8422  | 897.43  | -16.505  | 3 _QVREMH Splice@chr    | 1.21E-10 | 0.001317 |
| 13July2011 | 4747  | 574.81  | -4.78661 | 2 K.NGPNNQ chrX@1711    | 1.70E-10 | 0.002408 |
| 13July2011 | 2760  | 400.73  | 8.70363  | 2 K.LCVPGVR chr2@7704   | 4.19E-10 | 0.008188 |
| 13July2011 | 704   | 495.26  | -0.67919 | 2 _RDEAQS( Splice@chr   | 9.09E-11 | 0.00116  |
| 13July2011 | 11092 | 685.88  | 4.188613 | 2 K.IVPGGGA chrX@1570   | 5.01E-19 | 0        |
| 13July2011 | 9713  | 664.32  | -27.1439 | 2 L.CGSGLYSI chr2@8242  | 1.99E-10 | 0.003324 |
| 13July2011 | 11305 | 664.7   | 1.197202 | 3 _PTLNK+1. chr1@6526   | 2.95E-10 | 0.005821 |
| 13July2011 | 15457 | 795.66  | -2.97654 | 4 K.SGTIFDNI Splice@chr | 9.61E-11 | 0.00116  |
| 13July2011 | 6618  | 520.28  | 2.350802 | 2 K.IALAYEM chr2@6701   | 3.09E-11 | 3.68E-04 |
| 13July2011 | 2163  | 412.23  | 25.3069  | 2 R.IASYQGG chrX@1679   | 4.67E-11 | 5.19E-04 |
| 13July2011 | 13272 | 849.42  | 8.560987 | 2 Q.DSSYFVE Splice@chr  | 2.74E-10 | 0.005393 |
| 13July2011 | 14402 | 792.16  | -5.99938 | 4 K.SGTIFDNI Splice@chr | 1.31E-10 | 0.001788 |
| 13July2011 | 4484  | 693.87  | -6.6949  | 2 V.ICVAVGD chr5@1063   | 3.46E-10 | 0.007122 |
| 13July2011 | 7679  | 703.87  | 11.02855 | 2 Y.VVQVAID chr1@1043   | 6.28E-13 | 0        |
| 13July2011 | 9327  | 851.49  | -3.4814  | 2 K.RGVRLSH chr2@2785   | 4.60E-10 | 0.009481 |
| 13July2011 | 11203 | 664.7   | 1.197202 | 3 _PTLNK+1. chr1@6526   | 2.93E-10 | 0.005821 |
| 13July2011 | 10882 | 1134.06 | -5.36126 | 2 _IPSAVGY( Splice@chr  | 1.18E-16 | 0        |
| 13July2011 | 10873 | 756.37  | -13.3372 | 3 _IPSAVGY( Splice@chr  | 1.56E-10 | 0.002093 |
| 13July2011 | 11255 | 664.7   | 1.197202 | 3 _PTLNK+1. chr1@6526   | 1.40E-10 | 0.001788 |
| 13July2011 | 919   | 466.77  | 16.90491 | 2 K.TADKTQI Splice@chr  | 4.35E-10 | 0.008333 |
| 13July2011 | 900   | 470.26  | -4.48736 | 2 _VVATAH\ chr5@6169    | 3.14E-10 | 0.006555 |
| 13July2011 | 703   | 531.28  | 8.35486  | 2 L.RADHTHF chr3@8398   | 2.28E-10 | 0.004212 |
| 13July2011 | 4042  | 780.41  | 20.17965 | 2 R.EM+15.9 chrX@1668   | 1.33E-10 | 0.001788 |
| 13July2011 | 6777  | 639.65  | -12.525  | 3 R.NLM+15. chr1@5403   | 1.18E-10 | 0.001317 |
| 13July2011 | 3154  | 501.27  | -9.82141 | 2 K.EIFHSAA\ Splice@chr | 2.38E-10 | 0.004358 |
| 13July2011 | 10926 | 756.37  | -13.3372 | 3 _IPSAVGY( Splice@chr  | 6.41E-11 | 5.19E-04 |
| 13July2011 | 12938 | 991.04  | -8.04821 | 2 S.K+14.016 chr5@5228  | 1.23E-10 | 0.001477 |
| 13July2011 | 11333 | 858.48  | 6.006088 | 3 _LETGIKPI Splice@chr  | 5.56E-12 | 0        |
| 13July2011 | 8094  | 931.78  | -28.5023 | 3 _VFGGK+1 chr5@3050    | 3.64E-10 | 0.007246 |
| 13July2011 | 10939 | 1134.06 | -5.36126 | 2 _IPSAVGY( Splice@chr  | 1.04E-15 | 0        |
| 13July2011 | 3417  | 527.29  | 11.90088 | 2 K.KLDLNM\ chr2@7182   | 2.19E-11 | 1.89E-04 |
| 13July2011 | 13982 | 849.42  | 8.560987 | 2 Q.DSSYFVE Splice@chr  | 1.88E-10 | 0.003176 |
| 13July2011 | 14362 | 792.15  | -18.5783 | 4 K.SGTIFDNI Splice@chr | 1.08E-10 | 0.00116  |
| 13July2011 | 1355  | 562.31  | -13.4391 | 2 R.FYLLYLYK Splice@chr | 4.86E-11 | 5.19E-04 |
| 13July2011 | 11389 | 858.48  | 6.006088 | 3 _LETGIKPI Splice@chr  | 1.38E-10 | 0.001788 |
| 13July2011 | 8194  | 931.78  | -28.5023 | 3 _VFGGK+1 chr5@3050    | 6.32E-11 | 5.19E-04 |

|            |       |         |          |                         |          |          |
|------------|-------|---------|----------|-------------------------|----------|----------|
| 13July2011 | 4958  | 461.26  | -11.8687 | 2 _LVFCALAI chr4@1474   | 3.52E-10 | 0.006033 |
| 13July2011 | 9336  | 673.32  | -23.1345 | 4 _QVREMH Splice@chr    | 4.85E-10 | 0.008803 |
| 13July2011 | 12274 | 1134.06 | -5.36126 | 2 _IPSAVGY( Splice@chr  | 2.58E-17 | 0        |
| 13July2011 | 2820  | 501.27  | -9.82141 | 2 K.EIFHSAA\ Splice@chr | 1.56E-10 | 0.003003 |
| 13July2011 | 18325 | 792.15  | -18.5783 | 4 K.SGTIFDNI Splice@chr | 1.19E-11 | 2.70E-04 |
| 13July2011 | 2307  | 400.72  | 7.024146 | 2 _SDAVPG\ Splice@chr   | 3.74E-10 | 0.006326 |
| 13July2011 | 6844  | 724.35  | 19.12636 | 3 V.CLTEEGK Splice@chr  | 1.66E-11 | 2.70E-04 |
| 13July2011 | 16613 | 1003.2  | 27.12227 | 3 R.CWNRRA Splice@chr   | 2.14E-11 | 2.70E-04 |
| 13July2011 | 12764 | 858.48  | 6.006088 | 3 _LETGIKPI Splice@chr  | 5.44E-13 | 0        |
| 13July2011 | 10946 | 700.37  | 11.86921 | 2 N.EWK+14. chrX@4292   | 5.21E-10 | 0.00952  |
| 13July2011 | 942   | 562.31  | -13.4391 | 2 R.FYLLYLYK Splice@chr | 4.72E-11 | 8.91E-04 |
| 13July2011 | 18439 | 792.16  | -5.99938 | 4 K.SGTIFDNI Splice@chr | 4.67E-12 | 1.43E-04 |
| 13July2011 | 3924  | 793.42  | 19.33353 | 2 R.NEKYSTM Splice@chr  | 4.65E-10 | 0.008075 |
| 13July2011 | 12060 | 484.28  | 10.44055 | 3 K.ISSAIAMf chr4@7544  | 2.36E-10 | 0.003931 |
| 13July2011 | 12442 | 685.88  | 4.188613 | 2 K.IVPGGGA chrX@1570   | 4.53E-19 | 0        |
| 13July2011 | 12821 | 858.48  | 6.006088 | 3 _LETGIKPI Splice@chr  | 6.20E-12 | 1.43E-04 |
| 13July2011 | 12221 | 1134.06 | -5.36126 | 2 _IPSAVGY( Splice@chr  | 1.48E-16 | 0        |
| 13July2011 | 3071  | 527.29  | 11.90088 | 2 K.KLDLNM\ chr2@7182   | 4.38E-11 | 8.91E-04 |
| 13July2011 | 1221  | 530.77  | -7.37354 | 2 L.RADHTHF chr3@8398   | 4.78E-10 | 0.008697 |
| 13July2011 | 11794 | 660.37  | -16.199  | 2 K.TK+14.01 chr1@1424  | 5.01E-10 | 0.009112 |
| 13July2011 | 7465  | 593.84  | -9.57474 | 2 R.NEIVFQV chrX@1474   | 1.25E-10 | 0.002586 |
| 13July2011 | 18612 | 795.66  | -10.8901 | 4 K.SGTIFDNI Splice@chr | 9.09E-12 | 1.43E-04 |
| 13July2011 | 12709 | 858.48  | 6.006088 | 3 _LETGIKPI Splice@chr  | 5.44E-15 | 0        |
| 13July2011 | 12385 | 685.88  | 4.188613 | 2 K.IVPGGGA chrX@1570   | 2.24E-16 | 0        |
| 13July2011 | 18417 | 795.66  | -2.97654 | 4 K.SGTIFDNI Splice@chr | 1.11E-11 | 1.43E-04 |
| 13July2011 | 2765  | 501.27  | -9.82141 | 2 K.EIFHSAA\ Splice@chr | 4.67E-10 | 0.008286 |
| 13July2011 | 396   | 495.26  | -0.67919 | 2 _RDEAQSK Splice@chr   | 2.26E-10 | 0.00383  |
| 13July2011 | 8186  | 703.87  | 11.02855 | 2 Y.VVQVAID chr1@1043   | 3.75E-14 | 0        |
| 13July2011 | 2256  | 400.73  | 8.70363  | 2 K.LCVPGVR chr2@7704   | 2.45E-10 | 0.004031 |
| 13July2011 | 12116 | 484.28  | 10.44055 | 3 K.ISSAIAMf chr4@7544  | 3.86E-10 | 0.006412 |
| 13July2011 | 18581 | 795.66  | -2.97654 | 4 K.SGTIFDNI Splice@chr | 1.97E-10 | 0.00342  |
| 13July2011 | 4003  | 519.61  | -7.21837 | 3 K.IGSMDFL chr5@1654   | 3.82E-10 | 0.006412 |
| 13July2011 | 393   | 531.28  | 8.35486  | 2 L.RADHTHF chr3@8398   | 2.37E-10 | 0.003931 |
| 13July2011 | 6894  | 724.35  | 19.12636 | 3 V.CLTEEGK Splice@chr  | 6.11E-12 | 1.43E-04 |
| 13July2011 | 17702 | 787.89  | 24.95531 | 2 K.FWREIQM chrX@1650   | 1.13E-10 | 0.002258 |
| 13July2011 | 7345  | 626.68  | 23.52414 | 3 R.VVDALGI Splice@chr  | 2.20E-14 | 0        |
| 13July2011 | 18248 | 792.15  | -18.5783 | 4 K.SGTIFDNI Splice@chr | 1.15E-10 | 0.002258 |
| 13July2011 | 1777  | 412.23  | 25.3069  | 2 R.IASYQGG chrX@1679   | 4.12E-11 | 8.91E-04 |
| 13July2011 | 18500 | 795.66  | -2.97654 | 4 K.SGTIFDNI Splice@chr | 5.89E-12 | 1.43E-04 |
| 13July2011 | 4264  | 693.87  | -6.6949  | 2 V.ICVAVGD chr5@1063   | 2.77E-11 | 5.30E-04 |
| 13July2011 | 3019  | 527.29  | 11.90088 | 2 K.KLDLNM\ chr2@7182   | 2.26E-11 | 2.70E-04 |
| 13July2011 | 5096  | 463.74  | -28.7537 | 2 _FLVFESGI chr5@1959   | 3.90E-10 | 0.006412 |
| 13July2011 | 4319  | 693.87  | -6.6949  | 2 V.ICVAVGD chr5@1063   | 4.67E-11 | 8.91E-04 |
| 13July2011 | 17730 | 634.84  | 6.410455 | 2 R.VDIGDILF Splice@chr | 5.09E-12 | 1.43E-04 |
| 13July2011 | 6697  | 421.25  | 28.95162 | 3 _EIVGMPA chr5@4046    | 1.88E-10 | 0.0032   |
| 13July2011 | 10813 | 555.32  | -20.8823 | 2 _FVPGIPLF chr2@1311   | 3.28E-10 | 0.005818 |
| 13July2011 | 18545 | 795.66  | -2.97654 | 4 K.SGTIFDNI Splice@chr | 1.50E-11 | 2.70E-04 |

|            |       |         |          |                           |          |          |
|------------|-------|---------|----------|---------------------------|----------|----------|
| 13July2011 | 18485 | 792.16  | -5.99938 | 4 K.SGTIFDNI Splice@chr   | 6.95E-14 | 0        |
| 13July2011 | 8795  | 703.87  | 11.02855 | 2 Y.VVQVAID chr1@1045     | 6.69E-13 | 0        |
| 13July2011 | 3828  | 527.29  | 11.90088 | 2 K.KLDLNM\ chr2@7182     | 2.19E-11 | 8.58E-04 |
| 13July2011 | 7503  | 724.35  | 19.12636 | 3 V.CLTEEGK Splice@chr    | 1.15E-11 | 4.68E-04 |
| 13July2011 | 3050  | 400.73  | 8.70363  | 2 K.LCVPGVR chr2@7704     | 4.18E-10 | 0.009665 |
| 13July2011 | 12293 | 756.37  | -13.3372 | 3 _ .IPSAVGY( Splice@chr  | 1.56E-10 | 0.004499 |
| 13July2011 | 12363 | 1134.06 | -5.36126 | 2 _ .IPSAVGY( Splice@chr  | 7.47E-17 | 0        |
| 13July2011 | 3186  | 439.23  | -12.3957 | 2 R.IDDKTSAI chr5@8738    | 1.12E-10 | 0.003102 |
| 13July2011 | 840   | 531.28  | 8.35486  | 2 L.RADHTHF chr3@8398     | 2.42E-10 | 0.006183 |
| 13July2011 | 3881  | 527.29  | 11.90088 | 2 K.KLDLNM\ chr2@7182     | 2.19E-11 | 8.58E-04 |
| 13July2011 | 5013  | 693.87  | -6.6949  | 2 V.ICVAVGD chr5@1065     | 1.12E-10 | 0.003102 |
| 13July2011 | 16096 | 849.42  | 8.560987 | 2 Q.DSSYFVE Splice@chr    | 9.30E-11 | 0.002752 |
| 13July2011 | 1016  | 544.31  | -13.0314 | 2 K.KIDEIWRI chr5@1864    | 2.98E-10 | 0.007497 |
| 13July2011 | 8736  | 703.87  | 11.02855 | 2 Y.VVQVAID chr1@1045     | 3.67E-15 | 0        |
| 13July2011 | 12307 | 1134.06 | -5.36126 | 2 _ .IPSAVGY( Splice@chr  | 4.75E-18 | 0        |
| 13July2011 | 12760 | 858.48  | 6.006088 | 3 _ .LETGIIPK( Splice@chr | 1.83E-10 | 0.005317 |
| 13July2011 | 7443  | 724.35  | 19.12636 | 3 V.CLTEEGK Splice@chr    | 9.54E-11 | 0.002752 |
| 13July2011 | 7829  | 556.83  | 14.93446 | 2 K.VIVVYAA: chr3@8274    | 1.88E-11 | 8.58E-04 |
| 13July2011 | 9381  | 697.34  | -19.7214 | 2 K.MDSTLNI chrX@4525     | 5.06E-12 | 0        |
| 13July2011 | 12873 | 858.48  | 6.006088 | 3 _ .LETGIIPK( Splice@chr | 1.51E-11 | 7.57E-04 |
| 13July2011 | 12512 | 685.88  | 4.188613 | 2 K.IVPGGGA chrX@1570     | 7.86E-16 | 0        |
| 13July2011 | 1586  | 562.31  | -13.4391 | 2 R.FYLLYLYK Splice@chr   | 4.72E-11 | 9.73E-04 |
| 13July2011 | 10259 | 515.62  | -18.8182 | 3 K.ILKIK+14. chr2@1445   | 3.73E-10 | 0.009141 |
| 13July2011 | 2948  | 400.72  | -16.3384 | 2 K.LCVPGVR chr2@7704     | 2.09E-10 | 0.005517 |
| 13July2011 | 12348 | 756.37  | -13.3372 | 3 _ .IPSAVGY( Splice@chr  | 7.76E-11 | 0.002124 |
| 13July2011 | 2468  | 412.23  | 25.3069  | 2 R.IASYQGG chrX@1679     | 5.50E-11 | 0.001507 |
| 13July2011 | 6476  | 511.93  | -27.953  | 3 K.IGQELCS: chr5@1252    | 4.18E-10 | 0.009665 |
| 13July2011 | 12089 | 581.81  | 1.155966 | 2 K.SWVDSS( chr2@1165     | 3.17E-10 | 0.007936 |
| 13July2011 | 6257  | 417.21  | -4.25277 | 2 K.WAKDGE chr5@1945      | 7.38E-11 | 0.002124 |
| 13July2011 | 5689  | 461.26  | -11.8687 | 2 _ .LVFCALAI chr4@1474   | 1.23E-10 | 0.003201 |
| 13July2011 | 9550  | 472.29  | -0.64754 | 2 _ .SPLFVPKf chrX@4402   | 1.30E-10 | 0.003814 |
| 13July2011 | 12567 | 685.88  | 4.188613 | 2 K.IVPGGGA chrX@1570     | 4.53E-19 | 0        |
| 13July2011 | 9429  | 477.31  | 9.034217 | 2 R.LLLSSVPP chr5@1108    | 1.74E-10 | 0.005089 |
| 13July2011 | 5882  | 463.74  | -28.7537 | 2 _ .FLVFESGI chr5@1959   | 1.71E-10 | 0.004975 |
| 13July2011 | 3512  | 403.22  | -14.6688 | 3 R.FSAIRDVI chr1@2337    | 1.19E-10 | 0.003201 |
| 13July2011 | 14282 | 474.28  | -15.3895 | 3 _ .RCTIVLFL Splice@chr  | 1.69E-10 | 0.004858 |
| 13July2011 | 16145 | 849.42  | 8.560987 | 2 Q.DSSYFVE Splice@chr    | 2.78E-11 | 8.58E-04 |
| 13July2011 | 8375  | 724.35  | 19.12636 | 3 V.CLTEEGK Splice@chr    | 8.08E-13 | 0        |
| 13July2011 | 8355  | 421.25  | 28.95162 | 3 _ .EIVGMPA chr5@4046    | 5.13E-10 | 0.009975 |
| 13July2011 | 9027  | 626.68  | 23.52414 | 3 R.VVDALGI Splice@chr    | 5.55E-14 | 0        |
| 13July2011 | 7148  | 403.46  | -23.4306 | 4 R.K+14.016 Splice@chr   | 1.23E-10 | 0.003448 |
| 13July2011 | 19613 | 792.15  | -18.5783 | 4 K.SGTIFDNI Splice@chr   | 9.18E-13 | 0        |
| 13July2011 | 8487  | 724.35  | 19.12636 | 3 V.CLTEEGK Splice@chr    | 2.62E-10 | 0.005293 |
| 13July2011 | 15414 | 585.32  | 21.59109 | 2 R.IM+15.95 chr4@4488    | 3.16E-10 | 0.00583  |
| 13July2011 | 763   | 531.27  | -10.5398 | 2 L.RADHTHF chr3@8398     | 4.75E-10 | 0.009152 |
| 13July2011 | 5399  | 693.87  | -6.6949  | 2 V.ICVAVGD chr5@1065     | 4.54E-11 | 0.001135 |
| 13July2011 | 3964  | 526.78  | -3.83085 | 2 K.KLDLNM\ chr2@7182     | 2.19E-11 | 7.08E-04 |

|            |       |         |          |                         |          |          |
|------------|-------|---------|----------|-------------------------|----------|----------|
| 13July2011 | 5873  | 434.24  | 13.9946  | 3 _RSNDQTI chr5@6378    | 1.39E-10 | 0.003448 |
| 13July2011 | 21444 | 795.66  | -2.97654 | 4 K.SGTIFDNI Splice@chr | 1.62E-10 | 0.004034 |
| 13July2011 | 7091  | 403.46  | -23.4306 | 4 R.K+14.016 Splice@chr | 4.12E-10 | 0.007671 |
| 13July2011 | 2958  | 456.3   | 20.93878 | 2 R.RAAAPLR Splice@chr  | 2.56E-10 | 0.005293 |
| 13July2011 | 14820 | 664.7   | 1.197202 | 3 _PTLNK+1. chr1@6526   | 1.64E-10 | 0.004034 |
| 13July2011 | 1328  | 562.31  | -13.4391 | 2 R.FYLLYLYK Splice@chr | 4.72E-11 | 0.001359 |
| 13July2011 | 13723 | 660.37  | -16.199  | 2 K.TK+14.01 chr1@1424  | 3.44E-10 | 0.006488 |
| 13July2011 | 21419 | 1060.54 | -6.74128 | 3 K.SGTIFDNI Splice@chr | 1.34E-11 | 3.77E-04 |
| 13July2011 | 14342 | 1134.06 | -5.36126 | 2 _IPSAVGY( Splice@chr  | 2.90E-18 | 0        |
| 13July2011 | 20919 | 795.65  | -23.4135 | 4 K.SGTIFDNI Splice@chr | 1.21E-11 | 1.26E-04 |
| 13July2011 | 3074  | 400.72  | 7.024146 | 2 _SDAVPG\ Splice@chr   | 4.75E-10 | 0.009152 |
| 13July2011 | 21401 | 795.66  | -10.8901 | 4 K.SGTIFDNI Splice@chr | 5.11E-10 | 0.009789 |
| 13July2011 | 21402 | 1060.55 | 2.708983 | 3 K.SGTIFDNI Splice@chr | 2.28E-11 | 7.08E-04 |
| 13July2011 | 2470  | 412.23  | 25.3069  | 2 R.IASYQGG chrX@1679   | 4.55E-11 | 0.001135 |
| 13July2011 | 13774 | 660.37  | -16.199  | 2 K.TK+14.01 chr1@1424  | 1.74E-10 | 0.004121 |
| 13July2011 | 9166  | 593.84  | -9.57474 | 2 R.NEIVFQV chrX@1474   | 2.20E-10 | 0.004766 |
| 13July2011 | 8429  | 724.35  | 19.12636 | 3 V.CLTEEGK Splice@chr  | 8.74E-13 | 0        |
| 13July2011 | 15103 | 664.7   | 1.197202 | 3 _PTLNK+1. chr1@6526   | 4.79E-11 | 0.001467 |
| 13July2011 | 15413 | 759.4   | -15.0495 | 2 K.FIDANLQ chr4@8206   | 1.33E-10 | 0.003448 |
| 13July2011 | 20987 | 795.66  | -2.97654 | 4 K.SGTIFDNI Splice@chr | 6.04E-12 | 1.26E-04 |
| 13July2011 | 644   | 531.27  | -10.5398 | 2 L.RADHTHF chr3@8398   | 3.14E-10 | 0.00583  |
| 13July2011 | 1410  | 530.76  | -26.2682 | 2 L.RADHTHF chr3@8398   | 4.22E-10 | 0.007856 |
| 13July2011 | 19137 | 792.15  | -18.5783 | 4 K.SGTIFDNI Splice@chr | 1.79E-10 | 0.004192 |
| 13July2011 | 5451  | 693.87  | -6.6949  | 2 V.ICVAVGD chr5@1063   | 7.77E-11 | 0.002063 |
| 13July2011 | 6501  | 463.74  | -28.7537 | 2 _FLVFESG( chr5@1959   | 4.67E-10 | 0.00878  |
| 13July2011 | 14292 | 1134.06 | -5.36126 | 2 _IPSAVGY( Splice@chr  | 5.25E-19 | 0        |
| 13July2011 | 20845 | 795.66  | -10.8901 | 4 K.SGTIFDNI Splice@chr | 7.04E-12 | 1.26E-04 |
| 13July2011 | 9938  | 953.49  | 18.26316 | 1 K.MTTSSLT chrX@7280   | 3.90E-10 | 0.007492 |
| 13July2011 | 14277 | 756.37  | -13.3372 | 3 _IPSAVGY( Splice@chr  | 2.05E-10 | 0.004471 |
| 13July2011 | 18578 | 849.92  | 6.583873 | 2 Q.DSSYFVE Splice@chr  | 2.37E-10 | 0.005049 |
| 13July2011 | 20880 | 795.66  | -10.8901 | 4 K.SGTIFDNI Splice@chr | 3.91E-12 | 1.26E-04 |
| 13July2011 | 11144 | 897.43  | -16.505  | 3 _QVREMH Splice@chr    | 1.21E-10 | 0.00338  |
| 13July2011 | 1384  | 562.31  | -13.4391 | 2 R.FYLLYLYK Splice@chr | 4.86E-11 | 0.001467 |
| 13July2011 | 15292 | 693.43  | 22.25478 | 3 R.GFTPM+ chr4@7821    | 1.38E-10 | 0.003448 |
| 13July2011 | 14212 | 484.28  | 10.44055 | 3 K.ISSAIAMF Splice@chr | 3.00E-10 | 0.005554 |
| 13July2011 | 6980  | 696.83  | -11.9803 | 2 R.TDRTESV chr1@1452   | 3.37E-10 | 0.006488 |
| 13July2011 | 14821 | 858.48  | 6.006088 | 3 _LETGIIP( Splice@chr  | 1.63E-12 | 0        |
| 13July2011 | 219   | 611.28  | -1.00013 | 2 R.ENGNVS( Splice@chr  | 1.21E-11 | 1.26E-04 |
| 13July2011 | 20643 | 792.15  | -18.5783 | 4 K.SGTIFDNI Splice@chr | 4.77E-10 | 0.009152 |
| 13July2011 | 20794 | 1074.07 | 18.6568  | 2 K.YFKINILEI chr2@1186 | 5.93E-11 | 0.001767 |
| 13July2011 | 20797 | 792.16  | -5.99938 | 4 K.SGTIFDNI Splice@chr | 6.43E-12 | 1.26E-04 |
| 13July2011 | 3580  | 501.27  | -9.82141 | 2 K.EIFHSAA( Splice@chr | 6.95E-11 | 0.001869 |
| 13July2011 | 21063 | 760.4   | -4.0463  | 3 _TQTNTKI( chrX@7978   | 3.42E-10 | 0.006488 |
| 13July2011 | 21453 | 795.66  | -10.8901 | 4 K.SGTIFDNI Splice@chr | 1.24E-11 | 1.26E-04 |
| 13July2011 | 21432 | 795.66  | -2.97654 | 4 K.SGTIFDNI Splice@chr | 2.25E-12 | 0        |
| 13July2011 | 21433 | 1060.55 | 2.708983 | 3 K.SGTIFDNI Splice@chr | 2.50E-11 | 7.08E-04 |
| 13July2011 | 20930 | 1060.54 | -6.74128 | 3 K.SGTIFDNI Splice@chr | 2.39E-12 | 0        |

|            |       |         |          |                          |          |          |
|------------|-------|---------|----------|--------------------------|----------|----------|
| 13July2011 | 17804 | 759.39  | -7.28686 | 2 K.LSNFREIS chr4@9735   | 3.52E-10 | 0.006671 |
| 13July2011 | 21377 | 795.66  | -2.97654 | 4 K.SGTIFDNI Splice@chr  | 2.70E-11 | 7.08E-04 |
| 13July2011 | 21418 | 795.66  | -10.8901 | 4 K.SGTIFDNI Splice@chr  | 3.90E-12 | 1.26E-04 |
| 13July2011 | 14877 | 858.48  | 6.006088 | 3 _.LETGIIKP\ Splice@chr | 1.30E-11 | 1.26E-04 |
| 13July2011 | 14501 | 685.88  | 4.188613 | 2 K.IVPGGGA chrX@1570    | 1.77E-15 | 0        |
| 13July2011 | 21378 | 1060.54 | -6.74128 | 3 K.SGTIFDNI Splice@chr  | 7.12E-12 | 1.26E-04 |
| 13July2011 | 5755  | 693.87  | -6.6949  | 2 V.ICVAVGD chr5@1065    | 1.52E-10 | 0.003941 |
| 13July2011 | 7206  | 403.46  | -23.4306 | 4 R.K+14.016 Splice@chr  | 3.26E-10 | 0.006014 |
| 13July2011 | 20832 | 792.16  | -5.99938 | 4 K.SGTIFDNI Splice@chr  | 3.11E-12 | 0        |
| 13July2011 | 20115 | 634.84  | 6.410455 | 2 R.VDIGDILF Splice@chr  | 9.37E-13 | 0        |
| 13July2011 | 8151  | 724.35  | 19.12636 | 3 V.CLTEEGK Splice@chr   | 8.51E-11 | 0.002277 |
| 13July2011 | 14559 | 685.88  | 4.188613 | 2 K.IVPGGGA chrX@1570    | 9.99E-14 | 0        |
| 13July2011 | 3244  | 400.72  | 7.024146 | 2 _SDAVPG\ Splice@chr    | 4.48E-10 | 0.008407 |
| 13July2011 | 5806  | 696.84  | 2.415461 | 2 R.TDRTESV chr1@1452    | 4.74E-10 | 0.008151 |
| 13July2011 | 15479 | 665.37  | -26.6417 | 2 Q.INNK+14 Splice@chr   | 3.54E-10 | 0.006057 |
| 13July2011 | 10176 | 671.37  | -24.0361 | 2 T.FNIVHTQ Splice@chr   | 1.57E-10 | 0.002324 |
| 13July2011 | 6957  | 724.35  | 19.12636 | 3 V.CLTEEGK Splice@chr   | 1.14E-10 | 0.001846 |
| 13July2011 | 8884  | 574.81  | 19.18282 | 4 K.TK+14.01 chr5@4987   | 4.23E-10 | 0.00683  |
| 13July2011 | 8743  | 931.78  | -28.5023 | 3 _VFGGK+1 chr5@3050     | 5.65E-10 | 0.008788 |
| 13July2011 | 3154  | 501.77  | -13.1744 | 2 K.EIFHSAA\ Splice@chr  | 1.83E-10 | 0.002927 |
| 13July2011 | 1347  | 562.31  | -13.4391 | 2 R.FYLLLYLK Splice@chr  | 5.58E-11 | 5.59E-04 |
| 13July2011 | 7011  | 520.79  | 18.27955 | 2 K.IALAYEM chr2@6701    | 4.39E-10 | 0.007043 |
| 13July2011 | 6901  | 724.35  | 19.12636 | 3 V.CLTEEGK Splice@chr   | 1.79E-12 | 0        |
| 13July2011 | 11726 | 1134.06 | -5.36126 | 2 _IPSAVGY\ Splice@chr   | 3.48E-18 | 0        |
| 13July2011 | 11752 | 833.94  | 2.824179 | 2 _IIEPYVAV Splice@chr   | 4.54E-10 | 0.007624 |
| 13July2011 | 6687  | 724.35  | 19.12636 | 3 V.CLTEEGK Splice@chr   | 7.27E-11 | 9.55E-04 |
| 13July2011 | 11776 | 1134.06 | -5.36126 | 2 _IPSAVGY\ Splice@chr   | 1.85E-18 | 0        |
| 13July2011 | 5004  | 580.27  | 26.13171 | 2 K.YEYSEQN chr2@9837    | 3.92E-11 | 2.87E-04 |
| 13July2011 | 3206  | 501.27  | -9.82141 | 2 K.EIFHSAA\ Splice@chr  | 1.63E-10 | 0.00244  |
| 13July2011 | 12320 | 858.48  | 6.006088 | 3 _LETGIIKP\ Splice@chr  | 2.33E-12 | 0        |
| 13July2011 | 12173 | 592.36  | -24.6673 | 2 K.LIKISTNA chr5@1997   | 6.26E-11 | 6.91E-04 |
| 13July2011 | 12659 | 616.36  | 26.76395 | 3 K.LQIFETPF chr1@1059   | 5.65E-11 | 5.59E-04 |
| 13July2011 | 13438 | 763.48  | -1.96108 | 2 K.EKSLKIKIF chr1@3515  | 5.46E-10 | 0.008697 |
| 13July2011 | 3450  | 527.29  | 11.90088 | 2 K.KLDLNM\ chr2@7182    | 2.26E-11 | 1.50E-04 |
| 13July2011 | 16326 | 1007.86 | 15.19559 | 3 R.CWNRRA Splice@chr    | 4.41E-10 | 0.007043 |
| 13July2011 | 14169 | 991.05  | 2.067379 | 2 S.K+14.016 chr5@5228   | 3.15E-10 | 0.005255 |
| 13July2011 | 13382 | 763.48  | -1.96108 | 2 K.EKSLKIKIF chr1@3515  | 5.78E-10 | 0.009007 |
| 13July2011 | 11953 | 685.88  | 4.188613 | 2 K.IVPGGGA chrX@1570    | 6.59E-13 | 0        |
| 13July2011 | 5481  | 463.74  | -28.7537 | 2 _FLVFESGI chr5@1959    | 4.78E-10 | 0.008151 |
| 13July2011 | 17644 | 1074.07 | 18.6568  | 2 K.YFKINILEI chr2@1186  | 2.13E-11 | 1.50E-04 |
| 13July2011 | 8874  | 697.34  | -19.7214 | 2 K.MDSTLNI chrX@4525    | 3.02E-11 | 2.87E-04 |
| 13July2011 | 7546  | 593.84  | -9.57474 | 2 R.NEIVFQV chrX@1474    | 1.30E-10 | 0.002074 |
| 13July2011 | 15599 | 849.42  | 8.560987 | 2 Q.DSSYFVE Splice@chr   | 8.08E-13 | 0        |
| 13July2011 | 8931  | 697.34  | -19.7214 | 2 K.MDSTLNI chrX@4525    | 1.54E-11 | 0        |
| 13July2011 | 9656  | 837.9   | 11.71382 | 2 V.ISTMTNC chr2@4708    | 2.42E-10 | 0.004001 |
| 13July2011 | 16559 | 792.16  | -5.99938 | 4 K.SGTIFDNI Splice@chr  | 8.30E-12 | 0        |
| 13July2011 | 12271 | 858.48  | 6.006088 | 3 _LETGIIKP\ Splice@chr  | 1.05E-12 | 0        |

|            |       |         |          |                          |          |          |
|------------|-------|---------|----------|--------------------------|----------|----------|
| 13July2011 | 2531  | 456.3   | 20.93878 | 2 R.RAAAPLR Splice@chr   | 1.54E-10 | 0.002324 |
| 13July2011 | 17919 | 795.66  | -10.8901 | 4 K.SGTIFDNI Splice@chr  | 1.24E-11 | 0        |
| 13July2011 | 18249 | 795.66  | -2.97654 | 4 K.SGTIFDNI Splice@chr  | 6.65E-12 | 0        |
| 13July2011 | 5504  | 585.83  | -9.70588 | 2 A.WVPARE chr2@1467     | 2.42E-10 | 0.004001 |
| 13July2011 | 16985 | 634.84  | 6.410455 | 2 R.VDIGDILF Splice@chr  | 1.80E-12 | 0        |
| 13July2011 | 18271 | 795.66  | -2.97654 | 4 K.SGTIFDNI Splice@chr  | 5.68E-11 | 5.59E-04 |
| 13July2011 | 4993  | 574.81  | -4.78661 | 2 K.NGPNNQ chrX@1712     | 1.81E-10 | 0.002927 |
| 13July2011 | 3506  | 527.29  | 11.90088 | 2 K.KLDLNM\ chr2@7182    | 2.26E-11 | 1.50E-04 |
| 13July2011 | 16072 | 792.15  | -18.5783 | 4 K.SGTIFDNI Splice@chr  | 3.61E-10 | 0.006287 |
| 13July2011 | 17959 | 795.66  | -2.97654 | 4 K.SGTIFDNI Splice@chr  | 1.15E-11 | 0        |
| 13July2011 | 7189  | 639.65  | -12.525  | 3 R.NLM+15. chr1@5403    | 1.75E-10 | 0.002691 |
| 13July2011 | 10994 | 605.87  | -19.9793 | 2 V.PSILLYLLI chrX@1323  | 1.54E-10 | 0.002324 |
| 13July2011 | 11681 | 484.28  | 10.44055 | 3 K.ISSAIAMf chr4@7544   | 3.80E-10 | 0.006382 |
| 13July2011 | 12455 | 833.43  | -7.18554 | 2 _..IIEPYVAV Splice@chr | 2.37E-10 | 0.003878 |
| 13July2011 | 1292  | 562.31  | -13.4391 | 2 R.FYLLYLYK Splice@chr  | 5.67E-11 | 5.59E-04 |
| 13July2011 | 4616  | 693.87  | -6.6949  | 2 V.ICVAVGD chr5@1063    | 2.01E-10 | 0.003161 |
| 13July2011 | 18287 | 795.66  | -10.8901 | 4 K.SGTIFDNI Splice@chr  | 2.02E-10 | 0.003161 |
| 13July2011 | 694   | 495.26  | -0.67919 | 2 _..RDEAQSk Splice@chr  | 4.92E-10 | 0.008151 |
| 13July2011 | 8821  | 697.34  | -19.7214 | 2 K.MDSTLNI chrX@4525    | 4.78E-11 | 4.23E-04 |
| 13July2011 | 10113 | 671.37  | -24.0361 | 2 T.FNIVHTQ Splice@chr   | 4.95E-10 | 0.008151 |
| 13July2011 | 17704 | 1055.87 | -13.022  | 3 K.SGTIFDNI Splice@chr  | 3.92E-14 | 0        |
| 13July2011 | 11826 | 756.37  | -13.3372 | 3 _..IPSAVGY( Splice@chr | 4.08E-11 | 2.87E-04 |
| 13July2011 | 5656  | 417.21  | -4.25277 | 2 K.WAKDGE chr5@1945     | 2.55E-11 | 0.001393 |
| 13July2011 | 17962 | 792.15  | -18.5783 | 4 K.SGTIFDNI Splice@chr  | 3.45E-12 | 1.88E-04 |
| 13July2011 | 12076 | 685.88  | 4.188613 | 2 K.IVPGGGA chrX@1570    | 1.00E-18 | 0        |
| 13July2011 | 5714  | 417.21  | -4.25277 | 2 K.WAKDGE chr5@1945     | 6.06E-11 | 0.002591 |
| 13July2011 | 17904 | 1060.54 | -6.74128 | 3 K.SGTIFDNI Splice@chr  | 2.38E-10 | 0.005832 |
| 13July2011 | 585   | 531.28  | 8.35486  | 2 L.RADHTHF chr3@8398    | 1.38E-10 | 0.004835 |
| 13July2011 | 11884 | 1134.05 | -14.1995 | 2 _..IPSAVGY( Splice@chr | 4.57E-17 | 0        |
| 13July2011 | 12276 | 664.7   | 1.197202 | 3 _..PTLNK+1. chr1@6526  | 4.08E-10 | 0.008966 |
| 13July2011 | 17919 | 792.16  | -5.99938 | 4 K.SGTIFDNI Splice@chr  | 1.20E-12 | 0        |
| 13July2011 | 17926 | 1060.55 | 2.708983 | 3 K.SGTIFDNI Splice@chr  | 4.10E-10 | 0.008966 |
| 13July2011 | 15781 | 643.37  | -18.6229 | 2 R.FSISLLFF/ chr2@1492  | 9.19E-11 | 0.003639 |
| 13July2011 | 1207  | 530.76  | -26.2682 | 2 L.RADHTHF chr3@8398    | 1.74E-10 | 0.005012 |
| 13July2011 | 2095  | 412.23  | 25.3069  | 2 R.IASYQGG chrX@1679    | 3.03E-11 | 0.001538 |
| 13July2011 | 4861  | 442.26  | -15.8607 | 3 R.ILSVPRLF Splice@chr  | 1.79E-10 | 0.005012 |
| 13July2011 | 15569 | 849.42  | 8.560987 | 2 Q.DSSYFVE Splice@chr   | 3.16E-10 | 0.006992 |
| 13July2011 | 12298 | 858.48  | 6.006088 | 3 _..LETGIKPI Splice@chr | 1.52E-13 | 0        |
| 13July2011 | 6917  | 724.35  | 19.12636 | 3 V.CLTEEGK Splice@chr   | 9.25E-11 | 0.003639 |
| 13July2011 | 3185  | 501.27  | -9.82141 | 2 K.EIFHSAA\ Splice@chr  | 3.56E-10 | 0.007804 |
| 13July2011 | 17897 | 792.16  | -5.99938 | 4 K.SGTIFDNI Splice@chr  | 1.67E-12 | 0        |
| 13July2011 | 11826 | 1134.06 | -5.36126 | 2 _..IPSAVGY( Splice@chr | 1.91E-18 | 0        |
| 13July2011 | 17875 | 792.15  | -18.5783 | 4 K.SGTIFDNI Splice@chr  | 1.61E-11 | 0.001126 |
| 13July2011 | 3413  | 527.29  | 11.90088 | 2 K.KLDLNM\ chr2@7182    | 2.26E-11 | 0.001262 |
| 13July2011 | 17856 | 792.15  | -18.5783 | 4 K.SGTIFDNI Splice@chr  | 1.33E-11 | 9.99E-04 |
| 13July2011 | 9223  | 897.42  | -27.6753 | 3 _..QVREMH Splice@chr   | 1.48E-10 | 0.004835 |
| 13July2011 | 10294 | 851.49  | -3.4814  | 2 K.RGVRLSH chr2@2785    | 9.85E-11 | 0.003881 |

|            |       |         |          |                         |          |          |
|------------|-------|---------|----------|-------------------------|----------|----------|
| 13July2011 | 17937 | 792.15  | -18.5783 | 4 K.SGTIFDNI Splice@chr | 9.64E-11 | 0.003881 |
| 13July2011 | 10456 | 805.92  | -14.301  | 2 R.QISTCKSS Splice@chr | 2.49E-10 | 0.005936 |
| 13July2011 | 12353 | 858.48  | 6.006088 | 3 _LETGIKPI Splice@chr  | 3.82E-15 | 0        |
| 13July2011 | 6920  | 717.42  | -20.7021 | 2 _KLDLTYEI chrX@2081   | 1.52E-10 | 0.004921 |
| 13July2011 | 11712 | 484.28  | 10.44055 | 3 K.ISSAIAMf chr4@7544  | 2.49E-10 | 0.005936 |
| 13July2011 | 12025 | 686.38  | 1.739395 | 2 K.IVPGGGA chrX@1570   | 1.00E-18 | 0        |
| 13July2011 | 17726 | 792.15  | -18.5783 | 4 K.SGTIFDNI Splice@chr | 3.64E-10 | 0.008164 |
| 13July2011 | 17882 | 1060.55 | 2.708983 | 3 K.SGTIFDNI Splice@chr | 1.45E-11 | 0.001126 |
| 13July2011 | 11873 | 756.37  | -13.3372 | 3 _IPSAVGY( Splice@chr  | 3.17E-11 | 0.001538 |
| 13July2011 | 4337  | 793.42  | 19.33353 | 2 R.NEKYSTM Splice@chr  | 3.52E-10 | 0.007684 |
| 13July2011 | 3626  | 452.91  | -26.2915 | 3 K.INLNHSI chr1@1429   | 2.66E-10 | 0.006163 |
| 13July2011 | 1178  | 562.31  | -13.4391 | 2 R.FYLLLYLK Splice@chr | 8.30E-11 | 0.002827 |
| 13July2011 | 3466  | 527.29  | 11.90088 | 2 K.KLDLNM\ chr2@7182   | 2.26E-11 | 0.001262 |
| 13July2011 | 17744 | 792.15  | -18.5783 | 4 K.SGTIFDNI Splice@chr | 6.57E-11 | 0.002591 |
| 13July2011 | 2279  | 735.33  | -27.5112 | 2 K.YGHANVI chr1@1065   | 9.45E-11 | 0.003771 |
| 13July2011 | 11348 | 660.37  | -16.199  | 2 K.TK+14.01 chr1@1424  | 4.42E-10 | 0.009405 |
| 13July2011 | 9887  | 501.63  | -6.98995 | 3 K.ILHFKVLC chr5@1670  | 1.24E-10 | 0.0046   |
| 13July2011 | 11957 | 1134.06 | -5.36126 | 2 _IPSAVGY( Splice@chr  | 2.44E-14 | 0        |
| 13July2011 | 5400  | 463.74  | -28.7537 | 2 _FLVFESGI chr5@1959   | 3.08E-10 | 0.006868 |
| 13July2011 | 11933 | 756.37  | -13.3372 | 3 _IPSAVGY( Splice@chr  | 1.26E-11 | 9.99E-04 |
| 13July2011 | 11439 | 573.83  | 11.89294 | 2 E.SPTIMTTI chrX@1024  | 3.86E-10 | 0.008762 |
| 13July2011 | 9232  | 673.32  | -23.1345 | 4 _QVREMH Splice@chr    | 2.49E-10 | 0.005936 |
| 13July2011 | 11459 | 660.37  | -16.199  | 2 K.TK+14.01 chr1@1424  | 3.61E-10 | 0.00805  |
| 13July2011 | 8212  | 703.87  | 11.02855 | 2 Y.VVQVAID chr1@1043   | 1.47E-14 | 0        |
| 13July2011 | 8983  | 931.78  | -28.5023 | 3 _VFGGK+1 chr5@3050    | 3.20E-10 | 0.008461 |
| 13July2011 | 12166 | 756.37  | -13.3372 | 3 _IPSAVGY( Splice@chr  | 2.72E-11 | 0.001065 |
| 13July2011 | 44    | 485.26  | 24.53639 | 3 K.ENIEKQPI chr4@1242  | 3.54E-10 | 0.009012 |
| 13July2011 | 2714  | 456.3   | 20.93878 | 2 R.RAAAPLR Splice@chr  | 2.75E-10 | 0.007695 |
| 13July2011 | 16602 | 873.48  | 25.16572 | 2 R.SIFVDLEP Splice@chr | 1.62E-10 | 0.005634 |
| 13July2011 | 17300 | 634.84  | 6.410455 | 2 R.VDIGDILF Splice@chr | 3.64E-11 | 0.00119  |
| 13July2011 | 1231  | 562.31  | -13.4391 | 2 R.FYLLLYLK Splice@chr | 5.56E-11 | 0.001868 |
| 13July2011 | 9437  | 897.42  | -27.6753 | 3 _QVREMH Splice@chr    | 2.67E-10 | 0.007576 |
| 13July2011 | 2292  | 412.23  | 25.3069  | 2 R.IASYQGG chrX@1679   | 4.55E-11 | 0.001461 |
| 13July2011 | 9383  | 897.42  | -27.6753 | 3 _QVREMH Splice@chr    | 3.93E-10 | 0.0093   |
| 13July2011 | 1285  | 530.76  | -26.2682 | 2 L.RADHTHF chr3@8398   | 4.15E-10 | 0.009631 |
| 13July2011 | 6082  | 696.83  | -11.9803 | 2 R.TDRTESV chr1@1452   | 1.61E-10 | 0.005634 |
| 13July2011 | 2472  | 735.33  | -27.5112 | 2 K.YGHANVI chr1@1065   | 1.76E-10 | 0.005738 |
| 13July2011 | 7645  | 626.68  | 23.52414 | 3 R.VVDALGI Splice@chr  | 3.22E-12 | 1.89E-04 |
| 13July2011 | 5249  | 665.02  | -27.3298 | 3 _K+14.016 chr2@9901   | 6.08E-11 | 0.002009 |
| 13July2011 | 12074 | 1134.06 | -5.36126 | 2 _IPSAVGY( Splice@chr  | 6.37E-18 | 0        |
| 13July2011 | 8556  | 703.87  | 11.02855 | 2 Y.VVQVAID chr1@1043   | 3.91E-14 | 0        |
| 13July2011 | 12058 | 756.37  | -13.3372 | 3 _IPSAVGY( Splice@chr  | 9.91E-11 | 0.003815 |
| 13July2011 | 11632 | 660.37  | -16.199  | 2 K.TK+14.01 chr1@1424  | 3.44E-10 | 0.008905 |
| 13July2011 | 3082  | 439.23  | -12.3957 | 2 R.IDDKTSAI chr5@8738  | 2.30E-10 | 0.006911 |
| 13July2011 | 15541 | 902.79  | -26.6077 | 3 K.RKLEYTIS Splice@chr | 3.11E-10 | 0.008461 |
| 13July2011 | 3711  | 527.29  | 11.90088 | 2 K.KLDLNM\ chr2@7182   | 2.19E-11 | 0.001065 |
| 13July2011 | 16101 | 643.37  | -18.6229 | 2 R.FSISLLFF/ chr2@1492 | 6.60E-11 | 0.002135 |

|            |       |         |          |                         |          |          |
|------------|-------|---------|----------|-------------------------|----------|----------|
| 13July2011 | 10129 | 501.63  | -6.98995 | 3 K.ILHFKVLC chr5@1670  | 5.26E-11 | 0.001868 |
| 13July2011 | 10713 | 805.42  | -12.2158 | 2 R.QISTCKSS Splice@chr | 2.38E-10 | 0.007256 |
| 13July2011 | 10473 | 805.43  | 0.227624 | 2 R.QISTCKSS Splice@chr | 1.33E-10 | 0.004411 |
| 13July2011 | 12633 | 858.48  | 6.006088 | 3 _LETGIKPI Splice@chr  | 3.63E-12 | 3.45E-04 |
| 13July2011 | 7115  | 724.35  | 19.12636 | 3 V.CLTEEGK Splice@chr  | 1.37E-10 | 0.004529 |
| 13July2011 | 8500  | 703.87  | 11.02855 | 2 Y.VVQVAID chr1@1045   | 3.88E-13 | 0        |
| 13July2011 | 12578 | 858.48  | 6.006088 | 3 _LETGIKPI Splice@chr  | 1.12E-11 | 4.93E-04 |
| 13July2011 | 12340 | 685.88  | 4.188613 | 2 K.IVPGGGA chrX@1570   | 4.53E-19 | 0        |
| 13July2011 | 5268  | 574.81  | -4.78661 | 2 K.NGPNNQ chrX@1712    | 2.75E-10 | 0.007695 |
| 13July2011 | 16386 | 792.15  | -18.5783 | 4 K.SGTIFDNI Splice@chr | 2.05E-11 | 9.42E-04 |
| 13July2011 | 12108 | 756.37  | -13.3372 | 3 _IPSAVGY Splice@chr   | 4.99E-11 | 0.001746 |
| 13July2011 | 9393  | 673.32  | -23.1345 | 4 _QVREMH Splice@chr    | 8.63E-11 | 0.003032 |
| 13July2011 | 12128 | 1134.06 | -5.36126 | 2 _IPSAVGY Splice@chr   | 3.73E-18 | 0        |
| 13July2011 | 2968  | 400.72  | -16.3384 | 2 K.LCVPGVR chr2@7704   | 4.12E-10 | 0.009631 |
| 13July2011 | 1547  | 530.77  | -7.37354 | 2 L.RADHTHF chr3@8398   | 1.33E-10 | 0.004411 |
| 13July2011 | 12379 | 484.28  | 10.44055 | 3 K.ISSAIAMF Splice@chr | 3.72E-10 | 0.005654 |
| 13July2011 | 18868 | 795.66  | -10.8901 | 4 K.SGTIFDNI Splice@chr | 5.66E-10 | 0.008504 |
| 13July2011 | 18021 | 787.89  | 24.95531 | 2 K.FWREIQM chrX@1650   | 1.23E-10 | 0.001343 |
| 13July2011 | 12013 | 573.83  | 11.89294 | 2 E.SPTIMTTI chrX@1024  | 1.92E-10 | 0.002248 |
| 13July2011 | 4961  | 463.74  | -28.7537 | 2 _FLVFESGI chr5@1959   | 2.09E-10 | 0.002702 |
| 13July2011 | 6843  | 520.78  | -0.87948 | 2 K.IALAYEM chr2@6701   | 3.09E-10 | 0.004692 |
| 13July2011 | 12030 | 660.37  | -16.199  | 2 K.TK+14.01 chr1@1424  | 5.08E-10 | 0.007944 |
| 13July2011 | 17642 | 792.15  | -18.5783 | 4 K.SGTIFDNI Splice@chr | 2.25E-10 | 0.003033 |
| 13July2011 | 11579 | 605.87  | -19.9793 | 2 V.PSILLYLLI chrX@1325 | 2.11E-10 | 0.002702 |
| 13July2011 | 12500 | 1134.06 | -5.36126 | 2 _IPSAVGY Splice@chr   | 7.36E-18 | 0        |
| 13July2011 | 1256  | 418.71  | -3.8722  | 2 R.WITSSDK chr1@4395   | 6.10E-10 | 0.008707 |
| 13July2011 | 6787  | 724.35  | 19.12636 | 3 V.CLTEEGK Splice@chr  | 5.59E-10 | 0.008437 |
| 13July2011 | 17212 | 792.16  | -5.99938 | 4 K.SGTIFDNI Splice@chr | 3.08E-11 | 6.78E-04 |
| 13July2011 | 833   | 562.31  | -13.4391 | 2 R.FYLLYLYK Splice@chr | 4.72E-11 | 9.13E-04 |
| 13July2011 | 17379 | 873.47  | 13.68595 | 2 R.SIFVDLEP Splice@chr | 1.84E-10 | 0.002248 |
| 13July2011 | 2815  | 526.79  | 15.09121 | 2 K.KLDLNM chr2@7182    | 4.45E-11 | 9.13E-04 |
| 13July2011 | 6901  | 724.35  | 19.12636 | 3 V.CLTEEGK Splice@chr  | 9.33E-11 | 0.001227 |
| 13July2011 | 18907 | 795.66  | -10.8901 | 4 K.SGTIFDNI Splice@chr | 6.61E-11 | 0.001155 |
| 13July2011 | 5077  | 463.74  | -28.7537 | 2 _FLVFESGI chr5@1959   | 1.69E-10 | 0.001912 |
| 13July2011 | 12803 | 685.88  | 4.188613 | 2 K.IVPGGGA chrX@1570   | 4.53E-19 | 0        |
| 13July2011 | 19260 | 996.85  | -7.09082 | 3 K.MGKLSTC chr1@4722   | 4.09E-10 | 0.006282 |
| 13July2011 | 5015  | 463.74  | -28.7537 | 2 _FLVFESGI chr5@1959   | 1.65E-10 | 0.001794 |
| 13July2011 | 12865 | 685.88  | 4.188613 | 2 K.IVPGGGA chrX@1570   | 6.15E-11 | 0.001034 |
| 13July2011 | 12594 | 756.37  | -13.3372 | 3 _IPSAVGY Splice@chr   | 9.37E-12 | 2.97E-04 |
| 13July2011 | 18942 | 795.66  | -10.8901 | 4 K.SGTIFDNI Splice@chr | 1.63E-10 | 0.001794 |
| 13July2011 | 12556 | 1134.06 | -5.36126 | 2 _IPSAVGY Splice@chr   | 7.40E-17 | 0        |
| 13July2011 | 12537 | 756.37  | -13.3372 | 3 _IPSAVGY Splice@chr   | 1.40E-12 | 0        |
| 13July2011 | 17165 | 792.15  | -18.5783 | 4 K.SGTIFDNI Splice@chr | 2.03E-11 | 5.56E-04 |
| 13July2011 | 2096  | 400.72  | 7.024146 | 2 _SDAVPGV Splice@chr   | 5.26E-11 | 9.13E-04 |
| 13July2011 | 4206  | 693.87  | -6.6949  | 2 V.ICVAVGD chr5@1065   | 6.79E-12 | 2.97E-04 |
| 13July2011 | 939   | 530.77  | -7.37354 | 2 L.RADHTHF chr3@8398   | 9.51E-11 | 0.001227 |
| 13July2011 | 13398 | 894     | -12.2343 | 2 _VETGIKPI Splice@chr  | 3.55E-11 | 8.06E-04 |

|            |       |         |          |                         |          |          |
|------------|-------|---------|----------|-------------------------|----------|----------|
| 13July2011 | 10494 | 671.37  | -24.0361 | 2 T.FNIVHTQ Splice@chr  | 2.95E-10 | 0.004354 |
| 13July2011 | 13088 | 858.48  | 6.006088 | 3 _LETGIKPI Splice@chr  | 1.82E-10 | 0.002137 |
| 13July2011 | 6835  | 724.35  | 19.12636 | 3 V.CLTEEGK Splice@chr  | 1.27E-10 | 0.001343 |
| 13July2011 | 12746 | 685.88  | 4.188613 | 2 K.IVPGGGA chrX@1570   | 1.90E-15 | 0        |
| 13July2011 | 13165 | 644.11  | 2.967857 | 4 _LETGIKPI Splice@chr  | 6.18E-10 | 0.008802 |
| 13July2011 | 13144 | 858.48  | 6.006088 | 3 _LETGIKPI Splice@chr  | 2.13E-11 | 5.56E-04 |
| 13July2011 | 12614 | 1134.05 | -14.1995 | 2 _IPSAVGY Splice@chr   | 1.35E-18 | 0        |
| 13July2011 | 631   | 466.77  | 16.90491 | 2 K.TADKTQI Splice@chr  | 8.59E-11 | 0.001227 |
| 13July2011 | 8165  | 703.87  | 11.02855 | 2 Y.VVQVAID chr1@1043   | 1.32E-15 | 0        |
| 13July2011 | 4617  | 547.79  | 14.47103 | 2 K.AISFVGGI chr2@1172  | 1.80E-10 | 0.002137 |
| 13July2011 | 5504  | 696.83  | -11.9803 | 2 R.TDRTEVS chr1@1452   | 6.68E-10 | 0.009838 |
| 13July2011 | 11915 | 660.37  | -16.199  | 2 K.TK+14.01 chr1@1424  | 5.00E-10 | 0.007944 |
| 13July2011 | 5286  | 417.21  | -4.25277 | 2 K.WAKDGE chr5@1945    | 1.23E-10 | 0.001343 |
| 13July2011 | 894   | 562.31  | -13.4391 | 2 R.FYLLLYLK Splice@chr | 4.72E-11 | 9.13E-04 |
| 13July2011 | 7522  | 593.84  | -9.57474 | 2 R.NEIVFQV chrX@1474   | 1.32E-10 | 0.001575 |
| 13July2011 | 1739  | 735.33  | -27.5112 | 2 K.YGHANVI chr1@1065   | 5.65E-10 | 0.008504 |
| 13July2011 | 12481 | 756.37  | -13.3372 | 3 _IPSAVGY Splice@chr   | 1.75E-11 | 5.56E-04 |
| 13July2011 | 18117 | 634.84  | 6.410455 | 2 R.VDIGDILF Splice@chr | 1.92E-10 | 0.002248 |
| 13July2011 | 3343  | 728.71  | 2.602274 | 3 K.TPSEQQA chr1@1348   | 2.07E-16 | 0        |
| 13July2011 | 4155  | 693.87  | -6.6949  | 2 V.ICVAVGD chr5@1063   | 8.19E-11 | 0.001227 |
| 13July2011 | 11954 | 573.83  | 11.89294 | 2 E.SPTIMTTI chrX@1024  | 4.30E-10 | 0.006695 |
| 13July2011 | 10188 | 501.63  | -6.98995 | 3 K.ILHFKVLC chr5@1670  | 4.71E-10 | 0.007411 |
| 13July2011 | 9541  | 897.43  | -16.505  | 3 _QVREMH Splice@chr    | 6.19E-10 | 0.008802 |
| 13July2011 | 8111  | 703.87  | 11.02855 | 2 Y.VVQVAID chr1@1043   | 3.12E-15 | 0        |
| 13July2011 | 5346  | 417.21  | -4.25277 | 2 K.WAKDGE chr5@1945    | 5.00E-10 | 0.007944 |
| 13July2011 | 11971 | 660.37  | -16.199  | 2 K.TK+14.01 chr1@1424  | 4.46E-10 | 0.006802 |
| 13July2011 | 13202 | 858.48  | 6.006088 | 3 _LETGIKPI Splice@chr  | 8.89E-12 | 2.97E-04 |
| 13July2011 | 18829 | 795.66  | -10.8901 | 4 K.SGTIFDNI Splice@chr | 2.16E-11 | 5.56E-04 |
| 13July2011 | 10286 | 501.63  | -6.98995 | 3 K.ILHFKVLC chr5@1670  | 4.61E-10 | 0.007615 |
| 13July2011 | 4691  | 693.87  | -6.6949  | 2 V.ICVAVGD chr5@1063   | 2.44E-10 | 0.003938 |
| 13July2011 | 11624 | 605.87  | -19.9793 | 2 V.PSILLYLLI chrX@1323 | 2.45E-10 | 0.003938 |
| 13July2011 | 1323  | 530.76  | -26.2682 | 2 L.RADHTHF chr3@8398   | 3.41E-10 | 0.006286 |
| 13July2011 | 19279 | 795.66  | -10.8901 | 4 K.SGTIFDNI Splice@chr | 2.17E-10 | 0.003605 |
| 13July2011 | 16469 | 849.42  | 8.560987 | 2 Q.DSSYFVE Splice@chr  | 2.28E-10 | 0.003718 |
| 13July2011 | 1572  | 418.71  | -3.8722  | 2 R.WITSSDK chr1@4395   | 5.22E-10 | 0.008675 |
| 13July2011 | 11077 | 555.32  | -20.8823 | 2 _FVPGIPLI chr2@1311   | 9.24E-11 | 0.001283 |
| 13July2011 | 5519  | 463.74  | -28.7537 | 2 _FLVFESGI chr5@1955   | 4.99E-10 | 0.008352 |
| 13July2011 | 13123 | 858.48  | 6.006088 | 3 _LETGIKPI Splice@chr  | 2.19E-11 | 2.90E-04 |
| 13July2011 | 13381 | 894.5   | -14.1127 | 2 _VETGIKPI Splice@chr  | 8.16E-12 | 0        |
| 13July2011 | 12785 | 685.88  | 4.188613 | 2 K.IVPGGGA chrX@1570   | 1.00E-18 | 0        |
| 13July2011 | 7172  | 724.35  | 19.12636 | 3 V.CLTEEGK Splice@chr  | 5.35E-12 | 0        |
| 13July2011 | 1288  | 562.31  | -13.4391 | 2 R.FYLLLYLK Splice@chr | 6.40E-11 | 0.001167 |
| 13July2011 | 10666 | 671.37  | -24.0361 | 2 T.FNIVHTQ Splice@chr  | 5.08E-10 | 0.008352 |
| 13July2011 | 609   | 531.28  | 8.35486  | 2 L.RADHTHF chr3@8398   | 6.95E-11 | 0.001167 |
| 13July2011 | 2725  | 400.72  | -16.3384 | 2 K.LCVPGVR chr2@7704   | 4.75E-10 | 0.007827 |
| 13July2011 | 10992 | 805.42  | -12.2158 | 2 R.QISTCKSS Splice@chr | 2.10E-10 | 0.003501 |
| 13July2011 | 2742  | 731.41  | -4.43201 | 1 _KDATAPK chr3@7055    | 4.72E-10 | 0.007827 |

|            |       |         |          |                         |          |          |
|------------|-------|---------|----------|-------------------------|----------|----------|
| 13July2011 | 13315 | 664.7   | 1.197202 | 3 _PTLNK+1 chr1@6526    | 4.37E-10 | 0.006867 |
| 13July2011 | 16830 | 1003.19 | 17.13413 | 3 R.CWNRRA Splice@chr   | 2.15E-11 | 2.90E-04 |
| 13July2011 | 13009 | 858.48  | 6.006088 | 3 _LETGIKPI Splice@chr  | 5.59E-14 | 0        |
| 13July2011 | 10561 | 671.37  | -24.0361 | 2 T.FNIVHTQ Splice@chr  | 6.15E-10 | 0.009809 |
| 13July2011 | 6749  | 679.84  | -28.5013 | 2 K.FEK+14.0 chr3@5395  | 1.36E-10 | 0.00211  |
| 13July2011 | 7811  | 593.84  | -9.57474 | 2 R.NEIVFQV chrX@1474   | 2.18E-10 | 0.003605 |
| 13July2011 | 16366 | 665.37  | -26.6417 | 2 Q.INNK+14 Splice@chr  | 9.56E-11 | 0.00141  |
| 13July2011 | 16419 | 849.92  | 6.583873 | 2 Q.DSSYFVE Splice@chr  | 3.42E-11 | 8.27E-04 |
| 13July2011 | 13434 | 894     | -12.2343 | 2 _VETGIKPI Splice@chr  | 3.30E-10 | 0.006066 |
| 13July2011 | 1352  | 562.31  | -13.4391 | 2 R.FYLLYLYK Splice@chr | 4.72E-11 | 0.001167 |
| 13July2011 | 5895  | 696.83  | -11.9803 | 2 R.TDRTEVS chr1@1452   | 3.79E-10 | 0.006675 |
| 13July2011 | 12971 | 664.7   | 1.197202 | 3 _PTLNK+1 chr1@6526    | 6.65E-11 | 0.001167 |
| 13July2011 | 13142 | 664.7   | 1.197202 | 3 _PTLNK+1 chr1@6526    | 1.18E-10 | 0.001757 |
| 13July2011 | 12592 | 1134.06 | -5.36126 | 2 _IPSAVGY Splice@chr   | 3.03E-18 | 0        |
| 13July2011 | 10010 | 679.35  | -27.2747 | 3 K.PEPEPEPI chr2@4275  | 3.91E-10 | 0.006675 |
| 13July2011 | 5007  | 580.27  | 26.13171 | 2 K.YEYSEQN chr2@9837   | 4.99E-10 | 0.008352 |
| 13July2011 | 10613 | 671.37  | -24.0361 | 2 T.FNIVHTQ Splice@chr  | 5.91E-10 | 0.009614 |
| 13July2011 | 12139 | 660.37  | -16.199  | 2 K.TK+14.01 chr1@1424  | 1.71E-10 | 0.00245  |
| 13July2011 | 7758  | 593.84  | -9.57474 | 2 R.NEIVFQV chrX@1474   | 5.26E-10 | 0.008675 |
| 13July2011 | 12618 | 664.37  | 7.851479 | 3 _PTLNK+1 chr1@6526    | 2.39E-11 | 4.31E-04 |
| 13July2011 | 5558  | 862.49  | -11.4066 | 1 _KSNSLVS chr3@7285    | 5.41E-10 | 0.008989 |
| 13July2011 | 8436  | 703.87  | 11.02855 | 2 Y.VVQVAID chr1@1045   | 1.63E-14 | 0        |
| 13July2011 | 17936 | 634.84  | 6.410455 | 2 R.VDIGDILF Splice@chr | 7.05E-11 | 0.001167 |
| 13July2011 | 17851 | 787.89  | 24.95531 | 2 K.FWREIQN chrX@1650   | 5.55E-10 | 0.009087 |
| 13July2011 | 8494  | 703.87  | 11.02855 | 2 Y.VVQVAID chr1@1045   | 1.40E-15 | 0        |
| 13July2011 | 12538 | 1134.06 | -5.36126 | 2 _IPSAVGY Splice@chr   | 2.98E-17 | 0        |
| 13July2011 | 3400  | 527.29  | 11.90088 | 2 K.KLDLNM chr2@7182    | 2.19E-11 | 2.90E-04 |
| 13July2011 | 4527  | 454.75  | 8.810814 | 2 K.TDLAYLG chr4@1545   | 6.05E-11 | 0.001167 |
| 13July2011 | 12023 | 660.37  | -16.199  | 2 K.TK+14.01 chr1@1424  | 3.63E-10 | 0.00649  |
| 13July2011 | 7117  | 724.35  | 19.12636 | 3 V.CLTEEGK Splice@chr  | 2.62E-11 | 5.62E-04 |
| 13July2011 | 12730 | 685.88  | 4.188613 | 2 K.IVPGGGA chrX@1570   | 1.56E-15 | 0        |
| 13July2011 | 16995 | 1003.19 | 17.13413 | 3 R.CWNRRA Splice@chr   | 1.60E-10 | 0.00245  |
| 13July2011 | 3461  | 527.29  | 11.90088 | 2 K.KLDLNM chr2@7182    | 2.19E-11 | 2.90E-04 |
| 13July2011 | 11969 | 660.87  | -18.7429 | 2 K.TK+14.01 chr1@1424  | 2.86E-10 | 0.005067 |
| 13July2011 | 5743  | 417.21  | -4.25277 | 2 K.WAKDGE chr5@1945    | 4.24E-11 | 0.001167 |
| 13July2011 | 13067 | 858.48  | 6.006088 | 3 _LETGIKPI Splice@chr  | 4.81E-14 | 0        |
| 13July2011 | 12635 | 883.47  | -2.59393 | 2 N.RRAFGV Splice@chr   | 5.40E-10 | 0.008989 |
| 13July2011 | 13184 | 858.48  | 6.006088 | 3 _LETGIKPI Splice@chr  | 6.84E-12 | 0        |
| 13July2011 | 7865  | 556.83  | 14.93446 | 2 K.VIVVYAA chr3@8274   | 1.35E-11 | 1.50E-04 |
| 13July2011 | 12588 | 484.28  | 10.44055 | 3 K.ISSAIAMF Splice@chr | 2.08E-10 | 0.003422 |
| 13July2011 | 9787  | 673.32  | -23.1345 | 4 _QVREMH Splice@chr    | 1.78E-10 | 0.002814 |
| 13July2011 | 16000 | 1143.88 | 13.05325 | 3 K.NMITGTS Splice@chr  | 3.15E-11 | 6.06E-04 |
| 13July2011 | 5059  | 575.31  | -7.7099  | 2 K.NGPNNQ chrX@1712    | 2.56E-10 | 0.004009 |
| 13July2011 | 7297  | 724.35  | 19.12636 | 3 V.CLTEEGK Splice@chr  | 1.27E-10 | 0.002422 |
| 13July2011 | 12674 | 1134.06 | -5.36126 | 2 _IPSAVGY Splice@chr   | 3.17E-19 | 0        |
| 13July2011 | 7582  | 560.61  | -4.36273 | 3 _EMFSAA chr4@3415     | 1.18E-10 | 0.002335 |
| 13July2011 | 12187 | 660.37  | -16.199  | 2 K.TK+14.01 chr1@1424  | 6.36E-10 | 0.009671 |

|            |       |         |          |                         |          |          |
|------------|-------|---------|----------|-------------------------|----------|----------|
| 13July2011 | 1644  | 401.74  | 27.30093 | 2 R.IEAGGGC chr5@8776   | 3.05E-10 | 0.004597 |
| 13July2011 | 14260 | 849.43  | 17.00957 | 3 K.M+15.99 chr5@9896   | 3.40E-11 | 6.06E-04 |
| 13July2011 | 13242 | 858.48  | 6.006088 | 3 _LETGIIKPI Splice@chr | 1.13E-13 | 0        |
| 13July2011 | 12206 | 573.83  | 11.89294 | 2 E.SPTIMTTI chrX@1024  | 2.15E-10 | 0.003422 |
| 13July2011 | 19213 | 795.66  | -10.8901 | 4 K.SGTIFDNI Splice@chr | 6.65E-12 | 0        |
| 13July2011 | 3780  | 728.71  | 2.602274 | 3 K.TPSEQQA chr1@1348   | 8.10E-17 | 0        |
| 13July2011 | 13303 | 858.48  | 6.006088 | 3 _LETGIIKPI Splice@chr | 4.45E-12 | 0        |
| 13July2011 | 19086 | 791.91  | -4.93896 | 4 K.SGTIFDNI Splice@chr | 5.65E-14 | 0        |
| 13July2011 | 18285 | 634.84  | 6.410455 | 2 R.VDIGDILF Splice@chr | 1.67E-12 | 0        |
| 13July2011 | 12268 | 573.83  | 11.89294 | 2 E.SPTIMTTI chrX@1024  | 5.72E-10 | 0.008524 |
| 13July2011 | 5525  | 463.74  | -28.7537 | 2 _FLVFESGI chr5@1959   | 4.93E-10 | 0.007285 |
| 13July2011 | 13184 | 858.48  | 6.006088 | 3 _LETGIIKPI Splice@chr | 1.25E-11 | 1.30E-04 |
| 13July2011 | 12726 | 1134.06 | -5.36126 | 2 _IPSAVGYC Splice@chr  | 8.07E-18 | 0        |
| 13July2011 | 5166  | 574.81  | -4.78661 | 2 K.NGPNNQ chrX@1712    | 3.33E-11 | 6.06E-04 |
| 13July2011 | 7028  | 421.58  | 18.35064 | 3 _EIVGMPA chr5@4046    | 3.48E-11 | 6.06E-04 |
| 13July2011 | 1546  | 418.71  | -3.8722  | 2 R.WITSSDK chr1@4395   | 5.40E-10 | 0.008242 |
| 13July2011 | 19236 | 792.15  | -18.5783 | 4 K.SGTIFDNI Splice@chr | 3.60E-12 | 0        |
| 13July2011 | 2112  | 735.33  | -27.5112 | 2 K.YGHANVI chr1@1065   | 3.77E-10 | 0.005452 |
| 13July2011 | 18208 | 787.89  | 24.95531 | 2 K.FWREIQM chrX@1650   | 6.49E-11 | 0.001394 |
| 13July2011 | 3322  | 526.78  | -3.83085 | 2 K.KLDLNM\ chr2@7182   | 2.19E-11 | 3.77E-04 |
| 13July2011 | 12957 | 685.88  | 4.188613 | 2 K.IVPGGGA chrX@1570   | 4.87E-18 | 0        |
| 13July2011 | 15435 | 613.84  | -15.9157 | 4 _LM+15.9\ Splice@chr  | 2.59E-10 | 0.00411  |
| 13July2011 | 10948 | 671.37  | -24.0361 | 2 T.FNIVHTQ Splice@chr  | 2.60E-10 | 0.00411  |
| 13July2011 | 10716 | 671.37  | -24.0361 | 2 T.FNIVHTQ Splice@chr  | 2.17E-10 | 0.00363  |
| 13July2011 | 19705 | 792.15  | -18.5783 | 4 K.SGTIFDNI Splice@chr | 3.32E-10 | 0.005079 |
| 13July2011 | 16830 | 849.42  | 8.560987 | 2 Q.DSSYFVE Splice@chr  | 2.93E-13 | 0        |
| 13July2011 | 7348  | 724.35  | 19.12636 | 3 V.CLTEEGK Splice@chr  | 1.65E-11 | 3.77E-04 |
| 13July2011 | 18988 | 1074.07 | 18.6568  | 2 K.YFKINILEI chr2@1186 | 5.25E-11 | 0.001051 |
| 13July2011 | 10866 | 851.49  | -3.4814  | 2 K.RGVRLSH chr2@2785   | 6.48E-10 | 0.009865 |
| 13July2011 | 10923 | 851.49  | -3.4814  | 2 K.RGVRLSH chr2@2785   | 8.19E-11 | 0.001695 |
| 13July2011 | 18327 | 634.84  | 6.410455 | 2 R.VDIGDILF Splice@chr | 1.01E-12 | 0        |
| 13July2011 | 3731  | 728.71  | 2.602274 | 3 K.TPSEQQA chr1@1348   | 1.94E-14 | 0        |
| 13July2011 | 608   | 486.8   | -3.32946 | 2 R.KNREKAV chr3@9236   | 4.37E-10 | 0.006222 |
| 13July2011 | 461   | 586.3   | -20.8197 | 2 K.NHRNQN chr2@3880    | 5.51E-10 | 0.008338 |
| 13July2011 | 5109  | 574.81  | -4.78661 | 2 K.NGPNNQ chrX@1712    | 1.62E-10 | 0.002814 |
| 13July2011 | 6113  | 403.46  | -23.4306 | 4 R.K+14.016 Splice@chr | 8.75E-11 | 0.001695 |
| 13July2011 | 15772 | 849.92  | 6.583873 | 2 Q.DSSYFVE Splice@chr  | 1.09E-11 | 1.30E-04 |
| 13July2011 | 2541  | 400.72  | 7.024146 | 2 _SDAVPG\ Splice@chr   | 4.59E-11 | 9.45E-04 |
| 13July2011 | 19093 | 795.66  | -10.8901 | 4 K.SGTIFDNI Splice@chr | 2.26E-11 | 3.77E-04 |
| 13July2011 | 1182  | 562.31  | -13.4391 | 2 R.FYLLLYLK Splice@chr | 4.72E-11 | 9.45E-04 |
| 13July2011 | 15823 | 849.42  | 8.560987 | 2 Q.DSSYFVE Splice@chr  | 6.25E-10 | 0.009486 |
| 13July2011 | 7825  | 651.38  | 9.534514 | 2 K.KEAVILEL chrX@1506  | 5.28E-10 | 0.007961 |
| 13July2011 | 11786 | 605.87  | -19.9793 | 2 V.PSILLYLLI chrX@1323 | 3.68E-10 | 0.005452 |
| 13July2011 | 11217 | 555.32  | -20.8823 | 2 _FVPGIPLI chr2@1311   | 8.20E-11 | 0.001695 |
| 13July2011 | 2489  | 400.72  | 7.024146 | 2 _SDAVPG\ Splice@chr   | 4.59E-11 | 9.45E-04 |
| 13July2011 | 7526  | 560.61  | -4.36273 | 3 _EMFSAA\ chr4@3419    | 1.27E-11 | 1.30E-04 |
| 13July2011 | 19059 | 795.66  | -2.97654 | 4 K.SGTIFDNI Splice@chr | 6.60E-11 | 0.001508 |

|            |       |         |          |                         |          |          |
|------------|-------|---------|----------|-------------------------|----------|----------|
| 13July2011 | 13145 | 664.7   | 1.197202 | 3 _PTLNK+1. chr1@6526   | 9.83E-11 | 0.001792 |
| 13July2011 | 13085 | 664.7   | 1.197202 | 3 _PTLNK+1. chr1@6526   | 5.96E-10 | 0.009197 |
| 13July2011 | 17841 | 795.66  | -2.97654 | 4 K.SGTIFDNI Splice@chr | 1.85E-11 | 2.81E-04 |
| 13July2011 | 17179 | 634.84  | 6.410455 | 2 R.VDIGDILF Splice@chr | 6.02E-11 | 0.001337 |
| 13July2011 | 11321 | 605.87  | -19.9793 | 2 V.PSILLYLLI chrX@1323 | 3.14E-10 | 0.008133 |
| 13July2011 | 1274  | 562.31  | -13.4391 | 2 R.FYLLYLYK Splice@chr | 5.56E-11 | 9.44E-04 |
| 13July2011 | 15816 | 849.92  | 6.583873 | 2 Q.DSSYFVE Splice@chr  | 1.95E-11 | 2.81E-04 |
| 13July2011 | 5142  | 574.81  | -4.78661 | 2 K.NGPNNQ chrX@1712    | 1.41E-10 | 0.003372 |
| 13July2011 | 18520 | 1042.9  | 19.47576 | 3 F.SMKEIKN chr2@1118   | 3.78E-10 | 0.009643 |
| 13July2011 | 7529  | 651.38  | 9.534514 | 2 K.KEAVILEL chrX@1506  | 1.29E-10 | 0.002766 |
| 13July2011 | 18008 | 795.66  | -10.8901 | 4 K.SGTIFDNI Splice@chr | 8.00E-11 | 0.002094 |
| 13July2011 | 12664 | 664.7   | 1.197202 | 3 _PTLNK+1. chr1@6526   | 3.28E-10 | 0.008347 |
| 13July2011 | 8841  | 931.78  | -28.5023 | 3 _VFGGK+1 chr5@3050    | 1.94E-10 | 0.004892 |
| 13July2011 | 12366 | 685.88  | 4.188613 | 2 K.IVPGGGA chrX@1570   | 4.53E-19 | 0        |
| 13July2011 | 12110 | 1134.05 | -14.1995 | 2 _IPSAVGYI Splice@chr  | 1.50E-16 | 0        |
| 13July2011 | 17794 | 795.66  | -10.8901 | 4 K.SGTIFDNI Splice@chr | 1.21E-11 | 0        |
| 13July2011 | 12169 | 1134.06 | -5.36126 | 2 _IPSAVGYI Splice@chr  | 3.02E-16 | 0        |
| 13July2011 | 14871 | 849.42  | 8.560987 | 2 Q.DSSYFVE Splice@chr  | 9.82E-11 | 0.002307 |
| 13July2011 | 9301  | 673.32  | -23.1345 | 4 _QVREMH Splice@chr    | 1.53E-10 | 0.003732 |
| 13July2011 | 12592 | 858.48  | 6.006088 | 3 _LETGIKPI Splice@chr  | 4.43E-12 | 0        |
| 13July2011 | 2528  | 456.3   | 20.93878 | 2 R.RAAAPLR Splice@chr  | 1.08E-10 | 0.002414 |
| 13July2011 | 669   | 495.26  | -0.67919 | 2 _RDEAQSK Splice@chr   | 1.03E-10 | 0.002307 |
| 13July2011 | 15868 | 849.42  | 8.560987 | 2 Q.DSSYFVE Splice@chr  | 4.58E-13 | 0        |
| 13July2011 | 7524  | 626.68  | 23.52414 | 3 R.VVDALGI Splice@chr  | 9.54E-14 | 0        |
| 13July2011 | 5085  | 574.81  | -4.78661 | 2 K.NGPNNQ chrX@1712    | 3.80E-10 | 0.009643 |
| 13July2011 | 2164  | 403.73  | 18.64179 | 2 _VSASSSIR chr5@1478   | 3.31E-10 | 0.008347 |
| 13July2011 | 7296  | 560.61  | -4.36273 | 3 _EMFSAAI chr4@3419    | 2.76E-10 | 0.007125 |
| 13July2011 | 12649 | 858.48  | 6.006088 | 3 _LETGIKPI Splice@chr  | 1.71E-11 | 2.81E-04 |
| 13July2011 | 3895  | 728.71  | 2.602274 | 3 K.TPSEQQA chr1@1348   | 6.67E-13 | 0        |
| 13July2011 | 8981  | 574.81  | 19.18282 | 4 K.TK+14.01 chr5@4987  | 1.25E-10 | 0.002766 |
| 13July2011 | 12312 | 685.88  | 4.188613 | 2 K.IVPGGGA chrX@1570   | 3.65E-17 | 0        |
| 13July2011 | 1331  | 562.31  | -13.4391 | 2 R.FYLLYLYK Splice@chr | 4.72E-11 | 8.19E-04 |
| 13July2011 | 901   | 466.77  | 16.90491 | 2 K.TADKTQI Splice@chr  | 1.72E-10 | 0.004683 |
| 13July2011 | 7006  | 724.35  | 19.12636 | 3 V.CLTEEGK Splice@chr  | 1.28E-12 | 0        |
| 13July2011 | 10155 | 894     | -12.2343 | 2 _VETGIKPI Splice@chr  | 2.42E-11 | 0.001491 |
| 13July2011 | 9885  | 664.7   | 1.197202 | 3 _PTLNK+1. chr1@6526   | 1.05E-10 | 0.003708 |
| 13July2011 | 550   | 466.77  | 16.90491 | 2 K.TADKTQI Splice@chr  | 2.72E-10 | 0.007809 |
| 13July2011 | 1509  | 735.33  | -27.5112 | 2 K.YGHANVI chr1@1065   | 1.89E-10 | 0.006372 |
| 13July2011 | 9926  | 858.48  | 6.006088 | 3 _LETGIKPI Splice@chr  | 2.79E-10 | 0.008156 |
| 13July2011 | 7294  | 897.42  | -27.6753 | 3 _QVREMH Splice@chr    | 3.70E-11 | 0.00172  |
| 13July2011 | 9982  | 858.48  | 6.006088 | 3 _LETGIKPI Splice@chr  | 4.34E-11 | 0.001932 |
| 13July2011 | 7786  | 515.62  | 14.07456 | 3 _QNLSLFFI Splice@chr  | 2.75E-10 | 0.008156 |
| 13July2011 | 3469  | 693.87  | -6.6949  | 2 V.ICVAVGD chr5@1063   | 1.89E-10 | 0.006372 |
| 13July2011 | 1114  | 409.74  | -10.6768 | 2 K.MVITNLK Splice@chr  | 2.70E-10 | 0.007809 |
| 13July2011 | 3224  | 468.78  | 18.7467  | 2 K.ISGKFDIR chrX@1561  | 2.61E-10 | 0.007809 |
| 13July2011 | 2943  | 626.3   | -9.76097 | 2 R.LCESGAA Splice@chr  | 3.46E-15 | 0        |
| 13July2011 | 9106  | 573.83  | 11.89294 | 2 E.SPTIMTTI chrX@1024  | 2.20E-10 | 0.006926 |

|            |       |         |          |                         |          |          |
|------------|-------|---------|----------|-------------------------|----------|----------|
| 13July2011 | 842   | 562.31  | -13.4391 | 2 R.FYLLYLYK Splice@chr | 6.30E-11 | 0.002995 |
| 13July2011 | 2899  | 626.3   | -9.76097 | 2 R.LCESGAA Splice@chr  | 9.33E-16 | 0        |
| 13July2011 | 1874  | 439.74  | 18.7116  | 2 R.SIAMFGP chr2@4157   | 1.45E-10 | 0.005207 |
| 13July2011 | 10794 | 902.46  | -21.5757 | 3 K.RKLEYTIS Splice@chr | 7.68E-12 | 0        |
| 13July2011 | 11477 | 849.42  | 8.560987 | 2 Q.DSSYFVE Splice@chr  | 3.47E-11 | 4.03E-04 |
| 13July2011 | 969   | 562.31  | -13.4391 | 2 R.FYLLYLYK chr5@5138  | 2.17E-10 | 0.008572 |
| 13July2011 | 4574  | 403.71  | -25.5146 | 4 R.K+14.016 chr5@1975  | 1.53E-11 | 0        |
| 13July2011 | 2924  | 626.3   | -9.76097 | 2 R.LCESGAA Splice@chr  | 1.59E-14 | 0        |
| 13July2011 | 9343  | 664.7   | 1.197202 | 3 _PTLNK+1 chr1@6526    | 1.22E-10 | 0.003879 |
| 13July2011 | 9141  | 664.7   | 1.197202 | 3 _PTLNK+1 chr1@6526    | 6.43E-11 | 0.001808 |
| 13July2011 | 9297  | 664.7   | 1.197202 | 3 _PTLNK+1 chr1@6526    | 9.29E-11 | 0.001808 |
| 13July2011 | 4528  | 403.46  | -23.4306 | 4 R.K+14.016 chr5@1975  | 1.48E-10 | 0.005513 |
| 13July2011 | 2973  | 626.3   | -9.76097 | 2 R.LCESGAA Splice@chr  | 6.10E-14 | 0        |
| 13July2011 | 3457  | 693.87  | -6.6949  | 2 V.ICVAVGD chr5@1063   | 1.44E-10 | 0.005207 |
| 13July2011 | 11138 | 693.43  | 22.25478 | 3 R.GFTPM+ chr4@7821    | 1.21E-10 | 0.00393  |
| 13July2011 | 11189 | 693.43  | 22.25478 | 3 R.GFTPM+ chr4@7821    | 1.49E-10 | 0.004505 |
| 13July2011 | 837   | 562.31  | -13.4391 | 2 R.FYLLYLYK Splice@chr | 5.21E-11 | 0.001988 |
| 13July2011 | 10768 | 858.48  | 6.006088 | 3 _LETGIKPI Splice@chr  | 1.43E-10 | 0.004505 |
| 13July2011 | 6272  | 557.32  | -8.88674 | 2 R.LLIEYIGH chr1@3828  | 2.25E-10 | 0.005801 |
| 13July2011 | 11831 | 763.48  | -1.96108 | 2 K.EKSLKIKIF chr1@3515 | 3.85E-10 | 0.008974 |
| 13July2011 | 1452  | 412.23  | 25.3069  | 2 R.IASYQGG chrX@1679   | 3.03E-11 | 0.001146 |
| 13July2011 | 2305  | 433.76  | 2.609238 | 2 _IVDLP GPI chr3@1104  | 3.53E-10 | 0.007956 |
| 13July2011 | 10816 | 858.48  | 6.006088 | 3 _LETGIKPI Splice@chr  | 1.01E-12 | 0        |
| 13July2011 | 6282  | 509.8   | -23.773  | 2 R.SSVIMLIV chr2@5767  | 5.59E-11 | 0.001988 |
| 13July2011 | 10491 | 685.88  | 4.188613 | 2 K.IVPGGGA chrX@1570   | 3.84E-17 | 0        |
| 13July2011 | 14598 | 787.89  | 24.95531 | 2 K.FWREIQM chrX@1650   | 3.11E-10 | 0.007386 |
| 13July2011 | 2599  | 527.29  | 11.90088 | 2 K.KLDLNM chr2@7182    | 2.26E-11 | 0.001146 |
| 13July2011 | 8887  | 671.37  | -24.0361 | 2 T.FNIVHTQ Splice@chr  | 3.64E-10 | 0.008559 |
| 13July2011 | 336   | 586.3   | -20.8197 | 2 K.NHRNQN chr2@3880    | 1.77E-10 | 0.005278 |
| 13July2011 | 6334  | 509.8   | -23.773  | 2 R.SSVIMLIV chr2@5767  | 3.76E-11 | 0.001494 |
| 13July2011 | 355   | 531.28  | 8.35486  | 2 L.RADHTHF chr3@8398   | 2.70E-10 | 0.006529 |
| 13July2011 | 1489  | 527.64  | 26.73432 | 3 R.KSLPLK+1 chr5@1824  | 2.21E-10 | 0.005801 |
| 13July2011 | 10540 | 685.88  | 4.188613 | 2 K.IVPGGGA chrX@1570   | 1.00E-18 | 0        |
| 13July2011 | 4370  | 696.37  | -15.3603 | 2 _LPTSPIGD chr5@1204   | 3.27E-10 | 0.007507 |
| 13July2011 | 9794  | 1128.05 | 6.854678 | 2 _IPSAVGY Splice@chr   | 4.03E-11 | 0.001494 |
| 13July2011 | 819   | 589.81  | 17.0687  | 2 H.NCLTEAT chr1@6483   | 2.08E-10 | 0.006216 |
| 13July2011 | 6801  | 717.42  | -20.7021 | 2 _KLDLTYEI chrX@2081   | 2.74E-11 | 0.001027 |
| 13July2011 | 5638  | 696.83  | -11.9803 | 2 R.TDRTESV chr1@1452   | 3.25E-10 | 0.008891 |
| 13July2011 | 3488  | 499.24  | -1.53129 | 2 K.SSTCSKA Splice@chr  | 1.63E-10 | 0.005631 |
| 13July2011 | 6852  | 717.42  | -20.7021 | 2 _KLDLTYEI chrX@2081   | 2.49E-10 | 0.006216 |
| 13July2011 | 2020  | 527.64  | 26.73432 | 3 R.KSLPLK+1 chr5@1824  | 1.39E-10 | 0.005631 |
| 13July2011 | 1257  | 562.31  | -13.4391 | 2 R.FYLLYLYK Splice@chr | 8.73E-11 | 0.003611 |
| 13July2011 | 7309  | 626.68  | 23.52414 | 3 R.VVDALGI Splice@chr  | 2.31E-11 | 7.03E-04 |
| 13July2011 | 1278  | 530.76  | -26.2682 | 2 L.RADHTHF chr3@8398   | 9.71E-12 | 7.03E-04 |
| 13July2011 | 3376  | 527.29  | 11.90088 | 2 K.KLDLNM chr2@7182    | 2.19E-11 | 7.03E-04 |
| 13July2011 | 8148  | 703.87  | 11.02855 | 2 Y.VVQVAID chr1@1043   | 1.24E-12 | 0        |
| 13July2011 | 2549  | 400.72  | 7.024146 | 2 _SDAVPGV Splice@chr   | 1.80E-11 | 7.03E-04 |

|            |       |         |          |                          |          |          |
|------------|-------|---------|----------|--------------------------|----------|----------|
| 13July2011 | 2846  | 526.78  | -3.83085 | 2 K.KLDLNM\ chr2@7182    | 4.38E-11 | 0.001025 |
| 13July2011 | 4508  | 463.74  | -28.7537 | 2 _..FLVFESGI chr5@1959  | 3.57E-10 | 0.006555 |
| 13July2011 | 1011  | 616.8   | 4.063792 | 2 R.SGGGGG chr5@1954     | 1.21E-10 | 0.001661 |
| 13July2011 | 5609  | 679.84  | -28.5013 | 2 K.FEK+14.0 chr3@5399   | 3.62E-10 | 0.006555 |
| 13July2011 | 8059  | 897.42  | -27.6753 | 3 _..QVREMH Splice@chr   | 3.00E-10 | 0.005787 |
| 13July2011 | 3147  | 728.71  | 2.602274 | 3 K.TPSEQQA chr1@1348    | 4.84E-12 | 0        |
| 13July2011 | 6020  | 724.35  | 19.12636 | 3 V.CLTEEGK Splice@chr   | 1.80E-10 | 0.00287  |
| 13July2011 | 4860  | 696.83  | -11.9803 | 2 R.TDRTESV chr1@1452    | 2.58E-10 | 0.005237 |
| 13July2011 | 958   | 562.31  | -13.4391 | 2 R.FYLLYLYK Splice@chr  | 5.56E-11 | 0.001025 |
| 13July2011 | 2787  | 526.78  | -3.83085 | 2 K.KLDLNM\ chr2@7182    | 2.19E-11 | 7.90E-04 |
| 13July2011 | 379   | 531.28  | 8.35486  | 2 L.RADHTHF chr3@8398    | 4.92E-10 | 0.009313 |
| 13July2011 | 3711  | 568.3   | 16.9032  | 3 R.IACISLEKI chr1@1063  | 3.69E-10 | 0.006555 |
| 13July2011 | 4257  | 693.87  | -6.6949  | 2 V.ICVAVGD chr5@1063    | 1.55E-11 | 6.72E-04 |
| 13July2011 | 1210  | 516.57  | -12.1211 | 3 K.EQEEEEEE chr1@1070   | 2.84E-10 | 0.007613 |
| 13July2011 | 2474  | 400.72  | 7.024146 | 2 _..SDAVPG\ Splice@chr  | 1.01E-10 | 0.001868 |
| 13July2011 | 3529  | 728.71  | 2.602274 | 3 K.TPSEQQA chr1@1348    | 6.39E-13 | 0        |
| 13July2011 | 1266  | 562.31  | -13.4391 | 2 R.FYLLYLYK Splice@chr  | 6.26E-11 | 0.001255 |
| 13July2011 | 2041  | 735.33  | -27.5112 | 2 K.YGHANVI chr1@1065    | 2.72E-10 | 0.007613 |
| 13July2011 | 3259  | 527.29  | 11.90088 | 2 K.KLDLNM\ chr2@7182    | 4.45E-11 | 6.72E-04 |
| 13July2011 | 2026  | 412.23  | 25.3069  | 2 R.IASYQGG chrX@1679    | 3.37E-11 | 6.72E-04 |
| 13July2011 | 4367  | 693.87  | -6.6949  | 2 V.ICVAVGD chr5@1063    | 2.24E-10 | 0.005653 |
| 13July2011 | 3001  | 501.27  | -9.82141 | 2 K.EIFHSAA\ Splice@chr  | 2.23E-10 | 0.005653 |
| 13July2011 | 9484  | 685.88  | 4.188613 | 2 K.IVPGGGA chrX@1570    | 5.37E-16 | 0        |
| 13July2011 | 3204  | 693.87  | -6.6949  | 2 V.ICVAVGD chr5@1063    | 3.03E-10 | 0.007926 |
| 13July2011 | 3253  | 693.87  | -6.6949  | 2 V.ICVAVGD chr5@1063    | 1.34E-10 | 0.004645 |
| 13July2011 | 13345 | 795.66  | -10.8901 | 4 K.SGTIFDNI Splice@chr  | 7.44E-12 | 0.001012 |
| 13July2011 | 9806  | 664.7   | 1.197202 | 3 _..PTLNK+1. chr1@6526  | 1.11E-11 | 0.001012 |
| 13July2011 | 2139  | 403.22  | -14.6688 | 3 R.FSAIRDVI chr1@2337   | 8.80E-11 | 0.003389 |
| 13July2011 | 12712 | 589.8   | 15.96415 | 2 K.KSEIVNY\ chrX@8559   | 2.91E-10 | 0.00777  |
| 13July2011 | 9168  | 484.28  | 10.44055 | 3 K.ISSAIAMf chr4@7544   | 1.74E-10 | 0.005533 |
| 13July2011 | 1711  | 400.72  | 7.024146 | 2 _..SDAVPG\ Splice@chr  | 6.12E-11 | 0.002416 |
| 13July2011 | 9713  | 858.48  | 6.006088 | 3 _..LETGIKPi Splice@chr | 9.84E-12 | 0.001012 |
| 13July2011 | 9271  | 1134.05 | -14.1995 | 2 _..IPSAVGY\ Splice@chr | 7.25E-16 | 0        |
| 13July2011 | 13298 | 795.66  | -10.8901 | 4 K.SGTIFDNI Splice@chr  | 2.17E-10 | 0.006032 |
| 13July2011 | 12678 | 792.16  | -5.99938 | 4 K.SGTIFDNI Splice@chr  | 2.79E-11 | 0.002259 |
| 13July2011 | 767   | 562.31  | -13.4391 | 2 R.FYLLYLYK Splice@chr  | 6.39E-11 | 0.002607 |
| 13July2011 | 720   | 562.31  | -13.4391 | 2 R.FYLLYLYK Splice@chr  | 4.72E-11 | 0.002416 |
| 13July2011 | 1634  | 456.3   | 20.93878 | 2 R.RAAAPLR Splice@chr   | 1.41E-10 | 0.004645 |
| 13July2011 | 9306  | 756.37  | -13.3372 | 3 _..IPSAVGY\ Splice@chr | 1.48E-10 | 0.004645 |
| 13July2011 | 5580  | 626.68  | 23.52414 | 3 R.VVDALGI Splice@chr   | 3.92E-11 | 0.002259 |
| 13July2011 | 1358  | 412.23  | 25.3069  | 2 R.IASYQGG chrX@1679    | 2.83E-10 | 0.00777  |
| 13July2011 | 9856  | 664.7   | 1.197202 | 3 _..PTLNK+1. chr1@6526  | 2.87E-11 | 0.002259 |
| 13July2011 | 7063  | 697.34  | -19.7214 | 2 K.MDSTLNI chrX@4525    | 1.34E-11 | 5.61E-04 |
| 13July2011 | 2648  | 403.22  | -14.6688 | 3 R.FSAIRDVI chr1@2337   | 2.07E-10 | 0.007219 |
| 13July2011 | 13073 | 795.66  | -2.97654 | 4 K.SGTIFDNI Splice@chr  | 5.06E-11 | 8.20E-04 |
| 13July2011 | 3679  | 693.87  | -6.6949  | 2 V.ICVAVGD chr5@1063    | 1.72E-10 | 0.005705 |
| 13July2011 | 1884  | 584.31  | 9.626723 | 2 R.FSLKNTEI chr4@2692   | 3.23E-11 | 5.61E-04 |

|            |       |         |          |                         |          |          |
|------------|-------|---------|----------|-------------------------|----------|----------|
| 13July2011 | 2242  | 400.72  | -16.3384 | 2 K.LCVPGVR chr2@7704   | 1.99E-10 | 0.007219 |
| 13July2011 | 11953 | 849.42  | 8.560987 | 2 Q.DSSYFVE Splice@chr  | 2.17E-11 | 5.61E-04 |
| 13July2011 | 12087 | 643.37  | -18.6229 | 2 R.FSISLLFF/ chr2@1492 | 1.12E-10 | 0.003465 |
| 13July2011 | 9591  | 664.7   | 1.197202 | 3 _PTLNK+1 chr1@6526    | 1.23E-10 | 0.004154 |
| 13July2011 | 1142  | 562.31  | -13.4391 | 2 R.FYLLYLYK Splice@chr | 5.07E-11 | 8.20E-04 |
| 13July2011 | 9274  | 1134.06 | -5.36126 | 2 _IPSAVGY( Splice@chr  | 1.19E-13 | 0        |
| 13July2011 | 7245  | 897.43  | -16.505  | 3 _QVREMH Splice@chr    | 1.90E-10 | 0.006356 |
| 13July2011 | 4310  | 696.37  | -15.3603 | 2 _LPTSPIGC chr5@1204   | 1.51E-10 | 0.005281 |
| 13July2011 | 4824  | 403.46  | -23.4306 | 4 R.K+14.016 Splice@chr | 5.28E-11 | 0.00274  |
| 13July2011 | 7704  | 693.36  | -3.26231 | 3 K.KVGYDEK chr2@1201   | 2.20E-11 | 0.001933 |
| 13July2011 | 10484 | 515.29  | -6.17134 | 3 K.PNFTVILS chr4@1642  | 1.23E-10 | 0.005293 |
| 13July2011 | 9835  | 686.38  | 1.739395 | 2 K.IVPGGGA chrX@1570   | 3.42E-15 | 0        |
| 13July2011 | 10093 | 555.63  | -25.3104 | 3 R.YFK+14.0 chr1@1628  | 8.69E-11 | 0.00473  |
| 13July2011 | 3045  | 626.3   | -9.76097 | 2 R.LCESGAA Splice@chr  | 6.51E-16 | 0        |
| 13July2011 | 2988  | 626.3   | -9.76097 | 2 R.LCESGAA Splice@chr  | 2.71E-16 | 0        |
| 13July2011 | 9558  | 484.28  | 10.44055 | 3 K.ISSAIAMf chr4@7544  | 1.74E-10 | 0.006508 |
| 13July2011 | 7280  | 472.29  | -0.64754 | 2 _SPLFVPKf chrX@4402   | 1.30E-10 | 0.005668 |
| 13July2011 | 10494 | 693.43  | 22.25478 | 3 R.GFTPM+ chr4@7821    | 2.73E-10 | 0.009559 |
| 13July2011 | 4625  | 559.79  | 11.35993 | 2 R.DGWSIG( chr4@4253   | 8.36E-12 | 8.19E-04 |
| 13July2011 | 9883  | 685.88  | 4.188613 | 2 K.IVPGGGA chrX@1570   | 4.45E-17 | 0        |
| 13July2011 | 10101 | 858.48  | 6.006088 | 3 _LETGIIPf Splice@chr  | 2.55E-13 | 0        |
| 13July2011 | 7229  | 472.29  | -0.64754 | 2 _SPLFVPKf chrX@4402   | 1.30E-10 | 0.005668 |
| 13July2011 | 5354  | 509.3   | -20.473  | 2 R.SSVIMLIV chr2@5767  | 1.88E-11 | 0.00274  |
| 13July2011 | 1668  | 735.33  | -27.5112 | 2 K.YGHANVI chr1@1065   | 3.43E-11 | 0.00274  |
| 13July2011 | 7832  | 605.87  | -19.9793 | 2 V.PSILLYLLf chrX@1323 | 1.61E-10 | 0.009509 |
| 13July2011 | 5434  | 509.3   | -20.473  | 2 R.SSVIMLIV chr2@5767  | 1.88E-11 | 0.00274  |
| 13July2011 | 8558  | 685.88  | 4.188613 | 2 K.IVPGGGA chrX@1570   | 2.14E-14 | 0        |
| 13July2011 | 8981  | 894.5   | -14.1127 | 2 _VETGIIPf Splice@chr  | 4.79E-11 | 0.003523 |
| 13July2011 | 2681  | 471.79  | -5.7044  | 2 K.IKVNFPPI chr2@3034  | 1.24E-10 | 0.007855 |
| 13July2011 | 5320  | 509.8   | -23.773  | 2 R.SSVIMLIV chr2@5767  | 4.54E-11 | 0.003523 |
| 13July2011 | 2782  | 626.3   | -9.76097 | 2 R.LCESGAA Splice@chr  | 5.04E-16 | 0        |
| 13July2011 | 10425 | 733.34  | 8.667803 | 2 R.SSWWW chr4@4076     | 1.52E-10 | 0.008839 |
| 13July2011 | 2828  | 626.3   | -9.76097 | 2 R.LCESGAA Splice@chr  | 1.46E-13 | 0        |
| 13July2011 | 4638  | 560.82  | 28.56613 | 2 R.PDFSLNS chr3@3320   | 4.80E-11 | 0.003523 |
| 13July2011 | 5393  | 509.3   | -20.473  | 2 R.SSVIMLIV chr2@5767  | 7.31E-11 | 0.005541 |
| 13July2011 | 10922 | 685.88  | 4.188613 | 2 K.IVPGGGA chrX@1570   | 4.53E-19 | 0        |
| 13July2011 | 666   | 544.31  | -13.0314 | 2 K.KIDEIWRI chr5@1864  | 4.21E-10 | 0.00886  |
| 13July2011 | 8786  | 837.9   | 11.71382 | 2 V.ISTMTND chr2@4708   | 2.11E-10 | 0.005007 |
| 13July2011 | 12422 | 934.16  | 0.08721  | 3 K.LNILLDAF chr1@2327  | 1.20E-10 | 0.003683 |
| 13July2011 | 1862  | 412.23  | 25.3069  | 2 R.IASYQGG chrX@1679   | 3.03E-11 | 0.001287 |
| 13July2011 | 10616 | 484.28  | 10.44055 | 3 K.ISSAIAMf chr4@7544  | 2.47E-10 | 0.005435 |
| 13July2011 | 10347 | 660.37  | -16.199  | 2 K.TK+14.01 chr1@1424  | 2.41E-10 | 0.005297 |
| 13July2011 | 8478  | 673.32  | -23.1345 | 4 _QVREMH Splice@chr    | 8.87E-11 | 0.00358  |
| 13July2011 | 2972  | 403.22  | -14.6688 | 3 R.FSAIRDVI chr1@2337  | 9.31E-11 | 0.00358  |
| 13July2011 | 10705 | 756.37  | -13.3372 | 3 _IPSAVGY( Splice@chr  | 4.91E-11 | 0.001578 |
| 13July2011 | 11493 | 735.06  | 10.34389 | 3 R.WQHALP chr4@7817    | 1.44E-10 | 0.003793 |
| 13July2011 | 12464 | 474.28  | -15.3895 | 3 _RCTIVLFL Splice@chr  | 3.00E-11 | 0.001287 |

|            |       |         |          |                          |          |          |
|------------|-------|---------|----------|--------------------------|----------|----------|
| 13July2011 | 12378 | 740.42  | -24.9849 | 2 _._DKLK+14. chr4@7174  | 3.35E-10 | 0.007376 |
| 13July2011 | 11378 | 664.7   | 1.197202 | 3 _._PTLNK+1. chr1@6526  | 4.44E-10 | 0.009241 |
| 13July2011 | 10977 | 685.88  | 4.188613 | 2 K.IVPGGGA chrX@1570    | 1.35E-18 | 0        |
| 13July2011 | 7436  | 703.87  | 11.02855 | 2 Y.VVQVAID chr1@1045    | 3.41E-13 | 0        |
| 13July2011 | 9395  | 805.42  | -12.2158 | 2 R.QISTCKSS Splice@chr  | 2.99E-11 | 0.001287 |
| 13July2011 | 11790 | 901.51  | -11.5614 | 2 _._LETGIIKP Splice@chr | 1.15E-11 | 9.65E-04 |
| 13July2011 | 6880  | 593.84  | -9.57474 | 2 R.NEIVFQV chrX@1474    | 1.66E-10 | 0.004064 |
| 13July2011 | 6770  | 651.38  | 9.534514 | 2 K.KEAVILEL chrX@1506   | 1.85E-10 | 0.004645 |
| 13July2011 | 10668 | 484.28  | 10.44055 | 3 K.ISSAIAMF Splice@chr  | 1.70E-10 | 0.004064 |
| 13July2011 | 9576  | 664.32  | -27.1439 | 2 L.CGSGLYSI chr2@8242   | 3.76E-10 | 0.008194 |
| 13July2011 | 7484  | 703.87  | 11.02855 | 2 Y.VVQVAID chr1@1045    | 1.33E-13 | 0        |
| 13July2011 | 6798  | 733.34  | 8.667803 | 2 R.SSWWW chr4@4076      | 4.37E-11 | 0.001414 |
| 13July2011 | 11233 | 858.48  | 6.006088 | 3 _._LETGIIKP Splice@chr | 8.75E-13 | 0        |
| 13July2011 | 1754  | 543.77  | -0.44981 | 2 K.M+15.99 chrX@1550    | 9.17E-11 | 0.00358  |
| 13July2011 | 5107  | 417.21  | -4.25277 | 2 K.WAKDGE chr5@1945     | 4.40E-11 | 0.001414 |
| 13July2011 | 11427 | 894.5   | -14.1127 | 2 _._VETGIIKP Splice@chr | 3.15E-12 | 0        |
| 13July2011 | 9187  | 671.37  | -24.0361 | 2 T.FNIVHTQ Splice@chr   | 3.12E-10 | 0.006816 |
| 13July2011 | 4888  | 463.74  | -28.7537 | 2 _._FLVFESGI chr5@1955  | 2.99E-10 | 0.006696 |
| 13July2011 | 1146  | 562.31  | -13.4391 | 2 R.FYLLYLYK Splice@chr  | 5.56E-11 | 0.001908 |
| 13July2011 | 11176 | 858.48  | 6.006088 | 3 _._LETGIIKP Splice@chr | 1.54E-15 | 0        |
| 13July2011 | 11338 | 685.88  | 4.188613 | 2 K.IVPGGGA chrX@1570    | 2.70E-14 | 0        |
| 13July2011 | 8290  | 697.34  | -19.7214 | 2 K.MDSTLNI chrX@4525    | 9.47E-12 | 9.46E-04 |
| 13July2011 | 7679  | 703.87  | 11.02855 | 2 Y.VVQVAID chr1@1045    | 3.97E-15 | 0        |
| 13July2011 | 11634 | 664.7   | 1.197202 | 3 _._PTLNK+1. chr1@6526  | 7.59E-12 | 9.46E-04 |
| 13July2011 | 12555 | 763.48  | -1.96108 | 2 K.EKSLKIKIF chr1@3515  | 2.20E-10 | 0.006612 |
| 13July2011 | 9708  | 805.42  | -12.2158 | 2 R.QISTCKSS Splice@chr  | 3.79E-11 | 0.002062 |
| 13July2011 | 14896 | 1003.2  | 27.12227 | 3 R.CWNRRA Splice@chr    | 1.72E-11 | 0.001085 |
| 13July2011 | 16475 | 795.66  | -2.97654 | 4 K.SGTIFDNI Splice@chr  | 1.57E-11 | 9.46E-04 |
| 13July2011 | 11104 | 1133.56 | -3.88019 | 2 _._IPSAVGY Splice@chr  | 1.29E-13 | 0        |
| 13July2011 | 9058  | 515.95  | -27.3957 | 3 K.ILKIK+14. chr2@1445  | 1.91E-10 | 0.005822 |
| 13July2011 | 4281  | 693.87  | -6.6949  | 2 V.ICVAVGD chr5@1065    | 5.85E-11 | 0.002671 |
| 13July2011 | 1202  | 562.31  | -13.4391 | 2 R.FYLLYLYK Splice@chr  | 4.72E-11 | 0.002373 |
| 13July2011 | 6926  | 626.68  | 23.52414 | 3 R.VVDALGI Splice@chr   | 2.05E-11 | 0.001085 |
| 13July2011 | 11282 | 685.88  | 4.188613 | 2 K.IVPGGGA chrX@1570    | 4.53E-19 | 0        |
| 13July2011 | 6967  | 651.38  | 9.534514 | 2 K.KEAVILEL chrX@1506   | 2.65E-10 | 0.007548 |
| 13July2011 | 4187  | 454.75  | 8.810814 | 2 K.TDLAYLG chr4@1545    | 1.21E-10 | 0.005073 |
| 13July2011 | 12859 | 474.28  | -15.3895 | 3 _._RCTIVLFL Splice@chr | 2.45E-10 | 0.006871 |
| 13July2011 | 578   | 702.38  | 2.001521 | 1 _._DAAGLAC chr3@2528   | 8.12E-11 | 0.003716 |
| 13July2011 | 15438 | 775.98  | 11.49878 | 2 R.LLQK+14. chr1@5141   | 1.36E-10 | 0.005073 |
| 13July2011 | 3437  | 728.71  | 2.602274 | 3 K.TPSEQQA chr1@1348    | 1.97E-10 | 0.006093 |
| 13July2011 | 11568 | 858.48  | 6.006088 | 3 _._LETGIIKP Splice@chr | 4.16E-13 | 0        |
| 13July2011 | 11837 | 894     | -12.2343 | 2 _._VETGIIKP Splice@chr | 7.12E-11 | 0.002953 |
| 13July2011 | 1254  | 562.31  | -13.4391 | 2 R.FYLLYLYK Splice@chr  | 4.72E-11 | 0.002373 |
| 13July2011 | 9907  | 664.32  | -27.1439 | 2 L.CGSGLYSI chr2@8242   | 1.22E-10 | 0.005073 |
| 13July2011 | 11782 | 894     | -12.2343 | 2 _._VETGIIKP Splice@chr | 4.56E-12 | 2.13E-04 |
| 13July2011 | 15789 | 787.89  | 24.95531 | 2 K.FWREIQM chrX@1650    | 1.76E-10 | 0.005697 |
| 13July2011 | 12792 | 740.42  | -24.9849 | 2 _._DKLK+14. chr4@7174  | 8.00E-11 | 0.003716 |

|            |       |         |          |                         |          |          |
|------------|-------|---------|----------|-------------------------|----------|----------|
| 13July2011 | 6728  | 639.65  | -12.525  | 3 R.NLM+15. chr1@540    | 3.49E-10 | 0.009622 |
| 13July2011 | 1225  | 693.35  | -21.8626 | 2 P.CRAWHT chr1@478     | 5.93E-11 | 0.002671 |
| 13July2011 | 11515 | 858.48  | 6.006088 | 3 _LETGIKPI Splice@chr  | 4.54E-12 | 2.13E-04 |
| 13July2011 | 8237  | 697.34  | -19.7214 | 2 K.MDSTLNI chrX@452    | 5.46E-11 | 0.002512 |
| 13July2011 | 7627  | 703.87  | 11.02855 | 2 Y.VVQVAID chr1@104    | 1.16E-13 | 0        |
| 13July2011 | 11860 | 685.88  | 4.188613 | 2 K.IVPGGGA chrX@157    | 1.94E-16 | 0        |
| 13July2011 | 2798  | 489.3   | 10.01236 | 2 L.RTTTGISII chr5@164  | 5.69E-10 | 0.00996  |
| 13July2011 | 4894  | 417.71  | -8.28299 | 2 K.WAKDGE chr5@194     | 3.31E-10 | 0.006044 |
| 13July2011 | 3532  | 793.42  | 19.33353 | 2 R.NEKYSTV Splice@chr  | 1.52E-10 | 0.002478 |
| 13July2011 | 757   | 562.31  | -13.4391 | 2 R.FYLLYLYK Splice@chr | 5.21E-11 | 0.001117 |
| 13July2011 | 11492 | 484.28  | 10.44055 | 3 K.ISSAIAMf chr4@754   | 4.07E-10 | 0.007054 |
| 13July2011 | 11238 | 585.84  | -11.249  | 4 K.NGTLLMI chrX@131    | 3.49E-10 | 0.006146 |
| 13July2011 | 5990  | 421.25  | 28.95162 | 3 _EIVGMPA chr5@404     | 3.12E-10 | 0.005453 |
| 13July2011 | 2071  | 456.3   | 20.93878 | 2 R.RAAAPLR Splice@chr  | 1.30E-10 | 0.002355 |
| 13July2011 | 3061  | 728.71  | 2.602274 | 3 K.TPSEQQA chr1@134    | 5.16E-16 | 0        |
| 13July2011 | 3848  | 693.87  | -6.6949  | 2 V.ICVAVGD chr5@106    | 5.81E-11 | 0.001117 |
| 13July2011 | 11748 | 685.88  | 4.188613 | 2 K.IVPGGGA chrX@157    | 4.53E-19 | 0        |
| 13July2011 | 2419  | 501.27  | -9.82141 | 2 K.EIFHSAA\ Splice@chr | 1.97E-10 | 0.003077 |
| 13July2011 | 2579  | 526.79  | 15.09121 | 2 K.KLDLNM\ chr2@718    | 2.19E-11 | 7.67E-04 |
| 13July2011 | 7625  | 703.87  | 11.02855 | 2 Y.VVQVAID chr1@104    | 8.24E-15 | 0        |
| 13July2011 | 7568  | 703.87  | 11.02855 | 2 Y.VVQVAID chr1@104    | 6.33E-14 | 0        |
| 13July2011 | 11094 | 660.37  | -16.199  | 2 K.TK+14.01 chr1@142   | 3.89E-10 | 0.006722 |
| 13July2011 | 11802 | 685.88  | 4.188613 | 2 K.IVPGGGA chrX@157    | 4.53E-19 | 0        |
| 13July2011 | 11380 | 484.28  | 10.44055 | 3 K.ISSAIAMf chr4@754   | 2.10E-10 | 0.003446 |
| 13July2011 | 8037  | 590.83  | -8.07142 | 2 K.IISLPDFFI chr4@493  | 2.32E-10 | 0.004168 |
| 13July2011 | 13478 | 934.16  | 0.08721  | 3 K.LNILLDAF chr1@232   | 4.62E-10 | 0.008073 |
| 13July2011 | 4745  | 862.49  | -11.4066 | 1 _KSNLSLVS\ chr3@728   | 5.26E-10 | 0.009544 |
| 13July2011 | 17531 | 1103.59 | -25.2248 | 2 R.LFK+14.0 chr2@431   | 3.43E-11 | 0.001117 |
| 13July2011 | 9815  | 671.37  | -24.0361 | 2 T.FNIVHTQ chr4@135    | 3.83E-10 | 0.006606 |
| 13July2011 | 12741 | 762.4   | -28.9646 | 3 _AQYK+14 chr1@133     | 1.98E-10 | 0.003077 |
| 13July2011 | 1939  | 400.72  | 7.024146 | 2 _SDAVPG\ Splice@chr   | 4.05E-11 | 0.001117 |
| 13July2011 | 3622  | 440.72  | 0.555229 | 2 _QGFTNW chr4@102      | 4.00E-10 | 0.007054 |
| 13July2011 | 2203  | 412.23  | 25.3069  | 2 R.IASYQGG chrX@167    | 3.03E-11 | 0.001929 |
| 13July2011 | 1274  | 562.31  | -13.4391 | 2 R.FYLLYLYK Splice@chr | 5.42E-11 | 0.002992 |
| 13July2011 | 11829 | 664.7   | 1.197202 | 3 _PTLNK+1. chr1@652    | 2.32E-11 | 0.001787 |
| 13July2011 | 13982 | 1096.25 | 17.78349 | 3 K.VSNVLTV Splice@chr  | 2.51E-10 | 0.006804 |
| 13July2011 | 9478  | 657.04  | -26.9179 | 3 R.GNVRK+1 chrX@749    | 1.54E-10 | 0.005279 |
| 13July2011 | 11769 | 664.7   | 1.197202 | 3 _PTLNK+1. chr1@652    | 7.51E-11 | 0.003535 |
| 13July2011 | 7952  | 703.87  | 11.02855 | 2 Y.VVQVAID chr1@104    | 8.55E-11 | 0.00382  |
| 13July2011 | 8694  | 472.29  | -0.64754 | 2 _SPLFVPKf chrX@440    | 1.32E-10 | 0.005184 |
| 13July2011 | 11713 | 664.7   | 1.197202 | 3 _PTLNK+1. chr1@652    | 3.97E-11 | 0.002516 |
| 13July2011 | 11525 | 685.88  | 4.188613 | 2 K.IVPGGGA chrX@157    | 2.69E-13 | 0        |
| 13July2011 | 7298  | 557.32  | -8.88674 | 2 R.LLIEYIGH chr1@382   | 2.24E-10 | 0.005424 |
| 13July2011 | 5394  | 463.74  | -28.7537 | 2 _FLVFESG\ chr5@195    | 2.00E-10 | 0.005279 |
| 13July2011 | 11350 | 1134.06 | -5.36126 | 2 _IPSAVGY\ Splice@chr  | 1.69E-15 | 0        |
| 13July2011 | 12108 | 894     | -12.2343 | 2 _VETGIKPI Splice@chr  | 9.04E-12 | 3.90E-04 |
| 13July2011 | 5227  | 461.26  | -11.8687 | 2 _LVFCALAI chr4@147    | 3.83E-10 | 0.009781 |

|            |       |         |          |                         |          |          |
|------------|-------|---------|----------|-------------------------|----------|----------|
| 13July2011 | 11580 | 685.88  | 4.188613 | 2 K.IVPGGGA chrX@1570   | 1.00E-18 | 0        |
| 13July2011 | 11842 | 858.48  | 6.006088 | 3 _LETGIKPI Splice@chr  | 6.05E-11 | 0.003291 |
| 13July2011 | 11839 | 627.71  | -25.5807 | 3 _IFRLINLK- chrX@3686  | 2.41E-10 | 0.006259 |
| 13July2011 | 12162 | 894     | -12.2343 | 2 _VETGIKPI Splice@chr  | 2.23E-10 | 0.005279 |
| 13July2011 | 3808  | 728.71  | 2.602274 | 3 K.TPSEQQA chr1@1348   | 3.77E-12 | 1.98E-04 |
| 13July2011 | 13356 | 760.72  | 18.35362 | 3 R.RAINGTE Splice@chr  | 3.22E-10 | 0.008333 |
| 13July2011 | 11780 | 858.48  | 6.006088 | 3 _LETGIKPI Splice@chr  | 4.60E-14 | 0        |
| 13July2011 | 8004  | 703.87  | 11.02855 | 2 Y.VVQVAID chr1@1045   | 5.49E-11 | 0.003132 |
| 13July2011 | 1327  | 562.31  | -13.4391 | 2 R.FYLLYLYK Splice@chr | 4.72E-11 | 0.002516 |
| 13July2011 | 10931 | 573.83  | 11.89294 | 2 E.SPTIMTTI chrX@1024  | 3.02E-10 | 0.007824 |
| 13July2011 | 5708  | 696.83  | -11.9803 | 2 R.TDRTESV chr1@1452   | 3.76E-10 | 0.009508 |
| 13July2011 | 16665 | 1055.87 | -13.022  | 3 K.SGTIFDNI Splice@chr | 8.59E-12 | 1.98E-04 |
| 13July2011 | 16160 | 787.89  | 24.95531 | 2 K.FWREIQM chrX@1650   | 1.44E-10 | 0.005279 |
| 13July2011 | 15798 | 775.98  | 11.49878 | 2 R.LLQK+14. chr1@5141  | 1.69E-10 | 0.005279 |
| 13July2011 | 11407 | 1134.06 | -5.36126 | 2 _IPSAVGY( Splice@chr  | 1.49E-16 | 0        |
| 13July2011 | 3308  | 526.79  | 15.09121 | 2 K.KLDLNM\ chr2@7182   | 2.19E-11 | 9.25E-04 |
| 13July2011 | 3331  | 936.48  | 27.86052 | 1 K.LNGGYEC chr2@1191   | 1.77E-11 | 8.13E-04 |
| 13July2011 | 15216 | 1003.19 | 17.13413 | 3 R.CWNRRA Splice@chr   | 3.50E-12 | 1.91E-04 |
| 13July2011 | 11034 | 573.83  | 11.89294 | 2 E.SPTIMTTI chrX@1024  | 1.38E-10 | 0.002278 |
| 13July2011 | 7304  | 556.83  | 14.93446 | 2 K.VIVVYAA- chr3@8274  | 1.77E-11 | 8.13E-04 |
| 13July2011 | 7221  | 557.32  | -8.88674 | 2 R.LLIEYIGH chr1@3828  | 1.22E-10 | 0.001907 |
| 13July2011 | 16813 | 792.15  | -18.5783 | 4 K.SGTIFDNI Splice@chr | 3.03E-11 | 9.25E-04 |
| 13July2011 | 11809 | 664.7   | 1.197202 | 3 _PTLNK+1- chr1@6526   | 3.16E-11 | 0.001053 |
| 13July2011 | 16623 | 1074.07 | 18.6568  | 2 K.YFKINILEI chr2@1186 | 4.06E-11 | 0.001053 |
| 13July2011 | 3662  | 728.71  | 2.602274 | 3 K.TPSEQQA chr1@1348   | 1.41E-15 | 0        |
| 13July2011 | 11974 | 664.7   | 1.197202 | 3 _PTLNK+1- chr1@6526   | 2.75E-10 | 0.005108 |
| 13July2011 | 1929  | 412.23  | 25.3069  | 2 R.IASYQGG chrX@1679   | 3.03E-11 | 9.25E-04 |
| 13July2011 | 4337  | 693.87  | -6.6949  | 2 V.ICVAVGD chr5@1063   | 2.29E-10 | 0.00414  |
| 13July2011 | 11600 | 685.88  | 4.188613 | 2 K.IVPGGGA chrX@1570   | 1.00E-18 | 0        |
| 13July2011 | 8855  | 897.42  | -27.6753 | 3 _QVREMH Splice@chr    | 1.77E-10 | 0.003156 |
| 13July2011 | 11884 | 858.48  | 6.006088 | 3 _LETGIKPI Splice@chr  | 5.10E-13 | 0        |
| 13July2011 | 1224  | 693.35  | -21.8626 | 2 P.CRAWHT chr1@4780    | 3.48E-10 | 0.007502 |
| 13July2011 | 16723 | 792.15  | -18.5783 | 4 K.SGTIFDNI Splice@chr | 2.08E-13 | 0        |
| 13July2011 | 16088 | 634.84  | 6.410455 | 2 R.VDIGDILF Splice@chr | 7.06E-12 | 5.20E-04 |
| 13July2011 | 1970  | 587.3   | 4.892896 | 2 Q.NAVEQE Splice@chr   | 4.86E-11 | 0.001156 |
| 13July2011 | 12921 | 763.48  | -1.96108 | 2 K.EKSLKIKIF chr1@3515 | 4.31E-10 | 0.008778 |
| 13July2011 | 11255 | 484.28  | 10.44055 | 3 K.ISSAIAMF chr4@7544  | 3.34E-11 | 0.001053 |
| 13July2011 | 14909 | 849.42  | 8.560987 | 2 Q.DSSYFVE Splice@chr  | 7.68E-11 | 0.001548 |
| 13July2011 | 2547  | 400.72  | -16.3384 | 2 K.LCVPGVR chr2@7704   | 2.69E-10 | 0.004983 |
| 13July2011 | 11367 | 484.28  | 10.44055 | 3 K.ISSAIAMF Splice@chr | 3.36E-10 | 0.007048 |
| 13July2011 | 1191  | 562.31  | -13.4391 | 2 R.FYLLYLYK Splice@chr | 5.58E-11 | 0.001156 |
| 13July2011 | 11656 | 685.88  | 4.188613 | 2 K.IVPGGGA chrX@1570   | 1.45E-15 | 0        |
| 13July2011 | 11827 | 858.48  | 6.006088 | 3 _LETGIKPI Splice@chr  | 9.00E-11 | 0.001684 |
| 13July2011 | 15377 | 1003.19 | 17.13413 | 3 R.CWNRRA Splice@chr   | 1.63E-10 | 0.002915 |
| 13July2011 | 11751 | 664.7   | 1.197202 | 3 _PTLNK+1- chr1@6526   | 2.05E-10 | 0.003643 |
| 13July2011 | 714   | 531.27  | -10.5398 | 2 L.RADHTHF chr3@8398   | 4.64E-10 | 0.008356 |
| 13July2011 | 12574 | 685.88  | 4.188613 | 2 K.IVPGGGA chrX@1570   | 4.53E-19 | 0        |

|            |       |         |          |                         |          |          |
|------------|-------|---------|----------|-------------------------|----------|----------|
| 13July2011 | 12573 | 457.59  | 5.792762 | 3 K.IVPGGGA chrX@1570   | 2.85E-13 | 0        |
| 13July2011 | 4102  | 728.71  | 2.602274 | 3 K.TPSEQQA chr1@1348   | 4.60E-14 | 0        |
| 13July2011 | 1350  | 562.31  | -13.4391 | 2 R.FYLLYLYK Splice@chr | 7.09E-11 | 0.001956 |
| 13July2011 | 4744  | 454.75  | 8.810814 | 2 K.TDLAYLG chr4@1545   | 1.21E-10 | 0.003221 |
| 13July2011 | 10608 | 671.37  | -24.0361 | 2 T.FNIVHTQ Splice@chr  | 3.07E-10 | 0.00557  |
| 13July2011 | 17250 | 787.89  | 24.95531 | 2 K.FWREIQM chrX@1650   | 2.24E-10 | 0.004648 |
| 13July2011 | 13599 | 770.4   | -26.4264 | 3 R.NMTSIHS Splice@chr  | 2.44E-11 | 0.001131 |
| 13July2011 | 4911  | 693.87  | -6.6949  | 2 V.ICVAVGD chr5@1065   | 1.02E-11 | 8.80E-04 |
| 13July2011 | 2353  | 587.3   | 4.892896 | 2 Q.NAVEQE Splice@chr   | 2.53E-11 | 0.001131 |
| 13July2011 | 17277 | 634.84  | 6.410455 | 2 R.VDIGDILF Splice@chr | 8.29E-13 | 2.06E-04 |
| 13July2011 | 3744  | 936.48  | 27.86052 | 1 K.LNGGYEC chr2@1191   | 2.24E-11 | 0.001131 |
| 13July2011 | 12869 | 858.48  | 6.006088 | 3 _LETGIKPI Splice@chr  | 7.44E-13 | 2.06E-04 |
| 13July2011 | 7879  | 557.32  | -8.88674 | 2 R.LLIEYIGH chr1@3828  | 1.20E-10 | 0.003221 |
| 13July2011 | 2943  | 400.73  | 8.70363  | 2 K.LCVPGVR chr2@7704   | 3.71E-10 | 0.006541 |
| 13July2011 | 18423 | 795.66  | -10.8901 | 4 K.SGTIFDNI Splice@chr | 1.06E-11 | 8.80E-04 |
| 13July2011 | 1404  | 562.31  | -13.4391 | 2 R.FYLLYLYK Splice@chr | 4.72E-11 | 0.001487 |
| 13July2011 | 315   | 511.24  | 12.68013 | 3 R.GGDGGA chr3@2778    | 2.72E-12 | 6.71E-04 |
| 13July2011 | 11622 | 1128.05 | 6.854678 | 2 _IPSAVGYI Splice@chr  | 1.24E-11 | 8.80E-04 |
| 13July2011 | 14966 | 969.02  | -0.91362 | 2 Y.QRHVFNI Splice@chr  | 3.87E-10 | 0.006755 |
| 13July2011 | 7287  | 724.35  | 19.12636 | 3 V.CLTEEGK Splice@chr  | 4.86E-10 | 0.00888  |
| 13July2011 | 12524 | 685.88  | 4.188613 | 2 K.IVPGGGA chrX@1570   | 1.16E-15 | 0        |
| 13July2011 | 4042  | 728.71  | 2.602274 | 3 K.TPSEQQA chr1@1348   | 2.41E-13 | 0        |
| 13July2011 | 9452  | 673.32  | -23.1345 | 4 _QVREMH Splice@chr    | 2.61E-11 | 0.001131 |
| 13July2011 | 18384 | 795.66  | -2.97654 | 4 K.SGTIFDNI Splice@chr | 2.22E-10 | 0.004648 |
| 13July2011 | 9256  | 574.8   | 1.730232 | 4 K.TK+14.01 chr5@4987  | 4.07E-10 | 0.007073 |
| 13July2011 | 10499 | 671.37  | -24.0361 | 2 T.FNIVHTQ Splice@chr  | 1.71E-10 | 0.00388  |
| 13July2011 | 9505  | 673.32  | -23.1345 | 4 _QVREMH Splice@chr    | 3.69E-10 | 0.006541 |
| 13July2011 | 7239  | 480.27  | -18.5931 | 2 K.IMVVGVI chr4@8732   | 3.54E-11 | 0.001375 |
| 13July2011 | 11573 | 1128.05 | 6.854678 | 2 _IPSAVGYI Splice@chr  | 2.22E-13 | 0        |
| 13July2011 | 12631 | 685.88  | 4.188613 | 2 K.IVPGGGA chrX@1570   | 4.53E-19 | 0        |
| 13July2011 | 12814 | 858.48  | 6.006088 | 3 _LETGIKPI Splice@chr  | 3.91E-11 | 0.001375 |
| 13July2011 | 18114 | 792.16  | -5.99938 | 4 K.SGTIFDNI Splice@chr | 5.51E-11 | 0.001607 |
| 13July2011 | 3977  | 509.8   | -23.773  | 2 R.SSVIMLIV chr2@5767  | 9.61E-11 | 0.004712 |
| 13July2011 | 3937  | 509.3   | -20.473  | 2 R.SSVIMLIV chr2@5767  | 1.09E-10 | 0.004712 |
| 13July2011 | 4852  | 697.34  | -19.7214 | 2 K.MDSTLNI chrX@4525   | 1.25E-10 | 0.006208 |
| 13July2011 | 4817  | 697.34  | -19.7214 | 2 K.MDSTLNI chrX@4525   | 1.94E-11 | 0.001164 |
| 13July2011 | 4784  | 697.34  | -19.7214 | 2 K.MDSTLNI chrX@4525   | 6.04E-11 | 0.003275 |
| 13July2011 | 4749  | 472.29  | -0.64754 | 2 _SPLFVPKI chrX@4402   | 1.34E-10 | 0.007637 |
| 13July2011 | 1191  | 400.72  | 7.024146 | 2 _SDAVPGV Splice@chr   | 1.39E-10 | 0.007637 |
| 13July2011 | 9418  | 792.15  | -18.5783 | 4 K.SGTIFDNI Splice@chr | 1.16E-10 | 0.005195 |
| 13July2011 | 393   | 452.23  | -1.48793 | 2 R.SGEPLSA Splice@chr  | 2.04E-10 | 0.009723 |
| 13July2011 | 1247  | 626.82  | -18.5922 | 2 W.QFDLGK Splice@chr   | 1.87E-10 | 0.009364 |
| 13July2011 | 4032  | 509.3   | -20.473  | 2 R.SSVIMLIV chr2@5767  | 6.33E-11 | 0.003275 |
| 13July2011 | 4059  | 509.3   | -20.473  | 2 R.SSVIMLIV chr2@5767  | 2.94E-11 | 0.001164 |
| 13July2011 | 2653  | 558.3   | -2.40945 | 2 R.LEIDSSNI Splice@chr | 1.96E-11 | 0.001164 |
| 13July2011 | 4005  | 509.8   | -23.773  | 2 R.SSVIMLIV chr2@5767  | 5.21E-11 | 0.001679 |
| 13July2011 | 11448 | 664.7   | 1.197202 | 3 _PTLNK+1 chr1@6526    | 4.35E-12 | 2.35E-04 |

|            |       |         |          |                         |          |          |
|------------|-------|---------|----------|-------------------------|----------|----------|
| 13July2011 | 11339 | 664.7   | 1.197202 | 3 _PTLNK+1 chr1@6526    | 1.45E-10 | 0.004963 |
| 13July2011 | 10978 | 1133.56 | -3.88019 | 2 _IPSAVGY Splice@chr   | 1.03E-15 | 0        |
| 13July2011 | 2572  | 400.72  | 7.024146 | 2 _SDAVPG Splice@chr    | 1.35E-11 | 8.69E-04 |
| 13July2011 | 3239  | 525.77  | -15.469  | 2 R.YPATWR chr3@4627    | 2.83E-11 | 0.001787 |
| 13July2011 | 11283 | 664.7   | 1.197202 | 3 _PTLNK+1 chr1@6526    | 1.06E-12 | 0        |
| 13July2011 | 2673  | 400.73  | 8.70363  | 2 K.LCVPGVR chr2@7704   | 2.17E-10 | 0.007448 |
| 13July2011 | 1361  | 562.31  | -13.4391 | 2 R.FYLLYLYK Splice@chr | 1.07E-10 | 0.003874 |
| 13July2011 | 11744 | 735.06  | 10.34389 | 3 R.WQHALP chr4@7817    | 8.24E-11 | 0.003613 |
| 13July2011 | 4331  | 693.87  | -6.6949  | 2 V.ICVAVGD chr5@1065   | 1.55E-10 | 0.005129 |
| 13July2011 | 3348  | 525.77  | -15.469  | 2 R.YPATWR chr3@4627    | 2.35E-10 | 0.008088 |
| 13July2011 | 11160 | 685.88  | 4.188613 | 2 K.IVPGGGA chrX@1570   | 1.24E-17 | 0        |
| 13July2011 | 11107 | 686.38  | 1.739395 | 2 K.IVPGGGA chrX@1570   | 1.69E-13 | 0        |
| 13July2011 | 3087  | 403.22  | -14.6688 | 3 R.FSAIRDVI chr1@2337  | 3.22E-11 | 0.001787 |
| 13July2011 | 8803  | 693.36  | -3.26231 | 3 K.KVGYDEK chr2@1201   | 1.97E-11 | 0.001253 |
| 13July2011 | 8490  | 550.82  | 20.90876 | 4 R.HSSGLKN chr5@1455   | 2.74E-11 | 0.001787 |
| 13July2011 | 5032  | 558.3   | -2.40945 | 2 R.LEIDSSNI Splice@chr | 9.11E-12 | 6.75E-04 |
| 13July2011 | 15328 | 634.84  | 6.410455 | 2 R.VDIGDILF Splice@chr | 6.46E-11 | 0.003123 |
| 13July2011 | 8249  | 697.34  | -19.7214 | 2 K.MDSTLNI chrX@4525   | 6.52E-12 | 2.35E-04 |
| 13July2011 | 8494  | 897.42  | -27.6753 | 3 _QVREMH Splice@chr    | 1.39E-10 | 0.004963 |
| 13July2011 | 5474  | 559.79  | 11.35993 | 2 R.DGWSIG chr4@4255    | 1.64E-10 | 0.005788 |
| 13July2011 | 11323 | 858.48  | 6.006088 | 3 _LETGIKPI Splice@chr  | 4.52E-11 | 0.002496 |
| 13July2011 | 12034 | 770.4   | -26.4264 | 3 R.NMTSIHS Splice@chr  | 2.71E-10 | 0.009448 |
| 13July2011 | 9651  | 805.42  | -12.2158 | 2 R.QISTCKSS Splice@chr | 7.50E-11 | 0.00347  |
| 13July2011 | 5110  | 463.74  | -28.7537 | 2 _FLVFESGI chr5@1959   | 1.84E-10 | 0.006731 |
| 13July2011 | 11380 | 858.48  | 6.006088 | 3 _LETGIKPI Splice@chr  | 4.41E-13 | 0        |
| 13July2011 | 9389  | 1134.06 | -5.36126 | 2 _IPSAVGY Splice@chr   | 6.29E-15 | 0        |
| 13July2011 | 1497  | 735.33  | -27.5112 | 2 K.YGHANVI chr1@1065   | 3.61E-10 | 0.009463 |
| 13July2011 | 9597  | 685.88  | 4.188613 | 2 K.IVPGGGA chrX@1570   | 2.90E-15 | 0        |
| 13July2011 | 9871  | 664.7   | 1.197202 | 3 _PTLNK+1 chr1@6526    | 1.26E-10 | 0.003178 |
| 13July2011 | 12494 | 792.16  | -5.99938 | 4 K.SGTIFDNI Splice@chr | 3.83E-10 | 0.009802 |
| 13July2011 | 12356 | 643.37  | -18.6229 | 2 R.FSISLLFF chr2@1492  | 2.21E-10 | 0.00524  |
| 13July2011 | 9796  | 858.48  | 6.006088 | 3 _LETGIKPI Splice@chr  | 9.42E-13 | 0        |
| 13July2011 | 4045  | 463.74  | -28.7537 | 2 _FLVFESGI chr5@1959   | 2.06E-10 | 0.00524  |
| 13July2011 | 9326  | 484.28  | 10.44055 | 3 K.ISSAIAMF chr4@7544  | 9.11E-11 | 0.002159 |
| 13July2011 | 8929  | 660.87  | -18.7429 | 2 K.TK+14.01 chr1@1424  | 1.25E-10 | 0.003178 |
| 13July2011 | 9415  | 756.37  | -13.3372 | 3 _IPSAVGY Splice@chr   | 6.19E-12 | 0        |
| 13July2011 | 780   | 562.31  | -13.4391 | 2 R.FYLLYLYK Splice@chr | 6.90E-11 | 0.001351 |
| 13July2011 | 8998  | 573.83  | 11.89294 | 2 E.SPTIMTTI chrX@1024  | 8.01E-11 | 0.001977 |
| 13July2011 | 7723  | 596.84  | 23.63394 | 2 G.M+15.99 chr3@1272   | 2.97E-10 | 0.006672 |
| 13July2011 | 2310  | 403.22  | -14.6688 | 3 R.FSAIRDVI chr1@2337  | 1.13E-10 | 0.002352 |
| 13July2011 | 5808  | 556.83  | 14.93446 | 2 K.VIVVYAA chr3@8274   | 1.70E-10 | 0.004338 |
| 13July2011 | 1229  | 562.31  | -13.4391 | 2 R.FYLLYLYK Splice@chr | 5.91E-11 | 0.002815 |
| 13July2011 | 643   | 495.26  | -0.67919 | 2 _RDEAQS Splice@chr    | 1.02E-10 | 0.0034   |
| 13July2011 | 8148  | 837.9   | 11.71382 | 2 V.ISTMTND chr2@4708   | 1.52E-10 | 0.004325 |
| 13July2011 | 8106  | 693.36  | -3.26231 | 3 K.KVGYDEK chr2@1201   | 1.12E-10 | 0.003794 |
| 13July2011 | 10708 | 735.06  | 10.34389 | 3 R.WQHALP chr4@7817    | 7.10E-11 | 0.002815 |
| 13July2011 | 4941  | 559.79  | 11.35993 | 2 R.DGWSIG chr4@4255    | 2.98E-10 | 0.008659 |

|            |       |         |          |                          |          |          |
|------------|-------|---------|----------|--------------------------|----------|----------|
| 13July2011 | 9674  | 581.8   | -16.0784 | 2 K.SWVDSS( chr2@1165    | 3.26E-10 | 0.009162 |
| 13July2011 | 13549 | 792.16  | -5.99938 | 4 K.SGTIFDNI Splice@chr  | 2.11E-11 | 0.001071 |
| 13July2011 | 2399  | 400.72  | 7.024146 | 2 _SDAVPG\ Splice@chr    | 5.91E-11 | 0.002815 |
| 13July2011 | 4677  | 672.83  | 14.26368 | 2 R.QEM+15. chr3@1026    | 1.17E-10 | 0.003794 |
| 13July2011 | 13018 | 643.37  | -18.6229 | 2 R.FSISLLFF\ chr2@1492  | 1.47E-10 | 0.004325 |
| 13July2011 | 10614 | 735.06  | 10.34389 | 3 R.WQHALP chr4@7817     | 2.95E-10 | 0.008469 |
| 13July2011 | 8576  | 671.37  | -24.0361 | 2 T.FNIVHTQ Splice@chr   | 2.05E-10 | 0.006496 |
| 13July2011 | 11790 | 576.38  | 9.122915 | 2 K.KLILPHFR chr2@4900   | 3.11E-10 | 0.009005 |
| 13July2011 | 1894  | 412.23  | 25.3069  | 2 R.IASYQGG chrX@1679    | 1.66E-10 | 0.005378 |
| 13July2011 | 3010  | 525.77  | -15.469  | 2 R.YPATWR\ chr3@4627    | 4.31E-11 | 0.002487 |
| 13July2011 | 5882  | 599.62  | 1.63138  | 3 R.NAEAA\ Splice@chr    | 1.81E-10 | 0.004402 |
| 13July2011 | 9310  | 805.43  | 0.227624 | 2 R.QISTCKSS\ Splice@chr | 1.64E-11 | 6.00E-04 |
| 13July2011 | 2457  | 526.79  | 15.09121 | 2 K.KLDLNM\ chr2@7182    | 2.19E-11 | 6.00E-04 |
| 13July2011 | 9723  | 1127.05 | -7.23835 | 2 _IPSAVGY( Splice@chr   | 9.13E-13 | 0        |
| 13July2011 | 423   | 486.8   | -3.32946 | 2 R.KNREKA\ chr3@9236    | 3.38E-10 | 0.008232 |
| 13July2011 | 1614  | 735.34  | -13.8803 | 2 K.YGHANVI chr1@1065    | 2.74E-10 | 0.006227 |
| 13July2011 | 11419 | 737.36  | 7.484025 | 4 R.NAEAA\ Splice@chr    | 1.09E-13 | 0        |
| 13July2011 | 3234  | 468.78  | 18.7467  | 2 K.ISGKFDIR chrX@1561   | 2.86E-10 | 0.006382 |
| 13July2011 | 4651  | 696.83  | -11.9803 | 2 R.TDRTESV chr1@1452    | 1.13E-10 | 0.00315  |
| 13July2011 | 10635 | 664.7   | 1.197202 | 3 _PTLNK+1. chr1@6526    | 2.98E-10 | 0.006693 |
| 13July2011 | 10324 | 664.37  | 7.851479 | 3 _PTLNK+1. chr1@6526    | 3.74E-10 | 0.008669 |
| 13July2011 | 11466 | 737.36  | 7.484025 | 4 R.NAEAA\ Splice@chr    | 3.25E-17 | 0        |
| 13July2011 | 9140  | 805.42  | -12.2158 | 2 R.QISTCKSS\ Splice@chr | 4.13E-11 | 0.001524 |
| 13July2011 | 6210  | 651.38  | 9.534514 | 2 K.KEAVILEL chrX@1506   | 2.65E-10 | 0.005926 |
| 13July2011 | 10497 | 685.88  | 4.188613 | 2 K.IVPGGGA chrX@1570    | 1.53E-14 | 0        |
| 13July2011 | 3508  | 693.87  | -6.6949  | 2 V.ICVAVGD chr5@1063    | 9.91E-11 | 0.00301  |
| 13July2011 | 11978 | 474.28  | -15.3895 | 3 _RCTIVLFL Splice@chr   | 3.22E-10 | 0.008106 |
| 13July2011 | 4608  | 559.79  | 11.35993 | 2 R.DGWSIG( chr4@4253    | 1.03E-10 | 0.00301  |
| 13July2011 | 9920  | 660.37  | -16.199  | 2 K.TK+14.01 chr1@1424   | 3.94E-10 | 0.009276 |
| 13July2011 | 1885  | 400.72  | 7.024146 | 2 _SDAVPG\ Splice@chr    | 2.34E-10 | 0.005476 |
| 13July2011 | 279   | 522.8   | -6.43343 | 2 K.M+15.99 chr4@1097    | 2.52E-10 | 0.005789 |
| 13July2011 | 14726 | 792.15  | -18.5783 | 4 K.SGTIFDNI Splice@chr  | 4.60E-12 | 4.40E-04 |
| 13July2011 | 10740 | 664.7   | 1.197202 | 3 _PTLNK+1. chr1@6526    | 3.03E-10 | 0.00684  |
| 13July2011 | 10687 | 664.7   | 1.197202 | 3 _PTLNK+1. chr1@6526    | 2.98E-10 | 0.006693 |
| 13July2011 | 5770  | 599.62  | 1.63138  | 3 R.NAEAA\ Splice@chr    | 1.89E-12 | 0        |
| 13July2011 | 2507  | 526.78  | -3.83085 | 2 K.KLDLNM\ chr2@7182    | 2.19E-11 | 6.00E-04 |
| 13July2011 | 8931  | 851.49  | -3.4814  | 2 K.RGVRLSH chr2@2785    | 2.38E-10 | 0.005633 |
| 13July2011 | 2565  | 526.78  | -3.83085 | 2 K.KLDLNM\ chr2@7182    | 2.19E-11 | 6.00E-04 |
| 13July2011 | 10554 | 685.88  | 4.188613 | 2 K.IVPGGGA chrX@1570    | 9.54E-19 | 0        |
| 13July2011 | 10751 | 858.48  | 6.006088 | 3 _LETGIKPI Splice@chr   | 7.95E-12 | 4.40E-04 |
| 13July2011 | 11514 | 737.36  | 7.484025 | 4 R.NAEAA\ Splice@chr    | 3.64E-16 | 0        |
| 13July2011 | 3747  | 604.83  | -0.40433 | 2 K.SISFSSPD Splice@chr  | 6.27E-11 | 0.002214 |
| 13July2011 | 9679  | 605.87  | -19.9793 | 2 V.PSILLYLL\ chrX@1323  | 4.13E-10 | 0.009566 |
| 13July2011 | 5825  | 599.62  | 1.63138  | 3 R.NAEAA\ Splice@chr    | 1.45E-14 | 0        |
| 13July2011 | 10726 | 685.88  | 4.188613 | 2 K.IVPGGGA chrX@1570    | 4.53E-19 | 0        |
| 13July2011 | 10551 | 1134.06 | -5.36126 | 2 _IPSAVGY( Splice@chr   | 3.22E-16 | 0        |
| 13July2011 | 10948 | 858.48  | 6.006088 | 3 _LETGIKPI Splice@chr   | 2.87E-11 | 0.001432 |

|            |       |         |          |                         |          |          |
|------------|-------|---------|----------|-------------------------|----------|----------|
| 13July2011 | 3262  | 527.29  | 11.90088 | 2 K.KLDLNM\ chr2@7182   | 2.19E-11 | 9.94E-04 |
| 13July2011 | 8016  | 697.34  | -19.7214 | 2 K.MDSTLNI chrX@4525   | 1.29E-10 | 0.004734 |
| 13July2011 | 10093 | 660.87  | -18.7429 | 2 K.TK+14.01 chr1@1424  | 1.30E-10 | 0.004734 |
| 13July2011 | 11190 | 668.88  | -18.9169 | 2 D.KDVQHM Splice@chr   | 5.51E-11 | 0.003333 |
| 13July2011 | 6667  | 733.84  | 6.377301 | 2 R.SSWWW chr4@4076     | 1.59E-10 | 0.006659 |
| 13July2011 | 10855 | 664.7   | 1.197202 | 3 _PTLNK+1 chr1@6526    | 2.66E-11 | 0.001211 |
| 13July2011 | 1196  | 562.31  | -13.4391 | 2 R.FYLLLYK Splice@chr  | 1.29E-10 | 0.004734 |
| 13July2011 | 10587 | 756.37  | -13.3372 | 3 _IPSAVGY Splice@chr   | 2.38E-10 | 0.009559 |
| 13July2011 | 6282  | 599.96  | 10.97902 | 3 R.NAEAA Splice@chr    | 3.61E-11 | 0.001874 |
| 13July2011 | 5168  | 559.79  | 11.35993 | 2 R.DGWSIG chr4@4255    | 1.93E-10 | 0.007905 |
| 13July2011 | 3314  | 527.29  | 11.90088 | 2 K.KLDLNM\ chr2@7182   | 2.19E-11 | 9.94E-04 |
| 13July2011 | 6335  | 599.62  | 1.63138  | 3 R.NAEAA Splice@chr    | 5.36E-13 | 0        |
| 13July2011 | 13654 | 787.89  | 24.95531 | 2 K.FWREIQM chrX@1650   | 1.59E-10 | 0.004761 |
| 13July2011 | 6628  | 704.37  | 8.642004 | 2 Y.VVQVAID chr1@1045   | 8.40E-13 | 0        |
| 13July2011 | 9712  | 756.37  | -13.3372 | 3 _IPSAVGY Splice@chr   | 1.03E-10 | 0.003622 |
| 13July2011 | 10654 | 901.51  | -11.5614 | 2 _LETGIKPI Splice@chr  | 8.39E-13 | 0        |
| 13July2011 | 6044  | 733.34  | 8.667803 | 2 R.SSWWW chr4@4076     | 2.04E-11 | 5.13E-04 |
| 13July2011 | 9306  | 660.37  | -16.199  | 2 K.TK+14.01 chr1@1424  | 3.16E-10 | 0.008738 |
| 13July2011 | 11387 | 934.16  | 0.08721  | 3 K.LNILLDAF chr1@2327  | 2.91E-10 | 0.008197 |
| 13July2011 | 6674  | 703.87  | 11.02855 | 2 Y.VVQVAID chr1@1045   | 7.53E-13 | 0        |
| 13July2011 | 2986  | 728.71  | 2.602274 | 3 K.TPSEQQA chr1@1348   | 1.62E-10 | 0.004946 |
| 13July2011 | 10068 | 858.48  | 6.006088 | 3 _LETGIKPI Splice@chr  | 1.15E-10 | 0.003622 |
| 13July2011 | 10202 | 664.7   | 1.197202 | 3 _PTLNK+1 chr1@6526    | 1.84E-12 | 0        |
| 13July2011 | 9676  | 1134.06 | -5.36126 | 2 _IPSAVGY Splice@chr   | 3.28E-17 | 0        |
| 13July2011 | 8496  | 805.42  | -12.2158 | 2 R.QISTCKSS Splice@chr | 3.87E-11 | 0.001679 |
| 13July2011 | 2681  | 527.29  | 11.90088 | 2 K.KLDLNM\ chr2@7182   | 2.26E-11 | 0.001    |
| 13July2011 | 10330 | 894.5   | -14.1127 | 2 _VETGIKP Splice@chr   | 1.57E-11 | 0        |
| 13July2011 | 10377 | 894     | -12.2343 | 2 _VETGIKP Splice@chr   | 3.49E-10 | 0.009781 |
| 13July2011 | 2149  | 400.72  | 7.024146 | 2 _SDAVPGV Splice@chr   | 1.48E-10 | 0.004761 |
| 13July2011 | 1679  | 418.22  | 1.024051 | 2 _YEPGKNK chr1@1810    | 1.39E-10 | 0.004594 |
| 13July2011 | 10113 | 858.48  | 6.006088 | 3 _LETGIKPI Splice@chr  | 1.75E-10 | 0.005296 |
| 13July2011 | 6120  | 509.3   | -20.473  | 2 R.SSVIMLIV chr2@5767  | 5.59E-11 | 0.002049 |
| 13July2011 | 2000  | 400.72  | -16.3384 | 2 K.LCVPGVR chr2@7704   | 1.97E-10 | 0.00567  |
| 13July2011 | 6724  | 997.55  | -25.6006 | 1 _KLTIMTYI chr2@2205   | 3.08E-10 | 0.005787 |
| 13July2011 | 7286  | 997.55  | -25.6006 | 1 _KLTIMTYI chr2@2205   | 1.24E-10 | 0.004693 |
| 13July2011 | 10915 | 780.1   | -27.2467 | 3 K.LVPHQNF Splice@chr  | 2.18E-11 | 5.61E-04 |
| 13July2011 | 3129  | 504.28  | 1.458908 | 2 R.KNAVFW chr1@1108    | 1.78E-10 | 0.004192 |
| 13July2011 | 8677  | 627.33  | -8.09147 | 3 K.QSMK+1 chrX@1419    | 4.11E-10 | 0.008581 |
| 13July2011 | 1879  | 563.33  | 10.02931 | 3 K.QHILIDSII chr1@1236 | 3.02E-10 | 0.008138 |
| 13July2011 | 3062  | 419.22  | -1.9459  | 3 K.KSKQFAS Splice@chr  | 5.85E-10 | 0.009505 |
| 13July2011 | 2347  | 460.73  | -18.1885 | 2 R.TSISPNSS Splice@chr | 5.20E-10 | 0.009153 |
| 13July2011 | 8788  | 748.4   | -15.2389 | 2 R.RMFPTDI Splice@chr  | 1.15E-10 | 0.003465 |
| 13July2011 | 12913 | 854.39  | -26.3192 | 2 K.WRK MSE chr4@2572   | 3.33E-10 | 0.008674 |
| 13July2011 | 2280  | 561.28  | -21.1086 | 3 R.WK+14.0 chrX@1165   | 1.30E-10 | 0.002767 |
| 13July2011 | 12353 | 692.89  | 6.792687 | 2 R.SPLFLNLT chr3@1037  | 4.17E-10 | 0.008664 |
| 13July2011 | 9784  | 711.92  | -18.6847 | 2 R.KK+14.01 Splice@chr | 1.65E-10 | 0.009509 |
| 13July2011 | 12591 | 711.92  | -18.6847 | 2 R.KK+14.01 Splice@chr | 1.39E-10 | 0.004963 |

|            |       |        |          |                         |          |          |
|------------|-------|--------|----------|-------------------------|----------|----------|
| 13July2011 | 5364  | 701.32 | 9.848522 | 2 K.NM+15.9 chrX@156    | 2.38E-10 | 0.006382 |
| 13July2011 | 18284 | 980.48 | 14.37405 | 3 R.K+14.016 chr5@136   | 6.09E-11 | 0.001226 |
| 13July2011 | 16532 | 980.47 | 4.154348 | 3 R.K+14.016 chr5@136   | 8.48E-11 | 0.001548 |
| 13July2011 | 3488  | 405.88 | -9.2016  | 3 R.FHRSYTIY Splice@chr | 2.53E-10 | 0.006639 |
| 13July2011 | 2902  | 405.88 | -9.2016  | 3 R.FHRSYTIY Splice@chr | 1.44E-10 | 0.0055   |
| 13July2011 | 13542 | 807.65 | -23.822  | 4 K.SCKNNEK chr2@139    | 3.90E-11 | 0.002365 |
| 13July2011 | 9436  | 631.33 | -21.7867 | 4 R.MTSGK+ Splice@chr   | 4.96E-12 | 0        |
| 13July2011 | 4168  | 609.31 | -12.542  | 2 A.IEQMM+ Splice@chr   | 2.83E-10 | 0.006515 |
| 13July2011 | 4189  | 498.27 | 4.90972  | 2 R.RSAGGEF chr5@288    | 4.60E-11 | 0.001246 |
| 13July2011 | 15978 | 786.4  | -14.6929 | 3 K.K+14.016 Splice@chr | 1.42E-10 | 0.002635 |
| 13July2011 | 6737  | 649.66 | 6.246021 | 3 _NMNYRF Splice@chr    | 1.47E-10 | 0.001679 |
| 13July2011 | 14272 | 706.71 | -17.1604 | 3 K.M+15.99 chr2@884    | 2.97E-10 | 0.006784 |
| 13July2011 | 3987  | 439.79 | 16.69243 | 2 R.VALHVAL chr4@416    | 5.85E-11 | 7.73E-04 |
| 13July2011 | 3232  | 439.78 | -6.12056 | 2 R.VALHVAL chr4@416    | 1.26E-10 | 0.002586 |
| 13July2011 | 3293  | 439.78 | -6.12056 | 2 R.VALHVAL chr4@416    | 1.26E-10 | 0.002586 |
| 13July2011 | 3677  | 439.78 | -6.12056 | 2 R.VALHVAL chr4@416    | 2.52E-10 | 0.005936 |
| 13July2011 | 3079  | 439.78 | -6.12056 | 2 R.VALHVAL chr4@416    | 9.14E-11 | 0.001227 |
| 13July2011 | 3635  | 439.78 | -6.12056 | 2 R.VALHVAL chr4@416    | 1.17E-10 | 0.001757 |
| 13July2011 | 3620  | 439.79 | 16.69243 | 2 R.VALHVAL chr4@416    | 2.97E-10 | 0.007152 |
| 13July2011 | 2789  | 439.78 | -6.12056 | 2 R.VALHVAL chr4@416    | 1.46E-10 | 0.002355 |
| 13July2011 | 2727  | 439.79 | 16.69243 | 2 R.VALHVAL chr4@416    | 1.26E-10 | 0.00331  |
| 13July2011 | 2892  | 439.78 | -6.12056 | 2 R.VALHVAL chr4@416    | 1.26E-10 | 0.004203 |
| 13July2011 | 329   | 441.89 | 21.87379 | 3 K.STVPGLD chr3@722    | 3.65E-11 | 4.03E-04 |
| 13July2011 | 7442  | 704.9  | -11.0619 | 2 K.NERERIH chr2@786    | 4.25E-10 | 0.008188 |
| 13July2011 | 8418  | 763.38 | -28.1573 | 2 K.EFVICLNL chr1@120   | 2.74E-10 | 0.006529 |
| 13July2011 | 6358  | 520.8  | -28.4154 | 2 R.VLGSNPV chr2@229    | 2.66E-10 | 0.005951 |
| 13July2011 | 17099 | 715.4  | -27.9123 | 2 R.K+14.016 chr1@104   | 3.42E-10 | 0.005178 |
| 13July2011 | 3381  | 594.81 | -21.482  | 2 K.INGTEKN chrX@695    | 6.02E-11 | 0.001597 |
| 13July2011 | 3979  | 594.81 | -21.482  | 2 K.INGTEKN chrX@695    | 3.31E-11 | 6.22E-04 |
| 13July2011 | 3095  | 594.81 | -21.482  | 2 K.INGTEKN chrX@695    | 5.49E-11 | 0.001098 |
| 13July2011 | 3037  | 594.81 | -21.482  | 2 K.INGTEKN chrX@695    | 1.96E-11 | 2.94E-04 |
| 13July2011 | 4303  | 595.32 | -7.45009 | 2 K.INGTEKN chrX@695    | 1.90E-11 | 4.19E-04 |
| 13July2011 | 4359  | 594.81 | -21.482  | 2 K.INGTEKN chrX@695    | 1.82E-10 | 0.003056 |
| 13July2011 | 3644  | 594.81 | -21.482  | 2 K.INGTEKN chrX@695    | 1.05E-11 | 1.43E-04 |
| 13July2011 | 4014  | 594.81 | -21.482  | 2 K.INGTEKN chrX@695    | 1.85E-10 | 0.005012 |
| 13July2011 | 4205  | 594.81 | -21.482  | 2 K.INGTEKN chrX@695    | 5.37E-11 | 0.001868 |
| 13July2011 | 3492  | 594.81 | -21.482  | 2 K.INGTEKN chrX@695    | 7.72E-12 | 2.97E-04 |
| 13July2011 | 3067  | 594.81 | -21.482  | 2 K.INGTEKN chrX@695    | 2.63E-10 | 0.009371 |
| 13July2011 | 3581  | 594.81 | -21.482  | 2 K.INGTEKN chrX@695    | 1.42E-11 | 9.65E-04 |
| 13July2011 | 3182  | 595.31 | -24.3068 | 2 K.INGTEKN chrX@695    | 9.88E-11 | 0.001898 |
| 13July2011 | 3241  | 594.81 | -21.482  | 2 K.INGTEKN chrX@695    | 2.26E-11 | 9.19E-04 |
| 13July2011 | 4012  | 594.81 | -21.482  | 2 K.INGTEKN chrX@695    | 8.66E-11 | 0.003961 |
| 13July2011 | 3004  | 594.81 | -21.482  | 2 K.INGTEKN chrX@695    | 7.72E-11 | 0.002696 |
| 13July2011 | 2951  | 595.31 | -24.3068 | 2 K.INGTEKN chrX@695    | 4.21E-10 | 0.009706 |
| 13July2011 | 3638  | 594.81 | -21.482  | 2 K.INGTEKN chrX@695    | 9.40E-11 | 0.004029 |
| 13July2011 | 3082  | 594.81 | -21.482  | 2 K.INGTEKN chrX@695    | 6.11E-12 | 0        |
| 13July2011 | 1966  | 481.76 | -16.8216 | 2 K.NNGFKR/ Splice@chr  | 6.22E-11 | 0.002241 |

|            |       |        |          |                          |          |          |
|------------|-------|--------|----------|--------------------------|----------|----------|
| 13July2011 | 15901 | 749.43 | -25.8618 | 3 R.IMGLLIM chr5@5135    | 3.01E-10 | 0.004912 |
| 13July2011 | 1332  | 408.55 | -24.0615 | 3 _..KLFSASEK chr5@1509  | 1.19E-10 | 0.007534 |
| 13July2011 | 15724 | 899.48 | 14.89911 | 4 K.FPANRQ1 chr2@1240    | 5.37E-11 | 5.59E-04 |
| 13July2011 | 13576 | 754.73 | -8.42168 | 3 K.FPK+14.0 chr1@3091   | 4.40E-10 | 0.009241 |
| 13July2011 | 14035 | 755.07 | -1.05176 | 3 K.FPK+14.0 chr1@3091   | 2.53E-10 | 0.007425 |
| 13July2011 | 9448  | 704.86 | 0.607012 | 2 _..IVTESFIW chr3@1003  | 1.89E-10 | 0.004645 |
| 13July2011 | 3352  | 513.6  | -15.3997 | 3 R.SAPLTGH chr3@2751    | 1.79E-11 | 2.57E-04 |
| 13July2011 | 11828 | 691.36 | 16.268   | 3 _..RTHTSSC chr5@8131   | 1.32E-10 | 0.001931 |
| 13July2011 | 3660  | 632.37 | -12.1402 | 2 K.RMDLMK chr2@5800     | 2.12E-10 | 0.003422 |
| 13July2011 | 15458 | 798.92 | -27.6023 | 4 R.FFPAKRQ chr5@4549    | 4.08E-10 | 0.008885 |
| 13July2011 | 410   | 551.32 | 4.732185 | 3 K.KFFKKKFi chr2@1422   | 1.87E-10 | 0.003176 |
| 13July2011 | 12751 | 634.36 | -13.8769 | 3 R.M+15.99 chr3@5064    | 9.15E-11 | 0.001808 |
| 13July2011 | 18507 | 994.18 | 15.67721 | 3 R.CWNLELI Splice@chr   | 2.50E-11 | 4.95E-04 |
| 13July2011 | 18463 | 994.17 | 5.595075 | 3 R.CWNLELI Splice@chr   | 2.74E-10 | 0.004499 |
| 13July2011 | 18552 | 994.18 | 15.67721 | 3 R.CWNLELI Splice@chr   | 3.87E-10 | 0.005546 |
| 13July2011 | 1628  | 581.3  | 19.42474 | 2 K.TITTYWM Splice@chr   | 1.22E-10 | 0.004312 |
| 13July2011 | 13994 | 709.95 | -12.3973 | 2 K.ISEKLLK+ chr4@1402   | 3.97E-10 | 0.006966 |
| 13July2011 | 4282  | 534.34 | -21.7938 | 3 K.RSK+14.0 chr2@4170   | 4.08E-10 | 0.007054 |
| 13July2011 | 5232  | 584.7  | 3.346167 | 5 R.CSTM+15 Splice@chr   | 1.57E-11 | 7.52E-04 |
| 13July2011 | 7445  | 442.01 | 3.774806 | 4 K.SLK+14.0 chr2@2546   | 4.54E-10 | 0.008492 |
| 13July2011 | 6871  | 629.31 | -9.51992 | 2 R.SPYHQRC chr2@1363    | 1.96E-10 | 0.004218 |
| 13July2011 | 2151  | 632.33 | 4.791105 | 2 K.RTNKMN chr1@1350     | 5.07E-10 | 0.009079 |
| 13July2011 | 10062 | 878.47 | -8.69477 | 1 K.EFGIVWK chr3@9182    | 2.30E-10 | 0.007519 |
| 13July2011 | 585   | 414.88 | 22.41647 | 3 S.VITDSAPF chrX@1631   | 2.40E-10 | 0.00415  |
| 13July2011 | 3174  | 746.4  | 17.35956 | 1 R.MSPVNA Splice@chr    | 2.15E-10 | 0.006926 |
| 13July2011 | 11486 | 875.44 | -14.0713 | 2 K.PLK+14.0 chr2@1070   | 9.48E-11 | 0.002389 |
| 13July2011 | 2952  | 541.25 | -22.595  | 2 R.TISSDNG chr2@8609    | 1.58E-11 | 3.12E-04 |
| 13July2011 | 399   | 495.26 | -0.67919 | 2 _..KGSQQA chr2@1003    | 2.04E-10 | 0.00551  |
| 13July2011 | 896   | 734.34 | -15.8967 | 2 _..YFSATFK+ Splice@chr | 9.27E-11 | 0.001227 |
| 13July2011 | 2344  | 573.3  | -25.8087 | 3 K.IINSCALK chr2@3187   | 4.20E-10 | 0.007409 |
| 13July2011 | 309   | 586.3  | -23.742  | 2 R.NHRNKLC chr5@1656    | 1.39E-10 | 0.002355 |
| 13July2011 | 1450  | 596.3  | -23.5813 | 2 K.K+14.016 chr1@1349   | 3.21E-10 | 0.007591 |
| 13July2011 | 3531  | 492.58 | -26.9013 | 3 K.NLPAEK+ chr3@1359    | 3.88E-11 | 7.13E-04 |
| 13July2011 | 7323  | 579.35 | -23.4282 | 2 R.KMSRKGi Splice@chr   | 1.82E-10 | 0.004892 |
| 13July2011 | 11477 | 664.37 | -19.7508 | 3 R.AKNELKR chrX@1149    | 4.38E-10 | 0.009544 |
| 13July2011 | 13135 | 708.38 | 17.98574 | 3 R.SGVVNLH Splice@chr   | 9.69E-12 | 0        |
| 13July2011 | 7011  | 954.49 | 5.657239 | 3 K.NYFQIEQ chrX@1361    | 1.65E-10 | 0.002915 |
| 13July2011 | 12222 | 617.3  | -20.8619 | 2 R.RK+14.01 chr4@2133   | 5.12E-10 | 0.007865 |
| 13July2011 | 8304  | 520.25 | -12.6706 | 4 R.RHSWSK- chrX@1566    | 5.69E-11 | 0.001597 |
| 13July2011 | 8847  | 582.32 | 14.48959 | 4 R.EYSISGAF chr4@1277   | 3.63E-10 | 0.006125 |
| 13July2011 | 13292 | 668.36 | -22.417  | 3 R.HRK+14.0 chr5@1585   | 4.10E-10 | 0.008471 |
| 13July2011 | 6398  | 632.34 | -7.69016 | 2 R.KDISFWE Splice@chr   | 4.26E-10 | 0.008823 |
| 13July2011 | 17049 | 837.44 | -29.3132 | 2 K.M+15.99 chrX@1041    | 6.39E-10 | 0.009671 |
| 13July2011 | 6841  | 604.32 | -14.8784 | 3 K.TVLSGM+ chr4@1297    | 3.41E-10 | 0.006555 |
| 13July2011 | 4867  | 511.95 | -22.6961 | 3 K.REILAVFV Splice@chr  | 8.37E-11 | 0.001808 |
| 13July2011 | 5434  | 884.12 | 7.740796 | 3 K.RDLSFHQ chrX@6395    | 1.30E-10 | 0.00488  |
| 13July2011 | 3057  | 636.34 | -19.8857 | 2 R.IVYLM+1 Splice@chr   | 2.86E-10 | 0.008197 |

|            |       |        |          |                         |          |          |
|------------|-------|--------|----------|-------------------------|----------|----------|
| 13July2011 | 9628  | 525.27 | -18.754  | 3 K.SSSLNDR chr2@1034   | 2.16E-10 | 0.005007 |
| 13July2011 | 3503  | 443.23 | 10.35155 | 2 R.ITDSGHQ chr3@1063   | 2.88E-10 | 0.005474 |
| 13July2011 | 3328  | 671.38 | -10.1576 | 2 R.KSHIWQI Splice@chr  | 1.30E-10 | 0.001966 |
| 13July2011 | 9352  | 666.38 | -18.0175 | 3 K.LVNNNIK chr4@1598   | 1.10E-10 | 0.003564 |
| 13July2011 | 10281 | 666.38 | -18.0175 | 3 K.LVNNNIK chr4@1598   | 2.25E-10 | 0.007752 |
| 13July2011 | 12034 | 666.38 | -18.0175 | 3 K.LVNNNIK chr4@1598   | 2.00E-11 | 0.001787 |
| 13July2011 | 9964  | 666.38 | -18.0175 | 3 K.LVNNNIK chr4@1598   | 1.33E-10 | 0.003548 |
| 13July2011 | 5391  | 573.31 | 14.5044  | 2 _DLEWTV\ chr1@1081    | 3.47E-11 | 0.002365 |
| 13July2011 | 3190  | 671.38 | 18.11861 | 2 K.GRAENTV chr5@1732   | 4.52E-10 | 0.009196 |
| 13July2011 | 13500 | 632.84 | 11.97858 | 2 _M+15.99 Splice@chr   | 3.88E-10 | 0.009122 |
| 13July2011 | 9258  | 816.42 | -25.7025 | 1 R.SPDVNKF chrX@9627   | 5.67E-10 | 0.008897 |
| 13July2011 | 3668  | 467.6  | -4.18592 | 3 R.GTELIGS\ chr4@9926  | 1.12E-10 | 0.003897 |
| 13July2011 | 3909  | 467.6  | -4.18592 | 3 R.GTELIGS\ chr4@9926  | 2.52E-10 | 0.006905 |
| 13July2011 | 8118  | 719.34 | -19.8821 | 2 I.VVDDSGS chrX@6739   | 4.80E-10 | 0.009575 |
| 13July2011 | 17335 | 813.09 | -14.31   | 3 K.KSVGGRL chr2@1229   | 2.63E-10 | 0.007052 |
| 13July2011 | 14073 | 704.13 | 19.648   | 4 R.STRSSFIN Splice@chr | 2.60E-10 | 0.004936 |
| 13July2011 | 15597 | 715.4  | -19.9917 | 2 _FKNYYLIN chr5@3175   | 2.99E-10 | 0.008178 |
| 13July2011 | 8808  | 477.27 | 0.738404 | 4 R.ISLLVEMI Splice@chr | 4.52E-11 | 0.00254  |
| 13July2011 | 15312 | 889.49 | -16.1168 | 2 K.NDKLNFI\ chr4@1703  | 2.99E-10 | 0.005554 |
| 13July2011 | 8468  | 653.71 | -27.8033 | 3 K.KSQVIME chr4@7764   | 2.33E-10 | 0.008988 |
| 13July2011 | 5984  | 537.29 | 28.08363 | 2 K.NAGVETC chr4@1544   | 3.76E-11 | 0.001414 |
| 13July2011 | 17044 | 673.9  | 17.68792 | 2 K.IESFEKLP chrX@5490  | 7.68E-11 | 0.001695 |
| 13July2011 | 2822  | 590.81 | 21.70067 | 2 R.MSTITSQ chrX@3718   | 3.93E-10 | 0.009355 |
| 13July2011 | 1869  | 590.81 | 21.70067 | 2 R.MSTITSQ chrX@3718   | 4.17E-10 | 0.007289 |
| 13July2011 | 1788  | 590.81 | 21.70067 | 2 R.MSTITSQ chrX@3718   | 1.44E-10 | 0.003614 |
| 13July2011 | 12390 | 914.97 | 1.83866  | 2 R.YM+15.9 chr4@1194   | 2.35E-10 | 0.009208 |
| 13July2011 | 6026  | 571.87 | 27.37163 | 2 R.KKRENLN chr4@1644   | 3.60E-10 | 0.008406 |
| 13July2011 | 3824  | 412.76 | 2.001146 | 2 K.VTVRPPR chr2@1234   | 4.86E-10 | 0.009891 |
| 13July2011 | 469   | 544.29 | 17.07677 | 2 K.QNFIHET chr1@5247   | 4.01E-10 | 0.008734 |
| 13July2011 | 6454  | 575.67 | -13.5948 | 3 K.CVFPLLL\ chr2@1444  | 3.41E-10 | 0.008438 |
| 13July2011 | 10642 | 774.43 | -16.2888 | 3 K.TSKVTK+ chrX@7435   | 2.42E-10 | 0.006183 |
| 13July2011 | 469   | 466.59 | -10.3126 | 3 K.THMNQL chr5@9857    | 3.07E-10 | 0.004698 |
| 13July2011 | 645   | 466.59 | -10.3126 | 3 K.THMNQL chr5@9857    | 1.24E-10 | 0.002766 |
| 13July2011 | 692   | 466.59 | -10.3126 | 3 K.THMNQL chr5@9857    | 2.14E-10 | 0.004544 |
| 13July2011 | 5648  | 531.79 | -21.3879 | 2 K.LSQFEGIL chr4@1018  | 2.51E-10 | 0.004248 |
| 13July2011 | 5245  | 531.79 | -21.3879 | 2 K.LSQFEGIL chr4@1018  | 1.27E-10 | 0.001966 |
| 13July2011 | 3688  | 531.79 | -21.3879 | 2 K.LSQFEGIL chr4@1018  | 2.60E-10 | 0.007292 |
| 13July2011 | 4058  | 531.79 | -21.3879 | 2 K.LSQFEGIL chr4@1018  | 2.42E-10 | 0.005633 |
| 13July2011 | 15484 | 613.31 | -23.7022 | 3 R.WTMGRF chr5@1299    | 2.88E-10 | 0.005474 |
| 13July2011 | 14838 | 626.34 | 28.20846 | 4 A.PKESLECI chrX@1046  | 1.89E-11 | 2.81E-04 |
| 13July2011 | 7555  | 467.59 | -16.6234 | 3 R.RRVSGNI Splice@chr  | 4.63E-10 | 0.009134 |
| 13July2011 | 18847 | 996.53 | 10.13664 | 3 A.TCEQLVN chrX@1524   | 4.74E-10 | 0.007002 |
| 13July2011 | 8747  | 649.01 | 14.48261 | 3 _NLDVGEE Splice@chr   | 1.57E-10 | 0.002814 |
| 13July2011 | 6994  | 917.42 | 21.4328  | 3 _NNYQYG Splice@chr    | 5.46E-11 | 0.002342 |
| 13July2011 | 836   | 449.73 | 15.50651 | 2 R.HVPSESS chr5@3956   | 1.71E-10 | 0.005738 |
| 13July2011 | 3818  | 437.76 | -7.05721 | 2 _KMLGAN chr3@3688     | 3.38E-10 | 0.008374 |
| 13July2011 | 14331 | 633.3  | 11.35311 | 2 R.NSNVDG Splice@chr   | 2.08E-10 | 0.006008 |

|            |       |        |          |                          |          |          |
|------------|-------|--------|----------|--------------------------|----------|----------|
| 13July2011 | 16340 | 567.64 | 23.17434 | 3 _ .FSFGQLLI Splice@chr | 3.73E-10 | 0.008085 |
| 13July2011 | 13988 | 787.43 | -27.3184 | 3 R.FDLQK+1 chr2@9289    | 4.36E-10 | 0.006222 |
| 13July2011 | 7443  | 655.42 | -8.48724 | 2 K.KKK+14.C chr5@1845   | 2.32E-10 | 0.005625 |
| 13July2011 | 19064 | 809.44 | -5.32457 | 2 K.FIMKIFYR chr4@1454   | 5.08E-10 | 0.007781 |
| 13July2011 | 10773 | 615.69 | -24.8687 | 3 R.TIAEKADI chr4@1271   | 6.70E-11 | 0.001462 |
| 13July2011 | 13855 | 824.4  | -28.612  | 4 K.FDDEM+ chr5@5596     | 2.30E-10 | 0.003033 |
| 13July2011 | 14132 | 534.62 | 0.686287 | 3 K.NGASK+1 chr2@1377    | 2.34E-10 | 0.004377 |
| 13July2011 | 8464  | 716.4  | 12.02985 | 2 K.FLVNSPFI chr1@2262   | 9.76E-11 | 0.00301  |
| 13July2011 | 3848  | 400.2  | 23.34277 | 3 K.RGVADSI chr3@8812    | 5.42E-10 | 0.008989 |
| 13July2011 | 12127 | 675.67 | 26.83948 | 3 R.AKCGDSC chr2@1438    | 2.53E-10 | 0.008837 |
| 13July2011 | 7948  | 588.63 | 8.835106 | 3 K.FQSLNNF chrX@1178    | 8.76E-12 | 8.19E-04 |
| 13July2011 | 3989  | 407.23 | 1.352258 | 2 K.FPLPDPK chr4@5070    | 3.46E-10 | 0.007956 |
| 13July2011 | 11637 | 658.04 | -0.55737 | 3 K.KSSRAQV chr2@9085    | 1.64E-10 | 0.006375 |
| 13July2011 | 14571 | 664.85 | 21.21079 | 2 R.NEQLNKI chr2@1038    | 2.19E-10 | 0.005153 |
| 13July2011 | 13805 | 576.32 | -22.8917 | 3 R.IQNWLLV Splice@chr   | 2.36E-10 | 0.006183 |
| 13July2011 | 14175 | 595.67 | -22.5115 | 3 K.EIQLETGI chr1@7162   | 2.69E-10 | 0.004811 |
| 13July2011 | 13962 | 595.68 | -5.6792  | 3 K.EIQLETGI chr1@7162   | 5.46E-11 | 5.59E-04 |
| 13July2011 | 14874 | 595.67 | -22.5115 | 3 K.EIQLETGI chr1@7162   | 2.52E-10 | 0.004046 |
| 13July2011 | 14717 | 595.67 | -22.5115 | 3 K.EIQLETGI chr1@7162   | 5.46E-11 | 0.001167 |
| 13July2011 | 19    | 549.61 | -28.8515 | 3 K.CFQLEYI chrX@3614    | 4.49E-10 | 0.007859 |
| 13July2011 | 4316  | 448.23 | -4.50546 | 3 K.NTNFAM chrX@1000     | 1.15E-10 | 0.004511 |
| 13July2011 | 13839 | 766.9  | 11.7148  | 2 Q.NVACQLI chr3@8153    | 3.76E-10 | 0.008669 |
| 13July2011 | 9055  | 765.37 | -13.814  | 4 K.KDSHGTC chr4@6845    | 3.74E-10 | 0.009802 |
| 13July2011 | 4066  | 446.72 | -15.0776 | 2 R.KSADDID chr5@1425    | 2.22E-10 | 0.005653 |
| 13July2011 | 3880  | 642.86 | -4.27913 | 2 K.HLTQTL chrX@6555     | 3.72E-10 | 0.009639 |
| 13July2011 | 11218 | 481.28 | 5.337578 | 2 R.VELLNAF Splice@chr   | 1.07E-10 | 0.001962 |
| 13July2011 | 11273 | 481.28 | 5.337578 | 2 R.VELLNAF Splice@chr   | 1.42E-10 | 0.002699 |
| 13July2011 | 11876 | 481.28 | 5.337578 | 2 R.VELLNAF Splice@chr   | 2.51E-10 | 0.004141 |
| 13July2011 | 12150 | 481.28 | 5.337578 | 2 R.VELLNAF Splice@chr   | 2.14E-10 | 0.003605 |
| 13July2011 | 11178 | 481.28 | 5.337578 | 2 R.VELLNAF Splice@chr   | 1.42E-10 | 0.002355 |
| 13July2011 | 7100  | 505.78 | -27.6891 | 4 _ .LLFSSYK chr4@1521   | 8.69E-11 | 0.001227 |
| 13July2011 | 6502  | 619.36 | 8.390092 | 2 R.RSTLGYA chr4@1412    | 1.18E-10 | 0.001317 |
| 13July2011 | 3184  | 744.45 | 7.388879 | 2 K.IVKKFYK+ Splice@chr  | 2.24E-10 | 0.007752 |
| 13July2011 | 4472  | 417.71 | -28.7077 | 2 K.FVPENTK chr3@1002    | 2.95E-10 | 0.004912 |
| 13July2011 | 4162  | 460.24 | -13.8886 | 2 _ .DVVSASS Splice@chr  | 1.15E-10 | 0.004511 |
| 13July2011 | 1003  | 513.77 | -22.6156 | 4 K.FPAISVIA chr1@2020   | 1.47E-10 | 0.004505 |
| 13July2011 | 11345 | 666.01 | -16.704  | 3 _ .SITASPA+ Splice@chr | 6.75E-11 | 0.003495 |
| 13July2011 | 9339  | 702.38 | 27.23878 | 2 K.SDMDLKI chr1@1215    | 2.76E-10 | 0.009714 |
| 13July2011 | 10231 | 566.28 | -22.6503 | 3 _ .VEIEIGDII chr5@4958 | 3.28E-10 | 0.0076   |
| 13July2011 | 1529  | 474.29 | 10.78209 | 2 K.VSGRFRP chr5@1863    | 4.25E-10 | 0.008188 |
| 13July2011 | 1480  | 535.27 | -28.712  | 3 K.AEKEK+1 chr3@5623    | 4.99E-11 | 0.002342 |
| 13July2011 | 7034  | 752.69 | -15.677  | 3 K.FMISAEIF chr4@1002   | 3.23E-10 | 0.008106 |
| 13July2011 | 12965 | 543.08 | 15.91279 | 4 R.IISSICPSK chr5@3327  | 4.31E-10 | 0.008924 |
| 13July2011 | 361   | 530.78 | -21.5438 | 2 R.VEISGKS/ chr2@3362   | 3.36E-10 | 0.009092 |
| 13July2011 | 462   | 530.78 | -21.5438 | 2 R.VEISGKS/ chr2@3362   | 1.76E-10 | 0.00388  |
| 13July2011 | 10569 | 653.83 | -12.4346 | 4 P.MLLMK+ chr5@1702     | 2.34E-10 | 0.005801 |
| 13July2011 | 16016 | 781.88 | -26.1839 | 2 L.VYNDK+1 Splice@chr   | 2.86E-10 | 0.007443 |

|            |       |        |          |                         |          |          |
|------------|-------|--------|----------|-------------------------|----------|----------|
| 13July2011 | 14048 | 731.37 | -1.22567 | 3 K.SWK+14. chr1@1381   | 1.16E-10 | 0.003622 |
| 13July2011 | 3056  | 483.94 | -29.4046 | 3 K.VSQGLN/ chr1@6239   | 4.47E-11 | 0.001988 |
| 13July2011 | 9641  | 772.1  | -8.44304 | 3 R.TTRPARS chr4@1126   | 7.50E-11 | 0.005541 |
| 13July2011 | 7     | 424.23 | 24.66144 | 2 R.QNYPTPK chr4@8157   | 1.72E-10 | 0.003606 |
| 13July2011 | 13857 | 737.43 | -5.38869 | 3 K.KIFFFKK+ chr5@1908  | 3.62E-10 | 0.007246 |
| 13July2011 | 1120  | 474.29 | 0.325015 | 2 K.VSGKSIIS chr2@1314  | 2.92E-10 | 0.008197 |
| 13July2011 | 15848 | 918.11 | -28.4709 | 3 R.KCSIPAIC chr5@4632  | 2.05E-10 | 0.00459  |
| 13July2011 | 247   | 471.25 | -15.2291 | 3 K.FSRK+14. Splice@chr | 4.10E-10 | 0.007923 |
| 13July2011 | 13273 | 531.64 | 5.641086 | 3 K.SVANPTC chr2@1250   | 4.00E-10 | 0.005643 |
| 13July2011 | 2502  | 422.74 | 10.46398 | 4 R.KFPIAAHI chr1@5588  | 1.91E-10 | 0.006691 |
| 13July2011 | 12766 | 708.94 | 22.13212 | 2 _KLSAPFQ chr3@6536    | 2.07E-10 | 0.004385 |
| 13July2011 | 7119  | 799.39 | -16.3451 | 4 K.QNYSK+1 chr5@7867   | 9.85E-11 | 0.00473  |
| 13July2011 | 1407  | 745.03 | -20.106  | 3 R.YISSTTSR chrX@4345  | 1.91E-10 | 0.007073 |
| 13July2011 | 15940 | 909.44 | 4.210425 | 3 K.HFRGVM chrX@2802    | 2.63E-10 | 0.003353 |
| 13July2011 | 6336  | 730.01 | -26.6628 | 3 _NDYIHK+ Splice@chr   | 1.92E-10 | 0.009364 |
| 13July2011 | 7374  | 766.43 | 15.84203 | 3 R.SQPLLLN Splice@chr  | 1.84E-11 | 0.00274  |
| 13July2011 | 5960  | 651.34 | -0.13924 | 2 P.TYFAVSEI chrX@5965  | 3.29E-10 | 0.008951 |
| 13July2011 | 16358 | 676.35 | -23.9191 | 3 R.ENQLYVK Splice@chr  | 1.88E-10 | 0.003128 |
| 13July2011 | 12627 | 435.56 | -27.154  | 3 K.M+15.99 chr5@9685   | 2.59E-10 | 0.005293 |
| 13July2011 | 16466 | 864.17 | -2.23922 | 3 K.FNLIFQTL chr3@2760  | 4.05E-10 | 0.007102 |
| 13July2011 | 6482  | 601.67 | -4.74192 | 3 R.DKNEFIV Splice@chr  | 2.26E-10 | 0.004854 |
| 13July2011 | 15342 | 647.82 | -15.9471 | 4 R.NVQLRGI Splice@chr  | 4.06E-10 | 0.005643 |
| 13July2011 | 15039 | 695.36 | -17.2065 | 3 R.K+14.016 Splice@chr | 2.14E-12 | 1.43E-04 |
| 13July2011 | 8560  | 662.86 | -1.0597  | 2 K.FNIAVFD chr5@1485   | 4.42E-10 | 0.008471 |
| 13July2011 | 8668  | 662.86 | -1.0597  | 2 K.FNIAVFD chr5@1485   | 4.35E-10 | 0.008333 |
| 13July2011 | 11965 | 538.97 | 16.4136  | 3 K.YTINCRVI chr1@1168  | 1.66E-10 | 0.002814 |
| 13July2011 | 8534  | 578.32 | -2.90804 | 2 K.IAVISYHS chr4@1560  | 1.78E-10 | 0.004402 |
| 13July2011 | 15029 | 916.48 | -14.5741 | 2 _KFNFKKS chr2@6775    | 3.94E-10 | 0.006614 |
| 13July2011 | 7345  | 732.06 | -24.8061 | 3 K.TNFVRIE chr5@9800   | 3.34E-10 | 0.01     |
| 13July2011 | 7757  | 748.4  | -12.2971 | 2 K.FIMSGYF chr3@1207   | 1.70E-10 | 0.008969 |
| 13July2011 | 4444  | 537.28 | -28.6044 | 3 K.FQNLEVC chr4@9805   | 4.16E-10 | 0.00944  |
| 13July2011 | 5111  | 537.28 | -28.6044 | 3 K.FQNLEVC chr4@9805   | 1.41E-10 | 0.003023 |
| 13July2011 | 5060  | 537.28 | -28.6044 | 3 K.FQNLEVC chr4@9805   | 2.72E-10 | 0.006223 |
| 13July2011 | 3595  | 443.26 | -25.8341 | 2 K.SIGLGKGI chr2@1315  | 5.36E-10 | 0.009738 |
| 13July2011 | 8195  | 853.43 | 28.45068 | 3 R.NIMETQI chr2@5488   | 1.41E-10 | 0.004325 |
| 13July2011 | 4715  | 461.25 | -15.3485 | 3 R.LNLSSCSI chrX@8297  | 3.74E-10 | 0.007204 |
| 13July2011 | 17391 | 892.45 | -26.0648 | 2 R.M+15.99 chr1@6330   | 4.01E-10 | 0.008364 |
| 13July2011 | 18942 | 892.47 | -3.66379 | 2 R.M+15.99 chr1@6330   | 5.22E-10 | 0.009258 |
| 13July2011 | 18008 | 892.47 | -3.66379 | 2 R.M+15.99 chr1@6330   | 2.63E-10 | 0.004599 |
| 13July2011 | 8018  | 656.01 | 5.15616  | 3 R.SM+15.9 chr4@4874   | 6.49E-10 | 0.009956 |
| 13July2011 | 4693  | 576.27 | -9.18368 | 2 _NFEENRV Splice@chr   | 5.41E-10 | 0.009738 |
| 13July2011 | 11277 | 757.71 | -20.4333 | 3 K.KSPFLSQI chr3@2257  | 7.66E-11 | 0.001695 |
| 13July2011 | 7448  | 661.36 | 6.285156 | 2 I.M+15.995 chr1@8350  | 3.39E-10 | 0.00874  |
| 13July2011 | 9873  | 710.36 | 25.69899 | 3 R.NTK+14.( chr4@1632  | 4.10E-10 | 0.00944  |
| 13July2011 | 8981  | 551.69 | -12.0588 | 5 _RLK+14.0 chr2@8234   | 4.05E-10 | 0.007102 |
| 13July2011 | 18518 | 777.09 | -1.33662 | 3 _MYYGIFY chr2@8631    | 3.19E-10 | 0.00496  |
| 13July2011 | 12303 | 732.39 | 21.18005 | 3 K.SFADVDC Splice@chr  | 1.42E-11 | 9.65E-04 |

|            |       |         |          |                          |          |          |
|------------|-------|---------|----------|--------------------------|----------|----------|
| 13July2011 | 17861 | 1120.61 | -14.6972 | 2 R.SLEYRNV chr5@8520    | 4.86E-12 | 3.25E-04 |
| 13July2011 | 9626  | 871.46  | -14.5659 | 3 K.KIQTM chrX@1460      | 1.33E-10 | 0.001788 |
| 13July2011 | 12405 | 624.36  | -23.3031 | 3 R.NLTSNLLI chr5@5504   | 2.11E-11 | 0.001131 |
| 13July2011 | 12014 | 616.66  | 5.023069 | 3 R.KRVCAFT chr5@1035    | 2.74E-11 | 0.00274  |
| 13July2011 | 8250  | 463.24  | 16.83594 | 2 K.TCLAAFSI chrX@1625   | 3.14E-10 | 0.008133 |
| 13July2011 | 7533  | 745.39  | -1.06593 | 2 R.NNTK+14 chr2@7805    | 2.04E-11 | 5.61E-04 |
| 13July2011 | 7867  | 447.73  | -18.3079 | 2 _FGASLQG chr3@8415     | 4.07E-10 | 0.006778 |
| 13July2011 | 4404  | 425.2   | -18.5739 | 3 K.FMNSFKI chrX@1534    | 1.70E-10 | 0.003606 |
| 13July2011 | 95    | 410.24  | 6.91786  | 3 K.AYVIFGKI chr5@1087   | 1.05E-10 | 0.001647 |
| 13July2011 | 18376 | 754.64  | 2.613451 | 4 K.GTPISDII Splice@chr  | 4.18E-11 | 0.00103  |
| 13July2011 | 1213  | 534.26  | -21.1743 | 2 R.FMHTEKI chrX@7018    | 5.61E-10 | 0.008788 |
| 13July2011 | 7673  | 652.35  | 16.96121 | 2 K.NWKNW chr2@1855      | 1.55E-10 | 0.001679 |
| 13July2011 | 4054  | 508.77  | -6.91642 | 2 R.ALSANKH chr5@3676    | 4.21E-10 | 0.00944  |
| 13July2011 | 4887  | 508.78  | 12.81644 | 2 R.ALSANKH Splice@chr   | 3.24E-10 | 0.008461 |
| 13July2011 | 3694  | 508.77  | -6.91642 | 2 R.ALSANKH Splice@chr   | 3.65E-10 | 0.009903 |
| 13July2011 | 12820 | 670.15  | 28.82446 | 4 K.VERLTAK chr2@5121    | 3.24E-10 | 0.009812 |
| 13July2011 | 12667 | 573.6   | -19.7299 | 3 _SPTLSSVT Splice@chr   | 6.64E-11 | 0.002241 |
| 13July2011 | 998   | 824.42  | 5.559382 | 1 _YNASLEK chrX@1444     | 4.33E-10 | 0.009033 |
| 13July2011 | 2734  | 789.41  | -23.8187 | 2 K.FLHVYKFI chr4@1304   | 1.77E-10 | 0.005738 |
| 13July2011 | 15300 | 991.85  | 0.103422 | 3 _YDWYSGI chrX@2606     | 3.88E-10 | 0.007824 |
| 13July2011 | 16757 | 803.75  | -27.6754 | 3 K.NFFVSEIF chr3@4386   | 5.64E-11 | 0.001329 |
| 13July2011 | 16175 | 803.75  | -27.6754 | 3 K.NFFVSEIF chr3@4386   | 2.00E-10 | 0.0034   |
| 13July2011 | 9180  | 599.91  | -25.1793 | 5 K.INIGK+14 chr4@3910   | 1.26E-10 | 0.006208 |
| 13July2011 | 1646  | 454.71  | 0.403581 | 4 K.AK+14.01 chr1@1244   | 3.62E-10 | 0.007849 |
| 13July2011 | 8987  | 584.7   | -10.4386 | 5 _K+14.016 chr2@1300    | 2.14E-10 | 0.003601 |
| 13July2011 | 1164  | 516.31  | -8.76488 | 2 K.KTITGRDI chrX@4227   | 2.97E-10 | 0.007564 |
| 13July2011 | 17560 | 934.47  | 18.09037 | 2 V.FNEIM+1 Splice@chr   | 3.08E-10 | 0.004698 |
| 13July2011 | 8384  | 695.36  | 23.08954 | 3 _DYGMSK chr5@1820      | 1.60E-11 | 6.15E-04 |
| 13July2011 | 17429 | 803.47  | 23.62982 | 3 R.SFHFLIK chr1@3207    | 3.07E-10 | 0.00557  |
| 13July2011 | 1176  | 619.33  | -18.4586 | 1 K.VGTSGAK chrX@1441    | 3.17E-10 | 0.00489  |
| 13July2011 | 1233  | 619.33  | -18.4586 | 1 K.VGTSGAK chrX@1441    | 3.75E-10 | 0.005452 |
| 13July2011 | 8892  | 690.86  | -25.1127 | 4 R.WPRPPIL chr1@1222    | 1.20E-11 | 0.002128 |
| 13July2011 | 17951 | 807.47  | -19.6014 | 2 G.M+15.99 chr4@6144    | 1.98E-10 | 0.003161 |
| 13July2011 | 7838  | 709.74  | -28.5906 | 3 R.ELKKVLK chr3@2047    | 1.10E-10 | 0.003465 |
| 13July2011 | 13543 | 847.75  | -18.645  | 3 K.NNFTKN chr5@1127     | 1.38E-10 | 0.002907 |
| 13July2011 | 17801 | 992.18  | -13.5305 | 3 R.RCISDALI chr2@4875   | 3.82E-10 | 0.008655 |
| 13July2011 | 4417  | 527.95  | -12.1233 | 3 _K+14.016 chrX@9378    | 2.20E-10 | 0.006612 |
| 13July2011 | 15703 | 705.37  | -8.14532 | 2 R.KHSPRGE chr1@1500    | 5.56E-11 | 0.001564 |
| 13July2011 | 7452  | 509.27  | -19.6137 | 3 R.TFFIFITKI Splice@chr | 5.07E-11 | 8.20E-04 |
| 13July2011 | 15286 | 1129.1  | -7.98299 | 2 S.PPK+14.0 chrX@7427   | 1.70E-10 | 0.003606 |
| 13July2011 | 4320  | 664.33  | -0.92014 | 2 R.ETPINSGL chr4@1385   | 1.23E-10 | 0.002767 |
| 13July2011 | 5183  | 791.92  | -24.3853 | 2 K.RIGLEEG chr4@1007    | 6.97E-11 | 0.002268 |
| 13July2011 | 4871  | 791.92  | -24.3853 | 2 K.RIGLEEG chr4@1007    | 1.00E-10 | 0.001527 |
| 13July2011 | 4644  | 791.92  | -24.3853 | 2 K.RIGLEEG chr4@1007    | 1.57E-10 | 0.005296 |
| 13July2011 | 3616  | 791.92  | -24.3853 | 2 K.RIGLEEG chr4@1007    | 2.81E-10 | 0.006504 |
| 13July2011 | 3857  | 791.92  | -24.3853 | 2 K.RIGLEEG chr4@1007    | 1.15E-10 | 0.00315  |
| 13July2011 | 3799  | 791.92  | -24.3853 | 2 K.RIGLEEG chr4@1007    | 1.45E-10 | 0.003614 |

|            |       |         |          |                         |          |          |
|------------|-------|---------|----------|-------------------------|----------|----------|
| 13July2011 | 3808  | 791.92  | -24.3853 | 2 K.RIGLEEGS chr4@1007  | 3.27E-10 | 0.009087 |
| 13July2011 | 9366  | 616.32  | -26.2857 | 4 _FLPEKSLS chr3@1082   | 1.58E-10 | 0.00393  |
| 13July2011 | 1821  | 533.79  | -24.1349 | 2 S.VTVLTGY chr5@5060   | 4.42E-10 | 0.007161 |
| 13July2011 | 16838 | 833.44  | 22.52011 | 3 R.ATDAK+1 Splice@chr  | 3.52E-10 | 0.008707 |
| 13July2011 | 17151 | 833.44  | 22.52011 | 3 R.ATDAK+1 Splice@chr  | 5.63E-10 | 0.009301 |
| 13July2011 | 10086 | 561.06  | -23.3037 | 4 K.AELK+14. chr1@9272  | 2.13E-10 | 0.006686 |
| 13July2011 | 14186 | 715.39  | -11.4123 | 2 K.ELVTTKR chr2@6919   | 4.73E-10 | 0.007827 |
| 13July2011 | 14453 | 685.97  | -14.3104 | 2 K.KKRLKERI chrX@1391  | 3.45E-10 | 0.008232 |
| 13July2011 | 14379 | 668.73  | 3.168821 | 3 K.K+14.016 chr1@1247  | 2.97E-10 | 0.005215 |
| 13July2011 | 9657  | 564.03  | -28.1848 | 4 R.K+14.016 chrX@1023  | 5.37E-10 | 0.009765 |
| 13July2011 | 8874  | 564.03  | -28.1848 | 4 R.K+14.016 chrX@1023  | 2.98E-10 | 0.007152 |
| 13July2011 | 9763  | 709.06  | -22.1628 | 3 L.NRKFNKII chr3@2209  | 1.29E-10 | 0.003793 |
| 13July2011 | 2901  | 401.19  | 14.56572 | 2 K.FACFGVT Splice@chr  | 3.81E-10 | 0.006382 |
| 13July2011 | 202   | 713.46  | -8.48117 | 2 R.LRLSSRIR chr5@3233  | 1.73E-10 | 0.003606 |
| 13July2011 | 6208  | 511.93  | -2.15029 | 3 R.VAFSYGN chr3@5185   | 1.90E-11 | 9.42E-04 |
| 13July2011 | 6114  | 511.93  | -2.15029 | 3 R.VAFSYGN chr3@5185   | 2.54E-10 | 0.004009 |
| 13July2011 | 8656  | 532.28  | 5.464242 | 2 R.TENTESIL chr3@7559  | 1.81E-10 | 0.003056 |
| 13July2011 | 17043 | 1039.85 | -16.2939 | 3 R.FFHFPYSI chr2@6332  | 9.45E-11 | 0.002262 |
| 13July2011 | 10222 | 861.49  | 25.44562 | 2 R.RLGGM+1 chrX@5680   | 1.59E-10 | 0.009509 |
| 13July2011 | 4546  | 573.31  | -3.94598 | 2 K.K+14.016 chrX@6993  | 4.77E-10 | 0.008697 |
| 13July2011 | 1569  | 659.35  | 5.9335   | 2 K.LSKNTNF chr3@6973   | 4.11E-11 | 8.43E-04 |
| 13July2011 | 1711  | 411.24  | -6.17441 | 2 K.YDVIALK. Splice@chr | 4.29E-10 | 0.009992 |
| 13July2011 | 5569  | 640.31  | 3.723404 | 2 R.RMPLCCS chr1@3654   | 4.84E-10 | 0.009313 |
| 13July2011 | 18378 | 959.01  | -23.5518 | 2 V.SK+14.01 chr1@9948  | 3.59E-10 | 0.006125 |
| 13July2011 | 1383  | 437.25  | -27.0021 | 2 R.AIAANGS chr4@9263   | 3.15E-10 | 0.006555 |
| 13July2011 | 11419 | 705.38  | -24.5903 | 3 K.KDEQNNQ chr5@2044   | 5.51E-10 | 0.008338 |
| 13July2011 | 12195 | 850.11  | 3.066974 | 3 K.FFLAKSRF chr4@9753  | 7.31E-11 | 0.002354 |
| 13July2011 | 14299 | 715.92  | -5.89079 | 2 R.K+14.016 chrX@1525  | 2.13E-10 | 0.007448 |
| 13July2011 | 8146  | 496.76  | 28.99472 | 2 R.QTGNLSN chr3@1190   | 3.99E-10 | 0.007923 |
| 13July2011 | 14253 | 698.67  | 11.35052 | 3 _LFEKNDQ chrX@1388    | 3.99E-10 | 0.009525 |
| 13July2011 | 10624 | 681.11  | -29.1535 | 4 K.K+14.016 chr5@1885  | 4.96E-11 | 0.001098 |
| 13July2011 | 1243  | 833.41  | -2.1264  | 1 _RDEAQSK Splice@chr   | 4.56E-10 | 0.007624 |
| 13July2011 | 2150  | 522.83  | 10.05913 | 2 K.KKTLIQAI chr3@2724  | 1.11E-10 | 0.004269 |
| 13July2011 | 2286  | 522.83  | 10.05913 | 2 K.KKTLIQAI chr3@2724  | 1.36E-10 | 0.004529 |
| 13July2011 | 10024 | 722.37  | -22.9012 | 2 R.NCPK+14 chrX@1515   | 3.01E-10 | 0.005485 |
| 13July2011 | 8324  | 665.67  | -26.8745 | 3 R.INLNK+1 Splice@chr  | 2.79E-10 | 0.004811 |
| 13July2011 | 577   | 557.31  | -26.8797 | 2 K.KEHSKVF chr3@6150   | 4.38E-10 | 0.007347 |
| 13July2011 | 746   | 557.31  | -26.8797 | 2 K.KEHSKVF chr3@6150   | 3.12E-10 | 0.00489  |
| 13July2011 | 8610  | 550.34  | 6.041881 | 3 K.PKTK+14. chr3@1213  | 2.33E-10 | 0.004837 |
| 13July2011 | 11603 | 550.54  | -4.52707 | 4 R.SRM+15. chr1@6067   | 5.18E-10 | 0.007865 |
| 13July2011 | 5277  | 496.27  | -7.84995 | 3 K.KNEKVEN chr5@9399   | 3.41E-10 | 0.005818 |
| 13July2011 | 2467  | 467.74  | -13.2731 | 2 R.EAESGKS chr2@7061   | 2.97E-10 | 0.006599 |
| 13July2011 | 2003  | 432.22  | 23.49673 | 2 _LPMMESI Splice@chr   | 1.85E-10 | 0.005012 |
| 13July2011 | 1561  | 432.22  | 23.49673 | 2 _LPMMESI Splice@chr   | 5.72E-10 | 0.008504 |
| 13July2011 | 1423  | 432.22  | 23.49673 | 2 _LPMMESI Splice@chr   | 1.85E-10 | 0.004402 |
| 13July2011 | 14864 | 689.39  | 17.61502 | 3 K.CQNSK+1 chr4@8145   | 3.86E-10 | 0.008085 |
| 13July2011 | 16057 | 1023.01 | -19.2084 | 2 R.K+14.016 Splice@chr | 2.38E-10 | 0.006739 |

|            |       |         |          |                          |          |          |
|------------|-------|---------|----------|--------------------------|----------|----------|
| 13July2011 | 6431  | 511.59  | -10.8382 | 3 R.GDAGSIP chr2@3521    | 1.48E-10 | 0.003656 |
| 13July2011 | 6386  | 511.59  | -10.8382 | 3 R.GDAGSIP chr2@3521    | 1.18E-10 | 0.002466 |
| 13July2011 | 7107  | 511.59  | -10.8382 | 3 R.GDAGSIP chr2@3521    | 1.21E-13 | 0        |
| 13July2011 | 7530  | 511.59  | -10.8382 | 3 R.GDAGSIP chr2@3521    | 3.44E-11 | 6.06E-04 |
| 13July2011 | 6473  | 511.59  | -10.8382 | 3 R.GDAGSIP chr2@3521    | 1.46E-10 | 0.002355 |
| 13July2011 | 17160 | 792.4   | -3.23919 | 4 V.PFNEFVD chr2@6619    | 4.19E-10 | 0.008823 |
| 13July2011 | 2379  | 409.73  | -22.7479 | 4 Q.FSVKINN chr5@1809    | 2.34E-10 | 0.004168 |
| 13July2011 | 14854 | 1043.53 | -11.9268 | 3 K.IMKSTES chr1@1325    | 5.36E-11 | 7.73E-04 |
| 13July2011 | 14250 | 867.78  | -9.10713 | 3 _QVDFLPE Splice@chr    | 2.97E-10 | 0.007497 |
| 13July2011 | 9518  | 691.88  | 3.533816 | 2 R.KWQFLAI chr2@2888    | 3.80E-10 | 0.009903 |
| 13July2011 | 3457  | 535.61  | 17.48048 | 3 Q.RAIEEEN chrX@1381    | 3.06E-10 | 0.005787 |
| 13July2011 | 3485  | 535.61  | 17.48048 | 3 Q.RAIEEEN chrX@1381    | 3.85E-10 | 0.006606 |
| 13July2011 | 7828  | 604.32  | 20.97569 | 3 K.IFEKNVQ chr1@1425    | 3.18E-10 | 0.008461 |
| 13July2011 | 12786 | 875.49  | 1.326121 | 2 K.K+14.016 chr4@9177   | 2.84E-10 | 0.00777  |
| 13July2011 | 3190  | 464.26  | -25.2082 | 3 K.LK+14.01 chr2@3179   | 4.05E-10 | 0.008974 |
| 13July2011 | 13698 | 781.39  | 12.65075 | 3 K.M+15.99 Splice@chr   | 1.52E-11 | 9.65E-04 |
| 13July2011 | 15052 | 781.39  | 12.65075 | 3 K.M+15.99 Splice@chr   | 7.36E-12 | 3.12E-04 |
| 13July2011 | 15668 | 781.39  | 12.65075 | 3 K.M+15.99 Splice@chr   | 1.57E-11 | 8.80E-04 |
| 13July2011 | 456   | 403.23  | -20.0299 | 3 K.KKFKSGK chr2@1197    | 2.83E-10 | 0.008156 |
| 13July2011 | 17359 | 898.18  | 20.13746 | 3 K.SRIK+14.1 Splice@chr | 1.35E-10 | 0.002889 |
| 13July2011 | 9194  | 588.05  | -23.081  | 4 K.IADLSCK+ chr2@5667   | 6.50E-10 | 0.009427 |
| 13July2011 | 2214  | 429.23  | -29.2181 | 2 R.YTVYIAK. Splice@chr  | 2.99E-10 | 0.007613 |
| 13July2011 | 8951  | 489.77  | -16.6708 | 4 K.RKHAQQ chrX@7778     | 1.25E-10 | 0.003448 |
| 13July2011 | 3930  | 460.78  | -14.018  | 2 K.LIVDKFGI chr3@1208   | 2.31E-10 | 0.005007 |
| 13July2011 | 5167  | 462.57  | -11.284  | 3 R.ITSCFSLT' Splice@chr | 1.54E-10 | 0.003778 |
| 13July2011 | 13794 | 635.34  | 18.57072 | 2 K.NCLKAEN chr2@3509    | 1.13E-10 | 0.001846 |
| 13July2011 | 933   | 619.33  | -18.4586 | 1 R.VGTGTGT chr4@1435    | 2.37E-10 | 0.00314  |
| 13July2011 | 17507 | 888.48  | -8.11529 | 4 K.FK+14.01 chrX@1408   | 4.01E-10 | 0.009455 |
| 13July2011 | 3923  | 764.36  | 8.075696 | 1 R.DSGKDSF Splice@chr   | 5.74E-10 | 0.009007 |
| 13July2011 | 8646  | 499.28  | -11.3163 | 3 _RRWRDR Splice@chr     | 3.73E-10 | 0.0093   |
| 13July2011 | 9891  | 684.87  | 0.357003 | 2 _FEFDNK+ Splice@chr    | 4.37E-10 | 0.009418 |
| 13July2011 | 6613  | 684.87  | 0.357003 | 2 _FEFDNK+ Splice@chr    | 4.32E-10 | 0.009405 |
| 13July2011 | 5644  | 684.87  | 0.357003 | 2 _FEFDNK+ Splice@chr    | 4.15E-10 | 0.007681 |
| 13July2011 | 11265 | 803.47  | 28.70074 | 3 S.KCRK+14. chrX@5761   | 1.11E-11 | 0.002128 |
| 13July2011 | 14890 | 729.44  | -13.3224 | 2 R.QKSSKINI chr1@1409   | 3.33E-10 | 0.008951 |
| 13July2011 | 92    | 543.77  | -27.8875 | 2 K.WLEDWII Splice@chr   | 2.75E-10 | 0.008137 |
| 13July2011 | 16213 | 679.36  | -11.2513 | 3 _IFSFKGQI Splice@chr   | 2.78E-10 | 0.005382 |
| 13July2011 | 18029 | 947.51  | -1.83766 | 2 K.FDNKILT' chr4@2622   | 1.54E-10 | 0.003433 |
| 13July2011 | 2700  | 545.97  | 27.40315 | 3 R.FSGNLNS chr1@1891    | 8.98E-11 | 0.001928 |
| 13July2011 | 10412 | 683.65  | -25.4675 | 4 K.K+14.016 chr4@1321   | 4.83E-10 | 0.009244 |
| 13July2011 | 16468 | 971.5   | -12.2251 | 3 ?.RREKIAES Splice@chr  | 3.96E-10 | 0.008966 |
| 13July2011 | 659   | 501.28  | -10.0042 | 3 K.K+14.016 chr4@1692   | 3.15E-10 | 0.006903 |
| 13July2011 | 5990  | 538.29  | -20.5215 | 2 _LDAKSGS chr4@1316     | 1.57E-11 | 0.001164 |
| 13July2011 | 8655  | 644.36  | -24.9819 | 3 _RLIHK+14 chr5@1434    | 1.26E-10 | 0.004303 |
| 13July2011 | 17469 | 1058.89 | -20.5258 | 3 R.ARGGRAI chrX@9648    | 3.62E-10 | 0.005484 |
| 13July2011 | 18030 | 767.75  | -14.8381 | 3 K.TFLKNPK' chr3@1045   | 2.76E-11 | 5.37E-04 |
| 13July2011 | 16224 | 767.75  | -14.8381 | 3 K.TFLKNPK' chr3@1045   | 2.11E-10 | 0.005279 |

|            |       |         |          |                         |          |          |
|------------|-------|---------|----------|-------------------------|----------|----------|
| 13July2011 | 14400 | 767.75  | -14.8381 | 3 K.TFLKNPK chr3@1045   | 4.19E-10 | 0.009706 |
| 13July2011 | 10756 | 698.84  | -20.6981 | 2 E.M+15.99 chr2@1874   | 2.56E-10 | 0.005293 |
| 13July2011 | 5410  | 502.59  | 14.68357 | 3 K.FTKFHQN chr2@4105   | 3.99E-10 | 0.006777 |
| 13July2011 | 19176 | 1013.56 | 10.16313 | 2 R.NGK+14.1 Splice@chr | 4.70E-10 | 0.008219 |
| 13July2011 | 7498  | 603.32  | -10.6063 | 3 K.LTKLNYI Splice@chr  | 6.18E-11 | 0.001156 |
| 13July2011 | 8038  | 603.32  | -10.6063 | 3 K.LTKLNYI Splice@chr  | 3.53E-10 | 0.006106 |
| 13July2011 | 4502  | 451.51  | 24.45519 | 4 K.KNQEKTT chr2@1200   | 2.81E-10 | 0.006658 |
| 13July2011 | 15610 | 661.35  | -3.7896  | 2 K.M+15.99 Splice@chr  | 3.63E-10 | 0.005595 |
| 13July2011 | 1758  | 565.28  | -20.8382 | 2 K.EK+14.01 chr1@3456  | 3.09E-10 | 0.006108 |
| 13July2011 | 6480  | 443.26  | 2.349567 | 3 R.SRRRSQR chr3@1161   | 3.38E-10 | 0.008891 |
| 13July2011 | 16777 | 813.09  | -20.042  | 3 K.KFLDFAI chrX@7854   | 5.20E-10 | 0.009317 |
| 13July2011 | 12830 | 664.7   | -3.83263 | 3 R.TPLVPTEI chr2@1108  | 2.58E-10 | 0.004577 |
| 13July2011 | 5331  | 764.9   | -28.0442 | 2 V.KIINIFAFI chrX@1192 | 2.69E-10 | 0.007941 |
| 13July2011 | 16756 | 807.07  | -1.28689 | 3 _ETTCLSLI Splice@chr  | 2.96E-11 | 2.81E-04 |
| 13July2011 | 13893 | 1060.54 | 26.46883 | 1 R.FGKSFCM chr1@1386   | 3.84E-10 | 0.009781 |
| 13July2011 | 4689  | 649.34  | -11.0145 | 2 R.EPEIYMLI chr5@3859  | 3.26E-10 | 0.008333 |
| 13July2011 | 13186 | 785.92  | -4.39489 | 2 K.IVYFSK+1 chr4@1604  | 3.71E-10 | 0.008669 |
| 13July2011 | 2360  | 458.27  | 25.89571 | 2 K.GTIVMA chr5@1316    | 2.72E-10 | 0.007809 |
| 13July2011 | 443   | 459.26  | 19.37969 | 2 R.LEESSKPK Splice@chr | 3.28E-10 | 0.008271 |
| 13July2011 | 770   | 459.26  | 19.37969 | 2 R.LEESSKPK Splice@chr | 3.28E-10 | 0.009162 |
| 13July2011 | 14139 | 682.06  | -24.4952 | 3 _EALKIHKI chr1@9839   | 6.48E-10 | 0.009865 |
| 13July2011 | 10666 | 786.92  | 29.30871 | 4 _EISCHLK+ chr4@7011   | 2.13E-10 | 0.004931 |
| 13July2011 | 10548 | 786.92  | 29.30871 | 4 _EISCHLK+ chr4@7011   | 1.41E-10 | 0.002355 |
| 13July2011 | 15627 | 786.47  | 16.44697 | 2 R.EREK+14 chr2@1260   | 1.99E-10 | 0.007448 |
| 13July2011 | 8239  | 831.93  | 3.525839 | 2 K.IMLK+14 chrX@3385   | 1.74E-10 | 0.00388  |
| 13July2011 | 992   | 454.25  | 21.70768 | 2 R.RSMRNSI chr5@1004   | 3.55E-10 | 0.008557 |
| 13July2011 | 1627  | 454.25  | 21.70768 | 2 R.RSMRNSI chr5@1004   | 4.68E-10 | 0.008115 |
| 13July2011 | 1193  | 454.25  | 21.70768 | 2 R.RSMRNSI chr5@1004   | 3.19E-10 | 0.006816 |
| 13July2011 | 1215  | 454.25  | 21.70768 | 2 R.RSMRNSI chr5@1004   | 4.62E-10 | 0.009462 |
| 13July2011 | 231   | 516.59  | -14.1266 | 3 K.PMCK+14 chrX@1787   | 4.47E-10 | 0.007819 |
| 13July2011 | 8303  | 485.52  | 26.37518 | 4 K.HDSTM+ chr5@3281    | 1.07E-10 | 0.00212  |
| 13July2011 | 10167 | 473.92  | 1.290625 | 3 K.K+14.016 chr4@2636  | 4.42E-10 | 0.007506 |
| 13July2011 | 251   | 441.89  | -12.2363 | 3 K.NVQK+14 Splice@chr  | 2.11E-10 | 0.008314 |
| 13July2011 | 10237 | 635.98  | -5.19059 | 3 K.TREEVEI Splice@chr  | 2.84E-10 | 0.004499 |
| 13July2011 | 13303 | 736.87  | -14.2661 | 2 K.NNM+15 chrX@4709    | 6.15E-10 | 0.009661 |
| 13July2011 | 16813 | 573.67  | -0.85265 | 3 _ISSIRFTLL chr5@1405  | 2.83E-10 | 0.007497 |
| 13July2011 | 6976  | 602.06  | -29.7386 | 4 R.K+14.016 chr3@1309  | 3.79E-10 | 0.008085 |
| 13July2011 | 11236 | 498.78  | 0.306542 | 2 R.FKQFAVE Splice@chr  | 2.89E-10 | 0.006426 |
| 13July2011 | 12178 | 498.78  | 0.306542 | 2 R.FKQFAVE Splice@chr  | 2.95E-10 | 0.005215 |
| 13July2011 | 11915 | 498.78  | 0.306542 | 2 R.FKQFAVE Splice@chr  | 2.80E-10 | 0.005481 |
| 13July2011 | 4213  | 443.24  | -2.94433 | 3 R.LERSRSSL Splice@chr | 1.96E-10 | 0.004312 |
| 13July2011 | 4270  | 443.24  | -2.94433 | 3 R.LERSRSSL Splice@chr | 2.04E-10 | 0.00459  |
| 13July2011 | 3750  | 455.58  | -19.8398 | 3 R.RIGK+14 Splice@chr  | 5.27E-11 | 0.002342 |
| 13July2011 | 15658 | 1058.9  | 14.84708 | 3 _NLQRMK chr5@1242     | 2.74E-11 | 0.001787 |
| 13July2011 | 11425 | 664.37  | -19.7508 | 3 R.AKNELKR chrX@1149   | 1.94E-10 | 0.004524 |
| 13July2011 | 14186 | 876.51  | -18.0997 | 2 K.NQAIQNI chr2@9182   | 4.01E-10 | 0.008364 |
| 13July2011 | 14138 | 876.51  | -18.0997 | 2 K.NQAIQNI chr2@9182   | 2.28E-10 | 0.005598 |

|            |       |        |          |                         |          |          |
|------------|-------|--------|----------|-------------------------|----------|----------|
| 13July2011 | 14296 | 876.51 | -18.0997 | 2 K.NQAIQNI chr2@9182   | 1.42E-10 | 0.004775 |
| 13July2011 | 14245 | 876.51 | -18.0997 | 2 K.NQAIQNI chr2@9182   | 1.64E-10 | 0.005634 |
| 13July2011 | 14348 | 876.51 | -18.0997 | 2 K.NQAIQNI chr2@9182   | 1.14E-10 | 0.004187 |
| 13July2011 | 13915 | 876.5  | -29.5392 | 2 K.NQAIQNI chr2@9182   | 1.99E-10 | 0.003077 |
| 13July2011 | 11680 | 876.51 | -18.0997 | 2 K.NQAIQNI chr2@9182   | 8.40E-11 | 0.003008 |
| 13July2011 | 1557  | 556.78 | -7.13828 | 2 R.VLNNHW chr1@4639    | 1.75E-10 | 0.006798 |
| 13July2011 | 1527  | 437.24 | -1.67844 | 2 R.RAIDNGA chr5@1159   | 1.05E-10 | 0.004553 |
| 13July2011 | 897   | 432.57 | 8.824279 | 3 R.SFITWED chr2@1885   | 8.83E-11 | 0.001255 |
| 13July2011 | 15442 | 549.6  | 16.21801 | 3 R.GNWM+ chr1@9647     | 2.59E-10 | 0.006911 |
| 13July2011 | 6999  | 703.03 | 4.205233 | 3 R.TNLRLTM Splice@chr  | 1.92E-10 | 0.007365 |
| 13July2011 | 8607  | 550.29 | 20.96471 | 3 K.TFQNNSE chr4@2947   | 3.25E-10 | 0.00669  |
| 13July2011 | 1275  | 460.26 | 0.667572 | 2 K.QMLSSKF chrX@2676   | 2.09E-10 | 0.00524  |
| 13July2011 | 9243  | 523.77 | 1.634574 | 2 R.AVGEMA chrX@1481    | 1.95E-10 | 0.005009 |
| 13July2011 | 9532  | 523.77 | 1.634574 | 2 R.AVGEMA chrX@1481    | 3.50E-12 | 6.71E-04 |
| 13July2011 | 1957  | 419.56 | -2.4304  | 3 R.LAYSKMK chr4@1519   | 7.40E-11 | 0.002354 |
| 13July2011 | 328   | 530.78 | -21.5438 | 2 R.IEVSGKS/ chr1@3245  | 2.84E-10 | 0.006514 |
| 13July2011 | 5000  | 471.28 | 10.90222 | 2 R.KVETVHT chr5@1155   | 2.40E-10 | 0.003878 |
| 13July2011 | 4583  | 471.28 | 10.90222 | 2 R.KVETVHT chr5@1155   | 2.50E-10 | 0.003254 |
| 13July2011 | 1613  | 508.27 | 10.82916 | 2 K.FPENGNI chr5@9455   | 4.67E-10 | 0.008286 |
| 13July2011 | 2069  | 508.27 | 10.82916 | 2 K.FPENGNI chr5@9455   | 4.27E-10 | 0.007946 |
| 13July2011 | 1787  | 508.27 | 10.82916 | 2 K.FPENGNI chr5@9455   | 1.88E-10 | 0.007586 |
| 13July2011 | 7044  | 601.41 | 18.46833 | 2 K.ILKILGM+ Splice@chr | 2.19E-10 | 0.009034 |
| 13July2011 | 211   | 477.25 | 15.59035 | 2 _ENDYGK\ Splice@chr   | 1.72E-10 | 0.005738 |
| 13July2011 | 3472  | 489.28 | 10.50031 | 2 R.RATTFAT chr3@5998   | 1.19E-10 | 0.003697 |
| 13July2011 | 6881  | 717.37 | -6.26516 | 2 R.FQFFFQS chr2@7015   | 3.34E-10 | 0.01     |
| 13July2011 | 9508  | 931.78 | -7.58671 | 3 _SQVREM- Splice@chr   | 3.45E-10 | 0.005155 |
| 13July2011 | 1465  | 498.93 | -2.86019 | 3 R.HTCMHK chr4@1056    | 4.21E-11 | 0.001887 |
| 13July2011 | 10030 | 807.07 | -15.225  | 3 R.QTANRQ chr2@1188    | 2.08E-10 | 0.003918 |
| 13July2011 | 10950 | 733.05 | -28.2202 | 3 R.EIQLSIK+ chr4@1678  | 2.23E-11 | 3.77E-04 |
| 13July2011 | 4219  | 634.77 | -20.4165 | 2 R.RFSPECSI chr2@3948  | 1.37E-10 | 0.003221 |
| 13July2011 | 288   | 488.27 | -24.0722 | 2 K.QTDVSV\ chrX@1428   | 2.42E-10 | 0.005832 |
| 13July2011 | 4104  | 576.33 | 1.451968 | 3 R.TVCIAVT/ chr2@1038  | 1.43E-10 | 0.004325 |
| 13July2011 | 453   | 422.23 | -7.96944 | 2 R.FRAGHQI chrX@1354   | 3.29E-10 | 0.007376 |
| 13July2011 | 15760 | 557.64 | -0.87721 | 3 S.HTYLFSFL chr5@1019  | 3.77E-10 | 0.005873 |
| 13July2011 | 18653 | 680.39 | -27.7122 | 3 S.MK+14.0 chrX@5894   | 4.83E-10 | 0.009244 |
| 13July2011 | 16524 | 818.77 | 1.990319 | 3 R.DK+14.0 chr5@1070   | 2.70E-10 | 0.004494 |
| 13July2011 | 6438  | 462.59 | -15.1622 | 3 R.QIAGIEN\ chr3@1179  | 4.93E-11 | 9.13E-04 |
| 13July2011 | 11394 | 779.39 | -24.3597 | 3 R.YSNPK+1 chr5@1246   | 1.40E-10 | 0.008468 |
| 13July2011 | 3779  | 615.85 | -26.8719 | 2 R.KIEENSIK chr4@8752  | 2.94E-10 | 0.006092 |
| 13July2011 | 14209 | 899.48 | -13.3825 | 4 K.VENSGN\ chr5@2039   | 4.53E-10 | 0.009196 |
| 13July2011 | 9915  | 773.63 | 9.661359 | 4 P.QTRQFSS Splice@chr  | 2.43E-10 | 0.004031 |
| 13July2011 | 12058 | 674.59 | -3.17144 | 4 K.FHFLNSIC chr4@8448  | 9.64E-11 | 0.0034   |
| 13July2011 | 15108 | 815.76 | 21.90978 | 3 K.MRSGW\ Splice@chr   | 1.70E-10 | 0.002721 |
| 13July2011 | 651   | 403.24 | 20.13139 | 3 E.IFSK+14.( chrX@1764 | 2.70E-10 | 0.007576 |
| 13July2011 | 13102 | 663.36 | -15.7572 | 2 _QNHNLPi chrX@1544    | 1.37E-11 | 3.58E-04 |
| 13July2011 | 12869 | 663.37 | -0.64503 | 2 _QNHNLPi chrX@1544    | 3.70E-10 | 0.007387 |
| 13July2011 | 14115 | 663.37 | -0.64503 | 2 _QNHNLPi chrX@1544    | 3.95E-10 | 0.006733 |

|            |       |         |          |                         |          |          |
|------------|-------|---------|----------|-------------------------|----------|----------|
| 13July2011 | 14168 | 663.37  | -0.64503 | 2 _ .QNHNLPi chrX@154   | 3.60E-10 | 0.006287 |
| 13July2011 | 7293  | 414.89  | -27.5967 | 3 R.LNDTLDC chr1@509    | 2.04E-10 | 0.003281 |
| 13July2011 | 2347  | 440.74  | 17.37265 | 2 R.SSSVIGSS chr3@672   | 5.08E-10 | 0.009087 |
| 13July2011 | 2351  | 498.31  | 15.23659 | 2 R.LLPNPAE chr1@714    | 1.30E-10 | 0.004411 |
| 13July2011 | 336   | 493.29  | 10.72474 | 2 K.KNTKHV Splice@chr   | 4.49E-10 | 0.008759 |
| 13July2011 | 10936 | 711.92  | -18.6847 | 2 R.K+14.016 Splice@chr | 3.43E-10 | 0.008911 |
| 13July2011 | 13250 | 1074.9  | -3.77058 | 3 K.CHRDQRI Splice@chr  | 1.74E-10 | 0.004359 |
| 13July2011 | 5562  | 791.42  | -1.85326 | 2 K.KIKKEGG chrX@783    | 4.05E-10 | 0.007492 |
| 13July2011 | 6329  | 474.27  | 0.902769 | 2 P.YGVVDRF chr2@136    | 3.64E-10 | 0.008085 |
| 13July2011 | 7059  | 516.6   | -24.0698 | 3 K.VSVM+1 chr5@250     | 2.90E-10 | 0.005314 |
| 13July2011 | 6846  | 469.76  | -5.27339 | 2 R.YTSARGR chr4@716    | 4.08E-10 | 0.007581 |
| 13July2011 | 2173  | 401.56  | -6.19665 | 3 _ .RKDSSAV Splice@chr | 4.90E-10 | 0.009331 |
| 13July2011 | 1916  | 401.56  | -6.19665 | 3 _ .RKDSSAV Splice@chr | 1.73E-10 | 0.004611 |
| 13July2011 | 1503  | 401.56  | -6.19665 | 3 _ .RKDSSAV Splice@chr | 3.60E-10 | 0.009781 |
| 13July2011 | 8140  | 551.07  | -11.5163 | 4 _ .PIFYIKIFN chr4@580 | 1.37E-10 | 0.00346  |
| 13July2011 | 9283  | 641.58  | 2.312343 | 4 R.STQFAV chr1@137     | 4.35E-10 | 0.007493 |
| 13July2011 | 18717 | 1058.89 | -11.1544 | 3 R.LVLHQKL Splice@chr  | 5.86E-11 | 0.001051 |
| 13July2011 | 7662  | 593.66  | -18.3747 | 3 _ .AK+14.01 chrX@128  | 1.85E-10 | 0.003538 |
| 13July2011 | 12864 | 638.36  | -26.9089 | 2 K.DFLIILWI Splice@chr | 3.37E-10 | 0.008232 |
| 13July2011 | 3013  | 505.74  | 10.33927 | 2 K.AFDNEVC chrX@482    | 3.28E-13 | 0        |
| 13July2011 | 5510  | 528.95  | -12.4537 | 3 K.EPIINVFS Splice@chr | 2.29E-10 | 0.005292 |
| 13July2011 | 7272  | 555.29  | -27.1611 | 3 K.VFCNYILK chr2@626   | 2.84E-10 | 0.007152 |
| 13July2011 | 1760  | 425.73  | -1.43706 | 2 K.LEGYGRR chr3@103    | 2.96E-10 | 0.005554 |
| 13July2011 | 12725 | 913.99  | -11.4702 | 2 K.K+14.016 chrX@134   | 3.15E-10 | 0.006555 |
| 13July2011 | 2808  | 454.25  | -7.72065 | 3 _ .PLNFRNT chrX@236   | 1.27E-10 | 0.004411 |
| 13July2011 | 7970  | 612.34  | 0.451404 | 2 R.IDGSGKE chrX@116    | 4.27E-11 | 8.20E-04 |
| 13July2011 | 16976 | 828.43  | 2.458854 | 3 K.TYWSFTR Splice@chr  | 1.91E-10 | 0.003659 |
| 13July2011 | 17935 | 828.42  | -9.63871 | 3 K.TYWSFTR Splice@chr  | 5.54E-10 | 0.008335 |
| 13July2011 | 17841 | 752.38  | -21.6429 | 3 D.SRYRWIL Splice@chr  | 3.89E-10 | 0.007783 |
| 13July2011 | 8548  | 530.28  | 23.75628 | 3 _ .IEVINCKN chr5@655  | 2.27E-10 | 0.004854 |
| 13July2011 | 17667 | 754.86  | -4.98117 | 2 K.IDFFFQW chr2@112    | 4.55E-10 | 0.006897 |
| 13July2011 | 7100  | 511.59  | -3.90497 | 3 R.RCAGSAC chr5@193    | 2.26E-10 | 0.005598 |
| 13July2011 | 5486  | 559.31  | -8.45423 | 3 R.KDQIIQKI chr3@448   | 1.34E-10 | 0.005853 |
| 13July2011 | 10078 | 738.05  | -18.0873 | 3 V.CENLFKK chr2@989    | 4.14E-10 | 0.008885 |
| 13July2011 | 958   | 416.56  | -11.1625 | 3 K.ETNKQKC chr4@116    | 3.19E-10 | 0.006816 |
| 13July2011 | 9876  | 576.35  | -12.4885 | 3 K.NVKCLA Splice@chr   | 1.08E-10 | 0.001907 |
| 13July2011 | 1115  | 494.77  | -4.76172 | 2 R.LVEGGSN Splice@chr  | 2.66E-10 | 0.004868 |
| 13July2011 | 1303  | 494.77  | -4.76172 | 2 R.LVEGGSN Splice@chr  | 3.43E-12 | 6.71E-04 |
| 13July2011 | 7990  | 617.32  | -23.4702 | 4 K.TRDLAGI chr1@616    | 7.32E-11 | 9.55E-04 |
| 13July2011 | 2487  | 407.71  | -27.4408 | 4 K.KHINERA chr3@415    | 3.57E-10 | 0.009543 |
| 13July2011 | 11371 | 779.42  | -29.3027 | 2 R.KFNLEKI chrX@165    | 7.07E-12 | 8.77E-04 |
| 13July2011 | 11279 | 773.36  | -26.9468 | 2 R.SRICYWY chr3@978    | 4.26E-11 | 0.001197 |
| 13July2011 | 10773 | 773.86  | -29.1186 | 2 R.SRICYWY chr3@978    | 7.02E-11 | 0.005541 |
| 13July2011 | 1448  | 466.25  | -28.533  | 2 K.LNWMVL chrX@928     | 4.13E-10 | 0.007281 |
| 13July2011 | 5847  | 771.44  | 26.30239 | 3 K.NLNVTKR chr4@141    | 1.32E-10 | 0.00346  |
| 13July2011 | 16098 | 899.48  | -0.74725 | 4 _ .KRIENVEI chr2@562  | 4.20E-10 | 0.009995 |
| 13July2011 | 20865 | 984.82  | -14.7074 | 3 K.SGTIFDNI Splice@chr | 9.76E-11 | 0.002684 |

|            |       |        |          |                         |          |          |
|------------|-------|--------|----------|-------------------------|----------|----------|
| 13July2011 | 17699 | 984.82 | -14.7074 | 3 K.SGTIFDNI Splice@chr | 5.27E-10 | 0.008474 |
| 13July2011 | 891   | 617.31 | -26.4415 | 2 R.KNMQNI chr4@1702    | 1.34E-10 | 0.002897 |
| 13July2011 | 2619  | 402.23 | 13.23488 | 2 R.FPGDLVR chr1@1305   | 4.94E-10 | 0.008151 |
| 13July2011 | 2121  | 402.23 | 13.23488 | 2 R.FPGDLVR chr1@1305   | 6.19E-10 | 0.008802 |
| 13July2011 | 10405 | 620.32 | -22.5354 | 2 R.AK+14.01 chr1@1038  | 1.25E-10 | 0.002027 |
| 13July2011 | 13954 | 771.07 | -26.7363 | 3 K.SIIQQTG/ Splice@chr | 2.02E-11 | 7.52E-04 |
| 13July2011 | 18420 | 752.38 | -5.84864 | 3 K.CLSATVSI chr5@1678  | 3.20E-10 | 0.005818 |
| 13July2011 | 4444  | 957.53 | -18.8872 | 1 K.REVGLAA chr2@9746   | 1.98E-10 | 0.003161 |
| 13July2011 | 10392 | 547.8  | 3.795232 | 2 K.SVLSLVSS chr1@6207  | 3.55E-10 | 0.009622 |
| 13July2011 | 8864  | 598.59 | 3.472665 | 4 _IIASLVAM Splice@chr  | 1.67E-10 | 0.004088 |
| 13July2011 | 2147  | 462.75 | -25.1805 | 2 K.IYSLATTR chr2@7277  | 1.92E-10 | 0.004562 |
| 13July2011 | 11554 | 571.97 | -20.0966 | 3 K.K+14.016 chrX@1367  | 1.25E-10 | 0.004693 |
| 13July2011 | 2444  | 539.64 | -2.15299 | 3 R.TWNRLH chr2@1074    | 1.83E-10 | 0.002838 |
| 13July2011 | 5145  | 544.35 | 20.51988 | 3 R.NIINK+14 chr2@5495  | 2.49E-10 | 0.00674  |
| 13July2011 | 5059  | 534.64 | 20.05447 | 3 K.PQK+14.( chr1@3225  | 1.43E-10 | 0.003793 |
| 13July2011 | 17985 | 891.46 | -28.582  | 2 R.KSFRK+1+ Splice@chr | 5.03E-10 | 0.009079 |
| 13July2011 | 3511  | 579.32 | -6.60009 | 2 R.KVSIIDYIY chrX@1097 | 3.03E-10 | 0.007613 |
| 13July2011 | 4742  | 439.59 | 21.89573 | 3 _VFFSKTAI chr5@8525   | 1.21E-10 | 0.004106 |
| 13July2011 | 14054 | 601.8  | -20.7242 | 2 R.NAKVYTII chr2@9179  | 4.05E-10 | 0.006778 |
| 13July2011 | 3819  | 473.25 | 9.317929 | 2 R.RSDQVDI chr4@1152   | 1.80E-10 | 0.00388  |
| 13July2011 | 16605 | 793.44 | 16.94525 | 2 R.CSLVPFFI Splice@chr | 8.24E-12 | 1.26E-04 |
| 13July2011 | 16980 | 529.55 | -12.6786 | 4 R.LSLSLSLSI chr4@6754 | 3.07E-10 | 0.007567 |
| 13July2011 | 2054  | 415.74 | -11.4903 | 2 _VVGADQ chr4@1117     | 1.29E-10 | 0.004734 |
| 13July2011 | 120   | 647.96 | -22.9562 | 3 _QKCTEVC chrX@5489    | 3.17E-10 | 0.005829 |
| 13July2011 | 12237 | 552.67 | 9.263764 | 3 K.NLEITFK+ chr2@1337  | 2.17E-10 | 0.005734 |
| 13July2011 | 3107  | 516.31 | 18.55719 | 2 _K+14.016 chrX@1731   | 4.04E-10 | 0.007492 |
| 13July2011 | 6451  | 517.3  | 21.87085 | 2 R.RPAKYGV chr1@1165   | 1.02E-10 | 0.004146 |
| 13July2011 | 5854  | 517.3  | 21.87085 | 2 R.RPAKYGV chr1@1165   | 5.01E-10 | 0.008975 |
| 13July2011 | 6905  | 517.3  | 21.87085 | 2 R.RPAKYGV chr1@1165   | 1.82E-10 | 0.00388  |
| 13July2011 | 10788 | 420.73 | -29.01   | 2 K.MPGRLP/ Splice@chr  | 3.49E-10 | 0.005371 |
| 13July2011 | 5752  | 727.71 | -17.2455 | 3 K.KKLPNFQ chrX@4306   | 2.51E-10 | 0.005237 |
| 13July2011 | 3922  | 941.46 | -27.1923 | 2 N.FWRCCIV chr2@2945   | 1.09E-10 | 0.004712 |
| 13July2011 | 12712 | 729.39 | 5.530534 | 2 R.TSFTFPSS chr5@7025  | 3.06E-10 | 0.006816 |
| 13July2011 | 13183 | 559.78 | -9.50299 | 4 R.DEQRAGI chrX@6134   | 3.53E-10 | 0.006671 |
| 13July2011 | 2267  | 473.75 | -3.74414 | 2 R.RASENLE chr4@6738   | 9.77E-11 | 0.002262 |
| 13July2011 | 10590 | 782.41 | -3.51552 | 3 I.NQSSM+1 chr2@6685   | 3.83E-10 | 0.009355 |
| 13July2011 | 300   | 497.28 | -21.2763 | 2 R.KLSLVYDI chr5@4102  | 3.30E-10 | 0.006986 |
| 13July2011 | 1819  | 583.3  | 24.1089  | 2 K.EVSHFLD chrX@9694   | 2.13E-10 | 0.007412 |
| 13July2011 | 918   | 459.24 | -5.59803 | 2 K.LDGIQEN chr3@1335   | 1.81E-10 | 0.008969 |
| 13July2011 | 12588 | 678.87 | 2.881309 | 4 R.HQPNNS' chrX@1288   | 2.56E-10 | 0.006749 |
| 13July2011 | 12496 | 618.31 | 10.71843 | 3 R.WSICATC chr5@1855   | 2.35E-10 | 0.007216 |
| 13July2011 | 4569  | 557.29 | 12.65451 | 3 K.SKCK+14. chr1@6985  | 3.46E-10 | 0.00952  |
| 13July2011 | 438   | 520.26 | -23.5878 | 2 K.KGNQFT5 chr1@5568   | 7.93E-11 | 0.001342 |
| 13July2011 | 12573 | 614.99 | -0.99409 | 3 ?.KSSKDEN Splice@chr  | 4.32E-11 | 9.45E-04 |
| 13July2011 | 8689  | 627.09 | -7.09415 | 4 K.SIFSNTII chr5@1842  | 4.09E-10 | 0.006282 |
| 13July2011 | 7192  | 511.92 | 3.627502 | 3 K.CPPNCGI Splice@chr  | 3.80E-10 | 0.005982 |
| 13July2011 | 152   | 410.21 | -11.5346 | 3 R.QGSENAI chr4@2650   | 4.22E-10 | 0.008664 |

|            |       |         |          |                         |          |          |
|------------|-------|---------|----------|-------------------------|----------|----------|
| 13July2011 | 11420 | 507.25  | -24.3536 | 2 _ .NFTSNRF chr5@4159  | 2.42E-10 | 0.00674  |
| 13July2011 | 11971 | 631.33  | -25.4785 | 3 R.VAYYRKN chr4@5964   | 2.89E-10 | 0.008076 |
| 13July2011 | 10653 | 605.89  | 24.62123 | 2 K.KLRKLSY chr2@4245   | 1.07E-10 | 0.00515  |
| 13July2011 | 12233 | 799.92  | -21.3648 | 2 R.SWSPSIM chr4@3601   | 5.86E-10 | 0.009006 |
| 13July2011 | 8886  | 536.33  | -14.5938 | 2 A.VLLWRLS chr3@5499   | 2.71E-10 | 0.006529 |
| 13July2011 | 5764  | 462.58  | 25.91838 | 3 _ .SELDQNP chr2@1157  | 9.26E-11 | 0.001798 |
| 13July2011 | 12223 | 666.7   | 21.43644 | 3 R.SK+14.01 chr1@1168  | 2.71E-10 | 0.006098 |
| 13July2011 | 16576 | 747.89  | -10.8686 | 2 S.CSLCRSTF Splice@chr | 7.88E-11 | 0.002276 |
| 13July2011 | 9737  | 783.94  | -5.2231  | 2 R.ARAPPAF chr5@1920   | 3.28E-10 | 0.006812 |
| 13July2011 | 13754 | 682.87  | -1.87976 | 4 K.WKSFNF chr2@1168    | 9.52E-11 | 0.003874 |
| 13July2011 | 9454  | 573.34  | 5.514385 | 3 K.IHRKGVS chrX@6700   | 3.24E-10 | 0.006934 |
| 13July2011 | 1267  | 787.31  | 18.7075  | 2 _ .M+15.99 chr2@6542  | 1.96E-10 | 0.006372 |
| 13July2011 | 5067  | 642.86  | 12.64743 | 2 K.LHRRDM chrX@1317    | 9.10E-11 | 0.001798 |
| 13July2011 | 13465 | 711.05  | -10.0859 | 3 K.MEK+14. chr2@9208   | 3.07E-10 | 0.008318 |
| 13July2011 | 8981  | 564.64  | 5.527317 | 3 K.LSSYLAIH chr1@7875  | 5.28E-12 | 3.25E-04 |
| 13July2011 | 8612  | 564.65  | 23.29735 | 3 K.LSSYLAIH chr1@7875  | 1.15E-10 | 0.004931 |
| 13July2011 | 1905  | 449.75  | -20.9457 | 2 R.LTKHTGN chr5@1359   | 4.70E-10 | 0.008151 |
| 13July2011 | 1358  | 449.75  | -20.9457 | 2 R.LTKHTGN chr5@1359   | 1.03E-10 | 0.00473  |
| 13July2011 | 1244  | 449.75  | -20.9457 | 2 R.LTKHTGN chr5@1359   | 3.20E-10 | 0.008005 |
| 13July2011 | 7901  | 853.49  | 22.81885 | 2 K.LLIFLGNY chr4@8489  | 1.09E-10 | 0.002352 |
| 13July2011 | 16546 | 1164.13 | 27.95684 | 2 _ .KNLSQTP Splice@chr | 2.92E-10 | 0.008178 |
| 13July2011 | 21280 | 641.29  | -28.856  | 2 R.M+15.99 chrX@2854   | 5.02E-10 | 0.009789 |
| 13July2011 | 14160 | 938.83  | -21.6787 | 3 _ .QNVTEV Splice@chr  | 5.02E-10 | 0.008151 |
| 13July2011 | 11408 | 716.05  | -1.67851 | 3 _ .NDIVTVD chr3@4365  | 4.00E-10 | 0.008489 |
| 13July2011 | 2411  | 439.76  | 15.37198 | 2 K.LYGEVGL chrX@2908   | 9.74E-11 | 0.001851 |
| 13July2011 | 10567 | 771.39  | -29.8798 | 3 R.DFSSQKP chr5@1571   | 2.34E-11 | 5.31E-04 |
| 13July2011 | 16881 | 992.52  | -18.1235 | 3 R.IFSATVP chr2@4292   | 3.59E-11 | 0.001375 |
| 13July2011 | 7455  | 483.24  | -25.5028 | 4 K.VTHLAAE chrX@1530   | 2.24E-10 | 0.004066 |
| 13July2011 | 8440  | 627.67  | 22.38248 | 3 K.FGENENF chr3@2897   | 3.33E-10 | 0.00559  |
| 13July2011 | 5288  | 422.55  | -17.471  | 3 K.TICLKNYF Splice@chr | 2.32E-10 | 0.004849 |
| 13July2011 | 8741  | 799.14  | -15.2793 | 4 R.IQSK+14. Splice@chr | 1.39E-10 | 0.005631 |
| 13July2011 | 15025 | 796.43  | -2.53235 | 3 K.FFDKQFL chr1@6216   | 5.37E-10 | 0.009765 |
| 13July2011 | 11700 | 757.9   | -18.4365 | 2 K.FFVAQKV chr1@2144   | 9.11E-11 | 0.001808 |
| 13July2011 | 3791  | 570.78  | 6.381303 | 2 R.WMASM chr4@1068     | 1.39E-10 | 0.004835 |
| 13July2011 | 8055  | 515.31  | 18.9497  | 2 K.WVSITPL chr4@1030   | 3.67E-10 | 0.005452 |
| 13July2011 | 6673  | 515.31  | 18.9497  | 2 K.WVSITPL chr4@1030   | 1.84E-10 | 0.00287  |
| 13July2011 | 482   | 424.58  | 7.685191 | 3 R.KM+15.9 Splice@chr  | 1.35E-10 | 0.00545  |
| 13July2011 | 16320 | 792.67  | -2.37082 | 4 R.SEKLNFG Splice@chr  | 2.86E-11 | 7.08E-04 |
| 13July2011 | 1129  | 563.3   | -2.06239 | 2 K.KFWISSTI Splice@chr | 1.14E-10 | 0.004511 |
| 13July2011 | 1291  | 563.3   | -2.06239 | 2 K.KFWISSTI Splice@chr | 1.73E-10 | 0.00388  |
| 13July2011 | 3811  | 456.27  | 12.8705  | 3 K.TKLIINNL chr4@6321  | 4.60E-11 | 0.003523 |
| 13July2011 | 3703  | 427.72  | -25.7458 | 4 K.CVNYRIF chr3@5538   | 4.05E-10 | 0.009347 |
| 13July2011 | 5920  | 516.34  | -0.71063 | 2 K.LIKFGGLK chr1@9755  | 4.07E-10 | 0.007425 |
| 13July2011 | 15023 | 812.76  | 24.56247 | 3 K.EDDETEE Splice@chr  | 4.37E-10 | 0.009241 |
| 13July2011 | 10562 | 595.59  | -7.69885 | 4 K.LLKISVNII chr5@6288 | 2.46E-10 | 0.004288 |
| 13July2011 | 15074 | 867.48  | -15.4263 | 2 K.HKWLQR Splice@chr   | 3.80E-10 | 0.006382 |
| 13July2011 | 10358 | 559.84  | 13.21569 | 2 R.IPLPLEPS chr5@8272  | 1.62E-10 | 0.005279 |

|            |       |         |          |                            |          |          |
|------------|-------|---------|----------|----------------------------|----------|----------|
| 13July2011 | 10302 | 590.32  | -23.5099 | 2 R.RVYGGGI chr1@4912      | 5.78E-11 | 0.002512 |
| 13July2011 | 9470  | 500.95  | 3.788597 | 3 R.RSAEVVA chr4@6534      | 2.94E-10 | 0.006223 |
| 13July2011 | 8855  | 500.61  | -7.41144 | 3 R.RSAEVVA chr4@6534      | 3.06E-10 | 0.008178 |
| 13July2011 | 5925  | 588.31  | 14.61894 | 3 _WQVQM chr2@8736         | 2.27E-10 | 0.003723 |
| 13July2011 | 1237  | 484.23  | -10.5256 | 3 R.QMSRAG chr1@6541       | 3.67E-10 | 0.008085 |
| 13July2011 | 1356  | 484.23  | -10.5256 | 3 R.QMSRAG chr1@6541       | 1.96E-11 | 0.001085 |
| 13July2011 | 8514  | 569.3   | -4.94042 | 2 R.ENLLFLT C Splice@chr   | 1.49E-10 | 0.005631 |
| 13July2011 | 12901 | 859.46  | -27.8701 | 2 K.FEGKPTK chr1@5344      | 3.43E-10 | 0.008062 |
| 13July2011 | 10263 | 580.02  | 23.73333 | 3 K.TK+14.01 chrX@8325     | 1.90E-10 | 0.00551  |
| 13July2011 | 5176  | 692.4   | 16.8615  | 2 F.WK+14.0 chrX@9169      | 3.55E-10 | 0.007711 |
| 13July2011 | 7109  | 629.55  | 3.619506 | 4 T.DFSSNSLI chrX@2869     | 3.83E-10 | 0.00898  |
| 13July2011 | 3043  | 433.54  | -20.9781 | 3 K.KFRSCWS C Splice@chr   | 3.48E-10 | 0.008999 |
| 13July2011 | 6580  | 554.95  | -13.3687 | 3 R.VFPK+14 chr2@6441      | 1.21E-10 | 0.003022 |
| 13July2011 | 46    | 451.57  | -18.2994 | 3 R.KLADNSV chr2@1386      | 3.58E-10 | 0.009543 |
| 13July2011 | 18220 | 1060.55 | -12.6492 | 2 _MLVYLNL chr4@3000       | 1.09E-10 | 0.003102 |
| 13July2011 | 19028 | 901.95  | 8.536058 | 2 R.YDWGVR C Splice@chr    | 1.79E-10 | 0.002814 |
| 13July2011 | 5718  | 616.85  | 29.33696 | 2 K.GLTPM+1 chr5@3404      | 2.61E-10 | 0.007777 |
| 13July2011 | 11866 | 673.36  | 23.16165 | 3 K.SIFFNEKN chr1@1179     | 3.16E-10 | 0.005571 |
| 13July2011 | 4800  | 523.81  | 2.334929 | 2 R.IPTTSSLIS C Splice@chr | 6.92E-12 | 0        |
| 13July2011 | 4344  | 523.81  | 2.334929 | 2 R.IPTTSSLIS C Splice@chr | 3.49E-10 | 0.009105 |
| 13July2011 | 4564  | 700.82  | 7.500674 | 2 _NNVWW C Splice@chr      | 2.25E-10 | 0.005007 |
| 13July2011 | 9288  | 786.08  | -13.0609 | 3 _VSWAEEI chr5@1599       | 3.69E-10 | 0.008066 |
| 13July2011 | 3711  | 606.36  | -5.9014  | 2 R.LQHLASS C Splice@chr   | 8.01E-11 | 0.003765 |
| 13July2011 | 10117 | 904.45  | -22.2938 | 2 R.FFWFFST chr2@1368      | 7.50E-11 | 0.002995 |
| 13July2011 | 4704  | 481.27  | 5.978786 | 3 R.SKRDWSC chr4@1704      | 5.08E-10 | 0.009789 |
| 13July2011 | 1767  | 527.64  | 10.40018 | 3 K.KSEKSIID chr1@6252     | 1.82E-11 | 2.57E-04 |
| 13July2011 | 11360 | 917.45  | -22.007  | 3 S.STCASDFI C Splice@chr  | 4.72E-10 | 0.00976  |
| 13July2011 | 2500  | 537.77  | -1.02339 | 2 R.NSPNTLV chr2@1339      | 3.87E-10 | 0.007849 |
| 13July2011 | 13058 | 1016.5  | -16.9263 | 2 K.NKIM+15 chr5@9440      | 2.31E-10 | 0.00414  |
| 13July2011 | 13395 | 807.74  | 12.64105 | 3 R.K+14.016 chr1@1342     | 1.97E-10 | 0.004776 |
| 13July2011 | 14623 | 807.74  | 12.64105 | 3 R.K+14.016 chr1@1342     | 3.89E-10 | 0.006722 |
| 13July2011 | 5930  | 507.25  | -28.5329 | 3 R.SRWSRKI C Splice@chr   | 1.81E-10 | 0.004892 |
| 13July2011 | 15425 | 840.45  | 15.70543 | 2 K.FANRQIA chr2@4290      | 4.16E-10 | 0.00683  |
| 13July2011 | 389   | 578.3   | 14.16757 | 2 V.RSNDPVE C Splice@chr   | 4.10E-10 | 0.006282 |
| 13July2011 | 15836 | 921.09  | 8.292148 | 2 R.LFPKYK+1 chr2@1040     | 2.48E-10 | 0.005936 |
| 13July2011 | 16828 | 656.9   | -5.39726 | 2 K.KLLETLLF C Splice@chr  | 1.17E-10 | 0.002131 |
| 13July2011 | 1347  | 424.22  | -29.2035 | 4 K.KNCSIKW chr2@2816      | 1.11E-10 | 0.002766 |
| 13July2011 | 15201 | 583.34  | -29.2571 | 3 _LGTLLLLF chr5@1699      | 4.67E-10 | 0.007615 |
| 13July2011 | 5219  | 575.67  | 15.7194  | 3 R.DRSNTRF chrX@4883      | 3.04E-10 | 0.00892  |
| 13July2011 | 4749  | 664.69  | -20.7835 | 3 K.K+14.016 chr4@4883     | 2.39E-10 | 0.007303 |
| 13July2011 | 16556 | 587.33  | 24.50113 | 4 I.QSSGGILS chr1@7776     | 6.12E-10 | 0.009293 |
| 13July2011 | 11142 | 743.74  | -25.5289 | 3 _LKRLAKSI C Splice@chr   | 3.82E-11 | 0.002487 |
| 13July2011 | 1812  | 574.78  | 1.170129 | 2 K.IMADSIT chr4@4334      | 1.69E-10 | 0.006842 |
| 13July2011 | 9324  | 566.32  | 4.132544 | 4 _SEKK+14. C Splice@chr   | 8.74E-11 | 0.001822 |
| 13July2011 | 9565  | 566.32  | 4.132544 | 4 _SEKK+14. C Splice@chr   | 1.86E-10 | 0.003045 |
| 13July2011 | 6560  | 493.78  | -22.7899 | 2 _KQNTGGI chrX@6341       | 5.60E-10 | 0.008504 |
| 13July2011 | 11786 | 787.6   | -24.4473 | 5 R.FPETEKVI chr1@1220     | 2.10E-10 | 0.006926 |

|            |       |         |          |                         |          |          |
|------------|-------|---------|----------|-------------------------|----------|----------|
| 13July2011 | 5420  | 569.3   | -4.69132 | 3 K.MEAIK+1 chr5@1091   | 3.20E-10 | 0.007926 |
| 13July2011 | 5380  | 688.38  | -14.3491 | 2 R.PM+15.9 Splice@chr  | 1.80E-10 | 0.004402 |
| 13July2011 | 1643  | 527.64  | -23.9515 | 3 _KDRK+14 chr2@6588    | 3.50E-10 | 0.007433 |
| 13July2011 | 11361 | 789.71  | -26.5172 | 3 R.FIFNFAH! Splice@chr | 3.16E-10 | 0.006816 |
| 13July2011 | 4643  | 759.88  | 20.4845  | 2 _WLWWS! Splice@chr    | 1.65E-10 | 0.005468 |
| 13July2011 | 10771 | 579.99  | -20.8723 | 3 R.LLAM+15 chr1@4407   | 5.22E-11 | 0.002847 |
| 13July2011 | 4256  | 531.59  | -25.1297 | 3 _ISSQRCQ! chr5@1165   | 2.20E-10 | 0.003821 |
| 13July2011 | 3179  | 531.59  | -25.1297 | 3 _ISSQRCQ! chr5@1165   | 1.12E-10 | 0.002131 |
| 13July2011 | 2369  | 419.56  | -6.17643 | 3 _LDTFSEK! chrX@3670   | 2.53E-10 | 0.006957 |
| 13July2011 | 13448 | 792.68  | -29.4394 | 4 R.PENK+14 chr4@2970   | 3.82E-10 | 0.006382 |
| 13July2011 | 2593  | 603.34  | 5.326143 | 2 _KNCISWV chr3@1194    | 4.26E-10 | 0.009241 |
| 13July2011 | 10380 | 716.06  | 22.87637 | 3 R.GK+14.0! chr2@7407  | 9.86E-11 | 0.004529 |
| 13July2011 | 7657  | 580.34  | -16.6457 | 3 _FLKNLKN chr3@1330    | 6.11E-11 | 0.001034 |
| 13July2011 | 6407  | 580.34  | -16.6457 | 3 _FLKNLKN chr3@1330    | 3.25E-10 | 0.009087 |
| 13July2011 | 9517  | 713.86  | 10.5315  | 2 V.VLIVMEV chr1@4831   | 2.67E-10 | 0.005293 |
| 13July2011 | 456   | 559.31  | -18.5845 | 2 K.KDEGEKK chr4@6476   | 2.68E-10 | 0.005277 |
| 13July2011 | 6922  | 412.57  | -22.739  | 3 R.IGKFTKN! Splice@chr | 2.91E-10 | 0.008033 |
| 13July2011 | 5928  | 412.57  | -22.739  | 3 R.IGKFTKN! Splice@chr | 3.82E-10 | 0.006606 |
| 13July2011 | 10190 | 621.02  | -19.8192 | 3 R.NAK+14.1 Splice@chr | 3.56E-10 | 0.008379 |
| 13July2011 | 6521  | 553.3   | -0.55256 | 2 R.IICETTQ! Splice@chr | 1.42E-10 | 0.005631 |
| 13July2011 | 6229  | 432.89  | -29.557  | 3 K.MSNYK+! chr3@3440   | 7.19E-11 | 0.005541 |
| 13July2011 | 208   | 607.81  | -16.5962 | 2 _FQNLSPF Splice@chr   | 4.85E-11 | 0.001603 |
| 13July2011 | 9630  | 516.3   | 12.68368 | 3 R.IAQFNET chr1@7525   | 3.16E-11 | 0.001258 |
| 13July2011 | 4255  | 575.32  | 13.13851 | 2 K.EWLISTM Splice@chr  | 3.52E-11 | 7.74E-04 |
| 13July2011 | 9821  | 555.3   | -5.01275 | 2 R.TIFWTVV chrX@1594   | 2.44E-10 | 0.005832 |
| 13July2011 | 12623 | 960.14  | -19.5146 | 3 K.KYFSSAIY chr5@3932  | 6.67E-11 | 0.001808 |
| 13July2011 | 8872  | 561.65  | 17.34636 | 3 K.KNLYTTQ chr3@9664   | 7.81E-11 | 0.002199 |
| 13July2011 | 1381  | 461.6   | 11.57307 | 3 _IQEFLGD! Splice@chr  | 1.46E-10 | 0.005279 |
| 13July2011 | 2917  | 640.82  | -10.398  | 2 R.CKM+15. chr2@1045   | 1.56E-10 | 0.003936 |
| 13July2011 | 8677  | 520.55  | 17.97457 | 4 _LLSIHNSV chr4@1114   | 2.83E-10 | 0.003914 |
| 13July2011 | 12866 | 626.09  | -24.215  | 4 K.PAGNMR chr1@1452    | 2.39E-10 | 0.005801 |
| 13July2011 | 14820 | 1127.88 | -15.0791 | 3 K.ENK+14.1 chr5@3406  | 3.37E-10 | 0.009225 |
| 13July2011 | 6440  | 587.35  | -27.7925 | 2 K.ILFLEALIN chr4@9365 | 4.85E-10 | 0.009331 |
| 13July2011 | 340   | 423.22  | -20.6214 | 2 R.RDVMPA chr4@1140    | 3.57E-10 | 0.008818 |
| 13July2011 | 8926  | 646.65  | 1.861245 | 3 _YFSTNFN chr3@1288    | 4.40E-11 | 4.23E-04 |
| 13July2011 | 9644  | 525.57  | -3.69499 | 4 R.VQKPFEK chr2@5302   | 2.57E-12 | 0        |
| 13July2011 | 9421  | 663.38  | -11.1103 | 2 K.RKHVAIV chr5@2067   | 2.05E-11 | 5.56E-04 |
| 13July2011 | 14611 | 662.88  | 8.39172  | 2 K.KK+14.01 chr4@1680  | 5.01E-10 | 0.008352 |
| 13July2011 | 17765 | 865.46  | 12.17338 | 3 K.LLSPK+14 Splice@chr | 1.02E-10 | 0.001225 |
| 13July2011 | 2125  | 439.74  | 26.88351 | 2 R.LASTTCPI Splice@chr | 2.24E-10 | 0.008572 |
| 13July2011 | 7896  | 611.82  | -10.3488 | 2 R.ACTITPFC chr5@5859  | 6.07E-10 | 0.008707 |
| 13July2011 | 7447  | 611.82  | -10.3488 | 2 R.ACTITPFC chr5@5859  | 2.65E-10 | 0.007548 |
| 13July2011 | 6561  | 606.31  | -1.17587 | 3 K.QFIYISTS! chr5@8397 | 2.66E-10 | 0.006911 |
| 13July2011 | 8641  | 720.9   | -22.7215 | 2 R.SRILM+1! Splice@chr | 2.76E-10 | 0.008156 |
| 13July2011 | 6851  | 724.35  | 24.1171  | 3 R.DRVHCNI chrX@1265   | 2.98E-10 | 0.004912 |
| 13July2011 | 6831  | 724.35  | 24.1171  | 3 R.DRVHCNI chrX@1265   | 2.71E-10 | 0.007152 |
| 13July2011 | 13530 | 934.16  | 0.08721  | 3 K.LNILLDAF chr1@2327  | 1.45E-10 | 0.002355 |

|            |       |        |          |                         |          |          |
|------------|-------|--------|----------|-------------------------|----------|----------|
| 13July2011 | 18166 | 846.45 | -10.1069 | 1 R.PSPAYRR chr3@1081   | 1.10E-10 | 0.001846 |
| 13July2011 | 486   | 461.23 | 10.84027 | 3 K.PPQHFAI chr1@1130   | 3.41E-11 | 9.25E-04 |
| 13July2011 | 7306  | 469.57 | -0.4342  | 3 K.ENILMLS chr2@8605   | 2.99E-10 | 0.005627 |
| 13July2011 | 8957  | 469.57 | -0.4342  | 3 K.ENILMLS chr2@8605   | 8.15E-11 | 0.002063 |
| 13July2011 | 18266 | 799.16 | 6.652985 | 4 R.MDLQVL Splice@chr   | 2.83E-10 | 0.004811 |
| 13July2011 | 4971  | 573.34 | -11.0604 | 3 R.MSLRDGI Splice@chr  | 4.39E-11 | 0.002082 |
| 13July2011 | 11574 | 613.36 | 2.724411 | 3 S.FSPLWIHI chr3@1340  | 3.31E-10 | 0.008266 |
| 13July2011 | 3497  | 620.09 | 8.47879  | 4 K.VDKNCG chr2@9995    | 1.07E-10 | 0.003708 |
| 13July2011 | 8403  | 623.59 | 10.91183 | 4 K.KGGGNLI chr5@3624   | 1.33E-10 | 0.001575 |
| 13July2011 | 16316 | 846.45 | -25.6058 | 2 R.FNILILIAF chr1@5221 | 4.23E-10 | 0.008664 |
| 13July2011 | 12340 | 797.89 | 26.40476 | 2 R.MFYDMK chr5@1967    | 8.94E-11 | 0.004116 |
| 13July2011 | 19221 | 426.2  | 22.85402 | 2 R.HNSSDYK Splice@chr  | 4.97E-10 | 0.007737 |
| 13July2011 | 13704 | 854.77 | -13.5158 | 3 K.ERKEMTK chr4@7149   | 3.37E-10 | 0.00559  |
| 13July2011 | 18221 | 774.41 | 10.89077 | 4 R.M+15.99 chr4@9664   | 4.22E-10 | 0.00683  |
| 13July2011 | 9297  | 506.61 | -19.8778 | 3 K.PSNKM+ chr2@7085    | 2.07E-10 | 0.003918 |
| 13July2011 | 14099 | 606.83 | 8.996418 | 4 R.VM+15.9 Splice@chr  | 6.11E-10 | 0.009293 |
| 13July2011 | 9687  | 667.68 | 25.75728 | 3 K.LTVQCM chr5@3636    | 4.47E-10 | 0.007859 |
| 13July2011 | 7868  | 667.68 | 25.75728 | 3 K.LTVQCM chr5@3636    | 2.85E-10 | 0.006504 |
| 13July2011 | 18868 | 712.89 | -22.091  | 2 K.HWK+14. Splice@chr  | 3.57E-10 | 0.005484 |
| 13July2011 | 12331 | 552.67 | 7.375964 | 3 I.GLGLGIGI chr2@1421  | 1.72E-10 | 0.002572 |
| 13July2011 | 9020  | 817.4  | 4.261455 | 4 _YCRRYAR Splice@chr   | 2.25E-11 | 2.70E-04 |
| 13July2011 | 18538 | 700.58 | -29.0348 | 5 _KSSKNRA chr4@1709    | 3.30E-11 | 6.55E-04 |
| 13July2011 | 12425 | 934.16 | 6.453582 | 3 K.IVKECRFC chr1@1785  | 5.37E-11 | 0.001988 |
| 13July2011 | 15798 | 748.71 | -9.44508 | 3 K.TENWKK chr1@5085    | 5.42E-10 | 0.00991  |
| 13July2011 | 18700 | 774.14 | 2.310599 | 4 R.QFLVK+1 chr3@1191   | 2.92E-10 | 0.005554 |
| 13July2011 | 15794 | 966.17 | 7.781801 | 3 K.PRETSIG chr3@1225   | 2.70E-10 | 0.009448 |
| 13July2011 | 1848  | 606.31 | 16.87321 | 3 T.CLDTPSR chr5@6745   | 3.08E-10 | 0.006903 |
| 13July2011 | 2262  | 606.31 | 16.87321 | 3 T.CLDTPSR chr5@6745   | 1.05E-10 | 0.002307 |
| 13July2011 | 2066  | 606.31 | 16.87321 | 3 T.CLDTPSR chr5@6745   | 1.09E-10 | 0.004553 |
| 13July2011 | 16464 | 724.73 | 21.47779 | 3 R.IKAFTKYA Splice@chr | 1.42E-10 | 0.002278 |
| 13July2011 | 6400  | 534.31 | -19.9135 | 3 K.RIPLAETS Splice@chr | 4.65E-11 | 0.002049 |
| 13July2011 | 8804  | 978.85 | -14.9801 | 3 _KYVMYH chr2@3144     | 3.63E-10 | 0.008085 |
| 13July2011 | 11114 | 606.86 | -5.29157 | 2 K.IILALFEH Splice@chr | 9.52E-11 | 0.00116  |
| 13July2011 | 3127  | 571.36 | 17.45493 | 3 R.LQFAKFLI chr2@1246  | 1.13E-10 | 0.003564 |
| 13July2011 | 10785 | 791.14 | -28.0287 | 4 R.IK+14.01 chr1@1191  | 2.10E-10 | 0.006008 |
| 13July2011 | 14040 | 814.77 | 5.100276 | 3 K.SYWNLLN Splice@chr  | 2.02E-11 | 0.001085 |
| 13July2011 | 10081 | 621.3  | -17.9336 | 1 K.MGGVEK chr3@4621    | 5.75E-10 | 0.009007 |
| 13July2011 | 17873 | 938.16 | 1.325514 | 3 _GGKKKDE chr5@4211    | 2.11E-10 | 0.004544 |
| 13July2011 | 11524 | 675.36 | -25.704  | 2 E.ELPELGFI chr1@1059  | 4.22E-10 | 0.009405 |
| 13July2011 | 14783 | 884.42 | 9.515924 | 3 R.YRVDLA chr5@6435    | 3.62E-13 | 0        |
| 13July2011 | 14367 | 884.42 | 9.515924 | 3 R.YRVDLA chr5@6435    | 1.21E-10 | 0.001317 |
| 13July2011 | 16680 | 884.42 | 9.515924 | 3 R.YRVDLA chr5@6435    | 1.39E-10 | 0.002688 |
| 13July2011 | 17012 | 884.42 | 9.515924 | 3 R.YRVDLA chr5@6435    | 3.67E-11 | 8.06E-04 |
| 13July2011 | 17281 | 884.42 | 9.515924 | 3 R.YRVDLA chr5@6435    | 2.81E-10 | 0.004499 |
| 13July2011 | 12770 | 627.68 | -23.2883 | 3 R.IIK+14.01 chr5@9496 | 3.25E-10 | 0.007104 |
| 13July2011 | 13081 | 589.59 | 22.4358  | 4 K.RKIGYLSA chrX@2641  | 4.04E-10 | 0.006282 |
| 13July2011 | 4407  | 622.81 | -9.12865 | 2 K.NGRNLAI chr1@1467   | 1.83E-10 | 0.007003 |

|            |       |        |          |                         |          |          |
|------------|-------|--------|----------|-------------------------|----------|----------|
| 13July2011 | 9527  | 609.65 | -15.5099 | 3 K.NPYSFVV chr1@2397   | 1.93E-10 | 0.005917 |
| 13July2011 | 4975  | 677.34 | -22.5606 | 2 K.QKSNWH chr5@1229    | 4.91E-10 | 0.009313 |
| 13July2011 | 12859 | 813.42 | 21.93795 | 4 K.RSQLSM+ chrX@3111   | 4.47E-11 | 0.001524 |
| 13July2011 | 1907  | 476.33 | 5.714188 | 2 K.KVHK+14 chr2@1075   | 1.95E-11 | 9.65E-04 |
| 13July2011 | 6333  | 457.26 | -25.746  | 3 R.IKVQISHL chr4@1128  | 1.47E-10 | 0.003548 |
| 13July2011 | 9232  | 902.1  | -17.1421 | 3 R.TGLNLDC chrX@1575   | 4.18E-10 | 0.008823 |
| 13July2011 | 12623 | 696.34 | 1.95455  | 4 R.ARGALPP chr1@4780   | 6.35E-11 | 0.001117 |
| 13July2011 | 397   | 482.73 | -8.10886 | 2 K.RNGSYPL chr5@1703   | 6.27E-10 | 0.009486 |
| 13July2011 | 15713 | 810.92 | -10.9271 | 2 Q.KYDNIKN Splice@chr  | 4.60E-10 | 0.008115 |
| 13July2011 | 343   | 655.82 | 18.0831  | 2 K.QCSIMAC chr2@8263   | 6.32E-12 | 0        |
| 13July2011 | 10785 | 692.38 | -1.80952 | 2 R.KFAFFFTf chr1@1181  | 3.64E-10 | 0.008085 |
| 13July2011 | 12342 | 692.38 | -1.80952 | 2 R.KFAFFFTf chr1@1181  | 2.62E-10 | 0.004214 |
| 13July2011 | 9239  | 691.88 | 0.618416 | 2 R.KFAFFFTf chr1@1181  | 2.68E-10 | 0.007809 |
| 13July2011 | 9192  | 691.87 | -13.8702 | 2 R.KFAFFFTf chr1@1181  | 1.80E-10 | 0.006236 |
| 13July2011 | 9135  | 691.88 | 0.618416 | 2 R.KFAFFFTf chr1@1181  | 2.56E-10 | 0.005772 |
| 13July2011 | 9088  | 692.38 | -1.80952 | 2 R.KFAFFFTf chr1@1181  | 3.46E-10 | 0.008911 |
| 13July2011 | 9460  | 691.87 | -13.8702 | 2 R.KFAFFFTf chr1@1181  | 2.42E-10 | 0.006545 |
| 13July2011 | 4355  | 418.23 | -0.36572 | 2 K.SLVTSNNI Splice@chr | 2.68E-10 | 0.004811 |
| 13July2011 | 2608  | 563.3  | -22.8429 | 3 K.NRFFQKS chr1@2490   | 2.48E-10 | 0.004408 |
| 13July2011 | 6819  | 624.32 | -7.93462 | 3 K.SFSSSEGL chr2@1127  | 6.69E-11 | 0.002241 |
| 13July2011 | 12820 | 793.36 | -28.4345 | 3 K.QNPIHTT chr1@7516   | 1.76E-10 | 0.006252 |
| 13July2011 | 19216 | 627.55 | -17.9242 | 4 K.VFLSFSSP chr5@1341  | 5.24E-11 | 0.001564 |
| 13July2011 | 16151 | 627.55 | -17.9242 | 4 K.VFLSFSSP chr5@1341  | 9.45E-11 | 0.001728 |
| 13July2011 | 18076 | 686.38 | -6.12389 | 4 _..NIKQATE chr3@1149  | 3.13E-10 | 0.00583  |
| 13July2011 | 17883 | 959.01 | 13.99318 | 2 R.SSLPAYGI chr1@1055  | 1.53E-10 | 0.003325 |
| 13July2011 | 1724  | 510.27 | -7.59045 | 3 K.CYSRANL chrX@6762   | 2.46E-10 | 0.004814 |
| 13July2011 | 9665  | 578.81 | 28.62745 | 2 _..YIFRDWE Splice@chr | 1.05E-10 | 0.006874 |
| 13July2011 | 1671  | 560.31 | -17.31   | 2 R.TRSTNEIk chr1@7924  | 1.40E-10 | 0.005523 |
| 13July2011 | 5442  | 486.61 | 24.13299 | 3 K.NLENSGK chr3@3066   | 1.69E-10 | 0.006842 |
| 13July2011 | 11711 | 722.05 | -13.5206 | 3 R.K+14.016 chr5@1648  | 2.71E-10 | 0.007809 |
| 13July2011 | 16266 | 805.65 | -4.93047 | 4 _..DNMLEV: Splice@chr | 4.23E-10 | 0.007856 |
| 13July2011 | 2246  | 419.56 | 5.444144 | 3 K.IDCHGAK chr1@1362   | 2.87E-10 | 0.004499 |
| 13July2011 | 5197  | 595.35 | 9.611866 | 2 _..VLCK+14. chr1@1406 | 5.51E-11 | 0.00274  |
| 13July2011 | 9811  | 428.27 | -12.0946 | 3 R.LLTTRVLE chr5@3385  | 2.59E-10 | 0.00411  |
| 13July2011 | 5206  | 518.76 | -26.6237 | 4 R.RRNGSVk chr4@7102   | 3.82E-10 | 0.009355 |
| 13July2011 | 4807  | 518.76 | -26.6237 | 4 R.RRNGSVk chr4@7102   | 5.16E-10 | 0.008459 |
| 13July2011 | 1098  | 402.22 | 21.37428 | 2 R.IADELDK. Splice@chr | 3.93E-10 | 0.009956 |
| 13July2011 | 14126 | 611.85 | -17.1859 | 4 K.TRK+14.C Splice@chr | 2.13E-10 | 0.005707 |
| 13July2011 | 6140  | 440.23 | -23.0671 | 3 _..FIGSSSA Splice@chr | 4.42E-10 | 0.006417 |
| 13July2011 | 7339  | 997.55 | -0.48998 | 1 K.KAQKMT chr5@6757    | 1.67E-10 | 0.006089 |
| 13July2011 | 6953  | 997.55 | -0.48998 | 1 K.KAQKMT chr5@6757    | 2.16E-10 | 0.008658 |
| 13July2011 | 17640 | 574.29 | -26.8787 | 3 K.KRPNFSF. chrX@4130  | 2.47E-10 | 0.004031 |
| 13July2011 | 3439  | 434.73 | 19.77212 | 2 K.FTKACNK chrX@1630   | 5.54E-10 | 0.008788 |
| 13July2011 | 13105 | 637.39 | -12.7558 | 2 R.FILNISVIN chr3@3953 | 9.10E-11 | 0.00358  |
| 13July2011 | 13251 | 637.4  | 2.973159 | 2 R.FILNISVIN chr3@3953 | 7.11E-11 | 0.003123 |
| 13July2011 | 8205  | 686.72 | 15.19125 | 3 R.SSK+14.0 Splice@chr | 5.62E-10 | 0.009191 |
| 13July2011 | 1025  | 467.74 | -1.24233 | 2 K.SLELSEEK chr1@1462  | 3.70E-10 | 0.008669 |

|            |       |         |          |                           |          |          |
|------------|-------|---------|----------|---------------------------|----------|----------|
| 13July2011 | 6092  | 536.26  | -19.3848 | 4 K.NEQFVM chrX@8845      | 4.10E-10 | 0.006625 |
| 13July2011 | 11087 | 1141.59 | -15.6045 | 2 R.TKKSTLA` Splice@chr   | 1.30E-10 | 0.004645 |
| 13July2011 | 7765  | 607.34  | -5.60545 | 3 K.KDQKM+ chr4@5397      | 2.22E-10 | 0.00524  |
| 13July2011 | 16804 | 775.42  | -25.1711 | 1 R.VQTAEVh chr3@1366     | 2.76E-10 | 0.004499 |
| 13July2011 | 13085 | 641.01  | -9.8545  | 3 R.EAISSSTK chr1@3371    | 1.64E-10 | 0.004034 |
| 13July2011 | 11623 | 588.33  | -11.0751 | 2 K.M+15.99 chr5@1328     | 3.44E-10 | 0.007684 |
| 13July2011 | 16084 | 1058.89 | -15.9237 | 3 K.FFNEK+1. chr1@4629    | 3.47E-10 | 0.009622 |
| 13July2011 | 17133 | 535.56  | 16.44219 | 4 R.TVFDK+1 chr3@1185     | 5.81E-10 | 0.008811 |
| 13July2011 | 7207  | 522.95  | -1.09143 | 3 _FIVFFSQF chr3@2835     | 1.89E-10 | 0.00551  |
| 13July2011 | 2914  | 424.25  | 11.30709 | 3 K.KDAQAVi chr2@3864     | 3.37E-10 | 0.007376 |
| 13July2011 | 2906  | 424.25  | 11.30709 | 3 K.KDAQAVi chr2@3864     | 2.45E-10 | 0.006871 |
| 13July2011 | 12375 | 565.31  | -5.71084 | 5 K.SLGIIISTPI Splice@chr | 4.73E-10 | 0.008571 |
| 13July2011 | 14064 | 829.69  | -22.6725 | 4 R.LKSEIYSIF chr1@1389   | 2.64E-10 | 0.005173 |
| 13July2011 | 6254  | 656.81  | -21.3125 | 2 _FEDFVHF chrX@2151      | 3.10E-10 | 0.006816 |
| 13July2011 | 10096 | 831.43  | -25.871  | 2 K.PQLAGKF chr1@3239     | 4.15E-10 | 0.0065   |
| 13July2011 | 11579 | 797.16  | -8.50948 | 4 R.FLKLCSTC chrX@2682    | 1.29E-10 | 0.004734 |
| 13July2011 | 1797  | 597.32  | -6.70801 | 2 R.RCLAMM Splice@chr     | 3.18E-10 | 0.006826 |
| 13July2011 | 1852  | 597.31  | -23.5081 | 2 R.RCLAMM Splice@chr     | 6.44E-11 | 0.001462 |
| 13July2011 | 1682  | 597.31  | -23.5081 | 2 R.RCLAMM Splice@chr     | 7.69E-12 | 0        |
| 13July2011 | 1770  | 597.32  | -6.70801 | 2 R.RCLAMM Splice@chr     | 2.50E-10 | 0.007343 |
| 13July2011 | 14709 | 585.85  | -3.13084 | 2 K.K+14.016 chrX@2372    | 3.70E-10 | 0.009141 |
| 13July2011 | 2264  | 608.29  | 8.442528 | 2 K.RFNNEHh chrX@6725     | 3.13E-10 | 0.005718 |
| 13July2011 | 2759  | 608.29  | 8.442528 | 2 K.RFNNEHh chrX@6725     | 3.02E-10 | 0.005627 |
| 13July2011 | 2984  | 608.79  | 5.680371 | 2 K.RFNNEHh chrX@6725     | 1.00E-11 | 1.30E-04 |
| 13July2011 | 3145  | 608.79  | 5.680371 | 2 K.RFNNEHh chrX@6725     | 1.54E-10 | 0.003981 |
| 13July2011 | 611   | 520.61  | -12.6078 | 3 R.IPHSM+1 chr5@8324     | 3.71E-10 | 0.008655 |
| 13July2011 | 7744  | 629.06  | -27.0158 | 4 K.RNEIKVEI chr2@7178    | 1.65E-10 | 0.006375 |
| 13July2011 | 12432 | 824.97  | -0.37038 | 2 R.NLNFPPK chr3@1199     | 5.64E-12 | 1.98E-04 |
| 13July2011 | 7658  | 690.38  | 19.53863 | 2 K.FLASTEK1 Splice@chr   | 4.85E-10 | 0.007411 |
| 13July2011 | 6367  | 762.42  | 20.36117 | 2 R.QNFLSGN chr3@1144     | 2.37E-10 | 0.006584 |
| 13July2011 | 6200  | 440.24  | 13.61814 | 3 Q.M+15.99 Splice@chr    | 4.52E-10 | 0.006517 |
| 13July2011 | 6389  | 799.4   | -2.17878 | 2 _NYM+15. Splice@chr     | 4.36E-10 | 0.00796  |
| 13July2011 | 15969 | 996.81  | -25.4844 | 3 K.IEIFM+15 chr4@1491    | 2.43E-10 | 0.006183 |
| 13July2011 | 16083 | 996.81  | -25.4844 | 3 K.IEIFM+15 chr4@1491    | 2.98E-11 | 5.62E-04 |
| 13July2011 | 15671 | 996.81  | -25.4844 | 3 K.IEIFM+15 chr4@1491    | 2.51E-10 | 0.006957 |
| 13July2011 | 14723 | 996.81  | -25.4844 | 3 K.IEIFM+15 chr4@1491    | 3.79E-10 | 0.007735 |
| 13July2011 | 13307 | 996.81  | -25.4844 | 3 K.IEIFM+15 chr4@1491    | 2.83E-10 | 0.006227 |
| 13July2011 | 4513  | 601.79  | -1.62548 | 2 K.YGATRFS chrX@6172     | 2.26E-10 | 0.008535 |
| 13July2011 | 6887  | 758.38  | -28.9303 | 2 K.NIQK+14 chr3@4556     | 1.54E-10 | 0.003732 |
| 13July2011 | 17685 | 634.32  | -15.8694 | 3 _FERSNNII chr4@1114     | 7.97E-11 | 0.002094 |
| 13July2011 | 7630  | 503.3   | 20.55883 | 2 R.GKFAFLH Splice@chr    | 3.37E-10 | 0.008438 |
| 13July2011 | 10470 | 887.78  | -15.124  | 3 K.LSSPEME chr1@2558     | 2.96E-10 | 0.008469 |
| 13July2011 | 14727 | 593.34  | 22.02044 | 2 R.NSHTLPL chrX@9076     | 1.63E-10 | 0.003323 |
| 13July2011 | 9285  | 669.86  | -3.65013 | 2 L.QNK+14.( chr5@4895    | 2.72E-10 | 0.007809 |
| 13July2011 | 8237  | 669.86  | -3.65013 | 2 L.QNK+14.( chr5@4895    | 8.44E-11 | 0.00614  |
| 13July2011 | 15171 | 851.77  | -15.0177 | 3 R.DCGMMI chr4@7178      | 4.70E-10 | 0.009462 |
| 13July2011 | 15320 | 746.38  | -1.20099 | 3 K.IDDFNSIK Splice@chr   | 1.04E-10 | 0.002186 |

|            |       |         |          |                          |          |          |
|------------|-------|---------|----------|--------------------------|----------|----------|
| 13July2011 | 305   | 417.85  | -18.937  | 3 K.WECNST chr2@1065     | 1.57E-10 | 0.003323 |
| 13July2011 | 1425  | 521.3   | 12.97743 | 2 R.AQKHWF chr5@1024     | 2.37E-10 | 0.007025 |
| 13July2011 | 6971  | 549.33  | 27.35497 | 2 _KFSAKKM chr3@2575     | 1.01E-10 | 0.003815 |
| 13July2011 | 11664 | 657.84  | -16.2435 | 4 _KTGLYFS chrX@4582     | 2.44E-10 | 0.003813 |
| 13July2011 | 12910 | 709.63  | 25.32349 | 4 K.FQFRQLA chr2@1309    | 2.60E-10 | 0.005926 |
| 13July2011 | 9046  | 582.31  | -16.6153 | 5 R.RNVKNT chr1@1016     | 3.76E-10 | 0.006541 |
| 13July2011 | 17461 | 941.15  | 14.91652 | 3 R.AVLVFIF Splice@chr   | 3.17E-10 | 0.007117 |
| 13July2011 | 11279 | 675.34  | 0.543072 | 2 R.QSLYFQD chr5@2555    | 1.33E-10 | 0.003934 |
| 13July2011 | 8667  | 628.83  | -4.15683 | 4 K.MIAK+14 chr4@7315    | 3.45E-10 | 0.00952  |
| 13July2011 | 18012 | 931.49  | -10.9543 | 2 G.ESSRFLT chr2@4815    | 1.22E-10 | 0.002451 |
| 13July2011 | 17943 | 931.99  | -12.757  | 2 G.ESSRFLT chr2@4815    | 3.83E-10 | 0.007551 |
| 13July2011 | 18947 | 931.99  | -12.757  | 2 G.ESSRFLT chr2@4815    | 2.94E-11 | 6.78E-04 |
| 13July2011 | 18799 | 1001.86 | 10.57053 | 3 R.RCKADPK chr4@1697    | 5.05E-10 | 0.007944 |
| 13July2011 | 16402 | 937.14  | 5.762127 | 3 K.DYFGSIF chr1@1215    | 2.36E-10 | 0.003931 |
| 13July2011 | 17177 | 671.67  | -3.57961 | 3 R.FSWNIS chr2@6685     | 1.04E-10 | 0.001962 |
| 13July2011 | 12534 | 708.36  | 4.864158 | 3 R.RQCHK+1 Splice@chr   | 5.56E-10 | 0.008788 |
| 13July2011 | 10409 | 693.62  | -2.20307 | 4 K.VDSGLAC chrX@1605    | 1.64E-10 | 0.004064 |
| 13July2011 | 86    | 573.81  | 0.319666 | 2 K.KEEK+14. chr5@1995   | 4.11E-10 | 0.007923 |
| 13July2011 | 120   | 573.81  | 0.319666 | 2 K.KEEK+14. chr5@1995   | 4.95E-10 | 0.008151 |
| 13July2011 | 10707 | 617.33  | -16.1748 | 3 R.VHSQAIV chr4@1368    | 2.23E-10 | 0.006173 |
| 13July2011 | 433   | 553.28  | 25.75099 | 2 _RSSNSGA chr1@2725     | 5.26E-11 | 0.001868 |
| 13July2011 | 496   | 553.28  | 25.75099 | 2 _RSSNSGA chr1@2725     | 2.58E-11 | 0.001929 |
| 13July2011 | 3799  | 407.56  | 12.11053 | 3 _ALQCQTK chr3@9135     | 1.78E-11 | 0.001126 |
| 13July2011 | 3006  | 407.56  | 12.11053 | 3 _ALQCQTK chr3@9135     | 3.05E-10 | 0.007386 |
| 13July2011 | 8258  | 791.89  | -5.13391 | 2 M.VVVEPEG chr4@6010    | 2.81E-10 | 0.006515 |
| 13July2011 | 4882  | 574.79  | 20.07121 | 2 R.LELWSCD Splice@chr   | 3.92E-10 | 0.006835 |
| 13July2011 | 12611 | 649.03  | 28.822   | 3 K.K+14.016 chr5@1978   | 5.54E-11 | 0.002416 |
| 13July2011 | 13979 | 580.33  | 6.170568 | 2 K.NVQKM+ chr1@1274     | 1.29E-10 | 0.003448 |
| 13July2011 | 5507  | 624.36  | 17.00384 | 2 R.PK+14.01 Splice@chr  | 6.27E-11 | 0.001808 |
| 13July2011 | 11830 | 541.31  | 3.614888 | 4 R.VLFKFQV chr1@1714    | 5.08E-10 | 0.008352 |
| 13July2011 | 10019 | 552.65  | 19.84231 | 3 R.LSDLHM chr1@5050     | 7.82E-11 | 0.002854 |
| 13July2011 | 10476 | 640.01  | -16.1493 | 3 R.IHIFQKIA chr4@1275   | 3.39E-10 | 0.008438 |
| 13July2011 | 9311  | 626.32  | -23.3935 | 2 R.M+15.99 Splice@chr   | 2.12E-10 | 0.009723 |
| 13July2011 | 15504 | 711.85  | -3.24171 | 4 K.IRTSWKK chrX@6614    | 2.55E-10 | 0.004248 |
| 13July2011 | 9431  | 614.35  | -6.82038 | 2 K.YFINGIIKI Splice@chr | 1.22E-10 | 0.005697 |
| 13July2011 | 10251 | 1140.55 | -2.75866 | 2 R.NCTFIKN chr2@1061    | 1.02E-11 | 3.58E-04 |
| 13July2011 | 10076 | 1140.55 | -2.75866 | 2 R.NCTFIKN chr2@1061    | 2.84E-11 | 3.68E-04 |
| 13July2011 | 9557  | 1140.55 | -2.75866 | 2 R.NCTFIKN chr2@1061    | 2.71E-11 | 0.001146 |
| 13July2011 | 16754 | 623.8   | 13.88044 | 2 R.M+15.99 chr4@7448    | 1.82E-10 | 0.005317 |
| 13July2011 | 10615 | 580.29  | -25.708  | 3 R.HEKGVSF chrX@1627    | 1.89E-10 | 0.005533 |
| 13July2011 | 12433 | 960.16  | -13.66   | 3 K.QTKELTSI chr2@6579   | 9.38E-11 | 0.003262 |
| 13July2011 | 8459  | 507.94  | 5.021459 | 3 K.SFSANNC chr2@1088    | 3.72E-10 | 0.008085 |
| 13July2011 | 11329 | 785.39  | 21.14157 | 2 R.RETHFGC chr1@1640    | 2.10E-10 | 0.006008 |
| 13July2011 | 10847 | 741.03  | 16.05587 | 3 R.QTAQNH chrX@1437     | 2.52E-10 | 0.005293 |
| 13July2011 | 12026 | 747.38  | 24.13621 | 3 _FLNFSTNI Splice@chr   | 1.11E-10 | 0.003134 |
| 13July2011 | 10194 | 740.74  | -20.0026 | 3 R.LRSPSSL Splice@chr   | 4.60E-10 | 0.009462 |
| 13July2011 | 8888  | 666.04  | -10.3137 | 3 K.VLNNLPV chr2@1014    | 8.81E-11 | 0.00614  |

|            |       |         |          |                        |          |          |
|------------|-------|---------|----------|------------------------|----------|----------|
| 13July2011 | 8183  | 479.77  | 26.26267 | 2 K.NNIAGNL chr4@5398  | 2.15E-10 | 0.003601 |
| 13July2011 | 3073  | 553.26  | -20.6044 | 3 K.PSEFEFP5 chr5@1935 | 4.93E-11 | 0.003165 |
| 13July2011 | 2000  | 487.78  | -24.0337 | 2 R.LIFEVGAF chrX@2256 | 7.51E-11 | 0.001226 |
| 13July2011 | 2522  | 487.78  | -24.0337 | 2 R.LIFEVGAF chrX@2256 | 5.56E-12 | 3.45E-04 |
| 13July2011 | 1825  | 487.78  | -24.0337 | 2 R.LIFEVGAF chrX@2256 | 1.74E-10 | 0.002575 |
| 13July2011 | 10007 | 706.03  | 26.31857 | 3 _FVVWYVI chr2@1496   | 5.30E-10 | 0.009605 |
| 13July2011 | 420   | 488.75  | -18.6452 | 2 K.FSEGPNV chr4@1065  | 8.15E-12 | 1.98E-04 |
| 13July2011 | 96    | 798.38  | -19.136  | 2 R.RK+14.01 chr2@3785 | 4.64E-10 | 0.008073 |
| 13July2011 | 9752  | 539.31  | 15.42054 | 3 R.RRFNYAC chr5@3298  | 1.25E-10 | 0.007855 |
| 13July2011 | 20521 | 705.38  | 16.29082 | 2 K.YCFLNIKF chrX@3390 | 2.51E-10 | 0.005293 |
| 13July2011 | 18329 | 800.47  | 6.107659 | 2 S.FIPAVAS1 chr4@4725 | 4.33E-10 | 0.006695 |
| 13July2011 | 3611  | 425.98  | -16.0577 | 4 K.AK+14.01 chr5@1568 | 3.83E-11 | 5.61E-04 |
| 13July2011 | 106   | 516.79  | -11.715  | 2 K.KVPREFEI chr4@1427 | 2.50E-10 | 0.00495  |
| 13July2011 | 13584 | 504.01  | 5.312445 | 4 K.HKSMAIY chrX@6820  | 1.55E-10 | 0.003323 |
| 13July2011 | 17596 | 996.52  | 7.030298 | 3 _K+14.016 chr1@3091  | 3.29E-10 | 0.0076   |
| 13July2011 | 10853 | 470.92  | -0.69273 | 3 K.LNDKKN1 chr3@6434  | 4.80E-10 | 0.009244 |
| 13July2011 | 13883 | 929.99  | -6.94914 | 4 R.YTM+15.1 chr4@1185 | 2.11E-10 | 0.003918 |
| 13July2011 | 4809  | 639.32  | 11.66573 | 2 R.DRRSCSP chr5@2072  | 1.23E-11 | 3.25E-04 |
| 13July2011 | 5366  | 588.29  | -10.2888 | 2 R.QIDKLEN chr5@2475  | 1.07E-10 | 0.001907 |
| 13July2011 | 4225  | 588.29  | -10.2888 | 2 R.QIDKLEN chr5@2475  | 1.09E-10 | 0.002352 |
| 13July2011 | 4447  | 588.29  | -10.2888 | 2 R.QIDKLEN chr5@2475  | 2.15E-11 | 6.00E-04 |
| 13July2011 | 2942  | 614.27  | 3.085296 | 2 R.KMSGCV1 chr5@8505  | 2.41E-10 | 0.003813 |
| 13July2011 | 15929 | 944.43  | -29.6119 | 2 _FNKVRM1 chr1@3028   | 4.30E-10 | 0.009418 |
| 13July2011 | 17116 | 756.38  | 0        | 3 K.CAK+14.0 chr1@1205 | 1.84E-10 | 0.002958 |
| 13July2011 | 17649 | 756.38  | 0        | 3 K.CAK+14.0 chr1@1205 | 4.49E-10 | 0.007819 |
| 13July2011 | 8616  | 679.42  | 22.76234 | 2 R.HHQRRLI chr5@1961  | 1.17E-10 | 0.004931 |
| 13July2011 | 11764 | 726.41  | 16.46246 | 2 K.IYFKNPK1 chr3@1194 | 2.42E-11 | 0.001262 |
| 13July2011 | 13336 | 788.92  | 8.853888 | 4 _QFPGK+1 Splice@chr  | 5.70E-11 | 0.001124 |
| 13July2011 | 2945  | 559.32  | 22.5206  | 3 R.SPREM+1 chr5@1464  | 2.72E-10 | 0.006109 |
| 13July2011 | 15865 | 1036.53 | 24.62712 | 3 R.TTFSHLQ chrX@1725  | 9.03E-11 | 0.002135 |
| 13July2011 | 8257  | 617.32  | 17.14344 | 3 _TNK+14.0 chr5@7358  | 4.24E-10 | 0.006823 |
| 13July2011 | 14415 | 895.8   | -0.72759 | 3 R.WLPGILC Splice@chr | 3.64E-10 | 0.006736 |
| 13July2011 | 1063  | 553.27  | -12.9305 | 2 R.WKSTQC chr1@5560   | 2.75E-10 | 0.008156 |
| 13July2011 | 3968  | 464.29  | 24.33623 | 2 R.PTAHLFLI chr4@5894 | 2.73E-10 | 0.00369  |
| 13July2011 | 4027  | 464.29  | 24.33623 | 2 R.PTAHLFLI chr4@5894 | 4.87E-10 | 0.007411 |
| 13July2011 | 14343 | 633.69  | -12.2194 | 3 K.LTDNVSG chr5@1917  | 2.02E-10 | 0.002476 |
| 13July2011 | 6645  | 498.27  | -19.8021 | 3 R.LKLAKM+ chr4@1162  | 1.55E-10 | 0.004761 |
| 13July2011 | 8376  | 795.64  | -2.30427 | 4 K.NEGEVIK chrX@5587  | 1.47E-10 | 0.002806 |
| 13July2011 | 641   | 557.31  | 28.52693 | 2 R.EKFVSNH Splice@chr | 1.64E-10 | 0.002262 |
| 13July2011 | 4761  | 574.29  | -24.806  | 2 R.RSGEKCA chr5@9685  | 2.44E-12 | 0        |
| 13July2011 | 17616 | 1120.09 | 10.2537  | 2 R.VFWDQN chr1@4126   | 8.72E-11 | 0.001353 |
| 13July2011 | 7180  | 572.84  | 2.775147 | 2 R.AK+14.01 chr2@1307 | 1.82E-11 | 0.001253 |
| 13July2011 | 13301 | 914.49  | 19.09522 | 3 R.KSEEK+1 Splice@chr | 1.61E-10 | 0.002093 |
| 13July2011 | 7980  | 511.77  | -6.84354 | 4 R.EYLRSVG Splice@chr | 6.57E-11 | 0.003535 |
| 13July2011 | 6212  | 443.26  | -12.6047 | 3 _SISRLSKP Splice@chr | 3.79E-10 | 0.007387 |
| 13July2011 | 43    | 476.26  | -5.99322 | 3 K.FQKISSSC chr4@1495 | 4.24E-10 | 0.009405 |
| 13July2011 | 2230  | 421.59  | 28.63796 | 3 R.VTGFLIPk chr3@1187 | 1.17E-11 | 1.56E-04 |

|            |       |         |          |                         |          |          |
|------------|-------|---------|----------|-------------------------|----------|----------|
| 13July2011 | 3066  | 421.59  | 28.63796 | 3 R.VTGFLIPk chr3@1187  | 1.61E-11 | 1.89E-04 |
| 13July2011 | 9390  | 573.34  | 8.318214 | 3 K.ISRMSSRI Splice@chr | 3.07E-10 | 0.006711 |
| 13July2011 | 7237  | 503.02  | 18.88632 | 4 K.PIFYSRN/ chr3@4801  | 3.37E-10 | 0.008669 |
| 13July2011 | 2414  | 498.78  | -6.86649 | 2 K.EKHDRIA chrX@1412   | 3.61E-10 | 0.007795 |
| 13July2011 | 3401  | 787.89  | 3.102642 | 2 K.ACK+14.C Splice@chr | 4.02E-10 | 0.008768 |
| 13July2011 | 921   | 508.6   | 0.721467 | 3 R.LHFCLLPs chr2@3274  | 3.47E-10 | 0.007246 |
| 13July2011 | 16758 | 482.3   | -18.9374 | 3 K.PIK+14.0 chr4@2195  | 4.99E-10 | 0.008868 |
| 13July2011 | 8843  | 552.28  | -28.5485 | 4 R.MKLVLI FI chr4@5662 | 4.41E-10 | 0.008922 |
| 13July2011 | 879   | 563.31  | 15.73929 | 2 R.ESISFSKV Splice@chr | 1.02E-11 | 5.61E-04 |
| 13July2011 | 16932 | 912.48  | 12.42986 | 2 R.TMLELIN Splice@chr  | 6.96E-18 | 0        |
| 13July2011 | 16977 | 912.47  | 1.441699 | 2 R.TMLELIN Splice@chr  | 4.34E-17 | 0        |
| 13July2011 | 3610  | 459.26  | -20.1781 | 2 K.DATGSILL chr4@1111  | 2.79E-10 | 0.007027 |
| 13July2011 | 1475  | 480.26  | -4.13902 | 2 R.EIVRDAEI chr1@1297  | 3.29E-10 | 0.008271 |
| 13July2011 | 9038  | 492.32  | -4.41011 | 2 R.ARIAAQL Splice@chr  | 4.69E-11 | 8.19E-04 |
| 13July2011 | 15757 | 1179.59 | -29.4737 | 3 K.KCTISKFC Splice@chr | 1.70E-10 | 0.00245  |
| 13July2011 | 8258  | 491.26  | -14.4415 | 4 K.WGASILE Splice@chr  | 9.17E-11 | 0.001227 |
| 13July2011 | 3580  | 686.36  | -3.29508 | 2 K.ELMRRSP Splice@chr  | 1.48E-10 | 0.004645 |
| 13July2011 | 13942 | 826.2   | -3.99408 | 4 K.SVFQLFH chr1@1465   | 2.18E-10 | 0.004673 |
| 13July2011 | 5287  | 479.77  | -4.14326 | 2 K.VIISGYIGI chr2@7565 | 3.89E-10 | 0.006863 |
| 13July2011 | 3388  | 424.87  | 19.26494 | 3 K.FMIQSGS chr2@7278   | 2.77E-11 | 7.82E-04 |
| 13July2011 | 15006 | 496.61  | 13.38286 | 3 K.NSHPHRS chr3@1752   | 2.11E-11 | 0.001145 |
| 13July2011 | 17748 | 724.41  | -0.84372 | 1 R.NGHVLGI chr3@2457   | 2.23E-10 | 0.00406  |
| 13July2011 | 6383  | 483.25  | -18.2651 | 4 N.TVFQVH chrX@5427    | 6.32E-10 | 0.009121 |
| 13July2011 | 6365  | 637.85  | 18.46583 | 2 R.SHFKLVN chr3@4920   | 4.78E-10 | 0.009614 |
| 13July2011 | 7898  | 637.85  | 18.46583 | 2 R.SHFKLVN chr3@4920   | 3.51E-10 | 0.006671 |
| 13July2011 | 6568  | 637.85  | 18.46583 | 2 R.SHFKLVN chr3@4920   | 4.57E-10 | 0.007624 |
| 13July2011 | 6509  | 637.85  | 18.46583 | 2 R.SHFKLVN chr3@4920   | 5.52E-10 | 0.008788 |
| 13July2011 | 5409  | 637.85  | 18.46583 | 2 R.SHFKLVN chr3@4920   | 1.63E-10 | 0.004653 |
| 13July2011 | 4631  | 637.85  | 18.46583 | 2 R.SHFKLVN chr3@4920   | 1.50E-10 | 0.008468 |
| 13July2011 | 5930  | 637.85  | 18.46583 | 2 R.SHFKLVN chr3@4920   | 4.32E-10 | 0.009241 |
| 13July2011 | 5754  | 637.84  | 2.831257 | 2 R.SHFKLVN chr3@4920   | 4.73E-10 | 0.008419 |
| 13July2011 | 6275  | 637.85  | 18.46583 | 2 R.SHFKLVN chr3@4920   | 4.10E-10 | 0.008664 |
| 13July2011 | 5232  | 637.85  | 18.46583 | 2 R.SHFKLVN chr3@4920   | 2.38E-10 | 0.006545 |
| 13July2011 | 6736  | 682.86  | 25.154   | 2 _ANMQAC chr1@5565     | 2.42E-11 | 1.89E-04 |
| 13July2011 | 7016  | 682.86  | 25.154   | 2 _ANMQAC chr1@5565     | 3.17E-10 | 0.007899 |
| 13July2011 | 9701  | 657.04  | 5.08604  | 3 R.TAAATRK Splice@chr  | 2.01E-10 | 0.00236  |
| 13July2011 | 12620 | 875.95  | -24.4151 | 2 _SCRLIFVN chr3@1231   | 1.13E-10 | 0.003897 |
| 13July2011 | 1128  | 574.32  | -7.6651  | 2 K.WGVGRG chr4@1447    | 2.68E-10 | 0.004383 |
| 13July2011 | 13981 | 571.33  | 19.6575  | 2 D.INIDKTDI Splice@chr | 6.45E-10 | 0.009865 |
| 13July2011 | 17340 | 705.38  | -6.5855  | 2 R.CYRILAIFI chr5@1905 | 2.35E-10 | 0.003878 |
| 13July2011 | 4175  | 486.61  | 8.630762 | 3 _NIK+14.0 chrX@9295   | 1.98E-10 | 0.004673 |
| 13July2011 | 4234  | 486.61  | 8.630762 | 3 _NIK+14.0 chrX@9295   | 2.94E-10 | 0.006533 |
| 13July2011 | 11609 | 957.8   | 19.76213 | 3 K.K+14.016 chrX@1354  | 1.05E-10 | 0.007252 |
| 13July2011 | 198   | 421.28  | 13.13123 | 3 K.KPILGAT\ chr3@1282  | 7.75E-11 | 0.00357  |
| 13July2011 | 2557  | 456.25  | -29.3809 | 3 K.KIMTTSKI chr5@1072  | 3.62E-10 | 0.009463 |
| 13July2011 | 14375 | 744.14  | -13.6338 | 4 K.NSQNSP\ chr4@2415   | 1.67E-10 | 0.004814 |
| 13July2011 | 1503  | 474.91  | -6.61132 | 3 K.WM+15.5 chr5@1991   | 2.46E-10 | 0.004936 |

|            |       |         |          |                         |          |          |
|------------|-------|---------|----------|-------------------------|----------|----------|
| 13July2011 | 12089 | 684.38  | -11.7894 | 4 _ .KIAKELG( chr2@7752 | 1.90E-10 | 0.007209 |
| 13July2011 | 15359 | 908.97  | -25.5903 | 2 M.VK+14.0 Splice@chr  | 5.28E-10 | 0.007961 |
| 13July2011 | 7217  | 617.32  | 10.89373 | 2 _ .KDSVEAE chr1@8384  | 2.21E-10 | 0.004673 |
| 13July2011 | 1312  | 591.28  | -10.0883 | 2 R.FEPCICG( Splice@chr | 1.04E-10 | 0.00301  |
| 13July2011 | 3746  | 498.77  | 1.413702 | 2 K.RSQSGIY( Splice@chr | 4.93E-11 | 0.003523 |
| 13July2011 | 17666 | 821.93  | -8.69882 | 4 R.WSSASR( chr1@1886   | 1.44E-11 | 2.94E-04 |
| 13July2011 | 15633 | 785.38  | -14.9401 | 3 _ .RM+15.9 Splice@chr | 3.44E-10 | 0.006285 |
| 13July2011 | 13787 | 591     | 16.45949 | 3 K.LREKTKT( chrX@1521  | 1.13E-10 | 0.00212  |
| 13July2011 | 8369  | 543.32  | -13.7304 | 2 _ .KIVFNShI chr5@1317 | 3.35E-10 | 0.008374 |
| 13July2011 | 3998  | 430.75  | -26.2529 | 4 R.QFHAVIS Splice@chr  | 3.64E-10 | 0.006541 |
| 13July2011 | 10685 | 888.16  | -26.7714 | 3 _ .GRVLRCY Splice@chr | 1.54E-10 | 0.00393  |
| 13July2011 | 7850  | 539.29  | -25.9308 | 2 K.SLMIWIM chr1@3770   | 5.12E-10 | 0.009052 |
| 13July2011 | 10862 | 594.32  | 6.40743  | 4 _ .LASPPKM chrX@7427  | 1.47E-10 | 0.002355 |
| 13July2011 | 18646 | 1063.23 | -0.22984 | 3 _ .RRARK+1 chr3@3461  | 5.72E-10 | 0.009505 |
| 13July2011 | 563   | 457.75  | -2.67262 | 2 K.ISGVAEPI chr5@1941  | 5.34E-10 | 0.00824  |
| 13July2011 | 4149  | 579.8   | 16.55634 | 2 _ .M+15.99 chr5@8621  | 2.62E-10 | 0.009371 |
| 13July2011 | 5687  | 746.86  | -1.71849 | 2 K.FQEK+14 chr3@1200   | 2.73E-10 | 0.004447 |
| 13July2011 | 5715  | 746.86  | -1.71849 | 2 K.FQEK+14 chr3@1200   | 1.38E-10 | 0.00426  |
| 13July2011 | 11195 | 686.37  | 10.56247 | 2 R.EFMSKSS chr5@1396   | 3.88E-10 | 0.009355 |
| 13July2011 | 10649 | 686.37  | 10.56247 | 2 R.EFMSKSS chr5@1396   | 1.30E-10 | 0.001966 |
| 13July2011 | 7544  | 686.37  | 10.56247 | 2 R.EFMSKSS chr5@1396   | 2.14E-11 | 0.00274  |
| 13July2011 | 8962  | 686.37  | 10.56247 | 2 R.EFMSKSS chr5@1396   | 2.58E-10 | 0.007584 |
| 13July2011 | 16551 | 775.42  | -0.15763 | 1 R.LDVSDVK Splice@chr  | 4.36E-10 | 0.007614 |
| 13July2011 | 15695 | 966.47  | 15.19977 | 3 R.TCLHM+1 chrX@2471   | 4.86E-10 | 0.009716 |
| 13July2011 | 7768  | 456.25  | -28.6906 | 3 K.EKYK+14. chr4@2866  | 3.54E-10 | 0.008105 |
| 13July2011 | 9881  | 573.29  | -26.3566 | 3 K.LPHKYNS Splice@chr  | 4.01E-10 | 0.008734 |
| 13July2011 | 8717  | 573.29  | -26.3566 | 3 K.LPHKYNS Splice@chr  | 4.29E-10 | 0.009242 |
| 13July2011 | 10860 | 568.54  | -10.4085 | 4 L.WQTVGT Splice@chr   | 6.47E-11 | 0.002135 |
| 13July2011 | 10355 | 498.81  | -8.45997 | 2 K.IPVNQKIC chr3@6592  | 1.52E-10 | 0.003416 |
| 13July2011 | 9440  | 498.81  | -8.45997 | 2 K.IPVNQKIC chr3@6592  | 3.81E-10 | 0.008194 |
| 13July2011 | 9763  | 498.81  | -8.45997 | 2 K.IPVNQKIC chr3@6592  | 2.99E-10 | 0.008178 |
| 13July2011 | 9736  | 498.81  | -8.45997 | 2 K.IPVNQKIC chr3@6592  | 2.74E-10 | 0.00959  |
| 13July2011 | 9126  | 498.81  | -8.45997 | 2 K.IPVNQKIC chr3@6592  | 1.96E-10 | 0.004673 |
| 13July2011 | 9402  | 498.81  | -8.45997 | 2 K.IPVNQKIC chr3@6592  | 1.22E-10 | 0.004556 |
| 13July2011 | 9352  | 498.81  | -8.45997 | 2 K.IPVNQKIC chr3@6592  | 1.89E-10 | 0.00777  |
| 13July2011 | 2278  | 409.22  | 0.149518 | 2 _ .EGLHHPK Splice@chr | 4.02E-10 | 0.006282 |
| 13July2011 | 2834  | 409.22  | 0.149518 | 2 _ .EGLHHPK Splice@chr | 6.01E-10 | 0.009809 |
| 13July2011 | 2720  | 409.22  | 0.149518 | 2 _ .EGLHHPK Splice@chr | 2.52E-10 | 0.004009 |
| 13July2011 | 2777  | 409.22  | 0.149518 | 2 _ .EGLHHPK Splice@chr | 2.05E-10 | 0.003327 |
| 13July2011 | 3389  | 473.25  | -1.87406 | 2 K.MGGINN chr2@8040    | 2.98E-10 | 0.005554 |
| 13July2011 | 2800  | 495.25  | 27.23082 | 2 R.DDVK+14 chrX@1018   | 4.86E-11 | 9.13E-04 |
| 13July2011 | 2585  | 495.25  | 27.23082 | 2 R.DDVK+14 chrX@1018   | 2.96E-11 | 0.001117 |
| 13July2011 | 7228  | 680.35  | -20.9333 | 4 _ .LQGDGQ Splice@chr  | 3.72E-10 | 0.009639 |
| 13July2011 | 6722  | 455.26  | 15.15933 | 4 K.K+14.016 chr5@1676  | 2.46E-10 | 0.007664 |
| 13July2011 | 2618  | 409.73  | 7.659319 | 4 _ .K+14.016 chr1@7559 | 1.78E-10 | 0.002137 |
| 13July2011 | 15102 | 585.85  | 6.366108 | 2 K.NDVVLN( chr2@1876   | 5.89E-10 | 0.008504 |
| 13July2011 | 12234 | 578.97  | 4.967528 | 3 K.NYSTPSN chr4@1282   | 2.13E-10 | 0.00524  |

|            |       |        |          |                         |          |          |
|------------|-------|--------|----------|-------------------------|----------|----------|
| 13July2011 | 18675 | 902.46 | -0.23592 | 2 _..ICRKSMN chr5@1495  | 2.79E-10 | 0.00472  |
| 13July2011 | 10770 | 667.37 | -25.6458 | 2 R.SSARSTR' chr5@1181  | 4.46E-10 | 0.008759 |
| 13July2011 | 9332  | 667.37 | -25.6458 | 2 R.SSARSTR' chr5@1181  | 5.28E-11 | 9.09E-04 |
| 13July2011 | 891   | 589.32 | -21.9937 | 2 K.EAELKFA' chr3@1100  | 4.05E-10 | 0.006282 |
| 13July2011 | 13014 | 684.87 | -26.1498 | 2 L.HLK+14.0 chrX@5908  | 4.09E-10 | 0.007581 |
| 13July2011 | 13366 | 902.46 | -10.0589 | 2 R.RKLHDPK Splice@chr  | 2.50E-10 | 0.00495  |
| 13July2011 | 14735 | 902.46 | -10.0589 | 2 R.RKLHDPK Splice@chr  | 5.29E-12 | 3.57E-04 |
| 13July2011 | 15244 | 730.94 | -1.46284 | 2 K.K+14.016 chr2@5295  | 4.79E-10 | 0.009759 |
| 13July2011 | 16371 | 730.93 | -15.1855 | 2 K.K+14.016 chr2@5295  | 2.71E-10 | 0.007027 |
| 13July2011 | 7675  | 467.26 | 24.96001 | 3 K.RRSSFSSI Splice@chr | 2.15E-10 | 0.006216 |
| 13July2011 | 17556 | 682.11 | -18.9975 | 4 K.ERESARR chr4@1388   | 4.64E-10 | 0.007969 |
| 13July2011 | 8231  | 561.65 | 12.55609 | 3 K.LENIFQK+ chr4@1106  | 4.39E-11 | 0.001156 |
| 13July2011 | 17612 | 799.44 | -7.00934 | 3 R.FTNSYFSI chr3@4491  | 2.99E-10 | 0.00557  |
| 13July2011 | 8845  | 570.54 | 22.50561 | 4 R.VFQDHF( chr1@2515   | 2.36E-10 | 0.005275 |
| 13July2011 | 14949 | 895.8  | -18.1727 | 3 K.SIFLKLQL chr1@1424  | 6.05E-10 | 0.009809 |
| 13July2011 | 17438 | 836.11 | -7.99079 | 3 K.LRFPKNC chr5@4000   | 4.04E-10 | 0.008966 |
| 13July2011 | 4280  | 793.93 | -3.84873 | 2 R.TK+14.01 chr1@7238  | 1.83E-10 | 0.005012 |
| 13July2011 | 4474  | 793.93 | -3.84873 | 2 R.TK+14.01 chr1@7238  | 4.19E-11 | 0.001461 |
| 13July2011 | 7638  | 619.31 | 12.49937 | 2 R.IDETCEK+ chr5@1850  | 5.64E-10 | 0.008788 |
| 13July2011 | 7065  | 431.27 | 14.71903 | 3 R.KMGGLL chr4@1642    | 2.98E-10 | 0.005409 |
| 13July2011 | 5877  | 431.27 | 14.71903 | 3 R.KMGGLL chr4@1642    | 2.00E-10 | 0.003497 |
| 13July2011 | 12737 | 793.46 | 18.45982 | 2 K.ERRKK+1 chr1@1445   | 2.00E-11 | 0.001933 |
| 13July2011 | 7776  | 450.22 | -20.7112 | 3 _..LTGPCAK Splice@chr | 2.52E-10 | 0.005293 |
| 13July2011 | 11970 | 655.35 | -23.9716 | 4 K.ISKENGKI chr5@3766  | 4.42E-10 | 0.006417 |
| 13July2011 | 13493 | 886.48 | -7.72004 | 3 R.ELRIFLNE Splice@chr | 4.15E-10 | 0.008581 |
| 13July2011 | 15156 | 849.97 | 11.763   | 2 K.LQIFFAEL chr5@1682  | 3.03E-10 | 0.006696 |
| 13July2011 | 18470 | 587.33 | -5.20489 | 4 F.VNFYQQI chr2@1332   | 4.94E-10 | 0.009425 |
| 13July2011 | 807   | 520.91 | -22.1222 | 3 _..NFNSSEY chr1@7195  | 3.10E-10 | 0.005598 |
| 13July2011 | 1301  | 520.91 | -22.1222 | 3 _..NFNSSEY chr1@7195  | 1.18E-10 | 0.003647 |
| 13July2011 | 1195  | 520.91 | -22.1222 | 3 _..NFNSSEY chr1@7195  | 3.73E-10 | 0.008194 |
| 13July2011 | 865   | 562.27 | -18.4865 | 2 K.SSSACLNI Splice@chr | 1.08E-10 | 0.004553 |
| 13July2011 | 13132 | 585.65 | -23.2226 | 3 K.LCPSIQFN chr5@1628  | 4.13E-10 | 0.00912  |
| 13July2011 | 907   | 506.93 | -18.9515 | 3 R.QIGK+14 chr1@2292   | 3.06E-10 | 0.007656 |
| 13July2011 | 1281  | 651.85 | 8.815279 | 2 K.KENQWG chr1@5414    | 4.07E-10 | 0.009347 |
| 13July2011 | 1969  | 651.85 | 8.815279 | 2 K.KENQWG chr1@5414    | 2.20E-11 | 4.19E-04 |
| 13July2011 | 8671  | 569.3  | -22.1717 | 3 R.NIDLGHV chr5@1385   | 9.39E-11 | 0.002684 |
| 13July2011 | 14782 | 681.38 | 22.84628 | 3 K.VMLLLGN chr1@1175   | 5.04E-10 | 0.007944 |
| 13July2011 | 12935 | 937.51 | 22.09432 | 2 R.ICISK+14 chr1@2705  | 2.99E-11 | 8.58E-04 |
| 13July2011 | 7366  | 672.35 | -24.805  | 4 R.SPGSWVI chr2@1527   | 1.40E-10 | 0.004325 |
| 13July2011 | 2204  | 577.28 | 18.2175  | 2 R.ELGMFQI Splice@chr  | 3.15E-10 | 0.007899 |
| 13July2011 | 14168 | 751.37 | -16.4306 | 4 K.K+14.016 chrX@7915  | 3.74E-10 | 0.008085 |
| 13July2011 | 2908  | 708.85 | -12.5028 | 2 K.YRIPCFEI' chr5@2035 | 9.31E-11 | 0.002752 |
| 13July2011 | 2856  | 708.85 | -12.5028 | 2 K.YRIPCFEI' chr5@2035 | 2.79E-10 | 0.007497 |
| 13July2011 | 2761  | 708.85 | -12.5028 | 2 K.YRIPCFEI' chr5@2035 | 3.34E-10 | 0.008674 |
| 13July2011 | 14779 | 873.95 | -5.07078 | 2 K.M+15.99 Splice@chr  | 1.02E-10 | 0.004556 |
| 13July2011 | 14806 | 873.95 | -5.07078 | 2 K.M+15.99 Splice@chr  | 3.91E-11 | 0.002545 |
| 13July2011 | 3907  | 630.81 | 3.973393 | 2 R.GEEAEDL chr2@7392   | 1.22E-10 | 0.005073 |

|            |       |         |          |                         |          |          |
|------------|-------|---------|----------|-------------------------|----------|----------|
| 13July2011 | 4453  | 681.04  | 4.341284 | 3 K.NFNFSNF chr5@1119   | 6.06E-11 | 0.003275 |
| 13July2011 | 11368 | 460.57  | -1.28322 | 3 R.ISSSNSNS chr4@2577  | 8.61E-12 | 3.21E-04 |
| 13July2011 | 13993 | 772.1   | -15.8306 | 3 I.KNEFNK+: chr5@1150  | 3.78E-10 | 0.0093   |
| 13July2011 | 10760 | 1157.65 | -12.3479 | 2 I.KNEFNK+: chr5@1150  | 2.07E-10 | 0.007219 |
| 13July2011 | 11345 | 1157.64 | -21.0019 | 2 I.KNEFNK+: chr5@1150  | 2.18E-10 | 0.007582 |
| 13July2011 | 14063 | 989.98  | -15.3428 | 2 R.DFVSRRG chr4@1454   | 2.90E-10 | 0.006533 |
| 13July2011 | 359   | 413.23  | -16.2867 | 2 K.AMKKYGI chr1@9310   | 3.93E-10 | 0.006412 |
| 13July2011 | 4959  | 573.34  | -19.1953 | 2 R.K+14.016 chr3@1278  | 2.94E-10 | 0.006223 |
| 13July2011 | 3966  | 457.79  | -19.3745 | 2 K.ARTAVRII chrX@1592  | 1.85E-10 | 0.003176 |
| 13July2011 | 4264  | 457.79  | -19.3745 | 2 K.ARTAVRII chrX@1592  | 1.08E-10 | 0.002414 |
| 13July2011 | 2269  | 500.9   | -22.6281 | 3 _PSSSAPSS Splice@chr  | 3.35E-10 | 0.007507 |
| 13July2011 | 3102  | 654.87  | 5.813848 | 4 K.K+14.016 chrX@1582  | 7.71E-11 | 0.003765 |
| 13July2011 | 18628 | 898.46  | -21.0825 | 2 L.QWK+14. Splice@chr  | 3.45E-10 | 0.00534  |
| 13July2011 | 1531  | 524.29  | 3.796475 | 2 R.HVFIHHT chr5@2058   | 4.28E-10 | 0.008823 |
| 13July2011 | 11718 | 877.01  | 5.822427 | 2 K.IFSPLLLVI chr1@1000 | 2.59E-10 | 0.007777 |
| 13July2011 | 7046  | 475.79  | -3.60104 | 2 R.LTIFGSLA chrX@1670  | 4.26E-10 | 0.00683  |
| 13July2011 | 16762 | 974.55  | 14.23172 | 2 R.LIGDTITA chrX@1940  | 4.46E-11 | 7.73E-04 |
| 13July2011 | 16554 | 724.03  | -23.9738 | 3 K.TLVK+14. chrX@1648  | 3.16E-10 | 0.00583  |
| 13July2011 | 10868 | 671.34  | -1.001   | 3 R.TADGLGF chr5@1880   | 3.43E-10 | 0.008669 |
| 13July2011 | 15576 | 624.36  | -23.9558 | 3 R.NAKIIGNI chrX@6451  | 1.25E-10 | 0.002422 |
| 13July2011 | 17907 | 649.35  | 9.978977 | 2 K.ILTFSSSW Splice@chr | 3.28E-10 | 0.00559  |
| 13July2011 | 12670 | 744.7   | -6.23732 | 3 K.EEWMFK Splice@chr   | 3.10E-10 | 0.008461 |
| 13July2011 | 9061  | 650.88  | -22.6339 | 2 R.LILTKHFG chr5@1407  | 5.42E-12 | 0.001012 |
| 13July2011 | 6448  | 550.79  | 0.666102 | 2 R.LQRNNYI chr5@1706   | 1.12E-10 | 0.003794 |
| 13July2011 | 7438  | 507.61  | -17.5897 | 3 R.K+14.016 chrX@1351  | 3.31E-10 | 0.008232 |
| 13July2011 | 20978 | 931.49  | -27.0707 | 2 K.MRVKSIS chrX@1585   | 4.13E-10 | 0.007671 |
| 13July2011 | 12102 | 692.36  | -10.9471 | 2 K.KDKNAAI chr3@8925   | 2.28E-10 | 0.005848 |
| 13July2011 | 15409 | 706.39  | 6.835741 | 2 L.EKPLELNF Splice@chr | 4.14E-10 | 0.008471 |
| 13July2011 | 5686  | 533.81  | -16.8393 | 2 K.IAITFFLNI chr1@3204 | 3.57E-10 | 0.008379 |
| 13July2011 | 4455  | 475.24  | 13.83578 | 2 R.DVSSEK Splice@chr   | 4.12E-10 | 0.009566 |
| 13July2011 | 12347 | 778.92  | -10.1997 | 2 K.MKKQRSI Splice@chr  | 1.98E-10 | 0.00551  |
| 13July2011 | 15043 | 682.13  | 8.781828 | 4 K.KFKNLRK chr3@2809   | 2.49E-10 | 0.003914 |
| 13July2011 | 8397  | 705.38  | 15.59758 | 3 R.EINQKCLI chr4@1355  | 2.46E-10 | 0.00674  |
| 13July2011 | 2     | 421.19  | 5.529019 | 2 R.RSCMMR chrX@1160    | 4.44E-10 | 0.009551 |
| 13July2011 | 12490 | 570.3   | 28.16191 | 3 R.SQK+14.( Splice@chr | 3.04E-10 | 0.00684  |
| 13July2011 | 5145  | 607.32  | 11.27474 | 2 K.TDMIKYN chr1@7755   | 9.80E-11 | 0.003462 |
| 13July2011 | 565   | 652.34  | 2.717545 | 2 K.KNDFFSE Splice@chr  | 3.23E-11 | 0.002058 |
| 13July2011 | 3875  | 423.56  | -8.1851  | 3 R.KSILMECI chr5@7134  | 2.44E-10 | 0.009408 |
| 13July2011 | 18459 | 716.75  | -11.2562 | 3 _NLEK+14. chr3@1410   | 1.46E-10 | 0.002797 |
| 13July2011 | 5907  | 643.83  | -28.5788 | 2 _NKACLLSI Splice@chr  | 3.50E-10 | 0.00544  |
| 13July2011 | 16335 | 858.48  | -28.3629 | 3 K.SNISQATI chr5@1237  | 1.25E-10 | 0.005073 |
| 13July2011 | 6492  | 543.03  | 16.02692 | 4 R.EKPVVER chr3@8311   | 3.38E-10 | 0.005155 |
| 13July2011 | 11135 | 563.64  | -11.9748 | 3 R.FSNQFIII chr3@9268  | 5.79E-10 | 0.008504 |
| 13July2011 | 8640  | 805.76  | -25.6695 | 3 R.PTTVEPV chr5@8657   | 1.11E-10 | 0.005293 |
| 13July2011 | 3093  | 483.26  | -21.5152 | 3 R.LAWKKQ chr5@6598    | 6.94E-11 | 0.002358 |
| 13July2011 | 13456 | 477.75  | -13.3785 | 2 R.FDLFGLSI chrX@1084  | 2.45E-10 | 0.006539 |
| 13July2011 | 18669 | 1016.19 | -8.07833 | 3 K.HPK+14.( chr4@7952  | 7.74E-11 | 0.001342 |

|            |       |        |          |                         |          |          |
|------------|-------|--------|----------|-------------------------|----------|----------|
| 13July2011 | 2736  | 495.94 | -28.1984 | 3 K.GLAK+14 Splice@chr  | 3.30E-10 | 0.008232 |
| 13July2011 | 8237  | 689.36 | 25.98055 | 4 K.SADLNW chr5@1304    | 2.37E-10 | 0.006216 |
| 13July2011 | 10828 | 542.97 | -21.9724 | 3 K.FTK+14.0 chrX@1627  | 5.27E-10 | 0.008474 |
| 13July2011 | 2690  | 602.33 | 11.43598 | 3 _.NPRFSFL chrX@2475   | 3.19E-11 | 0.001025 |
| 13July2011 | 11314 | 504.95 | 15.09928 | 3 K.RTNFYFFI chr2@1407  | 3.15E-10 | 0.00855  |
| 13July2011 | 10424 | 619.33 | 18.85414 | 2 K.TEKYNKN chr2@1827   | 4.66E-10 | 0.009247 |
| 13July2011 | 12909 | 784.37 | -24.1883 | 3 K.SFVCMCK chr2@5335   | 4.11E-10 | 0.009077 |
| 13July2011 | 3169  | 542.97 | -27.231  | 3 K.K+14.016 chr2@7651  | 5.57E-11 | 0.001098 |
| 13July2011 | 98    | 610.8  | -22.6202 | 2 K.TPEKEKEI chr2@1354  | 4.56E-10 | 0.009712 |
| 13July2011 | 10685 | 526.32 | 5.620742 | 3 _.SLSLSLSL Splice@chr | 3.07E-10 | 0.00621  |
| 13July2011 | 5681  | 578.81 | -28.8074 | 2 K.RCVPNIQ Splice@chr  | 7.72E-11 | 0.001227 |
| 13July2011 | 15696 | 613.6  | 21.75543 | 4 R.YPVTNK+ Splice@chr  | 6.38E-10 | 0.009671 |
| 13July2011 | 11741 | 657.1  | -17.9369 | 4 R.SVCSKFH Splice@chr  | 2.49E-10 | 0.003254 |
| 13July2011 | 12438 | 793.4  | -5.03237 | 3 R.GETFRVE chr1@5144   | 1.29E-10 | 0.00346  |
| 13July2011 | 13796 | 794.42 | -0.28789 | 4 K.KCMFNIK chrX@1084   | 3.01E-10 | 0.008377 |
| 13July2011 | 13967 | 874.81 | 17.16752 | 3 R.VHTFIDYI chr1@3015  | 4.13E-10 | 0.009566 |
| 13July2011 | 9454  | 772.1  | 1.266468 | 3 R.K+14.016 chrX@1022  | 1.61E-10 | 0.008969 |
| 13July2011 | 16201 | 760.88 | -4.39841 | 4 R.FFQEDFS Splice@chr  | 3.22E-10 | 0.00573  |
| 13July2011 | 15217 | 737.06 | 11.75378 | 3 L.YARNCDF chr1@1204   | 5.32E-10 | 0.009562 |
| 13July2011 | 14569 | 769.92 | 4.445221 | 2 K.LPLSVPLF chr1@1750  | 2.25E-10 | 0.004854 |
| 13July2011 | 9272  | 746.41 | 2.51106  | 3 R.KSQNKCK chr2@1503   | 6.57E-12 | 2.85E-04 |
| 13July2011 | 11440 | 632.83 | 8.307823 | 4 K.WGK+14. chrX@1671   | 4.51E-10 | 0.009366 |
| 13July2011 | 964   | 684.41 | -13.3071 | 2 K.K+14.016 chr2@9193  | 3.19E-10 | 0.007797 |
| 13July2011 | 8683  | 468.27 | 15.36723 | 2 _.ISSNMVK chr3@6931   | 4.29E-10 | 0.00751  |
| 13July2011 | 770   | 418.55 | 8.145503 | 3 _.ITTTCTT Splice@chr  | 2.32E-10 | 0.007918 |
| 13July2011 | 15432 | 626.09 | 23.76272 | 4 R.RMFSQLM chrX@9861   | 2.88E-10 | 0.005179 |
| 13July2011 | 10452 | 664.7  | 13.77201 | 3 R.RPKENG/ chr3@4612   | 3.42E-10 | 0.00952  |
| 13July2011 | 3566  | 503.27 | 9.64072  | 3 K.M+15.99 chr5@1218   | 2.30E-10 | 0.007519 |
| 13July2011 | 413   | 434.89 | 23.79416 | 3 _.LGTFENSI chr3@3622  | 1.61E-10 | 0.003775 |
| 13July2011 | 5735  | 496.26 | -28.6526 | 2 R.WPVLYW chr2@4609    | 2.73E-10 | 0.006288 |
| 13July2011 | 5988  | 496.26 | -28.6526 | 2 R.WPVLYW chr2@4609    | 3.47E-10 | 0.009012 |
| 13July2011 | 5399  | 496.26 | -28.6526 | 2 R.WPVLYW chr2@4609    | 1.84E-10 | 0.005697 |
| 13July2011 | 17414 | 756.37 | -26.2871 | 3 K.TCAIDKRI chr3@1277  | 2.07E-10 | 0.002702 |
| 13July2011 | 13437 | 754.39 | -20.9544 | 2 R.YRLPVGK Splice@chr  | 5.83E-11 | 0.002671 |
| 13July2011 | 11890 | 838.94 | 6.743083 | 2 _.ETAIPMT Splice@chr  | 2.77E-10 | 0.006529 |
| 13July2011 | 15022 | 823.75 | -25.3212 | 3 R.IFNFPGF chr4@1095   | 1.01E-10 | 0.002042 |
| 13July2011 | 13746 | 823.75 | -25.3212 | 3 R.IFNFPGF chr4@1095   | 2.91E-10 | 0.008469 |
| 13July2011 | 15368 | 504.01 | -19.514  | 4 K.SVYVNN\ chrX@1266   | 3.54E-10 | 0.006392 |
| 13July2011 | 1906  | 431.74 | -18.9876 | 2 _.DVSTISIK chr1@1024  | 2.24E-10 | 0.004854 |
| 13July2011 | 5521  | 595.35 | 17.83452 | 2 R.KMLHGIH Splice@chr  | 3.94E-10 | 0.007901 |
| 13July2011 | 11835 | 794.02 | -22.2889 | 5 Y.K+14.016 Splice@chr | 2.37E-10 | 0.00922  |
| 13July2011 | 12238 | 571.64 | -12.8771 | 3 R.IAEEK+14 chr1@2921  | 4.03E-10 | 0.007923 |
| 13July2011 | 13140 | 571.64 | -12.8771 | 3 R.IAEEK+14 chr1@2921  | 6.25E-11 | 0.001117 |
| 13July2011 | 11314 | 825.47 | -26.4799 | 2 R.ARK+14.( chr3@7780  | 4.26E-10 | 0.009706 |
| 13July2011 | 14796 | 676.67 | -26.6599 | 3 K.TSPKYVSI chr1@8720  | 2.92E-11 | 7.82E-04 |
| 13July2011 | 13118 | 819.77 | -23.3409 | 3 R.SNRILMT chr5@1311   | 8.51E-11 | 0.00473  |
| 13July2011 | 17809 | 760.38 | 2.330904 | 2 R.FFYNLYH chr3@6366   | 2.82E-10 | 0.005212 |

|            |       |         |          |                          |          |          |
|------------|-------|---------|----------|--------------------------|----------|----------|
| 13July2011 | 3947  | 448.23  | -3.82132 | 3 _..LNSFLSSY Splice@chr | 1.31E-11 | 4.41E-04 |
| 13July2011 | 3612  | 448.23  | -3.82132 | 3 _..LNSFLSSY Splice@chr | 1.54E-10 | 0.002478 |
| 13July2011 | 8733  | 733.06  | 20.56636 | 3 K.TLM+15.! chrX@3225   | 3.22E-11 | 0.00274  |
| 13July2011 | 12662 | 615.37  | 19.67113 | 2 K.M+15.99 chr2@3182    | 1.46E-10 | 0.003614 |
| 13July2011 | 12213 | 616.03  | -25.8019 | 3 _..NFPKQK+ chrX@1401   | 1.21E-10 | 0.004931 |
| 13July2011 | 11782 | 657.09  | -22.4197 | 4 K.K+14.016 chr2@1380   | 1.02E-10 | 0.0034   |
| 13July2011 | 4738  | 548.31  | 19.82721 | 3 R.K+14.016 chrX@1460   | 4.70E-10 | 0.008389 |
| 13July2011 | 13878 | 783.4   | 11.75379 | 3 K.ADEHIVR Splice@chr   | 3.93E-10 | 0.007923 |
| 13July2011 | 2114  | 508.27  | 7.460064 | 2 R.MIESTGL chr3@1367    | 4.68E-11 | 7.73E-04 |
| 13July2011 | 16751 | 984.82  | 13.92317 | 3 K.RNFTAAr chr5@1732    | 1.02E-11 | 5.81E-04 |
| 13July2011 | 1005  | 516.32  | 10.54154 | 2 R.KLSATDK chr4@1286    | 2.57E-10 | 0.004248 |
| 13July2011 | 12499 | 853.81  | -16.5858 | 3 K.K+14.016 chr3@9948   | 2.83E-10 | 0.007125 |
| 13July2011 | 90    | 543.36  | -28.7338 | 3 K.KMRKKRI chr2@1269    | 1.89E-10 | 0.005483 |
| 13July2011 | 10903 | 867.11  | -20.8427 | 3 _..IANFSQN chr1@1355   | 4.65E-10 | 0.009618 |
| 13July2011 | 3773  | 465.25  | -5.17123 | 3 L.RAPKYVG chr2@6716    | 6.25E-10 | 0.009486 |
| 13July2011 | 3025  | 409.22  | 18.83965 | 2 R.DPSTRGC chr3@1205    | 2.21E-10 | 0.005038 |
| 13July2011 | 8595  | 882.47  | -8.93228 | 2 R.IQSVRCV chr5@1549    | 1.08E-10 | 0.003564 |
| 13July2011 | 12294 | 617.01  | 1.38716  | 3 R.DAVQKN chrX@3825     | 2.60E-10 | 0.007292 |
| 13July2011 | 12406 | 766.15  | -7.97691 | 4 K.RNCSGHI chr3@5368    | 8.07E-12 | 6.75E-04 |
| 13July2011 | 18044 | 736.92  | 13.68497 | 2 S.KCANVQI chr2@5151    | 3.64E-11 | 0.00119  |
| 13July2011 | 6004  | 517.27  | -0.9458  | 2 K.WKDWSF Splice@chr    | 1.87E-10 | 0.003153 |
| 13July2011 | 12648 | 631.35  | 10.36741 | 3 K.VLTM+15 Splice@chr   | 4.45E-10 | 0.009498 |
| 13July2011 | 10073 | 572.65  | -27.4751 | 3 K.M+15.99 chrX@7279    | 2.12E-10 | 0.003422 |
| 13July2011 | 1578  | 414.88  | -0.68821 | 3 R.ISM+15.9 Splice@chr  | 2.90E-10 | 0.005314 |
| 13July2011 | 2167  | 414.88  | -0.68821 | 3 R.ISM+15.9 Splice@chr  | 8.92E-11 | 0.002583 |
| 13July2011 | 2277  | 414.88  | -0.68821 | 3 R.ISM+15.9 Splice@chr  | 3.15E-10 | 0.00583  |
| 13July2011 | 1931  | 414.89  | 23.49742 | 3 R.ISM+15.9 Splice@chr  | 8.84E-11 | 0.001353 |
| 13July2011 | 1725  | 414.88  | -0.68821 | 3 R.ISM+15.9 Splice@chr  | 1.57E-10 | 0.002915 |
| 13July2011 | 14215 | 726.4   | 22.66246 | 3 L.SQFGK+1 chr5@1916    | 8.46E-11 | 0.003331 |
| 13July2011 | 15187 | 726.4   | 22.66246 | 3 L.SQFGK+1 chr5@1916    | 1.69E-10 | 0.003046 |
| 13July2011 | 11597 | 491.96  | 24.86461 | 3 _..SSLVSLLG Splice@chr | 1.43E-10 | 0.005284 |
| 13July2011 | 19024 | 1179.11 | 17.02739 | 2 K.CRPQAGI chrX@1370    | 4.76E-10 | 0.007827 |
| 13July2011 | 258   | 677.33  | -10.1074 | 2 R.KICFENQ chr1@8918    | 1.15E-10 | 0.004187 |
| 13July2011 | 9442  | 790.76  | -12.3438 | 3 K.TTWSVES chr5@1755    | 7.25E-11 | 0.002815 |
| 13July2011 | 4298  | 417.22  | -11.0053 | 3 K.KGGSSSA chr5@8375    | 8.87E-11 | 0.001808 |
| 13July2011 | 3734  | 602.33  | 1.795386 | 3 K.NK+14.01 chr5@1508   | 5.71E-11 | 0.002996 |
| 13July2011 | 17582 | 621.32  | -24.1388 | 3 K.NVIAPM+ chrX@3765    | 3.69E-10 | 0.005654 |
| 13July2011 | 14778 | 818.09  | -19.5209 | 3 K.EK+14.01 Splice@chr  | 2.74E-10 | 0.004811 |
| 13July2011 | 1387  | 480.24  | 5.773701 | 3 R.TIICTSSD+ chr5@1679  | 7.76E-11 | 0.001342 |
| 13July2011 | 6938  | 648.34  | 1.41431  | 2 K.KMIEKAN chr5@2044    | 2.39E-10 | 0.009559 |
| 13July2011 | 13897 | 767.42  | -9.0255  | 3 K.TFLKNPK+ chr3@1045   | 2.56E-12 | 3.36E-04 |
| 13July2011 | 673   | 438.25  | 11.67185 | 2 K.YAEHVKK Splice@chr   | 2.00E-10 | 0.007448 |
| 13July2011 | 3547  | 412.22  | 0.964779 | 2 _..EAANYKK Splice@chr  | 1.32E-10 | 0.002586 |
| 13July2011 | 4262  | 839.42  | -4.36789 | 1 R.HGAENRI chr5@1765    | 1.74E-10 | 0.002838 |
| 13July2011 | 4762  | 839.42  | -4.36789 | 1 R.HGAENRI chr5@1765    | 6.63E-11 | 0.001439 |
| 13July2011 | 5326  | 839.42  | -4.36789 | 1 R.HGAENRI chr5@1765    | 9.48E-11 | 0.002669 |
| 13July2011 | 17186 | 705.38  | -9.53161 | 2 K.LIPFFSVC chr5@1289   | 2.61E-10 | 0.006047 |

|            |       |         |          |                          |          |          |
|------------|-------|---------|----------|--------------------------|----------|----------|
| 13July2011 | 206   | 422.89  | -18.7108 | 3 R.KYMNIQI chr4@650     | 2.46E-10 | 0.007664 |
| 13July2011 | 5071  | 883.9   | -8.6104  | 2 R.CAYHGKS chr5@126     | 4.45E-10 | 0.009251 |
| 13July2011 | 5636  | 883.39  | -18.0533 | 2 R.CAYHGKS chr5@126     | 4.92E-10 | 0.00888  |
| 13July2011 | 9046  | 612.08  | 19.61117 | 4 R.SDPRHTR chr5@102     | 2.85E-10 | 0.00987  |
| 13July2011 | 10683 | 599.31  | -27.679  | 3 R.FTELLAC chr2@199     | 1.14E-10 | 0.00116  |
| 13July2011 | 3532  | 409.73  | -2.3893  | 4 R.KKSGAVL chr4@768     | 5.88E-11 | 0.001076 |
| 13July2011 | 14997 | 652.7   | -10.3021 | 3 K.IGNLAEI chr5@370     | 6.37E-10 | 0.009226 |
| 13July2011 | 12944 | 824.4   | -1.98283 | 4 R.CFQDRH Splice@chr    | 3.40E-10 | 0.00559  |
| 13July2011 | 9932  | 596.82  | -24.2778 | 2 K.LLSKKEM chrX@692     | 1.39E-10 | 0.003656 |
| 13July2011 | 11458 | 596.82  | -24.2778 | 2 K.LLSKKEM chrX@692     | 9.48E-11 | 0.001225 |
| 13July2011 | 11052 | 596.82  | -24.2778 | 2 K.LLSKKEM chrX@692     | 1.27E-10 | 0.003572 |
| 13July2011 | 11108 | 596.82  | -24.2778 | 2 K.LLSKKEM chrX@692     | 9.18E-11 | 0.002627 |
| 13July2011 | 11163 | 596.82  | -24.2778 | 2 K.LLSKKEM chrX@692     | 1.95E-10 | 0.005415 |
| 13July2011 | 12803 | 596.82  | -24.2778 | 2 K.LLSKKEM chrX@692     | 3.32E-10 | 0.006207 |
| 13July2011 | 12746 | 596.82  | -24.2778 | 2 K.LLSKKEM chrX@692     | 1.70E-11 | 7.08E-04 |
| 13July2011 | 12859 | 596.82  | -24.2778 | 2 K.LLSKKEM chrX@692     | 4.20E-10 | 0.007856 |
| 13July2011 | 10536 | 596.82  | -24.2778 | 2 K.LLSKKEM chrX@692     | 5.93E-11 | 6.91E-04 |
| 13July2011 | 10589 | 596.82  | -24.2778 | 2 K.LLSKKEM chrX@692     | 1.08E-10 | 0.001846 |
| 13July2011 | 10832 | 597.32  | -27.093  | 2 K.LLSKKEM chrX@692     | 2.12E-10 | 0.006686 |
| 13July2011 | 10943 | 596.82  | -24.2778 | 2 K.LLSKKEM chrX@692     | 5.09E-10 | 0.008049 |
| 13July2011 | 11002 | 596.82  | -24.2778 | 2 K.LLSKKEM chrX@692     | 5.56E-10 | 0.008437 |
| 13July2011 | 10828 | 596.82  | -24.2778 | 2 K.LLSKKEM chrX@692     | 6.02E-11 | 0.001337 |
| 13July2011 | 10775 | 596.82  | -24.2778 | 2 K.LLSKKEM chrX@692     | 1.43E-10 | 0.003372 |
| 13July2011 | 7843  | 596.82  | -24.2778 | 2 K.LLSKKEM chrX@692     | 3.39E-11 | 4.03E-04 |
| 13July2011 | 9225  | 596.82  | -24.2778 | 2 K.LLSKKEM chrX@692     | 2.59E-10 | 0.006396 |
| 13July2011 | 8354  | 596.82  | -24.2778 | 2 K.LLSKKEM chrX@692     | 1.00E-10 | 0.003288 |
| 13July2011 | 8598  | 596.82  | -24.2778 | 2 K.LLSKKEM chrX@692     | 2.65E-11 | 0.001933 |
| 13July2011 | 9864  | 596.82  | -24.2778 | 2 K.LLSKKEM chrX@692     | 7.36E-11 | 0.003103 |
| 13July2011 | 10199 | 596.82  | -24.2778 | 2 K.LLSKKEM chrX@692     | 3.14E-10 | 0.008235 |
| 13July2011 | 10144 | 596.82  | -24.2778 | 2 K.LLSKKEM chrX@692     | 2.36E-10 | 0.00598  |
| 13July2011 | 11038 | 596.82  | -24.2778 | 2 K.LLSKKEM chrX@692     | 3.41E-10 | 0.005996 |
| 13July2011 | 10307 | 555.3   | 21.48689 | 3 H.QENGFS chr5@149      | 9.29E-11 | 0.003139 |
| 13July2011 | 17545 | 783.93  | 26.74036 | 2 R.WQSILQS Splice@chr   | 5.56E-10 | 0.009087 |
| 13July2011 | 6847  | 763.38  | -2.60223 | 2 K.KFGNCRS chr2@163     | 1.58E-11 | 0.002525 |
| 13July2011 | 13631 | 655.35  | -10.1266 | 2 R.KM+15.9 Splice@chr   | 6.21E-10 | 0.008802 |
| 13July2011 | 8900  | 672.87  | 26.77609 | 2 W.GVTLIQ chr2@243      | 5.01E-10 | 0.008975 |
| 13July2011 | 9799  | 578.63  | -7.43487 | 3 R.EMTRNSI Splice@chr   | 4.21E-11 | 9.91E-04 |
| 13July2011 | 2903  | 667.36  | -15.077  | 2 _WK+14.0 Splice@chr    | 4.21E-10 | 0.009319 |
| 13July2011 | 15693 | 1008.51 | -27.7882 | 2 _RFSIDQFI chr1@107     | 6.65E-11 | 0.001303 |
| 13July2011 | 5449  | 868.43  | 12.38419 | 2 R.HRCVHC chrX@169      | 2.14E-10 | 0.005279 |
| 13July2011 | 14142 | 617.35  | -1.88139 | 3 E.NK+14.0 chr1@948     | 2.42E-10 | 0.005297 |
| 13July2011 | 14552 | 662.88  | -16.5986 | 2 K.KFKKFDK chr4@140     | 9.87E-11 | 0.001527 |
| 13July2011 | 9811  | 739.08  | 17.97278 | 3 Q.IPKLPKIS chr5@101    | 2.05E-11 | 3.58E-04 |
| 13July2011 | 10741 | 810.76  | -23.8018 | 3 K.FK+14.01 chr5@395    | 3.77E-10 | 0.009558 |
| 13July2011 | 12692 | 664.7   | 27.08325 | 3 R.TPLPDIN chr4@108     | 4.27E-10 | 0.007384 |
| 13July2011 | 6543  | 675.01  | -21.6522 | 3 K.IEKSIITSD Splice@chr | 2.68E-10 | 0.007809 |
| 13July2011 | 14287 | 649.92  | -24.9894 | 2 K.FLPLKKT chr4@165     | 3.97E-10 | 0.006777 |

|            |       |        |          |                         |          |          |
|------------|-------|--------|----------|-------------------------|----------|----------|
| 13July2011 | 5816  | 538.76 | -0.227   | 2 K.NISEYGTI chr4@905   | 4.50E-10 | 0.008407 |
| 13July2011 | 4007  | 626.81 | 11.70387 | 4 K.M+15.99 Splice@chr  | 1.87E-10 | 0.005533 |
| 13July2011 | 462   | 580.81 | 18.10659 | 2 R.KVQESSP chr2@1131   | 9.54E-12 | 2.97E-04 |
| 13July2011 | 2238  | 646.85 | -22.6806 | 2 R.QEKLEKN chr5@120    | 4.17E-10 | 0.007671 |
| 13July2011 | 18771 | 848.45 | -13.1931 | 1 R.AWKTFW chrX@1080    | 3.49E-10 | 0.005926 |
| 13July2011 | 19040 | 641.67 | -29.3879 | 3 _ .NKCYRIF chrX@4691  | 3.21E-10 | 0.005615 |
| 13July2011 | 2249  | 429.75 | -27.8303 | 2 K.KGGVAS/ chr5@3587   | 5.51E-10 | 0.009961 |
| 13July2011 | 1582  | 544.79 | 1.908116 | 2 R.GTNVLVS Splice@chr  | 7.87E-11 | 0.002696 |
| 13July2011 | 8915  | 759.9  | -14.3157 | 4 R.VPKVEKP chr3@9607   | 1.08E-10 | 0.003708 |
| 13July2011 | 2625  | 446.75 | -24.852  | 2 K.LSAVFDLI chr2@208   | 2.79E-10 | 0.004811 |
| 13July2011 | 2607  | 446.75 | -24.852  | 2 K.LSAVFDLI chr2@208   | 1.86E-10 | 0.005012 |
| 13July2011 | 2852  | 446.75 | -24.852  | 2 K.LSAVFDLI chr2@208   | 2.91E-10 | 0.00557  |
| 13July2011 | 2908  | 446.75 | -24.852  | 2 K.LSAVFDLI chr2@208   | 4.96E-10 | 0.009079 |
| 13July2011 | 11985 | 628.82 | 15.84692 | 2 K.EEDQSAI Splice@chr  | 4.54E-10 | 0.009196 |
| 13July2011 | 7857  | 689.36 | -22.95   | 4 S.YKNLIELY chrX@7814  | 8.21E-11 | 0.003175 |
| 13July2011 | 6593  | 697.33 | -11.8331 | 2 K.FVHYNAN Splice@chr  | 1.18E-10 | 0.003697 |
| 13July2011 | 10194 | 530.62 | -11.0634 | 3 R.CVRMTEI chr4@1617   | 1.07E-10 | 0.002983 |
| 13July2011 | 292   | 402.23 | -25.7588 | 3 K.ILNFASA/ chr4@170   | 2.38E-10 | 0.006121 |
| 13July2011 | 16430 | 821.1  | -28.3657 | 3 R.KPRK+14 chr3@683    | 2.69E-10 | 0.004811 |
| 13July2011 | 10936 | 547.8  | 19.42296 | 2 R.WIDCFLL chr2@2424   | 2.09E-10 | 0.00467  |
| 13July2011 | 6224  | 460.75 | -15.599  | 2 R.LTGLHHS chr3@2331   | 4.81E-10 | 0.008315 |
| 13July2011 | 4899  | 426.23 | 17.29652 | 2 K.LGHPGEN chr1@459    | 3.25E-10 | 0.005776 |
| 13July2011 | 10935 | 473.92 | 6.846705 | 3 _ .NCQTISD chr1@840   | 2.19E-10 | 0.004648 |
| 13July2011 | 263   | 452.25 | -27.0247 | 3 K.FTLKAM+ chr5@745    | 3.97E-11 | 0.002516 |
| 13July2011 | 3048  | 469.58 | -0.34735 | 3 K.QALCSMI chrX@8031   | 1.46E-10 | 0.004169 |
| 13July2011 | 3408  | 497.27 | 14.67699 | 3 R.SIFSKNTT chr4@4210  | 2.80E-10 | 0.005382 |
| 13July2011 | 9515  | 645.33 | -15.2577 | 3 K.FEALHTL Splice@chr  | 5.59E-11 | 5.59E-04 |
| 13July2011 | 5469  | 589.31 | -28.6043 | 2 K.KQFCGRF chr3@130    | 1.19E-10 | 0.00393  |
| 13July2011 | 19276 | 679.35 | -25.013  | 4 R.VVTMLM chr1@762     | 7.78E-11 | 0.001167 |
| 13July2011 | 3574  | 565.28 | 17.52322 | 2 K.KNGSHW chr5@4571    | 1.26E-10 | 0.003448 |
| 13July2011 | 10262 | 612.33 | 14.37734 | 2 K.MQLFSDI chr3@178    | 3.44E-10 | 0.008777 |
| 13July2011 | 15507 | 833.44 | 20.82373 | 3 Q.K+14.01 Splice@chr  | 3.07E-10 | 0.008101 |
| 13July2011 | 2289  | 580.29 | -14.9614 | 2 K.LTLSQHA chr4@109    | 1.04E-10 | 0.00287  |
| 13July2011 | 3467  | 528.28 | 7.176951 | 2 K.IALAYEM chr2@6701   | 2.74E-10 | 0.006098 |
| 13July2011 | 1568  | 424.22 | -18.676  | 4 K.MK+14.0 Splice@chr  | 1.13E-10 | 0.004556 |
| 13July2011 | 18692 | 736.42 | -11.1211 | 2 K.ISGKSANI chr2@2614  | 3.00E-10 | 0.005522 |
| 13July2011 | 12899 | 938.84 | 5.813946 | 3 K.NLINFRSf chr4@144   | 3.13E-10 | 0.006409 |
| 13July2011 | 12416 | 669.69 | -19.5111 | 3 K.IIFRILNSN chr3@1071 | 1.12E-10 | 0.004038 |
| 13July2011 | 12400 | 675.69 | 6.366965 | 3 _ .TCSKRK+ Splice@chr | 2.03E-10 | 0.006216 |
| 13July2011 | 5784  | 564.78 | 2.085929 | 4 K.FFSFQAQ chr3@4361   | 5.52E-10 | 0.009087 |
| 13July2011 | 9421  | 659.88 | -14.1731 | 2 K.RVTAK+1 chr4@928    | 2.33E-10 | 0.005133 |
| 13July2011 | 7690  | 791.94 | -24.5918 | 2 K.NVSK+14 chr5@115    | 1.90E-10 | 0.006691 |
| 13July2011 | 11624 | 486.6  | 6.28465  | 3 R.IFPVSSSV chr5@187   | 1.53E-10 | 0.00426  |
| 13July2011 | 832   | 557.31 | -26.8797 | 2 R.KEKPGIW Splice@chr  | 5.09E-11 | 0.002512 |
| 13July2011 | 7364  | 529.62 | -25.3004 | 3 K.SLK+14.0 chr1@1210  | 2.77E-10 | 0.008156 |
| 13July2011 | 6686  | 787.94 | 19.98643 | 2 K.TDSQKKV chrX@390    | 3.43E-10 | 0.005829 |
| 13July2011 | 12884 | 533.78 | -10.7441 | 4 N.RMK+14. chrX@106    | 1.52E-10 | 0.003416 |

|            |       |        |          |                         |          |          |
|------------|-------|--------|----------|-------------------------|----------|----------|
| 13July2011 | 2211  | 486.29 | -3.90075 | 2 R.LWNLSPL chr5@1484   | 4.23E-10 | 0.009242 |
| 13July2011 | 4632  | 511.27 | 6.048658 | 2 F.WSSNAK chrX@1201    | 2.26E-10 | 0.00414  |
| 13July2011 | 11737 | 697.71 | 15.69024 | 3 K.NNTESIK chrX@4774   | 1.70E-10 | 0.005582 |
| 13July2011 | 122   | 524.3  | -13.5297 | 2 K.KLHEHKC chr2@9380   | 2.36E-10 | 0.007025 |
| 13July2011 | 13294 | 657.1  | -7.72129 | 4 R.VVM+15. chrX@1572   | 1.48E-10 | 0.002734 |
| 13July2011 | 2610  | 403.23 | 2.737497 | 2 K.IDSATAVI Splice@chr | 2.22E-11 | 7.08E-04 |
| 13July2011 | 2017  | 403.23 | 2.737497 | 2 K.IDSATAVI Splice@chr | 6.47E-11 | 0.002213 |
| 13July2011 | 2116  | 403.23 | 2.737497 | 2 K.IDSATAVI Splice@chr | 2.56E-10 | 0.00449  |
| 13July2011 | 2483  | 403.23 | 2.737497 | 2 K.IDSATAVI Splice@chr | 7.73E-11 | 0.002199 |
| 13July2011 | 2832  | 493.24 | -27.7745 | 2 R.FSAKFEEI Splice@chr | 4.56E-10 | 0.009712 |
| 13July2011 | 4508  | 793.91 | -25.0169 | 2 _FKKK+14. chr2@1162   | 1.52E-11 | 0        |
| 13July2011 | 6350  | 793.91 | -25.0169 | 2 _FKKK+14. chr2@1162   | 2.90E-11 | 0.001131 |
| 13July2011 | 1446  | 716.84 | -23.5325 | 4 K.KNQSYM chrX@1590    | 1.74E-10 | 0.003056 |
| 13July2011 | 16801 | 694.06 | 25.17167 | 3 R.LK+14.01 Splice@chr | 4.92E-10 | 0.008151 |
| 13July2011 | 13637 | 670.4  | 21.18574 | 4 R.RRILSVQI chr1@1465  | 1.38E-11 | 0        |
| 13July2011 | 144   | 400.57 | -26.7823 | 3 K.KLGLTTW chr2@1350   | 3.96E-10 | 0.007923 |
| 13July2011 | 110   | 400.57 | -26.7823 | 3 K.KLGLTTW chr2@1350   | 2.10E-10 | 0.007448 |
| 13July2011 | 20076 | 987.5  | -15.5912 | 3 _NKHPKER Splice@chr   | 3.80E-10 | 0.007227 |
| 13July2011 | 10003 | 547.8  | 23.10671 | 2 K.M+15.99 chr3@7057   | 1.95E-10 | 0.003324 |
| 13July2011 | 3988  | 610.35 | 17.99664 | 2 _FHVAK+1 chrX@1477    | 4.30E-10 | 0.008922 |
| 13July2011 | 18289 | 675.85 | -14.1994 | 4 _PYDVVTL chr1@3287    | 1.26E-10 | 0.001966 |
| 13July2011 | 3983  | 622.8  | 27.48557 | 2 K.M+15.99 chrX@5320   | 1.87E-10 | 0.003128 |
| 13July2011 | 15270 | 810.89 | 1.471817 | 2 K.IDSWVG chr4@1751    | 2.38E-10 | 0.005275 |
| 13July2011 | 15351 | 864.17 | -0.09428 | 3 K.FQLLIISVI chr5@3992 | 4.61E-10 | 0.008073 |
| 13July2011 | 15092 | 960.15 | -21.7059 | 3 R.NQVINSI Splice@chr  | 3.02E-11 | 0.00119  |
| 13July2011 | 2058  | 515.33 | 24.92154 | 3 R.LQQK+14 chr4@7855   | 1.03E-10 | 0.003713 |
| 13July2011 | 3501  | 444.92 | 12.64959 | 3 K.NSPFSIIS Splice@chr | 3.21E-10 | 0.005829 |
| 13July2011 | 15661 | 504.78 | 6.126659 | 2 R.FPANFRC chr5@2004   | 9.73E-11 | 0.001798 |
| 13July2011 | 3766  | 622.32 | 27.87489 | 2 G.QLEEHW chrX@8700    | 2.06E-10 | 0.004774 |
| 13July2011 | 8314  | 764.43 | -20.3067 | 2 K.NARKQEI chr4@1670   | 2.36E-10 | 0.003813 |
| 13July2011 | 17936 | 649.28 | 19.772   | 2 K.DCTTNGC chr4@1012   | 4.07E-10 | 0.007054 |
| 13July2011 | 17551 | 696.63 | 1.491613 | 4 R.IRKAENN Splice@chr  | 3.96E-10 | 0.006961 |
| 13July2011 | 11022 | 684.94 | 22.9356  | 2 G.ISK+14.0 chr1@1258  | 3.85E-10 | 0.006675 |
| 13July2011 | 10679 | 947.99 | 2.64255  | 2 K.RKKEK+1. chr1@5007  | 3.25E-10 | 0.007021 |
| 13July2011 | 8918  | 947.99 | 2.64255  | 2 K.RKKEK+1. chr1@5007  | 1.09E-10 | 0.003713 |
| 13July2011 | 3019  | 589.8  | -24.0489 | 2 K.K+14.016 chr5@4532  | 1.47E-10 | 0.003793 |
| 13July2011 | 2162  | 588.35 | 12.58256 | 3 K.K+14.016 chr3@9812  | 5.08E-10 | 0.008256 |
| 13July2011 | 3209  | 488.93 | -10.1378 | 3 _DNNYKD Splice@chr    | 3.67E-10 | 0.006555 |
| 13July2011 | 162   | 449.25 | -10.0762 | 3 K.ENKLFLDI chr5@1234  | 3.52E-10 | 0.007684 |
| 13July2011 | 14749 | 699.37 | 16.72184 | 4 K.KNM+15. chr4@2891   | 2.89E-10 | 0.004912 |
| 13July2011 | 17297 | 950.83 | -17.2052 | 3 R.RKRKENT chr4@5537   | 1.12E-10 | 0.001846 |
| 13July2011 | 2283  | 416.26 | 28.99417 | 2 K.KGGGVEI chrX@7725   | 3.89E-10 | 0.006863 |
| 13July2011 | 15183 | 783.93 | -26.4271 | 4 K.IRRDQPF Splice@chr  | 8.08E-11 | 0.003716 |
| 13July2011 | 5557  | 682.69 | 10.38629 | 3 K.SLKDSNL chr4@1015   | 2.08E-10 | 0.006496 |
| 13July2011 | 4056  | 666.86 | -11.6413 | 2 _K+14.016 chr3@1798   | 2.95E-10 | 0.006092 |
| 13July2011 | 3309  | 666.87 | 3.391555 | 2 _K+14.016 chr3@1798   | 2.98E-10 | 0.008377 |
| 13July2011 | 13590 | 764.38 | -22.7956 | 3 R.IFNNDLN Splice@chr  | 2.39E-10 | 0.003813 |

|            |       |         |          |                         |          |          |
|------------|-------|---------|----------|-------------------------|----------|----------|
| 13July2011 | 524   | 476.25  | -8.92578 | 2 K.IKEMATN chr2@725    | 1.21E-11 | 8.19E-04 |
| 13July2011 | 18305 | 688.84  | 13.54379 | 2 R.SFTLSMF chrX@155    | 1.20E-11 | 1.50E-04 |
| 13July2011 | 15210 | 774.15  | -15.5364 | 4 K.FFLKSVSF Splice@chr | 1.21E-11 | 6.70E-04 |
| 13July2011 | 309   | 437.88  | -24.186  | 3 _QKSIFGM Splice@chr   | 5.18E-10 | 0.008459 |
| 13July2011 | 6751  | 505.94  | -18.6661 | 3 K.NVFYSAT chr5@175    | 2.31E-10 | 0.005959 |
| 13July2011 | 3568  | 409.91  | -5.77158 | 3 K.LQKIQIG\ chr2@572   | 3.18E-10 | 0.007926 |
| 13July2011 | 4767  | 409.91  | -5.77158 | 3 K.LQKIQIG\ chr2@572   | 2.20E-10 | 0.007448 |
| 13July2011 | 3737  | 409.91  | -5.77158 | 3 K.LQKIQIG\ chr2@572   | 2.47E-10 | 0.005772 |
| 13July2011 | 6519  | 738.4   | -6.08636 | 2 R.K+14.016 chrX@175   | 6.11E-11 | 0.003275 |
| 13July2011 | 12612 | 900.46  | 24.70097 | 2 R.EESRSLA chr1@853    | 4.63E-10 | 0.007969 |
| 13July2011 | 9715  | 706.13  | 6.343555 | 4 K.RLSYEKK( chr1@461   | 1.71E-10 | 0.003156 |
| 13July2011 | 3683  | 579.32  | 0.633241 | 4 R.MKNVESI chr5@970    | 1.24E-10 | 0.004693 |
| 13July2011 | 19112 | 669.85  | 28.01605 | 4 K.FIHTNNF( chrX@119   | 5.98E-10 | 0.009809 |
| 13July2011 | 7030  | 565.32  | -20.5497 | 2 _KQREKER chr2@103     | 1.86E-10 | 0.005317 |
| 13July2011 | 6435  | 565.32  | -20.5497 | 2 _KQREKER chr2@103     | 2.97E-10 | 0.004912 |
| 13July2011 | 5331  | 565.32  | -20.5497 | 2 _KQREKER chr2@103     | 1.16E-10 | 0.00393  |
| 13July2011 | 757   | 501.28  | -12.6546 | 3 R.EFLQKSA chr5@248    | 1.66E-10 | 0.002814 |
| 13July2011 | 15985 | 703.08  | -22.8155 | 3 K.LTK+14.0 chr5@384   | 2.99E-10 | 0.006599 |
| 13July2011 | 17259 | 703.08  | -22.8155 | 3 K.LTK+14.0 chr5@384   | 1.44E-10 | 0.002392 |
| 13July2011 | 16064 | 703.08  | -22.8155 | 3 K.LTK+14.0 chr5@384   | 1.77E-10 | 0.002838 |
| 13July2011 | 3100  | 702.88  | -28.6961 | 2 P.NRNISVT chrX@218    | 2.78E-10 | 0.005232 |
| 13July2011 | 3156  | 702.88  | -28.6961 | 2 P.NRNISVT chrX@218    | 8.06E-11 | 0.001548 |
| 13July2011 | 3625  | 702.88  | -28.6961 | 2 P.NRNISVT chrX@218    | 4.48E-10 | 0.007819 |
| 13July2011 | 3513  | 702.88  | -28.6961 | 2 P.NRNISVT chrX@218    | 7.23E-11 | 0.001956 |
| 13July2011 | 3564  | 702.88  | -28.6961 | 2 P.NRNISVT chrX@218    | 1.65E-10 | 0.003787 |
| 13July2011 | 18258 | 869.48  | 13.86854 | 3 R.VLIEPGM chr1@659    | 1.27E-10 | 0.003697 |
| 13July2011 | 18934 | 1131.23 | 17.88117 | 3 R.ASCGLTLI Splice@chr | 2.97E-10 | 0.004597 |
| 13July2011 | 3935  | 590.79  | 25.22315 | 2 _DVGLEM' chr1@690     | 3.53E-10 | 0.006555 |
| 13July2011 | 7436  | 558.3   | -13.1423 | 3 E.PFDAIDL\ chr4@778   | 3.95E-10 | 0.009753 |
| 13July2011 | 652   | 498.27  | 18.71214 | 3 K.CPNK+14 chr3@129    | 3.65E-10 | 0.009903 |
| 13July2011 | 481   | 589.83  | 8.603551 | 2 K.YSIPQKL( chr5@558   | 1.72E-10 | 0.004921 |
| 13July2011 | 245   | 601.84  | -1.82852 | 2 K.KKTPNEK chr1@929    | 1.94E-10 | 0.003161 |
| 13July2011 | 13002 | 651.64  | -16.4236 | 3 R.MASVGD Splice@chr   | 8.84E-11 | 0.001225 |
| 13July2011 | 11295 | 651.64  | -16.4236 | 3 R.MASVGD Splice@chr   | 9.22E-11 | 0.001894 |
| 13July2011 | 10542 | 769.92  | -3.29495 | 2 P.GKNSLPP chr1@259    | 2.12E-10 | 0.008271 |
| 13July2011 | 3218  | 501.59  | -8.94133 | 3 K.SIYPSPD chr3@955    | 1.85E-11 | 3.58E-04 |
| 13July2011 | 10135 | 637.86  | -28.8198 | 2 K.AHLLLPLf chr1@140   | 3.78E-10 | 0.008194 |
| 13July2011 | 10095 | 814.96  | 21.4465  | 2 R.RWRWLA chr2@131     | 8.26E-12 | 0        |
| 13July2011 | 13048 | 556.32  | 6.85852  | 5 R.TIRCATLK chr4@161   | 1.31E-10 | 0.003448 |
| 13July2011 | 9557  | 889.96  | -22.0964 | 4 E.EKTKKEKI chr4@439   | 2.16E-10 | 0.005279 |
| 13July2011 | 18144 | 687.63  | -27.6317 | 4 K.NALKNFV chr1@705    | 4.91E-10 | 0.00888  |
| 13July2011 | 16119 | 768.07  | -6.04729 | 3 K.QSILKSLD Splice@chr | 2.38E-10 | 0.006183 |
| 13July2011 | 17485 | 577.01  | -4.41645 | 3 R.HRK+14.( chr2@902   | 2.42E-10 | 0.005243 |
| 13July2011 | 9105  | 594.32  | -12.2202 | 4 R.LLQCPHH chrX@706    | 3.22E-11 | 0.001462 |
| 13July2011 | 1737  | 735.33  | -27.5112 | 2 K.YGHANVI chr1@106    | 1.92E-10 | 0.00567  |
| 13July2011 | 9725  | 1134.06 | -5.36126 | 2 _IPSAVGY( Splice@chr  | 2.73E-14 | 0        |
| 13July2011 | 969   | 562.31  | -13.4391 | 2 R.FYLLYLYK Splice@chr | 5.21E-11 | 0.002049 |

|            |       |         |          |                         |          |          |
|------------|-------|---------|----------|-------------------------|----------|----------|
| 13July2011 | 8545  | 805.42  | -12.2158 | 2 R.QISTCKSS Splice@chr | 2.06E-11 | 5.13E-04 |
| 13July2011 | 9891  | 685.88  | 4.188613 | 2 K.IVPGGGA chrX@1570   | 4.53E-19 | 0        |
| 13July2011 | 10430 | 858.48  | 6.006088 | 3 _LETGIKPI Splice@chr  | 1.97E-12 | 0        |
| 13July2011 | 10378 | 664.7   | 1.197202 | 3 _PTLNK+1 chr1@6526    | 2.61E-10 | 0.006324 |
| 13July2011 | 9037  | 675.34  | 0.543072 | 2 R.QSLYFQD chr5@2555   | 4.99E-11 | 9.73E-04 |
| 13July2011 | 11156 | 770.4   | -26.4264 | 3 R.NMTSIHS Splice@chr  | 2.02E-10 | 0.005414 |
| 13July2011 | 10623 | 894     | -12.2343 | 2 _VETGIKPI Splice@chr  | 3.20E-11 | 2.51E-04 |
| 13July2011 | 11885 | 876.51  | -18.0997 | 2 K.NQAIQNI chr2@9182   | 8.37E-11 | 0.002533 |
| 13July2011 | 1747  | 432.22  | 23.49673 | 2 _LPMMES Splice@chr    | 2.19E-10 | 0.005611 |
| 13July2011 | 4920  | 696.83  | -11.9803 | 2 R.TDRTESV chr1@1452   | 2.70E-10 | 0.006494 |
| 13July2011 | 6958  | 703.87  | 11.02855 | 2 Y.VVQVAID chr1@1045   | 2.70E-13 | 0        |
| 13July2011 | 10035 | 1134.06 | -5.36126 | 2 _IPSAVGY Splice@chr   | 1.85E-15 | 0        |
| 13July2011 | 3948  | 693.87  | -6.6949  | 2 V.ICVAVGD chr5@1065   | 1.65E-10 | 0.005134 |
| 13July2011 | 9693  | 691.88  | 0.618416 | 2 R.KFAFFFTI chr1@1181  | 3.01E-10 | 0.007031 |
| 13July2011 | 3903  | 693.87  | -6.6949  | 2 V.ICVAVGD chr5@1065   | 3.93E-10 | 0.009219 |
| 13July2011 | 10484 | 664.7   | 1.197202 | 3 _PTLNK+1 chr1@6526    | 3.43E-10 | 0.008328 |
| 13July2011 | 4863  | 496.26  | -28.6526 | 2 R.WPVLYW chr2@4609    | 1.50E-10 | 0.004927 |
| 13July2011 | 9613  | 660.37  | -16.199  | 2 K.TK+14.01 chr1@1424  | 1.63E-10 | 0.004927 |
| 13July2011 | 9947  | 554.96  | 11.60589 | 3 H.QENGFSI chr5@1495   | 2.23E-10 | 0.005803 |
| 13July2011 | 8873  | 596.82  | -24.2778 | 2 K.LLSKKEM chrX@6920   | 1.73E-11 | 2.51E-04 |
| 13July2011 | 2303  | 400.72  | 7.024146 | 2 _SDAVPGV Splice@chr   | 2.25E-11 | 2.51E-04 |
| 13July2011 | 6324  | 626.68  | 23.52414 | 3 R.VVDALGI Splice@chr  | 3.11E-11 | 2.51E-04 |
| 13July2011 | 3044  | 527.29  | 11.90088 | 2 K.KLDLNMI chr2@7182   | 2.91E-11 | 2.51E-04 |
| 13July2011 | 9980  | 1134.06 | -5.36126 | 2 _IPSAVGY Splice@chr   | 4.72E-17 | 0        |
| 13July2011 | 12012 | 908.98  | -14.5601 | 2 M.VK+14.0 Splice@chr  | 1.99E-10 | 0.005414 |
| 13July2011 | 10674 | 894.5   | -14.1127 | 2 _VETGIKPI Splice@chr  | 4.98E-13 | 0        |
| 13July2011 | 6912  | 703.87  | 11.02855 | 2 Y.VVQVAID chr1@1045   | 7.06E-11 | 0.002115 |
| 13July2011 | 1143  | 562.31  | -13.4391 | 2 R.FYLLYLYK Splice@chr | 6.13E-11 | 0.001656 |
| 13July2011 | 1147  | 530.76  | -26.2682 | 2 L.RADHTHF chr3@8398   | 6.57E-11 | 0.001656 |
| 13July2011 | 11749 | 876.51  | -18.0997 | 2 K.NQAIQNI chr2@9182   | 5.75E-11 | 0.001436 |
| 13July2011 | 8923  | 596.82  | -24.2778 | 2 K.LLSKKEM chrX@6920   | 5.96E-11 | 0.001656 |
| 13July2011 | 10184 | 685.88  | 4.188613 | 2 K.IVPGGGA chrX@1570   | 4.03E-17 | 0        |
| 13July2011 | 10988 | 901.51  | -11.5614 | 2 _LETGIKPI Splice@chr  | 3.32E-10 | 0.008137 |
| 13July2011 | 10854 | 498.78  | 0.306542 | 2 R.FKQFAVE Splice@chr  | 1.76E-10 | 0.004131 |
| 13July2011 | 1157  | 424.22  | -29.2035 | 4 K.KNCSIKW chr2@2816   | 6.88E-11 | 0.002239 |
| 13July2011 | 540   | 452.23  | -1.48793 | 2 R.SGEPLSA Splice@chr  | 1.60E-10 | 0.00361  |
| 13July2011 | 10871 | 858.48  | 6.006088 | 3 _LETGIKPI Splice@chr  | 1.31E-10 | 0.00308  |
| 13July2011 | 4540  | 559.79  | 11.35993 | 2 R.DGWSIGI chr4@4255   | 2.61E-10 | 0.005473 |
| 13July2011 | 5136  | 565.32  | -20.5497 | 2 _KQREKER chr2@1038    | 2.98E-10 | 0.006294 |
| 13July2011 | 10482 | 664.37  | 2.821611 | 3 R.TPLVPTEI chr2@1108  | 2.41E-10 | 0.004957 |
| 13July2011 | 1869  | 456.3   | 20.93878 | 2 R.RAAAPLR Splice@chr  | 2.04E-10 | 0.004638 |
| 13July2011 | 9992  | 573.83  | 11.89294 | 2 E.SPTIMTTI chrX@1024  | 1.62E-10 | 0.003791 |
| 13July2011 | 10815 | 858.48  | 6.006088 | 3 _LETGIKPI Splice@chr  | 1.97E-12 | 0        |
| 13July2011 | 9969  | 660.37  | -16.199  | 2 K.TK+14.01 chr1@1424  | 2.90E-10 | 0.006148 |
| 13July2011 | 12431 | 876.51  | -18.0997 | 2 K.NQAIQNI chr2@9182   | 1.08E-10 | 0.002739 |
| 13July2011 | 8529  | 515.62  | 14.07456 | 3 _QNLSLFFI Splice@chr  | 2.07E-10 | 0.004638 |
| 13July2011 | 1254  | 508.27  | 7.460064 | 2 R.MIESTGL chr3@1367   | 3.25E-10 | 0.007517 |

|            |       |         |          |                          |          |          |
|------------|-------|---------|----------|--------------------------|----------|----------|
| 13July2011 | 5229  | 462.59  | 1.368923 | 3 K.RRYDYGK chr5@9435    | 2.04E-10 | 0.004638 |
| 13July2011 | 14103 | 792.15  | -18.5783 | 4 K.SGTIFDNI Splice@chr  | 6.16E-11 | 0.002076 |
| 13July2011 | 763   | 562.31  | -13.4391 | 2 R.FYLLYLYK Splice@chr  | 4.74E-11 | 0.00192  |
| 13July2011 | 3741  | 622.81  | -9.12865 | 2 K.NGRNLAI chr1@1467    | 4.93E-11 | 0.002076 |
| 13July2011 | 10765 | 664.7   | 1.197202 | 3 _PTLNK+1 chr1@6526     | 9.43E-11 | 0.002383 |
| 13July2011 | 964   | 530.76  | -26.2682 | 2 L.RADHTHF chr3@8398    | 2.59E-10 | 0.005293 |
| 13July2011 | 7682  | 456.25  | -12.6026 | 3 R.KFMRQLI chr2@4705    | 3.02E-10 | 0.006294 |
| 13July2011 | 1948  | 400.72  | -16.3384 | 2 K.LCVPGVR chr2@7704    | 2.21E-10 | 0.004796 |
| 13July2011 | 3990  | 665.02  | -27.3298 | 3 _K+14.016 chr2@9901    | 9.73E-11 | 0.002383 |
| 13July2011 | 6153  | 509.8   | -23.773  | 2 R.SSVIMLIV chr2@5767   | 2.03E-10 | 0.004638 |
| 13July2011 | 2252  | 433.76  | 2.609238 | 2 _IVDLPGPI chr3@1104    | 8.32E-11 | 0.002383 |
| 13July2011 | 2999  | 594.81  | -21.482  | 2 K.INGTEKN chrX@6958    | 7.31E-11 | 0.002239 |
| 13July2011 | 6204  | 509.8   | -23.773  | 2 R.SSVIMLIV chr2@5767   | 5.90E-11 | 0.002076 |
| 13July2011 | 10595 | 685.88  | 4.188613 | 2 K.IVPGGGA chrX@1570    | 4.53E-19 | 0        |
| 13July2011 | 1827  | 581.3   | 19.42474 | 2 K.TITTYWN Splice@chr   | 1.62E-10 | 0.003791 |
| 13July2011 | 11042 | 664.7   | 1.197202 | 3 _PTLNK+1 chr1@6526     | 3.29E-10 | 0.007517 |
| 13July2011 | 9916  | 660.87  | -18.7429 | 2 K.TK+14.01 chr1@1424   | 3.63E-10 | 0.008883 |
| 13July2011 | 1581  | 735.33  | -27.5112 | 2 K.YGHANVI chr1@1065    | 7.56E-11 | 0.002239 |
| 13July2011 | 313   | 531.28  | 8.35486  | 2 L.RADHTHF chr3@8398    | 2.52E-11 | 0.001115 |
| 13July2011 | 12918 | 902.46  | -21.5757 | 3 K.RKLEYTIS Splice@chr  | 3.78E-10 | 0.009743 |
| 13July2011 | 6367  | 997.55  | -0.48998 | 1 K.KAQKMT chr5@6757     | 9.35E-11 | 0.002383 |
| 13July2011 | 2655  | 489.3   | 10.01236 | 2 L.RTTTGISII chr5@1648  | 2.33E-10 | 0.004957 |
| 13July2011 | 11255 | 693.43  | 22.25478 | 3 R.GFTPM+ chr4@7821     | 1.71E-10 | 0.003971 |
| 13July2011 | 12288 | 876.51  | -18.0997 | 2 K.NQAIQNI chr2@9182    | 7.46E-11 | 0.002239 |
| 13July2011 | 10411 | 1134.06 | -5.36126 | 2 _IPSAVGY Splice@chr    | 8.91E-15 | 0        |
| 13July2011 | 5191  | 559.79  | 11.35993 | 2 R.DGWSIGI chr4@4255    | 1.24E-10 | 0.004686 |
| 13July2011 | 9447  | 473.92  | 1.290625 | 3 K.K+14.016 chr4@2636   | 5.11E-11 | 0.002062 |
| 13July2011 | 10668 | 1134.06 | -5.36126 | 2 _IPSAVGY Splice@chr    | 3.48E-16 | 0        |
| 13July2011 | 8171  | 673.32  | -23.1345 | 4 _QVREMH Splice@chr     | 1.59E-10 | 0.005012 |
| 13July2011 | 4371  | 791.92  | -24.3853 | 2 K.RIGLEEG chr4@1007    | 1.91E-10 | 0.006231 |
| 13July2011 | 1823  | 429.75  | -27.8303 | 2 K.KGGVASI chr5@3587    | 2.43E-10 | 0.008003 |
| 13July2011 | 5957  | 517.3   | 21.87085 | 2 R.RPAKYGV chr1@1165    | 1.25E-10 | 0.004686 |
| 13July2011 | 3964  | 523.81  | 2.334929 | 2 R.IPTTSSLIS Splice@chr | 4.68E-11 | 0.002062 |
| 13July2011 | 9543  | 596.82  | -24.2778 | 2 K.LLSKKEM chrX@6920    | 1.94E-10 | 0.006376 |
| 13July2011 | 14575 | 703.09  | -8.55154 | 3 K.LTK+14.0 chr5@3845   | 9.66E-11 | 0.004657 |
| 13July2011 | 10241 | 573.83  | 11.89294 | 2 E.SPTIMTTI chrX@1024   | 2.97E-10 | 0.009123 |
| 13July2011 | 9400  | 805.42  | -12.2158 | 2 R.QISTCKSS Splice@chr  | 9.05E-12 | 4.93E-04 |
| 13July2011 | 14766 | 792.15  | -18.5783 | 4 K.SGTIFDNI Splice@chr  | 8.49E-11 | 0.003753 |
| 13July2011 | 1607  | 597.31  | -23.5081 | 2 R.RCLAMM Splice@chr    | 1.83E-11 | 0.001336 |
| 13July2011 | 14441 | 593.34  | 22.02044 | 2 R.NSHTLPL chrX@9076    | 1.97E-10 | 0.006376 |
| 13July2011 | 15137 | 634.84  | 6.410455 | 2 R.VDIGDILF Splice@chr  | 1.70E-10 | 0.00537  |
| 13July2011 | 10365 | 691.88  | 0.618416 | 2 R.KFAFFFTI chr1@1181   | 5.77E-11 | 0.002062 |
| 13July2011 | 3113  | 489.3   | 10.01236 | 2 L.RTTTGISII chr5@1648  | 2.82E-10 | 0.008627 |
| 13July2011 | 12692 | 576.38  | 9.122915 | 2 K.KLILPHFR chr2@4900   | 1.97E-10 | 0.006376 |
| 13July2011 | 9204  | 536.33  | -14.5938 | 2 A.VLLWRLS chr3@5499    | 2.03E-10 | 0.006376 |
| 13July2011 | 11100 | 858.48  | 6.006088 | 3 _LETGIKPI Splice@chr   | 9.25E-13 | 0        |
| 13July2011 | 14985 | 823.75  | -25.3212 | 3 R.IFNFPGFI chr4@1095   | 1.62E-10 | 0.005012 |

|            |       |         |          |                         |          |          |
|------------|-------|---------|----------|-------------------------|----------|----------|
| 13July2011 | 5195  | 696.83  | -11.9803 | 2 R.TDRTESV chr1@1452   | 2.31E-10 | 0.00721  |
| 13July2011 | 2537  | 471.28  | 10.90222 | 2 R.KDEPVVV Splice@chr  | 2.27E-10 | 0.00721  |
| 13July2011 | 2455  | 400.73  | 8.70363  | 2 K.LCVPGVR chr2@7704   | 2.21E-10 | 0.006697 |
| 13July2011 | 9439  | 596.82  | -24.2778 | 2 K.LLSKKEM chrX@6920   | 6.17E-11 | 0.002212 |
| 13July2011 | 3526  | 595.31  | -24.3068 | 2 K.INGTEKN chrX@6958   | 5.14E-11 | 0.002062 |
| 16Mar2011  | 6497  | 936.48  | 27.86052 | 1 K.LNGGYEC chr2@1191   | 3.65E-10 | 0.006643 |
| 16Mar2011  | 20731 | 634.83  | -9.39461 | 2 R.VDIGDILF Splice@chr | 5.35E-13 | 0        |
| 16Mar2011  | 8084  | 434.24  | 13.9946  | 3 _RSNDQTI chr5@6378    | 4.12E-10 | 0.007835 |
| 16Mar2011  | 19095 | 665.37  | -26.6417 | 2 Q.INNK+14 Splice@chr  | 3.71E-10 | 0.00683  |
| 16Mar2011  | 22341 | 1147.24 | 4.705638 | 3 R.FQSAAIG Splice@chr  | 1.58E-16 | 0        |
| 16Mar2011  | 3110  | 562.31  | -13.4391 | 2 R.FYLLLYLK Splice@chr | 5.70E-11 | 8.92E-04 |
| 16Mar2011  | 13795 | 1075.05 | -16.1169 | 2 R.TCSK+14. chr2@1253  | 3.13E-10 | 0.005706 |
| 16Mar2011  | 22371 | 860.68  | 2.433027 | 4 R.FQSAAIG Splice@chr  | 2.56E-11 | 4.67E-04 |
| 16Mar2011  | 3751  | 510.3   | 12.8833  | 2 R.RHVAYVF chr1@1479   | 1.28E-10 | 0.001804 |
| 16Mar2011  | 21856 | 1000.5  | -25.5062 | 2 E.CLVVNLS Splice@chr  | 4.26E-11 | 5.74E-04 |
| 16Mar2011  | 13744 | 1075.05 | -16.1169 | 2 R.TCSK+14. chr2@1253  | 5.15E-10 | 0.009296 |
| 16Mar2011  | 16517 | 1056.56 | 28.0642  | 3 I.SRVEDDS Splice@chr  | 1.82E-11 | 2.40E-04 |
| 16Mar2011  | 3796  | 510.3   | 12.8833  | 2 R.RHVAYVF chr1@1479   | 1.30E-10 | 0.001804 |
| 16Mar2011  | 12794 | 851.48  | -15.2578 | 2 K.RGVRLSH chr2@2785   | 5.65E-11 | 8.92E-04 |
| 16Mar2011  | 11445 | 897.42  | -27.6753 | 3 _QVREMH Splice@chr    | 4.43E-10 | 0.007911 |
| 16Mar2011  | 20782 | 634.83  | -9.39461 | 2 R.VDIGDILF Splice@chr | 7.65E-13 | 0        |
| 16Mar2011  | 3849  | 510.3   | 12.8833  | 2 R.RHVAYVF chr1@1479   | 1.86E-10 | 0.002895 |
| 16Mar2011  | 15415 | 938.46  | 22.50833 | 2 R.ECSQSDS chr2@8876   | 2.70E-10 | 0.004755 |
| 16Mar2011  | 20836 | 634.83  | -9.39461 | 2 R.VDIGDILF Splice@chr | 2.75E-12 | 1.28E-04 |
| 16Mar2011  | 19027 | 762.81  | 21.17414 | 5 _SDNDLFE Splice@chr   | 4.77E-10 | 0.00866  |
| 16Mar2011  | 20724 | 787.88  | 12.22608 | 2 K.FWREIQN chrX@1650   | 2.81E-10 | 0.005149 |
| 16Mar2011  | 6931  | 524.28  | -11.2752 | 3 R.APFSHPL chrX@6163   | 3.20E-10 | 0.005802 |
| 16Mar2011  | 8198  | 434.24  | 13.9946  | 3 _RSNDQTI chr5@6378    | 1.33E-10 | 0.001908 |
| 16Mar2011  | 14242 | 1075.05 | -16.1169 | 2 R.TCSK+14. chr2@1253  | 3.42E-10 | 0.009813 |
| 16Mar2011  | 12163 | 1075.05 | -16.1169 | 2 R.TCSK+14. chr2@1253  | 1.71E-10 | 0.00497  |
| 16Mar2011  | 11183 | 509.3   | -20.473  | 2 R.SSVIMLIV chr2@5767  | 8.71E-11 | 0.003166 |
| 16Mar2011  | 3387  | 562.31  | -13.4391 | 2 R.FYLLLYLK Splice@chr | 6.26E-11 | 0.002221 |
| 16Mar2011  | 20250 | 1007.86 | 15.19559 | 3 R.CWNRRA Splice@chr   | 6.97E-13 | 0        |
| 16Mar2011  | 14189 | 1075.05 | -16.1169 | 2 R.TCSK+14. chr2@1253  | 2.35E-10 | 0.006403 |
| 16Mar2011  | 12217 | 1075.05 | -16.1169 | 2 R.TCSK+14. chr2@1253  | 2.04E-10 | 0.005488 |
| 16Mar2011  | 2893  | 452.23  | -1.48793 | 2 R.SGEPLSA Splice@chr  | 3.17E-11 | 0.001365 |
| 16Mar2011  | 13515 | 748.73  | -12.625  | 3 R.LPSKENL chr4@5639   | 2.55E-10 | 0.007424 |
| 16Mar2011  | 3033  | 452.23  | -1.48793 | 2 R.SGEPLSA Splice@chr  | 2.24E-11 | 9.72E-04 |
| 16Mar2011  | 13205 | 671.37  | -24.0361 | 2 T.FNIVHTQ Splice@chr  | 3.42E-10 | 0.009813 |
| 16Mar2011  | 4192  | 510.3   | 12.8833  | 2 R.RHVAYVF chr1@1479   | 6.40E-11 | 0.002221 |
| 16Mar2011  | 8026  | 693.87  | -6.6949  | 2 V.ICVAVGD chr5@1063   | 3.74E-11 | 0.001482 |
| 16Mar2011  | 13808 | 748.72  | -26.0118 | 3 R.LPSKENL chr4@5639   | 1.65E-10 | 0.004747 |
| 16Mar2011  | 6744  | 936.48  | 27.86052 | 1 K.LNGGYEC chr2@1191   | 2.24E-11 | 9.72E-04 |
| 16Mar2011  | 14124 | 1128.02 | -19.6934 | 2 G.SEDQKST Splice@chr  | 1.22E-10 | 0.003725 |
| 16Mar2011  | 4285  | 510.3   | 12.8833  | 2 R.RHVAYVF chr1@1479   | 1.36E-10 | 0.004065 |
| 16Mar2011  | 21136 | 730.93  | -11.0855 | 2 _FFHKVK+ chr5@2007    | 2.53E-10 | 0.007424 |
| 16Mar2011  | 2986  | 452.23  | -1.48793 | 2 R.SGEPLSA Splice@chr  | 1.49E-11 | 7.21E-04 |

|           |       |         |          |                         |          |          |
|-----------|-------|---------|----------|-------------------------|----------|----------|
| 16Mar2011 | 11070 | 509.3   | -20.473  | 2 R.SSVIMLIV chr2@5767  | 2.32E-10 | 0.006403 |
| 16Mar2011 | 6839  | 936.48  | 27.86052 | 1 K.LNGGYEC chr2@1191   | 5.12E-11 | 0.001975 |
| 16Mar2011 | 22713 | 1147.24 | 4.705638 | 3 R.FQSAAIG Splice@chr  | 2.46E-15 | 0        |
| 16Mar2011 | 22718 | 860.69  | 14.08015 | 4 R.FQSAAIG Splice@chr  | 7.89E-11 | 0.002821 |
| 16Mar2011 | 13150 | 671.37  | -24.0361 | 2 T.FNIVHTQ Splice@chr  | 2.21E-10 | 0.005831 |
| 16Mar2011 | 2856  | 452.23  | -1.48793 | 2 R.SGEPLSA: Splice@chr | 2.24E-11 | 9.72E-04 |
| 16Mar2011 | 17565 | 739.41  | 16.08971 | 2 R.DQNFWK chr1@7265    | 3.17E-10 | 0.009401 |
| 16Mar2011 | 13747 | 748.72  | -26.0118 | 3 R.LPSKENL chr4@5639   | 2.38E-10 | 0.006403 |
| 16Mar2011 | 3440  | 562.31  | -13.4391 | 2 R.FYLLYLYK Splice@chr | 6.04E-11 | 0.002101 |
| 16Mar2011 | 16164 | 622.33  | 9.587405 | 2 R.AK+14.01 chr2@4270  | 2.09E-10 | 0.005488 |
| 16Mar2011 | 13081 | 851.48  | -15.2578 | 2 K.RGVRLSH chr2@2785   | 5.37E-11 | 0.001975 |
| 16Mar2011 | 8369  | 434.24  | 13.9946  | 3 _RSNDQTI chr5@6378    | 2.38E-10 | 0.006403 |
| 16Mar2011 | 8371  | 584.69  | -9.76929 | 5 _TVFYGDL chr4@5567    | 2.17E-10 | 0.005831 |
| 16Mar2011 | 11123 | 509.3   | -20.473  | 2 R.SSVIMLIV chr2@5767  | 3.17E-10 | 0.009401 |
| 16Mar2011 | 21068 | 634.84  | 6.410455 | 2 R.VDIGDILF Splice@chr | 2.71E-12 | 0        |
| 16Mar2011 | 16066 | 622.33  | 9.587405 | 2 R.AK+14.01 chr2@4270  | 2.55E-10 | 0.007424 |
| 16Mar2011 | 19567 | 849.41  | -3.23735 | 2 Q.DSSYFVE Splice@chr  | 1.24E-11 | 7.21E-04 |
| 16Mar2011 | 16694 | 792.67  | 25.51992 | 4 I.SRVEDDS: Splice@chr | 3.53E-10 | 0.009911 |
| 16Mar2011 | 3083  | 452.23  | -1.48793 | 2 R.SGEPLSA: Splice@chr | 3.15E-10 | 0.009401 |
| 16Mar2011 | 4240  | 510.3   | 12.8833  | 2 R.RHVAYVF chr1@1479   | 6.54E-12 | 3.09E-04 |
| 16Mar2011 | 2939  | 452.23  | -1.48793 | 2 R.SGEPLSA: Splice@chr | 2.76E-11 | 9.72E-04 |
| 16Mar2011 | 19787 | 1003.18 | 7.145987 | 3 R.CWNRRA Splice@chr   | 1.59E-11 | 7.21E-04 |
| 16Mar2011 | 21787 | 1103.6  | -16.1424 | 2 R.LFK+14.0 chr2@4315  | 3.47E-10 | 0.009911 |
| 16Mar2011 | 14013 | 859.14  | 2.870693 | 3 _LRFKDNC chrX@1053    | 3.99E-11 | 0.001482 |
| 16Mar2011 | 3174  | 510.3   | 12.8833  | 2 R.RHVAYVF chr1@1479   | 1.35E-10 | 0.003921 |
| 16Mar2011 | 14436 | 622.33  | 9.587405 | 2 R.AK+14.01 chr2@4270  | 8.15E-11 | 0.002459 |
| 16Mar2011 | 10975 | 626.3   | -9.76097 | 2 K.SEELMYN Splice@chr  | 9.53E-14 | 0        |
| 16Mar2011 | 19483 | 1147.24 | 4.705638 | 3 R.FQSAAIG Splice@chr  | 4.39E-14 | 0        |
| 16Mar2011 | 2448  | 915.47  | 1.201399 | 1 K.FHEIGGQ chrX@4727   | 1.32E-10 | 0.003921 |
| 16Mar2011 | 5567  | 741.38  | -23.1647 | 2 K.FPENRHI chr2@1477   | 4.71E-10 | 0.009422 |
| 16Mar2011 | 5458  | 741.38  | -23.1647 | 2 K.FPENRHI chr2@1477   | 3.21E-10 | 0.006626 |
| 16Mar2011 | 17680 | 593.34  | 22.02044 | 2 R.NSHTLPL chrX@9076   | 1.25E-10 | 0.003578 |
| 16Mar2011 | 17469 | 1003.18 | 7.145987 | 3 R.CWNRRA Splice@chr   | 5.79E-12 | 0        |
| 16Mar2011 | 7176  | 434.24  | 13.9946  | 3 _RSNDQTI chr5@6378    | 1.16E-10 | 0.003578 |
| 16Mar2011 | 5831  | 936.48  | 27.86052 | 1 K.LNGGYEC chr2@1191   | 1.96E-11 | 0.001031 |
| 16Mar2011 | 5411  | 531.29  | -6.73762 | 2 K.MPMGV chr2@6727     | 4.51E-10 | 0.00891  |
| 16Mar2011 | 18372 | 634.83  | -9.39461 | 2 R.VDIGDILF Splice@chr | 6.84E-13 | 0        |
| 16Mar2011 | 18331 | 634.83  | -9.39461 | 2 R.VDIGDILF Splice@chr | 2.80E-12 | 0        |
| 16Mar2011 | 2997  | 498.58  | 26.57833 | 3 R.SQYLQM Splice@chr   | 1.93E-11 | 0.001031 |
| 16Mar2011 | 3227  | 510.3   | 12.8833  | 2 R.RHVAYVF chr1@1479   | 1.23E-10 | 0.003578 |
| 16Mar2011 | 5782  | 936.48  | 27.86052 | 1 K.LNGGYEC chr2@1191   | 4.44E-11 | 0.00115  |
| 16Mar2011 | 17717 | 873.47  | 13.68595 | 2 R.SIFVDLEP Splice@chr | 1.86E-10 | 0.004881 |
| 16Mar2011 | 3122  | 510.3   | 12.8833  | 2 R.RHVAYVF chr1@1479   | 1.23E-10 | 0.003578 |
| 16Mar2011 | 8439  | 599.95  | -5.74262 | 3 R.NAEAA: Splice@chr   | 9.76E-14 | 0        |
| 16Mar2011 | 3630  | 510.3   | 12.8833  | 2 R.RHVAYVF chr1@1479   | 7.05E-11 | 0.001753 |
| 16Mar2011 | 17170 | 634.83  | -9.39461 | 2 R.VDIGDILF Splice@chr | 4.44E-13 | 0        |
| 16Mar2011 | 5246  | 741.38  | -23.1647 | 2 K.FPENRHI chr2@1477   | 4.67E-10 | 0.00899  |

|           |       |         |          |                         |          |          |
|-----------|-------|---------|----------|-------------------------|----------|----------|
| 16Mar2011 | 3566  | 510.3   | 12.8833  | 2 R.RHVAYVF chr1@1479   | 1.65E-10 | 0.00432  |
| 16Mar2011 | 3508  | 510.3   | 12.8833  | 2 R.RHVAYVF chr1@1479   | 1.30E-10 | 0.003726 |
| 16Mar2011 | 13782 | 622.33  | 9.587405 | 2 R.AK+14.01 chr2@4270  | 3.13E-10 | 0.006927 |
| 16Mar2011 | 4156  | 536.29  | -10.9462 | 2 _QVEFNPII Splice@chr  | 1.03E-10 | 0.002878 |
| 16Mar2011 | 5614  | 936.48  | 27.86052 | 1 K.LNGGYEC chr2@1191   | 1.11E-10 | 0.003135 |
| 16Mar2011 | 3454  | 510.3   | 12.8833  | 2 R.RHVAYVF chr1@1479   | 1.42E-10 | 0.003831 |
| 16Mar2011 | 16332 | 953.26  | 20.59712 | 4 _SDNDLFE Splice@chr   | 2.01E-10 | 0.004978 |
| 16Mar2011 | 10343 | 1075.05 | -16.1169 | 2 R.TCSK+14. chr2@1253  | 1.34E-10 | 0.003726 |
| 16Mar2011 | 17206 | 634.83  | -9.39461 | 2 R.VDIGDILF Splice@chr | 7.56E-13 | 0        |
| 16Mar2011 | 5191  | 741.38  | -23.1647 | 2 K.FPENRHI, chr2@1477  | 2.75E-10 | 0.006136 |
| 16Mar2011 | 6563  | 693.86  | -21.1418 | 2 V.ICVAVGD chr5@1063   | 2.45E-10 | 0.005668 |
| 16Mar2011 | 10469 | 626.3   | -9.76097 | 2 K.SEELMYN chr4@2673   | 6.66E-14 | 0        |
| 16Mar2011 | 4212  | 536.29  | -10.9462 | 2 _QVEFNPII Splice@chr  | 8.09E-11 | 0.002129 |
| 16Mar2011 | 3354  | 510.3   | 12.8833  | 2 R.RHVAYVF chr1@1479   | 1.21E-10 | 0.00362  |
| 16Mar2011 | 4108  | 536.79  | -14.0798 | 2 _QVEFNPII Splice@chr  | 2.02E-11 | 7.12E-04 |
| 16Mar2011 | 6679  | 434.24  | 13.9946  | 3 _RSNDQTI chr5@6378    | 1.17E-10 | 0.00362  |
| 16Mar2011 | 3403  | 510.3   | 12.8833  | 2 R.RHVAYVF chr1@1479   | 1.31E-11 | 4.45E-04 |
| 16Mar2011 | 6108  | 626.3   | -9.76097 | 2 R.LCESGAA Splice@chr  | 3.00E-16 | 0        |
| 16Mar2011 | 18072 | 634.83  | -9.39461 | 2 R.VDIGDILF Splice@chr | 1.30E-12 | 0        |
| 16Mar2011 | 5514  | 741.38  | -23.1647 | 2 K.FPENRHI, chr2@1477  | 4.74E-10 | 0.009945 |
| 16Mar2011 | 14204 | 622.33  | 9.587405 | 2 R.AK+14.01 chr2@4270  | 4.48E-10 | 0.009375 |
| 16Mar2011 | 3235  | 510.3   | 12.8833  | 2 R.RHVAYVF chr1@1479   | 6.54E-12 | 3.33E-04 |
| 16Mar2011 | 5622  | 741.38  | -23.1647 | 2 K.FPENRHI, chr2@1477  | 3.40E-10 | 0.007802 |
| 16Mar2011 | 5565  | 741.38  | -23.1647 | 2 K.FPENRHI, chr2@1477  | 3.93E-10 | 0.008479 |
| 16Mar2011 | 5833  | 936.48  | 27.86052 | 1 K.LNGGYEC chr2@1191   | 4.03E-11 | 0.001766 |
| 16Mar2011 | 3340  | 510.3   | 12.8833  | 2 R.RHVAYVF chr1@1479   | 2.56E-10 | 0.005784 |
| 16Mar2011 | 16903 | 665.37  | -26.6417 | 2 Q.INNK+14 Splice@chr  | 1.70E-10 | 0.004627 |
| 16Mar2011 | 10787 | 1075.05 | -16.1169 | 2 R.TCSK+14. chr2@1253  | 2.57E-10 | 0.005784 |
| 16Mar2011 | 18106 | 634.84  | 6.410455 | 2 R.VDIGDILF Splice@chr | 8.20E-13 | 0        |
| 16Mar2011 | 15773 | 722.45  | -4.95112 | 2 R.RK+14.01 Splice@chr | 1.61E-10 | 0.004627 |
| 16Mar2011 | 6056  | 626.3   | -9.76097 | 2 R.LCESGAA Splice@chr  | 1.33E-16 | 0        |
| 16Mar2011 | 3283  | 510.3   | 12.8833  | 2 R.RHVAYVF chr1@1479   | 6.40E-11 | 0.002571 |
| 16Mar2011 | 2374  | 915.47  | 1.201399 | 1 K.FHEIGGQ chrX@4727   | 1.00E-10 | 0.003053 |
| 16Mar2011 | 15728 | 665.37  | -26.6417 | 2 Q.INNK+14 Splice@chr  | 3.24E-10 | 0.008426 |
| 16Mar2011 | 11435 | 1075.05 | -16.1169 | 2 R.TCSK+14. chr2@1253  | 2.52E-10 | 0.006286 |
| 16Mar2011 | 4708  | 741.38  | -23.1647 | 2 K.FPENRHI, chr2@1477  | 1.50E-10 | 0.004538 |
| 16Mar2011 | 16417 | 1007.86 | 15.19559 | 3 R.CWNRRA Splice@chr   | 1.28E-11 | 8.34E-04 |
| 16Mar2011 | 3494  | 510.3   | 12.8833  | 2 R.RHVAYVF chr1@1479   | 1.31E-11 | 8.34E-04 |
| 16Mar2011 | 5092  | 936.48  | 27.86052 | 1 K.LNGGYEC chr2@1191   | 5.32E-11 | 0.001994 |
| 16Mar2011 | 4766  | 741.38  | -23.1647 | 2 K.FPENRHI, chr2@1477  | 1.92E-10 | 0.005852 |
| 16Mar2011 | 3336  | 510.3   | 12.8833  | 2 R.RHVAYVF chr1@1479   | 1.31E-10 | 0.003731 |
| 16Mar2011 | 9816  | 1075.05 | -16.1169 | 2 R.TCSK+14. chr2@1253  | 5.22E-11 | 0.001994 |
| 16Mar2011 | 3550  | 510.3   | 12.8833  | 2 R.RHVAYVF chr1@1479   | 7.05E-11 | 0.002669 |
| 16Mar2011 | 5298  | 626.3   | -9.76097 | 2 R.LCESGAA Splice@chr  | 3.60E-16 | 0        |
| 16Mar2011 | 16055 | 1003.18 | 7.145987 | 3 R.CWNRRA Splice@chr   | 4.52E-13 | 0        |
| 16Mar2011 | 13889 | 1056.87 | 4.800118 | 3 I.SRVEDDS Splice@chr  | 2.99E-10 | 0.007943 |
| 16Mar2011 | 3389  | 510.3   | 12.8833  | 2 R.RHVAYVF chr1@1479   | 1.91E-10 | 0.005729 |

|           |       |         |          |                          |          |          |
|-----------|-------|---------|----------|--------------------------|----------|----------|
| 16Mar2011 | 3442  | 510.3   | 12.8833  | 2 R.RHVAYVF chr1@1479    | 6.54E-12 | 1.81E-04 |
| 16Mar2011 | 5079  | 741.89  | -19.4947 | 2 K.QKSNWH chr5@1229     | 3.50E-11 | 0.001266 |
| 16Mar2011 | 16979 | 634.84  | 6.410455 | 2 R.VDIGDILF Splice@chr  | 1.12E-12 | 0        |
| 16Mar2011 | 3233  | 510.3   | 12.8833  | 2 R.RHVAYVF chr1@1479    | 2.60E-10 | 0.006405 |
| 16Mar2011 | 5025  | 741.39  | -17.2291 | 2 K.QKSNWH chr5@1229     | 2.31E-11 | 0.00112  |
| 16Mar2011 | 5244  | 626.3   | -9.76097 | 2 R.LCESGAA Splice@chr   | 4.00E-16 | 0        |
| 16Mar2011 | 3283  | 510.3   | 12.8833  | 2 R.RHVAYVF chr1@1479    | 2.63E-10 | 0.006405 |
| 16Mar2011 | 18892 | 760.4   | -4.0463  | 3 _.TQTNTKI\ chrX@7978   | 1.42E-10 | 0.004268 |
| 16Mar2011 | 4829  | 741.38  | -23.1647 | 2 K.FPENRHI\ chr2@1477   | 1.55E-10 | 0.004808 |
| 16Mar2011 | 20395 | 1129.08 | -25.7371 | 2 S.PPK+14.0 chrX@7427   | 2.40E-10 | 0.005418 |
| 16Mar2011 | 15809 | 622.33  | 9.587405 | 2 R.AK+14.01 chr2@4270   | 9.91E-11 | 0.001932 |
| 16Mar2011 | 15187 | 762.42  | 3.25006  | 2 _.MK+14.0 chr4@7749    | 5.23E-11 | 0.00125  |
| 16Mar2011 | 6048  | 741.38  | -23.1647 | 2 K.FPENRHI\ chr2@1477   | 2.88E-10 | 0.006169 |
| 16Mar2011 | 10612 | 509.3   | -20.473  | 2 R.SSVIMLIV chr2@5767   | 1.86E-10 | 0.004275 |
| 16Mar2011 | 10665 | 509.3   | -20.473  | 2 R.SSVIMLIV chr2@5767   | 2.75E-10 | 0.00553  |
| 16Mar2011 | 8006  | 434.24  | 13.9946  | 3 _.RSNDQTI\ chr5@6378   | 4.42E-10 | 0.009436 |
| 16Mar2011 | 2713  | 452.23  | -1.48793 | 2 R.SGEPLSA\ Splice@chr  | 3.45E-10 | 0.007319 |
| 16Mar2011 | 20432 | 1129.08 | -25.7371 | 2 S.PPK+14.0 chrX@7427   | 1.86E-10 | 0.004275 |
| 16Mar2011 | 6104  | 741.38  | -23.1647 | 2 K.FPENRHI\ chr2@1477   | 2.53E-10 | 0.005418 |
| 16Mar2011 | 19660 | 593.34  | 22.02044 | 2 R.NSHTLPL chrX@9076    | 7.06E-11 | 0.001379 |
| 16Mar2011 | 2767  | 452.23  | -1.48793 | 2 R.SGEPLSA\ Splice@chr  | 1.77E-11 | 6.72E-04 |
| 16Mar2011 | 16687 | 1056.22 | 29.33653 | 3 R.TTGVVLD Splice@chr   | 9.92E-13 | 0        |
| 16Mar2011 | 3148  | 562.31  | -13.4391 | 2 R.FYLLLYLK Splice@chr  | 4.72E-11 | 0.001106 |
| 16Mar2011 | 2670  | 452.23  | -1.48793 | 2 R.SGEPLSA\ Splice@chr  | 2.67E-10 | 0.00553  |
| 16Mar2011 | 10722 | 509.3   | -20.473  | 2 R.SSVIMLIV chr2@5767   | 1.27E-10 | 0.002786 |
| 16Mar2011 | 12544 | 583.82  | -28.5596 | 2 R.LVPITFS chr1@2422    | 2.95E-10 | 0.006169 |
| 16Mar2011 | 13241 | 748.72  | -26.0118 | 3 R.LPSKENL\ chr4@5639   | 1.15E-10 | 0.002073 |
| 16Mar2011 | 15754 | 622.33  | 9.587405 | 2 R.AK+14.01 chr2@4270   | 3.29E-10 | 0.007066 |
| 16Mar2011 | 10782 | 509.3   | -20.473  | 2 R.SSVIMLIV chr2@5767   | 3.24E-10 | 0.006942 |
| 16Mar2011 | 5046  | 536.29  | -10.9462 | 2 _.QVEFNPI\ Splice@chr  | 1.08E-11 | 5.32E-04 |
| 16Mar2011 | 4296  | 510.3   | 12.8833  | 2 R.RHVAYVF chr1@1479    | 1.23E-10 | 0.005983 |
| 16Mar2011 | 2784  | 452.23  | -1.48793 | 2 R.SGEPLSA\ Splice@chr  | 2.01E-11 | 6.78E-04 |
| 16Mar2011 | 15219 | 858.48  | 6.006088 | 3 _.LETGIKPI\ Splice@chr | 1.93E-12 | 1.94E-04 |
| 16Mar2011 | 10225 | 400.75  | 5.038673 | 2 K.VEAAVAI\ Splice@chr  | 1.56E-10 | 0.006752 |
| 16Mar2011 | 3418  | 562.31  | -13.4391 | 2 R.FYLLLYLK Splice@chr  | 5.62E-11 | 0.00301  |
| 16Mar2011 | 16280 | 965.76  | 6.091444 | 4 R.K+14.016 chr5@2089   | 1.50E-10 | 0.006473 |
| 16Mar2011 | 5100  | 536.29  | -10.9462 | 2 _.QVEFNPI\ Splice@chr  | 1.84E-10 | 0.007956 |
| 16Mar2011 | 13849 | 1075.05 | -16.1169 | 2 R.TCSK+14. chr2@1253   | 2.14E-10 | 0.009015 |
| 16Mar2011 | 15276 | 858.48  | 6.006088 | 3 _.LETGIKPI\ Splice@chr | 5.03E-13 | 0        |
| 16Mar2011 | 16174 | 1182.56 | -21.0399 | 1 R.RFAENQI\ chr5@1779   | 9.60E-11 | 0.005028 |
| 16Mar2011 | 15868 | 622.33  | 9.587405 | 2 R.AK+14.01 chr2@4270   | 1.51E-10 | 0.006473 |
| 16Mar2011 | 19575 | 593.34  | 22.02044 | 2 R.NSHTLPL chrX@9076    | 1.23E-10 | 0.005983 |
| 16Mar2011 | 3475  | 562.31  | -13.4391 | 2 R.FYLLLYLK Splice@chr  | 1.11E-10 | 0.005431 |
| 16Mar2011 | 12014 | 1075.05 | -16.1169 | 2 R.TCSK+14. chr2@1253   | 1.95E-10 | 0.008074 |
| 16Mar2011 | 10952 | 509.8   | -23.773  | 2 R.SSVIMLIV chr2@5767   | 3.76E-11 | 0.001949 |
| 16Mar2011 | 11011 | 509.8   | -23.773  | 2 R.SSVIMLIV chr2@5767   | 5.20E-11 | 0.002861 |
| 16Mar2011 | 4351  | 510.3   | 12.8833  | 2 R.RHVAYVF chr1@1479    | 1.21E-10 | 0.005983 |

|           |       |         |          |                         |          |          |
|-----------|-------|---------|----------|-------------------------|----------|----------|
| 16Mar2011 | 10925 | 1017.59 | -22.5744 | 1 R.SSVIMLIV chr2@5767  | 5.88E-11 | 0.003149 |
| 16Mar2011 | 2833  | 452.23  | -1.48793 | 2 R.SGEPLSA' Splice@chr | 1.26E-11 | 5.32E-04 |
| 16Mar2011 | 8167  | 434.24  | 13.9946  | 3 _RSNDQTI chr5@6378    | 1.10E-10 | 0.005292 |
| 16Mar2011 | 13449 | 833.91  | -7.14778 | 2 _IDM+15.5 chrX@3237   | 1.07E-10 | 0.005292 |
| 16Mar2011 | 17252 | 738.9   | 4.880241 | 2 R.DQNFWK chr1@7263    | 1.40E-10 | 0.006202 |
| 16Mar2011 | 3363  | 562.31  | -13.4391 | 2 R.FYLLYLYK Splice@chr | 7.10E-11 | 0.003737 |
| 16Mar2011 | 15927 | 622.33  | 9.587405 | 2 R.AK+14.01 chr2@4270  | 1.76E-10 | 0.007715 |
| 16Mar2011 | 4410  | 510.3   | 12.8833  | 2 R.RHVAYVF chr1@1479   | 6.54E-12 | 3.65E-04 |
| 16Mar2011 | 6040  | 439.75  | -7.44254 | 2 K.LYGEVGL chrX@2908   | 1.14E-10 | 0.005572 |
| 16Mar2011 | 12067 | 1075.05 | -16.1169 | 2 R.TCSK+14. chr2@1253  | 1.68E-10 | 0.007141 |
| 16Mar2011 | 6569  | 936.48  | 27.86052 | 1 K.LNGGYEC chr2@1191   | 4.06E-11 | 0.001949 |
| 16Mar2011 | 15770 | 894.49  | -25.3218 | 2 _VETGIKP Splice@chr   | 4.08E-12 | 1.94E-04 |
| 16Mar2011 | 15821 | 894.49  | -25.3218 | 2 _VETGIKP Splice@chr   | 5.78E-12 | 3.65E-04 |
| 16Mar2011 | 6355  | 741.38  | -23.1647 | 2 K.FPENRHI, chr2@1477  | 2.30E-10 | 0.009935 |
| 16Mar2011 | 4244  | 510.3   | 12.8833  | 2 R.RHVAYVF chr1@1479   | 1.33E-10 | 0.006202 |
| 16Mar2011 | 10897 | 509.8   | -23.773  | 2 R.SSVIMLIV chr2@5767  | 2.16E-10 | 0.009151 |
| 16Mar2011 | 11045 | 509.3   | -20.473  | 2 R.SSVIMLIV chr2@5767  | 2.31E-10 | 0.008912 |
| 16Mar2011 | 10527 | 571.86  | -2.35222 | 2 T.KKGDIVEI chr5@1238  | 2.38E-10 | 0.009535 |
| 16Mar2011 | 21233 | 634.83  | -9.39461 | 2 R.VDIGDILF Splice@chr | 1.95E-12 | 0        |
| 16Mar2011 | 15470 | 858.47  | -5.67211 | 3 _LETGIKPI Splice@chr  | 1.55E-12 | 0        |
| 16Mar2011 | 20454 | 1007.85 | 5.172966 | 3 R.CWNRRA Splice@chr   | 6.30E-11 | 0.002275 |
| 16Mar2011 | 12048 | 1075.05 | -16.1169 | 2 R.TCSK+14. chr2@1253  | 1.04E-10 | 0.003839 |
| 16Mar2011 | 10991 | 509.3   | -20.473  | 2 R.SSVIMLIV chr2@5767  | 7.35E-11 | 0.002391 |
| 16Mar2011 | 16391 | 1182.56 | -21.0399 | 1 R.RFAENQI chr5@1779   | 6.45E-11 | 0.002275 |
| 16Mar2011 | 24135 | 790.41  | -28.718  | 1 R.VGVEMV chr1@1372    | 1.26E-10 | 0.004814 |
| 16Mar2011 | 6617  | 936.48  | 27.86052 | 1 K.LNGGYEC chr2@1191   | 1.77E-11 | 5.19E-04 |
| 16Mar2011 | 12102 | 1075.05 | -16.1169 | 2 R.TCSK+14. chr2@1253  | 2.36E-10 | 0.00923  |
| 16Mar2011 | 18679 | 732.07  | 19.51873 | 3 R.ATDDWII Splice@chr  | 2.34E-10 | 0.009123 |
| 16Mar2011 | 15525 | 858.47  | -5.67211 | 3 _LETGIKPI Splice@chr  | 1.28E-11 | 3.98E-04 |
| 16Mar2011 | 1010  | 549.29  | -19.7752 | 2 K.FRVQYQC Splice@chr  | 2.27E-10 | 0.008699 |
| 16Mar2011 | 11099 | 509.3   | -20.473  | 2 R.SSVIMLIV chr2@5767  | 1.78E-10 | 0.006607 |
| 16Mar2011 | 16071 | 622.33  | 9.587405 | 2 R.AK+14.01 chr2@4270  | 1.92E-10 | 0.007316 |
| 16Mar2011 | 3739  | 510.3   | 12.8833  | 2 R.RHVAYVF chr1@1479   | 1.23E-10 | 0.004707 |
| 16Mar2011 | 8106  | 434.24  | 13.9946  | 3 _RSNDQTI chr5@6378    | 1.40E-10 | 0.005343 |
| 16Mar2011 | 3848  | 510.3   | 12.8833  | 2 R.RHVAYVF chr1@1479   | 1.28E-10 | 0.004814 |
| 16Mar2011 | 3695  | 510.3   | 12.8833  | 2 R.RHVAYVF chr1@1479   | 6.54E-12 | 1.39E-04 |
| 16Mar2011 | 3789  | 510.3   | 12.8833  | 2 R.RHVAYVF chr1@1479   | 1.30E-10 | 0.005023 |
| 16Mar2011 | 6569  | 936.48  | 27.86052 | 1 K.LNGGYEC chr2@1191   | 1.75E-11 | 5.19E-04 |
| 16Mar2011 | 4840  | 536.29  | -10.9462 | 2 _QVEFNPII Splice@chr  | 5.03E-11 | 0.001668 |
| 16Mar2011 | 6035  | 741.38  | -23.1647 | 2 K.FPENRHI, chr2@1477  | 3.52E-10 | 0.009714 |
| 16Mar2011 | 3946  | 510.3   | 12.8833  | 2 R.RHVAYVF chr1@1479   | 1.28E-10 | 0.004226 |
| 16Mar2011 | 11734 | 1075.05 | -16.1169 | 2 R.TCSK+14. chr2@1253  | 3.32E-10 | 0.009428 |
| 16Mar2011 | 22130 | 1147.24 | 4.705638 | 3 R.FQSAAIG Splice@chr  | 3.36E-16 | 0        |
| 16Mar2011 | 15179 | 938.46  | 22.50833 | 2 R.ECSQSDS chr2@8876   | 3.57E-10 | 0.009801 |
| 16Mar2011 | 7476  | 693.86  | -21.1418 | 2 V.ICVAVGD chr5@1063   | 2.06E-10 | 0.006432 |
| 16Mar2011 | 7862  | 434.24  | 13.9946  | 3 _RSNDQTI chr5@6378    | 2.72E-11 | 7.45E-04 |
| 16Mar2011 | 15019 | 858.47  | -5.67211 | 3 _LETGIKPI Splice@chr  | 3.60E-12 | 0        |

|           |       |         |          |                         |          |          |
|-----------|-------|---------|----------|-------------------------|----------|----------|
| 16Mar2011 | 2966  | 915.47  | 1.201399 | 1 K.FHEIGGQ chrX@4727   | 1.32E-10 | 0.00429  |
| 16Mar2011 | 22109 | 1147.25 | 13.44098 | 3 R.FQSAAIG Splice@chr  | 7.25E-16 | 0        |
| 16Mar2011 | 15088 | 762.42  | 3.25006  | 2 _MK+14.0 chr4@7749    | 1.26E-10 | 0.004226 |
| 16Mar2011 | 15629 | 622.33  | 9.587405 | 2 R.AK+14.01 chr2@4270  | 3.09E-10 | 0.008959 |
| 16Mar2011 | 6147  | 741.38  | -23.1647 | 2 K.FPENRHI chr2@1477   | 1.93E-10 | 0.006135 |
| 16Mar2011 | 17164 | 738.9   | 4.880241 | 2 R.DQNFWK chr1@7263    | 5.59E-11 | 0.002131 |
| 16Mar2011 | 6089  | 741.38  | -23.1647 | 2 K.FPENRHI chr2@1477   | 2.59E-10 | 0.007901 |
| 16Mar2011 | 3788  | 510.3   | 12.8833  | 2 R.RHVAYVF chr1@1479   | 1.33E-10 | 0.00429  |
| 16Mar2011 | 3843  | 510.3   | 12.8833  | 2 R.RHVAYVF chr1@1479   | 1.38E-10 | 0.00429  |
| 16Mar2011 | 3897  | 510.3   | 12.8833  | 2 R.RHVAYVF chr1@1479   | 1.84E-10 | 0.005952 |
| 16Mar2011 | 7525  | 693.86  | -21.1418 | 2 V.ICVAVGD chr5@1063   | 2.04E-11 | 7.45E-04 |
| 16Mar2011 | 6450  | 936.48  | 27.86052 | 1 K.LNGGYEC chr2@1191   | 3.20E-11 | 9.84E-04 |
| 16Mar2011 | 13563 | 1075.05 | -16.1169 | 2 R.TCSK+14. chr2@1253  | 2.81E-10 | 0.008275 |
| 16Mar2011 | 19575 | 593.34  | 22.02044 | 2 R.NSHTLPL chrX@9076   | 1.16E-10 | 0.004024 |
| 16Mar2011 | 11681 | 1075.05 | -16.1169 | 2 R.TCSK+14. chr2@1253  | 6.66E-11 | 0.002339 |
| 16Mar2011 | 11799 | 1075.05 | -16.1169 | 2 R.TCSK+14. chr2@1253  | 2.71E-10 | 0.008275 |
| 16Mar2011 | 11898 | 622.33  | 9.587405 | 2 R.AK+14.01 chr2@4270  | 1.92E-10 | 0.005905 |
| 16Mar2011 | 14883 | 634.84  | 6.410455 | 2 R.VDIGDILF Splice@chr | 1.04E-11 | 7.60E-04 |
| 16Mar2011 | 2244  | 498.58  | 26.57833 | 3 R.SQYLQM Splice@chr   | 1.96E-10 | 0.005905 |
| 16Mar2011 | 4411  | 741.38  | -23.1647 | 2 K.FPENRHI chr2@1477   | 2.20E-10 | 0.006194 |
| 16Mar2011 | 2441  | 510.3   | 12.8833  | 2 R.RHVAYVF chr1@1479   | 1.23E-10 | 0.004404 |
| 16Mar2011 | 2286  | 498.58  | 26.57833 | 3 R.SQYLQM Splice@chr   | 2.79E-10 | 0.007382 |
| 16Mar2011 | 11742 | 516.3   | 4.106203 | 3 R.NIIFLMVI chrX@1294  | 1.73E-10 | 0.005288 |
| 16Mar2011 | 2554  | 510.3   | 12.8833  | 2 R.RHVAYVF chr1@1479   | 2.91E-11 | 9.34E-04 |
| 16Mar2011 | 8140  | 509.8   | -23.773  | 2 R.SSVIMLI chr2@5767   | 1.68E-10 | 0.004973 |
| 16Mar2011 | 14852 | 634.84  | 6.410455 | 2 R.VDIGDILF Splice@chr | 1.55E-12 | 2.36E-04 |
| 16Mar2011 | 14010 | 665.37  | -26.6417 | 2 Q.INNK+14 Splice@chr  | 3.62E-10 | 0.008503 |
| 16Mar2011 | 2497  | 510.3   | 12.8833  | 2 R.RHVAYVF chr1@1479   | 1.23E-10 | 0.004404 |
| 16Mar2011 | 9121  | 1075.05 | -16.1169 | 2 R.TCSK+14. chr2@1253  | 2.12E-10 | 0.002866 |
| 16Mar2011 | 16863 | 1147.25 | 13.44098 | 3 R.FQSAAIG Splice@chr  | 5.17E-13 | 0        |
| 16Mar2011 | 15831 | 634.84  | 6.410455 | 2 R.VDIGDILF Splice@chr | 8.61E-12 | 0        |
| 16Mar2011 | 3536  | 510.3   | 12.8833  | 2 R.RHVAYVF chr1@1479   | 1.61E-10 | 0.002464 |
| 16Mar2011 | 4387  | 741.38  | -23.1647 | 2 K.FPENRHI chr2@1477   | 5.16E-10 | 0.00781  |
| 16Mar2011 | 3091  | 510.3   | 12.8833  | 2 R.RHVAYVF chr1@1479   | 1.31E-11 | 1.68E-04 |
| 16Mar2011 | 16875 | 1147.24 | 4.705638 | 3 R.FQSAAIG Splice@chr  | 7.36E-11 | 0.001079 |
| 16Mar2011 | 4439  | 741.38  | -23.1647 | 2 K.FPENRHI chr2@1477   | 4.77E-10 | 0.006903 |
| 16Mar2011 | 13516 | 722.45  | -4.95112 | 2 R.RK+14.01 Splice@chr | 1.39E-10 | 0.002212 |
| 16Mar2011 | 4499  | 741.38  | -23.1647 | 2 K.FPENRHI chr2@1477   | 6.68E-10 | 0.009764 |
| 16Mar2011 | 7771  | 400.75  | 5.038673 | 2 K.VEAAVAI Splice@chr  | 4.19E-11 | 6.44E-04 |
| 16Mar2011 | 9175  | 1075.05 | -16.1169 | 2 R.TCSK+14. chr2@1253  | 9.87E-11 | 0.001656 |
| 16Mar2011 | 10635 | 1075.06 | -6.79295 | 2 R.TCSK+14. chr2@1253  | 2.78E-10 | 0.004082 |
| 16Mar2011 | 3293  | 510.3   | 12.8833  | 2 R.RHVAYVF chr1@1479   | 2.45E-10 | 0.003406 |
| 16Mar2011 | 12930 | 1056.87 | 4.800118 | 3 I.SRVEDDS Splice@chr  | 1.76E-12 | 0        |
| 16Mar2011 | 15867 | 634.84  | 6.410455 | 2 R.VDIGDILF Splice@chr | 9.23E-14 | 0        |
| 16Mar2011 | 11775 | 858.48  | 6.006088 | 3 _LETGIKPI Splice@chr  | 2.03E-13 | 0        |
| 16Mar2011 | 3138  | 510.3   | 12.8833  | 2 R.RHVAYVF chr1@1479   | 1.21E-10 | 0.001934 |
| 16Mar2011 | 3192  | 510.3   | 12.8833  | 2 R.RHVAYVF chr1@1479   | 6.40E-11 | 0.001079 |

|           |       |         |          |                         |          |          |
|-----------|-------|---------|----------|-------------------------|----------|----------|
| 16Mar2011 | 8274  | 509.8   | -23.773  | 2 R.SSVIMLIV chr2@5767  | 6.57E-10 | 0.009252 |
| 16Mar2011 | 3347  | 510.3   | 12.8833  | 2 R.RHVAYVF chr1@1479   | 1.28E-10 | 0.002071 |
| 16Mar2011 | 3244  | 510.3   | 12.8833  | 2 R.RHVAYVF chr1@1479   | 6.54E-12 | 0        |
| 16Mar2011 | 12196 | 622.33  | 9.587405 | 2 R.AK+14.01 chr2@4270  | 2.08E-10 | 0.002866 |
| 16Mar2011 | 14679 | 665.37  | -26.6417 | 2 Q.INNK+14 Splice@chr  | 6.39E-10 | 0.009252 |
| 16Mar2011 | 19485 | 634.84  | 6.410455 | 2 R.VDIGDILF Splice@chr | 4.09E-13 | 0        |
| 16Mar2011 | 20039 | 930.5   | -2.86763 | 3 E.SEYSTFV1 chr4@3265  | 3.32E-10 | 0.007419 |
| 16Mar2011 | 4162  | 510.3   | 12.8833  | 2 R.RHVAYVF chr1@1479   | 1.48E-10 | 0.002719 |
| 16Mar2011 | 11384 | 1075.05 | -16.1169 | 2 R.TCSK+14. chr2@1253  | 2.89E-10 | 0.006244 |
| 16Mar2011 | 17538 | 732.07  | 19.51873 | 3 R.ATDDWII Splice@chr  | 4.55E-10 | 0.009465 |
| 16Mar2011 | 5959  | 741.38  | -23.1647 | 2 K.FPENRHI, chr2@1477  | 2.42E-10 | 0.004937 |
| 16Mar2011 | 19529 | 634.83  | -9.39461 | 2 R.VDIGDILF Splice@chr | 6.16E-13 | 0        |
| 16Mar2011 | 11442 | 1075.05 | -16.1169 | 2 R.TCSK+14. chr2@1253  | 1.22E-10 | 0.002179 |
| 16Mar2011 | 4058  | 510.3   | 12.8833  | 2 R.RHVAYVF chr1@1479   | 7.70E-11 | 0.001256 |
| 16Mar2011 | 14051 | 887.93  | 29.43791 | 2 I.DEREESTM Splice@chr | 2.71E-10 | 0.005701 |
| 16Mar2011 | 7994  | 696.37  | -15.3603 | 2 _LPTSPIGC chr5@1204   | 2.12E-10 | 0.003934 |
| 16Mar2011 | 5847  | 741.38  | -23.1647 | 2 K.FPENRHI, chr2@1477  | 2.71E-10 | 0.005701 |
| 16Mar2011 | 18175 | 665.37  | -26.6417 | 2 Q.INNK+14 Splice@chr  | 4.62E-10 | 0.009672 |
| 16Mar2011 | 4009  | 510.3   | 12.8833  | 2 R.RHVAYVF chr1@1479   | 7.05E-11 | 0.001012 |
| 16Mar2011 | 3027  | 915.47  | 1.201399 | 1 K.FHEIGGQ chrX@4727   | 1.56E-10 | 0.002719 |
| 16Mar2011 | 3907  | 510.3   | 12.8833  | 2 R.RHVAYVF chr1@1479   | 6.40E-11 | 0.001012 |
| 16Mar2011 | 18724 | 812.12  | 14.27915 | 3 A.EITEMLP, Splice@chr | 2.19E-12 | 0        |
| 16Mar2011 | 21153 | 828.38  | -20.1128 | 2 K.PNLK+14 chr2@3862   | 5.34E-11 | 7.73E-04 |
| 16Mar2011 | 11332 | 1075.05 | -16.1169 | 2 R.TCSK+14. chr2@1253  | 1.09E-10 | 0.001948 |
| 16Mar2011 | 3956  | 510.3   | 12.8833  | 2 R.RHVAYVF chr1@1479   | 6.40E-11 | 0.001012 |
| 16Mar2011 | 5904  | 741.38  | -23.1647 | 2 K.FPENRHI, chr2@1477  | 3.94E-10 | 0.008327 |
| 16Mar2011 | 15130 | 622.33  | 9.587405 | 2 R.AK+14.01 chr2@4270  | 3.64E-10 | 0.00793  |
| 16Mar2011 | 13578 | 701.36  | 28.23715 | 3 K.NNPYMS. Splice@chr  | 1.64E-13 | 0        |
| 16Mar2011 | 7471  | 693.87  | -6.6949  | 2 V.ICVAVGD chr5@1063   | 1.64E-10 | 0.002829 |
| 16Mar2011 | 4108  | 510.3   | 12.8833  | 2 R.RHVAYVF chr1@1479   | 1.21E-10 | 0.002179 |
| 16Mar2011 | 11099 | 897.42  | -27.6753 | 3 _QVREMH Splice@chr    | 3.58E-10 | 0.008663 |
| 16Mar2011 | 7943  | 434.24  | 13.9946  | 3 _RSNDQTI chr5@6378    | 8.28E-11 | 0.003564 |
| 16Mar2011 | 3272  | 915.47  | 1.201399 | 1 K.FHEIGGQ chrX@4727   | 1.34E-10 | 0.004586 |
| 16Mar2011 | 11540 | 1075.05 | -16.1169 | 2 R.TCSK+14. chr2@1253  | 3.16E-10 | 0.008112 |
| 16Mar2011 | 8003  | 434.24  | 13.9946  | 3 _RSNDQTI chr5@6378    | 2.78E-10 | 0.007466 |
| 16Mar2011 | 11596 | 1075.05 | -16.1169 | 2 R.TCSK+14. chr2@1253  | 3.84E-10 | 0.009196 |
| 16Mar2011 | 19694 | 634.84  | 6.410455 | 2 R.VDIGDILF Splice@chr | 1.45E-12 | 0        |
| 16Mar2011 | 4315  | 510.3   | 12.8833  | 2 R.RHVAYVF chr1@1479   | 6.40E-11 | 0.00256  |
| 16Mar2011 | 15323 | 622.33  | 9.587405 | 2 R.AK+14.01 chr2@4270  | 2.08E-10 | 0.005895 |
| 16Mar2011 | 4208  | 510.3   | 12.8833  | 2 R.RHVAYVF chr1@1479   | 1.23E-10 | 0.004349 |
| 16Mar2011 | 4382  | 510.3   | 12.8833  | 2 R.RHVAYVF chr1@1479   | 1.62E-10 | 0.004899 |
| 16Mar2011 | 4260  | 510.3   | 12.8833  | 2 R.RHVAYVF chr1@1479   | 1.31E-11 | 5.95E-04 |
| 16Mar2011 | 4108  | 510.3   | 12.8833  | 2 R.RHVAYVF chr1@1479   | 6.40E-11 | 0.00256  |
| 16Mar2011 | 15425 | 622.33  | 9.587405 | 2 R.AK+14.01 chr2@4270  | 2.14E-10 | 0.005895 |
| 16Mar2011 | 14181 | 711.96  | -15.7141 | 5 R.YQCQTFF chrX@1494   | 2.27E-10 | 0.006231 |
| 16Mar2011 | 13307 | 1075.05 | -16.1169 | 2 R.TCSK+14. chr2@1253  | 3.43E-10 | 0.008438 |
| 16Mar2011 | 4161  | 510.3   | 12.8833  | 2 R.RHVAYVF chr1@1479   | 1.25E-10 | 0.004349 |

|           |       |         |          |                         |          |          |
|-----------|-------|---------|----------|-------------------------|----------|----------|
| 16Mar2011 | 16873 | 722.45  | -4.95112 | 2 R.RK+14.01 Splice@chr | 3.78E-10 | 0.009089 |
| 16Mar2011 | 19734 | 634.83  | -9.39461 | 2 R.VDIGDILF Splice@chr | 1.13E-12 | 0        |
| 16Mar2011 | 6070  | 531.29  | -6.73762 | 2 K.MPMGV\ chr2@6727    | 2.76E-10 | 0.007466 |
| 16Mar2011 | 14164 | 887.93  | 29.43791 | 2 I.DEREEST\ Splice@chr | 1.30E-10 | 0.004586 |
| 16Mar2011 | 6150  | 741.38  | -23.1647 | 2 K.FPENRHI\ chr2@1477  | 3.14E-10 | 0.008016 |
| 16Mar2011 | 6211  | 741.38  | -23.1647 | 2 K.FPENRHI\ chr2@1477  | 2.33E-10 | 0.006231 |
| 16Mar2011 | 2892  | 510.3   | 12.8833  | 2 R.RHVAYVF chr1@1479   | 7.05E-11 | 0.001738 |
| 16Mar2011 | 2395  | 562.33  | 22.25853 | 2 R.FYLLYLYK Splice@chr | 6.35E-11 | 0.001651 |
| 16Mar2011 | 6271  | 416.23  | 14.05769 | 2 K.NEGKTGF chr1@8724   | 2.66E-10 | 0.005485 |
| 16Mar2011 | 17207 | 634.84  | 6.410455 | 2 R.VDIGDILF Splice@chr | 3.81E-13 | 0        |
| 16Mar2011 | 5247  | 741.38  | -23.1647 | 2 K.FPENRHI\ chr2@1477  | 2.37E-10 | 0.004525 |
| 16Mar2011 | 13905 | 965.76  | 6.091444 | 4 R.K+14.016 chr5@2085  | 4.73E-10 | 0.009888 |
| 16Mar2011 | 1226  | 585.79  | -24.4226 | 2 K.QDPISAT\ Splice@chr | 1.67E-10 | 0.003459 |
| 16Mar2011 | 18316 | 1147.24 | 4.705638 | 3 R.FQSAAIG Splice@chr  | 3.95E-13 | 0        |
| 16Mar2011 | 16004 | 886.77  | -29.5706 | 3 G.FLFKSLC\ chr2@9496  | 3.23E-10 | 0.006905 |
| 16Mar2011 | 2937  | 510.3   | 12.8833  | 2 R.RHVAYVF chr1@1479   | 1.30E-10 | 0.002484 |
| 16Mar2011 | 16400 | 812.11  | 2.033465 | 3 A.EITEMLP\ Splice@chr | 3.47E-13 | 0        |
| 16Mar2011 | 5140  | 741.38  | -23.1647 | 2 K.FPENRHI\ chr2@1477  | 3.19E-10 | 0.006785 |
| 16Mar2011 | 13450 | 622.33  | 9.587405 | 2 R.AK+14.01 chr2@4270  | 1.08E-10 | 0.002112 |
| 16Mar2011 | 17249 | 634.84  | 6.410455 | 2 R.VDIGDILF Splice@chr | 4.79E-13 | 0        |
| 16Mar2011 | 2987  | 510.3   | 12.8833  | 2 R.RHVAYVF chr1@1479   | 1.21E-10 | 0.00236  |
| 16Mar2011 | 2050  | 570.3   | -19.2593 | 2 Q.EDADVLI chr3@7536   | 4.86E-10 | 0.008848 |
| 16Mar2011 | 3094  | 819.42  | -1.49155 | 1 R.EATETIR. chrX@2916  | 2.61E-10 | 0.004557 |
| 16Mar2011 | 3022  | 819.42  | -1.49155 | 1 R.EATETIR. chrX@2916  | 3.78E-10 | 0.008075 |
| 16Mar2011 | 18733 | 1003.47 | 13.4105  | 1 K.SSEFTEFR chr1@2727  | 1.91E-10 | 0.004978 |
| 16Mar2011 | 6350  | 407.74  | 5.852463 | 2 R.ASDIAPIK chrX@1799  | 1.15E-10 | 0.00439  |
| 16Mar2011 | 18640 | 1145.06 | -20.2726 | 2 K.SNK+14.0 chr4@8491  | 1.94E-11 | 2.40E-04 |
| 16Mar2011 | 4680  | 574.78  | -12.7209 | 2 K.TLWDENI Splice@chr  | 1.04E-10 | 0.005292 |
| 16Mar2011 | 20055 | 754.09  | 18.40716 | 3 _TLLEALD\ Splice@chr  | 9.96E-11 | 0.001932 |
| 16Mar2011 | 20611 | 754.09  | 18.40716 | 3 _TLLEALD\ Splice@chr  | 3.81E-11 | 0.001371 |
| 16Mar2011 | 19945 | 754.09  | 18.40716 | 3 _TLLEALD\ Splice@chr  | 4.49E-11 | 0.001323 |
| 16Mar2011 | 21512 | 1097.22 | 2.692596 | 3 K.DKPFFPSI Splice@chr | 8.55E-13 | 0        |
| 16Mar2011 | 22185 | 1096.89 | 6.757706 | 3 K.DKPFFPSI Splice@chr | 4.15E-11 | 0.001614 |
| 16Mar2011 | 21391 | 1096.89 | 6.757706 | 3 K.DKPFFPSI Splice@chr | 1.89E-10 | 0.006042 |
| 16Mar2011 | 20253 | 1096.89 | 6.757706 | 3 K.DKPFFPSI Splice@chr | 6.87E-11 | 0.001012 |
| 16Mar2011 | 23369 | 878.45  | 13.91226 | 1 R.SSGRCRR chr2@1315   | 3.72E-10 | 0.007688 |
| 16Mar2011 | 16480 | 985.5   | -20.0646 | 2 F.STSVEDK- chr4@8779  | 1.35E-10 | 0.003865 |
| 16Mar2011 | 6843  | 1047.55 | 15.47213 | 1 R.VLCDGEV chr5@6065   | 4.61E-10 | 0.008289 |
| 16Mar2011 | 14159 | 624.33  | -21.4438 | 2 R.FANK+14 Splice@chr  | 1.13E-10 | 0.003501 |
| 16Mar2011 | 1989  | 424.74  | -7.20804 | 2 _SSATVRA Splice@chr   | 2.12E-10 | 0.003934 |
| 16Mar2011 | 18567 | 921.5   | -28.1607 | 2 K.QK+14.0\ chr4@6045  | 7.16E-11 | 0.002554 |
| 16Mar2011 | 19064 | 1148.6  | -17.1254 | 2 R.TRVRSKI chr5@1508   | 1.15E-10 | 0.002069 |
| 16Mar2011 | 6244  | 676.38  | -7.77199 | 2 K.KNIFEAFE chr2@6111  | 4.79E-11 | 0.001994 |
| 16Mar2011 | 10207 | 1137.64 | -23.9488 | 1 Q.FLVISFA\ chrX@1232  | 3.80E-10 | 0.00813  |
| 16Mar2011 | 16666 | 649.9   | -18.3415 | 2 K.KLILKTNL chr3@1264  | 3.88E-10 | 0.009655 |
| 16Mar2011 | 16891 | 1165.6  | -6.68407 | 2 Q.VCSKGRE Splice@chr  | 1.18E-10 | 0.001804 |
| 16Mar2011 | 17114 | 1165.61 | 1.914663 | 2 Q.VCSKGRE Splice@chr  | 1.56E-10 | 0.004519 |

|            |       |         |          |                          |          |          |
|------------|-------|---------|----------|--------------------------|----------|----------|
| 16Mar2011  | 15399 | 1165.61 | 1.914663 | 2 Q.VCSKGRE Splice@chr   | 5.61E-11 | 0.001642 |
| 16Mar2011  | 17506 | 921.55  | 15.91309 | 2 S.LLTESLSIF Splice@chr | 3.18E-10 | 0.006884 |
| 16Mar2011  | 18092 | 765.76  | -16.0682 | 3 K.YLDAK+1 chr4@3751    | 3.04E-10 | 0.006696 |
| 16Mar2011  | 13854 | 1047.52 | 12.01457 | 2 K.PTGCSCE chrX@1395    | 2.33E-10 | 0.005456 |
| 16Mar2011  | 13625 | 698.4   | -24.6522 | 2 K.KRQIGTV chr2@1115    | 3.87E-10 | 0.009655 |
| 16Mar2011  | 2784  | 419.21  | 18.19507 | 2 R.EMSGEKI chr4@1565    | 9.91E-11 | 0.003032 |
| 16Mar2011  | 9422  | 440.24  | -24.8035 | 2 K.KNLDVYK Splice@chr   | 2.51E-10 | 0.005668 |
| 13July2011 | 5952  | 542.27  | 13.35355 | 3 K.FKYKNYD chr1@8835    | 1.87E-10 | 0.005877 |
| 16Mar2011  | 16401 | 819.42  | -16.1831 | 2 K.LMFFLKII chr1@1465   | 3.96E-10 | 0.007639 |
| 16Mar2011  | 907   | 470.24  | -26.7946 | 2 _YTAMVLI Splice@chr    | 2.28E-10 | 0.008808 |
| 13July2011 | 13050 | 731.41  | 13.62108 | 2 M.KEANCQ Splice@chr    | 3.75E-10 | 0.009743 |
| 16Mar2011  | 3129  | 414.74  | -1.18019 | 2 R.FAAAHLA chrX@1285    | 4.47E-10 | 0.008809 |
| 16Mar2011  | 21892 | 959.54  | 18.06294 | 2 Y.NNCKLNS chrX@1250    | 2.66E-10 | 0.004557 |
| 16Mar2011  | 22273 | 959.54  | 18.06294 | 2 Y.NNCKLNS chrX@1250    | 3.44E-10 | 0.009813 |
| 16Mar2011  | 22233 | 959.54  | 18.06294 | 2 Y.NNCKLNS chrX@1250    | 3.52E-10 | 0.009911 |
| 16Mar2011  | 19233 | 959.54  | 18.06294 | 2 Y.NNCKLNS chrX@1250    | 3.71E-10 | 0.007241 |
| 16Mar2011  | 21659 | 959.53  | 7.678192 | 2 Y.NNCKLNS chrX@1250    | 1.84E-10 | 0.007956 |
| 16Mar2011  | 21593 | 959.53  | 7.678192 | 2 Y.NNCKLNS chrX@1250    | 1.56E-11 | 6.78E-04 |
| 16Mar2011  | 21663 | 959.53  | 7.678192 | 2 Y.NNCKLNS chrX@1250    | 3.33E-10 | 0.009518 |
| 16Mar2011  | 4902  | 621.35  | 25.58192 | 2 R.LICLVAFD Splice@chr  | 4.44E-10 | 0.006789 |
| 16Mar2011  | 18464 | 980.17  | 9.391753 | 3 K.EHVGILT5 chr1@8945   | 1.83E-10 | 0.0056   |
| 16Mar2011  | 12665 | 861.43  | -18.843  | 2 R.NFQRISN chr2@1225    | 5.46E-10 | 0.00833  |
| 16Mar2011  | 3165  | 598.82  | -18.173  | 2 K.FYENIGRI chr2@2932   | 4.64E-10 | 0.006903 |
| 13July2011 | 1820  | 631.34  | 20.62524 | 2 R.VNK+14.1 chr1@1266   | 2.23E-10 | 0.005803 |
| 16Mar2011  | 21553 | 815.41  | 5.424138 | 3 K.YPNPLHS chr1@3425    | 4.99E-10 | 0.009216 |
| 16Mar2011  | 10049 | 516.29  | 9.357636 | 2 K.VSVDVLE chrX@1218    | 5.02E-11 | 0.001451 |
| 16Mar2011  | 5315  | 574.33  | -21.93   | 2 R.WKMAKI Splice@chr    | 3.14E-10 | 0.009401 |
| 16Mar2011  | 2071  | 527.27  | -26.7558 | 2 _TLWNFFF chr3@5755     | 6.81E-11 | 0.002344 |
| 16Mar2011  | 4562  | 439.91  | 17.33685 | 3 K.NSQKNPI chr2@3540    | 4.08E-10 | 0.008639 |
| 16Mar2011  | 13155 | 498.76  | -3.24946 | 2 R.FDELGLFI Splice@chr  | 1.82E-10 | 0.00585  |
| 16Mar2011  | 12919 | 498.76  | -3.24946 | 2 R.FDELGLFI Splice@chr  | 2.59E-10 | 0.005261 |
| 16Mar2011  | 13141 | 578.32  | 23.57678 | 2 _ITFSTNFT chr5@1838    | 1.35E-10 | 0.006202 |
| 16Mar2011  | 3628  | 479.26  | -3.85487 | 5 K.M+15.99 chr5@1646    | 2.08E-10 | 0.003288 |
| 16Mar2011  | 3634  | 479.26  | -3.85487 | 5 K.M+15.99 chr5@1646    | 8.16E-11 | 0.003298 |
| 16Mar2011  | 3510  | 479.26  | -3.85487 | 5 K.M+15.99 chr5@1646    | 8.48E-11 | 0.002749 |
| 16Mar2011  | 18854 | 731.39  | -3.59333 | 2 R.VDETLILC chr2@8606   | 5.30E-13 | 0        |
| 16Mar2011  | 19165 | 731.39  | -3.59333 | 2 R.VDETLILC chr2@8606   | 7.25E-13 | 0        |
| 16Mar2011  | 19121 | 731.9   | 7.814867 | 2 R.VDETLILC chr2@8606   | 3.98E-12 | 1.59E-04 |
| 16Mar2011  | 16952 | 731.39  | -3.59333 | 2 R.VDETLILC chr2@8606   | 3.76E-13 | 0        |
| 16Mar2011  | 15937 | 731.39  | -3.59333 | 2 R.VDETLILC chr2@8606   | 4.22E-13 | 0        |
| 16Mar2011  | 18709 | 731.39  | -3.59333 | 2 R.VDETLILC chr2@8606   | 1.25E-11 | 5.32E-04 |
| 16Mar2011  | 18663 | 731.39  | -3.59333 | 2 R.VDETLILC chr2@8606   | 9.60E-11 | 0.005028 |
| 16Mar2011  | 19302 | 731.39  | -3.59333 | 2 R.VDETLILC chr2@8606   | 5.90E-14 | 0        |
| 16Mar2011  | 19254 | 731.39  | -3.59333 | 2 R.VDETLILC chr2@8606   | 6.70E-12 | 1.39E-04 |
| 16Mar2011  | 18693 | 731.39  | -3.59333 | 2 R.VDETLILC chr2@8606   | 4.89E-13 | 0        |
| 16Mar2011  | 18747 | 731.4   | 10.11146 | 2 R.VDETLILC chr2@8606   | 2.87E-11 | 7.45E-04 |
| 16Mar2011  | 17932 | 731.39  | -3.59333 | 2 R.VDETLILC chr2@8606   | 2.14E-11 | 2.70E-04 |

|            |       |         |          |                         |          |          |
|------------|-------|---------|----------|-------------------------|----------|----------|
| 16Mar2011  | 17982 | 731.39  | -3.59333 | 2 R.VDETLILC chr2@8606  | 4.47E-11 | 3.92E-04 |
| 13July2011 | 12022 | 902.46  | -28.6945 | 3 K.HFEIYTES chr4@1461  | 3.47E-10 | 0.008496 |
| 16Mar2011  | 18686 | 472.29  | -16.9163 | 2 R.LLLGSGR chr3@1362   | 1.30E-10 | 0.003836 |
| 13July2011 | 12604 | 671.86  | -16.0125 | 4 K.IVKNSKTI chr5@1928  | 3.27E-10 | 0.00992  |
| 13July2011 | 14018 | 729.93  | 18.50543 | 4 K.AKILQKM chr1@1992   | 1.84E-10 | 0.005414 |
| 16Mar2011  | 2140  | 515.33  | 26.43288 | 2 R.NLGKIAEI chr1@3186  | 9.44E-11 | 0.003664 |
| 16Mar2011  | 23015 | 1122.59 | -11.8994 | 3 _WNGMLF chr2@5935     | 2.31E-10 | 0.004086 |
| 16Mar2011  | 3668  | 447.9   | -15.7516 | 3 R.VSPK+14 chr5@1257   | 5.36E-10 | 0.00966  |
| 16Mar2011  | 960   | 717.33  | -16.615  | 1 K.EPGSAEK chr4@1220   | 9.73E-11 | 0.001801 |
| 16Mar2011  | 19456 | 754.1   | 20.46108 | 3 _DLLEALD Splice@chr   | 2.40E-10 | 0.009535 |
| 16Mar2011  | 23805 | 508.27  | -0.64172 | 3 K.VEFMKH chr5@1476    | 2.77E-11 | 4.67E-04 |
| 13July2011 | 5004  | 571.3   | -3.85286 | 2 K.ENKPSRG Splice@chr  | 8.55E-12 | 4.93E-04 |
| 16Mar2011  | 18169 | 824.43  | -7.63469 | 2 K.YFVNFSN chr2@2115   | 2.26E-10 | 0.005058 |
| 16Mar2011  | 17654 | 824.43  | -7.63469 | 2 K.YFVNFSN chr2@2115   | 2.30E-10 | 0.004613 |
| 16Mar2011  | 1562  | 665.38  | -3.2154  | 2 R.QLQM+1 chr5@7160    | 2.71E-10 | 0.007056 |
| 16Mar2011  | 1670  | 665.38  | -3.2154  | 2 R.QLQM+1 chr5@7160    | 1.16E-10 | 0.003332 |
| 16Mar2011  | 1815  | 665.38  | -3.2154  | 2 R.QLQM+1 chr5@7160    | 2.26E-10 | 0.006824 |
| 16Mar2011  | 20135 | 1087.51 | 25.54535 | 2 K.NDETTFF chr2@1340   | 2.46E-10 | 0.009844 |
| 16Mar2011  | 17528 | 636.36  | -24.7842 | 2 P.LSSVGAD chrX@9700   | 8.74E-11 | 0.003298 |
| 16Mar2011  | 15761 | 693.82  | -13.9719 | 2 R.SSSMDYL Splice@chr  | 2.26E-10 | 0.005344 |
| 16Mar2011  | 10680 | 832.44  | -27.0658 | 2 K.VQETSEN chr3@1177   | 1.80E-11 | 9.27E-04 |
| 16Mar2011  | 20467 | 1056.54 | -28.4322 | 2 R.IEQWQLF Splice@chr  | 3.97E-10 | 0.007639 |
| 16Mar2011  | 15931 | 597.31  | -1.73983 | 3 K.ITKNCM+ chr2@1227   | 1.93E-10 | 0.008074 |
| 16Mar2011  | 16470 | 675.87  | -7.32566 | 2 R.KFEVFLEF chr4@1015  | 1.43E-10 | 0.006343 |
| 16Mar2011  | 18364 | 1008.99 | 6.53964  | 2 E.M+15.99 chrX@5576   | 2.73E-10 | 0.006017 |
| 16Mar2011  | 1537  | 418.71  | 14.39315 | 2 K.TASTAEI chr3@1316   | 4.09E-10 | 0.006548 |
| 16Mar2011  | 23386 | 1012.47 | -20.6554 | 1 R.VPCFFWF chr2@1041   | 2.93E-10 | 0.008359 |
| 16Mar2011  | 14017 | 1080.9  | -7.23447 | 3 K.EIVSTDLE Splice@chr | 1.23E-10 | 0.00362  |
| 16Mar2011  | 15632 | 1080.9  | -7.23447 | 3 K.EIVSTDLE Splice@chr | 1.15E-10 | 0.001948 |
| 16Mar2011  | 3091  | 692.34  | -2.47201 | 2 K.TAEHVEC Splice@chr  | 2.77E-13 | 0        |
| 16Mar2011  | 3092  | 692.34  | -2.47201 | 2 K.TAEHVEC Splice@chr  | 6.05E-13 | 0        |
| 13July2011 | 1343  | 510.28  | -4.37663 | 2 R.QTASSVL chr2@2536   | 2.19E-10 | 0.004796 |
| 13July2011 | 951   | 578.28  | -5.34214 | 2 K.MMTVTE chrX@2095    | 1.06E-10 | 0.004686 |
| 16Mar2011  | 651   | 873.5   | -22.6649 | 1 R.QLGFPIAI chr3@2252  | 3.52E-10 | 0.007561 |
| 16Mar2011  | 1280  | 873.51  | -11.1925 | 1 R.QLGFPIAI chr3@2252  | 3.09E-10 | 0.007103 |
| 16Mar2011  | 369   | 873.51  | -11.1925 | 1 R.QLGFPIAI chr3@2252  | 3.30E-10 | 0.008426 |
| 16Mar2011  | 1588  | 873.51  | -11.1925 | 1 R.QLGFPIAI chr3@2252  | 2.91E-10 | 0.008359 |
| 16Mar2011  | 1245  | 456.23  | -15.1506 | 2 K.KMYNDIK chrX@9704   | 2.71E-10 | 0.00628  |
| 16Mar2011  | 17829 | 969.99  | -24.6082 | 2 R.GK+14.0 chrX@1256   | 2.48E-10 | 0.006286 |
| 16Mar2011  | 5159  | 426.24  | 4.742047 | 3 K.YNPNSI Splice@chr   | 2.06E-10 | 0.006051 |
| 16Mar2011  | 17152 | 1026.58 | 26.51214 | 1 _FLNIYMP chr1@1151    | 1.12E-10 | 0.002112 |
| 16Mar2011  | 4634  | 422.24  | -10.4423 | 2 _FPKPEPK chrX@1509    | 3.36E-10 | 0.006841 |
| 16Mar2011  | 7052  | 908.47  | 22.76165 | 1 R.DGRMTV chr2@5006    | 1.95E-10 | 0.004881 |
| 16Mar2011  | 3140  | 553.29  | -14.5877 | 4 R.SHARRG chrX@2582    | 1.16E-10 | 0.003487 |
| 16Mar2011  | 2971  | 504.27  | 6.35262  | 3 K.VHVPSN Splice@chr   | 1.24E-10 | 0.002179 |
| 16Mar2011  | 9542  | 669.85  | 5.566583 | 2 K.FLK+14.0 chr1@7514  | 2.81E-11 | 8.85E-04 |
| 13July2011 | 10169 | 747.39  | -3.13513 | 3 S.EKLIKNS chr3@2571   | 1.82E-10 | 0.004131 |

|            |       |         |          |                         |          |          |
|------------|-------|---------|----------|-------------------------|----------|----------|
| 16Mar2011  | 9083  | 655.42  | -19.1194 | 2 K.DIK+14.0 chr4@157   | 3.92E-10 | 0.006314 |
| 13July2011 | 10620 | 858.48  | 2.135415 | 2 R.K+14.016 Splice@chr | 4.65E-12 | 0        |
| 16Mar2011  | 16425 | 879.04  | -23.542  | 2 K.KVAWK+ chr2@147     | 1.13E-10 | 0.003192 |
| 16Mar2011  | 16079 | 993.51  | 12.98097 | 3 R.WTESTIL Splice@chr  | 2.46E-10 | 0.005543 |
| 16Mar2011  | 22087 | 953.02  | 13.50395 | 2 K.LRMCLAV chr5@712    | 9.55E-11 | 0.003166 |
| 16Mar2011  | 2495  | 589.35  | 7.573144 | 2 R.ELSLNTFL chr5@242   | 9.07E-11 | 0.00278  |
| 16Mar2011  | 15895 | 1058.88 | -8.82955 | 3 Y.HRSVLDS Splice@chr  | 6.00E-13 | 0        |
| 16Mar2011  | 15899 | 794.41  | -11.369  | 4 Y.HRSVLDS Splice@chr  | 9.09E-11 | 0.001658 |
| 16Mar2011  | 15956 | 794.41  | -11.369  | 4 Y.HRSVLDS Splice@chr  | 1.19E-11 | 5.35E-04 |
| 16Mar2011  | 530   | 402.21  | -23.4276 | 2 R.AMAGAR chr5@921     | 2.64E-10 | 0.007901 |
| 16Mar2011  | 3215  | 497.93  | -24.8103 | 3 K.NAYFSK+ chr2@134    | 5.28E-10 | 0.007935 |
| 16Mar2011  | 10309 | 676.34  | -27.2669 | 2 K.FSAVNTA chr2@710    | 1.60E-11 | 9.61E-04 |
| 16Mar2011  | 4257  | 561.34  | 18.80897 | 2 _TPVNNVL chr1@105     | 6.73E-11 | 0.002673 |
| 16Mar2011  | 17320 | 929.49  | -20.4064 | 3 _CTRRNQ Splice@chr    | 3.19E-10 | 0.007151 |
| 16Mar2011  | 5318  | 616.85  | -6.73933 | 2 K.KAVSNFC chr5@191    | 4.25E-10 | 0.009172 |
| 16Mar2011  | 6067  | 616.85  | -6.73933 | 2 K.KAVSNFC chr5@191    | 1.27E-11 | 5.32E-04 |
| 16Mar2011  | 15061 | 831.94  | -22.6846 | 4 L.VKMVLVS Splice@chr  | 4.69E-10 | 0.009107 |
| 13July2011 | 3806  | 463.23  | -4.68765 | 2 K.NSNFGKI Splice@chr  | 4.72E-11 | 9.73E-04 |
| 13July2011 | 3314  | 499.8   | -7.64781 | 2 _LIVENAL Splice@chr   | 1.60E-10 | 0.00361  |
| 16Mar2011  | 16286 | 642.89  | -8.55783 | 2 R.KILIFKGF chr3@310   | 4.03E-10 | 0.009888 |
| 16Mar2011  | 11594 | 554.31  | -17.9899 | 3 R.SRRNGGI chr3@132    | 2.82E-10 | 0.005243 |
| 16Mar2011  | 19684 | 902.53  | 6.025544 | 1 R.RCGVIGL chr3@108    | 7.07E-11 | 0.002465 |
| 16Mar2011  | 15072 | 667.68  | 8.361817 | 3 R.DTATILAI Splice@chr | 1.68E-10 | 0.002464 |
| 16Mar2011  | 14185 | 838.94  | -22.1914 | 2 R.QFADLPS chr5@189    | 1.81E-10 | 0.00585  |
| 16Mar2011  | 18597 | 1067.09 | 27.52422 | 2 K.QK+14.0 chr1@491    | 3.51E-10 | 0.009714 |
| 16Mar2011  | 4332  | 487.3   | 24.66358 | 2 K.LQTSNGL Splice@chr  | 9.74E-11 | 0.003053 |
| 16Mar2011  | 5376  | 487.28  | -16.4424 | 2 K.LQTSNGL Splice@chr  | 2.32E-10 | 0.006231 |
| 16Mar2011  | 8203  | 404.22  | 20.84272 | 2 R.TSGGGG chr1@373     | 9.35E-11 | 0.001523 |
| 16Mar2011  | 21001 | 1118.91 | -28.9725 | 3 K.CKKCQK+ Splice@chr  | 3.95E-10 | 0.008315 |
| 16Mar2011  | 18532 | 505.29  | 24.05183 | 2 K.MKKTGKI chr1@193    | 6.07E-11 | 0.001379 |
| 16Mar2011  | 21407 | 1135.55 | 14.23679 | 2 _EWEDWC Splice@chr    | 2.69E-10 | 0.00553  |
| 16Mar2011  | 1881  | 600.34  | -18.2932 | 2 K.EKK+14.0 Splice@chr | 9.27E-11 | 0.002764 |
| 16Mar2011  | 11301 | 546.81  | -1.17329 | 2 K.K+14.016 chr5@551   | 2.47E-10 | 0.006568 |
| 16Mar2011  | 8022  | 480.26  | -3.48102 | 3 R.SK+14.01 Splice@chr | 4.02E-10 | 0.007671 |
| 16Mar2011  | 429   | 713.88  | -22.346  | 2 K.MKEKK+1 chr4@782    | 3.75E-10 | 0.008011 |
| 16Mar2011  | 9782  | 661.4   | -2.4954  | 2 K.LVLIAVN1 chr1@652   | 3.00E-10 | 0.00463  |
| 16Mar2011  | 9722  | 661.4   | -2.4954  | 2 K.LVLIAVN1 chr1@652   | 4.07E-10 | 0.006548 |
| 16Mar2011  | 23880 | 1012.47 | 1.935036 | 1 R.RSEWDYI chr2@134    | 3.68E-10 | 0.00683  |
| 16Mar2011  | 19059 | 1105.07 | 7.439885 | 2 R.QTSVEAK chr1@107    | 4.75E-10 | 0.00866  |
| 16Mar2011  | 10706 | 610.34  | -9.61597 | 2 R.SFGFSKK' Splice@chr | 6.35E-10 | 0.009252 |
| 16Mar2011  | 6059  | 584.79  | 4.182068 | 2 R.SATFIETP Splice@chr | 2.00E-10 | 0.005924 |
| 16Mar2011  | 5620  | 584.79  | 4.182068 | 2 R.SATFIETP Splice@chr | 3.88E-10 | 0.006314 |
| 16Mar2011  | 3641  | 415.75  | -21.4119 | 2 R.LVITAGTI chr2@132   | 4.06E-10 | 0.009888 |
| 16Mar2011  | 4546  | 416.26  | -1.32186 | 2 R.LVITAGTI chr2@132   | 3.15E-10 | 0.006942 |
| 16Mar2011  | 4674  | 415.75  | -21.4119 | 2 R.LVITAGTI chr2@132   | 5.67E-11 | 0.002233 |
| 16Mar2011  | 4653  | 415.75  | -21.4119 | 2 R.LVITAGTI chr2@132   | 1.49E-10 | 0.002719 |
| 16Mar2011  | 4765  | 415.75  | -21.4119 | 2 R.LVITAGTI chr2@132   | 2.83E-10 | 0.007466 |

|            |       |         |          |                         |          |          |
|------------|-------|---------|----------|-------------------------|----------|----------|
| 16Mar2011  | 10903 | 652.87  | -14.6064 | 2 R.HPPIM+1 chr2@5784   | 1.04E-10 | 0.004029 |
| 16Mar2011  | 19416 | 983.53  | 10.08234 | 4 K.ALRTKW\ chr1@1366   | 4.59E-10 | 0.009653 |
| 16Mar2011  | 3145  | 517.29  | -7.09318 | 2 _..FRVEVVE Splice@chr | 2.47E-10 | 0.005418 |
| 16Mar2011  | 17237 | 845.46  | 9.251646 | 2 _..LLIM+15. chr1@3010 | 4.31E-10 | 0.009254 |
| 13July2011 | 14227 | 909.22  | -1.27687 | 4 R.SIVVPVRI Splice@chr | 1.20E-10 | 0.003739 |
| 16Mar2011  | 13903 | 629     | 0.453558 | 3 L.VFHSFFIL chrX@1261  | 1.85E-10 | 0.004921 |
| 16Mar2011  | 15865 | 629     | 0.453558 | 3 L.VFHSFFIL chrX@1261  | 2.53E-10 | 0.007817 |
| 16Mar2011  | 15918 | 629     | 0.453558 | 3 L.VFHSFFIL chrX@1261  | 1.73E-10 | 0.005436 |
| 16Mar2011  | 12402 | 629     | 0.453558 | 3 L.VFHSFFIL chrX@1261  | 4.47E-10 | 0.006789 |
| 16Mar2011  | 15385 | 629     | 0.453558 | 3 L.VFHSFFIL chrX@1261  | 4.74E-10 | 0.009764 |
| 13July2011 | 10649 | 793.44  | 23.65737 | 3 K.MESSKTC chr4@1252   | 2.30E-10 | 0.005993 |
| 13July2011 | 8799  | 783.42  | 5.850706 | 2 K.FTHFVKS\ Splice@chr | 1.50E-10 | 0.004843 |
| 16Mar2011  | 10573 | 809.4   | 25.5958  | 1 R.STPYGER chr2@3858   | 3.59E-10 | 0.007428 |
| 16Mar2011  | 15633 | 975.98  | 15.81648 | 2 A.FNECLAS Splice@chr  | 2.46E-10 | 0.005352 |
| 16Mar2011  | 8005  | 478.76  | -12.2643 | 2 R.KEMPIPN Splice@chr  | 1.60E-11 | 3.98E-04 |
| 16Mar2011  | 7950  | 478.76  | -12.2643 | 2 R.KEMPIPN Splice@chr  | 1.08E-11 | 3.98E-04 |
| 16Mar2011  | 18666 | 1015.2  | -23.109  | 3 K.CLGVVFL chr1@1414   | 1.06E-10 | 0.003053 |
| 16Mar2011  | 17034 | 1048.07 | 19.97594 | 2 E.ADRVND\ Splice@chr  | 8.46E-13 | 0        |
| 16Mar2011  | 16979 | 1048.06 | 10.52795 | 2 E.ADRVND\ Splice@chr  | 3.41E-14 | 0        |
| 16Mar2011  | 17311 | 1047.57 | 21.57874 | 2 E.ADRVND\ Splice@chr  | 2.28E-11 | 9.72E-04 |
| 16Mar2011  | 17253 | 1047.57 | 21.57874 | 2 E.ADRVND\ Splice@chr  | 7.80E-12 | 4.48E-04 |
| 16Mar2011  | 15485 | 1048.06 | 10.52795 | 2 E.ADRVND\ Splice@chr  | 4.53E-12 | 0        |
| 16Mar2011  | 14635 | 1048.06 | 10.52795 | 2 E.ADRVND\ Splice@chr  | 5.10E-13 | 0        |
| 16Mar2011  | 17278 | 1048.07 | 19.97594 | 2 E.ADRVND\ Splice@chr  | 1.80E-12 | 0        |
| 16Mar2011  | 17224 | 1048.06 | 10.52795 | 2 E.ADRVND\ Splice@chr  | 5.89E-12 | 1.39E-04 |
| 16Mar2011  | 17174 | 1048.07 | 19.97594 | 2 E.ADRVND\ Splice@chr  | 3.92E-14 | 0        |
| 16Mar2011  | 16870 | 1048.07 | 19.97594 | 2 E.ADRVND\ Splice@chr  | 2.01E-12 | 0        |
| 16Mar2011  | 16926 | 1048.06 | 10.52795 | 2 E.ADRVND\ Splice@chr  | 1.23E-14 | 0        |
| 16Mar2011  | 16469 | 1048.07 | 19.97594 | 2 E.ADRVND\ Splice@chr  | 5.18E-13 | 0        |
| 16Mar2011  | 12438 | 889.69  | 20.28466 | 4 R.INPYMSS Splice@chr  | 1.74E-11 | 0.001031 |
| 16Mar2011  | 22274 | 688.04  | 26.06008 | 3 K.MIFSLDPI Splice@chr | 3.01E-10 | 0.005421 |
| 16Mar2011  | 22300 | 688.04  | 26.06008 | 3 R.MIFSLDP chrX@6059   | 3.09E-10 | 0.005518 |
| 16Mar2011  | 1401  | 605.31  | -0.85744 | 2 R.KCAQEFC chr1@5267   | 2.38E-10 | 0.009535 |
| 16Mar2011  | 11901 | 1004.81 | -8.08885 | 3 K.AVMFTVI Splice@chr  | 1.01E-16 | 0        |
| 16Mar2011  | 5931  | 474.27  | -3.54807 | 2 R.IGSSIGSG chr1@1151  | 1.11E-10 | 0.005431 |
| 16Mar2011  | 16862 | 983.53  | 12.25717 | 4 K.KYNFFEPi chr3@9699  | 3.31E-10 | 0.007381 |
| 16Mar2011  | 11227 | 789.44  | -20.0998 | 2 K.DKKKVFS Splice@chr  | 3.14E-10 | 0.008317 |
| 13July2011 | 5347  | 647.6   | 8.617804 | 4 R.K+14.016 chr1@6050  | 3.49E-12 | 0        |
| 16Mar2011  | 23008 | 678.33  | -22.2271 | 2 K.M+15.99 chr2@4314   | 3.17E-10 | 0.009329 |
| 16Mar2011  | 18412 | 837.71  | 1.873921 | 3 K.ENDIECV Splice@chr  | 8.48E-13 | 0        |
| 16Mar2011  | 4645  | 412.56  | -22.1132 | 3 _..NPRGKKC Splice@chr | 3.71E-10 | 0.007241 |
| 16Mar2011  | 8234  | 533.82  | 16.26677 | 2 K.TNIYTILTI chr5@1329 | 5.03E-10 | 0.009216 |
| 16Mar2011  | 7311  | 533.82  | 16.26677 | 2 K.TNIYTILTI chr5@1329 | 3.09E-10 | 0.006195 |
| 16Mar2011  | 7389  | 534.32  | 13.11853 | 2 K.TNIYTILTI chr5@1329 | 1.75E-10 | 0.004793 |
| 16Mar2011  | 6489  | 533.82  | 16.26677 | 2 K.TNIYTILTI chr5@1329 | 3.62E-10 | 0.009045 |
| 16Mar2011  | 7995  | 533.82  | 16.26677 | 2 K.TNIYTILTI chr5@1329 | 2.91E-10 | 0.006169 |
| 16Mar2011  | 5952  | 533.82  | 16.26677 | 2 K.TNIYTILTI chr5@1329 | 2.69E-10 | 0.007242 |

|            |       |         |          |                         |          |          |
|------------|-------|---------|----------|-------------------------|----------|----------|
| 16Mar2011  | 8290  | 533.82  | 16.26677 | 2 K.TNIYTILTI chr5@1329 | 2.45E-10 | 0.006568 |
| 13July2011 | 5173  | 584.33  | 20.9994  | 2 K.IKDLNIYC chr5@6390  | 2.99E-10 | 0.007031 |
| 16Mar2011  | 6639  | 489.28  | 28.87637 | 2 R.RGTASRS chr5@1951   | 3.89E-10 | 0.009417 |
| 16Mar2011  | 8225  | 1197.58 | -2.80601 | 1 R.YEVASGS chr2@2996   | 4.60E-10 | 0.009214 |
| 16Mar2011  | 16091 | 803.93  | 13.57891 | 2 H.ASSLMII\ Splice@chr | 3.44E-10 | 0.009813 |
| 16Mar2011  | 16040 | 803.93  | 13.57891 | 2 H.ASSLMII\ Splice@chr | 1.42E-10 | 0.004178 |
| 16Mar2011  | 17136 | 731.63  | 29.32291 | 4 _TKQNNEL Splice@chr   | 2.16E-10 | 0.005895 |
| 16Mar2011  | 5689  | 449.9   | 15.77259 | 3 K.WWLEPR chr3@3094    | 3.13E-10 | 0.006304 |
| 16Mar2011  | 6309  | 787.43  | -1.78505 | 1 K.SDAAPAK chrX@8018   | 3.92E-11 | 3.92E-04 |
| 13July2011 | 13269 | 647.35  | 7.892891 | 2 K.CGK+14.( chr4@1595  | 1.17E-10 | 0.002739 |
| 16Mar2011  | 22556 | 794.38  | -28.189  | 1 _TMSKNGI chr4@8922    | 1.62E-10 | 0.004747 |
| 16Mar2011  | 3635  | 529.31  | -17.9798 | 2 R.ENKGIRL chr1@9086   | 2.88E-10 | 0.005765 |
| 16Mar2011  | 3743  | 529.31  | -17.9798 | 2 R.ENKGIRL chr1@9086   | 1.28E-10 | 0.003578 |
| 16Mar2011  | 16426 | 1092.54 | -22.3476 | 2 R.NYEISEKI chr3@9667  | 4.38E-10 | 0.006789 |
| 16Mar2011  | 17230 | 909.21  | -23.1068 | 4 _NRK+14.( chr4@1176   | 3.01E-10 | 0.007943 |
| 16Mar2011  | 17754 | 1046.54 | -21.112  | 2 Q.SLSVLPEI Splice@chr | 3.22E-10 | 0.008112 |
| 16Mar2011  | 23177 | 972.5   | 20.002   | 1 K.FSIAAFCF chr4@2141  | 1.66E-10 | 0.007015 |
| 16Mar2011  | 23281 | 875.47  | -12.7728 | 1 K.TGGSNRK chr3@1090   | 1.22E-10 | 0.005983 |
| 16Mar2011  | 8397  | 433.26  | -28.8751 | 2 R.GLAAIHR chr2@1579   | 1.53E-10 | 0.002973 |
| 16Mar2011  | 717   | 437.75  | -8.73436 | 2 K.LQKVGDS chrX@8106   | 2.20E-10 | 0.008389 |
| 16Mar2011  | 2678  | 530.3   | -13.3763 | 2 R.RIFTAAQ chr1@1130   | 1.47E-10 | 0.004681 |
| 16Mar2011  | 18359 | 1106.52 | -25.8375 | 2 K.YLCPFPSL chr2@9265  | 2.85E-10 | 0.00636  |
| 16Mar2011  | 14576 | 507.28  | 21.62053 | 3 K.GPM+15. chr4@9762   | 1.32E-10 | 0.003836 |
| 16Mar2011  | 8409  | 558.29  | -20.3708 | 3 R.EK+14.01 chr1@1077  | 5.80E-11 | 0.001966 |
| 16Mar2011  | 8657  | 558.29  | -20.3708 | 3 R.EK+14.01 chr1@1077  | 3.09E-11 | 3.27E-04 |
| 16Mar2011  | 11396 | 505.64  | -19.8354 | 3 _K+14.016 chrX@1507   | 4.58E-10 | 0.009121 |
| 16Mar2011  | 5145  | 703.37  | -12.3904 | 2 K.WPNPKC chr3@1267    | 1.91E-10 | 0.004978 |
| 16Mar2011  | 5417  | 703.37  | -12.3904 | 2 K.WPNPKC chr3@1267    | 1.80E-10 | 0.004747 |
| 16Mar2011  | 1519  | 823.42  | 16.42439 | 1 K.MGETKEI chr4@9647   | 3.30E-10 | 0.008426 |
| 16Mar2011  | 207   | 428.25  | 4.722407 | 2 _KAAKHGI chr4@3991    | 1.47E-10 | 0.004411 |
| 16Mar2011  | 16045 | 812.18  | 10.13285 | 3 K.TLKKRDK chr2@1318   | 9.60E-11 | 0.0031   |
| 16Mar2011  | 994   | 494.79  | 4.388084 | 2 K.TLVVDSN chr5@1373   | 2.51E-10 | 0.005005 |
| 16Mar2011  | 9743  | 616.33  | -16.7632 | 2 K.LSKSVIFQ chr3@2798  | 2.96E-10 | 0.006737 |
| 16Mar2011  | 16225 | 505.25  | 2.602438 | 2 K.HVFNQF/ chrX@3830   | 2.83E-10 | 0.008647 |
| 13July2011 | 7517  | 660.84  | 16.09544 | 2 R.M+15.99 chr1@5989   | 3.35E-10 | 0.009445 |
| 13July2011 | 7825  | 660.84  | 16.09544 | 2 R.M+15.99 chr1@5989   | 2.22E-10 | 0.005803 |
| 16Mar2011  | 18314 | 983.28  | -27.8275 | 4 _ETLSILHF Splice@chr  | 3.82E-10 | 0.009534 |
| 16Mar2011  | 18960 | 1039.03 | -2.11678 | 2 R.NSVANIG Splice@chr  | 6.54E-19 | 0        |
| 16Mar2011  | 15797 | 1047.52 | -17.1025 | 1 K.K+14.016 chrX@3110  | 2.56E-10 | 0.006405 |
| 13July2011 | 7570  | 520.75  | -28.7704 | 4 K.QHVLVDI chrX@4617   | 1.82E-10 | 0.005414 |
| 16Mar2011  | 5142  | 439.91  | -1.85417 | 3 K.VAGSGSL chr5@1747   | 2.28E-11 | 6.78E-04 |
| 16Mar2011  | 5193  | 439.91  | -1.85417 | 3 K.VAGSGSL chr5@1747   | 1.26E-10 | 0.006104 |
| 16Mar2011  | 17034 | 744.71  | -3.82989 | 3 R.MTRVFSI chr3@1713   | 8.28E-12 | 4.24E-04 |
| 16Mar2011  | 17577 | 1023.04 | 1.166152 | 2 K.RYFQFCK chr2@1418   | 4.53E-10 | 0.00891  |
| 16Mar2011  | 2475  | 615.8   | -25.1166 | 2 K.ETSHLNF chrX@2984   | 5.42E-11 | 0.001878 |
| 16Mar2011  | 2592  | 501.28  | -5.06607 | 2 K.HTERKTT chrX@4365   | 3.29E-10 | 0.007066 |
| 16Mar2011  | 2543  | 501.28  | -5.06607 | 2 K.HTERKTT chrX@4365   | 9.01E-11 | 0.00319  |

|            |       |         |          |                         |          |          |
|------------|-------|---------|----------|-------------------------|----------|----------|
| 16Mar2011  | 5545  | 454.24  | 9.224734 | 2 K.AEQFGSL Splice@chr  | 3.90E-10 | 0.007542 |
| 16Mar2011  | 5319  | 454.24  | 9.224734 | 2 K.AEQFGSL Splice@chr  | 4.92E-10 | 0.009661 |
| 16Mar2011  | 7241  | 502.77  | -28.0376 | 2 _LPFPNK+ chr3@9211    | 2.58E-10 | 0.005245 |
| 13July2011 | 12860 | 720.9   | -28.0626 | 2 _KIVSSFKN chrX@1225   | 2.14E-10 | 0.004796 |
| 16Mar2011  | 18062 | 805.47  | -13.7324 | 2 K.TPIFIPAP chr5@1861  | 2.91E-10 | 0.006737 |
| 16Mar2011  | 20668 | 805.46  | -26.0992 | 2 K.TPIFIPAP chr5@1861  | 4.40E-10 | 0.009436 |
| 16Mar2011  | 20627 | 805.46  | -26.0992 | 2 K.TPIFIPAP chr5@1861  | 2.22E-10 | 0.004921 |
| 16Mar2011  | 730   | 459.25  | 4.002563 | 2 R.AIQSASSI chr2@1035  | 4.46E-10 | 0.009642 |
| 16Mar2011  | 19522 | 930.49  | -24.7347 | 2 R.KSMRKR chrX@1522    | 1.11E-10 | 0.004349 |
| 16Mar2011  | 476   | 515.33  | 11.70274 | 2 _KQKPKFP chr5@2015    | 4.30E-10 | 0.009254 |
| 16Mar2011  | 19172 | 756.38  | -6.76239 | 3 _EM+15.9 chr4@6155    | 1.86E-10 | 0.005173 |
| 16Mar2011  | 15210 | 679.36  | -19.132  | 2 K.QRSRPVII chr5@8132  | 1.45E-11 | 7.60E-04 |
| 16Mar2011  | 8000  | 605.84  | 17.86184 | 2 R.KNFSTLM chr1@1491   | 5.79E-10 | 0.008401 |
| 16Mar2011  | 16624 | 833.03  | -7.90042 | 3 K.ENDIECV Splice@chr  | 7.57E-17 | 0        |
| 16Mar2011  | 16680 | 833.03  | -7.90042 | 3 K.ENDIECV Splice@chr  | 3.83E-12 | 3.08E-04 |
| 16Mar2011  | 19928 | 808.08  | -21.3763 | 3 K.KKCDSQE chr2@4904   | 2.90E-10 | 0.008647 |
| 16Mar2011  | 16574 | 921.5   | -15.9848 | 3 R.SVTGGRP chrX@1144   | 2.83E-10 | 0.0065   |
| 16Mar2011  | 2582  | 462.27  | 19.27652 | 2 K.KVFGGTS chr1@1092   | 2.30E-10 | 0.006186 |
| 16Mar2011  | 3499  | 506.77  | -0.6034  | 2 R.RFPGDPA Splice@chr  | 1.71E-10 | 0.007141 |
| 16Mar2011  | 19488 | 1038.53 | 4.117963 | 2 K.YQNTKM chr5@1234    | 1.87E-10 | 0.003393 |
| 16Mar2011  | 2616  | 530.33  | 26.37563 | 2 K.QVELSTLI Splice@chr | 5.64E-11 | 0.00301  |
| 16Mar2011  | 18199 | 622.34  | -12.6515 | 4 R.ICARALK chrX@7516   | 7.40E-11 | 0.002669 |
| 16Mar2011  | 13963 | 556.85  | 26.98454 | 2 R.NKEPNLII chr2@8282  | 3.42E-10 | 0.006275 |
| 16Mar2011  | 2917  | 497.77  | 11.3038  | 2 W.YGIDGLS chr2@7307   | 4.52E-10 | 0.008004 |
| 16Mar2011  | 1852  | 497.77  | 11.3038  | 2 W.YGIDGLS chr2@7307   | 5.57E-10 | 0.008401 |
| 16Mar2011  | 174   | 743.48  | 2.794988 | 1 K.KIGGAGII chr1@2885  | 8.66E-11 | 0.001513 |
| 16Mar2011  | 725   | 743.48  | 2.794988 | 1 K.KIGGAGII chr1@2885  | 8.66E-11 | 0.003664 |
| 16Mar2011  | 681   | 743.48  | 2.794988 | 1 K.KIGGAGII chr1@2885  | 8.66E-11 | 0.003664 |
| 16Mar2011  | 1847  | 566.28  | 14.68479 | 2 _FSSESK+1 Splice@chr  | 1.28E-10 | 0.002786 |
| 13July2011 | 13187 | 832.06  | -17.5281 | 3 K.CRQCDIS chr1@8080   | 1.77E-10 | 0.005414 |
| 16Mar2011  | 2281  | 466.23  | -6.23618 | 2 _RHNDFG Splice@chr    | 5.86E-11 | 0.001364 |
| 16Mar2011  | 17018 | 984.83  | -29.0218 | 3 R.HRK+14.1 Splice@chr | 3.82E-10 | 0.006052 |
| 13July2011 | 4802  | 428.28  | 2.571278 | 3 K.SNILSLKI chr1@5675  | 1.55E-10 | 0.004927 |
| 16Mar2011  | 3879  | 472.76  | -12.3556 | 2 R.MLVSPER chrX@3718   | 1.19E-10 | 0.003616 |
| 16Mar2011  | 20167 | 968.46  | -7.65469 | 3 K.FFKARFM chr5@1738   | 1.43E-10 | 0.005453 |
| 16Mar2011  | 19741 | 809.89  | -15.8918 | 2 K.SVSSRITF Splice@chr | 1.99E-11 | 2.40E-04 |
| 16Mar2011  | 17612 | 809.89  | -15.8918 | 2 K.SVSSRITF Splice@chr | 1.88E-10 | 0.004881 |
| 16Mar2011  | 16517 | 809.89  | -15.8918 | 2 K.SVSSRITF Splice@chr | 3.41E-11 | 9.88E-04 |
| 16Mar2011  | 16506 | 809.89  | -15.8918 | 2 K.SVSSRITF Splice@chr | 5.01E-11 | 9.84E-04 |
| 13July2011 | 14503 | 896.5   | -2.15835 | 3 K.RARLAKC chr4@7565   | 4.92E-11 | 0.002062 |
| 16Mar2011  | 447   | 570.31  | 11.0428  | 2 R.KK+14.01 chrX@1720  | 2.08E-10 | 0.004978 |
| 16Mar2011  | 280   | 570.31  | 11.0428  | 2 R.KK+14.01 chrX@1720  | 1.36E-10 | 0.004675 |
| 16Mar2011  | 9407  | 576.79  | -0.21201 | 2 R.SATFIETP Splice@chr | 5.82E-11 | 0.001761 |
| 16Mar2011  | 24127 | 960.55  | 3.504387 | 1 R.VGRCRRF chrX@1011   | 2.35E-10 | 0.006403 |
| 16Mar2011  | 17016 | 1071.11 | -4.10663 | 2 C.LM+15.9 chrX@5927   | 1.23E-11 | 9.27E-04 |
| 16Mar2011  | 19948 | 838.77  | 22.66832 | 3 R.ACQHCH chrX@6135    | 3.09E-10 | 0.006551 |
| 13July2011 | 2422  | 469.25  | -28.3037 | 3 K.IAKRVSLI chr1@4189  | 2.31E-10 | 0.005993 |

|            |       |         |          |                         |          |          |
|------------|-------|---------|----------|-------------------------|----------|----------|
| 16Mar2011  | 22162 | 1112.6  | -10.3226 | 2 K.RLFLSCG chr2@6256   | 1.37E-10 | 0.005124 |
| 16Mar2011  | 2597  | 1115.55 | -23.2926 | 1 R.RMPPAA chr2@1507    | 4.78E-10 | 0.00866  |
| 16Mar2011  | 2166  | 1115.55 | -23.2926 | 1 R.RMPPAA chr2@1507    | 7.33E-11 | 0.002459 |
| 16Mar2011  | 12824 | 556.85  | -28.4079 | 2 R.QNKIVLIV Splice@chr | 1.23E-10 | 0.003578 |
| 16Mar2011  | 12695 | 556.85  | -28.4079 | 2 R.QNKIVLIV Splice@chr | 3.38E-10 | 0.007687 |
| 16Mar2011  | 2750  | 473.76  | -14.1369 | 2 R.ILCASRAF chr5@2078  | 3.82E-10 | 0.008011 |
| 16Mar2011  | 13786 | 769.39  | 22.53597 | 2 K.DRQHASI chr3@5403   | 3.42E-10 | 0.008811 |
| 16Mar2011  | 4550  | 763.41  | -0.40028 | 1 K.QFVAGG chr5@7833    | 1.95E-10 | 0.0044   |
| 16Mar2011  | 6700  | 893.96  | 17.68046 | 2 _VADGNY Splice@chr    | 1.63E-12 | 1.81E-04 |
| 16Mar2011  | 6820  | 893.96  | 17.68046 | 2 _VADGNY Splice@chr    | 4.03E-13 | 0        |
| 16Mar2011  | 14253 | 564.8   | -11.6918 | 2 R.SPIFLDGT chr5@1896  | 2.94E-12 | 3.64E-04 |
| 16Mar2011  | 9909  | 630.86  | 16.57085 | 2 K.SQISQAT Splice@chr  | 7.38E-11 | 0.001108 |
| 16Mar2011  | 8445  | 630.86  | 16.57085 | 2 K.SQISQAT Splice@chr  | 1.30E-11 | 2.96E-04 |
| 16Mar2011  | 16862 | 942.96  | -4.14696 | 2 R.IK+14.01 chr2@1017  | 1.34E-10 | 0.004065 |
| 16Mar2011  | 9395  | 807.39  | -13.8259 | 3 R.HVEAQLL chr2@1348   | 3.86E-10 | 0.008327 |
| 16Mar2011  | 11599 | 825.46  | -13.1033 | 2 R.SARENKT Splice@chr  | 1.91E-10 | 0.0044   |
| 16Mar2011  | 11816 | 825.46  | -13.1033 | 2 R.SARENKT Splice@chr  | 1.61E-10 | 0.006882 |
| 16Mar2011  | 11879 | 701.38  | -29.6051 | 2 F.DKNIWNI chr5@6029   | 2.16E-10 | 0.005831 |
| 16Mar2011  | 10470 | 701.38  | -29.6051 | 2 F.DKNIWNI chr5@6029   | 3.03E-10 | 0.006856 |
| 16Mar2011  | 9541  | 701.38  | -29.6051 | 2 F.DKNIWNI chr5@6029   | 3.70E-10 | 0.009423 |
| 16Mar2011  | 11508 | 701.38  | -29.6051 | 2 F.DKNIWNI chr5@6029   | 3.71E-10 | 0.007688 |
| 16Mar2011  | 11694 | 701.38  | -29.6051 | 2 F.DKNIWNI chr5@6029   | 1.33E-10 | 0.006202 |
| 16Mar2011  | 11841 | 701.38  | -29.6051 | 2 F.DKNIWNI chr5@6029   | 1.07E-10 | 0.004061 |
| 16Mar2011  | 11786 | 701.38  | -29.6051 | 2 F.DKNIWNI chr5@6029   | 2.35E-10 | 0.009123 |
| 16Mar2011  | 11243 | 701.38  | -29.6051 | 2 F.DKNIWNI chr5@6029   | 2.14E-10 | 0.005895 |
| 16Mar2011  | 20232 | 649.9   | -9.68814 | 2 K.LKIITNLEI chr2@6716 | 1.18E-10 | 0.001804 |
| 16Mar2011  | 20118 | 649.9   | -9.68814 | 2 K.LKIITNLEI chr2@6716 | 1.06E-10 | 0.003495 |
| 16Mar2011  | 19105 | 649.9   | -9.68814 | 2 K.LKIITNLEI chr2@6716 | 2.48E-10 | 0.004937 |
| 13July2011 | 7575  | 504.29  | 6.063747 | 4 K.LARFARC Splice@chr  | 4.91E-11 | 0.002076 |
| 13July2011 | 11268 | 506.28  | 0.966374 | 4 K.NVITEYP chrX@5922   | 2.81E-10 | 0.006148 |
| 16Mar2011  | 16440 | 836.19  | 27.2596  | 4 _ENAGNCI chr1@1394    | 4.62E-10 | 0.009672 |
| 16Mar2011  | 3342  | 587.34  | 11.13845 | 2 R.ARAIEK+ chr4@5939   | 2.73E-10 | 0.005605 |
| 16Mar2011  | 18604 | 837.71  | 1.873921 | 3 K.ENDIECV chr5@7527   | 4.87E-13 | 0        |
| 16Mar2011  | 10031 | 1024.48 | 12.06041 | 1 R.MMDLGE chr3@5611    | 6.78E-11 | 0.003279 |
| 16Mar2011  | 9794  | 952.45  | -21.7464 | 2 _WILCSDS Splice@chr   | 3.09E-10 | 0.00475  |
| 16Mar2011  | 16380 | 1004.97 | -14.712  | 2 K.KVELALW Splice@chr  | 1.22E-22 | 0        |
| 16Mar2011  | 16429 | 1004.96 | -24.6213 | 2 K.KVELALW Splice@chr  | 1.34E-22 | 0        |
| 16Mar2011  | 16719 | 1005.47 | -16.3827 | 2 K.KVELALW Splice@chr  | 1.00E-19 | 0        |
| 16Mar2011  | 16662 | 1005.47 | -16.3827 | 2 K.KVELALW Splice@chr  | 5.86E-22 | 0        |
| 16Mar2011  | 16614 | 1005.47 | -16.3827 | 2 K.KVELALW Splice@chr  | 1.53E-22 | 0        |
| 16Mar2011  | 14990 | 1004.97 | -14.712  | 2 K.KVELALW Splice@chr  | 1.43E-22 | 0        |
| 16Mar2011  | 15045 | 1004.96 | -24.6213 | 2 K.KVELALW Splice@chr  | 2.54E-20 | 0        |
| 16Mar2011  | 14936 | 1004.97 | -14.712  | 2 K.KVELALW Splice@chr  | 3.17E-22 | 0        |
| 16Mar2011  | 14204 | 1005.47 | -16.3827 | 2 K.KVELALW Splice@chr  | 5.58E-21 | 0        |
| 16Mar2011  | 14153 | 1005.47 | -16.3827 | 2 K.KVELALW Splice@chr  | 7.78E-23 | 0        |
| 16Mar2011  | 14254 | 1005.47 | -16.3827 | 2 K.KVELALW Splice@chr  | 1.36E-22 | 0        |
| 16Mar2011  | 12287 | 1005.47 | -16.3827 | 2 K.KVELALW Splice@chr  | 1.17E-22 | 0        |

|            |       |         |          |                         |          |          |
|------------|-------|---------|----------|-------------------------|----------|----------|
| 16Mar2011  | 12722 | 1004.97 | -14.712  | 2 K.KVELALW Splice@chr  | 1.90E-22 | 0        |
| 16Mar2011  | 12669 | 1005.47 | -16.3827 | 2 K.KVELALW Splice@chr  | 2.11E-22 | 0        |
| 16Mar2011  | 13981 | 1005.47 | -16.3827 | 2 K.KVELALW Splice@chr  | 1.02E-22 | 0        |
| 16Mar2011  | 18963 | 824.43  | -15.6948 | 3 R.DRISVRD. chr4@1598  | 4.18E-11 | 0.002105 |
| 16Mar2011  | 10808 | 600.38  | -17.1075 | 2 R.KTGV LAL chr1@1370  | 2.75E-10 | 0.007056 |
| 16Mar2011  | 15226 | 907.49  | 16.33848 | 2 K.ECGGGRI chr5@1702   | 3.43E-10 | 0.007485 |
| 16Mar2011  | 15210 | 888.46  | 11.62323 | 2 K.DITLEVEA Splice@chr | 3.11E-13 | 0        |
| 16Mar2011  | 14985 | 888.46  | 11.62323 | 2 K.DITLEVEA Splice@chr | 1.52E-10 | 0.00427  |
| 16Mar2011  | 14930 | 888.46  | 11.62323 | 2 K.DITLEVEA Splice@chr | 5.82E-13 | 0        |
| 16Mar2011  | 12428 | 888.46  | 11.62323 | 2 K.DITLEVEA Splice@chr | 1.18E-11 | 7.60E-04 |
| 16Mar2011  | 5350  | 571.66  | 26.16946 | 3 K.KNSIFQP, chr1@2570  | 1.23E-10 | 0.004226 |
| 16Mar2011  | 3926  | 571.99  | 18.36266 | 3 K.KNSIFQP, chr1@2570  | 4.66E-11 | 7.94E-04 |
| 16Mar2011  | 5186  | 571.66  | 26.16946 | 3 K.KNSIFQP, chr1@2570  | 9.83E-11 | 0.00172  |
| 16Mar2011  | 5459  | 571.66  | 26.16946 | 3 K.KNSIFQP, chr1@2570  | 3.69E-10 | 0.008752 |
| 16Mar2011  | 5504  | 571.66  | 26.16946 | 3 K.KNSIFQP, chr1@2570  | 3.39E-10 | 0.008206 |
| 16Mar2011  | 10885 | 673.89  | -22.9185 | 2 K.PKNQFFV chr4@1320   | 4.38E-10 | 0.009254 |
| 16Mar2011  | 7658  | 634.88  | -7.6068  | 2 _YNYKITIL chr2@6867   | 5.60E-11 | 0.001943 |
| 13July2011 | 14285 | 682.43  | -4.00079 | 3 _ARTKRAS Splice@chr   | 1.80E-10 | 0.005414 |
| 16Mar2011  | 11589 | 832.45  | -13.0666 | 2 S.KMVK+14 chr5@1963   | 5.33E-10 | 0.00966  |
| 16Mar2011  | 16620 | 806.93  | -23.6037 | 2 K.LNFLAAC Splice@chr  | 1.88E-10 | 0.006042 |
| 16Mar2011  | 714   | 502.76  | 14.06629 | 2 R.EENEELLI chr5@1422  | 2.68E-10 | 0.008209 |
| 16Mar2011  | 1408  | 502.26  | 17.41275 | 2 R.EENEELLI chr5@1422  | 5.62E-11 | 0.002319 |
| 16Mar2011  | 14239 | 1069.03 | 28.38904 | 2 E.DTGDFEC Splice@chr  | 3.48E-12 | 0        |
| 16Mar2011  | 14298 | 1069.03 | 28.38904 | 2 E.DTGDFEC Splice@chr  | 7.82E-13 | 0        |
| 16Mar2011  | 18560 | 873     | -11.0591 | 2 K.NFK+14.( chr1@1451  | 1.42E-10 | 0.004026 |
| 16Mar2011  | 11140 | 725.88  | -9.68305 | 2 K.ENCRK+1 chr1@1195   | 4.30E-10 | 0.009254 |
| 16Mar2011  | 8447  | 512.28  | -21.6995 | 3 K.KVQNHSL chr5@4515   | 2.70E-10 | 0.007242 |
| 13July2011 | 12912 | 1023.85 | -26.4937 | 3 K.M+15.99 chr1@1038   | 3.12E-10 | 0.007204 |
| 16Mar2011  | 17456 | 744.36  | 27.42482 | 4 _SKFLGTTI Splice@chr  | 4.05E-10 | 0.008277 |
| 16Mar2011  | 6440  | 430.72  | -18.0384 | 2 R.VVDSIDG chr5@6422   | 4.36E-10 | 0.009254 |
| 16Mar2011  | 5092  | 430.72  | -18.0384 | 2 R.VVDSIDG chr5@6422   | 2.61E-10 | 0.006932 |
| 16Mar2011  | 6977  | 430.72  | -18.0384 | 2 R.VVDSIDG chr5@6422   | 2.92E-10 | 0.006244 |
| 16Mar2011  | 7149  | 430.72  | -18.0384 | 2 R.VVDSIDG chr5@6422   | 3.83E-10 | 0.009196 |
| 16Mar2011  | 10464 | 918.44  | 18.0738  | 2 R.M+15.99 chr5@1026   | 5.08E-10 | 0.009864 |
| 16Mar2011  | 1687  | 601.84  | -8.58919 | 2 R.EDVG EK+ Splice@chr | 2.52E-11 | 0.00112  |
| 16Mar2011  | 661   | 419.23  | -7.22396 | 2 R.RSPELVH chr5@4179   | 3.46E-10 | 0.007634 |
| 16Mar2011  | 2921  | 479.26  | -0.91887 | 5 S.AQNKRVI chrX@1448   | 2.16E-10 | 0.005325 |
| 16Mar2011  | 22155 | 910.49  | -29.509  | 2 K.NEK+14.( chr4@2358  | 2.08E-11 | 5.19E-04 |
| 16Mar2011  | 20122 | 1123.58 | -28.8418 | 3 R.RK+14.01 Splice@chr | 1.88E-10 | 0.003393 |
| 13July2011 | 7156  | 469.26  | -11.3499 | 2 K.LDVIWYK chr1@1085   | 3.15E-10 | 0.007204 |
| 16Mar2011  | 8308  | 665.38  | -22.7526 | 2 K.ILKSEKIG, chrX@1072 | 3.06E-11 | 0.001054 |
| 16Mar2011  | 17326 | 913.81  | -27.9808 | 3 K.LFQK+14. chrX@1399  | 2.66E-11 | 7.12E-04 |
| 16Mar2011  | 20319 | 621.84  | 6.938368 | 2 K.NSKKEDA Splice@chr  | 2.74E-10 | 0.004849 |
| 16Mar2011  | 22892 | 1077.57 | -23.282  | 3 K.FPANRQ1 chr2@1240   | 2.69E-10 | 0.00553  |
| 16Mar2011  | 13761 | 675.81  | 14.83385 | 2 K.LDSM+15 Splice@chr  | 4.62E-10 | 0.009945 |
| 16Mar2011  | 19267 | 686.9   | 28.56549 | 2 K.K+14.016 chr1@5262  | 1.54E-10 | 0.003597 |
| 16Mar2011  | 10617 | 873.45  | 11.16623 | 2 S.IM+15.99 Splice@chr | 2.71E-10 | 0.006017 |

|            |       |         |          |                         |          |          |
|------------|-------|---------|----------|-------------------------|----------|----------|
| 16Mar2011  | 9072  | 873.45  | 11.16623 | 2 S.IM+15.99 Splice@chr | 3.22E-10 | 0.008081 |
| 16Mar2011  | 11266 | 468.25  | 8.948133 | 2 K.IEDFLGNI chr1@1494  | 1.08E-10 | 0.003416 |
| 16Mar2011  | 12454 | 468.25  | 8.948133 | 2 K.IEDFLGNI chr1@1494  | 1.63E-10 | 0.003597 |
| 16Mar2011  | 12340 | 468.25  | 8.948133 | 2 K.IEDFLGNI chr1@1494  | 1.63E-10 | 0.003597 |
| 16Mar2011  | 12281 | 468.24  | -12.4751 | 2 K.IEDFLGNI chr1@1494  | 2.51E-10 | 0.007722 |
| 16Mar2011  | 19259 | 978.58  | -24.0795 | 2 K.YLRK+14. chr5@3678  | 2.12E-10 | 0.005895 |
| 16Mar2011  | 13925 | 599.78  | 26.60544 | 2 _M+15.99 chr2@8892    | 2.17E-10 | 0.005924 |
| 16Mar2011  | 12998 | 599.78  | 26.60544 | 2 _M+15.99 chr2@8892    | 5.91E-10 | 0.008529 |
| 16Mar2011  | 17932 | 991.51  | 24.02083 | 3 _IYVPADD Splice@chr   | 1.41E-15 | 0        |
| 16Mar2011  | 18170 | 991.51  | 24.02083 | 3 _IYVPADD Splice@chr   | 1.92E-10 | 0.007316 |
| 16Mar2011  | 17758 | 991.51  | 24.02083 | 3 _IYVPADD Splice@chr   | 2.48E-10 | 0.00762  |
| 16Mar2011  | 17112 | 991.51  | 24.02083 | 3 _IYVPADD Splice@chr   | 7.84E-16 | 0        |
| 16Mar2011  | 17057 | 991.51  | 24.02083 | 3 _IYVPADD Splice@chr   | 1.47E-16 | 0        |
| 16Mar2011  | 17219 | 991.51  | 24.02083 | 3 _IYVPADD Splice@chr   | 3.03E-12 | 1.60E-04 |
| 16Mar2011  | 17099 | 991.51  | 24.02083 | 3 _IYVPADD Splice@chr   | 7.80E-14 | 0        |
| 16Mar2011  | 20897 | 1139.63 | -29.2671 | 2 _LYSHGGC chr5@1707    | 1.15E-10 | 0.002069 |
| 16Mar2011  | 14299 | 655.34  | 28.21753 | 3 R.RSWAPV: chr1@1885   | 2.67E-10 | 0.00694  |
| 16Mar2011  | 953   | 593.34  | 22.56673 | 2 K.FLSAKCG chr2@1152   | 1.95E-10 | 0.005852 |
| 16Mar2011  | 18084 | 1148.61 | -20.8481 | 2 K.FQVTLDC chr1@5540   | 4.04E-10 | 0.009888 |
| 13July2011 | 6340  | 652.36  | -22.4888 | 2 K.YYFLNSKI chr2@3585  | 2.26E-10 | 0.004957 |
| 16Mar2011  | 7590  | 533.78  | -22.3007 | 2 I.KKDTSTM chrX@1251   | 2.94E-10 | 0.008879 |
| 16Mar2011  | 5386  | 703.37  | 25.69944 | 2 _WPPFHIN chr5@1065    | 1.41E-11 | 6.96E-04 |
| 16Mar2011  | 13965 | 806.38  | 3.362099 | 3 K.FFKPNTD chr5@7527   | 5.68E-19 | 0        |
| 16Mar2011  | 13907 | 806.38  | 3.362099 | 3 K.FFKPNTD chr5@7527   | 5.30E-18 | 0        |
| 16Mar2011  | 13365 | 806.37  | -9.17294 | 3 K.FFKPNTD chr5@7527   | 1.28E-18 | 0        |
| 16Mar2011  | 18480 | 570.31  | -10.0466 | 3 K.LLEDVEV' chr2@2845  | 3.93E-10 | 0.009763 |
| 16Mar2011  | 13043 | 844.43  | 17.99527 | 2 _EGDGEIE' Splice@chr  | 6.04E-12 | 1.39E-04 |
| 16Mar2011  | 11425 | 663.85  | -5.06443 | 2 N.KMIFSMI chr4@8622   | 1.87E-10 | 0.002895 |
| 16Mar2011  | 11664 | 663.85  | -5.06443 | 2 N.KMIFSMI chr4@8622   | 2.47E-10 | 0.007094 |
| 16Mar2011  | 11720 | 663.85  | -5.06443 | 2 N.KMIFSMI chr4@8622   | 3.01E-10 | 0.009324 |
| 16Mar2011  | 11050 | 663.85  | -5.06443 | 2 N.KMIFSMI chr4@8622   | 2.09E-10 | 0.003934 |
| 16Mar2011  | 14565 | 965.76  | 6.091444 | 4 R.KTSSCQK chr5@2085   | 1.30E-10 | 0.003773 |
| 16Mar2011  | 16558 | 550.63  | 9.075933 | 3 R.CFELFLK+ chrX@2485  | 1.07E-10 | 0.003929 |
| 16Mar2011  | 2870  | 903.45  | -24.6179 | 1 K.CLSIPASR chr2@5655  | 3.32E-10 | 0.009711 |
| 16Mar2011  | 6602  | 553.33  | -3.70337 | 2 K.PQAKPNI chr5@9002   | 1.97E-10 | 0.004514 |
| 16Mar2011  | 6944  | 553.33  | -3.70337 | 2 K.PQAKPNI chr5@9002   | 1.37E-10 | 0.005124 |
| 16Mar2011  | 14650 | 669.35  | -28.2834 | 2 K.LEFNISKI chr1@1931  | 4.34E-11 | 0.001712 |
| 16Mar2011  | 15032 | 669.35  | -28.2834 | 2 K.LEFNISKI chr1@1931  | 1.52E-11 | 2.96E-04 |
| 16Mar2011  | 2177  | 446.77  | 19.99118 | 2 R.PVFSITTK chrX@1588  | 2.51E-10 | 0.005663 |
| 16Mar2011  | 1700  | 446.77  | 19.99118 | 2 R.PVFSITTK chrX@1588  | 3.35E-10 | 0.008557 |
| 16Mar2011  | 2555  | 446.77  | 19.99118 | 2 R.PVFSITTK chrX@1588  | 2.23E-10 | 0.004393 |
| 16Mar2011  | 3259  | 552.79  | 8.139583 | 2 R.SHRGNLY Splice@chr  | 7.26E-11 | 0.001079 |
| 16Mar2011  | 13772 | 726.38  | -6.35569 | 2 I.NFLQLYDI Splice@chr | 4.68E-10 | 0.008571 |
| 16Mar2011  | 12674 | 725.88  | -4.04164 | 2 I.NFLQLYDI Splice@chr | 1.59E-10 | 0.004351 |
| 16Mar2011  | 12616 | 725.88  | -4.04164 | 2 I.NFLQLYDI Splice@chr | 8.32E-11 | 0.002577 |
| 16Mar2011  | 12050 | 725.88  | -4.04164 | 2 I.NFLQLYDI Splice@chr | 7.40E-11 | 0.001874 |
| 16Mar2011  | 11998 | 725.88  | -4.04164 | 2 I.NFLQLYDI Splice@chr | 4.47E-10 | 0.008666 |

|            |       |         |          |                          |          |          |
|------------|-------|---------|----------|--------------------------|----------|----------|
| 16Mar2011  | 12565 | 725.88  | -4.04164 | 2 I.NFLQLYDI Splice@chr  | 2.09E-10 | 0.0052   |
| 16Mar2011  | 12506 | 725.88  | -4.04164 | 2 I.NFLQLYDI Splice@chr  | 1.57E-10 | 0.004392 |
| 16Mar2011  | 11508 | 725.88  | -4.04164 | 2 I.NFLQLYDI Splice@chr  | 2.12E-10 | 0.005924 |
| 16Mar2011  | 11401 | 725.88  | -4.04164 | 2 I.NFLQLYDI Splice@chr  | 9.08E-11 | 0.003053 |
| 16Mar2011  | 11453 | 725.88  | -4.04164 | 2 I.NFLQLYDI Splice@chr  | 3.27E-10 | 0.008426 |
| 16Mar2011  | 10438 | 725.88  | -4.04164 | 2 I.NFLQLYDI Splice@chr  | 3.27E-11 | 9.34E-04 |
| 16Mar2011  | 10382 | 725.88  | -4.04164 | 2 I.NFLQLYDI Splice@chr  | 6.29E-11 | 0.002304 |
| 16Mar2011  | 10737 | 725.88  | -4.04164 | 2 I.NFLQLYDI Splice@chr  | 2.54E-10 | 0.003674 |
| 16Mar2011  | 10670 | 725.88  | -4.04164 | 2 I.NFLQLYDI Splice@chr  | 2.00E-10 | 0.002599 |
| 16Mar2011  | 13291 | 725.88  | -4.04164 | 2 I.NFLQLYDI Splice@chr  | 3.93E-10 | 0.008327 |
| 16Mar2011  | 13402 | 725.88  | -4.04164 | 2 I.NFLQLYDI Splice@chr  | 1.58E-10 | 0.002719 |
| 16Mar2011  | 13345 | 725.88  | -4.04164 | 2 I.NFLQLYDI Splice@chr  | 1.58E-10 | 0.002719 |
| 16Mar2011  | 13335 | 725.88  | -4.04164 | 2 I.NFLQLYDI Splice@chr  | 9.88E-11 | 0.003785 |
| 16Mar2011  | 13283 | 725.88  | -4.04164 | 2 I.NFLQLYDI Splice@chr  | 1.34E-10 | 0.004586 |
| 16Mar2011  | 13388 | 725.88  | -4.04164 | 2 I.NFLQLYDI Splice@chr  | 1.16E-10 | 0.004349 |
| 16Mar2011  | 2771  | 447.73  | -5.60175 | 2 K.YLDENLK chr3@1259    | 6.15E-10 | 0.009252 |
| 16Mar2011  | 7464  | 562.3   | -11.8068 | 2 K.LDK+14.C chr4@1121   | 3.48E-11 | 0.001365 |
| 13July2011 | 12281 | 886.15  | -5.60832 | 3 _.M+15.99 chr1@8715    | 2.67E-10 | 0.006494 |
| 16Mar2011  | 13247 | 717.88  | 22.648   | 2 K.RSVDKCC Splice@chr   | 4.56E-10 | 0.006789 |
| 16Mar2011  | 8465  | 446.74  | 17.86999 | 2 R.LDMSG1 chr5@6866     | 3.36E-10 | 0.008686 |
| 16Mar2011  | 17519 | 938.07  | 12.89681 | 2 K.RWKKK+ Splice@chr    | 5.83E-11 | 0.002162 |
| 16Mar2011  | 20306 | 606.29  | -10.0164 | 3 R.KSK+14.0 chr5@1057   | 4.86E-10 | 0.009851 |
| 16Mar2011  | 23128 | 663.89  | 0.276226 | 2 P.ARSRDIS1 chr5@1515   | 1.56E-10 | 0.006089 |
| 13July2011 | 4735  | 539.29  | 11.61213 | 3 K.FFQDFPK chr5@5099    | 6.65E-12 | 0        |
| 16Mar2011  | 17437 | 921     | 5.344731 | 2 K.RHRKEET chr1@5409    | 2.17E-11 | 6.78E-04 |
| 16Mar2011  | 19034 | 953.02  | 5.934625 | 2 K.EKKCNLIS chr1@1262   | 4.57E-10 | 0.009121 |
| 16Mar2011  | 23441 | 810.79  | -16.4811 | 3 K.NFQK+14 chr4@1384    | 2.50E-10 | 0.009944 |
| 16Mar2011  | 19014 | 931.56  | 28.91008 | 2 I.FLLSYILLSI chrX@1724 | 3.73E-10 | 0.00683  |
| 13July2011 | 14987 | 768.41  | -21.3672 | 2 K.TLFQILKL chr4@9618   | 2.43E-10 | 0.008003 |
| 16Mar2011  | 5608  | 742.89  | -5.22625 | 2 V.QMVVM1 Splice@chr    | 4.28E-10 | 0.009254 |
| 16Mar2011  | 4792  | 742.89  | -5.22625 | 2 V.QMVVM1 Splice@chr    | 2.06E-10 | 0.005924 |
| 16Mar2011  | 4461  | 742.89  | -5.22625 | 2 V.QMVVM1 Splice@chr    | 3.50E-10 | 0.005409 |
| 13July2011 | 580   | 556.26  | -9.07486 | 2 _.SMCSKVC Splice@chr   | 3.60E-10 | 0.008885 |
| 16Mar2011  | 23034 | 1175.11 | -2.15736 | 2 K.INWAVTI chr4@2890    | 6.79E-23 | 0        |
| 16Mar2011  | 23448 | 1175.12 | 6.371728 | 2 K.INWAVTI chr4@2890    | 3.61E-18 | 0        |
| 16Mar2011  | 11401 | 606.3   | -0.16697 | 3 R.NFFGSAT chrX@1588    | 2.12E-10 | 0.009015 |
| 16Mar2011  | 12841 | 458.93  | 2.09126  | 3 R.IDVK+14. Splice@chr  | 1.82E-10 | 0.002801 |
| 16Mar2011  | 10977 | 458.59  | -10.0483 | 3 R.IDVK+14. Splice@chr  | 1.60E-10 | 0.003459 |
| 16Mar2011  | 8469  | 692.38  | -0.08828 | 2 K.NK+14.01 chr4@1019   | 3.19E-10 | 0.008112 |
| 16Mar2011  | 19497 | 670.41  | 0.412216 | 2 _.NKFRIK+1 chrX@1642   | 6.24E-11 | 0.00256  |
| 16Mar2011  | 13908 | 1153.22 | -26.2628 | 3 F.EGIRTGG Splice@chr   | 6.41E-13 | 0        |
| 16Mar2011  | 11993 | 1153.22 | -26.2628 | 3 F.EGIRTGG Splice@chr   | 1.69E-13 | 0        |
| 16Mar2011  | 3117  | 510.29  | -26.9046 | 2 K.ILGILMM Splice@chr   | 3.25E-10 | 0.007322 |
| 16Mar2011  | 8765  | 770.94  | 24.07715 | 2 K.KTARNEK Splice@chr   | 3.41E-10 | 0.006941 |
| 13July2011 | 7026  | 413.58  | -27.6144 | 3 K.KAKSQIS1 chr5@1752   | 2.98E-10 | 0.007031 |
| 16Mar2011  | 12418 | 620.34  | -19.5759 | 2 K.NQMKTY chrX@7239     | 3.58E-10 | 0.008034 |
| 16Mar2011  | 9042  | 438.91  | 11.95119 | 3 R.LEVSGVG Splice@chr   | 1.52E-11 | 3.98E-04 |

|            |       |         |          |                          |          |          |
|------------|-------|---------|----------|--------------------------|----------|----------|
| 16Mar2011  | 19050 | 1123.58 | -28.6916 | 2 _ .IPHFDIIP Splice@chr | 2.51E-10 | 0.005352 |
| 16Mar2011  | 7513  | 548.84  | -21.1679 | 2 R.LKRNTPV Splice@chr   | 2.44E-10 | 0.006286 |
| 13July2011 | 13809 | 684.36  | -21.9565 | 4 _ .YLSVWST chr2@3458   | 9.36E-11 | 0.002703 |
| 16Mar2011  | 18140 | 608.31  | -27.5075 | 2 _ .LQK+14.C chr4@1385  | 1.08E-10 | 0.003501 |
| 13July2011 | 12242 | 728.04  | -25.5205 | 3 K.M+15.99 Splice@chr   | 2.41E-10 | 0.008003 |
| 13July2011 | 2375  | 644.8   | -0.85325 | 2 _ .K+14.016 chrX@1496  | 5.21E-11 | 0.002076 |
| 16Mar2011  | 16589 | 942.46  | -10.8915 | 2 K.CKKMEK chr2@1310     | 7.44E-14 | 0        |
| 16Mar2011  | 13059 | 532.8   | -27.2004 | 2 K.ILTGMK+ Splice@chr   | 3.99E-10 | 0.007578 |
| 16Mar2011  | 4564  | 702.41  | 17.17061 | 1 _ .VEVAGAF Splice@chr  | 1.12E-10 | 0.003261 |
| 16Mar2011  | 15318 | 899.97  | 3.975293 | 2 R.SK+14.01 chrX@1700   | 1.87E-10 | 0.003828 |
| 16Mar2011  | 15273 | 899.48  | 16.98333 | 2 R.SKNK+14 chrX@1700    | 2.42E-10 | 0.004646 |
| 16Mar2011  | 3257  | 602.24  | -7.71522 | 2 K.YCCVFPD Splice@chr   | 1.42E-10 | 0.003831 |
| 16Mar2011  | 2944  | 602.24  | -7.71522 | 2 K.YCCVFPD Splice@chr   | 3.53E-10 | 0.007561 |
| 13July2011 | 1249  | 565.28  | -11.3573 | 2 K.ICICHWLI chr5@1942   | 3.73E-11 | 0.001679 |
| 16Mar2011  | 155   | 523.27  | -14.3277 | 2 _ .QADVDV Splice@chr   | 1.26E-10 | 0.004814 |
| 16Mar2011  | 20974 | 797.44  | 7.938208 | 2 K.SSRRRCR chr5@9550    | 3.67E-11 | 9.73E-04 |
| 16Mar2011  | 20856 | 796.94  | 10.04569 | 2 K.SSRRRCR chr5@9550    | 1.14E-10 | 0.005572 |
| 16Mar2011  | 1890  | 632.33  | -10.5378 | 1 R.DKGAGG chr1@1325     | 2.02E-10 | 0.00274  |
| 13July2011 | 15588 | 821.43  | 24.04078 | 3 _ .LMHVTNI chr5@1616   | 2.00E-10 | 0.004638 |
| 16Mar2011  | 5905  | 418.23  | -18.5784 | 2 R.SPTVLYR. chrX@5492   | 5.22E-10 | 0.007935 |
| 16Mar2011  | 13177 | 813.41  | -23.8154 | 2 _ .QGKM+1 Splice@chr   | 3.13E-10 | 0.00733  |
| 16Mar2011  | 12937 | 682.32  | -26.3372 | 2 P.LSSWNVF Splice@chr   | 1.99E-10 | 0.003092 |
| 16Mar2011  | 7837  | 428.22  | -22.9543 | 2 K.SEAHAHI chrX@1415    | 1.99E-10 | 0.004514 |
| 16Mar2011  | 18582 | 879.47  | -1.11167 | 2 K.M+15.99 chr5@2041    | 7.18E-11 | 0.001108 |
| 13July2011 | 8318  | 505.53  | 25.40564 | 4 R.TCRK+14 chr1@2972    | 1.04E-10 | 0.002561 |
| 16Mar2011  | 2289  | 493.27  | 25.9144  | 2 G.VAGVGD chrX@9426     | 1.77E-10 | 0.005471 |
| 16Mar2011  | 7573  | 443.23  | -19.5983 | 2 R.LAGNAHI chr5@1551    | 2.00E-10 | 0.008484 |
| 16Mar2011  | 7601  | 633.32  | 3.378454 | 2 R.EKWRNFI chr1@3987    | 1.24E-10 | 0.004349 |
| 16Mar2011  | 14577 | 833.44  | -14.5174 | 1 _ .DIGYRIP.I chr4@5827 | 3.24E-10 | 0.00733  |
| 16Mar2011  | 13432 | 833.44  | -14.5174 | 1 _ .DIGYRIP.I chr4@5827 | 3.47E-10 | 0.008921 |
| 16Mar2011  | 12078 | 833.44  | -14.5174 | 1 _ .DIGYRIP.I chr4@5827 | 4.29E-10 | 0.009642 |
| 16Mar2011  | 17992 | 879.14  | -17.6078 | 3 R.GMDKVR chr5@1677     | 1.87E-10 | 0.006042 |
| 16Mar2011  | 4048  | 517.33  | 6.214252 | 2 R.KMLRMII chr1@1158    | 1.10E-10 | 0.003601 |
| 16Mar2011  | 4125  | 517.33  | 6.214252 | 2 R.KMLRMII Splice@chr   | 4.88E-10 | 0.009851 |
| 13July2011 | 10883 | 669.04  | 5.820962 | 3 L.IK+14.016 chr2@4934  | 3.48E-10 | 0.008496 |
| 16Mar2011  | 2908  | 695.35  | -9.5814  | 2 R.SSAEK+1. chr3@3295   | 8.40E-11 | 0.002129 |
| 16Mar2011  | 2126  | 695.35  | -9.5814  | 2 R.SSAEK+1. chr3@3295   | 6.36E-10 | 0.009252 |
| 16Mar2011  | 2075  | 695.35  | -9.5814  | 2 R.SSAEK+1. chr3@3295   | 1.03E-10 | 0.001656 |
| 16Mar2011  | 21150 | 1129.63 | 11.03231 | 2 K.KM+15.9 chr5@1576    | 1.06E-11 | 0        |
| 13July2011 | 14833 | 692.87  | 6.263564 | 2 R.MRKFIM- Splice@chr   | 3.67E-10 | 0.009743 |
| 16Mar2011  | 2523  | 466.24  | -7.4837  | 2 K.KGAHSTS chr2@1063    | 3.28E-10 | 0.009329 |
| 16Mar2011  | 2426  | 438.75  | -15.492  | 2 R.KMATPSI chr5@3717    | 9.48E-11 | 0.002798 |
| 16Mar2011  | 19556 | 965.53  | -19.1507 | 2 F.FLRQIRQI chr4@3226   | 9.08E-11 | 0.003664 |
| 16Mar2011  | 17064 | 965.53  | -19.1507 | 2 F.FLRQIRQI chr4@3226   | 1.09E-11 | 2.96E-04 |
| 16Mar2011  | 18999 | 1020    | -16.6884 | 2 R.NDWKIN chr4@3698     | 5.68E-11 | 0.00301  |
| 13July2011 | 11337 | 1043.2  | -20.21   | 3 _ .CNVPSLT chrX@9933   | 3.16E-10 | 0.007204 |
| 16Mar2011  | 314   | 570.31  | -24.229  | 2 K.RSK+14.0 chr4@1472   | 2.66E-10 | 0.003674 |

|            |       |         |          |                         |          |          |
|------------|-------|---------|----------|-------------------------|----------|----------|
| 16Mar2011  | 602   | 570.31  | -24.229  | 2 K.RSK+14.0 chr4@147   | 2.87E-10 | 0.007466 |
| 16Mar2011  | 7243  | 841.48  | -24.9081 | 2 _..KLNAK+1 chr1@142   | 4.29E-10 | 0.007835 |
| 16Mar2011  | 6429  | 841.48  | -24.9081 | 2 _..KLNAK+1 chr1@142   | 3.06E-10 | 0.006856 |
| 16Mar2011  | 6001  | 841.48  | -24.9081 | 2 _..KLNAK+1 chr1@142   | 2.08E-10 | 0.005924 |
| 16Mar2011  | 7181  | 841.48  | -24.9081 | 2 _..KLNAK+1 chr1@142   | 3.78E-10 | 0.008075 |
| 16Mar2011  | 7451  | 841.48  | -24.9081 | 2 _..KLNAK+1 chr1@142   | 1.94E-10 | 0.007316 |
| 16Mar2011  | 7115  | 841.48  | -24.9081 | 2 _..KLNAK+1 chr1@142   | 3.44E-10 | 0.009714 |
| 16Mar2011  | 4813  | 841.48  | -24.9081 | 2 _..KLNAK+1 chr1@142   | 4.10E-10 | 0.009371 |
| 16Mar2011  | 5174  | 841.98  | -26.9038 | 2 _..KLNAK+1 chr1@142   | 2.26E-10 | 0.00633  |
| 16Mar2011  | 5495  | 841.48  | -24.9081 | 2 _..KLNAK+1 chr1@142   | 3.02E-10 | 0.00475  |
| 16Mar2011  | 7102  | 841.48  | -24.9081 | 2 _..KLNAK+1 chr1@142   | 1.95E-10 | 0.0035   |
| 16Mar2011  | 7048  | 841.48  | -24.9081 | 2 _..KLNAK+1 chr1@142   | 2.00E-10 | 0.00361  |
| 16Mar2011  | 6997  | 841.48  | -24.9081 | 2 _..KLNAK+1 chr1@142   | 3.79E-10 | 0.008029 |
| 16Mar2011  | 7154  | 841.48  | -24.9081 | 2 _..KLNAK+1 chr1@142   | 2.31E-10 | 0.006231 |
| 16Mar2011  | 7215  | 841.48  | -24.9081 | 2 _..KLNAK+1 chr1@142   | 3.64E-10 | 0.008752 |
| 16Mar2011  | 6717  | 841.48  | -24.9081 | 2 _..KLNAK+1 chr1@142   | 9.30E-11 | 0.003664 |
| 13July2011 | 11974 | 770.4   | 26.23216 | 3 _..NMLGSPi Splice@chr | 2.80E-10 | 0.006148 |
| 16Mar2011  | 4092  | 843.91  | 2.027504 | 2 R.ADALYNF Splice@chr  | 4.31E-16 | 0        |
| 16Mar2011  | 2100  | 461.91  | 0.487466 | 3 _..ANYMKV chr3@131    | 2.79E-10 | 0.0065   |
| 16Mar2011  | 16243 | 1170.04 | -7.07652 | 2 K.K+14.016 chrX@276   | 4.67E-10 | 0.006903 |
| 16Mar2011  | 20881 | 705.41  | 5.545514 | 2 Y.QVSLTLVI chr4@173   | 1.05E-10 | 0.003402 |
| 16Mar2011  | 13181 | 881.94  | -11.2638 | 2 K.LQERVFE chr4@653    | 3.78E-10 | 0.008029 |
| 16Mar2011  | 16765 | 1017.61 | -10.7468 | 1 R.RFLGIIGN chr4@861   | 1.43E-10 | 0.001999 |
| 16Mar2011  | 11285 | 1030.52 | 12.84278 | 2 L.SPIPEVPC Splice@chr | 2.57E-12 | 6.18E-04 |
| 16Mar2011  | 16692 | 849.92  | -25.7389 | 2 K.ATNFRFP chr4@304    | 1.80E-11 | 2.70E-04 |
| 16Mar2011  | 9153  | 1082.02 | -7.56573 | 2 R.YRCIFDNI chr2@938   | 2.57E-10 | 0.005668 |
| 16Mar2011  | 18246 | 912.99  | -3.34628 | 2 F.TEMPLGC chrX@986    | 1.03E-11 | 2.40E-04 |
| 16Mar2011  | 18304 | 913.49  | -5.18556 | 2 F.TEMPLGC chrX@986    | 6.96E-12 | 1.28E-04 |
| 16Mar2011  | 18525 | 912.99  | -3.34628 | 2 F.TEMPLGC chrX@986    | 1.23E-10 | 0.003725 |
| 16Mar2011  | 18419 | 913     | 7.629518 | 2 F.TEMPLGC chrX@986    | 2.65E-11 | 9.72E-04 |
| 16Mar2011  | 18466 | 912.99  | -3.34628 | 2 F.TEMPLGC chrX@986    | 3.08E-11 | 0.001365 |
| 16Mar2011  | 16434 | 913.49  | -5.18556 | 2 F.TEMPLGC chrX@986    | 7.95E-12 | 4.24E-04 |
| 16Mar2011  | 16486 | 912.99  | -3.34628 | 2 F.TEMPLGC chrX@986    | 1.14E-10 | 0.003487 |
| 16Mar2011  | 15531 | 912.99  | -3.34628 | 2 F.TEMPLGC chrX@986    | 1.17E-12 | 0        |
| 16Mar2011  | 15490 | 912.99  | -3.34628 | 2 F.TEMPLGC chrX@986    | 3.64E-13 | 0        |
| 16Mar2011  | 18185 | 912.99  | -3.34628 | 2 F.TEMPLGC chrX@986    | 8.31E-12 | 3.64E-04 |
| 16Mar2011  | 18097 | 913.5   | 5.790241 | 2 F.TEMPLGC chrX@986    | 4.35E-11 | 0.002264 |
| 16Mar2011  | 18555 | 912.99  | -3.34628 | 2 F.TEMPLGC chrX@986    | 5.45E-12 | 1.39E-04 |
| 16Mar2011  | 18608 | 913.49  | -5.18556 | 2 F.TEMPLGC chrX@986    | 1.59E-11 | 3.98E-04 |
| 16Mar2011  | 18091 | 913.5   | 5.790241 | 2 F.TEMPLGC chrX@986    | 1.43E-12 | 0        |
| 16Mar2011  | 18145 | 912.99  | -3.34628 | 2 F.TEMPLGC chrX@986    | 1.23E-12 | 0        |
| 16Mar2011  | 14011 | 913.5   | 5.790241 | 2 F.TEMPLGC chrX@986    | 6.66E-11 | 0.001079 |
| 16Mar2011  | 17516 | 913.5   | 5.790241 | 2 F.TEMPLGC chrX@986    | 1.36E-11 | 5.95E-04 |
| 16Mar2011  | 15395 | 913.5   | 5.790241 | 2 F.TEMPLGC chrX@986    | 1.65E-11 | 2.96E-04 |
| 16Mar2011  | 11178 | 441.25  | -19.8251 | 2 _..VSYSLGKI chr5@893  | 2.18E-10 | 0.009282 |
| 16Mar2011  | 12606 | 754.38  | -22.1257 | 3 K.VGTVPDF chr1@334    | 2.23E-10 | 0.006722 |
| 16Mar2011  | 10698 | 744.38  | 1.067376 | 2 R.WGDHGF Splice@chr   | 4.09E-10 | 0.006548 |

|            |       |         |          |                         |          |          |
|------------|-------|---------|----------|-------------------------|----------|----------|
| 16Mar2011  | 1464  | 410.25  | 18.74326 | 2 R.KNGSATI chr5@1162   | 3.16E-10 | 0.006551 |
| 16Mar2011  | 17027 | 990.54  | 18.60763 | 2 R.EMNNLN chr4@6582    | 3.69E-10 | 0.007557 |
| 16Mar2011  | 1175  | 529.35  | -0.51831 | 2 K.KLLKGL chr4@1545    | 1.81E-10 | 0.003169 |
| 16Mar2011  | 5693  | 1068.56 | 13.79386 | 1 R.FMRGAA chr1@8018    | 3.50E-10 | 0.009911 |
| 16Mar2011  | 17673 | 878.8   | 23.67465 | 3 K.NSISTAS chr5@6790   | 2.41E-10 | 0.004835 |
| 13July2011 | 14665 | 803.47  | 10.88211 | 3 K.KCKK+14 chr5@1248   | 4.70E-11 | 0.00192  |
| 16Mar2011  | 1321  | 748.36  | 16.41564 | 1 R.ATAGDGI chr3@5845   | 3.04E-12 | 1.28E-04 |
| 16Mar2011  | 1356  | 748.36  | 16.41564 | 1 R.ATAGDGI chr3@5845   | 3.04E-12 | 1.28E-04 |
| 16Mar2011  | 1393  | 748.36  | 16.41564 | 1 R.ATAGDGI chr3@5845   | 1.56E-12 | 1.28E-04 |
| 16Mar2011  | 1320  | 748.36  | 16.41564 | 1 R.ATAGDGI chr3@5845   | 5.48E-12 | 3.09E-04 |
| 16Mar2011  | 1353  | 748.36  | 16.41564 | 1 R.ATAGDGI chr3@5845   | 4.07E-12 | 1.59E-04 |
| 16Mar2011  | 1429  | 748.36  | 16.41564 | 1 R.ATAGDGI chr3@5845   | 3.04E-12 | 0        |
| 16Mar2011  | 1040  | 748.36  | 16.41564 | 1 R.ATAGDGI chr3@5845   | 3.68E-10 | 0.007241 |
| 16Mar2011  | 329   | 748.36  | 16.41564 | 1 R.ATAGDGI chr3@5845   | 1.35E-11 | 4.45E-04 |
| 16Mar2011  | 309   | 748.36  | 16.41564 | 1 R.ATAGDGI chr3@5845   | 2.20E-10 | 0.004978 |
| 16Mar2011  | 14953 | 1183.61 | -27.6477 | 2 K.ILYIHIDFL chrX@4350 | 2.58E-10 | 0.007901 |
| 16Mar2011  | 23708 | 804.81  | 6.20471  | 3 K.KFLISSKK chr5@1797  | 8.63E-11 | 0.003166 |
| 16Mar2011  | 5811  | 734.43  | 17.44823 | 2 C.FKADNAk Splice@chr  | 6.12E-10 | 0.009252 |
| 16Mar2011  | 7021  | 748.39  | -27.6021 | 2 K.QKSNWH chr5@1229    | 3.96E-11 | 5.74E-04 |
| 16Mar2011  | 6974  | 748.39  | -27.6021 | 2 K.QKSNWH chr5@1229    | 2.97E-11 | 4.67E-04 |
| 16Mar2011  | 7322  | 748.39  | -27.6021 | 2 K.QKSNWH chr5@1229    | 3.19E-11 | 0.001365 |
| 16Mar2011  | 6236  | 748.39  | -27.6021 | 2 K.QKSNWH chr5@1229    | 8.41E-11 | 0.002577 |
| 16Mar2011  | 6190  | 748.39  | -27.6021 | 2 K.QKSNWH chr5@1229    | 7.77E-12 | 4.24E-04 |
| 16Mar2011  | 5959  | 748.39  | -27.6021 | 2 K.QKSNWH chr5@1229    | 3.08E-11 | 7.12E-04 |
| 16Mar2011  | 6244  | 748.39  | -27.6021 | 2 K.QKSNWH chr5@1229    | 5.44E-11 | 0.001878 |
| 16Mar2011  | 6295  | 748.39  | -27.6021 | 2 K.QKSNWH chr5@1229    | 4.33E-11 | 0.001766 |
| 16Mar2011  | 5428  | 748.39  | -27.6021 | 2 K.QKSNWH chr5@1229    | 2.02E-11 | 9.87E-04 |
| 16Mar2011  | 5373  | 748.39  | -27.6021 | 2 K.QKSNWH chr5@1229    | 2.44E-11 | 0.00112  |
| 16Mar2011  | 6794  | 748.39  | -27.6021 | 2 K.QKSNWH chr5@1229    | 9.06E-12 | 1.34E-04 |
| 16Mar2011  | 6848  | 748.39  | -27.6021 | 2 K.QKSNWH chr5@1229    | 4.62E-12 | 0        |
| 16Mar2011  | 4963  | 748.39  | -27.6021 | 2 K.QKSNWH chr5@1229    | 3.27E-11 | 9.34E-04 |
| 16Mar2011  | 5010  | 748.39  | -27.6021 | 2 K.QKSNWH chr5@1229    | 3.59E-11 | 0.001286 |
| 16Mar2011  | 6651  | 748.39  | -27.6021 | 2 K.QKSNWH chr5@1229    | 5.26E-11 | 7.73E-04 |
| 16Mar2011  | 6706  | 748.39  | -27.6021 | 2 K.QKSNWH chr5@1229    | 5.60E-11 | 8.97E-04 |
| 16Mar2011  | 6850  | 748.39  | -27.6021 | 2 K.QKSNWH chr5@1229    | 1.04E-10 | 0.004029 |
| 16Mar2011  | 6909  | 748.39  | -27.6021 | 2 K.QKSNWH chr5@1229    | 3.39E-11 | 0.001538 |
| 16Mar2011  | 5829  | 748.39  | -27.6021 | 2 K.QKSNWH chr5@1229    | 9.59E-11 | 0.001864 |
| 16Mar2011  | 5878  | 748.39  | -27.6021 | 2 K.QKSNWH chr5@1229    | 7.30E-11 | 0.001738 |
| 16Mar2011  | 2114  | 513.27  | 11.09387 | 2 K.RYSQTDV chr2@9862   | 2.36E-10 | 0.006336 |
| 16Mar2011  | 16848 | 743.39  | -25.8721 | 2 R.LK+14.01 chr5@1607  | 2.07E-10 | 0.003191 |
| 16Mar2011  | 16237 | 743.39  | -25.8721 | 2 R.LK+14.01 chr5@1607  | 3.51E-10 | 0.008551 |
| 16Mar2011  | 2196  | 416.26  | 8.37812  | 2 R.RGSVSVV chr5@2014   | 5.04E-10 | 0.009296 |
| 13July2011 | 4275  | 551.3   | -12.3113 | 2 L.LVSYHGA chrX@4675   | 2.51E-10 | 0.005293 |
| 16Mar2011  | 21905 | 890.94  | 2.574566 | 2 R.YRYLYSSk chr5@1717  | 1.82E-10 | 0.007836 |
| 16Mar2011  | 21632 | 1083.54 | 8.941736 | 2 R.REVTWEI chr1@4297   | 4.67E-10 | 0.008571 |
| 16Mar2011  | 3999  | 469.74  | 26.75955 | 2 K.YLEGKAE Splice@chr  | 3.64E-10 | 0.007428 |
| 16Mar2011  | 11097 | 606.34  | -12.1581 | 2 C.AK+14.01 chr2@2907  | 4.05E-10 | 0.009888 |

|            |       |         |          |                         |          |          |
|------------|-------|---------|----------|-------------------------|----------|----------|
| 16Mar2011  | 12873 | 606.34  | -12.1581 | 2 C.AK+14.01 chr2@2907  | 3.13E-10 | 0.007899 |
| 16Mar2011  | 17428 | 1128.59 | -6.14541 | 2 K.IARNCVV chrX@1027   | 3.82E-10 | 0.008364 |
| 16Mar2011  | 15712 | 884.93  | -29.6719 | 2 K.CWSKKN chr5@1270    | 1.48E-10 | 0.004681 |
| 16Mar2011  | 1392  | 423.26  | 23.30279 | 2 _KPKGGTE chr5@1287    | 4.76E-11 | 0.001863 |
| 16Mar2011  | 15969 | 979.51  | -28.8585 | 3 R.SYVEATL chr5@1476   | 6.72E-12 | 6.18E-04 |
| 16Mar2011  | 13384 | 864.44  | -25.9914 | 2 K.LKCSFPM chr5@1595   | 3.37E-10 | 0.009518 |
| 16Mar2011  | 13715 | 563.86  | -24.1467 | 2 R.QNK+14. Splice@chr  | 1.55E-10 | 0.003227 |
| 16Mar2011  | 2061  | 717.35  | -0.34082 | 2 R.DQQSFRI Splice@chr  | 3.92E-10 | 0.008174 |
| 16Mar2011  | 8547  | 862.48  | -24.8232 | 1 R.KMRIADk chr4@1395   | 3.38E-10 | 0.008811 |
| 16Mar2011  | 7889  | 862.48  | -24.8232 | 1 R.KMRIADk chr4@1395   | 2.59E-10 | 0.003674 |
| 16Mar2011  | 10277 | 862.48  | -24.8232 | 1 R.KMRIADk chr4@1395   | 2.37E-10 | 0.006336 |
| 16Mar2011  | 22451 | 1070.09 | -0.34255 | 2 R.RCCRLKV chr3@8327   | 6.52E-11 | 0.002275 |
| 16Mar2011  | 21351 | 762.91  | -29.6394 | 2 _TMYAIVK chr4@1217    | 7.14E-11 | 0.002275 |
| 16Mar2011  | 20661 | 762.91  | -29.6394 | 2 _TMYAIVK chr4@1217    | 1.66E-10 | 0.005118 |
| 16Mar2011  | 1228  | 448.75  | -3.6124  | 2 R.AIHNLN chr2@5747    | 3.31E-10 | 0.005985 |
| 16Mar2011  | 5730  | 573.37  | -14.7801 | 2 K.EKKIFIPK chrX@1437  | 1.20E-10 | 0.003616 |
| 16Mar2011  | 4099  | 573.37  | -14.7801 | 2 K.EKKIFIPK chrX@1437  | 2.46E-10 | 0.003406 |
| 16Mar2011  | 3847  | 1010.51 | 4.05088  | 1 R.FFADNV chr1@1245    | 3.54E-10 | 0.009801 |
| 16Mar2011  | 17805 | 506.76  | 1.810232 | 2 _DFLNFTQ Splice@chr   | 1.27E-10 | 0.003773 |
| 16Mar2011  | 15457 | 820.39  | -23.8985 | 4 R.TTGVLVD Splice@chr  | 2.87E-11 | 0.001054 |
| 13July2011 | 12116 | 716.36  | -4.75759 | 4 R.QLQSFFR chrX@7858   | 3.33E-10 | 0.008137 |
| 16Mar2011  | 948   | 672.36  | 14.91008 | 2 R.M+15.99 Splice@chr  | 3.73E-10 | 0.008503 |
| 16Mar2011  | 17651 | 933.21  | -16.3683 | 4 K.FLANRQM chr3@1171   | 4.18E-10 | 0.007835 |
| 13July2011 | 12562 | 779.18  | 26.61871 | 4 K.EVRDNYK chr5@7876   | 8.83E-11 | 0.002703 |
| 16Mar2011  | 18262 | 677.61  | 5.437891 | 4 K.ESIVSVLT chrX@9696  | 5.86E-11 | 0.001943 |
| 16Mar2011  | 13235 | 677.61  | 5.437891 | 4 K.ESIVSVLT chrX@9696  | 3.35E-10 | 0.008081 |
| 16Mar2011  | 17160 | 677.61  | 5.437891 | 4 K.ESIVSVLT chrX@9696  | 1.47E-10 | 0.002719 |
| 16Mar2011  | 22762 | 1153.94 | -17.8578 | 3 R.WSENQE chr5@1808    | 2.99E-10 | 0.00533  |
| 16Mar2011  | 7385  | 789.41  | 13.47061 | 1 R.DLSSSALF chr2@3718  | 2.49E-10 | 0.009844 |
| 16Mar2011  | 18619 | 1032.52 | 1.183413 | 1 R.DFDHILM chr5@1325   | 1.07E-10 | 0.004061 |
| 16Mar2011  | 16961 | 575.97  | 16.41892 | 3 K.TSASGEE Splice@chr  | 2.71E-11 | 9.72E-04 |
| 16Mar2011  | 23713 | 1078.55 | 21.11076 | 2 K.NYSKNKK chrX@3592   | 4.43E-10 | 0.007911 |
| 13July2011 | 2195  | 581.3   | -5.46933 | 2 R.CSPRCRI chr4@7867   | 1.27E-10 | 0.003932 |
| 16Mar2011  | 16113 | 739.39  | -0.08266 | 2 R.VDETLILC chr2@8606  | 8.95E-12 | 1.28E-04 |
| 16Mar2011  | 16054 | 739.39  | -0.08266 | 2 R.VDETLILC gi 3928905 | 3.39E-12 | 1.28E-04 |
| 16Mar2011  | 14655 | 739.39  | -0.08266 | 2 R.VDETLILC gi 3928905 | 3.61E-13 | 0        |
| 16Mar2011  | 13937 | 739.39  | -0.08266 | 2 R.VDETLILC gi 3928905 | 3.78E-12 | 3.08E-04 |
| 16Mar2011  | 14464 | 739.39  | -0.08266 | 2 R.VDETLILC gi 3928905 | 5.29E-13 | 0        |
| 16Mar2011  | 14415 | 739.38  | -13.639  | 2 R.VDETLILC gi 3928905 | 8.23E-12 | 3.33E-04 |
| 16Mar2011  | 13336 | 739.39  | -0.08266 | 2 R.VDETLILC gi 3928905 | 2.81E-12 | 1.81E-04 |
| 16Mar2011  | 16036 | 739.39  | -0.08266 | 2 R.VDETLILC gi 3928905 | 2.28E-12 | 3.64E-04 |
| 16Mar2011  | 16067 | 739.89  | -2.35438 | 2 R.VDETLILC gi 3928905 | 6.10E-12 | 3.65E-04 |
| 16Mar2011  | 16370 | 739.39  | -0.08266 | 2 R.VDETLILC gi 3928905 | 2.35E-12 | 0        |
| 16Mar2011  | 15971 | 739.39  | -0.08266 | 2 R.VDETLILC gi 3928905 | 1.73E-13 | 0        |
| 16Mar2011  | 15909 | 739.39  | -0.08266 | 2 R.VDETLILC gi 3928905 | 5.91E-12 | 0        |
| 16Mar2011  | 12108 | 739.39  | -0.08266 | 2 R.VDETLILC gi 3928905 | 1.43E-12 | 0        |
| 16Mar2011  | 12059 | 739.39  | -0.08266 | 2 R.VDETLILC gi 3928905 | 7.42E-12 | 6.18E-04 |

|            |       |         |          |                         |          |          |
|------------|-------|---------|----------|-------------------------|----------|----------|
| 16Mar2011  | 12471 | 739.39  | -0.08266 | 2 R.VDETLILC gi 3928909 | 7.48E-12 | 0        |
| 16Mar2011  | 12420 | 739.39  | -0.08266 | 2 R.VDETLILC gi 3928909 | 4.79E-12 | 0        |
| 16Mar2011  | 15426 | 739.39  | -0.08266 | 2 R.VDETLILC gi 3928909 | 4.13E-12 | 0        |
| 16Mar2011  | 15371 | 739.39  | -0.08266 | 2 R.VDETLILC gi 3928909 | 2.44E-13 | 0        |
| 16Mar2011  | 15642 | 739.39  | -0.08266 | 2 R.VDETLILC gi 3928909 | 2.62E-12 | 1.60E-04 |
| 16Mar2011  | 15583 | 739.39  | -0.08266 | 2 R.VDETLILC chr2@8606  | 4.22E-13 | 0        |
| 16Mar2011  | 13711 | 739.39  | -0.08266 | 2 R.VDETLILC gi 3928909 | 1.56E-11 | 2.96E-04 |
| 13July2011 | 11847 | 622.32  | 18.92714 | 3 R.IERFGLFE chr3@8521  | 2.90E-10 | 0.006853 |
| 16Mar2011  | 16557 | 983.46  | -3.78963 | 2 R.SFSTIPDS chr2@1305  | 3.15E-14 | 0        |
| 16Mar2011  | 16770 | 983.96  | -5.49698 | 2 R.SFSTIPDS chr2@1305  | 3.46E-16 | 0        |
| 16Mar2011  | 15215 | 983.96  | -5.49698 | 2 R.SFSTIPDS chr2@1305  | 2.74E-16 | 0        |
| 16Mar2011  | 15154 | 983.96  | -5.49698 | 2 R.SFSTIPDS chr2@1305  | 4.22E-18 | 0        |
| 16Mar2011  | 14257 | 983.47  | 6.336758 | 2 R.SFSTIPDS chr2@1305  | 2.94E-14 | 0        |
| 16Mar2011  | 12818 | 983.96  | -5.49698 | 2 R.SFSTIPDS Splice@chr | 1.13E-14 | 0        |
| 16Mar2011  | 14163 | 983.96  | -5.49698 | 2 R.SFSTIPDS chr2@1305  | 1.89E-17 | 0        |
| 16Mar2011  | 5198  | 805.42  | -29.245  | 1 K.KMGGGN chr5@9928    | 1.89E-10 | 0.006042 |
| 16Mar2011  | 5334  | 805.42  | -29.245  | 1 K.KMGGGN chr5@9928    | 8.14E-11 | 0.003564 |
| 16Mar2011  | 848   | 403.21  | 15.42502 | 2 K.EGGGGG chrX@1217    | 2.68E-10 | 0.006017 |
| 16Mar2011  | 807   | 403.21  | 15.42502 | 2 K.EGGGGG chrX@1217    | 2.12E-12 | 1.76E-04 |
| 16Mar2011  | 18685 | 855.42  | -10.6676 | 3 K.MFGFAV Splice@chr   | 4.12E-10 | 0.008725 |
| 16Mar2011  | 17087 | 965.53  | -24.9753 | 2 D.DRICLIGF Splice@chr | 1.47E-10 | 0.003831 |
| 16Mar2011  | 12891 | 778.39  | 12.77173 | 3 R.LNWSCM chr5@1814    | 3.16E-10 | 0.009401 |
| 16Mar2011  | 3542  | 419.21  | -3.21081 | 3 R.RGASFFA chr3@1105   | 5.20E-12 | 1.94E-04 |
| 16Mar2011  | 2754  | 689.35  | 9.133072 | 2 A.EDAGSAI chrX@1340   | 4.82E-10 | 0.009851 |
| 16Mar2011  | 13441 | 923.98  | 0.695895 | 2 T.PCFALNV chr4@1557   | 3.33E-10 | 0.006729 |
| 16Mar2011  | 12846 | 780.03  | -24.5321 | 3 ?.AQDN YM Splice@chr  | 1.33E-10 | 0.003865 |
| 16Mar2011  | 6708  | 734.43  | 10.70263 | 2 L.TEQSVFK chr5@2036   | 2.06E-10 | 0.004174 |
| 16Mar2011  | 13507 | 882.47  | 10.84405 | 2 K.KNNLFHL chr4@8500   | 5.70E-11 | 0.00125  |
| 16Mar2011  | 11021 | 532.32  | 20.88412 | 3 R.RGGFTLA chrX@1295   | 2.21E-10 | 0.005895 |
| 16Mar2011  | 16874 | 920     | -22.8463 | 2 Q.EGEQKG Splice@chr   | 3.62E-10 | 0.007241 |
| 16Mar2011  | 9004  | 761.45  | -15.4905 | 2 K.FIEQK+14 chrX@1760  | 1.21E-11 | 6.72E-04 |
| 16Mar2011  | 311   | 565.27  | -6.05738 | 2 _RSEFSSNI chr1@1388   | 7.60E-11 | 0.001874 |
| 16Mar2011  | 18887 | 819.48  | -3.09532 | 2 F.EFLIK+14 chr5@1080  | 9.68E-11 | 0.003166 |
| 16Mar2011  | 9175  | 438.91  | -18.0263 | 3 _KNDKKT chr2@4168     | 4.02E-10 | 0.008535 |
| 16Mar2011  | 9403  | 438.91  | -18.0263 | 3 _KNDKKT chr2@4168     | 3.69E-10 | 0.008752 |
| 16Mar2011  | 1431  | 441.27  | -21.8568 | 2 R.LTHVVR chr4@1736    | 3.91E-10 | 0.007542 |
| 16Mar2011  | 6173  | 492.24  | 6.158842 | 2 R.M+15.99 Splice@chr  | 9.73E-11 | 0.001801 |
| 16Mar2011  | 13546 | 617.98  | -7.84814 | 3 K.LTNLSTA Splice@chr  | 2.11E-10 | 0.004959 |
| 16Mar2011  | 13494 | 618.32  | 1.155298 | 3 K.LTNLSTA Splice@chr  | 4.06E-10 | 0.007746 |
| 16Mar2011  | 11120 | 618.32  | 1.155298 | 3 K.LTNLSTA Splice@chr  | 6.46E-11 | 0.002304 |
| 16Mar2011  | 12561 | 618.32  | 1.155298 | 3 K.LTNLSTA Splice@chr  | 1.08E-10 | 0.002112 |
| 16Mar2011  | 12872 | 1086.59 | -0.78713 | 1 R.STAALRSI chr1@7028  | 3.09E-10 | 0.006195 |
| 16Mar2011  | 9503  | 669.85  | -27.1664 | 2 K.RSTIFDK+ chrX@1330  | 3.71E-10 | 0.00683  |
| 16Mar2011  | 22252 | 598.64  | 12.32363 | 3 T.FQGVLDM Splice@chr  | 2.57E-10 | 0.007901 |
| 16Mar2011  | 8305  | 599.32  | -23.327  | 2 R.FTGFELE chrX@1690   | 1.22E-10 | 0.001934 |
| 16Mar2011  | 15730 | 747.39  | 13.7081  | 2 K.MLRFNEC chr2@8355   | 3.25E-10 | 0.006626 |
| 16Mar2011  | 14850 | 747.39  | 13.7081  | 2 K.MLRFNEC chr2@8355   | 1.44E-10 | 0.003831 |

|            |       |         |          |                        |          |          |
|------------|-------|---------|----------|------------------------|----------|----------|
| 16Mar2011  | 14251 | 747.39  | 13.7081  | 2 K.MLRFNE( chr2@835   | 4.00E-10 | 0.009763 |
| 16Mar2011  | 12837 | 747.39  | 13.7081  | 2 K.MLRFNE( chr2@835   | 2.46E-10 | 0.006796 |
| 16Mar2011  | 13321 | 747.4   | 27.12835 | 2 K.MLRFNE( chr2@835   | 2.37E-10 | 0.003406 |
| 16Mar2011  | 16542 | 747.39  | 13.7081  | 2 K.MLRFNE( chr2@835   | 3.79E-10 | 0.00813  |
| 16Mar2011  | 16485 | 747.39  | 13.7081  | 2 K.MLRFNE( chr2@835   | 3.90E-10 | 0.008327 |
| 16Mar2011  | 14657 | 747.39  | 13.7081  | 2 K.MLRFNE( chr2@835   | 1.14E-10 | 0.00236  |
| 16Mar2011  | 19699 | 966.49  | -14.1983 | 2 R.KFK+14.0 chr3@948  | 3.29E-10 | 0.005985 |
| 16Mar2011  | 1765  | 506.77  | -14.421  | 2 __.VDKNVYF chr4@119  | 2.87E-10 | 0.007569 |
| 16Mar2011  | 1523  | 461.89  | -3.4432  | 3 R.HYSTPQF chr2@130   | 9.87E-14 | 0        |
| 13July2011 | 38    | 552.93  | -10.5425 | 3 K.KM+15.9 chr2@119   | 1.50E-10 | 0.004927 |
| 16Mar2011  | 1628  | 491.25  | -11.5369 | 3 K.CK+14.01 chr3@425  | 1.21E-11 | 3.96E-04 |
| 13July2011 | 14459 | 807.07  | -13.912  | 3 K.LSLIYSGV chrX@175  | 1.45E-10 | 0.003255 |
| 16Mar2011  | 16564 | 920.49  | 25.68969 | 1 K.HQLYTMI Splice@chr | 2.90E-10 | 0.005765 |
| 16Mar2011  | 11065 | 483.27  | 15.82026 | 2 R.FGRSASG chr1@478   | 1.02E-10 | 0.003053 |
| 16Mar2011  | 13666 | 657.38  | -23.6186 | 2 K.LNVDWLI Splice@chr | 5.54E-10 | 0.009936 |
| 16Mar2011  | 15579 | 1188.64 | -26.8108 | 2 N.RPSFSRG chr5@187   | 5.27E-11 | 0.001994 |
| 13July2011 | 4007  | 422.23  | 12.13479 | 3 R.TLFNDEG chr4@108   | 2.17E-10 | 0.005611 |
| 16Mar2011  | 21315 | 791.44  | -2.89613 | 2 R.ERRGHTk chr1@765   | 3.33E-10 | 0.005985 |
| 16Mar2011  | 18794 | 791.43  | -15.5678 | 2 R.ERRGHTk chr1@765   | 2.34E-10 | 0.005156 |
| 16Mar2011  | 18883 | 791.43  | -15.5678 | 2 R.ERRGHTk chr1@765   | 5.87E-11 | 0.001761 |
| 16Mar2011  | 17613 | 791.44  | -2.89613 | 2 R.ERRGHTk chr1@765   | 1.61E-10 | 0.004071 |
| 16Mar2011  | 17593 | 791.44  | -2.89613 | 2 R.ERRGHTk chr1@765   | 2.06E-10 | 0.004978 |
| 16Mar2011  | 17508 | 791.44  | -2.89613 | 2 R.ERRGHTk chr1@765   | 1.78E-10 | 0.0048   |
| 16Mar2011  | 18447 | 791.44  | -2.89613 | 2 R.ERRGHTk chr1@765   | 1.51E-10 | 0.00427  |
| 16Mar2011  | 18550 | 791.44  | -2.89613 | 2 R.ERRGHTk chr1@765   | 1.99E-10 | 0.005081 |
| 16Mar2011  | 18523 | 791.43  | -15.5678 | 2 R.ERRGHTk chr1@765   | 1.15E-10 | 0.003548 |
| 16Mar2011  | 17396 | 791.44  | -2.89613 | 2 R.ERRGHTk chr1@765   | 6.60E-11 | 0.002409 |
| 16Mar2011  | 17483 | 791.44  | -2.89613 | 2 R.ERRGHTk chr1@765   | 1.36E-10 | 0.004145 |
| 16Mar2011  | 17370 | 791.44  | -2.89613 | 2 R.ERRGHTk chr1@765   | 3.89E-10 | 0.009763 |
| 16Mar2011  | 17523 | 791.44  | -2.89613 | 2 R.ERRGHTk chr1@765   | 5.21E-11 | 0.001994 |
| 16Mar2011  | 21215 | 791.44  | -2.89613 | 2 R.ERRGHTk chr1@765   | 1.98E-10 | 0.004514 |
| 16Mar2011  | 21983 | 791.44  | -2.89613 | 2 R.ERRGHTk chr1@765   | 1.90E-10 | 0.007316 |
| 16Mar2011  | 21881 | 791.44  | -2.89613 | 2 R.ERRGHTk chr1@765   | 2.33E-10 | 0.009123 |
| 16Mar2011  | 21232 | 791.44  | -2.89613 | 2 R.ERRGHTk chr1@765   | 2.34E-10 | 0.007234 |
| 16Mar2011  | 21086 | 791.44  | -2.89613 | 2 R.ERRGHTk chr1@765   | 2.69E-10 | 0.008275 |
| 16Mar2011  | 21120 | 791.44  | -2.89613 | 2 R.ERRGHTk chr1@765   | 8.14E-11 | 0.002749 |
| 16Mar2011  | 15231 | 791.44  | -2.89613 | 2 R.ERRGHTk chr1@765   | 1.01E-10 | 0.003435 |
| 16Mar2011  | 15175 | 791.44  | -2.89613 | 2 R.ERRGHTk chr1@765   | 1.34E-10 | 0.004675 |
| 16Mar2011  | 19958 | 791.44  | -2.89613 | 2 R.ERRGHTk chr1@765   | 3.19E-10 | 0.006884 |
| 16Mar2011  | 19994 | 791.44  | -2.89613 | 2 R.ERRGHTk chr1@765   | 1.38E-10 | 0.002719 |
| 16Mar2011  | 20056 | 791.44  | -2.89613 | 2 R.ERRGHTk chr1@765   | 1.48E-10 | 0.002719 |
| 16Mar2011  | 20088 | 791.44  | -2.89613 | 2 R.ERRGHTk chr1@765   | 1.50E-10 | 0.002719 |
| 16Mar2011  | 17725 | 791.44  | -2.89613 | 2 R.ERRGHTk chr1@765   | 3.64E-11 | 5.76E-04 |
| 16Mar2011  | 18888 | 1096.12 | 19.95323 | 2 T.RVDLYHA Splice@chr | 3.47E-10 | 0.007914 |
| 16Mar2011  | 20502 | 968.52  | 11.01521 | 2 W.AVTDGC Splice@chr  | 1.78E-13 | 0        |
| 13July2011 | 15958 | 848.45  | -2.01663 | 1 K.TPTQYPK chr4@268   | 3.21E-10 | 0.009773 |
| 13July2011 | 9033  | 815.01  | -27.8779 | 3 P.MPMPM chrX@141     | 2.20E-10 | 0.004796 |

|            |       |         |          |                         |          |          |
|------------|-------|---------|----------|-------------------------|----------|----------|
| 16Mar2011  | 3681  | 479.26  | -5.7174  | 5 R.RRRAPIG chr1@992    | 2.04E-10 | 0.003831 |
| 16Mar2011  | 11867 | 501.8   | -2.49848 | 2 K.TTAQLLT chrX@679    | 3.27E-10 | 0.009611 |
| 16Mar2011  | 17916 | 846.44  | -26.8126 | 1 R.GTNEIRR chr1@517    | 5.48E-10 | 0.008401 |
| 16Mar2011  | 21389 | 991.48  | 13.24897 | 2 R.GEEMRMV chrX@158    | 3.47E-10 | 0.007634 |
| 16Mar2011  | 3346  | 401.74  | -8.14847 | 2 R.AIGLVSSF chr2@101   | 1.99E-10 | 0.005283 |
| 16Mar2011  | 3155  | 401.74  | -8.14847 | 2 R.AIGLVSSF chr2@101   | 1.99E-10 | 0.004514 |
| 16Mar2011  | 10776 | 1055.51 | -0.43329 | 2 R.QAADGT Splice@chr   | 6.58E-22 | 0        |
| 16Mar2011  | 10674 | 1055.51 | -0.43329 | 2 R.QAADGT Splice@chr   | 1.81E-13 | 0        |
| 16Mar2011  | 4476  | 634.34  | -25.9233 | 2 K.K+14.016 chr2@130   | 4.69E-10 | 0.006903 |
| 16Mar2011  | 17980 | 914.24  | 13.7012  | 4 K.FPAISSTF chr2@275   | 4.46E-10 | 0.008809 |
| 16Mar2011  | 17946 | 914.24  | 13.7012  | 4 K.FPAISSTF chr2@275   | 4.98E-11 | 0.001399 |
| 16Mar2011  | 6006  | 566.28  | -24.4017 | 2 R.IRDVESYI chr1@373   | 3.64E-10 | 0.009045 |
| 16Mar2011  | 20075 | 984.55  | -3.29016 | 1 R.TKNTHRA chr1@914    | 7.33E-11 | 0.002673 |
| 13July2011 | 4847  | 552.77  | 15.70809 | 2 K.LIEFSCQA chr1@114   | 1.46E-10 | 0.003255 |
| 16Mar2011  | 17420 | 1104.83 | 4.296498 | 3 S.EDLGSDA chr5@752    | 2.87E-22 | 0        |
| 16Mar2011  | 17376 | 1104.82 | -4.70082 | 3 S.EDLGSDA chr5@752    | 1.71E-22 | 0        |
| 16Mar2011  | 16370 | 828.87  | -1.01339 | 4 S.EDLGSDA Splice@chr  | 3.36E-10 | 0.007485 |
| 16Mar2011  | 16354 | 1104.82 | -4.70082 | 3 S.EDLGSDA chr5@752    | 3.87E-17 | 0        |
| 16Mar2011  | 12114 | 948.44  | -2.02922 | 2 K.K+14.016 Splice@chr | 3.41E-10 | 0.006941 |
| 16Mar2011  | 20866 | 861.01  | 21.6466  | 2 R.QIK+14.0 chr2@444   | 3.46E-10 | 0.007634 |
| 13July2011 | 12108 | 426.92  | 29.61715 | 3 K.FTK+14.0 chr4@755   | 1.53E-10 | 0.004843 |
| 16Mar2011  | 22192 | 770.38  | 4.451156 | 1 R.GYTVDSK chr1@199    | 4.51E-10 | 0.007911 |
| 16Mar2011  | 21266 | 872.44  | 18.67801 | 2 R.RK+14.01 chr5@683   | 1.32E-10 | 0.006202 |
| 16Mar2011  | 16290 | 874.98  | 18.48393 | 2 K.NSKVSLN chrX@501    | 5.06E-10 | 0.007419 |
| 16Mar2011  | 8030  | 741.9   | 6.967377 | 2 K.KLEEKVK- chrX@426   | 2.60E-10 | 0.007654 |
| 16Mar2011  | 15330 | 726.39  | -15.6174 | 2 K.HK+14.01 chr2@131   | 2.08E-10 | 0.004174 |
| 16Mar2011  | 20254 | 694.87  | 2.550973 | 2 K.YHNITLQ chrX@383    | 1.03E-10 | 0.003282 |
| 16Mar2011  | 22384 | 745.75  | -13.5497 | 3 _KTIDLAGI Splice@chr  | 2.70E-10 | 0.00553  |
| 16Mar2011  | 13539 | 1042.55 | 20.23923 | 1 R.YLELDNFI Splice@chr | 7.83E-11 | 0.00143  |
| 16Mar2011  | 13587 | 1042.55 | 20.23923 | 1 R.YLELDNFI Splice@chr | 7.23E-11 | 0.001108 |
| 16Mar2011  | 13492 | 1042.55 | 20.23923 | 1 R.YLELDNFI Splice@chr | 2.93E-11 | 4.67E-04 |
| 16Mar2011  | 13971 | 1042.55 | 20.23923 | 1 R.YLELDNFI Splice@chr | 6.48E-11 | 0.002221 |
| 16Mar2011  | 13912 | 1042.55 | 20.23923 | 1 R.YLELDNFI Splice@chr | 4.14E-11 | 0.001482 |
| 16Mar2011  | 12300 | 1042.55 | 20.23923 | 1 R.YLELDNFI Splice@chr | 2.57E-11 | 0.001054 |
| 16Mar2011  | 11247 | 1042.55 | 20.23923 | 1 R.YLELDNFI Splice@chr | 2.49E-11 | 0.00112  |
| 16Mar2011  | 13592 | 1042.55 | 20.23923 | 1 R.YLELDNFI Splice@chr | 1.27E-10 | 0.006104 |
| 16Mar2011  | 13641 | 1042.55 | 20.23923 | 1 R.YLELDNFI Splice@chr | 4.93E-11 | 0.002717 |
| 16Mar2011  | 13694 | 1042.55 | 20.23923 | 1 R.YLELDNFI Splice@chr | 1.29E-10 | 0.006104 |
| 16Mar2011  | 13953 | 1042.55 | 20.23923 | 1 R.YLELDNFI Splice@chr | 2.62E-11 | 7.68E-04 |
| 16Mar2011  | 13296 | 1042.55 | 20.23923 | 1 R.YLELDNFI Splice@chr | 1.66E-11 | 5.17E-04 |
| 16Mar2011  | 13343 | 1042.55 | 20.23923 | 1 R.YLELDNFI Splice@chr | 3.59E-11 | 0.001218 |
| 16Mar2011  | 13116 | 1042.55 | 20.23923 | 1 R.YLELDNFI Splice@chr | 3.43E-11 | 3.92E-04 |
| 16Mar2011  | 13149 | 1042.55 | 20.23923 | 1 R.YLELDNFI Splice@chr | 7.71E-12 | 3.16E-04 |
| 16Mar2011  | 13100 | 1042.55 | 20.23923 | 1 R.YLELDNFI Splice@chr | 4.08E-11 | 0.001671 |
| 16Mar2011  | 17614 | 978.99  | 0.312046 | 2 R.HYLLNLPI Splice@chr | 2.94E-11 | 0.001245 |
| 16Mar2011  | 17310 | 875.45  | -14.518  | 2 R.PPTSGST chr2@121    | 3.43E-10 | 0.007485 |
| 16Mar2011  | 4895  | 599.35  | 18.1576  | 2 R.NSGIK+1 chr1@809    | 4.85E-11 | 5.20E-04 |

|            |       |         |          |                         |          |          |
|------------|-------|---------|----------|-------------------------|----------|----------|
| 13July2011 | 2594  | 422.99  | 18.05607 | 4 K.KNRMEG chr2@1380    | 2.68E-11 | 2.51E-04 |
| 13July2011 | 98    | 496.94  | 10.22338 | 3 R.KKGSNTC Splice@chr  | 1.92E-10 | 0.004472 |
| 16Mar2011  | 17047 | 751.38  | -7.12052 | 2 _CLDMFSF chr4@3959    | 1.31E-10 | 0.001908 |
| 16Mar2011  | 15523 | 751.38  | -7.12052 | 2 _CLDMFSF chr4@3959    | 1.21E-10 | 0.003578 |
| 16Mar2011  | 5430  | 827.51  | -29.7395 | 2 R.RKFPK+1. chrX@2963  | 5.52E-10 | 0.008401 |
| 16Mar2011  | 14743 | 874.45  | -11.0109 | 2 _RFDKEFN chr4@1323    | 1.68E-10 | 0.004442 |
| 16Mar2011  | 15462 | 921.99  | 12.83191 | 2 K.DHRIFGG chr5@8043   | 6.44E-11 | 0.002339 |
| 13July2011 | 5301  | 583.66  | 14.92    | 3 _NCEISSQ Splice@chr   | 2.91E-10 | 0.006148 |
| 16Mar2011  | 22480 | 1139.63 | -5.46762 | 2 R.LKVYAFL Splice@chr  | 1.45E-10 | 0.001999 |
| 13July2011 | 13026 | 619.99  | -29.4494 | 3 R.LVTVSEG chr4@9531   | 1.95E-10 | 0.006376 |
| 16Mar2011  | 9318  | 734.4   | -28.9375 | 2 V.PLLK+14. chr4@1306  | 2.15E-10 | 0.005895 |
| 16Mar2011  | 4007  | 544.81  | 1.571332 | 2 K.SNFQPV chr1@1327    | 2.90E-10 | 0.006244 |
| 16Mar2011  | 10726 | 834.47  | -4.35855 | 2 K.YFFKFSNI chr3@1090  | 2.15E-10 | 0.005924 |
| 16Mar2011  | 11894 | 834.47  | 24.14598 | 2 R.AEIEK+14 chr4@2263  | 4.11E-10 | 0.009075 |
| 16Mar2011  | 19722 | 990.04  | 19.37795 | 2 K.HECIFHH chrX@1051   | 3.83E-10 | 0.007542 |
| 16Mar2011  | 8037  | 921.47  | 18.50062 | 1 R.DLDDTSK chrX@7573   | 3.13E-11 | 9.34E-04 |
| 16Mar2011  | 8227  | 921.47  | 18.50062 | 1 R.DLDDTSK chrX@7573   | 2.37E-10 | 0.003406 |
| 16Mar2011  | 3489  | 598.82  | 8.02325  | 2 _MGQMQ chr3@1351      | 4.55E-10 | 0.009465 |
| 16Mar2011  | 21156 | 961.49  | -6.79942 | 2 _TCLRCITN Splice@chr  | 1.33E-10 | 0.00429  |
| 16Mar2011  | 12660 | 789.46  | 4.412467 | 4 K.PFNTLFLV chr4@7467  | 1.90E-10 | 0.002464 |
| 16Mar2011  | 23155 | 1024.53 | -6.41254 | 2 K.ENVRK+1 chrX@5454   | 1.23E-10 | 0.003725 |
| 16Mar2011  | 14092 | 887.56  | 15.00855 | 1 K.GGIKKAV chrX@1264   | 3.78E-10 | 0.007446 |
| 16Mar2011  | 2233  | 560.3   | -21.498  | 2 _PAFDTIGI Splice@chr  | 1.47E-10 | 0.004681 |
| 16Mar2011  | 1874  | 501.34  | 17.68876 | 2 K.KMIKAGL chr1@1904   | 2.31E-10 | 0.004525 |
| 16Mar2011  | 17825 | 895.92  | -18.2779 | 2 K.QCNVYFS chr1@1476   | 2.10E-10 | 0.003288 |
| 16Mar2011  | 22165 | 1047.06 | 2.482016 | 2 L.ESSQKIDL chr4@3516  | 3.64E-10 | 0.009888 |
| 16Mar2011  | 22146 | 1047.07 | 11.93897 | 2 L.ESSQKIDL chr4@3516  | 2.41E-10 | 0.007318 |
| 16Mar2011  | 19346 | 895.77  | -12.2594 | 3 _RELTEEDI Splice@chr  | 5.37E-11 | 8.92E-04 |
| 16Mar2011  | 19856 | 895.78  | -1.06827 | 3 _RELTEEDI Splice@chr  | 8.92E-12 | 1.28E-04 |
| 16Mar2011  | 19903 | 895.78  | -1.06827 | 3 _RELTEEDI Splice@chr  | 8.36E-12 | 1.28E-04 |
| 16Mar2011  | 20226 | 895.78  | -1.06827 | 3 _RELTEEDI Splice@chr  | 2.16E-11 | 9.72E-04 |
| 16Mar2011  | 207   | 474.27  | -11.3587 | 2 K.EAVQLKN chr1@4867   | 1.95E-10 | 0.003939 |
| 16Mar2011  | 23488 | 1015.53 | -2.00538 | 3 R.RK+14.01 chr5@2648  | 1.42E-10 | 0.005453 |
| 16Mar2011  | 21328 | 820.41  | -20.2602 | 2 K.FCK+14.0 chr4@9636  | 2.58E-10 | 0.007901 |
| 16Mar2011  | 17381 | 1193.1  | 3.407147 | 2 R.TFFDLAN chr1@3411   | 3.68E-11 | 0.001418 |
| 16Mar2011  | 10565 | 976.43  | -7.40623 | 3 K.EGEIVLAC Splice@chr | 6.75E-11 | 8.92E-04 |
| 16Mar2011  | 10775 | 976.44  | 2.859196 | 3 K.EGEIVLAC Splice@chr | 6.47E-11 | 0.002221 |
| 16Mar2011  | 11299 | 976.43  | -7.40623 | 3 K.EGEIVLAC Splice@chr | 2.44E-10 | 0.009748 |
| 16Mar2011  | 10737 | 976.43  | -7.40623 | 3 K.EGEIVLAC Splice@chr | 7.60E-11 | 0.002742 |
| 16Mar2011  | 10254 | 976.43  | -7.40623 | 3 K.EGEIVLAC Splice@chr | 4.16E-10 | 0.008725 |
| 13July2011 | 10854 | 632.85  | -22.6682 | 2 T.NNFK+14 chr2@3218   | 2.52E-10 | 0.006131 |
| 16Mar2011  | 19345 | 567.28  | -29.3684 | 3 T.RSSIIADS chr1@1057  | 2.98E-10 | 0.006341 |
| 16Mar2011  | 11942 | 596.68  | -18.3066 | 3 K.YVVILNG chrX@1642   | 2.14E-10 | 0.004643 |
| 16Mar2011  | 14504 | 833.44  | -19.4507 | 1 K.NLGTDG chr1@6646    | 3.09E-10 | 0.007103 |
| 16Mar2011  | 5363  | 468.27  | 4.528282 | 3 K.SIFYKK+1 chr2@4377  | 4.22E-10 | 0.008335 |
| 16Mar2011  | 16358 | 1067.55 | -21.7264 | 2 R.RVDKVLC Splice@chr  | 2.11E-10 | 0.005924 |
| 13July2011 | 10288 | 563.27  | -13.5689 | 2 K.MSARNY chrX@1045    | 2.33E-10 | 0.007562 |

|            |       |         |          |                         |          |          |
|------------|-------|---------|----------|-------------------------|----------|----------|
| 13July2011 | 10354 | 755.87  | 20.75522 | 2 K.LFFEYLCE chr5@9111  | 4.72E-11 | 0.00192  |
| 16Mar2011  | 441   | 471.76  | 0.194482 | 2 R.RSPAAPS chr1@1365   | 1.05E-10 | 0.001838 |
| 16Mar2011  | 13183 | 801.7   | -6.78619 | 3 K.FFKPNTD chr5@7527   | 9.27E-16 | 0        |
| 16Mar2011  | 13136 | 801.7   | -6.78619 | 3 K.FFKPNTD chr5@7527   | 1.28E-13 | 0        |
| 16Mar2011  | 12543 | 801.7   | -6.78619 | 3 K.FFKPNTD chr5@7527   | 2.82E-16 | 0        |
| 16Mar2011  | 12589 | 801.7   | -6.78619 | 3 K.FFKPNTD chr5@7527   | 3.41E-16 | 0        |
| 16Mar2011  | 12643 | 801.7   | -6.78619 | 3 K.FFKPNTD chr5@7527   | 1.92E-16 | 0        |
| 16Mar2011  | 12986 | 801.7   | -6.78619 | 3 K.FFKPNTD chr5@7527   | 1.39E-15 | 0        |
| 16Mar2011  | 17292 | 629.34  | -25.128  | 2 E.NVKNTV\ Splice@chr  | 3.69E-10 | 0.007557 |
| 16Mar2011  | 12787 | 708.38  | 4.10295  | 2 R.EQLDQGI Splice@chr  | 1.90E-10 | 0.002895 |
| 16Mar2011  | 12821 | 708.38  | 4.10295  | 2 R.EQLDQGI Splice@chr  | 4.36E-10 | 0.009436 |
| 16Mar2011  | 17608 | 649.34  | -20.3342 | 2 K.KSFFLFFF chr1@1965  | 3.87E-10 | 0.009655 |
| 16Mar2011  | 16067 | 511.65  | 18.08864 | 3 R.YGLSKRM chr2@1294   | 5.05E-10 | 0.007419 |
| 16Mar2011  | 7126  | 695.84  | -28.1085 | 2 K.KVEKNEN chr5@5337   | 2.22E-10 | 0.005831 |
| 13July2011 | 7636  | 635.37  | -0.04645 | 2 R.KMLTK+1 chr2@1325   | 3.30E-10 | 0.00777  |
| 16Mar2011  | 1936  | 657.91  | -22.3607 | 2 K.KK+14.01 Splice@chr | 3.02E-10 | 0.005421 |
| 16Mar2011  | 3393  | 593.86  | -29.0028 | 2 K.K+14.016 Splice@chr | 5.50E-10 | 0.009936 |
| 16Mar2011  | 8457  | 827.45  | 15.14008 | 1 R.SAHISAN chr4@5582   | 7.60E-11 | 0.002669 |
| 16Mar2011  | 10169 | 827.45  | 15.14008 | 1 R.SAHISAN chr4@5582   | 6.78E-11 | 0.002339 |
| 16Mar2011  | 12294 | 881.92  | -2.80647 | 2 F.LQEQGTY Splice@chr  | 9.17E-11 | 0.002798 |
| 16Mar2011  | 21002 | 1072.5  | -11.2543 | 2 R.NFINNSIE chr4@1705  | 4.01E-10 | 0.008535 |
| 16Mar2011  | 14648 | 1120.58 | -23.7686 | 2 T.RFNFNNTI\ chr2@1312 | 3.04E-10 | 0.008658 |
| 13July2011 | 8746  | 783.39  | -23.6118 | 2 K.KISHSGN chr3@1261   | 1.00E-10 | 0.004657 |
| 16Mar2011  | 8351  | 496.29  | -10.6595 | 2 R.EIKLFDVK Splice@chr | 3.40E-10 | 0.007485 |
| 16Mar2011  | 1620  | 801.46  | -26.9469 | 1 K.WAGVVL chr4@3665    | 2.88E-10 | 0.00533  |
| 16Mar2011  | 1259  | 801.46  | -26.9469 | 1 K.WAGVVL chr4@3665    | 3.45E-10 | 0.007042 |
| 16Mar2011  | 14876 | 881.98  | -17.5714 | 2 R.GVEVLQK Splice@chr  | 5.49E-10 | 0.008401 |
| 16Mar2011  | 7273  | 705.35  | 5.074513 | 2 K.M+15.99 chr5@9075   | 2.59E-10 | 0.004557 |
| 16Mar2011  | 22779 | 1118.25 | -21.7059 | 3 R.LVFCKRSI chr2@7565  | 2.63E-10 | 0.004557 |
| 13July2011 | 10694 | 679.37  | -15.1878 | 4 K.CIKVCAFI chr3@1310  | 3.14E-10 | 0.006822 |
| 16Mar2011  | 1641  | 531.32  | -4.14333 | 2 R.KKKTMRI chr2@6227   | 2.14E-10 | 0.008068 |
| 16Mar2011  | 2751  | 789.44  | 17.96022 | 1 R.FAAPLDR chr3@8971   | 3.84E-10 | 0.007574 |
| 16Mar2011  | 1561  | 405.21  | -4.37903 | 2 K.NFGKTDK chrX@1575   | 3.93E-10 | 0.009763 |
| 13July2011 | 14433 | 803.47  | 5.476339 | 3 _QSIKSEQ Splice@chr   | 1.16E-10 | 0.003546 |
| 16Mar2011  | 23350 | 874.75  | 22.20038 | 3 R.RREEGQC chr2@3438   | 3.21E-10 | 0.005802 |
| 16Mar2011  | 18107 | 913.98  | -22.5068 | 2 R.VFSCYKKI chr2@9245  | 2.99E-10 | 0.006696 |
| 16Mar2011  | 5213  | 430.75  | 0.781151 | 2 K.IMTTVGP Splice@chr  | 1.01E-10 | 0.003032 |
| 16Mar2011  | 17030 | 746.91  | -22.4202 | 2 I.SSNRLMN Splice@chr  | 2.29E-10 | 0.006298 |
| 16Mar2011  | 16270 | 746.91  | -22.4202 | 2 I.SSNRLMN Splice@chr  | 1.26E-10 | 0.004349 |
| 16Mar2011  | 10145 | 599.88  | 11.51674 | 2 K.TLK+14.0 chr5@1990  | 8.93E-11 | 0.00278  |
| 16Mar2011  | 12959 | 507.27  | 11.04446 | 2 R.STISQSP chr4@1345   | 1.80E-10 | 0.004881 |
| 16Mar2011  | 22503 | 1143.63 | 17.62784 | 2 K.VWESIEQ chrX@1282   | 3.09E-10 | 0.008959 |
| 16Mar2011  | 4680  | 634.3   | 1.644415 | 1 R.GGGGNS chr4@1694    | 3.93E-12 | 3.64E-04 |
| 16Mar2011  | 6571  | 557.3   | -15.7565 | 2 _LVQSIND Splice@chr   | 1.04E-10 | 0.003053 |
| 16Mar2011  | 19518 | 622.08  | 13.36542 | 4 R.RFCAPKT chrX@1320   | 3.97E-10 | 0.008433 |
| 16Mar2011  | 19458 | 622.08  | 13.36542 | 4 R.RFCAPKT chrX@1320   | 8.35E-11 | 0.001513 |
| 16Mar2011  | 20616 | 622.33  | 12.015   | 4 R.RFCAPKT chrX@1320   | 1.60E-10 | 0.006882 |

|            |       |         |          |                         |          |          |
|------------|-------|---------|----------|-------------------------|----------|----------|
| 16Mar2011  | 21334 | 622.33  | 12.015   | 4 R.RFCAPKT chrX@1320   | 1.33E-10 | 0.005023 |
| 16Mar2011  | 15078 | 622.08  | 13.36542 | 4 R.RFCAPKT chrX@1320   | 2.00E-10 | 0.002599 |
| 16Mar2011  | 15119 | 622.08  | 13.36542 | 4 R.RFCAPKT chrX@1320   | 6.63E-10 | 0.009506 |
| 16Mar2011  | 18736 | 622.08  | 13.36542 | 4 R.RFCAPKT chrX@1320   | 8.86E-11 | 0.001487 |
| 16Mar2011  | 19538 | 622.33  | 12.015   | 4 R.RFCAPKT chrX@1320   | 4.38E-10 | 0.008926 |
| 16Mar2011  | 18787 | 622.33  | 12.015   | 4 R.RFCAPKT chrX@1320   | 4.85E-10 | 0.009851 |
| 16Mar2011  | 19790 | 622.08  | 13.36542 | 4 R.RFCAPKT chrX@1320   | 1.09E-10 | 0.004147 |
| 16Mar2011  | 19748 | 622.33  | 12.015   | 4 R.RFCAPKT chrX@1320   | 5.96E-11 | 0.002438 |
| 13July2011 | 5647  | 695.37  | -7.55943 | 2 R.M+15.99 Splice@chr  | 1.78E-10 | 0.005414 |
| 16Mar2011  | 6956  | 492.3   | -8.13726 | 2 R.KNQKKLI Splice@chr  | 6.08E-10 | 0.009055 |
| 16Mar2011  | 15763 | 803.42  | -13.5393 | 2 R.PFM+15. chr1@1432   | 2.34E-10 | 0.009123 |
| 16Mar2011  | 13668 | 772.39  | -25.873  | 2 R.QFVEVH/ chr3@6909   | 2.84E-10 | 0.005919 |
| 16Mar2011  | 2232  | 557.3   | 3.13172  | 2 R.AIENLYHI chr5@9781  | 1.75E-10 | 0.005758 |
| 16Mar2011  | 1043  | 424.22  | -2.95648 | 2 K.KNPTEMI Splice@chr  | 1.19E-10 | 0.004606 |
| 13July2011 | 14013 | 745.37  | 14.43161 | 3 F.LRHM+15 chr2@1140   | 3.33E-10 | 0.009268 |
| 16Mar2011  | 14791 | 1071.61 | -13.9103 | 2 K.KFFFLKFL chr3@1224  | 7.02E-11 | 0.001079 |
| 13July2011 | 4781  | 552.35  | 28.23003 | 2 _KVKNTCL chrX@6981    | 8.61E-11 | 0.002703 |
| 13July2011 | 9916  | 814.06  | -6.68298 | 3 K.HRNEICT chrX@9828   | 1.07E-10 | 0.003135 |
| 16Mar2011  | 12270 | 1187.91 | -26.8667 | 3 K.NQPIHVF Splice@chr  | 1.59E-11 | 9.27E-04 |
| 16Mar2011  | 12326 | 1187.91 | -26.8667 | 3 K.NQPIHVF Splice@chr  | 1.71E-10 | 0.004627 |
| 16Mar2011  | 13927 | 1187.91 | -26.8667 | 3 K.NQPIHVF Splice@chr  | 2.16E-10 | 0.008176 |
| 16Mar2011  | 10417 | 1187.91 | -26.8667 | 3 K.NQPIHVF Splice@chr  | 3.62E-11 | 4.85E-04 |
| 16Mar2011  | 13259 | 1187.91 | -26.8667 | 3 K.NQPIHVF Splice@chr  | 1.26E-10 | 0.002408 |
| 16Mar2011  | 13202 | 1187.91 | -26.8667 | 3 K.NQPIHVF Splice@chr  | 7.87E-11 | 0.001376 |
| 16Mar2011  | 2918  | 927.44  | 16.60253 | 1 R.QMSFSAI chr1@1439   | 4.13E-11 | 0.001106 |
| 16Mar2011  | 11961 | 507.3   | -1.6873  | 2 K.LVVLYFM chr1@5194   | 1.44E-10 | 0.004178 |
| 16Mar2011  | 12022 | 507.3   | -1.6873  | 2 K.LVVLYFM chr1@5194   | 2.12E-10 | 0.005488 |
| 16Mar2011  | 16626 | 999.95  | -29.0216 | 2 R.EWATRE\ chrX@1796   | 2.85E-12 | 1.60E-04 |
| 16Mar2011  | 15621 | 833.44  | -21.0656 | 1 R.NLGVHHI chr2@1106   | 2.66E-10 | 0.00726  |
| 16Mar2011  | 5474  | 575.29  | 19.23719 | 2 R.QPSSSAD chr5@2031   | 1.94E-10 | 0.005706 |
| 16Mar2011  | 12188 | 466.27  | -16.7913 | 3 _K+14.016 chr4@8312   | 2.38E-10 | 0.007318 |
| 16Mar2011  | 68    | 420.22  | -19.7277 | 2 K.KNAQNH chr2@1322    | 4.61E-10 | 0.008289 |
| 16Mar2011  | 10621 | 547.33  | 10.27835 | 2 K.NVNLIIFI Splice@chr | 4.60E-11 | 7.94E-04 |
| 16Mar2011  | 6728  | 573.36  | 18.52035 | 2 _KGKLMK( chr5@1017    | 3.04E-10 | 0.006089 |
| 16Mar2011  | 10462 | 443.24  | -17.2689 | 2 K.PVVIDDA chrX@5274   | 3.00E-10 | 0.006089 |
| 16Mar2011  | 11111 | 443.24  | -17.2689 | 2 K.PVVIDDA chrX@5274   | 3.32E-10 | 0.008206 |
| 16Mar2011  | 887   | 748.36  | 16.41564 | 1 R.ATAGDGI chr3@5845   | 2.97E-11 | 5.76E-04 |
| 16Mar2011  | 16328 | 1003.18 | 7.145987 | 3 R.CWNRRA Splice@chr   | 1.23E-12 | 0        |
| 16Mar2011  | 5192  | 741.38  | -23.1647 | 2 K.FPENRHI chr2@1477   | 4.58E-10 | 0.009653 |
| 16Mar2011  | 13149 | 780.03  | -24.5321 | 3 ?.AQDNYM Splice@chr   | 9.75E-12 | 2.96E-04 |
| 16Mar2011  | 8115  | 438.91  | -18.0263 | 3 _KNDKKT( chr2@4168    | 2.52E-10 | 0.005005 |
| 16Mar2011  | 1320  | 657.91  | -22.3607 | 2 K.KK+14.01 Splice@chr | 2.80E-10 | 0.005829 |
| 16Mar2011  | 12746 | 1030.51 | 3.115089 | 2 L.SPIPEVPC Splice@chr | 1.10E-13 | 0        |
| 16Mar2011  | 224   | 743.48  | 2.794988 | 1 K.KIGGAGII chr1@2885  | 2.60E-10 | 0.005245 |
| 16Mar2011  | 13284 | 516.3   | 4.106203 | 3 R.NIIFLMVI chrX@1294  | 3.83E-10 | 0.007574 |
| 16Mar2011  | 14029 | 1005.47 | -16.3827 | 2 K.KVELALW Splice@chr  | 2.26E-22 | 0        |
| 16Mar2011  | 14072 | 669.35  | -28.2834 | 2 K.LEFNISK( chr1@1931  | 4.57E-12 | 1.94E-04 |

|           |       |         |          |                         |          |          |
|-----------|-------|---------|----------|-------------------------|----------|----------|
| 16Mar2011 | 11322 | 556.85  | -28.4079 | 2 R.QNKIVLIV Splice@chr | 2.67E-10 | 0.00706  |
| 16Mar2011 | 13805 | 747.39  | 13.7081  | 2 K.MLRFNEC chr2@835    | 7.15E-11 | 0.002252 |
| 16Mar2011 | 12056 | 1030.52 | 12.84278 | 2 L.SPIPEVPC Splice@chr | 7.23E-11 | 0.002252 |
| 16Mar2011 | 11267 | 556.85  | -28.4079 | 2 R.QNKIVLIV Splice@chr | 3.63E-10 | 0.009947 |
| 16Mar2011 | 5393  | 748.39  | -27.6021 | 2 K.QKSNWH chr5@122     | 1.88E-11 | 5.39E-04 |
| 16Mar2011 | 5928  | 553.33  | -3.70337 | 2 K.PQAKPNI chr5@900    | 4.06E-11 | 0.001667 |
| 16Mar2011 | 4742  | 741.38  | -23.1647 | 2 K.FPENRHI chr2@147    | 2.29E-10 | 0.006089 |
| 16Mar2011 | 13168 | 1004.96 | -24.6213 | 2 K.KVELALW Splice@chr  | 6.79E-22 | 0        |
| 16Mar2011 | 16196 | 634.84  | 6.410455 | 2 R.VDIGDILF Splice@chr | 5.25E-12 | 1.94E-04 |
| 16Mar2011 | 6425  | 533.82  | 16.26677 | 2 K.TNIYTILTI chr5@132  | 1.99E-10 | 0.004967 |
| 16Mar2011 | 5007  | 787.43  | -1.78505 | 1 K.SDAAPAK chrX@801    | 2.39E-11 | 7.03E-04 |
| 16Mar2011 | 14164 | 895.92  | -18.2779 | 2 K.QCNVYFS chr1@147    | 1.03E-10 | 0.002989 |
| 16Mar2011 | 2983  | 510.3   | 12.8833  | 2 R.RHVAYVF chr1@147    | 6.54E-12 | 1.94E-04 |
| 16Mar2011 | 4687  | 741.38  | -23.1647 | 2 K.FPENRHI chr2@147    | 1.47E-10 | 0.003692 |
| 16Mar2011 | 4802  | 741.38  | -23.1647 | 2 K.FPENRHI chr2@147    | 2.03E-10 | 0.005105 |
| 16Mar2011 | 12880 | 1080.9  | -7.23447 | 3 K.EIVSTDLE Splice@chr | 3.58E-10 | 0.009839 |
| 16Mar2011 | 1710  | 446.77  | 19.99118 | 2 R.PVFSITTK chrX@158   | 1.85E-10 | 0.004967 |
| 16Mar2011 | 5442  | 748.39  | -27.6021 | 2 K.QKSNWH chr5@122     | 3.35E-12 | 0        |
| 16Mar2011 | 15119 | 665.37  | -26.6417 | 2 Q.INNK+14 Splice@chr  | 2.32E-10 | 0.006089 |
| 16Mar2011 | 781   | 748.36  | 16.41564 | 1 R.ATAGDGI chr3@584    | 1.56E-12 | 0        |
| 16Mar2011 | 5248  | 626.3   | -9.76097 | 2 R.LCESGAA Splice@chr  | 4.75E-14 | 0        |
| 16Mar2011 | 739   | 748.36  | 16.41564 | 1 R.ATAGDGI chr3@584    | 1.19E-10 | 0.003256 |
| 16Mar2011 | 5656  | 439.91  | 17.33685 | 3 K.NSQKNPI chr2@354    | 1.19E-10 | 0.003256 |
| 16Mar2011 | 12445 | 780.03  | -24.5321 | 3 ?.AQDNYM Splice@chr   | 1.37E-10 | 0.003403 |
| 16Mar2011 | 17355 | 913.49  | -5.18556 | 2 F.TEMPLGC chrX@986    | 3.85E-12 | 0        |
| 16Mar2011 | 3771  | 510.3   | 12.8833  | 2 R.RHVAYVF chr1@147    | 6.40E-11 | 0.001529 |
| 16Mar2011 | 3717  | 510.3   | 12.8833  | 2 R.RHVAYVF chr1@147    | 1.25E-10 | 0.003287 |
| 16Mar2011 | 13375 | 725.88  | -4.04164 | 2 I.NFLQLYDI Splice@chr | 9.89E-11 | 0.00236  |
| 16Mar2011 | 6025  | 741.38  | -23.1647 | 2 K.FPENRHI chr2@147    | 3.65E-10 | 0.008574 |
| 16Mar2011 | 18593 | 609.34  | 11.16754 | 4 A.EITEMLPi chr2@658   | 9.84E-11 | 0.00236  |
| 16Mar2011 | 20055 | 791.44  | -2.89613 | 2 R.ERRGHTK chr1@765    | 9.07E-11 | 0.00212  |
| 16Mar2011 | 20843 | 1047.06 | 2.482016 | 2 L.ESSQKIDL chr4@351   | 1.80E-10 | 0.003926 |
| 16Mar2011 | 15250 | 1153.22 | -26.2628 | 3 F.EGIRTGG Splice@chr  | 3.69E-11 | 4.00E-04 |
| 16Mar2011 | 5042  | 805.42  | -29.245  | 1 K.KMGGGN chr5@992     | 7.03E-11 | 0.001529 |
| 16Mar2011 | 5971  | 741.38  | -23.1647 | 2 K.FPENRHI chr2@147    | 2.51E-10 | 0.005559 |
| 16Mar2011 | 4520  | 536.29  | -10.9462 | 2 _QVEFNPI Splice@chr   | 1.95E-11 | 2.69E-04 |
| 16Mar2011 | 7956  | 533.82  | 16.26677 | 2 K.TNIYTILTI chr5@132  | 2.91E-10 | 0.006993 |
| 16Mar2011 | 13124 | 1042.55 | 20.23923 | 1 R.YLELDNFI Splice@chr | 5.29E-11 | 0.001177 |
| 16Mar2011 | 18381 | 895.78  | -1.06827 | 3 _RELTEEDI Splice@chr  | 1.49E-12 | 0        |
| 16Mar2011 | 6765  | 748.39  | -27.6021 | 2 K.QKSNWH chr5@122     | 1.53E-11 | 1.41E-04 |
| 16Mar2011 | 19502 | 634.84  | 6.410455 | 2 R.VDIGDILF Splice@chr | 4.08E-13 | 0        |
| 16Mar2011 | 18026 | 744.71  | -3.82989 | 3 R.MTRVFSI chr3@171    | 9.54E-11 | 0.002238 |
| 16Mar2011 | 152   | 743.48  | 2.794988 | 1 K.KIGGAGII chr1@288   | 2.60E-10 | 0.006005 |
| 16Mar2011 | 19986 | 791.44  | -2.89613 | 2 R.ERRGHTK chr1@765    | 3.05E-10 | 0.007432 |
| 16Mar2011 | 6079  | 741.38  | -23.1647 | 2 K.FPENRHI chr2@147    | 2.09E-10 | 0.004562 |
| 16Mar2011 | 11269 | 701.38  | -29.6051 | 2 F.DKNIWNI chr5@602    | 4.14E-10 | 0.009846 |
| 16Mar2011 | 15327 | 739.39  | -0.08266 | 2 R.VDETLILC gi 392890  | 1.81E-12 | 0        |

|           |       |         |          |                          |          |          |
|-----------|-------|---------|----------|--------------------------|----------|----------|
| 16Mar2011 | 7099  | 841.48  | -24.9081 | 2 _..KLNAK+1 chr1@1427   | 3.78E-10 | 0.009217 |
| 16Mar2011 | 17877 | 868.47  | -17.3524 | 2 L.FLWSK+1 chr2@1462    | 2.17E-10 | 0.004562 |
| 16Mar2011 | 6326  | 936.48  | 27.86052 | 1 K.LNGGYEC chr2@1191    | 4.00E-11 | 4.00E-04 |
| 16Mar2011 | 4931  | 487.28  | -16.4424 | 2 K.LQTSNGL Splice@chr   | 1.08E-10 | 0.002468 |
| 16Mar2011 | 6361  | 489.28  | 28.87637 | 2 R.RGTASRS chr5@1951    | 4.83E-12 | 0        |
| 16Mar2011 | 1601  | 801.46  | -26.9469 | 1 K.WAGVVL chr4@3665     | 7.32E-11 | 0.001761 |
| 16Mar2011 | 10017 | 400.75  | 5.038673 | 2 K.VEAVAL Splice@chr    | 7.82E-11 | 0.001761 |
| 16Mar2011 | 306   | 471.76  | 0.194482 | 2 R.RSPAAPS chr1@1365    | 1.35E-10 | 0.003523 |
| 16Mar2011 | 12544 | 705.83  | -3.72364 | 2 M.PSMEEV chr5@4890     | 1.35E-13 | 0        |
| 16Mar2011 | 3662  | 510.3   | 12.8833  | 2 R.RHVAVVF chr1@1475    | 1.23E-10 | 0.003287 |
| 16Mar2011 | 6821  | 748.39  | -27.6021 | 2 K.QKSNWH chr5@1225     | 1.63E-10 | 0.003926 |
| 16Mar2011 | 15864 | 888.46  | 11.62323 | 2 K.DITLEVEA Splice@chr  | 2.74E-12 | 0        |
| 16Mar2011 | 16379 | 747.39  | 13.7081  | 2 K.MLRFNEC chr2@8355    | 1.79E-10 | 0.003926 |
| 16Mar2011 | 363   | 474.27  | -11.3587 | 2 K.EAVQLKN chr1@4867    | 3.92E-10 | 0.009316 |
| 16Mar2011 | 19444 | 805.47  | -13.7324 | 2 K.TPIFIPAP chr5@1861   | 6.12E-11 | 0.001529 |
| 16Mar2011 | 4942  | 412.56  | -22.1132 | 3 _..NPRGKKC Splice@chr  | 3.27E-10 | 0.008075 |
| 16Mar2011 | 11608 | 1075.05 | -16.1169 | 2 R.TCSK+14. chr2@1253   | 2.48E-10 | 0.005559 |
| 16Mar2011 | 20782 | 1147.25 | 13.44098 | 3 R.FQSAAIG Splice@chr   | 1.04E-12 | 0        |
| 16Mar2011 | 13537 | 556.85  | -28.4079 | 2 R.QNKIVLI Splice@chr   | 1.54E-10 | 0.00372  |
| 16Mar2011 | 15116 | 622.33  | 9.587405 | 2 R.AK+14.01 chr2@4270   | 7.54E-11 | 0.001761 |
| 16Mar2011 | 18756 | 895.78  | -1.06827 | 3 _..RELTEEDI Splice@chr | 7.85E-13 | 0        |
| 16Mar2011 | 8071  | 534.32  | 13.11853 | 2 K.TNIYTILTI chr5@1325  | 1.88E-10 | 0.004142 |
| 16Mar2011 | 15929 | 888.46  | 11.62323 | 2 K.DITLEVEA Splice@chr  | 3.25E-13 | 0        |
| 16Mar2011 | 13176 | 1042.55 | 20.23923 | 1 R.YLELDNFI Splice@chr  | 5.38E-11 | 0.001303 |
| 16Mar2011 | 19947 | 791.44  | -2.89613 | 2 R.ERRGHTK chr1@7655    | 2.86E-10 | 0.006657 |
| 16Mar2011 | 5192  | 575.29  | 19.23719 | 2 R.QPSSSAD chr5@2031    | 4.16E-10 | 0.009951 |
| 16Mar2011 | 15761 | 983.45  | -13.9781 | 2 R.SFSTIPDS chr2@1305   | 1.01E-10 | 0.002468 |
| 16Mar2011 | 15378 | 739.39  | -0.08266 | 2 R.VDETLILC gi 3928905  | 1.98E-12 | 0        |
| 16Mar2011 | 17027 | 991.51  | 24.02083 | 3 _..IYVPADD Splice@chr  | 3.32E-15 | 0        |
| 16Mar2011 | 17305 | 913.49  | -5.18556 | 2 F.TEMPLGC chrX@9861    | 2.82E-11 | 2.69E-04 |
| 16Mar2011 | 17263 | 824.43  | -7.63469 | 2 K.YFVNFSN chr2@2113    | 8.51E-11 | 0.001881 |
| 16Mar2011 | 7488  | 693.87  | -6.6949  | 2 V.ICVAVGD chr5@1063    | 1.04E-10 | 0.002468 |
| 16Mar2011 | 18402 | 1003.18 | 7.145987 | 3 R.CWNRRA Splice@chr    | 2.58E-10 | 0.005779 |
| 16Mar2011 | 11080 | 512.28  | -21.6995 | 3 K.KVQNHSL chr5@4515    | 1.14E-10 | 0.002706 |
| 16Mar2011 | 17544 | 732.07  | 19.51873 | 3 R.ATDDWII Splice@chr   | 2.07E-10 | 0.004465 |
| 16Mar2011 | 19467 | 634.84  | 6.410455 | 2 R.VDIGDILF Splice@chr  | 4.22E-13 | 0        |
| 16Mar2011 | 15171 | 622.33  | 9.587405 | 2 R.AK+14.01 chr2@4270   | 3.78E-10 | 0.009217 |
| 16Mar2011 | 7108  | 430.72  | -18.0384 | 2 R.VVDSIDG chr5@6422    | 3.49E-10 | 0.007629 |
| 16Mar2011 | 17969 | 731.89  | -5.88992 | 2 R.VDETLILC chr2@8606   | 1.30E-12 | 0        |
| 16Mar2011 | 18543 | 1003.18 | 7.145987 | 3 R.CWNRRA Splice@chr    | 4.03E-12 | 1.42E-04 |
| 16Mar2011 | 15876 | 983.45  | -13.9781 | 2 R.SFSTIPDS chr2@1305   | 5.04E-13 | 0        |
| 16Mar2011 | 6388  | 936.48  | 27.86052 | 1 K.LNGGYEC chr2@1191    | 2.56E-11 | 5.20E-04 |
| 16Mar2011 | 18655 | 622.08  | 13.36542 | 4 R.RFCAPKT chrX@1320    | 1.68E-10 | 0.004174 |
| 16Mar2011 | 11571 | 1075.05 | -16.1169 | 2 R.TCSK+14. chr2@1253   | 1.27E-10 | 0.003462 |
| 16Mar2011 | 1820  | 665.38  | -3.2154  | 2 R.QLQM+1 chr5@7160     | 4.24E-10 | 0.009412 |
| 16Mar2011 | 3997  | 510.3   | 12.8833  | 2 R.RHVAVVF chr1@1475    | 6.54E-12 | 1.42E-04 |
| 16Mar2011 | 7694  | 434.24  | 13.9946  | 3 _..RSNDQTI chr5@6378   | 1.22E-10 | 0.003134 |

|           |       |         |          |                          |          |          |
|-----------|-------|---------|----------|--------------------------|----------|----------|
| 16Mar2011 | 1252  | 502.26  | 17.41275 | 2 R.EENEELLI chr5@142    | 2.70E-10 | 0.006354 |
| 16Mar2011 | 3888  | 510.3   | 12.8833  | 2 R.RHVAYVF chr1@147     | 7.70E-11 | 0.0019   |
| 16Mar2011 | 13484 | 725.88  | -4.04164 | 2 I.NFLQLYDI Splice@chr  | 1.57E-10 | 0.003969 |
| 16Mar2011 | 6147  | 741.38  | -23.1647 | 2 K.FPENRHI, chr2@147    | 3.83E-10 | 0.008437 |
| 16Mar2011 | 6766  | 841.48  | -24.9081 | 2 _ .KLNAK+1 chr1@142    | 2.95E-10 | 0.00664  |
| 16Mar2011 | 15414 | 739.39  | -0.08266 | 2 R.VDETLILC gi 392890   | 4.94E-13 | 0        |
| 16Mar2011 | 11570 | 717.04  | 7.989016 | 3 K.YKINTDEI chr2@556    | 1.75E-10 | 0.004269 |
| 16Mar2011 | 17667 | 732.07  | 19.51873 | 3 R.ATDDWII Splice@chr   | 4.98E-10 | 0.009851 |
| 16Mar2011 | 18884 | 593.34  | 22.02044 | 2 R.NSHTLPL chrX@907     | 2.16E-10 | 0.005001 |
| 16Mar2011 | 15472 | 739.39  | -0.08266 | 2 R.VDETLILC gi 392890   | 3.74E-12 | 1.42E-04 |
| 16Mar2011 | 20081 | 791.44  | -2.89613 | 2 R.ERRGHTk chr1@765     | 3.51E-10 | 0.007629 |
| 16Mar2011 | 7150  | 841.48  | -24.9081 | 2 _ .KLNAK+1 chr1@142    | 4.64E-10 | 0.009785 |
| 16Mar2011 | 20225 | 791.44  | -2.89613 | 2 R.ERRGHTk chr1@765     | 2.44E-10 | 0.005502 |
| 16Mar2011 | 6366  | 439.9   | -5.46992 | 3 K.NSQKNPI chr2@354     | 1.51E-11 | 2.64E-04 |
| 16Mar2011 | 5319  | 575.29  | 19.23719 | 2 R.QPSSSAD chr5@203     | 3.32E-10 | 0.007439 |
| 16Mar2011 | 15335 | 629     | 0.453558 | 3 L.VFHSFFIL chrX@126    | 4.94E-10 | 0.009851 |
| 16Mar2011 | 3831  | 510.3   | 12.8833  | 2 R.RHVAYVF chr1@147     | 1.28E-10 | 0.003462 |
| 16Mar2011 | 17408 | 912.99  | -3.34628 | 2 F.TEMPLGC chrX@986     | 8.94E-11 | 0.0019   |
| 16Mar2011 | 6437  | 936.48  | 27.86052 | 1 K.LNGGYEC chr2@119     | 7.97E-11 | 0.0019   |
| 16Mar2011 | 16337 | 751.38  | -7.12052 | 2 _ .CLDMFSF chr4@395    | 2.41E-10 | 0.005407 |
| 16Mar2011 | 8110  | 534.32  | 13.11853 | 2 K.TNIYTILTI chr5@132   | 3.23E-10 | 0.00734  |
| 16Mar2011 | 20941 | 1147.24 | 4.705638 | 3 R.FQSAAG Splice@chr    | 2.33E-11 | 3.91E-04 |
| 16Mar2011 | 11137 | 897.42  | -27.6753 | 3 _ .QVREMH Splice@chr   | 2.61E-10 | 0.0056   |
| 16Mar2011 | 16485 | 747.39  | 13.7081  | 2 K.MLRFNEC chr2@835     | 9.45E-11 | 0.002242 |
| 16Mar2011 | 17614 | 732.07  | 19.51873 | 3 R.ATDDWII Splice@chr   | 2.76E-10 | 0.006456 |
| 16Mar2011 | 14662 | 858.48  | 6.006088 | 3 _ .LETGIKPI Splice@chr | 2.49E-13 | 0        |
| 16Mar2011 | 7330  | 841.98  | -26.9038 | 2 _ .KLNAK+1 chr1@142    | 4.25E-10 | 0.009412 |
| 16Mar2011 | 19654 | 805.97  | -15.8175 | 2 K.TPIFIPAP, chr5@186   | 3.47E-10 | 0.007629 |
| 16Mar2011 | 7995  | 533.82  | 16.26677 | 2 K.TNIYTILTI chr5@132   | 1.63E-10 | 0.004174 |
| 16Mar2011 | 15726 | 1005.47 | -16.3827 | 2 K.KVELALW Splice@chr   | 5.03E-22 | 0        |
| 16Mar2011 | 15464 | 563.86  | -24.1467 | 2 R.QNK+14. Splice@chr   | 3.61E-10 | 0.007728 |
| 16Mar2011 | 17141 | 991.51  | 24.02083 | 3 _ .IYVPADD Splice@chr  | 2.38E-11 | 3.91E-04 |
| 16Mar2011 | 17146 | 677.61  | 5.437891 | 4 K.ESIVSVLT chrX@969    | 5.03E-11 | 0.001486 |
| 16Mar2011 | 13245 | 1042.55 | 20.23923 | 1 R.YLELDNFI Splice@chr  | 1.63E-10 | 0.004174 |
| 16Mar2011 | 6842  | 748.39  | -27.6021 | 2 K.QKSNEW chr5@122      | 2.27E-11 | 3.91E-04 |
| 16Mar2011 | 11521 | 1075.05 | -16.1169 | 2 R.TCSK+14. chr2@125    | 2.64E-10 | 0.005926 |
| 16Mar2011 | 592   | 419.23  | -7.22396 | 2 R.RSPELVH chr5@417     | 3.44E-10 | 0.007629 |
| 16Mar2011 | 11069 | 663.85  | -5.06443 | 2 N.KMIFSMI chr4@862     | 4.14E-10 | 0.009112 |
| 16Mar2011 | 7056  | 430.72  | -18.0384 | 2 R.VVDSIDG chr5@642     | 3.86E-10 | 0.00853  |
| 16Mar2011 | 11025 | 512.28  | -21.6995 | 3 K.KVQNHSl chr5@451     | 1.50E-10 | 0.003969 |
| 16Mar2011 | 20123 | 791.44  | -2.89613 | 2 R.ERRGHTk chr1@765     | 9.19E-11 | 0.002135 |
| 16Mar2011 | 7810  | 434.24  | 13.9946  | 3 _ .RSNDQTI chr5@637    | 6.83E-11 | 0.001821 |
| 16Mar2011 | 5977  | 741.38  | -23.1647 | 2 K.FPENRHI, chr2@147    | 2.47E-10 | 0.005502 |
| 16Mar2011 | 18930 | 1007.86 | 15.19559 | 3 R.CWNRRA Splice@chr    | 1.14E-10 | 0.002909 |
| 16Mar2011 | 16126 | 1118.92 | 11.45146 | 3 R.NWKPKT Splice@chr    | 6.76E-11 | 0.001821 |
| 16Mar2011 | 20929 | 1147.24 | 4.705638 | 3 R.FQSAAG Splice@chr    | 1.72E-12 | 0        |
| 16Mar2011 | 6089  | 741.38  | -23.1647 | 2 K.FPENRHI, chr2@147    | 4.62E-10 | 0.009785 |

|           |       |         |          |                          |          |          |
|-----------|-------|---------|----------|--------------------------|----------|----------|
| 16Mar2011 | 3943  | 510.3   | 12.8833  | 2 R.RHVAYVF chr1@1479    | 6.54E-12 | 1.42E-04 |
| 16Mar2011 | 13949 | 711.96  | -15.7141 | 5 R.YQCQTFF chrX@1494    | 3.76E-10 | 0.008025 |
| 16Mar2011 | 19437 | 965.53  | -19.1507 | 2 F.FLRQIRQI chr4@3226   | 2.82E-10 | 0.006539 |
| 16Mar2011 | 6895  | 748.39  | -27.6021 | 2 K.QKSNWH chr5@1229     | 8.98E-11 | 0.0019   |
| 16Mar2011 | 19630 | 634.83  | -9.39461 | 2 R.VDIGDILF Splice@chr  | 3.45E-12 | 0        |
| 16Mar2011 | 11126 | 663.85  | -5.06443 | 2 N.KMIFSMI chr4@8622    | 2.28E-10 | 0.005407 |
| 16Mar2011 | 18446 | 895.77  | -12.2594 | 3 _..RELTEEDI Splice@chr | 3.39E-12 | 0        |
| 16Mar2011 | 2475  | 446.77  | 19.99118 | 2 R.PVFSITTK chrX@1588   | 3.29E-10 | 0.007439 |
| 16Mar2011 | 15246 | 622.33  | 9.587405 | 2 R.AK+14.01 chr2@4270   | 2.26E-10 | 0.005319 |
| 16Mar2011 | 4069  | 517.33  | 6.214252 | 2 R.KMLRMII chr1@1158    | 1.31E-10 | 0.003568 |
| 16Mar2011 | 19589 | 634.83  | -9.39461 | 2 R.VDIGDILF Splice@chr  | 2.83E-12 | 0        |
| 16Mar2011 | 7204  | 841.48  | -24.9081 | 2 _..KLNAK+1 chr1@1427   | 1.31E-10 | 0.003568 |
| 16Mar2011 | 18367 | 987.51  | 4.289691 | 3 K.KYLFLDNI chr4@1288   | 4.43E-10 | 0.009785 |
| 16Mar2011 | 2980  | 915.47  | 1.201399 | 1 K.FHEIGGQ chrX@4727    | 1.36E-10 | 0.003786 |
| 16Mar2011 | 13840 | 725.88  | -4.04164 | 2 I.NFLQLYDI Splice@chr  | 4.52E-10 | 0.005863 |
| 16Mar2011 | 19607 | 622.08  | 13.36542 | 4 R.RFCAPKT chrX@1320    | 1.54E-10 | 0.003153 |
| 16Mar2011 | 19030 | 665.37  | -26.6417 | 2 Q.INNK+14 Splice@chr   | 1.78E-10 | 0.003248 |
| 16Mar2011 | 14002 | 556.85  | -28.4079 | 2 R.QNKIVLI Splice@chr   | 3.04E-10 | 0.004251 |
| 16Mar2011 | 16098 | 563.86  | -24.1467 | 2 R.QNK+14. Splice@chr   | 6.59E-10 | 0.007308 |
| 16Mar2011 | 3726  | 414.74  | -1.18019 | 2 R.FAAAHLA chrX@1289    | 2.16E-10 | 0.003534 |
| 16Mar2011 | 10685 | 1137.64 | -23.9488 | 1 Q.FLVISFA\ chrX@1232   | 4.17E-10 | 0.005256 |
| 16Mar2011 | 20699 | 622.08  | 13.36542 | 4 R.RFCAPKT chrX@1320    | 7.75E-10 | 0.007979 |
| 16Mar2011 | 6613  | 936.48  | 27.86052 | 1 K.LNGGYEC Splice@chr   | 8.28E-11 | 0.001958 |
| 16Mar2011 | 13041 | 682.32  | -26.3372 | 2 P.LSSWNVF Splice@chr   | 5.83E-10 | 0.006822 |
| 16Mar2011 | 19457 | 622.33  | 12.015   | 4 R.RFCAPKT chrX@1320    | 1.55E-10 | 0.003153 |
| 16Mar2011 | 13901 | 725.88  | -4.04164 | 2 I.NFLQLYDI Splice@chr  | 8.19E-11 | 0.001841 |
| 16Mar2011 | 19317 | 622.08  | 13.36542 | 4 R.RFCAPKT chrX@1320    | 7.26E-10 | 0.007786 |
| 16Mar2011 | 19557 | 622.08  | 13.36542 | 4 R.RFCAPKT chrX@1320    | 6.15E-10 | 0.006822 |
| 16Mar2011 | 19214 | 622.08  | 13.36542 | 4 R.RFCAPKT chrX@1320    | 1.93E-10 | 0.00333  |
| 16Mar2011 | 13951 | 725.88  | -4.04164 | 2 I.NFLQLYDI Splice@chr  | 4.92E-11 | 8.91E-04 |
| 16Mar2011 | 669   | 437.75  | -8.73436 | 2 K.LQKVGDS chrX@8106    | 1.12E-10 | 0.002633 |
| 16Mar2011 | 3377  | 593.86  | -29.0028 | 2 K.K+14.016 Splice@chr  | 9.08E-10 | 0.009016 |
| 16Mar2011 | 20650 | 634.83  | -9.39461 | 2 R.VDIGDILF Splice@chr  | 1.72E-11 | 2.73E-04 |
| 16Mar2011 | 19363 | 622.08  | 13.36542 | 4 R.RFCAPKT chrX@1320    | 3.31E-10 | 0.004772 |
| 16Mar2011 | 19239 | 895.77  | -12.2594 | 3 _..RELTEEDI Splice@chr | 9.08E-13 | 0        |
| 16Mar2011 | 21455 | 1123.58 | -28.6916 | 2 _..IPHFDIIP Splice@chr | 2.53E-10 | 0.003728 |
| 16Mar2011 | 21717 | 959.53  | 7.678192 | 2 Y.NNCKLNS chrX@1250    | 1.22E-10 | 0.002969 |
| 16Mar2011 | 20600 | 634.83  | -9.39461 | 2 R.VDIGDILF Splice@chr  | 1.98E-13 | 0        |
| 16Mar2011 | 19820 | 694.87  | 2.550973 | 2 K.YHNITLQ chrX@3836    | 3.94E-10 | 0.005157 |
| 16Mar2011 | 20113 | 1129.09 | -16.86   | 2 S.PPK+14.0 chrX@7427   | 1.09E-09 | 0.009832 |
| 16Mar2011 | 19736 | 895.78  | -1.06827 | 3 _..RELTEEDI Splice@chr | 1.61E-11 | 2.73E-04 |
| 16Mar2011 | 6509  | 407.74  | 5.852463 | 2 R.ASDIAPIK chrX@1799   | 1.60E-10 | 0.003153 |
| 16Mar2011 | 19660 | 622.08  | 13.36542 | 4 R.RFCAPKT chrX@1320    | 8.40E-10 | 0.00854  |
| 16Mar2011 | 878   | 465.78  | 28.16952 | 2 K.DGKVLVC chrX@3954    | 8.31E-10 | 0.00854  |
| 16Mar2011 | 16150 | 563.86  | -24.1467 | 2 R.QNK+14. Splice@chr   | 2.30E-10 | 0.003625 |
| 16Mar2011 | 16845 | 575.97  | 16.41892 | 3 K.TSASGEE Splice@chr   | 4.37E-10 | 0.005559 |
| 16Mar2011 | 18308 | 732.07  | 19.51873 | 3 R.ATDDWII Splice@chr   | 1.82E-10 | 0.003248 |

|           |       |         |          |                         |          |          |
|-----------|-------|---------|----------|-------------------------|----------|----------|
| 16Mar2011 | 20612 | 622.08  | 13.36542 | 4 R.RFCAPKT chrX@1320   | 3.34E-10 | 0.004772 |
| 16Mar2011 | 19091 | 665.37  | -26.6417 | 2 Q.INNK+14 Splice@chr  | 2.41E-10 | 0.003625 |
| 16Mar2011 | 20556 | 634.84  | 6.410455 | 2 R.VDIGDILF Splice@chr | 6.72E-13 | 0        |
| 16Mar2011 | 19771 | 694.87  | 2.550973 | 2 K.YHNITLQ chrX@3836   | 5.37E-10 | 0.006338 |
| 16Mar2011 | 10955 | 440.24  | -24.8035 | 2 K.KNLDVYK Splice@chr  | 5.02E-10 | 0.006265 |
| 16Mar2011 | 20562 | 622.08  | 13.36542 | 4 R.RFCAPKT chrX@1320   | 6.79E-11 | 0.001493 |
| 16Mar2011 | 8206  | 533.82  | 16.26677 | 2 K.TNIYTILTI chr5@1329 | 1.79E-10 | 0.005372 |
| 16Mar2011 | 16317 | 888.46  | 11.62323 | 2 K.DITLEVEA Splice@chr | 1.81E-10 | 0.005372 |
| 16Mar2011 | 7397  | 841.48  | -24.9081 | 2 _.KLNAK+1 chr1@1427   | 4.07E-10 | 0.009731 |
| 16Mar2011 | 23327 | 953.26  | 20.59712 | 4 _.SDNDLFE Splice@chr  | 3.67E-10 | 0.008739 |
| 16Mar2011 | 757   | 437.75  | -8.73436 | 2 K.LQKVGD5 chrX@8106   | 2.52E-10 | 0.007106 |
| 16Mar2011 | 6201  | 741.38  | -23.1647 | 2 K.FPENRHI chr2@1477   | 2.27E-10 | 0.006496 |
| 16Mar2011 | 22133 | 828.38  | -20.1128 | 2 K.PNLK+14 chr2@3862   | 2.12E-10 | 0.005967 |
| 16Mar2011 | 16898 | 747.39  | 13.7081  | 2 K.MLRFNEC chr2@8355   | 2.21E-10 | 0.006284 |
| 16Mar2011 | 14942 | 1030.51 | 3.115089 | 2 L.SPIPEVPC Splice@chr | 2.62E-14 | 0        |
| 16Mar2011 | 7052  | 748.39  | -27.6021 | 2 K.QKSNWH chr5@1229    | 6.96E-12 | 6.89E-04 |
| 16Mar2011 | 6362  | 741.38  | -23.1647 | 2 K.FPENRHI chr2@1477   | 1.73E-10 | 0.005279 |
| 16Mar2011 | 2038  | 672.36  | 14.91008 | 2 R.M+15.99 Splice@chr  | 1.68E-10 | 0.004958 |
| 16Mar2011 | 6254  | 741.38  | -23.1647 | 2 K.FPENRHI chr2@1477   | 3.19E-10 | 0.007936 |
| 16Mar2011 | 7338  | 841.48  | -24.9081 | 2 _.KLNAK+1 chr1@1427   | 1.82E-10 | 0.005372 |
| 16Mar2011 | 21103 | 1096.89 | 6.757706 | 3 K.DKPFPSI Splice@chr  | 3.76E-12 | 4.50E-04 |
| 16Mar2011 | 17790 | 879.14  | -17.6078 | 3 R.GMDKVR chr5@1677    | 1.79E-10 | 0.005372 |
| 16Mar2011 | 21063 | 1097.22 | 2.692596 | 3 K.DKPFPSI Splice@chr  | 3.75E-15 | 0        |
| 16Mar2011 | 20303 | 805.47  | -13.7324 | 2 K.TPIFIPAP chr5@1861  | 3.35E-10 | 0.007936 |
| 16Mar2011 | 19253 | 622.08  | 13.36542 | 4 R.RFCAPKT chrX@1320   | 1.28E-10 | 0.004236 |
| 16Mar2011 | 6308  | 741.38  | -23.1647 | 2 K.FPENRHI chr2@1477   | 2.09E-10 | 0.005863 |
| 16Mar2011 | 6918  | 626.8   | -12.4435 | 2 R.LCESGAA Splice@chr  | 7.54E-15 | 0        |
| 16Mar2011 | 7351  | 430.72  | -18.0384 | 2 R.VVDSIDG chr5@6422   | 3.43E-10 | 0.008244 |
| 16Mar2011 | 16158 | 1056.56 | 28.0642  | 3 I.SRVEDDS Splice@chr  | 5.80E-15 | 0        |
| 16Mar2011 | 18956 | 987.51  | 4.289691 | 3 K.KYLFLDNI chr4@1288  | 9.03E-11 | 0.002717 |
| 16Mar2011 | 6638  | 936.48  | 27.86052 | 1 K.LNGGYEC chr2@1191   | 2.97E-11 | 7.66E-04 |
| 16Mar2011 | 19479 | 895.78  | -1.06827 | 3 _.RELTEEDI Splice@chr | 2.68E-11 | 7.66E-04 |
| 16Mar2011 | 20744 | 791.44  | -2.89613 | 2 R.ERRGHTK chr1@7659   | 1.21E-10 | 0.003823 |
| 16Mar2011 | 18382 | 868.47  | -17.3524 | 2 L.FLWSK+1 chr2@1462   | 1.63E-10 | 0.004852 |
| 16Mar2011 | 6859  | 626.3   | -9.76097 | 2 R.LCESGAA Splice@chr  | 4.43E-16 | 0        |
| 16Mar2011 | 7999  | 434.24  | 13.9946  | 3 _.RSNDQTI chr5@6378   | 2.19E-10 | 0.006284 |
| 16Mar2011 | 4191  | 510.3   | 12.8833  | 2 R.RHVAYVF chr1@1479   | 6.40E-11 | 0.001803 |
| 16Mar2011 | 19036 | 895.78  | -1.06827 | 3 _.RELTEEDI Splice@chr | 2.89E-11 | 7.66E-04 |
| 16Mar2011 | 14907 | 855.41  | -22.1447 | 2 _.HVQEVAI Splice@chr  | 8.75E-11 | 0.002489 |
| 16Mar2011 | 7282  | 841.48  | -24.9081 | 2 _.KLNAK+1 chr1@1427   | 1.27E-10 | 0.004029 |
| 16Mar2011 | 14599 | 887.93  | 29.43791 | 2 I.DEREESTA Splice@chr | 1.98E-10 | 0.005565 |
| 16Mar2011 | 5527  | 571.66  | 26.16946 | 3 K.KNSIFQP chr1@2570   | 4.12E-11 | 0.001238 |
| 16Mar2011 | 19551 | 1007.86 | 15.19559 | 3 R.CWNRRA Splice@chr   | 2.49E-11 | 7.66E-04 |
| 16Mar2011 | 3615  | 479.06  | -2.45135 | 5 K.M+15.99 chr5@1646   | 3.91E-10 | 0.009438 |
| 16Mar2011 | 11822 | 1075.05 | -16.1169 | 2 R.TCSK+14 chr2@1253   | 2.85E-10 | 0.007561 |
| 16Mar2011 | 20889 | 791.44  | -2.89613 | 2 R.ERRGHTK chr1@7659   | 2.07E-10 | 0.005863 |
| 16Mar2011 | 4137  | 510.3   | 12.8833  | 2 R.RHVAYVF chr1@1479   | 6.54E-12 | 6.89E-04 |

|           |       |         |          |                         |          |          |
|-----------|-------|---------|----------|-------------------------|----------|----------|
| 16Mar2011 | 19499 | 1007.86 | 15.19559 | 3 R.CWNRRA Splice@chr   | 3.02E-11 | 7.66E-04 |
| 16Mar2011 | 17325 | 669.35  | -28.2834 | 2 K.LEFNISK chr1@1931   | 1.50E-11 | 7.66E-04 |
| 16Mar2011 | 6939  | 841.48  | -24.9081 | 2 _KLNK+1 chr1@1427     | 1.40E-10 | 0.004339 |
| 16Mar2011 | 8374  | 534.32  | 13.11853 | 2 K.TNIYTILTI chr5@1329 | 3.61E-10 | 0.008739 |
| 16Mar2011 | 17425 | 991.51  | 24.02083 | 3 _IYVPADD Splice@chr   | 7.12E-14 | 0        |
| 16Mar2011 | 4080  | 510.3   | 12.8833  | 2 R.RHVAYVF chr1@1479   | 6.40E-11 | 0.001803 |
| 16Mar2011 | 7099  | 748.39  | -27.6021 | 2 K.QKSNWH chr5@1229    | 3.09E-11 | 7.66E-04 |
| 16Mar2011 | 7100  | 553.33  | -3.70337 | 2 K.PQAKPNI chr5@9002   | 1.11E-10 | 0.003494 |
| 16Mar2011 | 13912 | 556.85  | 26.98454 | 2 R.NKEPNLI chr2@8282   | 3.27E-10 | 0.007936 |
| 16Mar2011 | 5989  | 489.28  | 28.87637 | 2 R.RGTASRS chr5@1951   | 4.62E-11 | 0.001415 |
| 16Mar2011 | 20126 | 1147.24 | 4.705638 | 3 R.FQSAAIG Splice@chr  | 2.04E-12 | 0        |
| 16Mar2011 | 8839  | 438.91  | -18.0263 | 3 _KNDKKT chr2@4168     | 3.26E-10 | 0.008832 |
| 16Mar2011 | 12868 | 744.37  | -12.398  | 2 R.WGDHGF Splice@chr   | 1.51E-10 | 0.004961 |
| 16Mar2011 | 6194  | 841.48  | -24.9081 | 2 _KLNK+1 chr1@1427     | 1.43E-10 | 0.00472  |
| 16Mar2011 | 6353  | 748.39  | -27.6021 | 2 K.QKSNWH chr5@1229    | 2.45E-11 | 7.39E-04 |
| 16Mar2011 | 3348  | 510.3   | 12.8833  | 2 R.RHVAYVF chr1@1479   | 1.31E-10 | 0.004359 |
| 16Mar2011 | 20082 | 1147.24 | 4.705638 | 3 R.FQSAAIG Splice@chr  | 2.70E-15 | 0        |
| 16Mar2011 | 20088 | 860.68  | 2.433027 | 4 R.FQSAAIG Splice@chr  | 3.55E-13 | 0        |
| 16Mar2011 | 18743 | 567.28  | -29.3684 | 3 T.RSSIIADS chr1@1057  | 3.38E-10 | 0.009436 |
| 16Mar2011 | 6405  | 748.39  | -27.6021 | 2 K.QKSNWH chr5@1229    | 6.54E-11 | 0.001814 |
| 16Mar2011 | 19559 | 1096.88 | -2.30208 | 3 K.DKPFPSI Splice@chr  | 7.80E-12 | 3.21E-04 |
| 16Mar2011 | 19527 | 1096.88 | -2.30208 | 3 K.DKPFPSI Splice@chr  | 2.38E-12 | 0        |
| 16Mar2011 | 17524 | 665.37  | -26.6417 | 2 Q.INNK+14 Splice@chr  | 1.48E-10 | 0.004835 |
| 16Mar2011 | 16382 | 669.35  | -28.2834 | 2 K.LEFNISK chr1@1931   | 2.68E-11 | 7.39E-04 |
| 16Mar2011 | 15447 | 888.46  | 11.62323 | 2 K.DITLEVEA Splice@chr | 1.72E-11 | 4.63E-04 |
| 16Mar2011 | 3301  | 510.3   | 12.8833  | 2 R.RHVAYVF chr1@1479   | 1.23E-10 | 0.004233 |
| 16Mar2011 | 5712  | 741.38  | -23.1647 | 2 K.FPENRHL chr2@1477   | 2.03E-10 | 0.006265 |
| 16Mar2011 | 18893 | 634.83  | -9.39461 | 2 R.VDIGDILF Splice@chr | 1.13E-12 | 0        |
| 16Mar2011 | 20363 | 980.16  | -0.83113 | 3 K.EHVGILT chr1@8943   | 5.28E-11 | 0.001415 |
| 16Mar2011 | 5777  | 407.74  | 5.852463 | 2 R.ASDIAPIK chrX@1799  | 9.02E-11 | 0.002972 |
| 16Mar2011 | 7592  | 533.82  | 16.26677 | 2 K.TNIYTILTI chr5@1329 | 3.27E-10 | 0.008953 |
| 16Mar2011 | 15952 | 747.39  | 13.7081  | 2 K.MLRFNEC chr2@8359   | 1.28E-10 | 0.004233 |
| 16Mar2011 | 18199 | 895.78  | -1.06827 | 3 _RELTEEDI Splice@chr  | 7.38E-12 | 1.66E-04 |
| 16Mar2011 | 12949 | 725.88  | -4.04164 | 2 I.NFLQLYDI Splice@chr | 7.86E-11 | 0.002467 |
| 16Mar2011 | 282   | 523.27  | -14.3277 | 2 _QADVDV Splice@chr    | 7.71E-13 | 0        |
| 16Mar2011 | 19205 | 1118.91 | -28.9725 | 3 K.CK+14.01 Splice@chr | 3.15E-10 | 0.008592 |
| 16Mar2011 | 2111  | 461.91  | 0.487466 | 3 _ANYMKV chr3@1317     | 3.42E-10 | 0.009681 |
| 16Mar2011 | 14729 | 622.33  | 9.587405 | 2 R.AK+14.01 chr2@4270  | 1.09E-10 | 0.003884 |
| 16Mar2011 | 15393 | 888.46  | 11.62323 | 2 K.DITLEVEA Splice@chr | 1.14E-10 | 0.004127 |
| 16Mar2011 | 18852 | 634.83  | -9.39461 | 2 R.VDIGDILF Splice@chr | 4.99E-12 | 0        |
| 16Mar2011 | 14944 | 739.39  | -0.08266 | 2 R.VDETLILC gi 3928909 | 2.76E-11 | 7.39E-04 |
| 16Mar2011 | 17967 | 812.11  | 2.033465 | 3 A.EITEMLP Splice@chr  | 7.48E-13 | 0        |
| 16Mar2011 | 17795 | 895.77  | -12.2594 | 3 _RELTEEDI Splice@chr  | 1.15E-11 | 4.63E-04 |
| 16Mar2011 | 14062 | 1030.51 | 3.115089 | 2 L.SPIEVPC Splice@chr  | 8.97E-19 | 0        |
| 16Mar2011 | 4670  | 412.56  | -22.1132 | 3 _NPRGKKC Splice@chr   | 1.62E-10 | 0.00507  |
| 16Mar2011 | 17961 | 622.08  | 13.36542 | 4 R.RFCAPKT chrX@1320   | 1.22E-10 | 0.004233 |
| 16Mar2011 | 12840 | 725.88  | -4.04164 | 2 I.NFLQLYDI Splice@chr | 1.77E-11 | 4.63E-04 |

|           |       |         |          |                         |          |          |
|-----------|-------|---------|----------|-------------------------|----------|----------|
| 16Mar2011 | 9845  | 1137.64 | -23.9488 | 1 Q.FLVISFA\ chrX@123   | 9.48E-11 | 0.002972 |
| 16Mar2011 | 12894 | 725.88  | -4.04164 | 2 I.NFLQLYDI Splice@chr | 5.20E-11 | 0.001415 |
| 16Mar2011 | 19292 | 791.44  | -2.89613 | 2 R.ERRGHTK chr1@765    | 1.59E-10 | 0.00507  |
| 16Mar2011 | 4756  | 805.42  | -29.245  | 1 K.KMGGGN chr5@992     | 5.29E-11 | 0.001415 |
| 16Mar2011 | 6673  | 841.48  | -24.9081 | 2 _._KLNAK+1 chr1@142   | 1.13E-10 | 0.004127 |
| 16Mar2011 | 16820 | 913.5   | 5.790241 | 2 F.TEMPLGC chrX@986    | 2.85E-11 | 7.39E-04 |
| 16Mar2011 | 19391 | 791.44  | -2.89613 | 2 R.ERRGHTK chr1@765    | 2.28E-10 | 0.006605 |
| 16Mar2011 | 20099 | 1147.24 | 4.705638 | 3 R.FQSAAG Splice@chr   | 1.32E-15 | 0        |
| 16Mar2011 | 6620  | 841.48  | -24.9081 | 2 _._KLNAK+1 chr1@142   | 2.16E-10 | 0.006605 |
| 16Mar2011 | 18965 | 791.44  | -2.89613 | 2 R.ERRGHTK chr1@765    | 2.95E-10 | 0.008079 |
| 16Mar2011 | 6376  | 626.3   | -9.76097 | 2 R.LCESGAA Splice@chr  | 4.09E-16 | 0        |
| 16Mar2011 | 14598 | 622.33  | 9.587405 | 2 R.AK+14.0 chr2@427    | 1.02E-10 | 0.002651 |
| 16Mar2011 | 7790  | 534.32  | 13.11853 | 2 K.TNIYTILT chr5@132   | 1.94E-10 | 0.005316 |
| 16Mar2011 | 11649 | 661.4   | -2.4954  | 2 K.LVLIAVN chr1@652    | 2.42E-10 | 0.006257 |
| 16Mar2011 | 3838  | 510.3   | 12.8833  | 2 R.RHVAYVF chr1@147    | 6.54E-12 | 0        |
| 16Mar2011 | 3704  | 497.93  | -24.8103 | 3 K.NAYFSK+ chr2@134    | 3.04E-11 | 9.12E-04 |
| 16Mar2011 | 3994  | 510.3   | 12.8833  | 2 R.RHVAYVF chr1@147    | 1.30E-10 | 0.003288 |
| 16Mar2011 | 18565 | 805.46  | -26.0992 | 2 K.TPIFIPAP chr5@186   | 1.36E-11 | 1.63E-04 |
| 16Mar2011 | 3240  | 695.35  | -9.5814  | 2 R.SSAEK+1 chr3@329    | 3.22E-10 | 0.008549 |
| 16Mar2011 | 12496 | 833.41  | -5.13266 | 2 _._IDM+15 chrX@323    | 2.68E-10 | 0.007372 |
| 16Mar2011 | 10567 | 663.85  | -5.06443 | 2 N.KMIFSMI chr4@862    | 3.80E-10 | 0.009809 |
| 16Mar2011 | 13864 | 1030.51 | 3.115089 | 2 L.SPIEVPC Splice@chr  | 7.53E-17 | 0        |
| 16Mar2011 | 6886  | 841.48  | -24.9081 | 2 _._KLNAK+1 chr1@142   | 1.90E-10 | 0.005188 |
| 16Mar2011 | 20336 | 979.51  | -28.8585 | 3 R.SYVEATL chr5@147    | 2.41E-10 | 0.006257 |
| 16Mar2011 | 19770 | 1147.24 | 4.705638 | 3 R.FQSAAG Splice@chr   | 4.20E-12 | 0        |
| 16Mar2011 | 12701 | 725.88  | -4.04164 | 2 I.NFLQLYDI Splice@chr | 7.50E-11 | 0.001716 |
| 16Mar2011 | 6457  | 748.39  | -27.6021 | 2 K.QKSNWH chr5@122     | 1.42E-11 | 1.63E-04 |
| 16Mar2011 | 13804 | 1030.51 | 3.115089 | 2 L.SPIEVPC Splice@chr  | 2.19E-13 | 0        |
| 16Mar2011 | 14778 | 563.86  | -24.1467 | 2 R.QNK+14. Splice@chr  | 1.02E-10 | 0.002651 |
| 16Mar2011 | 2021  | 665.38  | -3.2154  | 2 R.QLQM+1 chr5@716     | 2.72E-10 | 0.007484 |
| 16Mar2011 | 5864  | 741.38  | -23.1647 | 2 K.FPENRHI chr2@147    | 2.25E-10 | 0.005894 |
| 16Mar2011 | 4049  | 510.3   | 12.8833  | 2 R.RHVAYVF chr1@147    | 3.18E-10 | 0.008302 |
| 16Mar2011 | 5745  | 741.38  | -23.1647 | 2 K.FPENRHI chr2@147    | 1.87E-10 | 0.005057 |
| 16Mar2011 | 3886  | 510.3   | 12.8833  | 2 R.RHVAYVF chr1@147    | 6.40E-11 | 0.001304 |
| 16Mar2011 | 11595 | 468.25  | 8.948133 | 2 K.IEDFLGNI chr1@149   | 2.53E-10 | 0.006368 |
| 16Mar2011 | 19072 | 791.44  | -2.89613 | 2 R.ERRGHTK chr1@765    | 2.60E-10 | 0.006746 |
| 16Mar2011 | 19787 | 1147.24 | 4.705638 | 3 R.FQSAAG Splice@chr   | 6.73E-13 | 0        |
| 16Mar2011 | 6505  | 748.39  | -27.6021 | 2 K.QKSNWH chr5@122     | 2.62E-11 | 9.12E-04 |
| 16Mar2011 | 15086 | 1056.87 | 4.800118 | 3 I.SRVEDDS Splice@chr  | 4.31E-15 | 0        |
| 16Mar2011 | 17099 | 744.71  | -3.82989 | 3 R.MTRVFSI chr3@171    | 2.40E-10 | 0.006257 |
| 16Mar2011 | 10132 | 509.8   | -23.773  | 2 R.SSVIMLIV chr2@576   | 1.74E-10 | 0.00442  |
| 16Mar2011 | 6324  | 626.3   | -9.76097 | 2 R.LCESGAA Splice@chr  | 9.16E-16 | 0        |
| 16Mar2011 | 5054  | 805.42  | -29.245  | 1 K.KMGGGN chr5@992     | 1.04E-11 | 0        |
| 16Mar2011 | 14392 | 516.3   | 4.106203 | 3 R.NIIFLMVI chrX@129   | 1.23E-10 | 0.003153 |
| 16Mar2011 | 10533 | 443.24  | -17.2689 | 2 K.PVVIDDA chrX@527    | 1.94E-10 | 0.005316 |
| 16Mar2011 | 3940  | 510.3   | 12.8833  | 2 R.RHVAYVF chr1@147    | 1.31E-11 | 0        |
| 16Mar2011 | 14450 | 930     | -10.0892 | 2 _._DTYYSNK chr2@698   | 3.62E-10 | 0.009243 |

|           |       |         |          |                         |          |          |
|-----------|-------|---------|----------|-------------------------|----------|----------|
| 16Mar2011 | 5715  | 440.24  | 7.186688 | 3 K.NSQKNPI chr2@3540   | 2.67E-10 | 0.007249 |
| 16Mar2011 | 4967  | 439.91  | 17.33685 | 3 K.NSQKNPI chr2@3540   | 3.51E-10 | 0.009003 |
| 16Mar2011 | 1339  | 502.26  | 17.41275 | 2 R.EENEELLI chr5@1425  | 4.76E-11 | 0.001182 |
| 16Mar2011 | 12753 | 725.88  | -4.04164 | 2 I.NFLQLYDI Splice@chr | 2.99E-11 | 9.12E-04 |
| 16Mar2011 | 18522 | 634.83  | -9.39461 | 2 R.VDIGDILF Splice@chr | 2.98E-13 | 0        |
| 16Mar2011 | 12813 | 725.88  | -4.04164 | 2 I.NFLQLYDI Splice@chr | 1.92E-10 | 0.005316 |
| 16Mar2011 | 12230 | 748.72  | -26.0118 | 3 R.LPSKENL chr4@5639   | 6.38E-11 | 0.001304 |
| 16Mar2011 | 14760 | 739.39  | -0.08266 | 2 R.VDETLILC gi 3928909 | 4.19E-12 | 0        |
| 16Mar2011 | 10008 | 921.47  | 18.50062 | 1 R.DLDDTSK chrX@7575   | 2.02E-10 | 0.005671 |
| 16Mar2011 | 17739 | 642.89  | -8.55783 | 2 R.KILIFKGF chr3@3108  | 2.85E-10 | 0.007591 |
| 16Mar2011 | 15318 | 576.3   | 8.670719 | 3 K.TSASGEE Splice@chr  | 6.92E-11 | 0.001716 |
| 16Mar2011 | 19288 | 1097.22 | 2.692596 | 3 K.DKPFPSI Splice@chr  | 1.30E-11 | 0        |
| 16Mar2011 | 14180 | 664.69  | -13.8924 | 3 _PTLNK+1 chr1@6526    | 7.45E-11 | 0.001716 |
| 16Mar2011 | 13313 | 944.95  | -29.5487 | 2 _ILCSTDVS Splice@chr  | 2.55E-10 | 0.006623 |
| 16Mar2011 | 14520 | 622.33  | 9.587405 | 2 R.AK+14.01 chr2@4270  | 2.15E-10 | 0.003704 |
| 16Mar2011 | 19710 | 1147.24 | 4.705638 | 3 R.FQSAAIG Splice@chr  | 2.66E-15 | 0        |
| 16Mar2011 | 16601 | 732.07  | 19.51873 | 3 R.ATDDWII Splice@chr  | 1.43E-10 | 0.0029   |
| 16Mar2011 | 5740  | 741.38  | -23.1647 | 2 K.FPENRHI chr2@1477   | 2.79E-10 | 0.005714 |
| 16Mar2011 | 6080  | 936.48  | 27.86052 | 1 K.LNGGYEC chr2@1191   | 3.24E-11 | 9.02E-04 |
| 16Mar2011 | 14075 | 858.48  | 6.006088 | 3 _LETGIKPI Splice@chr  | 4.42E-13 | 0        |
| 16Mar2011 | 552   | 515.33  | 11.70274 | 2 _KQKPKFP chr5@2015    | 2.37E-10 | 0.004452 |
| 16Mar2011 | 18467 | 634.84  | 6.410455 | 2 R.VDIGDILF Splice@chr | 2.06E-12 | 1.42E-04 |
| 16Mar2011 | 1448  | 801.46  | -26.9469 | 1 K.WAGVVL chr4@3669    | 5.51E-10 | 0.009872 |
| 16Mar2011 | 19014 | 1060.54 | -6.74128 | 3 K.SGTIFDNI Splice@chr | 2.43E-13 | 0        |
| 16Mar2011 | 18729 | 980.47  | -17.2661 | 3 K.SGTIFDNI Splice@chr | 2.28E-10 | 0.004133 |
| 16Mar2011 | 14111 | 664.7   | 1.197202 | 3 _PTLNK+1 chr1@6526    | 8.51E-11 | 0.001909 |
| 16Mar2011 | 16419 | 819.42  | -16.1831 | 2 K.LMFFLKI chr1@1469   | 5.21E-10 | 0.009277 |
| 16Mar2011 | 12673 | 725.88  | -4.04164 | 2 I.NFLQLYDI Splice@chr | 1.22E-10 | 0.002573 |
| 16Mar2011 | 4824  | 412.56  | -22.1132 | 3 _NPRGKKC Splice@chr   | 2.01E-10 | 0.003491 |
| 16Mar2011 | 3841  | 469.74  | 26.75955 | 2 K.YLEGKAE chr5@1929   | 2.81E-10 | 0.005714 |
| 16Mar2011 | 2465  | 506.77  | -14.421  | 2 _VDKNVYF chr4@1192    | 2.38E-10 | 0.004452 |
| 16Mar2011 | 1256  | 459.25  | 4.002563 | 2 R.AIQSASSI chr2@1035  | 9.05E-11 | 0.001909 |
| 16Mar2011 | 6467  | 748.39  | -27.6021 | 2 K.QKSNWH chr5@1229    | 1.79E-11 | 5.30E-04 |
| 16Mar2011 | 13654 | 607     | -9.70672 | 3 I.NRFNISK chrX@1250   | 2.58E-10 | 0.005421 |
| 16Mar2011 | 2348  | 446.77  | 19.99118 | 2 R.PVFSITTK chrX@1588  | 5.53E-10 | 0.009872 |
| 16Mar2011 | 11465 | 472.29  | -0.64754 | 2 _SPLFVPKI chrX@4402   | 1.50E-10 | 0.002979 |
| 16Mar2011 | 14289 | 780.03  | -24.5321 | 3 ?.AQDNYM Splice@chr   | 3.87E-10 | 0.0084   |
| 16Mar2011 | 1149  | 748.36  | 16.41564 | 1 R.ATAGDGI chr3@5845   | 3.04E-12 | 1.42E-04 |
| 16Mar2011 | 17410 | 987.5   | -5.85708 | 3 K.KYLFLDNI chr4@1288  | 4.26E-10 | 0.008961 |
| 16Mar2011 | 6727  | 705.35  | 5.074513 | 2 K.M+15.99 chr5@9075   | 3.08E-10 | 0.006119 |
| 16Mar2011 | 15877 | 722.45  | -4.95112 | 2 R.RK+14.01 Splice@chr | 5.49E-10 | 0.009872 |
| 16Mar2011 | 14571 | 622.33  | 9.587405 | 2 R.AK+14.01 chr2@4270  | 1.82E-10 | 0.003301 |
| 16Mar2011 | 6258  | 626.3   | -9.76097 | 2 R.LCESGAA Splice@chr  | 9.17E-16 | 0        |
| 16Mar2011 | 15209 | 888.47  | 22.8338  | 2 K.DITLEVEA Splice@chr | 4.13E-13 | 0        |
| 16Mar2011 | 11839 | 458.59  | -10.0483 | 3 R.IDVK+14 chr5@1089   | 1.67E-10 | 0.002979 |
| 16Mar2011 | 1194  | 748.36  | 16.41564 | 1 R.ATAGDGI chr3@5845   | 2.32E-10 | 0.004351 |
| 16Mar2011 | 20757 | 508.27  | 7.907877 | 3 K.VRHDVIN chr2@5955   | 1.44E-10 | 0.0029   |

|           |       |         |          |                         |          |          |
|-----------|-------|---------|----------|-------------------------|----------|----------|
| 16Mar2011 | 11239 | 725.88  | -9.68305 | 2 K.ENCRK+1 chr1@1195   | 4.43E-10 | 0.008961 |
| 16Mar2011 | 15070 | 1005.47 | -16.3827 | 2 K.KVELALW Splice@chr  | 2.73E-19 | 0        |
| 16Mar2011 | 19716 | 860.68  | 2.433027 | 4 R.FQSAAIG Splice@chr  | 2.01E-11 | 5.30E-04 |
| 16Mar2011 | 16268 | 677.61  | 5.437891 | 4 K.ESIVSVLT chrX@9696  | 1.66E-10 | 0.002979 |
| 16Mar2011 | 8022  | 1025.61 | -11.6755 | 1 K.LGLGSGL chr5@4945   | 4.36E-11 | 0.001347 |
| 16Mar2011 | 16961 | 868.47  | -17.3524 | 2 L.FLWSK+1 chr2@1462   | 3.11E-10 | 0.006119 |
| 16Mar2011 | 3522  | 510.3   | 12.8833  | 2 R.RHVAVVF chr1@1479   | 7.05E-11 | 0.001459 |
| 16Mar2011 | 18449 | 787.88  | 12.22608 | 2 K.FWREIQM chrX@1650   | 4.26E-11 | 0.001266 |
| 16Mar2011 | 18899 | 792.15  | -18.5783 | 4 K.SGTIFDNI Splice@chr | 1.53E-17 | 0        |
| 16Mar2011 | 3891  | 469.74  | 26.75955 | 2 K.YLEGKAE Splice@chr  | 2.33E-10 | 0.004351 |
| 16Mar2011 | 17878 | 694.87  | 2.550973 | 2 K.YHNITLQ chrX@3836   | 2.02E-10 | 0.003491 |
| 16Mar2011 | 18510 | 634.83  | -9.39461 | 2 R.VDIGDILF Splice@chr | 6.92E-13 | 0        |
| 16Mar2011 | 17269 | 665.37  | -26.6417 | 2 Q.INNK+14 Splice@chr  | 4.17E-10 | 0.008783 |
| 16Mar2011 | 12536 | 894.41  | 13.57006 | 2 _FDSDDTV Splice@chr   | 5.51E-10 | 0.009872 |
| 16Mar2011 | 13520 | 887.93  | 29.43791 | 2 I.DEREESTM Splice@chr | 2.06E-10 | 0.003491 |
| 16Mar2011 | 3580  | 510.3   | 12.8833  | 2 R.RHVAVVF chr1@1479   | 2.55E-10 | 0.005212 |
| 16Mar2011 | 5794  | 741.38  | -23.1647 | 2 K.FPENRHI chr2@1477   | 2.93E-10 | 0.005818 |
| 16Mar2011 | 14669 | 1153.22 | -26.2628 | 3 F.EGIRTGG Splice@chr  | 2.52E-11 | 7.84E-04 |
| 16Mar2011 | 13761 | 833.93  | -9.2006  | 2 _IIEPYVAV Splice@chr  | 3.81E-10 | 0.008305 |
| 16Mar2011 | 11567 | 844.43  | 17.99527 | 2 _EGDGEIE Splice@chr   | 9.02E-11 | 0.001909 |
| 16Mar2011 | 13465 | 887.93  | 29.43791 | 2 I.DEREESTM Splice@chr | 2.54E-10 | 0.005212 |
| 16Mar2011 | 1105  | 748.36  | 16.41564 | 1 R.ATAGDGI chr3@5843   | 2.56E-10 | 0.005421 |
| 16Mar2011 | 8993  | 975.55  | -13.0268 | 1 K.LPKLDAYI chr4@1149  | 1.10E-10 | 0.002128 |
| 16Mar2011 | 6415  | 748.39  | -27.6021 | 2 K.QKSNWH chr5@1229    | 1.73E-11 | 5.30E-04 |
| 16Mar2011 | 16390 | 742.88  | -6.21424 | 2 K.M+15.99 chr4@1648   | 3.50E-10 | 0.007487 |
| 16Mar2011 | 15943 | 722.45  | -4.95112 | 2 R.RK+14.01 Splice@chr | 1.88E-10 | 0.003405 |
| 16Mar2011 | 7584  | 533.82  | 16.26677 | 2 K.TNIYTILTI chr5@1329 | 4.97E-10 | 0.009096 |
| 16Mar2011 | 13755 | 855.41  | -22.1447 | 2 _HVQEVAI Splice@chr   | 1.46E-11 | 2.75E-04 |
| 16Mar2011 | 15091 | 1005.47 | -16.3827 | 2 K.KVELALW Splice@chr  | 1.20E-20 | 0        |
| 16Mar2011 | 2490  | 452.23  | -1.48793 | 2 R.SGEPLSA Splice@chr  | 9.09E-11 | 0.003611 |
| 16Mar2011 | 19264 | 953.02  | 5.934625 | 2 K.EKKCNLIS chr1@1262  | 1.73E-10 | 0.00559  |
| 16Mar2011 | 14516 | 516.3   | 4.106203 | 3 R.NIIFLMVI chrX@1294  | 1.57E-10 | 0.005223 |
| 16Mar2011 | 13758 | 887.93  | 29.43791 | 2 I.DEREESTM Splice@chr | 7.74E-11 | 0.003367 |
| 16Mar2011 | 8138  | 1025.61 | -11.6755 | 1 K.LGLGSGL chr5@4945   | 1.52E-10 | 0.004833 |
| 16Mar2011 | 3915  | 510.3   | 12.8833  | 2 R.RHVAVVF chr1@1479   | 2.05E-10 | 0.00578  |
| 16Mar2011 | 6477  | 748.39  | -27.6021 | 2 K.QKSNWH chr5@1229    | 2.60E-11 | 0.001067 |
| 16Mar2011 | 6058  | 936.48  | 27.86052 | 1 K.LNGGYEC chr2@1191   | 3.49E-11 | 0.001336 |
| 16Mar2011 | 8771  | 438.91  | -18.0263 | 3 _KNDKKTN chr2@4168    | 1.91E-10 | 0.00578  |
| 16Mar2011 | 6205  | 626.29  | -25.769  | 2 R.LCESGAA Splice@chr  | 1.68E-15 | 0        |
| 16Mar2011 | 3855  | 510.3   | 12.8833  | 2 R.RHVAVVF chr1@1479   | 1.41E-10 | 0.004703 |
| 16Mar2011 | 6012  | 936.48  | 27.86052 | 1 K.LNGGYEC chr2@1191   | 4.88E-11 | 0.001742 |
| 16Mar2011 | 18641 | 634.83  | -9.39461 | 2 R.VDIGDILF Splice@chr | 7.25E-13 | 0        |
| 16Mar2011 | 19889 | 1147.24 | 4.705638 | 3 R.FQSAAIG Splice@chr  | 1.17E-13 | 0        |
| 16Mar2011 | 5721  | 741.38  | -23.1647 | 2 K.FPENRHI chr2@1477   | 1.35E-10 | 0.004333 |
| 16Mar2011 | 14332 | 664.36  | -7.23808 | 3 _PTLNK+1 chr1@6526    | 1.34E-10 | 0.004333 |
| 16Mar2011 | 9111  | 975.55  | -20.6673 | 1 K.IPKMPVY chr2@1115   | 8.27E-11 | 0.003367 |
| 16Mar2011 | 18297 | 1129.09 | -16.86   | 2 S.PPK+14.0 chrX@7427  | 3.00E-10 | 0.00906  |

|           |       |         |          |                         |          |          |
|-----------|-------|---------|----------|-------------------------|----------|----------|
| 16Mar2011 | 8079  | 1025.61 | -11.6755 | 1 K.LGLGSGL chr5@4945   | 3.35E-11 | 0.001336 |
| 16Mar2011 | 14443 | 664.7   | 1.197202 | 3 _PTLNK+1 chr1@6526    | 1.73E-10 | 0.00559  |
| 16Mar2011 | 15045 | 965.76  | 6.091444 | 4 R.KTSSCQK chr5@2085   | 6.52E-11 | 0.00272  |
| 16Mar2011 | 2979  | 562.31  | -13.4391 | 2 R.FYLLYLYK Splice@chr | 4.74E-11 | 0.001742 |
| 16Mar2011 | 2552  | 506.77  | -14.421  | 2 _VDKNVYF chr4@1192    | 3.15E-10 | 0.009775 |
| 16Mar2011 | 11680 | 583.82  | -28.5596 | 2 R.LVPITFS chr1@2422   | 2.17E-10 | 0.006405 |
| 16Mar2011 | 10102 | 509.8   | -23.773  | 2 R.SSVIMLIV chr2@5767  | 3.76E-11 | 0.001336 |
| 16Mar2011 | 2652  | 452.23  | -1.48793 | 2 R.SGEPLSA: Splice@chr | 2.67E-10 | 0.00812  |
| 16Mar2011 | 10061 | 528.28  | -20.5773 | 3 _K+14.016 chrX@9378   | 1.21E-10 | 0.004076 |
| 16Mar2011 | 13434 | 944.95  | -29.5487 | 2 _ILCSTDVS Splice@chr  | 2.69E-10 | 0.008487 |
| 16Mar2011 | 14941 | 1182.56 | -21.0399 | 1 R.RFAENQI chr5@1775   | 3.24E-10 | 0.00999  |
| 16Mar2011 | 9164  | 975.55  | -20.6673 | 1 K.IPKMPVY chr2@1115   | 1.16E-10 | 0.003842 |
| 16Mar2011 | 11646 | 472.29  | -0.64754 | 2 _SPLFVPKI chrX@4402   | 2.45E-10 | 0.007514 |
| 16Mar2011 | 19498 | 980.47  | -17.2661 | 3 K.SGTIFDNI Splice@chr | 1.97E-10 | 0.00578  |
| 16Mar2011 | 20363 | 1174.62 | 7.800997 | 2 K.INWAVTI chr4@2890   | 7.78E-17 | 0        |
| 16Mar2011 | 20138 | 828.38  | -20.1128 | 2 K.PNLK+14 chr2@3862   | 3.31E-10 | 0.00999  |
| 16Mar2011 | 18600 | 634.83  | -9.39461 | 2 R.VDIGDILF Splice@chr | 1.40E-11 | 7.93E-04 |
| 16Mar2011 | 12423 | 748.72  | -26.0118 | 3 R.LPSKENL chr4@5635   | 6.87E-11 | 0.002994 |
| 16Mar2011 | 6256  | 626.3   | -9.76097 | 2 R.LCESGAA Splice@chr  | 7.45E-16 | 0        |
| 16Mar2011 | 14708 | 490.74  | -7.60235 | 2 K.DITMEIM chr3@1481   | 3.12E-10 | 0.009664 |
| 16Mar2011 | 1180  | 748.36  | 16.41564 | 1 R.ATAGDGI chr3@5845   | 1.56E-12 | 1.85E-04 |
| 16Mar2011 | 13699 | 887.93  | 29.43791 | 2 I.DEREESTA Splice@chr | 9.34E-11 | 0.003611 |
| 16Mar2011 | 14224 | 664.7   | 1.197202 | 3 _PTLNK+1 chr1@6526    | 1.23E-10 | 0.004076 |
| 16Mar2011 | 2925  | 562.31  | -13.4391 | 2 R.FYLLYLYK Splice@chr | 4.83E-11 | 0.001742 |
| 16Mar2011 | 10162 | 509.8   | -23.773  | 2 R.SSVIMLIV chr2@5767  | 3.24E-11 | 0.001336 |
| 16Mar2011 | 2444  | 452.23  | -1.48793 | 2 R.SGEPLSA: Splice@chr | 1.56E-10 | 0.005223 |
| 16Mar2011 | 15477 | 599.78  | 26.60544 | 2 _M+15.99 chr2@8892    | 9.41E-12 | 6.49E-04 |
| 16Mar2011 | 19235 | 795.65  | -15.5001 | 4 K.SGTIFDNI Splice@chr | 3.70E-13 | 0        |
| 16Mar2011 | 19087 | 792.15  | -18.5783 | 4 K.SGTIFDNI Splice@chr | 1.04E-15 | 0        |
| 16Mar2011 | 11973 | 682.32  | -26.3372 | 2 P.LSSWNVF Splice@chr  | 1.38E-10 | 0.0046   |
| 16Mar2011 | 17903 | 593.34  | 22.02044 | 2 R.NSHTLPL chrX@9076   | 3.09E-11 | 0.001336 |
| 16Mar2011 | 18580 | 787.88  | 12.22608 | 2 K.FWREIQM chrX@1650   | 1.18E-10 | 0.003969 |
| 16Mar2011 | 2600  | 452.23  | -1.48793 | 2 R.SGEPLSA: Splice@chr | 4.92E-11 | 0.001742 |
| 16Mar2011 | 17921 | 1003.18 | 7.145987 | 3 R.CWNRRA Splice@chr   | 1.72E-11 | 9.31E-04 |
| 16Mar2011 | 19928 | 1147.24 | 4.705638 | 3 R.FQSAAIG Splice@chr  | 5.23E-13 | 0        |
| 16Mar2011 | 5773  | 741.38  | -23.1647 | 2 K.FPENRHI chr2@1477   | 2.12E-10 | 0.006153 |
| 16Mar2011 | 19906 | 1147.24 | 4.705638 | 3 R.FQSAAIG Splice@chr  | 2.03E-15 | 0        |
| 16Mar2011 | 1230  | 748.36  | 16.41564 | 1 R.ATAGDGI chr3@5845   | 3.22E-12 | 3.64E-04 |
| 16Mar2011 | 17452 | 987.49  | -16.0038 | 3 K.KYLFLDNI chr4@1288  | 3.14E-11 | 0.001336 |
| 16Mar2011 | 15143 | 1005.47 | -16.3827 | 2 K.KVELALW Splice@chr  | 5.69E-21 | 0        |
| 16Mar2011 | 10046 | 509.8   | -23.773  | 2 R.SSVIMLIV chr2@5767  | 1.01E-10 | 0.003718 |
| 16Mar2011 | 14017 | 607     | -9.70672 | 3 I.NRFNISK chrX@1250   | 7.00E-11 | 0.003262 |
| 16Mar2011 | 6314  | 626.3   | -9.76097 | 2 R.LCESGAA Splice@chr  | 8.72E-16 | 0        |
| 16Mar2011 | 7645  | 437.46  | 16.92139 | 4 R.RGDVPEI chr3@1335   | 1.99E-12 | 0        |
| 16Mar2011 | 3492  | 531.29  | -6.73762 | 2 K.MPMGVH chr2@6727    | 4.47E-10 | 0.008723 |
| 16Mar2011 | 8592  | 509.8   | -23.773  | 2 R.SSVIMLIV chr2@5767  | 1.85E-10 | 0.004357 |
| 16Mar2011 | 14306 | 785.42  | 22.95449 | 1 _MPAWAF chr2@1115     | 2.73E-11 | 5.87E-04 |

|           |       |         |          |                         |          |          |
|-----------|-------|---------|----------|-------------------------|----------|----------|
| 16Mar2011 | 9327  | 701.38  | -29.6051 | 2 F.DKNIWNI chr5@6029   | 1.19E-10 | 0.003113 |
| 16Mar2011 | 4563  | 748.39  | -27.6021 | 2 K.QKSNWH chr5@1229    | 5.19E-12 | 0        |
| 16Mar2011 | 1398  | 493.27  | 25.9144  | 2 G.VAGVGD chrX@9426    | 3.02E-10 | 0.006394 |
| 16Mar2011 | 5064  | 693.87  | -6.6949  | 2 V.ICVAVGD chr5@1065   | 1.12E-10 | 0.002849 |
| 16Mar2011 | 1129  | 452.23  | -1.48793 | 2 R.SGEPLSA Splice@chr  | 7.47E-12 | 0        |
| 16Mar2011 | 18365 | 634.84  | 6.410455 | 2 R.VDIGDILF Splice@chr | 1.52E-12 | 0        |
| 16Mar2011 | 11500 | 1075.05 | -16.1169 | 2 R.TCSK+14. chr2@1255  | 1.44E-10 | 0.003868 |
| 16Mar2011 | 4536  | 566.81  | 0.647242 | 2 I.RIPLDYAE chr5@2047  | 4.14E-10 | 0.008143 |
| 16Mar2011 | 8538  | 509.8   | -23.773  | 2 R.SSVIMLIV chr2@5767  | 9.87E-11 | 0.002319 |
| 16Mar2011 | 11262 | 1042.55 | 20.23923 | 1 R.YLELDNFI Splice@chr | 7.11E-11 | 0.001245 |
| 16Mar2011 | 7984  | 444.23  | 7.06905  | 3 K.TSGELSHI chr4@2396  | 2.08E-10 | 0.005106 |
| 16Mar2011 | 19740 | 1147.24 | 4.705638 | 3 R.FQSAAIG Splice@chr  | 5.08E-15 | 0        |
| 16Mar2011 | 5579  | 533.82  | 16.26677 | 2 K.TNIYTILT chr5@1329  | 4.43E-10 | 0.008723 |
| 16Mar2011 | 11070 | 606.34  | -12.1581 | 2 C.AK+14.01 chr2@2907  | 4.53E-10 | 0.008839 |
| 16Mar2011 | 1265  | 517.29  | -7.09318 | 2 _FRVEVVE Splice@chr   | 4.70E-11 | 8.55E-04 |
| 16Mar2011 | 3721  | 741.38  | -23.1647 | 2 K.FPENRHI chr2@1477   | 4.64E-10 | 0.008955 |
| 16Mar2011 | 13465 | 622.33  | 9.587405 | 2 R.AK+14.01 chr2@4270  | 1.90E-10 | 0.00447  |
| 16Mar2011 | 3869  | 936.48  | 27.86052 | 1 K.LNGGYEC chr2@1191   | 3.55E-11 | 7.22E-04 |
| 16Mar2011 | 8705  | 509.8   | -23.773  | 2 R.SSVIMLIV chr2@5767  | 3.76E-11 | 7.22E-04 |
| 16Mar2011 | 1208  | 562.31  | -13.4391 | 2 R.FYLLYLYK Splice@chr | 7.37E-11 | 0.001245 |
| 16Mar2011 | 19758 | 1147.24 | 4.705638 | 3 R.FQSAAIG Splice@chr  | 4.59E-15 | 0        |
| 16Mar2011 | 5413  | 434.24  | 13.9946  | 3 _RSNDQTI chr5@6378    | 3.03E-11 | 5.87E-04 |
| 16Mar2011 | 18441 | 634.83  | -9.39461 | 2 R.VDIGDILF Splice@chr | 1.45E-12 | 0        |
| 16Mar2011 | 1592  | 510.3   | 12.8833  | 2 R.RHVAYVF chr1@1479   | 1.31E-11 | 0        |
| 16Mar2011 | 11213 | 1042.55 | 20.23923 | 1 R.YLELDNFI Splice@chr | 1.83E-11 | 0        |
| 16Mar2011 | 6169  | 521.31  | -5.34053 | 2 K.FPIGATPI chrX@4552  | 4.39E-10 | 0.008614 |
| 16Mar2011 | 14040 | 1005.47 | -16.3827 | 2 K.KVELALW Splice@chr  | 7.90E-18 | 0        |
| 16Mar2011 | 14720 | 1048.07 | 19.97594 | 2 E.ADRVND Splice@chr   | 3.69E-14 | 0        |
| 16Mar2011 | 11343 | 880.97  | 21.43304 | 2 A.HRK+14.1 chr5@1438  | 2.35E-10 | 0.005571 |
| 16Mar2011 | 19025 | 791.44  | -2.89613 | 2 R.ERRGHTK chr1@7659   | 1.70E-10 | 0.004107 |
| 16Mar2011 | 7552  | 433.27  | -5.78914 | 2 R.GLAAIHR chr2@1579   | 3.68E-11 | 7.22E-04 |
| 16Mar2011 | 8659  | 1017.59 | -22.5744 | 1 R.SSVIMLIV chr2@5767  | 1.88E-11 | 0        |
| 16Mar2011 | 1206  | 517.29  | -7.09318 | 2 _FRVEVVE Splice@chr   | 2.65E-10 | 0.005792 |
| 16Mar2011 | 9664  | 1075.05 | -16.1169 | 2 R.TCSK+14. chr2@1255  | 1.93E-10 | 0.00447  |
| 16Mar2011 | 6113  | 521.31  | -5.34053 | 2 K.FPIGATPI chrX@4552  | 1.73E-10 | 0.004236 |
| 16Mar2011 | 3617  | 741.38  | -23.1647 | 2 K.FPENRHI chr2@1477   | 1.09E-10 | 0.00272  |
| 16Mar2011 | 8640  | 616.33  | -16.7632 | 2 K.LSKSVIFQ chr3@2798  | 3.84E-10 | 0.007683 |
| 16Mar2011 | 8648  | 509.8   | -23.773  | 2 R.SSVIMLIV chr2@5767  | 4.54E-11 | 8.55E-04 |
| 16Mar2011 | 18403 | 634.83  | -9.39461 | 2 R.VDIGDILF Splice@chr | 1.35E-13 | 0        |
| 16Mar2011 | 18491 | 634.83  | -9.39461 | 2 R.VDIGDILF Splice@chr | 2.42E-11 | 4.46E-04 |
| 16Mar2011 | 11311 | 864.45  | -14.392  | 2 K.LKCSFPM chr5@1599   | 1.31E-10 | 0.003624 |
| 16Mar2011 | 13577 | 622.33  | 9.587405 | 2 R.AK+14.01 chr2@4270  | 1.51E-10 | 0.003868 |
| 16Mar2011 | 15562 | 991.51  | 24.02083 | 3 _IYVPADD Splice@chr   | 2.32E-18 | 0        |
| 16Mar2011 | 1691  | 510.3   | 12.8833  | 2 R.RHVAYVF chr1@1479   | 1.34E-10 | 0.003624 |
| 16Mar2011 | 14147 | 1005.47 | -16.3827 | 2 K.KVELALW Splice@chr  | 1.03E-19 | 0        |
| 16Mar2011 | 16153 | 732.07  | 19.51873 | 3 R.ATDDWII Splice@chr  | 3.13E-10 | 0.006495 |
| 16Mar2011 | 9717  | 1075.05 | -16.1169 | 2 R.TCSK+14. chr2@1255  | 1.43E-10 | 0.003868 |

|           |       |         |          |                         |          |          |
|-----------|-------|---------|----------|-------------------------|----------|----------|
| 16Mar2011 | 13517 | 622.33  | 9.587405 | 2 R.AK+14.01 chr2@4270  | 3.21E-10 | 0.006615 |
| 16Mar2011 | 14456 | 1017.61 | -10.7468 | 1 R.RFLGIIGN chr4@8616  | 8.86E-11 | 0.001516 |
| 16Mar2011 | 12938 | 858.47  | -5.67211 | 3 _LETGIKPI Splice@chr  | 4.77E-11 | 8.55E-04 |
| 16Mar2011 | 5468  | 434.24  | 13.9946  | 3 _RSNDQTI chr5@6378    | 6.57E-11 | 0.001245 |
| 16Mar2011 | 14363 | 785.42  | 22.95449 | 1 _MPAWAF chr2@1115     | 2.29E-11 | 4.46E-04 |
| 16Mar2011 | 10641 | 682.32  | -26.3372 | 2 P.LSSWNV Splice@chr   | 4.38E-10 | 0.008614 |
| 16Mar2011 | 18920 | 791.44  | -2.89613 | 2 R.ERRGHTK chr1@7659   | 1.77E-10 | 0.004357 |
| 16Mar2011 | 16697 | 731.39  | -3.59333 | 2 R.VDETLILC chr2@8606  | 8.28E-13 | 0        |
| 16Mar2011 | 13755 | 739.39  | -0.08266 | 2 R.VDETLILC gi 3928909 | 2.47E-12 | 0        |
| 16Mar2011 | 14381 | 888.46  | 11.62323 | 2 K.DITLEVEA Splice@chr | 7.36E-12 | 0        |
| 16Mar2011 | 1645  | 510.3   | 12.8833  | 2 R.RHVAYVF chr1@1479   | 1.33E-10 | 0.003624 |
| 16Mar2011 | 3668  | 741.38  | -23.1647 | 2 K.FPENRHI chr2@1477   | 2.91E-10 | 0.006269 |
| 16Mar2011 | 9380  | 701.38  | -29.6051 | 2 F.DKNIWNI chr5@6029   | 4.14E-10 | 0.008143 |
| 16Mar2011 | 2735  | 412.56  | -22.1132 | 3 _NPRGKKC Splice@chr   | 1.95E-10 | 0.00447  |
| 16Mar2011 | 14509 | 1017.61 | -10.7468 | 1 R.RFLGIIGN chr4@8616  | 1.37E-10 | 0.003624 |
| 16Mar2011 | 12638 | 833.93  | -9.2006  | 2 _IIEPYVAV Splice@chr  | 3.06E-10 | 0.006495 |
| 16Mar2011 | 10639 | 671.37  | -24.0361 | 2 T.FNIVHTQ Splice@chr  | 5.64E-11 | 0.001126 |
| 16Mar2011 | 14089 | 1005.47 | -16.3827 | 2 K.KVELALW Splice@chr  | 1.51E-21 | 0        |
| 16Mar2011 | 14095 | 670.65  | -15.2277 | 3 K.KVELALW Splice@chr  | 3.80E-19 | 0        |
| 16Mar2011 | 16068 | 913.49  | -5.18556 | 2 F.TEMPLGC chrX@9861   | 3.60E-13 | 0        |
| 16Mar2011 | 5910  | 741.38  | -23.1647 | 2 K.FPENRHI chr2@1477   | 3.50E-10 | 0.007867 |
| 16Mar2011 | 1344  | 873.51  | -11.1925 | 1 R.QLGFPIA chr3@2252   | 2.91E-10 | 0.007106 |
| 16Mar2011 | 17761 | 913     | 7.629518 | 2 F.TEMPLGC chrX@9861   | 5.01E-11 | 7.18E-04 |
| 16Mar2011 | 16357 | 1142.59 | 12.00935 | 2 R.TSM+15.1 chrX@1556  | 2.25E-10 | 0.005181 |
| 16Mar2011 | 6050  | 492.25  | 26.55665 | 2 R.M+15.99 Splice@chr  | 2.56E-10 | 0.006198 |
| 16Mar2011 | 15412 | 622.33  | 9.587405 | 2 R.AK+14.01 chr2@4270  | 1.53E-10 | 0.003319 |
| 16Mar2011 | 13314 | 1042.55 | 20.23923 | 1 R.YLELDNFI Splice@chr | 8.14E-11 | 0.00152  |
| 16Mar2011 | 9312  | 738.89  | 6.865531 | 2 K.M+15.99 chr5@5476   | 4.93E-10 | 0.009954 |
| 16Mar2011 | 20864 | 791.44  | -2.89613 | 2 R.ERRGHTK chr1@7659   | 9.06E-11 | 0.001735 |
| 16Mar2011 | 14641 | 833.93  | -9.2006  | 2 _IIEPYVAV Splice@chr  | 1.10E-10 | 0.002507 |
| 16Mar2011 | 19334 | 809.89  | -15.8918 | 2 K.SVSSRITF Splice@chr | 8.83E-11 | 0.001735 |
| 16Mar2011 | 1308  | 873.51  | -11.1925 | 1 R.QLGFPIA chr3@2252   | 3.05E-10 | 0.007203 |
| 16Mar2011 | 8687  | 717.89  | -17.2831 | 2 K.LRGWKNK chr3@8881   | 2.52E-10 | 0.006104 |
| 16Mar2011 | 12535 | 754.38  | -22.1257 | 3 K.VGTVPDF chr1@3344   | 1.82E-10 | 0.003949 |
| 16Mar2011 | 6646  | 748.39  | -27.6021 | 2 K.QKSNNWH chr5@1229   | 1.35E-11 | 1.27E-04 |
| 16Mar2011 | 1120  | 748.36  | 16.41564 | 1 R.ATAGDGI chr3@5843   | 1.28E-10 | 0.002706 |
| 16Mar2011 | 7375  | 693.87  | -6.6949  | 2 V.ICVAVGD chr5@1063   | 1.20E-10 | 0.002706 |
| 16Mar2011 | 15466 | 622.33  | 9.587405 | 2 R.AK+14.01 chr2@4270  | 3.76E-10 | 0.008328 |
| 16Mar2011 | 14580 | 833.93  | -9.2006  | 2 _IIEPYVAV Splice@chr  | 1.76E-10 | 0.003949 |
| 16Mar2011 | 19368 | 665.37  | 11.66767 | 2 R.NIEVSNN chr5@1857   | 4.78E-10 | 0.009673 |
| 16Mar2011 | 12133 | 468.25  | 8.948133 | 2 K.IEDFLGNI chr1@1494  | 3.38E-10 | 0.007569 |
| 16Mar2011 | 9428  | 770.94  | 24.07715 | 2 K.KTARNEK Splice@chr  | 4.18E-10 | 0.008906 |
| 16Mar2011 | 10371 | 976.43  | -7.40623 | 3 K.EGEIVLAC Splice@chr | 3.36E-10 | 0.007569 |
| 16Mar2011 | 8509  | 717.89  | -17.2831 | 2 K.LRGWKNK chr3@8881   | 2.87E-10 | 0.007106 |
| 16Mar2011 | 3283  | 498.58  | 26.57833 | 3 R.SQYLQM Splice@chr   | 9.65E-11 | 0.002074 |
| 16Mar2011 | 15665 | 739.39  | -0.08266 | 2 R.VDETLILC gi 3928909 | 7.19E-12 | 0        |
| 16Mar2011 | 13956 | 564.8   | -11.6918 | 2 R.SPIFLDGT chr5@1896  | 9.51E-11 | 0.002074 |

|           |       |         |          |                         |          |          |
|-----------|-------|---------|----------|-------------------------|----------|----------|
| 16Mar2011 | 942   | 873.51  | -11.1925 | 1 R.QLGFPIAI chr3@2255  | 3.31E-10 | 0.007569 |
| 16Mar2011 | 3436  | 498.58  | 26.57833 | 3 R.SQYLQM Splice@chr   | 6.25E-11 | 8.28E-04 |
| 16Mar2011 | 16035 | 1005.47 | -16.3827 | 2 K.KVELALW Splice@chr  | 2.56E-21 | 0        |
| 16Mar2011 | 20265 | 805.47  | -13.7324 | 2 K.TPIFIPAP chr5@1861  | 1.86E-10 | 0.004045 |
| 16Mar2011 | 12613 | 705.83  | -3.72364 | 2 M.PSMEEV chr5@4890    | 6.68E-15 | 0        |
| 16Mar2011 | 13508 | 1075.05 | -16.1169 | 2 R.TCSK+14. chr2@1255  | 4.32E-10 | 0.008999 |
| 16Mar2011 | 14546 | 617.98  | -7.84814 | 3 K.LTNLSTA Splice@chr  | 4.49E-10 | 0.009193 |
| 16Mar2011 | 19631 | 665.37  | 11.66767 | 2 R.NIEVSNN chr5@1857   | 8.79E-11 | 0.001735 |
| 16Mar2011 | 18221 | 731.91  | 5.809198 | 2 R.KIFFMKM chr3@7469   | 3.95E-10 | 0.00853  |
| 16Mar2011 | 11996 | 725.88  | -9.68305 | 2 K.ENCRK+1 chr1@1195   | 2.85E-10 | 0.007018 |
| 16Mar2011 | 3810  | 510.3   | 12.8833  | 2 R.RHVAVVF chr1@1479   | 7.05E-11 | 0.001053 |
| 16Mar2011 | 11372 | 701.38  | -29.6051 | 2 F.DKNIWNI chr5@6029   | 3.87E-10 | 0.008328 |
| 16Mar2011 | 17816 | 912.99  | -3.34628 | 2 F.TEMPLGC chrX@9861   | 1.87E-12 | 0        |
| 16Mar2011 | 421   | 748.36  | 16.41564 | 1 R.ATAGDGI chr3@5845   | 2.95E-11 | 3.72E-04 |
| 16Mar2011 | 11591 | 1075.05 | -16.1169 | 2 R.TCSK+14. chr2@1255  | 4.44E-10 | 0.009096 |
| 16Mar2011 | 13258 | 1042.55 | 20.23923 | 1 R.YLELDNFI Splice@chr | 6.72E-11 | 8.28E-04 |
| 16Mar2011 | 14992 | 937.96  | 24.29864 | 2 R.ECSQSDS chr2@8876   | 2.30E-10 | 0.00528  |
| 16Mar2011 | 20825 | 791.44  | -2.89613 | 2 R.ERRGHTK chr1@7659   | 2.25E-10 | 0.005181 |
| 16Mar2011 | 5854  | 741.38  | -23.1647 | 2 K.FPENRHI chr2@1477   | 3.54E-10 | 0.007967 |
| 16Mar2011 | 7951  | 434.24  | 13.9946  | 3 _RSNDQTI chr5@6378    | 4.94E-10 | 0.009954 |
| 16Mar2011 | 7950  | 533.82  | 16.26677 | 2 K.TNIYTILTI chr5@1329 | 4.12E-10 | 0.008818 |
| 16Mar2011 | 15719 | 739.39  | -0.08266 | 2 R.VDETLILC chr2@8606  | 1.31E-11 | 1.27E-04 |
| 16Mar2011 | 19050 | 1003.19 | 17.13413 | 3 R.CWNRRA Splice@chr   | 1.09E-11 | 1.27E-04 |
| 16Mar2011 | 8567  | 717.89  | -17.2831 | 2 K.LRGWNK chr3@8881    | 3.39E-10 | 0.007569 |
| 16Mar2011 | 16540 | 1048.06 | 10.52795 | 2 E.ADRVND Splice@chr   | 1.24E-13 | 0        |
| 16Mar2011 | 16195 | 983.96  | -5.49698 | 2 R.SFSTIPDS chr2@1305  | 6.33E-18 | 0        |
| 16Mar2011 | 21985 | 598.64  | 12.32363 | 3 T.FQGVLDN Splice@chr  | 3.79E-10 | 0.008328 |
| 16Mar2011 | 18433 | 731.39  | -3.59333 | 2 R.VDETLILC chr2@8606  | 1.60E-12 | 0        |
| 16Mar2011 | 8750  | 717.89  | -17.2831 | 2 K.LRGWNK chr3@8881    | 1.53E-10 | 0.003319 |
| 16Mar2011 | 18861 | 849.92  | 6.583873 | 2 Q.DSSYFVE Splice@chr  | 1.89E-10 | 0.004045 |
| 16Mar2011 | 11314 | 701.38  | -29.6051 | 2 F.DKNIWNI chr5@6029   | 3.51E-10 | 0.007867 |
| 16Mar2011 | 17875 | 913.5   | 5.790241 | 2 F.TEMPLGC chrX@9861   | 2.16E-11 | 1.27E-04 |
| 16Mar2011 | 16096 | 1005.47 | -16.3827 | 2 K.KVELALW Splice@chr  | 2.38E-19 | 0        |
| 16Mar2011 | 11395 | 825.46  | -13.1033 | 2 R.SARENKT Splice@chr  | 1.26E-10 | 0.002706 |
| 16Mar2011 | 3703  | 510.3   | 12.8833  | 2 R.RHVAVVF chr1@1479   | 1.21E-10 | 0.002706 |
| 16Mar2011 | 5095  | 487.28  | -16.4424 | 2 K.LQTSNGL Splice@chr  | 3.02E-10 | 0.007203 |
| 16Mar2011 | 15987 | 1005.47 | -16.3827 | 2 K.KVELALW Splice@chr  | 9.99E-23 | 0        |
| 16Mar2011 | 1075  | 748.36  | 16.41564 | 1 R.ATAGDGI chr3@5845   | 1.33E-10 | 0.00292  |
| 16Mar2011 | 8627  | 717.89  | -17.2831 | 2 K.LRGWNK chr3@8881    | 3.67E-10 | 0.008144 |
| 16Mar2011 | 21855 | 1147.24 | 4.705638 | 3 R.FQSAAIG Splice@chr  | 1.77E-17 | 0        |
| 16Mar2011 | 19478 | 895.78  | -1.06827 | 3 _RELTEEDI Splice@chr  | 5.37E-11 | 7.18E-04 |
| 16Mar2011 | 17391 | 991.51  | 24.02083 | 3 _IYVPADD Splice@chr   | 5.25E-11 | 7.18E-04 |
| 16Mar2011 | 16415 | 1118.92 | 11.45146 | 3 R.NWKPKT Splice@chr   | 3.32E-10 | 0.007569 |
| 16Mar2011 | 7780  | 434.24  | 13.9946  | 3 _RSNDQTI chr5@6378    | 2.20E-11 | 1.27E-04 |
| 16Mar2011 | 11640 | 1075.05 | -16.1169 | 2 R.TCSK+14. chr2@1255  | 8.23E-11 | 0.001633 |
| 16Mar2011 | 3757  | 510.3   | 12.8833  | 2 R.RHVAVVF chr1@1479   | 2.56E-10 | 0.006198 |
| 16Mar2011 | 20442 | 762.91  | -29.6394 | 2 _TMYAIVK chr4@1217    | 4.78E-10 | 0.009673 |

|           |       |         |          |                         |          |          |
|-----------|-------|---------|----------|-------------------------|----------|----------|
| 16Mar2011 | 21457 | 959.04  | 19.81385 | 2 Y.NNCKLNS chrX@1250   | 7.41E-11 | 0.001053 |
| 16Mar2011 | 20992 | 791.44  | -2.89613 | 2 R.ERRGHTK chr1@7659   | 3.33E-10 | 0.007569 |
| 16Mar2011 | 3650  | 510.3   | 12.8833  | 2 R.RHVAYVF chr1@1479   | 1.30E-10 | 0.002816 |
| 16Mar2011 | 2090  | 562.31  | -13.4391 | 2 R.FYLLYLYK Splice@chr | 8.05E-11 | 0.002512 |
| 16Mar2011 | 12029 | 725.88  | -4.04164 | 2 I.NFLQLYDI Splice@chr | 1.13E-10 | 0.002723 |
| 16Mar2011 | 19409 | 1147.25 | 13.44098 | 3 R.FQSAAIG Splice@chr  | 8.99E-13 | 0        |
| 16Mar2011 | 11901 | 1042.55 | 20.23923 | 1 R.YLELDNFI Splice@chr | 3.68E-11 | 0.001264 |
| 16Mar2011 | 18583 | 791.43  | -15.5678 | 2 R.ERRGHTK chr1@7659   | 1.47E-10 | 0.003439 |
| 16Mar2011 | 14222 | 739.39  | -0.08266 | 2 R.VDETLILC gi 3928909 | 5.33E-12 | 3.13E-04 |
| 16Mar2011 | 9403  | 509.3   | -20.473  | 2 R.SSVIMLIV chr2@5767  | 8.77E-11 | 0.002512 |
| 16Mar2011 | 15777 | 991.51  | 24.02083 | 3 _IYVPADD Splice@chr   | 4.47E-15 | 0        |
| 16Mar2011 | 12292 | 556.85  | 26.98454 | 2 R.NKEPNLII chr2@8282  | 2.86E-10 | 0.005828 |
| 16Mar2011 | 19607 | 1072.51 | -1.90812 | 2 R.NFINNSIE chr4@1703  | 5.35E-11 | 0.002159 |
| 16Mar2011 | 11237 | 708.38  | 4.10295  | 2 R.EQLDQGI Splice@chr  | 2.33E-10 | 0.005423 |
| 16Mar2011 | 6857  | 533.82  | 16.26677 | 2 K.TNIYTILTI chr5@1329 | 4.76E-10 | 0.009979 |
| 16Mar2011 | 4986  | 741.38  | -23.1647 | 2 K.FPENRHI chr2@1477   | 3.46E-10 | 0.007448 |
| 16Mar2011 | 18706 | 791.44  | -2.89613 | 2 R.ERRGHTK chr1@7659   | 2.37E-11 | 9.99E-04 |
| 16Mar2011 | 17111 | 622.08  | 13.36542 | 4 R.RFCAPKT chrX@1320   | 3.02E-10 | 0.006053 |
| 16Mar2011 | 5685  | 748.39  | -27.6021 | 2 K.QKSNWH chr5@1229    | 2.78E-11 | 9.99E-04 |
| 16Mar2011 | 18097 | 634.83  | -9.39461 | 2 R.VDIGDILF Splice@chr | 9.40E-13 | 0        |
| 16Mar2011 | 18158 | 805.47  | -13.7324 | 2 K.TPIFIPAP chr5@1861  | 9.35E-11 | 0.002616 |
| 16Mar2011 | 20603 | 508.27  | -0.64172 | 3 K.VEFMKH chr5@1476    | 6.64E-11 | 0.002283 |
| 16Mar2011 | 2628  | 414.74  | -1.18019 | 2 R.FAAAHLA chrX@1289   | 1.77E-10 | 0.00415  |
| 16Mar2011 | 5872  | 841.48  | -24.9081 | 2 _KLNAK+1 chr1@1427    | 2.07E-10 | 0.004964 |
| 16Mar2011 | 8084  | 438.91  | -18.0263 | 3 _KNDKKT chr2@4168     | 5.79E-11 | 0.002159 |
| 16Mar2011 | 5930  | 841.48  | -24.9081 | 2 _KLNAK+1 chr1@1427    | 2.39E-10 | 0.005517 |
| 16Mar2011 | 10108 | 701.38  | -29.6051 | 2 F.DKNIWNI chr5@6029   | 4.82E-10 | 0.009979 |
| 16Mar2011 | 18137 | 634.83  | -9.39461 | 2 R.VDIGDILF Splice@chr | 6.97E-13 | 0        |
| 16Mar2011 | 12192 | 725.88  | -4.04164 | 2 I.NFLQLYDI Splice@chr | 3.14E-10 | 0.006404 |
| 16Mar2011 | 2620  | 510.3   | 12.8833  | 2 R.RHVAYVF chr1@1479   | 1.23E-10 | 0.002837 |
| 16Mar2011 | 12135 | 725.88  | -4.04164 | 2 I.NFLQLYDI Splice@chr | 2.34E-11 | 9.99E-04 |
| 16Mar2011 | 2723  | 510.3   | 12.8833  | 2 R.RHVAYVF chr1@1479   | 1.44E-10 | 0.00332  |
| 16Mar2011 | 2667  | 510.3   | 12.8833  | 2 R.RHVAYVF chr1@1479   | 1.27E-10 | 0.002837 |
| 16Mar2011 | 16640 | 731.39  | -3.59333 | 2 R.VDETLILC chr2@8606  | 1.98E-11 | 8.76E-04 |
| 16Mar2011 | 18184 | 634.84  | 6.410455 | 2 R.VDIGDILF Splice@chr | 3.46E-12 | 3.13E-04 |
| 16Mar2011 | 10413 | 1075.05 | -16.1169 | 2 R.TCSK+14 chr2@1253   | 4.16E-10 | 0.0091   |
| 16Mar2011 | 16114 | 913.5   | 5.790241 | 2 F.TEMPLGC chrX@9861   | 1.40E-11 | 8.76E-04 |
| 16Mar2011 | 12079 | 725.88  | -4.04164 | 2 I.NFLQLYDI Splice@chr | 5.94E-11 | 0.002159 |
| 16Mar2011 | 4878  | 741.38  | -23.1647 | 2 K.FPENRHI chr2@1477   | 3.34E-10 | 0.006865 |
| 16Mar2011 | 14973 | 751.38  | -7.12052 | 2 _CLDMFSF chr4@3959    | 2.74E-10 | 0.005828 |
| 16Mar2011 | 14556 | 1005.47 | -16.3827 | 2 K.KVELALW Splice@chr  | 6.35E-22 | 0        |
| 16Mar2011 | 15202 | 747.39  | 13.7081  | 2 K.MLRFNEC chr2@8355   | 1.56E-10 | 0.003668 |
| 16Mar2011 | 2527  | 789.44  | 17.96022 | 1 R.FAAPLDR chr3@8971   | 4.02E-10 | 0.008792 |
| 16Mar2011 | 13157 | 833.93  | -9.2006  | 2 _IIEPYVAV Splice@chr  | 2.72E-10 | 0.005738 |
| 16Mar2011 | 18739 | 791.44  | -2.89613 | 2 R.ERRGHTK chr1@7659   | 2.50E-10 | 0.005517 |
| 16Mar2011 | 10712 | 754.39  | -8.94158 | 3 K.VGTVPDF chr1@3344   | 2.79E-10 | 0.005828 |
| 16Mar2011 | 10359 | 1075.05 | -16.1169 | 2 R.TCSK+14 chr2@1253   | 1.82E-10 | 0.004389 |

|           |       |         |          |                         |          |          |
|-----------|-------|---------|----------|-------------------------|----------|----------|
| 16Mar2011 | 4930  | 741.38  | -23.1647 | 2 K.FPENRHI chr2@1477   | 3.46E-10 | 0.007448 |
| 16Mar2011 | 11846 | 1042.55 | 20.23923 | 1 R.YLELDNFI Splice@chr | 5.98E-11 | 0.002159 |
| 16Mar2011 | 18615 | 791.44  | -2.89613 | 2 R.ERRGHTK chr1@7659   | 1.02E-10 | 0.002616 |
| 16Mar2011 | 5290  | 489.28  | 28.87637 | 2 R.RGTASRS chr5@1951   | 2.01E-11 | 8.76E-04 |
| 16Mar2011 | 5632  | 748.39  | -27.6021 | 2 K.QKSNWH chr5@1229    | 5.81E-11 | 0.002159 |
| 16Mar2011 | 12753 | 556.85  | 26.98454 | 2 R.NKEPNLII chr2@8282  | 2.79E-10 | 0.005593 |
| 16Mar2011 | 5896  | 936.48  | 27.86052 | 1 K.LNGGYEC chr2@1191   | 4.03E-11 | 0.001244 |
| 16Mar2011 | 18264 | 634.83  | -9.39461 | 2 R.VDIGDILF Splice@chr | 1.15E-12 | 0        |
| 16Mar2011 | 18737 | 791.44  | -2.89613 | 2 R.ERRGHTK chr1@7659   | 2.76E-10 | 0.00548  |
| 16Mar2011 | 5050  | 571.98  | 0.821277 | 3 K.KNSIFQP chr1@2570   | 2.05E-10 | 0.004257 |
| 16Mar2011 | 16870 | 744.38  | -10.1573 | 3 R.MTRVFSI chr3@1713   | 1.16E-10 | 0.002419 |
| 16Mar2011 | 3786  | 510.3   | 12.8833  | 2 R.RHVAYVF chr1@1479   | 1.21E-10 | 0.002885 |
| 16Mar2011 | 14663 | 739.39  | -0.08266 | 2 R.VDETLILC gi 3928909 | 6.40E-12 | 1.59E-04 |
| 16Mar2011 | 2266  | 600.34  | -18.2932 | 2 K.EKK+14.0 Splice@chr | 4.68E-10 | 0.00974  |
| 16Mar2011 | 14863 | 965.76  | 6.091444 | 4 R.K+14.016 chr5@2085  | 1.04E-10 | 0.002171 |
| 16Mar2011 | 1262  | 748.36  | 16.41564 | 1 R.ATAGDGI chr3@5843   | 5.92E-12 | 1.59E-04 |
| 16Mar2011 | 18829 | 791.43  | -15.5678 | 2 R.ERRGHTK chr1@7659   | 1.19E-10 | 0.002541 |
| 16Mar2011 | 15948 | 669.35  | -28.2834 | 2 K.LEFNISKI chr1@1931  | 6.95E-11 | 0.001847 |
| 16Mar2011 | 7623  | 534.32  | 13.11853 | 2 K.TNIYTILTI chr5@1329 | 3.70E-10 | 0.007704 |
| 16Mar2011 | 1152  | 565.27  | -6.05738 | 2 _RSEFSSNI chr1@1388   | 9.18E-11 | 0.002071 |
| 16Mar2011 | 11513 | 661.4   | -2.4954  | 2 K.LVLIAVN1 chr1@6528  | 4.04E-10 | 0.008816 |
| 16Mar2011 | 4298  | 488.28  | 18.24649 | 2 K.INAEFVG chr4@4519   | 5.61E-11 | 0.001749 |
| 16Mar2011 | 9971  | 509.8   | -23.773  | 2 R.SSVIMLIV chr2@5767  | 4.56E-10 | 0.00965  |
| 16Mar2011 | 14965 | 1005.47 | -16.3827 | 2 K.KVELALW Splice@chr  | 3.52E-22 | 0        |
| 16Mar2011 | 17026 | 665.37  | -26.6417 | 2 Q.INNK+14 Splice@chr  | 1.62E-10 | 0.003467 |
| 16Mar2011 | 4938  | 487.3   | 24.66358 | 2 K.LQTSNGL Splice@chr  | 1.15E-10 | 0.002419 |
| 16Mar2011 | 16911 | 744.38  | -10.1573 | 3 R.MTRVFSI chr3@1713   | 6.35E-11 | 0.001847 |
| 16Mar2011 | 1219  | 748.36  | 16.41564 | 1 R.ATAGDGI chr3@5843   | 1.56E-12 | 1.59E-04 |
| 16Mar2011 | 6214  | 748.39  | -27.6021 | 2 K.QKSNWH chr5@1229    | 3.57E-11 | 0.001109 |
| 16Mar2011 | 15798 | 722.45  | -4.95112 | 2 R.RK+14.01 Splice@chr | 3.79E-10 | 0.008162 |
| 16Mar2011 | 5642  | 741.38  | -23.1647 | 2 K.FPENRHI chr2@1477   | 4.77E-10 | 0.00974  |
| 16Mar2011 | 6430  | 566.81  | 0.647242 | 2 I.RIPLDYAE chr5@2047  | 9.82E-11 | 0.002171 |
| 16Mar2011 | 12698 | 725.88  | -4.04164 | 2 I.NFLQLYDI Splice@chr | 6.95E-11 | 0.001847 |
| 16Mar2011 | 5582  | 741.38  | -23.1647 | 2 K.FPENRHI chr2@1477   | 3.83E-10 | 0.008275 |
| 16Mar2011 | 7321  | 434.24  | 13.9946  | 3 _RSNDQTI chr5@6378    | 5.28E-11 | 0.001749 |
| 16Mar2011 | 2962  | 562.31  | -13.4391 | 2 R.FYLLYLYK Splice@chr | 4.80E-11 | 0.001749 |
| 16Mar2011 | 18307 | 634.83  | -9.39461 | 2 R.VDIGDILF Splice@chr | 8.93E-13 | 0        |
| 16Mar2011 | 12643 | 725.88  | -4.04164 | 2 I.NFLQLYDI Splice@chr | 1.79E-10 | 0.003688 |
| 16Mar2011 | 3726  | 510.3   | 12.8833  | 2 R.RHVAYVF chr1@1479   | 1.30E-10 | 0.002885 |
| 16Mar2011 | 372   | 474.27  | -11.3587 | 2 K.EAVQLKI chr1@4867   | 2.65E-10 | 0.005382 |
| 16Mar2011 | 16367 | 913     | 7.629518 | 2 F.TEMPLGC chrX@9861   | 2.61E-10 | 0.005267 |
| 16Mar2011 | 13570 | 1120.58 | -23.7686 | 2 T.RFNFNTH chr2@1312   | 4.91E-10 | 0.009947 |
| 16Mar2011 | 17551 | 1019.5  | 7.454126 | 3 K.FEISINYM Splice@chr | 4.38E-10 | 0.00933  |
| 16Mar2011 | 7560  | 534.32  | 13.11853 | 2 K.TNIYTILTI chr5@1329 | 4.21E-10 | 0.009116 |
| 16Mar2011 | 17892 | 989.5   | 6.606835 | 2 R.DFVSRRC chr4@1454   | 1.99E-10 | 0.004257 |
| 16Mar2011 | 5943  | 936.48  | 27.86052 | 1 K.LNGGYEC chr2@1191   | 4.29E-11 | 0.001504 |
| 16Mar2011 | 471   | 743.48  | 2.794988 | 1 K.KIGGAGII chr1@2883  | 8.66E-11 | 0.002071 |

|           |       |         |          |                         |          |          |
|-----------|-------|---------|----------|-------------------------|----------|----------|
| 16Mar2011 | 10693 | 546.81  | -1.17329 | 2 K.K+14.016 chr5@5515  | 1.30E-10 | 0.002885 |
| 16Mar2011 | 5968  | 489.28  | 28.87637 | 2 R.RGTASRS chr5@1951   | 1.73E-10 | 0.003688 |
| 16Mar2011 | 14831 | 833.44  | -14.5174 | 1 _DIGYRIP.I chr4@5827  | 3.66E-10 | 0.007704 |
| 16Mar2011 | 3624  | 510.3   | 12.8833  | 2 R.RHVAYVF chr1@1479   | 1.89E-10 | 0.00416  |
| 16Mar2011 | 744   | 515.33  | 11.70274 | 2 _KQKPKFP chr5@2015    | 3.43E-10 | 0.00717  |
| 16Mar2011 | 15626 | 747.39  | 13.7081  | 2 K.MLRFNEC chr2@8355   | 2.93E-10 | 0.005695 |
| 16Mar2011 | 15042 | 983.96  | -5.49698 | 2 R.SFSTIPDS Splice@chr | 3.36E-14 | 0        |
| 16Mar2011 | 1178  | 748.36  | 16.41564 | 1 R.ATAGDGI chr3@5845   | 2.32E-10 | 0.00469  |
| 16Mar2011 | 3843  | 510.3   | 12.8833  | 2 R.RHVAYVF chr1@1479   | 1.21E-10 | 0.002885 |
| 16Mar2011 | 3673  | 510.3   | 12.8833  | 2 R.RHVAYVF chr1@1479   | 1.41E-10 | 0.003129 |
| 16Mar2011 | 14910 | 1005.47 | -16.3827 | 2 K.KVELALW Splice@chr  | 2.05E-22 | 0        |
| 16Mar2011 | 5290  | 438.26  | 15.00593 | 2 R.DPKPPPP chr1@1285   | 1.64E-10 | 0.003467 |
| 16Mar2011 | 4991  | 571.66  | 26.16946 | 3 K.KNSIFQP, chr1@2570  | 4.05E-12 | 1.59E-04 |
| 16Mar2011 | 17585 | 622.08  | 13.36542 | 4 R.RFCAPKT chrX@1320   | 2.77E-10 | 0.00548  |
| 16Mar2011 | 15101 | 983.96  | -5.49698 | 2 R.SFSTIPDS chr2@1305  | 2.65E-16 | 0        |
| 16Mar2011 | 14449 | 622.33  | 9.587405 | 2 R.AK+14.01 chr2@4270  | 3.68E-10 | 0.007704 |
| 16Mar2011 | 15298 | 1165.6  | -6.68407 | 2 Q.VCSKGRF Splice@chr  | 4.01E-10 | 0.00871  |
| 16Mar2011 | 17905 | 1129.1  | -7.98299 | 2 S.PPK+14.0 chrX@7427  | 1.78E-10 | 0.003688 |
| 16Mar2011 | 5527  | 741.38  | -23.1647 | 2 K.FPENRHI, chr2@1477  | 4.28E-10 | 0.009116 |
| 16Mar2011 | 6267  | 748.39  | -27.6021 | 2 K.QKSNWH chr5@1225    | 3.07E-11 | 0.001109 |
| 16Mar2011 | 13732 | 1003.18 | 7.145987 | 3 R.CWNRRA Splice@chr   | 1.78E-12 | 0        |
| 16Mar2011 | 12259 | 722.45  | -4.95112 | 2 R.RK+14.01 Splice@chr | 2.62E-10 | 0.006594 |
| 16Mar2011 | 13658 | 895.78  | -1.06827 | 3 _RELTEEDI Splice@chr  | 3.93E-11 | 6.99E-04 |
| 16Mar2011 | 2236  | 510.3   | 12.8833  | 2 R.RHVAYVF chr1@1479   | 1.32E-10 | 0.002901 |
| 16Mar2011 | 4026  | 439.91  | 17.33685 | 3 K.NSQKNPI chr2@3540   | 1.48E-10 | 0.003345 |
| 16Mar2011 | 1149  | 446.77  | 19.99118 | 2 R.PVFSITTK chrX@1588  | 1.62E-10 | 0.003958 |
| 16Mar2011 | 12576 | 991.51  | 24.02083 | 3 _IYVPADD Splice@chr   | 3.87E-16 | 0        |
| 16Mar2011 | 4517  | 553.33  | -3.70337 | 2 K.PQAKPNI chr5@9002   | 1.09E-12 | 0        |
| 16Mar2011 | 9358  | 606.34  | -12.1581 | 2 C.AK+14.01 chr2@2907  | 2.77E-10 | 0.006729 |
| 16Mar2011 | 13971 | 895.78  | -1.06827 | 3 _RELTEEDI Splice@chr  | 3.52E-13 | 0        |
| 16Mar2011 | 11580 | 1005.47 | -16.3827 | 2 K.KVELALW Splice@chr  | 2.62E-20 | 0        |
| 16Mar2011 | 1709  | 562.31  | -13.4391 | 2 R.FYLLLYLK Splice@chr | 5.57E-11 | 0.001539 |
| 16Mar2011 | 1189  | 446.77  | 19.99118 | 2 R.PVFSITTK chrX@1588  | 3.71E-10 | 0.008261 |
| 16Mar2011 | 9348  | 516.29  | 9.357636 | 2 K.VSVDVLE chrX@1218   | 1.37E-10 | 0.003204 |
| 16Mar2011 | 3979  | 439.91  | 17.33685 | 3 K.NSQKNPI chr2@3540   | 8.23E-11 | 0.002146 |
| 16Mar2011 | 854   | 570.31  | -1.66134 | 2 Q.EDADVLI chr3@7536   | 4.14E-10 | 0.009991 |
| 16Mar2011 | 697   | 873.51  | -11.1925 | 1 R.QLGFPIA chr3@2252   | 2.84E-10 | 0.006729 |
| 16Mar2011 | 1656  | 562.31  | -13.4391 | 2 R.FYLLLYLK Splice@chr | 6.40E-11 | 0.002032 |
| 16Mar2011 | 10394 | 1120.58 | -23.7686 | 2 T.RFNFNIT\ chr2@1312  | 8.24E-11 | 0.002146 |
| 16Mar2011 | 9709  | 1075.05 | -16.1169 | 2 R.TCSK+14. chr2@1253  | 1.93E-10 | 0.004539 |
| 16Mar2011 | 4381  | 748.39  | -27.6021 | 2 K.QKSNWH chr5@1225    | 7.51E-11 | 0.002146 |
| 16Mar2011 | 2419  | 510.3   | 12.8833  | 2 R.RHVAYVF chr1@1479   | 9.11E-11 | 0.002146 |
| 16Mar2011 | 3731  | 741.38  | -23.1647 | 2 K.FPENRHI, chr2@1477  | 1.03E-10 | 0.002463 |
| 16Mar2011 | 14539 | 805.46  | -26.0992 | 2 K.TPIFIPAP, chr5@1861 | 3.69E-10 | 0.008261 |
| 16Mar2011 | 12156 | 747.39  | 13.7081  | 2 K.MLRFNEC chr2@8355   | 2.53E-11 | 3.55E-04 |
| 16Mar2011 | 11291 | 739.39  | -0.08266 | 2 R.VDETLILC gi 3928905 | 5.69E-12 | 1.82E-04 |
| 16Mar2011 | 12792 | 879.14  | -17.6078 | 3 R.GMDKVR chr5@1677    | 1.08E-10 | 0.002587 |

|           |       |         |          |                         |          |          |
|-----------|-------|---------|----------|-------------------------|----------|----------|
| 16Mar2011 | 4011  | 936.48  | 27.86052 | 1 K.LNGGYEC chr2@1191   | 2.82E-11 | 3.55E-04 |
| 16Mar2011 | 14537 | 634.83  | -9.39461 | 2 R.VDIGDILF Splice@chr | 3.37E-12 | 0        |
| 16Mar2011 | 2283  | 510.3   | 12.8833  | 2 R.RHVAYVF chr1@1479   | 3.29E-10 | 0.007428 |
| 16Mar2011 | 3837  | 741.38  | -23.1647 | 2 K.FPENRHI chr2@1477   | 9.87E-11 | 0.002463 |
| 16Mar2011 | 13655 | 902.54  | 17.06109 | 1 R.RCGVIGL chr3@1087   | 2.56E-10 | 0.006453 |
| 16Mar2011 | 6907  | 827.45  | 15.14008 | 1 R.SAHISAN chr4@5582   | 2.55E-10 | 0.006303 |
| 16Mar2011 | 11873 | 599.78  | 26.60544 | 2 _M+15.99 chr2@8892    | 1.42E-10 | 0.003204 |
| 16Mar2011 | 15446 | 1147.24 | 4.705638 | 3 R.FQSAAIG Splice@chr  | 9.49E-14 | 0        |
| 16Mar2011 | 13327 | 731.39  | -3.59333 | 2 R.VDETLILC chr2@8606  | 1.57E-12 | 0        |
| 16Mar2011 | 3784  | 741.38  | -23.1647 | 2 K.FPENRHI chr2@1477   | 3.82E-10 | 0.008544 |
| 16Mar2011 | 11123 | 622.33  | 9.587405 | 2 R.AK+14.01 chr2@4270  | 2.06E-10 | 0.005143 |
| 16Mar2011 | 7910  | 701.38  | -29.6051 | 2 F.DKNIWNI chr5@6029   | 2.62E-10 | 0.006594 |
| 16Mar2011 | 6381  | 770.94  | 24.07715 | 2 K.KTARNEK Splice@chr  | 3.83E-10 | 0.008544 |
| 16Mar2011 | 13288 | 731.39  | -3.59333 | 2 R.VDETLILC chr2@8606  | 5.67E-12 | 1.82E-04 |
| 16Mar2011 | 8158  | 1075.05 | -16.1169 | 2 R.TCSK+14. chr2@1253  | 3.68E-10 | 0.008261 |
| 16Mar2011 | 9508  | 1042.54 | 10.61924 | 1 R.YLELDNFI Splice@chr | 9.97E-11 | 0.002463 |
| 16Mar2011 | 9460  | 1042.55 | 20.23923 | 1 R.YLELDNFI Splice@chr | 6.61E-11 | 0.002032 |
| 16Mar2011 | 11598 | 1056.56 | 28.0642  | 3 I.SRVEDDS Splice@chr  | 1.17E-12 | 0        |
| 16Mar2011 | 7371  | 599.32  | -23.327  | 2 R.FTGFELE chrX@1690   | 2.04E-11 | 1.82E-04 |
| 16Mar2011 | 5189  | 434.24  | 13.9946  | 3 _RSNDQTI chr5@6378    | 1.47E-10 | 0.003345 |
| 16Mar2011 | 15441 | 860.68  | 2.433027 | 4 R.FQSAAIG Splice@chr  | 7.08E-11 | 0.002146 |
| 16Mar2011 | 12992 | 732.07  | 19.51873 | 3 R.ATDDWII Splice@chr  | 1.40E-10 | 0.003204 |
| 16Mar2011 | 8053  | 1075.05 | -16.1169 | 2 R.TCSK+14. chr2@1253  | 1.76E-10 | 0.004253 |
| 16Mar2011 | 2372  | 510.3   | 12.8833  | 2 R.RHVAYVF chr1@1479   | 1.46E-10 | 0.003345 |
| 16Mar2011 | 2327  | 510.3   | 12.8833  | 2 R.RHVAYVF chr1@1479   | 6.54E-12 | 1.82E-04 |
| 16Mar2011 | 2504  | 510.28  | -26.3658 | 2 R.RHVAYVF chr1@1479   | 3.24E-10 | 0.007428 |
| 16Mar2011 | 11974 | 1048.07 | 19.97594 | 2 E.ADRVND Splice@chr   | 2.96E-13 | 0        |
| 16Mar2011 | 11529 | 1005.47 | -16.3827 | 2 K.KVELALW Splice@chr  | 1.84E-22 | 0        |
| 16Mar2011 | 14489 | 787.88  | 12.22608 | 2 K.FWREIQM chrX@1650   | 1.67E-10 | 0.004098 |
| 16Mar2011 | 14494 | 634.84  | 6.410455 | 2 R.VDIGDILF Splice@chr | 1.67E-12 | 0        |
| 16Mar2011 | 12172 | 738.9   | 4.880241 | 2 R.DQNFWK chr1@7263    | 2.16E-10 | 0.005594 |
| 16Mar2011 | 11286 | 833.44  | -21.0656 | 1 R.NLGVHHI chr2@1106   | 1.82E-10 | 0.004539 |
| 16Mar2011 | 4905  | 693.87  | -6.6949  | 2 V.ICVAVGD chr5@1063   | 2.14E-10 | 0.005444 |
| 16Mar2011 | 15436 | 1147.24 | 4.705638 | 3 R.FQSAAIG Splice@chr  | 6.05E-15 | 0        |
| 16Mar2011 | 7469  | 897.42  | -27.6753 | 3 _QVREMH Splice@chr    | 2.86E-10 | 0.009598 |
| 16Mar2011 | 12831 | 731.39  | -3.59333 | 2 R.VDETLILC chr2@8606  | 2.19E-10 | 0.007668 |
| 16Mar2011 | 13763 | 649.9   | -9.68814 | 2 K.LKIITNLEI chr2@6716 | 1.33E-10 | 0.004702 |
| 16Mar2011 | 12788 | 731.39  | -3.59333 | 2 R.VDETLILC chr2@8606  | 3.88E-11 | 0.001471 |
| 16Mar2011 | 8269  | 468.24  | -12.4751 | 2 K.IEDFLGNI chr1@1494  | 2.53E-10 | 0.008884 |
| 16Mar2011 | 9117  | 1042.55 | 20.23923 | 1 R.YLELDNFI Splice@chr | 6.29E-11 | 0.002492 |
| 16Mar2011 | 4440  | 789.41  | 13.47061 | 1 R.DLSSSALF chr2@3718  | 1.76E-10 | 0.006437 |
| 16Mar2011 | 13952 | 965.53  | -19.1507 | 2 F.FLRQIRQI chr4@3226  | 1.51E-10 | 0.005344 |
| 16Mar2011 | 14400 | 791.44  | -2.89613 | 2 R.ERRGHTK chr1@7659   | 9.09E-11 | 0.003288 |
| 16Mar2011 | 10590 | 516.3   | 4.106203 | 3 R.NIIFLMVI chrX@1294  | 1.62E-10 | 0.005818 |
| 16Mar2011 | 2368  | 510.3   | 12.8833  | 2 R.RHVAYVF chr1@1479   | 1.28E-10 | 0.004228 |
| 16Mar2011 | 286   | 544.29  | 17.07677 | 2 K.QNFIHET chr1@5247   | 3.12E-11 | 9.36E-04 |
| 16Mar2011 | 1562  | 562.31  | -13.4391 | 2 R.FYLLYLYK Splice@chr | 6.75E-11 | 0.002651 |

|           |       |         |          |                         |          |          |
|-----------|-------|---------|----------|-------------------------|----------|----------|
| 16Mar2011 | 2608  | 510.3   | 12.8833  | 2 R.RHVAYVF chr1@1479   | 1.33E-10 | 0.004702 |
| 16Mar2011 | 6711  | 827.45  | 15.14008 | 1 R.SAHISAN chr4@5582   | 9.65E-11 | 0.003431 |
| 16Mar2011 | 14470 | 791.44  | -2.89613 | 2 R.ERRGHTK chr1@7659   | 1.31E-10 | 0.004702 |
| 16Mar2011 | 3990  | 626.3   | -9.76097 | 2 R.LCESGAA Splice@chr  | 9.76E-16 | 0        |
| 16Mar2011 | 10926 | 739.39  | -0.08266 | 2 R.VDETLILC gi 3928909 | 4.37E-12 | 0        |
| 16Mar2011 | 2513  | 510.3   | 12.8833  | 2 R.RHVAYVF chr1@1479   | 1.84E-10 | 0.006437 |
| 16Mar2011 | 4389  | 789.41  | 13.47061 | 1 R.DLSSSALF chr2@3718  | 1.76E-10 | 0.006437 |
| 16Mar2011 | 3913  | 787.43  | -1.78505 | 1 K.SDAAPAK chrX@8018   | 8.86E-11 | 0.003288 |
| 16Mar2011 | 4088  | 748.39  | -27.6021 | 2 K.QKSNWH chr5@1229    | 1.92E-11 | 9.36E-04 |
| 16Mar2011 | 12368 | 832.19  | 6.682333 | 4 K.FFKDIMV chr3@4692   | 1.85E-10 | 0.006437 |
| 16Mar2011 | 9005  | 498.77  | 16.7991  | 2 R.FDELGLFI Splice@chr | 1.82E-10 | 0.006437 |
| 16Mar2011 | 7885  | 1075.05 | -16.1169 | 2 R.TCSK+14. chr2@1253  | 2.57E-10 | 0.009021 |
| 16Mar2011 | 15262 | 980.17  | 9.391753 | 3 K.EHVGILT chr1@8943   | 3.82E-11 | 0.001106 |
| 16Mar2011 | 11529 | 1048.06 | 10.52795 | 2 E.ADRVND Splice@chr   | 1.31E-13 | 0        |
| 16Mar2011 | 3881  | 936.48  | 27.86052 | 1 K.LNGGYEC chr2@1191   | 1.75E-11 | 9.36E-04 |
| 16Mar2011 | 7640  | 825.46  | -13.1033 | 2 R.SARENKT Splice@chr  | 6.91E-11 | 0.002651 |
| 16Mar2011 | 12057 | 991.51  | 24.02083 | 3 _IYVPADD Splice@chr   | 1.93E-13 | 0        |
| 16Mar2011 | 12961 | 665.37  | -26.6417 | 2 Q.INNK+14 Splice@chr  | 2.19E-10 | 0.007668 |
| 16Mar2011 | 2463  | 510.3   | 12.8833  | 2 R.RHVAYVF chr1@1479   | 1.23E-10 | 0.004228 |
| 16Mar2011 | 2318  | 510.3   | 12.8833  | 2 R.RHVAYVF chr1@1479   | 1.28E-10 | 0.004228 |
| 16Mar2011 | 2566  | 510.3   | 12.8833  | 2 R.RHVAYVF chr1@1479   | 1.97E-10 | 0.007039 |
| 16Mar2011 | 17677 | 913.5   | 5.790241 | 2 F.TEMPLGC chrX@9861   | 2.12E-11 | 5.77E-04 |
| 16Mar2011 | 8036  | 533.82  | 16.26677 | 2 K.TNIYTILT chr5@1329  | 1.82E-10 | 0.004117 |
| 16Mar2011 | 6367  | 936.48  | 27.86052 | 1 K.LNGGYEC chr2@1191   | 5.90E-11 | 0.001408 |
| 16Mar2011 | 7548  | 693.86  | -21.1418 | 2 V.ICVAVGD chr5@1063   | 2.41E-10 | 0.005712 |
| 16Mar2011 | 6708  | 626.3   | -9.76097 | 2 R.LCESGAA Splice@chr  | 1.13E-15 | 0        |
| 16Mar2011 | 11070 | 831.39  | -27.5413 | 2 K.KFTFEIEE chrX@1364  | 3.89E-11 | 0.001096 |
| 16Mar2011 | 18543 | 665.37  | -26.6417 | 2 Q.INNK+14 Splice@chr  | 3.76E-10 | 0.008255 |
| 16Mar2011 | 19595 | 649.9   | -9.68814 | 2 K.LKIITNLEI chr2@6716 | 1.29E-10 | 0.003093 |
| 16Mar2011 | 10739 | 688.03  | -17.0347 | 3 L.IFK+14.01 chr3@8836 | 4.32E-10 | 0.009011 |
| 16Mar2011 | 3813  | 510.3   | 12.8833  | 2 R.RHVAYVF chr1@1479   | 6.40E-11 | 0.001408 |
| 16Mar2011 | 14972 | 664.7   | 1.197202 | 3 _PTLNK+1. chr1@6526   | 2.88E-10 | 0.006041 |
| 16Mar2011 | 13129 | 498.76  | -3.24946 | 2 R.FDELGLFI Splice@chr | 1.82E-10 | 0.004117 |
| 16Mar2011 | 14354 | 887.93  | 29.43791 | 2 I.DEREESTA Splice@chr | 1.54E-10 | 0.003768 |
| 16Mar2011 | 22630 | 508.27  | 7.907877 | 3 K.VRHDVIN chr2@5955   | 5.16E-11 | 0.001096 |
| 16Mar2011 | 18954 | 622.08  | 13.36542 | 4 R.RFCAPKT chrX@1320   | 3.04E-10 | 0.0065   |
| 16Mar2011 | 1132  | 748.36  | 16.41564 | 1 R.ATAGDGI chr3@5843   | 3.62E-11 | 0.001096 |
| 16Mar2011 | 20016 | 634.83  | -9.39461 | 2 R.VDIGDILF Splice@chr | 1.60E-12 | 0        |
| 16Mar2011 | 16091 | 1056.56 | 28.0642  | 3 I.SRVEDDS Splice@chr  | 3.99E-14 | 0        |
| 16Mar2011 | 525   | 515.33  | 11.70274 | 2 _KQKPKFP chr5@2015    | 2.29E-10 | 0.005441 |
| 16Mar2011 | 6651  | 626.3   | -9.76097 | 2 R.LCESGAA Splice@chr  | 3.05E-16 | 0        |
| 16Mar2011 | 18318 | 731.39  | -3.59333 | 2 R.VDETLILC chr2@8606  | 4.34E-12 | 1.32E-04 |
| 16Mar2011 | 15520 | 622.33  | 9.587405 | 2 R.AK+14.01 chr2@4270  | 4.65E-11 | 0.001096 |
| 16Mar2011 | 15898 | 759.4   | -15.0495 | 2 K.FIDANLQ chr4@8206   | 1.77E-10 | 0.004117 |
| 16Mar2011 | 22191 | 760.4   | -4.0463  | 3 _TQTNTKI chrX@7978    | 4.04E-10 | 0.008681 |
| 16Mar2011 | 5572  | 438.25  | -7.88684 | 2 R.DPKPPPP chr1@1285   | 1.22E-10 | 0.002991 |
| 16Mar2011 | 6007  | 741.38  | -23.1647 | 2 K.FPENRHI chr2@1477   | 2.56E-10 | 0.005892 |

|           |       |         |          |                          |          |          |
|-----------|-------|---------|----------|--------------------------|----------|----------|
| 16Mar2011 | 14917 | 858.48  | 6.006088 | 3 _..LETGIHKP Splice@chr | 5.98E-11 | 0.001408 |
| 16Mar2011 | 16146 | 792.67  | 25.51992 | 4 I.SRVEDDS Splice@chr   | 1.86E-11 | 4.71E-04 |
| 16Mar2011 | 10844 | 954.44  | -18.1567 | 2 C.QREEIEYC Splice@chr  | 1.56E-10 | 0.003846 |
| 16Mar2011 | 6937  | 748.39  | -27.6021 | 2 K.QKSNWH chr5@1229     | 9.63E-12 | 2.50E-04 |
| 16Mar2011 | 2278  | 501.34  | 17.68876 | 2 K.KMIKAGL chr1@1904    | 3.01E-11 | 7.97E-04 |
| 16Mar2011 | 3866  | 510.3   | 12.8833  | 2 R.RHVAYVF chr1@1479    | 1.34E-10 | 0.003184 |
| 16Mar2011 | 3111  | 562.31  | -13.4391 | 2 R.FYLLLYLK Splice@chr  | 5.73E-11 | 0.001408 |
| 16Mar2011 | 1183  | 748.36  | 16.41564 | 1 R.ATAGDGI chr3@5845    | 1.76E-10 | 0.004117 |
| 16Mar2011 | 3921  | 510.3   | 12.8833  | 2 R.RHVAYVF chr1@1479    | 7.58E-12 | 2.50E-04 |
| 16Mar2011 | 9696  | 975.55  | -20.6673 | 1 K.IPKMPVY chr2@1115    | 1.10E-10 | 0.0025   |
| 16Mar2011 | 6324  | 936.48  | 27.86052 | 1 K.LNGGYEC chr2@1191    | 4.22E-11 | 0.001096 |
| 16Mar2011 | 15930 | 1015.15 | -9.04986 | 3 S.RTEDPNL Splice@chr   | 2.23E-15 | 0        |
| 16Mar2011 | 16081 | 1004.97 | -14.712  | 2 K.KVELALW Splice@chr   | 5.14E-22 | 0        |
| 16Mar2011 | 21030 | 959.54  | 18.06294 | 2 Y.NNCKLNS chrX@1250    | 1.71E-10 | 0.003939 |
| 16Mar2011 | 10891 | 976.43  | -7.40623 | 3 K.EGEIVLAC Splice@chr  | 1.01E-10 | 0.002098 |
| 16Mar2011 | 13412 | 1187.91 | -26.8667 | 3 K.NQPIHVF Splice@chr   | 3.02E-11 | 7.97E-04 |
| 16Mar2011 | 18850 | 1003.18 | 7.145987 | 3 R.CWNRRA Splice@chr    | 1.52E-11 | 4.71E-04 |
| 16Mar2011 | 20632 | 791.44  | -2.89613 | 2 R.ERRGHTK chr1@7659    | 1.55E-10 | 0.003846 |
| 16Mar2011 | 18994 | 1003.19 | 17.13413 | 3 R.CWNRRA Splice@chr    | 2.17E-14 | 0        |
| 16Mar2011 | 14504 | 588.32  | -28.1325 | 2 K.M+15.99 chr5@1328    | 3.56E-10 | 0.007799 |
| 16Mar2011 | 3754  | 510.3   | 12.8833  | 2 R.RHVAYVF chr1@1479    | 1.21E-10 | 0.002991 |
| 16Mar2011 | 21456 | 860.68  | 2.433027 | 4 R.FQSAAIG Splice@chr   | 3.47E-13 | 0        |
| 16Mar2011 | 17845 | 732.07  | 19.51873 | 3 R.ATDDWII Splice@chr   | 1.67E-10 | 0.003939 |
| 16Mar2011 | 565   | 515.33  | 11.70274 | 2 _..KQKPKFP chr5@2015   | 2.30E-10 | 0.005441 |
| 16Mar2011 | 19972 | 634.83  | -9.39461 | 2 R.VDIGDILF Splice@chr  | 3.01E-13 | 0        |
| 16Mar2011 | 5016  | 805.42  | -29.245  | 1 K.KMGGGN chr5@9928     | 1.66E-10 | 0.003846 |
| 16Mar2011 | 15728 | 739.39  | -0.08266 | 2 R.VDETLILC gi 3928909  | 6.86E-12 | 2.50E-04 |
| 16Mar2011 | 8558  | 1025.61 | -11.6755 | 1 K.LGLGSGL chr5@4945    | 2.28E-11 | 5.77E-04 |
| 16Mar2011 | 12728 | 682.32  | -26.3372 | 2 P.LSSWNVF Splice@chr   | 1.98E-10 | 0.004996 |
| 16Mar2011 | 15027 | 653.89  | -9.62894 | 2 K.QINLKLQ chr2@1024    | 4.21E-10 | 0.008844 |
| 16Mar2011 | 14643 | 606.66  | -18.8783 | 3 I.NRFNISK chrX@1250    | 1.87E-10 | 0.004411 |
| 16Mar2011 | 20943 | 980.47  | -17.2661 | 3 K.SGTIFDNI Splice@chr  | 4.51E-10 | 0.009439 |
| 16Mar2011 | 4015  | 517.33  | 6.214252 | 2 R.KMLRMIL chr1@1158    | 2.03E-10 | 0.005079 |
| 16Mar2011 | 11560 | 1075.05 | -16.1169 | 2 R.TCSK+14. chr2@1255   | 4.20E-10 | 0.008844 |
| 16Mar2011 | 16024 | 1005.47 | -16.3827 | 2 K.KVELALW Splice@chr   | 1.68E-22 | 0        |
| 16Mar2011 | 11160 | 663.85  | -5.06443 | 2 N.KMIFSMI chr4@8622    | 3.23E-10 | 0.006778 |
| 16Mar2011 | 15026 | 938.46  | 22.50833 | 2 R.ECSQSDS chr2@8876    | 4.63E-10 | 0.009439 |
| 16Mar2011 | 16759 | 675.33  | -24.7716 | 2 K.IEMEFLVI chrX@1244   | 3.43E-10 | 0.007335 |
| 16Mar2011 | 14860 | 858.48  | 6.006088 | 3 _..LETGIHKP Splice@chr | 5.58E-12 | 2.50E-04 |
| 16Mar2011 | 13321 | 1042.55 | 20.23923 | 1 R.YLELDNFI Splice@chr  | 2.53E-11 | 5.77E-04 |
| 16Mar2011 | 18594 | 665.37  | -26.6417 | 2 Q.INNK+14 Splice@chr   | 3.02E-10 | 0.0065   |
| 16Mar2011 | 17732 | 912.99  | -3.34628 | 2 F.TEMPLGC chrX@9861    | 6.37E-12 | 2.50E-04 |
| 16Mar2011 | 20061 | 634.84  | 6.410455 | 2 R.VDIGDILF Splice@chr  | 7.88E-13 | 0        |
| 16Mar2011 | 4095  | 510.3   | 12.8833  | 2 R.RHVAYVF chr1@1479    | 1.21E-10 | 0.002983 |
| 16Mar2011 | 14020 | 887.93  | 29.43791 | 2 I.DEREESTN Splice@chr  | 5.26E-11 | 0.002007 |
| 16Mar2011 | 1880  | 665.38  | -3.2154  | 2 R.QLQM+1 chr5@7160     | 2.45E-10 | 0.006232 |
| 16Mar2011 | 14270 | 833.93  | -9.2006  | 2 _..IIEPYVAV Splice@chr | 5.31E-11 | 0.002007 |

|           |       |         |          |                         |          |          |
|-----------|-------|---------|----------|-------------------------|----------|----------|
| 16Mar2011 | 17276 | 742.88  | -6.21424 | 2 K.M+15.99 chr4@1648   | 1.32E-10 | 0.003091 |
| 16Mar2011 | 9212  | 724.35  | 19.12636 | 3 V.CLTEEGK Splice@chr  | 8.84E-11 | 0.002711 |
| 16Mar2011 | 6457  | 936.48  | 27.86052 | 1 K.LNGGYEC chr2@1191   | 2.21E-11 | 7.55E-04 |
| 16Mar2011 | 14692 | 938.46  | 22.50833 | 2 R.ECSQSDS chr2@8876   | 1.75E-10 | 0.004096 |
| 16Mar2011 | 17415 | 913     | 7.629518 | 2 F.TEMPLGC chrX@9861   | 2.06E-11 | 7.55E-04 |
| 16Mar2011 | 18083 | 731.4   | 10.11146 | 2 R.VDETLILC chr2@8606  | 5.57E-13 | 0        |
| 16Mar2011 | 18909 | 809.89  | -15.8918 | 2 K.SVSSRITF Splice@chr | 1.53E-10 | 0.003394 |
| 16Mar2011 | 15056 | 622.33  | 9.587405 | 2 R.AK+14.01 chr2@4270  | 1.90E-10 | 0.004302 |
| 16Mar2011 | 5753  | 438.25  | -7.88684 | 2 R.DPKPPPP chr1@1285   | 6.03E-11 | 0.00245  |
| 16Mar2011 | 6034  | 741.38  | -23.1647 | 2 K.FPENRHI chr2@1477   | 3.34E-10 | 0.008047 |
| 16Mar2011 | 19843 | 634.83  | -9.39461 | 2 R.VDIGDILF Splice@chr | 2.00E-13 | 0        |
| 16Mar2011 | 17466 | 913     | 7.629518 | 2 F.TEMPLGC chrX@9861   | 2.27E-10 | 0.005635 |
| 16Mar2011 | 1253  | 502.26  | 17.41275 | 2 R.EENEELLI chr5@1422  | 3.73E-10 | 0.009106 |
| 16Mar2011 | 20334 | 968.13  | 14.47345 | 3 _CSIRPISG Splice@chr  | 1.01E-10 | 0.00278  |
| 16Mar2011 | 21199 | 794.38  | -28.189  | 1 _TMSKNGI chr4@8922    | 1.62E-10 | 0.003589 |
| 16Mar2011 | 12384 | 671.37  | -24.0361 | 2 T.FNIVHTQ Splice@chr  | 2.45E-10 | 0.006232 |
| 16Mar2011 | 19797 | 634.84  | 6.410455 | 2 R.VDIGDILF Splice@chr | 2.16E-13 | 0        |
| 16Mar2011 | 17089 | 677.61  | 5.437891 | 4 K.ESIVSVLT chrX@9696  | 2.02E-10 | 0.005033 |
| 16Mar2011 | 1288  | 748.36  | 16.41564 | 1 R.ATAGDGI chr3@5845   | 1.56E-12 | 1.33E-04 |
| 16Mar2011 | 17013 | 895.92  | -18.2779 | 2 K.QCNVYFS chr1@1476   | 3.55E-10 | 0.008825 |
| 16Mar2011 | 10540 | 687.7   | -10.5473 | 3 L.IFK+14.01 chr3@8836 | 1.60E-10 | 0.003589 |
| 16Mar2011 | 15595 | 1005.47 | -16.3827 | 2 K.KVELALW Splice@chr  | 2.31E-22 | 0        |
| 16Mar2011 | 19789 | 787.88  | 12.22608 | 2 K.FWREIQM chrX@1650   | 2.95E-10 | 0.007298 |
| 16Mar2011 | 5355  | 707.37  | -3.97474 | 1 K.GGFLGEK chr4@1416   | 4.40E-10 | 0.009899 |
| 16Mar2011 | 20292 | 968.13  | 14.47345 | 3 _CSIRPISG Splice@chr  | 2.49E-10 | 0.006334 |
| 16Mar2011 | 21149 | 1148.61 | -20.8481 | 2 K.FQVTLDC chr1@5540   | 1.44E-10 | 0.003394 |
| 16Mar2011 | 15704 | 1005.47 | -16.3827 | 2 K.KVELALW Splice@chr  | 5.55E-22 | 0        |
| 16Mar2011 | 6093  | 741.38  | -23.1647 | 2 K.FPENRHI chr2@1477   | 3.60E-10 | 0.008825 |
| 16Mar2011 | 1688  | 801.46  | -26.9469 | 1 K.WAGVVL chr4@3669    | 7.32E-11 | 0.002518 |
| 16Mar2011 | 10495 | 509.8   | -23.773  | 2 R.SSVIMLIV chr2@5767  | 8.25E-11 | 0.002623 |
| 16Mar2011 | 7941  | 434.24  | 13.9946  | 3 _RSNDQTI chr5@6378    | 4.32E-10 | 0.009899 |
| 16Mar2011 | 3152  | 915.47  | 1.201399 | 1 K.FHEIGGQ chrX@4727   | 1.60E-10 | 0.003589 |
| 16Mar2011 | 18785 | 812.11  | 2.033465 | 3 A.EITEMLPi Splice@chr | 4.48E-13 | 0        |
| 16Mar2011 | 6808  | 979.49  | 11.24178 | 1 _NLQNGN chr2@1080     | 1.20E-10 | 0.002887 |
| 16Mar2011 | 13243 | 1075.05 | -16.1169 | 2 R.TCSK+14. chr2@1253  | 7.14E-11 | 0.002518 |
| 16Mar2011 | 22288 | 760.4   | -4.0463  | 3 _TQTNTKI chrX@7978    | 3.34E-10 | 0.008047 |
| 16Mar2011 | 21314 | 1147.24 | 4.705638 | 3 R.FQSAAIG Splice@chr  | 5.34E-14 | 0        |
| 16Mar2011 | 18826 | 1003.19 | 17.13413 | 3 R.CWNRRRA Splice@chr  | 1.06E-11 | 1.33E-04 |
| 16Mar2011 | 21292 | 1147.24 | 4.705638 | 3 R.FQSAAIG Splice@chr  | 9.85E-15 | 0        |
| 16Mar2011 | 20844 | 959.54  | 18.06294 | 2 Y.NNCKLNS chrX@1250   | 6.04E-11 | 0.00245  |
| 16Mar2011 | 4150  | 510.3   | 12.8833  | 2 R.RHVAYVF chr1@1479   | 6.40E-11 | 0.002518 |
| 16Mar2011 | 6509  | 936.48  | 27.86052 | 1 K.LNGGYEC chr2@1191   | 2.25E-11 | 7.55E-04 |
| 16Mar2011 | 15646 | 1056.56 | 28.0642  | 3 I.SRVEDDS Splice@chr  | 6.50E-15 | 0        |
| 16Mar2011 | 15645 | 1005.47 | -16.3827 | 2 K.KVELALW Splice@chr  | 7.32E-23 | 0        |
| 16Mar2011 | 18561 | 902.54  | 17.06109 | 1 R.RCGVIGL chr3@1087   | 2.24E-10 | 0.005534 |
| 16Mar2011 | 3322  | 562.31  | -13.4391 | 2 R.FYLLYLYK Splice@chr | 8.94E-11 | 0.002711 |
| 16Mar2011 | 14683 | 664.7   | 1.197202 | 3 _PTLNK+1 chr1@6526    | 2.92E-10 | 0.007298 |

|           |       |         |          |                         |          |          |
|-----------|-------|---------|----------|-------------------------|----------|----------|
| 16Mar2011 | 12446 | 682.32  | -26.3372 | 2 P.LSSWNVE Splice@chr  | 3.47E-10 | 0.008443 |
| 16Mar2011 | 10933 | 831.39  | -27.5413 | 2 K.KFTFEIEE chrX@1364  | 1.04E-10 | 0.00278  |
| 16Mar2011 | 15105 | 622.33  | 9.587405 | 2 R.AK+14.01 chr2@4270  | 4.18E-10 | 0.009837 |
| 16Mar2011 | 20426 | 791.44  | -2.89613 | 2 R.ERRGHTk chr1@7659   | 4.38E-10 | 0.009899 |
| 16Mar2011 | 12264 | 754.38  | -22.1257 | 3 K.VGTVPDF chr1@3344   | 8.75E-11 | 0.002711 |
| 16Mar2011 | 4332  | 587.34  | 11.13845 | 2 R.ARAIEK+: chr4@5939  | 2.25E-10 | 0.005534 |
| 16Mar2011 | 19858 | 805.46  | -26.0992 | 2 K.TPIFIPAP: chr5@1861 | 7.23E-11 | 0.002518 |
| 16Mar2011 | 485   | 743.48  | 2.794988 | 1 K.KIGGAGII chr1@2883  | 1.73E-10 | 0.004005 |
| 16Mar2011 | 8609  | 1025.61 | -11.6755 | 1 K.LGLGSGL chr5@4945   | 1.58E-11 | 5.09E-04 |
| 16Mar2011 | 15450 | 759.4   | -15.0495 | 2 K.FIDANLQ chr4@8206   | 1.63E-10 | 0.003589 |
| 16Mar2011 | 15335 | 739.39  | -0.08266 | 2 R.VDETLILC gi 3928909 | 1.39E-11 | 3.92E-04 |
| 16Mar2011 | 6154  | 741.38  | -23.1647 | 2 K.FPENRHI: chr2@1477  | 1.86E-10 | 0.004096 |
| 16Mar2011 | 1332  | 748.36  | 16.41564 | 1 R.ATAGDGI chr3@5843   | 3.04E-12 | 1.33E-04 |
| 16Mar2011 | 18507 | 849.42  | 8.560987 | 2 Q.DSSYFVE Splice@chr  | 2.04E-10 | 0.005033 |
| 16Mar2011 | 13043 | 1042.55 | 20.23923 | 1 R.YLELDNFI Splice@chr | 4.24E-11 | 0.001667 |
| 16Mar2011 | 21976 | 1174.61 | -0.72809 | 2 K.INWAVTI chr4@2890   | 1.67E-16 | 0        |
| 16Mar2011 | 1071  | 403.21  | 15.42502 | 2 K.EGGGGG chrX@1217    | 3.66E-11 | 0.001451 |
| 16Mar2011 | 3633  | 498.58  | 26.57833 | 3 R.SQYLQM: Splice@chr  | 3.51E-10 | 0.00864  |
| 16Mar2011 | 3726  | 510.3   | 12.8833  | 2 R.RHVAYVF chr1@1479   | 6.54E-12 | 3.66E-04 |
| 16Mar2011 | 19641 | 1096.89 | 6.757706 | 3 K.DKPFFPSI Splice@chr | 2.11E-10 | 0.007522 |
| 16Mar2011 | 2420  | 452.23  | -1.48793 | 2 R.SGEPLSA: Splice@chr | 2.18E-10 | 0.007522 |
| 16Mar2011 | 19876 | 959.53  | 7.678192 | 2 Y.NNCKLNS chrX@1250   | 1.76E-10 | 0.0066   |
| 16Mar2011 | 2520  | 452.23  | -1.48793 | 2 R.SGEPLSA: Splice@chr | 2.83E-11 | 0.001712 |
| 16Mar2011 | 6534  | 748.39  | -27.6021 | 2 K.QKSNWH chr5@1229    | 1.99E-10 | 0.007144 |
| 16Mar2011 | 20195 | 1147.24 | 4.705638 | 3 R.FQSAAIG Splice@chr  | 8.57E-15 | 0        |
| 16Mar2011 | 3627  | 510.3   | 12.8833  | 2 R.RHVAYVF chr1@1479   | 1.27E-10 | 0.005074 |
| 16Mar2011 | 6587  | 748.39  | -27.6021 | 2 K.QKSNWH chr5@1229    | 8.26E-11 | 0.003655 |
| 16Mar2011 | 12961 | 880.97  | 21.43304 | 2 A.HRK+14.( chr5@1438  | 1.33E-10 | 0.005206 |
| 16Mar2011 | 7655  | 434.24  | 13.9946  | 3 _RSNDQTI chr5@6378    | 2.73E-10 | 0.009012 |
| 16Mar2011 | 17939 | 1003.18 | 7.145987 | 3 R.CWNRRA Splice@chr   | 5.84E-12 | 3.66E-04 |
| 16Mar2011 | 407   | 743.48  | 2.794988 | 1 K.KIGGAGII chr1@2883  | 8.66E-11 | 0.004272 |
| 16Mar2011 | 19450 | 791.44  | -2.89613 | 2 R.ERRGHTk chr1@7659   | 1.11E-10 | 0.004797 |
| 16Mar2011 | 10081 | 440.24  | -24.8035 | 2 K.KNLDVYK Splice@chr  | 2.80E-10 | 0.009012 |
| 16Mar2011 | 18999 | 634.83  | -9.39461 | 2 R.VDIGDILF Splice@chr | 5.39E-12 | 3.66E-04 |
| 16Mar2011 | 15968 | 1048.07 | 19.97594 | 2 E.ADRVND: Splice@chr  | 4.30E-12 | 3.66E-04 |
| 16Mar2011 | 18307 | 593.34  | 22.02044 | 2 R.NSHTLPL chrX@9076   | 2.40E-10 | 0.00793  |
| 16Mar2011 | 19031 | 634.83  | -9.39461 | 2 R.VDIGDILF Splice@chr | 2.84E-12 | 3.66E-04 |
| 16Mar2011 | 2378  | 452.23  | -1.48793 | 2 R.SGEPLSA: Splice@chr | 2.13E-11 | 0.00121  |
| 16Mar2011 | 7645  | 533.82  | 16.26677 | 2 K.TNIYTILTI chr5@1329 | 2.21E-10 | 0.007522 |
| 16Mar2011 | 19541 | 791.44  | -2.89613 | 2 R.ERRGHTk chr1@7659   | 8.71E-11 | 0.004272 |
| 16Mar2011 | 20082 | 1123.08 | -27.1968 | 2 _IPHFDIIP Splice@chr  | 2.32E-10 | 0.007788 |
| 16Mar2011 | 15604 | 888.46  | 11.62323 | 2 K.DITLEVEA Splice@chr | 7.69E-12 | 3.66E-04 |
| 16Mar2011 | 2678  | 452.23  | -1.48793 | 2 R.SGEPLSA: Splice@chr | 2.19E-10 | 0.007522 |
| 16Mar2011 | 19665 | 1097.22 | 2.692596 | 3 K.DKPFFPSI Splice@chr | 1.10E-11 | 3.66E-04 |
| 16Mar2011 | 15127 | 739.39  | -0.08266 | 2 R.VDETLILC gi 3928909 | 2.89E-13 | 0        |
| 16Mar2011 | 3581  | 510.3   | 12.8833  | 2 R.RHVAYVF chr1@1479   | 2.38E-10 | 0.007788 |
| 16Mar2011 | 3777  | 510.3   | 12.8833  | 2 R.RHVAYVF chr1@1479   | 6.40E-11 | 0.002759 |

|           |       |         |          |                         |          |          |
|-----------|-------|---------|----------|-------------------------|----------|----------|
| 16Mar2011 | 11710 | 468.24  | -12.4751 | 2 K.IEDFLGNI chr1@1494  | 2.51E-10 | 0.008336 |
| 16Mar2011 | 2466  | 452.23  | -1.48793 | 2 R.SGEPLSA: Splice@chr | 2.99E-11 | 0.001879 |
| 16Mar2011 | 3675  | 510.3   | 12.8833  | 2 R.RHVAYVF chr1@1479   | 7.70E-11 | 0.0032   |
| 16Mar2011 | 12951 | 1187.91 | -26.8667 | 3 K.NQPIHVF Splice@chr  | 1.05E-10 | 0.004666 |
| 16Mar2011 | 18098 | 622.08  | 13.36542 | 4 R.RFCAPKT chrX@1320   | 1.99E-10 | 0.007144 |
| 16Mar2011 | 20262 | 1047.05 | -7.09169 | 2 L.ESSQKIDL chr4@3516  | 2.09E-10 | 0.007522 |
| 16Mar2011 | 15917 | 1048.06 | 10.52795 | 2 E.ADRVND: Splice@chr  | 3.78E-14 | 0        |
| 16Mar2011 | 13016 | 880.97  | 21.43304 | 2 A.HRK+14.( chr5@1438  | 2.93E-10 | 0.009416 |
| 16Mar2011 | 11661 | 468.25  | 8.948133 | 2 K.IEDFLGNI chr1@1494  | 2.51E-10 | 0.008336 |
| 16Mar2011 | 19698 | 1096.88 | -2.30208 | 3 K.DKPFFPSI Splice@chr | 1.87E-11 | 0.00106  |
| 16Mar2011 | 12893 | 864.44  | -25.9914 | 2 K.LKCSFPM chr5@1599   | 1.63E-10 | 0.006313 |
| 16Mar2011 | 16261 | 978.98  | -9.92308 | 2 R.HYLLNLPI Splice@chr | 7.20E-11 | 0.003055 |
| 16Mar2011 | 6676  | 566.81  | 0.647242 | 2 I.RIPLDYAE chr5@2047  | 5.55E-11 | 0.00246  |
| 16Mar2011 | 2335  | 601.84  | -8.58919 | 2 R.EDVGEK+ Splice@chr  | 2.07E-10 | 0.007274 |
| 16Mar2011 | 2574  | 452.23  | -1.48793 | 2 R.SGEPLSA: Splice@chr | 2.24E-11 | 0.00121  |
| 16Mar2011 | 18224 | 593.34  | 22.02044 | 2 R.NSHTLPL chrX@9076   | 2.91E-10 | 0.009274 |
| 16Mar2011 | 16994 | 913.5   | 5.790241 | 2 F.TEMPLGC chrX@9861   | 1.69E-12 | 3.66E-04 |
| 16Mar2011 | 12695 | 748.72  | -26.0118 | 3 R.LPSKENL chr4@5639   | 1.96E-10 | 0.007144 |
| 16Mar2011 | 15075 | 739.39  | -0.08266 | 2 R.VDETLILC gi 3928909 | 1.19E-12 | 2.28E-04 |
| 16Mar2011 | 2628  | 452.23  | -1.48793 | 2 R.SGEPLSA: Splice@chr | 1.49E-11 | 5.38E-04 |
| 16Mar2011 | 19420 | 791.43  | -15.5678 | 2 R.ERRGHTK chr1@7659   | 2.04E-10 | 0.007274 |
| 16Mar2011 | 17718 | 665.37  | -26.6417 | 2 Q.INNK+14 Splice@chr  | 2.67E-10 | 0.008751 |
| 16Mar2011 | 6446  | 748.39  | -27.6021 | 2 K.QKSNWH chr5@1229    | 3.38E-12 | 0        |
| 16Mar2011 | 1575  | 873.5   | -22.6649 | 1 R.QLGFPIAI chr3@2252  | 2.91E-10 | 0.007294 |
| 16Mar2011 | 14575 | 629     | 0.453558 | 3 L.VFHSFFIL chrX@1261  | 2.07E-10 | 0.005919 |
| 16Mar2011 | 1879  | 560.3   | -21.498  | 2 _PAFDTIGI Splice@chr  | 1.23E-10 | 0.003874 |
| 16Mar2011 | 3877  | 510.3   | 12.8833  | 2 R.RHVAYVF chr1@1479   | 6.40E-11 | 0.001971 |
| 16Mar2011 | 14733 | 833.44  | -14.5174 | 1 _DIGYRIP.I chr4@5827  | 3.24E-10 | 0.007997 |
| 16Mar2011 | 11481 | 468.24  | -12.4751 | 2 K.IEDFLGNI chr1@1494  | 8.84E-11 | 0.003008 |
| 16Mar2011 | 15480 | 1048.07 | 19.97594 | 2 E.ADRVND: Splice@chr  | 3.99E-13 | 0        |
| 16Mar2011 | 18286 | 567.28  | -29.3684 | 3 T.RSSIADS chr1@1057   | 2.17E-10 | 0.006034 |
| 16Mar2011 | 3928  | 510.3   | 12.8833  | 2 R.RHVAYVF chr1@1479   | 2.80E-10 | 0.006817 |
| 16Mar2011 | 7523  | 533.82  | 16.26677 | 2 K.TNIYTILTI chr5@1329 | 2.57E-10 | 0.006471 |
| 16Mar2011 | 19571 | 1147.24 | 4.705638 | 3 R.FQSAAIG Splice@chr  | 3.25E-12 | 0        |
| 16Mar2011 | 18467 | 622.33  | 12.015   | 4 R.RFCAPKT chrX@1320   | 3.19E-10 | 0.007997 |
| 16Mar2011 | 10826 | 1055.51 | -0.43329 | 2 R.QAADGT: Splice@chr  | 7.43E-20 | 0        |
| 16Mar2011 | 3677  | 510.3   | 12.8833  | 2 R.RHVAYVF chr1@1479   | 1.23E-10 | 0.003874 |
| 16Mar2011 | 16483 | 913.49  | -5.18556 | 2 F.TEMPLGC chrX@9861   | 9.18E-11 | 0.003008 |
| 16Mar2011 | 18374 | 634.83  | -9.39461 | 2 R.VDIGDILF Splice@chr | 2.76E-12 | 0        |
| 16Mar2011 | 6775  | 841.98  | -26.9038 | 2 _KLNAK+1 chr1@1427    | 2.81E-10 | 0.006817 |
| 16Mar2011 | 9515  | 400.75  | 5.038673 | 2 K.VEAACAI Splice@chr  | 9.54E-11 | 0.003126 |
| 16Mar2011 | 403   | 743.48  | 2.794988 | 1 K.KIGGAGII chr1@2883  | 2.60E-10 | 0.006471 |
| 16Mar2011 | 19053 | 1096.89 | 6.757706 | 3 K.DKPFFPSI Splice@chr | 1.73E-10 | 0.004958 |
| 16Mar2011 | 12659 | 725.88  | -4.04164 | 2 I.NFLQLYDI Splice@chr | 8.07E-11 | 0.002491 |
| 16Mar2011 | 19832 | 980.16  | -0.83113 | 3 K.EHVGILT chr1@8943   | 9.26E-11 | 0.003126 |
| 16Mar2011 | 4261  | 510.3   | 12.8833  | 2 R.RHVAYVF chr1@1479   | 1.23E-10 | 0.003874 |
| 16Mar2011 | 15996 | 669.35  | -28.2834 | 2 K.LEFNISKI chr1@1931  | 6.65E-12 | 0        |

|           |       |         |          |                         |          |          |
|-----------|-------|---------|----------|-------------------------|----------|----------|
| 16Mar2011 | 3718  | 510.3   | 12.8833  | 2 R.RHVAYVF chr1@1479   | 1.25E-10 | 0.003874 |
| 16Mar2011 | 14937 | 1005.47 | -16.3827 | 2 K.KVELALW Splice@chr  | 5.32E-19 | 0        |
| 16Mar2011 | 15588 | 747.39  | 13.7081  | 2 K.MLRFNEC chr2@8359   | 3.69E-10 | 0.009147 |
| 16Mar2011 | 14450 | 622.33  | 9.587405 | 2 R.AK+14.01 chr2@4270  | 3.66E-10 | 0.008785 |
| 16Mar2011 | 6392  | 748.39  | -27.6021 | 2 K.QKSNWH chr5@1229    | 4.39E-11 | 0.00144  |
| 16Mar2011 | 15431 | 1048.06 | 10.52795 | 2 E.ADRVND Splice@chr   | 2.79E-13 | 0        |
| 16Mar2011 | 5665  | 741.38  | -23.1647 | 2 K.FPENRHI chr2@1477   | 3.36E-10 | 0.008343 |
| 16Mar2011 | 18912 | 791.44  | -2.89613 | 2 R.ERRGHTk chr1@7659   | 3.16E-10 | 0.007997 |
| 16Mar2011 | 15638 | 747.39  | 13.7081  | 2 K.MLRFNEC chr2@8359   | 3.72E-10 | 0.009147 |
| 16Mar2011 | 14585 | 739.39  | -0.08266 | 2 R.VDETLILC gi 3928909 | 1.22E-12 | 0        |
| 16Mar2011 | 3348  | 789.44  | 17.96022 | 1 R.FAAPLDR chr3@8971   | 3.14E-10 | 0.007997 |
| 16Mar2011 | 17734 | 622.08  | 13.36542 | 4 R.RFCAPKT chrX@1320   | 3.53E-10 | 0.008682 |
| 16Mar2011 | 3820  | 510.3   | 12.8833  | 2 R.RHVAYVF chr1@1479   | 1.21E-10 | 0.003874 |
| 16Mar2011 | 18408 | 634.83  | -9.39461 | 2 R.VDIGDILF Splice@chr | 3.04E-13 | 0        |
| 16Mar2011 | 1093  | 502.26  | 17.41275 | 2 R.EENEELLI chr5@1422  | 4.76E-11 | 0.001577 |
| 16Mar2011 | 15007 | 983.97  | 4.629411 | 2 R.SFSTIPDS Splice@chr | 7.22E-12 | 0        |
| 16Mar2011 | 13161 | 801.7   | -6.78619 | 3 K.FFKPNTD chr5@7527   | 2.34E-15 | 0        |
| 16Mar2011 | 4989  | 571.66  | 26.16946 | 3 K.KNSIFQP chr1@2570   | 7.30E-12 | 0        |
| 16Mar2011 | 19026 | 1096.89 | 6.757706 | 3 K.DKPFFPSI Splice@chr | 3.47E-11 | 8.79E-04 |
| 16Mar2011 | 14882 | 1005.47 | -16.3827 | 2 K.KVELALW Splice@chr  | 5.00E-22 | 0        |
| 16Mar2011 | 18369 | 805.97  | -15.8175 | 2 K.TPIFIPAP chr5@1861  | 3.59E-10 | 0.008785 |
| 16Mar2011 | 7516  | 434.24  | 13.9946  | 3 _RSNDQTI chr5@6378    | 3.08E-10 | 0.007897 |
| 16Mar2011 | 4007  | 510.3   | 12.8833  | 2 R.RHVAYVF chr1@1479   | 2.66E-10 | 0.006817 |
| 16Mar2011 | 12444 | 1187.91 | -26.8667 | 3 K.NQPIHVF Splice@chr  | 2.09E-10 | 0.005919 |
| 16Mar2011 | 5051  | 571.66  | 26.16946 | 3 K.KNSIFQP chr1@2570   | 5.88E-11 | 0.001837 |
| 16Mar2011 | 5606  | 741.38  | -23.1647 | 2 K.FPENRHI chr2@1477   | 2.79E-10 | 0.006817 |
| 16Mar2011 | 16431 | 913     | 7.629518 | 2 F.TEMPLGC chrX@9861   | 7.46E-11 | 0.002365 |
| 16Mar2011 | 18800 | 791.44  | -2.89613 | 2 R.ERRGHTk chr1@7659   | 3.40E-10 | 0.008457 |
| 16Mar2011 | 14635 | 739.39  | -0.08266 | 2 R.VDETLILC gi 3928909 | 3.39E-13 | 0        |
| 16Mar2011 | 4846  | 805.42  | -29.245  | 1 K.KMGGMN chr5@9928    | 9.32E-11 | 0.003126 |
| 16Mar2011 | 7345  | 434.24  | 13.9946  | 3 _RSNDQTI chr5@6378    | 3.26E-10 | 0.008117 |
| 16Mar2011 | 3767  | 510.3   | 12.8833  | 2 R.RHVAYVF chr1@1479   | 7.05E-11 | 0.002095 |
| 16Mar2011 | 7046  | 693.86  | -21.1418 | 2 V.ICVAVGD chr5@1063   | 2.03E-10 | 0.005672 |
| 16Mar2011 | 17684 | 622.08  | 13.36542 | 4 R.RFCAPKT chrX@1320   | 3.31E-10 | 0.008228 |
| 16Mar2011 | 18882 | 791.44  | -2.89613 | 2 R.ERRGHTk chr1@7659   | 6.23E-11 | 0.001971 |
| 16Mar2011 | 18503 | 622.08  | 13.36542 | 4 R.RFCAPKT chrX@1320   | 5.63E-12 | 0        |
| 16Mar2011 | 12603 | 725.88  | -4.04164 | 2 I.NFLQLYDI Splice@chr | 3.22E-10 | 0.007997 |
| 16Mar2011 | 4051  | 510.3   | 12.8833  | 2 R.RHVAYVF chr1@1479   | 1.30E-10 | 0.004501 |
| 16Mar2011 | 11354 | 509.8   | -23.773  | 2 R.SSVIMLIV chr2@5767  | 9.83E-11 | 0.003289 |
| 16Mar2011 | 21194 | 791.44  | -2.89613 | 2 R.ERRGHTk chr1@7659   | 2.09E-10 | 0.007453 |
| 16Mar2011 | 14410 | 556.85  | -28.4079 | 2 R.QNKIVLIV Splice@chr | 2.34E-10 | 0.007636 |
| 16Mar2011 | 16058 | 622.33  | 9.587405 | 2 R.AK+14.01 chr2@4270  | 1.26E-10 | 0.004501 |
| 16Mar2011 | 17092 | 1048.06 | 10.52795 | 2 E.ADRVND Splice@chr   | 2.13E-12 | 0        |
| 16Mar2011 | 21095 | 791.44  | -2.89613 | 2 R.ERRGHTk chr1@7659   | 1.77E-10 | 0.006543 |
| 16Mar2011 | 21349 | 1096.89 | 6.757706 | 3 K.DKPFFPSI Splice@chr | 1.27E-11 | 4.60E-04 |
| 16Mar2011 | 9886  | 438.91  | -18.0263 | 3 _KNDKKT chr2@4168     | 2.73E-10 | 0.008537 |
| 16Mar2011 | 7866  | 841.48  | -24.9081 | 2 _KLNK+1 chr1@1427     | 2.02E-10 | 0.007365 |

|           |       |         |          |                         |          |          |
|-----------|-------|---------|----------|-------------------------|----------|----------|
| 16Mar2011 | 2742  | 452.23  | -1.48793 | 2 R.SGEPLSA: Splice@chr | 2.54E-11 | 8.64E-04 |
| 16Mar2011 | 19482 | 1003.18 | 7.145987 | 3 R.CWNRRA Splice@chr   | 1.40E-12 | 0        |
| 16Mar2011 | 7474  | 748.39  | -27.6021 | 2 K.QKSNWH chr5@1229    | 1.08E-11 | 4.60E-04 |
| 16Mar2011 | 4099  | 510.3   | 12.8833  | 2 R.RHVAYVF chr1@1479   | 1.28E-10 | 0.004501 |
| 16Mar2011 | 7923  | 841.48  | -24.9081 | 2 _..KLNAK+1 chr1@1427  | 2.45E-10 | 0.00787  |
| 16Mar2011 | 6404  | 741.38  | -23.1647 | 2 K.FPENRHL chr2@1477   | 1.32E-10 | 0.004623 |
| 16Mar2011 | 2794  | 452.23  | -1.48793 | 2 R.SGEPLSA: Splice@chr | 2.66E-11 | 8.64E-04 |
| 16Mar2011 | 2643  | 452.23  | -1.48793 | 2 R.SGEPLSA: Splice@chr | 2.85E-10 | 0.008985 |
| 16Mar2011 | 17893 | 991.51  | 24.02083 | 3 _..IYVPADD Splice@chr | 4.56E-16 | 0        |
| 16Mar2011 | 7421  | 748.39  | -27.6021 | 2 K.QKSNWH chr5@1229    | 1.08E-10 | 0.003791 |
| 16Mar2011 | 12901 | 468.25  | 8.948133 | 2 K.IEDFLGNI chr1@1494  | 8.84E-11 | 0.003047 |
| 16Mar2011 | 8429  | 434.24  | 13.9946  | 3 _..RSNDQTI chr5@6378  | 7.10E-11 | 0.00243  |
| 16Mar2011 | 20563 | 634.84  | 6.410455 | 2 R.VDIGDILF Splice@chr | 4.01E-12 | 0        |
| 16Mar2011 | 13391 | 748.73  | -12.625  | 3 R.LPSKENL chr4@5639   | 2.57E-10 | 0.008086 |
| 16Mar2011 | 4974  | 536.29  | -10.9462 | 2 _..QVEFNPI Splice@chr | 1.49E-11 | 5.95E-04 |
| 16Mar2011 | 8485  | 434.24  | 13.9946  | 3 _..RSNDQTI chr5@6378  | 3.60E-12 | 0        |
| 16Mar2011 | 11297 | 509.8   | -23.773  | 2 R.SSVIMLIV chr2@5767  | 6.69E-11 | 0.002173 |
| 16Mar2011 | 16111 | 622.33  | 9.587405 | 2 R.AK+14.01 chr2@4270  | 2.43E-10 | 0.007751 |
| 16Mar2011 | 4194  | 510.3   | 12.8833  | 2 R.RHVAYVF chr1@1479   | 6.54E-12 | 1.62E-04 |
| 16Mar2011 | 5656  | 1068.56 | 13.79386 | 1 R.FMRGAA chr1@8018    | 6.48E-11 | 0.002043 |
| 16Mar2011 | 19437 | 1003.19 | 17.13413 | 3 R.CWNRRA Splice@chr   | 3.71E-11 | 9.89E-04 |
| 16Mar2011 | 17946 | 991.51  | 24.02083 | 3 _..IYVPADD Splice@chr | 7.81E-11 | 0.002676 |
| 16Mar2011 | 14086 | 880.97  | 21.43304 | 2 A.HRK+14.1 chr5@1438  | 3.10E-10 | 0.00955  |
| 16Mar2011 | 7916  | 634.88  | -7.6068  | 2 _..YNYKITIL chr2@6867 | 2.35E-10 | 0.007636 |
| 16Mar2011 | 12177 | 1075.05 | -16.1169 | 2 R.TCSK+14. chr2@1253  | 2.14E-10 | 0.007453 |
| 16Mar2011 | 6097  | 439.75  | -7.44254 | 2 K.LYGEVGL chrX@2908   | 3.75E-11 | 9.89E-04 |
| 16Mar2011 | 19687 | 622.08  | 13.36542 | 4 R.RFCAPKT chrX@1320   | 2.15E-10 | 0.007453 |
| 16Mar2011 | 16284 | 739.39  | -0.08266 | 2 R.VDETLILC gi 3928909 | 5.87E-13 | 0        |
| 16Mar2011 | 21316 | 1097.22 | 2.692596 | 3 K.DKPFPSI Splice@chr  | 2.57E-12 | 0        |
| 16Mar2011 | 21393 | 1097.22 | 2.692596 | 3 K.DKPFPSI Splice@chr  | 4.25E-14 | 0        |
| 16Mar2011 | 15840 | 744.39  | 26.99177 | 2 L.FTENLTTI chr5@1256  | 3.03E-10 | 0.009315 |
| 16Mar2011 | 16373 | 1182.56 | -21.0399 | 1 R.RFAENQI chr5@1779   | 2.21E-10 | 0.007553 |
| 16Mar2011 | 9603  | 761.44  | -28.6533 | 2 K.FIEQK+14 chrX@1760  | 1.47E-10 | 0.005605 |
| 16Mar2011 | 4146  | 510.3   | 12.8833  | 2 R.RHVAYVF chr1@1479   | 1.25E-10 | 0.004501 |
| 16Mar2011 | 16809 | 888.46  | 11.62323 | 2 K.DITLEVEA Splice@chr | 2.49E-11 | 8.64E-04 |
| 16Mar2011 | 13926 | 1042.55 | 20.23923 | 1 R.YLELDNFI Splice@chr | 1.35E-11 | 4.60E-04 |
| 16Mar2011 | 17711 | 722.45  | -4.95112 | 2 R.RK+14.01 Splice@chr | 1.59E-10 | 0.005704 |
| 16Mar2011 | 3951  | 510.3   | 12.8833  | 2 R.RHVAYVF chr1@1479   | 1.21E-10 | 0.004401 |
| 16Mar2011 | 8743  | 534.32  | 13.11853 | 2 K.TNIYTILTI chr5@1329 | 1.99E-10 | 0.007245 |
| 16Mar2011 | 14264 | 725.88  | -4.04164 | 2 I.NFLQLYDI Splice@chr | 2.95E-10 | 0.009098 |
| 16Mar2011 | 4001  | 510.3   | 12.8833  | 2 R.RHVAYVF chr1@1479   | 2.55E-10 | 0.008086 |
| 16Mar2011 | 2688  | 452.23  | -1.48793 | 2 R.SGEPLSA: Splice@chr | 1.49E-11 | 5.95E-04 |
| 16Mar2011 | 20520 | 634.84  | 6.410455 | 2 R.VDIGDILF Splice@chr | 2.78E-12 | 0        |
| 16Mar2011 | 13975 | 1042.55 | 20.23923 | 1 R.YLELDNFI Splice@chr | 8.13E-11 | 0.002676 |
| 16Mar2011 | 3230  | 562.31  | -13.4391 | 2 R.FYLLLYLK Splice@chr | 6.77E-11 | 0.002307 |
| 16Mar2011 | 2543  | 446.77  | 19.99118 | 2 R.PVFSITTK chrX@1588  | 2.61E-10 | 0.008191 |
| 16Mar2011 | 10614 | 400.75  | 5.038673 | 2 K.VEA AVAI Splice@chr | 5.26E-11 | 0.001522 |

|           |       |         |          |                         |          |          |
|-----------|-------|---------|----------|-------------------------|----------|----------|
| 16Mar2011 | 11253 | 509.8   | -23.773  | 2 R.SSVIMLIV chr2@5767  | 5.91E-11 | 0.001913 |
| 16Mar2011 | 16850 | 655.34  | 28.21753 | 3 R.RSWAPV chr1@1885    | 3.35E-10 | 0.009242 |
| 16Mar2011 | 15732 | 739.39  | -0.08266 | 2 R.VDETLILC gi 3928905 | 1.52E-12 | 1.56E-04 |
| 16Mar2011 | 21521 | 1147.24 | 4.705638 | 3 R.FQSAAIG Splice@chr  | 8.35E-13 | 0        |
| 16Mar2011 | 11780 | 1075.05 | -16.1169 | 2 R.TCSK+14. chr2@1255  | 1.53E-10 | 0.004301 |
| 16Mar2011 | 6039  | 741.38  | -23.1647 | 2 K.FPENRHL chr2@1477   | 2.46E-10 | 0.006659 |
| 16Mar2011 | 20828 | 1123.58 | -28.8418 | 3 R.RK+14.01 Splice@chr | 2.38E-10 | 0.006441 |
| 16Mar2011 | 16768 | 747.39  | 13.7081  | 2 K.MLRFNEC chr2@8355   | 2.80E-10 | 0.007908 |
| 16Mar2011 | 6510  | 936.48  | 27.86052 | 1 K.LNGGYEC chr2@1191   | 6.10E-11 | 0.002364 |
| 16Mar2011 | 20584 | 791.43  | -15.5678 | 2 R.ERRGHTK chr1@7659   | 1.70E-10 | 0.004624 |
| 16Mar2011 | 13477 | 1187.91 | -26.8667 | 3 K.NQPIHVF Splice@chr  | 3.81E-11 | 0.001539 |
| 16Mar2011 | 8052  | 533.82  | 16.26677 | 2 K.TNIYTILT chr5@1329  | 2.73E-10 | 0.007724 |
| 16Mar2011 | 15105 | 938.46  | 22.50833 | 2 R.ECSQSDS chr2@8876   | 2.10E-10 | 0.005812 |
| 16Mar2011 | 13620 | 725.88  | -4.04164 | 2 I.NFLQLYDI Splice@chr | 9.14E-11 | 0.002901 |
| 16Mar2011 | 15747 | 563.86  | -24.1467 | 2 R.QNK+14. Splice@chr  | 1.63E-10 | 0.004411 |
| 16Mar2011 | 6866  | 748.39  | -27.6021 | 2 K.QKSNWH chr5@1229    | 2.32E-11 | 6.69E-04 |
| 16Mar2011 | 20746 | 1135.55 | 14.23679 | 2 _EWEDWC Splice@chr    | 1.51E-10 | 0.004198 |
| 16Mar2011 | 19453 | 622.34  | 28.13213 | 4 R.RFCAPKT chrX@1320   | 2.59E-10 | 0.007302 |
| 16Mar2011 | 20553 | 791.44  | -2.89613 | 2 R.ERRGHTK chr1@7659   | 3.49E-10 | 0.00944  |
| 16Mar2011 | 4660  | 415.75  | -21.4119 | 2 R.LVITAGTI chr2@1325  | 2.10E-10 | 0.005812 |
| 16Mar2011 | 13426 | 1187.91 | -26.8667 | 3 K.NQPIHVF Splice@chr  | 4.88E-11 | 0.002162 |
| 16Mar2011 | 2542  | 446.77  | 19.99118 | 2 R.PVFSITTK chrX@1588  | 2.86E-10 | 0.007908 |
| 16Mar2011 | 21540 | 1047.06 | 2.482016 | 2 L.ESSQKIDL chr4@3516  | 2.61E-10 | 0.007302 |
| 16Mar2011 | 20028 | 634.84  | 6.410455 | 2 R.VDIGDILF Splice@chr | 3.34E-13 | 0        |
| 16Mar2011 | 12294 | 468.25  | 8.948133 | 2 K.IEDFLGNI chr1@1494  | 2.25E-10 | 0.005898 |
| 16Mar2011 | 749   | 502.26  | 17.41275 | 2 R.EENEELLI chr5@1422  | 4.82E-11 | 0.002037 |
| 16Mar2011 | 19231 | 622.08  | 13.36542 | 4 R.RFCAPKT chrX@1320   | 2.42E-10 | 0.006441 |
| 16Mar2011 | 4073  | 510.3   | 12.8833  | 2 R.RHVAYVF chr1@1479   | 6.54E-12 | 2.89E-04 |
| 16Mar2011 | 6432  | 439.9   | -5.46992 | 3 K.NSQKNPI chr2@3540   | 3.01E-10 | 0.008329 |
| 16Mar2011 | 3916  | 510.3   | 12.8833  | 2 R.RHVAYVF chr1@1479   | 1.28E-10 | 0.003895 |
| 16Mar2011 | 5393  | 575.29  | 19.23719 | 2 R.QPSSSAD chr5@2031   | 3.74E-10 | 0.009821 |
| 16Mar2011 | 19022 | 622.08  | 13.36542 | 4 R.RFCAPKT chrX@1320   | 3.66E-10 | 0.009624 |
| 16Mar2011 | 11671 | 1075.05 | -16.1169 | 2 R.TCSK+14. chr2@1255  | 1.93E-10 | 0.005278 |
| 16Mar2011 | 6211  | 741.38  | -23.1647 | 2 K.FPENRHL chr2@1477   | 3.65E-10 | 0.009624 |
| 16Mar2011 | 3862  | 510.3   | 12.8833  | 2 R.RHVAYVF chr1@1479   | 1.21E-10 | 0.0038   |
| 16Mar2011 | 6154  | 741.38  | -23.1647 | 2 K.FPENRHL chr2@1477   | 1.69E-10 | 0.004624 |
| 16Mar2011 | 7017  | 566.81  | 0.647242 | 2 I.RIPLDYAE chr5@2047  | 7.97E-11 | 0.002701 |
| 16Mar2011 | 15996 | 1005.47 | -16.3827 | 2 K.KVELALW Splice@chr  | 7.23E-23 | 0        |
| 16Mar2011 | 7196  | 841.98  | -26.9038 | 2 _KLNAK+1 chr1@1427    | 8.04E-11 | 0.002807 |
| 16Mar2011 | 13188 | 498.76  | -3.24946 | 2 R.FDELGLFI Splice@chr | 2.42E-10 | 0.006441 |
| 16Mar2011 | 13569 | 725.88  | -4.04164 | 2 I.NFLQLYDI Splice@chr | 2.16E-10 | 0.005898 |
| 16Mar2011 | 17372 | 991.51  | 24.02083 | 3 _IYVPADD Splice@chr   | 2.73E-17 | 0        |
| 16Mar2011 | 3970  | 510.3   | 12.8833  | 2 R.RHVAYVF chr1@1479   | 1.27E-10 | 0.003895 |
| 16Mar2011 | 17990 | 732.07  | 19.51873 | 3 R.ATDDWII Splice@chr  | 1.52E-10 | 0.004301 |
| 16Mar2011 | 19708 | 622.33  | 12.015   | 4 R.RFCAPKT chrX@1320   | 3.42E-10 | 0.009336 |
| 16Mar2011 | 20702 | 1123.58 | -28.8418 | 3 R.RKGRLEIE Splice@chr | 2.81E-10 | 0.007908 |
| 16Mar2011 | 15497 | 622.33  | 9.587405 | 2 R.AK+14.01 chr2@4270  | 2.48E-11 | 6.69E-04 |

|           |       |         |          |                          |          |          |
|-----------|-------|---------|----------|--------------------------|----------|----------|
| 16Mar2011 | 17896 | 921.55  | 15.91309 | 2 S.LLTESLSIF Splice@chr | 3.86E-10 | 0.009911 |
| 16Mar2011 | 10352 | 976.43  | -7.40623 | 3 K.EGEIVLAC Splice@chr  | 2.42E-11 | 6.69E-04 |
| 16Mar2011 | 13736 | 556.85  | -28.4079 | 2 R.QNKIVLIV Splice@chr  | 2.12E-10 | 0.005898 |
| 16Mar2011 | 7143  | 841.48  | -24.9081 | 2 _._KLNAK+1 chr1@1427   | 1.68E-10 | 0.004624 |
| 16Mar2011 | 3533  | 498.58  | 26.57833 | 3 R.SQYLQM Splice@chr    | 2.89E-10 | 0.008014 |
| 16Mar2011 | 11725 | 1075.05 | -16.1169 | 2 R.TCSK+14. chr2@1255   | 3.48E-10 | 0.00944  |
| 16Mar2011 | 17262 | 669.35  | -28.2834 | 2 K.LEFNISKI chr1@1931   | 1.46E-10 | 0.004198 |
| 16Mar2011 | 21500 | 1147.25 | 13.44098 | 3 R.FQSAAIG Splice@chr   | 6.71E-12 | 2.89E-04 |
| 16Mar2011 | 6921  | 748.39  | -27.6021 | 2 K.QKSNWH chr5@1229     | 6.27E-11 | 0.002364 |
| 16Mar2011 | 20065 | 634.83  | -9.39461 | 2 R.VDIGDILF Splice@chr  | 5.66E-13 | 0        |
| 16Mar2011 | 16821 | 747.39  | 13.7081  | 2 K.MLRFNEC chr2@8355    | 3.28E-10 | 0.009242 |
| 16Mar2011 | 17560 | 993.51  | 12.98097 | 3 R.WTESTIL Splice@chr   | 2.50E-10 | 0.006875 |
| 16Mar2011 | 3106  | 915.47  | 1.201399 | 1 K.FHEIGGQ chrX@4727    | 1.34E-10 | 0.004002 |
| 16Mar2011 | 15679 | 739.39  | -0.08266 | 2 R.VDETLILC gi 3928909  | 4.83E-12 | 2.89E-04 |
| 16Mar2011 | 15446 | 622.33  | 9.587405 | 2 R.AK+14.01 chr2@4270   | 2.80E-10 | 0.007908 |
| 16Mar2011 | 20649 | 791.44  | -2.89613 | 2 R.ERRGHTK chr1@7659    | 2.73E-10 | 0.007724 |
| 16Mar2011 | 16589 | 1048.07 | 19.97594 | 2 E.ADRVND Splice@chr    | 2.50E-12 | 1.56E-04 |
| 16Mar2011 | 4719  | 561.34  | 18.80897 | 2 _._TPVNNVL chr1@1057   | 1.22E-10 | 0.0038   |
| 16Mar2011 | 20115 | 634.84  | 6.410455 | 2 R.VDIGDILF Splice@chr  | 9.76E-13 | 0        |
| 16Mar2011 | 20688 | 791.44  | -2.89613 | 2 R.ERRGHTK chr1@7659    | 3.89E-10 | 0.009911 |
| 16Mar2011 | 18954 | 1008.18 | 0.829193 | 3 R.CWNNRRA Splice@chr   | 4.71E-11 | 0.002037 |
| 16Mar2011 | 4021  | 510.3   | 12.8833  | 2 R.RHVAYVF chr1@1479    | 6.40E-11 | 0.002364 |
| 16Mar2011 | 13402 | 1042.55 | 20.23923 | 1 R.YLELDNFI Splice@chr  | 7.80E-11 | 0.002701 |
| 16Mar2011 | 7938  | 434.24  | 13.9946  | 3 _._RSNDQTI chr5@6378   | 2.67E-10 | 0.007615 |
| 16Mar2011 | 13620 | 556.85  | 26.98454 | 2 R.NKEPNLII chr2@8282   | 2.40E-10 | 0.005207 |
| 16Mar2011 | 17786 | 912.99  | -3.34628 | 2 F.TEMPLGC chrX@9861    | 6.78E-13 | 0        |
| 16Mar2011 | 21049 | 1000.5  | -25.5062 | 2 E.CLVVNLS Splice@chr   | 2.54E-10 | 0.005401 |
| 16Mar2011 | 3609  | 510.3   | 12.8833  | 2 R.RHVAYVF chr1@1479    | 1.30E-10 | 0.003441 |
| 16Mar2011 | 3556  | 510.3   | 12.8833  | 2 R.RHVAYVF chr1@1479    | 1.86E-10 | 0.004322 |
| 16Mar2011 | 1333  | 748.36  | 16.41564 | 1 R.ATAGDGI chr3@5845    | 3.04E-12 | 2.64E-04 |
| 16Mar2011 | 20785 | 815.41  | 5.424138 | 3 K.YPNPLHS chr1@3425    | 3.96E-10 | 0.007828 |
| 16Mar2011 | 16203 | 983.96  | -5.49698 | 2 R.SFSTIPDS chr2@1305   | 1.30E-18 | 0        |
| 16Mar2011 | 17733 | 913.49  | -5.18556 | 2 F.TEMPLGC chrX@9861    | 7.09E-13 | 0        |
| 16Mar2011 | 12386 | 754.38  | -22.1257 | 3 K.VGTVPDF chr1@3344    | 3.53E-11 | 7.30E-04 |
| 16Mar2011 | 7727  | 734.43  | 10.70263 | 2 L.TEQSVFK chr5@2036    | 2.15E-10 | 0.004827 |
| 16Mar2011 | 15647 | 739.39  | -0.08266 | 2 R.VDETLILC gi 3928909  | 3.30E-12 | 2.64E-04 |
| 16Mar2011 | 6146  | 742.89  | -5.22625 | 2 V.QMVVMI Splice@chr    | 4.93E-10 | 0.009748 |
| 16Mar2011 | 5017  | 412.56  | -22.1132 | 3 _._NPRGKKC Splice@chr  | 4.47E-10 | 0.008599 |
| 16Mar2011 | 15945 | 1005.47 | -16.3827 | 2 K.KVELALM Splice@chr   | 8.56E-23 | 0        |
| 16Mar2011 | 17690 | 899.46  | -5.23087 | 2 R.SK+14.01 chrX@1700   | 2.74E-10 | 0.006    |
| 16Mar2011 | 21494 | 860.68  | 2.433027 | 4 R.FQSAAIG Splice@chr   | 4.30E-12 | 2.64E-04 |
| 16Mar2011 | 18354 | 812.11  | 2.033465 | 3 A.EITEMLPi chr2@6588   | 1.00E-12 | 1.59E-04 |
| 16Mar2011 | 16225 | 888.46  | 11.62323 | 2 K.DITLEVEA Splice@chr  | 5.70E-13 | 0        |
| 16Mar2011 | 13567 | 556.85  | 26.98454 | 2 R.NKEPNLII chr2@8282   | 2.92E-10 | 0.006089 |
| 16Mar2011 | 19120 | 809.89  | -15.8918 | 2 K.SVSSRITF Splice@chr  | 3.36E-11 | 7.30E-04 |
| 16Mar2011 | 20710 | 791.44  | -2.89613 | 2 R.ERRGHTK chr1@7659    | 9.42E-11 | 0.002959 |
| 16Mar2011 | 19982 | 805.47  | -13.7324 | 2 K.TPIFIPAPi chr5@1861  | 4.89E-10 | 0.009579 |

|           |       |         |          |                         |          |          |
|-----------|-------|---------|----------|-------------------------|----------|----------|
| 16Mar2011 | 15600 | 629     | 0.453558 | 3 L.VFHSFFIL chrX@1261  | 4.21E-10 | 0.00841  |
| 16Mar2011 | 16000 | 1005.47 | -16.3827 | 2 K.KVELALW Splice@chr  | 1.92E-22 | 0        |
| 16Mar2011 | 1371  | 748.36  | 16.41564 | 1 R.ATAGDGI chr3@5845   | 2.01E-11 | 4.94E-04 |
| 16Mar2011 | 7190  | 841.48  | -24.9081 | 2 _KLNAK+1 chr1@1427    | 2.77E-10 | 0.006    |
| 16Mar2011 | 10236 | 1137.64 | -23.9488 | 1 Q.FLVISFA\ chrX@1232  | 2.91E-10 | 0.006089 |
| 16Mar2011 | 19421 | 812.11  | 2.033465 | 3 A.EITEMLPi chr2@6588  | 1.46E-10 | 0.003621 |
| 16Mar2011 | 1413  | 748.36  | 16.41564 | 1 R.ATAGDGI chr3@5845   | 2.91E-10 | 0.006089 |
| 16Mar2011 | 14690 | 1030.51 | 3.115089 | 2 L.SPIPEVPC Splice@chr | 7.82E-18 | 0        |
| 16Mar2011 | 6965  | 748.39  | -27.6021 | 2 K.QKSNWH chr5@1229    | 3.15E-11 | 7.30E-04 |
| 16Mar2011 | 8089  | 534.32  | 13.11853 | 2 K.TNIYTILTI chr5@1329 | 1.93E-10 | 0.004322 |
| 16Mar2011 | 16145 | 983.96  | -5.49698 | 2 R.SFSTIPDS chr2@1305  | 1.91E-19 | 0        |
| 16Mar2011 | 22052 | 1175.11 | -2.15736 | 2 K.INWAVTI chr4@2890   | 5.42E-22 | 0        |
| 16Mar2011 | 20674 | 791.43  | -15.5678 | 2 R.ERRGHTk chr1@7659   | 1.03E-10 | 0.003249 |
| 16Mar2011 | 16061 | 1005.47 | -16.3827 | 2 K.KVELALW Splice@chr  | 4.97E-22 | 0        |
| 16Mar2011 | 18689 | 614.57  | 18.13825 | 4 K.QNSVQG Splice@chr   | 2.54E-10 | 0.005401 |
| 16Mar2011 | 6910  | 748.39  | -27.6021 | 2 K.QKSNWH chr5@1229    | 3.36E-10 | 0.00676  |
| 16Mar2011 | 16303 | 1017.61 | -10.7468 | 1 R.RFLGIIGN chr4@8616  | 1.43E-10 | 0.003621 |
| 16Mar2011 | 12188 | 468.24  | -12.4751 | 2 K.IEDFLGNI chr1@1494  | 2.51E-10 | 0.005309 |
| 16Mar2011 | 18802 | 902.53  | 6.025544 | 1 R.RCGVIGL chr3@1087   | 2.88E-10 | 0.006089 |
| 16Mar2011 | 19992 | 1026.58 | 26.51214 | 1 _FLNIYMP chr1@1151    | 1.12E-10 | 0.003249 |
| 16Mar2011 | 20561 | 791.44  | -2.89613 | 2 R.ERRGHTk chr1@7659   | 7.56E-11 | 0.00243  |
| 16Mar2011 | 6069  | 741.38  | -23.1647 | 2 K.FPENRHI\ chr2@1477  | 2.94E-10 | 0.006179 |
| 16Mar2011 | 2155  | 571.29  | -24.9365 | 2 K.EKYGNFC chr1@1959   | 4.52E-10 | 0.008794 |
| 16Mar2011 | 12636 | 682.32  | -26.3372 | 2 P.LSSWNVf Splice@chr  | 2.46E-10 | 0.005207 |
| 16Mar2011 | 16089 | 983.96  | -5.49698 | 2 R.SFSTIPDS chr2@1305  | 6.17E-17 | 0        |
| 16Mar2011 | 19164 | 809.89  | -15.8918 | 2 K.SVSSRITF Splice@chr | 6.81E-11 | 0.002219 |
| 16Mar2011 | 3507  | 510.3   | 12.8833  | 2 R.RHVAYVF chr1@1479   | 6.54E-12 | 2.64E-04 |
| 16Mar2011 | 6216  | 741.38  | -23.1647 | 2 K.FPENRHI\ chr2@1477  | 3.52E-10 | 0.009869 |
| 16Mar2011 | 13440 | 748.72  | -26.0118 | 3 R.LPSKENL\ chr4@5639  | 1.77E-10 | 0.005822 |
| 16Mar2011 | 6327  | 741.38  | -23.1647 | 2 K.FPENRHI\ chr2@1477  | 2.32E-10 | 0.007533 |
| 16Mar2011 | 10072 | 476.73  | -8.21113 | 2 R.SSHEISHF chr5@1494  | 4.05E-11 | 7.74E-04 |
| 16Mar2011 | 21204 | 791.44  | -2.89613 | 2 R.ERRGHTk chr1@7659   | 2.39E-10 | 0.007756 |
| 16Mar2011 | 3867  | 510.3   | 12.8833  | 2 R.RHVAYVF chr1@1479   | 1.30E-10 | 0.00405  |
| 16Mar2011 | 2843  | 452.23  | -1.48793 | 2 R.SGEPLSA\ Splice@chr | 2.24E-11 | 6.53E-04 |
| 16Mar2011 | 1387  | 748.36  | 16.41564 | 1 R.ATAGDGI chr3@5845   | 3.04E-12 | 3.06E-04 |
| 16Mar2011 | 14289 | 701.35  | 13.82807 | 3 K.NNPYMS Splice@chr   | 1.35E-11 | 5.57E-04 |
| 16Mar2011 | 6479  | 489.28  | 28.87637 | 2 R.RGTASRS chr5@1951   | 2.36E-10 | 0.007533 |
| 16Mar2011 | 2794  | 452.23  | -1.48793 | 2 R.SGEPLSA\ Splice@chr | 1.49E-11 | 5.57E-04 |
| 16Mar2011 | 10918 | 1017.59 | -22.5744 | 1 R.SSVIMLIV chr2@5767  | 1.96E-10 | 0.006242 |
| 16Mar2011 | 2712  | 452.23  | -1.48793 | 2 R.SGEPLSA\ Splice@chr | 4.14E-11 | 7.74E-04 |
| 16Mar2011 | 22082 | 1147.24 | 4.705638 | 3 R.FQSAAG Splice@chr   | 1.38E-16 | 0        |
| 16Mar2011 | 20082 | 812.11  | 2.033465 | 3 A.EITEMLPi Splice@chr | 5.52E-12 | 4.26E-04 |
| 16Mar2011 | 7030  | 748.39  | -27.6021 | 2 K.QKSNWH chr5@1229    | 6.31E-11 | 0.001633 |
| 16Mar2011 | 19133 | 812.11  | 2.033465 | 3 A.EITEMLPi Splice@chr | 1.40E-12 | 0        |
| 16Mar2011 | 20129 | 812.11  | 2.033465 | 3 A.EITEMLPi Splice@chr | 1.07E-11 | 4.26E-04 |
| 16Mar2011 | 16455 | 1004.97 | -14.712  | 2 K.KVELALW Splice@chr  | 4.74E-21 | 0        |
| 16Mar2011 | 3971  | 510.3   | 12.8833  | 2 R.RHVAYVF chr1@1479   | 1.28E-10 | 0.00405  |

|           |       |         |          |                         |          |          |
|-----------|-------|---------|----------|-------------------------|----------|----------|
| 16Mar2011 | 15103 | 1030.51 | 3.115089 | 2 L.SPIEVPC Splice@chr  | 2.57E-17 | 0        |
| 16Mar2011 | 18885 | 731.39  | -3.59333 | 2 R.VDETLILC chr2@8606  | 1.24E-10 | 0.003954 |
| 16Mar2011 | 8097  | 434.24  | 13.9946  | 3 _RSNDQTI chr5@6378    | 3.15E-10 | 0.008929 |
| 16Mar2011 | 18925 | 731.39  | -3.59333 | 2 R.VDETLILC chr2@8606  | 9.62E-13 | 0        |
| 16Mar2011 | 1009  | 515.33  | 11.70274 | 2 _KQKPKFP chr5@2015    | 2.49E-10 | 0.007849 |
| 16Mar2011 | 1430  | 748.36  | 16.41564 | 1 R.ATAGDGI chr3@5845   | 8.48E-11 | 0.002337 |
| 16Mar2011 | 11533 | 663.85  | -5.06443 | 2 N.KMIFSMI chr4@8622   | 2.73E-10 | 0.008247 |
| 16Mar2011 | 14161 | 556.85  | -28.4079 | 2 R.QNKIVLI Splice@chr  | 1.96E-10 | 0.006242 |
| 16Mar2011 | 19020 | 744.71  | -3.82989 | 3 R.MTRVFSI chr3@1715   | 3.18E-11 | 6.53E-04 |
| 16Mar2011 | 13931 | 880.97  | 21.43304 | 2 A.HRK+14.( chr5@1438  | 3.42E-10 | 0.009334 |
| 16Mar2011 | 1708  | 873.5   | -22.6649 | 1 R.QLGFPIAI chr3@2252  | 3.01E-10 | 0.008737 |
| 16Mar2011 | 20721 | 634.83  | -9.39461 | 2 R.VDIGDILF Splice@chr | 5.55E-12 | 4.26E-04 |
| 16Mar2011 | 1313  | 502.26  | 17.41275 | 2 R.EENEELLI chr5@1422  | 1.84E-10 | 0.00591  |
| 16Mar2011 | 16480 | 983.97  | 4.629411 | 2 R.SFSTIPDS chr2@1305  | 5.88E-17 | 0        |
| 16Mar2011 | 1799  | 873.51  | -11.1925 | 1 R.QLGFPIAI chr3@2252  | 3.31E-10 | 0.009234 |
| 16Mar2011 | 3917  | 510.3   | 12.8833  | 2 R.RHVAYVF chr1@1479   | 1.28E-10 | 0.00405  |
| 16Mar2011 | 21723 | 959.03  | 9.429101 | 2 Y.NNCKLNS chrX@1250   | 2.73E-10 | 0.008247 |
| 16Mar2011 | 580   | 743.48  | 2.794988 | 1 K.KIGGAGII chr1@2885  | 2.60E-10 | 0.008051 |
| 16Mar2011 | 20683 | 634.83  | -9.39461 | 2 R.VDIGDILF Splice@chr | 3.35E-12 | 3.06E-04 |
| 16Mar2011 | 2670  | 452.23  | -1.48793 | 2 R.SGEPLSA Splice@chr  | 2.65E-11 | 6.53E-04 |
| 16Mar2011 | 18241 | 913     | 7.629518 | 2 F.TEMPLGC chrX@9861   | 5.74E-12 | 4.26E-04 |
| 16Mar2011 | 3824  | 510.3   | 12.8833  | 2 R.RHVAYVF chr1@1479   | 2.36E-10 | 0.007647 |
| 16Mar2011 | 19778 | 809.89  | -15.8918 | 2 K.SVSSRITF Splice@chr | 1.76E-10 | 0.005822 |
| 16Mar2011 | 20773 | 634.83  | -9.39461 | 2 R.VDIGDILF Splice@chr | 3.83E-12 | 3.06E-04 |
| 16Mar2011 | 21693 | 959.03  | 9.429101 | 2 Y.NNCKLNS chrX@1250   | 1.93E-11 | 6.53E-04 |
| 16Mar2011 | 13119 | 682.32  | -26.3372 | 2 P.LSSWNVF Splice@chr  | 1.20E-10 | 0.003845 |
| 16Mar2011 | 19081 | 812.11  | 2.033465 | 3 A.EITEMLP Splice@chr  | 1.16E-11 | 4.26E-04 |
| 16Mar2011 | 8038  | 434.24  | 13.9946  | 3 _RSNDQTI chr5@6378    | 5.41E-11 | 0.001265 |
| 16Mar2011 | 10957 | 509.3   | -20.473  | 2 R.SSVIMLIV chr2@5767  | 6.56E-11 | 0.001633 |
| 16Mar2011 | 13007 | 754.38  | -22.1257 | 3 K.VGTVPDF chr1@3344   | 8.75E-11 | 0.002337 |
| 16Mar2011 | 16055 | 739.39  | -0.08266 | 2 R.VDETLILC gi 3928909 | 9.36E-13 | 0        |
| 16Mar2011 | 16377 | 670.65  | -15.2277 | 3 K.KVELALW Splice@chr  | 2.37E-17 | 0        |
| 16Mar2011 | 15853 | 622.33  | 9.587405 | 2 R.AK+14.01 chr2@4270  | 2.19E-10 | 0.006993 |
| 16Mar2011 | 18293 | 912.99  | -3.34628 | 2 F.TEMPLGC chrX@9861   | 1.21E-12 | 0        |
| 16Mar2011 | 22669 | 1174.62 | 7.800997 | 2 K.INWAVTI chr4@2890   | 2.33E-20 | 0        |
| 16Mar2011 | 10903 | 509.3   | -20.473  | 2 R.SSVIMLIV chr2@5767  | 1.26E-10 | 0.00405  |
| 16Mar2011 | 15802 | 622.33  | 9.587405 | 2 R.AK+14.01 chr2@4270  | 1.56E-10 | 0.004942 |
| 16Mar2011 | 11014 | 509.3   | -20.473  | 2 R.SSVIMLIV chr2@5767  | 8.95E-11 | 0.002337 |
| 16Mar2011 | 13231 | 748.72  | -26.0118 | 3 R.LPSKENL chr4@5639   | 1.31E-10 | 0.00405  |
| 16Mar2011 | 2894  | 452.23  | -1.48793 | 2 R.SGEPLSA Splice@chr  | 2.24E-11 | 6.53E-04 |
| 16Mar2011 | 4023  | 510.3   | 12.8833  | 2 R.RHVAYVF chr1@1479   | 6.54E-12 | 4.26E-04 |
| 16Mar2011 | 7961  | 533.82  | 16.26677 | 2 K.TNIYTILTI chr5@1329 | 2.63E-10 | 0.005186 |
| 16Mar2011 | 13095 | 1042.55 | 20.23923 | 1 R.YLELDNFI Splice@chr | 2.70E-11 | 2.50E-04 |
| 16Mar2011 | 6329  | 936.48  | 27.86052 | 1 K.LNGGYEC chr2@1191   | 6.91E-11 | 0.001392 |
| 16Mar2011 | 5923  | 741.38  | -23.1647 | 2 K.FPENRHI chr2@1477   | 3.17E-10 | 0.006574 |
| 16Mar2011 | 11509 | 1075.05 | -16.1169 | 2 R.TCSK+14. chr2@1255  | 2.49E-10 | 0.004676 |
| 16Mar2011 | 554   | 419.23  | -7.22396 | 2 R.RSPELVH chr5@4179   | 3.38E-10 | 0.006861 |

|           |       |         |          |                         |          |          |
|-----------|-------|---------|----------|-------------------------|----------|----------|
| 16Mar2011 | 18160 | 731.39  | -3.59333 | 2 R.VDETLILC chr2@8606  | 1.56E-12 | 0        |
| 16Mar2011 | 15407 | 1080.9  | -7.23447 | 3 K.EIVSTDLE Splice@chr | 1.70E-10 | 0.003157 |
| 16Mar2011 | 14591 | 858.48  | 6.006088 | 3 _LETGIHKP Splice@chr  | 8.47E-11 | 0.001492 |
| 16Mar2011 | 16524 | 747.39  | 13.7081  | 2 K.MLRFNEC chr2@8355   | 2.48E-10 | 0.004676 |
| 16Mar2011 | 4114  | 517.33  | 6.214252 | 2 R.KMLRMII Splice@chr  | 5.23E-10 | 0.009996 |
| 16Mar2011 | 7483  | 693.87  | -6.6949  | 2 V.ICVAVGD chr5@1063   | 1.69E-10 | 0.003157 |
| 16Mar2011 | 1320  | 748.36  | 16.41564 | 1 R.ATAGDGI chr3@5843   | 3.04E-12 | 0        |
| 16Mar2011 | 17510 | 913.49  | -5.18556 | 2 F.TEMPLGC chrX@9861   | 5.62E-13 | 0        |
| 16Mar2011 | 7095  | 841.48  | -24.9081 | 2 _KLNAK+1 chr1@1427    | 3.06E-10 | 0.006179 |
| 16Mar2011 | 15472 | 739.39  | -0.08266 | 2 R.VDETLILC gi 3928909 | 9.72E-12 | 1.30E-04 |
| 16Mar2011 | 21194 | 1147.25 | 13.44098 | 3 R.FQSAAIG Splice@chr  | 7.06E-13 | 0        |
| 16Mar2011 | 1587  | 801.46  | -26.9469 | 1 K.WAGVVL chr4@3669    | 9.62E-11 | 0.001703 |
| 16Mar2011 | 18114 | 731.39  | -3.59333 | 2 R.VDETLILC chr2@8606  | 1.63E-11 | 1.30E-04 |
| 16Mar2011 | 21211 | 1147.24 | 4.705638 | 3 R.FQSAAIG Splice@chr  | 2.14E-15 | 0        |
| 16Mar2011 | 18292 | 744.71  | -3.82989 | 3 R.MTRVFSI chr3@1713   | 4.31E-11 | 8.46E-04 |
| 16Mar2011 | 15786 | 1005.47 | -16.3827 | 2 K.KVELALW Splice@chr  | 3.08E-22 | 0        |
| 16Mar2011 | 15734 | 1005.46 | -26.2921 | 2 K.KVELALW Splice@chr  | 6.32E-22 | 0        |
| 16Mar2011 | 5981  | 741.38  | -23.1647 | 2 K.FPENRHI chr2@1477   | 1.21E-10 | 0.002008 |
| 16Mar2011 | 15701 | 789.46  | 4.412467 | 4 K.PFNTLFVI chr4@7467  | 3.81E-10 | 0.007941 |
| 16Mar2011 | 11747 | 873.45  | 11.16623 | 2 S.IM+15.99 Splice@chr | 2.79E-10 | 0.005696 |
| 16Mar2011 | 3670  | 479.26  | -3.85487 | 5 K.M+15.99 chr5@1646   | 5.10E-10 | 0.009902 |
| 16Mar2011 | 5872  | 741.38  | -23.1647 | 2 K.FPENRHI chr2@1477   | 4.06E-10 | 0.008026 |
| 16Mar2011 | 10534 | 509.8   | -23.773  | 2 R.SSVIMLIV chr2@5767  | 6.31E-11 | 0.001288 |
| 16Mar2011 | 3950  | 510.3   | 12.8833  | 2 R.RHVAYVF chr1@1479   | 6.40E-11 | 0.001288 |
| 16Mar2011 | 15929 | 983.47  | 6.336758 | 2 R.SFSTIPDS chr2@1305  | 6.47E-15 | 0        |
| 16Mar2011 | 769   | 515.33  | 11.70274 | 2 _KQKPKFP chr5@2015    | 2.52E-10 | 0.004878 |
| 16Mar2011 | 19817 | 634.84  | 6.410455 | 2 R.VDIGDILF Splice@chr | 2.87E-12 | 0        |
| 16Mar2011 | 19105 | 895.78  | -1.06827 | 3 _RELTEEDI Splice@chr  | 1.05E-12 | 0        |
| 16Mar2011 | 20722 | 1070.59 | -1.91155 | 2 R.RCCRLKV chr3@8327   | 2.28E-10 | 0.004381 |
| 16Mar2011 | 15415 | 739.39  | -0.08266 | 2 R.VDETLILC gi 3928909 | 8.65E-13 | 0        |
| 16Mar2011 | 16303 | 1118.92 | 11.45146 | 3 R.NWKPKT Splice@chr   | 1.43E-10 | 0.002636 |
| 16Mar2011 | 20417 | 791.44  | -2.89613 | 2 R.ERRGHTK chr1@7659   | 1.64E-10 | 0.003157 |
| 16Mar2011 | 6376  | 936.48  | 27.86052 | 1 K.LNGGYEC chr2@1191   | 3.10E-10 | 0.006281 |
| 16Mar2011 | 14390 | 855.41  | -22.1447 | 2 _HVQEVAI Splice@chr   | 3.30E-10 | 0.006861 |
| 16Mar2011 | 15233 | 622.33  | 9.587405 | 2 R.AK+14.01 chr2@4270  | 3.35E-10 | 0.006861 |
| 16Mar2011 | 20350 | 791.44  | -2.89613 | 2 R.ERRGHTK chr1@7659   | 3.18E-10 | 0.006574 |
| 16Mar2011 | 11393 | 1075.05 | -16.1169 | 2 R.TCSK+14. chr2@1253  | 2.85E-10 | 0.005993 |
| 16Mar2011 | 17569 | 913.49  | -5.18556 | 2 F.TEMPLGC chrX@9861   | 2.44E-12 | 0        |
| 16Mar2011 | 18428 | 665.37  | -26.6417 | 2 Q.INNK+14 Splice@chr  | 3.22E-10 | 0.006678 |
| 16Mar2011 | 15990 | 983.96  | -5.49698 | 2 R.SFSTIPDS chr2@1305  | 3.19E-13 | 0        |
| 16Mar2011 | 1286  | 748.36  | 16.41564 | 1 R.ATAGDGI chr3@5843   | 3.04E-12 | 0        |
| 16Mar2011 | 12411 | 754.38  | -22.1257 | 3 K.VGTVPDF chr1@3344   | 1.18E-10 | 0.002008 |
| 16Mar2011 | 4062  | 510.3   | 12.8833  | 2 R.RHVAYVF chr1@1479   | 6.59E-11 | 0.001288 |
| 16Mar2011 | 6805  | 748.39  | -27.6021 | 2 K.QKSNWH chr5@1229    | 3.33E-11 | 3.69E-04 |
| 16Mar2011 | 19858 | 634.83  | -9.39461 | 2 R.VDIGDILF Splice@chr | 4.04E-13 | 0        |
| 16Mar2011 | 20831 | 959.03  | 9.429101 | 2 Y.NNCKLNS chrX@1250   | 2.50E-10 | 0.004779 |
| 16Mar2011 | 6263  | 439.9   | -5.46992 | 3 K.NSQKNPI chr2@3540   | 4.05E-10 | 0.008026 |

|           |       |         |          |                         |          |          |
|-----------|-------|---------|----------|-------------------------|----------|----------|
| 16Mar2011 | 17467 | 913.5   | 5.790241 | 2 F.TEMPLGC chrX@9861   | 6.43E-11 | 0.001288 |
| 16Mar2011 | 15183 | 622.33  | 9.587405 | 2 R.AK+14.01 chr2@4270  | 4.73E-10 | 0.009456 |
| 16Mar2011 | 19902 | 634.84  | 6.410455 | 2 R.VDIGDILF Splice@chr | 8.78E-14 | 0        |
| 16Mar2011 | 11168 | 701.38  | -29.6051 | 2 F.DKNIWNI chr5@6029   | 3.65E-10 | 0.007562 |
| 16Mar2011 | 15587 | 965.76  | 6.091444 | 4 R.KTSSCQK chr5@2089   | 1.82E-10 | 0.003792 |
| 16Mar2011 | 20859 | 959.54  | 18.06294 | 2 Y.NNCKLNS chrX@1250   | 3.84E-10 | 0.007941 |
| 16Mar2011 | 13145 | 1042.55 | 20.23923 | 1 R.YLELDNFI Splice@chr | 5.49E-11 | 0.001071 |
| 16Mar2011 | 3895  | 510.3   | 12.8833  | 2 R.RHVAYVF chr1@1479   | 2.38E-10 | 0.004473 |
| 16Mar2011 | 678   | 437.75  | -8.73436 | 2 K.LQKVGDS chrX@8106   | 4.49E-10 | 0.009082 |
| 16Mar2011 | 6755  | 748.39  | -27.6021 | 2 K.QKSNWH chr5@1229    | 4.19E-11 | 7.27E-04 |
| 16Mar2011 | 14531 | 858.47  | -5.67211 | 3 _LETGIKPI Splice@chr  | 1.79E-14 | 0        |
| 16Mar2011 | 8528  | 1025.61 | -11.6755 | 1 K.LGLGSGL chr5@4949   | 2.60E-11 | 2.50E-04 |
| 16Mar2011 | 18679 | 895.77  | -12.2594 | 3 _RELTEEDI Splice@chr  | 4.57E-11 | 9.53E-04 |
| 16Mar2011 | 4003  | 510.3   | 12.8833  | 2 R.RHVAYVF chr1@1479   | 6.40E-11 | 0.001288 |
| 16Mar2011 | 7487  | 693.87  | -6.6949  | 2 V.ICVAVGD chr5@1063   | 4.08E-11 | 2.29E-04 |
| 16Mar2011 | 16458 | 747.39  | 13.7081  | 2 K.MLRFNEC chr2@8359   | 1.20E-10 | 0.001758 |
| 16Mar2011 | 19807 | 787.88  | 12.22608 | 2 K.FWREIQM chrX@1650   | 2.62E-10 | 0.005192 |
| 16Mar2011 | 5092  | 439.91  | 17.33685 | 3 K.NSQKNPI chr2@3540   | 4.22E-10 | 0.008938 |
| 16Mar2011 | 20386 | 791.44  | -2.89613 | 2 R.ERRGHTK chr1@7659   | 1.31E-10 | 0.002178 |
| 16Mar2011 | 1421  | 748.36  | 16.41564 | 1 R.ATAGDGI chr3@5843   | 3.04E-12 | 0        |
| 16Mar2011 | 10963 | 663.85  | -5.06443 | 2 N.KMIFSMI chr4@8622   | 2.39E-10 | 0.004703 |
| 16Mar2011 | 5943  | 741.38  | -23.1647 | 2 K.FPENRHI chr2@1477   | 3.88E-10 | 0.008386 |
| 16Mar2011 | 19001 | 622.08  | 13.36542 | 4 R.RFCAPKT chrX@1320   | 2.90E-10 | 0.006177 |
| 16Mar2011 | 4191  | 510.3   | 12.8833  | 2 R.RHVAYVF chr1@1479   | 2.65E-10 | 0.005293 |
| 16Mar2011 | 6246  | 439.9   | -5.46992 | 3 K.NSQKNPI chr2@3540   | 8.40E-11 | 7.90E-04 |
| 16Mar2011 | 19798 | 805.97  | -15.8175 | 2 K.TPIFIPAP chr5@1861  | 2.70E-10 | 0.005489 |
| 16Mar2011 | 17655 | 732.07  | 19.51873 | 3 R.ATDDWII Splice@chr  | 1.53E-10 | 0.002798 |
| 16Mar2011 | 14303 | 1134.05 | -14.1995 | 2 _IPSAVGY Splice@chr   | 1.16E-17 | 0        |
| 16Mar2011 | 6778  | 748.39  | -27.6021 | 2 K.QKSNWH chr5@1229    | 2.21E-11 | 1.23E-04 |
| 16Mar2011 | 19696 | 965.03  | -17.4108 | 2 F.FLRQIRQI chr4@3226  | 2.14E-11 | 1.23E-04 |
| 16Mar2011 | 5892  | 741.38  | -23.1647 | 2 K.FPENRHI chr2@1477   | 4.00E-10 | 0.008463 |
| 16Mar2011 | 4028  | 510.3   | 12.8833  | 2 R.RHVAYVF chr1@1479   | 6.54E-12 | 0        |
| 16Mar2011 | 15685 | 1005.46 | -26.2921 | 2 K.KVELALW Splice@chr  | 3.35E-22 | 0        |
| 16Mar2011 | 15176 | 622.33  | 9.587405 | 2 R.AK+14.01 chr2@4270  | 2.40E-10 | 0.004804 |
| 16Mar2011 | 528   | 743.48  | 2.794988 | 1 K.KIGGAGII chr1@2883  | 3.47E-10 | 0.007529 |
| 16Mar2011 | 13590 | 701.36  | 28.23715 | 3 K.NNPYMS Splice@chr   | 4.65E-12 | 0        |
| 16Mar2011 | 15230 | 622.33  | 9.587405 | 2 R.AK+14.01 chr2@4270  | 1.85E-10 | 0.003823 |
| 16Mar2011 | 5962  | 494.59  | -21.6808 | 3 K.FPENRHI chr2@1477   | 1.50E-10 | 0.002694 |
| 16Mar2011 | 6724  | 748.39  | -27.6021 | 2 K.QKSNWH chr5@1229    | 1.05E-11 | 0        |
| 16Mar2011 | 15848 | 1056.56 | 28.0642  | 3 I.SRVEDDS Splice@chr  | 4.82E-14 | 0        |
| 16Mar2011 | 11219 | 1075.05 | -16.1169 | 2 R.TCSK+14. chr2@1253  | 3.62E-10 | 0.007724 |
| 16Mar2011 | 14662 | 858.48  | 6.006088 | 3 _LETGIKPI Splice@chr  | 9.80E-14 | 0        |
| 16Mar2011 | 7770  | 434.24  | 13.9946  | 3 _RSNDQTI chr5@6378    | 5.84E-11 | 2.29E-04 |
| 16Mar2011 | 3874  | 510.3   | 12.8833  | 2 R.RHVAYVF chr1@1479   | 1.98E-10 | 0.004216 |
| 16Mar2011 | 15742 | 1005.47 | -16.3827 | 2 K.KVELALW Splice@chr  | 2.44E-22 | 0        |
| 16Mar2011 | 4137  | 510.3   | 12.8833  | 2 R.RHVAYVF chr1@1479   | 7.70E-11 | 4.53E-04 |
| 16Mar2011 | 3048  | 915.47  | 1.201399 | 1 K.FHEIGGQ chrX@4727   | 1.39E-10 | 0.002595 |

|           |       |         |          |                         |          |          |
|-----------|-------|---------|----------|-------------------------|----------|----------|
| 16Mar2011 | 4080  | 510.3   | 12.8833  | 2 R.RHVAYVF chr1@1479   | 1.25E-10 | 0.002078 |
| 16Mar2011 | 21260 | 860.68  | 2.433027 | 4 R.FQSAAIG Splice@chr  | 1.43E-11 | 0        |
| 16Mar2011 | 14715 | 858.48  | 6.006088 | 3 _LETGIKPI Splice@chr  | 1.63E-12 | 0        |
| 16Mar2011 | 15444 | 739.39  | -0.08266 | 2 R.VDETLILC gi 3928909 | 3.16E-11 | 2.29E-04 |
| 16Mar2011 | 7184  | 841.48  | -24.9081 | 2 _KLNAK+1 chr1@1427    | 3.92E-10 | 0.008463 |
| 16Mar2011 | 13160 | 744.38  | 1.067376 | 2 R.WGDHGF Splice@chr   | 7.00E-11 | 3.42E-04 |
| 16Mar2011 | 11273 | 1075.05 | -16.1169 | 2 R.TCSK+14. chr2@1255  | 3.83E-10 | 0.008386 |
| 16Mar2011 | 9182  | 438.91  | -18.0263 | 3 _KNDKKTN chr2@4168    | 2.10E-10 | 0.004311 |
| 16Mar2011 | 1378  | 748.36  | 16.41564 | 1 R.ATAGDGI chr3@5845   | 3.07E-11 | 2.29E-04 |
| 16Mar2011 | 19046 | 895.78  | -1.06827 | 3 _RELTEEDI Splice@chr  | 1.00E-11 | 0        |
| 16Mar2011 | 4581  | 489.28  | 28.87637 | 2 R.RGTASRS chr5@1951   | 3.51E-11 | 2.29E-04 |
| 16Mar2011 | 7058  | 430.72  | -18.0384 | 2 R.VVDSIDG chr5@6422   | 4.33E-10 | 0.009122 |
| 16Mar2011 | 3107  | 562.31  | -13.4391 | 2 R.FYLLYLYK Splice@chr | 6.76E-11 | 2.29E-04 |
| 16Mar2011 | 16924 | 669.35  | -28.2834 | 2 K.LEFNISKN chr1@1931  | 8.50E-12 | 0        |
| 16Mar2011 | 17403 | 913.5   | 5.790241 | 2 F.TEMPLGC chrX@9861   | 8.65E-12 | 0        |
| 16Mar2011 | 1844  | 873.51  | -11.1925 | 1 R.QLGFPIAI chr3@2252  | 3.04E-10 | 0.006367 |
| 16Mar2011 | 3922  | 510.3   | 12.8833  | 2 R.RHVAYVF chr1@1479   | 1.23E-10 | 0.002078 |
| 16Mar2011 | 18051 | 731.9   | 7.814867 | 2 R.VDETLILC chr2@8606  | 6.53E-12 | 0        |
| 16Mar2011 | 15996 | 1056.56 | 28.0642  | 3 I.SRVEDDSI Splice@chr | 2.47E-13 | 0        |
| 16Mar2011 | 18735 | 1003.18 | 7.145987 | 3 R.CWNRRA Splice@chr   | 9.13E-11 | 0.001116 |
| 16Mar2011 | 12990 | 1042.55 | 20.23923 | 1 R.YLELDNFI Splice@chr | 4.64E-11 | 2.29E-04 |
| 16Mar2011 | 13188 | 1075.05 | -16.1169 | 2 R.TCSK+14. chr2@1255  | 1.30E-10 | 0.002178 |
| 16Mar2011 | 1333  | 748.36  | 16.41564 | 1 R.ATAGDGI chr3@5845   | 3.04E-12 | 0        |
| 16Mar2011 | 3155  | 562.31  | -13.4391 | 2 R.FYLLYLYK Splice@chr | 8.31E-11 | 5.65E-04 |
| 16Mar2011 | 10372 | 921.47  | 18.50062 | 1 R.DLDDTSK chrX@7575   | 1.80E-10 | 0.003517 |
| 16Mar2011 | 20258 | 791.44  | -2.89613 | 2 R.ERRGHTK chr1@7659   | 5.99E-11 | 2.29E-04 |
| 16Mar2011 | 3973  | 510.3   | 12.8833  | 2 R.RHVAYVF chr1@1479   | 1.30E-10 | 0.002178 |
| 16Mar2011 | 18003 | 731.9   | 7.814867 | 2 R.VDETLILC chr2@8606  | 1.46E-11 | 0        |
| 16Mar2011 | 8507  | 1025.61 | -11.6755 | 1 K.LGLGSGL chr5@4945   | 1.83E-11 | 0        |
| 16Mar2011 | 7966  | 533.82  | 16.26677 | 2 K.TNIYTILTI chr5@1329 | 3.33E-10 | 0.007149 |
| 16Mar2011 | 1905  | 417.23  | 13.06342 | 3 K.KGGSSSA chr5@8375   | 2.57E-10 | 0.004986 |
| 16Mar2011 | 17459 | 913.5   | 5.790241 | 2 F.TEMPLGC chrX@9861   | 1.25E-12 | 0        |
| 16Mar2011 | 12537 | 556.86  | -10.3839 | 2 R.QNKIVLI\ Splice@chr | 1.39E-10 | 0.003859 |
| 16Mar2011 | 14487 | 759.4   | -15.0495 | 2 K.FIDANLQ chr4@8206   | 2.37E-10 | 0.006163 |
| 16Mar2011 | 17611 | 649.9   | -9.68814 | 2 K.LKIITNLEI chr2@6716 | 2.64E-10 | 0.006989 |
| 16Mar2011 | 5840  | 936.48  | 27.86052 | 1 K.LNGGYEC chr2@1191   | 4.71E-11 | 0.001395 |
| 16Mar2011 | 17924 | 634.84  | 6.410455 | 2 R.VDIGDILF Splice@chr | 1.14E-12 | 0        |
| 16Mar2011 | 10641 | 1075.05 | -16.1169 | 2 R.TCSK+14. chr2@1255  | 7.46E-11 | 0.002546 |
| 16Mar2011 | 3566  | 510.3   | 12.8833  | 2 R.RHVAYVF chr1@1479   | 1.23E-10 | 0.003611 |
| 16Mar2011 | 19728 | 760.4   | -4.0463  | 3 _TQTNTKI\ chrX@7978   | 2.17E-10 | 0.005821 |
| 16Mar2011 | 6040  | 626.3   | -9.76097 | 2 R.LCESGAA Splice@chr  | 6.49E-16 | 0        |
| 16Mar2011 | 13906 | 780.03  | -24.5321 | 3 ?.AQDNYM Splice@chr   | 2.02E-10 | 0.005602 |
| 16Mar2011 | 12374 | 725.88  | -4.04164 | 2 I.NFLQLYDI Splice@chr | 5.40E-11 | 0.001794 |
| 16Mar2011 | 13399 | 606.67  | -2.35139 | 3 I.NRFNISK chrX@1250   | 5.58E-11 | 0.001794 |
| 16Mar2011 | 13644 | 858.48  | 6.006088 | 3 _LETGIKPI Splice@chr  | 4.78E-12 | 3.14E-04 |
| 16Mar2011 | 5261  | 439.91  | 17.33685 | 3 K.NSQKNPI chr2@3540   | 3.76E-10 | 0.009338 |
| 16Mar2011 | 6309  | 748.39  | -27.6021 | 2 K.QKSNWH chr5@1229    | 5.14E-11 | 0.00153  |

|           |       |         |          |                         |          |          |
|-----------|-------|---------|----------|-------------------------|----------|----------|
| 16Mar2011 | 12482 | 556.86  | -10.3839 | 2 R.QNKIVLIV Splice@chr | 4.22E-11 | 0.001124 |
| 16Mar2011 | 12318 | 726.38  | -6.35569 | 2 I.NFLQLYDI Splice@chr | 2.49E-10 | 0.006631 |
| 16Mar2011 | 17959 | 634.83  | -9.39461 | 2 R.VDIGDILF Splice@chr | 2.85E-12 | 3.14E-04 |
| 16Mar2011 | 19057 | 1147.25 | 13.44098 | 3 R.FQSAAIG Splice@chr  | 2.22E-10 | 0.005944 |
| 16Mar2011 | 14839 | 888.46  | 11.62323 | 2 K.DITLEVEA Splice@chr | 2.99E-10 | 0.008274 |
| 16Mar2011 | 14895 | 888.46  | 11.62323 | 2 K.DITLEVEA Splice@chr | 7.26E-13 | 0        |
| 16Mar2011 | 11192 | 472.29  | -0.64754 | 2 _SPLFVPKf chrX@440    | 1.30E-10 | 0.003611 |
| 16Mar2011 | 12987 | 944.96  | -18.9448 | 2 _ILCSTDVS Splice@chr  | 1.72E-11 | 4.51E-04 |
| 16Mar2011 | 13144 | 887.93  | 29.43791 | 2 I.DEREESTA Splice@chr | 1.22E-10 | 0.003611 |
| 16Mar2011 | 14619 | 789.46  | 4.412467 | 4 K.PFNTLFVI chr4@746   | 1.90E-10 | 0.005266 |
| 16Mar2011 | 3510  | 510.3   | 12.8833  | 2 R.RHVAVVF chr1@147    | 2.40E-10 | 0.006403 |
| 16Mar2011 | 4986  | 439.91  | 17.33685 | 3 K.NSQKNPI chr2@354    | 1.43E-10 | 0.00423  |
| 16Mar2011 | 17876 | 1026.58 | 26.51214 | 1 _FLNIYMP chr1@115     | 7.47E-11 | 0.002546 |
| 16Mar2011 | 6578  | 841.48  | -24.9081 | 2 _KLNAK+1 chr1@142     | 3.00E-10 | 0.008274 |
| 16Mar2011 | 6876  | 693.87  | -6.6949  | 2 V.ICVAVGD chr5@106    | 2.29E-10 | 0.006163 |
| 16Mar2011 | 4621  | 805.43  | -16.7863 | 1 K.KMGGGN chr5@992     | 2.12E-10 | 0.005821 |
| 16Mar2011 | 5992  | 626.3   | -9.76097 | 2 R.LCESGAA Splice@chr  | 7.09E-16 | 0        |
| 16Mar2011 | 5526  | 741.38  | -23.1647 | 2 K.FPENRHI chr2@147    | 2.85E-10 | 0.008039 |
| 16Mar2011 | 19090 | 1147.25 | 13.44098 | 3 R.FQSAAIG Splice@chr  | 3.69E-11 | 9.92E-04 |
| 16Mar2011 | 16813 | 665.37  | -26.6417 | 2 Q.INNK+14 Splice@chr  | 3.94E-10 | 0.009647 |
| 16Mar2011 | 13120 | 813.42  | -11.4945 | 2 _QGKM+1 Splice@chr    | 3.56E-10 | 0.009029 |
| 16Mar2011 | 4570  | 439.91  | 17.33685 | 3 K.NSQKNPI chr2@354    | 1.27E-10 | 0.003611 |
| 16Mar2011 | 9332  | 862.48  | -24.8232 | 1 R.KMRIADk chr4@139    | 3.26E-10 | 0.008929 |
| 16Mar2011 | 12430 | 725.88  | -4.04164 | 2 I.NFLQLYDI Splice@chr | 6.58E-11 | 0.002441 |
| 16Mar2011 | 10962 | 725.88  | -9.68305 | 2 K.ENCRK+1 chr1@119    | 4.05E-10 | 0.009877 |
| 16Mar2011 | 19709 | 760.07  | 1.715387 | 3 _TQTNTKI chrX@797     | 2.58E-10 | 0.00675  |
| 16Mar2011 | 15813 | 902.79  | -26.6077 | 3 K.RKLEYTIS Splice@chr | 3.59E-10 | 0.009029 |
| 16Mar2011 | 2746  | 562.31  | -13.4391 | 2 R.FYLLYLYK Splice@chr | 6.77E-11 | 0.002441 |
| 16Mar2011 | 6254  | 748.39  | -27.6021 | 2 K.QKSNWH chr5@122     | 1.16E-10 | 0.00351  |
| 16Mar2011 | 12937 | 944.95  | -29.5487 | 2 _ILCSTDVS Splice@chr  | 9.10E-11 | 0.002784 |
| 16Mar2011 | 19071 | 1147.24 | 4.705638 | 3 R.FQSAAIG Splice@chr  | 2.85E-14 | 0        |
| 16Mar2011 | 13855 | 780.03  | -24.5321 | 3 ?_AQDNYM Splice@chr   | 4.15E-11 | 0.001124 |
| 16Mar2011 | 2802  | 562.31  | -13.4391 | 2 R.FYLLYLYK Splice@chr | 7.37E-11 | 0.002546 |
| 16Mar2011 | 17567 | 634.84  | 6.410455 | 2 R.VDIGDILF Splice@chr | 7.62E-13 | 0        |
| 16Mar2011 | 6388  | 430.72  | -18.0384 | 2 R.VVDSIDG chr5@642    | 2.72E-10 | 0.006968 |
| 16Mar2011 | 274   | 743.48  | 2.794988 | 1 K.KIGGAGII chr1@288   | 1.73E-10 | 0.004537 |
| 16Mar2011 | 6152  | 748.39  | -27.6021 | 2 K.QKSNWH chr5@122     | 2.89E-11 | 4.54E-04 |
| 16Mar2011 | 15155 | 722.45  | -4.95112 | 2 R.RK+14.01 Splice@chr | 2.07E-10 | 0.005514 |
| 16Mar2011 | 5829  | 489.28  | 28.87637 | 2 R.RGTASRS chr5@195    | 1.27E-10 | 0.003423 |
| 16Mar2011 | 5517  | 741.38  | -23.1647 | 2 K.FPENRHI chr2@147    | 1.03E-10 | 0.002789 |
| 16Mar2011 | 14396 | 888.46  | 11.62323 | 2 K.DITLEVEA Splice@chr | 6.89E-12 | 1.57E-04 |
| 16Mar2011 | 17943 | 791.44  | -2.89613 | 2 R.ERRGHTk chr1@765    | 2.81E-10 | 0.007066 |
| 16Mar2011 | 11662 | 606.34  | -12.1581 | 2 C.AK+14.01 chr2@290   | 3.23E-10 | 0.007637 |
| 16Mar2011 | 12035 | 725.88  | -4.04164 | 2 I.NFLQLYDI Splice@chr | 4.19E-11 | 5.93E-04 |
| 16Mar2011 | 16157 | 731.39  | -3.59333 | 2 R.VDETLILC gi 392890  | 2.66E-10 | 0.006845 |
| 16Mar2011 | 10338 | 1075.05 | -16.1169 | 2 R.TCSK+14. chr2@125   | 4.54E-10 | 0.009572 |
| 16Mar2011 | 10329 | 717.04  | 7.989016 | 3 K.YKINTDEI chr2@556   | 3.06E-10 | 0.007408 |

|           |       |         |          |                         |          |          |
|-----------|-------|---------|----------|-------------------------|----------|----------|
| 16Mar2011 | 7312  | 696.37  | -15.3603 | 2 _LPTSPIGD chr5@1204   | 3.71E-10 | 0.008304 |
| 16Mar2011 | 2795  | 562.31  | -13.4391 | 2 R.FYLLYLYK Splice@chr | 5.07E-11 | 7.30E-04 |
| 16Mar2011 | 13953 | 739.39  | -0.08266 | 2 R.VDETLILC gi 3928909 | 5.43E-12 | 0        |
| 16Mar2011 | 15274 | 669.35  | -28.2834 | 2 K.LEFNISK chr1@1931   | 2.91E-11 | 4.54E-04 |
| 16Mar2011 | 11759 | 1042.55 | 20.23923 | 1 R.YLELDNFI Splice@chr | 7.65E-11 | 0.001709 |
| 16Mar2011 | 3555  | 510.3   | 12.8833  | 2 R.RHVAYVF chr1@1479   | 6.40E-11 | 0.001011 |
| 16Mar2011 | 13738 | 622.33  | 9.587405 | 2 R.AK+14.01 chr2@4270  | 2.50E-10 | 0.006239 |
| 16Mar2011 | 6040  | 841.48  | -24.9081 | 2 _KLNAK+1 chr1@1427    | 2.95E-10 | 0.007163 |
| 16Mar2011 | 1315  | 801.46  | -26.9469 | 1 K.WAGVVL chr4@3669    | 7.32E-11 | 0.001709 |
| 16Mar2011 | 12570 | 600.38  | -17.1075 | 2 R.KTGVLAL chr1@1370   | 3.62E-10 | 0.008072 |
| 16Mar2011 | 5906  | 626.3   | -9.76097 | 2 R.LCESGAA Splice@chr  | 5.20E-16 | 0        |
| 16Mar2011 | 7016  | 434.24  | 13.9946  | 3 _RSNDQTI chr5@6378    | 2.99E-10 | 0.007163 |
| 16Mar2011 | 5716  | 439.91  | 17.33685 | 3 K.NSQKNPI chr2@3540   | 3.45E-10 | 0.007848 |
| 16Mar2011 | 19323 | 760.4   | -4.0463  | 3 _TQTNTKI chrX@7978    | 4.35E-10 | 0.00947  |
| 16Mar2011 | 16436 | 665.37  | -26.6417 | 2 Q.INNK+14 Splice@chr  | 2.71E-10 | 0.006968 |
| 16Mar2011 | 15567 | 824.43  | -7.63469 | 2 K.YFVNFSN chr2@2115   | 4.26E-10 | 0.00947  |
| 16Mar2011 | 19340 | 760.4   | -4.0463  | 3 _TQTNTKI chrX@7978    | 1.86E-10 | 0.004787 |
| 16Mar2011 | 5304  | 741.38  | -23.1647 | 2 K.FPENRHI chr2@1477   | 2.03E-10 | 0.005288 |
| 16Mar2011 | 2250  | 446.77  | 19.99118 | 2 R.PVFSITTK chrX@1588  | 2.88E-10 | 0.007066 |
| 16Mar2011 | 12168 | 556.86  | -10.3839 | 2 R.QNKIVLI Splice@chr  | 3.79E-10 | 0.008548 |
| 16Mar2011 | 17536 | 634.84  | 6.410455 | 2 R.VDIGDILF Splice@chr | 2.56E-12 | 0        |
| 16Mar2011 | 7404  | 533.82  | 16.26677 | 2 K.TNIYTILTI chr5@1329 | 3.89E-10 | 0.00866  |
| 16Mar2011 | 6337  | 430.72  | -18.0384 | 2 R.VVDSIDG chr5@6422   | 4.35E-10 | 0.00947  |
| 16Mar2011 | 6103  | 748.39  | -27.6021 | 2 K.QKSNWH chr5@1229    | 6.74E-11 | 0.001443 |
| 16Mar2011 | 7190  | 533.82  | 16.26677 | 2 K.TNIYTILTI chr5@1329 | 1.39E-10 | 0.003536 |
| 16Mar2011 | 11687 | 881.92  | -2.80647 | 2 F.LQEQGTY Splice@chr  | 1.36E-10 | 0.003536 |
| 16Mar2011 | 15099 | 722.45  | -4.95112 | 2 R.RK+14.01 Splice@chr | 3.09E-10 | 0.007408 |
| 16Mar2011 | 13795 | 622.33  | 9.587405 | 2 R.AK+14.01 chr2@4270  | 9.63E-11 | 0.002663 |
| 16Mar2011 | 16894 | 622.33  | 12.015   | 4 R.RFCAPKT chrX@1320   | 8.37E-11 | 0.001831 |
| 16Mar2011 | 13334 | 664.7   | 1.197202 | 3 _PTLNK+1 chr1@6526    | 6.20E-11 | 8.72E-04 |
| 16Mar2011 | 5460  | 741.38  | -23.1647 | 2 K.FPENRHI chr2@1477   | 4.27E-10 | 0.00947  |
| 16Mar2011 | 15922 | 693.32  | -11.549  | 2 R.SSSMDYL Splice@chr  | 3.85E-10 | 0.00866  |
| 16Mar2011 | 414   | 437.75  | -8.73436 | 2 K.LQKVGDS chrX@8106   | 4.00E-10 | 0.00877  |
| 16Mar2011 | 6524  | 841.48  | -24.9081 | 2 _KLNAK+1 chr1@1427    | 2.54E-10 | 0.006483 |
| 16Mar2011 | 15333 | 991.51  | 24.02083 | 3 _IYVPADD Splice@chr   | 8.49E-14 | 0        |
| 16Mar2011 | 12093 | 725.88  | -4.04164 | 2 I.NFLQLYDI Splice@chr | 3.66E-10 | 0.008072 |
| 16Mar2011 | 6792  | 693.87  | -6.6949  | 2 V.ICVAVGD chr5@1065   | 1.44E-10 | 0.003536 |
| 16Mar2011 | 10103 | 897.42  | -27.6753 | 3 _QVREMH Splice@chr    | 4.45E-10 | 0.009572 |
| 16Mar2011 | 5958  | 626.3   | -9.76097 | 2 R.LCESGAA Splice@chr  | 1.60E-16 | 0        |
| 16Mar2011 | 11004 | 661.4   | -2.4954  | 2 K.LVLIAVN chr1@6528   | 2.04E-10 | 0.005288 |
| 16Mar2011 | 3502  | 510.3   | 12.8833  | 2 R.RHVAYVF chr1@1479   | 1.25E-10 | 0.003423 |
| 16Mar2011 | 6468  | 841.48  | -24.9081 | 2 _KLNAK+1 chr1@1427    | 2.50E-10 | 0.006239 |
| 16Mar2011 | 11979 | 725.88  | -4.04164 | 2 I.NFLQLYDI Splice@chr | 2.58E-10 | 0.006594 |
| 16Mar2011 | 3445  | 510.3   | 12.8833  | 2 R.RHVAYVF chr1@1479   | 1.49E-10 | 0.003798 |
| 16Mar2011 | 5708  | 936.48  | 27.86052 | 1 K.LNGGYEC chr2@1191   | 4.39E-11 | 5.93E-04 |
| 16Mar2011 | 13491 | 780.03  | -24.5321 | 3 ?_AQDNYM Splice@chr   | 4.85E-10 | 0.009918 |
| 16Mar2011 | 17585 | 805.47  | -13.7324 | 2 K.TPIFIPAP chr5@1861  | 3.06E-10 | 0.007288 |

|           |       |         |          |                         |          |          |
|-----------|-------|---------|----------|-------------------------|----------|----------|
| 16Mar2011 | 13373 | 725.88  | -4.04164 | 2 I.NFLQLYDI Splice@chr | 3.13E-10 | 0.007201 |
| 16Mar2011 | 13072 | 1042.55 | 20.23923 | 1 R.YLELDNFI Splice@chr | 5.45E-11 | 0.002057 |
| 16Mar2011 | 16410 | 747.39  | 13.7081  | 2 K.MLRFNEC chr2@835    | 2.37E-10 | 0.005588 |
| 16Mar2011 | 10048 | 827.45  | 15.14008 | 1 R.SAHISAN chr4@558    | 7.60E-11 | 0.002394 |
| 16Mar2011 | 14194 | 1120.58 | -23.7686 | 2 T.RFNFNNTI\ chr2@131  | 2.56E-10 | 0.005788 |
| 16Mar2011 | 6136  | 494.59  | -21.6808 | 3 K.FPENRHI\ chr2@147   | 1.85E-10 | 0.004849 |
| 16Mar2011 | 13869 | 801.7   | -6.78619 | 3 K.FFKPNTD chr5@752    | 9.58E-17 | 0        |
| 16Mar2011 | 14776 | 938.46  | 22.50833 | 2 R.ECSQSDS chr2@887    | 3.45E-10 | 0.008302 |
| 16Mar2011 | 13817 | 801.7   | -6.78619 | 3 K.FFKPNTD chr5@752    | 6.28E-15 | 0        |
| 16Mar2011 | 7041  | 841.48  | -24.9081 | 2 _KLNK+1 chr1@142      | 3.22E-10 | 0.007302 |
| 16Mar2011 | 15162 | 622.33  | 9.587405 | 2 R.AK+14.01 chr2@427   | 1.48E-10 | 0.004191 |
| 16Mar2011 | 5224  | 805.42  | -29.245  | 1 K.KMGGGN chr5@992     | 3.09E-11 | 8.00E-04 |
| 16Mar2011 | 17874 | 731.4   | 10.11146 | 2 R.VDETLILC chr2@860   | 1.29E-12 | 0        |
| 16Mar2011 | 19395 | 634.83  | -9.39461 | 2 R.VDIGDILF Splice@chr | 1.05E-12 | 0        |
| 16Mar2011 | 3761  | 510.3   | 12.8833  | 2 R.RHVAYVF chr1@147    | 6.54E-12 | 2.92E-04 |
| 16Mar2011 | 10362 | 976.44  | 2.859196 | 3 K.EGEIVLAC Splice@chr | 4.02E-10 | 0.00935  |
| 16Mar2011 | 3647  | 510.3   | 12.8833  | 2 R.RHVAYVF chr1@147    | 1.31E-10 | 0.003751 |
| 16Mar2011 | 6933  | 748.39  | -27.6021 | 2 K.QKSNWH chr5@122     | 8.92E-11 | 0.00285  |
| 16Mar2011 | 15450 | 739.39  | -0.08266 | 2 R.VDETLILC gi 392890  | 3.51E-12 | 1.55E-04 |
| 16Mar2011 | 2540  | 446.77  | 19.99118 | 2 R.PVFSITTK chrX@158   | 2.86E-10 | 0.006895 |
| 16Mar2011 | 7062  | 430.72  | -18.0384 | 2 R.VVDSIDG chr5@642    | 8.00E-11 | 0.002504 |
| 16Mar2011 | 19916 | 791.44  | -2.89613 | 2 R.ERRGHTK chr1@765    | 1.82E-10 | 0.004849 |
| 16Mar2011 | 13261 | 725.88  | -4.04164 | 2 I.NFLQLYDI Splice@chr | 4.31E-11 | 0.001307 |
| 16Mar2011 | 11546 | 1075.05 | -16.1169 | 2 R.TCSK+14. chr2@125   | 3.07E-10 | 0.007201 |
| 16Mar2011 | 12913 | 498.76  | -3.24946 | 2 R.FDELGLFI Splice@chr | 1.82E-10 | 0.004849 |
| 16Mar2011 | 3700  | 510.3   | 12.8833  | 2 R.RHVAYVF chr1@147    | 1.21E-10 | 0.00365  |
| 16Mar2011 | 19883 | 791.44  | -2.89613 | 2 R.ERRGHTK chr1@765    | 2.66E-11 | 6.73E-04 |
| 16Mar2011 | 13927 | 801.7   | -6.78619 | 3 K.FFKPNTD chr5@752    | 4.78E-15 | 0        |
| 16Mar2011 | 6873  | 748.39  | -27.6021 | 2 K.QKSNWH chr5@122     | 6.45E-12 | 2.92E-04 |
| 16Mar2011 | 10517 | 440.24  | -24.8035 | 2 K.KNLDVYK Splice@chr  | 2.51E-10 | 0.005788 |
| 16Mar2011 | 19475 | 634.83  | -9.39461 | 2 R.VDIGDILF Splice@chr | 4.65E-12 | 1.55E-04 |
| 16Mar2011 | 17354 | 912.99  | -3.34628 | 2 F.TEMPLGC chrX@986    | 5.39E-11 | 0.002057 |
| 16Mar2011 | 14721 | 806.37  | -9.17294 | 3 K.FFKPNTD chr5@752    | 8.02E-17 | 0        |
| 16Mar2011 | 10831 | 976.43  | -7.40623 | 3 K.EGEIVLAC Splice@chr | 3.01E-10 | 0.007201 |
| 16Mar2011 | 6040  | 741.38  | -23.1647 | 2 K.FPENRHI\ chr2@147   | 3.94E-10 | 0.009143 |
| 16Mar2011 | 19432 | 634.83  | -9.39461 | 2 R.VDIGDILF Splice@chr | 5.97E-13 | 0        |
| 16Mar2011 | 6147  | 741.38  | -23.1647 | 2 K.FPENRHI\ chr2@147   | 4.10E-10 | 0.00935  |
| 16Mar2011 | 19975 | 791.43  | -15.5678 | 2 R.ERRGHTK chr1@765    | 3.37E-10 | 0.007744 |
| 16Mar2011 | 20801 | 1047.06 | 2.482016 | 2 L.ESSQKIDL chr4@351   | 1.57E-10 | 0.004409 |
| 16Mar2011 | 5141  | 412.56  | -22.1132 | 3 _NPRGKKC Splice@chr   | 2.44E-10 | 0.005788 |
| 16Mar2011 | 21690 | 812.47  | 15.81787 | 1 R.RATNPPF chr2@412    | 3.65E-10 | 0.008618 |
| 16Mar2011 | 8029  | 533.82  | 16.26677 | 2 K.TNIYTILT chr5@132   | 1.98E-10 | 0.005064 |
| 16Mar2011 | 15908 | 888.46  | 11.62323 | 2 K.DITLEVEA Splice@chr | 2.75E-12 | 1.55E-04 |
| 16Mar2011 | 10626 | 509.3   | -20.473  | 2 R.SSVIMLIV chr2@576   | 2.06E-10 | 0.005147 |
| 16Mar2011 | 3601  | 510.3   | 12.8833  | 2 R.RHVAYVF chr1@147    | 1.21E-10 | 0.00365  |
| 16Mar2011 | 13313 | 725.88  | -4.04164 | 2 I.NFLQLYDI Splice@chr | 1.68E-11 | 4.22E-04 |
| 16Mar2011 | 14667 | 806.38  | 3.362099 | 3 K.FFKPNTD chr5@752    | 2.44E-15 | 0        |

|           |       |         |          |                         |          |          |
|-----------|-------|---------|----------|-------------------------|----------|----------|
| 16Mar2011 | 15965 | 888.46  | 11.62323 | 2 K.DITLEVEA Splice@chr | 6.90E-12 | 2.92E-04 |
| 16Mar2011 | 11447 | 1055.51 | -0.43329 | 2 R.QAADGTi Splice@chr  | 7.15E-15 | 0        |
| 16Mar2011 | 7791  | 908.47  | 22.76165 | 1 R.DGRMTV chr2@5006    | 1.65E-10 | 0.004409 |
| 16Mar2011 | 12957 | 881.92  | -2.80647 | 2 F.LQEQGTy Splice@chr  | 1.30E-11 | 4.22E-04 |
| 16Mar2011 | 20004 | 791.43  | -15.5678 | 2 R.ERRGHTk chr1@7659   | 7.55E-11 | 0.002271 |
| 16Mar2011 | 17303 | 913     | 7.629518 | 2 F.TEMPLGC chrX@9861   | 1.82E-11 | 5.57E-04 |
| 16Mar2011 | 14649 | 762.42  | 3.25006  | 2 _MK+14.0 chr4@7749    | 4.67E-11 | 0.001692 |
| 16Mar2011 | 12289 | 881.92  | -2.80647 | 2 F.LQEQGTy Splice@chr  | 2.20E-10 | 0.004713 |
| 16Mar2011 | 10880 | 596.68  | -18.3066 | 3 K.YVVILNGi chrX@1642  | 2.45E-10 | 0.005432 |
| 16Mar2011 | 2266  | 446.77  | 19.99118 | 2 R.PVFSITTK chrX@1588  | 1.90E-10 | 0.004003 |
| 16Mar2011 | 8258  | 599.62  | 1.63138  | 3 R.NAEAAAt Splice@chr  | 1.93E-10 | 0.004255 |
| 16Mar2011 | 3548  | 510.3   | 12.8833  | 2 R.RHVAYVF chr1@1479   | 2.76E-10 | 0.006364 |
| 16Mar2011 | 6549  | 841.48  | -24.9081 | 2 _KLNAK+1 chr1@1427    | 1.52E-10 | 0.003265 |
| 16Mar2011 | 18302 | 634.83  | -9.39461 | 2 R.VDIGDILF Splice@chr | 3.97E-13 | 0        |
| 16Mar2011 | 18246 | 805.97  | -15.8175 | 2 K.TPIFIPAPi chr5@1861 | 2.23E-10 | 0.004713 |
| 16Mar2011 | 10817 | 1075.05 | -16.1169 | 2 R.TCSK+14. chr2@1253  | 1.88E-10 | 0.004003 |
| 16Mar2011 | 14588 | 739.39  | -0.08266 | 2 R.VDETLILC gi 3928909 | 1.27E-12 | 0        |
| 16Mar2011 | 6268  | 748.39  | -27.6021 | 2 K.QKSNWH chr5@1229    | 3.70E-11 | 0.001167 |
| 16Mar2011 | 18260 | 634.84  | 6.410455 | 2 R.VDIGDILF Splice@chr | 7.85E-13 | 0        |
| 16Mar2011 | 5385  | 703.37  | -12.3904 | 2 K.WPNPKC chr3@1267    | 6.36E-11 | 0.001535 |
| 16Mar2011 | 2149  | 600.34  | -18.2932 | 2 K.EKK+14.0 Splice@chr | 1.58E-10 | 0.003265 |
| 16Mar2011 | 9855  | 921.47  | 18.50062 | 1 R.DLDDTSK chrX@7573   | 1.43E-10 | 0.003026 |
| 16Mar2011 | 12570 | 725.88  | -4.04164 | 2 I.NFLQLYDI Splice@chr | 4.83E-11 | 0.001535 |
| 16Mar2011 | 12750 | 556.85  | -28.4079 | 2 R.QNKIVLIi Splice@chr | 3.80E-10 | 0.009432 |
| 16Mar2011 | 13991 | 938.46  | 22.50833 | 2 R.ECSQSDS chr2@8876   | 1.42E-10 | 0.003026 |
| 16Mar2011 | 3653  | 510.3   | 12.8833  | 2 R.RHVAYVF chr1@1479   | 6.40E-11 | 0.001535 |
| 16Mar2011 | 13643 | 607     | -9.70672 | 3 I.NRFNISK chrX@1250   | 2.03E-10 | 0.004615 |
| 16Mar2011 | 13143 | 801.7   | -6.78619 | 3 K.FFKPNTD chr5@7527   | 2.60E-16 | 0        |
| 16Mar2011 | 16948 | 665.37  | -26.6417 | 2 Q.INNK+14 Splice@chr  | 3.86E-10 | 0.009664 |
| 16Mar2011 | 17895 | 1129.1  | -7.98299 | 2 S.PPK+14.0 chrX@7427  | 3.50E-10 | 0.008263 |
| 16Mar2011 | 10872 | 1075.05 | -16.1169 | 2 R.TCSK+14. chr2@1253  | 3.18E-10 | 0.007187 |
| 16Mar2011 | 12520 | 725.88  | -4.04164 | 2 I.NFLQLYDI Splice@chr | 1.76E-10 | 0.003882 |
| 16Mar2011 | 5863  | 936.48  | 27.86052 | 1 K.LNGGYEC chr2@1191   | 1.75E-11 | 3.06E-04 |
| 16Mar2011 | 17320 | 1003.18 | 7.145987 | 3 R.CWNRRA Splice@chr   | 4.31E-11 | 0.001535 |
| 16Mar2011 | 18722 | 791.44  | -2.89613 | 2 R.ERRGHTk chr1@7659   | 3.28E-10 | 0.007429 |
| 16Mar2011 | 9335  | 827.45  | 15.14008 | 1 R.SAHISAN chr4@5582   | 1.61E-10 | 0.003392 |
| 16Mar2011 | 3174  | 498.58  | 26.57833 | 3 R.SQYLQM Splice@chr   | 2.15E-10 | 0.004713 |
| 16Mar2011 | 12389 | 1042.55 | 20.23923 | 1 R.YLELDNFi Splice@chr | 6.54E-11 | 0.001535 |
| 16Mar2011 | 19154 | 959.54  | 18.06294 | 2 Y.NNCKLNS chrX@1250   | 1.40E-10 | 0.003026 |
| 16Mar2011 | 2919  | 695.35  | -9.5814  | 2 R.SSAEK+1i chr3@3299  | 8.25E-11 | 0.001771 |
| 16Mar2011 | 1257  | 801.46  | -26.9469 | 1 K.WAGVVL chr4@3669    | 1.05E-10 | 0.002302 |
| 16Mar2011 | 20535 | 508.27  | -0.64172 | 3 K.VEFMKH! chr5@1476   | 2.71E-10 | 0.006153 |
| 16Mar2011 | 6497  | 566.81  | 0.647242 | 2 I.RIPLDYAE chr5@2047  | 2.40E-10 | 0.005432 |
| 16Mar2011 | 5556  | 741.38  | -23.1647 | 2 K.FPENRHli chr2@1477  | 1.81E-10 | 0.003882 |
| 16Mar2011 | 16244 | 912.99  | -3.34628 | 2 F.TEMPLGC chrX@9861   | 4.57E-12 | 1.55E-04 |
| 16Mar2011 | 14529 | 739.39  | -0.08266 | 2 R.VDETLILC gi 3928909 | 3.79E-12 | 1.55E-04 |
| 16Mar2011 | 6218  | 748.39  | -27.6021 | 2 K.QKSNWH chr5@1229    | 5.65E-12 | 1.55E-04 |

|           |       |         |          |                         |          |          |
|-----------|-------|---------|----------|-------------------------|----------|----------|
| 16Mar2011 | 13904 | 806.37  | -9.17294 | 3 K.FFKPNTD chr5@7527   | 3.82E-16 | 0        |
| 16Mar2011 | 16193 | 912.99  | -3.34628 | 2 F.TEMPLGC chrX@9861   | 5.33E-11 | 0.001535 |
| 16Mar2011 | 3708  | 510.3   | 12.8833  | 2 R.RHVAYVF chr1@1479   | 7.17E-12 | 1.55E-04 |
| 16Mar2011 | 17213 | 987.51  | 4.289691 | 3 K.KYLFLDNI chr4@1288  | 1.31E-10 | 0.003026 |
| 16Mar2011 | 3764  | 510.3   | 12.8833  | 2 R.RHVAYVF chr1@1479   | 1.36E-10 | 0.003026 |
| 16Mar2011 | 19733 | 980.17  | 9.391753 | 3 K.EHVGILT chr1@8945   | 2.23E-10 | 0.004713 |
| 16Mar2011 | 8520  | 438.91  | -18.0263 | 3 _KNDKKT chr2@4168     | 3.94E-10 | 0.009664 |
| 16Mar2011 | 5917  | 936.48  | 27.86052 | 1 K.LNGGYEC chr2@1191   | 3.00E-10 | 0.006599 |
| 16Mar2011 | 5497  | 741.38  | -23.1647 | 2 K.FPENRHI chr2@1477   | 1.24E-10 | 0.003026 |
| 16Mar2011 | 6597  | 841.48  | -24.9081 | 2 _KLNAK+1 chr1@1427    | 3.16E-10 | 0.007187 |
| 16Mar2011 | 2817  | 419.21  | -3.21081 | 3 R.RGASFFA chr3@1105   | 1.34E-10 | 0.003026 |
| 16Mar2011 | 13962 | 806.37  | -9.17294 | 3 K.FFKPNTD chr5@7527   | 1.52E-15 | 0        |
| 16Mar2011 | 16760 | 731.39  | -3.59333 | 2 R.VDETLILC chr2@8606  | 1.06E-11 | 1.55E-04 |
| 16Mar2011 | 18685 | 791.44  | -2.89613 | 2 R.ERRGHTK chr1@7659   | 5.63E-11 | 0.001535 |
| 16Mar2011 | 3127  | 602.24  | -7.71522 | 2 K.YCCVFPD Splice@chr  | 3.64E-10 | 0.008602 |
| 16Mar2011 | 13192 | 801.7   | -6.78619 | 3 K.FFKPNTD chr5@7527   | 1.19E-16 | 0        |
| 16Mar2011 | 3601  | 510.3   | 12.8833  | 2 R.RHVAYVF chr1@1479   | 1.28E-10 | 0.003026 |
| 16Mar2011 | 4808  | 805.42  | -29.245  | 1 K.KMGGM chr5@9928     | 2.49E-11 | 7.51E-04 |
| 16Mar2011 | 18810 | 791.44  | -2.89613 | 2 R.ERRGHTK chr1@7659   | 7.93E-11 | 0.001771 |
| 16Mar2011 | 2971  | 695.35  | -9.5814  | 2 R.SSAEK+1 chr3@3295   | 1.37E-10 | 0.003026 |
| 16Mar2011 | 16990 | 665.37  | -26.6417 | 2 Q.INNK+14 Splice@chr  | 2.44E-10 | 0.005432 |
| 16Mar2011 | 12628 | 725.88  | -4.04164 | 2 I.NFLQLYDI Splice@chr | 3.28E-11 | 0.001167 |
| 16Mar2011 | 3294  | 510.3   | 12.8833  | 2 R.RHVAYVF chr1@1479   | 2.02E-10 | 0.004729 |
| 16Mar2011 | 16402 | 812.12  | 14.27915 | 3 A.EITEMLP Splice@chr  | 2.81E-13 | 0        |
| 16Mar2011 | 9695  | 512.28  | -21.6995 | 3 K.KVQNHSL chr5@4515   | 1.92E-10 | 0.004729 |
| 16Mar2011 | 16390 | 622.08  | 13.36542 | 4 R.RFCAPKT chrX@1320   | 2.51E-10 | 0.006263 |
| 16Mar2011 | 11937 | 556.85  | -28.4079 | 2 R.QNKIVLI Splice@chr  | 3.15E-10 | 0.008146 |
| 16Mar2011 | 13713 | 739.39  | -0.08266 | 2 R.VDETLILC gi 3928909 | 6.03E-12 | 0        |
| 16Mar2011 | 1333  | 873.51  | -11.1925 | 1 R.QLGFPIA chr3@2252   | 3.68E-10 | 0.00922  |
| 16Mar2011 | 5864  | 748.39  | -27.6021 | 2 K.QKSNWH chr5@1225    | 1.87E-11 | 3.46E-04 |
| 16Mar2011 | 13661 | 739.39  | -0.08266 | 2 R.VDETLILC gi 3928909 | 1.90E-12 | 0        |
| 16Mar2011 | 15876 | 731.39  | -3.59333 | 2 R.VDETLILC chr2@8606  | 4.03E-11 | 8.32E-04 |
| 16Mar2011 | 17537 | 791.44  | -2.89613 | 2 R.ERRGHTK chr1@7659   | 2.51E-10 | 0.006263 |
| 16Mar2011 | 3341  | 510.3   | 12.8833  | 2 R.RHVAYVF chr1@1479   | 6.57E-11 | 0.001772 |
| 16Mar2011 | 9748  | 663.85  | -5.06443 | 2 N.KMIFSMI chr4@8622   | 3.29E-10 | 0.008279 |
| 16Mar2011 | 5292  | 741.38  | -23.1647 | 2 K.FPENRHI chr2@1477   | 1.68E-10 | 0.003605 |
| 16Mar2011 | 5173  | 741.38  | -23.1647 | 2 K.FPENRHI chr2@1477   | 2.16E-10 | 0.004851 |
| 16Mar2011 | 13512 | 622.33  | 9.587405 | 2 R.AK+14.01 chr2@4270  | 2.79E-10 | 0.006645 |
| 16Mar2011 | 17087 | 634.83  | -9.39461 | 2 R.VDIGDILF Splice@chr | 7.94E-13 | 0        |
| 16Mar2011 | 2441  | 915.47  | 1.201399 | 1 K.FHEIGGQ chrX@4727   | 1.32E-10 | 0.002601 |
| 16Mar2011 | 16094 | 665.37  | -26.6417 | 2 Q.INNK+14 Splice@chr  | 3.52E-10 | 0.008686 |
| 16Mar2011 | 2349  | 497.77  | 11.3038  | 2 W.YGIDGLS chr2@7307   | 3.46E-10 | 0.008407 |
| 16Mar2011 | 3384  | 510.3   | 12.8833  | 2 R.RHVAYVF chr1@1479   | 1.21E-10 | 0.002459 |
| 16Mar2011 | 14173 | 1056.87 | 4.800118 | 3 I.SRVEDDS Splice@chr  | 4.67E-11 | 9.94E-04 |
| 16Mar2011 | 6083  | 430.72  | -18.0384 | 2 R.VVDSIDG chr5@6422   | 3.28E-10 | 0.008279 |
| 16Mar2011 | 6326  | 841.48  | -24.9081 | 2 _KLNAK+1 chr1@1427    | 1.79E-10 | 0.004188 |
| 16Mar2011 | 16495 | 593.34  | 22.02044 | 2 R.NSHTLPL chrX@9076   | 2.57E-11 | 3.46E-04 |

|           |       |         |          |                         |          |          |
|-----------|-------|---------|----------|-------------------------|----------|----------|
| 16Mar2011 | 16496 | 642.89  | -8.55783 | 2 R.KILIFKGF chr3@3108  | 2.85E-10 | 0.006779 |
| 16Mar2011 | 6900  | 533.82  | 16.26677 | 2 K.TNIYTILTI chr5@1329 | 3.59E-10 | 0.009105 |
| 16Mar2011 | 11752 | 725.88  | -4.04164 | 2 I.NFLQLYDI Splice@chr | 3.18E-11 | 5.07E-04 |
| 16Mar2011 | 6615  | 434.24  | 13.9946  | 3 _RSNDQTI chr5@6378    | 1.44E-10 | 0.002887 |
| 16Mar2011 | 5913  | 748.39  | -27.6021 | 2 K.QKSNWH chr5@1229    | 1.98E-11 | 3.46E-04 |
| 16Mar2011 | 17463 | 791.44  | -2.89613 | 2 R.ERRGHTK chr1@7659   | 2.85E-10 | 0.006779 |
| 16Mar2011 | 16534 | 622.33  | 12.015   | 4 R.RFCAPKT chrX@1320   | 3.64E-10 | 0.00922  |
| 16Mar2011 | 1158  | 459.25  | 4.002563 | 2 R.AIQSASSI chr2@1035  | 1.78E-10 | 0.004188 |
| 16Mar2011 | 9188  | 921.47  | 18.50062 | 1 R.DLDDTSK chrX@7575   | 7.39E-11 | 0.001926 |
| 16Mar2011 | 11865 | 725.88  | -4.04164 | 2 I.NFLQLYDI Splice@chr | 7.24E-11 | 0.001926 |
| 16Mar2011 | 17424 | 838.77  | 22.66832 | 3 R.ACQHCH: chrX@6135   | 3.77E-10 | 0.009481 |
| 16Mar2011 | 19064 | 508.27  | 7.907877 | 3 K.VRHDVIN chr2@5959   | 2.60E-10 | 0.00653  |
| 16Mar2011 | 5675  | 626.3   | -9.76097 | 2 R.LCESGAA Splice@chr  | 4.31E-16 | 0        |
| 16Mar2011 | 6204  | 841.48  | -24.9081 | 2 _KLNAK+1 chr1@1427    | 3.78E-10 | 0.009481 |
| 16Mar2011 | 11808 | 725.88  | -4.04164 | 2 I.NFLQLYDI Splice@chr | 4.12E-11 | 8.32E-04 |
| 16Mar2011 | 14986 | 669.35  | -28.2834 | 2 K.LEFNISKI chr1@1931  | 3.13E-11 | 5.07E-04 |
| 16Mar2011 | 15927 | 744.71  | -3.82989 | 3 R.MTRVFSI chr3@1715   | 1.78E-10 | 0.003894 |
| 16Mar2011 | 17121 | 805.47  | -13.7324 | 2 K.TPIFIPAP: chr5@1861 | 5.11E-11 | 0.001309 |
| 16Mar2011 | 13456 | 622.33  | 9.587405 | 2 R.AK+14.01 chr2@4270  | 1.19E-10 | 0.002459 |
| 16Mar2011 | 14121 | 1056.87 | 4.800118 | 3 I.SRVEDDS: Splice@chr | 2.28E-12 | 0        |
| 16Mar2011 | 4286  | 439.91  | 17.33685 | 3 K.NSQKNPI chr2@3540   | 2.62E-10 | 0.00653  |
| 16Mar2011 | 8363  | 630.86  | 16.57085 | 2 K.SQISQAT: Splice@chr | 3.22E-10 | 0.008146 |
| 16Mar2011 | 9653  | 509.8   | -23.773  | 2 R.SSVIMLIV chr2@5767  | 1.40E-10 | 0.004802 |
| 16Mar2011 | 17078 | 622.08  | 13.36542 | 4 R.RFCAPKT chrX@1320   | 2.62E-10 | 0.007937 |
| 16Mar2011 | 18387 | 791.44  | -2.89613 | 2 R.ERRGHTK chr1@7659   | 3.01E-10 | 0.00889  |
| 16Mar2011 | 11818 | 516.28  | -9.94989 | 2 K.VSVDVLE chrX@1218   | 2.43E-10 | 0.007046 |
| 16Mar2011 | 10498 | 1075.05 | -16.1169 | 2 R.TCSK+14. chr2@1255  | 2.17E-10 | 0.006418 |
| 16Mar2011 | 17893 | 634.84  | 6.410455 | 2 R.VDIGDILF Splice@chr | 7.20E-13 | 2.04E-04 |
| 16Mar2011 | 6466  | 841.98  | -26.9038 | 2 _KLNAK+1 chr1@1427    | 2.82E-10 | 0.008683 |
| 16Mar2011 | 19106 | 1072.51 | -1.90812 | 2 R.NFINNSIE chr4@1705  | 1.10E-10 | 0.00395  |
| 16Mar2011 | 5265  | 741.38  | -23.1647 | 2 K.FPENRHI: chr2@1477  | 1.84E-10 | 0.005561 |
| 16Mar2011 | 11429 | 754.38  | -22.1257 | 3 K.VGTVPDF chr1@3344   | 1.76E-10 | 0.005303 |
| 16Mar2011 | 9708  | 509.8   | -23.773  | 2 R.SSVIMLIV chr2@5767  | 1.26E-10 | 0.004461 |
| 16Mar2011 | 18358 | 791.44  | -2.89613 | 2 R.ERRGHTK chr1@7659   | 2.09E-10 | 0.006308 |
| 16Mar2011 | 14399 | 1005.47 | -16.3827 | 2 K.KVELALW Splice@chr  | 1.70E-22 | 0        |
| 16Mar2011 | 18272 | 791.44  | -2.89613 | 2 R.ERRGHTK chr1@7659   | 1.02E-10 | 0.00354  |
| 16Mar2011 | 12152 | 725.88  | -4.04164 | 2 I.NFLQLYDI Splice@chr | 2.93E-10 | 0.008794 |
| 16Mar2011 | 7199  | 533.82  | 16.26677 | 2 K.TNIYTILTI chr5@1329 | 3.71E-10 | 0.009798 |
| 16Mar2011 | 6330  | 426.24  | 4.742047 | 3 K.YNPNSI\ Splice@chr  | 1.78E-10 | 0.005303 |
| 16Mar2011 | 14143 | 739.39  | -0.08266 | 2 R.VDETLILC gi 3928909 | 2.94E-12 | 5.29E-04 |
| 16Mar2011 | 4497  | 439.91  | -1.85417 | 3 K.VAGSGSL chr5@1747   | 1.78E-10 | 0.005303 |
| 16Mar2011 | 4493  | 805.42  | -29.245  | 1 K.KMGGGN chr5@9928    | 2.12E-10 | 0.006308 |
| 16Mar2011 | 11936 | 1187.91 | -26.8667 | 3 K.NQPIHVF Splice@chr  | 4.02E-11 | 0.001809 |
| 16Mar2011 | 17923 | 805.46  | -26.0992 | 2 K.TPIFIPAP: chr5@1861 | 2.92E-10 | 0.008794 |
| 16Mar2011 | 6343  | 841.98  | -26.9038 | 2 _KLNAK+1 chr1@1427    | 1.95E-10 | 0.005944 |
| 16Mar2011 | 15499 | 669.35  | -28.2834 | 2 K.LEFNISKI chr1@1931  | 7.59E-12 | 6.98E-04 |
| 16Mar2011 | 3351  | 510.3   | 12.8833  | 2 R.RHVAYVF chr1@1479   | 1.28E-10 | 0.004596 |

|           |       |         |          |                         |          |          |
|-----------|-------|---------|----------|-------------------------|----------|----------|
| 16Mar2011 | 13578 | 938.46  | 22.50833 | 2 R.ECSQSDS chr2@8876   | 3.38E-10 | 0.009325 |
| 16Mar2011 | 15911 | 913.5   | 5.790241 | 2 F.TEMPLGC chrX@9861   | 3.90E-11 | 0.001809 |
| 16Mar2011 | 2571  | 915.47  | 1.201399 | 1 K.FHEIGGQ chrX@4727   | 1.30E-10 | 0.004715 |
| 16Mar2011 | 4620  | 487.3   | 24.66358 | 2 K.LQTSNGL Splice@chr  | 1.89E-10 | 0.005816 |
| 16Mar2011 | 9615  | 921.47  | 18.50062 | 1 R.DLDDTSK chrX@7573   | 1.03E-10 | 0.00354  |
| 16Mar2011 | 13917 | 622.33  | 9.587405 | 2 R.AK+14.01 chr2@4270  | 1.84E-10 | 0.005561 |
| 16Mar2011 | 14557 | 983.46  | -3.78963 | 2 R.SFSTIPDS chr2@1305  | 1.02E-14 | 0        |
| 16Mar2011 | 7416  | 533.82  | 16.26677 | 2 K.TNIYTILT chr5@1329  | 2.07E-10 | 0.006308 |
| 16Mar2011 | 14599 | 888.46  | 11.62323 | 2 K.DITLEVEA Splice@chr | 7.22E-12 | 6.98E-04 |
| 16Mar2011 | 1104  | 410.25  | 18.74326 | 2 R.KNGSATI chr5@1162   | 1.77E-10 | 0.005303 |
| 16Mar2011 | 15806 | 899.96  | -7.09784 | 2 R.SK+14.01 chrX@1700  | 3.77E-10 | 0.00991  |
| 16Mar2011 | 14452 | 1005.47 | -16.3827 | 2 K.KVELALM Splice@chr  | 1.55E-22 | 0        |
| 16Mar2011 | 3451  | 510.3   | 12.8833  | 2 R.RHVAYVF chr1@1479   | 1.21E-10 | 0.004324 |
| 16Mar2011 | 11143 | 661.4   | -2.4954  | 2 K.LVLIAVN1 chr1@6528  | 3.38E-10 | 0.009325 |
| 16Mar2011 | 5959  | 841.48  | -24.9081 | 2 _KLNAK+1 chr1@1427    | 2.79E-10 | 0.008683 |
| 16Mar2011 | 14194 | 739.39  | -0.08266 | 2 R.VDETLILC gi 3928909 | 2.41E-12 | 5.29E-04 |
| 16Mar2011 | 12204 | 725.88  | -4.04164 | 2 I.NFLQLYDI Splice@chr | 1.79E-10 | 0.005433 |
| 16Mar2011 | 14205 | 563.86  | -24.1467 | 2 R.QNK+14. Splice@chr  | 1.62E-10 | 0.004927 |
| 16Mar2011 | 1314  | 801.46  | -26.9469 | 1 K.WAGVVL chr4@3669    | 7.32E-11 | 0.002902 |
| 16Mar2011 | 12258 | 725.88  | -4.04164 | 2 I.NFLQLYDI Splice@chr | 1.22E-10 | 0.004324 |
| 16Mar2011 | 13076 | 813.41  | -23.8154 | 2 _QGKM+1 Splice@chr    | 3.01E-10 | 0.00889  |
| 16Mar2011 | 17858 | 634.83  | -9.39461 | 2 R.VDIGDILF Splice@chr | 1.27E-12 | 3.86E-04 |
| 16Mar2011 | 6315  | 430.72  | -18.0384 | 2 R.VVDSIDG chr5@6422   | 3.50E-10 | 0.009436 |
| 16Mar2011 | 3399  | 510.3   | 12.8833  | 2 R.RHVAYVF chr1@1479   | 6.40E-11 | 0.002902 |
| 16Mar2011 | 18307 | 791.44  | -2.89613 | 2 R.ERRGHTK chr1@7659   | 6.33E-11 | 0.002902 |
| 16Mar2011 | 14813 | 938.46  | 22.50833 | 2 R.ECSQSDS chr2@8876   | 2.86E-10 | 0.006991 |
| 16Mar2011 | 18685 | 622.08  | 13.36542 | 4 R.RFCAPKT chrX@1320   | 3.78E-10 | 0.008571 |
| 16Mar2011 | 19121 | 593.34  | 22.02044 | 2 R.NSHTLPL chrX@9076   | 2.12E-10 | 0.005678 |
| 16Mar2011 | 20469 | 791.44  | -2.89613 | 2 R.ERRGHTK chr1@7659   | 5.27E-11 | 0.001341 |
| 16Mar2011 | 11078 | 701.38  | -29.6051 | 2 F.DKNIWNI chr5@6029   | 3.30E-10 | 0.007485 |
| 16Mar2011 | 2579  | 517.29  | -7.09318 | 2 _FRVEVVE Splice@chr   | 4.14E-11 | 9.53E-04 |
| 16Mar2011 | 1910  | 601.84  | -8.58919 | 2 R.EDVGEK+ Splice@chr  | 1.97E-10 | 0.005458 |
| 16Mar2011 | 13134 | 1042.55 | 20.23923 | 1 R.YLELDNFI Splice@chr | 6.53E-11 | 0.001585 |
| 16Mar2011 | 2527  | 517.29  | -7.09318 | 2 _FRVEVVE Splice@chr   | 8.23E-11 | 0.002465 |
| 16Mar2011 | 7175  | 693.87  | -22.5509 | 2 L.VEKSVFP chr3@2866   | 2.00E-10 | 0.005458 |
| 16Mar2011 | 3263  | 510.3   | 12.8833  | 2 R.RHVAYVF chr1@1479   | 1.21E-10 | 0.004282 |
| 16Mar2011 | 6749  | 841.98  | -26.9038 | 2 _KLNAK+1 chr1@1427    | 1.74E-10 | 0.004913 |
| 16Mar2011 | 2509  | 589.36  | 24.58678 | 2 R.ELSLNTFL chr5@2421  | 3.04E-11 | 5.57E-04 |
| 16Mar2011 | 809   | 570.31  | -1.66134 | 2 Q.EDADVLI chr3@7536   | 3.53E-10 | 0.007928 |
| 16Mar2011 | 15490 | 833.44  | -21.0656 | 1 R.NLGVHHI chr2@1106   | 1.43E-10 | 0.004585 |
| 16Mar2011 | 18875 | 622.08  | 13.36542 | 4 R.RFCAPKT chrX@1320   | 3.55E-10 | 0.007928 |
| 16Mar2011 | 5598  | 741.38  | -23.1647 | 2 K.FPENRHI chr2@1477   | 1.97E-10 | 0.005458 |
| 16Mar2011 | 6534  | 748.39  | -27.6021 | 2 K.QKSNWH chr5@1229    | 6.47E-11 | 0.001585 |
| 16Mar2011 | 19894 | 634.84  | 6.410455 | 2 R.VDIGDILF Splice@chr | 3.04E-13 | 0        |
| 16Mar2011 | 13364 | 725.88  | -4.04164 | 2 I.NFLQLYDI Splice@chr | 1.23E-10 | 0.004282 |
| 16Mar2011 | 6695  | 841.48  | -24.9081 | 2 _KLNAK+1 chr1@1427    | 3.64E-10 | 0.008365 |
| 16Mar2011 | 3154  | 498.58  | 26.57833 | 3 R.SQYLQM Splice@chr   | 2.73E-10 | 0.006549 |

|           |       |         |          |                         |          |          |
|-----------|-------|---------|----------|-------------------------|----------|----------|
| 16Mar2011 | 15349 | 622.33  | 9.587405 | 2 R.AK+14.01 chr2@4270  | 2.99E-10 | 0.007282 |
| 16Mar2011 | 17249 | 991.51  | 24.02083 | 3 _IYVPADD Splice@chr   | 7.69E-17 | 0        |
| 16Mar2011 | 13543 | 556.85  | -28.4079 | 2 R.QNKIVLH Splice@chr  | 3.70E-10 | 0.008365 |
| 16Mar2011 | 355   | 873.51  | -11.1925 | 1 R.QLGFPIA chr3@2252   | 3.46E-10 | 0.007706 |
| 16Mar2011 | 21234 | 1147.24 | 4.705638 | 3 R.FQSAAIG Splice@chr  | 4.13E-13 | 0        |
| 16Mar2011 | 5377  | 439.75  | -7.44254 | 2 K.LYGEVGL chrX@2908   | 1.02E-10 | 0.003557 |
| 16Mar2011 | 7542  | 434.24  | 13.9946  | 3 _RSNDQTI chr5@6378    | 2.11E-10 | 0.005678 |
| 16Mar2011 | 18677 | 902.53  | 6.025544 | 1 R.RCGVIGL chr3@1087   | 1.18E-10 | 0.003915 |
| 16Mar2011 | 19849 | 634.84  | 6.410455 | 2 R.VDIGDILF Splice@chr | 2.20E-12 | 1.49E-04 |
| 16Mar2011 | 15610 | 739.39  | -0.08266 | 2 R.VDETLILC gi 3928909 | 3.68E-13 | 0        |
| 16Mar2011 | 11414 | 1075.05 | -16.1169 | 2 R.TCSK+14. chr2@1255  | 5.29E-11 | 0.001341 |
| 16Mar2011 | 16630 | 747.39  | 13.7081  | 2 K.MLRFNEC chr2@8359   | 1.11E-10 | 0.003677 |
| 16Mar2011 | 3218  | 510.3   | 12.8833  | 2 R.RHVAYVF chr1@1479   | 6.54E-12 | 1.49E-04 |
| 16Mar2011 | 20373 | 791.44  | -2.89613 | 2 R.ERRGHTK chr1@7659   | 2.47E-10 | 0.006453 |
| 16Mar2011 | 270   | 801.46  | -26.9469 | 1 K.WAGVVL chr4@3669    | 7.32E-11 | 0.002093 |
| 16Mar2011 | 18497 | 665.37  | -26.6417 | 2 Q.INNK+14 Splice@chr  | 3.64E-10 | 0.008265 |
| 16Mar2011 | 12468 | 708.38  | 4.10295  | 2 R.EQLDQGI Splice@chr  | 3.07E-10 | 0.007282 |
| 16Mar2011 | 6402  | 524.28  | -11.2752 | 3 R.APFSHPL chrX@6165   | 3.24E-11 | 6.93E-04 |
| 16Mar2011 | 13313 | 725.88  | -4.04164 | 2 I.NFLQLYDI Splice@chr | 6.11E-11 | 0.001585 |
| 16Mar2011 | 20719 | 953.02  | 5.934625 | 2 K.EKKCNLIS chr1@1262  | 1.41E-10 | 0.004585 |
| 16Mar2011 | 13085 | 1042.55 | 20.23923 | 1 R.YLELDNFI Splice@chr | 1.35E-11 | 1.49E-04 |
| 16Mar2011 | 7844  | 534.32  | 13.11853 | 2 K.TNIYTILTI chr5@1329 | 3.19E-10 | 0.007381 |
| 16Mar2011 | 13261 | 725.88  | -4.04164 | 2 I.NFLQLYDI Splice@chr | 1.25E-10 | 0.00439  |
| 16Mar2011 | 16901 | 722.45  | -4.95112 | 2 R.RK+14.01 Splice@chr | 1.48E-10 | 0.004585 |
| 16Mar2011 | 3311  | 510.3   | 12.8833  | 2 R.RHVAYVF chr1@1479   | 1.28E-10 | 0.00439  |
| 16Mar2011 | 19178 | 762.91  | -29.6394 | 2 _TMYAIVK chr4@1217    | 1.95E-10 | 0.005458 |
| 16Mar2011 | 7774  | 533.82  | 16.26677 | 2 K.TNIYTILTI chr5@1329 | 1.72E-10 | 0.004801 |
| 16Mar2011 | 19829 | 805.46  | -26.0992 | 2 K.TPIFIPAP chr5@1861  | 2.04E-10 | 0.005458 |
| 16Mar2011 | 7901  | 534.32  | 13.11853 | 2 K.TNIYTILTI chr5@1329 | 2.82E-10 | 0.006875 |
| 16Mar2011 | 13043 | 833.41  | -5.13266 | 2 _IDM+15.5 chrX@3237   | 1.87E-10 | 0.005251 |
| 16Mar2011 | 17200 | 991.51  | 24.02083 | 3 _IYVPADD Splice@chr   | 1.35E-14 | 0        |
| 16Mar2011 | 15555 | 739.39  | -0.08266 | 2 R.VDETLILC gi 3928909 | 1.72E-12 | 1.49E-04 |
| 16Mar2011 | 3676  | 517.33  | 6.214252 | 2 R.KMLRMIL chr1@1158   | 1.68E-10 | 0.004685 |
| 16Mar2011 | 6011  | 936.48  | 27.86052 | 1 K.LNGGYEC chr2@1191   | 2.63E-11 | 4.21E-04 |
| 16Mar2011 | 3825  | 510.3   | 12.8833  | 2 R.RHVAYVF chr1@1479   | 1.03E-10 | 0.003076 |
| 16Mar2011 | 2602  | 601.84  | -8.58919 | 2 R.EDVGEEK Splice@chr  | 2.12E-10 | 0.005515 |
| 16Mar2011 | 12879 | 1042.55 | 20.23923 | 1 R.YLELDNFI Splice@chr | 1.04E-10 | 0.003076 |
| 16Mar2011 | 20787 | 1147.24 | 4.705638 | 3 R.FQSAAIG Splice@chr  | 1.06E-11 | 3.19E-04 |
| 16Mar2011 | 3926  | 510.3   | 12.8833  | 2 R.RHVAYVF chr1@1479   | 1.21E-10 | 0.003298 |
| 16Mar2011 | 18608 | 622.33  | 12.015   | 4 R.RFCAPKT chrX@1320   | 3.44E-11 | 0.001311 |
| 16Mar2011 | 16719 | 669.35  | -28.2834 | 2 K.LEFNISKH chr1@1931  | 5.79E-11 | 0.001694 |
| 16Mar2011 | 15293 | 739.39  | -0.08266 | 2 R.VDETLILC gi 3928909 | 3.94E-13 | 0        |
| 16Mar2011 | 15030 | 622.33  | 9.587405 | 2 R.AK+14.01 chr2@4270  | 2.05E-10 | 0.005319 |
| 16Mar2011 | 512   | 743.48  | 2.794988 | 1 K.KIGGAGII chr1@2885  | 2.86E-10 | 0.006771 |
| 16Mar2011 | 6363  | 489.28  | 28.87637 | 2 R.RGTASRS chr5@1951   | 2.67E-10 | 0.00645  |
| 16Mar2011 | 19970 | 791.43  | -15.5678 | 2 R.ERRGHTK chr1@7659   | 6.60E-11 | 0.002219 |
| 16Mar2011 | 13064 | 624.33  | -21.4438 | 2 R.FANK+14 Splice@chr  | 5.72E-12 | 3.19E-04 |

|           |       |         |          |                         |          |          |
|-----------|-------|---------|----------|-------------------------|----------|----------|
| 16Mar2011 | 20381 | 959.03  | 9.429101 | 2 Y.NNCKLNS chrX@1250   | 3.49E-11 | 0.001311 |
| 16Mar2011 | 807   | 570.31  | -24.229  | 2 K.RSK+14.0 chr4@1472  | 2.53E-10 | 0.005853 |
| 16Mar2011 | 20014 | 791.44  | -2.89613 | 2 R.ERRGHTK chr1@7659   | 1.91E-10 | 0.005218 |
| 16Mar2011 | 13099 | 725.88  | -4.04164 | 2 I.NFLQLYDI Splice@chr | 2.84E-11 | 0.001188 |
| 16Mar2011 | 15180 | 833.44  | -21.0656 | 1 R.NLGVHHI chr2@1106   | 1.35E-10 | 0.003553 |
| 16Mar2011 | 15229 | 833.44  | -21.0656 | 1 R.NLGVHHI chr2@1106   | 3.90E-10 | 0.00951  |
| 16Mar2011 | 18200 | 819.09  | 17.24258 | 3 K.QNSVQG Splice@chr   | 3.04E-10 | 0.007243 |
| 16Mar2011 | 18711 | 694.87  | 2.550973 | 2 K.YHNITLQ chrX@3836   | 3.20E-10 | 0.007571 |
| 16Mar2011 | 12925 | 1042.55 | 20.23923 | 1 R.YLELDNFI Splice@chr | 2.58E-11 | 7.49E-04 |
| 16Mar2011 | 4701  | 536.29  | -10.9462 | 2 _QVEFNPI Splice@chr   | 9.48E-12 | 3.19E-04 |
| 16Mar2011 | 13221 | 556.85  | -28.4079 | 2 R.QNKIVLI Splice@chr  | 3.48E-10 | 0.008378 |
| 16Mar2011 | 15239 | 739.39  | -0.08266 | 2 R.VDETLILC gi 3928909 | 3.10E-12 | 0        |
| 16Mar2011 | 6662  | 748.39  | -27.6021 | 2 K.QKSNWH chr5@1229    | 5.72E-12 | 3.19E-04 |
| 16Mar2011 | 19407 | 634.84  | 6.410455 | 2 R.VDIGDILF Splice@chr | 4.19E-13 | 0        |
| 16Mar2011 | 5928  | 741.38  | -23.1647 | 2 K.FPENRHI chr2@1472   | 3.52E-10 | 0.008495 |
| 16Mar2011 | 19864 | 791.44  | -2.89613 | 2 R.ERRGHTK chr1@7659   | 2.80E-10 | 0.006771 |
| 16Mar2011 | 19429 | 805.97  | -15.8175 | 2 K.TPIFIPAP chr5@1861  | 1.87E-10 | 0.004864 |
| 16Mar2011 | 2489  | 600.34  | -18.2932 | 2 K.EKK+14.0 Splice@chr | 2.02E-10 | 0.005319 |
| 16Mar2011 | 20824 | 1047.06 | 2.482016 | 2 L.ESSQKIDI chr4@3516  | 3.75E-10 | 0.009055 |
| 16Mar2011 | 17521 | 819.48  | -3.09532 | 2 F.EFLIK+14 chr5@1080  | 2.49E-10 | 0.005853 |
| 16Mar2011 | 20801 | 1147.24 | 4.705638 | 3 R.FQSAAIG Splice@chr  | 1.99E-11 | 7.49E-04 |
| 16Mar2011 | 16920 | 991.51  | 24.02083 | 3 _IYVPADD Splice@chr   | 7.61E-14 | 0        |
| 16Mar2011 | 648   | 515.33  | 11.70274 | 2 _KQKPKFP chr5@2015    | 2.32E-10 | 0.005515 |
| 16Mar2011 | 19363 | 634.84  | 6.410455 | 2 R.VDIGDILF Splice@chr | 2.75E-12 | 0        |
| 16Mar2011 | 1271  | 565.27  | -6.05738 | 2 _RSEFSSNI chr1@1388   | 2.48E-10 | 0.005751 |
| 16Mar2011 | 11100 | 701.38  | -29.6051 | 2 F.DKNIWNI chr5@6029   | 1.64E-10 | 0.004135 |
| 16Mar2011 | 12834 | 1042.55 | 20.23923 | 1 R.YLELDNFI Splice@chr | 4.37E-11 | 0.00144  |
| 16Mar2011 | 2061  | 560.3   | -21.498  | 2 _PAFDTIGI Splice@chr  | 2.54E-10 | 0.005853 |
| 16Mar2011 | 15923 | 746.91  | -22.4202 | 2 I.SSNRLM+ Splice@chr  | 3.12E-10 | 0.007355 |
| 16Mar2011 | 11374 | 1075.05 | -16.1169 | 2 R.TCSK+14 chr2@1253   | 3.51E-10 | 0.008378 |
| 16Mar2011 | 3876  | 510.3   | 12.8833  | 2 R.RHVAYVF chr1@1479   | 1.21E-10 | 0.003298 |
| 16Mar2011 | 13152 | 725.88  | -4.04164 | 2 I.NFLQLYDI Splice@chr | 2.31E-10 | 0.005515 |
| 16Mar2011 | 3464  | 498.58  | 26.57833 | 3 R.SQYLQM Splice@chr   | 2.66E-10 | 0.00645  |
| 16Mar2011 | 15797 | 1056.56 | 28.0642  | 3 I.SRVEDDS Splice@chr  | 1.25E-12 | 0        |
| 16Mar2011 | 20947 | 1072.51 | -1.90812 | 2 R.NFINNSIE chr4@1703  | 2.86E-10 | 0.006771 |
| 16Mar2011 | 8173  | 893.96  | 17.68046 | 2 _VADGNY Splice@chr    | 8.34E-11 | 0.002871 |
| 16Mar2011 | 6875  | 566.81  | 0.647242 | 2 I.RIPLDYAE chr5@2047  | 3.97E-11 | 0.00144  |
| 16Mar2011 | 7477  | 434.24  | 13.9946  | 3 _RSNDQTI chr5@6378    | 8.44E-11 | 0.002871 |
| 16Mar2011 | 6228  | 936.48  | 27.86052 | 1 K.LNGGYEC chr2@1191   | 1.75E-11 | 6.20E-04 |
| 16Mar2011 | 7648  | 434.24  | 13.9946  | 3 _RSNDQTI chr5@6378    | 3.98E-10 | 0.009614 |
| 16Mar2011 | 11426 | 1075.05 | -16.1169 | 2 R.TCSK+14 chr2@1253   | 2.74E-10 | 0.006567 |
| 16Mar2011 | 7839  | 533.82  | 16.26677 | 2 K.TNIYTILTI chr5@1329 | 2.64E-10 | 0.006211 |
| 16Mar2011 | 8113  | 893.96  | 17.68046 | 2 _VADGNY Splice@chr    | 8.98E-13 | 0        |
| 16Mar2011 | 20093 | 1135.55 | 14.23679 | 2 _EWEDWC Splice@chr    | 2.72E-10 | 0.006567 |
| 16Mar2011 | 5811  | 741.38  | -23.1647 | 2 K.FPENRHI chr2@1472   | 2.08E-10 | 0.005515 |
| 17Dec2011 | 6259  | 1044.07 | 4.096092 | 2 R.SLQTEV Splice@chr   | 1.51E-20 | 0        |
| 17Dec2011 | 6293  | 1044.07 | 4.096092 | 2 R.SLQTEV Splice@chr   | 7.83E-17 | 0        |

|           |      |         |          |                        |          |          |
|-----------|------|---------|----------|------------------------|----------|----------|
| 17Dec2011 | 6291 | 1044.58 | 12.0845  | 2 R.SQLQTEV Splice@chr | 1.16E-18 | 0        |
| 17Dec2011 | 6168 | 717.89  | -17.2831 | 2 K.LRGWNK chr3@8881   | 3.53E-11 | 0.005357 |
| 17Dec2011 | 6254 | 1044.57 | 2.487942 | 2 R.SQLQTEV Splice@chr | 8.20E-22 | 0        |
| 17Dec2011 | 8505 | 1044.57 | 2.487942 | 2 R.SQLQTEV Splice@chr | 1.74E-21 | 0        |
| 17Dec2011 | 8506 | 1044.07 | 4.096092 | 2 R.SQLQTEV Splice@chr | 2.82E-21 | 0        |
| 17Dec2011 | 8434 | 1044.57 | 2.487942 | 2 R.SQLQTEV Splice@chr | 2.41E-21 | 0        |
| 17Dec2011 | 8449 | 1044.07 | 4.096092 | 2 R.SQLQTEV Splice@chr | 9.70E-22 | 0        |
| 17Dec2011 | 1505 | 706.39  | -21.1123 | 2 K.LK+14.01 chr1@1334 | 3.07E-11 | 0.006826 |
| 17Dec2011 | 1886 | 509.3   | -20.473  | 2 R.SSVIMLIV chr2@5767 | 1.88E-11 | 0.003509 |
| 17Dec2011 | 1488 | 706.4   | -6.92208 | 2 K.LK+14.01 chr1@1334 | 4.86E-11 | 0.009967 |
| 17Dec2011 | 1869 | 509.3   | -20.473  | 2 R.SSVIMLIV chr2@5767 | 1.88E-11 | 0.003509 |
| 17Dec2011 | 1704 | 793.42  | 19.33353 | 2 R.NEKYSTV Splice@chr | 4.16E-12 | 0.008333 |
| 17Dec2011 | 969  | 793.42  | 19.33353 | 2 R.NEKYSTV Splice@chr | 5.45E-11 | 0.009259 |
| 17Dec2011 | 6745 | 1025.61 | -11.6755 | 1 K.LGLGSGL chr5@4945  | 4.78E-12 | 0        |
| 17Dec2011 | 6712 | 1025.61 | -11.6755 | 1 K.LGLGSGL chr5@4945  | 4.74E-11 | 0        |
| 17Dec2011 | 7906 | 584.69  | -9.76929 | 5 _TVFYGDL chr4@5567   | 1.62E-10 | 0.004992 |
| 17Dec2011 | 5212 | 702.34  | -26.3396 | 3 _SLKNMKE chr2@9388   | 1.84E-11 | 0.005714 |
| 17Dec2011 | 5903 | 1157.62 | 4.491275 | 1 _NLVYNSK chr2@1346   | 7.09E-11 | 0.009259 |
| 17Dec2011 | 2033 | 655.42  | -8.48724 | 2 K.KKK+14.C chr5@1845 | 2.24E-11 | 0        |
| 17Dec2011 | 2605 | 883.39  | -18.0533 | 2 R.CAYHGK5 chr5@1262  | 1.07E-10 | 0.00656  |
| 17Dec2011 | 1475 | 1046.57 | 23.35072 | 1 R.NSSRRPS Splice@chr | 2.49E-11 | 0.001649 |
| 17Dec2011 | 2105 | 626.3   | -9.76097 | 2 R.LCESGAA Splice@chr | 5.07E-14 | 0        |
| 17Dec2011 | 478  | 702.38  | 2.001521 | 1 _DAAGLAC chr3@2528   | 5.12E-12 | 9.85E-04 |
| 17Dec2011 | 2140 | 626.3   | -9.76097 | 2 R.LCESGAA Splice@chr | 3.27E-15 | 0        |
| 17Dec2011 | 3250 | 509.3   | -20.473  | 2 R.SSVIMLIV chr2@5767 | 1.88E-11 | 0.001649 |
| 17Dec2011 | 5860 | 1025.61 | -11.6755 | 1 K.LGLGSGL chr5@4945  | 1.74E-11 | 0.00223  |
| 17Dec2011 | 5317 | 857.95  | -13.2476 | 2 R.RM+15.9 chr1@1195  | 1.37E-11 | 0.001718 |
| 17Dec2011 | 408  | 1034.52 | 14.17366 | 1 _TLKNGEC Splice@chr  | 8.91E-11 | 0.008439 |
| 17Dec2011 | 1066 | 706.39  | -21.1123 | 2 K.LK+14.01 chr1@1334 | 1.26E-10 | 0.009132 |
| 17Dec2011 | 1544 | 655.42  | -8.48724 | 2 K.KKK+14.C chr5@1845 | 2.06E-11 | 0        |
| 17Dec2011 | 1500 | 876.4   | -19.8707 | 1 K.TEDEARR chrX@1138  | 4.26E-11 | 0.007442 |
| 17Dec2011 | 3335 | 509.3   | -20.473  | 2 R.SSVIMLIV chr2@5767 | 6.54E-11 | 0.008059 |
| 17Dec2011 | 4428 | 759.88  | -7.28215 | 2 S.IDQLQLAI chr1@8550 | 1.20E-10 | 0.008906 |
| 17Dec2011 | 6648 | 513.31  | -9.53103 | 2 K.LGLGSGL chr5@4945  | 5.93E-12 | 0.001574 |
| 17Dec2011 | 1763 | 737.89  | -11.2294 | 2 K.VSWVAQ chr1@3777   | 1.10E-10 | 0.008906 |
| 17Dec2011 | 1481 | 481.26  | 13.74248 | 2 R.WRAWW chr2@9736    | 8.74E-11 | 0.008906 |
| 17Dec2011 | 1697 | 626.3   | -9.76097 | 2 R.LCESGAA Splice@chr | 7.89E-14 | 0        |
| 17Dec2011 | 3361 | 509.3   | -20.473  | 2 R.SSVIMLIV chr2@5767 | 1.88E-11 | 0.004444 |
| 17Dec2011 | 7486 | 1346.13 | -3.69865 | 2 _QVREMH Splice@chr   | 5.57E-11 | 0.007442 |
| 17Dec2011 | 341  | 702.38  | 2.001521 | 1 _DAAGLAC chr3@2528   | 5.12E-12 | 0.001574 |
| 17Dec2011 | 680  | 1046.55 | 4.319884 | 1 R.NSSRRPS Splice@chr | 8.32E-11 | 0.008841 |
| 17Dec2011 | 5621 | 1345.63 | -24.7692 | 2 _QVREMH Splice@chr   | 6.30E-11 | 0.008841 |
| 17Dec2011 | 5980 | 717.89  | -17.2831 | 2 K.LRGWNK chr3@8881   | 1.33E-10 | 0.009775 |
| 17Dec2011 | 5779 | 859.14  | 2.870693 | 3 _LRFKDNC chrX@1053   | 4.31E-11 | 0.004484 |
| 17Dec2011 | 4225 | 696.37  | -15.3603 | 2 _LPTSPIGC chr5@1204  | 1.76E-10 | 0.008264 |
| 17Dec2011 | 3449 | 655.42  | -8.48724 | 2 K.KKK+14.C chr5@1845 | 1.75E-11 | 0.00545  |
| 17Dec2011 | 4505 | 717.89  | -17.2831 | 2 K.LRGWNK chr3@8881   | 6.74E-11 | 0.001289 |

|            |       |         |          |                         |          |          |
|------------|-------|---------|----------|-------------------------|----------|----------|
| 17Dec2011  | 4710  | 895     | -10.9918 | 2 K.M+15.99 chrX@144    | 1.31E-10 | 0.009975 |
| 17Dec2011  | 4844  | 1044.07 | 4.096092 | 2 R.SQLQTEV Splice@chr  | 2.99E-20 | 0        |
| 17Dec2011  | 1332  | 794.43  | -5.96418 | 2 R.TK+14.01 chr1@723   | 1.86E-11 | 0.003778 |
| 17Dec2011  | 3407  | 655.42  | -8.48724 | 2 K.KKK+14.C chr5@184   | 4.96E-11 | 0.009401 |
| 17Dec2011  | 1089  | 876.4   | -19.8707 | 1 K.TEDEARR chrX@113    | 4.26E-11 | 0.008343 |
| 17Dec2011  | 1938  | 793.42  | 19.33353 | 2 R.NEKYSTV Splice@chr  | 3.95E-11 | 0        |
| 17Dec2011  | 1965  | 793.42  | 19.33353 | 2 R.NEKYSTV Splice@chr  | 1.60E-10 | 0.001527 |
| 17Dec2011  | 4375  | 1079.57 | 16.07164 | 1 R.FISHFTAE chr4@698   | 2.96E-11 | 0        |
| 17Dec2011  | 416   | 778.37  | -18.9721 | 2 K.IEKEM+1 Splice@chr  | 2.87E-10 | 0.009021 |
| 17Dec2011  | 4101  | 584.69  | -9.76929 | 5 _TVFYGDL chr4@556     | 1.28E-11 | 0        |
| 17Dec2011  | 1092  | 793.42  | 19.33353 | 2 R.NEKYSTV Splice@chr  | 1.31E-10 | 0.001361 |
| 17Dec2011  | 859   | 830.41  | -17.1642 | 1 K.YVYGTAR Splice@chr  | 8.80E-11 | 0.001361 |
| 17Dec2011  | 1077  | 793.42  | 19.33353 | 2 R.NEKYSTV Splice@chr  | 2.61E-11 | 0        |
| 19July2011 | 10941 | 792.16  | -5.99938 | 4 K.SGTIFDNI Splice@chr | 2.41E-13 | 0        |
| 19July2011 | 6905  | 563.27  | -13.5689 | 2 K.MSARNYI chrX@104    | 5.47E-11 | 0.003235 |
| 19July2011 | 2551  | 471.28  | 10.90222 | 2 R.KVETVHT chr5@115    | 3.02E-10 | 0.008323 |
| 19July2011 | 7156  | 664.7   | 1.197202 | 3 _PTLNK+1. chr1@652    | 2.51E-10 | 0.007208 |
| 19July2011 | 10868 | 792.16  | -5.99938 | 4 K.SGTIFDNI Splice@chr | 3.75E-11 | 0.002808 |
| 19July2011 | 2633  | 428.28  | 2.571278 | 3 K.SNILISLK chr1@567   | 2.30E-10 | 0.006846 |
| 19July2011 | 7874  | 762.4   | 0.669255 | 3 _FYSM+15 chrX@998     | 2.83E-10 | 0.007974 |
| 19July2011 | 3724  | 691.83  | 0.045762 | 2 _FVSLTIGL chr1@107    | 1.60E-10 | 0.005304 |
| 19July2011 | 6233  | 924.91  | -13.6479 | 2 Q.KPDDISN Splice@chr  | 5.24E-11 | 0.003034 |
| 19July2011 | 10465 | 787.89  | 24.95531 | 2 K.FWREIQM chrX@165    | 2.14E-10 | 0.006259 |
| 19July2011 | 9041  | 895     | -10.9918 | 2 K.M+15.99 chrX@144    | 3.31E-10 | 0.008871 |
| 19July2011 | 8136  | 760.72  | 18.35362 | 3 R.RAINGTE Splice@chr  | 1.30E-10 | 0.004769 |
| 19July2011 | 8156  | 740.42  | -24.9849 | 2 _DKLK+14. chr4@717    | 2.04E-10 | 0.005481 |
| 19July2011 | 682   | 632.33  | 21.173   | 2 _KENEVEK Splice@chr   | 3.46E-10 | 0.008722 |
| 19July2011 | 9597  | 803.46  | 16.32798 | 3 S.KCRK+14. chrX@576   | 2.65E-10 | 0.006878 |
| 19July2011 | 1367  | 433.76  | 2.609238 | 2 _IVDLPGPI chr3@110    | 5.05E-11 | 0.00127  |
| 19July2011 | 10256 | 787.88  | 12.22608 | 2 K.FWREIQM chrX@165    | 1.13E-10 | 0.002613 |
| 19July2011 | 847   | 412.23  | 25.3069  | 2 R.IASYQGG chrX@167    | 3.37E-11 | 2.62E-04 |
| 19July2011 | 5500  | 472.29  | -0.64754 | 2 _SPLFVPKI chrX@440    | 1.30E-10 | 0.003524 |
| 19July2011 | 6244  | 924.91  | -13.6479 | 2 Q.KPDDISN Splice@chr  | 8.68E-11 | 0.001924 |
| 19July2011 | 7166  | 555.63  | -25.3104 | 3 R.YFK+14.0 chr1@162   | 1.41E-10 | 0.003524 |
| 19July2011 | 5718  | 671.37  | -24.0361 | 2 T.FNIVHTQ Splice@chr  | 2.59E-10 | 0.006878 |
| 19July2011 | 11001 | 1120.61 | -14.6972 | 2 R.SLEYRNV chr5@852    | 2.11E-10 | 0.005681 |
| 19July2011 | 5678  | 472.29  | -0.64754 | 2 _SPLFVPKI chrX@440    | 3.76E-10 | 0.009738 |
| 19July2011 | 9544  | 855.48  | -6.07153 | 2 K.IFTQTK+1 Splice@chr | 2.41E-10 | 0.006725 |
| 19July2011 | 6692  | 599.62  | 1.63138  | 3 R.NAEAAI Splice@chr   | 4.24E-13 | 2.66E-04 |
| 19July2011 | 2457  | 587.3   | 4.892896 | 2 Q.NAVEQE Splice@chr   | 3.52E-12 | 4.07E-04 |
| 19July2011 | 7396  | 603.32  | -10.6063 | 3 K.LTKLNYI Splice@chr  | 5.70E-11 | 0.00206  |
| 19July2011 | 7559  | 626.68  | 23.52414 | 3 R.VVDALGI Splice@chr  | 1.18E-12 | 2.66E-04 |
| 19July2011 | 7509  | 603.65  | -17.9349 | 3 K.LTKLNYI Splice@chr  | 2.18E-10 | 0.005435 |
| 19July2011 | 3525  | 526.78  | -3.83085 | 2 K.KLDLNM chr2@718     | 6.67E-11 | 0.00295  |
| 19July2011 | 11043 | 685.88  | 4.188613 | 2 K.IVPGGGA chrX@157    | 2.02E-14 | 0        |
| 19July2011 | 9146  | 515.62  | 14.07456 | 3 _QNLSLFF Splice@chr   | 2.46E-10 | 0.005874 |
| 19July2011 | 2575  | 544.79  | 1.908116 | 2 R.GTNVLVS Splice@chr  | 2.91E-12 | 4.07E-04 |

|            |       |        |          |                         |          |          |
|------------|-------|--------|----------|-------------------------|----------|----------|
| 19July2011 | 2578  | 584.31 | 9.626723 | 2 R.FSLKNTEI chr4@2692  | 7.31E-11 | 0.003488 |
| 19July2011 | 14616 | 787.89 | 24.95531 | 2 K.FWREIQM chrX@1650   | 9.07E-11 | 0.003887 |
| 19July2011 | 6742  | 599.62 | 1.63138  | 3 R.NAEEEAAI Splice@chr | 3.41E-14 | 0        |
| 19July2011 | 6133  | 639.29 | 11.25892 | 3 R.AYSFMSS chrX@4976   | 2.57E-12 | 4.07E-04 |
| 19July2011 | 1815  | 454.25 | 21.70768 | 2 R.RSMRNSI chr5@1004   | 2.60E-10 | 0.006319 |
| 19July2011 | 8537  | 472.29 | -0.64754 | 2 _SPLFVPKI chrX@4402   | 2.61E-10 | 0.006319 |
| 19July2011 | 5764  | 588.29 | -10.2888 | 2 R.QIDKLEN chr5@2475   | 1.92E-11 | 4.07E-04 |
| 19July2011 | 4880  | 693.87 | -6.6949  | 2 V.ICVAVGD chr5@1063   | 1.74E-10 | 0.005054 |
| 19July2011 | 716   | 522.8  | -6.43343 | 2 K.M+15.99 chr4@1097   | 1.15E-10 | 0.004315 |
| 19July2011 | 6797  | 599.62 | 1.63138  | 3 R.NAEEEAAI Splice@chr | 2.05E-11 | 4.07E-04 |
| 19July2011 | 7569  | 603.32 | -10.6063 | 3 K.LTKLNYI Splice@chr  | 1.17E-10 | 0.004315 |
| 19July2011 | 2523  | 544.79 | 1.908116 | 2 R.GTNVLVS Splice@chr  | 5.91E-11 | 0.00206  |
| 19July2011 | 2297  | 508.28 | 27.19313 | 2 R.MIESTGL Splice@chr  | 3.81E-10 | 0.008976 |
| 19July2011 | 2510  | 587.3  | 4.892896 | 2 Q.NAVEQE Splice@chr   | 7.97E-12 | 4.07E-04 |
| 19July2011 | 8560  | 897.42 | -27.6753 | 3 _QVREMH Splice@chr    | 1.18E-10 | 0.004315 |
| 19July2011 | 11845 | 737.36 | 7.484025 | 4 R.NAEEEAAI Splice@chr | 5.03E-12 | 4.07E-04 |
| 19July2011 | 4128  | 640.82 | -10.398  | 2 R.CKM+15. chr2@1043   | 1.05E-10 | 0.004207 |
| 19July2011 | 11145 | 664.7  | 1.197202 | 3 _PTLNK+1. chr1@6526   | 1.47E-10 | 0.004783 |
| 19July2011 | 5418  | 472.29 | -0.64754 | 2 _SPLFVPKI chrX@4402   | 3.73E-10 | 0.00885  |
| 19July2011 | 931   | 587.3  | 4.892896 | 2 Q.NAVEQE Splice@chr   | 2.58E-11 | 7.98E-04 |
| 19July2011 | 223   | 702.38 | 2.001521 | 1 _DAAGLAC chr3@2528    | 7.36E-11 | 0.003011 |
| 19July2011 | 1282  | 731.41 | -4.43201 | 1 _KDATAPK chr3@7059    | 2.61E-10 | 0.00605  |
| 19July2011 | 1656  | 526.79 | 15.09121 | 2 K.KLDLNM chr2@7182    | 1.14E-10 | 0.003011 |
| 19July2011 | 9532  | 703.08 | -22.8155 | 3 K.LTK+14.0 chr5@3843  | 2.87E-10 | 0.007229 |
| 19July2011 | 790   | 401.23 | 6.55768  | 2 R.IEAGGGC chr5@8776   | 4.70E-12 | 2.82E-04 |
| 19July2011 | 44    | 511.24 | 12.68013 | 3 R.GGDGGA chr3@2778    | 1.36E-15 | 0        |
| 19July2011 | 7087  | 664.7  | 1.197202 | 3 _PTLNK+1. chr1@6526   | 1.54E-10 | 0.00339  |
| 19July2011 | 874   | 587.3  | 4.892896 | 2 Q.NAVEQE Splice@chr   | 1.41E-11 | 5.48E-04 |
| 19July2011 | 4484  | 509.3  | -20.473  | 2 R.SSVIMLIV chr2@5767  | 1.98E-10 | 0.00461  |
| 19July2011 | 3595  | 565.32 | -20.5497 | 2 _KQREKER chr2@1038    | 2.78E-10 | 0.006667 |
| 19July2011 | 991   | 544.79 | 1.908116 | 2 R.GTNVLVS Splice@chr  | 2.88E-10 | 0.007229 |
| 19July2011 | 9714  | 504.78 | 6.126659 | 2 R.FPANFRC chr5@2004   | 3.56E-10 | 0.00823  |
| 19July2011 | 974   | 412.23 | 25.3069  | 2 R.IASYQGG chrX@1679   | 4.67E-11 | 0.002007 |
| 19July2011 | 3620  | 471.79 | -5.7044  | 2 K.IKVNFPPI chr2@3034  | 3.67E-10 | 0.009074 |
| 19July2011 | 13807 | 787.89 | 24.95531 | 2 K.FWREIQM chrX@1650   | 2.55E-10 | 0.006287 |
| 19July2011 | 6938  | 603.32 | -10.6063 | 3 K.LTKLNYI Splice@chr  | 3.09E-10 | 0.008263 |
| 19July2011 | 10514 | 555.97 | 19.65028 | 3 K.M+15.99 chr5@1600   | 1.55E-10 | 0.003217 |
| 19July2011 | 8538  | 515.62 | -18.8182 | 3 K.ILKIK+14. chr2@1445 | 2.48E-10 | 0.006146 |
| 19July2011 | 9754  | 675.36 | -25.704  | 2 E.ELPELGFI chr1@1059  | 2.85E-10 | 0.0072   |
| 19July2011 | 2263  | 412.23 | 25.3069  | 2 R.IASYQGG chrX@1679   | 3.03E-11 | 0.001891 |
| 19July2011 | 3055  | 469.58 | -0.34735 | 3 K.QALCSMI chrX@8031   | 2.17E-10 | 0.004859 |
| 19July2011 | 11989 | 988.05 | 18.46899 | 2 K.FDYFNMI chr4@1602   | 2.42E-10 | 0.005783 |
| 19July2011 | 1612  | 693.35 | -21.8626 | 2 P.CRAWHT chr1@4780    | 1.69E-10 | 0.003574 |
| 19July2011 | 6883  | 603.65 | -17.9349 | 3 K.LTKLNYI Splice@chr  | 1.04E-10 | 0.00252  |
| 19July2011 | 6784  | 603.32 | -10.6063 | 3 K.LTKLNYI Splice@chr  | 3.74E-10 | 0.009591 |
| 19July2011 | 10290 | 685.88 | 4.188613 | 2 K.IVPGGGA chrX@1570   | 3.10E-15 | 0        |
| 19July2011 | 2217  | 587.3  | 4.892896 | 2 Q.NAVEQE Splice@chr   | 5.59E-12 | 0        |

|            |       |        |          |                          |          |          |
|------------|-------|--------|----------|--------------------------|----------|----------|
| 19July2011 | 5260  | 588.29 | -10.2888 | 2 R.QIDKLEN chr5@2475    | 1.21E-11 | 5.09E-04 |
| 19July2011 | 13753 | 787.89 | 24.95531 | 2 K.FWREIQM chrX@1650    | 1.08E-11 | 5.09E-04 |
| 19July2011 | 197   | 580.81 | 18.10659 | 2 R.KVQESSP chr2@1131    | 1.90E-10 | 0.005685 |
| 19July2011 | 1029  | 412.23 | 25.3069  | 2 R.IASYQGG chrX@1675    | 2.95E-10 | 0.008841 |
| 19July2011 | 7307  | 689.72 | 5.081029 | 3 K.FK+14.01 Splice@chr  | 2.76E-10 | 0.008173 |
| 19July2011 | 5487  | 564.66 | 11.76712 | 3 K.PEIEISIKI Splice@chr | 3.89E-11 | 0.002558 |
| 19July2011 | 5633  | 671.37 | -24.0361 | 2 T.FNIVHTQ Splice@chr   | 1.91E-10 | 0.005929 |
| 19July2011 | 421   | 577.79 | 14.81504 | 2 K.MMTVTE chrX@2095     | 2.93E-10 | 0.008841 |
| 19July2011 | 7270  | 515.3  | 13.29211 | 3 K.PNFTVILS chr4@1642   | 2.96E-10 | 0.008841 |
| 19July2011 | 1636  | 460.25 | 8.040761 | 2 _._ATDGSSII chr5@1148  | 6.82E-11 | 0.003178 |
| 19July2011 | 931   | 587.3  | 4.892896 | 2 Q.NAVEQE Splice@chr    | 1.29E-11 | 0.001285 |
| 19July2011 | 1579  | 460.25 | 8.040761 | 2 _._ATDGSSII chr5@1148  | 1.81E-10 | 0.005458 |
| 19July2011 | 9611  | 787.88 | 12.22608 | 2 K.FWREIQM chrX@1650    | 2.45E-10 | 0.007743 |
| 19July2011 | 971   | 412.23 | 25.3069  | 2 R.IASYQGG chrX@1675    | 3.07E-11 | 0.002332 |
| 19July2011 | 6788  | 994.84 | -20.7023 | 3 K.SQVFSTA chrX@6085    | 8.92E-12 | 6.62E-04 |
| 19July2011 | 7346  | 689.72 | 5.081029 | 3 K.FK+14.01 Splice@chr  | 4.79E-11 | 0.00307  |
| 19July2011 | 9831  | 504.78 | 6.126659 | 2 R.FPANFRC chr5@2004    | 1.84E-10 | 0.005901 |
| 19July2011 | 7809  | 757.43 | 9.360043 | 2 F.QVFENV\ chr3@8444    | 1.33E-10 | 0.005385 |
| 19July2011 | 2375  | 454.75 | 8.810814 | 2 K.TDLAYLG chr4@1545    | 1.05E-10 | 0.004495 |
| 19July2011 | 5414  | 472.29 | -0.64754 | 2 _._SPLFVPKI chrX@4402  | 2.61E-10 | 0.008339 |
| 19July2011 | 7098  | 683.37 | 23.88288 | 2 K.FWNVLEI chr3@1304    | 3.87E-11 | 0.002613 |
| 19July2011 | 198   | 702.38 | 2.001521 | 1 _._DAAGLAC chr3@2528   | 5.12E-12 | 6.46E-04 |
| 19July2011 | 6310  | 675.36 | -25.704  | 2 E.ELPELGFI chr1@1055   | 2.80E-10 | 0.008968 |
| 19July2011 | 3457  | 560.82 | 28.56613 | 2 R.PDFSLNS chr3@3320    | 4.32E-11 | 0.00307  |
| 19July2011 | 5301  | 472.29 | -0.64754 | 2 _._SPLFVPKI chrX@4402  | 1.35E-10 | 0.005505 |
| 19July2011 | 3691  | 713.38 | -5.39773 | 2 L.QMTMAC chr4@7860     | 2.96E-10 | 0.009303 |
| 19July2011 | 748   | 587.3  | 4.892896 | 2 Q.NAVEQE Splice@chr    | 1.18E-11 | 0.002018 |
| 19July2011 | 2829  | 673.33 | 11.76686 | 2 R.QEM+15 chr3@1026     | 1.87E-10 | 0.006125 |
| 19July2011 | 10037 | 504.78 | 6.126659 | 2 R.FPANFRC chr5@2004    | 8.85E-11 | 0.002997 |
| 19July2011 | 2174  | 554.29 | -10.7634 | 2 _._SSLDKESC chr5@1235  | 1.05E-10 | 0.003035 |
| 19July2011 | 2504  | 454.75 | 8.810814 | 2 K.TDLAYLG chr4@1545    | 1.05E-10 | 0.003035 |
| 19July2011 | 5608  | 472.29 | -0.64754 | 2 _._SPLFVPKI chrX@4402  | 1.30E-10 | 0.003035 |
| 19July2011 | 7608  | 515.63 | 4.709014 | 3 K.PNFTVILS chr4@1642   | 1.47E-10 | 0.003035 |
| 19July2011 | 1350  | 731.41 | -4.43201 | 1 _._KDATAPK chr3@7055   | 1.18E-10 | 0.003035 |
| 19July2011 | 9319  | 665.37 | -26.6417 | 2 Q.INNK+14 Splice@chr   | 5.86E-11 | 0.002156 |
| 19July2011 | 1957  | 685.85 | -4.99086 | 2 R.PTCVQKA chr5@1902    | 3.58E-10 | 0.007559 |
| 19July2011 | 9648  | 855.48 | -6.07153 | 2 K.IFTQTK+1 Splice@chr  | 3.44E-10 | 0.007559 |
| 19July2011 | 5555  | 472.29 | -0.64754 | 2 _._SPLFVPKI chrX@4402  | 1.30E-10 | 0.003035 |
| 19July2011 | 1029  | 412.23 | 25.3069  | 2 R.IASYQGG chrX@1675    | 6.77E-11 | 0.002353 |
| 19July2011 | 50    | 511.24 | 12.68013 | 3 R.GGDGGA chr3@2778     | 9.98E-15 | 0        |
| 19July2011 | 10221 | 787.88 | 12.22608 | 2 K.FWREIQM chrX@1650    | 7.17E-11 | 0.002353 |
| 19July2011 | 5731  | 564.66 | 11.76712 | 3 K.PEIEISIKI Splice@chr | 3.27E-10 | 0.006766 |
| 19July2011 | 234   | 702.38 | 2.001521 | 1 _._DAAGLAC chr3@2528   | 5.12E-12 | 5.76E-04 |
| 19July2011 | 2279  | 471.79 | -5.7044  | 2 K.IKVNFPPI chr2@3034   | 3.16E-10 | 0.008345 |
| 19July2011 | 1306  | 412.23 | 25.3069  | 2 R.IASYQGG chrX@1675    | 1.89E-10 | 0.00523  |
| 19July2011 | 6227  | 472.29 | -0.64754 | 2 _._SPLFVPKI chrX@4402  | 3.92E-10 | 0.009989 |
| 19July2011 | 11230 | 787.88 | 12.22608 | 2 K.FWREIQM chrX@1650    | 3.42E-10 | 0.009007 |

|            |       |        |          |                          |          |          |
|------------|-------|--------|----------|--------------------------|----------|----------|
| 19July2011 | 7137  | 765.87 | 13.40639 | 2 K.SDGVDV\$ chr3@5860   | 2.01E-11 | 0.00159  |
| 19July2011 | 3393  | 558.3  | -2.40945 | 2 R.LEIDSSNI Splice@chr  | 1.03E-11 | 9.67E-04 |
| 19July2011 | 11616 | 634.32 | -15.8694 | 3 _ .FERSNNII chr4@1114  | 2.38E-11 | 0.00159  |
| 19July2011 | 8153  | 666.04 | -26.4313 | 3 K.LVNNNIK chr4@1598    | 2.78E-11 | 0.001798 |
| 19July2011 | 6116  | 472.29 | -0.64754 | 2 _ .SPLFVPKf chrX@4402  | 1.30E-10 | 0.004696 |
| 19July2011 | 4925  | 603.65 | -17.9349 | 3 K.LTKLNYI Splice@chr   | 2.64E-10 | 0.006803 |
| 19July2011 | 2407  | 793.93 | -3.84873 | 2 R.TK+14.01 chr1@7238   | 7.48E-11 | 0.004325 |
| 19July2011 | 9406  | 988.05 | 18.46899 | 2 K.FDYFNMI chr4@1602    | 9.03E-11 | 0.004696 |
| 19July2011 | 1235  | 429.75 | -27.8303 | 2 K.KGGVAS/ chr5@3587    | 2.33E-10 | 0.005936 |
| 19July2011 | 8652  | 736.36 | -26.2277 | 2 K.M+15.99 chr1@1374    | 3.06E-11 | 0.002219 |
| 19July2011 | 1208  | 587.3  | 4.892896 | 2 Q.NAVEQE Splice@chr    | 7.54E-12 | 7.59E-04 |
| 19July2011 | 6929  | 924.41 | -11.8314 | 2 Q.KPDDISN Splice@chr   | 2.34E-10 | 0.005936 |
| 19July2011 | 6341  | 564.66 | 11.76712 | 3 K.PEIEISIKI Splice@chr | 3.15E-10 | 0.008345 |
| 19July2011 | 767   | 632.78 | -25.4076 | 2 _ .KM+15.9 Splice@chr  | 1.19E-10 | 0.004132 |
| 19July2011 | 9689  | 803.91 | -0.22805 | 2 R.KMFPENI chr2@3989    | 2.86E-11 | 8.60E-04 |
| 19July2011 | 1319  | 429.75 | -27.8303 | 2 K.KGGVAS/ chr5@3587    | 2.39E-10 | 0.005666 |
| 19July2011 | 8586  | 555.97 | 19.65028 | 3 K.M+15.99 chr5@1600    | 1.05E-10 | 0.003801 |
| 19July2011 | 1420  | 412.23 | 25.3069  | 2 R.IASYQGG chrX@1679    | 1.87E-10 | 0.005229 |
| 19July2011 | 1287  | 587.3  | 4.892896 | 2 Q.NAVEQE Splice@chr    | 1.35E-11 | 2.27E-04 |
| 19July2011 | 6911  | 472.29 | -0.64754 | 2 _ .SPLFVPKf chrX@4402  | 3.88E-10 | 0.007978 |
| 19July2011 | 10101 | 902.46 | -21.5757 | 3 K.RKLEYTIS Splice@chr  | 6.44E-11 | 0.002572 |
| 19July2011 | 7765  | 765.86 | 0.3192   | 2 K.SDGVDV\$ chr3@5860   | 4.92E-13 | 0        |
| 19July2011 | 9293  | 571.64 | -12.8771 | 3 R.IAEEKK+1 chr1@2921   | 1.29E-10 | 0.004289 |
| 19July2011 | 655   | 578.29 | 11.9068  | 2 K.MMTVTE chrX@2095     | 5.71E-11 | 0.002572 |
| 19July2011 | 2093  | 439.23 | -12.3957 | 2 R.IDDKTSAI chr5@8738   | 1.75E-10 | 0.005229 |
| 19July2011 | 2099  | 433.76 | 2.609238 | 2 _ .IVDLPGPI chr3@1104  | 3.27E-11 | 0.001052 |
| 19July2011 | 7711  | 766.36 | -1.8739  | 2 K.SDGVDV\$ chr3@5860   | 5.01E-13 | 0        |
| 19July2011 | 6620  | 472.29 | -0.64754 | 2 _ .SPLFVPKf chrX@4402  | 1.30E-10 | 0.004289 |
| 19July2011 | 11692 | 504.78 | 6.126659 | 2 R.FPANFRC chr5@2004    | 8.63E-11 | 0.003447 |
| 19July2011 | 7542  | 924.41 | -11.8314 | 2 Q.KPDDISN Splice@chr   | 3.41E-10 | 0.006695 |
| 19July2011 | 6943  | 564.66 | 11.76712 | 3 K.PEIEISIKI Splice@chr | 1.44E-10 | 0.004444 |
| 19July2011 | 7221  | 808.93 | -6.19472 | 2 K.NFVPGN\$ chr5@1371   | 3.77E-10 | 0.007978 |
| 19July2011 | 8906  | 515.29 | -6.17134 | 3 K.PNFTVILS chr4@1642   | 3.66E-10 | 0.007515 |
| 19July2011 | 5282  | 550.82 | 20.90876 | 4 R.HSSGLKM chr5@1455    | 2.18E-10 | 0.004634 |
| 19July2011 | 4883  | 703.87 | 11.02855 | 2 Y.VVQVAID chr1@1045    | 1.49E-11 | 2.74E-04 |
| 19July2011 | 4517  | 603.32 | -10.6063 | 3 K.LTKLNYI Splice@chr   | 5.43E-11 | 7.76E-04 |
| 19July2011 | 6049  | 536.33 | -14.5938 | 2 A.VLLWRLS chr3@5495    | 2.21E-10 | 0.004835 |
| 19July2011 | 1157  | 412.23 | 25.3069  | 2 R.IASYQGG chrX@1679    | 1.75E-10 | 0.0033   |
| 19July2011 | 7064  | 664.7  | 1.197202 | 3 _ .PTLNK+1. chr1@6526  | 2.63E-10 | 0.005218 |
| 19July2011 | 6126  | 859.14 | 2.870693 | 3 _ .LRFKDNC chrX@1055   | 3.52E-10 | 0.00621  |
| 19July2011 | 3183  | 558.3  | -2.40945 | 2 R.LEIDSSNI Splice@chr  | 3.90E-10 | 0.006412 |
| 19July2011 | 6026  | 631.33 | -21.7867 | 4 R.MTSGK+ Splice@chr    | 3.85E-10 | 0.006412 |
| 19July2011 | 5146  | 673.32 | -23.1345 | 4 _ .QVREMH Splice@chr   | 1.52E-10 | 0.002842 |
| 19July2011 | 5549  | 515.62 | -18.8182 | 3 K.ILKIK+14. chr2@1445  | 4.27E-10 | 0.007234 |
| 19July2011 | 5571  | 472.29 | -0.64754 | 2 _ .SPLFVPKf chrX@4402  | 2.74E-10 | 0.005414 |
| 19July2011 | 1108  | 587.3  | 4.892896 | 2 Q.NAVEQE Splice@chr    | 9.16E-12 | 2.74E-04 |
| 19July2011 | 1107  | 735.33 | -27.5112 | 2 K.YGHANVI chr1@1065    | 2.25E-10 | 0.004835 |

|            |      |        |          |                          |          |          |
|------------|------|--------|----------|--------------------------|----------|----------|
| 19July2011 | 6561 | 675.36 | -25.704  | 2 E.ELPELGFI chr1@1059   | 5.01E-10 | 0.009534 |
| 19July2011 | 2803 | 693.87 | -6.6949  | 2 V.ICVAVGD chr5@1063    | 2.05E-10 | 0.004426 |
| 19July2011 | 161  | 522.8  | -6.43343 | 2 K.M+15.99 chr4@1097    | 7.48E-11 | 0.001023 |
| 19July2011 | 7418 | 735.06 | 10.34389 | 3 R.WQHALP chr4@7817     | 1.42E-10 | 0.002842 |
| 19July2011 | 558  | 562.31 | -13.4391 | 2 R.FYLLYLYK Splice@chr  | 4.72E-11 | 7.76E-04 |
| 19July2011 | 7012 | 685.88 | 4.188613 | 2 K.IVPGGGA chrX@1570    | 7.39E-14 | 0        |
| 19July2011 | 6004 | 786.92 | 29.30871 | 4 _EISCHLK+ chr4@7011    | 4.24E-10 | 0.009202 |
| 19July2011 | 7106 | 735.06 | 10.34389 | 3 R.WQHALP chr4@7817     | 1.48E-10 | 0.004537 |
| 19July2011 | 37   | 511.24 | 12.68013 | 3 R.GGDGGA chr3@2778     | 6.25E-15 | 0        |
| 19July2011 | 1831 | 519.6  | -26.5197 | 3 K.IGSM+15 chr5@1654    | 8.90E-11 | 0.003494 |
| 19July2011 | 1367 | 469.58 | -0.34735 | 3 K.QALCSMI chrX@8031    | 1.59E-10 | 0.004757 |
| 19July2011 | 129  | 522.8  | -6.43343 | 2 K.M+15.99 chr4@1097    | 3.22E-10 | 0.007366 |
| 19July2011 | 3000 | 601.79 | -1.62548 | 2 K.YGATRFS chrX@6172    | 1.60E-10 | 0.004955 |
| 19July2011 | 6535 | 622.7  | -11.061  | 3 P.RNWGKG chrX@1446     | 3.93E-10 | 0.008355 |
| 19July2011 | 6700 | 685.88 | 4.188613 | 2 K.IVPGGGA chrX@1570    | 1.13E-13 | 0        |
| 19July2011 | 7763 | 740.42 | -24.9849 | 2 _DKLK+14. chr4@7174    | 2.94E-10 | 0.007009 |
| 19July2011 | 6554 | 563.27 | -13.5689 | 2 K.MSARNYI chrX@1045    | 3.62E-10 | 0.008193 |
| 19July2011 | 6570 | 484.61 | 1.222351 | 3 K.ISSAIAMF Splice@chr  | 3.47E-10 | 0.007366 |
| 19July2011 | 400  | 562.31 | -13.4391 | 2 R.FYLLYLYK Splice@chr  | 6.40E-11 | 0.003297 |
| 19July2011 | 888  | 432.22 | 23.49673 | 2 _LPMMESI Splice@chr    | 1.85E-10 | 0.00511  |
| 19July2011 | 5319 | 472.29 | -0.64754 | 2 _SPLFVPKF chrX@4402    | 2.64E-10 | 0.006139 |
| 19July2011 | 4629 | 703.87 | 11.02855 | 2 Y.VVQVAID chr1@1043    | 1.11E-10 | 0.003914 |
| 19July2011 | 4633 | 931.78 | -28.5023 | 3 _VFGGK+1 chr5@3050     | 1.58E-10 | 0.004757 |
| 19July2011 | 9223 | 703.08 | -22.8155 | 3 K.LTK+14.0 chr5@3843   | 1.09E-10 | 0.003914 |
| 19July2011 | 3620 | 462.59 | 1.368923 | 3 K.RRYDYGK chr5@9435    | 4.69E-11 | 0.002362 |
| 19July2011 | 6749 | 685.88 | 4.188613 | 2 K.IVPGGGA chrX@1570    | 2.01E-15 | 0        |
| 19July2011 | 757  | 401.23 | 6.55768  | 2 R.IEAGGGC chr5@8776    | 2.11E-10 | 0.005339 |
| 19July2011 | 982  | 412.23 | 25.3069  | 2 R.IASYQGG chrX@1679    | 2.99E-10 | 0.007009 |
| 19July2011 | 6813 | 555.97 | 19.65028 | 3 K.M+15.99 chr5@1600    | 1.81E-10 | 0.00511  |
| 19July2011 | 985  | 412.23 | 25.3069  | 2 R.IASYQGG chrX@1679    | 3.41E-11 | 8.44E-04 |
| 19July2011 | 960  | 587.3  | 4.892896 | 2 Q.NAVEQE Splice@chr    | 9.14E-11 | 0.002333 |
| 19July2011 | 1613 | 460.25 | 8.040761 | 2 _ATDGSSII chr5@1148    | 7.59E-12 | 4.80E-04 |
| 19July2011 | 6249 | 671.37 | -24.0361 | 2 T.FNIVHTQ Splice@chr   | 2.22E-10 | 0.005817 |
| 19July2011 | 968  | 429.75 | -27.8303 | 2 K.KGGVASA chr5@3587    | 1.04E-11 | 6.55E-04 |
| 19July2011 | 9417 | 793.73 | -10.7571 | 3 R.GETFRVE chr1@5144    | 1.27E-10 | 0.003234 |
| 19July2011 | 7124 | 765.87 | 13.40639 | 2 K.SDGVDV chr3@5860     | 8.86E-11 | 0.002333 |
| 19July2011 | 1113 | 587.3  | 4.892896 | 2 Q.NAVEQE Splice@chr    | 5.37E-12 | 2.31E-04 |
| 19July2011 | 4384 | 421.25 | 28.95162 | 3 _EIVGMPA chr5@4046     | 1.75E-10 | 0.004153 |
| 19July2011 | 986  | 409.74 | -10.6768 | 2 K.MVITNLK Splice@chr   | 2.70E-10 | 0.005399 |
| 19July2011 | 2457 | 519.6  | -26.5197 | 3 K.IGSM+15 chr5@1654    | 3.32E-10 | 0.006527 |
| 19July2011 | 1178 | 412.23 | 25.3069  | 2 R.IASYQGG chrX@1679    | 3.41E-11 | 8.14E-04 |
| 19July2011 | 6498 | 564.66 | 11.76712 | 3 K.PEIEISIKI Splice@chr | 2.07E-11 | 8.14E-04 |
| 19July2011 | 5076 | 603.32 | -10.6063 | 3 K.LTKLNYI Splice@chr   | 6.78E-11 | 0.001352 |
| 19July2011 | 7084 | 924.41 | -11.8314 | 2 Q.KPDDISN Splice@chr   | 2.16E-10 | 0.004955 |
| 19July2011 | 3781 | 696.83 | -11.9803 | 2 R.TDRTESV chr1@1452    | 2.06E-10 | 0.004955 |
| 19July2011 | 8023 | 664.7  | 1.197202 | 3 _PTLNK+1. chr1@6526    | 3.98E-10 | 0.00845  |
| 19July2011 | 6158 | 472.29 | -0.64754 | 2 _SPLFVPKF chrX@4402    | 1.35E-10 | 0.003294 |

|            |       |        |          |                          |          |          |
|------------|-------|--------|----------|--------------------------|----------|----------|
| 19July2011 | 6443  | 472.29 | -0.64754 | 2 _SPLFVPKf chrX@440     | 1.38E-10 | 0.003294 |
| 19July2011 | 5657  | 897.42 | -27.6753 | 3 _QVREMH Splice@chr     | 3.46E-10 | 0.006667 |
| 19July2011 | 11900 | 792.15 | -18.5783 | 4 K.SGTIFDNI Splice@chr  | 1.48E-11 | 6.45E-04 |
| 19July2011 | 2420  | 793.42 | 19.33353 | 2 R.NEKYSTM Splice@chr   | 4.29E-10 | 0.008713 |
| 19July2011 | 11948 | 792.15 | -18.5783 | 4 K.SGTIFDNI Splice@chr  | 1.37E-10 | 0.003294 |
| 19July2011 | 9180  | 934.16 | 0.08721  | 3 K.LNILLDAF chr1@232    | 3.06E-10 | 0.005865 |
| 19July2011 | 5020  | 603.32 | -10.6063 | 3 K.LTKLNYYI Splice@chr  | 1.92E-11 | 8.14E-04 |
| 19July2011 | 6049  | 667.68 | 25.75728 | 3 K.LTVCQM- chr5@363     | 2.62E-10 | 0.007031 |
| 19July2011 | 7626  | 664.7  | 1.197202 | 3 _PTLNK+1- chr1@652     | 3.51E-11 | 0.001079 |
| 19July2011 | 2666  | 693.87 | -6.6949  | 2 V.ICVAVGD chr5@106     | 8.56E-12 | 2.46E-04 |
| 19July2011 | 7413  | 685.88 | 4.188613 | 2 K.IVPGGGA chrX@157     | 2.37E-11 | 8.92E-04 |
| 19July2011 | 7744  | 664.7  | 1.197202 | 3 _PTLNK+1- chr1@652     | 7.13E-11 | 0.002262 |
| 19July2011 | 1308  | 474.27 | 23.04782 | 2 _VEARSTG chr5@116      | 4.09E-11 | 0.001079 |
| 19July2011 | 2721  | 693.87 | -6.6949  | 2 V.ICVAVGD chr5@106     | 1.59E-10 | 0.005008 |
| 19July2011 | 2134  | 594.81 | -21.482  | 2 K.INGTEKN chrX@695     | 6.35E-11 | 0.002262 |
| 19July2011 | 5881  | 515.62 | -18.8182 | 3 K.ILKIK+14- chr2@144   | 1.52E-10 | 0.005008 |
| 19July2011 | 7908  | 735.06 | 10.34389 | 3 R.WQHALP chr4@781      | 8.98E-11 | 0.002421 |
| 19July2011 | 10641 | 504.78 | 6.126659 | 2 R.FPANFRC chr5@200     | 3.44E-10 | 0.009261 |
| 19July2011 | 9849  | 840.45 | 15.70543 | 2 K.FANRQIA chr2@429     | 1.58E-10 | 0.005008 |
| 19July2011 | 7249  | 563.28 | 4.233503 | 2 K.MSARNYI chrX@104     | 2.35E-10 | 0.006912 |
| 19July2011 | 8959  | 876.51 | -18.0997 | 2 K.NQAIQNI chr2@918     | 8.61E-11 | 0.002421 |
| 19July2011 | 10413 | 703.08 | -22.8155 | 3 K.LTK+14.0 chr5@384    | 3.54E-10 | 0.009432 |
| 19July2011 | 1642  | 403.22 | -14.6688 | 3 R.FSAIRDVI chr1@233    | 1.49E-10 | 0.005008 |
| 19July2011 | 10685 | 504.78 | 6.126659 | 2 R.FPANFRC chr5@200     | 1.39E-10 | 0.004274 |
| 19July2011 | 7471  | 685.88 | 4.188613 | 2 K.IVPGGGA chrX@157     | 6.71E-18 | 0        |
| 19July2011 | 7024  | 660.37 | -16.199  | 2 K.TK+14.01 chr1@142    | 8.17E-11 | 0.002421 |
| 19July2011 | 5341  | 673.32 | -23.1345 | 4 _QVREMH Splice@chr     | 1.80E-10 | 0.005714 |
| 19July2011 | 7960  | 735.06 | 10.34389 | 3 R.WQHALP chr4@781      | 2.30E-10 | 0.006912 |
| 19July2011 | 5923  | 472.29 | -0.64754 | 2 _SPLFVPKf chrX@440     | 1.48E-10 | 0.003061 |
| 19July2011 | 9904  | 819.1  | -3.35779 | 3 R.ITSSSVKN chr2@668    | 2.53E-10 | 0.006069 |
| 19July2011 | 7504  | 664.7  | 1.197202 | 3 _PTLNK+1- chr1@652     | 3.01E-10 | 0.00771  |
| 19July2011 | 2135  | 793.42 | 19.33353 | 2 R.NEKYSTM Splice@chr   | 1.35E-10 | 0.002689 |
| 19July2011 | 6018  | 564.66 | 11.76712 | 3 K.PEIEISIKI Splice@chr | 5.68E-11 | 0.001545 |
| 19July2011 | 7189  | 563.28 | 4.233503 | 2 K.MSARNYI chrX@104     | 1.28E-10 | 0.002491 |
| 19July2011 | 1473  | 587.39 | -9.68006 | 2 K.KTIFPKK+ chr1@100    | 2.65E-10 | 0.006243 |
| 19July2011 | 6944  | 660.37 | -16.199  | 2 K.TK+14.01 chr1@142    | 7.39E-11 | 0.001923 |
| 19July2011 | 6979  | 947.99 | 2.64255  | 2 K.RKKEK+1- chr1@500    | 1.91E-10 | 0.004613 |
| 19July2011 | 7240  | 664.37 | 7.851479 | 3 _PTLNK+1- chr1@652     | 8.62E-11 | 0.001923 |
| 19July2011 | 5317  | 673.32 | -23.1345 | 4 _QVREMH Splice@chr     | 1.69E-10 | 0.003247 |
| 19July2011 | 7421  | 685.88 | 4.188613 | 2 K.IVPGGGA chrX@157     | 2.96E-15 | 0        |
| 19July2011 | 1320  | 731.41 | -4.43201 | 1 _KDATAPK chr3@705      | 1.18E-10 | 0.002491 |
| 19July2011 | 996   | 412.23 | 25.3069  | 2 R.IASYQGG chrX@167     | 3.07E-11 | 0.001154 |
| 19July2011 | 7615  | 664.7  | 1.197202 | 3 _PTLNK+1- chr1@652     | 2.41E-11 | 9.60E-04 |
| 19July2011 | 1930  | 471.79 | -5.7044  | 2 K.IKVNFPPi chr2@303    | 2.07E-10 | 0.00539  |
| 19July2011 | 10819 | 767.75 | -14.8381 | 3 K.TFLKNPK' chr3@104    | 2.70E-10 | 0.006815 |
| 19July2011 | 56    | 511.24 | 12.68013 | 3 R.GGDGGA chr3@277      | 4.39E-17 | 0        |
| 19July2011 | 8431  | 934.16 | 0.08721  | 3 K.LNILLDAF chr1@232    | 2.57E-10 | 0.006069 |

|            |       |         |          |                         |          |          |
|------------|-------|---------|----------|-------------------------|----------|----------|
| 19July2011 | 595   | 577.79  | 14.81504 | 2 K.MMTVTE chrX@2095    | 2.11E-10 | 0.005026 |
| 19July2011 | 8080  | 685.88  | 4.188613 | 2 K.IVPGGGA chrX@1570   | 1.95E-14 | 0        |
| 19July2011 | 8399  | 498.78  | 0.306542 | 2 R.FKQFAVE Splice@chr  | 1.41E-10 | 0.003114 |
| 19July2011 | 8346  | 498.78  | 0.306542 | 2 R.FKQFAVE Splice@chr  | 4.36E-10 | 0.009703 |
| 19July2011 | 7879  | 756.37  | -13.3372 | 3 _IPSAVGY( Splice@chr  | 1.34E-10 | 0.003114 |
| 19July2011 | 1300  | 412.23  | 25.3069  | 2 R.IASYQGG chrX@1675   | 1.71E-10 | 0.004089 |
| 19July2011 | 1236  | 735.33  | -27.5112 | 2 K.YGHANVI chr1@1065   | 1.44E-11 | 1.98E-04 |
| 19July2011 | 6297  | 472.29  | -0.64754 | 2 _SPLFVPKf chrX@4402   | 3.73E-10 | 0.008984 |
| 19July2011 | 11721 | 787.89  | 24.95531 | 2 K.FWREIQN chrX@1650   | 1.77E-10 | 0.004257 |
| 19July2011 | 1257  | 429.75  | -27.8303 | 2 K.KGGVAS/ chr5@3587   | 2.31E-10 | 0.005677 |
| 19July2011 | 11506 | 496.61  | 13.38286 | 3 K.NSHPHRS Splice@chr  | 4.20E-10 | 0.009554 |
| 19July2011 | 11986 | 747.89  | -10.8686 | 2 S.CSLCRSTF Splice@chr | 3.60E-10 | 0.008729 |
| 19July2011 | 11972 | 741.38  | -10.3871 | 2 K.KIFLQM+ chr2@1507   | 3.84E-10 | 0.008984 |
| 19July2011 | 8032  | 994.84  | -20.7023 | 3 K.SQVFSTA chrX@6085   | 7.70E-12 | 1.98E-04 |
| 19July2011 | 3075  | 693.87  | -6.6949  | 2 V.ICVAVGD chr5@1065   | 1.69E-10 | 0.004089 |
| 19July2011 | 6470  | 472.29  | -0.64754 | 2 _SPLFVPKf chrX@4402   | 1.30E-10 | 0.003114 |
| 19July2011 | 1957  | 433.76  | 2.609238 | 2 _IVDLPGPI chr3@1104   | 1.41E-10 | 0.003114 |
| 19July2011 | 617   | 562.31  | -13.4391 | 2 R.FYLLLYLK Splice@chr | 5.92E-11 | 9.27E-04 |
| 19July2011 | 7812  | 563.28  | 4.233503 | 2 K.MSARNYI chrX@1045   | 3.41E-10 | 0.008108 |
| 19July2011 | 10045 | 896.46  | -10.1945 | 2 _PYPPTDP chr2@1365    | 2.04E-10 | 0.005026 |
| 19July2011 | 6854  | 808.94  | 6.19472  | 2 K.NFVPGN5 chr5@1371   | 3.02E-10 | 0.0075   |
| 19July2011 | 791   | 454.25  | 21.70768 | 2 R.RSMRNSI chr5@1004   | 2.66E-10 | 0.006596 |
| 19July2011 | 9063  | 876.51  | -18.0997 | 2 K.NQAIQNI chr2@9182   | 3.78E-10 | 0.007224 |
| 19July2011 | 11269 | 1058.89 | -11.1544 | 3 R.LVLHQKL Splice@chr  | 4.33E-10 | 0.008675 |
| 19July2011 | 8742  | 762.4   | 0.669255 | 3 _FYSM+15 chrX@9985    | 2.45E-10 | 0.004812 |
| 19July2011 | 12249 | 641.67  | -29.3879 | 3 _NKCYRIF chrX@4691    | 1.61E-10 | 0.003848 |
| 19July2011 | 6081  | 472.29  | -0.64754 | 2 _SPLFVPKf chrX@4402   | 1.42E-10 | 0.003522 |
| 19July2011 | 7613  | 664.7   | 1.197202 | 3 _PTLNK+1 chr1@6526    | 4.73E-11 | 0.001422 |
| 19July2011 | 2981  | 558.3   | -2.40945 | 2 R.LEIDSSNI Splice@chr | 2.03E-10 | 0.004331 |
| 19July2011 | 963   | 412.23  | 25.3069  | 2 R.IASYQGG chrX@1675   | 3.67E-11 | 8.20E-04 |
| 19July2011 | 758   | 632.33  | 21.173   | 2 _KENEVEK Splice@chr   | 9.54E-11 | 0.002498 |
| 19July2011 | 44    | 511.24  | 12.68013 | 3 R.GGDGGA chr3@2778    | 8.88E-14 | 0        |
| 19July2011 | 7297  | 563.27  | -13.5689 | 2 K.MSARNYI chrX@1045   | 1.47E-10 | 0.003695 |
| 19July2011 | 5956  | 472.29  | -0.64754 | 2 _SPLFVPKf chrX@4402   | 1.43E-10 | 0.003522 |
| 19July2011 | 7740  | 682.88  | -29.0653 | 2 K.RIAQVSK chr4@1486   | 3.77E-10 | 0.007224 |
| 19July2011 | 2095  | 793.42  | 19.33353 | 2 R.NEKYSTN Splice@chr  | 1.17E-10 | 0.003015 |
| 19July2011 | 7665  | 664.7   | 1.197202 | 3 _PTLNK+1 chr1@6526    | 1.19E-10 | 0.003015 |
| 19July2011 | 10173 | 849.42  | 8.560987 | 2 Q.DSSYFVE Splice@chr  | 2.70E-10 | 0.005291 |
| 19July2011 | 8787  | 934.16  | 0.08721  | 3 K.LNILLDAF chr1@2327  | 3.65E-10 | 0.007224 |
| 19July2011 | 4701  | 603.31  | -27.225  | 3 K.LTKLNYI Splice@chr  | 1.03E-11 | 2.31E-04 |
| 19July2011 | 2744  | 587.3   | 4.892896 | 2 Q.NAVEQE Splice@chr   | 7.51E-11 | 0.003016 |
| 19July2011 | 13453 | 876.51  | -18.0997 | 2 K.NQAIQNI chr2@9182   | 5.85E-11 | 0.002565 |
| 19July2011 | 8978  | 472.29  | -0.64754 | 2 _SPLFVPKf chrX@4402   | 1.30E-10 | 0.00425  |
| 19July2011 | 16475 | 795.66  | -10.8901 | 4 K.SGTIFDNI Splice@chr | 4.14E-11 | 0.001714 |
| 19July2011 | 3722  | 433.76  | 2.609238 | 2 _IVDLPGPI chr3@1104   | 2.52E-11 | 7.86E-04 |
| 19July2011 | 4566  | 594.81  | -21.482  | 2 K.INGTEKN chrX@6958   | 4.82E-11 | 0.002242 |
| 19July2011 | 10698 | 766.37  | 11.2133  | 2 K.SDGVDV5 chr3@5860   | 9.21E-12 | 4.30E-04 |

|            |       |         |          |                          |          |          |
|------------|-------|---------|----------|--------------------------|----------|----------|
| 19July2011 | 14519 | 665.37  | 11.66767 | 2 R.NIEVSNN chr5@1857    | 3.03E-10 | 0.008978 |
| 19July2011 | 2105  | 454.25  | 21.70768 | 2 R.RSMRNSI chr5@1004    | 2.60E-10 | 0.00815  |
| 19July2011 | 14901 | 1003.19 | 17.13413 | 3 R.CWNRRA Splice@chr    | 2.49E-10 | 0.007391 |
| 19July2011 | 8330  | 703.87  | 11.02855 | 2 Y.VVQVAID chr1@1045    | 4.24E-13 | 0        |
| 19July2011 | 11893 | 858.48  | 6.006088 | 3 _LETGIIKP Splice@chr   | 1.97E-13 | 0        |
| 19July2011 | 5202  | 693.87  | -6.6949  | 2 V.ICVAVGD chr5@1065    | 3.31E-10 | 0.009075 |
| 19July2011 | 11150 | 563.27  | -13.5689 | 2 K.MSARNYI chrX@1045    | 2.72E-10 | 0.008425 |
| 19July2011 | 9155  | 472.29  | -0.64754 | 2 _SPLFVPKF chrX@4402    | 1.42E-10 | 0.00489  |
| 19July2011 | 12174 | 894     | -12.2343 | 2 _VETGIIKP Splice@chr   | 4.54E-12 | 0        |
| 19July2011 | 13081 | 934.16  | 0.08721  | 3 K.LNILLDAF chr1@2327   | 3.81E-10 | 0.009589 |
| 19July2011 | 519   | 511.57  | 3.948988 | 3 R.GGDGGA chr3@2778     | 1.66E-12 | 0        |
| 19July2011 | 10245 | 704.86  | 0.607012 | 2 _IVTESFIW chr3@1005    | 1.92E-10 | 0.006221 |
| 19July2011 | 846   | 522.8   | -6.43343 | 2 K.M+15.99 chr4@1097    | 3.25E-10 | 0.009075 |
| 19July2011 | 11842 | 858.48  | 6.006088 | 3 _LETGIIKP Splice@chr   | 2.55E-12 | 0        |
| 19July2011 | 9036  | 472.29  | -0.64754 | 2 _SPLFVPKF chrX@4402    | 1.35E-10 | 0.004572 |
| 19July2011 | 11673 | 685.88  | 4.188613 | 2 K.IVPGGGA chrX@1570    | 1.49E-15 | 0        |
| 19July2011 | 2800  | 587.3   | 4.892896 | 2 Q.NAVEQE Splice@chr    | 3.83E-11 | 0.001152 |
| 19July2011 | 14699 | 771.9   | 21.37763 | 2 R.NEK+14.( chr5@1885   | 3.87E-10 | 0.00974  |
| 19July2011 | 2820  | 735.33  | -27.5112 | 2 K.YGHANVI chr1@1065    | 2.11E-10 | 0.006349 |
| 19July2011 | 1891  | 562.31  | -13.4391 | 2 R.FYLLYLYK Splice@chr  | 6.40E-11 | 0.002724 |
| 19July2011 | 8933  | 897.42  | -27.6753 | 3 _QVREMH Splice@chr     | 3.80E-10 | 0.009589 |
| 19July2011 | 2277  | 793.42  | 19.33353 | 2 R.NEKYSTM Splice@chr   | 3.60E-10 | 0.008615 |
| 19July2011 | 7749  | 735.06  | 10.34389 | 3 R.WQHALP chr4@7817     | 2.06E-11 | 0.001087 |
| 19July2011 | 59    | 511.24  | 12.68013 | 3 R.GGDGGA chr3@2778     | 5.19E-14 | 0        |
| 19July2011 | 10220 | 504.78  | 6.126659 | 2 R.FPANFRC chr5@2004    | 9.06E-11 | 0.002607 |
| 19July2011 | 849   | 632.33  | 21.173   | 2 _KENEVEK Splice@chr    | 2.42E-10 | 0.006346 |
| 19July2011 | 7427  | 592.36  | -24.6673 | 2 K.LIKISTNA chr5@1997   | 5.66E-11 | 0.002479 |
| 19July2011 | 2777  | 423.56  | -8.1851  | 3 R.KSILMECI chr5@7134   | 2.52E-10 | 0.006752 |
| 19July2011 | 10257 | 504.78  | 6.126659 | 2 R.FPANFRC chr5@2004    | 1.51E-10 | 0.003888 |
| 19July2011 | 6931  | 1000.17 | -22.2213 | 3 K.SQVFSTA chrX@6089    | 5.69E-11 | 0.002479 |
| 19July2011 | 10643 | 741.38  | -10.3871 | 2 K.KIFLQM+ chr2@1507    | 1.54E-10 | 0.004319 |
| 19July2011 | 10038 | 703.08  | -22.8155 | 3 K.LTK+14.0 chr5@3845   | 3.61E-10 | 0.008615 |
| 19July2011 | 3596  | 611.32  | -24.901  | 2 K.KNNM+1 chr3@1247     | 2.33E-10 | 0.005926 |
| 19July2011 | 9958  | 896.5   | -24.0675 | 3 K.WRK+14. chr5@5291    | 2.32E-10 | 0.005926 |
| 19July2011 | 5356  | 897.42  | -27.6753 | 3 _QVREMH Splice@chr     | 2.74E-10 | 0.007097 |
| 19July2011 | 5939  | 564.66  | 11.76712 | 3 K.PEIEISIKI Splice@chr | 1.32E-12 | 3.51E-04 |
| 19July2011 | 1083  | 412.23  | 25.3069  | 2 R.IASYQGG chrX@1679    | 3.41E-10 | 0.008221 |
| 19July2011 | 7784  | 515.29  | -6.17134 | 3 K.PNFTVILS chr4@1642   | 2.55E-10 | 0.007097 |
| 19July2011 | 7666  | 894     | -12.2343 | 2 _VETGIIKP Splice@chr   | 2.49E-10 | 0.006752 |
| 19July2011 | 972   | 735.33  | -27.5112 | 2 K.YGHANVI chr1@1065    | 4.53E-11 | 0.001287 |
| 19July2011 | 5745  | 472.29  | -0.64754 | 2 _SPLFVPKF chrX@4402    | 3.73E-10 | 0.008981 |
| 19July2011 | 7719  | 894.5   | -14.1127 | 2 _VETGIIKP Splice@chr   | 5.25E-12 | 8.70E-04 |
| 19July2011 | 974   | 587.3   | 4.892896 | 2 Q.NAVEQE Splice@chr    | 1.03E-11 | 8.70E-04 |
| 19July2011 | 3787  | 588.29  | -10.2888 | 2 R.QIDKLEN chr5@2475    | 1.39E-10 | 0.003765 |
| 19July2011 | 6298  | 837.9   | 11.71382 | 2 V.ISTMTND chr2@4708    | 2.11E-10 | 0.005396 |
| 19July2011 | 5498  | 703.86  | -3.21304 | 2 Y.VVQVAID chr1@1045    | 8.18E-15 | 0        |
| 19July2011 | 5559  | 703.87  | 11.02855 | 2 Y.VVQVAID chr1@1045    | 1.56E-12 | 2.23E-04 |

|            |       |         |          |                         |          |          |
|------------|-------|---------|----------|-------------------------|----------|----------|
| 19July2011 | 3587  | 883.39  | -18.0533 | 2 R.CAYHGKS chr5@1262   | 1.24E-10 | 0.003241 |
| 19July2011 | 1179  | 735.33  | -27.5112 | 2 K.YGHANVI chr1@1065   | 2.11E-10 | 0.005396 |
| 19July2011 | 9659  | 902.46  | -21.5757 | 3 K.RKLEYTIS Splice@chr | 3.00E-10 | 0.007032 |
| 19July2011 | 1893  | 702.88  | -28.6961 | 2 P.NRNISVT chrX@2185   | 4.23E-10 | 0.009436 |
| 19July2011 | 9095  | 772.1   | -15.8306 | 3 I.KNEFNK+ chr5@1150   | 2.17E-10 | 0.005396 |
| 19July2011 | 8068  | 599.3   | 8.059299 | 2 R.ECLSFASI chrX@7135  | 3.83E-10 | 0.009589 |
| 16Mar2011  | 21146 | 928     | -16.8303 | 2 _K+14.016 chr4@7947   | 2.70E-10 | 0.006    |
| 16Mar2011  | 5276  | 446.26  | -3.28991 | 2 K.KEISTSVK chr3@6800  | 4.49E-10 | 0.009802 |
| 19July2011 | 798   | 490.76  | 7.041338 | 2 K.VNEFEKS Splice@chr  | 3.14E-10 | 0.007796 |
| 16Mar2011  | 14918 | 893.44  | -17.3029 | 2 T.LEVTWM Splice@chr   | 2.26E-10 | 0.004133 |
| 16Mar2011  | 3578  | 453.24  | -13.5637 | 2 R.VGYPNIS chr1@1286   | 1.75E-10 | 0.004253 |
| 16Mar2011  | 279   | 601.79  | -7.00986 | 2 R.EDQVLEV Splice@chr  | 1.83E-10 | 0.004117 |
| 16Mar2011  | 14980 | 953.01  | -6.57382 | 2 R.K+14.016 chr1@9806  | 3.33E-10 | 0.007575 |
| 16Mar2011  | 5757  | 621.35  | -10.134  | 2 R.QIWKKTF chr4@4771   | 2.80E-10 | 0.006645 |
| 19July2011 | 9037  | 932.16  | 10.74999 | 3 K.QK+14.0 chr5@1576   | 1.27E-10 | 0.00317  |
| 19July2011 | 6520  | 652.33  | -7.82908 | 2 _MQM+15 chr4@1195     | 2.41E-10 | 0.005807 |
| 19July2011 | 4997  | 496.57  | -16.1752 | 3 R.CGCHQT chr1@5777    | 3.58E-10 | 0.008131 |
| 16Mar2011  | 8237  | 464.57  | 27.18889 | 3 R.FDETGAS Splice@chr  | 2.62E-10 | 0.005792 |
| 16Mar2011  | 19655 | 1027.48 | -16.0083 | 1 R.LKSCEDFI Splice@chr | 1.03E-10 | 0.001904 |
| 19July2011 | 3323  | 691.82  | 3.847707 | 2 _YRIEEEE chr2@5188    | 9.74E-11 | 0.003914 |
| 16Mar2011  | 5303  | 417.22  | 24.63685 | 2 K.SVENSAA chr2@1335   | 1.35E-10 | 0.003864 |
| 16Mar2011  | 14217 | 572.29  | -17.3076 | 3 K.KASFEIV chrX@1609   | 4.82E-10 | 0.00607  |
| 16Mar2011  | 12146 | 572.29  | -17.3076 | 3 K.KASFEIV chrX@1609   | 1.45E-10 | 0.002887 |
| 16Mar2011  | 3388  | 514.28  | 22.95089 | 2 K.MFINFDII chr1@4215  | 3.84E-10 | 0.009916 |
| 19July2011 | 8153  | 619.78  | -0.96125 | 4 R.NPSSPQS chr1@1465   | 1.59E-10 | 0.005054 |
| 16Mar2011  | 5078  | 569.31  | -1.39575 | 3 K.KTKNDEE chr3@5896   | 3.46E-10 | 0.008262 |
| 17Dec2011  | 6571  | 752.38  | -7.22956 | 2 R.LVVYGAN Splice@chr  | 1.83E-14 | 0        |
| 17Dec2011  | 4035  | 752.39  | 6.092325 | 2 R.LVVYGAN Splice@chr  | 3.01E-15 | 0        |
| 17Dec2011  | 4833  | 752.39  | 6.092325 | 2 R.LVVYGAN Splice@chr  | 4.72E-15 | 0        |
| 17Dec2011  | 4808  | 752.38  | -7.22956 | 2 R.LVVYGAN Splice@chr  | 7.12E-15 | 0        |
| 17Dec2011  | 5010  | 752.39  | 6.092325 | 2 R.LVVYGAN Splice@chr  | 4.99E-17 | 0        |
| 17Dec2011  | 5043  | 752.39  | 6.092325 | 2 R.LVVYGAN Splice@chr  | 1.92E-17 | 0        |
| 17Dec2011  | 6719  | 752.39  | 6.092325 | 2 R.LVVYGAN Splice@chr  | 9.88E-19 | 0        |
| 17Dec2011  | 6755  | 752.39  | 6.092325 | 2 R.LVVYGAN Splice@chr  | 1.68E-15 | 0        |
| 17Dec2011  | 4398  | 752.39  | 6.092325 | 2 R.LVVYGAN Splice@chr  | 1.88E-15 | 0        |
| 17Dec2011  | 4422  | 752.39  | 6.092325 | 2 R.LVVYGAN Splice@chr  | 3.93E-18 | 0        |
| 17Dec2011  | 4420  | 752.89  | 3.859901 | 2 R.LVVYGAN Splice@chr  | 2.02E-15 | 0        |
| 17Dec2011  | 4217  | 752.38  | -7.22956 | 2 R.LVVYGAN Splice@chr  | 3.84E-14 | 0        |
| 17Dec2011  | 6633  | 752.39  | 6.092325 | 2 R.LVVYGAN Splice@chr  | 4.86E-15 | 0        |
| 17Dec2011  | 3663  | 752.39  | 6.092325 | 2 R.LVVYGAN Splice@chr  | 8.46E-19 | 0        |
| 17Dec2011  | 3635  | 752.38  | -7.22956 | 2 R.LVVYGAN Splice@chr  | 1.49E-15 | 0        |
| 17Dec2011  | 4679  | 752.39  | 6.092325 | 2 R.LVVYGAN Splice@chr  | 4.19E-17 | 0        |
| 17Dec2011  | 4656  | 752.39  | 6.092325 | 2 R.LVVYGAN Splice@chr  | 1.24E-18 | 0        |
| 17Dec2011  | 6632  | 752.39  | 6.092325 | 2 R.LVVYGAN Splice@chr  | 1.31E-12 | 9.35E-04 |
| 17Dec2011  | 6020  | 752.39  | 6.092325 | 2 R.LVVYGAN Splice@chr  | 1.24E-12 | 0.001527 |
| 17Dec2011  | 4473  | 752.38  | -7.22956 | 2 R.LVVYGAN Splice@chr  | 5.93E-19 | 0        |
| 17Dec2011  | 4467  | 752.89  | 3.859901 | 2 R.LVVYGAN Splice@chr  | 6.66E-18 | 0        |

|            |       |         |          |                         |          |          |
|------------|-------|---------|----------|-------------------------|----------|----------|
| 17Dec2011  | 6736  | 752.38  | -7.22956 | 2 R.LVVYGAN Splice@chr  | 3.58E-19 | 0        |
| 17Dec2011  | 6764  | 752.39  | 6.092325 | 2 R.LVVYGAN Splice@chr  | 5.83E-17 | 0        |
| 17Dec2011  | 5248  | 752.39  | 6.092325 | 2 R.LVVYGAN Splice@chr  | 1.07E-18 | 0        |
| 16Mar2011  | 19020 | 863.95  | 12.51921 | 2 K.RCQIANR chrX@3321   | 3.52E-10 | 0.007928 |
| 16Mar2011  | 8348  | 472.91  | -6.46689 | 3 R.NLINHTE Splice@chr  | 2.52E-11 | 4.94E-04 |
| 16Mar2011  | 18317 | 1027.48 | -20.0555 | 1 _KLMNMM chr5@5468     | 5.23E-10 | 0.009277 |
| 19July2011 | 10637 | 971.52  | -16.5187 | 3 R.M+15.99 chr2@1468   | 3.27E-11 | 0.001287 |
| 16Mar2011  | 8288  | 512.78  | 4.061013 | 2 R.LRAERGA chr2@1134   | 1.08E-10 | 0.002173 |
| 19July2011 | 9386  | 915.18  | -20.2963 | 3 N.IHEKKK+ chr4@1409   | 3.17E-10 | 0.00945  |
| 16Mar2011  | 8563  | 695.42  | -0.61526 | 1 R.GAGIHIK chrX@7403   | 4.79E-10 | 0.009918 |
| 19July2011 | 5635  | 624.33  | 2.088945 | 3 R.HNPTFLIF chr5@2182  | 3.04E-10 | 0.005614 |
| 16Mar2011  | 14856 | 1183.61 | -22.7083 | 2 K.M+15.99 chrX@1535   | 6.74E-11 | 0.002219 |
| 19July2011 | 842   | 400.9   | -4.12263 | 3 K.KITGSLGI chr4@1870  | 2.09E-10 | 0.005026 |
| 19July2011 | 9019  | 776.43  | -12.9086 | 2 R.KIIFCNST chr2@1122  | 3.47E-10 | 0.008722 |
| 16Mar2011  | 19358 | 876.15  | 12.73991 | 3 _KEDLNEM chrX@5247    | 1.67E-10 | 0.004135 |
| 19July2011 | 10279 | 1015.51 | -28.4992 | 2 R.ANIKRSYI chr5@1965  | 2.42E-10 | 0.005042 |
| 19July2011 | 1441  | 528.27  | -9.95514 | 2 G.RHTFGYF Splice@chr  | 3.76E-10 | 0.009926 |
| 19July2011 | 10470 | 1162.12 | -20.0613 | 2 K.NVRILLTC Splice@chr | 1.10E-10 | 0.003035 |
| 16Mar2011  | 11537 | 885.99  | -8.13812 | 2 F.ENVVEVII Splice@chr | 1.45E-12 | 0        |
| 19July2011 | 8815  | 786.75  | 0.441276 | 3 K.RAK+14.C Splice@chr | 2.38E-10 | 0.006003 |
| 16Mar2011  | 8975  | 577.33  | 26.87278 | 2 _RHHLFW Splice@chr    | 3.34E-10 | 0.007634 |
| 16Mar2011  | 12416 | 790.93  | -27.5837 | 2 R.RDRQPIR chr2@1153   | 1.69E-10 | 0.003083 |
| 19July2011 | 4432  | 451.95  | 16.69348 | 3 _KVPKNGY chr1@3337    | 2.77E-10 | 0.008389 |
| 19July2011 | 5466  | 451.95  | 16.69348 | 3 _KVPKNGY chr1@3337    | 3.15E-10 | 0.006552 |
| 16Mar2011  | 12131 | 521.97  | 16.32435 | 3 _SKSVHEFI chr1@9758   | 3.75E-10 | 0.009821 |
| 17Dec2011  | 3392  | 544.35  | -10.2859 | 2 K.AVK+14.C chrX@1254  | 3.47E-11 | 0        |
| 17Dec2011  | 2625  | 544.35  | -10.2859 | 2 K.AVK+14.C chrX@1254  | 1.20E-10 | 0.006944 |
| 19July2011 | 6278  | 547.27  | -3.29716 | 2 _IDIFNDNI chr3@8987   | 1.60E-10 | 0.003035 |
| 19July2011 | 15697 | 874.43  | -21.0569 | 3 R.SYSDVSH chr4@1336   | 1.60E-10 | 0.005645 |
| 16Mar2011  | 20382 | 722.37  | -19.835  | 3 K.ERTDK+1 chrX@1631   | 9.82E-11 | 0.00236  |
| 19July2011 | 6865  | 513.54  | 28.22406 | 4 _FFEK+14. chr5@1422   | 3.80E-10 | 0.009049 |
| 19July2011 | 3017  | 603.31  | 15.87441 | 2 R.GANMMNI chr5@8859   | 8.69E-11 | 0.00252  |
| 16Mar2011  | 12862 | 661.34  | -19.3485 | 3 K.SMEHDQ chr3@8445    | 2.69E-10 | 0.008145 |
| 16Mar2011  | 4214  | 423.23  | 8.613989 | 2 K.IDPSGVEI chr1@5032  | 1.75E-11 | 4.63E-04 |
| 19July2011 | 14234 | 786.42  | 27.60082 | 3 _YHYFDKG Splice@chr   | 4.02E-11 | 0.001714 |
| 19July2011 | 15332 | 826.45  | -11.5349 | 2 K.NWHNFL chr3@1161    | 2.96E-10 | 0.008978 |
| 17Dec2011  | 5855  | 659.85  | 8.986163 | 2 K.RERM+15 chr4@1242   | 1.69E-11 | 0.003155 |
| 19July2011 | 11111 | 1130.58 | -9.79805 | 3 _VSCFK+14 chrX@1008   | 4.55E-11 | 0.001626 |
| 16Mar2011  | 9081  | 522.28  | -6.55693 | 3 R.YSPLPTAI chr5@1021  | 9.40E-11 | 0.002972 |
| 16Mar2011  | 9484  | 522.62  | 4.021396 | 3 R.YSPLPTAI chr5@1021  | 8.69E-11 | 0.002748 |
| 16Mar2011  | 18421 | 1162.63 | -1.44463 | 2 R.LK+14.01 chrX@1453  | 1.05E-10 | 0.003303 |
| 16Mar2011  | 5723  | 527.26  | -25.8244 | 3 K.NSLQEAC chr3@8555   | 1.53E-10 | 0.003621 |
| 19July2011 | 8951  | 467.74  | 5.819355 | 2 K.NQLETAN Splice@chr  | 1.74E-10 | 0.005098 |
| 19July2011 | 8578  | 467.74  | 5.819355 | 2 K.NQLETAN chr1@8413   | 1.80E-10 | 0.004153 |
| 16Mar2011  | 17988 | 1107.57 | 1.684038 | 2 K.SMPQINI chr1@1091   | 4.99E-11 | 0.001951 |
| 16Mar2011  | 1107  | 447.24  | -17.4733 | 3 _M+15.99 chr3@8415    | 1.92E-10 | 0.005064 |
| 16Mar2011  | 14455 | 639.36  | -16.9828 | 2 N.FSYLVKI chr3@2491   | 3.23E-11 | 0.001134 |

|            |       |         |          |                         |          |          |
|------------|-------|---------|----------|-------------------------|----------|----------|
| 16Mar2011  | 19425 | 1068.01 | -14.8498 | 2 R.M+15.99 Splice@chr  | 3.22E-10 | 0.008075 |
| 19July2011 | 14110 | 706.37  | -17.7384 | 4 K.K+14.016 chr5@1881  | 3.51E-10 | 0.00852  |
| 19July2011 | 6949  | 623.03  | -12.0744 | 3 P.RHIYDIGF chrX@5165  | 1.00E-10 | 0.002605 |
| 16Mar2011  | 4701  | 793.45  | 13.14203 | 2 K.CVEYILM Splice@chr  | 4.06E-10 | 0.008681 |
| 16Mar2011  | 21782 | 787.4   | -11.4539 | 2 _QK+14.01 chr4@1101   | 4.52E-10 | 0.009178 |
| 16Mar2011  | 5863  | 544.32  | 15.05366 | 2 K.RQLLKNC chr5@1684   | 3.34E-10 | 0.007569 |
| 16Mar2011  | 16774 | 672.01  | -24.7408 | 3 _LTASEQP chrX@4556    | 2.51E-10 | 0.007431 |
| 16Mar2011  | 16663 | 874.48  | 5.939536 | 2 K.NDLCVLS Splice@chr  | 2.13E-10 | 0.006153 |
| 16Mar2011  | 17420 | 874.48  | 5.939536 | 2 K.NDLCVLS Splice@chr  | 2.03E-10 | 0.005033 |
| 16Mar2011  | 15635 | 874.47  | -5.52027 | 2 K.NDLCVLS Splice@chr  | 2.49E-10 | 0.006239 |
| 16Mar2011  | 21226 | 731.63  | -21.204  | 4 K.FGHSLIVL chr1@1315  | 3.28E-10 | 0.00741  |
| 19July2011 | 6541  | 493.27  | 24.03092 | 3 R.M+15.99 Splice@chr  | 3.17E-10 | 0.007796 |
| 16Mar2011  | 11556 | 789.44  | 29.57276 | 2 K.SK+14.01 Splice@chr | 2.58E-10 | 0.00653  |
| 16Mar2011  | 14579 | 683.31  | -21.4381 | 2 L.REAM+15 Splice@chr  | 4.13E-10 | 0.009731 |
| 16Mar2011  | 14136 | 683.31  | -21.4381 | 2 L.REAM+15 Splice@chr  | 4.52E-10 | 0.009987 |
| 16Mar2011  | 1923  | 664.37  | -18.4598 | 2 K.QK+14.01 chr2@1088  | 2.16E-10 | 0.005822 |
| 16Mar2011  | 16847 | 1002.53 | 15.88477 | 2 _DPENKHF chr4@1215    | 2.43E-10 | 0.006131 |
| 19July2011 | 182   | 449.58  | -28.4565 | 3 R.KNQK+14 chr3@1268   | 2.68E-10 | 0.006257 |
| 16Mar2011  | 6147  | 424.75  | 0.720193 | 2 _LLMSSVA chrX@7406    | 3.96E-10 | 0.008026 |
| 16Mar2011  | 15116 | 814.48  | -1.6879  | 2 L.LNESRDG chr3@5385   | 5.54E-11 | 0.001659 |
| 19July2011 | 4546  | 469.59  | 7.902196 | 3 K.NPAFFVC chr4@2090   | 1.79E-10 | 0.004446 |
| 19July2011 | 5357  | 544.35  | 0.112333 | 2 K.ILLFFLPPI chr3@5438 | 3.33E-10 | 0.008561 |
| 19July2011 | 14499 | 467.63  | 17.9346  | 3 K.M+15.99 chr3@2162   | 2.17E-11 | 4.07E-04 |
| 16Mar2011  | 9412  | 618.3   | -12.3593 | 2 K.AFFTHDR Splice@chr  | 1.38E-10 | 0.003073 |
| 19July2011 | 3213  | 698.84  | 20.81685 | 2 G.FENIRDM Splice@chr  | 1.93E-10 | 0.005256 |
| 17Dec2011  | 575   | 516.29  | 21.4036  | 2 R.AQVMGC chr3@6355    | 1.47E-10 | 0.009132 |
| 16Mar2011  | 11962 | 573.36  | -0.58515 | 2 R.IWSTK+1 chrX@1757   | 2.33E-10 | 0.007788 |
| 19July2011 | 12972 | 714.03  | -0.99814 | 3 R.TESFNLM chr5@1946   | 3.60E-10 | 0.008904 |
| 19July2011 | 8199  | 661.36  | -14.7883 | 3 K.RIDAKNH chr5@1305   | 3.59E-10 | 0.009326 |
| 16Mar2011  | 20297 | 1023    | 3.762484 | 2 K.NCCNSEF chr2@1025   | 1.66E-10 | 0.004174 |
| 16Mar2011  | 16367 | 848.47  | 6.121831 | 2 R.KFERIDSS chr3@4796  | 1.54E-10 | 0.003494 |
| 16Mar2011  | 14991 | 886.46  | -20.1032 | 2 _GYWWEW Splice@chr    | 1.19E-10 | 0.004228 |
| 16Mar2011  | 21144 | 886.46  | -20.1032 | 2 _GYWWEW Splice@chr    | 2.13E-10 | 0.004311 |
| 16Mar2011  | 22180 | 1164.1  | -11.1249 | 2 K.K+14.016 chrX@6932  | 1.10E-10 | 0.003249 |
| 16Mar2011  | 21039 | 625.59  | -7.50223 | 4 R.LVQK+14 Splice@chr  | 7.32E-10 | 0.007786 |
| 16Mar2011  | 20011 | 1113.58 | 10.89887 | 3 K.FCMGEM Splice@chr   | 3.47E-10 | 0.007204 |
| 19July2011 | 4358  | 661.82  | 28.4259  | 2 K.EVENGPA chr4@2981   | 1.00E-11 | 5.09E-04 |
| 19July2011 | 9800  | 778.43  | 5.024644 | 2 K.IQSLNDQ Splice@chr  | 4.34E-15 | 0        |
| 19July2011 | 9749  | 778.44  | 17.9003  | 2 K.IQSLNDQ Splice@chr  | 8.57E-15 | 0        |
| 19July2011 | 5943  | 778.43  | 5.024644 | 2 K.IQSLNDQ Splice@chr  | 2.69E-15 | 0        |
| 19July2011 | 6001  | 778.43  | 5.024644 | 2 K.IQSLNDQ Splice@chr  | 4.49E-13 | 0        |
| 17Dec2011  | 6721  | 1049.56 | -22.3518 | 2 _KIYLIKLI chr3@5781   | 2.04E-11 | 0        |
| 19July2011 | 2104  | 535.8   | 5.8206   | 2 K.GRQVFNI chr3@1034   | 2.29E-10 | 0.004835 |
| 16Mar2011  | 7074  | 617.33  | 16.27136 | 1 R.NVGGGG Splice@chr   | 1.91E-10 | 0.003994 |
| 16Mar2011  | 7694  | 560.32  | 6.500752 | 2 R.KCRETIRF chr3@4400  | 4.67E-10 | 0.009886 |
| 16Mar2011  | 16059 | 885.99  | 22.34602 | 2 K.TKNSFLPI chr2@4888  | 2.85E-10 | 0.006937 |
| 16Mar2011  | 20469 | 1102.56 | 16.91829 | 3 K.IFSK+14.0 chr1@7525 | 3.58E-10 | 0.00806  |

|            |       |         |          |                         |          |          |
|------------|-------|---------|----------|-------------------------|----------|----------|
| 16Mar2011  | 16398 | 652.86  | -24.4377 | 2 R.VIVPISQC chr5@1614  | 2.16E-10 | 0.004926 |
| 16Mar2011  | 22062 | 709.9   | -6.02692 | 2 K.KINFDDL Splice@chr  | 5.07E-10 | 0.009748 |
| 16Mar2011  | 8886  | 566.31  | -4.75062 | 2 K.WFTHTKI chrX@4755   | 3.20E-10 | 0.006574 |
| 17Dec2011  | 694   | 458.29  | 16.77198 | 2 K.ATRVAQL chr1@9724   | 1.08E-10 | 0.00885  |
| 16Mar2011  | 3997  | 548.32  | 17.06254 | 2 R.HDATRR/ chr4@1067   | 5.16E-10 | 0.009277 |
| 16Mar2011  | 13460 | 562.97  | -9.70247 | 3 W.NEKVIGI chr3@8591   | 1.87E-11 | 1.27E-04 |
| 16Mar2011  | 13873 | 562.97  | -9.70247 | 3 W.NEKVIGI chr3@8591   | 3.02E-10 | 0.008737 |
| 16Mar2011  | 9264  | 432.91  | -16.545  | 3 _EAHLELS( chr4@6875   | 3.37E-10 | 0.007149 |
| 19July2011 | 4053  | 566.62  | -3.23729 | 3 _NPSDPLT Splice@chr   | 3.53E-10 | 0.009174 |
| 16Mar2011  | 3711  | 589.32  | -0.88077 | 2 K.KLENAET chr2@2478   | 4.17E-10 | 0.009837 |
| 16Mar2011  | 9702  | 1185.93 | -27.6085 | 3 _NNQMYMY chr5@1745    | 2.64E-11 | 9.36E-04 |
| 19July2011 | 2787  | 562.77  | -2.66237 | 2 R.AKTTCNS chr4@1035   | 2.49E-10 | 0.007743 |
| 19July2011 | 4875  | 652.36  | -27.0801 | 2 R.LESKISEK chr1@1251  | 2.19E-10 | 0.006454 |
| 19July2011 | 6190  | 626.68  | -21.2434 | 3 I.SRLEPPQK chr2@2836  | 2.20E-10 | 0.004955 |
| 16Mar2011  | 1243  | 457.27  | 2.345949 | 2 A.VATPGSR chr4@9178   | 2.95E-10 | 0.006771 |
| 16Mar2011  | 21064 | 1014.48 | -14.8148 | 1 K.FHWPYH Splice@chr   | 3.07E-11 | 0.001336 |
| 17Dec2011  | 2561  | 607.88  | 26.22348 | 2 R.SRIFGPP\ Splice@chr | 1.31E-10 | 0.006686 |
| 16Mar2011  | 503   | 425.22  | -10.657  | 2 K.HLNEHAk chr5@5137   | 2.86E-10 | 0.009274 |
| 16Mar2011  | 429   | 425.22  | -10.657  | 2 K.HLNEHAk chr5@5137   | 2.86E-10 | 0.006937 |
| 16Mar2011  | 142   | 425.22  | -10.657  | 2 K.HLNEHAk chr5@5137   | 3.63E-10 | 0.008785 |
| 19July2011 | 9616  | 588.82  | -27.2039 | 2 K.KIFFHRN( chr2@1326  | 3.03E-10 | 0.007916 |
| 17Dec2011  | 64    | 498.74  | 18.08774 | 2 R.MMMGC chr5@8609     | 9.93E-12 | 0.005714 |
| 17Dec2011  | 141   | 498.74  | 18.08774 | 2 R.MMMGC chr5@8609     | 1.02E-12 | 0.002004 |
| 16Mar2011  | 20717 | 1071.53 | -23.1473 | 2 R.NEIDYLK( chr5@1436  | 7.66E-11 | 0.002584 |
| 19July2011 | 8591  | 591.67  | -2.75555 | 3 K.THTVGK\ chrX@1485   | 2.28E-10 | 0.004651 |
| 16Mar2011  | 15791 | 742.35  | -8.7359  | 1 R.RTSASYG Splice@chr  | 2.27E-10 | 0.007799 |
| 19July2011 | 8992  | 738.9   | 6.451854 | 2 R.AK+14.01 Splice@chr | 6.47E-11 | 0.001969 |
| 19July2011 | 11427 | 668.86  | 11.60669 | 4 R.DSSSQDF Splice@chr  | 2.09E-10 | 0.005298 |
| 16Mar2011  | 19808 | 805.46  | 23.97603 | 2 K.KDQSIRM chr1@8385   | 2.26E-10 | 0.004381 |
| 16Mar2011  | 15701 | 685.68  | 0.744284 | 3 E.VFEVQSG chrX@3915   | 4.01E-12 | 1.32E-04 |
| 19July2011 | 2172  | 415.25  | -14.8916 | 3 K.LLLGMSIL chr2@7697  | 3.14E-10 | 0.008263 |
| 19July2011 | 6403  | 748.36  | -16.0068 | 2 K.M+15.99 chr2@8015   | 8.19E-11 | 0.00161  |
| 19July2011 | 3243  | 474.77  | 5.79742  | 2 R.ISSNFRPK chr2@1148  | 4.44E-10 | 0.009579 |
| 16Mar2011  | 11314 | 692.37  | 13.47459 | 2 R.SK+14.01 chr3@4897  | 2.55E-10 | 0.007196 |
| 16Mar2011  | 13372 | 892.92  | -18.7935 | 2 K.IM+15.95 chrX@3168  | 4.47E-11 | 0.001044 |
| 16Mar2011  | 15183 | 763.41  | -29.598  | 2 R.LDLSKYHI chr4@6145  | 2.78E-10 | 0.007789 |
| 16Mar2011  | 7964  | 439.24  | 15.50629 | 3 K.YFFKGEH chr5@6577   | 3.77E-10 | 0.008162 |
| 16Mar2011  | 10821 | 627.32  | -26.1617 | 3 K.TEFHMF( chr2@3716   | 1.66E-10 | 0.004685 |
| 19July2011 | 7536  | 708.91  | 3.064498 | 2 K.KVSMNIV chr2@3838   | 5.23E-11 | 0.003034 |
| 16Mar2011  | 3258  | 419.21  | -3.11352 | 3 R.NVHSTHI chr1@1465   | 2.46E-10 | 0.007849 |
| 16Mar2011  | 9390  | 649.64  | -27.9597 | 3 R.RATVSSA Splice@chr  | 1.37E-10 | 0.0041   |
| 17Dec2011  | 883   | 1068.53 | -6.17482 | 1 R.EFAIFNAt chr5@2145  | 3.96E-11 | 0.006944 |
| 19July2011 | 10771 | 578.63  | -8.87588 | 3 K.FDENCOQ( chr2@1386  | 2.14E-10 | 0.004955 |
| 16Mar2011  | 15623 | 1052.56 | -1.27694 | 2 H.ISNQGSV chr5@1300   | 3.74E-10 | 0.008398 |
| 16Mar2011  | 4639  | 661.36  | 7.817807 | 2 K.QKFEICE( chr1@3005  | 2.03E-10 | 0.005671 |
| 16Mar2011  | 18685 | 1170.54 | -29.3142 | 2 K.ISSISKYE( chr3@4524 | 1.26E-10 | 0.002885 |
| 16Mar2011  | 16094 | 588.34  | -20.898  | 3 R.LLAQIFR( chr5@4922  | 2.40E-10 | 0.006009 |

|            |       |         |          |                        |          |          |
|------------|-------|---------|----------|------------------------|----------|----------|
| 19July2011 | 10713 | 744.46  | -17.7326 | 2 K.KKSSEKLk chr1@4885 | 3.19E-10 | 0.006597 |
| 16Mar2011  | 22687 | 1040.9  | 3.834672 | 3 E.LFQIIVM+ chr2@1065 | 1.30E-10 | 0.004236 |
| 16Mar2011  | 20732 | 1040.89 | -5.8694  | 3 E.LFQIIVM+ chr2@1065 | 6.03E-11 | 0.001546 |
| 16Mar2011  | 20509 | 1040.89 | -5.8694  | 3 E.LFQIIVM+ chr2@1065 | 4.20E-11 | 0.001044 |
| 16Mar2011  | 20184 | 1040.89 | -5.8694  | 3 E.LFQIIVM+ chr2@1065 | 3.71E-10 | 0.009147 |
| 16Mar2011  | 22837 | 1040.89 | -5.8694  | 3 E.LFQIIVM+ chr2@1065 | 6.18E-11 | 0.002043 |
| 16Mar2011  | 22249 | 1040.89 | -5.8694  | 3 E.LFQIIVM+ chr2@1065 | 2.34E-10 | 0.006112 |
| 16Mar2011  | 22209 | 1040.89 | -5.8694  | 3 E.LFQIIVM+ chr2@1065 | 2.09E-11 | 4.94E-04 |
| 19July2011 | 10820 | 724.41  | 14.68101 | 1 K.ASGKYAK chr3@1182  | 2.22E-10 | 0.005021 |
| 16Mar2011  | 19258 | 623.99  | 29.52327 | 3 K.FGRSLNS chrX@4098  | 3.86E-10 | 0.009038 |
| 17Dec2011  | 1576  | 808.4   | 26.94884 | 1 R.AQGDNF chrX@1480   | 1.88E-10 | 0.004992 |
| 16Mar2011  | 18113 | 830.52  | 24.46427 | 3 _RVLREKYI Splice@chr | 2.44E-10 | 0.006263 |
| 16Mar2011  | 1839  | 805.37  | -23.0172 | 1 R.QEGAGSt chr4@8844  | 3.50E-11 | 8.87E-04 |
| 16Mar2011  | 17136 | 826.45  | 4.477555 | 2 _K+14.016 Splice@chr | 2.58E-10 | 0.005401 |
| 16Mar2011  | 16901 | 826.45  | 4.477555 | 2 _K+14.016 Splice@chr | 1.64E-11 | 0        |
| 19July2011 | 12857 | 813.4   | -15.0258 | 3 R.LESRKQA chr4@1042  | 2.83E-10 | 0.006237 |
| 16Mar2011  | 17290 | 1148.1  | 3.434403 | 2 L.K+14.016 chr5@1174 | 2.11E-10 | 0.005821 |
| 19July2011 | 12495 | 989.51  | -9.0147  | 2 N.NKFM+1 chr3@3045   | 2.05E-10 | 0.00538  |
| 16Mar2011  | 13419 | 668.41  | 26.29011 | 1 R.GGGHIVk chr4@4025  | 3.58E-10 | 0.00806  |
| 17Dec2011  | 2765  | 636.39  | 12.68015 | 2 R.SRRHVKP chr2@2562  | 8.50E-11 | 0.001361 |
| 16Mar2011  | 7453  | 870.5   | -7.30633 | 1 K.IQKMPPF chrX@1225  | 4.72E-10 | 0.00974  |
| 17Dec2011  | 575   | 959.44  | -12.0462 | 1 R.EAEGEGC chr2@7335  | 1.45E-11 | 0        |
| 17Dec2011  | 1384  | 958.44  | -8.54227 | 1 R.EAEGEGC chr2@7335  | 5.77E-11 | 0.008451 |
| 17Dec2011  | 1375  | 959.44  | -12.0462 | 1 R.EAEGEGC chr2@7335  | 3.12E-11 | 0        |
| 17Dec2011  | 1371  | 958.44  | -8.54227 | 1 R.EAEGEGC chr2@7335  | 7.19E-12 | 0        |
| 17Dec2011  | 921   | 958.44  | -8.54227 | 1 R.EAEGEGC chr2@7335  | 2.67E-11 | 0.003155 |
| 17Dec2011  | 1006  | 959.44  | -12.0462 | 1 R.EAEGEGC chr2@7335  | 5.78E-11 | 0.00545  |
| 19July2011 | 10309 | 1198.09 | -25.885  | 2 K.NLTQRKI! chr5@1301 | 5.20E-11 | 0.002232 |
| 19July2011 | 11688 | 1198.09 | -25.885  | 2 K.NLTQRKI! chr5@1301 | 5.91E-11 | 0.001815 |
| 19July2011 | 8724  | 630.57  | 0.193897 | 4 _EWSMLT! Splice@chr  | 1.48E-10 | 0.003447 |
| 19July2011 | 12899 | 764.84  | -20.8552 | 2 K.CRISYWN Splice@chr | 2.33E-10 | 0.005116 |
| 16Mar2011  | 17779 | 676.36  | 13.07447 | 3 K.SLSGSK- chr4@4715  | 1.81E-10 | 0.005033 |
| 16Mar2011  | 18632 | 985.55  | 25.29396 | 2 R.FADLSEIS chr1@1496 | 3.66E-10 | 0.008739 |
| 19July2011 | 6256  | 500.27  | -0.652   | 3 K.KNNLK+1 chr3@1188  | 3.89E-10 | 0.009277 |
| 19July2011 | 5521  | 652.66  | -9.49101 | 3 _EDKNDNI chr4@1616   | 3.92E-10 | 0.007546 |
| 16Mar2011  | 12107 | 990.5   | -28.8497 | 2 G.SQSRM+ chr5@9584   | 2.64E-10 | 0.009021 |
| 16Mar2011  | 8005  | 566.36  | -25.2284 | 2 K.KQKTKNk chr5@1737  | 1.15E-10 | 0.003797 |
| 19July2011 | 7535  | 792.43  | -13.8044 | 2 K.IRWIWC chrX@1130   | 1.28E-10 | 0.00358  |
| 16Mar2011  | 11835 | 981.53  | -22.4709 | 1 K.EPWLAIR chr1@1285  | 3.36E-10 | 0.007909 |
| 19July2011 | 4166  | 516.62  | -7.69787 | 3 K.VQK+14.1 chr3@1927 | 2.91E-10 | 0.005804 |
| 19July2011 | 2240  | 531.79  | -19.0466 | 2 R.KNGVTVC chrX@1690  | 3.65E-10 | 0.009589 |
| 19July2011 | 776   | 431.75  | 11.06792 | 2 _SSGGATL chr5@6795   | 3.51E-10 | 0.009142 |
| 16Mar2011  | 20185 | 956.52  | 2.815794 | 1 K.ISLVFDVY chrX@7831 | 1.03E-09 | 0.009665 |
| 16Mar2011  | 17597 | 955.53  | 16.81733 | 1 K.ISLVFDVY chrX@7831 | 3.01E-10 | 0.00889  |
| 16Mar2011  | 2233  | 473.26  | 11.5124  | 3 R.K+14.016 chr1@9085 | 2.63E-11 | 9.89E-04 |
| 19July2011 | 1641  | 423.74  | 17.61498 | 2 R.SPTESVVI chrX@1494 | 3.29E-10 | 0.007796 |
| 19July2011 | 6606  | 665.01  | -19.0969 | 3 R.CLRTFEA` chr3@1896 | 4.54E-10 | 0.009715 |

|            |       |         |          |                         |          |          |
|------------|-------|---------|----------|-------------------------|----------|----------|
| 16Mar2011  | 16155 | 940.51  | -19.076  | 2 _..LIVYFM+ Splice@chr | 2.57E-10 | 0.005792 |
| 16Mar2011  | 16696 | 1035.51 | -17.1096 | 2 K.IEQILKAK chr5@1675  | 3.31E-10 | 0.00676  |
| 16Mar2011  | 14328 | 678.92  | 15.21598 | 2 K.TRKYIRK+ chrX@1065  | 3.78E-10 | 0.008398 |
| 16Mar2011  | 19478 | 1147.62 | -17.3175 | 3 K.STVISYSK chr3@6927  | 3.92E-10 | 0.009438 |
| 19July2011 | 2776  | 636.33  | -9.41473 | 2 K.NPCIDVN Splice@chr  | 1.04E-10 | 0.003638 |
| 19July2011 | 7717  | 791.41  | 3.474929 | 2 R.CKTSTRN Splice@chr  | 5.92E-11 | 0.003285 |
| 16Mar2011  | 10920 | 546.81  | -13.8663 | 2 K.ITILKMM Splice@chr  | 3.22E-10 | 0.007381 |
| 19July2011 | 7367  | 702.4   | 26.14918 | 3 K.ESNSVWI Splice@chr  | 2.10E-10 | 0.00574  |
| 16Mar2011  | 1320  | 533.77  | -24.8597 | 2 K.HANFKFF Splice@chr  | 3.92E-11 | 0.00144  |
| 16Mar2011  | 10804 | 703.39  | -4.52205 | 1 K.GGGDRLI chr2@5987   | 2.42E-10 | 0.005712 |
| 16Mar2011  | 20935 | 983.54  | -14.6478 | 4 R.CRNIHRN chr1@4784   | 3.91E-10 | 0.008463 |
| 17Dec2011  | 5067  | 816.43  | -3.44313 | 1 K.SRGTNIG chr5@1406   | 8.17E-11 | 0.009202 |
| 19July2011 | 11976 | 803.46  | -2.43394 | 3 K.KDFIDVS+ chr2@1332  | 7.13E-11 | 0.002369 |
| 16Mar2011  | 18022 | 737.07  | -22.2039 | 3 K.RSLFLCISI chr3@1177 | 1.31E-10 | 0.003751 |
| 19July2011 | 9132  | 909.47  | 19.55925 | 3 _..KGSCCK+1 chrX@5875 | 8.11E-11 | 0.003011 |
| 19July2011 | 8753  | 718.86  | -1.44542 | 4 K.RGVGMN chr3@8437    | 6.23E-11 | 7.76E-04 |
| 19July2011 | 10423 | 508.27  | -1.16247 | 3 R.FVIFVLF chr5@1368   | 3.11E-10 | 0.00945  |
| 17Dec2011  | 1288  | 455.29  | 8.677928 | 2 K.VFVAFVV chr3@1347   | 1.19E-10 | 0.001361 |
| 19July2011 | 148   | 617.33  | -29.3841 | 2 R.KKTIKDEI Splice@chr | 2.68E-10 | 0.006139 |
| 16Mar2011  | 1011  | 468.24  | -3.22223 | 3 R.AVCRIPPI chr5@1957  | 1.82E-10 | 0.006738 |
| 16Mar2011  | 15406 | 623.83  | -16.5613 | 2 _..RSDKESG chr4@9007  | 2.51E-10 | 0.006356 |
| 16Mar2011  | 11069 | 516.79  | 8.708259 | 2 R.NGSTAAL Splice@chr  | 3.64E-10 | 0.008785 |
| 19July2011 | 2897  | 750.35  | -9.73847 | 2 K.WLDSNSI chr1@1318   | 1.03E-10 | 0.001924 |
| 16Mar2011  | 14971 | 746.91  | -5.07327 | 2 R.M+15.99 chr4@1747   | 3.51E-10 | 0.009029 |
| 17Dec2011  | 1441  | 545.8   | -19.2292 | 2 K.FPVAAK+ chr3@1034   | 1.11E-10 | 0.00656  |
| 19July2011 | 1802  | 620.82  | -21.6637 | 2 K.ARFDYVV chr5@1085   | 1.07E-10 | 0.003035 |
| 19July2011 | 8053  | 836.19  | 5.647804 | 4 _..LLK+14.0 chr2@1770 | 1.63E-10 | 0.004955 |
| 16Mar2011  | 7014  | 771.89  | -17.8142 | 2 _..LFSYSSLF chr2@5428 | 3.22E-10 | 0.009888 |
| 16Mar2011  | 11454 | 566.33  | 18.89428 | 2 K.KTILGNA+ Splice@chr | 9.18E-11 | 0.00354  |
| 16Mar2011  | 12040 | 520.77  | -9.15938 | 2 _..KFEVNFE chrX@6145  | 7.96E-11 | 0.001761 |
| 16Mar2011  | 12392 | 520.77  | -9.15938 | 2 _..KFEVNFE chrX@6145  | 4.38E-10 | 0.00566  |
| 19July2011 | 3624  | 449.21  | -14.5708 | 2 K.MYGLGN chr5@9256    | 1.17E-10 | 0.004093 |
| 19July2011 | 9948  | 753.39  | -10.252  | 3 R.RTDFPSFI Splice@chr | 2.33E-10 | 0.005929 |
| 16Mar2011  | 22092 | 980.17  | -14.7773 | 3 K.RK+14.01 chrX@8883  | 3.13E-10 | 0.007863 |
| 16Mar2011  | 9162  | 950.96  | -29.0405 | 2 K.KYFEK+1+ chr3@1318  | 2.37E-10 | 0.005002 |
| 19July2011 | 11298 | 800.41  | -8.93299 | 4 K.GYAAPVC chr1@1258   | 3.58E-10 | 0.009326 |
| 16Mar2011  | 9812  | 984.51  | -1.05463 | 3 R.RNDAK+1 Splice@chr  | 3.07E-10 | 0.006495 |
| 16Mar2011  | 20637 | 790.4   | 26.05724 | 2 K.KRERSSCI Splice@chr | 5.90E-11 | 0.001132 |
| 19July2011 | 3401  | 598.35  | -5.82411 | 2 K.KRYFPIFP chr2@4347  | 2.78E-10 | 0.005635 |
| 16Mar2011  | 4489  | 747.37  | -2.37184 | 1 R.EEGNGLK chr2@1218   | 2.82E-10 | 0.007018 |
| 16Mar2011  | 14814 | 863.45  | -10.9693 | 2 S.FHQSLN Splice@chr   | 2.33E-10 | 0.005423 |
| 19July2011 | 1726  | 548.31  | 8.206271 | 2 K.WSIGYTL Splice@chr  | 1.60E-10 | 0.003906 |
| 16Mar2011  | 8124  | 521.52  | -12.7812 | 4 K.QCTWAL+ chr3@1307   | 3.45E-11 | 5.07E-04 |
| 16Mar2011  | 22648 | 1063.25 | 22.70456 | 3 K.KSNFWKI Splice@chr  | 2.79E-10 | 0.008652 |
| 16Mar2011  | 15535 | 1020.62 | -0.47889 | 1 R.VAGRYSII Splice@chr | 4.57E-12 | 0        |
| 16Mar2011  | 22656 | 760.41  | 13.10091 | 2 R.PSWKSRF chr2@1135   | 8.53E-11 | 0.001735 |
| 16Mar2011  | 1435  | 446.27  | -10.5548 | 2 R.HLALPNV chr5@8698   | 4.41E-10 | 0.009096 |

|            |       |         |          |                         |          |          |
|------------|-------|---------|----------|-------------------------|----------|----------|
| 19July2011 | 5710  | 679.35  | -27.8921 | 2 K.SRSNDAL chr2@1111   | 2.33E-10 | 0.005817 |
| 16Mar2011  | 17070 | 1028.06 | 7.403441 | 2 K.FLKLCEYF chr5@1492  | 2.88E-10 | 0.007761 |
| 16Mar2011  | 8988  | 688.36  | 29.1937  | 2 R.ITNCAASI chr5@2019  | 4.95E-11 | 0.001366 |
| 16Mar2011  | 4601  | 524.79  | 0.17701  | 2 R.NSSLGVII Splice@chr | 4.17E-10 | 0.008818 |
| 19July2011 | 2875  | 524.79  | 0.17701  | 2 R.NSSLGVII Splice@chr | 4.14E-10 | 0.009537 |
| 19July2011 | 1172  | 524.79  | 0.17701  | 2 R.NSSLGVII Splice@chr | 3.86E-10 | 0.008296 |
| 16Mar2011  | 3470  | 657.38  | -7.16007 | 2 R.QLQMSP chr5@7160    | 2.14E-10 | 0.005181 |
| 19July2011 | 418   | 530.77  | -6.10622 | 2 P.KSSNPDE Splice@chr  | 3.40E-10 | 0.008221 |
| 16Mar2011  | 11375 | 983.51  | 11.37308 | 3 R.LSYHQKN chrX@4370   | 2.82E-10 | 0.006817 |
| 16Mar2011  | 7148  | 563.33  | 18.99508 | 2 K.IEFFKNVS chr5@3314  | 1.65E-10 | 0.004958 |
| 19July2011 | 8402  | 708.06  | 14.73275 | 3 W.TCK+14. chrX@6579   | 1.48E-10 | 0.005008 |
| 19July2011 | 8480  | 754.39  | 4.176488 | 2 _QFGEILEI chr1@4370   | 2.72E-10 | 0.007935 |
| 16Mar2011  | 18989 | 638.98  | -20.1955 | 3 K.LTK+14.0 Splice@chr | 1.45E-10 | 0.004432 |
| 16Mar2011  | 12652 | 977.61  | -1.31244 | 2 K.VSK+14.0 chrX@8018  | 3.46E-10 | 0.007846 |
| 16Mar2011  | 16353 | 1167.55 | -25.3067 | 2 L.K+14.016 Splice@chr | 8.42E-13 | 0        |
| 16Mar2011  | 16444 | 1167.55 | -25.3067 | 2 L.K+14.016 Splice@chr | 7.54E-14 | 0        |
| 16Mar2011  | 15976 | 1167.55 | -25.3067 | 2 L.K+14.016 Splice@chr | 3.53E-12 | 3.13E-04 |
| 16Mar2011  | 17541 | 1167.55 | -25.3067 | 2 L.K+14.016 Splice@chr | 8.85E-13 | 0        |
| 16Mar2011  | 17272 | 1167.55 | -25.3067 | 2 L.K+14.016 Splice@chr | 3.38E-13 | 0        |
| 16Mar2011  | 9426  | 862.42  | -21.3268 | 4 R.K+14.016 chr5@8128  | 1.32E-10 | 0.002178 |
| 17Dec2011  | 2190  | 551.28  | -28.0615 | 2 K.LVSYSYLE chr4@6709  | 4.44E-11 | 0.006944 |
| 19July2011 | 4186  | 626.65  | -27.9653 | 3 K.PMQIIKIT chr1@9779  | 2.62E-10 | 0.006596 |
| 19July2011 | 14770 | 785.73  | -27.7924 | 3 R.FNIELADI Splice@chr | 3.57E-10 | 0.00852  |
| 19July2011 | 8930  | 669.41  | -8.67485 | 2 K.FPVVFPP chr2@1429   | 8.45E-12 | 2.82E-04 |
| 19July2011 | 1744  | 588.34  | -5.61161 | 2 K.NQKLSYA chr4@1190   | 5.24E-11 | 0.001422 |
| 16Mar2011  | 14197 | 800.92  | 19.38117 | 2 S.QEVLENF chr5@1824   | 3.30E-10 | 0.006865 |
| 16Mar2011  | 22107 | 988.52  | 29.40612 | 2 R.RDEVDMI chr5@1539   | 1.44E-10 | 0.003623 |
| 16Mar2011  | 15597 | 965.47  | 8.227005 | 2 R.ISYKSNEI Splice@chr | 4.77E-10 | 0.009979 |
| 16Mar2011  | 18160 | 738.09  | -17.8654 | 3 K.LKFSIFGI chr1@1397  | 8.66E-11 | 0.002194 |
| 16Mar2011  | 21341 | 959.54  | 18.06294 | 2 Y.NNCKLNS chrX@1250   | 8.78E-11 | 0.002604 |
| 16Mar2011  | 14778 | 959.54  | 18.06294 | 2 Y.NNCKLNS chrX@1250   | 1.62E-10 | 0.005818 |
| 19July2011 | 5644  | 659.88  | 18.77503 | 2 K.FPM+15.1 chrX@1619  | 5.24E-10 | 0.009939 |
| 16Mar2011  | 7884  | 561.32  | -9.97407 | 2 K.IKASGKKI chrX@2691  | 1.26E-10 | 0.004501 |
| 16Mar2011  | 6952  | 640.81  | -21.5267 | 2 K.FETFFVSF chr1@6740  | 2.91E-10 | 0.008245 |
| 16Mar2011  | 6984  | 640.81  | -21.5267 | 2 K.FETFFVSF chr1@6740  | 3.31E-10 | 0.008646 |
| 16Mar2011  | 7435  | 640.81  | -21.5267 | 2 K.FETFFVSF chr1@6740  | 8.20E-11 | 0.002525 |
| 16Mar2011  | 7479  | 640.81  | -21.5267 | 2 K.FETFFVSF chr1@6740  | 3.08E-10 | 0.008835 |
| 19July2011 | 398   | 633.33  | -5.98454 | 2 K.KMDQIM Splice@chr   | 3.64E-11 | 0.002558 |
| 16Mar2011  | 16352 | 962.94  | -20.5354 | 2 K.K+14.016 chr1@4936  | 2.85E-10 | 0.005993 |
| 16Mar2011  | 6481  | 711.88  | -29.4253 | 2 K.TIGFGGQ Splice@chr  | 3.55E-11 | 0.001153 |
| 19July2011 | 4719  | 587.35  | 5.517054 | 2 R.K+14.016 chr1@8759  | 4.56E-10 | 0.00922  |
| 19July2011 | 9299  | 805.93  | 11.26885 | 2 R.FLRTRMI Splice@chr  | 3.84E-10 | 0.009246 |
| 16Mar2011  | 17898 | 1004.03 | 2.953841 | 2 R.SRVLNGF chr5@3539   | 2.36E-10 | 0.006239 |
| 19July2011 | 913   | 483.26  | 6.897717 | 2 R.QVSIYEAI chr5@1409  | 8.41E-11 | 0.003016 |
| 17Dec2011  | 2171  | 551.28  | -15.5283 | 2 K.PDLHSKN chr5@6698   | 3.76E-11 | 0.00625  |
| 19July2011 | 12454 | 712.72  | -6.06021 | 3 K.VYM+15. chrX@1612   | 2.76E-10 | 0.006639 |
| 19July2011 | 11013 | 991.85  | -18.3823 | 3 K.YEK+14.0 chr4@1650  | 1.37E-10 | 0.003765 |

|            |       |         |          |                          |          |          |
|------------|-------|---------|----------|--------------------------|----------|----------|
| 19July2011 | 12231 | 647.33  | -9.66761 | 3 _..LTK+14.0 Splice@chr | 2.90E-10 | 0.005865 |
| 19July2011 | 10689 | 912.9   | 9.7453   | 2 R.MMSRQI Splice@chr    | 2.51E-10 | 0.007208 |
| 17Dec2011  | 4331  | 671.42  | 9.741508 | 2 _..SRRLDQK chr1@1105   | 1.40E-10 | 0.003416 |
| 16Mar2011  | 16688 | 1187.57 | 1.92038  | 3 R.NGAPPSC Splice@chr   | 7.43E-11 | 0.002209 |
| 16Mar2011  | 2794  | 1198.14 | -2.21785 | 2 _..KIIEFYSKI chr5@1786 | 8.66E-12 | 3.21E-04 |
| 16Mar2011  | 2840  | 1198.14 | -2.21785 | 2 _..KIIEFYSKI chr5@1786 | 1.46E-10 | 0.004835 |
| 16Mar2011  | 2742  | 1198.14 | -2.21785 | 2 _..KIIEFYSKI chr5@1786 | 1.64E-11 | 4.63E-04 |
| 19July2011 | 7749  | 677     | -24.0574 | 3 R.ECSK+14. chr5@3674   | 2.24E-10 | 0.005419 |
| 17Dec2011  | 8399  | 1313.72 | 11.588   | 1 R.SFTDSVH chr5@9098    | 9.95E-11 | 0.005948 |
| 16Mar2011  | 1887  | 530.29  | 20.06554 | 2 R.SCVVIEQI chr2@1224   | 5.14E-10 | 0.009902 |
| 19July2011 | 9497  | 835.45  | 24.53043 | 4 R.WSRM+1 chrX@9735     | 3.36E-10 | 0.007953 |
| 19July2011 | 605   | 560.82  | 11.18743 | 2 _..QNLSKAS chr5@1074   | 3.12E-10 | 0.007796 |
| 16Mar2011  | 3681  | 588.37  | 24.00471 | 2 K.EAAAAILI Splice@chr  | 3.29E-10 | 0.007569 |
| 16Mar2011  | 3529  | 588.37  | 24.00471 | 2 K.EAAAAILI Splice@chr  | 2.79E-12 | 3.66E-04 |
| 16Mar2011  | 3884  | 588.37  | 24.00471 | 2 K.EAAAAILI Splice@chr  | 1.96E-10 | 0.007245 |
| 16Mar2011  | 6070  | 417.25  | -7.22473 | 4 R.TLNLTFL chr4@5624    | 3.91E-12 | 0        |
| 16Mar2011  | 9456  | 417.25  | -7.22473 | 4 R.TLNLTFL chr4@5624    | 2.51E-10 | 0.007849 |
| 19July2011 | 7954  | 657.04  | -7.75301 | 3 _..ADK+14.( Splice@chr | 4.86E-11 | 0.00222  |
| 16Mar2011  | 16388 | 1076.58 | -8.14589 | 2 R.EKHFWRI chr1@6851    | 1.06E-10 | 0.004666 |
| 16Mar2011  | 15243 | 594.34  | 27.22659 | 3 K.K+14.016 chr4@8171   | 3.05E-10 | 0.007243 |
| 16Mar2011  | 4974  | 484.73  | -5.6149  | 2 K.FSEKLESE Splice@chr  | 1.86E-10 | 0.004322 |
| 16Mar2011  | 22268 | 883.8   | -20.5408 | 3 R.NFFPEIHI chr2@1118   | 1.36E-10 | 0.003296 |
| 19July2011 | 8216  | 586.33  | -21.0633 | 3 R.WPIYGIL chrX@2235    | 3.28E-10 | 0.008985 |
| 16Mar2011  | 14469 | 943.45  | -3.17337 | 2 K.NCYFK+1 chrX@1308    | 2.58E-10 | 0.008051 |
| 19July2011 | 12074 | 958.52  | 17.27478 | 2 R.SHTYDAC chr5@7125    | 8.60E-11 | 0.004467 |
| 16Mar2011  | 293   | 471.76  | 18.99475 | 2 K.RSPACVP Splice@chr   | 2.00E-11 | 5.79E-04 |
| 16Mar2011  | 303   | 471.76  | 18.99475 | 2 K.RSPACVP Splice@chr   | 2.00E-10 | 0.004179 |
| 16Mar2011  | 286   | 471.76  | 18.99475 | 2 K.RSPACVP Splice@chr   | 1.39E-11 | 1.81E-04 |
| 16Mar2011  | 826   | 548.28  | -18.0669 | 2 P.M+15.99 Splice@chr   | 4.12E-10 | 0.009022 |
| 16Mar2011  | 856   | 548.28  | -18.0669 | 2 P.M+15.99 Splice@chr   | 5.91E-10 | 0.006822 |
| 16Mar2011  | 13009 | 902.01  | 17.27436 | 2 K.QMKTDS chr3@1888     | 3.26E-10 | 0.007936 |
| 19July2011 | 9619  | 983.96  | -9.62443 | 2 K.DHK+14.( chr1@7541   | 3.89E-11 | 0.002613 |
| 19July2011 | 8221  | 631.36  | -18.244  | 3 K.LLMSWIL Splice@chr   | 6.21E-11 | 0.00222  |
| 19July2011 | 6314  | 631.36  | -18.244  | 3 K.LLMSWIL Splice@chr   | 1.66E-10 | 0.005098 |
| 19July2011 | 5343  | 631.36  | -18.244  | 3 K.LLMSWIL Splice@chr   | 3.14E-10 | 0.008047 |
| 16Mar2011  | 19979 | 944.5   | -19.3837 | 2 K.QRWWFI Splice@chr    | 2.76E-10 | 0.006552 |
| 19July2011 | 10537 | 907.04  | -27.2822 | 2 R.K+14.016 chr3@9047   | 2.82E-10 | 0.006873 |
| 19July2011 | 11497 | 907.04  | -27.2822 | 2 R.K+14.016 chr3@9047   | 3.06E-10 | 0.008277 |
| 16Mar2011  | 21287 | 722.37  | -19.7221 | 3 K.ERTDK+1 chrX@1631    | 1.11E-10 | 0.003494 |
| 16Mar2011  | 19343 | 722.37  | -19.7221 | 3 K.ERTDK+1 chrX@1631    | 2.20E-10 | 0.00392  |
| 16Mar2011  | 19225 | 722.37  | -19.7221 | 3 K.ERTDK+1 chrX@1631    | 1.67E-10 | 0.004958 |
| 19July2011 | 9212  | 947.49  | 14.74429 | 2 M.SSMHFN Splice@chr    | 6.16E-11 | 0.001815 |
| 19July2011 | 2442  | 423.56  | 14.44462 | 3 K.TAHGLSE Splice@chr   | 2.17E-10 | 0.007591 |
| 16Mar2011  | 4912  | 439.91  | -18.8195 | 3 R.NSYNGLF chr4@9687    | 1.75E-10 | 0.00442  |
| 17Dec2011  | 7044  | 639.83  | 15.00052 | 2 R.NPAQITE chr4@5738    | 3.05E-11 | 0.003623 |
| 17Dec2011  | 7073  | 639.83  | 15.00052 | 2 R.NPAQITE chr4@5738    | 4.22E-12 | 0.001894 |
| 16Mar2011  | 10165 | 1010.14 | -9.65949 | 3 K.AVM+15. Splice@chr   | 6.50E-17 | 0        |

|            |       |         |          |                         |          |          |
|------------|-------|---------|----------|-------------------------|----------|----------|
| 19July2011 | 5056  | 539.28  | -28.3469 | 3 R.SDRKALN chrX@1311   | 6.77E-11 | 0.002572 |
| 19July2011 | 3392  | 486.95  | 6.196388 | 3 K.LGKLLDM Splice@chr  | 4.85E-10 | 0.009954 |
| 16Mar2011  | 13564 | 1138.56 | -24.7711 | 2 K.WPLLKM Splice@chr   | 1.39E-10 | 0.003073 |
| 16Mar2011  | 17821 | 752.96  | 26.2778  | 2 K.LKM+15.! chr3@3266  | 3.28E-11 | 8.60E-04 |
| 16Mar2011  | 1669  | 475.24  | -2.89581 | 2 _RSGASCR chr4@3854    | 1.63E-10 | 0.003925 |
| 19July2011 | 8916  | 715.91  | -19.8067 | 2 R.M+15.99 chr5@1593   | 2.32E-10 | 0.007554 |
| 16Mar2011  | 15780 | 634.33  | -21.8762 | 2 K.EWK+14. chr2@4598   | 1.20E-10 | 0.003113 |
| 16Mar2011  | 5195  | 407.27  | 15.32429 | 2 K.LISGKPAK chr1@3273  | 5.07E-10 | 0.009902 |
| 17Dec2011  | 5922  | 686.92  | 21.95264 | 2 R.SRLRRWF chr5@4858   | 4.91E-12 | 0        |
| 16Mar2011  | 4904  | 680.37  | -18.2376 | 2 K.RRRDKD1 chr4@3636   | 2.39E-10 | 0.006403 |
| 19July2011 | 1934  | 476.25  | 27.13027 | 2 K.RGCFGTP chr2@4351   | 7.01E-11 | 0.003297 |
| 19July2011 | 2281  | 476.25  | 27.13027 | 2 K.RGCFGTP chr2@4351   | 1.13E-11 | 8.70E-04 |
| 16Mar2011  | 5139  | 461.26  | 12.66465 | 2 R.LKSSGSS( chr2@4741  | 2.76E-10 | 0.00749  |
| 16Mar2011  | 5234  | 461.26  | 12.66465 | 2 R.LKSSGSS( Splice@chr | 2.45E-10 | 0.007986 |
| 19July2011 | 4889  | 460.92  | -6.54701 | 3 K.MSKNVFI chr2@1176   | 1.18E-10 | 0.002794 |
| 16Mar2011  | 15344 | 1090.06 | -10.0635 | 2 N.SK+14.01 chr3@2095  | 1.65E-10 | 0.003589 |
| 19July2011 | 10913 | 651.69  | -25.2008 | 3 K.INLANQG chrX@1001   | 1.98E-10 | 0.00523  |
| 16Mar2011  | 2779  | 830.44  | -19.1322 | 1 K.EMKPIGR Splice@chr  | 4.17E-10 | 0.008256 |
| 16Mar2011  | 4980  | 830.44  | -19.1322 | 1 K.EMKPIGR Splice@chr  | 3.27E-10 | 0.009018 |
| 16Mar2011  | 4345  | 830.44  | -19.1322 | 1 K.EMKPIGR Splice@chr  | 3.27E-10 | 0.00922  |
| 16Mar2011  | 17507 | 769.4   | 9.108319 | 3 H.SSENK+1 chr5@1384   | 2.64E-10 | 0.006211 |
| 16Mar2011  | 19236 | 887.42  | -14.0465 | 2 S.FCLLYKGF Splice@chr | 2.46E-10 | 0.005559 |
| 16Mar2011  | 18165 | 887.42  | -14.0465 | 2 S.FCLLYKGF Splice@chr | 3.41E-10 | 0.007204 |
| 16Mar2011  | 20363 | 812.97  | 1.091962 | 2 C.RK+14.01 chrX@1976  | 3.44E-10 | 0.008345 |
| 16Mar2011  | 16256 | 790.4   | 0.002722 | 1 R.GTGQDR chr5@1255    | 3.43E-10 | 0.007705 |
| 16Mar2011  | 23155 | 790.41  | 12.62179 | 1 R.GTGQDR chr5@1255    | 2.31E-10 | 0.007533 |
| 19July2011 | 6738  | 654.34  | -13.7884 | 2 L.FLNSNRIS Splice@chr | 4.70E-11 | 0.002801 |
| 19July2011 | 6618  | 654.34  | -13.7884 | 2 L.FLNSNRIS Splice@chr | 8.36E-11 | 0.003494 |
| 19July2011 | 11121 | 774.08  | 9.821565 | 3 K.LQKDSK+ chr5@2038   | 2.83E-10 | 0.005804 |
| 16Mar2011  | 19344 | 771.41  | -2.5352  | 4 K.AQVGSKI chrX@9831   | 4.19E-11 | 0.001253 |
| 19July2011 | 10689 | 680.38  | 15.03354 | 3 _K+14.016 chr5@1838   | 4.10E-11 | 0.00151  |
| 16Mar2011  | 7167  | 563.32  | 4.667378 | 2 R.K+14.016 Splice@chr | 1.76E-10 | 0.005421 |
| 19July2011 | 10879 | 810.96  | 18.76412 | 2 K.LM+15.9! Splice@chr | 2.50E-10 | 0.004972 |
| 16Mar2011  | 1445  | 441.74  | 4.223836 | 2 R.VDHVVD. Splice@chr  | 2.04E-10 | 0.006308 |
| 19July2011 | 13111 | 616.02  | 3.410344 | 3 K.THRTASIt chr2@8934  | 4.11E-10 | 0.00859  |
| 19July2011 | 10472 | 529.31  | -6.77776 | 3 _RERDESK chr1@1558    | 3.90E-10 | 0.009989 |
| 16Mar2011  | 15726 | 740.46  | 16.31464 | 2 K.KNFSTIPI chr2@1208  | 1.33E-10 | 0.002178 |
| 16Mar2011  | 4558  | 499.26  | -9.88145 | 3 K.VNSSVSS chr4@5523   | 7.63E-11 | 0.001245 |
| 19July2011 | 3931  | 655.85  | -5.77873 | 2 R.FAEFGVK chr1@3906   | 1.86E-10 | 0.00588  |
| 19July2011 | 8102  | 716.39  | -12.262  | 3 K.NNVLFSA chr2@9011   | 2.46E-10 | 0.005244 |
| 17Dec2011  | 5757  | 829.74  | -17.7736 | 3 K.IGRKSSTt chr2@3429  | 6.25E-12 | 0        |
| 19July2011 | 3810  | 801.43  | 1.372569 | 2 G.ETENLSG Splice@chr  | 2.60E-10 | 0.006287 |
| 19July2011 | 3282  | 801.43  | 1.372569 | 2 G.ETENLSG Splice@chr  | 1.56E-10 | 0.003848 |
| 16Mar2011  | 4011  | 563.79  | 15.36187 | 2 K.MGNFFPI chrX@6769   | 2.22E-10 | 0.007799 |
| 19July2011 | 8896  | 770.38  | -6.58444 | 2 K.M+15.99 chr4@8973   | 2.38E-10 | 0.006549 |
| 16Mar2011  | 12408 | 894.49  | -25.9577 | 2 K.RK+14.01 Splice@chr | 1.15E-10 | 0.002601 |
| 19July2011 | 967   | 449.58  | -4.40112 | 3 K.IPNIFQFN chr4@6006  | 6.73E-11 | 0.002724 |

|            |       |         |          |                          |          |          |
|------------|-------|---------|----------|--------------------------|----------|----------|
| 16Mar2011  | 20061 | 914.24  | 13.12755 | 3 _YRFAAFK: Splice@chr   | 2.47E-10 | 0.008209 |
| 19July2011 | 936   | 486.92  | -28.4469 | 3 K.K+14.016 chr4@3356   | 8.28E-11 | 0.002421 |
| 16Mar2011  | 13666 | 553.64  | -11.9279 | 3 K.LTYFLSRR chr1@1058   | 1.46E-10 | 0.003868 |
| 16Mar2011  | 13803 | 1106.02 | -27.2691 | 2 K.FQMGHE chr4@1999     | 4.05E-10 | 0.008718 |
| 16Mar2011  | 19610 | 787.9   | 1.282002 | 2 R.QCRRIKP: chr2@1313   | 3.36E-10 | 0.007535 |
| 19July2011 | 12760 | 937.48  | -10.3998 | 2 S.TRSLTSFA Splice@chr  | 9.01E-11 | 0.00252  |
| 19July2011 | 9016  | 937.48  | -10.3998 | 2 S.TRSLTSFA Splice@chr  | 1.02E-10 | 0.002224 |
| 19July2011 | 9751  | 937.48  | -10.3998 | 2 S.TRSLTSFA Splice@chr  | 2.19E-10 | 0.006386 |
| 19July2011 | 9634  | 937.48  | -10.3998 | 2 S.TRSLTSFA Splice@chr  | 2.54E-10 | 0.006069 |
| 16Mar2011  | 14290 | 913.99  | 18.89775 | 2 R.RHITIVEC chr2@1413   | 2.65E-10 | 0.006594 |
| 16Mar2011  | 11174 | 832.44  | 8.264933 | 2 R.SSLDSTQ chr1@8860    | 4.51E-10 | 0.009987 |
| 19July2011 | 7999  | 539.31  | -16.1759 | 3 K.RRQM+1 chr5@6644     | 2.58E-10 | 0.005218 |
| 19July2011 | 12303 | 840.11  | -1.16382 | 3 K.IK+14.016 chr5@1831  | 2.40E-10 | 0.005982 |
| 16Mar2011  | 16635 | 626.82  | 8.58267  | 2 L.INYADVEI chr3@3558   | 3.89E-10 | 0.009436 |
| 19July2011 | 5829  | 710.37  | -18.5848 | 4 K.IVILPRYS: Splice@chr | 4.75E-11 | 7.76E-04 |
| 19July2011 | 9454  | 597.33  | -0.71647 | 2 K.KSENLIFC chr3@2178   | 2.48E-10 | 0.00614  |
| 16Mar2011  | 21841 | 860.97  | -4.6133  | 2 _TRLKFGSI chr5@1960    | 8.01E-11 | 0.002104 |
| 16Mar2011  | 17700 | 946.96  | -27.9189 | 2 K.MWMNV Splice@chr     | 9.16E-11 | 0.002717 |
| 16Mar2011  | 16086 | 946.96  | -27.9189 | 2 K.MWMNV Splice@chr     | 2.76E-10 | 0.006364 |
| 19July2011 | 5689  | 605.87  | -8.7339  | 2 R.K+14.016 Splice@chr  | 8.34E-11 | 0.003178 |
| 16Mar2011  | 434   | 728.88  | 23.06044 | 2 K.KFKQDYE chr5@4098    | 2.27E-10 | 0.006661 |
| 19July2011 | 1695  | 487.25  | -6.6109  | 3 K.MVQKDC chr5@2040     | 2.60E-10 | 0.005244 |
| 16Mar2011  | 12276 | 697.3   | -21.3879 | 3 K.HK+14.01 chrX@6463   | 3.25E-11 | 0.001035 |
| 16Mar2011  | 14020 | 697.3   | -21.3879 | 3 K.HK+14.01 chrX@6463   | 4.86E-10 | 0.009947 |
| 16Mar2011  | 14932 | 697.3   | -21.3879 | 3 K.HK+14.01 chrX@6463   | 4.27E-10 | 0.009011 |
| 16Mar2011  | 3292  | 454.23  | -12.7934 | 2 K.QFTGTPT chrX@5751    | 3.31E-10 | 0.006865 |
| 16Mar2011  | 2775  | 520.32  | -27.8201 | 2 K.WIVPRVL chr4@8309    | 3.81E-10 | 0.009217 |
| 16Mar2011  | 2859  | 520.32  | -27.8201 | 2 K.WIVPRVL chr4@8309    | 4.02E-10 | 0.008463 |
| 16Mar2011  | 14440 | 1156.89 | 7.624255 | 3 _HTGPGVI Splice@chr    | 4.97E-12 | 3.06E-04 |
| 16Mar2011  | 15486 | 965.76  | 6.091444 | 4 R.KTSSCQK chr5@2085    | 6.88E-11 | 0.002518 |
| 16Mar2011  | 15807 | 965.76  | 6.091444 | 4 R.KTSSCQK chr5@2085    | 8.22E-11 | 0.002807 |
| 16Mar2011  | 14573 | 965.76  | 6.091444 | 4 R.KTSSCQK chr5@2085    | 3.38E-10 | 0.008929 |
| 16Mar2011  | 6377  | 664.88  | 20.10569 | 2 _K+14.016 chr3@8718    | 5.08E-10 | 0.009182 |
| 16Mar2011  | 21495 | 990.04  | -9.47642 | 2 _NK+14.01 chr1@1872    | 1.83E-10 | 0.005251 |
| 16Mar2011  | 18819 | 1013.87 | -26.7428 | 3 K.ACLNVTY chr4@4860    | 3.52E-11 | 9.22E-04 |
| 16Mar2011  | 8938  | 435.23  | 21.08475 | 3 K.VLENNFM chr5@5765    | 1.94E-10 | 0.005458 |
| 16Mar2011  | 17095 | 1043.54 | 10.10502 | 2 T.QPVSHM chr1@6261     | 3.37E-10 | 0.007744 |
| 16Mar2011  | 15387 | 675.36  | -13.1771 | 2 R.NFELSWK chr5@2055    | 3.01E-11 | 7.18E-04 |
| 16Mar2011  | 14410 | 679.36  | 23.75413 | 2 K.SSHK+14. chr2@9111   | 2.09E-10 | 0.005678 |
| 19July2011 | 5740  | 587.32  | -4.78858 | 3 R.RSANSTN chrX@1775    | 2.29E-10 | 0.007554 |
| 16Mar2011  | 18153 | 626.38  | 21.86246 | 2 _KKIDIGRY chr2@7320    | 2.71E-10 | 0.008487 |
| 16Mar2011  | 4586  | 433.22  | -24.2885 | 2 K.FPKSGSSI chrX@9485   | 3.87E-10 | 0.007941 |
| 19July2011 | 7302  | 751.35  | -26.9891 | 3 R.ISIVHSITS chr4@5255  | 4.04E-10 | 0.00879  |
| 16Mar2011  | 6332  | 449.9   | -22.2077 | 3 R.WAFLELF Splice@chr   | 2.06E-10 | 0.005235 |
| 16Mar2011  | 22583 | 697.79  | 20.71319 | 3 _KTKEARF' Splice@chr   | 3.29E-10 | 0.009018 |
| 19July2011 | 5526  | 874.08  | 3.821679 | 3 _ARPLYM+ chr4@3030     | 3.20E-10 | 0.008703 |
| 16Mar2011  | 10563 | 893.43  | -23.0938 | 2 K.NQQTVA chr2@4984     | 2.00E-10 | 0.004729 |

|            |       |         |          |                         |          |          |
|------------|-------|---------|----------|-------------------------|----------|----------|
| 19July2011 | 8973  | 601.35  | 20.74056 | 4 _..RNKRTA\ Splice@chr | 3.44E-10 | 0.008221 |
| 17Dec2011  | 2580  | 742.36  | -19.0704 | 2 H.M+15.99 chr3@2815   | 4.12E-11 | 0.003195 |
| 19July2011 | 8404  | 914.52  | 9.11314  | 3 K.SLFKQPF\ Splice@chr | 1.72E-10 | 0.005458 |
| 19July2011 | 6252  | 631.36  | -5.1334  | 3 K.ILKFAHFS chr5@1040  | 4.59E-10 | 0.00922  |
| 16Mar2011  | 3676  | 444.28  | 18.7265  | 3 R.RRVM+1\ chr4@9300   | 1.99E-10 | 0.004179 |
| 19July2011 | 12409 | 1033.53 | -8.33683 | 3 R.MIPPNFL chrX@1475   | 2.98E-10 | 0.007332 |
| 19July2011 | 16197 | 1020.49 | -10.8361 | 2 _..TSWINCS Splice@chr | 9.51E-11 | 0.003321 |
| 16Mar2011  | 5661  | 443.24  | -16.4927 | 2 ?.KIPPGDM Splice@chr  | 3.97E-10 | 0.005157 |
| 16Mar2011  | 5772  | 443.24  | -16.4927 | 2 ?.KIPPGDM Splice@chr  | 2.61E-10 | 0.003833 |
| 19July2011 | 9704  | 587.66  | 13.31727 | 3 K.NILIGKKY chr1@8408  | 9.99E-11 | 0.002436 |
| 16Mar2011  | 10922 | 881.45  | -1.0739  | 2 R.KESRLDQ chrX@7325   | 2.56E-10 | 0.006453 |
| 19July2011 | 11832 | 803.47  | 0.811306 | 3 K.LQLK+14. chr5@1935  | 1.95E-10 | 0.005876 |
| 19July2011 | 3296  | 702.36  | 19.55301 | 2 R.LQENVEK chr4@7382   | 1.18E-10 | 0.002613 |
| 19July2011 | 3587  | 702.36  | 19.55301 | 2 R.LQENVEK chr4@7382   | 2.94E-10 | 0.005804 |
| 19July2011 | 3631  | 702.36  | 19.55301 | 2 R.LQENVEK chr4@7382   | 2.69E-10 | 0.006628 |
| 16Mar2011  | 10552 | 497.6   | -15.9461 | 3 _..RAM+15. chr3@1375  | 2.51E-10 | 0.005788 |
| 16Mar2011  | 11172 | 675.35  | -13.1239 | 2 R.KSDK+14 chr2@1258   | 2.85E-10 | 0.008039 |
| 16Mar2011  | 2364  | 473.28  | -3.23169 | 3 K.KILEFLEFI chr3@3070 | 2.72E-10 | 0.005627 |
| 16Mar2011  | 3022  | 593.33  | -1.18419 | 2 K.K+14.016 chr2@1028  | 2.99E-10 | 0.006269 |
| 19July2011 | 5125  | 791.89  | 15.40748 | 2 K.SSK+14.0 chr2@1415  | 2.05E-11 | 0.001509 |
| 19July2011 | 5591  | 791.37  | -7.79959 | 2 K.SSK+14.0 chr2@1415  | 2.94E-10 | 0.007332 |
| 16Mar2011  | 13339 | 642.01  | 9.051662 | 3 K.INLDGHT Splice@chr  | 1.14E-12 | 1.85E-04 |
| 19July2011 | 2884  | 667.85  | -15.066  | 2 R.VFRQTAN chrX@1227   | 2.51E-10 | 0.004615 |
| 19July2011 | 1995  | 724.09  | -7.5776  | 4 R.WTWWN chr3@9772     | 1.74E-10 | 0.005779 |
| 16Mar2011  | 18683 | 859.44  | 12.88696 | 1 R.GHEKTM chrX@8661    | 1.07E-10 | 0.003884 |
| 16Mar2011  | 3402  | 559.32  | 15.30515 | 2 K.NSEIMVII chr1@1420  | 2.09E-10 | 0.004562 |
| 19July2011 | 10424 | 700.92  | -21.9749 | 2 V.VFIIDLNV Splice@chr | 3.59E-10 | 0.009322 |
| 16Mar2011  | 17730 | 1034.5  | -4.69627 | 2 K.M+15.99 chrX@4016   | 2.68E-11 | 7.18E-04 |
| 16Mar2011  | 18346 | 927.45  | 16.4047  | 2 K.HHYRFGC chr5@9058   | 1.27E-10 | 0.003874 |
| 16Mar2011  | 20594 | 679.32  | -3.64533 | 2 R.GGFWSS\ chr1@1140   | 3.91E-10 | 0.009438 |
| 19July2011 | 10781 | 946.48  | -3.78722 | 3 K.KKTGGSS chr2@9267   | 2.01E-10 | 0.005481 |
| 19July2011 | 7918  | 911.95  | 29.46575 | 2 K.RPCGHQI chrX@3658   | 4.09E-10 | 0.008037 |
| 16Mar2011  | 13080 | 779.4   | 23.97968 | 3 K.LSVCRFA\ chr1@1041  | 1.44E-10 | 0.003345 |
| 16Mar2011  | 14950 | 778.37  | -26.357  | 2 K.MEILNQ\ Splice@chr  | 1.36E-10 | 0.004866 |
| 16Mar2011  | 4795  | 535.27  | -17.779  | 2 R.QNGFTFL Splice@chr  | 1.01E-10 | 0.002098 |
| 19July2011 | 13494 | 756.91  | 14.85726 | 2 K.RSKHIFFA chr5@8255  | 8.73E-11 | 0.00252  |
| 19July2011 | 10347 | 1132.59 | -27.6769 | 3 R.SHALKRV chr4@1515   | 1.08E-10 | 0.002646 |
| 19July2011 | 1131  | 508.79  | -20.0729 | 2 K.LSVCVLLC chr5@1068  | 2.07E-10 | 0.005298 |
| 16Mar2011  | 6720  | 1047.55 | -8.28148 | 1 _..SWVSTN\ Splice@chr | 2.72E-10 | 0.006354 |
| 16Mar2011  | 6787  | 1047.55 | -8.28148 | 1 _..SWVSTN\ Splice@chr | 1.81E-10 | 0.004117 |
| 16Mar2011  | 6810  | 1047.55 | -8.28148 | 1 _..SWVSTN\ Splice@chr | 3.47E-10 | 0.008544 |
| 19July2011 | 13843 | 1143.56 | 20.96565 | 3 _..ICPGWFN Splice@chr | 8.80E-12 | 4.07E-04 |
| 19July2011 | 12139 | 962.01  | -0.92029 | 2 R.FYFDLNI\ chr2@7834  | 8.55E-11 | 0.002131 |
| 19July2011 | 410   | 516.32  | -4.26393 | 2 R.KITSWKLI chr2@1524  | 3.51E-10 | 0.008221 |
| 16Mar2011  | 18034 | 747.45  | 17.49868 | 2 K.EERKK+1. chr2@1145  | 2.66E-10 | 0.005522 |
| 16Mar2011  | 20750 | 536.27  | 19.38523 | 3 K.LTSSSTM Splice@chr  | 2.21E-10 | 0.004381 |
| 19July2011 | 2472  | 503.26  | 11.60558 | 2 R.LADGTPF chr4@9405   | 1.48E-10 | 0.00317  |

|            |       |         |          |                          |          |          |
|------------|-------|---------|----------|--------------------------|----------|----------|
| 16Mar2011  | 5743  | 530.28  | 6.754638 | 2 K.PADCGAI chr2@3207    | 4.07E-10 | 0.009351 |
| 16Mar2011  | 6007  | 530.28  | 6.754638 | 2 K.PADCGAI chr2@3207    | 2.50E-10 | 0.005853 |
| 17Dec2011  | 426   | 1024.51 | 3.637665 | 1 R.KDGIAYD Splice@chr   | 6.20E-11 | 0.007143 |
| 19July2011 | 319   | 439.22  | -11.1425 | 2 _._PDIFNSGI chr1@1459  | 3.13E-10 | 0.00945  |
| 16Mar2011  | 17406 | 983     | 0.932317 | 2 K.ILFQLLHE Splice@chr  | 2.50E-10 | 0.007106 |
| 16Mar2011  | 20274 | 1028.06 | -8.29308 | 2 K.LFVCVLG chr2@7808    | 3.00E-10 | 0.007561 |
| 16Mar2011  | 14863 | 1028.06 | -8.29308 | 2 K.LFVCVLG chr2@7808    | 4.07E-11 | 0.001645 |
| 16Mar2011  | 19848 | 1028.06 | -8.29308 | 2 K.LFVCVLG chr2@7808    | 4.39E-11 | 8.46E-04 |
| 16Mar2011  | 2274  | 459.74  | 26.97556 | 2 _._ERQNGG chr1@1431    | 3.20E-11 | 5.57E-04 |
| 19July2011 | 1383  | 445.24  | -19.4181 | 3 K.KMEWEK Splice@chr    | 3.71E-10 | 0.009996 |
| 19July2011 | 3886  | 663.33  | -24.5122 | 2 K.TCISISK+ chr2@3000   | 2.90E-10 | 0.006237 |
| 19July2011 | 10159 | 813.12  | -1.0768  | 3 K.KLKISKNF chr5@1973   | 1.37E-10 | 0.00369  |
| 16Mar2011  | 422   | 419.74  | 12.69922 | 2 K.KFGGTAT Splice@chr   | 1.15E-10 | 0.004207 |
| 16Mar2011  | 20525 | 1077.1  | -18.4694 | 2 K.NKENYW chr1@1387     | 2.35E-11 | 7.49E-04 |
| 16Mar2011  | 15861 | 1060.66 | 0.460794 | 2 K.ILNYKLQI chr4@3851   | 2.89E-10 | 0.006914 |
| 16Mar2011  | 5122  | 403.21  | -18.0302 | 4 K.VIENFGSI chr4@1748   | 1.84E-10 | 0.003897 |
| 19July2011 | 1137  | 567.94  | 29.42756 | 3 _._EIVSCDDI Splice@chr | 1.64E-10 | 0.003247 |
| 16Mar2011  | 19029 | 944.76  | 23.82325 | 4 K.K+14.016 Splice@chr  | 3.08E-10 | 0.006942 |
| 16Mar2011  | 19117 | 944.76  | 23.82325 | 4 K.K+14.016 Splice@chr  | 1.24E-10 | 0.003244 |
| 16Mar2011  | 11190 | 613.84  | -26.0933 | 2 R.QITLK+14 chr5@7614   | 3.10E-10 | 0.006287 |
| 19July2011 | 9772  | 857.44  | -3.42079 | 2 G.ILCRSIAE chr5@1014   | 1.65E-10 | 0.003035 |
| 16Mar2011  | 3491  | 600.41  | -23.0807 | 2 K.K+14.016 chr5@9466   | 3.14E-10 | 0.009111 |
| 16Mar2011  | 15458 | 1139.63 | -18.3127 | 2 K.CSK+14.0 chr5@3401   | 1.27E-10 | 0.002587 |
| 16Mar2011  | 16522 | 729.63  | 20.04951 | 4 K.FSFYEVSF chr5@1081   | 2.04E-10 | 0.005079 |
| 16Mar2011  | 15044 | 650.37  | 3.759713 | 2 K.EEKNSN Splice@chr    | 2.34E-10 | 0.004949 |
| 16Mar2011  | 19630 | 1030.07 | 7.151609 | 2 R.FYFEIYKL chr4@1441   | 3.62E-10 | 0.008739 |
| 19July2011 | 833   | 856.05  | -2.18906 | 3 _._WSVSVGI Splice@chr  | 2.09E-11 | 7.38E-04 |
| 16Mar2011  | 6359  | 424.71  | 0.936339 | 2 K.TENSVNC Splice@chr   | 1.73E-10 | 0.003459 |
| 16Mar2011  | 7422  | 424.71  | 0.936339 | 2 K.TENSVNC Splice@chr   | 1.58E-10 | 0.003319 |
| 16Mar2011  | 7517  | 424.71  | 0.936339 | 2 K.TENSVNC Splice@chr   | 4.05E-10 | 0.008681 |
| 16Mar2011  | 6697  | 424.71  | 0.936339 | 2 K.TENSVNC Splice@chr   | 2.30E-10 | 0.006661 |
| 19July2011 | 7778  | 900.46  | 2.139922 | 2 R.KMPFGN chrX@4790     | 3.18E-10 | 0.009715 |
| 17Dec2011  | 181   | 622.32  | -6.09059 | 2 K.AK+14.01 chr1@3483   | 1.02E-10 | 0.006345 |
| 16Mar2011  | 14457 | 898.41  | 20.85933 | 2 R.KYEEMSC chr5@1807    | 4.60E-10 | 0.009096 |
| 16Mar2011  | 8046  | 634.36  | -24.2536 | 2 R.ERKKGHL chr2@7964    | 3.26E-10 | 0.009242 |
| 19July2011 | 12954 | 674.38  | 21.75432 | 4 K.LVDIVWA chrX@1399    | 4.68E-10 | 0.009008 |
| 16Mar2011  | 15797 | 1184.09 | 15.30405 | 2 R.EWLWNC chr3@8385     | 3.98E-10 | 0.009316 |
| 16Mar2011  | 4388  | 675.37  | -25.3136 | 2 _._KLSAEKYI chr1@4994  | 1.59E-10 | 0.004301 |
| 16Mar2011  | 4266  | 675.37  | -25.3136 | 2 _._KLSAEKYI chr1@4994  | 3.73E-11 | 0.001311 |
| 16Mar2011  | 10422 | 1011.56 | -2.6575  | 1 K.NFLLSVYI chr5@9375   | 3.81E-10 | 0.009481 |
| 16Mar2011  | 16019 | 1022.98 | 7.201248 | 2 R.QSRRTFD chr1@1166    | 1.26E-10 | 0.003372 |
| 16Mar2011  | 16123 | 1022.98 | 7.201248 | 2 R.QSRRTFD chr1@1166    | 3.90E-10 | 0.008792 |
| 16Mar2011  | 17671 | 1022.98 | 7.201248 | 2 R.QSRRTFD chr1@1166    | 9.24E-11 | 0.00296  |
| 16Mar2011  | 17615 | 1022.98 | 7.201248 | 2 R.QSRRTFD chr1@1166    | 8.61E-11 | 0.002844 |
| 16Mar2011  | 11382 | 598.88  | 27.23165 | 2 K.RQGDLGI chr2@1207    | 2.34E-10 | 0.006032 |
| 19July2011 | 1071  | 683.36  | -11.2703 | 2 E.EVCNFVN chrX@4262    | 1.59E-10 | 0.005165 |
| 19July2011 | 1145  | 683.36  | -11.2703 | 2 E.EVCNFVN chrX@4262    | 8.19E-11 | 0.003447 |

|            |       |         |          |                          |          |          |
|------------|-------|---------|----------|--------------------------|----------|----------|
| 19July2011 | 1200  | 683.35  | -25.9397 | 2 E.EVCNFVN chrX@4262    | 1.92E-10 | 0.005229 |
| 19July2011 | 1078  | 683.36  | -11.2703 | 2 E.EVCNFVN chrX@4262    | 1.91E-10 | 0.004727 |
| 19July2011 | 7210  | 680.68  | 22.0915  | 3 R.QSSCFRIT Splice@chr  | 2.20E-10 | 0.005495 |
| 16Mar2011  | 7390  | 674.33  | 8.97421  | 2 K.CPEGDM chrX@1042     | 1.84E-10 | 0.005266 |
| 16Mar2011  | 14882 | 1101.91 | -24.1717 | 3 W.SQVTLIT Splice@chr   | 7.81E-12 | 0        |
| 16Mar2011  | 6311  | 493.29  | 0        | 2 K.SPLPVPTI chr5@9847   | 2.36E-11 | 0.00121  |
| 16Mar2011  | 20704 | 872.44  | -27.2448 | 2 _..NYFEFRKI chr5@3835  | 2.66E-10 | 0.005958 |
| 17Dec2011  | 1122  | 481.25  | 11.12071 | 2 R.NTNDSVI chr5@3147    | 1.10E-11 | 0        |
| 17Dec2011  | 1089  | 481.25  | 11.12071 | 2 R.NTNDSVI chr5@3147    | 1.45E-11 | 0        |
| 16Mar2011  | 19639 | 600.99  | -7.79911 | 3 K.QFLTFLT/ chr4@7690   | 1.11E-10 | 0.003884 |
| 16Mar2011  | 10709 | 600.99  | -7.79911 | 3 K.QFLTFLT/ chr4@7690   | 2.63E-10 | 0.006549 |
| 19July2011 | 1831  | 561.96  | 4.465017 | 3 R.VFNGSSS chr1@1486    | 5.62E-11 | 0.003235 |
| 19July2011 | 7852  | 765.73  | 2.156848 | 3 R.ISNIEGDT chrX@5336   | 7.27E-11 | 0.002262 |
| 19July2011 | 9230  | 711.37  | 2.02209  | 2 R.TFKKLECI Splice@chr  | 2.44E-10 | 0.005874 |
| 19July2011 | 1695  | 753.84  | -20.3208 | 2 K.WLCPVSE Splice@chr   | 1.60E-10 | 0.005008 |
| 16Mar2011  | 3423  | 424.22  | 5.768786 | 2 R.DAGSGKI chr4@5141    | 2.30E-10 | 0.006858 |
| 16Mar2011  | 18269 | 937.49  | 8.798693 | 2 _..FEAKM+1 chr2@3135   | 3.85E-10 | 0.00853  |
| 16Mar2011  | 18549 | 911.48  | -12.3346 | 2 K.M+15.99 chr4@1301    | 2.99E-11 | 6.34E-04 |
| 16Mar2011  | 17367 | 911.48  | -12.3346 | 2 K.M+15.99 chr4@1301    | 4.72E-10 | 0.00974  |
| 16Mar2011  | 16635 | 1166.11 | -7.83411 | 2 R.KYAFFKG Splice@chr   | 1.47E-10 | 0.002979 |
| 19July2011 | 4738  | 574.53  | -25.9662 | 4 _..HIK+14.0 Splice@chr | 2.15E-10 | 0.00574  |
| 16Mar2011  | 19994 | 942.13  | -6.13944 | 3 K.QFFNFKEK Splice@chr  | 2.50E-10 | 0.005432 |
| 19July2011 | 4419  | 693.86  | 3.083251 | 2 R.RHK+14.( Splice@chr  | 1.11E-10 | 0.00245  |
| 16Mar2011  | 2914  | 569.29  | -20.1913 | 2 K.KVRNSAF chr3@1616    | 2.31E-10 | 0.006004 |
| 19July2011 | 2386  | 582.79  | -0.78566 | 2 R.QIDEIENI chr3@1234   | 3.86E-10 | 0.00945  |
| 19July2011 | 10237 | 936.96  | 25.74167 | 2 R.EHMLPQI chr3@8215    | 3.20E-10 | 0.005813 |
| 16Mar2011  | 15219 | 1108.59 | -26.6545 | 2 _..K+14.016 chr1@1378  | 1.70E-11 | 0        |
| 17Dec2011  | 1073  | 466.26  | 17.31702 | 2 K.NSENRAI chr3@6685    | 2.29E-10 | 0.005215 |
| 19July2011 | 1033  | 409.22  | 26.98771 | 3 R.KSEMCIT chr4@1565    | 7.85E-11 | 0.003016 |
| 16Mar2011  | 2942  | 589.31  | 19.78307 | 2 R.WRWTW Splice@chr     | 4.04E-10 | 0.009463 |
| 19July2011 | 3066  | 906.99  | -26.2732 | 2 K.NLCFILKN chr2@6551   | 4.76E-10 | 0.009566 |
| 19July2011 | 10478 | 529.31  | 24.24024 | 3 _..RFPQFLTI Splice@chr | 7.18E-11 | 0.002369 |
| 16Mar2011  | 16561 | 876.48  | 20.89383 | 2 K.KEM+15. chrX@1160    | 2.86E-10 | 0.006089 |
| 16Mar2011  | 14402 | 978.52  | 23.06144 | 3 N.FIKMKGT chr1@9902    | 2.52E-10 | 0.005005 |
| 19July2011 | 9555  | 1027.88 | -2.21901 | 3 K.PVYPIFLY chrX@1082   | 5.72E-12 | 0.001286 |
| 19July2011 | 14030 | 747.38  | -13.4928 | 4 _..YGGGSGI Splice@chr  | 9.05E-11 | 0.00252  |
| 19July2011 | 8442  | 933.97  | -26.2133 | 2 K.RKQIFYNI chr3@9048   | 3.38E-10 | 0.007621 |
| 16Mar2011  | 11462 | 567.31  | 1.832237 | 2 K.KLRGSVG chr4@1631    | 1.47E-11 | 5.09E-04 |
| 16Mar2011  | 12815 | 819.42  | -5.36955 | 2 R.RAPCIYPI chr3@4428   | 3.50E-10 | 0.007846 |
| 16Mar2011  | 17109 | 819.42  | -5.36955 | 2 R.RAPCIYPI chr3@4428   | 3.03E-10 | 0.007243 |
| 16Mar2011  | 15603 | 615.31  | 24.9392  | 2 R.VFQGGH chr5@1950     | 1.67E-11 | 0.001122 |
| 16Mar2011  | 5943  | 635.81  | -12.403  | 2 R.NVHVEIE Splice@chr   | 3.38E-11 | 0.001199 |
| 16Mar2011  | 5863  | 612.78  | 9.437637 | 2 R.EYYSHYSI chr4@4986   | 3.08E-12 | 0        |
| 16Mar2011  | 22587 | 862.41  | -27.3996 | 2 R.FWWWR chrX@1158      | 3.82E-11 | 7.74E-04 |
| 16Mar2011  | 17398 | 1128.6  | 22.01284 | 3 K.DFETK+1. Splice@chr  | 2.84E-10 | 0.008039 |
| 19July2011 | 10336 | 801.76  | -1.90546 | 3 R.K+14.016 chr5@1510   | 2.53E-10 | 0.007208 |
| 19July2011 | 9255  | 651.7   | -2.37627 | 3 K.IFYQIFISY chr4@1625  | 4.49E-10 | 0.009092 |

|            |       |         |          |                         |          |          |
|------------|-------|---------|----------|-------------------------|----------|----------|
| 16Mar2011  | 15971 | 891.44  | 12.95528 | 2 _SKPTPDP chr1@1268    | 2.45E-10 | 0.007325 |
| 16Mar2011  | 4252  | 473.58  | -15.5845 | 3 G.SVGSASR chr4@3039   | 3.82E-10 | 0.009217 |
| 16Mar2011  | 20297 | 1070.59 | -15.9778 | 2 _NGNSFILI chrX@1312   | 4.06E-10 | 0.009638 |
| 16Mar2011  | 8023  | 439.24  | -9.33689 | 3 _FFK+14.0 chr4@1371   | 6.51E-11 | 0.002095 |
| 19July2011 | 2377  | 472.23  | 22.04552 | 2 ?.SVHNGDI Splice@chr  | 1.55E-10 | 0.004941 |
| 19July2011 | 10541 | 749.43  | -6.30663 | 3 _NRVFLYN chr3@2064    | 3.89E-11 | 0.001252 |
| 16Mar2011  | 13451 | 648.89  | 13.8139  | 2 K.IITRTFCK chrX@5901  | 2.26E-10 | 0.006163 |
| 19July2011 | 10280 | 744.42  | -5.74706 | 2 E.K+14.016 chr1@1195  | 8.21E-12 | 8.70E-04 |
| 16Mar2011  | 22294 | 1158.28 | 1.406416 | 3 R.WEEVTLN Splice@chr  | 3.19E-10 | 0.007569 |
| 16Mar2011  | 9005  | 973.53  | 12.48933 | 1 K.KNNNNK chrX@9628    | 2.92E-10 | 0.006993 |
| 16Mar2011  | 8566  | 973.53  | 12.48933 | 1 K.KNNNNK chrX@9628    | 2.04E-10 | 0.005671 |
| 16Mar2011  | 8480  | 973.53  | 12.48933 | 1 K.KNNNNK chrX@9628    | 3.62E-10 | 0.007617 |
| 16Mar2011  | 6113  | 973.53  | 12.48933 | 1 K.KNNNNK chrX@9628    | 1.74E-10 | 0.004098 |
| 16Mar2011  | 9048  | 973.53  | 12.48933 | 1 K.KNNNNK chrX@9628    | 2.65E-10 | 0.007516 |
| 16Mar2011  | 9033  | 973.53  | 12.48933 | 1 K.KNNNNK chrX@9628    | 2.14E-10 | 0.004827 |
| 16Mar2011  | 8958  | 973.53  | 12.48933 | 1 K.KNNNNK chrX@9628    | 1.40E-10 | 0.002423 |
| 16Mar2011  | 8100  | 973.53  | 12.48933 | 1 K.KNNNNK chrX@9628    | 2.63E-10 | 0.006594 |
| 19July2011 | 7163  | 700.06  | -20.8177 | 3 K.FQKKWSI chr3@2061   | 2.84E-10 | 0.008389 |
| 17Dec2011  | 2489  | 822.02  | 0.484822 | 2 K.KIKIPVNL chr4@8898  | 2.08E-10 | 0.00534  |
| 16Mar2011  | 4998  | 562.83  | -11.5155 | 2 K.RQERGILI chr1@1844  | 4.17E-11 | 0.001253 |
| 16Mar2011  | 10173 | 674.32  | -9.24612 | 2 K.K+14.016 chr5@1658  | 5.81E-11 | 0.002623 |
| 19July2011 | 4221  | 561.78  | -1.8503  | 2 R.RTEIDFEC Splice@chr | 8.10E-12 | 7.59E-04 |
| 19July2011 | 3704  | 589.8   | -8.81116 | 2 K.KVEMGQ Splice@chr   | 1.38E-10 | 0.004467 |
| 19July2011 | 4104  | 589.8   | -8.81116 | 2 K.KVEMGQ Splice@chr   | 6.02E-11 | 0.002565 |
| 16Mar2011  | 6115  | 625.35  | -10.8511 | 2 K.FQEVRAF chr1@1119   | 3.33E-10 | 0.008168 |
| 16Mar2011  | 18097 | 563.8   | 22.59638 | 4 S.AIPM+15 chr4@7220   | 1.94E-10 | 0.004367 |
| 16Mar2011  | 19417 | 600.31  | -21.2509 | 3 R.LSECKFT/ Splice@chr | 1.03E-10 | 0.002171 |
| 19July2011 | 7517  | 604.82  | 9.198639 | 2 R.AQCASFL chr4@1050   | 2.96E-10 | 0.007743 |
| 16Mar2011  | 7268  | 520.3   | -9.95122 | 3 K.ILYRKADI Splice@chr | 2.41E-11 | 4.21E-04 |
| 19July2011 | 10129 | 923.51  | -26.6276 | 3 K.FRQFVIVI chr4@1139  | 1.89E-10 | 0.00588  |
| 16Mar2011  | 5450  | 590.31  | 26.07303 | 2 _LPCFNFPi chr5@5499   | 1.31E-10 | 0.00292  |
| 16Mar2011  | 5671  | 590.31  | 26.07303 | 2 _LPCFNFPi chr5@5499   | 1.94E-10 | 0.005385 |
| 19July2011 | 1684  | 436.9   | 2.197033 | 3 _NMANLT chr2@2450     | 3.03E-10 | 0.007916 |
| 19July2011 | 1226  | 575.81  | -18.4564 | 4 R.GEGKEK chr1@1354    | 1.19E-10 | 0.002654 |
| 16Mar2011  | 4114  | 415.74  | -1.69243 | 2 R.NAAGISG chrX@4369   | 2.18E-10 | 0.005821 |
| 16Mar2011  | 6591  | 546.29  | 28.17988 | 2 K.SK+14.01 Splice@chr | 2.17E-10 | 0.005594 |
| 16Mar2011  | 21756 | 880.42  | -2.60293 | 2 K.FAGCSST/ Splice@chr | 2.24E-10 | 0.007209 |
| 19July2011 | 4323  | 505.87  | 26.8877  | 5 K.KFHM+19 chr5@2463   | 2.15E-10 | 0.007591 |
| 19July2011 | 9552  | 711.6   | -3.07101 | 4 _GDTGDKi Splice@chr   | 7.51E-11 | 0.001456 |
| 16Mar2011  | 457   | 570.31  | 27.44663 | 2 R.RVDEEPP chr4@3206   | 1.74E-10 | 0.00415  |
| 17Dec2011  | 5665  | 518.29  | -25.1465 | 3 _FAGKIDKI chr1@6492   | 3.00E-11 | 0.003155 |
| 17Dec2011  | 2097  | 509.31  | 16.27063 | 2 K.KNYAPIRI chr2@5609  | 5.95E-11 | 0.009202 |
| 16Mar2011  | 387   | 545.3   | -13.635  | 2 K.RTTGRGF chr1@1219   | 2.34E-10 | 0.005515 |
| 16Mar2011  | 4083  | 587.39  | 27.45317 | 2 R.QKAKTLK chr1@1239   | 2.70E-10 | 0.006251 |
| 16Mar2011  | 17374 | 677.61  | 5.437891 | 4 K.ESIVSVLT chrX@9696  | 1.46E-10 | 0.003473 |
| 19July2011 | 4603  | 506.27  | -16.4284 | 2 _WKAHQV Splice@chr    | 1.00E-10 | 0.00252  |
| 16Mar2011  | 22214 | 935.12  | -14.4618 | 3 K.NFENEM chr3@1363    | 5.08E-10 | 0.009748 |

|            |       |        |          |                          |          |          |
|------------|-------|--------|----------|--------------------------|----------|----------|
| 17Dec2011  | 1411  | 598.64 | -23.8975 | 3 K.QEVLEM- chr1@6829    | 8.52E-11 | 0.001377 |
| 19July2011 | 368   | 598.64 | -23.8975 | 3 K.QEVLEM- chr1@6829    | 5.42E-11 | 0.002801 |
| 19July2011 | 7880  | 703.39 | -4.14305 | 3 F.NRFLISISL chrX@4100  | 2.80E-10 | 0.006878 |
| 19July2011 | 9240  | 774.4  | -17.5986 | 4 K.HFEKCKK chr2@1310    | 4.94E-10 | 0.009344 |
| 19July2011 | 10542 | 946.49 | 3.44292  | 3 R.TFSAICKP chr4@1271   | 3.65E-12 | 5.76E-04 |
| 19July2011 | 1881  | 519.6  | 12.39725 | 3 _TRCCKSG chr4@8669     | 4.14E-11 | 0.001614 |
| 17Dec2011  | 2561  | 544.85 | 28.28264 | 2 R.QKMAKN chr1@1356     | 3.49E-11 | 0.005357 |
| 16Mar2011  | 14124 | 563.32 | -3.58277 | 3 K.IIIDWLQY chr5@4571   | 6.42E-11 | 0.001288 |
| 16Mar2011  | 17337 | 849.93 | -26.098  | 2 K.CIFLELME chr2@8482   | 1.54E-10 | 0.003319 |
| 16Mar2011  | 654   | 718.32 | -23.9094 | 1 _ASDPNSK chr1@2483     | 4.99E-10 | 0.009721 |
| 16Mar2011  | 5706  | 502.32 | 26.96853 | 2 R.LVFEALRI chr3@7316   | 4.20E-10 | 0.009368 |
| 16Mar2011  | 5700  | 548.28 | -17.3978 | 4 K.NNSFSFI chr1@1022    | 3.40E-10 | 0.008037 |
| 16Mar2011  | 21198 | 600.81 | -14.4292 | 4 K.FNLLTLFS Splice@chr  | 8.77E-11 | 0.002748 |
| 16Mar2011  | 14786 | 770.39 | 21.47465 | 2 _SWRSSSR chr2@2251     | 1.30E-10 | 0.003287 |
| 16Mar2011  | 13862 | 769.85 | -28.4193 | 2 _SWRSSSR chr2@2251     | 3.02E-10 | 0.00837  |
| 16Mar2011  | 14938 | 770.39 | 21.47465 | 2 _SWRSSSR chr2@2251     | 1.95E-10 | 0.005458 |
| 19July2011 | 4402  | 618.79 | 3.062723 | 2 K.ICNDVAS chr4@1672    | 4.89E-10 | 0.009978 |
| 19July2011 | 915   | 688.3  | 6.038794 | 2 R.GGDGGA chr3@2778     | 6.21E-16 | 0        |
| 19July2011 | 962   | 688.3  | 6.038794 | 2 R.GGDGGA chr3@2778     | 2.03E-11 | 4.07E-04 |
| 19July2011 | 173   | 688.3  | 6.038794 | 2 R.GGDGGA chr3@2778     | 5.36E-18 | 0        |
| 19July2011 | 825   | 688.3  | 6.038794 | 2 R.GGDGGA chr3@2778     | 4.80E-18 | 0        |
| 19July2011 | 179   | 688.3  | 6.038794 | 2 R.GGDGGA chr3@2778     | 2.21E-16 | 0        |
| 19July2011 | 133   | 688.3  | 6.038794 | 2 R.GGDGGA chr3@2778     | 4.82E-18 | 0        |
| 19July2011 | 172   | 688.3  | 6.038794 | 2 R.GGDGGA chr3@2778     | 1.59E-18 | 0        |
| 19July2011 | 248   | 688.3  | 6.038794 | 2 R.GGDGGA chr3@2778     | 5.52E-18 | 0        |
| 19July2011 | 303   | 688.3  | 6.038794 | 2 R.GGDGGA chr3@2778     | 3.53E-18 | 0        |
| 19July2011 | 203   | 688.3  | 6.038794 | 2 R.GGDGGA chr3@2778     | 1.70E-14 | 0        |
| 19July2011 | 145   | 688.3  | 6.038794 | 2 R.GGDGGA chr3@2778     | 7.47E-19 | 0        |
| 19July2011 | 214   | 688.3  | 6.038794 | 2 R.GGDGGA chr3@2778     | 8.85E-19 | 0        |
| 19July2011 | 219   | 688.3  | 6.038794 | 2 R.GGDGGA chr3@2778     | 9.91E-19 | 0        |
| 19July2011 | 254   | 688.3  | 6.038794 | 2 R.GGDGGA chr3@2778     | 1.09E-17 | 0        |
| 19July2011 | 161   | 688.3  | 6.038794 | 2 R.GGDGGA chr3@2778     | 2.12E-18 | 0        |
| 19July2011 | 1065  | 688.3  | 6.038794 | 2 R.GGDGGA chr3@2778     | 1.09E-16 | 0        |
| 19July2011 | 1110  | 688.3  | 6.038794 | 2 R.GGDGGA chr3@2778     | 3.07E-16 | 0        |
| 19July2011 | 197   | 688.3  | 6.038794 | 2 R.GGDGGA chr3@2778     | 5.39E-18 | 0        |
| 19July2011 | 251   | 688.3  | 6.038794 | 2 R.GGDGGA chr3@2778     | 6.39E-19 | 0        |
| 19July2011 | 12919 | 576.31 | -22.6325 | 3 K.NAENYNI chr3@1204    | 2.38E-11 | 7.86E-04 |
| 16Mar2011  | 3174  | 557.84 | 24.08391 | 2 R.EVIKHFN' chrX@9231   | 8.28E-11 | 0.001761 |
| 16Mar2011  | 2961  | 557.84 | 24.08391 | 2 R.EVIKHFN' chrX@9231   | 3.04E-10 | 0.006715 |
| 16Mar2011  | 8361  | 885.58 | 22.31512 | 1 K.SSIVPLIR. Splice@chr | 6.39E-10 | 0.007308 |
| 17Dec2011  | 3589  | 488.29 | -27.1135 | 3 K.FPIKTSSK chr3@8508   | 8.30E-11 | 0.008906 |
| 16Mar2011  | 22117 | 888.92 | 9.005032 | 2 R.ICRFSSST chr1@1727   | 9.59E-12 | 6.89E-04 |
| 16Mar2011  | 5041  | 744.38 | -27.5047 | 1 K.DGNAVLf chr5@8904    | 1.70E-10 | 0.004624 |
| 16Mar2011  | 4877  | 744.38 | -27.5047 | 1 K.DGNAVLf chr5@8904    | 3.80E-10 | 0.009168 |
| 16Mar2011  | 16603 | 659.34 | 5.470026 | 2 R.DKK+14.( chr5@3740   | 1.32E-10 | 0.00405  |
| 16Mar2011  | 3454  | 615.38 | -4.86791 | 1 K.LGGGALK chrX@6376    | 7.59E-10 | 0.007886 |
| 19July2011 | 10908 | 763.11 | -23.3851 | 4 K.QFDFKAL chr2@7527    | 8.07E-11 | 0.00436  |

|            |       |         |          |                          |          |          |
|------------|-------|---------|----------|--------------------------|----------|----------|
| 16Mar2011  | 2695  | 608.27  | 3.316799 | 1 R.FGAGAD chr1@3416     | 2.16E-10 | 0.004827 |
| 16Mar2011  | 7470  | 628.86  | -16.3315 | 2 R.KSK+14.0 chrX@1346   | 2.53E-10 | 0.005401 |
| 16Mar2011  | 7298  | 629.37  | -3.06044 | 2 R.KSK+14.0 chrX@1346   | 3.25E-11 | 3.69E-04 |
| 19July2011 | 4011  | 483.94  | 3.033238 | 3 K.CGVELPV Splice@chr   | 1.94E-10 | 0.005162 |
| 19July2011 | 12157 | 701.82  | 15.646   | 2 R.IEVEGTG Splice@chr   | 1.04E-10 | 0.003638 |
| 16Mar2011  | 1054  | 534.3   | 26.55305 | 2 K.KNVGAEF chr2@1431    | 3.72E-10 | 0.007704 |
| 16Mar2011  | 2096  | 557.34  | 16.85789 | 2 K.SQVLPK+ Splice@chr   | 7.82E-11 | 0.002215 |
| 19July2011 | 8562  | 564.31  | -18.7085 | 3 K.LTQIKMN Splice@chr   | 3.92E-10 | 0.009393 |
| 19July2011 | 5000  | 564.31  | -18.7085 | 3 K.LTQIKMN Splice@chr   | 3.89E-10 | 0.009656 |
| 16Mar2011  | 8003  | 872.51  | 3.991978 | 1 R.NTGGRL chr5@6034     | 4.59E-10 | 0.009273 |
| 16Mar2011  | 7771  | 872.51  | 3.991978 | 1 R.NTGGRL chr5@6034     | 1.02E-10 | 0.003557 |
| 19July2011 | 10899 | 1099.04 | 10.45027 | 2 K.NK+14.0 chr3@1147    | 2.14E-10 | 0.006454 |
| 19July2011 | 9964  | 647.34  | -17.3577 | 4 _YKWKNK+ chr4@1598     | 2.62E-10 | 0.007097 |
| 16Mar2011  | 12509 | 828.52  | -12.9074 | 2 K.LK+14.01 chrX@9130   | 3.16E-10 | 0.007144 |
| 17Dec2011  | 1578  | 1046.55 | -9.80717 | 1 K.HRTMMT chr5@1925     | 7.59E-11 | 0.005263 |
| 16Mar2011  | 21100 | 1129.63 | -22.3884 | 2 K.FK+14.01 chr1@9291   | 2.42E-10 | 0.005226 |
| 19July2011 | 8578  | 850.17  | -29.3117 | 3 K.RNIKK+14 chrX@1394   | 2.28E-10 | 0.005396 |
| 16Mar2011  | 18347 | 839.44  | 1.858713 | 2 K.MYIRSFLI chr4@1604   | 1.64E-10 | 0.004411 |
| 19July2011 | 1427  | 546.77  | -18.0756 | 2 _WTQTNG chr5@9629      | 1.98E-10 | 0.005322 |
| 16Mar2011  | 16558 | 821.9   | 27.88286 | 2 K.FTFEM+1 chrX@1270    | 1.14E-10 | 0.003133 |
| 16Mar2011  | 5606  | 443.24  | -8.14288 | 2 R.QIPTGNC Splice@chr   | 8.20E-10 | 0.008464 |
| 19July2011 | 10858 | 1074.86 | -23.5681 | 3 R.QFSNLPE chr1@2901    | 6.68E-12 | 2.27E-04 |
| 16Mar2011  | 13860 | 1120.57 | -6.43296 | 2 K.YNFVRLV chrX@7452    | 3.26E-10 | 0.006874 |
| 16Mar2011  | 14677 | 1120.57 | -6.43296 | 2 K.YNFVRLV chrX@7452    | 2.89E-10 | 0.006041 |
| 19July2011 | 5188  | 479.77  | -27.0262 | 4 K.TFSLSK+1 chr5@5311   | 4.01E-10 | 0.007713 |
| 19July2011 | 2544  | 524.8   | -22.2559 | 2 R.VLEPAIAI chr4@1232   | 1.47E-10 | 0.003695 |
| 16Mar2011  | 2651  | 530.33  | 26.27046 | 3 K.ELLGDTTI chr5@6669   | 2.85E-10 | 0.006771 |
| 16Mar2011  | 15497 | 677.36  | 1.467767 | 4 _TDLLSM+ chrX@1352     | 2.99E-10 | 0.007163 |
| 19July2011 | 9450  | 614.07  | -14.3162 | 4 K.FCKK+14. chr2@5642   | 2.86E-10 | 0.006929 |
| 16Mar2011  | 20202 | 1139.64 | -16.2748 | 2 K.FK+14.01 chr1@1077   | 1.98E-10 | 0.006265 |
| 19July2011 | 8567  | 955.51  | -18.5842 | 2 D.NVHRILLI chr4@1194   | 2.02E-10 | 0.0042   |
| 19July2011 | 13773 | 955.01  | -16.8259 | 2 D.NVHRILLI chr4@1194   | 1.79E-10 | 0.005779 |
| 16Mar2011  | 13298 | 1134.53 | -14.4304 | 1 K.EEQLMNI chr5@9036    | 2.26E-10 | 0.004583 |
| 16Mar2011  | 15774 | 615.38  | 12.319   | 2 R.FPIQLQSI chr5@1645   | 1.65E-10 | 0.003605 |
| 17Dec2011  | 912   | 1027.51 | 27.55947 | 1 R.YTYTSTI chrX@2515    | 5.47E-12 | 0        |
| 16Mar2011  | 20642 | 891.49  | 26.55868 | 1 K.GRERNM chrX@4408     | 1.16E-10 | 0.001904 |
| 16Mar2011  | 16573 | 668.85  | -7.08652 | 2 R.IEFLIAVCI Splice@chr | 1.34E-11 | 5.38E-04 |
| 16Mar2011  | 16874 | 982.55  | 28.07617 | 1 K.GTFCK+1 chr5@1778    | 1.85E-10 | 0.004039 |
| 19July2011 | 11516 | 614.02  | 1.628302 | 3 R.FPRIVVVI chr5@7111   | 3.36E-10 | 0.008985 |
| 17Dec2011  | 2213  | 1274.68 | 18.4977  | 1 R.NLESRRN chr2@9675    | 3.50E-11 | 0.006289 |
| 16Mar2011  | 2723  | 825.43  | 13.71575 | 1 K.LASGGYE chr2@3971    | 3.15E-10 | 0.009111 |
| 16Mar2011  | 808   | 437.75  | -8.66449 | 2 _LKVGENS chr2@1197     | 9.38E-11 | 0.002933 |
| 19July2011 | 9594  | 762.4   | -17.8492 | 3 R.HILRQNA chr3@3082    | 3.84E-10 | 0.007978 |
| 16Mar2011  | 12063 | 1097.52 | -17.5892 | 2 _TLQVGM chr2@4481      | 2.52E-10 | 0.005792 |
| 16Mar2011  | 3185  | 430.27  | 12.98651 | 3 K.K+14.016 chr2@3678   | 3.21E-10 | 0.007936 |
| 19July2011 | 4895  | 623.3   | -22.6237 | 2 K.CDSAK+1 chrX@1365    | 1.97E-10 | 0.005537 |
| 19July2011 | 4631  | 527.25  | -28.8789 | 2 L.QGGMIFI chr4@9899    | 3.40E-10 | 0.008738 |

|            |       |         |          |                         |          |          |
|------------|-------|---------|----------|-------------------------|----------|----------|
| 19July2011 | 11869 | 858.12  | 26.96567 | 3 R.IVNCELK chrX@1114   | 2.68E-10 | 0.006803 |
| 19July2011 | 4395  | 578.82  | -28.0972 | 4 _K+14.016 chr1@6107   | 2.57E-11 | 2.62E-04 |
| 19July2011 | 10062 | 854.95  | -29.713  | 2 R.DITSSNV chr1@4966   | 2.74E-10 | 0.006115 |
| 19July2011 | 8990  | 860.99  | -1.59656 | 2 _K+14.016 chr4@6178   | 2.70E-10 | 0.006815 |
| 16Mar2011  | 8784  | 608.82  | -0.40167 | 2 R.GLPGDN Splice@chr   | 6.63E-11 | 0.002271 |
| 16Mar2011  | 22315 | 850.96  | -23.5532 | 2 _RM+15.9 Splice@chr   | 4.70E-10 | 0.009581 |
| 17Dec2011  | 2982  | 995.12  | 28.35074 | 2 K.RRFK+14. chr4@3699  | 4.84E-13 | 0        |
| 16Mar2011  | 19774 | 983.53  | -16.6481 | 2 R.IKMPFSN Splice@chr  | 1.96E-10 | 0.006242 |
| 19July2011 | 9313  | 819.44  | -25.7528 | 3 K.TK+14.01 chr1@1041  | 3.15E-10 | 0.00945  |
| 16Mar2011  | 4806  | 403.21  | -24.735  | 2 R.NGAFAI chr5@3394    | 3.06E-10 | 0.006119 |
| 16Mar2011  | 6979  | 506.3   | 25.15242 | 2 _VLASGVA Splice@chr   | 3.74E-10 | 0.008161 |
| 16Mar2011  | 17346 | 783.42  | 22.62311 | 2 R.M+15.99 Splice@chr  | 4.59E-10 | 0.00965  |
| 16Mar2011  | 8265  | 1105.69 | 1.052675 | 1 K.FIILMIIN chrX@1344  | 4.12E-10 | 0.005256 |
| 16Mar2011  | 15386 | 806.42  | -0.71904 | 2 K.NLHRMK Splice@chr   | 6.86E-11 | 0.001459 |
| 19July2011 | 1535  | 419.22  | -29.5502 | 3 R.LTFGFGG Splice@chr  | 3.60E-10 | 0.009326 |
| 16Mar2011  | 21983 | 946.49  | -4.77701 | 2 R.RFSRLNP chr3@6735   | 1.66E-10 | 0.005384 |
| 16Mar2011  | 360   | 449.25  | -7.35873 | 2 R.KKYGASS chr4@1090   | 9.09E-11 | 0.003008 |
| 19July2011 | 5348  | 596.67  | -6.48948 | 3 K.ILQKITKF chr3@1697  | 4.45E-10 | 0.008986 |
| 16Mar2011  | 7909  | 677.31  | 0.902484 | 2 K.EMPEHQ Splice@chr   | 4.92E-11 | 0.001149 |
| 16Mar2011  | 2741  | 473.26  | -12.1989 | 3 Q.PSGSRSS chr2@1149   | 1.58E-10 | 0.00372  |
| 16Mar2011  | 5198  | 503.75  | 10.08888 | 2 K.TPTGCER chr4@4019   | 9.64E-11 | 0.001116 |
| 17Dec2011  | 2993  | 851.54  | 22.80645 | 3 K.FKFSRKIL chr5@4605  | 4.89E-11 | 0.007143 |
| 16Mar2011  | 7599  | 907.45  | 28.87098 | 2 K.LINQDSEI Splice@chr | 1.71E-10 | 0.003083 |
| 17Dec2011  | 156   | 1002.5  | -8.96556 | 1 K.NYSTKFKI chr5@1905  | 2.31E-10 | 0.006596 |
| 17Dec2011  | 2514  | 887.56  | 26.76356 | 2 K.IKFAKK+1 chr5@1044  | 9.48E-11 | 0.003436 |
| 16Mar2011  | 5700  | 564.32  | -22.6447 | 2 K.IFVLKHEI chr5@1811  | 1.99E-10 | 0.005168 |
| 16Mar2011  | 23251 | 960.55  | 18.78678 | 1 R.RWTGQR chr3@7849    | 3.42E-10 | 0.009334 |
| 19July2011 | 14337 | 651.04  | 26.65057 | 3 R.FSFVPAP chr1@6052   | 2.55E-10 | 0.006287 |
| 16Mar2011  | 5356  | 531.3   | 5.93518  | 2 R.IISTKNCP chr2@2631  | 2.62E-10 | 0.005792 |
| 16Mar2011  | 5299  | 531.3   | 5.93518  | 2 R.IISTKNCP chr2@2631  | 2.55E-10 | 0.005792 |
| 16Mar2011  | 7647  | 531.3   | 5.93518  | 2 R.IISTKNCP chr2@2631  | 4.89E-10 | 0.009954 |
| 16Mar2011  | 2071  | 818.47  | -6.27683 | 1 K.KMLGNV chrX@1757    | 4.93E-10 | 0.009954 |
| 19July2011 | 674   | 570.79  | -16.8176 | 2 R.HLSGSAL chrX@1534   | 3.78E-10 | 0.009483 |
| 16Mar2011  | 11976 | 1191.66 | 6.253997 | 1 R.HVLAGVS chr1@8845   | 3.70E-10 | 0.007899 |
| 19July2011 | 10418 | 594     | 4.292288 | 3 _VLLVIIYL chr1@6000   | 2.12E-10 | 0.004955 |
| 19July2011 | 11124 | 490.62  | -15.0421 | 3 _RLEQQD chr5@1644     | 3.97E-10 | 0.007978 |
| 16Mar2011  | 18379 | 649.34  | -17.4749 | 2 K.MMDLM Splice@chr    | 3.69E-10 | 0.009338 |
| 16Mar2011  | 17687 | 827.44  | 8.758367 | 2 ?.YKKNNSE Splice@chr  | 4.39E-10 | 0.009615 |
| 16Mar2011  | 17723 | 827.44  | 8.758367 | 2 ?.YKKNNSE Splice@chr  | 4.33E-10 | 0.009122 |
| 16Mar2011  | 18969 | 1004.81 | -15.8742 | 3 N.NFFEFSSI chr4@8815  | 1.56E-10 | 0.00372  |
| 16Mar2011  | 5625  | 491.26  | -25.7288 | 3 K.IIQYSEVR chr5@9639  | 3.23E-11 | 0.001311 |
| 16Mar2011  | 6709  | 696.35  | -27.6235 | 2 K.KGRM+1 chr1@5262    | 7.30E-11 | 0.002902 |
| 16Mar2011  | 19435 | 1139.61 | 4.61008  | 2 _PYVK+14. Splice@chr  | 2.40E-10 | 0.005226 |
| 19July2011 | 10961 | 907.01  | 19.38047 | 2 S.CQLENHS Splice@chr  | 3.16E-10 | 0.006597 |
| 19July2011 | 1982  | 487.27  | 2.326714 | 2 R.SSYLPLHF Splice@chr | 3.54E-10 | 0.008424 |
| 19July2011 | 404   | 446.24  | -0.75397 | 2 K.TAAAFWI chr4@4766   | 4.11E-10 | 0.009554 |
| 17Dec2011  | 2734  | 765.48  | 6.786413 | 2 K.IGK+14.0 chr1@4780  | 1.27E-10 | 0.007009 |

|            |       |         |          |                         |          |          |
|------------|-------|---------|----------|-------------------------|----------|----------|
| 19July2011 | 13362 | 786.42  | 7.490315 | 3 K.TSKANK+ chr2@2378   | 3.72E-10 | 0.009589 |
| 19July2011 | 6412  | 705.61  | 10.33441 | 4 R.NEGRM+ chr4@3503    | 1.72E-10 | 0.005458 |
| 19July2011 | 6582  | 705.61  | 10.33441 | 4 R.NEGRM+ chr4@3503    | 8.92E-12 | 2.74E-04 |
| 19July2011 | 7415  | 705.61  | 10.33441 | 4 R.NEGRM+ chr4@3503    | 4.58E-10 | 0.00886  |
| 16Mar2011  | 12005 | 643.86  | 14.81153 | 2 K.ILFQHLEH chrX@5313  | 3.56E-10 | 0.009529 |
| 16Mar2011  | 11748 | 643.86  | 14.81153 | 2 K.ILFQHLEH chrX@5313  | 4.33E-10 | 0.008794 |
| 19July2011 | 8851  | 763.92  | -6.24018 | 2 R.YRVFLWI chrX@1214   | 4.64E-10 | 0.00922  |
| 16Mar2011  | 18786 | 1070.58 | 11.90479 | 2 R.KSTENMI chr1@1074   | 1.75E-10 | 0.004537 |
| 19July2011 | 4409  | 460.24  | -20.9103 | 3 K.KNQETAf chr2@6188   | 1.54E-10 | 0.004941 |
| 16Mar2011  | 3704  | 479.26  | -27.2464 | 2 R.RHYAAIA chrX@1423   | 2.16E-11 | 7.39E-04 |
| 16Mar2011  | 21948 | 1089.06 | -12.8788 | 2 K.PK+14.01 chr2@7841  | 2.87E-10 | 0.007561 |
| 19July2011 | 12036 | 729.74  | -11.2789 | 3 K.K+14.016 Splice@chr | 2.96E-10 | 0.007332 |
| 19July2011 | 11994 | 729.73  | -25.0146 | 3 K.K+14.016 Splice@chr | 8.54E-11 | 0.002155 |
| 19July2011 | 1965  | 480.29  | 1.082451 | 2 R.KMQKSPI chr3@1227   | 3.99E-10 | 0.009393 |
| 16Mar2011  | 21044 | 928.45  | 27.83849 | 2 K.FSK+14.0 chrX@8840  | 2.23E-10 | 0.007209 |
| 16Mar2011  | 12583 | 854.99  | -4.89738 | 2 _LK+14.01 chr2@1466   | 4.20E-10 | 0.009112 |
| 16Mar2011  | 1134  | 512     | 6.370409 | 3 R.FVK+14.0 chr4@1036  | 9.43E-11 | 0.002238 |
| 16Mar2011  | 3059  | 419.21  | 29.38476 | 3 K.NVSMEM chr2@1443    | 1.06E-10 | 0.002173 |
| 16Mar2011  | 15881 | 749.87  | -13.1219 | 2 R.KDYCIGV chr5@1477   | 3.82E-10 | 0.008571 |
| 19July2011 | 221   | 452.25  | 21.73229 | 3 R.FM+15.9 chr2@3791   | 2.74E-10 | 0.006965 |
| 16Mar2011  | 8439  | 479.29  | -11.2665 | 4 R.TILADINC chr2@1520  | 3.14E-10 | 0.008146 |
| 16Mar2011  | 16607 | 842.92  | -18.1236 | 2 R.KSIHTM+ chrX@1154   | 1.96E-10 | 0.007137 |
| 16Mar2011  | 5586  | 616.33  | 27.77458 | 2 K.LQSPCSM Splice@chr  | 1.47E-10 | 0.003892 |
| 16Mar2011  | 18294 | 983.54  | -8.44828 | 4 D.EYCVQQI Splice@chr  | 4.11E-10 | 0.008143 |
| 16Mar2011  | 15765 | 1153.06 | -4.42476 | 2 K.M+15.99 chr1@1302   | 4.46E-10 | 0.009706 |
| 19July2011 | 75    | 457.74  | -13.831  | 2 K.KNHSFGF chr2@3491   | 1.73E-10 | 0.005458 |
| 16Mar2011  | 18553 | 915.37  | -29.0175 | 2 K.M+15.99 chr3@7839   | 3.62E-10 | 0.007367 |
| 16Mar2011  | 6187  | 500.78  | -26.867  | 2 R.EKNGSLK chrX@2630   | 1.16E-10 | 0.002419 |
| 19July2011 | 1069  | 508.79  | -1.80299 | 2 K.SLVEKDV Splice@chr  | 5.69E-11 | 0.00206  |
| 19July2011 | 264   | 508.79  | -1.80299 | 2 K.SLVEKDV Splice@chr  | 9.64E-12 | 2.74E-04 |
| 19July2011 | 206   | 508.79  | -1.80299 | 2 K.SLVEKDV Splice@chr  | 1.89E-10 | 0.00511  |
| 16Mar2011  | 1536  | 577.79  | 19.43714 | 2 R.ERTKWTI chr5@1029   | 2.02E-10 | 0.003491 |
| 19July2011 | 11899 | 805.07  | -5.6678  | 3 K.LLMPFDS chr1@1117   | 1.28E-10 | 0.002491 |
| 19July2011 | 14885 | 923.5   | 12.6153  | 3 R.ANFEK+1 chr2@3639   | 4.56E-11 | 0.002242 |
| 19July2011 | 9507  | 809.44  | -3.22125 | 3 K.LTHLKNT chr2@5779   | 3.22E-10 | 0.008102 |
| 19July2011 | 418   | 667.83  | -5.76644 | 2 R.RREDKSD chr4@1482   | 9.46E-11 | 0.002997 |
| 19July2011 | 14190 | 786.42  | -1.76145 | 3 P.LLWPRPF chr1@1368   | 3.43E-10 | 0.00935  |
| 16Mar2011  | 365   | 417     | 7.849682 | 4 K.KMRGKG Splice@chr   | 6.41E-11 | 0.002219 |
| 19July2011 | 8704  | 802.41  | 17.72005 | 2 K.IFDLNYA Splice@chr  | 2.26E-10 | 0.004835 |
| 19July2011 | 9220  | 556.33  | 4.176577 | 2 R.RADSILLI chrX@5430  | 3.83E-10 | 0.007978 |
| 19July2011 | 5882  | 530.62  | 2.038637 | 3 K.ILSSESG chr5@6964   | 8.60E-11 | 0.002607 |
| 16Mar2011  | 1043  | 500.25  | 23.37701 | 2 _HGPETSC Splice@chr   | 3.05E-11 | 2.69E-04 |
| 16Mar2011  | 8684  | 674.99  | -20.5867 | 3 _TIWELSG chr5@1397    | 4.28E-10 | 0.009899 |
| 16Mar2011  | 18000 | 1082.56 | 8.690745 | 2 L.CNRSETA chr3@4794   | 4.53E-10 | 0.008794 |
| 19July2011 | 12604 | 758.42  | 0.504524 | 4 K.NFGGKFk chr4@5454   | 3.14E-10 | 0.0075   |
| 19July2011 | 9343  | 845.79  | 23.21674 | 3 R.GQCK+14 Splice@chr  | 3.69E-10 | 0.008984 |
| 16Mar2011  | 10660 | 754.39  | -14.4529 | 3 _HK+14.01 chr5@1477   | 2.30E-10 | 0.005423 |

|            |       |         |          |                         |          |          |
|------------|-------|---------|----------|-------------------------|----------|----------|
| 17Dec2011  | 1973  | 907.47  | 13.34933 | 1 R.GHAHET\ chr4@5794   | 1.05E-11 | 0        |
| 16Mar2011  | 13997 | 963.45  | 2.697749 | 2 R.SRCGKGV chr4@9947   | 1.44E-10 | 0.004355 |
| 16Mar2011  | 19906 | 953.52  | 4.200471 | 2 R.K+14.016 chr1@8526  | 1.70E-10 | 0.004256 |
| 16Mar2011  | 6657  | 559.32  | -24.6715 | 2 _LSAKVCG chr4@7051    | 3.64E-10 | 0.008265 |
| 17Dec2011  | 4803  | 770.37  | -28.9554 | 2 F.LENIQHSL chr5@9612  | 2.58E-10 | 0.009021 |
| 16Mar2011  | 1384  | 407.27  | -8.49611 | 2 K.KVKGGV chrX@2503    | 1.11E-10 | 0.003372 |
| 16Mar2011  | 1396  | 407.27  | -8.49611 | 2 K.KVKGGV chrX@2503    | 1.62E-10 | 0.003107 |
| 16Mar2011  | 15226 | 769.98  | -14.6043 | 2 R.SK+14.01 chrX@1338  | 1.76E-10 | 0.004503 |
| 17Dec2011  | 3613  | 856.54  | 5.207974 | 2 K.SRRVNSR Splice@chr  | 2.90E-10 | 0.007702 |
| 16Mar2011  | 15032 | 769.9   | 1.153168 | 2 R.LVM+15. chr1@4214   | 2.75E-10 | 0.006    |
| 16Mar2011  | 3791  | 510.3   | 12.82338 | 2 N.RHVSFV chrX@6933    | 7.49E-10 | 0.007786 |
| 16Mar2011  | 3002  | 1140.51 | 14.35509 | 1 K.YWCHSY Splice@chr   | 2.37E-10 | 0.007636 |
| 19July2011 | 10961 | 746.13  | -19.3983 | 4 R.NFSIFHE chr3@1415   | 3.70E-11 | 8.44E-04 |
| 16Mar2011  | 10416 | 741.44  | 29.49167 | 2 K.M+15.99 chr4@4789   | 3.41E-10 | 0.008457 |
| 16Mar2011  | 7153  | 454.92  | -25.1891 | 3 K.KLENFVN chr2@3484   | 8.17E-11 | 0.003367 |
| 16Mar2011  | 20711 | 1008.5  | -22.758  | 2 E.CLVVNLS Splice@chr  | 2.55E-10 | 0.008086 |
| 16Mar2011  | 18077 | 1008.5  | -22.758  | 2 E.CLVVNLS Splice@chr  | 1.04E-10 | 0.003016 |
| 19July2011 | 5418  | 781.42  | -3.75401 | 2 K.QDFWTK chr3@5293    | 2.34E-10 | 0.007743 |
| 17Dec2011  | 2032  | 599.88  | -4.89198 | 2 K.SRRRRRR chrX@8017   | 5.57E-11 | 0.009259 |
| 16Mar2011  | 18718 | 853.45  | -18.6157 | 2 _LVRK+14. chr4@5509   | 3.04E-10 | 0.007163 |
| 19July2011 | 8104  | 600.64  | 17.71137 | 3 R.RSMIGSC chr1@1005   | 2.99E-10 | 0.009058 |
| 16Mar2011  | 21917 | 1106.57 | -9.58176 | 2 _CNLLFFLY chr2@1431   | 2.88E-10 | 0.006041 |
| 16Mar2011  | 4959  | 563.33  | -16.9997 | 2 R.LTTSKFA Splice@chr  | 1.58E-10 | 0.00365  |
| 16Mar2011  | 10418 | 600.34  | 5.862452 | 2 R.SGMSLIH chr3@1267   | 3.59E-10 | 0.007617 |
| 19July2011 | 3349  | 595.33  | 4.518692 | 2 K.ENLSLFEI Splice@chr | 2.99E-10 | 0.00771  |
| 16Mar2011  | 13615 | 921.49  | -5.60487 | 2 R.RKRMTSF Splice@chr  | 5.49E-10 | 0.006338 |
| 19July2011 | 13823 | 655.34  | 15.76432 | 2 _WLFK+14 Splice@chr   | 2.54E-10 | 0.006026 |
| 16Mar2011  | 18406 | 1002.52 | -25.6986 | 2 K.M+15.99 chr2@1026   | 6.33E-11 | 0.002219 |
| 16Mar2011  | 19978 | 948     | 4.382728 | 2 K.EVLNQM Splice@chr   | 3.26E-12 | 0        |
| 16Mar2011  | 21388 | 948.5   | 2.611434 | 2 K.EVLNQM Splice@chr   | 4.87E-17 | 0        |
| 16Mar2011  | 21361 | 948     | 4.382728 | 2 K.EVLNQM Splice@chr   | 2.39E-17 | 0        |
| 16Mar2011  | 21950 | 948.5   | 2.611434 | 2 K.EVLNQM Splice@chr   | 1.11E-19 | 0        |
| 16Mar2011  | 18982 | 748.93  | 16.04809 | 2 K.QWK+14. chr4@8492   | 3.08E-10 | 0.008835 |
| 19July2011 | 15520 | 862.43  | -21.7986 | 2 R.SCWKK+1 chr5@6313   | 3.38E-10 | 0.009216 |
| 16Mar2011  | 16946 | 892     | -11.0288 | 2 L.EEAVVVE chr4@5938   | 4.31E-10 | 0.009011 |
| 16Mar2011  | 20555 | 984.83  | 9.595428 | 3 K.CNKM+1 chr1@2736    | 2.48E-10 | 0.006368 |
| 17Dec2011  | 5611  | 999.63  | -5.35918 | 3 _KTWSDTI chr2@4434    | 2.10E-10 | 0.005766 |
| 19July2011 | 14142 | 767.72  | 29.23007 | 3 R.TTDRFFIS chrX@3035  | 2.35E-10 | 0.005592 |
| 19July2011 | 5368  | 547.98  | -21.3245 | 3 K.K+14.016 Splice@chr | 2.50E-10 | 0.007543 |
| 16Mar2011  | 19426 | 778.43  | 1.024709 | 1 R.PLATGYR Splice@chr  | 3.34E-10 | 0.007671 |
| 16Mar2011  | 15218 | 868.43  | -16.1131 | 2 K.SISFKSDL chr4@2430  | 3.17E-11 | 4.54E-04 |
| 16Mar2011  | 1859  | 932.51  | -27.8088 | 1 _RSALSEIR chr5@5044   | 3.66E-10 | 0.00922  |
| 17Dec2011  | 2456  | 1099.69 | 24.66617 | 1 R.GLAIRLW chr2@3355   | 4.53E-11 | 0.002045 |
| 19July2011 | 4075  | 589.65  | -18.1796 | 3 F.SKNLFSN chr3@1121   | 3.42E-10 | 0.006926 |
| 19July2011 | 9836  | 832.19  | -7.32633 | 4 K.TSIDINVK Splice@chr | 1.63E-10 | 0.003906 |
| 19July2011 | 11705 | 1059.59 | -24.2155 | 2 A.NWPFRK Splice@chr   | 3.70E-10 | 0.009926 |
| 19July2011 | 276   | 512.26  | 1.074454 | 2 R.FSSGSSP chr4@3219   | 1.72E-12 | 2.74E-04 |

|            |       |         |          |                          |          |          |
|------------|-------|---------|----------|--------------------------|----------|----------|
| 19July2011 | 1272  | 512.26  | 1.074454 | 2 R.FSSGSSP chr4@3219    | 2.54E-11 | 7.86E-04 |
| 16Mar2011  | 6024  | 472.29  | 6.873603 | 2 R.LGDNLGI chr2@6974    | 2.29E-10 | 0.005281 |
| 17Dec2011  | 5742  | 760.38  | 21.94308 | 2 Y.CSRQAAA chr5@4505    | 2.46E-11 | 0.008333 |
| 17Dec2011  | 3843  | 760.38  | 21.94308 | 2 Y.CSRQAAA chr5@4505    | 3.45E-11 | 0.007937 |
| 19July2011 | 9139  | 1082.54 | -7.19763 | 2 K.RRFDG EK chr1@6995   | 1.74E-10 | 0.005352 |
| 19July2011 | 7691  | 773.42  | 20.94045 | 2 K.ENDEKW chr3@9851     | 3.35E-10 | 0.006764 |
| 19July2011 | 2221  | 519.6   | -24.1659 | 3 R.NM+15.9 chr5@1190    | 3.91E-10 | 0.009989 |
| 16Mar2011  | 686   | 576.32  | 10.99194 | 2 R.KNWNFV chr5@2065     | 6.30E-11 | 0.002518 |
| 16Mar2011  | 8657  | 761.38  | 23.31246 | 1 R.TTPDNGF Splice@chr   | 3.99E-10 | 0.008618 |
| 17Dec2011  | 1658  | 591.35  | -26.3636 | 2 _KHQQRKI chr2@3755     | 2.25E-10 | 0.006596 |
| 17Dec2011  | 4367  | 660.35  | 4.628511 | 1 K.GGGGV M chr1@1415    | 1.58E-11 | 0.007813 |
| 16Mar2011  | 15711 | 1183.58 | -21.367  | 2 K.ESAYHVT chr4@1025    | 6.45E-12 | 3.19E-04 |
| 16Mar2011  | 7524  | 907.47  | -27.9905 | 2 R.NFDGNIA chr5@1590    | 1.97E-10 | 0.00557  |
| 19July2011 | 5714  | 517.28  | -5.0066  | 3 R.AQNFTRI chr4@1004    | 1.90E-10 | 0.005685 |
| 16Mar2011  | 18473 | 870.02  | -21.4212 | 4 K.PKPNPKP chr4@2405    | 7.49E-11 | 0.002219 |
| 16Mar2011  | 23042 | 910.51  | -9.94054 | 1 K.IPTGATPI chr4@3280   | 1.89E-10 | 0.005463 |
| 16Mar2011  | 5040  | 1107.57 | 7.060205 | 1 R.M+15.99 Splice@chr   | 3.38E-10 | 0.009325 |
| 16Mar2011  | 18673 | 780.09  | 16.19102 | 3 K.IM+15.95 chr2@5715   | 1.82E-10 | 0.004269 |
| 16Mar2011  | 17980 | 780.09  | 16.19102 | 3 K.IM+15.95 chr2@5715   | 3.50E-10 | 0.009793 |
| 16Mar2011  | 18023 | 780.09  | 16.19102 | 3 K.IM+15.95 chr2@5715   | 4.69E-11 | 0.001415 |
| 19July2011 | 12017 | 580.33  | 15.8378  | 4 K.RYSSH SKI chr1@2588  | 1.32E-10 | 0.004696 |
| 19July2011 | 5979  | 871.77  | -24.0183 | 3 K.HRPGFGS Splice@chr   | 1.90E-10 | 0.004331 |
| 16Mar2011  | 1565  | 558.29  | -18.7978 | 2 R.QKIYYGN chr2@1421    | 8.24E-11 | 0.002194 |
| 16Mar2011  | 10059 | 695.86  | 8.220498 | 2 R.K+14.016 chr4@1017   | 2.05E-10 | 0.007274 |
| 16Mar2011  | 10514 | 695.87  | 22.63663 | 2 R.K+14.016 chr4@1017   | 3.08E-10 | 0.009074 |
| 16Mar2011  | 14701 | 743.43  | 23.51286 | 1 K.LMPPSAK chr5@1621    | 1.77E-10 | 0.004269 |
| 19July2011 | 1210  | 587.39  | 24.77348 | 2 R.ISGK+14. chrX@3990   | 2.95E-10 | 0.007229 |
| 19July2011 | 7917  | 634.02  | 0        | 3 K.TIDFSRK+ chr4@6082   | 2.09E-11 | 2.74E-04 |
| 16Mar2011  | 6062  | 500.78  | 27.23483 | 2 K.EKG GPCF chr2@5275   | 3.43E-10 | 0.007848 |
| 16Mar2011  | 20961 | 1127.58 | -26.3134 | 2 K.K+14.016 chr5@4010   | 4.49E-10 | 0.008794 |
| 16Mar2011  | 15667 | 1051.21 | 23.89517 | 3 R.VTPLCKN chr4@1617    | 4.41E-10 | 0.008614 |
| 16Mar2011  | 2429  | 520.32  | -11.7983 | 3 R.RGSVLVV chr2@1205    | 3.06E-10 | 0.008245 |
| 16Mar2011  | 17086 | 811.09  | -23.6916 | 3 K.KNNWK+ chr1@1211     | 2.43E-10 | 0.005751 |
| 16Mar2011  | 10115 | 832.45  | -28.5552 | 2 I.TH SFKNFS Splice@chr | 2.45E-10 | 0.005517 |
| 16Mar2011  | 4857  | 416.23  | -16.2596 | 2 R.ELSVASPI chr2@1378   | 1.29E-10 | 0.002745 |
| 16Mar2011  | 573   | 530.28  | -2.30638 | 2 K.KNALGSE chrX@2520    | 2.16E-10 | 0.007522 |
| 16Mar2011  | 532   | 530.28  | -2.30638 | 2 K.KNALGSE chrX@2520    | 1.12E-10 | 0.003507 |
| 16Mar2011  | 22397 | 668.37  | 13.35295 | 3 R.FVILNNIT chr3@1347   | 2.12E-10 | 0.007453 |
| 16Mar2011  | 18934 | 668.37  | 13.35295 | 3 R.FVILNNIT chr3@1347   | 3.61E-10 | 0.008072 |
| 16Mar2011  | 16940 | 1071.1  | 18.29036 | 2 K.LM+15.95 chr2@6586   | 8.65E-11 | 0.002727 |
| 16Mar2011  | 19304 | 1070.59 | 10.49998 | 2 K.LM+15.95 chr2@6586   | 2.96E-11 | 9.89E-04 |
| 16Mar2011  | 5523  | 705.86  | -3.4637  | 2 K.FQIFHDF chr2@1207    | 2.65E-10 | 0.005619 |
| 16Mar2011  | 16601 | 872.95  | -12.4306 | 2 D.FAEKCQK chr4@4376    | 3.36E-10 | 0.007485 |
| 16Mar2011  | 109   | 403.2   | -16.617  | 2 _ETGDKQK chr5@6655     | 4.55E-10 | 0.00955  |
| 16Mar2011  | 8344  | 679.34  | -13.7301 | 2 R.LLMFTFV Splice@chr   | 1.80E-11 | 1.57E-04 |
| 16Mar2011  | 17804 | 645.32  | -24.3448 | 2 M.RMVEN1 chr4@2988     | 3.10E-10 | 0.006029 |
| 16Mar2011  | 17762 | 645.32  | -24.3448 | 2 M.RMVEN1 chr4@2988     | 1.07E-10 | 0.002171 |

|            |       |         |          |                         |          |          |
|------------|-------|---------|----------|-------------------------|----------|----------|
| 16Mar2011  | 17491 | 645.32  | -24.3448 | 2 M.RMVEN1 chr4@2988    | 1.99E-10 | 0.005602 |
| 16Mar2011  | 17079 | 645.32  | -24.3448 | 2 M.RMVEN1 chr4@2988    | 2.39E-10 | 0.006009 |
| 16Mar2011  | 17405 | 645.32  | -24.3448 | 2 M.RMVEN1 chr4@2988    | 2.22E-10 | 0.006418 |
| 19July2011 | 11850 | 755.73  | -8.27845 | 3 R.WVGENV chr4@9924    | 3.03E-10 | 0.00771  |
| 19July2011 | 4835  | 481     | 7.348424 | 4 R.RRGSMC chrX@9772    | 2.62E-10 | 0.007097 |
| 19July2011 | 16150 | 699.55  | -26.2817 | 5 K.AK+14.01 Splice@chr | 4.05E-11 | 0.001714 |
| 17Dec2011  | 2841  | 578.36  | 22.16904 | 2 R.KVLVHKC Splice@chr  | 1.06E-10 | 0.006645 |
| 19July2011 | 9290  | 860.76  | -27.8142 | 3 _NLSARVC Splice@chr   | 3.79E-10 | 0.009049 |
| 16Mar2011  | 19359 | 1042.62 | -23.6726 | 1 K.MIKK+14 Splice@chr  | 9.32E-11 | 0.003076 |
| 16Mar2011  | 19487 | 991.52  | -10.4753 | 2 _GKERFIST Splice@chr  | 4.29E-10 | 0.008961 |
| 16Mar2011  | 14526 | 779.37  | -25.0137 | 2 K.FGKCLKP chr1@8668   | 8.94E-11 | 0.003047 |
| 16Mar2011  | 13493 | 779.37  | -25.0137 | 2 K.FGKCLKP chr1@8668   | 2.68E-10 | 0.00645  |
| 16Mar2011  | 19388 | 963.53  | -6.50193 | 2 _M+15.99 chr2@6790    | 1.24E-10 | 0.003874 |
| 16Mar2011  | 773   | 422.27  | 2.173301 | 2 K.IGKGEVLI chrX@1204  | 2.94E-10 | 0.005951 |
| 16Mar2011  | 1216  | 422.27  | 2.173301 | 2 K.IGKGEVLI chrX@1204  | 2.04E-10 | 0.004465 |
| 16Mar2011  | 1360  | 422.27  | 2.173301 | 2 K.IGKGEVLI chrX@1204  | 8.01E-10 | 0.008369 |
| 16Mar2011  | 1308  | 422.27  | 2.173301 | 2 K.IGKGEVLI chrX@1204  | 5.74E-10 | 0.006742 |
| 16Mar2011  | 1467  | 422.27  | 2.173301 | 2 K.IGKGEVLI chrX@1204  | 3.22E-10 | 0.007936 |
| 16Mar2011  | 1169  | 422.27  | 2.173301 | 2 K.IGKGEVLI chrX@1204  | 2.02E-10 | 0.004257 |
| 16Mar2011  | 1246  | 422.27  | 2.173301 | 2 K.IGKGEVLI chrX@1204  | 2.06E-10 | 0.004515 |
| 16Mar2011  | 1249  | 422.27  | 2.173301 | 2 K.IGKGEVLI chrX@1204  | 1.05E-10 | 0.001904 |
| 16Mar2011  | 1380  | 422.27  | 2.173301 | 2 K.IGKGEVLI chrX@1204  | 2.05E-10 | 0.004216 |
| 19July2011 | 13601 | 642.82  | -23.3936 | 2 I.SSILTSM+ chr4@1391  | 1.49E-10 | 0.003021 |
| 19July2011 | 10994 | 642.82  | -23.3936 | 2 I.SSILTSM+ chr4@1391  | 4.52E-10 | 0.009327 |
| 16Mar2011  | 1226  | 1105.55 | 22.87747 | 1 K.FMICYIM chr5@9932   | 2.63E-10 | 0.005816 |
| 16Mar2011  | 12829 | 702.98  | 26.58388 | 2 _FKFPRIK+ chr1@1071   | 4.60E-10 | 0.009657 |
| 19July2011 | 5752  | 576.35  | 23.60174 | 3 K.QIFFADA chr5@2058   | 2.07E-10 | 0.003647 |
| 16Mar2011  | 3731  | 401.54  | -1.72703 | 3 R.VGVCLDC chr4@1718   | 2.74E-10 | 0.006461 |
| 16Mar2011  | 673   | 417.25  | 16.29883 | 2 R.RSTAGGk chrX@4592   | 2.72E-10 | 0.006354 |
| 16Mar2011  | 19572 | 861.01  | 5.038961 | 2 K.QLLKIEIEI chr5@7587 | 2.94E-10 | 0.007294 |
| 16Mar2011  | 21253 | 861.52  | 14.72779 | 2 K.QLLKIEIEI chr5@7587 | 8.96E-12 | 1.49E-04 |
| 19July2011 | 8580  | 832.44  | -3.28542 | 4 _K+14.016 chr5@2059   | 1.11E-10 | 0.003914 |
| 16Mar2011  | 17727 | 625.32  | -20.2367 | 2 K.NEKKSMI chr5@7190   | 1.51E-10 | 0.004601 |
| 19July2011 | 4952  | 631.36  | -0.99994 | 3 R.LNGSIYQ chr3@8353   | 7.90E-11 | 0.003297 |
| 16Mar2011  | 20315 | 856.92  | -25.6491 | 2 R.GDTRKG/ chr1@1465   | 3.29E-10 | 0.007936 |
| 17Dec2011  | 1982  | 666.66  | -18.4604 | 3 _RCTFTRV Splice@chr   | 2.15E-11 | 0.004908 |
| 19July2011 | 11688 | 766.35  | -1.71432 | 2 R.PYCPYWF chr4@7273   | 1.55E-10 | 0.005304 |
| 19July2011 | 12771 | 766.35  | -1.71432 | 2 R.PYCPYWF chr4@7273   | 1.14E-10 | 0.003048 |
| 16Mar2011  | 11834 | 992     | -13.488  | 2 K.TWNSETI chr1@1183   | 2.90E-10 | 0.008816 |
| 16Mar2011  | 16542 | 703.38  | 3.04146  | 2 _DQK+14.1 chrX@1252   | 1.70E-10 | 0.005177 |
| 17Dec2011  | 4961  | 446.74  | -6.50424 | 2 K.FEIGGLEk chr4@2153  | 1.74E-10 | 0.00534  |
| 16Mar2011  | 19233 | 818.91  | -18.0587 | 2 _GK+14.01 Splice@chr  | 1.49E-10 | 0.002979 |
| 19July2011 | 10227 | 551.33  | -17.6134 | 4 R.KLLGHGL Splice@chr  | 1.47E-10 | 0.004801 |
| 16Mar2011  | 13392 | 655.33  | -29.3823 | 2 R.M+15.99 Splice@chr  | 3.91E-10 | 0.009271 |
| 16Mar2011  | 5993  | 684.86  | -22.491  | 2 K.FFEFPLRF Splice@chr | 1.44E-10 | 0.003378 |
| 16Mar2011  | 8417  | 439.24  | 6.738486 | 3 R.LNFCLPYI chr1@6004  | 4.52E-10 | 0.009785 |
| 19July2011 | 9546  | 1003.19 | -19.3926 | 3 R.LQSTMT\ chrX@2487   | 3.18E-10 | 0.006766 |

|            |       |         |          |                         |          |          |
|------------|-------|---------|----------|-------------------------|----------|----------|
| 16Mar2011  | 2781  | 616.84  | -11.9922 | 2 R.RSSRMQI Splice@chr  | 3.48E-10 | 0.00696  |
| 16Mar2011  | 19579 | 1074.57 | -22.1531 | 2 K.NYHK+14 chrX@432    | 1.76E-10 | 0.004236 |
| 16Mar2011  | 1813  | 472.29  | 3.561503 | 2 K.QGGKGQ chr5@156     | 1.66E-10 | 0.004174 |
| 16Mar2011  | 1521  | 472.29  | 3.561503 | 2 K.QGGKGQ chr5@156     | 7.09E-11 | 0.001535 |
| 16Mar2011  | 575   | 472.29  | 3.561503 | 2 K.QGGKGQ chr5@156     | 8.56E-11 | 0.00272  |
| 16Mar2011  | 16944 | 1108.92 | -12.2666 | 3 F.PETHVLA chr5@649    | 1.16E-10 | 0.001904 |
| 19July2011 | 7935  | 803.91  | -0.22805 | 2 F.M+15.99 Splice@chr  | 6.45E-11 | 0.003178 |
| 16Mar2011  | 11587 | 511.92  | -28.511  | 3 K.K+14.016 chrX@302   | 3.19E-10 | 0.009018 |
| 19July2011 | 11051 | 840.1   | -11.1533 | 3 R.KMNEK+ chr4@131     | 3.04E-10 | 0.006205 |
| 19July2011 | 11605 | 807.39  | -5.95425 | 3 _CSTM+15 Splice@chr   | 3.27E-10 | 0.006361 |
| 16Mar2011  | 13380 | 651.01  | -6.13476 | 3 R.QHTSVK chr3@326     | 3.08E-10 | 0.006468 |
| 16Mar2011  | 5849  | 700.87  | -8.80816 | 2 K.RERAHLF chrX@817    | 2.37E-10 | 0.007009 |
| 16Mar2011  | 8439  | 835.47  | 20.11476 | 2 K.ATEKQNF Splice@chr  | 5.73E-10 | 0.006742 |
| 19July2011 | 345   | 401.23  | -27.3184 | 3 R.RRSLGGR chrX@217    | 4.00E-11 | 0.002558 |
| 19July2011 | 400   | 401.23  | -27.3184 | 3 R.RRSLGGR chrX@217    | 3.42E-10 | 0.006667 |
| 19July2011 | 401   | 401.23  | -27.3184 | 3 R.RRSLGGR chrX@217    | 4.70E-10 | 0.009809 |
| 17Dec2011  | 5787  | 1268.68 | -8.23797 | 1 _PNDPRN chr5@969      | 4.84E-11 | 0.008333 |
| 19July2011 | 5279  | 652.36  | 17.5333  | 3 K.M+15.99 chr2@742    | 7.05E-11 | 0.001983 |
| 19July2011 | 6995  | 1006.52 | -19.8487 | 2 _QKDFVFL chr4@165     | 4.63E-10 | 0.008065 |
| 17Dec2011  | 4831  | 588.35  | 13.36683 | 2 _IEGLSAR chr4@104     | 2.39E-10 | 0.007853 |
| 16Mar2011  | 16399 | 843.42  | -20.1415 | 2 K.SRKRECG Splice@chr  | 3.69E-10 | 0.004968 |
| 19July2011 | 12010 | 699.94  | 12.01767 | 2 R.KTLK+14. chr4@122   | 1.80E-10 | 0.004412 |
| 16Mar2011  | 1451  | 445.73  | 4.254561 | 2 R.NYVQPN gi 392890    | 2.30E-10 | 0.007533 |
| 16Mar2011  | 1390  | 488.25  | -1.87873 | 2 R.INSEGP Splice@chr   | 1.36E-10 | 0.004333 |
| 19July2011 | 3315  | 644.85  | 13.36674 | 2 _QGSEK+1 chrX@468     | 1.94E-11 | 7.98E-04 |
| 17Dec2011  | 5897  | 1314.74 | -24.2512 | 1 K.K+14.016 chrX@350   | 1.20E-10 | 0.009975 |
| 16Mar2011  | 2180  | 475.56  | -18.7776 | 3 R.NLYGND chrX@167     | 3.45E-10 | 0.007848 |
| 16Mar2011  | 15102 | 628.36  | 13.52351 | 2 R.SPLLWIH Splice@chr  | 2.31E-10 | 0.005947 |
| 16Mar2011  | 15890 | 1089.18 | -19.7299 | 3 Q.LMLLQY chr1@105     | 9.58E-11 | 0.002319 |
| 19July2011 | 12744 | 941.79  | -12.1102 | 3 K.CSTSFYV chr4@715    | 3.60E-10 | 0.009322 |
| 19July2011 | 1057  | 584.34  | 3.719484 | 2 K.SRPQPNT chr1@557    | 3.62E-10 | 0.007937 |
| 16Mar2011  | 18445 | 612.84  | 9.736237 | 2 R.REVAISF chrX@823    | 5.78E-11 | 0.001126 |
| 16Mar2011  | 21499 | 960.47  | -27.0988 | 2 K.DQRSLTR Splice@chr  | 3.03E-10 | 0.007492 |
| 16Mar2011  | 7883  | 872.51  | 7.504842 | 1 K.ISAPNKN chr2@875    | 2.38E-10 | 0.005515 |
| 16Mar2011  | 14791 | 929.5   | 2.270272 | 2 K.LK+14.01 Splice@chr | 3.12E-10 | 0.007081 |
| 16Mar2011  | 5613  | 493.78  | -0.06193 | 2 _VEIQEIQ chr5@199     | 5.01E-10 | 0.009182 |
| 16Mar2011  | 5433  | 493.78  | -0.06193 | 2 _VEIQEIQ chr5@199     | 3.88E-10 | 0.009664 |
| 16Mar2011  | 2449  | 545.3   | -26.5421 | 2 K.RTSTQGL chr3@113    | 1.61E-10 | 0.00566  |
| 16Mar2011  | 8668  | 781.88  | -29.445  | 2 R.CLDYKLQ chr5@188    | 3.71E-10 | 0.00756  |
| 19July2011 | 4263  | 505.87  | -14.7781 | 5 K.LVEKNHK chr3@439    | 3.22E-10 | 0.009899 |
| 16Mar2011  | 8072  | 561.3   | -16.0131 | 2 R.MRASTSL Splice@chr  | 3.20E-10 | 0.006219 |
| 19July2011 | 9584  | 793.73  | -9.75253 | 3 R.SLSVVPG Splice@chr  | 3.78E-10 | 0.007128 |
| 19July2011 | 5513  | 629.06  | -9.03781 | 4 _RIQSK+1 Splice@chr   | 2.87E-10 | 0.007169 |
| 17Dec2011  | 4101  | 911.57  | -12.8512 | 3 K.QKKK+14 chr5@184    | 3.57E-12 | 0.00114  |
| 16Mar2011  | 611   | 437.76  | 4.969236 | 2 K.KLEDGLA chrX@791    | 3.92E-10 | 0.009421 |
| 16Mar2011  | 683   | 437.26  | 8.81428  | 2 K.KLEDGLA chrX@791    | 8.32E-11 | 0.002146 |
| 16Mar2011  | 5265  | 453.24  | 15.08397 | 3 K.ILSENGG chr1@652    | 1.44E-10 | 0.003345 |

|            |       |         |          |                         |          |          |
|------------|-------|---------|----------|-------------------------|----------|----------|
| 16Mar2011  | 12605 | 648.86  | -15.0736 | 2 K.ENFPIPK chr1@1378   | 4.29E-10 | 0.00947  |
| 16Mar2011  | 6702  | 470.24  | 2.601497 | 3 K.FMKRNS' Splice@chr  | 2.89E-10 | 0.008816 |
| 19July2011 | 9074  | 721.37  | -24.3165 | 2 K.KNFFVFI chr5@3211   | 2.94E-10 | 0.005865 |
| 16Mar2011  | 9387  | 718.36  | -11.9967 | 2 F.EILAENM Splice@chr  | 6.42E-10 | 0.007308 |
| 19July2011 | 3483  | 706.32  | -16.2353 | 2 R.CICIWMC Splice@chr  | 1.16E-10 | 0.00317  |
| 16Mar2011  | 15969 | 837.41  | -7.79155 | 4 K.MTIMTGI chrX@3817   | 8.96E-11 | 0.003428 |
| 19July2011 | 1140  | 410.91  | -11.4157 | 3 K.RLASASA chrX@1581   | 5.12E-11 | 0.001436 |
| 16Mar2011  | 17934 | 922.96  | -21.7576 | 2 _RRPNPLG chrX@2169    | 4.52E-10 | 0.009285 |
| 16Mar2011  | 7109  | 506.77  | -0.18102 | 2 K.KMQFMS chr3@3015    | 4.05E-10 | 0.008661 |
| 19July2011 | 5352  | 546.62  | -4.32545 | 3 R.SK+14.01 chr4@3454  | 1.30E-10 | 0.002689 |
| 19July2011 | 8747  | 1002.53 | -8.85688 | 3 R.TLMHQA chr4@1354    | 3.28E-10 | 0.008047 |
| 19July2011 | 13217 | 904.98  | 21.87658 | 2 K.KICFLELN chr2@1325  | 3.79E-10 | 0.007978 |
| 19July2011 | 2085  | 474.75  | -24.5427 | 2 R.LVDTFPTI chr1@1174  | 1.13E-10 | 0.002613 |
| 16Mar2011  | 21838 | 974.17  | 11.23131 | 3 K.RWFCYC( chr5@1566   | 3.13E-10 | 0.007042 |
| 19July2011 | 1283  | 402.22  | 9.736215 | 3 R.PSTK+14. chr4@4842  | 3.51E-10 | 0.00852  |
| 16Mar2011  | 4463  | 501.31  | -7.77082 | 3 K.K+14.016 chrX@1207  | 1.02E-10 | 0.003249 |
| 19July2011 | 178   | 539.27  | 15.15431 | 2 R.KNQEEW chr1@1913    | 2.67E-10 | 0.006228 |
| 16Mar2011  | 916   | 974.53  | -18.1978 | 1 R.AAWASR chr5@1679    | 5.64E-11 | 0.001826 |
| 16Mar2011  | 5926  | 535.32  | 14.2894  | 3 _PYLPIIEVI chr2@9078  | 2.44E-10 | 0.006257 |
| 19July2011 | 4483  | 724.83  | -10.4196 | 2 R.VQSKYTE chr5@2048   | 1.00E-10 | 0.003613 |
| 19July2011 | 7514  | 664.7   | -13.1812 | 3 R.LSLHGLIY chr4@1503  | 2.57E-10 | 0.007031 |
| 19July2011 | 8801  | 719.38  | -25.998  | 2 R.AYLLQSS\ chr1@1369  | 3.51E-10 | 0.006667 |
| 16Mar2011  | 15028 | 783.38  | -13.7766 | 2 K.FFFFFEKF Splice@chr | 1.40E-10 | 0.003535 |
| 16Mar2011  | 16338 | 783.38  | -13.7766 | 2 K.FFFFFEKF Splice@chr | 3.25E-10 | 0.009018 |
| 16Mar2011  | 14232 | 783.39  | -0.9744  | 2 K.FFFFFEKF Splice@chr | 1.85E-10 | 0.004787 |
| 16Mar2011  | 14397 | 782.88  | -11.6312 | 2 K.FFFFFEKF Splice@chr | 2.49E-10 | 0.007168 |
| 16Mar2011  | 5951  | 463.76  | 10.16944 | 2 R.TVFQTTT Splice@chr  | 9.34E-11 | 0.003611 |
| 17Dec2011  | 3460  | 1275.7  | 19.79303 | 1 K.PKNVCK+ chr4@8153   | 5.80E-11 | 0        |
| 16Mar2011  | 283   | 429.3   | 6.039271 | 3 _KKK+14.0 chr3@4199   | 4.34E-10 | 0.008794 |
| 16Mar2011  | 14162 | 882.45  | -7.7239  | 2 K.QLTICQL\ chr4@1373  | 3.84E-10 | 0.00986  |
| 16Mar2011  | 17991 | 983.53  | 3.540903 | 2 R.FFRK+14. chr1@3507  | 6.92E-11 | 0.00158  |
| 16Mar2011  | 1278  | 546.29  | 13.61456 | 2 R.ARGNTM chrX@1572    | 2.51E-10 | 0.006631 |
| 16Mar2011  | 6993  | 750.38  | -9.41207 | 2 K.FWERVERI chr3@9246  | 2.86E-10 | 0.006269 |
| 16Mar2011  | 9806  | 893.53  | -10.9806 | 2 R.IWRLLLL\ Splice@chr | 2.47E-10 | 0.005751 |
| 16Mar2011  | 18685 | 964.98  | -18.2348 | 2 _RFAEFAG chr2@1518    | 6.01E-11 | 0.001997 |
| 16Mar2011  | 16777 | 956.77  | -15.1346 | 4 R.SCRWNP' Splice@chr  | 2.44E-10 | 0.005517 |
| 16Mar2011  | 2800  | 1140.51 | -1.28551 | 1 K.YSEDVW\ chr3@3630   | 8.24E-11 | 0.002761 |
| 19July2011 | 10969 | 895.8   | 21.67791 | 3 _YRNPRGS Splice@chr   | 2.60E-10 | 0.005145 |
| 16Mar2011  | 8609  | 749.36  | 7.748204 | 1 R.SGSAGSC chrX@1158   | 2.29E-10 | 0.006089 |
| 19July2011 | 1700  | 537.94  | 24.8573  | 3 R.WWDPGI Splice@chr   | 1.27E-10 | 0.002867 |
| 16Mar2011  | 10548 | 1107.58 | 22.83551 | 2 W.PSEAGN chr3@2661    | 9.26E-11 | 0.002194 |
| 19July2011 | 7405  | 684.73  | 23.92465 | 3 K.PTCKIQK\ chr3@8019  | 1.97E-10 | 0.004727 |
| 19July2011 | 11817 | 672.38  | 19.09169 | 2 R.VLWTLW chr4@9794    | 2.89E-10 | 0.007085 |
| 16Mar2011  | 11808 | 1179.65 | -27.0001 | 1 R.VKYSVK+ chr5@7993   | 2.29E-10 | 0.007636 |
| 16Mar2011  | 11695 | 1179.65 | -27.0001 | 1 R.VKYSVK+ chr5@7993   | 2.65E-10 | 0.008051 |
| 19July2011 | 10622 | 676.33  | -8.19432 | 3 _YATAQSA chr2@1503    | 1.97E-10 | 0.003225 |
| 16Mar2011  | 8431  | 728.36  | -8.36624 | 3 K.KNDHTFI chr4@6831   | 1.32E-10 | 0.002213 |

|            |       |         |          |                         |          |          |
|------------|-------|---------|----------|-------------------------|----------|----------|
| 16Mar2011  | 11011 | 673.84  | -20.8637 | 2 K.NKEMVG chrX@1159    | 2.43E-10 | 0.006349 |
| 19July2011 | 10739 | 910.81  | -6.77736 | 3 R.CQTTNYK chr5@2009   | 4.05E-10 | 0.009994 |
| 19July2011 | 1048  | 508.28  | 1.082884 | 2 _VLALFCHI chr5@6359   | 2.36E-10 | 0.005116 |
| 19July2011 | 6055  | 837.96  | -1.02096 | 2 K.LK+14.01 chr2@1006  | 1.98E-10 | 0.005322 |
| 19July2011 | 11177 | 545.63  | -6.12639 | 3 K.MRRMVC chrX@8444    | 3.25E-10 | 0.008047 |
| 16Mar2011  | 2465  | 419.23  | -16.9465 | 2 _AYERGLK chr3@5621    | 3.62E-10 | 0.008825 |
| 16Mar2011  | 4973  | 717.38  | 18.80169 | 2 R.NCSEKISK chr4@9502  | 3.57E-10 | 0.007968 |
| 16Mar2011  | 3213  | 629.81  | -11.6068 | 2 _RGSRHSC Splice@chr   | 4.19E-10 | 0.009112 |
| 19July2011 | 10330 | 847.12  | 16.0938  | 3 _ILSKPSEN chr5@3768   | 4.44E-10 | 0.009    |
| 16Mar2011  | 18929 | 843.95  | -11.7298 | 2 R.GK+14.01 chr3@3980  | 1.00E-10 | 0.003168 |
| 16Mar2011  | 20139 | 953.26  | 21.08789 | 4 _CSSFFFKL chr4@1457   | 2.55E-10 | 0.006631 |
| 16Mar2011  | 3389  | 428.25  | -24.7404 | 2 R.AVVLEPA chr5@1479   | 1.14E-10 | 0.002764 |
| 19July2011 | 352   | 421.22  | -22.9009 | 2 K.ATWIHGI chr3@1311   | 2.33E-10 | 0.004453 |
| 16Mar2011  | 17355 | 861.47  | -12.7802 | 1 R.NIGKAM1 chr1@4761   | 5.31E-11 | 7.18E-04 |
| 16Mar2011  | 13762 | 902.47  | -21.033  | 2 R.ILTEK+14 chr3@1910  | 1.58E-10 | 0.003969 |
| 16Mar2011  | 8410  | 690.43  | 7.790779 | 2 R.FLK+14.0 chr3@1219  | 1.60E-10 | 0.003157 |
| 19July2011 | 1492  | 445.24  | -19.4181 | 3 K.KFKNLGE chr2@2730   | 3.52E-10 | 0.008036 |
| 19July2011 | 1801  | 445.24  | -19.4181 | 3 K.KFKNLGE chr2@2730   | 2.83E-10 | 0.005414 |
| 19July2011 | 1963  | 445.24  | -19.4181 | 3 K.KFKNLGE chr2@2730   | 2.37E-10 | 0.005554 |
| 19July2011 | 1143  | 529.31  | -27.9577 | 2 K.RPKMIRT chr3@1081   | 2.72E-10 | 0.00662  |
| 16Mar2011  | 5052  | 525.26  | -0.58212 | 2 R.NHQALD1 Splice@chr  | 6.58E-11 | 0.001245 |
| 19July2011 | 2573  | 450.23  | 12.568   | 2 _HLLCGGD chrX@1371    | 1.10E-10 | 0.003296 |
| 19July2011 | 8008  | 740.39  | 4.873578 | 3 K.LLSITNVF chr3@5507  | 3.79E-10 | 0.007978 |
| 19July2011 | 14588 | 1001.81 | 9.700862 | 3 K.HDAIQHM Splice@chr  | 2.47E-10 | 0.007232 |
| 16Mar2011  | 1808  | 594.29  | -8.69859 | 2 R.KGNFSSH1 chrX@1428  | 7.84E-11 | 0.001954 |
| 19July2011 | 11712 | 940.01  | -15.7298 | 2 R.CWQK+1 chr4@1251    | 4.97E-10 | 0.009978 |
| 17Dec2011  | 4901  | 542.75  | -7.09782 | 2 K.FYKSHCSI chr5@6847  | 1.60E-10 | 0.002677 |
| 16Mar2011  | 18518 | 931.06  | 14.43782 | 2 K.K+14.016 chr2@1119  | 3.82E-10 | 0.007649 |
| 16Mar2011  | 15339 | 787.4   | -11.1598 | 4 _TIFLNLFP chr2@5381   | 4.06E-10 | 0.009991 |
| 17Dec2011  | 2619  | 599.39  | 29.14816 | 2 K.KRKTDK chr1@9644    | 4.71E-11 | 0        |
| 16Mar2011  | 17142 | 836.2   | 18.87937 | 4 R.SWNTNS1 Splice@chr  | 5.39E-11 | 0.002385 |
| 16Mar2011  | 17859 | 1155.09 | -20.6068 | 2 F.PFQVEVD chr5@1199   | 1.97E-10 | 0.005218 |
| 16Mar2011  | 5067  | 599.35  | -22.4071 | 2 R.ALSWLLC chr2@1277   | 3.96E-10 | 0.008463 |
| 19July2011 | 7784  | 837.47  | 27.43681 | 2 K.PENKPKT chr5@1856   | 4.03E-10 | 0.008666 |
| 19July2011 | 8382  | 689.06  | -19.1391 | 3 R.NIHKM+1 chr5@2061   | 2.16E-10 | 0.004955 |
| 19July2011 | 3650  | 578.31  | 17.26868 | 3 K.FLK+14.0 chr5@7629  | 1.32E-10 | 0.003035 |
| 19July2011 | 6698  | 578.31  | 17.26868 | 3 K.FLK+14.0 chr5@7629  | 1.93E-10 | 0.006221 |
| 19July2011 | 8756  | 505.29  | 20.01131 | 3 K.LFDWTK+ chrX@4449   | 1.12E-10 | 0.00317  |
| 16Mar2011  | 1743  | 529.31  | 13.28621 | 2 K.LPHFVM+1 chr4@6580  | 3.18E-10 | 0.006471 |
| 19July2011 | 10329 | 695.86  | -18.358  | 4 R.GFAALPV chr1@7819   | 4.44E-10 | 0.009579 |
| 16Mar2011  | 17233 | 707.66  | 8.176642 | 3 K.CTCCSFFI chr1@4999  | 2.21E-10 | 0.004713 |
| 16Mar2011  | 12980 | 504.28  | 12.56695 | 2 _EGFLNIW chr2@1336    | 1.80E-10 | 0.003926 |
| 16Mar2011  | 19877 | 1133.62 | -22.6149 | 2 V.IIK+14.01 chr1@6230 | 3.34E-10 | 0.008047 |
| 19July2011 | 8955  | 919.43  | 18.47526 | 2 H.WSWSW Splice@chr    | 3.22E-11 | 3.82E-04 |
| 16Mar2011  | 16733 | 829.43  | 10.06432 | 2 R.FADLPFA chr2@1282   | 4.10E-10 | 0.009731 |
| 16Mar2011  | 15522 | 829.43  | 10.06432 | 2 R.FADLPFA chr2@1282   | 3.67E-10 | 0.007685 |
| 16Mar2011  | 16242 | 829.43  | 10.06432 | 2 R.FADLPFA chr2@1282   | 2.22E-10 | 0.004703 |

|            |       |         |          |                         |          |          |
|------------|-------|---------|----------|-------------------------|----------|----------|
| 16Mar2011  | 19077 | 989     | 20.20148 | 2 R.AQNFYQ\ chrX@6811   | 6.64E-11 | 0.001529 |
| 19July2011 | 12029 | 905.13  | -26.989  | 3 _K+14.016 Splice@chr  | 3.27E-10 | 0.008418 |
| 19July2011 | 9650  | 905.13  | -26.989  | 3 _K+14.016 Splice@chr  | 6.40E-12 | 1.98E-04 |
| 19July2011 | 11226 | 977.15  | -24.5099 | 3 K.SCVLM+1 chr5@1955   | 9.09E-11 | 0.004696 |
| 16Mar2011  | 20722 | 879.68  | 0.851775 | 4 K.EK+14.01 chr1@8477  | 1.81E-10 | 0.006738 |
| 16Mar2011  | 8060  | 665.66  | -24.7131 | 3 _SCMKNS\ chr2@3500    | 2.71E-10 | 0.00645  |
| 16Mar2011  | 1488  | 775.42  | -0.23644 | 1 R.AITDVEK. chr4@1776  | 2.20E-10 | 0.006605 |
| 16Mar2011  | 12314 | 854.93  | 15.08172 | 2 _NHKNNM Splice@chr    | 1.14E-10 | 0.002323 |
| 19July2011 | 5416  | 659.82  | -22.4194 | 2 H.DVLELM\ chr4@1347   | 2.49E-10 | 0.006146 |
| 17Dec2011  | 2209  | 711.45  | 22.05387 | 2 _K+14.016 chr4@3236   | 2.82E-11 | 0        |
| 16Mar2011  | 19038 | 1075.07 | 13.2195  | 2 R.TRWK+14 chr3@3084   | 5.13E-12 | 0        |
| 16Mar2011  | 15956 | 1046.54 | 8.873401 | 2 _YELLEDSY Splice@chr  | 2.70E-10 | 0.008145 |
| 16Mar2011  | 1176  | 452.24  | 0.270527 | 3 K.REVEYLEI chrX@1207  | 4.90E-10 | 0.009553 |
| 19July2011 | 4720  | 639.83  | -22.2611 | 2 K.SRINSAEF Splice@chr | 3.24E-10 | 0.006695 |
| 16Mar2011  | 15944 | 782.93  | -8.97657 | 2 K.CVFLISIE\ chrX@8935 | 1.64E-10 | 0.002979 |
| 16Mar2011  | 20309 | 1062.59 | 11.61403 | 2 R.RQLMRIY chr3@1576   | 7.03E-11 | 0.003055 |
| 16Mar2011  | 20744 | 536.29  | -14.8229 | 3 K.M+15.99 chr1@9366   | 2.88E-10 | 0.007053 |
| 16Mar2011  | 19745 | 940.52  | -18.0359 | 2 R.QCGK+14 chr4@1281   | 2.62E-10 | 0.005958 |
| 16Mar2011  | 8543  | 699.38  | 22.28656 | 2 _KKYDKTA chrX@5474    | 3.19E-10 | 0.007637 |
| 16Mar2011  | 11546 | 835.96  | 1.354454 | 2 _NDHKIIV\ chrX@8535   | 2.66E-10 | 0.00548  |
| 16Mar2011  | 18240 | 855.45  | -25.4294 | 3 _RVKYQK\ Splice@chr   | 8.65E-10 | 0.008614 |
| 16Mar2011  | 22361 | 877.49  | 1.499269 | 2 S.LQRRANI Splice@chr  | 1.15E-10 | 0.001758 |
| 16Mar2011  | 12013 | 876.48  | -20.2872 | 2 K.LEKM+15 chr3@1267   | 3.59E-11 | 5.30E-04 |
| 19July2011 | 11658 | 705.39  | 7.390413 | 4 N.LEGKFSV chrX@1572   | 1.74E-10 | 0.004053 |
| 16Mar2011  | 4087  | 675.34  | 12.94338 | 1 R.GVEGEG\ chr1@1155   | 4.55E-10 | 0.009653 |
| 16Mar2011  | 17019 | 897.94  | -9.36066 | 2 R.KLPEFEIS chr3@1115  | 3.73E-10 | 0.008727 |
| 16Mar2011  | 4764  | 509.27  | 18.57407 | 2 K.PRHGCTF chrX@7758   | 4.00E-10 | 0.009421 |
| 17Dec2011  | 4052  | 892.56  | 28.6625  | 3 K.KLFSQKK\ chr1@2208  | 1.47E-10 | 0.007619 |
| 16Mar2011  | 18949 | 1019.5  | -27.554  | 3 K.YVKFLDE\ chr2@9114  | 2.07E-10 | 0.005577 |
| 16Mar2011  | 11129 | 484.31  | 18.81723 | 2 K.ILIATTHA chr3@2125  | 3.53E-11 | 7.22E-04 |
| 19July2011 | 7250  | 967.48  | -4.27404 | 3 _LK+14.01 chr2@7958   | 2.79E-10 | 0.006649 |
| 17Dec2011  | 3841  | 656.91  | -4.88748 | 2 K.IKTK+14.1 chr1@5777 | 3.58E-11 | 0.005051 |
| 16Mar2011  | 13311 | 882.45  | -21.0499 | 2 R.K+14.016 chr4@2657  | 2.13E-10 | 0.004851 |
| 19July2011 | 11654 | 803.47  | 8.142756 | 3 K.LDIFSAEL chr4@1730  | 2.34E-11 | 0.001968 |
| 19July2011 | 11326 | 735.71  | -20.9152 | 3 K.KLMSSTS Splice@chr  | 2.92E-10 | 0.007032 |
| 19July2011 | 6392  | 594.66  | -18.3438 | 3 K.NSPK+14 chrX@2992   | 2.81E-10 | 0.007326 |
| 19July2011 | 2144  | 508.94  | -2.20304 | 3 K.VVENFLT chrX@1521   | 1.96E-10 | 0.004292 |
| 16Mar2011  | 21619 | 968.49  | -13.7527 | 4 K.LNFM+15 chr5@1341   | 8.36E-11 | 0.0019   |
| 16Mar2011  | 6775  | 570.29  | -20.0487 | 2 R.TLFPVSS\ chrX@1530  | 2.29E-10 | 0.007636 |
| 19July2011 | 9838  | 767.75  | 28.23341 | 3 K.MSQIDEN Splice@chr  | 9.97E-11 | 0.003035 |
| 19July2011 | 5043  | 575.78  | -3.05336 | 4 _SRPGPH\ chr5@1832    | 2.21E-10 | 0.007322 |
| 19July2011 | 11315 | 692.64  | -13.5018 | 4 K.KPFFSQIF chr3@2805  | 2.07E-10 | 0.004955 |
| 16Mar2011  | 11884 | 594.35  | 23.35129 | 2 R.PNKMVP Splice@chr   | 3.81E-10 | 0.008459 |
| 16Mar2011  | 13348 | 454.25  | -15.7105 | 3 R.VLIRING\ Splice@chr | 2.60E-10 | 0.007564 |
| 16Mar2011  | 13753 | 454.25  | -15.7105 | 3 R.VLIRING\ Splice@chr | 3.85E-10 | 0.009038 |
| 19July2011 | 1692  | 606.29  | -24.7046 | 2 S.FKTSLNG\ chr5@8948  | 3.30E-10 | 0.006766 |
| 19July2011 | 12817 | 675.38  | -26.5298 | 3 K.FQNILTL\ chr4@7131  | 1.21E-10 | 0.003142 |

|            |       |         |          |                          |          |          |
|------------|-------|---------|----------|--------------------------|----------|----------|
| 16Mar2011  | 17723 | 764.37  | 19.21781 | 1 R.VQCGCSI chrX@9807    | 2.00E-10 | 0.004569 |
| 19July2011 | 5209  | 702.41  | -0.30325 | 2 K.ACYSIK+1 chrX@8214   | 2.98E-10 | 0.005614 |
| 16Mar2011  | 20107 | 983.54  | -19.1215 | 4 R.KSLKTCK- chr4@1331   | 2.12E-10 | 0.004179 |
| 16Mar2011  | 22119 | 1019.87 | -9.9841  | 3 K.GLTTM+1 chr4@1622    | 1.85E-10 | 0.005055 |
| 16Mar2011  | 13626 | 889.95  | -26.1589 | 2 T.ISGSSTIT chr5@6236   | 3.60E-10 | 0.007891 |
| 16Mar2011  | 19979 | 955.01  | -23.6713 | 2 R.AWRWR chr1@1462      | 4.12E-10 | 0.009758 |
| 16Mar2011  | 12859 | 918.97  | 5.09045  | 2 K.QKK+14.( Splice@chr  | 1.29E-10 | 0.003026 |
| 16Mar2011  | 7742  | 619.3   | -0.49358 | 2 K.QDYMYFI chrX@1204    | 2.47E-10 | 0.006104 |
| 16Mar2011  | 19158 | 858.96  | 27.72746 | 2 K.LNCFNYE chrX@1160    | 9.94E-11 | 0.003076 |
| 16Mar2011  | 11405 | 1064.23 | 12.7298  | 3 K.SENFPNF chr1@1492    | 1.09E-10 | 0.003507 |
| 16Mar2011  | 1141  | 435.27  | 0.070275 | 2 R.KGGRNPI chr4@1738    | 1.91E-10 | 0.00416  |
| 17Dec2011  | 427   | 869.47  | -3.7248  | 1 K.KDPLGDF chr2@2560    | 6.11E-11 | 0.00545  |
| 17Dec2011  | 492   | 869.47  | -3.7248  | 1 K.KDPLGDF chr2@2560    | 1.15E-10 | 0        |
| 19July2011 | 4526  | 578.98  | -24.4064 | 3 R.YIIFEK+1 chrX@1746   | 2.40E-10 | 0.006069 |
| 16Mar2011  | 12327 | 861.45  | 28.80029 | 1 R.VMGNN/ Splice@chr    | 2.93E-10 | 0.006993 |
| 16Mar2011  | 12694 | 861.45  | 28.80029 | 1 R.VMGNN/ Splice@chr    | 2.18E-10 | 0.006284 |
| 16Mar2011  | 7432  | 514.26  | -12.1295 | 2 R.FASSLCS/ Splice@chr  | 2.90E-10 | 0.006089 |
| 16Mar2011  | 3387  | 416.22  | -5.14489 | 2 K.WVNGDL chr5@1698     | 1.23E-10 | 0.002837 |
| 19July2011 | 11547 | 824.12  | -6.62417 | 3 K.DFTRK+1 chr2@1417    | 3.62E-10 | 0.00852  |
| 19July2011 | 710   | 589.32  | -4.20346 | 2 R.ISSTGASE Splice@chr  | 1.10E-10 | 0.003056 |
| 16Mar2011  | 14077 | 1051.06 | -16.369  | 2 K.YRK+14.C chr1@3195   | 4.80E-10 | 0.009316 |
| 16Mar2011  | 15209 | 781.41  | -2.97197 | 2 K.FNFAFAL Splice@chr   | 3.38E-10 | 0.009437 |
| 16Mar2011  | 22975 | 988.58  | 28.27578 | 1 R.RNTGVW chr5@8704     | 1.79E-10 | 0.003949 |
| 17Dec2011  | 2150  | 539.27  | -27.1002 | 2 R.M+15.99 Splice@chr   | 1.23E-10 | 0.008906 |
| 19July2011 | 161   | 769.71  | -23.5907 | 3 K.MFKTNFI chr5@8670    | 2.90E-10 | 0.0068   |
| 19July2011 | 1193  | 559.79  | 12.95735 | 2 R.SWREFHI chr3@1281    | 3.18E-10 | 0.007796 |
| 16Mar2011  | 903   | 547.78  | -20.5392 | 2 R.RYFPDIQI chr1@4246   | 5.08E-10 | 0.009748 |
| 19July2011 | 10492 | 727.35  | 3.279709 | 3 R.NGK+14.( chrX@1214   | 2.42E-10 | 0.004615 |
| 19July2011 | 10477 | 767.75  | 10.50774 | 3 R.ELSFKYN' chr4@2379   | 5.63E-11 | 0.003235 |
| 19July2011 | 14648 | 767.75  | -13.6701 | 3 R.KLSFKYN' chr4@2359   | 3.48E-11 | 0.001158 |
| 16Mar2011  | 22756 | 787.4   | 7.916705 | 2 K.NFPLEAP. chr2@1492   | 3.05E-10 | 0.008737 |
| 16Mar2011  | 20541 | 960.98  | 17.71776 | 2 R.RANDIES chr1@1152    | 2.15E-10 | 0.005258 |
| 19July2011 | 8924  | 1099.58 | -16.4451 | 3 K.KVWKWI chr1@1075     | 2.92E-10 | 0.007524 |
| 19July2011 | 2161  | 611.34  | -25.2002 | 2 K.NLK+14.C Splice@chr  | 3.33E-10 | 0.007953 |
| 19July2011 | 9266  | 756.06  | -25.0955 | 3 K.VFMVDN Splice@chr    | 2.46E-10 | 0.004615 |
| 16Mar2011  | 20669 | 1123.25 | -13.4152 | 3 K.MDNTKIL chr5@9110    | 2.45E-10 | 0.006349 |
| 16Mar2011  | 12148 | 562.79  | -28.8684 | 2 K.LYPVGAP Splice@chr   | 6.65E-11 | 2.29E-04 |
| 16Mar2011  | 19442 | 478.51  | -25.2243 | 4 K.VILSDWK chr4@1742    | 1.02E-10 | 0.002651 |
| 16Mar2011  | 22160 | 478.51  | -25.2243 | 4 K.VILSDWK chr4@1742    | 2.59E-10 | 0.008051 |
| 17Dec2011  | 410   | 750.35  | -4.97232 | 1 K.STPDMAI chr1@5847    | 3.88E-11 | 0.006031 |
| 19July2011 | 10355 | 610.09  | -15.8327 | 4 K.KKIQVILS Splice@chr  | 3.43E-10 | 0.00936  |
| 16Mar2011  | 4215  | 639.32  | 25.7921  | 2 R.KTMMTN Splice@chr    | 3.46E-10 | 0.008407 |
| 16Mar2011  | 3026  | 559.34  | -24.755  | 3 _..RNK+14.( chr5@1804  | 1.74E-10 | 0.003925 |
| 16Mar2011  | 19826 | 760.41  | 20.07656 | 3 _..DIINVFDI Splice@chr | 7.12E-10 | 0.007707 |
| 16Mar2011  | 17853 | 936.01  | -20.758  | 2 R.MINKSNC chr1@6469    | 4.61E-10 | 0.009653 |
| 16Mar2011  | 2658  | 400.56  | -8.7581  | 3 R.PTSQSGN chrX@7702    | 3.30E-10 | 0.007671 |
| 19July2011 | 2815  | 566.27  | -21.7926 | 4 M.HM+15.! chr5@1251    | 9.58E-11 | 0.002498 |

|            |       |         |          |                         |          |          |
|------------|-------|---------|----------|-------------------------|----------|----------|
| 17Dec2011  | 8336  | 1215.66 | -3.36769 | 1 K.K+14.016 chr1@1411  | 5.30E-11 | 0.003858 |
| 16Mar2011  | 254   | 490.28  | -13.8587 | 2 K.KNETLVFI chr4@5699  | 2.48E-10 | 0.005559 |
| 19July2011 | 3425  | 531.32  | 13.46605 | 2 R.RSSSLSR Splice@chr  | 3.78E-10 | 0.007978 |
| 17Dec2011  | 3259  | 769.39  | -17.9723 | 1 R.GAQHVEI chr5@2048   | 2.17E-10 | 0.005979 |
| 17Dec2011  | 3256  | 863.54  | 11.97547 | 1 _VAGIPLHI Splice@chr  | 7.81E-11 | 8.83E-04 |
| 16Mar2011  | 14310 | 782.41  | -26.5566 | 2 R.SNLLSIWI chr2@4139  | 2.31E-10 | 0.005565 |
| 19July2011 | 295   | 532.28  | -5.23016 | 2 N.KTTNASCI chr4@6160  | 3.53E-10 | 0.009432 |
| 19July2011 | 10489 | 700.92  | 8.633273 | 2 _VFIVKLHI chrX@1078   | 2.47E-10 | 0.005554 |
| 16Mar2011  | 9260  | 756.39  | 2.666419 | 2 R.PNFFSVE chr5@1039   | 2.60E-10 | 0.005421 |
| 16Mar2011  | 10469 | 598.84  | 24.47447 | 2 K.K+14.016 chr3@7351  | 1.80E-10 | 0.006738 |
| 16Mar2011  | 21219 | 991.05  | 1.820656 | 2 K.NVTILRVI chr5@7467  | 1.37E-10 | 0.003786 |
| 19July2011 | 5637  | 638.33  | 5.458813 | 2 R.RSCSSPN chr5@4647   | 8.89E-11 | 0.003494 |
| 19July2011 | 8255  | 613.33  | -22.2387 | 3 R.REHLNK+ chr4@1607   | 4.05E-10 | 0.00859  |
| 16Mar2011  | 7248  | 771.89  | 0.237527 | 2 R.QHHQK+ Splice@chr   | 7.22E-11 | 0.002219 |
| 16Mar2011  | 16695 | 1134.09 | 2.722417 | 2 G.RQYFPEI chr5@4388   | 3.77E-10 | 0.009481 |
| 16Mar2011  | 11557 | 593.33  | -22.257  | 2 R.LRAFGIFS chr5@1001  | 2.35E-10 | 0.006126 |
| 16Mar2011  | 3763  | 424.73  | -1.36751 | 2 R.WKMASF chr1@4551    | 2.08E-10 | 0.004311 |
| 16Mar2011  | 685   | 415.26  | -2.94675 | 2 _QVVSGLI Splice@chr   | 2.61E-10 | 0.0056   |
| 16Mar2011  | 561   | 415.26  | -2.94675 | 2 _QVVSGLI Splice@chr   | 3.18E-10 | 0.008146 |
| 16Mar2011  | 62    | 403.23  | 12.82261 | 2 K.EDTGKKK chr2@1140   | 3.17E-10 | 0.00767  |
| 16Mar2011  | 15673 | 876.48  | -24.6792 | 2 K.YLTK+14. Splice@chr | 3.09E-11 | 0.001336 |
| 19July2011 | 5783  | 570.32  | -20.3442 | 3 K.SK+14.01 chr4@4827  | 9.79E-11 | 0.00252  |
| 19July2011 | 4301  | 486.27  | 7.043601 | 3 K.LWK+14.0 chr5@2066  | 2.70E-10 | 0.005414 |
| 16Mar2011  | 21445 | 1028.06 | -0.92053 | 2 K.LFCKIKTV chr5@1182  | 2.17E-10 | 0.006181 |
| 16Mar2011  | 13167 | 857.96  | -16.9509 | 2 N.M+15.99 chrX@1774   | 1.78E-10 | 0.004701 |
| 16Mar2011  | 11529 | 478.25  | 3.453079 | 2 R.NLFASFEI Splice@chr | 4.50E-10 | 0.009785 |
| 16Mar2011  | 8465  | 566.31  | 5.026947 | 2 K.NKSKNGC chrX@9734   | 4.71E-10 | 0.00974  |
| 19July2011 | 14263 | 869.41  | -11.8076 | 3 K.K+14.016 Splice@chr | 2.70E-10 | 0.00662  |
| 16Mar2011  | 17163 | 1057.06 | -8.06523 | 2 R.AGHSSRF chrX@1753   | 1.62E-10 | 0.004685 |
| 19July2011 | 674   | 563.31  | 8.291883 | 3 _ISKHAKPI chrX@1527   | 2.10E-10 | 0.005026 |
| 19July2011 | 5087  | 592.62  | 2.994769 | 3 R.MKVTVETI chr2@1081  | 2.96E-10 | 0.008978 |
| 16Mar2011  | 17626 | 1067.55 | -15.9089 | 2 K.VHIFSENI chr1@1356  | 2.45E-10 | 0.00492  |
| 16Mar2011  | 2741  | 407.27  | 15.24918 | 2 R.QAAIVAL Splice@chr  | 1.29E-10 | 0.004501 |
| 19July2011 | 6810  | 537.82  | -9.55065 | 2 K.LIGNNVF chr3@5869   | 1.69E-10 | 0.0033   |
| 19July2011 | 6540  | 537.82  | -9.55065 | 2 K.LIGNNVF chr3@5869   | 3.74E-10 | 0.008193 |
| 19July2011 | 7766  | 545.98  | 14.5598  | 3 R.LIFERSGN Splice@chr | 1.57E-10 | 0.003574 |
| 19July2011 | 12425 | 858.45  | -14.4927 | 2 Y.KMCIIGL1 chr3@9503  | 2.08E-10 | 0.005026 |
| 16Mar2011  | 10225 | 771.88  | 16.70657 | 2 K.QMIRSLS chr2@1379   | 2.80E-10 | 0.006552 |
| 19July2011 | 6763  | 623.35  | -6.03461 | 2 K.ENKISGLI chr3@1031  | 3.20E-10 | 0.008345 |
| 19July2011 | 6874  | 623.35  | -6.03461 | 2 K.ENKISGLI chr3@1031  | 4.30E-10 | 0.008713 |
| 19July2011 | 10075 | 623.35  | -6.03461 | 2 K.ENKISGLI chr3@1031  | 2.20E-10 | 0.006658 |
| 17Dec2011  | 270   | 600.32  | 28.31288 | 2 S.TLGAEVY chr2@7646   | 1.02E-10 | 0.004802 |
| 19July2011 | 11320 | 992.55  | -7.05057 | 2 C.VQEFLIHI Splice@chr | 2.53E-10 | 0.006127 |
| 19July2011 | 6222  | 487.74  | -29.074  | 4 _YM+15.9 Splice@chr   | 1.74E-10 | 0.004446 |
| 16Mar2011  | 7709  | 652.36  | 24.80642 | 2 V.SRDQTLC chr4@1458   | 3.62E-10 | 0.008574 |
| 16Mar2011  | 7845  | 652.36  | 24.80642 | 2 V.SRDQTLC chr4@1458   | 4.23E-10 | 0.009998 |
| 16Mar2011  | 13918 | 898.51  | -13.7369 | 2 K.RK+14.01 chrX@2598  | 2.66E-10 | 0.00706  |

|            |       |         |          |                          |          |          |
|------------|-------|---------|----------|--------------------------|----------|----------|
| 16Mar2011  | 2150  | 748.38  | -29.0724 | 2 _ .QSM+15. Splice@chr  | 1.91E-10 | 0.005365 |
| 16Mar2011  | 17812 | 780.11  | -14.2891 | 3 L.SQK+14.C chrX@3940   | 3.34E-10 | 0.009234 |
| 19July2011 | 2830  | 581.31  | -12.6212 | 2 K.KNDVIFSI chr4@7630   | 1.42E-10 | 0.003021 |
| 16Mar2011  | 22331 | 708.41  | 16.16071 | 1 R.GAAHPVI chr5@6875    | 4.22E-10 | 0.00967  |
| 16Mar2011  | 12678 | 715.16  | -22.3572 | 5 _ .TWISTKPI Splice@chr | 1.22E-10 | 0.003954 |
| 19July2011 | 11892 | 627.37  | -10.3843 | 2 R.KLKKYAFI chr3@2752   | 3.72E-10 | 0.009589 |
| 16Mar2011  | 18098 | 911.57  | 27.52782 | 3 K.VIMPTIVI chr5@9353   | 3.22E-10 | 0.008146 |
| 16Mar2011  | 13123 | 847.94  | -28.3007 | 2 R.LLNCVVC chr1@1450    | 3.35E-10 | 0.007485 |
| 16Mar2011  | 11910 | 736.39  | 0.707424 | 2 G.RGVFEHF chr3@1215    | 2.98E-10 | 0.005942 |
| 16Mar2011  | 17296 | 585.31  | -15.5437 | 4 K.IM+15.95 chr1@5941   | 1.81E-10 | 0.006654 |
| 16Mar2011  | 16176 | 1010.52 | -24.8283 | 3 I.LKSSQKTL chr4@8311   | 3.79E-10 | 0.008341 |
| 16Mar2011  | 15301 | 698.73  | 16.95096 | 3 L.TTLSISLGI chr3@6752  | 3.31E-11 | 0.001153 |
| 19July2011 | 10467 | 787.07  | -19.9624 | 3 _ .RREMRG chr3@1244    | 1.97E-10 | 0.003971 |
| 17Dec2011  | 3990  | 767.49  | -8.04259 | 2 R.TLKAPKTI Splice@chr  | 6.60E-11 | 0.008554 |
| 16Mar2011  | 10826 | 610.01  | 21.11379 | 3 P.TYIKLGN5 chr5@2155   | 2.60E-10 | 0.00781  |
| 19July2011 | 8983  | 494.63  | 2.517327 | 3 R.VLKSSM+ chr4@9927    | 8.34E-11 | 0.003016 |
| 17Dec2011  | 3267  | 1049.66 | 21.69265 | 2 R.TK+14.01 Splice@chr  | 1.29E-10 | 0.001377 |
| 16Mar2011  | 20184 | 514.76  | 5.617247 | 4 K.IHRCGKN chr5@1525    | 2.87E-10 | 0.005695 |
| 16Mar2011  | 486   | 414.9   | 25.73148 | 3 _ .KPEASAA Splice@chr  | 9.29E-10 | 0.009206 |
| 19July2011 | 10094 | 685.85  | -4.72349 | 4 _ .VDRRTGK Splice@chr  | 5.70E-11 | 0.003285 |
| 16Mar2011  | 1393  | 907.49  | 20.3134  | 2 K.MCKK+14 Splice@chr   | 1.46E-10 | 0.004864 |
| 16Mar2011  | 16658 | 848.47  | 26.57649 | 2 _ .IFTWNKN chr2@1275   | 3.92E-10 | 0.007735 |
| 19July2011 | 8919  | 905.47  | -14.6434 | 2 C.TLCFNLRI chrX@2852   | 1.56E-10 | 0.005008 |
| 16Mar2011  | 15778 | 860.93  | -16.9365 | 2 _ .VGNTGVI chr3@1053   | 3.55E-10 | 0.007369 |
| 19July2011 | 7516  | 536.29  | 18.5863  | 2 K.K+14.016 chrX@1630   | 2.60E-10 | 0.006287 |
| 16Mar2011  | 1351  | 566.3   | -6.21191 | 2 _ .ESGNFPK chr4@1045   | 3.04E-10 | 0.007203 |
| 19July2011 | 4240  | 746.38  | -2.04713 | 2 R.RDM+15. chrX@1565    | 1.97E-10 | 0.006201 |
| 19July2011 | 6453  | 726.42  | -3.47772 | 3 K.IIGK+14.C chr2@1205  | 2.91E-10 | 0.008978 |
| 16Mar2011  | 8331  | 501.3   | 27.5413  | 2 K.NLERMPI Splice@chr   | 2.39E-11 | 1.23E-04 |
| 16Mar2011  | 8223  | 501.3   | 27.5413  | 2 K.NLERMPI Splice@chr   | 5.51E-11 | 0.001694 |
| 19July2011 | 5725  | 484.91  | -26.9913 | 3 R.M+15.99 chrX@6741    | 2.11E-12 | 0        |
| 16Mar2011  | 7820  | 759.4   | -0.08048 | 1 K.TAAGGT( chrX@1696    | 9.32E-11 | 0.003289 |
| 16Mar2011  | 7664  | 759.41  | 13.03771 | 1 K.TAAGGT( chrX@1696    | 1.37E-10 | 0.004161 |
| 19July2011 | 1538  | 460.25  | 10.86342 | 3 K.CTK+14.C Splice@chr  | 3.84E-11 | 0.001614 |
| 16Mar2011  | 18885 | 760.41  | -27.8617 | 3 C.VMRKVI chrX@2627     | 2.05E-11 | 2.64E-04 |
| 19July2011 | 6468  | 584.01  | 17.51862 | 3 K.LGERRNE chr3@7085    | 1.99E-10 | 0.004807 |
| 16Mar2011  | 1712  | 646.38  | 8.889996 | 2 R.EEKLM+ chrX@1017     | 3.76E-10 | 0.00991  |
| 16Mar2011  | 12086 | 887.86  | 7.817018 | 2 V.EGMADC Splice@chr    | 2.84E-10 | 0.006    |
| 16Mar2011  | 12525 | 887.86  | 7.817018 | 2 V.EGMADC Splice@chr    | 3.11E-10 | 0.008835 |
| 16Mar2011  | 17267 | 859.95  | -15.9169 | 4 K.PQFTK+1 chr2@1518    | 1.23E-10 | 0.004233 |
| 17Dec2011  | 4384  | 533.22  | -20.1836 | 2 R.SNCNGT/ Splice@chr   | 4.28E-11 | 0        |
| 16Mar2011  | 21566 | 930.49  | -4.9697  | 3 K.KSWILSF5 chr5@5195   | 2.84E-10 | 0.006    |
| 19July2011 | 12625 | 746.13  | -24.819  | 4 R.ITK+14.0 chr4@7837   | 1.95E-10 | 0.004727 |
| 16Mar2011  | 8666  | 469.25  | -17.9558 | 3 K.NYNPVLL chr5@5362    | 2.38E-11 | 4.21E-04 |
| 16Mar2011  | 1429  | 448.24  | 29.27433 | 2 R.EMFKNAI chrX@6725    | 2.14E-10 | 0.006153 |
| 19July2011 | 4693  | 634.82  | 10.20774 | 4 R.RLFGCGR chr1@4327    | 2.74E-10 | 0.007097 |
| 19July2011 | 2223  | 407.71  | 26.61895 | 4 R.GQQFK+ chr1@5044     | 1.15E-10 | 0.003015 |

|            |       |         |          |                         |          |          |
|------------|-------|---------|----------|-------------------------|----------|----------|
| 16Mar2011  | 6686  | 519.75  | -19.3713 | 2 K.LFECINNI Splice@chr | 9.03E-11 | 0.002959 |
| 16Mar2011  | 23290 | 928.54  | -2.43506 | 1 R.RFVGRHF chr5@1290   | 2.18E-10 | 0.006879 |
| 19July2011 | 15040 | 906.82  | -21.7261 | 3 K.VENPPK+ chr5@1967   | 1.22E-10 | 0.004315 |
| 16Mar2011  | 8025  | 599.88  | 20.89339 | 2 _K+14.016 Splice@chr  | 1.40E-10 | 0.003204 |
| 16Mar2011  | 13935 | 615.37  | -21.1605 | 2 D.IQTTRTV' chr3@7330  | 3.77E-10 | 0.008459 |
| 16Mar2011  | 14268 | 615.37  | -21.1605 | 2 D.IQTTRTV' chr3@7330  | 3.78E-10 | 0.009432 |
| 17Dec2011  | 1442  | 1184.58 | 10.47923 | 1 K.KCNYSKN chrX@1241   | 2.99E-11 | 0        |
| 16Mar2011  | 22040 | 1026.83 | 20.30933 | 3 R.RSDREEK Splice@chr  | 2.43E-10 | 0.003625 |
| 19July2011 | 7465  | 772.91  | 11.59298 | 2 Q.FDGKSK\ chr5@8532   | 3.86E-10 | 0.009655 |
| 16Mar2011  | 12574 | 1027.5  | -5.94596 | 1 K.SSFTLSTE chr5@1071  | 2.36E-10 | 0.007272 |
| 19July2011 | 0     | 488.72  | 20.27404 | 2 _NSDNDHI chrX@9214    | 1.83E-10 | 0.00511  |
| 19July2011 | 1255  | 584.34  | -17.9577 | 2 _KTVFSKII chr4@4703   | 2.19E-10 | 0.004634 |
| 19July2011 | 4854  | 405.27  | -25.1626 | 3 K.LLAK+14. chr4@5019  | 3.20E-10 | 0.008418 |
| 16Mar2011  | 5143  | 569.31  | 5.692186 | 2 R.QTLPFQF chr1@9133   | 4.82E-11 | 0.001692 |
| 19July2011 | 175   | 539.79  | 19.78879 | 2 _KAGADM Splice@chr    | 1.71E-10 | 0.004021 |
| 19July2011 | 12589 | 775.63  | -29.3103 | 4 R.NRVGFFF chrX@1443   | 2.47E-10 | 0.00614  |
| 16Mar2011  | 16184 | 575.97  | -15.8522 | 3 K.TSAPEYT' chr4@1117  | 3.37E-10 | 0.008047 |
| 16Mar2011  | 444   | 787.37  | 0.155234 | 2 R.NITNTNT Splice@chr  | 8.17E-16 | 0        |
| 16Mar2011  | 374   | 787.37  | 0.155234 | 2 R.NITNTNT chr2@9772   | 1.05E-14 | 0        |
| 16Mar2011  | 517   | 787.37  | 0.155234 | 2 R.NITNTNT Splice@chr  | 2.19E-16 | 0        |
| 16Mar2011  | 15324 | 965.76  | 6.091444 | 4 R.K+14.016 chr5@2085  | 8.56E-11 | 0.003961 |
| 16Mar2011  | 23051 | 790.4   | 14.24776 | 1 R.VGAENG' chr2@1436   | 6.00E-12 | 1.62E-04 |
| 16Mar2011  | 1127  | 412.69  | 22.31332 | 2 R.EYGGGGI chr5@1960   | 2.43E-10 | 0.005571 |
| 17Dec2011  | 3346  | 899.9   | 17.0433  | 2 R.SSK+14.0 Splice@chr | 3.07E-12 | 0.007353 |
| 19July2011 | 11960 | 553.54  | 20.58474 | 4 K.RETSLSEL Splice@chr | 2.83E-10 | 0.006999 |
| 19July2011 | 4750  | 452.73  | -24.0502 | 2 K.SVDLVDV chr5@8503   | 8.15E-11 | 0.002997 |
| 19July2011 | 5230  | 452.73  | -24.0502 | 2 K.SVDLVDV chr5@8503   | 9.55E-11 | 0.004696 |
| 19July2011 | 353   | 775.4   | -7.96044 | 1 K.RSDGVNI chr5@7315   | 3.99E-10 | 0.00845  |
| 16Mar2011  | 11445 | 578.32  | -2.3259  | 2 R.IPLKNCP\ chr5@2058  | 1.07E-10 | 0.0023   |
| 19July2011 | 12366 | 792.4   | 3.524391 | 3 K.TYCVVVN Splice@chr  | 1.68E-10 | 0.005165 |
| 19July2011 | 6896  | 751.71  | -13.8538 | 3 K.CFTLNLG' chr4@1214  | 5.79E-11 | 0.00222  |
| 16Mar2011  | 9883  | 478.76  | -2.55509 | 4 R.TINKIEAS chr3@1018  | 2.44E-10 | 0.006263 |
| 19July2011 | 222   | 408.56  | -23.8612 | 3 _KGALGFII Splice@chr  | 2.72E-10 | 0.007935 |
| 19July2011 | 232   | 408.56  | -23.8612 | 3 _KGALGFII Splice@chr  | 2.01E-11 | 8.92E-04 |
| 19July2011 | 9679  | 842.97  | 8.524185 | 2 K.TQK+14.( chr2@1089  | 4.57E-10 | 0.00886  |
| 16Mar2011  | 2900  | 751.37  | -5.12445 | 1 K.EAGATFR chr5@5418   | 2.98E-10 | 0.006269 |
| 19July2011 | 918   | 488.25  | 6.45127  | 2 K.DTGAAN' Splice@chr  | 3.46E-12 | 2.27E-04 |
| 16Mar2011  | 21371 | 1074.07 | 15.05287 | 2 R.ESDK+14 chr2@4510   | 5.11E-10 | 0.009902 |
| 16Mar2011  | 6579  | 595.36  | 5.340008 | 2 K.IRDLEKIFI chrX@1740 | 1.70E-10 | 0.004801 |
| 16Mar2011  | 19249 | 1102.07 | 18.5521  | 2 K.LM+15.9' chrX@1473  | 4.72E-10 | 0.009785 |
| 19July2011 | 512   | 455.22  | -4.10061 | 2 R.STNTSPS' chr4@8264  | 2.83E-10 | 0.006999 |
| 16Mar2011  | 16338 | 834.43  | -7.90925 | 3 Q.SVPCAK+ chr4@1497   | 1.92E-10 | 0.005278 |
| 19July2011 | 43    | 571.76  | -22.8842 | 2 R.WDKGEV chr4@1843    | 3.31E-10 | 0.008307 |
| 16Mar2011  | 18809 | 966.46  | 3.984949 | 3 K.YVTENVA chr1@1029   | 1.84E-10 | 0.003823 |
| 16Mar2011  | 1333  | 416.21  | 5.880076 | 2 R.EDGRAG' chr5@4846   | 3.85E-10 | 0.00853  |
| 16Mar2011  | 18862 | 630.72  | -9.69245 | 3 K.NKNGSFF chrX@1724   | 3.17E-10 | 0.008929 |
| 16Mar2011  | 14453 | 631.37  | -7.84281 | 2 R.SKILTFFLI chr1@1496 | 3.46E-10 | 0.007706 |

|            |       |         |          |                          |          |          |
|------------|-------|---------|----------|--------------------------|----------|----------|
| 19July2011 | 2202  | 499.95  | -15.4132 | 3 R.VTVEK+1 chr5@9751    | 1.77E-10 | 0.003035 |
| 16Mar2011  | 19075 | 1034.08 | -11.9095 | 2 R.YELSDRL chr5@2035    | 3.85E-10 | 0.008574 |
| 16Mar2011  | 6482  | 465.29  | -14.592  | 2 K.VVIMIVQ chr4@1060    | 4.25E-10 | 0.009122 |
| 17Dec2011  | 6049  | 727.89  | 14.27484 | 4 R.FFTGLKSI chr3@6041   | 5.27E-11 | 0.004637 |
| 19July2011 | 8640  | 585.01  | -5.88962 | 3 R.ITALFPLC chr1@1065   | 3.40E-10 | 0.008221 |
| 16Mar2011  | 15262 | 920.99  | -19.6801 | 2 R.FFEKK+14 chr3@1115   | 4.16E-10 | 0.008818 |
| 19July2011 | 6575  | 801.43  | -15.831  | 2 K.YHKFTLS chr2@5605    | 4.17E-10 | 0.008986 |
| 19July2011 | 7677  | 571.97  | 28.1329  | 3 _ .NAEK+14 chr4@2055   | 2.30E-10 | 0.007554 |
| 19July2011 | 8978  | 571.97  | 28.1329  | 3 _ .NAEK+14 chr4@2055   | 1.62E-10 | 0.003772 |
| 16Mar2011  | 3552  | 588.37  | -28.9912 | 2 K.M+15.99 Splice@chr   | 1.38E-10 | 0.003859 |
| 19July2011 | 1893  | 855.08  | 2.000988 | 3 K.HFCVSEN chr5@9652    | 3.08E-12 | 1.98E-04 |
| 16Mar2011  | 16684 | 677.35  | -13.3558 | 2 K.THTFLKYI chr3@5090   | 2.69E-10 | 0.008893 |
| 16Mar2011  | 1686  | 564.29  | 6.826492 | 2 K.KSHHCFR chrX@1521    | 4.48E-10 | 0.008723 |
| 19July2011 | 11498 | 664.04  | -26.1428 | 3 K.VVLFNRNI Splice@chr  | 8.64E-11 | 0.003169 |
| 19July2011 | 15010 | 733.03  | -23.8835 | 3 K.ITQK+14. chrX@1258   | 2.70E-10 | 0.00662  |
| 16Mar2011  | 12449 | 758.72  | 27.17358 | 3 K.LANGENF Splice@chr   | 8.29E-11 | 0.002525 |
| 17Dec2011  | 2376  | 766.49  | -5.1827  | 2 Y.SRPIGK+1 chr1@7479   | 1.18E-10 | 0.003472 |
| 16Mar2011  | 8201  | 540.79  | -7.46281 | 2 _ .KNSLNVY chr4@1088   | 2.03E-10 | 0.004615 |
| 19July2011 | 1259  | 618.3   | -23.1364 | 2 K.KNEFCAK chr3@1324    | 3.41E-10 | 0.006695 |
| 17Dec2011  | 2161  | 832.43  | 6.544059 | 1 _ .VPGTNTL Splice@chr  | 6.12E-12 | 0        |
| 17Dec2011  | 3996  | 1199.75 | 10.28514 | 1 R.TSWPK+1 chr5@4601    | 1.70E-11 | 0.008333 |
| 16Mar2011  | 19194 | 728.38  | 8.751644 | 4 K.EFVENYL Splice@chr   | 4.44E-10 | 0.009572 |
| 19July2011 | 8320  | 691.63  | -16.5978 | 4 K.TFFFNSKI chr5@7968   | 1.78E-10 | 0.00511  |
| 16Mar2011  | 15611 | 778.16  | 8.662259 | 4 K.NSSLLLN Splice@chr   | 7.27E-11 | 0.002902 |
| 19July2011 | 14545 | 644.08  | -15.6602 | 4 K.PGYIRISN chr4@1727   | 2.28E-10 | 0.006795 |
| 17Dec2011  | 1556  | 544.35  | -10.2859 | 2 K.AVK+14.( chrX@1254   | 4.51E-11 | 0.004637 |
| 17Dec2011  | 3026  | 544.35  | -10.2859 | 2 K.AVK+14.( chrX@1254   | 2.34E-11 | 0.00545  |
| 16Mar2011  | 2775  | 449.58  | 4.626246 | 3 K.NPKQTISI chr4@8548   | 3.16E-10 | 0.006471 |
| 16Mar2011  | 2090  | 403.23  | 6.004115 | 2 R.RGKGGS5 chr2@5830    | 2.40E-10 | 0.004804 |
| 19July2011 | 6185  | 652.67  | 7.154256 | 3 K.TPKNPIFI chr2@1356   | 4.47E-10 | 0.009715 |
| 19July2011 | 5028  | 597.29  | -1.33067 | 2 K.KFNMGQ chr2@2585     | 6.02E-11 | 0.002572 |
| 16Mar2011  | 10734 | 595.66  | -25.5699 | 3 K.LKLTAKT chr5@9936    | 4.48E-10 | 0.009991 |
| 19July2011 | 749   | 524.29  | 2.099508 | 2 K.WGTLSF chr3@1255     | 1.71E-10 | 0.003035 |
| 16Mar2011  | 1641  | 705.37  | -3.03285 | 2 R.DIRQIKW Splice@chr   | 1.00E-10 | 0.003168 |
| 16Mar2011  | 13017 | 966.04  | 10.79041 | 2 K.SK+14.01 chr3@8965   | 4.08E-10 | 0.009991 |
| 16Mar2011  | 8897  | 455.25  | 8.8683   | 3 K.LEAKGGC chr5@1298    | 2.44E-10 | 0.007106 |
| 16Mar2011  | 15543 | 727.39  | 1.052533 | 2 K.LTEVFVM chr3@1264    | 2.95E-10 | 0.008121 |
| 16Mar2011  | 15313 | 727.39  | 1.052533 | 2 K.LTEVFVM chr3@1264    | 1.09E-10 | 0.001758 |
| 16Mar2011  | 12123 | 711.35  | -20.3635 | 2 V.ENARTLF chr2@8994    | 1.26E-10 | 0.004233 |
| 16Mar2011  | 5457  | 975.56  | -28.558  | 1 R.FIIDINK.I Splice@chr | 1.09E-09 | 0.009929 |
| 19July2011 | 5249  | 486.76  | 26.70151 | 2 R.LSAQSSH chrX@5482    | 2.53E-10 | 0.006287 |
| 19July2011 | 3264  | 545.3   | 17.9422  | 2 R.LSSGSPCI chr5@4587   | 7.87E-11 | 0.003016 |
| 16Mar2011  | 2366  | 665.39  | 23.67594 | 2 R.RRKMGR Splice@chr    | 3.98E-10 | 0.008792 |
| 19July2011 | 4955  | 646.34  | -29.571  | 3 K.HRKHEKS chr4@6452    | 6.59E-11 | 0.004001 |
| 19July2011 | 10222 | 781.08  | 5.662951 | 3 K.FWGFSRH chr5@1798    | 3.76E-11 | 0.001287 |
| 16Mar2011  | 21815 | 991.52  | -7.79771 | 2 K.MCKKCAI chr2@1818    | 1.87E-10 | 0.00591  |
| 16Mar2011  | 5852  | 438.24  | -5.79313 | 2 K.MNALIGT chr1@1125    | 5.23E-10 | 0.009996 |

|            |       |         |          |                         |          |          |
|------------|-------|---------|----------|-------------------------|----------|----------|
| 17Dec2011  | 3733  | 895.89  | 17.03589 | 3 R.TK+14.01 chr1@1640  | 1.06E-10 | 0.00885  |
| 16Mar2011  | 3953  | 680.33  | -9.88309 | 1 K.GGGGGT chr5@1964    | 1.70E-10 | 0.004098 |
| 19July2011 | 10071 | 1172.1  | -3.10143 | 2 K.K+14.016 chr5@1557  | 2.83E-10 | 0.006583 |
| 16Mar2011  | 20641 | 1091.05 | -26.4114 | 2 N.EWPNSE chrX@1375    | 3.20E-10 | 0.007936 |
| 19July2011 | 5782  | 680.68  | -17.6382 | 3 R.LTTFGCR chrX@6430   | 1.06E-10 | 0.00358  |
| 16Mar2011  | 12526 | 565.3   | -5.70712 | 4 P.NILNPKIS chr4@1305  | 3.21E-10 | 0.00734  |
| 16Mar2011  | 7137  | 600.41  | -6.92417 | 2 K.K+14.016 chr3@2975  | 9.70E-11 | 0.001703 |
| 16Mar2011  | 7141  | 600.41  | -6.92417 | 2 K.K+14.016 chr3@2975  | 2.81E-10 | 0.005581 |
| 16Mar2011  | 21331 | 1106.08 | -0.96602 | 2 _ICWTTTRT Splice@chr  | 1.99E-10 | 0.005147 |
| 19July2011 | 8977  | 672.34  | 16.60654 | 2 K.WELEVEL chrX@4091   | 1.96E-10 | 0.006654 |
| 16Mar2011  | 4617  | 599.35  | -1.37646 | 2 K.K+14.016 chr3@1205  | 7.95E-11 | 0.003348 |
| 19July2011 | 6042  | 612.33  | -22.4083 | 3 K.ADNMGE chr5@8975    | 2.17E-10 | 0.005553 |
| 17Dec2011  | 1329  | 817.47  | 10.63111 | 1 K.NDGVVKI chr5@4242   | 1.10E-11 | 0        |
| 16Mar2011  | 18698 | 897.93  | -29.1735 | 2 R.DLEKTKPI chr1@2775  | 8.55E-11 | 0.001797 |
| 17Dec2011  | 6433  | 841.48  | -18.2273 | 2 K.SQPK+14 chr4@3088   | 9.29E-11 | 0.008906 |
| 16Mar2011  | 15516 | 832.44  | -1.72487 | 2 _KYAEINVI chrX@6686   | 1.59E-10 | 0.004679 |
| 16Mar2011  | 16134 | 928.01  | 17.71166 | 2 R.K+14.016 chr5@2010  | 4.24E-10 | 0.008256 |
| 16Mar2011  | 12233 | 1074.52 | -1.1082  | 2 R.CELTFLRC chr5@9654  | 1.99E-10 | 0.004569 |
| 16Mar2011  | 9772  | 749.9   | 9.339594 | 2 K.RK+14.01 chr2@1332  | 8.27E-11 | 0.001691 |
| 16Mar2011  | 357   | 414.22  | -7.48387 | 3 K.VEVSSST chr4@8807   | 2.90E-10 | 0.005828 |
| 16Mar2011  | 371   | 414.22  | -7.48387 | 3 K.VEVSSST chr4@8807   | 3.64E-10 | 0.00802  |
| 16Mar2011  | 377   | 414.22  | -7.48387 | 3 K.VEVSSST chr4@8807   | 4.74E-10 | 0.009979 |
| 16Mar2011  | 364   | 414.22  | -7.48387 | 3 K.VEVSSST chr4@8807   | 2.61E-10 | 0.005619 |
| 16Mar2011  | 360   | 414.22  | -7.48387 | 3 K.VEVSSST chr4@8807   | 2.14E-10 | 0.0052   |
| 16Mar2011  | 21745 | 990.04  | -12.6508 | 2 K.NKKFSEN chr4@5831   | 5.80E-11 | 0.002364 |
| 16Mar2011  | 1149  | 806.39  | 0.530489 | 1 R.DEEKTGK chrX@1565   | 5.13E-10 | 0.006338 |
| 19July2011 | 10606 | 971.52  | 0.661789 | 2 R.ERLFYFNI Splice@chr | 2.85E-10 | 0.007097 |
| 16Mar2011  | 10883 | 412.23  | 25.38111 | 2 R.EGYSVLR chr3@5467   | 3.58E-10 | 0.00806  |
| 16Mar2011  | 18776 | 900.48  | -12.0499 | 2 R.KELSNYIE chrX@8877  | 4.53E-10 | 0.008794 |
| 16Mar2011  | 18868 | 900.48  | -12.0499 | 2 R.KELSNYIE chrX@8877  | 2.63E-11 | 4.94E-04 |
| 19July2011 | 4104  | 574.32  | -18.7109 | 3 K.QAKAQH chrX@1635    | 2.10E-10 | 0.00511  |
| 19July2011 | 4042  | 530.28  | -19.527  | 3 K.PMLSLCK chr4@1354   | 1.80E-10 | 0.004729 |
| 19July2011 | 6067  | 633.01  | 26.33328 | 3 K.TIRMMRI Splice@chr  | 1.55E-10 | 0.003061 |
| 19July2011 | 15920 | 800.07  | -28.8212 | 3 K.NFFFFNF chr2@2430   | 2.65E-11 | 7.86E-04 |
| 17Dec2011  | 4470  | 804.41  | -16.3512 | 1 R.SGPCVRK chr5@6626   | 1.38E-10 | 0.006944 |
| 16Mar2011  | 19885 | 967.51  | 10.46641 | 3 R.TPLKSQG chr5@1560   | 2.60E-10 | 0.006211 |
| 16Mar2011  | 11308 | 725.4   | -0.37794 | 2 R.RSTKQKN Splice@chr  | 2.50E-10 | 0.008884 |
| 16Mar2011  | 6018  | 634.34  | -25.8269 | 2 K.LNFLDLYI chr5@1555  | 3.12E-10 | 0.007042 |
| 16Mar2011  | 2489  | 582.29  | 2.100023 | 2 R.NEIYRDEI chrX@3896  | 2.61E-10 | 0.005421 |
| 16Mar2011  | 2460  | 582.29  | 2.100023 | 2 R.NEIYRDEI chrX@3896  | 1.15E-10 | 0.003176 |
| 19July2011 | 7284  | 473.52  | 7.852541 | 4 R.KWENM chr3@8457     | 4.20E-11 | 5.69E-04 |
| 16Mar2011  | 22410 | 956.02  | -1.66167 | 2 R.KLRYFGG chrX@2075   | 1.80E-10 | 0.003949 |
| 19July2011 | 3523  | 573.3   | -19.1256 | 3 K.EMPFSV Splice@chr   | 2.28E-11 | 7.98E-04 |
| 16Mar2011  | 17617 | 848.97  | 0.791766 | 2 R.LLELAPTC chr2@6685  | 1.53E-14 | 0        |
| 16Mar2011  | 20704 | 921     | -9.12591 | 2 K.K+14.016 chr1@1372  | 1.06E-10 | 0.003884 |
| 16Mar2011  | 20762 | 921     | -9.12591 | 2 K.K+14.016 chr1@1372  | 1.30E-11 | 5.38E-04 |
| 16Mar2011  | 22191 | 920.5   | -7.30166 | 2 K.K+14.016 chr1@1372  | 4.57E-10 | 0.008993 |

|            |       |         |          |                         |          |          |
|------------|-------|---------|----------|-------------------------|----------|----------|
| 16Mar2011  | 21377 | 921     | -9.12591 | 2 K.K+14.016 chr1@137   | 3.85E-10 | 0.009038 |
| 16Mar2011  | 3580  | 409.22  | -18.6349 | 2 R.AGGGTAl chr2@766    | 8.63E-11 | 0.002111 |
| 16Mar2011  | 21101 | 1115.61 | -12.2432 | 2 G.CQK+1 chrX@150      | 9.08E-10 | 0.009016 |
| 16Mar2011  | 251   | 982.51  | -19.8368 | 1 R.RRSPHSS chrX@497    | 2.41E-10 | 0.005992 |
| 19July2011 | 2553  | 472.29  | 18.97339 | 4 Q.INSPLKM chr5@233    | 2.16E-10 | 0.004634 |
| 16Mar2011  | 14990 | 965.76  | -8.14688 | 4 R.FPHFRAS chr1@438    | 3.24E-10 | 0.00999  |
| 16Mar2011  | 14049 | 965.76  | -8.14688 | 4 R.FPHFRAS chr1@438    | 3.70E-10 | 0.007448 |
| 16Mar2011  | 10131 | 837.43  | 9.705332 | 1 R.HSPASPN Splice@chr  | 2.92E-10 | 0.006364 |
| 19July2011 | 4858  | 708.37  | 12.94301 | 2 K.RSLAM+1 chr1@262    | 2.85E-10 | 0.005804 |
| 16Mar2011  | 807   | 416.74  | 15.56249 | 4 R.CPSPLQLI chr1@651   | 2.54E-10 | 0.006405 |
| 19July2011 | 4732  | 620.8   | -15.0667 | 2 C.ISSITHHA chrX@167   | 2.04E-10 | 0.005298 |
| 16Mar2011  | 715   | 589.33  | -21.4392 | 2 K.QNSLLFSI chrX@115   | 1.55E-10 | 0.00507  |
| 16Mar2011  | 1022  | 589.33  | -21.4392 | 2 K.QNSLLFSI chrX@115   | 2.20E-10 | 0.004381 |
| 19July2011 | 8857  | 719.71  | -17.7771 | 3 K.YNPKEKE Splice@chr  | 3.88E-10 | 0.007616 |
| 16Mar2011  | 672   | 449.25  | 12.86781 | 2 _RTAAHW chr5@1071     | 2.59E-10 | 0.007407 |
| 19July2011 | 9741  | 880.46  | -8.12217 | 3 K.FKAVFQK chr4@1481   | 6.10E-11 | 0.003178 |
| 19July2011 | 9986  | 603.34  | 21.38138 | 2 _RSLQCFG Splice@chr   | 1.32E-10 | 0.003035 |
| 16Mar2011  | 19111 | 1161.58 | 9.206705 | 3 K.RK+14.01 chrX@2070  | 3.44E-10 | 0.009336 |
| 16Mar2011  | 21576 | 1070.59 | 5.281973 | 2 R.TRFELVS chr5@890    | 1.29E-10 | 0.00405  |
| 17Dec2011  | 425   | 460.25  | -13.0363 | 2 R.ASAVTNS chrX@935    | 7.34E-11 | 0.005263 |
| 16Mar2011  | 15212 | 772.09  | -26.0518 | 3 K.FSKKKNT chr2@1220   | 4.58E-10 | 0.009545 |
| 16Mar2011  | 1314  | 743.44  | -2.05524 | 1 R.GIAGALN Splice@chr  | 1.89E-10 | 0.003823 |
| 19July2011 | 10389 | 553.65  | -11.602  | 3 R.QLPLTQC Splice@chr  | 5.69E-11 | 0.002572 |
| 16Mar2011  | 21672 | 937.46  | 22.94283 | 3 K.MEK+14. Splice@chr  | 9.30E-11 | 0.002959 |
| 16Mar2011  | 14861 | 728.44  | -19.8012 | 2 K.LDLESLV Splice@chr  | 2.10E-10 | 0.007453 |
| 19July2011 | 1258  | 495.24  | 3.025635 | 2 K.LAENDN Splice@chr   | 1.24E-10 | 0.004696 |
| 19July2011 | 4228  | 618.32  | 3.067876 | 3 K.FENLNLN chr4@164    | 3.76E-10 | 0.008981 |
| 16Mar2011  | 7698  | 559.32  | 1.204534 | 3 K.KNEISTIS chr3@765   | 5.48E-11 | 0.001648 |
| 17Dec2011  | 1346  | 753.48  | -21.061  | 2 K.KFRK+14. chr5@191   | 2.58E-11 | 0        |
| 19July2011 | 9262  | 798.42  | -8.77669 | 3 _LTVLLIYL Splice@chr  | 1.26E-10 | 0.004367 |
| 17Dec2011  | 4796  | 905.58  | 1.821803 | 2 R.RK+14.01 chr5@162   | 1.10E-10 | 0        |
| 19July2011 | 12789 | 901.99  | -20.3902 | 2 K.RDGDVE chr3@103     | 3.29E-10 | 0.006695 |
| 16Mar2011  | 336   | 591.29  | 13.09321 | 2 _SRLDST chrX@374      | 1.13E-10 | 0.003249 |
| 19July2011 | 10066 | 1082.54 | -0.11287 | 2 K.K+14.016 chr3@405   | 3.51E-10 | 0.0072   |
| 16Mar2011  | 13797 | 804.39  | -23.7029 | 2 G.EDCK+14 chr5@166    | 1.48E-10 | 0.004198 |
| 16Mar2011  | 13457 | 804.39  | -23.7029 | 2 G.EDCK+14 chr5@166    | 4.16E-10 | 0.008938 |
| 16Mar2011  | 11955 | 804.4   | -11.2437 | 2 G.EDCK+14 chr5@166    | 1.78E-10 | 0.003894 |
| 16Mar2011  | 8008  | 438.91  | -26.5746 | 3 K.INKTIKNC Splice@chr | 7.64E-11 | 0.002546 |
| 16Mar2011  | 13651 | 858.93  | 8.3238   | 2 R.DFM+15. chr4@294    | 1.35E-11 | 1.55E-04 |
| 16Mar2011  | 13280 | 858.92  | -3.34375 | 2 R.DFM+15. chr4@294    | 1.47E-10 | 0.004802 |
| 16Mar2011  | 17488 | 755.37  | 19.04139 | 4 R.DSANLM Splice@chr   | 1.99E-10 | 0.004695 |
| 19July2011 | 8204  | 800.44  | -28.8079 | 3 G.SDIVAFEI chr1@135   | 1.79E-10 | 0.005901 |
| 16Mar2011  | 13016 | 550.35  | 0.777742 | 2 R.QIVK+14. chr1@119   | 3.50E-10 | 0.0097   |
| 16Mar2011  | 4053  | 979.49  | -14.484  | 1 K.NGILENYI chr3@119   | 1.73E-10 | 0.006291 |
| 16Mar2011  | 20068 | 1100.61 | 16.76327 | 2 K.DRWIRRI chrX@139    | 2.38E-10 | 0.006039 |
| 19July2011 | 10662 | 772.4   | -22.7696 | 3 _VLCEK+1 chr2@119     | 7.28E-11 | 0.001725 |
| 16Mar2011  | 12181 | 1064.23 | 0.326075 | 3 K.QKKMLQ chr1@578     | 4.46E-10 | 0.009785 |

|            |       |         |          |                         |          |          |
|------------|-------|---------|----------|-------------------------|----------|----------|
| 19July2011 | 363   | 409.72  | 19.71265 | 2 K.WGTTPTI chr2@8225   | 5.05E-11 | 0.001626 |
| 19July2011 | 4771  | 556.81  | -8.45565 | 4 K.RK+14.01 chr4@6150  | 3.15E-10 | 0.009715 |
| 16Mar2011  | 16839 | 972.44  | -27.5816 | 2 R.SENLWQ chr1@1484    | 5.76E-11 | 0.001529 |
| 16Mar2011  | 11800 | 1162.22 | 6.187183 | 3 _..HTGPGVI Splice@chr | 1.76E-10 | 0.00442  |
| 16Mar2011  | 12480 | 1162.22 | 6.187183 | 3 _..HTGPGVI Splice@chr | 1.02E-10 | 0.003251 |
| 16Mar2011  | 4284  | 651.34  | 0.563114 | 2 R.QEDKNG chr1@9825    | 1.52E-10 | 0.003824 |
| 16Mar2011  | 16286 | 1098.57 | -18.553  | 2 V.YQFVSYY chr2@6145   | 2.56E-11 | 0.001067 |
| 19July2011 | 12569 | 605.33  | -27.8746 | 3 K.K+14.016 chrX@3811  | 1.91E-10 | 0.003937 |
| 17Dec2011  | 5779  | 756.47  | 17.98997 | 3 R.K+14.016 chr1@3068  | 2.16E-11 | 0.001649 |
| 19July2011 | 3733  | 535.28  | -22.581  | 2 S.FAAVFGS chrX@3661   | 4.20E-10 | 0.009202 |
| 19July2011 | 4584  | 535.29  | -3.94288 | 2 S.FAAVFGS chrX@3661   | 1.71E-10 | 0.004439 |
| 16Mar2011  | 7451  | 537.81  | -4.94861 | 2 _..IIMITNVN chr2@1226 | 3.74E-10 | 0.008217 |
| 16Mar2011  | 7992  | 537.81  | -4.94861 | 2 _..IIMITNVN chr2@1226 | 2.61E-10 | 0.006524 |
| 19July2011 | 10508 | 868.43  | -17.142  | 2 K.KCIGTECH Splice@chr | 2.51E-10 | 0.006725 |
| 16Mar2011  | 16465 | 872.95  | -28.9788 | 2 K.RERKDM- chr1@4575   | 2.70E-10 | 0.005489 |
| 19July2011 | 11755 | 910.81  | 3.602415 | 3 K.MYFLKTF chr5@6001   | 2.12E-11 | 6.55E-04 |
| 16Mar2011  | 418   | 572.31  | -16.9461 | 2 R.ENRKIETI chr4@1337  | 2.16E-10 | 0.004284 |
| 16Mar2011  | 15208 | 872.95  | 9.981942 | 2 R.LTTCLRTV Splice@chr | 4.33E-10 | 0.0091   |
| 19July2011 | 11552 | 977.06  | 11.41931 | 2 K.SCIRKIDG chr1@4715  | 4.07E-11 | 8.20E-04 |
| 16Mar2011  | 14917 | 1028.49 | -7.48468 | 2 K.YFFFFFQI Splice@chr | 1.67E-10 | 0.006313 |
| 16Mar2011  | 22277 | 1113.58 | 22.60263 | 2 K.KCFQSSD chr4@1027   | 3.42E-10 | 0.00676  |
| 19July2011 | 7474  | 781.36  | -27.6873 | 4 _..TAMKM+ Splice@chr  | 9.33E-11 | 0.002119 |
| 19July2011 | 10864 | 816.77  | -14.3652 | 3 _..QTLFLM+ Splice@chr | 3.31E-10 | 0.006597 |
| 19July2011 | 1132  | 661.37  | 23.47696 | 2 K.MCK+14. chr4@1018   | 3.76E-10 | 0.008296 |
| 16Mar2011  | 272   | 423.23  | 18.21451 | 2 R.DVDVEIR Splice@chr  | 8.09E-10 | 0.008369 |
| 19July2011 | 10141 | 877.95  | -24.198  | 2 K.LM+15.9 chr2@3710   | 2.45E-10 | 0.004615 |
| 16Mar2011  | 5887  | 552.3   | -29.4488 | 2 R.KMEVARI chr5@2905   | 9.64E-13 | 0        |
| 19July2011 | 11701 | 809.4   | -27.3309 | 2 R.LK+14.01 chr2@3748  | 2.59E-10 | 0.006243 |
| 16Mar2011  | 1390  | 441.72  | 0.069246 | 2 K.YVGNQSS chr5@9135   | 1.55E-10 | 0.005704 |
| 16Mar2011  | 1381  | 441.71  | -22.6435 | 2 K.YVGNQSS chr5@9135   | 3.92E-10 | 0.008026 |
| 16Mar2011  | 5771  | 523.92  | 25.11321 | 3 K.SM+15.9 chr1@1120   | 2.80E-10 | 0.006817 |
| 16Mar2011  | 5682  | 523.92  | 25.11321 | 3 K.SM+15.9 chr1@1120   | 2.70E-10 | 0.006153 |
| 19July2011 | 1647  | 408.73  | -7.03575 | 2 R.EVVEGRK chr5@1071   | 2.83E-10 | 0.00708  |
| 16Mar2011  | 5441  | 992.47  | -11.8293 | 1 _..RMENWC Splice@chr  | 8.70E-11 | 0.002111 |
| 16Mar2011  | 2448  | 693.34  | -20.6862 | 2 R.M+15.99 chr4@1237   | 2.15E-10 | 0.004562 |
| 19July2011 | 9818  | 757.89  | 9.402326 | 2 L.VM+15.9 chr3@5707   | 2.87E-10 | 0.008323 |
| 16Mar2011  | 4748  | 566.65  | -2.1221  | 3 R.QISGFM+ Splice@chr  | 3.84E-10 | 0.009432 |
| 17Dec2011  | 3781  | 822.52  | 27.57671 | 3 G.PGLGLGL chr2@8780   | 4.62E-11 | 0.004878 |
| 16Mar2011  | 16081 | 902.54  | -28.5309 | 1 R.PFGVVVK chr2@1360   | 1.23E-10 | 0.003244 |
| 16Mar2011  | 16902 | 902.54  | -28.5309 | 1 R.PFGVVVK chr2@1360   | 1.06E-10 | 0.003266 |
| 16Mar2011  | 16100 | 902.54  | -28.5309 | 1 R.PFGVVVK chr2@1360   | 2.30E-10 | 0.004473 |
| 19July2011 | 1877  | 451.27  | 3.885917 | 3 R.VLYLLKFY Splice@chr | 2.61E-10 | 0.007031 |
| 19July2011 | 1793  | 451.27  | 3.885917 | 3 R.VLYLLKFY Splice@chr | 1.42E-10 | 0.002885 |
| 16Mar2011  | 18823 | 900.98  | 6.413698 | 2 R.YLFSLHP\ chrX@7644  | 2.11E-10 | 0.004616 |
| 16Mar2011  | 19109 | 956.77  | -17.6771 | 4 K.FKILTKYS chrX@1081  | 3.27E-10 | 0.008075 |
| 16Mar2011  | 18479 | 956.77  | -17.6771 | 4 K.FKILTKYS chrX@1081  | 1.89E-10 | 0.004003 |
| 19July2011 | 9191  | 900.45  | 21.28728 | 2 R.ISRQAGY chr4@6044   | 1.50E-10 | 0.003294 |

|            |       |         |          |                         |          |          |
|------------|-------|---------|----------|-------------------------|----------|----------|
| 16Mar2011  | 5891  | 598.33  | 18.15455 | 2 R.FKWIGAS Splice@chr  | 7.94E-11 | 0.003348 |
| 16Mar2011  | 5841  | 598.33  | 18.15455 | 2 R.FKWIGAS Splice@chr  | 3.00E-10 | 0.009829 |
| 16Mar2011  | 15033 | 739.4   | 22.1284  | 2 _LSIFGLRN chr1@1307   | 1.60E-10 | 0.002979 |
| 16Mar2011  | 18996 | 853.72  | -2.26667 | 3 K.EAVLLSV! chr4@5308  | 3.17E-10 | 0.009773 |
| 16Mar2011  | 19214 | 853.72  | -2.26667 | 3 K.EAVLLSV! chr4@5308  | 2.58E-11 | 8.64E-04 |
| 16Mar2011  | 19259 | 853.72  | -2.26667 | 3 K.EAVLLSV! chr4@5308  | 2.01E-11 | 5.95E-04 |
| 16Mar2011  | 18950 | 853.72  | -2.26667 | 3 K.EAVLLSV! chr4@5308  | 6.83E-11 | 0.002307 |
| 16Mar2011  | 18761 | 853.4   | 14.79849 | 3 K.EAVLLSV! chr4@5308  | 7.22E-12 | 2.89E-04 |
| 16Mar2011  | 18452 | 853.73  | 9.476647 | 3 K.EAVLLSV! chr4@5308  | 5.20E-12 | 2.89E-04 |
| 16Mar2011  | 16171 | 1071.11 | 4.023996 | 2 K.NRFFLEKI chr1@1448  | 2.41E-10 | 0.004646 |
| 19July2011 | 9392  | 834.44  | -21.0656 | 2 _KYLFFVEF chr3@1094   | 2.06E-10 | 0.005481 |
| 16Mar2011  | 1668  | 569.81  | 6.974855 | 2 K.CSLNFRIT chr1@1296  | 2.75E-10 | 0.007484 |
| 19July2011 | 531   | 415.22  | -14.8927 | 3 K.KNQFPTA chr1@2207   | 1.92E-10 | 0.005367 |
| 16Mar2011  | 16312 | 857.52  | 14.5827  | 2 K.QRFVIFM Splice@chr  | 3.43E-10 | 0.009567 |
| 19July2011 | 10225 | 711.87  | 17.43004 | 4 R.ALRRNRH chr4@2892   | 3.57E-11 | 0.001711 |
| 16Mar2011  | 22158 | 762.11  | 7.622694 | 3 L.KLINEYFL chr4@1730  | 1.77E-10 | 0.003517 |
| 19July2011 | 3137  | 791.38  | 10.65693 | 2 R.FSFLMFF chrX@5471   | 2.76E-10 | 0.006115 |
| 16Mar2011  | 8587  | 466.25  | -2.49286 | 3 K.HREGNIS chr5@6762   | 3.43E-10 | 0.00676  |
| 16Mar2011  | 18778 | 1169.13 | 0.027055 | 2 _KRWNRV chr1@1305     | 2.19E-10 | 0.006605 |
| 16Mar2011  | 17758 | 940.51  | -10.7192 | 2 R.NIYFYSK\ chrX@3706  | 2.79E-10 | 0.006656 |
| 19July2011 | 5719  | 631.36  | -0.1291  | 3 K.PEPK+14. chr4@3015  | 1.74E-10 | 0.00523  |
| 16Mar2011  | 16870 | 780.64  | -29.2002 | 4 _NWEISEK chr2@5548    | 3.35E-10 | 0.00676  |
| 19July2011 | 1125  | 581.28  | -29.731  | 3 K.YSEKTSTH chr1@1250  | 5.54E-11 | 0.001608 |
| 19July2011 | 10607 | 695.87  | -8.92035 | 2 K.KNDGTIN chr5@1917   | 2.27E-10 | 0.005677 |
| 16Mar2011  | 6270  | 435.25  | -4.00582 | 2 K.KISAHGTI chr4@1727  | 4.69E-10 | 0.00974  |
| 16Mar2011  | 6215  | 435.25  | -4.00582 | 2 K.KISAHGTI chr4@1727  | 2.72E-10 | 0.00548  |
| 17Dec2011  | 1752  | 486.27  | 4.031281 | 2 K.VLVDSYFI Splice@chr | 1.35E-10 | 0.001527 |
| 16Mar2011  | 5722  | 586.31  | -18.6752 | 3 _LQIKCVGI chrX@1368   | 2.05E-10 | 0.004851 |
| 16Mar2011  | 7614  | 586.32  | -1.56384 | 3 _LQIKCVGI chrX@1368   | 1.92E-10 | 0.00702  |
| 17Dec2011  | 5196  | 822.52  | 15.94915 | 3 K.FQK+14.( chr4@1497  | 2.16E-10 | 0.005766 |
| 16Mar2011  | 11549 | 930.95  | -0.49136 | 2 R.IVYSGFC( chr5@7824  | 1.54E-10 | 0.003494 |
| 19July2011 | 8568  | 601.35  | -3.25334 | 4 L.AIDELLM! Splice@chr | 2.70E-10 | 0.007785 |
| 19July2011 | 1729  | 582.3   | -4.26995 | 3 K.RKWTGC Splice@chr   | 8.06E-11 | 0.00436  |
| 19July2011 | 2292  | 582.3   | -4.26995 | 3 K.RKWTGC Splice@chr   | 2.42E-11 | 0.00159  |
| 19July2011 | 1971  | 582.3   | -4.26995 | 3 K.RKWTGC Splice@chr   | 2.43E-11 | 4.21E-04 |
| 16Mar2011  | 11654 | 647.35  | -2.64408 | 2 R.ERDIFTLF chrX@7809  | 1.43E-10 | 0.003247 |
| 19July2011 | 1340  | 514.28  | 9.632112 | 2 K.SLSEELPP chr2@5890  | 1.97E-10 | 0.003971 |
| 16Mar2011  | 2563  | 464.29  | -23.3336 | 3 K.K+14.016 chr3@9284  | 4.53E-10 | 0.009096 |
| 16Mar2011  | 9690  | 1018.02 | 14.68198 | 2 F.QADADL1 chr2@7791   | 3.09E-21 | 0        |
| 19July2011 | 1490  | 445.24  | -17.6437 | 3 K.MLLMSRI chrX@3475   | 1.48E-10 | 0.005008 |
| 16Mar2011  | 10464 | 749.9   | 11.62319 | 2 R.GRYAEKP chr3@4899   | 8.14E-11 | 0.002525 |
| 16Mar2011  | 14402 | 810.91  | 8.666607 | 2 K.FPSEDSIS Splice@chr | 3.71E-12 | 1.56E-04 |
| 16Mar2011  | 20420 | 658.7   | -2.25824 | 3 K.EMINALS chr4@1164   | 9.19E-11 | 0.002243 |
| 16Mar2011  | 22162 | 658.36  | -10.7705 | 3 K.EMINALS chr4@1164   | 1.23E-10 | 0.002983 |
| 17Dec2011  | 2640  | 655.42  | 7.741233 | 2 R.KKGKKVF chr3@1355   | 1.51E-11 | 0        |
| 16Mar2011  | 14295 | 870.47  | -4.49542 | 1 K.ATTQRHF chr2@6975   | 2.77E-10 | 0.008652 |
| 19July2011 | 4142  | 530.28  | -22.2945 | 3 K.WRSNK+ chr4@1335    | 1.34E-10 | 0.002689 |

|            |       |         |          |                          |          |          |
|------------|-------|---------|----------|--------------------------|----------|----------|
| 19July2011 | 9993  | 474.27  | -8.59772 | 3 R.HYIKGTQ chr1@1375    | 1.04E-10 | 0.004056 |
| 17Dec2011  | 3456  | 877.45  | -25.7234 | 1 _..ARNTSWI chr1@3496   | 1.00E-10 | 0        |
| 19July2011 | 3239  | 449.59  | 28.733   | 3 R.ETRCAGN Splice@chr   | 2.07E-10 | 0.00461  |
| 16Mar2011  | 15952 | 876.99  | -27.8001 | 2 K.SLRWQP/ Splice@chr   | 2.42E-10 | 0.006257 |
| 16Mar2011  | 21266 | 790.4   | 0.002722 | 1 R.GTDGQR chr1@1125     | 1.42E-10 | 0.00472  |
| 19July2011 | 27    | 403.7   | 3.258718 | 2 K.ASVSGEE chr5@4537    | 6.57E-11 | 0.004325 |
| 19July2011 | 9946  | 808.77  | 14.00413 | 3 M.FCSK+14 chr3@9635    | 2.47E-10 | 0.005966 |
| 16Mar2011  | 7032  | 443.24  | -2.94433 | 3 _..TASPEAG chr2@1415   | 3.06E-10 | 0.006179 |
| 16Mar2011  | 6149  | 443.23  | -25.4869 | 3 _..TASPEAG chr2@1415   | 2.73E-10 | 0.00844  |
| 19July2011 | 10327 | 779.73  | -19.7325 | 3 K.WIGGPCI Splice@chr   | 1.61E-10 | 0.005165 |
| 19July2011 | 11232 | 540.28  | -3.69722 | 3 _..SAYNFEIN chrX@3687  | 2.91E-11 | 8.44E-04 |
| 16Mar2011  | 5374  | 445.57  | -23.9505 | 3 F.QGNGYIS chr1@5015    | 2.07E-10 | 0.004179 |
| 16Mar2011  | 17795 | 1040.55 | -17.3569 | 2 _..FHLIFSPS chrX@6038  | 3.02E-10 | 0.006026 |
| 19July2011 | 11962 | 747.74  | 16.60115 | 3 K.MENKISV chrX@1288    | 9.03E-11 | 0.00232  |
| 19July2011 | 9005  | 578.04  | -20.9891 | 3 K.KIKK+14.1 chr2@1490  | 3.80E-10 | 0.008984 |
| 16Mar2011  | 1554  | 505.26  | -19.4267 | 2 R.TTVFDSL chr1@9486    | 3.47E-10 | 0.008571 |
| 16Mar2011  | 843   | 491.23  | 13.44673 | 2 R.ENFQNSS chr2@4794    | 2.97E-10 | 0.006737 |
| 16Mar2011  | 19291 | 1129.12 | -17.7457 | 2 _..QFFLSKH Splice@chr  | 6.17E-11 | 0.002322 |
| 19July2011 | 7445  | 864.44  | 14.58468 | 4 R.LCK+14.0 chrX@9037   | 2.30E-10 | 0.005495 |
| 16Mar2011  | 17639 | 738.89  | -26.7749 | 2 R.TTRTTRT! chr3@1098   | 8.53E-11 | 0.002711 |
| 16Mar2011  | 13135 | 965.76  | -8.14688 | 4 R.FPHFRAS chr1@4387    | 3.68E-11 | 0.001362 |
| 16Mar2011  | 15700 | 965.76  | -8.14688 | 4 R.FPHFRAS chr1@4387    | 1.97E-10 | 0.004179 |
| 19July2011 | 862   | 658.34  | -1.67135 | 1 R.DVASAVF chrX@1456    | 6.35E-11 | 0.002572 |
| 16Mar2011  | 17439 | 857.43  | -21.6407 | 2 R.NKFNLFs chrX@1111    | 2.49E-10 | 0.005853 |
| 16Mar2011  | 20162 | 1115.59 | -13.7773 | 2 R.YYSKYYS chr2@6785    | 3.10E-10 | 0.006119 |
| 16Mar2011  | 13326 | 679.38  | 21.68395 | 2 R.PTVIPNN chr4@3497    | 2.96E-10 | 0.007106 |
| 16Mar2011  | 13272 | 679.38  | 21.68395 | 2 R.PTVIPNN chr4@3497    | 4.43E-10 | 0.009096 |
| 16Mar2011  | 21873 | 947.46  | -27.8582 | 3 _..MKNFQK chr4@4285    | 6.35E-11 | 0.002518 |
| 16Mar2011  | 11106 | 730.87  | -3.26139 | 2 K.TKIWVFG chr5@3805    | 4.66E-10 | 0.009785 |
| 16Mar2011  | 17695 | 849.92  | -24.4448 | 2 R.FLTENSM chrX@2505    | 9.46E-10 | 0.009304 |
| 19July2011 | 4283  | 600.34  | -27.0883 | 2 _..VMVRAS Splice@chr   | 4.16E-10 | 0.009537 |
| 16Mar2011  | 1773  | 622.33  | -13.3597 | 2 K.TEDHAKA chr1@5922    | 3.55E-10 | 0.008602 |
| 16Mar2011  | 12215 | 622.33  | 3.688505 | 2 K.EREREKEi chrX@1638   | 2.25E-10 | 0.005898 |
| 16Mar2011  | 6762  | 563.25  | -16.2832 | 2 K.YDGLVEG chr5@1035    | 9.64E-11 | 0.001703 |
| 16Mar2011  | 6748  | 563.25  | -16.2832 | 2 K.YDGLVEG chr5@1035    | 3.30E-11 | 2.29E-04 |
| 16Mar2011  | 933   | 410.22  | 27.84264 | 3 R.SLEFEFLS chr2@3342   | 2.08E-10 | 0.005436 |
| 19July2011 | 10198 | 1064.51 | -15.9161 | 3 K.SFM+15.! Splice@chr  | 1.74E-10 | 0.005229 |
| 16Mar2011  | 12067 | 568.6   | -0.68019 | 3 R.YEK+14.0 chrX@1546   | 4.92E-10 | 0.009947 |
| 16Mar2011  | 12023 | 568.6   | -0.68019 | 3 R.YEK+14.0 chrX@1546   | 3.04E-10 | 0.006715 |
| 19July2011 | 4284  | 666.34  | -21.3838 | 3 K.IKASNM+ chr3@5246    | 2.64E-10 | 0.005291 |
| 16Mar2011  | 3135  | 572.28  | -25.3206 | 2 R.WGTSRPI chr5@1621    | 1.94E-10 | 0.005944 |
| 16Mar2011  | 1997  | 504.29  | -20.6162 | 2 K.KVFLEFPi chrX@4430   | 1.07E-09 | 0.009832 |
| 16Mar2011  | 15147 | 883.47  | 6.91651  | 2 _..FQNEIVIII chr5@6695 | 3.48E-10 | 0.00696  |
| 19July2011 | 10361 | 768.41  | -0.74232 | 3 R.HALSTAV chr1@3906    | 3.60E-10 | 0.00823  |
| 16Mar2011  | 13302 | 711.88  | -26.1006 | 2 K.M+15.99 chr1@8787    | 2.54E-10 | 0.006453 |
| 19July2011 | 6157  | 679.34  | -29.0621 | 2 R.KKNTDFS chrX@9882    | 4.12E-10 | 0.008037 |
| 17Dec2011  | 1011  | 902.47  | -27.4205 | 1 R.IPESTVTR chr3@2187   | 3.41E-11 | 0        |

|            |       |         |          |                         |          |          |
|------------|-------|---------|----------|-------------------------|----------|----------|
| 16Mar2011  | 4231  | 404.53  | -1.81507 | 3 R.CAPSKST' chr1@356   | 3.14E-10 | 0.006574 |
| 16Mar2011  | 4177  | 404.53  | -1.81507 | 3 R.CAPSKST' chr1@356   | 2.36E-10 | 0.004473 |
| 19July2011 | 11805 | 954.97  | -15.4706 | 4 R.K+14.016 Splice@chr | 1.66E-10 | 0.003848 |
| 16Mar2011  | 14590 | 852.42  | 6.85145  | 2 _FFPYFHYI chr2@397    | 2.52E-10 | 0.005559 |
| 16Mar2011  | 13026 | 751.89  | -7.15299 | 2 R.RK+14.01 chr3@800   | 2.98E-10 | 0.007761 |
| 19July2011 | 8923  | 832.2   | -25.4064 | 4 K.RINDISPR Splice@chr | 1.82E-10 | 0.00588  |
| 16Mar2011  | 7754  | 464.72  | -10.1349 | 2 R.LFDYENK chrX@536    | 5.22E-10 | 0.006338 |
| 16Mar2011  | 14695 | 835.95  | -24.1842 | 4 K.TTVK+14. chr1@987   | 1.46E-10 | 0.003692 |
| 19July2011 | 4055  | 629.83  | -16.1719 | 2 R.SK+14.01 chr5@176   | 2.59E-10 | 0.006127 |
| 16Mar2011  | 937   | 708.4   | 26.2937  | 2 R.AKYCLSLf chr4@126   | 2.74E-10 | 0.008606 |
| 17Dec2011  | 240   | 455.29  | 28.51796 | 2 R.RAINVKA Splice@chr  | 2.73E-11 | 0        |
| 16Mar2011  | 15756 | 1088.58 | 11.78546 | 2 _DMSYQSI chr4@138     | 2.33E-10 | 0.006239 |
| 16Mar2011  | 5000  | 744.38  | -4.60123 | 1 K.NSNVPGf chr4@158    | 2.73E-10 | 0.006354 |
| 16Mar2011  | 3321  | 586.34  | -29.196  | 2 K.KHRKISFC chr1@113   | 3.61E-10 | 0.009243 |
| 16Mar2011  | 3087  | 586.34  | -29.196  | 2 K.KHRKISFC chr1@113   | 4.04E-10 | 0.008695 |
| 17Dec2011  | 457   | 818.44  | 12.24553 | 1 K.DIPYTLF' chr4@395   | 2.90E-10 | 0.009021 |
| 16Mar2011  | 1108  | 545.31  | 2.91551  | 2 R.QVTDMV chr2@236     | 4.13E-10 | 0.009837 |
| 17Dec2011  | 5903  | 1127.59 | -28.1636 | 4 _FLYQLNR chrX@608     | 3.57E-11 | 0.004637 |
| 16Mar2011  | 7765  | 460.25  | -17.4268 | 2 K.YPGIGGI' chr5@166   | 4.91E-10 | 0.009096 |
| 17Dec2011  | 8534  | 938.49  | 23.41962 | 2 S.FK+14.01 chr1@179   | 1.01E-10 | 0.008906 |
| 16Mar2011  | 19968 | 979.5   | -18.8639 | 3 K.EWLNK+ chrX@157     | 2.15E-10 | 0.004713 |
| 16Mar2011  | 20053 | 1036.55 | 8.168289 | 2 C.LLEM+15 chr4@983    | 2.12E-10 | 0.005001 |
| 19July2011 | 8179  | 836.2   | -17.3058 | 4 R.ENAWPN chrX@383     | 1.18E-11 | 9.76E-04 |
| 19July2011 | 5789  | 624.83  | -7.21774 | 4 _RISSHEM chr4@992     | 2.81E-10 | 0.005635 |
| 16Mar2011  | 13514 | 730.39  | 23.23937 | 2 _KVEMK+1 chr5@186     | 1.72E-10 | 0.004292 |
| 16Mar2011  | 13251 | 730.39  | 23.23937 | 2 _KVEMK+1 chr5@186     | 2.21E-10 | 0.004475 |
| 16Mar2011  | 13962 | 730.39  | 23.23937 | 2 _KVEMK+1 chr5@186     | 4.52E-11 | 0.001307 |
| 16Mar2011  | 12849 | 730.39  | 23.23937 | 2 _KVEMK+1 chr5@186     | 2.74E-10 | 0.00844  |
| 16Mar2011  | 18862 | 1023.04 | 3.523458 | 2 K.QFK+14.( chrX@109   | 3.42E-10 | 0.007529 |
| 16Mar2011  | 17866 | 751.37  | -2.66408 | 4 R.NRSGRAS chr2@531    | 1.82E-10 | 0.005701 |
| 16Mar2011  | 14232 | 667.91  | 10.34191 | 2 K.K+14.016 chr1@361   | 4.59E-10 | 0.009439 |
| 19July2011 | 9886  | 684.01  | -4.37987 | 3 K.NLMHSH Splice@chr   | 1.46E-10 | 0.003294 |
| 16Mar2011  | 8963  | 485.3   | -18.0219 | 2 _K+14.016 chr5@193    | 5.26E-10 | 0.00948  |
| 16Mar2011  | 1245  | 515.8   | -5.51643 | 2 K.NNELSILv chrX@135   | 1.63E-10 | 0.004266 |
| 16Mar2011  | 10401 | 543.78  | -17.542  | 4 R.HISGQM- chr4@279    | 9.69E-11 | 0.00278  |
| 19July2011 | 1700  | 424.24  | -12.4583 | 3 R.ELQPTPT' Splice@chr | 3.11E-10 | 0.006396 |
| 19July2011 | 8092  | 480.92  | -8.61027 | 3 K.LDFSSILN chr4@149   | 1.31E-10 | 0.003021 |
| 17Dec2011  | 4201  | 760.38  | -3.77765 | 2 R.LVVYGAN Splice@chr  | 3.71E-12 | 0        |
| 17Dec2011  | 4222  | 760.38  | -3.77765 | 2 R.LVVYGAN Splice@chr  | 6.88E-12 | 0        |
| 17Dec2011  | 6065  | 760.38  | -3.77765 | 2 R.LVVYGAN Splice@chr  | 1.20E-11 | 0.001894 |
| 17Dec2011  | 6095  | 760.38  | -3.77765 | 2 R.LVVYGAN Splice@chr  | 1.23E-11 | 0.001894 |
| 17Dec2011  | 4782  | 760.38  | -3.77765 | 2 R.LVVYGAN Splice@chr  | 1.68E-12 | 0        |
| 17Dec2011  | 4758  | 760.38  | -3.77765 | 2 R.LVVYGAN Splice@chr  | 1.61E-13 | 0        |
| 17Dec2011  | 6449  | 760.38  | -3.77765 | 2 R.LVVYGAN Splice@chr  | 6.27E-13 | 0        |
| 17Dec2011  | 6428  | 760.38  | -3.77765 | 2 R.LVVYGAN Splice@chr  | 7.82E-13 | 0        |
| 17Dec2011  | 4223  | 760.38  | -3.77765 | 2 R.LVVYGAN Splice@chr  | 2.79E-12 | 0.005731 |
| 17Dec2011  | 4480  | 760.38  | -3.77765 | 2 R.LVVYGAN Splice@chr  | 2.26E-13 | 0        |

|            |       |         |          |                          |          |          |
|------------|-------|---------|----------|--------------------------|----------|----------|
| 17Dec2011  | 4280  | 760.38  | -3.77765 | 2 R.LVVYGAN Splice@chr   | 1.67E-12 | 0        |
| 17Dec2011  | 6550  | 760.38  | -3.77765 | 2 R.LVVYGAN Splice@chr   | 2.79E-12 | 0        |
| 19July2011 | 6925  | 678.87  | 6.573011 | 4 K.TSAAME/ chr5@1331    | 4.30E-11 | 7.76E-04 |
| 16Mar2011  | 19321 | 943.98  | -3.94829 | 2 R.K+14.016 Splice@chr  | 4.54E-10 | 0.008895 |
| 16Mar2011  | 14007 | 965.52  | 16.13688 | 2 K.FSRITSSA chrX@5792   | 7.91E-11 | 0.002194 |
| 16Mar2011  | 22247 | 974.51  | -27.9916 | 3 R.SAKSEIDI chr4@9628   | 2.30E-10 | 0.005947 |
| 19July2011 | 7493  | 689.38  | -25.2417 | 2 R.NK+14.016 chr5@6130  | 3.82E-10 | 0.009246 |
| 16Mar2011  | 8642  | 1019.59 | 25.88684 | 1 R.YQLINNV Splice@chr   | 2.18E-10 | 0.005214 |
| 19July2011 | 8897  | 786.41  | 14.19307 | 2 R.LFFDDER chr4@1261    | 1.66E-11 | 5.09E-04 |
| 16Mar2011  | 16140 | 942.01  | -20.6256 | 2 R.SKLGVK+ chr2@1101    | 9.95E-11 | 0.002894 |
| 17Dec2011  | 271   | 485.3   | 4.116985 | 3 R.VSLVSVK chr5@2052    | 1.23E-10 | 0.009386 |
| 16Mar2011  | 13200 | 842.92  | -12.2517 | 2 K.KHRKSK+ chr1@2706    | 1.64E-10 | 0.004266 |
| 16Mar2011  | 4781  | 490.3   | -18.6278 | 3 R.LIKHTLGL chr1@8532   | 9.90E-11 | 0.00337  |
| 16Mar2011  | 23317 | 972.5   | -7.16733 | 1 R.RTHQHH Splice@chr    | 8.42E-11 | 0.002337 |
| 16Mar2011  | 17526 | 677.36  | -24.4549 | 2 _CLEATIVK chrX@4745    | 1.19E-10 | 0.003727 |
| 16Mar2011  | 9759  | 646.84  | 1.228582 | 2 K.LVM+15. Splice@chr   | 1.61E-10 | 0.003958 |
| 19July2011 | 4807  | 552.29  | 8.225366 | 4 K.KSSKSK+ Splice@chr   | 9.99E-11 | 0.002224 |
| 19July2011 | 4447  | 632.09  | -24.4683 | 4 R.SLSRLEIR Splice@chr  | 5.51E-11 | 0.002433 |
| 19July2011 | 1279  | 830.48  | 14.73726 | 1 R.TVSRNPR chr4@9615    | 2.96E-10 | 0.007229 |
| 16Mar2011  | 13284 | 950.46  | 27.77172 | 2 R.WCEK+14 Splice@chr   | 9.68E-11 | 0.002894 |
| 16Mar2011  | 1437  | 574.36  | 24.69774 | 2 K.EIIAAAIK' Splice@chr | 2.85E-11 | 2.69E-04 |
| 19July2011 | 5548  | 419.57  | 7.388319 | 3 C.AAELESE Splice@chr   | 1.90E-10 | 0.004796 |
| 16Mar2011  | 20724 | 865.95  | -15.5948 | 2 K.YTNFLIVF chr1@2948   | 1.44E-11 | 5.09E-04 |
| 17Dec2011  | 3658  | 828.52  | -12.2866 | 2 K.KRMK+14 Splice@chr   | 1.68E-10 | 0.008264 |
| 19July2011 | 6800  | 473.92  | 1.290625 | 3 K.K+14.016 chr4@2636   | 4.37E-10 | 0.009579 |
| 19July2011 | 1175  | 587.3   | 4.892896 | 2 Q.NAVEQE' Splice@chr   | 2.64E-12 | 2.23E-04 |
| 19July2011 | 9969  | 776.43  | -12.9086 | 2 R.KIIFCNST chr2@1122   | 1.09E-10 | 0.002889 |
| 19July2011 | 6616  | 671.37  | -24.0361 | 2 T.FNIVHTQ Splice@chr   | 3.91E-10 | 0.008466 |
| 19July2011 | 86    | 511.24  | 12.68013 | 3 R.GGDGGA chr3@2778     | 3.06E-15 | 0        |
| 19July2011 | 7883  | 685.88  | 4.188613 | 2 K.IVPGGGA chrX@1570    | 4.74E-17 | 0        |
| 19July2011 | 8563  | 762.4   | 0.669255 | 3 _FYSM+15 chrX@9985     | 2.33E-10 | 0.005396 |
| 19July2011 | 10990 | 504.78  | 6.126659 | 2 R.FPANFRC chr5@2004    | 2.98E-10 | 0.007032 |
| 19July2011 | 586   | 562.31  | -13.4391 | 2 R.FYLLYLYK Splice@chr  | 4.72E-11 | 0.001238 |
| 19July2011 | 11026 | 504.78  | 6.126659 | 2 R.FPANFRC chr5@2004    | 4.46E-10 | 0.009715 |
| 19July2011 | 1249  | 412.23  | 25.3069  | 2 R.IASYQGG chrX@1679    | 3.03E-11 | 8.44E-04 |
| 19July2011 | 6562  | 671.37  | -24.0361 | 2 T.FNIVHTQ Splice@chr   | 4.55E-10 | 0.009715 |
| 19July2011 | 7942  | 685.88  | 4.188613 | 2 K.IVPGGGA chrX@1570    | 4.58E-17 | 0        |
| 19July2011 | 1236  | 587.3   | 4.892896 | 2 Q.NAVEQE' Splice@chr   | 6.51E-12 | 2.23E-04 |
| 19July2011 | 977   | 632.33  | 21.173   | 2 _KENEVEK Splice@chr    | 1.61E-10 | 0.004075 |
| 19July2011 | 1006  | 401.23  | 6.55768  | 2 R.IEAGGGC chr5@8776    | 3.86E-11 | 0.001044 |
| 19July2011 | 11177 | 787.88  | 12.22608 | 2 K.FWREIQM chrX@1650    | 1.93E-10 | 0.005256 |
| 19July2011 | 7620  | 484.28  | 10.44055 | 3 K.ISSAIAMf chr4@7544   | 3.38E-10 | 0.00784  |
| 19July2011 | 894   | 587.3   | 4.892896 | 2 Q.NAVEQE' Splice@chr   | 1.00E-11 | 2.53E-04 |
| 19July2011 | 838   | 587.3   | 4.892896 | 2 Q.NAVEQE' Splice@chr   | 1.44E-11 | 2.53E-04 |
| 19July2011 | 10951 | 914.51  | 19.28811 | 2 K.LTRLLFIN chr2@8907   | 3.81E-10 | 0.009382 |
| 19July2011 | 2692  | 698.84  | 20.81685 | 2 G.FENIRDV Splice@chr   | 3.30E-10 | 0.007753 |
| 19July2011 | 5340  | 480.92  | -8.61027 | 3 K.LDFSSILN chr4@1495   | 3.23E-10 | 0.007753 |

|            |       |        |          |                        |          |          |
|------------|-------|--------|----------|------------------------|----------|----------|
| 19July2011 | 7361  | 555.97 | 19.65028 | 3 K.M+15.99 chr5@1600  | 1.64E-11 | 2.53E-04 |
| 19July2011 | 7299  | 685.88 | 4.188613 | 2 K.IVPGGGA chrX@1570  | 1.00E-18 | 0        |
| 19July2011 | 9653  | 819.1  | -3.35779 | 3 R.ITSSSVKN chr2@6680 | 5.80E-11 | 0.002466 |
| 19July2011 | 3250  | 588.29 | -10.2888 | 2 R.QIDKLEN chr5@2475  | 2.02E-10 | 0.005652 |
| 19July2011 | 11047 | 772.41 | -9.89356 | 3 _VLCEKK+ chr2@1198   | 1.77E-10 | 0.004904 |
| 19July2011 | 3097  | 883.39 | -18.0533 | 2 R.CAYHGKS chr5@1262  | 1.29E-10 | 0.004198 |
| 19July2011 | 4906  | 703.86 | -3.21304 | 2 Y.VVQVAID chr1@1045  | 4.75E-12 | 2.53E-04 |
| 19July2011 | 167   | 688.3  | 6.038794 | 2 R.GGDGGA chr3@2778   | 2.22E-18 | 0        |
| 19July2011 | 8303  | 762.4  | -17.8492 | 3 R.HILRQNA chr3@3082  | 4.29E-10 | 0.009674 |
| 19July2011 | 4962  | 703.86 | -3.21304 | 2 Y.VVQVAID chr1@1045  | 5.76E-14 | 0        |
| 19July2011 | 5913  | 594.32 | -27.7061 | 3 K.NSPK+14 chrX@2992  | 2.66E-10 | 0.006711 |
| 19July2011 | 931   | 412.23 | 25.3069  | 2 R.IASYQGG chrX@1679  | 3.07E-11 | 0.001658 |
| 19July2011 | 3563  | 554.95 | 17.04197 | 3 R.M+15.99 chr3@1018  | 4.54E-10 | 0.009989 |
| 19July2011 | 7415  | 555.97 | 19.65028 | 3 K.M+15.99 chr5@1600  | 7.86E-11 | 0.002819 |
| 19July2011 | 7057  | 537.82 | -9.55065 | 2 K.LIGNNVF chr3@5869  | 3.40E-10 | 0.008122 |
| 19July2011 | 11053 | 907.04 | -27.2822 | 2 R.K+14.016 chr3@9047 | 5.04E-11 | 0.002466 |
| 19July2011 | 7046  | 484.28 | 10.44055 | 3 K.ISSAIAMf chr4@7544 | 3.56E-10 | 0.008831 |
| 19July2011 | 10202 | 504.78 | 6.126659 | 2 R.FPANFRC chr5@2004  | 1.58E-10 | 0.004727 |
| 19July2011 | 857   | 735.33 | -27.5112 | 2 K.YGHANVI chr1@1065  | 1.62E-10 | 0.004727 |
| 19July2011 | 6294  | 685.88 | 4.188613 | 2 K.IVPGGGA chrX@1570  | 1.37E-13 | 0        |
| 19July2011 | 6504  | 894.5  | -14.1127 | 2 _VETGIKP Splice@chr  | 1.63E-12 | 0        |
| 19July2011 | 8488  | 589.8  | 15.96415 | 2 K.KSEIVNY chrX@8559  | 2.16E-10 | 0.009006 |
| 19July2011 | 726   | 632.33 | 21.173   | 2 _KENEVEK Splice@chr  | 1.91E-10 | 0.008361 |
| 19July2011 | 5524  | 684.87 | -26.1498 | 2 L.HLK+14.0 chrX@5908 | 6.04E-11 | 0.002875 |
| 19July2011 | 4980  | 472.29 | -0.64754 | 2 _SPLFVPKf chrX@4402  | 1.79E-10 | 0.008059 |
| 19July2011 | 2407  | 454.75 | 8.810814 | 2 K.TDLAYLG chr4@1545  | 1.21E-10 | 0.006737 |
| 19July2011 | 419   | 667.83 | -5.76644 | 2 R.RREDKSD chr4@1482  | 1.71E-11 | 9.37E-04 |
| 19July2011 | 6558  | 894    | -12.2343 | 2 _VETGIKP Splice@chr  | 9.07E-13 | 0        |
| 19July2011 | 538   | 452.25 | 14.94649 | 2 R.IAEELSNk chrX@1522 | 9.42E-11 | 0.006297 |
| 19July2011 | 3652  | 480.27 | -18.5931 | 2 K.IMVVGv chr4@8732   | 1.29E-10 | 0.006737 |
| 19July2011 | 1285  | 460.75 | 4.388206 | 2 _ATDGSSII chr5@1148  | 8.44E-11 | 0.004535 |
| 19July2011 | 6244  | 894.5  | -14.1127 | 2 _VETGIKP Splice@chr  | 4.93E-11 | 0.002439 |
| 19July2011 | 3439  | 480.78 | -1.20759 | 2 K.IMVVGv chr4@8732   | 5.40E-11 | 0.002439 |
| 19July2011 | 3215  | 462.59 | 1.368923 | 3 K.RRYDYGK chr5@9435  | 1.54E-10 | 0.007666 |
| 19July2011 | 6609  | 791.41 | 3.474929 | 2 R.CKTSTRN Splice@chr | 3.12E-11 | 0.002033 |
| 19July2011 | 7776  | 730.93 | -11.0855 | 2 _FFHKVK+ chr5@2007   | 4.03E-11 | 0.002033 |
| 19July2011 | 751   | 735.33 | -27.5112 | 2 K.YGHANVI chr1@1065  | 4.99E-11 | 0.002439 |
| 19July2011 | 6202  | 894.5  | -14.1127 | 2 _VETGIKP Splice@chr  | 2.47E-13 | 0        |
| 19July2011 | 3848  | 509.3  | -20.473  | 2 R.SSVIMLIV chr2@5767 | 2.66E-11 | 0.002033 |
| 19July2011 | 7809  | 688.84 | 13.54379 | 2 R.SFTLSMF chrX@1551  | 5.76E-11 | 0.002439 |
| 19July2011 | 4667  | 472.29 | -0.64754 | 2 _SPLFVPKf chrX@4402  | 1.30E-10 | 0.005657 |
| 19July2011 | 874   | 412.23 | 25.3069  | 2 R.IASYQGG chrX@1679  | 3.07E-11 | 0.002033 |
| 19July2011 | 7390  | 665.37 | -26.6417 | 2 Q.INNK+14 Splice@chr | 1.99E-10 | 0.009057 |
| 19July2011 | 6159  | 894.5  | -14.1127 | 2 _VETGIKP Splice@chr  | 5.79E-13 | 0        |
| 19July2011 | 5957  | 685.88 | 4.188613 | 2 K.IVPGGGA chrX@1570  | 4.10E-14 | 0        |
| 19July2011 | 4713  | 472.29 | -0.64754 | 2 _SPLFVPKf chrX@4402  | 1.30E-10 | 0.005657 |
| 19July2011 | 2557  | 495.24 | 3.025635 | 2 K.LAENDN Splice@chr  | 2.67E-11 | 0.001174 |

|            |       |        |          |                         |          |          |
|------------|-------|--------|----------|-------------------------|----------|----------|
| 19July2011 | 8520  | 480.92 | -8.61027 | 3 K.LDFSSILN chr4@1495  | 1.87E-10 | 0.005214 |
| 19July2011 | 13288 | 665.37 | -26.6417 | 2 Q.INNK+14 Splice@chr  | 2.88E-10 | 0.008007 |
| 19July2011 | 3405  | 460.25 | -17.4268 | 2 K.YPGIGGI Splice@chr  | 2.47E-10 | 0.006229 |
| 19July2011 | 14098 | 787.89 | 24.95531 | 2 K.FWREIQM chrX@1650   | 9.74E-11 | 0.002713 |
| 19July2011 | 2663  | 587.3  | 4.892896 | 2 Q.NAVEQE Splice@chr   | 9.29E-12 | 2.55E-04 |
| 19July2011 | 1722  | 632.78 | -25.4076 | 2 _KM+15.9 Splice@chr   | 1.46E-10 | 0.004007 |
| 19July2011 | 12451 | 988.04 | 8.32247  | 2 K.FDYFNMI chr4@1602   | 1.71E-10 | 0.005107 |
| 19July2011 | 8411  | 673.32 | -23.1345 | 4 _QVREMH Splice@chr    | 1.58E-10 | 0.004381 |
| 19July2011 | 10198 | 705.61 | 10.33441 | 4 R.NEGRM+ chr4@3505    | 1.23E-10 | 0.003261 |
| 19July2011 | 12036 | 760.72 | 18.35362 | 3 R.RAINGTE Splice@chr  | 2.18E-10 | 0.005332 |
| 19July2011 | 11217 | 515.29 | -6.17134 | 3 K.PNFTVILS chr4@1642  | 1.85E-10 | 0.005214 |
| 19July2011 | 13474 | 490.62 | -15.0421 | 3 _RLEQQD\ chr5@1644    | 1.19E-10 | 0.003069 |
| 19July2011 | 4094  | 471.79 | -5.7044  | 2 K.IKVNFPPI chr2@3034  | 3.15E-10 | 0.009235 |
| 19July2011 | 457   | 511.24 | 12.68013 | 3 R.GGDGGA chr3@2778    | 1.20E-10 | 0.003069 |
| 19July2011 | 6561  | 506.9  | -7.6849  | 3 _DWHHTF Splice@chr    | 1.82E-11 | 7.37E-04 |
| 19July2011 | 887   | 688.3  | 6.038794 | 2 R.GGDGGA chr3@2778    | 3.34E-17 | 0        |
| 19July2011 | 417   | 511.57 | 3.948988 | 3 R.GGDGGA chr3@2778    | 3.36E-11 | 0.001357 |
| 19July2011 | 2712  | 587.3  | 4.892896 | 2 Q.NAVEQE Splice@chr   | 2.74E-11 | 0.001174 |
| 19July2011 | 2328  | 401.56 | -6.19665 | 3 _RKDSSAV Splice@chr   | 1.75E-10 | 0.005107 |
| 19July2011 | 7386  | 452.73 | -24.0502 | 2 K.SVDLVDI chr5@8505   | 2.78E-10 | 0.007669 |
| 19July2011 | 128   | 539.79 | 19.78879 | 2 _KAGADM Splice@chr    | 2.62E-10 | 0.007113 |
| 19July2011 | 125   | 688.3  | 6.038794 | 2 R.GGDGGA chr3@2778    | 4.03E-18 | 0        |
| 19July2011 | 3723  | 509.3  | -20.473  | 2 R.SSVIMLIV chr2@5767  | 3.76E-11 | 3.94E-04 |
| 19July2011 | 8078  | 808.42 | -14.4937 | 3 K.KKCDSQE chr2@4904   | 7.16E-11 | 0.001855 |
| 19July2011 | 6755  | 634.02 | 0        | 3 K.TIDFSRK+ chr4@6082  | 2.40E-11 | 0        |
| 19July2011 | 8613  | 792.15 | -18.5783 | 4 K.SGTIFDNI Splice@chr | 4.96E-11 | 0.001504 |
| 19July2011 | 4590  | 472.29 | -0.64754 | 2 _SPLFVPKI chrX@4402   | 1.30E-10 | 0.003441 |
| 19July2011 | 4740  | 472.29 | -0.64754 | 2 _SPLFVPKI chrX@4402   | 2.61E-10 | 0.007113 |
| 19July2011 | 4357  | 791.38 | 4.865092 | 2 K.SSK+14.0 chr2@1415  | 1.25E-10 | 0.003441 |
| 19July2011 | 1566  | 793.42 | 19.33353 | 2 R.NEKYSTM Splice@chr  | 1.21E-10 | 0.003441 |
| 19July2011 | 4409  | 791.37 | -7.79959 | 2 K.SSK+14.0 chr2@1415  | 1.97E-10 | 0.005326 |
| 19July2011 | 711   | 412.23 | 25.3069  | 2 R.IASYQGG chrX@1675   | 3.07E-11 | 3.94E-04 |
| 19July2011 | 4541  | 472.29 | -0.64754 | 2 _SPLFVPKI chrX@4402   | 1.30E-10 | 0.003441 |
| 19July2011 | 602   | 451.27 | -16.5374 | 2 K.KTLVPTSI chr5@6236  | 1.22E-10 | 0.003441 |
| 19July2011 | 2650  | 486.95 | 6.196388 | 3 K.LGKLLDM Splice@chr  | 2.70E-11 | 0        |
| 19July2011 | 5060  | 800.93 | 4.654405 | 2 V.ENLNFRC chr2@1407   | 1.12E-10 | 0.003441 |
| 19July2011 | 7267  | 467.74 | 5.819355 | 2 K.NQLETAM chr1@8415   | 2.95E-10 | 0.00756  |
| 19July2011 | 7193  | 515.29 | -6.17134 | 3 K.PNFTVILS chr4@1642  | 2.67E-10 | 0.006443 |
| 19July2011 | 40    | 511.24 | 12.68013 | 3 R.GGDGGA chr3@2778    | 4.26E-12 | 0        |
| 19July2011 | 6586  | 563.27 | -13.5689 | 2 K.MSARNYI chrX@1045   | 3.45E-10 | 0.008137 |
| 19July2011 | 5398  | 472.29 | -0.64754 | 2 _SPLFVPKI chrX@4402   | 2.63E-10 | 0.006443 |
| 19July2011 | 5456  | 472.29 | -0.64754 | 2 _SPLFVPKI chrX@4402   | 3.76E-10 | 0.009189 |
| 19July2011 | 157   | 688.3  | 6.038794 | 2 R.GGDGGA chr3@2778    | 3.51E-17 | 0        |
| 19July2011 | 6596  | 481.28 | 5.337578 | 2 R.VELLNAF Splice@chr  | 1.07E-10 | 0.004236 |
| 19July2011 | 935   | 584.3  | -7.53396 | 2 R.FSLKNTEI chr4@2692  | 4.84E-11 | 0.002951 |
| 19July2011 | 5517  | 472.29 | -0.64754 | 2 _SPLFVPKI chrX@4402   | 1.30E-10 | 0.004398 |
| 19July2011 | 7356  | 515.3  | 13.29211 | 3 K.PNFTVILS chr4@1642  | 1.34E-10 | 0.003443 |

|            |      |         |          |                         |          |          |
|------------|------|---------|----------|-------------------------|----------|----------|
| 19July2011 | 7047 | 555.97  | 19.65028 | 3 K.M+15.99 chr5@1600   | 2.66E-10 | 0.006078 |
| 19July2011 | 175  | 688.3   | 6.038794 | 2 R.GGDGGA chr3@2778    | 2.47E-13 | 0        |
| 19July2011 | 2906 | 558.31  | 15.55193 | 2 R.LEIDSSNI Splice@chr | 1.47E-10 | 0.003857 |
| 19July2011 | 3546 | 702.36  | 19.55301 | 2 R.LQENVEK chr4@7382   | 3.55E-10 | 0.009102 |
| 19July2011 | 5010 | 897.42  | -27.6753 | 3 _QVREMH Splice@chr    | 1.35E-10 | 0.003443 |
| 19July2011 | 9968 | 787.89  | 24.95531 | 2 K.FWREIQM chrX@1650   | 3.26E-10 | 0.008536 |
| 19July2011 | 6989 | 664.7   | 1.197202 | 3 _PTLNK+1. chr1@6526   | 1.88E-11 | 2.70E-04 |
| 19July2011 | 5064 | 897.42  | -27.6753 | 3 _QVREMH Splice@chr    | 1.55E-10 | 0.003857 |
| 19July2011 | 4261 | 578.98  | -24.4064 | 3 R.YIIFEK+1. chrX@1746 | 2.61E-10 | 0.006078 |
| 19July2011 | 8164 | 784.42  | -26.6807 | 3 _LVK+14.0 Splice@chr  | 3.54E-10 | 0.009102 |
| 19July2011 | 932  | 439.74  | 18.7116  | 2 R.SIAMFGP chr2@4157   | 5.04E-11 | 0.001495 |
| 19July2011 | 1489 | 445.24  | -19.4181 | 3 K.KMEWEK Splice@chr   | 3.44E-10 | 0.008722 |
| 19July2011 | 5518 | 705.69  | -2.85859 | 3 R.TFSKNFTI chr4@1383  | 1.99E-10 | 0.004881 |
| 19July2011 | 9613 | 703.08  | -22.8155 | 3 K.LTK+14.0 chr5@3843  | 2.67E-10 | 0.006078 |
| 19July2011 | 2048 | 793.93  | -3.84873 | 2 R.TK+14.01 chr1@7238  | 8.87E-11 | 0.002609 |
| 19July2011 | 5685 | 472.29  | -0.64754 | 2 _SPLFVPKf chrX@4402   | 1.30E-10 | 0.003443 |
| 19July2011 | 5074 | 673.32  | -23.1345 | 4 _QVREMH Splice@chr    | 2.17E-10 | 0.005078 |
| 19July2011 | 947  | 431.75  | 11.06792 | 2 _SSGGATL chr5@6795    | 6.75E-11 | 0.001947 |
| 19July2011 | 5372 | 692.36  | -10.9471 | 2 K.KDKNAAf chr3@8925   | 3.26E-10 | 0.009051 |
| 19July2011 | 5674 | 685.88  | 4.188613 | 2 K.IVPGGGA chrX@1570   | 2.79E-16 | 0        |
| 19July2011 | 6765 | 791.9   | -15.2799 | 2 F.QFM+15. chr4@1546   | 2.38E-10 | 0.006418 |
| 19July2011 | 2783 | 509.8   | -23.773  | 2 R.SSVIMLIV chr2@5767  | 3.76E-11 | 0.001136 |
| 19July2011 | 6040 | 515.3   | 13.29211 | 3 K.PNFTVILS chr4@1642  | 2.56E-10 | 0.006684 |
| 19July2011 | 5623 | 685.88  | 4.188613 | 2 K.IVPGGGA chrX@1570   | 8.63E-19 | 0        |
| 19July2011 | 431  | 412.23  | 25.3069  | 2 R.IASYQGG chrX@1679   | 3.07E-11 | 0.001136 |
| 19July2011 | 47   | 449.58  | -4.40112 | 3 K.IPNIFQFN chr4@6000  | 1.18E-10 | 0.004086 |
| 19July2011 | 7723 | 1003.19 | 17.13413 | 3 R.CWNRRA Splice@chr   | 6.05E-11 | 0.002179 |
| 19July2011 | 173  | 565.28  | 17.52322 | 2 K.KNGSHW chr5@4571    | 2.09E-11 | 7.95E-04 |
| 19July2011 | 5706 | 664.7   | 1.197202 | 3 _PTLNK+1. chr1@6526   | 2.46E-10 | 0.006684 |
| 19July2011 | 218  | 570.79  | -16.8176 | 2 R.HLSGSAL chrX@1534   | 3.24E-10 | 0.009051 |
| 19July2011 | 767  | 460.25  | 8.040761 | 2 _ATDGSSII chr5@1148   | 6.80E-11 | 0.003162 |
| 19July2011 | 5192 | 660.37  | -16.199  | 2 K.TK+14.01 chr1@1424  | 1.96E-10 | 0.005556 |
| 19July2011 | 6240 | 772.1   | -15.8306 | 3 I.KNEFNK+ chr5@1150   | 1.84E-10 | 0.007284 |
| 19July2011 | 712  | 412.23  | 25.3069  | 2 R.IASYQGG chrX@1679   | 3.37E-11 | 0.001879 |
| 19July2011 | 3497 | 509.3   | -20.473  | 2 R.SSVIMLIV chr2@5767  | 6.61E-11 | 0.002978 |
| 19July2011 | 1127 | 460.25  | 8.040761 | 2 _ATDGSSII chr5@1148   | 1.71E-11 | 6.53E-04 |
| 19July2011 | 7679 | 792.15  | -18.5783 | 4 K.SGTIFDNI Splice@chr | 8.05E-11 | 0.003436 |
| 19July2011 | 3422 | 509.3   | -20.473  | 2 R.SSVIMLIV chr2@5767  | 9.75E-11 | 0.005034 |
| 19July2011 | 4286 | 472.29  | -0.64754 | 2 _SPLFVPKf chrX@4402   | 1.30E-10 | 0.005876 |
| 19July2011 | 1179 | 460.25  | 8.040761 | 2 _ATDGSSII chr5@1148   | 1.19E-11 | 0        |
| 19July2011 | 7547 | 787.88  | 12.22608 | 2 K.FWREIQM chrX@1650   | 7.40E-11 | 0.003436 |
| 19July2011 | 5230 | 623.03  | -18.2266 | 3 P.RNWGKG chrX@1446    | 1.46E-10 | 0.005876 |
| 19July2011 | 526  | 401.23  | 6.55768  | 2 R.IEAGGGC chr5@8776   | 1.89E-12 | 0        |
| 19July2011 | 3456 | 509.3   | -20.473  | 2 R.SSVIMLIV chr2@5767  | 1.88E-11 | 6.53E-04 |
| 19July2011 | 3865 | 509.3   | -20.473  | 2 R.SSVIMLIV chr2@5767  | 1.88E-11 | 0.002796 |
| 19July2011 | 869  | 632.78  | -25.4076 | 2 _KM+15.9 Splice@chr   | 5.74E-12 | 0.001121 |
| 19July2011 | 3796 | 509.3   | -20.473  | 2 R.SSVIMLIV chr2@5767  | 7.27E-11 | 0.003546 |

|            |       |         |          |                         |          |          |
|------------|-------|---------|----------|-------------------------|----------|----------|
| 19July2011 | 3830  | 509.3   | -20.473  | 2 R.SSVIMLIV chr2@5767  | 1.88E-11 | 0.002796 |
| 19July2011 | 3765  | 509.3   | -20.473  | 2 R.SSVIMLIV chr2@5767  | 5.15E-11 | 0.002796 |
| 19July2011 | 6852  | 760.72  | 18.35362 | 3 R.RAINGTE Splice@chr  | 1.61E-10 | 0.003623 |
| 19July2011 | 6851  | 1157.64 | -21.0019 | 2 I.KNEFNK+: chr5@1150  | 2.77E-10 | 0.005893 |
| 19July2011 | 2913  | 559.79  | 11.35993 | 2 R.DGWSIG chr4@4253    | 4.18E-11 | 0.001579 |
| 19July2011 | 6943  | 772.1   | -15.8306 | 3 I.KNEFNK+: chr5@1150  | 2.70E-10 | 0.005893 |
| 19July2011 | 8199  | 787.89  | 24.95531 | 2 K.FWREIQM chrX@1650   | 1.13E-10 | 0.001885 |
| 19July2011 | 5333  | 681.11  | -29.1535 | 4 K.K+14.016 chr5@1885  | 1.60E-10 | 0.003623 |
| 19July2011 | 128   | 539.79  | 19.78879 | 2 _KAGADM Splice@chr    | 6.05E-11 | 0.001579 |
| 19July2011 | 1104  | 474.27  | 23.04782 | 2 _VEARSTG chr5@1164    | 2.22E-10 | 0.005276 |
| 19July2011 | 3308  | 600.78  | -18.1779 | 2 R.MMFATR chr1@7088    | 4.18E-11 | 0.001579 |
| 19July2011 | 3306  | 561.32  | 25.56969 | 2 R.PDFSLNS chr3@3320   | 2.54E-12 | 0        |
| 19July2011 | 3979  | 509.3   | -20.473  | 2 R.SSVIMLIV chr2@5767  | 1.88E-11 | 4.41E-04 |
| 19July2011 | 4751  | 472.29  | -0.64754 | 2 _SPLFVPKf chrX@4402   | 1.30E-10 | 0.002231 |
| 19July2011 | 256   | 508.79  | -1.80299 | 2 K.SLVEKDV Splice@chr  | 3.53E-10 | 0.008471 |
| 19July2011 | 4637  | 703.87  | 11.02855 | 2 Y.VVQVAID chr1@1043   | 6.56E-14 | 0        |
| 19July2011 | 9935  | 730.93  | -11.0855 | 2 _FFHKVK+ chr5@2007    | 4.15E-11 | 0.001061 |
| 19July2011 | 7375  | 1034.07 | -0.82714 | 2 K.FK+14.01 Splice@chr | 3.66E-11 | 5.40E-04 |
| 19July2011 | 3912  | 746.88  | -4.29754 | 2 R.RDM+15 chrX@1565    | 2.15E-11 | 5.40E-04 |
| 19July2011 | 172   | 688.3   | 6.038794 | 2 R.GGDGGA chr3@2778    | 3.03E-19 | 0        |
| 19July2011 | 6217  | 1000.17 | -22.2213 | 3 K.SQVFSTA chrX@6089   | 2.77E-15 | 0        |
| 19July2011 | 1454  | 445.24  | -19.4181 | 3 K.KMEWEK Splice@chr   | 1.62E-10 | 0.004254 |
| 19July2011 | 72    | 511.24  | 12.68013 | 3 R.GGDGGA chr3@2778    | 3.15E-10 | 0.007429 |
| 19July2011 | 4522  | 452.73  | -24.0502 | 2 K.SVDLVDV chr5@8503   | 1.25E-10 | 0.002911 |
| 19July2011 | 8166  | 987.55  | 20.1693  | 2 K.FDYFNMI chr4@1602   | 2.39E-11 | 5.40E-04 |
| 19July2011 | 58    | 766.35  | 4.705204 | 2 R.GGDGGA chr3@2778    | 2.28E-11 | 5.40E-04 |
| 19July2011 | 926   | 587.3   | 4.892896 | 2 Q.NAVEQE Splice@chr   | 1.61E-11 | 5.40E-04 |
| 19July2011 | 8981  | 714.03  | -0.99814 | 3 R.TESFNLM chr5@1946   | 3.11E-11 | 5.40E-04 |
| 19July2011 | 3886  | 447.24  | -10.2675 | 2 K.FEIGGLEk chr4@2153  | 8.70E-11 | 0.001995 |
| 19July2011 | 9166  | 570.99  | -6.74886 | 3 K.IFTQTK+1 Splice@chr | 5.08E-10 | 0.009821 |
| 19July2011 | 3797  | 713.38  | -5.39773 | 2 L.QMTMAC chr4@7860    | 1.42E-11 | 9.00E-04 |
| 19July2011 | 7910  | 760.72  | 18.35362 | 3 R.RAINGTE Splice@chr  | 2.03E-10 | 0.003867 |
| 19July2011 | 161   | 688.3   | 6.038794 | 2 R.GGDGGA chr3@2778    | 1.89E-18 | 0        |
| 19July2011 | 6845  | 664.7   | 1.197202 | 3 _PTLNK+1 chr1@6526    | 4.01E-10 | 0.007049 |
| 19July2011 | 6675  | 654.34  | -13.7884 | 2 L.FLNSNRIS Splice@chr | 4.64E-10 | 0.008762 |
| 19July2011 | 5316  | 472.29  | -0.64754 | 2 _SPLFVPKf chrX@4402   | 2.67E-10 | 0.005187 |
| 19July2011 | 10105 | 792.16  | -5.99938 | 4 K.SGTIFDNI Splice@chr | 3.45E-11 | 0.001418 |
| 19July2011 | 7857  | 760.72  | 18.35362 | 3 R.RAINGTE Splice@chr  | 1.06E-10 | 0.001778 |
| 19July2011 | 10263 | 914.01  | 21.12538 | 2 K.LTRLLFIN chr2@8907  | 6.58E-11 | 0.001778 |
| 19July2011 | 4606  | 703.86  | -3.21304 | 2 Y.VVQVAID chr1@1043   | 1.46E-11 | 9.00E-04 |
| 19July2011 | 4474  | 452.73  | -24.0502 | 2 K.SVDLVDV chr5@8503   | 3.49E-10 | 0.006221 |
| 19July2011 | 9851  | 787.89  | 24.95531 | 2 K.FWREIQM chrX@1650   | 7.53E-11 | 0.001778 |
| 19July2011 | 9480  | 703.09  | -8.55154 | 3 K.LTK+14.0 chr5@3843  | 4.71E-10 | 0.008985 |
| 19July2011 | 960   | 412.23  | 25.3069  | 2 R.IASYQGG chrX@1679   | 3.07E-11 | 0.001418 |
| 19July2011 | 4418  | 481     | 7.348424 | 4 R.RRGSMC chrX@9772    | 2.33E-10 | 0.00476  |
| 19July2011 | 6050  | 859.14  | 2.870693 | 3 _LRFKDNC chrX@1053    | 4.08E-11 | 0.001659 |
| 19July2011 | 5364  | 472.29  | -0.64754 | 2 _SPLFVPKf chrX@4402   | 1.49E-10 | 0.002972 |

|            |       |         |          |                          |          |          |
|------------|-------|---------|----------|--------------------------|----------|----------|
| 19July2011 | 1498  | 439.23  | -12.3957 | 2 R.IDDKTSAI chr5@8738   | 1.38E-10 | 0.002739 |
| 19July2011 | 6535  | 563.28  | 4.233503 | 2 K.MSARNYI chrX@1045    | 2.51E-10 | 0.006747 |
| 19July2011 | 8960  | 771.9   | 21.37763 | 2 R.NEK+14.0 chr5@1885   | 2.88E-10 | 0.008399 |
| 19July2011 | 5202  | 472.29  | -0.64754 | 2 _SPLFVPKI chrX@4402    | 1.32E-10 | 0.004456 |
| 19July2011 | 7079  | 666.04  | -26.4313 | 3 K.LVNNNIK chr4@1598    | 5.21E-11 | 0.001429 |
| 19July2011 | 7743  | 900.45  | -8.99505 | 2 R.KMPFGN chrX@4790     | 8.03E-11 | 0.00275  |
| 19July2011 | 2259  | 454.75  | 8.810814 | 2 K.TDLAYLG chr4@1545    | 1.66E-10 | 0.004667 |
| 19July2011 | 817   | 412.23  | 25.3069  | 2 R.IASYQGG chrX@1679    | 4.94E-11 | 0.001429 |
| 19July2011 | 2224  | 693.87  | -6.6949  | 2 V.ICVAVGD chr5@1065    | 9.66E-11 | 0.003263 |
| 19July2011 | 3311  | 578.31  | 17.26868 | 3 K.FLK+14.0 chr5@7625   | 1.87E-11 | 3.18E-04 |
| 19July2011 | 5258  | 472.29  | -0.64754 | 2 _SPLFVPKI chrX@4402    | 1.40E-10 | 0.004456 |
| 19July2011 | 5431  | 472.29  | -0.64754 | 2 _SPLFVPKI chrX@4402    | 1.34E-10 | 0.004456 |
| 19July2011 | 658   | 683.36  | -11.2703 | 2 E.EVCNFVN chrX@4262    | 1.68E-10 | 0.004667 |
| 19July2011 | 4788  | 897.42  | -27.6753 | 3 _QVREMH Splice@chr     | 1.40E-10 | 0.004456 |
| 19July2011 | 7890  | 1157.65 | -12.3479 | 2 I.KNEFNK+ chr5@1150    | 1.75E-10 | 0.005165 |
| 19July2011 | 3253  | 578.31  | 17.26868 | 3 K.FLK+14.0 chr5@7625   | 3.20E-10 | 0.009768 |
| 19July2011 | 153   | 688.3   | 6.038794 | 2 R.GGDGGA chr3@2778     | 7.95E-18 | 0        |
| 19July2011 | 8520  | 770.37  | -19.5947 | 2 K.M+15.99 chr4@8975    | 2.50E-10 | 0.006747 |
| 19July2011 | 6829  | 664.7   | 1.197202 | 3 _PTLNK+1 chr1@6526     | 1.90E-11 | 3.18E-04 |
| 19July2011 | 9718  | 730.93  | -11.0855 | 2 _FFHKVK+ chr5@2007     | 7.87E-11 | 0.00275  |
| 19July2011 | 4900  | 897.43  | -16.505  | 3 _QVREMH Splice@chr     | 6.92E-11 | 0.00275  |
| 19July2011 | 6693  | 563.27  | -13.5689 | 2 K.MSARNYI chrX@1045    | 1.59E-11 | 3.11E-04 |
| 19July2011 | 6894  | 994.84  | -20.7023 | 3 K.SQVFSTA chrX@6089    | 1.70E-12 | 0        |
| 19July2011 | 4264  | 626.68  | 23.52414 | 3 R.VVDALGI Splice@chr   | 1.29E-11 | 3.11E-04 |
| 19July2011 | 9025  | 570.66  | 1.071447 | 3 K.IFTQTK+1 Splice@chr  | 3.82E-10 | 0.005952 |
| 19July2011 | 6913  | 875.44  | -14.0713 | 2 K.PLK+14.0 chr2@1070   | 1.09E-10 | 0.002406 |
| 19July2011 | 9006  | 855.48  | -6.07153 | 2 K.IFTQTK+1 Splice@chr  | 4.84E-10 | 0.007691 |
| 19July2011 | 9003  | 672.34  | 16.60654 | 2 K.WELEVEL chrX@4091    | 4.89E-10 | 0.007909 |
| 19July2011 | 7388  | 762.4   | -28.9646 | 3 _AQYK+14 chr1@1338     | 9.88E-11 | 0.00216  |
| 19July2011 | 5386  | 472.29  | -0.64754 | 2 _SPLFVPKI chrX@4402    | 1.30E-10 | 0.002623 |
| 19July2011 | 9461  | 504.78  | 6.126659 | 2 R.FPANFRC chr5@2004    | 2.67E-10 | 0.004378 |
| 19July2011 | 9484  | 504.78  | 6.126659 | 2 R.FPANFRC chr5@2004    | 4.01E-10 | 0.006397 |
| 19July2011 | 6807  | 924.41  | -11.8314 | 2 Q.KPDDISN Splice@chr   | 5.99E-11 | 0.001671 |
| 19July2011 | 3495  | 578.31  | 17.26868 | 3 K.FLK+14.0 chr5@7625   | 2.89E-10 | 0.004378 |
| 19July2011 | 5547  | 472.29  | -0.64754 | 2 _SPLFVPKI chrX@4402    | 1.30E-10 | 0.002623 |
| 19July2011 | 185   | 688.3   | 6.038794 | 2 R.GGDGGA chr3@2778     | 5.77E-18 | 0        |
| 19July2011 | 988   | 412.23  | 25.3069  | 2 R.IASYQGG chrX@1679    | 3.07E-11 | 5.90E-04 |
| 19July2011 | 2495  | 454.75  | 8.810814 | 2 K.TDLAYLG chr4@1545    | 1.05E-10 | 0.002406 |
| 19July2011 | 4435  | 451.95  | 16.69348 | 3 _KVPKNGY chr1@3337     | 3.68E-10 | 0.005731 |
| 19July2011 | 958   | 429.75  | -27.8303 | 2 K.KGGVAS/ chr5@3587    | 3.41E-10 | 0.005529 |
| 19July2011 | 5591  | 564.66  | 11.76712 | 3 K.PEIEISIKI Splice@chr | 4.79E-10 | 0.007691 |
| 19July2011 | 7018  | 555.63  | -25.3104 | 3 R.YFK+14.0 chr1@1628   | 1.97E-10 | 0.003291 |
| 19July2011 | 50    | 511.24  | 12.68013 | 3 R.GGDGGA chr3@2778     | 1.42E-13 | 0        |
| 19July2011 | 9480  | 472.29  | -0.64754 | 2 _SPLFVPKI chrX@4402    | 1.30E-10 | 0.002682 |
| 19July2011 | 11757 | 484.28  | 10.44055 | 3 K.ISSAIAMF chr4@7544   | 2.51E-10 | 0.005647 |
| 19July2011 | 586   | 511.24  | 12.68013 | 3 R.GGDGGA chr3@2778     | 9.40E-13 | 0        |
| 19July2011 | 2747  | 683.36  | -11.2703 | 2 E.EVCNFVN chrX@4262    | 2.52E-10 | 0.005647 |

|            |       |        |          |                          |          |          |
|------------|-------|--------|----------|--------------------------|----------|----------|
| 19July2011 | 563   | 529.28 | -17.5614 | 3 _._VK+14.01 chrX@1664  | 1.74E-10 | 0.003881 |
| 19July2011 | 12310 | 664.7  | 1.197202 | 3 _._PTLNK+1. chr1@6526  | 1.52E-10 | 0.003506 |
| 19July2011 | 16026 | 504.78 | 6.126659 | 2 R.FPANFRC chr5@2004    | 3.92E-10 | 0.008322 |
| 19July2011 | 7040  | 566.62 | -3.23729 | 3 _._NPSDPLT Splice@chr  | 4.57E-10 | 0.009765 |
| 19July2011 | 8850  | 703.87 | 11.02855 | 2 Y.VVQVAID chr1@1045    | 1.43E-15 | 0        |
| 19July2011 | 1075  | 688.3  | 6.038794 | 2 R.GGDGGA chr3@2778     | 2.57E-18 | 0        |
| 19July2011 | 16383 | 787.88 | 12.22608 | 2 K.FWREIQM chrX@1650    | 2.68E-10 | 0.005767 |
| 19July2011 | 1792  | 562.31 | -13.4391 | 2 R.FYLLYLYK Splice@chr  | 9.08E-11 | 0.00189  |
| 19July2011 | 1129  | 688.3  | 6.038794 | 2 R.GGDGGA chr3@2778     | 1.25E-18 | 0        |
| 19July2011 | 2967  | 587.3  | 4.892896 | 2 Q.NAVEQE Splice@chr    | 2.24E-12 | 0        |
| 19July2011 | 2347  | 451.27 | -16.5374 | 2 K.KTLVPTSF chr5@6236   | 3.59E-10 | 0.007737 |
| 19July2011 | 9646  | 472.29 | -0.64754 | 2 _._SPLFVPKF chrX@4402  | 3.81E-10 | 0.008322 |
| 19July2011 | 2911  | 587.3  | 4.892896 | 2 Q.NAVEQE Splice@chr    | 1.74E-11 | 6.76E-04 |
| 19July2011 | 645   | 511.24 | 12.68013 | 3 R.GGDGGA gi 3928945    | 2.57E-10 | 0.005647 |
| 19July2011 | 10353 | 671.37 | -24.0361 | 2 T.FNIVHTQ Splice@chr   | 2.41E-10 | 0.005647 |
| 19July2011 | 6196  | 883.4  | -6.70945 | 2 R.CAYHGKS chr5@1262    | 5.27E-11 | 0.00138  |
| 19July2011 | 3125  | 411.72 | 25.78417 | 2 K.IYGGGGG chr4@1715    | 2.34E-10 | 0.005422 |
| 19July2011 | 4010  | 469.58 | -0.34735 | 3 K.QALCSMI chrX@8031    | 5.06E-11 | 0.00138  |
| 19July2011 | 1191  | 688.3  | 6.038794 | 2 R.GGDGGA chr3@2778     | 9.98E-16 | 0        |
| 19July2011 | 9532  | 472.29 | -0.64754 | 2 _._SPLFVPKF chrX@4402  | 1.30E-10 | 0.002682 |
| 19July2011 | 10299 | 564.66 | 11.76712 | 3 K.PEIEISIKI chr1@3527  | 1.21E-12 | 0        |
| 19July2011 | 1237  | 512.26 | 1.074454 | 2 R.FSSGSSP chr4@3219    | 3.64E-12 | 1.98E-04 |
| 19July2011 | 16652 | 730.93 | -11.0855 | 2 _._FFHKVK+ chr5@2007   | 3.36E-10 | 0.007237 |
| 19July2011 | 6144  | 883.9  | -8.6104  | 2 R.CAYHGKS chr5@1262    | 3.86E-10 | 0.008322 |
| 19July2011 | 531   | 511.24 | 12.68013 | 3 R.GGDGGA chr3@2778     | 6.77E-16 | 0        |
| 19July2011 | 9589  | 472.29 | -0.64754 | 2 _._SPLFVPKF chrX@4402  | 1.30E-10 | 0.002682 |
| 19July2011 | 16417 | 787.89 | 24.95531 | 2 K.FWREIQM chrX@1650    | 3.42E-10 | 0.007484 |
| 19July2011 | 6380  | 588.29 | -10.2888 | 2 R.QIDKLEN chr5@2475    | 4.34E-11 | 0.001094 |
| 19July2011 | 8904  | 703.87 | 11.02855 | 2 Y.VVQVAID chr1@1045    | 2.91E-15 | 0        |
| 19July2011 | 758   | 531.28 | -24.71   | 2 R.VEISGKS chr2@3362    | 5.29E-11 | 0.00138  |
| 19July2011 | 4549  | 471.79 | -5.7044  | 2 K.IKVNFPPI chr2@3034   | 4.40E-10 | 0.009278 |
| 19July2011 | 16576 | 730.93 | -11.0855 | 2 _._FFHKVK+ chr5@2007   | 1.80E-10 | 0.003995 |
| 19July2011 | 8797  | 703.87 | 11.02855 | 2 Y.VVQVAID chr1@1045    | 2.30E-15 | 0        |
| 19July2011 | 7370  | 421.25 | 28.95162 | 3 _._EIVGMPA chr5@4046   | 3.18E-10 | 0.006482 |
| 19July2011 | 3026  | 587.3  | 4.892896 | 2 Q.NAVEQE Splice@chr    | 3.52E-11 | 9.59E-04 |
| 19July2011 | 2055  | 454.25 | 21.70768 | 2 R.RSMRNSI chr5@1004    | 3.35E-10 | 0.007237 |
| 19July2011 | 677   | 590.28 | -23.5115 | 2 K.IEKFYQQ chrX@8858    | 1.67E-10 | 0.00376  |
| 19July2011 | 5380  | 703.87 | 11.02855 | 2 Y.VVQVAID chr1@1045    | 7.73E-15 | 0        |
| 19July2011 | 222   | 688.3  | 6.038794 | 2 R.GGDGGA chr3@2778     | 7.31E-19 | 0        |
| 19July2011 | 171   | 530.78 | -21.5438 | 2 R.VEISGKS chr2@3362    | 2.01E-10 | 0.00384  |
| 19July2011 | 7577  | 484.28 | 10.44055 | 3 K.ISSAIAMF chr4@7544   | 1.71E-10 | 0.003504 |
| 19July2011 | 5040  | 451.95 | 16.69348 | 3 _._KVPKNGY chr1@3337   | 6.28E-11 | 0.001563 |
| 19July2011 | 2103  | 451.27 | 3.885917 | 3 R.VLYLLKFY Splice@chr  | 2.09E-10 | 0.004161 |
| 19July2011 | 7941  | 858.15 | 11.29842 | 3 _._LETGIKPI Splice@chr | 2.73E-11 | 0.001055 |
| 19July2011 | 10221 | 665.37 | -26.6417 | 2 Q.INNK+14 Splice@chr   | 1.99E-10 | 0.003658 |
| 19July2011 | 6256  | 472.29 | -0.64754 | 2 _._SPLFVPKF chrX@4402  | 3.83E-10 | 0.007124 |
| 19July2011 | 6312  | 472.29 | -0.64754 | 2 _._SPLFVPKF chrX@4402  | 2.82E-10 | 0.005327 |

|            |       |         |          |                           |          |          |
|------------|-------|---------|----------|---------------------------|----------|----------|
| 19July2011 | 3660  | 672.83  | 14.26368 | 2 R.QEM+15. chr3@1026     | 2.57E-10 | 0.004837 |
| 19July2011 | 11150 | 642.82  | -23.3936 | 2 I.SSILTSM+ chr4@1391    | 1.25E-10 | 0.002086 |
| 19July2011 | 3629  | 588.29  | -10.2888 | 2 R.QIDKLEN chr5@2475     | 7.63E-11 | 0.001563 |
| 19July2011 | 4376  | 535.29  | -3.94288 | 2 S.FAAVFGS chrX@3661     | 4.72E-10 | 0.009038 |
| 19July2011 | 71    | 766.35  | 4.705204 | 2 R.GGDGGA chr3@2778      | 1.56E-10 | 0.003335 |
| 19July2011 | 3420  | 883.39  | -18.0533 | 2 R.CAYHGKS chr5@1262     | 4.00E-10 | 0.00727  |
| 19July2011 | 5331  | 703.86  | -3.21304 | 2 Y.VVQVAID chr1@1045     | 1.03E-14 | 0        |
| 19July2011 | 3262  | 595.32  | -12.3237 | 2 K.ENLSLFEI Splice@chr   | 1.75E-10 | 0.003504 |
| 19July2011 | 8609  | 556.33  | 4.176577 | 2 R.RADSILLN chrX@5430    | 2.50E-10 | 0.004487 |
| 19July2011 | 6263  | 564.66  | 11.76712 | 3 K.PEIEISIKII Splice@chr | 2.34E-10 | 0.004487 |
| 19July2011 | 8543  | 762.4   | -28.9646 | 3 _AQYK+14 chr1@1338      | 4.57E-10 | 0.00856  |
| 19July2011 | 309   | 512.26  | 1.074454 | 2 R.FSSGSSP chr4@3219     | 5.41E-12 | 0        |
| 19July2011 | 8918  | 772.1   | -15.8306 | 3 I.KNEFNK+ chr5@1150     | 4.04E-10 | 0.007438 |
| 19July2011 | 1113  | 587.3   | 4.892896 | 2 Q.NAVEQE Splice@chr     | 4.08E-12 | 0        |
| 19July2011 | 9344  | 988.04  | 8.32247  | 2 K.FDYFNMI chr4@1602     | 3.10E-10 | 0.005658 |
| 19July2011 | 676   | 589.32  | -4.20346 | 2 R.ISSTGASE Splice@chr   | 1.91E-10 | 0.003658 |
| 19July2011 | 2911  | 693.87  | -6.6949  | 2 V.ICVAVGD chr5@1065     | 2.49E-10 | 0.004487 |
| 19July2011 | 11279 | 787.89  | 24.95531 | 2 K.FWREIQM chrX@1650     | 3.01E-10 | 0.005494 |
| 19July2011 | 5776  | 480.92  | -8.61027 | 3 K.LDFSSILN chr4@1495    | 4.67E-10 | 0.008883 |
| 19July2011 | 9474  | 902.46  | -21.5757 | 3 K.RKLEYTIS Splice@chr   | 2.25E-10 | 0.004339 |
| 19July2011 | 1055  | 587.3   | 4.892896 | 2 Q.NAVEQE Splice@chr     | 1.85E-11 | 7.61E-04 |
| 19July2011 | 5751  | 472.29  | -0.64754 | 2 _SPLFVPKf chrX@4402     | 1.30E-10 | 0.003161 |
| 19July2011 | 10316 | 504.78  | 6.126659 | 2 R.FPANFRC chr5@2004     | 6.74E-11 | 0.0024   |
| 19July2011 | 2712  | 454.75  | 8.810814 | 2 K.TDLAYLG chr4@1545     | 1.21E-10 | 0.002962 |
| 19July2011 | 1546  | 487.25  | -6.6109  | 3 K.MVQKDC Splice@chr     | 1.03E-10 | 0.002783 |
| 19July2011 | 8037  | 684.38  | -11.7894 | 4 _KIAKELGC chr2@7752     | 1.06E-10 | 0.002783 |
| 19July2011 | 10350 | 504.78  | 6.126659 | 2 R.FPANFRC chr5@2004     | 1.83E-10 | 0.004286 |
| 19July2011 | 2207  | 793.42  | 19.33353 | 2 R.NEKYSTV Splice@chr    | 3.25E-10 | 0.005822 |
| 19July2011 | 5991  | 564.66  | 11.76712 | 3 K.PEIEISIKII chr1@3527  | 1.75E-10 | 0.004098 |
| 19July2011 | 71    | 511.24  | 12.68013 | 3 R.GGDGGA chr3@2778      | 5.31E-15 | 0        |
| 19July2011 | 7832  | 515.63  | 4.709014 | 3 K.PNFTVILS chr4@1642    | 4.70E-10 | 0.00874  |
| 19July2011 | 9702  | 855.98  | -8.0346  | 2 K.IFTQTK+1 Splice@chr   | 2.69E-10 | 0.005694 |
| 19July2011 | 1059  | 429.75  | -27.8303 | 2 K.KGGVAS/ chr5@3587     | 2.33E-10 | 0.005621 |
| 19July2011 | 1115  | 412.23  | 25.3069  | 2 R.IASYQGG chrX@1679     | 4.64E-11 | 0.002071 |
| 19July2011 | 10562 | 767.75  | -14.8381 | 3 K.TFLKNPK chr3@1045     | 3.29E-10 | 0.005822 |
| 19July2011 | 8775  | 988.04  | 8.32247  | 2 K.FDYFNMI chr4@1602     | 2.07E-10 | 0.005277 |
| 19July2011 | 220   | 688.3   | 6.038794 | 2 R.GGDGGA chr3@2778      | 1.13E-18 | 0        |
| 19July2011 | 7365  | 1006.51 | -29.8034 | 2 _QKDFVFL chr4@1656      | 4.43E-10 | 0.007836 |
| 19July2011 | 3874  | 578.31  | 17.26868 | 3 K.FLK+14.0 chr5@7625    | 6.63E-11 | 0.0024   |
| 19July2011 | 6863  | 675.36  | -25.704  | 2 E.ELPELGFI chr1@1059    | 3.12E-10 | 0.005822 |
| 19July2011 | 6520  | 924.41  | -11.8314 | 2 Q.KPDDISN Splice@chr    | 2.72E-10 | 0.005694 |
| 19July2011 | 5880  | 564.66  | 11.76712 | 3 K.PEIEISIKII Splice@chr | 4.80E-12 | 2.59E-04 |
| 19July2011 | 416   | 409.72  | 19.71265 | 2 K.WGTTPTI chr2@8222     | 8.43E-11 | 0.0024   |
| 19July2011 | 295   | 702.38  | 2.001521 | 1 _DAAGLAC chr3@2528      | 1.02E-11 | 2.59E-04 |
| 19July2011 | 5259  | 652.36  | 17.5333  | 3 K.M+15.99 chr2@7425     | 4.28E-11 | 0.001851 |
| 19July2011 | 1004  | 587.3   | 4.892896 | 2 Q.NAVEQE Splice@chr     | 7.36E-12 | 6.51E-04 |
| 19July2011 | 5846  | 564.66  | 11.76712 | 3 K.PEIEISIKII chr1@3527  | 1.67E-10 | 0.00574  |

|            |       |        |          |                          |          |          |
|------------|-------|--------|----------|--------------------------|----------|----------|
| 19July2011 | 1062  | 412.23 | 25.3069  | 2 R.IASYQGG chrX@1679    | 1.71E-10 | 0.00574  |
| 19July2011 | 175   | 688.3  | 6.038794 | 2 R.GGDGGA chr3@2778     | 8.15E-19 | 0        |
| 19July2011 | 2151  | 793.42 | 19.33353 | 2 R.NEKYSTV Splice@chr   | 2.55E-10 | 0.007859 |
| 19July2011 | 42    | 511.24 | 12.68013 | 3 R.GGDGGA chr3@2778     | 3.23E-15 | 0        |
| 19July2011 | 2199  | 793.42 | 19.33353 | 2 R.NEKYSTV Splice@chr   | 2.36E-10 | 0.007214 |
| 19July2011 | 9972  | 504.78 | 6.126659 | 2 R.FPANFRC chr5@2004    | 2.35E-10 | 0.007214 |
| 19July2011 | 1619  | 433.76 | 2.609238 | 2 _..IVDLPGPI chr3@1104  | 7.57E-11 | 0.003093 |
| 19July2011 | 4739  | 452.73 | -24.0502 | 2 K.SVDLVDV chr5@8505    | 1.74E-10 | 0.00574  |
| 19July2011 | 10153 | 767.75 | -13.6701 | 3 R.KLSFKYN' chr4@2359   | 9.43E-11 | 0.003307 |
| 19July2011 | 7216  | 664.7  | 1.197202 | 3 _..PTLNK+1. chr1@6526  | 9.86E-12 | 6.51E-04 |
| 19July2011 | 7230  | 555.63 | -25.3104 | 3 R.YFK+14.0 chr1@1628   | 1.73E-10 | 0.00574  |
| 19July2011 | 5598  | 472.29 | -0.64754 | 2 _..SPLFVPKf chrX@4402  | 2.61E-10 | 0.008482 |
| 19July2011 | 766   | 688.3  | 6.038794 | 2 R.GGDGGA chr3@2778     | 4.61E-13 | 0        |
| 19July2011 | 2079  | 412.23 | 25.3069  | 2 R.IASYQGG chrX@1679    | 3.03E-11 | 6.36E-04 |
| 19July2011 | 4361  | 693.87 | -6.6949  | 2 V.ICVAVGD chr5@1065    | 4.86E-11 | 0.001661 |
| 19July2011 | 14514 | 787.89 | 24.95531 | 2 K.FWREIQN chrX@1650    | 2.81E-10 | 0.008493 |
| 19July2011 | 10719 | 685.88 | 4.188613 | 2 K.IVPGGGA chrX@1570    | 1.52E-15 | 0        |
| 19July2011 | 6311  | 556.83 | 14.93446 | 2 K.VIVVYAA: chr3@8274   | 4.28E-11 | 0.001264 |
| 19July2011 | 14487 | 787.89 | 24.95531 | 2 K.FWREIQN chrX@1650    | 3.09E-11 | 6.36E-04 |
| 19July2011 | 3376  | 489.3  | 10.01236 | 2 L.RTTTGISII chr5@1648  | 3.37E-10 | 0.009739 |
| 19July2011 | 10666 | 685.88 | 4.188613 | 2 K.IVPGGGA chrX@1570    | 5.01E-19 | 0        |
| 19July2011 | 7903  | 472.29 | -0.64754 | 2 _..SPLFVPKf chrX@4402  | 1.30E-10 | 0.003981 |
| 19July2011 | 1520  | 454.25 | 21.70768 | 2 R.RSMRNSI chr5@1004    | 2.46E-10 | 0.008023 |
| 19July2011 | 6852  | 509.8  | -23.773  | 2 R.SSVIMLIV chr2@5767   | 8.29E-11 | 0.003281 |
| 19July2011 | 9954  | 547.8  | 19.42296 | 2 R.WIDCFLL chr2@2424    | 1.68E-10 | 0.005927 |
| 19July2011 | 7365  | 501.8  | -2.49848 | 2 K.TTAQLLT' chrX@6798   | 1.69E-10 | 0.005927 |
| 19July2011 | 10470 | 484.28 | 10.44055 | 3 K.ISSAIAMf chr4@7544   | 3.89E-11 | 6.36E-04 |
| 19July2011 | 10414 | 484.28 | 10.44055 | 3 K.ISSAIAMf Splice@chr  | 1.52E-10 | 0.005237 |
| 19July2011 | 13679 | 672.34 | 16.60654 | 2 K.WELEVEL chrX@4091    | 3.13E-10 | 0.009085 |
| 19July2011 | 2190  | 412.23 | 25.3069  | 2 R.IASYQGG chrX@1679    | 1.80E-10 | 0.006796 |
| 19July2011 | 1363  | 562.31 | -13.4391 | 2 R.FYLLLYLK Splice@chr  | 6.80E-11 | 0.00281  |
| 19July2011 | 3523  | 471.79 | -5.7044  | 2 K.IKVNFPPI chr2@3034   | 3.37E-10 | 0.009739 |
| 19July2011 | 7855  | 472.29 | -0.64754 | 2 _..SPLFVPKf chrX@4402  | 1.30E-10 | 0.003981 |
| 19July2011 | 10217 | 563.27 | -13.5689 | 2 K.MSARNYI chrX@1045    | 6.30E-11 | 0.002639 |
| 19July2011 | 10845 | 858.48 | 6.006088 | 3 _..LETGIKPI Splice@chr | 5.28E-11 | 0.002255 |
| 19July2011 | 5825  | 588.29 | -10.2888 | 2 R.QIDKLEN chr5@2475    | 1.94E-11 | 0.001444 |
| 19July2011 | 11253 | 664.7  | 1.197202 | 3 _..PTLNK+1. chr1@6526  | 7.24E-12 | 7.68E-04 |
| 19July2011 | 10794 | 484.28 | 10.44055 | 3 K.ISSAIAMf chr4@7544   | 6.90E-11 | 0.003138 |
| 19July2011 | 11631 | 515.29 | -6.17134 | 3 K.PNFTVILS chr4@1642   | 3.04E-10 | 0.008351 |
| 19July2011 | 2771  | 735.33 | -27.5112 | 2 K.YGHANVI chr1@1065    | 1.12E-10 | 0.004796 |
| 19July2011 | 11127 | 685.88 | 4.188613 | 2 K.IVPGGGA chrX@1570    | 8.84E-16 | 0        |
| 19July2011 | 11202 | 664.7  | 1.197202 | 3 _..PTLNK+1. chr1@6526  | 2.43E-11 | 0.001605 |
| 19July2011 | 14987 | 730.93 | -11.0855 | 2 _..FFHKVK+ chr5@2007   | 3.86E-10 | 0.009948 |
| 19July2011 | 2697  | 587.3  | 4.892896 | 2 Q.NAVEQE' Splice@chr   | 5.72E-12 | 7.68E-04 |
| 19July2011 | 10235 | 547.8  | 19.42296 | 2 R.WIDCFLL chr2@2424    | 1.32E-10 | 0.004929 |
| 19July2011 | 12794 | 876.51 | -18.0997 | 2 K.NQAIQNI chr2@9182    | 6.77E-11 | 0.003138 |
| 19July2011 | 5089  | 423.56 | -8.1851  | 3 R.KSILMECI chr5@7134   | 1.73E-10 | 0.006127 |

|            |       |        |          |                           |          |          |
|------------|-------|--------|----------|---------------------------|----------|----------|
| 19July2011 | 11305 | 733.06 | 20.56636 | 3 K.TLM+15.! chrX@3225    | 1.36E-10 | 0.005098 |
| 19July2011 | 14550 | 504.78 | 6.126659 | 2 R.FPANFRC chr5@2004     | 3.29E-10 | 0.00883  |
| 19July2011 | 1945  | 454.25 | 21.70768 | 2 R.RSMRNSI chr5@1004     | 2.46E-10 | 0.00704  |
| 19July2011 | 10673 | 481.28 | 5.337578 | 2 R.VELLNAF Splice@chr    | 2.39E-10 | 0.00704  |
| 19July2011 | 10623 | 563.27 | -13.5689 | 2 K.MSARNYI chrX@1045     | 3.65E-10 | 0.009272 |
| 19July2011 | 13071 | 860.99 | -1.59656 | 2 _K+14.016 chr4@6178     | 1.89E-10 | 0.006465 |
| 19July2011 | 15011 | 730.93 | -11.0855 | 2 _FFHKVK+ chr5@2007      | 3.49E-11 | 0.001796 |
| 19July2011 | 1184  | 688.3  | 6.038794 | 2 R.GGDGGA chr3@2778      | 4.44E-14 | 0        |
| 19July2011 | 7516  | 509.8  | -23.773  | 2 R.SSVIMLIV chr2@5767    | 1.88E-11 | 0.001217 |
| 19July2011 | 1815  | 562.31 | -13.4391 | 2 R.FYLLYLYK Splice@chr   | 1.03E-10 | 0.004439 |
| 19July2011 | 10015 | 587.65 | -12.3172 | 3 R.RSANSTN chrX@1775     | 1.87E-10 | 0.006465 |
| 19July2011 | 7461  | 509.8  | -23.773  | 2 R.SSVIMLIV chr2@5767    | 4.56E-11 | 0.001994 |
| 19July2011 | 12993 | 987.54 | 10.02278 | 2 K.FDYFNMI chr4@1602     | 2.02E-10 | 0.006568 |
| 19July2011 | 7057  | 480.27 | -18.5931 | 2 K.IMVVGVI chr4@8732     | 1.05E-10 | 0.004439 |
| 19July2011 | 1995  | 454.25 | 21.70768 | 2 R.RSMRNSI chr5@1004     | 2.60E-10 | 0.007739 |
| 19July2011 | 11078 | 685.88 | 4.188613 | 2 K.IVPGGGA chrX@1570     | 1.00E-18 | 0        |
| 19July2011 | 6616  | 462.59 | 1.368923 | 3 K.RRYDYGK chr5@9435     | 6.44E-11 | 0.003138 |
| 19July2011 | 868   | 587.3  | 4.892896 | 2 Q.NAVEQE Splice@chr     | 1.34E-10 | 0.00426  |
| 19July2011 | 5095  | 931.78 | -28.5023 | 3 _VFGGK+1 chr5@3050      | 4.98E-10 | 0.008709 |
| 19July2011 | 8013  | 628.82 | 15.84692 | 2 K.EEDQSAI Splice@chr    | 4.09E-10 | 0.007631 |
| 19July2011 | 8587  | 876.51 | -18.0997 | 2 K.NQAIQNI chr2@9182     | 4.36E-10 | 0.007631 |
| 19July2011 | 1722  | 460.25 | 8.040761 | 2 _ATDGSSII chr5@1148     | 2.24E-11 | 0.001747 |
| 19July2011 | 2370  | 423.26 | 23.30279 | 2 K.LGAETVV chr2@6180     | 5.90E-10 | 0.009931 |
| 19July2011 | 8445  | 760.72 | 18.35362 | 3 R.RAINGTE Splice@chr    | 5.67E-10 | 0.009568 |
| 19July2011 | 7091  | 537.82 | -9.55065 | 2 K.LIGNNVF chr3@5865     | 1.13E-10 | 0.00331  |
| 19July2011 | 5846  | 472.29 | -0.64754 | 2 _SPLFVPKF chrX@4402     | 1.44E-10 | 0.00426  |
| 19July2011 | 7813  | 467.74 | 5.819355 | 2 K.NQLETAN Splice@chr    | 2.38E-10 | 0.005127 |
| 19July2011 | 239   | 408.56 | -23.8612 | 3 _KGALGFII Splice@chr    | 4.84E-11 | 0.002327 |
| 19July2011 | 6869  | 675.36 | -25.704  | 2 E.ELPELGFI chr1@1055    | 2.23E-10 | 0.005127 |
| 19July2011 | 2313  | 423.26 | 23.30279 | 2 K.LGAETVV chr2@6180     | 2.87E-10 | 0.005682 |
| 19July2011 | 7399  | 555.97 | 19.65028 | 3 K.M+15.99 chr5@1600     | 1.57E-11 | 0.001058 |
| 19July2011 | 7312  | 685.88 | 4.188613 | 2 K.IVPGGGA chrX@1570     | 3.30E-15 | 0        |
| 19July2011 | 2257  | 793.42 | 19.33353 | 2 R.NEKYSTV Splice@chr    | 1.72E-10 | 0.004421 |
| 19July2011 | 5904  | 472.29 | -0.64754 | 2 _SPLFVPKF chrX@4402     | 1.34E-10 | 0.00426  |
| 19July2011 | 7394  | 664.7  | 1.197202 | 3 _PTLNK+1 chr1@6526      | 6.14E-11 | 0.002327 |
| 19July2011 | 6056  | 671.37 | -24.0361 | 2 T.FNIVHTQ Splice@chr    | 4.98E-10 | 0.008709 |
| 19July2011 | 5393  | 550.82 | 20.90876 | 4 R.HSSGLKN chr5@1455     | 1.25E-11 | 0.001058 |
| 19July2011 | 7093  | 563.27 | -13.5689 | 2 K.MSARNYI chrX@1045     | 2.07E-10 | 0.005007 |
| 19July2011 | 5980  | 564.66 | 11.76712 | 3 K.PEIEISIKII Splice@chr | 1.95E-10 | 0.004613 |
| 19July2011 | 4219  | 556.83 | 14.93446 | 2 K.VIVVYAA chr3@8274     | 2.73E-10 | 0.005489 |
| 19July2011 | 10398 | 730.93 | -11.0855 | 2 _FFHKVK+ chr5@2007      | 3.62E-10 | 0.006958 |
| 19July2011 | 960   | 412.23 | 25.3069  | 2 R.IASYQGG chrX@1675     | 5.21E-11 | 0.002327 |
| 19July2011 | 60    | 511.24 | 12.68013 | 3 R.GGDGGA chr3@2778      | 1.51E-11 | 0.001058 |
| 19July2011 | 1867  | 589.8  | -8.81116 | 2 K.KVEMGQ Splice@chr     | 1.81E-10 | 0.004421 |
| 19July2011 | 2604  | 693.87 | -6.6949  | 2 V.ICVAVGD chr5@1063     | 9.16E-11 | 0.002457 |
| 19July2011 | 7119  | 555.97 | 19.65028 | 3 K.M+15.99 chr5@1600     | 4.02E-11 | 0.00105  |
| 19July2011 | 2951  | 558.31 | 15.55193 | 2 R.LEIDSSNI Splice@chr   | 2.98E-12 | 0        |

|            |       |        |          |                          |          |          |
|------------|-------|--------|----------|--------------------------|----------|----------|
| 19July2011 | 4649  | 481    | 7.348424 | 4 R.RRGSMC chrX@9772     | 2.46E-10 | 0.005645 |
| 19July2011 | 1032  | 544.79 | 1.908116 | 2 R.GTNVLVS Splice@chr   | 3.01E-11 | 8.09E-04 |
| 19July2011 | 3343  | 559.79 | 11.35993 | 2 R.DGWSIG chr4@4253     | 2.56E-10 | 0.005817 |
| 19July2011 | 1687  | 526.79 | 15.09121 | 2 K.KLDLNM chr2@7182     | 4.97E-11 | 0.00105  |
| 19July2011 | 4440  | 603.32 | -10.6063 | 3 K.LTKLNYI Splice@chr   | 1.17E-10 | 0.003115 |
| 19July2011 | 1959  | 471.79 | -5.7044  | 2 K.IKVNFPPI chr2@3034   | 4.08E-10 | 0.00933  |
| 19July2011 | 984   | 429.75 | -27.8303 | 2 K.KGGVAS chr5@3587     | 2.36E-10 | 0.005645 |
| 19July2011 | 44    | 511.24 | 12.68013 | 3 R.GGDGGA chr3@2778     | 1.17E-16 | 0        |
| 19July2011 | 8602  | 902.46 | -21.5757 | 3 K.RKLEYTIS Splice@chr  | 1.80E-10 | 0.005031 |
| 19July2011 | 960   | 587.3  | 4.892896 | 2 Q.NAVEQE Splice@chr    | 1.51E-11 | 5.51E-04 |
| 19July2011 | 908   | 587.3  | 4.892896 | 2 Q.NAVEQE Splice@chr    | 1.00E-11 | 5.51E-04 |
| 19July2011 | 10121 | 787.88 | 12.22608 | 2 K.FWREIQM chrX@1650    | 2.69E-12 | 0        |
| 19July2011 | 7473  | 515.3  | 13.29211 | 3 K.PNFTVILS chr4@1642   | 2.83E-10 | 0.006023 |
| 19July2011 | 164   | 688.3  | 6.038794 | 2 R.GGDGGA chr3@2778     | 6.81E-18 | 0        |
| 19July2011 | 5533  | 472.29 | -0.64754 | 2 _SPLFVPKI chrX@4402    | 3.73E-10 | 0.007867 |
| 19July2011 | 3588  | 573.3  | -19.1256 | 3 K.EMPFSV Splice@chr    | 1.79E-11 | 5.51E-04 |
| 19July2011 | 2570  | 503.26 | 11.60558 | 2 R.LADGTPF chr4@9405    | 1.49E-12 | 0        |
| 19July2011 | 10087 | 787.89 | 24.95531 | 2 K.FWREIQM chrX@1650    | 2.31E-10 | 0.005446 |
| 19July2011 | 1257  | 431.75 | 11.06792 | 2 _SSGGATL chr5@6795     | 2.06E-11 | 5.51E-04 |
| 19July2011 | 5370  | 472.29 | -0.64754 | 2 _SPLFVPKI chrX@4402    | 1.37E-10 | 0.006127 |
| 19July2011 | 844   | 587.3  | 4.892896 | 2 Q.NAVEQE Splice@chr    | 1.05E-11 | 6.46E-04 |
| 19July2011 | 7023  | 664.7  | 1.197202 | 3 _PTLNK+1 chr1@6526     | 1.49E-10 | 0.007096 |
| 19July2011 | 1028  | 474.27 | 23.04782 | 2 _VEARSTG chr5@1164     | 4.91E-11 | 0.003283 |
| 19July2011 | 931   | 545.29 | -1.17657 | 2 R.GTNVLVS Splice@chr   | 2.08E-10 | 0.008865 |
| 19July2011 | 209   | 580.81 | 18.10659 | 2 R.KVQESSP chr2@1131    | 1.50E-11 | 0.001222 |
| 19July2011 | 7707  | 571.64 | -12.8771 | 3 R.IAEKK+1 chr1@2921    | 7.91E-11 | 0.003743 |
| 19July2011 | 1294  | 439.23 | -12.3957 | 2 R.IDDKTSAI chr5@8738   | 5.48E-11 | 0.003283 |
| 19July2011 | 878   | 544.79 | 1.908116 | 2 R.GTNVLVS Splice@chr   | 3.07E-11 | 0.002327 |
| 19July2011 | 6511  | 705.61 | 10.33441 | 4 R.NEGRM+ chr4@3503     | 1.51E-10 | 0.007331 |
| 19July2011 | 68    | 511.23 | -6.85843 | 3 R.GGDGGA chr3@2778     | 2.23E-16 | 0        |
| 19July2011 | 1423  | 526.78 | -3.83085 | 2 K.KLDLNM chr2@7182     | 1.90E-10 | 0.008865 |
| 19July2011 | 188   | 688.3  | 6.038794 | 2 R.GGDGGA chr3@2778     | 6.96E-19 | 0        |
| 19July2011 | 2852  | 588.29 | -10.2888 | 2 R.QIDKLEN chr5@2475    | 4.87E-11 | 0.003283 |
| 19July2011 | 2903  | 588.29 | -10.2888 | 2 R.QIDKLEN chr5@2475    | 1.34E-11 | 9.50E-04 |
| 19July2011 | 5521  | 472.29 | -0.64754 | 2 _SPLFVPKI chrX@4402    | 2.98E-10 | 0.008242 |
| 19July2011 | 55    | 766.35 | 4.705204 | 2 R.GGDGGA chr3@2778     | 9.62E-11 | 0.004188 |
| 19July2011 | 5693  | 594.32 | -27.7061 | 3 K.NSPK+14 chrX@2992    | 1.26E-10 | 0.004948 |
| 19July2011 | 8654  | 902.46 | -21.5757 | 3 K.RKLEYTIS Splice@chr  | 5.50E-11 | 0.003599 |
| 19July2011 | 6819  | 994.84 | -20.7023 | 3 K.SQVFSTA chrX@6089    | 2.51E-14 | 0        |
| 19July2011 | 11149 | 432.88 | 10.04375 | 3 R.SETNSDK chr4@8262    | 1.10E-11 | 6.02E-04 |
| 19July2011 | 5687  | 564.66 | 11.76712 | 3 K.PEIEISIKI Splice@chr | 7.94E-11 | 0.004008 |
| 19July2011 | 239   | 512.26 | 1.074454 | 2 R.FSSGSSP chr4@3219    | 3.07E-12 | 6.02E-04 |
| 19July2011 | 842   | 587.3  | 4.892896 | 2 Q.NAVEQE Splice@chr    | 2.23E-11 | 0.001416 |
| 19July2011 | 4422  | 451.95 | 16.69348 | 3 _KVPKNGY chr1@3337     | 3.39E-10 | 0.009272 |
| 19July2011 | 6079  | 864.44 | 14.58468 | 4 R.LCK+14.0 chrX@9037   | 8.09E-11 | 0.004008 |
| 19July2011 | 156   | 522.8  | -6.43343 | 2 K.M+15.99 chr4@1097    | 1.13E-10 | 0.004834 |
| 19July2011 | 6515  | 675.36 | -25.704  | 2 E.ELPELGFI chr1@1059   | 3.46E-10 | 0.009471 |

|            |       |         |          |                         |          |          |
|------------|-------|---------|----------|-------------------------|----------|----------|
| 19July2011 | 932   | 412.23  | 25.3069  | 2 R.IASYQGG chrX@1679   | 3.11E-11 | 0.002416 |
| 19July2011 | 134   | 530.78  | -21.5438 | 2 R.VEISGKS/ chr2@3362  | 1.54E-10 | 0.004948 |
| 19July2011 | 7092  | 733.06  | -27.8862 | 3 _KYATFLYf chr1@1336   | 3.41E-10 | 0.009272 |
| 19July2011 | 8343  | 876.51  | -18.0997 | 2 K.NQAIQNI chr2@9182   | 4.19E-11 | 0.002919 |
| 19July2011 | 5052  | 550.82  | 20.90876 | 4 R.HSSGLKN chr5@1459   | 1.85E-10 | 0.00478  |
| 19July2011 | 4379  | 451.95  | 16.69348 | 3 _KVPKNGY chr1@3337    | 2.69E-10 | 0.006573 |
| 19July2011 | 2038  | 793.42  | 19.33353 | 2 R.NEKYSTV Splice@chr  | 1.85E-10 | 0.00478  |
| 19July2011 | 6676  | 1000.17 | -22.2213 | 3 K.SQVFSTA chrX@6089   | 1.46E-10 | 0.003724 |
| 19July2011 | 6762  | 772.91  | 11.59298 | 2 Q.FDGKSK\ chr5@8532   | 2.50E-10 | 0.006573 |
| 19July2011 | 10147 | 787.89  | 24.95531 | 2 K.FWREIQM chrX@1650   | 3.90E-10 | 0.00957  |
| 19July2011 | 230   | 512.26  | 1.074454 | 2 R.FSSGSSP( chr4@3219  | 1.15E-10 | 0.002842 |
| 19July2011 | 234   | 508.79  | -1.80299 | 2 K.SLVEKDV. Splice@chr | 4.81E-12 | 2.89E-04 |
| 19July2011 | 5440  | 472.29  | -0.64754 | 2 _SPLFVPKI chrX@4402   | 2.61E-10 | 0.006573 |
| 19July2011 | 149   | 522.8   | -6.43343 | 2 K.M+15.99 chr4@1097   | 9.27E-11 | 0.002408 |
| 19July2011 | 4551  | 452.73  | -24.0502 | 2 K.SVDLVDV chr5@8503   | 3.28E-10 | 0.008177 |
| 19July2011 | 6891  | 563.27  | -13.5689 | 2 K.MSARNYI chrX@1049   | 1.08E-10 | 0.002842 |
| 19July2011 | 6440  | 1128.05 | 6.854678 | 2 _IPSAVGY( Splice@chr  | 5.57E-11 | 0.00126  |
| 19July2011 | 952   | 429.75  | -27.8303 | 2 K.KGGVAS/ chr5@3587   | 2.39E-10 | 0.005992 |
| 19July2011 | 956   | 412.23  | 25.3069  | 2 R.IASYQGG chrX@1679   | 3.07E-11 | 7.76E-04 |
| 19July2011 | 8208  | 845.79  | 23.21674 | 3 R.GQCK+14 Splice@chr  | 2.68E-11 | 7.76E-04 |
| 19July2011 | 164   | 688.3   | 6.038794 | 2 R.GGDGGA chr3@2778    | 1.54E-18 | 0        |
| 19July2011 | 1013  | 584.3   | -7.53396 | 2 R.FSLKNTI chr4@2692   | 1.71E-10 | 0.004361 |
| 19July2011 | 5874  | 559.79  | 11.35993 | 2 R.DGWSIG( chr4@4253   | 3.85E-11 | 0.002473 |
| 19July2011 | 8682  | 515.62  | -18.8182 | 3 K.ILKIK+14. chr2@1449 | 2.01E-10 | 0.005658 |
| 19July2011 | 11743 | 845.79  | 23.21674 | 3 R.GQCK+14 Splice@chr  | 2.60E-11 | 0.002024 |
| 19July2011 | 9645  | 766.37  | 11.2133  | 2 K.SDGVVDV( chr3@5860  | 3.83E-11 | 0.002473 |
| 19July2011 | 2385  | 683.35  | -26.2975 | 2 R.KINFNNN chr2@1353   | 2.42E-10 | 0.007004 |
| 19July2011 | 3714  | 407.56  | 12.11053 | 3 _ALQCQTk chr3@9139    | 2.36E-10 | 0.006784 |
| 19July2011 | 1709  | 667.84  | 9.244617 | 2 R.RREDKSD chr4@1482   | 8.95E-11 | 0.003056 |
| 19July2011 | 5905  | 702.36  | 19.55301 | 2 R.LQENVEK chr4@7382   | 2.97E-10 | 0.009618 |
| 19July2011 | 11016 | 515.63  | 4.709014 | 3 K.PNFTVILS chr4@1642  | 2.11E-10 | 0.005658 |
| 19July2011 | 7042  | 509.8   | -23.773  | 2 R.SSVIMLIV chr2@5767  | 3.77E-11 | 0.002473 |
| 19July2011 | 6272  | 462.59  | 1.368923 | 3 K.RRYDYGk chr5@9439   | 5.26E-11 | 0.002714 |
| 19July2011 | 4608  | 454.75  | 8.810814 | 2 K.TDLAYLG chr4@1543   | 1.05E-10 | 0.003265 |
| 19July2011 | 10058 | 740.05  | -2.64277 | 3 K.LLSITNVF chr3@5507  | 1.18E-10 | 0.003462 |
| 19July2011 | 1659  | 455.22  | -4.10061 | 2 R.STNTSPS( chr4@8264  | 1.66E-11 | 0.001776 |
| 19July2011 | 6752  | 571.86  | -2.35222 | 2 T.KKGDIIV chr5@1238   | 2.16E-10 | 0.005887 |
| 19July2011 | 6736  | 735.06  | 10.34389 | 3 R.WQHALP chr4@7817    | 2.28E-10 | 0.00838  |
| 19July2011 | 1357  | 433.76  | 2.609238 | 2 _IVDLPGPI chr3@1104   | 1.28E-10 | 0.006163 |
| 19July2011 | 6496  | 555.97  | 19.65028 | 3 K.M+15.99 chr5@1600   | 6.86E-11 | 0.004151 |
| 19July2011 | 4874  | 515.62  | -18.8182 | 3 K.ILKIK+14. chr2@1449 | 6.74E-11 | 0.004151 |
| 19July2011 | 2177  | 454.75  | 8.810814 | 2 K.TDLAYLG chr4@1543   | 1.27E-10 | 0.005909 |
| 19July2011 | 362   | 667.83  | -5.76644 | 2 R.RREDKSD chr4@1482   | 2.03E-10 | 0.007798 |
| 1Mar2011-  | 18809 | 1096.89 | 6.757706 | 3 K.DKPFPSI Splice@chr  | 1.36E-10 | 0.00306  |
| 1Mar2011-  | 12447 | 888.47  | 22.8338  | 2 K.DITLEVEA Splice@chr | 5.36E-16 | 0        |
| 1Mar2011-  | 18569 | 860.69  | 14.08015 | 4 R.FQSAAIG Splice@chr  | 1.34E-14 | 0        |
| 1Mar2011-  | 8748  | 600.99  | -7.79911 | 3 K.QFLTLFT/ chr4@7690  | 1.02E-10 | 0.001817 |

|           |       |         |          |                         |          |          |
|-----------|-------|---------|----------|-------------------------|----------|----------|
| 1Mar2011- | 7170  | 599.32  | -23.327  | 2 R.FTGFELE chrX@1690   | 1.02E-10 | 0.001817 |
| 1Mar2011- | 14593 | 825.94  | -5.62306 | 2 _K+14.016 Splice@chr  | 3.77E-11 | 9.67E-04 |
| 1Mar2011- | 7117  | 688.03  | -17.0347 | 3 L.IFK+14.01 chr3@8836 | 1.72E-10 | 0.003614 |
| 1Mar2011- | 7109  | 1017.59 | -22.5744 | 1 R.SSVIMLIV chr2@5767  | 1.45E-10 | 0.003412 |
| 1Mar2011- | 11943 | 622.33  | 9.587405 | 2 R.AK+14.01 chr2@4270  | 7.96E-11 | 0.001691 |
| 1Mar2011- | 12502 | 888.47  | 22.8338  | 2 K.DITLEVEA Splice@chr | 2.75E-15 | 0        |
| 1Mar2011- | 19164 | 1175.12 | 6.371728 | 2 K.INWAVTI chr4@2890   | 4.16E-23 | 0        |
| 1Mar2011- | 19163 | 783.74  | -5.48579 | 3 K.INWAVTI chr4@2890   | 2.63E-17 | 0        |
| 1Mar2011- | 8949  | 661.4   | -2.4954  | 2 K.LVLIAVN1 chr1@6528  | 2.73E-10 | 0.005501 |
| 1Mar2011- | 13759 | 848.97  | 0.791766 | 2 R.LLELAPT chr2@6685   | 8.93E-17 | 0        |
| 1Mar2011- | 19417 | 1040.89 | -5.8694  | 3 E.LFQIIVM+ chr2@1065  | 5.66E-11 | 0.001347 |
| 1Mar2011- | 19434 | 1040.89 | -5.8694  | 3 E.LFQIIVM+ chr2@1065  | 3.71E-11 | 9.67E-04 |
| 1Mar2011- | 16434 | 581.56  | 1.710076 | 4 K.YLGAYLL/ Splice@chr | 7.61E-14 | 0        |
| 1Mar2011- | 12583 | 565.99  | -4.32119 | 3 R.LIRNSDKI Splice@chr | 9.15E-11 | 0.001691 |
| 1Mar2011- | 6007  | 975.55  | -13.0268 | 1 K.LPKLDAYI chr4@1145  | 4.58E-11 | 0.001216 |
| 1Mar2011- | 16769 | 973.46  | 16.48633 | 3 _GCSIVPIS Splice@chr  | 2.02E-11 | 7.03E-04 |
| 1Mar2011- | 7037  | 509.3   | -20.473  | 2 R.SSVIMLIV chr2@5767  | 8.71E-11 | 0.001691 |
| 1Mar2011- | 18867 | 828.38  | -20.1128 | 2 K.PNLK+14 chr2@3862   | 7.74E-11 | 0.001691 |
| 1Mar2011- | 3272  | 435.25  | -4.00582 | 2 K.KISAHGTI chr4@1727  | 4.56E-10 | 0.009514 |
| 1Mar2011- | 7090  | 509.3   | -20.473  | 2 R.SSVIMLIV chr2@5767  | 1.65E-10 | 0.003512 |
| 1Mar2011- | 12400 | 888.47  | 22.8338  | 2 K.DITLEVEA Splice@chr | 2.11E-15 | 0        |
| 1Mar2011- | 4188  | 533.82  | 16.26677 | 2 K.TNIYTILTI chr5@1325 | 3.98E-10 | 0.008148 |
| 1Mar2011- | 4396  | 533.82  | 16.26677 | 2 K.TNIYTILTI chr5@1325 | 2.99E-10 | 0.005838 |
| 1Mar2011- | 17014 | 999.48  | -14.3283 | 3 N.NFFEFSSI chr4@8813  | 3.73E-10 | 0.007703 |
| 1Mar2011- | 18841 | 770.43  | -18.4033 | 3 K.YLDAKCK chr4@3751   | 2.29E-10 | 0.00431  |
| 1Mar2011- | 18772 | 1014.23 | -23.9214 | 3 R.KLMSLAV chr5@1141   | 1.04E-12 | 0        |
| 1Mar2011- | 4916  | 1025.61 | -11.6755 | 1 K.LGLGSGL chr5@4945   | 1.93E-11 | 7.03E-04 |
| 1Mar2011- | 3454  | 628.86  | -16.3315 | 2 R.KSKK+14. chrX@1346  | 3.33E-10 | 0.006768 |
| 1Mar2011- | 8838  | 583.82  | -28.5596 | 2 R.LVFPITFS chr1@2422  | 3.37E-10 | 0.006885 |
| 1Mar2011- | 18578 | 688.75  | 8.895763 | 5 R.FQSAAIG Splice@chr  | 8.50E-11 | 0.001691 |
| 1Mar2011- | 12731 | 888.47  | 22.8338  | 2 K.DITLEVEA Splice@chr | 2.58E-12 | 1.50E-04 |
| 1Mar2011- | 19428 | 780.92  | -5.16507 | 4 E.LFQIIVM+ chr2@1065  | 4.50E-10 | 0.00929  |
| 1Mar2011- | 14194 | 1167.55 | -25.3067 | 2 L.K+14.016 Splice@chr | 3.31E-12 | 1.50E-04 |
| 1Mar2011- | 12653 | 888.47  | 22.8338  | 2 K.DITLEVEA Splice@chr | 1.38E-12 | 0        |
| 1Mar2011- | 4797  | 1025.61 | -11.6755 | 1 K.LGLGSGL chr5@4945   | 6.06E-12 | 1.50E-04 |
| 1Mar2011- | 13692 | 722.45  | -4.95112 | 2 R.RK+14.01 Splice@chr | 2.18E-10 | 0.004193 |
| 1Mar2011- | 15774 | 1097.22 | 2.692596 | 3 K.DKPFPSI Splice@chr  | 2.07E-10 | 0.00384  |
| 1Mar2011- | 9513  | 833.91  | -7.14778 | 2 _IDM+15.5 chrX@3237   | 4.76E-10 | 0.009853 |
| 1Mar2011- | 6986  | 509.3   | -20.473  | 2 R.SSVIMLIV chr2@5767  | 2.74E-10 | 0.005615 |
| 1Mar2011- | 12676 | 592.98  | 16.54196 | 3 K.DITLEVEA Splice@chr | 5.41E-12 | 1.50E-04 |
| 1Mar2011- | 3613  | 693.87  | -6.6949  | 2 V.ICVAVGD chr5@1063   | 2.89E-10 | 0.005722 |
| 1Mar2011- | 18893 | 828.38  | -20.1128 | 2 K.PNLK+14 chr2@3862   | 2.43E-10 | 0.004544 |
| 1Mar2011- | 17373 | 1008.5  | -22.758  | 2 E.CLVVNLS Splice@chr  | 4.34E-10 | 0.00895  |
| 1Mar2011- | 16394 | 581.57  | 18.95936 | 4 K.YLGAYLL/ Splice@chr | 2.11E-13 | 0        |
| 1Mar2011- | 14498 | 732.07  | 19.51873 | 3 R.ATDDWII Splice@chr  | 2.20E-10 | 0.004193 |
| 1Mar2011- | 15374 | 732.07  | 19.51873 | 3 R.ATDDWII Splice@chr  | 6.17E-11 | 0.001252 |
| 1Mar2011- | 17899 | 965.03  | -17.4108 | 2 F.FLRQIRQI chr4@3226  | 1.33E-10 | 0.002736 |

|           |       |         |          |                         |          |          |
|-----------|-------|---------|----------|-------------------------|----------|----------|
| 1Mar2011- | 15317 | 732.07  | 19.51873 | 3 R.ATDDWII Splice@chr  | 2.28E-10 | 0.004721 |
| 1Mar2011- | 19763 | 860.69  | 14.08015 | 4 R.FQSAAIG Splice@chr  | 4.22E-15 | 0        |
| 1Mar2011- | 2377  | 423.26  | 5.212441 | 2 R.IYAPRPK. chr5@1885  | 3.62E-10 | 0.008837 |
| 1Mar2011- | 20322 | 1175.13 | 14.90082 | 2 K.INWAVTI chr4@2890   | 3.28E-23 | 0        |
| 1Mar2011- | 16814 | 987.51  | 4.289691 | 3 K.KYLFLDNI chr4@1288  | 1.51E-10 | 0.002945 |
| 1Mar2011- | 19737 | 860.69  | 14.08015 | 4 R.FQSAAIG Splice@chr  | 1.50E-12 | 0        |
| 1Mar2011- | 13002 | 888.97  | 20.94366 | 2 K.DITLEVEA Splice@chr | 2.19E-15 | 0        |
| 1Mar2011- | 16227 | 987.51  | 4.289691 | 3 K.KYLFLDNI chr4@1288  | 7.50E-11 | 0.001598 |
| 1Mar2011- | 20612 | 1040.9  | 3.834672 | 3 E.LFQIIVM+ chr2@1065  | 1.07E-10 | 0.002409 |
| 1Mar2011- | 3977  | 435.25  | -4.00582 | 2 K.KISAHGTI chr4@1727  | 3.07E-10 | 0.007458 |
| 1Mar2011- | 3366  | 936.48  | 27.86052 | 1 K.LNGGYEC chr2@1191   | 3.99E-11 | 0.001145 |
| 1Mar2011- | 2415  | 423.26  | 5.212441 | 2 R.IYAPRPK. chr5@1885  | 4.20E-10 | 0.009439 |
| 1Mar2011- | 9417  | 661.4   | -2.4954  | 2 K.LVLIAVN1 chr1@6528  | 2.63E-10 | 0.005596 |
| 1Mar2011- | 19776 | 860.69  | 14.08015 | 4 R.FQSAAIG Splice@chr  | 2.37E-15 | 0        |
| 1Mar2011- | 20043 | 828.39  | -8.00743 | 2 K.PNLK+14 chr2@3862   | 4.11E-11 | 0.001145 |
| 1Mar2011- | 19758 | 1147.25 | 13.44098 | 3 R.FQSAAIG Splice@chr  | 8.87E-17 | 0        |
| 1Mar2011- | 19751 | 860.69  | 14.08015 | 4 R.FQSAAIG Splice@chr  | 2.33E-14 | 0        |
| 1Mar2011- | 19732 | 1147.25 | 13.44098 | 3 R.FQSAAIG Splice@chr  | 1.74E-17 | 0        |
| 1Mar2011- | 18118 | 634.84  | 6.410455 | 2 R.VDIGDILF Splice@chr | 9.02E-12 | 5.68E-04 |
| 1Mar2011- | 5458  | 455.25  | 8.8683   | 3 K.LEAKGGC chr5@1298   | 3.76E-10 | 0.00894  |
| 1Mar2011- | 13059 | 888.47  | 22.8338  | 2 K.DITLEVEA Splice@chr | 1.96E-14 | 0        |
| 1Mar2011- | 13122 | 888.97  | 20.94366 | 2 K.DITLEVEA Splice@chr | 9.22E-16 | 0        |
| 1Mar2011- | 12575 | 622.33  | 9.587405 | 2 R.AK+14.01 chr2@4270  | 1.30E-10 | 0.002736 |
| 1Mar2011- | 9875  | 1111.11 | -2.0893  | 2 R.LLM+15.5 chr4@3284  | 2.86E-10 | 0.006358 |
| 1Mar2011- | 17301 | 581.57  | 18.95936 | 4 K.YLGAYLL/ Splice@chr | 1.72E-13 | 0        |
| 1Mar2011- | 17129 | 1007.86 | 15.19559 | 3 R.CWNRRA Splice@chr   | 4.02E-12 | 2.99E-04 |
| 1Mar2011- | 14478 | 848.97  | 0.791766 | 2 R.LLELAPTC chr2@6685  | 1.44E-17 | 0        |
| 1Mar2011- | 11094 | 838.94  | -22.1914 | 2 R.QFADLPS chr5@1898   | 7.76E-11 | 0.001598 |
| 1Mar2011- | 16652 | 987.51  | 4.289691 | 3 K.KYLFLDNI chr4@1288  | 3.78E-10 | 0.009044 |
| 1Mar2011- | 16629 | 1096.89 | 6.757706 | 3 K.DKPFFPSI Splice@chr | 1.71E-10 | 0.003165 |
| 1Mar2011- | 19744 | 1147.25 | 13.44098 | 3 R.FQSAAIG Splice@chr  | 7.65E-17 | 0        |
| 1Mar2011- | 12626 | 622.33  | 9.587405 | 2 R.AK+14.01 chr2@4270  | 2.78E-10 | 0.006259 |
| 1Mar2011- | 20019 | 828.39  | -8.00743 | 2 K.PNLK+14 chr2@3862   | 4.36E-11 | 0.001145 |
| 1Mar2011- | 16601 | 1096.89 | 6.757706 | 3 K.DKPFFPSI Splice@chr | 1.83E-10 | 0.005711 |
| 1Mar2011- | 16579 | 1097.23 | 11.82664 | 3 K.DKPFFPSI Splice@chr | 1.93E-11 | 4.68E-04 |
| 1Mar2011- | 2370  | 564.32  | -22.6447 | 2 K.IFVLKHEN chr5@1811  | 1.51E-10 | 0.004816 |
| 1Mar2011- | 4317  | 1025.61 | -11.6755 | 1 K.LGLGSGI chr5@4945   | 4.69E-11 | 0.001329 |
| 1Mar2011- | 9793  | 838.94  | -22.1914 | 2 R.QFADLPS chr5@1898   | 2.63E-10 | 0.007069 |
| 1Mar2011- | 13800 | 825.94  | -5.62306 | 2 _K+14.016 Splice@chr  | 5.56E-11 | 0.001466 |
| 1Mar2011- | 17601 | 1040.89 | -5.8694  | 3 E.LFQIIVM+ chr2@1065  | 1.74E-10 | 0.005314 |
| 1Mar2011- | 17637 | 1040.89 | -5.8694  | 3 E.LFQIIVM+ chr2@1065  | 6.58E-11 | 0.001592 |
| 1Mar2011- | 13846 | 826.44  | -7.65642 | 2 _K+14.016 Splice@chr  | 6.00E-12 | 0        |
| 1Mar2011- | 15905 | 805.47  | -13.7324 | 2 K.TPIFIPAP! chr5@1861 | 8.02E-13 | 0        |
| 1Mar2011- | 15516 | 1162.13 | 17.06615 | 2 K.YLGAYLL/ Splice@chr | 1.02E-20 | 0        |
| 1Mar2011- | 15878 | 805.97  | -15.8175 | 2 K.TPIFIPAP! chr5@1861 | 3.25E-10 | 0.009485 |
| 1Mar2011- | 17615 | 1040.89 | -5.8694  | 3 E.LFQIIVM+ chr2@1065  | 3.07E-10 | 0.008983 |
| 1Mar2011- | 12998 | 848.97  | 0.791766 | 2 R.LLELAPTC chr2@6685  | 1.25E-16 | 0        |

|           |       |         |          |                         |          |          |
|-----------|-------|---------|----------|-------------------------|----------|----------|
| 1Mar2011- | 3962  | 534.32  | 13.11853 | 2 K.TNIYTILTI chr5@1329 | 3.54E-10 | 0.009837 |
| 1Mar2011- | 14534 | 987.5   | -5.85708 | 3 K.KYLFLDNI chr4@1288  | 1.63E-10 | 0.005213 |
| 1Mar2011- | 3907  | 534.32  | 13.11853 | 2 K.TNIYTILTI chr5@1329 | 2.38E-10 | 0.006957 |
| 1Mar2011- | 14501 | 665.37  | -26.6417 | 2 Q.INNK+14 Splice@chr  | 3.32E-10 | 0.009605 |
| 1Mar2011- | 17463 | 783.75  | 7.307848 | 3 K.INWAVTI chr4@2890   | 9.15E-16 | 0        |
| 1Mar2011- | 17462 | 1175.12 | 6.371728 | 2 K.INWAVTI chr4@2890   | 1.02E-24 | 0        |
| 1Mar2011- | 6263  | 509.3   | -20.473  | 2 R.SSVIMLIV chr2@5767  | 1.37E-10 | 0.004436 |
| 1Mar2011- | 9764  | 801.71  | 5.720343 | 3 K.FFKPNTD chr5@7527   | 1.00E-14 | 0        |
| 1Mar2011- | 2910  | 617.33  | 16.27136 | 1 R.NVGGGG Splice@chr   | 1.81E-10 | 0.005583 |
| 1Mar2011- | 10777 | 780.03  | -24.5321 | 3 ?.AQDNYM Splice@chr   | 8.78E-12 | 0        |
| 1Mar2011- | 16428 | 678.86  | -16.6575 | 2 K.QRSRPVLI chr5@8132  | 2.89E-10 | 0.008618 |
| 1Mar2011- | 17589 | 1040.9  | 3.834672 | 3 E.LFQIIVM+ chr2@1065  | 1.07E-10 | 0.002821 |
| 1Mar2011- | 2423  | 564.32  | -22.6447 | 2 K.IFVLKHEM chr5@1811  | 4.31E-11 | 0.001329 |
| 1Mar2011- | 15710 | 1162.12 | 8.441505 | 2 K.YLGAYLL Splice@chr  | 3.17E-13 | 0        |
| 1Mar2011- | 15737 | 1097.23 | 11.82664 | 3 K.DKPFPSI Splice@chr  | 1.19E-11 | 3.00E-04 |
| 1Mar2011- | 4679  | 533.82  | 16.26677 | 2 K.TNIYTILTI chr5@1329 | 3.39E-10 | 0.008824 |
| 1Mar2011- | 18189 | 860.69  | 14.08015 | 4 R.FQSAAIG Splice@chr  | 1.27E-15 | 0        |
| 1Mar2011- | 5025  | 534.32  | 13.11853 | 2 K.TNIYTILTI chr5@1329 | 2.35E-10 | 0.006097 |
| 1Mar2011- | 14172 | 946.96  | -27.9189 | 2 K.MWMNV Splice@chr    | 1.71E-10 | 0.004025 |
| 1Mar2011- | 10513 | 556.86  | -10.3839 | 2 R.QNKIVLIV Splice@chr | 2.16E-10 | 0.00549  |
| 1Mar2011- | 9023  | 583.82  | -28.5596 | 2 R.LVPITFS chr1@2422   | 2.50E-10 | 0.006329 |
| 1Mar2011- | 15735 | 987.5   | -5.85708 | 3 K.KYLFLDNI chr4@1288  | 7.33E-11 | 0.001243 |
| 1Mar2011- | 8883  | 661.4   | -2.4954  | 2 K.LVLIAVN1 chr1@6528  | 1.48E-10 | 0.003543 |
| 1Mar2011- | 10452 | 556.86  | -10.3839 | 2 R.QNKIVLIV Splice@chr | 1.81E-10 | 0.004392 |
| 1Mar2011- | 14691 | 825.94  | -5.62306 | 2 _.K+14.016 Splice@chr | 1.27E-11 | 3.00E-04 |
| 1Mar2011- | 12698 | 888.47  | 22.8338  | 2 K.DITLEVEA Splice@chr | 2.73E-12 | 1.56E-04 |
| 1Mar2011- | 12754 | 888.47  | 22.8338  | 2 K.DITLEVEA Splice@chr | 4.15E-13 | 0        |
| 1Mar2011- | 12584 | 888.47  | 22.8338  | 2 K.DITLEVEA Splice@chr | 2.16E-15 | 0        |
| 1Mar2011- | 14641 | 825.95  | 6.510915 | 2 _.K+14.016 Splice@chr | 1.34E-11 | 3.00E-04 |
| 1Mar2011- | 12532 | 888.47  | 22.8338  | 2 K.DITLEVEA Splice@chr | 2.71E-15 | 0        |
| 1Mar2011- | 16972 | 805.96  | -28.1843 | 2 K.TPIFIPAP1 chr5@1861 | 1.54E-10 | 0.003791 |
| 1Mar2011- | 11763 | 1169.54 | -25.4726 | 2 ?.AQDNYM Splice@chr   | 1.86E-14 | 0        |
| 1Mar2011- | 7466  | 509.8   | -23.773  | 2 R.SSVIMLIV chr2@5767  | 2.36E-10 | 0.006097 |
| 1Mar2011- | 11727 | 780.03  | -24.5321 | 3 ?.AQDNYM Splice@chr   | 3.64E-12 | 1.56E-04 |
| 1Mar2011- | 18213 | 860.69  | 14.08015 | 4 R.FQSAAIG Splice@chr  | 3.84E-14 | 0        |
| 1Mar2011- | 18795 | 1040.89 | -5.8694  | 3 E.LFQIIVM+ chr2@1065  | 1.61E-10 | 0.004025 |
| 1Mar2011- | 7485  | 1017.59 | -22.5744 | 1 R.SSVIMLIV chr2@5767  | 3.17E-10 | 0.007984 |
| 1Mar2011- | 3288  | 936.48  | 27.86052 | 1 K.LNGGYEC chr2@1191   | 4.09E-11 | 7.18E-04 |
| 1Mar2011- | 14208 | 1167.55 | -25.3067 | 2 L.K+14.016 Splice@chr | 9.61E-11 | 0.001889 |
| 1Mar2011- | 13799 | 848.97  | 0.791766 | 2 R.LLELAPTC chr2@6685  | 2.54E-16 | 0        |
| 1Mar2011- | 12643 | 888.97  | 20.94366 | 2 K.DITLEVEA Splice@chr | 1.40E-14 | 0        |
| 1Mar2011- | 15473 | 987.51  | 4.289691 | 3 K.KYLFLDNI chr4@1288  | 3.79E-10 | 0.009156 |
| 1Mar2011- | 12478 | 888.97  | 20.94366 | 2 K.DITLEVEA Splice@chr | 1.49E-15 | 0        |
| 1Mar2011- | 12905 | 1169.54 | -25.4726 | 2 ?.AQDNYM Splice@chr   | 1.52E-14 | 0        |
| 1Mar2011- | 5857  | 534.32  | 13.11853 | 2 K.TNIYTILTI chr5@1329 | 4.32E-10 | 0.008265 |
| 1Mar2011- | 20049 | 1147.25 | 13.44098 | 3 R.FQSAAIG Splice@chr  | 6.12E-17 | 0        |
| 1Mar2011- | 20092 | 860.69  | 14.08015 | 4 R.FQSAAIG Splice@chr  | 4.25E-15 | 0        |

|           |       |         |          |                         |          |          |
|-----------|-------|---------|----------|-------------------------|----------|----------|
| 1Mar2011- | 8821  | 897.42  | -27.6753 | 3 _QVREMH Splice@chr    | 1.55E-10 | 0.003499 |
| 1Mar2011- | 12750 | 664.36  | -7.23808 | 3 _PTLNK+1 chr1@6526    | 2.40E-11 | 4.08E-04 |
| 1Mar2011- | 9394  | 873.45  | 11.16623 | 2 S.IM+15.99 Splice@chr | 2.08E-10 | 0.004267 |
| 1Mar2011- | 15009 | 848.97  | 0.791766 | 2 R.LLELAPTC chr2@6685  | 8.60E-17 | 0        |
| 1Mar2011- | 9815  | 614.85  | 15.61097 | 2 _EVSILWA chr2@1409    | 1.73E-10 | 0.003963 |
| 1Mar2011- | 4086  | 439.91  | 17.33685 | 3 K.NSQKNPI chr2@3540   | 2.85E-10 | 0.006977 |
| 1Mar2011- | 3618  | 439.91  | -1.85417 | 3 K.VAGSGSL chr5@1747   | 3.71E-10 | 0.007989 |
| 1Mar2011- | 10214 | 671.37  | -24.0361 | 2 T.FNIVHTQ Splice@chr  | 2.42E-10 | 0.005287 |
| 1Mar2011- | 14951 | 848.97  | 0.791766 | 2 R.LLELAPTC chr2@6685  | 2.92E-18 | 0        |
| 1Mar2011- | 12805 | 664.7   | 1.197202 | 3 _PTLNK+1 chr1@6526    | 3.91E-12 | 1.48E-04 |
| 1Mar2011- | 17956 | 973.46  | 16.48633 | 3 _GCSIVPIS Splice@chr  | 1.21E-10 | 0.00246  |
| 1Mar2011- | 19421 | 1096.89 | 6.757706 | 3 K.DKPFFPSI Splice@chr | 2.30E-10 | 0.005065 |
| 1Mar2011- | 19729 | 929.15  | -28.8338 | 3 R.KSTAKLK' chr2@8593  | 4.64E-10 | 0.008765 |
| 1Mar2011- | 20079 | 688.75  | 8.895763 | 5 R.FQSAAIG Splice@chr  | 5.94E-12 | 1.48E-04 |
| 1Mar2011- | 20166 | 1147.23 | -4.02971 | 3 R.FQSAAIG Splice@chr  | 8.26E-15 | 0        |
| 1Mar2011- | 379   | 665.38  | -3.2154  | 2 R.QLQM+1 chr5@7160    | 2.29E-10 | 0.004956 |
| 1Mar2011- | 13906 | 888.47  | 22.8338  | 2 K.DITLEVEA Splice@chr | 1.04E-12 | 0        |
| 1Mar2011- | 13781 | 888.97  | 20.94366 | 2 K.DITLEVEA Splice@chr | 3.38E-15 | 0        |
| 1Mar2011- | 10329 | 671.37  | -24.0361 | 2 T.FNIVHTQ Splice@chr  | 1.67E-10 | 0.003614 |
| 1Mar2011- | 5801  | 534.32  | 13.11853 | 2 K.TNIYTILTI chr5@1329 | 5.04E-10 | 0.00906  |
| 1Mar2011- | 3602  | 438.26  | 15.00593 | 2 R.DPKPPPP chr1@1285   | 1.71E-10 | 0.003963 |
| 1Mar2011- | 3082  | 487.28  | -16.4424 | 2 K.LQTSNGL Splice@chr  | 3.10E-10 | 0.007383 |
| 1Mar2011- | 20063 | 1147.25 | 13.44098 | 3 R.FQSAAIG Splice@chr  | 1.08E-16 | 0        |
| 1Mar2011- | 5145  | 693.87  | -6.6949  | 2 V.ICVAVGD chr5@1063   | 1.62E-10 | 0.003499 |
| 1Mar2011- | 4241  | 564.32  | -22.6447 | 2 K.IFVLKHEM chr5@1811  | 2.01E-10 | 0.004267 |
| 1Mar2011- | 12273 | 854.96  | 28.93022 | 2 _KSFEVAIC Splice@chr  | 9.81E-15 | 0        |
| 1Mar2011- | 15753 | 732.07  | 19.51873 | 3 R.ATDDWII Splice@chr  | 5.09E-11 | 0.001026 |
| 1Mar2011- | 18117 | 934.48  | 16.93502 | 2 R.QFRQSGI chr5@4795   | 1.14E-10 | 0.002345 |
| 1Mar2011- | 14888 | 722.45  | -4.95112 | 2 R.RK+14.01 Splice@chr | 5.46E-10 | 0.009367 |
| 1Mar2011- | 1571  | 562.31  | -13.4391 | 2 R.FYLLLYLK Splice@chr | 5.35E-11 | 0.001026 |
| 1Mar2011- | 10265 | 671.37  | -24.0361 | 2 T.FNIVHTQ Splice@chr  | 2.27E-10 | 0.004842 |
| 1Mar2011- | 17693 | 581.57  | 18.95936 | 4 K.YLGAYLL' Splice@chr | 2.11E-10 | 0.004267 |
| 1Mar2011- | 9821  | 661.4   | -2.4954  | 2 K.LVLIAVN' chr1@6528  | 1.03E-10 | 0.002242 |
| 1Mar2011- | 18199 | 934.48  | 16.93502 | 2 R.QFRQSGI chr5@4795   | 8.24E-11 | 0.00177  |
| 1Mar2011- | 12698 | 664.37  | 7.851479 | 3 _PTLNK+1 chr1@6526    | 4.55E-10 | 0.008765 |
| 1Mar2011- | 13962 | 888.47  | 22.8338  | 2 K.DITLEVEA Splice@chr | 8.12E-13 | 0        |
| 1Mar2011- | 20111 | 860.69  | 14.08015 | 4 R.FQSAAIG Splice@chr  | 1.76E-14 | 0        |
| 1Mar2011- | 15970 | 825.94  | -5.62306 | 2 _K+14.016 Splice@chr  | 1.15E-11 | 2.78E-04 |
| 1Mar2011- | 11856 | 838.94  | -22.1914 | 2 R.QFADLPS chr5@1898   | 3.94E-11 | 9.27E-04 |
| 1Mar2011- | 12926 | 780.03  | -24.5321 | 3 ?.AQDNYM Splice@chr   | 4.15E-12 | 1.48E-04 |
| 1Mar2011- | 12874 | 780.03  | -24.5321 | 3 ?.AQDNYM Splice@chr   | 6.42E-11 | 0.001026 |
| 1Mar2011- | 15914 | 825.95  | 6.510915 | 2 _K+14.016 Splice@chr  | 4.00E-11 | 9.27E-04 |
| 1Mar2011- | 6088  | 1025.61 | -11.6755 | 1 K.LGLGSGL chr5@4945   | 3.73E-11 | 7.98E-04 |
| 1Mar2011- | 1664  | 473.76  | -14.1369 | 2 R.ILCASRAF chr5@2078  | 1.92E-10 | 0.004267 |
| 1Mar2011- | 5623  | 533.82  | 16.26677 | 2 K.TNIYTILTI chr5@1329 | 3.91E-10 | 0.008173 |
| 1Mar2011- | 6145  | 1025.61 | -11.6755 | 1 K.LGLGSGL chr5@4945   | 5.15E-11 | 0.001026 |
| 1Mar2011- | 13971 | 592.65  | 24.14055 | 3 K.DITLEVEA Splice@chr | 1.44E-10 | 0.002924 |

|           |       |         |          |                         |          |          |
|-----------|-------|---------|----------|-------------------------|----------|----------|
| 1Mar2011- | 17617 | 1097.23 | 11.82664 | 3 K.DKPFPSI Splice@chr  | 1.09E-10 | 0.002345 |
| 1Mar2011- | 17108 | 934.48  | 16.93502 | 2 R.QFRQSGI chr5@4795   | 1.47E-10 | 0.003609 |
| 1Mar2011- | 15048 | 826.45  | 4.477555 | 2 _K+14.016 Splice@chr  | 8.48E-11 | 0.001953 |
| 1Mar2011- | 311   | 544.29  | 17.07677 | 2 K.QNFIHET. chr1@5247  | 2.33E-10 | 0.005061 |
| 1Mar2011- | 19202 | 860.69  | 14.08015 | 4 R.FQSAAIG Splice@chr  | 3.03E-14 | 0        |
| 1Mar2011- | 17454 | 805.97  | -15.8175 | 2 K.TPIFIPAPi chr5@1861 | 6.28E-11 | 0.001318 |
| 1Mar2011- | 19241 | 1147.25 | 13.44098 | 3 R.FQSAAIG Splice@chr  | 6.56E-16 | 0        |
| 1Mar2011- | 3820  | 489.28  | 28.87637 | 2 R.RGTASRS chr5@1951   | 6.99E-12 | 4.29E-04 |
| 1Mar2011- | 6693  | 560.94  | -12.2507 | 3 _EMFSAA\ chr4@3415    | 2.06E-10 | 0.004846 |
| 1Mar2011- | 12891 | 888.47  | 22.8338  | 2 K.DITLEVEA Splice@chr | 1.36E-12 | 1.69E-04 |
| 1Mar2011- | 19221 | 1147.25 | 13.44098 | 3 R.FQSAAIG Splice@chr  | 2.30E-18 | 0        |
| 1Mar2011- | 11819 | 780.03  | -24.5321 | 3 ?.AQDNYM Splice@chr   | 4.74E-11 | 9.41E-04 |
| 1Mar2011- | 16863 | 581.57  | 18.95936 | 4 K.YLGAYLL/ Splice@chr | 1.39E-12 | 1.69E-04 |
| 1Mar2011- | 6800  | 800.49  | 2.290306 | 1 K.VEAAVAI Splice@chr  | 1.72E-10 | 0.003945 |
| 1Mar2011- | 16980 | 973.46  | 16.48633 | 3 _GCSIVPIS Splice@chr  | 1.27E-11 | 4.29E-04 |
| 1Mar2011- | 19284 | 1147.25 | 13.44098 | 3 R.FQSAAIG Splice@chr  | 1.73E-13 | 0        |
| 1Mar2011- | 15826 | 987.51  | 4.289691 | 3 K.KYLFLDNI chr4@1288  | 2.22E-11 | 4.29E-04 |
| 1Mar2011- | 5552  | 1025.62 | -1.90621 | 1 K.LGLGSGL chr5@4945   | 6.58E-12 | 4.29E-04 |
| 1Mar2011- | 19186 | 688.75  | 8.895763 | 5 R.FQSAAIG Splice@chr  | 2.66E-11 | 5.64E-04 |
| 1Mar2011- | 18877 | 929.16  | -18.1332 | 3 R.KSTAKLK' chr2@8595  | 8.54E-11 | 0.002082 |
| 1Mar2011- | 4979  | 533.82  | 16.26677 | 2 K.TNIYTILTI chr5@1325 | 9.18E-11 | 0.002194 |
| 1Mar2011- | 19286 | 860.68  | 2.433027 | 4 R.FQSAAIG Splice@chr  | 4.60E-13 | 0        |
| 1Mar2011- | 4555  | 693.87  | -6.6949  | 2 V.ICVAVGD chr5@1065   | 7.13E-11 | 0.001318 |
| 1Mar2011- | 5204  | 533.82  | 16.26677 | 2 K.TNIYTILTI chr5@1325 | 3.02E-10 | 0.007145 |
| 1Mar2011- | 11782 | 664.36  | -7.23808 | 3 _PTLNK+1. chr1@6526   | 2.74E-10 | 0.006469 |
| 1Mar2011- | 11760 | 780.03  | -24.5321 | 3 ?.AQDNYM Splice@chr   | 2.91E-11 | 6.91E-04 |
| 1Mar2011- | 11879 | 780.03  | -24.5321 | 3 ?.AQDNYM Splice@chr   | 9.98E-12 | 4.29E-04 |
| 1Mar2011- | 12716 | 888.47  | 22.8338  | 2 K.DITLEVEA Splice@chr | 3.36E-15 | 0        |
| 1Mar2011- | 12700 | 1056.56 | 28.0642  | 3 I.SRVEDDSi Splice@chr | 9.26E-15 | 0        |
| 1Mar2011- | 11707 | 780.03  | -24.5321 | 3 ?.AQDNYM Splice@chr   | 3.33E-11 | 6.91E-04 |
| 1Mar2011- | 14101 | 848.97  | 0.791766 | 2 R.LLELAPTC chr2@6685  | 1.51E-18 | 0        |
| 1Mar2011- | 20461 | 1092.55 | 22.03156 | 1 K.NLESKCM Splice@chr  | 3.86E-10 | 0.009611 |
| 1Mar2011- | 5492  | 1025.61 | -11.6755 | 1 K.LGLGSGL chr5@4945   | 6.74E-12 | 4.29E-04 |
| 1Mar2011- | 19209 | 688.75  | 8.895763 | 5 R.FQSAAIG Splice@chr  | 1.07E-11 | 4.29E-04 |
| 1Mar2011- | 6866  | 560.94  | -12.2507 | 3 _EMFSAA\ chr4@3415    | 6.36E-11 | 0.001318 |
| 1Mar2011- | 18103 | 968.13  | 18.26018 | 3 _GCSIVPIS Splice@chr  | 1.79E-11 | 4.29E-04 |
| 1Mar2011- | 4866  | 533.82  | 16.26677 | 2 K.TNIYTILTI chr5@1325 | 1.86E-10 | 0.004176 |
| 1Mar2011- | 11725 | 664.7   | 1.197202 | 3 _PTLNK+1. chr1@6526   | 9.21E-12 | 4.29E-04 |
| 1Mar2011- | 14983 | 732.07  | 19.51873 | 3 R.ATDDWII Splice@chr  | 1.19E-10 | 0.002926 |
| 1Mar2011- | 19259 | 1147.25 | 13.44098 | 3 R.FQSAAIG Splice@chr  | 1.94E-13 | 0        |
| 1Mar2011- | 19175 | 1147.24 | 4.705638 | 3 R.FQSAAIG Splice@chr  | 2.08E-15 | 0        |
| 1Mar2011- | 16941 | 999.48  | -14.3283 | 3 N.NFFEFSSI chr4@8815  | 2.58E-10 | 0.005983 |
| 1Mar2011- | 9970  | 556.85  | 26.98454 | 2 R.NKEPNLII chr2@8282  | 1.61E-10 | 0.004305 |
| 1Mar2011- | 4157  | 533.82  | 16.26677 | 2 K.TNIYTILTI chr5@1325 | 1.45E-10 | 0.003969 |
| 1Mar2011- | 9363  | 484.31  | 18.81723 | 2 K.ILIATTHA chr3@2125  | 1.78E-10 | 0.004522 |
| 1Mar2011- | 15674 | 1097.22 | 2.692596 | 3 K.DKPFPSI Splice@chr  | 1.11E-13 | 0        |
| 1Mar2011- | 15867 | 812.12  | 14.27915 | 3 A.EITEMLPi Splice@chr | 2.10E-13 | 0        |

|           |       |         |          |                         |          |          |
|-----------|-------|---------|----------|-------------------------|----------|----------|
| 1Mar2011- | 12494 | 592.65  | 24.14055 | 3 K.DITLEVEA Splice@chr | 3.00E-10 | 0.006658 |
| 1Mar2011- | 18655 | 1147.24 | 4.705638 | 3 R.FQSAAIG Splice@chr  | 9.01E-16 | 0        |
| 1Mar2011- | 8336  | 661.4   | -2.4954  | 2 K.LVLIAVN1 chr1@6528  | 2.29E-10 | 0.005657 |
| 1Mar2011- | 15384 | 987.5   | -5.85708 | 3 K.KYLFLDN1 chr4@1288  | 2.12E-10 | 0.004956 |
| 1Mar2011- | 12411 | 888.97  | 20.94366 | 2 K.DITLEVEA Splice@chr | 8.33E-13 | 0        |
| 1Mar2011- | 18658 | 860.69  | 14.08015 | 4 R.FQSAAIG Splice@chr  | 2.55E-14 | 0        |
| 1Mar2011- | 3874  | 696.37  | -15.3603 | 2 _LPTSPIGL chr5@1204   | 3.10E-10 | 0.007234 |
| 1Mar2011- | 3878  | 533.82  | 16.26677 | 2 K.TNIYTILTI chr5@1329 | 1.62E-10 | 0.004305 |
| 1Mar2011- | 13614 | 848.97  | 0.791766 | 2 R.LLELAPTC chr2@6685  | 7.03E-18 | 0        |
| 1Mar2011- | 11340 | 780.03  | -24.5321 | 3 ?.AQDNYM Splice@chr   | 3.22E-11 | 6.71E-04 |
| 1Mar2011- | 13557 | 848.97  | 0.791766 | 2 R.LLELAPTC chr2@6685  | 9.79E-19 | 0        |
| 1Mar2011- | 18669 | 1147.25 | 13.44098 | 3 R.FQSAAIG Splice@chr  | 3.93E-12 | 0        |
| 1Mar2011- | 18539 | 1097.22 | 2.692596 | 3 K.DKPFFPSI Splice@chr | 1.97E-10 | 0.004846 |
| 1Mar2011- | 17267 | 1161.63 | 18.51143 | 2 K.YLGAYLL/ Splice@chr | 5.91E-15 | 0        |
| 1Mar2011- | 18957 | 828.38  | -20.1128 | 2 K.PNLK+14 chr2@3862   | 3.73E-10 | 0.008821 |
| 1Mar2011- | 15907 | 812.11  | 2.033465 | 3 A.EITEMLP1 Splice@chr | 1.46E-13 | 0        |
| 1Mar2011- | 18979 | 828.38  | -20.1128 | 2 K.PNLK+14 chr2@3862   | 1.63E-10 | 0.004305 |
| 1Mar2011- | 16286 | 581.57  | 18.95936 | 4 K.YLGAYLL/ Splice@chr | 1.06E-12 | 0        |
| 1Mar2011- | 8782  | 671.37  | -24.0361 | 2 T.FNIVHTQ Splice@chr  | 6.56E-11 | 0.001562 |
| 1Mar2011- | 18638 | 1147.24 | 4.705638 | 3 R.FQSAAIG Splice@chr  | 9.58E-15 | 0        |
| 1Mar2011- | 6619  | 509.3   | -20.473  | 2 R.SSVIMLIV chr2@5767  | 1.72E-10 | 0.004411 |
| 1Mar2011- | 6562  | 509.3   | -20.473  | 2 R.SSVIMLIV chr2@5767  | 7.32E-11 | 0.001805 |
| 1Mar2011- | 6939  | 558.3   | -2.40945 | 3 R.EK+14.01 chr1@1077  | 1.16E-11 | 1.43E-04 |
| 1Mar2011- | 12461 | 888.47  | 22.8338  | 2 K.DITLEVEA Splice@chr | 9.79E-12 | 1.43E-04 |
| 1Mar2011- | 18640 | 860.68  | 2.433027 | 4 R.FQSAAIG Splice@chr  | 8.13E-16 | 0        |
| 1Mar2011- | 6995  | 558.3   | -2.40945 | 3 R.EK+14.01 chr1@1077  | 9.87E-11 | 0.002795 |
| 1Mar2011- | 4102  | 533.82  | 16.26677 | 2 K.TNIYTILTI chr5@1329 | 3.31E-10 | 0.007798 |
| 1Mar2011- | 19213 | 1175.12 | 6.371728 | 2 K.INWAVTI chr4@2890   | 1.94E-24 | 0        |
| 1Mar2011- | 2092  | 936.48  | 27.86052 | 1 K.LNGGYEC chr2@1191   | 1.23E-10 | 0.003626 |
| 1Mar2011- | 3432  | 693.87  | -6.6949  | 2 V.ICVAVGD chr5@1063   | 2.11E-10 | 0.004956 |
| 1Mar2011- | 10030 | 556.85  | -28.4079 | 2 R.QNKIVLIV Splice@chr | 3.64E-10 | 0.008471 |
| 1Mar2011- | 12269 | 888.47  | 22.8338  | 2 K.DITLEVEA Splice@chr | 1.20E-15 | 0        |
| 1Mar2011- | 4392  | 1025.61 | -11.6755 | 1 K.LGLGSGL chr5@4945   | 1.68E-11 | 4.23E-04 |
| 1Mar2011- | 10749 | 606.66  | -18.8783 | 3 I.NRFNISK chrX@1250   | 4.70E-11 | 0.001055 |
| 1Mar2011- | 16238 | 1097.22 | 2.692596 | 3 K.DKPFFPSI Splice@chr | 1.32E-10 | 0.003856 |
| 1Mar2011- | 15503 | 1064.2  | -10.2401 | 3 K.SGDAGIV Splice@chr  | 5.72E-11 | 0.001179 |
| 1Mar2011- | 8383  | 600.99  | -7.79911 | 3 K.QFLTFLT/ chr4@7690  | 2.01E-10 | 0.004846 |
| 1Mar2011- | 15626 | 1097.22 | 2.692596 | 3 K.DKPFFPSI Splice@chr | 6.57E-12 | 1.43E-04 |
| 1Mar2011- | 11387 | 1169.54 | -25.4726 | 2 ?.AQDNYM Splice@chr   | 1.81E-13 | 0        |
| 1Mar2011- | 3375  | 693.87  | -6.6949  | 2 V.ICVAVGD chr5@1063   | 5.95E-11 | 0.001433 |
| 1Mar2011- | 18622 | 1147.24 | 4.705638 | 3 R.FQSAAIG Splice@chr  | 3.80E-16 | 0        |
| 1Mar2011- | 11395 | 780.03  | -24.5321 | 3 ?.AQDNYM Splice@chr   | 9.65E-12 | 1.43E-04 |
| 1Mar2011- | 13500 | 722.45  | -4.95112 | 2 R.RK+14.01 Splice@chr | 3.92E-10 | 0.009505 |
| 1Mar2011- | 18888 | 1097.22 | 2.692596 | 3 K.DKPFFPSI Splice@chr | 1.02E-11 | 1.43E-04 |
| 1Mar2011- | 13857 | 888.47  | 22.8338  | 2 K.DITLEVEA Splice@chr | 4.76E-13 | 0        |
| 1Mar2011- | 20933 | 1040.89 | -5.8694  | 3 E.LFQIIVM1 chr2@1065  | 9.65E-11 | 0.00224  |
| 1Mar2011- | 8023  | 509.3   | -20.473  | 2 R.SSVIMLIV chr2@5767  | 3.16E-10 | 0.008517 |

|           |       |         |          |                         |          |          |
|-----------|-------|---------|----------|-------------------------|----------|----------|
| 1Mar2011- | 20526 | 828.39  | -8.00743 | 2 K.PNLK+14 chr2@3862   | 1.10E-10 | 0.002469 |
| 1Mar2011- | 17550 | 1007.86 | 15.19559 | 3 R.CWNRRA Splice@chr   | 9.81E-11 | 0.00224  |
| 1Mar2011- | 20508 | 828.39  | -8.00743 | 2 K.PNLK+14 chr2@3862   | 3.06E-10 | 0.007967 |
| 1Mar2011- | 13745 | 888.97  | 20.94366 | 2 K.DITLEVEA Splice@chr | 1.91E-13 | 0        |
| 1Mar2011- | 16089 | 825.94  | -5.62306 | 2 _K+14.016 Splice@chr  | 4.62E-11 | 0.001178 |
| 1Mar2011- | 3761  | 564.32  | -22.6447 | 2 K.IFVLKHEH chr5@1811  | 8.64E-11 | 0.002134 |
| 1Mar2011- | 20905 | 780.92  | -5.16507 | 4 E.LFQIIVM+ chr2@1065  | 1.54E-10 | 0.00374  |
| 1Mar2011- | 3705  | 564.32  | -22.6447 | 2 K.IFVLKHEH chr5@1811  | 5.37E-11 | 0.001415 |
| 1Mar2011- | 8580  | 443.24  | -17.2689 | 2 K.PVVIDDA chrX@5274   | 1.45E-10 | 0.00374  |
| 1Mar2011- | 9967  | 505.97  | -28.6631 | 3 _K+14.016 chrX@1507   | 2.43E-10 | 0.005965 |
| 1Mar2011- | 12718 | 780.03  | -24.5321 | 3 ?.AQDNYM Splice@chr   | 1.09E-11 | 5.63E-04 |
| 1Mar2011- | 20284 | 688.75  | 8.895763 | 5 R.FQSAAIG Splice@chr  | 8.14E-11 | 0.001763 |
| 1Mar2011- | 8078  | 509.3   | -20.473  | 2 R.SSVIMLIV chr2@5767  | 8.28E-11 | 0.001885 |
| 1Mar2011- | 15129 | 848.97  | 0.791766 | 2 R.LLELAPTC chr2@6685  | 1.16E-16 | 0        |
| 1Mar2011- | 15073 | 848.97  | 0.791766 | 2 R.LLELAPTC chr2@6685  | 4.31E-15 | 0        |
| 1Mar2011- | 6887  | 596.32  | 13.94377 | 2 K.M+15.99 chr2@1468   | 3.30E-10 | 0.009188 |
| 1Mar2011- | 5286  | 534.32  | 13.11853 | 2 K.TNIYTILTI chr5@1329 | 3.46E-10 | 0.009393 |
| 1Mar2011- | 16847 | 1063.86 | -15.3899 | 3 K.SGDAGIV Splice@chr  | 1.45E-10 | 0.00374  |
| 1Mar2011- | 13798 | 888.47  | 22.8338  | 2 K.DITLEVEA Splice@chr | 6.76E-12 | 5.63E-04 |
| 1Mar2011- | 5115  | 533.82  | 16.26677 | 2 K.TNIYTILTI chr5@1329 | 2.23E-10 | 0.005409 |
| 1Mar2011- | 20253 | 860.69  | 14.08015 | 4 R.FQSAAIG Splice@chr  | 6.10E-14 | 0        |
| 1Mar2011- | 8139  | 509.3   | -20.473  | 2 R.SSVIMLIV chr2@5767  | 1.87E-10 | 0.004997 |
| 1Mar2011- | 20269 | 688.75  | 8.895763 | 5 R.FQSAAIG Splice@chr  | 9.22E-12 | 5.63E-04 |
| 1Mar2011- | 17100 | 987.5   | -5.85708 | 3 K.KYLFLDNI chr4@1288  | 1.68E-10 | 0.004322 |
| 1Mar2011- | 16217 | 756.38  | -6.76239 | 3 _EM+15.9 chr4@6155    | 1.73E-10 | 0.004668 |
| 1Mar2011- | 4999  | 533.82  | 16.26677 | 2 K.TNIYTILTI chr5@1329 | 9.35E-11 | 0.00224  |
| 1Mar2011- | 3400  | 787.43  | -1.78505 | 1 K.SDAAPAK chrX@8018   | 1.36E-10 | 0.00374  |
| 1Mar2011- | 5708  | 1025.61 | -11.6755 | 1 K.LGLGSGL chr5@4945   | 4.49E-12 | 3.06E-04 |
| 1Mar2011- | 18766 | 962.47  | -24.1089 | 3 _LHLLDFV Splice@chr   | 1.75E-10 | 0.004784 |
| 1Mar2011- | 13773 | 622.33  | 9.587405 | 2 R.AK+14.01 chr2@4270  | 2.59E-10 | 0.006505 |
| 1Mar2011- | 4311  | 936.48  | 27.86052 | 1 K.LNGGYEC chr2@1191   | 2.89E-11 | 7.45E-04 |
| 1Mar2011- | 14463 | 888.47  | 22.8338  | 2 K.DITLEVEA Splice@chr | 3.80E-13 | 0        |
| 1Mar2011- | 11975 | 556.86  | -10.3839 | 2 R.QNKIVLIV Splice@chr | 8.61E-11 | 0.001982 |
| 1Mar2011- | 21756 | 1175.12 | 6.371728 | 2 K.INWAVTI chr4@2890   | 1.20E-24 | 0        |
| 1Mar2011- | 21106 | 688.75  | 8.895763 | 5 R.FQSAAIG Splice@chr  | 3.93E-10 | 0.008973 |
| 1Mar2011- | 17812 | 1096.89 | 6.757706 | 3 K.DKPFPSI Splice@chr  | 5.83E-11 | 0.001553 |
| 1Mar2011- | 22000 | 1040.89 | -5.8694  | 3 E.LFQIIVM+ chr2@1065  | 1.02E-11 | 5.33E-04 |
| 1Mar2011- | 1345  | 459.74  | 26.97556 | 2 _ERQNGG chr1@1431     | 5.03E-11 | 0.001202 |
| 1Mar2011- | 21779 | 1175.13 | 14.90082 | 2 K.INWAVTI chr4@2890   | 9.56E-17 | 0        |
| 1Mar2011- | 21437 | 770.43  | -18.4033 | 3 K.YLDAKCK chr4@3751   | 4.03E-10 | 0.00928  |
| 1Mar2011- | 15623 | 848.97  | 0.791766 | 2 R.LLELAPTC chr2@6685  | 1.46E-19 | 0        |
| 1Mar2011- | 21095 | 1147.25 | 13.44098 | 3 R.FQSAAIG Splice@chr  | 1.38E-15 | 0        |
| 1Mar2011- | 21133 | 1147.25 | 13.44098 | 3 R.FQSAAIG Splice@chr  | 3.36E-17 | 0        |
| 1Mar2011- | 12107 | 1106.03 | -18.2067 | 2 K.FQMGHE chr4@1995    | 2.16E-10 | 0.004928 |
| 1Mar2011- | 12347 | 838.94  | -22.1914 | 2 R.QFADLPS chr5@1898   | 4.12E-10 | 0.00969  |
| 1Mar2011- | 14404 | 888.47  | 22.8338  | 2 K.DITLEVEA Splice@chr | 9.59E-14 | 0        |
| 1Mar2011- | 10765 | 671.37  | -24.0361 | 2 T.FNIVHTQ Splice@chr  | 2.65E-10 | 0.006608 |

|           |       |         |          |                         |          |          |
|-----------|-------|---------|----------|-------------------------|----------|----------|
| 1Mar2011- | 15495 | 722.45  | -4.95112 | 2 R.RK+14.01 Splice@chr | 3.53E-10 | 0.007974 |
| 1Mar2011- | 21488 | 828.39  | -8.00743 | 2 K.PNLK+14 chr2@3862   | 7.61E-11 | 0.001872 |
| 1Mar2011- | 14230 | 888.47  | 22.8338  | 2 K.DITLEVEA Splice@chr | 3.00E-15 | 0        |
| 1Mar2011- | 5802  | 533.82  | 16.26677 | 2 K.TNIYTILTI chr5@1329 | 2.55E-10 | 0.006301 |
| 1Mar2011- | 20497 | 1096.89 | 6.757706 | 3 K.DKPFFPSI Splice@chr | 8.93E-13 | 0        |
| 1Mar2011- | 10657 | 671.37  | -24.0361 | 2 T.FNIVHTQ Splice@chr  | 2.19E-10 | 0.004928 |
| 1Mar2011- | 15685 | 848.97  | 0.791766 | 2 R.LLELAPT chr2@6685   | 2.82E-18 | 0        |
| 1Mar2011- | 6430  | 1025.62 | -1.90621 | 1 K.LGLGSGI chr5@4945   | 4.72E-12 | 2.70E-04 |
| 1Mar2011- | 19356 | 805.47  | -13.7324 | 2 K.TPIFIPAP chr5@1861  | 4.07E-10 | 0.009594 |
| 1Mar2011- | 20376 | 1096.89 | 6.757706 | 3 K.DKPFFPSI Splice@chr | 1.68E-10 | 0.004227 |
| 1Mar2011- | 18852 | 956.54  | 23.72556 | 1 K.ISLVFDVY chrX@7831  | 1.35E-10 | 0.003726 |
| 1Mar2011- | 21144 | 688.75  | 8.895763 | 5 R.FQSAAIG Splice@chr  | 1.12E-10 | 0.002969 |
| 1Mar2011- | 1561  | 562.31  | -13.4391 | 2 R.FYLLYLYK Splice@chr | 4.73E-11 | 0.001202 |
| 1Mar2011- | 2527  | 832.44  | 5.073997 | 1 K.NTVGAGI chr4@3368   | 1.05E-10 | 0.002874 |
| 1Mar2011- | 14631 | 825.94  | -5.62306 | 2 _K+14.016 Splice@chr  | 3.89E-11 | 0.001089 |
| 1Mar2011- | 6375  | 1025.61 | -11.6755 | 1 K.LGLGSGI chr5@4945   | 5.34E-11 | 0.001319 |
| 1Mar2011- | 4198  | 439.91  | 17.33685 | 3 K.NSQKNPI chr2@3540   | 1.66E-10 | 0.004227 |
| 1Mar2011- | 9185  | 443.24  | -17.2689 | 2 K.PVVIDDA chrX@5274   | 3.17E-10 | 0.007573 |
| 1Mar2011- | 1515  | 562.31  | -13.4391 | 2 R.FYLLYLYK Splice@chr | 6.50E-11 | 0.001872 |
| 1Mar2011- | 21469 | 828.39  | -8.00743 | 2 K.PNLK+14 chr2@3862   | 1.75E-11 | 6.39E-04 |
| 1Mar2011- | 1464  | 915.47  | 1.201399 | 1 K.FHEIGGQ chrX@4727   | 1.38E-10 | 0.003726 |
| 1Mar2011- | 6490  | 1025.61 | -11.6755 | 1 K.LGLGSGI chr5@4945   | 3.13E-11 | 7.45E-04 |
| 1Mar2011- | 14347 | 888.47  | 22.8338  | 2 K.DITLEVEA Splice@chr | 1.41E-14 | 0        |
| 1Mar2011- | 21114 | 1147.25 | 13.44098 | 3 R.FQSAAIG Splice@chr  | 3.14E-15 | 0        |
| 1Mar2011- | 21152 | 860.69  | 14.08015 | 4 R.FQSAAIG Splice@chr  | 5.99E-14 | 0        |
| 1Mar2011- | 21297 | 1070.59 | 21.26795 | 2 R.KSTENMI chr1@1074   | 2.23E-10 | 0.005033 |
| 1Mar2011- | 14523 | 888.47  | 22.8338  | 2 K.DITLEVEA Splice@chr | 2.00E-12 | 2.70E-04 |
| 1Mar2011- | 485   | 665.39  | 11.85105 | 2 R.QLQM+1 chr5@7160    | 1.31E-10 | 0.003518 |
| 1Mar2011- | 4260  | 936.48  | 27.86052 | 1 K.LNGGYEC chr2@1191   | 4.07E-11 | 0.001089 |
| 1Mar2011- | 15290 | 892     | -11.0288 | 2 L.EEAVVVE chr4@5938   | 1.34E-10 | 0.003726 |
| 1Mar2011- | 16658 | 825.94  | -5.62306 | 2 _K+14.016 Splice@chr  | 1.65E-11 | 6.39E-04 |
| 1Mar2011- | 14287 | 888.47  | 22.8338  | 2 K.DITLEVEA Splice@chr | 2.53E-15 | 0        |
| 1Mar2011- | 21759 | 783.75  | 7.307848 | 3 K.INWAVTI chr4@2890   | 4.63E-17 | 0        |
| 1Mar2011- | 16431 | 732.07  | 19.51873 | 3 R.ATDDWII Splice@chr  | 2.96E-10 | 0.007414 |
| 1Mar2011- | 16489 | 732.07  | 19.51873 | 3 R.ATDDWII Splice@chr  | 8.33E-11 | 0.001982 |
| 1Mar2011- | 1390  | 459.74  | 26.97556 | 2 _ERQNGGI chr1@1431    | 4.51E-11 | 0.001089 |
| 1Mar2011- | 18127 | 581.57  | 18.95936 | 4 K.YLGAYLL Splice@chr  | 1.04E-11 | 8.04E-04 |
| 1Mar2011- | 4045  | 553.33  | -3.70337 | 2 K.PQAKPNI chr5@9002   | 1.60E-10 | 0.004778 |
| 1Mar2011- | 4756  | 533.82  | 16.26677 | 2 K.TNIYTILTI chr5@1329 | 2.15E-10 | 0.005722 |
| 1Mar2011- | 18169 | 956.54  | 23.72556 | 1 K.ISLVFDVY chrX@7831  | 2.02E-10 | 0.00562  |
| 1Mar2011- | 20609 | 860.69  | 14.08015 | 4 R.FQSAAIG Splice@chr  | 2.29E-15 | 0        |
| 1Mar2011- | 18602 | 965.03  | -17.4108 | 2 F.FLRQIRQI chr4@3226  | 1.32E-11 | 8.04E-04 |
| 1Mar2011- | 13407 | 888.47  | 22.8338  | 2 K.DITLEVEA Splice@chr | 9.57E-16 | 0        |
| 1Mar2011- | 6919  | 560.94  | -12.2507 | 3 _EMFSAAI chr4@3419    | 4.23E-11 | 0.001772 |
| 1Mar2011- | 1365  | 409.22  | -18.6349 | 2 R.AGGGTAI chr2@7665   | 2.74E-10 | 0.007458 |
| 1Mar2011- | 18777 | 805.47  | -13.7324 | 2 K.TPIFIPAP chr5@1861  | 1.58E-10 | 0.004778 |
| 1Mar2011- | 13710 | 1056.88 | 14.36045 | 3 I.SRVEDDS Splice@chr  | 2.74E-11 | 0.001167 |

|           |       |         |          |                          |          |          |
|-----------|-------|---------|----------|--------------------------|----------|----------|
| 1Mar2011- | 20858 | 828.39  | -8.00743 | 2 K.PNLK+14 chr2@3862    | 1.39E-10 | 0.004704 |
| 1Mar2011- | 12888 | 622.33  | 9.587405 | 2 R.AK+14.01 chr2@4270   | 1.18E-10 | 0.004155 |
| 1Mar2011- | 17108 | 987.51  | 4.289691 | 3 K.KYLFLDNI chr4@1288   | 3.20E-10 | 0.008727 |
| 1Mar2011- | 11133 | 572.29  | -17.3076 | 3 K.KASFEIVM chrX@1609   | 1.86E-10 | 0.005303 |
| 1Mar2011- | 3345  | 936.48  | 27.86052 | 1 K.LNGGYEC chr2@1191    | 4.40E-11 | 0.001772 |
| 1Mar2011- | 14901 | 722.45  | -4.95112 | 2 R.RK+14.01 Splice@chr  | 3.58E-10 | 0.009558 |
| 1Mar2011- | 21153 | 783.42  | 13.00166 | 3 K.INWAVTI chr4@2890    | 3.75E-13 | 0        |
| 1Mar2011- | 21155 | 1174.63 | 16.33009 | 2 K.INWAVTI chr4@2890    | 2.80E-15 | 0        |
| 1Mar2011- | 13355 | 888.47  | 22.8338  | 2 K.DITLEVEA Splice@chr  | 8.66E-16 | 0        |
| 1Mar2011- | 7430  | 1137.65 | -15.1425 | 1 Q.FLVISFA\ chrX@1232   | 3.24E-10 | 0.008831 |
| 1Mar2011- | 19878 | 1096.89 | 6.757706 | 3 K.DKPFFPSI Splice@chr  | 1.80E-11 | 8.04E-04 |
| 1Mar2011- | 13304 | 888.97  | 20.94366 | 2 K.DITLEVEA Splice@chr  | 1.34E-15 | 0        |
| 1Mar2011- | 20567 | 860.69  | 14.08015 | 4 R.FQSAAIG Splice@chr   | 3.53E-14 | 0        |
| 1Mar2011- | 4085  | 553.33  | -3.70337 | 2 K.PQAKPNI chr5@9002    | 1.84E-10 | 0.005202 |
| 1Mar2011- | 14960 | 848.97  | 0.791766 | 2 R.LLELAPTC chr2@6685   | 2.23E-17 | 0        |
| 1Mar2011- | 480   | 743.48  | 2.794988 | 1 K.KIGGAGII chr1@2883   | 1.73E-10 | 0.005092 |
| 1Mar2011- | 21133 | 1175.12 | 6.371728 | 2 K.INWAVTI chr4@2890    | 1.46E-25 | 0        |
| 1Mar2011- | 21134 | 783.75  | 7.307848 | 3 K.INWAVTI chr4@2890    | 6.71E-19 | 0        |
| 1Mar2011- | 16004 | 732.07  | 19.51873 | 3 R.ATDDWII Splice@chr   | 2.43E-10 | 0.00625  |
| 1Mar2011- | 15011 | 848.97  | 0.791766 | 2 R.LLELAPTC chr2@6685   | 6.77E-18 | 0        |
| 1Mar2011- | 18730 | 805.97  | -15.8175 | 2 K.TPIFIPAP\ chr5@1861  | 3.05E-10 | 0.008315 |
| 1Mar2011- | 8326  | 886     | 3.172487 | 2 F.ENVVVEVII Splice@chr | 8.58E-13 | 0        |
| 1Mar2011- | 5583  | 1025.62 | -1.90621 | 1 K.LGLGSGL chr5@4945    | 2.31E-12 | 3.10E-04 |
| 1Mar2011- | 13622 | 888.97  | 20.94366 | 2 K.DITLEVEA Splice@chr  | 4.36E-13 | 0        |
| 1Mar2011- | 15312 | 1167.55 | -25.3067 | 2 L.K+14.016 Splice@chr  | 3.65E-14 | 0        |
| 1Mar2011- | 3024  | 533.82  | 16.26677 | 2 K.TNIYTILTI chr5@1329  | 1.23E-10 | 0.003688 |
| 1Mar2011- | 14348 | 1147.25 | 13.44098 | 3 R.FQSAAIG Splice@chr   | 2.10E-16 | 0        |
| 1Mar2011- | 3565  | 1025.61 | -11.6755 | 1 K.LGLGSGL chr5@4945    | 9.23E-11 | 0.00322  |
| 1Mar2011- | 9833  | 888.47  | 22.8338  | 2 K.DITLEVEA Splice@chr  | 1.13E-14 | 0        |
| 1Mar2011- | 14359 | 1147.25 | 13.44098 | 3 R.FQSAAIG Splice@chr   | 2.80E-17 | 0        |
| 1Mar2011- | 12514 | 1097.22 | 2.692596 | 3 K.DKPFFPSI Splice@chr  | 1.80E-10 | 0.005619 |
| 1Mar2011- | 14004 | 1096.89 | 6.757706 | 3 K.DKPFFPSI Splice@chr  | 2.50E-10 | 0.006699 |
| 1Mar2011- | 11016 | 848.97  | 0.791766 | 2 R.LLELAPTC chr2@6685   | 1.81E-16 | 0        |
| 1Mar2011- | 5275  | 509.3   | -20.473  | 2 R.SSVIMLIV chr2@5767   | 1.32E-10 | 0.003852 |
| 1Mar2011- | 4622  | 560.6   | -22.2499 | 3 _EMFSAA\ chr4@3419     | 2.32E-10 | 0.006223 |
| 1Mar2011- | 11338 | 946.46  | -26.1447 | 2 K.MWMNV Splice@chr     | 1.01E-10 | 0.00338  |
| 1Mar2011- | 12483 | 987.5   | -5.85708 | 3 K.KYLFLDNI chr4@1288   | 2.94E-10 | 0.008475 |
| 1Mar2011- | 11684 | 826.44  | -7.65642 | 2 _K+14.016 Splice@chr   | 3.78E-11 | 0.001868 |
| 1Mar2011- | 7910  | 556.85  | 26.98454 | 2 R.NKEPNLII chr2@8282   | 2.91E-10 | 0.008475 |
| 1Mar2011- | 9141  | 780.03  | -24.5321 | 3 ?.AQDNYM Splice@chr    | 1.82E-12 | 2.14E-04 |
| 1Mar2011- | 10056 | 888.47  | 22.8338  | 2 K.DITLEVEA Splice@chr  | 3.59E-13 | 0        |
| 1Mar2011- | 5287  | 1017.59 | -22.5744 | 1 R.SSVIMLIV chr2@5767   | 2.53E-10 | 0.006853 |
| 1Mar2011- | 9927  | 888.47  | 22.8338  | 2 K.DITLEVEA Splice@chr  | 3.56E-15 | 0        |
| 1Mar2011- | 10057 | 592.65  | 24.14055 | 3 K.DITLEVEA Splice@chr  | 8.99E-11 | 0.00322  |
| 1Mar2011- | 14372 | 1147.25 | 13.44098 | 3 R.FQSAAIG Splice@chr   | 8.33E-13 | 0        |
| 1Mar2011- | 10013 | 888.47  | 22.8338  | 2 K.DITLEVEA Splice@chr  | 2.87E-12 | 2.14E-04 |
| 1Mar2011- | 5226  | 509.3   | -20.473  | 2 R.SSVIMLIV chr2@5767   | 3.76E-11 | 0.001868 |

|           |       |         |          |                         |          |          |
|-----------|-------|---------|----------|-------------------------|----------|----------|
| 1Mar2011- | 9879  | 888.47  | 22.8338  | 2 K.DITLEVEA Splice@chr | 1.19E-15 | 0        |
| 1Mar2011- | 14029 | 1096.89 | 6.757706 | 3 K.DKPFPSI Splice@chr  | 1.54E-10 | 0.004497 |
| 1Mar2011- | 9797  | 888.47  | 22.8338  | 2 K.DITLEVEA Splice@chr | 1.35E-15 | 0        |
| 1Mar2011- | 5241  | 1017.59 | -22.5744 | 1 R.SSVIMLIV chr2@5767  | 6.88E-11 | 0.002558 |
| 1Mar2011- | 7961  | 556.85  | 26.98454 | 2 R.NKEPNLII chr2@8282  | 2.40E-10 | 0.006536 |
| 1Mar2011- | 10965 | 848.97  | 0.791766 | 2 R.LLELAPTC chr2@6685  | 2.80E-19 | 0        |
| 1Mar2011- | 13225 | 934.48  | 16.93502 | 2 R.QFRQSGI chr5@4795   | 8.61E-11 | 0.003056 |
| 1Mar2011- | 13080 | 956.54  | 23.72556 | 1 K.ISLVFDVY chrX@7831  | 3.36E-10 | 0.009552 |
| 1Mar2011- | 5331  | 509.3   | -20.473  | 2 R.SSVIMLIV chr2@5767  | 9.46E-11 | 0.00322  |
| 1Mar2011- | 14716 | 1175.12 | 6.371728 | 2 K.INWAVTI chr4@2890   | 6.58E-22 | 0        |
| 1Mar2011- | 12471 | 1097.22 | 2.692596 | 3 K.DKPFPSI Splice@chr  | 5.24E-11 | 0.002022 |
| 1Mar2011- | 4436  | 596.32  | 13.94377 | 2 K.M+15.99 chr2@1468   | 2.96E-10 | 0.008475 |
| 1Mar2011- | 11730 | 826.44  | -7.65642 | 2 _K+14.016 Splice@chr  | 1.90E-11 | 0.001175 |
| 1Mar2011- | 12059 | 848.97  | 0.791766 | 2 R.LLELAPTC chr2@6685  | 8.16E-14 | 0        |
| 1Mar2011- | 10801 | 888.97  | 20.94366 | 2 K.DITLEVEA Splice@chr | 7.77E-16 | 0        |
| 1Mar2011- | 12921 | 826.45  | 4.477555 | 2 _K+14.016 Splice@chr  | 4.60E-12 | 0        |
| 1Mar2011- | 12008 | 848.97  | 0.791766 | 2 R.LLELAPTC chr2@6685  | 3.35E-17 | 0        |
| 1Mar2011- | 10957 | 888.47  | 22.8338  | 2 K.DITLEVEA Splice@chr | 2.06E-14 | 0        |
| 1Mar2011- | 6165  | 509.3   | -20.473  | 2 R.SSVIMLIV chr2@5767  | 6.48E-11 | 0.002026 |
| 1Mar2011- | 6217  | 509.3   | -20.473  | 2 R.SSVIMLIV chr2@5767  | 3.76E-11 | 0.001384 |
| 1Mar2011- | 12861 | 826.45  | 4.477555 | 2 _K+14.016 Splice@chr  | 1.01E-11 | 1.92E-04 |
| 1Mar2011- | 10083 | 780.03  | -24.5321 | 3 ?.AQDNYM Splice@chr   | 5.79E-11 | 0.002026 |
| 1Mar2011- | 16023 | 794.39  | -15.5567 | 1 _TMSKNGI chr4@8922    | 3.98E-10 | 0.008892 |
| 1Mar2011- | 6272  | 509.3   | -20.473  | 2 R.SSVIMLIV chr2@5767  | 5.33E-11 | 0.001883 |
| 1Mar2011- | 13831 | 987.51  | 4.289691 | 3 K.KYLFLDNI chr4@1288  | 5.77E-11 | 0.002026 |
| 1Mar2011- | 16142 | 860.69  | 14.08015 | 4 R.FQSAAIG Splice@chr  | 8.07E-13 | 0        |
| 1Mar2011- | 14750 | 965.53  | -19.1507 | 2 F.FLRQIRQI chr4@3226  | 9.77E-12 | 1.92E-04 |
| 1Mar2011- | 16155 | 860.69  | 14.08015 | 4 R.FQSAAIG Splice@chr  | 2.28E-14 | 0        |
| 1Mar2011- | 10134 | 780.03  | -24.5321 | 3 ?.AQDNYM Splice@chr   | 4.20E-11 | 0.001384 |
| 1Mar2011- | 14016 | 987.51  | 4.289691 | 3 K.KYLFLDNI chr4@1288  | 2.50E-10 | 0.004643 |
| 1Mar2011- | 14292 | 1013.54 | -22.3432 | 3 K.ACLNVTY chr4@4860   | 8.38E-11 | 0.002152 |
| 1Mar2011- | 2141  | 439.91  | -1.85417 | 3 K.VAGSGSL chr5@1747   | 1.59E-10 | 0.003195 |
| 1Mar2011- | 13926 | 987.84  | -0.22613 | 3 K.KYLFLDNI chr4@1288  | 3.74E-10 | 0.008183 |
| 1Mar2011- | 6116  | 509.3   | -20.473  | 2 R.SSVIMLIV chr2@5767  | 1.71E-10 | 0.003495 |
| 1Mar2011- | 12256 | 946.97  | -17.3964 | 2 K.MWMNV Splice@chr    | 3.73E-10 | 0.00804  |
| 1Mar2011- | 3839  | 533.82  | 16.26677 | 2 K.TNIYTILTI chr5@1329 | 3.97E-10 | 0.008892 |
| 1Mar2011- | 10907 | 888.47  | 22.8338  | 2 K.DITLEVEA Splice@chr | 4.98E-16 | 0        |
| 1Mar2011- | 3308  | 827.51  | -29.7395 | 2 R.RKFPK+1. chrX@2963  | 3.84E-10 | 0.008327 |
| 1Mar2011- | 16167 | 860.69  | 14.08015 | 4 R.FQSAAIG Splice@chr  | 9.48E-13 | 0        |
| 1Mar2011- | 10849 | 592.65  | 24.14055 | 3 K.DITLEVEA Splice@chr | 3.96E-12 | 0        |
| 1Mar2011- | 10851 | 888.47  | 22.8338  | 2 K.DITLEVEA Splice@chr | 1.07E-15 | 0        |
| 1Mar2011- | 11900 | 826.45  | 4.477555 | 2 _K+14.016 Splice@chr  | 3.97E-12 | 0        |
| 1Mar2011- | 11035 | 592.65  | 24.14055 | 3 K.DITLEVEA Splice@chr | 1.26E-11 | 5.64E-04 |
| 1Mar2011- | 4099  | 533.82  | 16.26677 | 2 K.TNIYTILTI chr5@1329 | 1.99E-10 | 0.003921 |
| 1Mar2011- | 4755  | 738.89  | 6.865531 | 2 K.M+15.99 chr5@5476   | 2.82E-10 | 0.005994 |
| 1Mar2011- | 14420 | 581.57  | 18.95936 | 4 K.YLGAYLL/ Splice@chr | 1.38E-12 | 0        |
| 1Mar2011- | 3569  | 563.33  | 22.46854 | 2 R.K+14.016 Splice@chr | 1.29E-10 | 0.002422 |

|           |       |         |          |                         |          |          |
|-----------|-------|---------|----------|-------------------------|----------|----------|
| 1Mar2011- | 11014 | 888.47  | 22.8338  | 2 K.DITLEVEA Splice@chr | 1.54E-13 | 0        |
| 1Mar2011- | 13411 | 1167.55 | -25.3067 | 2 L.K+14.016 Splice@chr | 2.02E-11 | 0.00111  |
| 1Mar2011- | 11737 | 888.97  | 20.94366 | 2 K.DITLEVEA Splice@chr | 8.63E-16 | 0        |
| 1Mar2011- | 4301  | 533.82  | 16.26677 | 2 K.TNIYTILTI chr5@1329 | 1.95E-10 | 0.005303 |
| 1Mar2011- | 12984 | 848.97  | 0.791766 | 2 R.LLELAPTC chr2@6685  | 6.37E-18 | 0        |
| 1Mar2011- | 11790 | 888.47  | 22.8338  | 2 K.DITLEVEA Splice@chr | 1.29E-15 | 0        |
| 1Mar2011- | 17358 | 860.69  | 14.08015 | 4 R.FQSAAIG Splice@chr  | 1.58E-13 | 0        |
| 1Mar2011- | 5382  | 496.3   | 9.488848 | 2 R.EIKLFDVK Splice@chr | 4.61E-10 | 0.009736 |
| 1Mar2011- | 11679 | 888.47  | 22.8338  | 2 K.DITLEVEA Splice@chr | 1.21E-15 | 0        |
| 1Mar2011- | 13840 | 825.95  | 6.510915 | 2 _K+14.016 Splice@chr  | 2.10E-10 | 0.005552 |
| 1Mar2011- | 13648 | 731.74  | 25.61531 | 3 R.ATDDWII Splice@chr  | 2.35E-10 | 0.005668 |
| 1Mar2011- | 13361 | 1167.55 | -25.3067 | 2 L.K+14.016 Splice@chr | 6.42E-14 | 0        |
| 1Mar2011- | 14598 | 987.51  | 4.289691 | 3 K.KYLFLDNI chr4@1288  | 1.07E-10 | 0.004069 |
| 1Mar2011- | 17647 | 828.39  | -8.00743 | 2 K.PNLK+14 chr2@3862   | 8.58E-12 | 3.38E-04 |
| 1Mar2011- | 11894 | 888.47  | 22.8338  | 2 K.DITLEVEA Splice@chr | 3.77E-13 | 0        |
| 1Mar2011- | 16877 | 1096.89 | 6.757706 | 3 K.DKPFFPSI Splice@chr | 2.94E-11 | 0.001411 |
| 1Mar2011- | 13358 | 993.51  | 12.98097 | 3 R.WTESTILI Splice@chr | 4.76E-10 | 0.009851 |
| 1Mar2011- | 8508  | 671.37  | -24.0361 | 2 T.FNIVHTQ Splice@chr  | 4.21E-10 | 0.008987 |
| 1Mar2011- | 16854 | 1096.89 | 6.757706 | 3 K.DKPFFPSI Splice@chr | 5.49E-12 | 3.38E-04 |
| 1Mar2011- | 3802  | 693.87  | -6.6949  | 2 V.ICVAVGD chr5@1063   | 9.57E-11 | 0.003366 |
| 1Mar2011- | 4353  | 533.82  | 16.26677 | 2 K.TNIYTILTI chr5@1329 | 3.88E-10 | 0.00808  |
| 1Mar2011- | 12931 | 848.97  | 0.791766 | 2 R.LLELAPTC chr2@6685  | 5.68E-18 | 0        |
| 1Mar2011- | 13737 | 826.44  | -7.65642 | 2 _K+14.016 Splice@chr  | 2.54E-11 | 0.00111  |
| 1Mar2011- | 8561  | 671.37  | -24.0361 | 2 T.FNIVHTQ Splice@chr  | 3.63E-10 | 0.00756  |
| 1Mar2011- | 13780 | 825.94  | -5.62306 | 2 _K+14.016 Splice@chr  | 1.71E-11 | 0.00111  |
| 1Mar2011- | 11930 | 592.65  | 24.14055 | 3 K.DITLEVEA Splice@chr | 3.14E-11 | 0.001411 |
| 1Mar2011- | 11245 | 622.33  | 9.587405 | 2 R.AK+14.01 chr2@4270  | 3.09E-10 | 0.007087 |
| 1Mar2011- | 8942  | 859.14  | 2.870693 | 3 _LRFKDNC chrX@1053    | 2.44E-10 | 0.006064 |
| 1Mar2011- | 5433  | 496.3   | 9.488848 | 2 R.EIKLFDVK Splice@chr | 4.03E-10 | 0.008467 |
| 1Mar2011- | 14795 | 987.51  | 4.289691 | 3 K.KYLFLDNI chr4@1288  | 4.58E-10 | 0.009736 |
| 1Mar2011- | 11843 | 888.47  | 22.8338  | 2 K.DITLEVEA Splice@chr | 1.06E-13 | 0        |
| 1Mar2011- | 4246  | 533.82  | 16.26677 | 2 K.TNIYTILTI chr5@1329 | 4.45E-10 | 0.009615 |
| 1Mar2011- | 17375 | 860.69  | 14.08015 | 4 R.FQSAAIG Splice@chr  | 9.72E-16 | 0        |
| 1Mar2011- | 8501  | 661.4   | -2.4954  | 2 K.LVLIAVN1 chr1@6528  | 2.18E-10 | 0.005552 |
| 1Mar2011- | 14871 | 1097.22 | 2.692596 | 3 K.DKPFFPSI Splice@chr | 3.74E-11 | 0.001549 |
| 1Mar2011- | 15658 | 956.54  | 23.72556 | 1 K.ISLVFDVY chrX@7831  | 2.30E-10 | 0.005668 |
| 1Mar2011- | 11881 | 592.65  | 24.14055 | 3 K.DITLEVEA Splice@chr | 2.26E-11 | 0.00111  |
| 1Mar2011- | 16672 | 968.13  | 18.26018 | 3 _GCSIVPIS Splice@chr  | 1.20E-10 | 0.004455 |
| 1Mar2011- | 2927  | 564.32  | -22.6447 | 2 K.IFVLKHEN chr5@1811  | 3.60E-10 | 0.007442 |
| 1Mar2011- | 11721 | 592.98  | 16.54196 | 3 K.DITLEVEA Splice@chr | 8.48E-14 | 0        |
| 1Mar2011- | 14824 | 1097.22 | 2.692596 | 3 K.DKPFFPSI Splice@chr | 2.23E-10 | 0.005668 |
| 1Mar2011- | 17854 | 783.75  | 7.307848 | 3 K.INWAVTI chr4@2890   | 1.59E-16 | 0        |
| 1Mar2011- | 17851 | 1175.12 | 6.371728 | 2 K.INWAVTI chr4@2890   | 1.09E-20 | 0        |
| 1Mar2011- | 12045 | 826.44  | -7.65642 | 2 _K+14.016 Splice@chr  | 2.92E-10 | 0.006964 |
| 1Mar2011- | 16518 | 956.54  | 23.72556 | 1 K.ISLVFDVY chrX@7831  | 3.21E-10 | 0.009803 |
| 1Mar2011- | 18611 | 860.69  | 14.08015 | 4 R.FQSAAIG Splice@chr  | 1.47E-16 | 0        |
| 1Mar2011- | 3954  | 533.82  | 16.26677 | 2 K.TNIYTILTI chr5@1329 | 2.45E-10 | 0.00791  |

|           |       |         |          |                         |          |          |
|-----------|-------|---------|----------|-------------------------|----------|----------|
| 1Mar2011- | 13583 | 848.97  | 0.791766 | 2 R.LLELAPT chr2@6685   | 1.72E-18 | 0        |
| 1Mar2011- | 11981 | 888.97  | 20.94366 | 2 K.DITLEVEA Splice@chr | 6.60E-16 | 0        |
| 1Mar2011- | 1140  | 665.39  | 11.85105 | 2 R.QLQM+1 chr5@7160    | 3.19E-10 | 0.009803 |
| 1Mar2011- | 12088 | 888.97  | 20.94366 | 2 K.DITLEVEA Splice@chr | 1.32E-15 | 0        |
| 1Mar2011- | 14548 | 825.95  | 6.510915 | 2 _K+14.016 Splice@chr  | 3.19E-11 | 0.00102  |
| 1Mar2011- | 16961 | 805.97  | -15.8175 | 2 K.TPIFIPAP chr5@1861  | 3.13E-10 | 0.009574 |
| 1Mar2011- | 10031 | 1106.03 | -18.2067 | 2 K.FQMGHE chr4@1995    | 1.48E-10 | 0.004696 |
| 1Mar2011- | 15428 | 987.51  | 4.289691 | 3 K.KYLFLDNI chr4@1288  | 8.44E-11 | 0.002499 |
| 1Mar2011- | 14078 | 1187.58 | 10.28775 | 3 R.NGAPPSC Splice@chr  | 2.13E-10 | 0.00759  |
| 1Mar2011- | 16093 | 1013.54 | -22.3432 | 3 K.ACLNVTY chr4@4860   | 1.33E-10 | 0.004184 |
| 1Mar2011- | 12251 | 888.47  | 22.8338  | 2 K.DITLEVEA Splice@chr | 3.21E-13 | 0        |
| 1Mar2011- | 6353  | 571.86  | -2.35222 | 2 T.KKGDIVI chr5@1238   | 2.75E-10 | 0.008488 |
| 1Mar2011- | 15571 | 1097.23 | 11.82664 | 3 K.DKPFFPSI Splice@chr | 1.29E-12 | 1.63E-04 |
| 1Mar2011- | 12135 | 888.97  | 20.94366 | 2 K.DITLEVEA Splice@chr | 1.63E-16 | 0        |
| 1Mar2011- | 11681 | 622.33  | 9.587405 | 2 R.AK+14.01 chr2@4270  | 1.55E-11 | 4.62E-04 |
| 1Mar2011- | 6717  | 509.3   | -20.473  | 2 R.SSVIMLIV chr2@5767  | 5.33E-11 | 0.001721 |
| 1Mar2011- | 14552 | 732.07  | 19.51873 | 3 R.ATDDWII Splice@chr  | 2.99E-10 | 0.00921  |
| 1Mar2011- | 18590 | 1147.25 | 13.44098 | 3 R.FQSAAIG Splice@chr  | 2.59E-14 | 0        |
| 1Mar2011- | 12194 | 888.97  | 20.94366 | 2 K.DITLEVEA Splice@chr | 8.75E-16 | 0        |
| 1Mar2011- | 7137  | 897.42  | -27.6753 | 3 _QVREMH Splice@chr    | 3.06E-10 | 0.00933  |
| 1Mar2011- | 17968 | 1096.89 | 6.757706 | 3 K.DKPFFPSI Splice@chr | 1.77E-13 | 0        |
| 1Mar2011- | 14495 | 732.07  | 19.51873 | 3 R.ATDDWII Splice@chr  | 2.09E-10 | 0.007466 |
| 1Mar2011- | 19101 | 1174.62 | 7.800997 | 2 K.INWAVTI chr4@2890   | 2.29E-21 | 0        |
| 1Mar2011- | 12310 | 888.97  | 20.94366 | 2 K.DITLEVEA Splice@chr | 8.88E-13 | 0        |
| 1Mar2011- | 17938 | 1096.89 | 6.757706 | 3 K.DKPFFPSI Splice@chr | 3.06E-10 | 0.00933  |
| 1Mar2011- | 480   | 452.23  | -1.48793 | 2 R.SGEPLSA Splice@chr  | 1.23E-10 | 0.003805 |
| 1Mar2011- | 12035 | 888.47  | 22.8338  | 2 K.DITLEVEA Splice@chr | 1.77E-15 | 0        |
| 1Mar2011- | 16124 | 1097.23 | 11.82664 | 3 K.DKPFFPSI Splice@chr | 1.04E-11 | 4.62E-04 |
| 1Mar2011- | 19103 | 783.75  | 7.307848 | 3 K.INWAVTI chr4@2890   | 9.69E-17 | 0        |
| 1Mar2011- | 18488 | 1097.23 | 11.82664 | 3 K.DKPFFPSI Splice@chr | 9.97E-11 | 0.003031 |
| 1Mar2011- | 6662  | 509.3   | -20.473  | 2 R.SSVIMLIV chr2@5767  | 5.33E-11 | 0.001721 |
| 1Mar2011- | 19321 | 780.93  | 7.669343 | 4 E.LFQIIVM chr2@1065   | 9.09E-11 | 0.002499 |
| 1Mar2011- | 16499 | 589.8   | 15.96415 | 2 K.KSEIVNY chrX@8555   | 5.11E-11 | 0.001437 |
| 1Mar2011- | 18633 | 860.69  | 14.08015 | 4 R.FQSAAIG Splice@chr  | 7.40E-16 | 0        |
| 1Mar2011- | 6612  | 509.8   | -23.773  | 2 R.SSVIMLIV chr2@5767  | 9.71E-11 | 0.003031 |
| 1Mar2011- | 446   | 452.23  | -1.48793 | 2 R.SGEPLSA Splice@chr  | 9.38E-11 | 0.002772 |
| 1Mar2011- | 8485  | 583.83  | -11.3703 | 2 R.LVPITFS chr1@2422   | 3.15E-10 | 0.009803 |
| 1Mar2011- | 15514 | 1097.22 | 2.692596 | 3 K.DKPFFPSI Splice@chr | 6.67E-12 | 1.63E-04 |
| 1Mar2011- | 19304 | 1040.9  | 3.834672 | 3 E.LFQIIVM chr2@1065   | 6.28E-12 | 1.63E-04 |
| 1Mar2011- | 12928 | 825.95  | 6.510915 | 2 _K+14.016 Splice@chr  | 1.90E-10 | 0.005819 |
| 1Mar2011- | 14104 | 812.12  | 14.27915 | 3 A.EITEMLP Splice@chr  | 1.75E-12 | 0        |
| 1Mar2011- | 3448  | 693.87  | -6.6949  | 2 V.ICVAVGD chr5@1063   | 8.03E-11 | 0.002652 |
| 1Mar2011- | 2800  | 553.33  | -3.70337 | 2 K.PQAKPNI chr5@9002   | 1.48E-10 | 0.004497 |
| 1Mar2011- | 9552  | 838.94  | -22.1914 | 2 R.QFADLPS chr5@1898   | 1.99E-10 | 0.005819 |
| 1Mar2011- | 4000  | 563.33  | 22.46854 | 2 R.K+14.016 Splice@chr | 1.55E-10 | 0.004796 |
| 1Mar2011- | 10401 | 780.03  | -24.5321 | 3 ?.AQDNYM Splice@chr   | 1.24E-11 | 7.23E-04 |
| 1Mar2011- | 15953 | 688.75  | 8.895763 | 5 R.FQSAAIG Splice@chr  | 8.71E-11 | 0.002652 |

|           |       |         |          |                         |          |          |
|-----------|-------|---------|----------|-------------------------|----------|----------|
| 1Mar2011- | 11124 | 888.47  | 22.8338  | 2 K.DITLEVEA Splice@chr | 2.05E-15 | 0        |
| 1Mar2011- | 11119 | 592.65  | 24.14055 | 3 K.DITLEVEA Splice@chr | 1.48E-10 | 0.004497 |
| 1Mar2011- | 6175  | 509.3   | -20.473  | 2 R.SSVIMLIV chr2@5767  | 1.12E-10 | 0.003269 |
| 1Mar2011- | 12282 | 849.47  | -1.18638 | 2 R.LLELAPTC chr2@6685  | 2.64E-17 | 0        |
| 1Mar2011- | 6478  | 558.3   | -2.40945 | 3 R.EK+14.01 chr1@1077  | 5.03E-11 | 0.001716 |
| 1Mar2011- | 14412 | 581.57  | 18.95936 | 4 K.YLGAYLL/ Splice@chr | 7.36E-11 | 0.002363 |
| 1Mar2011- | 15952 | 860.69  | 14.08015 | 4 R.FQSAAIG Splice@chr  | 2.24E-12 | 2.15E-04 |
| 1Mar2011- | 6231  | 509.3   | -20.473  | 2 R.SSVIMLIV chr2@5767  | 8.25E-11 | 0.002652 |
| 1Mar2011- | 15958 | 1147.25 | 13.44098 | 3 R.FQSAAIG Splice@chr  | 5.17E-16 | 0        |
| 1Mar2011- | 11380 | 592.65  | 24.14055 | 3 K.DITLEVEA Splice@chr | 2.64E-11 | 8.90E-04 |
| 1Mar2011- | 5630  | 560.6   | -22.2499 | 3 _EMFSAA\ chr4@3419    | 1.02E-10 | 0.002962 |
| 1Mar2011- | 13840 | 987.51  | 4.289691 | 3 K.KYLFLDNI chr4@1288  | 9.40E-11 | 0.002811 |
| 1Mar2011- | 11171 | 592.65  | 24.14055 | 3 K.DITLEVEA Splice@chr | 1.83E-12 | 0        |
| 1Mar2011- | 11176 | 888.47  | 22.8338  | 2 K.DITLEVEA Splice@chr | 1.89E-15 | 0        |
| 1Mar2011- | 16029 | 1070.59 | 21.26795 | 2 R.KSTENMI chr1@1074   | 1.38E-10 | 0.004037 |
| 1Mar2011- | 16030 | 1014.24 | -14.0392 | 3 R.KLMSLAV chr5@1141   | 9.04E-11 | 0.002652 |
| 1Mar2011- | 14066 | 812.12  | 14.27915 | 3 A.EITEMLPi Splice@chr | 6.09E-13 | 0        |
| 1Mar2011- | 11071 | 888.97  | 20.94366 | 2 K.DITLEVEA Splice@chr | 1.37E-15 | 0        |
| 1Mar2011- | 10453 | 780.03  | -24.5321 | 3 ?.AQDNYM Splice@chr   | 1.66E-11 | 7.23E-04 |
| 1Mar2011- | 11292 | 888.97  | 20.94366 | 2 K.DITLEVEA Splice@chr | 3.16E-13 | 0        |
| 1Mar2011- | 10509 | 780.03  | -24.5321 | 3 ?.AQDNYM Splice@chr   | 8.60E-11 | 0.002652 |
| 1Mar2011- | 204   | 544.29  | 17.07677 | 2 K.QNFIHET. chr1@5247  | 4.65E-11 | 0.001561 |
| 1Mar2011- | 5520  | 560.61  | -4.36273 | 3 _EMFSAA\ chr4@3419    | 1.18E-10 | 0.003584 |
| 1Mar2011- | 6184  | 582.35  | -7.8392  | 3 K.LERNSLKI chr1@1139  | 2.30E-10 | 0.007024 |
| 1Mar2011- | 10370 | 938.46  | 22.50833 | 2 R.ECSQSDS chr2@8876   | 1.10E-10 | 0.003269 |
| 1Mar2011- | 11238 | 888.47  | 22.8338  | 2 K.DITLEVEA Splice@chr | 1.23E-14 | 0        |
| 1Mar2011- | 12226 | 848.97  | 0.791766 | 2 R.LLELAPTC chr2@6685  | 2.20E-17 | 0        |
| 1Mar2011- | 15942 | 860.69  | 14.08015 | 4 R.FQSAAIG Splice@chr  | 3.75E-14 | 0        |
| 1Mar2011- | 1943  | 487.28  | -16.4424 | 2 K.LQTSNGL Splice@chr  | 2.14E-10 | 0.006122 |
| 1Mar2011- | 11261 | 622.33  | 9.587405 | 2 R.AK+14.01 chr2@4270  | 1.62E-10 | 0.004904 |
| 1Mar2011- | 11642 | 592.65  | 24.14055 | 3 K.DITLEVEA Splice@chr | 7.10E-12 | 0        |
| 1Mar2011- | 4635  | 533.82  | 16.26677 | 2 K.TNIYTILTI chr5@1329 | 2.51E-10 | 0.006649 |
| 1Mar2011- | 11950 | 825.94  | -5.62306 | 2 _K+14.016 Splice@chr  | 1.44E-10 | 0.003893 |
| 1Mar2011- | 16464 | 860.69  | 14.08015 | 4 R.FQSAAIG Splice@chr  | 2.86E-15 | 0        |
| 1Mar2011- | 16465 | 688.75  | 8.895763 | 5 R.FQSAAIG Splice@chr  | 5.27E-12 | 0        |
| 1Mar2011- | 8397  | 583.83  | -11.3703 | 2 R.LVPITFS chr1@2422   | 1.18E-10 | 0.003171 |
| 1Mar2011- | 14466 | 1003.19 | 17.13413 | 3 R.CWNRRA Splice@chr   | 3.83E-13 | 0        |
| 1Mar2011- | 14263 | 987.51  | 4.289691 | 3 K.KYLFLDNI chr4@1288  | 2.57E-10 | 0.006778 |
| 1Mar2011- | 6193  | 800.49  | 2.290306 | 1 K.VEAVALI Splice@chr  | 7.89E-11 | 0.002022 |
| 1Mar2011- | 487   | 665.38  | -3.2154  | 2 R.QLQM+1 chr5@7160    | 3.08E-10 | 0.009577 |
| 1Mar2011- | 12810 | 848.97  | 0.791766 | 2 R.LLELAPTC chr2@6685  | 6.85E-19 | 0        |
| 1Mar2011- | 15180 | 957.5   | 22.57714 | 3 K.LFQVLQN Splice@chr  | 3.07E-11 | 4.93E-04 |
| 1Mar2011- | 16946 | 987.54  | -8.51007 | 2 K.EMINALS chr4@1164   | 3.09E-10 | 0.009709 |
| 1Mar2011- | 4205  | 693.87  | -6.6949  | 2 V.ICVAVGD chr5@1063   | 2.37E-10 | 0.006237 |
| 1Mar2011- | 9130  | 833.41  | -5.13266 | 2 _IDM+15.9 chrX@3237   | 4.95E-11 | 0.001443 |
| 1Mar2011- | 15859 | 968.13  | 14.47345 | 3 _CSIRPISG Splice@chr  | 3.99E-11 | 8.12E-04 |
| 1Mar2011- | 11692 | 888.47  | 22.8338  | 2 K.DITLEVEA Splice@chr | 3.24E-15 | 0        |

|           |       |         |          |                         |          |          |
|-----------|-------|---------|----------|-------------------------|----------|----------|
| 1Mar2011- | 15430 | 805.97  | -15.8175 | 2 K.TPIFIPAP chr5@1861  | 5.13E-11 | 0.001443 |
| 1Mar2011- | 11585 | 888.47  | 22.8338  | 2 K.DITLEVEA Splice@chr | 1.77E-15 | 0        |
| 1Mar2011- | 6064  | 975.56  | -2.75567 | 1 K.LPKLDAYI chr4@1145  | 1.42E-10 | 0.00375  |
| 1Mar2011- | 6929  | 509.8   | -23.773  | 2 R.SSVIMLIV chr2@5767  | 5.33E-11 | 0.001599 |
| 1Mar2011- | 7141  | 558.3   | -2.40945 | 3 R.EK+14.01 chr1@1077  | 9.45E-11 | 0.00215  |
| 1Mar2011- | 11636 | 888.47  | 22.8338  | 2 K.DITLEVEA Splice@chr | 1.36E-15 | 0        |
| 1Mar2011- | 13558 | 826.45  | 4.477555 | 2 _K+14.016 Splice@chr  | 1.54E-10 | 0.004466 |
| 1Mar2011- | 2657  | 431.74  | 5.455516 | 2 _PIQDVYK Splice@chr   | 1.99E-10 | 0.005861 |
| 1Mar2011- | 11611 | 965.77  | 16.46969 | 4 R.KTSSCQK chr5@2085   | 2.56E-10 | 0.006778 |
| 1Mar2011- | 5150  | 1025.61 | -11.6755 | 1 K.LGLGSGL chr5@4945   | 7.91E-12 | 1.70E-04 |
| 1Mar2011- | 11858 | 888.97  | 20.94366 | 2 K.DITLEVEA Splice@chr | 1.34E-12 | 0        |
| 1Mar2011- | 14620 | 812.12  | 14.27915 | 3 A.EITEMLPi Splice@chr | 1.83E-14 | 0        |
| 1Mar2011- | 4692  | 533.82  | 16.26677 | 2 K.TNIYTILTI chr5@1325 | 2.85E-10 | 0.008475 |
| 1Mar2011- | 15553 | 1161.64 | 27.13607 | 2 K.YLGAYLL/ Splice@chr | 2.74E-13 | 0        |
| 1Mar2011- | 4799  | 533.82  | 16.26677 | 2 K.TNIYTILTI chr5@1325 | 2.38E-10 | 0.006237 |
| 1Mar2011- | 10847 | 780.03  | -24.5321 | 3 ?.AQDNYM Splice@chr   | 1.43E-10 | 0.00375  |
| 1Mar2011- | 13112 | 1167.56 | -16.7225 | 2 L.K+14.016 Splice@chr | 1.62E-11 | 1.70E-04 |
| 1Mar2011- | 16444 | 1147.25 | 13.44098 | 3 R.FQSAAIG Splice@chr  | 3.73E-16 | 0        |
| 1Mar2011- | 4187  | 693.87  | -6.6949  | 2 V.ICVAVGD chr5@1065   | 2.29E-10 | 0.007286 |
| 1Mar2011- | 18899 | 783.75  | 7.307848 | 3 K.INWAVTI chr4@2890   | 3.69E-19 | 0        |
| 1Mar2011- | 12466 | 888.47  | 22.8338  | 2 K.DITLEVEA Splice@chr | 1.19E-12 | 0        |
| 1Mar2011- | 14425 | 732.07  | 19.51873 | 3 R.ATDDWII Splice@chr  | 1.47E-10 | 0.004731 |
| 1Mar2011- | 12517 | 592.98  | 16.54196 | 3 K.DITLEVEA Splice@chr | 1.81E-10 | 0.005831 |
| 1Mar2011- | 5114  | 1025.62 | -1.90621 | 1 K.LGLGSGL chr5@4945   | 5.14E-11 | 0.001552 |
| 1Mar2011- | 16226 | 581.32  | 20.40464 | 4 K.YLGAYLL/ Splice@chr | 2.64E-13 | 0        |
| 1Mar2011- | 18355 | 860.69  | 14.08015 | 4 R.FQSAAIG Splice@chr  | 8.11E-15 | 0        |
| 1Mar2011- | 12352 | 888.97  | 20.94366 | 2 K.DITLEVEA Splice@chr | 5.20E-16 | 0        |
| 1Mar2011- | 13713 | 848.97  | 0.791766 | 2 R.LLELAPTC chr2@6685  | 2.52E-16 | 0        |
| 1Mar2011- | 8695  | 661.4   | -2.4954  | 2 K.LVLIAVN7 chr1@6528  | 3.35E-10 | 0.009844 |
| 1Mar2011- | 6363  | 560.6   | -22.2499 | 3 _EMFSAA\ chr4@3415    | 2.82E-10 | 0.008811 |
| 1Mar2011- | 9599  | 516.29  | 9.357636 | 2 K.VSVDVLE chrX@1218   | 1.03E-10 | 0.003739 |
| 1Mar2011- | 14142 | 946.46  | -26.1447 | 2 K.MWMNV Splice@chr    | 1.39E-10 | 0.004361 |
| 1Mar2011- | 18909 | 1175.13 | 14.90082 | 2 K.INWAVTI chr4@2890   | 1.76E-20 | 0        |
| 1Mar2011- | 18895 | 1175.13 | 14.90082 | 2 K.INWAVTI chr4@2890   | 1.08E-23 | 0        |
| 1Mar2011- | 12244 | 888.97  | 20.94366 | 2 K.DITLEVEA Splice@chr | 1.08E-15 | 0        |
| 1Mar2011- | 12300 | 888.47  | 22.8338  | 2 K.DITLEVEA Splice@chr | 4.34E-15 | 0        |
| 1Mar2011- | 18676 | 828.39  | -8.00743 | 2 K.PNLK+14 chr2@3862   | 1.72E-11 | 4.39E-04 |
| 1Mar2011- | 15573 | 987.51  | 4.289691 | 3 K.KYLFLDNI chr4@1288  | 1.08E-10 | 0.003739 |
| 1Mar2011- | 12524 | 888.97  | 20.94366 | 2 K.DITLEVEA Splice@chr | 1.71E-12 | 0        |
| 1Mar2011- | 5001  | 1025.62 | -1.90621 | 1 K.LGLGSGL chr5@4945   | 3.73E-11 | 0.00114  |
| 1Mar2011- | 4521  | 533.82  | 16.26677 | 2 K.TNIYTILTI chr5@1325 | 1.65E-10 | 0.0052   |
| 1Mar2011- | 13657 | 848.97  | 0.791766 | 2 R.LLELAPTC chr2@6685  | 2.30E-17 | 0        |
| 1Mar2011- | 17836 | 1096.89 | 6.757706 | 3 K.DKPFFPSI Splice@chr | 6.09E-11 | 0.002084 |
| 1Mar2011- | 4791  | 534.32  | 13.11853 | 2 K.TNIYTILTI chr5@1325 | 2.76E-10 | 0.008576 |
| 1Mar2011- | 12410 | 888.47  | 22.8338  | 2 K.DITLEVEA Splice@chr | 8.45E-14 | 0        |
| 1Mar2011- | 19034 | 1040.9  | 3.834672 | 3 E.LFQIIVM7 chr2@1065  | 2.32E-11 | 4.39E-04 |
| 1Mar2011- | 10907 | 854.95  | 17.20129 | 2 _KSFEVAIC Splice@chr  | 4.73E-14 | 0        |

|           |       |         |          |                         |          |          |
|-----------|-------|---------|----------|-------------------------|----------|----------|
| 1Mar2011- | 12191 | 888.97  | 20.94366 | 2 K.DITLEVEA Splice@chr | 2.43E-15 | 0        |
| 1Mar2011- | 11858 | 888.47  | 22.8338  | 2 K.DITLEVEA Splice@chr | 1.91E-15 | 0        |
| 1Mar2011- | 12152 | 826.45  | 4.477555 | 2 _K+14.016 Splice@chr  | 1.88E-10 | 0.004315 |
| 1Mar2011- | 11080 | 780.03  | -24.5321 | 3 ?.AQDNYM Splice@chr   | 4.70E-11 | 7.16E-04 |
| 1Mar2011- | 18750 | 783.75  | 7.307848 | 3 K.INWAVTI chr4@2890   | 8.29E-17 | 0        |
| 1Mar2011- | 18490 | 828.39  | -8.00743 | 2 K.PNLK+14 chr2@3862   | 1.86E-10 | 0.004201 |
| 1Mar2011- | 12187 | 888.97  | 20.94366 | 2 K.DITLEVEA Splice@chr | 1.55E-13 | 0        |
| 1Mar2011- | 11592 | 622.33  | 9.587405 | 2 R.AK+14.01 chr2@4270  | 1.49E-10 | 0.003067 |
| 1Mar2011- | 12131 | 888.47  | 22.8338  | 2 K.DITLEVEA Splice@chr | 6.68E-13 | 0        |
| 1Mar2011- | 11535 | 622.33  | 9.587405 | 2 R.AK+14.01 chr2@4270  | 3.30E-10 | 0.008708 |
| 1Mar2011- | 13296 | 848.97  | 0.791766 | 2 R.LLELAPTC chr2@6685  | 1.71E-19 | 0        |
| 1Mar2011- | 13197 | 722.45  | -4.95112 | 2 R.RK+14.01 Splice@chr | 2.61E-10 | 0.006533 |
| 1Mar2011- | 10541 | 618.32  | 1.155298 | 3 K.LTNLSTA Splice@chr  | 1.54E-10 | 0.003194 |
| 1Mar2011- | 11968 | 888.47  | 22.8338  | 2 K.DITLEVEA Splice@chr | 3.04E-16 | 0        |
| 1Mar2011- | 12079 | 888.47  | 22.8338  | 2 K.DITLEVEA Splice@chr | 2.51E-14 | 0        |
| 1Mar2011- | 12021 | 888.97  | 20.94366 | 2 K.DITLEVEA Splice@chr | 1.72E-15 | 0        |
| 1Mar2011- | 16587 | 805.47  | -13.7324 | 2 K.TPIFIPAP chr5@1861  | 1.44E-10 | 0.003067 |
| 1Mar2011- | 5777  | 596.32  | 13.94377 | 2 K.M+15.99 chr2@1468   | 2.91E-10 | 0.007636 |
| 1Mar2011- | 18222 | 860.69  | 14.08015 | 4 R.FQSAAIG Splice@chr  | 9.14E-15 | 0        |
| 1Mar2011- | 14240 | 826.45  | 4.477555 | 2 _K+14.016 Splice@chr  | 4.87E-11 | 7.16E-04 |
| 1Mar2011- | 14180 | 826.45  | 4.477555 | 2 _K+14.016 Splice@chr  | 1.11E-11 | 4.67E-04 |
| 1Mar2011- | 14139 | 732.07  | 19.51873 | 3 R.ATDDWII Splice@chr  | 1.19E-10 | 0.002708 |
| 1Mar2011- | 2865  | 407.74  | 5.852463 | 2 R.ASDIAPIK chrX@1795  | 1.15E-10 | 0.002445 |
| 1Mar2011- | 13242 | 849.48  | 10.61812 | 2 R.LLELAPTC chr2@6685  | 8.54E-19 | 0        |
| 1Mar2011- | 11910 | 888.47  | 22.8338  | 2 K.DITLEVEA Splice@chr | 1.47E-15 | 0        |
| 1Mar2011- | 15403 | 987.84  | -0.22613 | 3 K.KYLFLDNI chr4@1288  | 1.36E-10 | 0.002951 |
| 1Mar2011- | 3959  | 693.87  | -6.6949  | 2 V.ICVAVGD chr5@1063   | 2.51E-10 | 0.006305 |
| 1Mar2011- | 18966 | 780.93  | 7.669343 | 4 E.LFQIIVM chr2@1065   | 2.07E-10 | 0.004805 |
| 1Mar2011- | 12357 | 888.93  | -24.105  | 2 K.DITLEVEA Splice@chr | 1.58E-11 | 5.76E-04 |
| 1Mar2011- | 14835 | 665.37  | -26.6417 | 2 Q.INNK+14 Splice@chr  | 3.60E-10 | 0.009414 |
| 1Mar2011- | 12080 | 592.65  | 24.14055 | 3 K.DITLEVEA Splice@chr | 1.21E-11 | 4.67E-04 |
| 1Mar2011- | 10118 | 838.94  | -22.1914 | 2 R.QFADLPS chr5@1898   | 2.85E-10 | 0.007396 |
| 1Mar2011- | 3903  | 693.87  | -6.6949  | 2 V.ICVAVGD chr5@1063   | 1.58E-10 | 0.003451 |
| 1Mar2011- | 18751 | 1174.63 | 16.33009 | 2 K.INWAVTI chr4@2890   | 2.15E-22 | 0        |
| 1Mar2011- | 5566  | 563.33  | 22.46854 | 2 R.K+14.016 Splice@chr | 2.29E-10 | 0.005682 |
| 1Mar2011- | 2102  | 439.91  | 17.33685 | 3 K.NSQKNPI chr2@3540   | 3.06E-10 | 0.007723 |
| 1Mar2011- | 17041 | 934.48  | 16.93502 | 2 R.QFRQSGI chr5@4795   | 1.80E-10 | 0.003665 |
| 1Mar2011- | 18371 | 1147.25 | 13.44098 | 3 R.FQSAAIG Splice@chr  | 3.75E-16 | 0        |
| 1Mar2011- | 6800  | 975.55  | -13.0268 | 1 K.LPKLDAYI chr4@1145  | 1.51E-10 | 0.003293 |
| 1Mar2011- | 7864  | 1017.59 | -22.5744 | 1 R.SSVIMLIV chr2@5767  | 1.19E-10 | 0.00296  |
| 1Mar2011- | 14363 | 849.47  | -1.18638 | 2 R.LLELAPTC chr2@6685  | 1.69E-17 | 0        |
| 1Mar2011- | 16177 | 1097.22 | 2.692596 | 3 K.DKPFPSI Splice@chr  | 1.33E-12 | 0        |
| 1Mar2011- | 15921 | 665.37  | -26.6417 | 2 Q.INNK+14 Splice@chr  | 3.54E-10 | 0.008409 |
| 1Mar2011- | 5667  | 1025.61 | -11.6755 | 1 K.LGLGSGI chr5@4945   | 4.02E-12 | 0        |
| 1Mar2011- | 4677  | 693.87  | -6.6949  | 2 V.ICVAVGD chr5@1063   | 1.91E-10 | 0.004027 |
| 1Mar2011- | 11283 | 838.94  | -22.1914 | 2 R.QFADLPS chr5@1898   | 3.06E-10 | 0.007723 |
| 1Mar2011- | 12687 | 622.33  | 9.587405 | 2 R.AK+14.01 chr2@4270  | 3.97E-10 | 0.009336 |

|           |       |         |          |                          |          |          |
|-----------|-------|---------|----------|--------------------------|----------|----------|
| 1Mar2011- | 5180  | 533.82  | 16.26677 | 2 K.TNIYTILTI chr5@1329  | 2.55E-10 | 0.005361 |
| 1Mar2011- | 5235  | 533.82  | 16.26677 | 2 K.TNIYTILTI chr5@1329  | 3.42E-10 | 0.008409 |
| 1Mar2011- | 10185 | 833.9   | -19.0995 | 2 _ .IDM+15.5 chrX@3237  | 2.77E-11 | 2.95E-04 |
| 1Mar2011- | 5720  | 1025.61 | -11.6755 | 1 K.LGLGSGL chr5@4945    | 2.36E-11 | 2.95E-04 |
| 1Mar2011- | 17667 | 968.13  | 18.26018 | 3 _ .GCSIVPIS Splice@chr | 4.01E-12 | 0        |
| 1Mar2011- | 18974 | 1040.89 | -5.8694  | 3 E.LFQIIVM+ chr2@1065   | 1.14E-10 | 0.002842 |
| 1Mar2011- | 13145 | 888.47  | 22.8338  | 2 K.DITLEVEA Splice@chr  | 1.22E-15 | 0        |
| 1Mar2011- | 5291  | 533.82  | 16.26677 | 2 K.TNIYTILTI chr5@1329  | 1.99E-10 | 0.004027 |
| 1Mar2011- | 10296 | 516.29  | 9.357636 | 2 K.VSVDVLE chrX@1218    | 2.50E-10 | 0.004987 |
| 1Mar2011- | 15243 | 825.94  | -5.62306 | 2 _ .K+14.016 Splice@chr | 7.46E-11 | 0.001382 |
| 1Mar2011- | 3794  | 407.74  | 5.852463 | 2 R.ASDIAPIK chrX@1795   | 3.18E-10 | 0.008324 |
| 1Mar2011- | 18372 | 860.69  | 14.08015 | 4 R.FQSAAIG Splice@chr   | 1.59E-15 | 0        |
| 1Mar2011- | 15198 | 825.94  | -5.62306 | 2 _ .K+14.016 Splice@chr | 1.92E-12 | 0        |
| 1Mar2011- | 14331 | 722.45  | -4.95112 | 2 R.RK+14.01 Splice@chr  | 3.84E-10 | 0.009112 |
| 1Mar2011- | 7801  | 509.3   | -20.473  | 2 R.SSVIMLIV chr2@5767   | 1.25E-10 | 0.003078 |
| 1Mar2011- | 18475 | 1014.23 | -23.9214 | 3 R.KLMSLAV chr5@1141    | 1.64E-11 | 0        |
| 1Mar2011- | 13357 | 592.65  | 24.14055 | 3 K.DITLEVEA Splice@chr  | 3.79E-10 | 0.009112 |
| 1Mar2011- | 5397  | 533.82  | 16.26677 | 2 K.TNIYTILTI chr5@1329  | 3.78E-10 | 0.009112 |
| 1Mar2011- | 1040  | 665.38  | -3.2154  | 2 R.QLQM+1 chr5@7160     | 2.65E-10 | 0.005361 |
| 1Mar2011- | 18360 | 1147.25 | 13.44098 | 3 R.FQSAAIG Splice@chr   | 1.39E-16 | 0        |
| 1Mar2011- | 7748  | 509.3   | -20.473  | 2 R.SSVIMLIV chr2@5767   | 1.18E-10 | 0.00296  |
| 1Mar2011- | 2905  | 487.3   | 24.66358 | 2 K.LQTSNGL Splice@chr   | 4.17E-10 | 0.009939 |
| 1Mar2011- | 17213 | 805.46  | -26.0992 | 2 K.TPIFIPAP chr5@1861   | 4.22E-12 | 0        |
| 1Mar2011- | 4790  | 693.87  | -6.6949  | 2 V.ICVAVGD chr5@1063    | 2.21E-10 | 0.004377 |
| 1Mar2011- | 13092 | 888.97  | 20.94366 | 2 K.DITLEVEA Splice@chr  | 7.34E-16 | 0        |
| 1Mar2011- | 18807 | 783.75  | 7.307848 | 3 K.INWAVTI chr4@2890    | 1.38E-16 | 0        |
| 1Mar2011- | 13372 | 888.47  | 22.8338  | 2 K.DITLEVEA Splice@chr  | 3.07E-12 | 0        |
| 1Mar2011- | 14420 | 849.47  | -1.18638 | 2 R.LLELAPTC chr2@6685   | 8.71E-19 | 0        |
| 1Mar2011- | 13195 | 888.47  | 22.8338  | 2 K.DITLEVEA Splice@chr  | 2.49E-15 | 0        |
| 1Mar2011- | 13166 | 592.65  | 24.14055 | 3 K.DITLEVEA Splice@chr  | 8.85E-12 | 0        |
| 1Mar2011- | 11630 | 854.95  | 17.20129 | 2 _ .KSFEVAIC Splice@chr | 5.78E-20 | 0        |
| 1Mar2011- | 5778  | 1025.61 | -11.6755 | 1 K.LGLGSGL chr5@4945    | 1.16E-10 | 0.00296  |
| 1Mar2011- | 10240 | 833.91  | -7.14778 | 2 _ .IDM+15.5 chrX@3237  | 6.88E-11 | 0.001256 |
| 1Mar2011- | 7861  | 509.3   | -20.473  | 2 R.SSVIMLIV chr2@5767   | 2.23E-10 | 0.004377 |
| 1Mar2011- | 18810 | 1174.62 | 7.800997 | 2 K.INWAVTI chr4@2890    | 3.94E-20 | 0        |
| 1Mar2011- | 13324 | 888.47  | 22.8338  | 2 K.DITLEVEA Splice@chr  | 3.95E-13 | 0        |
| 1Mar2011- | 16751 | 1162.13 | 17.06615 | 2 K.YLGAYLL Splice@chr   | 4.75E-20 | 0        |
| 1Mar2011- | 18928 | 1040.89 | -5.8694  | 3 E.LFQIIVM+ chr2@1065   | 2.67E-10 | 0.006377 |
| 1Mar2011- | 18383 | 1147.25 | 13.44098 | 3 R.FQSAAIG Splice@chr   | 4.09E-17 | 0        |
| 1Mar2011- | 16519 | 1007.86 | 15.19559 | 3 R.CWNRRRA Splice@chr   | 2.71E-12 | 0        |
| 1Mar2011- | 9416  | 661.4   | -2.4954  | 2 K.LVLIAVN chr1@6528    | 1.95E-11 | 2.95E-04 |
| 1Mar2011- | 340   | 700.33  | -11.1714 | 1 R.ENPGAGI chr5@1375    | 4.01E-11 | 9.98E-04 |
| 1Mar2011- | 7559  | 1137.64 | -23.9488 | 1 Q.FLVISFA chrX@1232    | 1.37E-10 | 0.003199 |
| 1Mar2011- | 11269 | 622.33  | 9.587405 | 2 R.AK+14.01 chr2@4270   | 7.92E-11 | 0.001809 |
| 1Mar2011- | 5636  | 560.94  | -12.2507 | 3 _ .EMFSAAI chr4@3415   | 1.11E-10 | 0.002451 |
| 1Mar2011- | 5577  | 400.75  | 5.038673 | 2 K.VEA AVAI Splice@chr  | 9.66E-11 | 0.001929 |
| 1Mar2011- | 10807 | 780.03  | -24.5321 | 3 ?.AQDNYM Splice@chr    | 1.01E-10 | 0.002195 |

|           |       |         |          |                         |          |          |
|-----------|-------|---------|----------|-------------------------|----------|----------|
| 1Mar2011- | 14959 | 987.51  | 4.289691 | 3 K.KYLFLDNI chr4@1288  | 3.46E-10 | 0.00912  |
| 1Mar2011- | 4500  | 1025.61 | -11.6755 | 1 K.LGLGSGL chr5@4945   | 1.47E-11 | 9.31E-04 |
| 1Mar2011- | 18093 | 688.75  | 8.895763 | 5 R.FQSAAIG Splice@chr  | 1.91E-10 | 0.004336 |
| 1Mar2011- | 5088  | 563.33  | 22.46854 | 2 R.K+14.016 Splice@chr | 3.94E-10 | 0.009686 |
| 1Mar2011- | 15519 | 1007.86 | 15.19559 | 3 R.CWNRRRA Splice@chr  | 3.80E-10 | 0.009457 |
| 1Mar2011- | 8189  | 661.4   | -2.4954  | 2 K.LVLIAVN1 chr1@6528  | 1.28E-10 | 0.003111 |
| 1Mar2011- | 16511 | 805.47  | -13.7324 | 2 K.TPIFIPAP1 chr5@1861 | 3.39E-10 | 0.009015 |
| 1Mar2011- | 3885  | 533.82  | 16.26677 | 2 K.TNIYTILTI chr5@1329 | 3.01E-10 | 0.00742  |
| 1Mar2011- | 14629 | 1003.19 | 17.13413 | 3 R.CWNRRRA Splice@chr  | 1.20E-11 | 4.73E-04 |
| 1Mar2011- | 11851 | 888.47  | 22.8338  | 2 K.DITLEVEA Splice@chr | 1.23E-12 | 0        |
| 1Mar2011- | 14739 | 798.15  | -11.5616 | 4 K.SGDAGIV Splice@chr  | 1.03E-10 | 0.002195 |
| 1Mar2011- | 11629 | 888.97  | 20.94366 | 2 K.DITLEVEA Splice@chr | 4.02E-16 | 0        |
| 1Mar2011- | 13963 | 825.95  | 6.510915 | 2 _K+14.016 Splice@chr  | 5.47E-11 | 0.001418 |
| 1Mar2011- | 11795 | 888.97  | 20.94366 | 2 K.DITLEVEA Splice@chr | 4.16E-13 | 0        |
| 1Mar2011- | 5748  | 560.94  | -12.2507 | 3 _EMFSAA1 chr4@3419    | 7.91E-11 | 0.001809 |
| 1Mar2011- | 13383 | 946.96  | -27.9189 | 2 K.MWMNV Splice@chr    | 3.88E-11 | 0.001022 |
| 1Mar2011- | 8250  | 472.29  | -0.64754 | 2 _SPLFVPK1 chrX@4402   | 1.52E-10 | 0.003331 |
| 1Mar2011- | 6578  | 509.3   | -20.473  | 2 R.SSVIMLIV chr2@5767  | 7.61E-11 | 0.001809 |
| 1Mar2011- | 18729 | 780.92  | -5.16507 | 4 E.LFQIIVM1 chr2@1065  | 7.77E-11 | 0.001809 |
| 1Mar2011- | 18704 | 1040.9  | 3.834672 | 3 E.LFQIIVM1 chr2@1065  | 3.72E-10 | 0.009338 |
| 1Mar2011- | 9631  | 556.85  | 26.98454 | 2 R.NKEPNLII chr2@8282  | 1.62E-10 | 0.003723 |
| 1Mar2011- | 13893 | 732.07  | 19.51873 | 3 R.ATDDWII Splice@chr  | 2.38E-10 | 0.005841 |
| 1Mar2011- | 10658 | 664.7   | 1.197202 | 3 _PTLNK+1 chr1@6526    | 1.98E-10 | 0.004465 |
| 1Mar2011- | 3998  | 533.82  | 16.26677 | 2 K.TNIYTILTI chr5@1329 | 3.12E-10 | 0.008418 |
| 1Mar2011- | 12967 | 848.97  | 0.791766 | 2 R.LLELAPTC chr2@6685  | 6.59E-15 | 0        |
| 1Mar2011- | 11739 | 888.97  | 20.94366 | 2 K.DITLEVEA Splice@chr | 5.06E-15 | 0        |
| 1Mar2011- | 3484  | 693.87  | -6.6949  | 2 V.ICVAVGD chr5@1063   | 1.67E-10 | 0.00397  |
| 1Mar2011- | 11577 | 888.47  | 22.8338  | 2 K.DITLEVEA Splice@chr | 5.96E-16 | 0        |
| 1Mar2011- | 11685 | 888.47  | 22.8338  | 2 K.DITLEVEA Splice@chr | 5.61E-15 | 0        |
| 1Mar2011- | 4446  | 1025.62 | -1.90621 | 1 K.LGLGSGL chr5@4945   | 1.17E-11 | 4.73E-04 |
| 1Mar2011- | 17806 | 929.16  | -18.1332 | 3 R.KSTAKLK1 chr2@8593  | 1.55E-10 | 0.003331 |
| 1Mar2011- | 16375 | 805.97  | -15.8175 | 2 K.TPIFIPAP1 chr5@1861 | 1.84E-10 | 0.004336 |
| 1Mar2011- | 13018 | 848.97  | 0.791766 | 2 R.LLELAPTC chr2@6685  | 5.35E-18 | 0        |
| 1Mar2011- | 18069 | 1147.24 | 4.705638 | 3 R.FQSAAIG Splice@chr  | 1.12E-15 | 0        |
| 1Mar2011- | 11843 | 592.98  | 16.54196 | 3 K.DITLEVEA Splice@chr | 5.59E-11 | 0.001418 |
| 1Mar2011- | 11577 | 888.47  | 22.8338  | 2 K.DITLEVEA Splice@chr | 2.20E-15 | 0        |
| 1Mar2011- | 11766 | 888.47  | 22.8338  | 2 K.DITLEVEA Splice@chr | 2.29E-13 | 0        |
| 1Mar2011- | 16517 | 678.86  | -16.6575 | 2 K.QRSRPVII chr5@8132  | 1.26E-10 | 0.004413 |
| 1Mar2011- | 10826 | 780.03  | -24.5321 | 3 ?.AQDNYM Splice@chr   | 1.30E-11 | 0        |
| 1Mar2011- | 13292 | 1167.55 | -25.3067 | 2 L.K+14.016 Splice@chr | 3.03E-11 | 0.001254 |
| 1Mar2011- | 4088  | 533.82  | 16.26677 | 2 K.TNIYTILTI chr5@1329 | 1.29E-10 | 0.004571 |
| 1Mar2011- | 11534 | 965.77  | 16.46969 | 4 R.K+14.016 chr5@2085  | 8.97E-11 | 0.003644 |
| 1Mar2011- | 11816 | 888.47  | 22.8338  | 2 K.DITLEVEA Splice@chr | 1.07E-12 | 0        |
| 1Mar2011- | 17189 | 860.69  | 14.08015 | 4 R.FQSAAIG Splice@chr  | 1.44E-15 | 0        |
| 1Mar2011- | 17198 | 688.75  | 8.895763 | 5 R.FQSAAIG Splice@chr  | 8.34E-12 | 0        |
| 1Mar2011- | 17196 | 1147.25 | 13.44098 | 3 R.FQSAAIG Splice@chr  | 6.92E-16 | 0        |
| 1Mar2011- | 17175 | 860.69  | 14.08015 | 4 R.FQSAAIG Splice@chr  | 4.55E-13 | 0        |

|           |       |         |          |                         |          |          |
|-----------|-------|---------|----------|-------------------------|----------|----------|
| 1Mar2011- | 6441  | 509.3   | -20.473  | 2 R.SSVIMLIV chr2@5767  | 5.41E-11 | 0.002063 |
| 1Mar2011- | 11626 | 888.47  | 22.8338  | 2 K.DITLEVEA Splice@chr | 1.03E-15 | 0        |
| 1Mar2011- | 16757 | 1096.89 | 6.757706 | 3 K.DKPFFPSI Splice@chr | 4.00E-12 | 0        |
| 1Mar2011- | 6552  | 509.3   | -20.473  | 2 R.SSVIMLIV chr2@5767  | 7.39E-11 | 0.00305  |
| 1Mar2011- | 5166  | 496.3   | 9.488848 | 2 R.EIKLFDVK Splice@chr | 2.61E-10 | 0.009311 |
| 1Mar2011- | 15199 | 581.57  | 18.95936 | 4 K.YLGAYLL Splice@chr  | 2.62E-12 | 0        |
| 1Mar2011- | 4307  | 533.82  | 16.26677 | 2 K.TNIYTILTI chr5@1329 | 1.67E-10 | 0.006564 |
| 1Mar2011- | 4305  | 563.33  | 22.46854 | 2 R.K+14.016 Splice@chr | 2.30E-10 | 0.008133 |
| 1Mar2011- | 10883 | 780.03  | -24.5321 | 3 ?.AQDNYM Splice@chr   | 2.32E-11 | 9.15E-04 |
| 1Mar2011- | 5725  | 560.61  | -4.36273 | 3 _EMFSAA\ chr4@3419    | 3.60E-11 | 0.001579 |
| 1Mar2011- | 13306 | 899.47  | 5.842265 | 2 R.SKNK+14 chrX@1700   | 1.61E-10 | 0.006413 |
| 1Mar2011- | 6494  | 509.3   | -20.473  | 2 R.SSVIMLIV chr2@5767  | 6.52E-11 | 0.002732 |
| 1Mar2011- | 9861  | 838.94  | -22.1914 | 2 R.QFADLPS chr5@1898   | 2.31E-10 | 0.00828  |
| 1Mar2011- | 16972 | 929.15  | -28.8338 | 3 R.KSTAKLK! chr2@8593  | 6.40E-11 | 0.002394 |
| 1Mar2011- | 11657 | 592.65  | 24.14055 | 3 K.DITLEVEA Splice@chr | 1.25E-11 | 0        |
| 1Mar2011- | 6521  | 1017.59 | -22.5744 | 1 R.SSVIMLIV chr2@5767  | 1.88E-11 | 7.40E-04 |
| 1Mar2011- | 11677 | 888.97  | 20.94366 | 2 K.DITLEVEA Splice@chr | 3.91E-16 | 0        |
| 1Mar2011- | 173   | 665.38  | -3.2154  | 2 R.QLQM+1 chr5@7160    | 1.61E-10 | 0.006413 |
| 1Mar2011- | 12867 | 848.97  | 0.791766 | 2 R.LLELAPTC chr2@6685  | 8.86E-16 | 0        |
| 1Mar2011- | 17743 | 987.55  | 1.641421 | 2 K.EMINALS chr4@1164   | 1.84E-11 | 7.40E-04 |
| 1Mar2011- | 16689 | 1096.89 | 6.757706 | 3 K.DKPFFPSI Splice@chr | 3.26E-12 | 0        |
| 1Mar2011- | 13641 | 825.95  | 6.510915 | 2 _K+14.016 Splice@chr  | 3.16E-11 | 0.001254 |
| 1Mar2011- | 17625 | 1175.12 | 6.371728 | 2 K.INWAVTI chr4@2890   | 7.03E-18 | 0        |
| 1Mar2011- | 3595  | 693.87  | -6.6949  | 2 V.ICVAVGD chr5@1063   | 1.51E-10 | 0.005792 |
| 1Mar2011- | 10801 | 592.65  | 24.14055 | 3 K.DITLEVEA Splice@chr | 2.16E-12 | 0        |
| 1Mar2011- | 16663 | 1175.12 | 6.371728 | 2 K.INWAVTI chr4@2890   | 1.76E-22 | 0        |
| 1Mar2011- | 195   | 665.38  | -3.2154  | 2 R.QLQM+1 chr5@7160    | 5.23E-11 | 0.00165  |
| 1Mar2011- | 15769 | 1097.22 | 2.692596 | 3 K.DKPFFPSI Splice@chr | 4.06E-12 | 1.97E-04 |
| 1Mar2011- | 16276 | 860.69  | 14.08015 | 4 R.FQSAAIG Splice@chr  | 5.90E-13 | 0        |
| 1Mar2011- | 1517  | 439.91  | -18.8195 | 3 R.NSYNGLF chr4@9687   | 6.30E-11 | 0.002312 |
| 1Mar2011- | 13912 | 1097.22 | 2.692596 | 3 K.DKPFFPSI Splice@chr | 6.89E-11 | 0.002312 |
| 1Mar2011- | 1578  | 439.91  | -18.8195 | 3 R.NSYNGLF chr4@9687   | 2.59E-10 | 0.006885 |
| 1Mar2011- | 16050 | 929.16  | -18.1332 | 3 R.KSTAKLK! chr2@8593  | 4.65E-11 | 0.001109 |
| 1Mar2011- | 10930 | 888.47  | 22.8338  | 2 K.DITLEVEA Splice@chr | 1.32E-14 | 0        |
| 1Mar2011- | 10878 | 888.47  | 22.8338  | 2 K.DITLEVEA Splice@chr | 1.15E-15 | 0        |
| 1Mar2011- | 12085 | 848.97  | 0.791766 | 2 R.LLELAPTC chr2@6685  | 1.03E-16 | 0        |
| 1Mar2011- | 10100 | 780.03  | -24.5321 | 3 ?.AQDNYM Splice@chr   | 6.20E-12 | 1.97E-04 |
| 1Mar2011- | 4036  | 533.82  | 16.26677 | 2 K.TNIYTILTI chr5@1329 | 3.43E-10 | 0.009476 |
| 1Mar2011- | 10981 | 888.47  | 22.8338  | 2 K.DITLEVEA Splice@chr | 3.26E-13 | 0        |
| 1Mar2011- | 15740 | 1096.89 | 6.757706 | 3 K.DKPFFPSI Splice@chr | 4.20E-12 | 1.97E-04 |
| 1Mar2011- | 10779 | 888.47  | 22.8338  | 2 K.DITLEVEA Splice@chr | 4.11E-16 | 0        |
| 1Mar2011- | 15842 | 1096.89 | 6.757706 | 3 K.DKPFFPSI Splice@chr | 1.27E-10 | 0.003957 |
| 1Mar2011- | 4200  | 533.82  | 16.26677 | 2 K.TNIYTILTI chr5@1329 | 1.33E-10 | 0.00445  |
| 1Mar2011- | 13694 | 987.51  | 4.289691 | 3 K.KYLFLDNI chr4@1288  | 1.82E-10 | 0.005838 |
| 1Mar2011- | 10722 | 888.47  | 22.8338  | 2 K.DITLEVEA Splice@chr | 1.29E-14 | 0        |
| 1Mar2011- | 14963 | 805.47  | -13.7324 | 2 K.TPIFIPAP! chr5@1861 | 2.91E-10 | 0.007625 |
| 1Mar2011- | 11055 | 592.65  | 24.14055 | 3 K.DITLEVEA Splice@chr | 3.15E-10 | 0.007911 |

|           |       |         |          |                         |          |          |
|-----------|-------|---------|----------|-------------------------|----------|----------|
| 1Mar2011- | 14031 | 987.51  | 4.289691 | 3 K.KYLFLDNI chr4@1288  | 1.75E-10 | 0.005537 |
| 1Mar2011- | 11035 | 888.47  | 22.8338  | 2 K.DITLEVEA Splice@chr | 3.85E-12 | 1.97E-04 |
| 1Mar2011- | 12978 | 825.94  | -5.62306 | 2 _K+14.016 Splice@chr  | 2.82E-11 | 9.49E-04 |
| 1Mar2011- | 13888 | 1003.19 | 17.13413 | 3 R.CWNRRRA Splice@chr  | 3.28E-13 | 0        |
| 1Mar2011- | 6343  | 509.3   | -20.473  | 2 R.SSVIMLIV chr2@5767  | 1.35E-10 | 0.00445  |
| 1Mar2011- | 10826 | 888.47  | 22.8338  | 2 K.DITLEVEA Splice@chr | 9.72E-16 | 0        |
| 1Mar2011- | 16815 | 1040.89 | -5.8694  | 3 E.LFQIIVM+ chr2@1065  | 3.07E-10 | 0.007776 |
| 1Mar2011- | 16701 | 801.9   | -20.3474 | 2 K.SMRKRGI chrX@1525   | 5.19E-12 | 1.97E-04 |
| 1Mar2011- | 13225 | 888.97  | 20.94366 | 2 K.DITLEVEA Splice@chr | 3.06E-12 | 0        |
| 1Mar2011- | 5161  | 533.82  | 16.26677 | 2 K.TNIYTILTI chr5@1329 | 3.50E-10 | 0.008719 |
| 1Mar2011- | 13038 | 888.47  | 22.8338  | 2 K.DITLEVEA Splice@chr | 1.26E-14 | 0        |
| 1Mar2011- | 3929  | 489.28  | 28.87637 | 2 R.RGTASRS chr5@1951   | 5.79E-12 | 1.42E-04 |
| 1Mar2011- | 16981 | 581.32  | 20.40464 | 4 K.YLGAYLL+ Splice@chr | 5.36E-12 | 1.42E-04 |
| 1Mar2011- | 19599 | 828.39  | -8.00743 | 2 K.PNLK+14 chr2@3862   | 2.73E-10 | 0.007176 |
| 1Mar2011- | 2059  | 439.91  | 17.33685 | 3 K.NSQKNPI chr2@3540   | 4.12E-11 | 0.001015 |
| 1Mar2011- | 6714  | 431.74  | 5.455516 | 2 _PIQDVYK Splice@chr   | 3.00E-10 | 0.007474 |
| 1Mar2011- | 18332 | 968.13  | 18.26018 | 3 _GCSIVPIS Splice@chr  | 1.50E-10 | 0.003727 |
| 1Mar2011- | 4786  | 439.91  | 17.33685 | 3 K.NSQKNPI chr2@3540   | 8.93E-11 | 0.002404 |
| 1Mar2011- | 16091 | 1063.86 | -15.3899 | 3 K.SGDAGIV Splice@chr  | 1.47E-11 | 4.00E-04 |
| 1Mar2011- | 6989  | 444.91  | 23.28334 | 3 K.CTLINELN Splice@chr | 2.92E-10 | 0.007367 |
| 1Mar2011- | 12627 | 490.74  | -7.60235 | 2 K.DITMEIM chr3@1481   | 4.14E-10 | 0.009418 |
| 1Mar2011- | 5521  | 1025.61 | -11.6755 | 1 K.LGLGSGL chr5@4945   | 1.01E-11 | 2.74E-04 |
| 1Mar2011- | 14355 | 849.48  | 10.61812 | 2 R.LLELAPTC chr2@6685  | 1.09E-18 | 0        |
| 1Mar2011- | 13171 | 888.97  | 20.94366 | 2 K.DITLEVEA Splice@chr | 1.46E-12 | 0        |
| 1Mar2011- | 16132 | 798.15  | -11.5616 | 4 K.SGDAGIV Splice@chr  | 1.53E-10 | 0.003829 |
| 1Mar2011- | 5287  | 534.32  | 13.11853 | 2 K.TNIYTILTI chr5@1329 | 3.87E-10 | 0.009225 |
| 1Mar2011- | 8084  | 512.28  | -21.6995 | 3 K.KVQNHSL chr5@4515   | 3.06E-10 | 0.007691 |
| 1Mar2011- | 17223 | 956.54  | 23.72556 | 1 K.ISLVFDVY chrX@7831  | 2.53E-10 | 0.006305 |
| 1Mar2011- | 12930 | 965.77  | 16.46969 | 4 R.KTSSCQK chr5@2085   | 3.70E-10 | 0.009027 |
| 1Mar2011- | 8021  | 512.28  | -21.6995 | 3 K.KVQNHSL chr5@4515   | 1.17E-10 | 0.002955 |
| 1Mar2011- | 6603  | 975.55  | -13.0268 | 1 K.LPKLDAYI chr4@1149  | 1.40E-10 | 0.003505 |
| 1Mar2011- | 15245 | 826.45  | 4.477555 | 2 _K+14.016 Splice@chr  | 1.16E-11 | 2.74E-04 |
| 1Mar2011- | 15828 | 812.11  | 2.033465 | 3 A.EITEMLP+ Splice@chr | 1.77E-10 | 0.004143 |
| 1Mar2011- | 20105 | 760.41  | 9.033528 | 3 _TQTNTKI+ chrX@7978   | 2.49E-11 | 5.23E-04 |
| 1Mar2011- | 13353 | 826.45  | 4.477555 | 2 _K+14.016 Splice@chr  | 2.35E-10 | 0.005758 |
| 1Mar2011- | 17384 | 1027.49 | -10.2945 | 1 _KLMNMM chr5@5468     | 8.88E-11 | 0.002404 |
| 1Mar2011- | 6758  | 862.47  | 2.904885 | 1 _PIQDVYK Splice@chr   | 1.86E-10 | 0.004582 |
| 1Mar2011- | 6553  | 975.55  | -13.0268 | 1 K.LPKLDAYI chr4@1149  | 1.51E-10 | 0.003829 |
| 1Mar2011- | 8430  | 825.46  | -13.1033 | 2 R.SARENKT Splice@chr  | 3.46E-10 | 0.008618 |
| 1Mar2011- | 12043 | 938.46  | 22.50833 | 2 R.ECSQSDS chr2@8876   | 2.85E-10 | 0.007267 |
| 1Mar2011- | 12060 | 664.7   | 1.197202 | 3 _PTLNK+1. chr1@6526   | 8.78E-11 | 0.002404 |
| 1Mar2011- | 207   | 422.24  | -14.1272 | 2 R.KVHGFAC chr4@4031   | 3.25E-11 | 6.43E-04 |
| 1Mar2011- | 19311 | 860.69  | 14.08015 | 4 R.FQSAAIG Splice@chr  | 3.48E-15 | 0        |
| 1Mar2011- | 9762  | 671.37  | -24.0361 | 2 T.FNIVHTQ Splice@chr  | 4.33E-10 | 0.009943 |
| 1Mar2011- | 12002 | 664.7   | 1.197202 | 3 _PTLNK+1. chr1@6526   | 2.94E-10 | 0.007367 |
| 1Mar2011- | 5344  | 534.32  | 13.11853 | 2 K.TNIYTILTI chr5@1329 | 3.65E-10 | 0.009027 |
| 1Mar2011- | 20047 | 1040.9  | 3.834672 | 3 E.LFQIIVM+ chr2@1065  | 4.32E-11 | 0.001128 |

|           |       |         |          |                         |          |          |
|-----------|-------|---------|----------|-------------------------|----------|----------|
| 1Mar2011- | 1342  | 562.31  | -13.4391 | 2 R.FYLLYLYK Splice@chr | 5.56E-11 | 0.001614 |
| 1Mar2011- | 17980 | 980.48  | -7.04314 | 3 K.SGTIFDNI Splice@chr | 3.63E-10 | 0.008928 |
| 1Mar2011- | 4843  | 439.91  | 17.33685 | 3 K.NSQKNPI chr2@3540   | 3.99E-10 | 0.009319 |
| 1Mar2011- | 6660  | 431.74  | 5.455516 | 2 _PIQDVYK Splice@chr   | 1.80E-10 | 0.004253 |
| 1Mar2011- | 8252  | 886     | 3.172487 | 2 F.ENVVEVII Splice@chr | 8.05E-12 | 1.42E-04 |
| 1Mar2011- | 14774 | 946.96  | -27.9189 | 2 K.MWMNV Splice@chr    | 3.70E-10 | 0.009124 |
| 1Mar2011- | 17713 | 634.84  | 6.410455 | 2 R.VDIGDILF Splice@chr | 1.56E-12 | 0        |
| 1Mar2011- | 5746  | 1025.61 | -11.6755 | 1 K.LGLGSGI chr5@4945   | 1.96E-11 | 4.00E-04 |
| 1Mar2011- | 20012 | 987.54  | -8.51007 | 2 K.EMINALS chr4@1164   | 1.40E-10 | 0.003505 |
| 1Mar2011- | 14249 | 722.45  | -4.95112 | 2 R.RK+14.01 Splice@chr | 2.32E-10 | 0.005656 |
| 1Mar2011- | 14832 | 946.46  | -26.1447 | 2 K.MWMNV Splice@chr    | 2.58E-10 | 0.006519 |
| 1Mar2011- | 12154 | 780.03  | -24.5321 | 3 ?.AQDNYM Splice@chr   | 8.85E-11 | 0.002404 |
| 1Mar2011- | 2020  | 439.91  | 17.33685 | 3 K.NSQKNPI chr2@3540   | 6.91E-12 | 1.42E-04 |
| 1Mar2011- | 19188 | 962.8   | 16.16136 | 3 _CSIRPISG Splice@chr  | 4.17E-11 | 0.001015 |
| 1Mar2011- | 12573 | 490.74  | -7.60235 | 2 K.DITMEIM chr3@1481   | 2.29E-10 | 0.005656 |
| 1Mar2011- | 1308  | 562.31  | -13.4391 | 2 R.FYLLYLYK Splice@chr | 5.70E-11 | 0.001614 |
| 1Mar2011- | 6206  | 1063.58 | 1.14882  | 1 K.YLINGNEI chr1@8687  | 3.84E-10 | 0.009124 |
| 1Mar2011- | 1463  | 562.31  | -13.4391 | 2 R.FYLLYLYK Splice@chr | 8.51E-11 | 0.002404 |
| 1Mar2011- | 20001 | 1040.9  | 3.834672 | 3 E.LFQIIVM+ chr2@1065  | 1.36E-10 | 0.003505 |
| 1Mar2011- | 16251 | 987.51  | 4.289691 | 3 K.KYLFLDNI chr4@1288  | 2.67E-10 | 0.007176 |
| 1Mar2011- | 5104  | 862.47  | 2.904885 | 1 _PIQDVYK Splice@chr   | 1.80E-10 | 0.003904 |
| 1Mar2011- | 18231 | 929.16  | -18.1332 | 3 R.KSTAKLK+ chr2@8595  | 2.61E-10 | 0.005123 |
| 1Mar2011- | 3434  | 534.32  | 13.11853 | 2 K.TNIYTILTI chr5@1329 | 2.75E-10 | 0.005932 |
| 1Mar2011- | 18702 | 860.69  | 14.08015 | 4 R.FQSAAIG Splice@chr  | 6.06E-15 | 0        |
| 1Mar2011- | 2244  | 489.28  | 28.87637 | 2 R.RGTASRS chr5@1951   | 4.45E-12 | 0        |
| 1Mar2011- | 16576 | 965.54  | -8.8309  | 2 F.FLRQIRQI chr4@3226  | 7.92E-11 | 0.001664 |
| 1Mar2011- | 3991  | 1025.61 | -11.6755 | 1 K.LGLGSGI chr5@4945   | 5.65E-12 | 0        |
| 1Mar2011- | 5044  | 975.56  | -2.75567 | 1 K.LPKLDAYI chr4@1149  | 1.16E-10 | 0.002515 |
| 1Mar2011- | 14089 | 732.07  | 19.51873 | 3 R.ATDDWII Splice@chr  | 2.27E-10 | 0.004925 |
| 1Mar2011- | 12923 | 722.45  | -4.95112 | 2 R.RK+14.01 chr1@1875  | 4.89E-10 | 0.009922 |
| 1Mar2011- | 8117  | 833.42  | -4.62234 | 1 K.HEVTVFT chr4@1317   | 3.20E-10 | 0.006921 |
| 1Mar2011- | 5397  | 400.75  | 5.038673 | 2 K.VEA AVAI Splice@chr | 4.68E-11 | 9.27E-04 |
| 1Mar2011- | 16797 | 805.97  | -15.8175 | 2 K.TPIFIPAP+ chr5@1861 | 4.54E-10 | 0.008937 |
| 1Mar2011- | 6905  | 825.47  | -1.03642 | 2 R.SARENKT Splice@chr  | 4.67E-10 | 0.009152 |
| 1Mar2011- | 8410  | 724.06  | 2.506414 | 3 R.NELEVFK chr1@1385   | 7.44E-11 | 0.001664 |
| 1Mar2011- | 2288  | 489.28  | 28.87637 | 2 R.RGTASRS chr5@1951   | 1.15E-10 | 0.002515 |
| 1Mar2011- | 6534  | 897.42  | -27.6753 | 3 _QVREMH Splice@chr    | 1.72E-10 | 0.003794 |
| 1Mar2011- | 4987  | 862.47  | 2.904885 | 1 _PIQDVYK Splice@chr   | 1.80E-10 | 0.003904 |
| 1Mar2011- | 4986  | 975.56  | -2.75567 | 1 K.LPKLDAYI chr4@1149  | 3.81E-11 | 8.07E-04 |
| 1Mar2011- | 4049  | 1025.61 | -11.6755 | 1 K.LGLGSGI chr5@4945   | 6.04E-12 | 0        |
| 1Mar2011- | 11724 | 888.97  | 20.94366 | 2 K.DITLEVEA Splice@chr | 3.07E-12 | 0        |
| 1Mar2011- | 15175 | 987.51  | 4.289691 | 3 K.KYLFLDNI chr4@1288  | 3.58E-10 | 0.007793 |
| 1Mar2011- | 5093  | 431.74  | 5.455516 | 2 _PIQDVYK Splice@chr   | 1.85E-10 | 0.003904 |
| 1Mar2011- | 3494  | 534.32  | 13.11853 | 2 K.TNIYTILTI chr5@1329 | 2.28E-10 | 0.004925 |
| 1Mar2011- | 7675  | 657.04  | -26.9179 | 3 R.GNVRK+1 chrX@7490   | 2.34E-10 | 0.005015 |
| 1Mar2011- | 3612  | 533.82  | 16.26677 | 2 K.TNIYTILTI chr5@1329 | 2.57E-10 | 0.005123 |
| 1Mar2011- | 15797 | 1007.87 | 25.05656 | 3 R.CWNRRRA Splice@chr  | 2.53E-11 | 8.07E-04 |

|           |       |         |          |                         |          |          |
|-----------|-------|---------|----------|-------------------------|----------|----------|
| 1Mar2011- | 243   | 665.39  | 11.85105 | 2 R.QLQM+1 chr5@7160    | 2.68E-10 | 0.005932 |
| 1Mar2011- | 12215 | 909.47  | 26.37016 | 3 R.K+14.016 chrX@1516  | 2.68E-10 | 0.005932 |
| 1Mar2011- | 501   | 562.31  | -13.4391 | 2 R.FYLLYLYK Splice@chr | 6.35E-11 | 0.001176 |
| 1Mar2011- | 15720 | 694.87  | 2.550973 | 2 K.YHNITLQ chrX@3836   | 4.37E-10 | 0.008831 |
| 1Mar2011- | 714   | 665.39  | 11.85105 | 2 R.QLQM+1 chr5@7160    | 1.80E-10 | 0.003904 |
| 1Mar2011- | 16737 | 634.84  | 6.410455 | 2 R.VDIGDILF Splice@chr | 2.95E-12 | 0        |
| 1Mar2011- | 6197  | 1017.59 | -22.5744 | 1 R.SSVIMLIV chr2@5767  | 2.03E-10 | 0.004367 |
| 1Mar2011- | 5340  | 400.75  | 5.038673 | 2 K.VEAATAI Splice@chr  | 7.56E-11 | 0.001664 |
| 1Mar2011- | 10591 | 664.7   | 1.197202 | 3 _PTLNK+1 chr1@6526    | 1.37E-10 | 0.00324  |
| 1Mar2011- | 14048 | 825.95  | 6.510915 | 2 _K+14.016 Splice@chr  | 1.18E-10 | 0.002515 |
| 1Mar2011- | 14927 | 1003.19 | 17.13413 | 3 R.CWNRRA Splice@chr   | 8.90E-13 | 0        |
| 1Mar2011- | 13072 | 848.97  | 0.791766 | 2 R.LLELAPTC chr2@6685  | 6.63E-16 | 0        |
| 1Mar2011- | 11049 | 622.33  | 9.587405 | 2 R.AK+14.01 chr2@4270  | 1.37E-10 | 0.00324  |
| 1Mar2011- | 16774 | 634.84  | 6.410455 | 2 R.VDIGDILF Splice@chr | 1.42E-12 | 0        |
| 1Mar2011- | 2252  | 626.3   | -9.76097 | 2 R.LCESGAA Splice@chr  | 9.96E-16 | 0        |
| 1Mar2011- | 3257  | 533.82  | 16.26677 | 2 K.TNIYTILTI chr5@1325 | 4.11E-10 | 0.008306 |
| 1Mar2011- | 16445 | 1027.49 | -10.2945 | 1 _KLMNMM chr5@5468     | 2.82E-10 | 0.006152 |
| 1Mar2011- | 3938  | 1025.62 | -1.90621 | 1 K.LGLGSGL chr5@4945   | 5.11E-12 | 0        |
| 1Mar2011- | 18721 | 1147.25 | 13.44098 | 3 R.FQSAAIG Splice@chr  | 1.92E-13 | 0        |
| 1Mar2011- | 6237  | 509.3   | -20.473  | 2 R.SSVIMLIV chr2@5767  | 9.52E-11 | 0.00204  |
| 1Mar2011- | 3667  | 533.82  | 16.26677 | 2 K.TNIYTILTI chr5@1325 | 4.78E-10 | 0.009699 |
| 1Mar2011- | 17359 | 968.13  | 18.26018 | 3 _GCSIVPIS Splice@chr  | 4.16E-11 | 8.07E-04 |
| 1Mar2011- | 8502  | 516.29  | 9.357636 | 2 K.VSVDVLE chrX@1218   | 2.51E-10 | 0.005015 |
| 1Mar2011- | 13534 | 742.88  | -6.21424 | 2 K.M+15.99 chr4@1648   | 3.54E-10 | 0.007793 |
| 1Mar2011- | 11009 | 490.74  | -7.60235 | 2 K.DITMEIM chr3@1481   | 3.03E-10 | 0.006481 |
| 1Mar2011- | 15770 | 694.87  | 2.550973 | 2 K.YHNITLQ chrX@3836   | 4.58E-10 | 0.009045 |
| 1Mar2011- | 18052 | 980.48  | -7.04314 | 3 K.SGTIFDNI Splice@chr | 4.04E-10 | 0.008306 |
| 1Mar2011- | 6183  | 509.3   | -20.473  | 2 R.SSVIMLIV chr2@5767  | 5.12E-11 | 9.27E-04 |
| 1Mar2011- | 4969  | 431.74  | 5.455516 | 2 _PIQDVYK Splice@chr   | 4.14E-10 | 0.008404 |
| 1Mar2011- | 15840 | 1007.86 | 15.19559 | 3 R.CWNRRA Splice@chr   | 2.40E-11 | 8.07E-04 |
| 1Mar2011- | 5173  | 1025.61 | -11.6755 | 1 K.LGLGSGL chr5@4945   | 1.07E-10 | 0.002852 |
| 1Mar2011- | 14376 | 848.97  | 0.791766 | 2 R.LLELAPTC chr2@6685  | 1.83E-20 | 0        |
| 1Mar2011- | 12928 | 888.97  | 20.94366 | 2 K.DITLEVEA Splice@chr | 5.48E-15 | 0        |
| 1Mar2011- | 20282 | 780.92  | -5.16507 | 4 E.LFQIIVM+ chr2@1065  | 9.64E-11 | 0.002752 |
| 1Mar2011- | 19330 | 1147.24 | 4.705638 | 3 R.FQSAAIG Splice@chr  | 1.33E-14 | 0        |
| 1Mar2011- | 14325 | 848.97  | 0.791766 | 2 R.LLELAPTC chr2@6685  | 1.93E-16 | 0        |
| 1Mar2011- | 2143  | 439.91  | 17.33685 | 3 K.NSQKNPI chr2@3540   | 1.51E-10 | 0.003902 |
| 1Mar2011- | 10651 | 556.85  | 26.98454 | 2 R.NKEPNLII chr2@8282  | 2.26E-10 | 0.005589 |
| 1Mar2011- | 7414  | 1017.59 | -22.5744 | 1 R.SSVIMLIV chr2@5767  | 2.57E-10 | 0.006013 |
| 1Mar2011- | 10703 | 556.85  | 26.98454 | 2 R.NKEPNLII chr2@8282  | 4.04E-10 | 0.009566 |
| 1Mar2011- | 14831 | 1167.55 | -25.3067 | 2 L.K+14.016 Splice@chr | 7.03E-14 | 0        |
| 1Mar2011- | 3093  | 564.32  | -22.6447 | 2 K.IFVLKHEM chr5@1811  | 2.41E-10 | 0.006013 |
| 1Mar2011- | 20045 | 783.75  | 7.307848 | 3 K.INWAVTI chr4@2890   | 1.12E-16 | 0        |
| 1Mar2011- | 17135 | 581.57  | 18.95936 | 4 K.YLGAYLL/ Splice@chr | 2.91E-15 | 0        |
| 1Mar2011- | 15174 | 732.07  | 19.51873 | 3 R.ATDDWII Splice@chr  | 1.57E-10 | 0.004009 |
| 1Mar2011- | 5028  | 533.82  | 16.26677 | 2 K.TNIYTILTI chr5@1325 | 1.77E-10 | 0.004351 |
| 1Mar2011- | 15228 | 732.07  | 19.51873 | 3 R.ATDDWII Splice@chr  | 3.82E-10 | 0.009133 |

|           |       |         |          |                         |          |          |
|-----------|-------|---------|----------|-------------------------|----------|----------|
| 1Mar2011- | 4042  | 693.86  | -21.1418 | 2 V.ICVAVGD chr5@1063   | 7.36E-11 | 0.002294 |
| 1Mar2011- | 2999  | 936.48  | 27.86052 | 1 K.LNGGYEC chr2@1191   | 4.53E-11 | 0.001179 |
| 1Mar2011- | 11413 | 854.95  | 17.20129 | 2 _K.SFEVAIE Splice@chr | 1.73E-11 | 4.18E-04 |
| 1Mar2011- | 9108  | 661.4   | -2.4954  | 2 K.LVLIAVN1 chr1@6528  | 3.16E-10 | 0.007707 |
| 1Mar2011- | 4142  | 693.86  | -21.1418 | 2 V.ICVAVGD chr5@1063   | 2.28E-11 | 5.48E-04 |
| 1Mar2011- | 7396  | 509.3   | -20.473  | 2 R.SSVIMLIV chr2@5767  | 1.47E-10 | 0.003787 |
| 1Mar2011- | 19374 | 860.69  | 14.08015 | 4 R.FQSAAIG Splice@chr  | 2.11E-15 | 0        |
| 1Mar2011- | 19780 | 828.39  | -8.00743 | 2 K.PNLK+14 chr2@3862   | 7.28E-11 | 0.002294 |
| 1Mar2011- | 14882 | 1167.55 | -25.3067 | 2 L.K+14.016 Splice@chr | 7.33E-13 | 0        |
| 1Mar2011- | 7474  | 1017.59 | -22.5744 | 1 R.SSVIMLIV chr2@5767  | 2.12E-10 | 0.005589 |
| 1Mar2011- | 13035 | 888.47  | 22.8338  | 2 K.DITLEVEA Splice@chr | 2.68E-15 | 0        |
| 1Mar2011- | 20044 | 1175.12 | 6.371728 | 2 K.INWAVTI chr4@2890   | 5.72E-23 | 0        |
| 1Mar2011- | 19058 | 1147.25 | 13.44098 | 3 R.FQSAAIG Splice@chr  | 1.83E-13 | 0        |
| 1Mar2011- | 19639 | 1097.22 | 2.692596 | 3 K.DKPFPSI Splice@chr  | 1.55E-11 | 2.80E-04 |
| 1Mar2011- | 20063 | 1175.11 | -2.15736 | 2 K.INWAVTI chr4@2890   | 2.32E-20 | 0        |
| 1Mar2011- | 8050  | 885.99  | -8.13812 | 2 F.ENVVEVII Splice@chr | 2.20E-12 | 0        |
| 1Mar2011- | 15289 | 826.44  | -7.65642 | 2 _K+14.016 Splice@chr  | 5.51E-11 | 0.001812 |
| 1Mar2011- | 4632  | 533.82  | 16.26677 | 2 K.TNIYTILTI chr5@1329 | 3.43E-10 | 0.008142 |
| 1Mar2011- | 1209  | 915.47  | 1.201399 | 1 K.FHEIGGQ chrX@4727   | 1.40E-10 | 0.003787 |
| 1Mar2011- | 13129 | 888.47  | 22.8338  | 2 K.DITLEVEA Splice@chr | 5.87E-13 | 0        |
| 1Mar2011- | 17497 | 957.5   | 22.57714 | 3 K.LFQVLQN Splice@chr  | 8.80E-12 | 1.45E-04 |
| 1Mar2011- | 6429  | 975.55  | -13.0268 | 1 K.LPKLDAYI chr4@1149  | 1.27E-10 | 0.003321 |
| 1Mar2011- | 4860  | 534.32  | 13.11853 | 2 K.TNIYTILTI chr5@1329 | 2.95E-10 | 0.007155 |
| 1Mar2011- | 20140 | 1161.58 | -24.6118 | 2 K.YLGAYLL/ Splice@chr | 7.39E-13 | 0        |
| 1Mar2011- | 19709 | 770.43  | -18.4033 | 3 K.YLDAKCK chr4@3751   | 1.65E-10 | 0.004116 |
| 1Mar2011- | 19345 | 688.75  | 8.895763 | 5 R.FQSAAIG Splice@chr  | 1.99E-11 | 5.48E-04 |
| 1Mar2011- | 12977 | 888.97  | 20.94366 | 2 K.DITLEVEA Splice@chr | 9.48E-16 | 0        |
| 1Mar2011- | 17110 | 1097.22 | 2.692596 | 3 K.DKPFPSI Splice@chr  | 1.30E-10 | 0.003321 |
| 1Mar2011- | 13166 | 592.65  | 24.14055 | 3 K.DITLEVEA Splice@chr | 2.85E-10 | 0.007045 |
| 1Mar2011- | 3664  | 936.48  | 27.86052 | 1 K.LNGGYEC chr2@1191   | 2.08E-10 | 0.005547 |
| 1Mar2011- | 5313  | 533.82  | 16.26677 | 2 K.TNIYTILTI chr5@1329 | 2.07E-10 | 0.005547 |
| 1Mar2011- | 20536 | 1175.12 | 6.371728 | 2 K.INWAVTI chr4@2890   | 2.49E-25 | 0        |
| 1Mar2011- | 13524 | 592.98  | 16.54196 | 3 K.DITLEVEA Splice@chr | 1.91E-10 | 0.005323 |
| 1Mar2011- | 8080  | 509.3   | -20.473  | 2 R.SSVIMLIV chr2@5767  | 2.34E-10 | 0.005998 |
| 1Mar2011- | 11666 | 838.94  | -22.1914 | 2 R.QFADLPS chr5@1898   | 1.08E-10 | 0.003471 |
| 1Mar2011- | 4703  | 827.51  | -29.7395 | 2 R.RKFPK+1. chrX@2963  | 3.45E-10 | 0.008376 |
| 1Mar2011- | 4782  | 439.91  | 17.33685 | 3 K.NSQKNPI chr2@3540   | 2.06E-10 | 0.005547 |
| 1Mar2011- | 15727 | 732.07  | 19.51873 | 3 R.ATDDWII Splice@chr  | 3.75E-11 | 0.001795 |
| 1Mar2011- | 5263  | 533.82  | 16.26677 | 2 K.TNIYTILTI chr5@1329 | 1.74E-10 | 0.005086 |
| 1Mar2011- | 9789  | 661.4   | -2.4954  | 2 K.LVLIAVN1 chr1@6528  | 1.49E-10 | 0.004397 |
| 1Mar2011- | 3559  | 449.9   | -22.2077 | 3 R.WAFLELF Splice@chr  | 2.80E-10 | 0.006785 |
| 1Mar2011- | 18327 | 805.47  | -13.7324 | 2 K.TPIFIPAP: chr5@1861 | 3.70E-10 | 0.00916  |
| 1Mar2011- | 14838 | 849.47  | -1.18638 | 2 R.LLELAPTC chr2@6685  | 1.75E-17 | 0        |
| 1Mar2011- | 18367 | 805.47  | -13.7324 | 2 K.TPIFIPAP: chr5@1861 | 3.66E-10 | 0.009051 |
| 1Mar2011- | 13354 | 888.47  | 22.8338  | 2 K.DITLEVEA Splice@chr | 6.17E-15 | 0        |
| 1Mar2011- | 20032 | 688.75  | 8.895763 | 5 R.FQSAAIG Splice@chr  | 1.57E-10 | 0.004397 |
| 1Mar2011- | 15849 | 825.95  | 6.510915 | 2 _K+14.016 Splice@chr  | 3.02E-10 | 0.007243 |

|           |       |         |          |                         |          |          |
|-----------|-------|---------|----------|-------------------------|----------|----------|
| 1Mar2011- | 14895 | 848.97  | 0.791766 | 2 R.LLELAPTC chr2@6685  | 1.44E-16 | 0        |
| 1Mar2011- | 7930  | 688.03  | -17.0347 | 3 L.IFK+14.01 chr3@8836 | 3.41E-10 | 0.008261 |
| 1Mar2011- | 2618  | 675.35  | 27.69703 | 1 R.GVEGEG chr1@1159    | 1.15E-10 | 0.003471 |
| 1Mar2011- | 13474 | 888.47  | 22.8338  | 2 K.DITLEVEA Splice@chr | 4.09E-13 | 0        |
| 1Mar2011- | 13529 | 888.47  | 22.8338  | 2 K.DITLEVEA Splice@chr | 7.68E-14 | 0        |
| 1Mar2011- | 20038 | 860.69  | 14.08015 | 4 R.FQSAAG Splice@chr   | 1.57E-16 | 0        |
| 1Mar2011- | 14796 | 722.45  | -4.95112 | 2 R.RK+14.01 Splice@chr | 4.04E-10 | 0.009937 |
| 1Mar2011- | 12006 | 618.32  | 1.155298 | 3 K.LTNLSTA Splice@chr  | 3.56E-10 | 0.008716 |
| 1Mar2011- | 6060  | 455.25  | 8.8683   | 3 K.LEAKGGC chr5@1298   | 2.01E-10 | 0.005547 |
| 1Mar2011- | 7226  | 560.94  | -12.2507 | 3 _EMFSAA chr4@3419     | 2.40E-10 | 0.006089 |
| 1Mar2011- | 3672  | 407.74  | 5.852463 | 2 R.ASDIAPIK chrX@1799  | 1.60E-10 | 0.004516 |
| 1Mar2011- | 15201 | 1167.56 | -16.7225 | 2 L.K+14.016 Splice@chr | 8.04E-12 | 3.10E-04 |
| 1Mar2011- | 13417 | 888.47  | 22.8338  | 2 K.DITLEVEA Splice@chr | 9.25E-15 | 0        |
| 1Mar2011- | 18352 | 634.84  | 6.410455 | 2 R.VDIGDILF Splice@chr | 2.48E-12 | 1.59E-04 |
| 1Mar2011- | 4690  | 693.87  | -6.6949  | 2 V.ICVAVGD chr5@1063   | 2.52E-10 | 0.006089 |
| 1Mar2011- | 10355 | 671.37  | -24.0361 | 2 T.FNIVHTQ Splice@chr  | 3.62E-10 | 0.00894  |
| 1Mar2011- | 13302 | 888.47  | 22.8338  | 2 K.DITLEVEA Splice@chr | 1.45E-14 | 0        |
| 1Mar2011- | 15790 | 825.95  | 6.510915 | 2 _K+14.016 Splice@chr  | 2.09E-11 | 0.001294 |
| 1Mar2011- | 20550 | 1175.12 | 6.371728 | 2 K.INWAVTI chr4@2890   | 1.41E-23 | 0        |
| 1Mar2011- | 20552 | 783.42  | 13.00166 | 3 K.INWAVTI chr4@2890   | 1.49E-13 | 0        |
| 1Mar2011- | 13586 | 888.47  | 22.8338  | 2 K.DITLEVEA Splice@chr | 6.84E-13 | 0        |
| 1Mar2011- | 20537 | 783.75  | 7.307848 | 3 K.INWAVTI chr4@2890   | 4.42E-16 | 0        |
| 1Mar2011- | 16888 | 1097.23 | 11.82664 | 3 K.DKPFFPSI Splice@chr | 8.98E-11 | 0.00301  |
| 1Mar2011- | 20749 | 1040.9  | 3.834672 | 3 E.LFQIIVM chr2@1065   | 3.01E-10 | 0.007243 |
| 1Mar2011- | 12084 | 888.47  | 22.8338  | 2 K.DITLEVEA Splice@chr | 6.28E-15 | 0        |
| 1Mar2011- | 13683 | 1167.55 | -25.3067 | 2 L.K+14.016 Splice@chr | 1.15E-11 | 1.52E-04 |
| 1Mar2011- | 11971 | 888.97  | 20.94366 | 2 K.DITLEVEA Splice@chr | 1.15E-15 | 0        |
| 1Mar2011- | 1991  | 407.74  | 5.852463 | 2 R.ASDIAPIK chrX@1799  | 1.17E-10 | 0.002467 |
| 1Mar2011- | 14113 | 825.94  | -5.62306 | 2 _K+14.016 Splice@chr  | 3.33E-11 | 5.89E-04 |
| 1Mar2011- | 12134 | 888.47  | 22.8338  | 2 K.DITLEVEA Splice@chr | 1.04E-12 | 0        |
| 1Mar2011- | 13226 | 848.97  | 0.791766 | 2 R.LLELAPTC chr2@6685  | 8.09E-19 | 0        |
| 1Mar2011- | 18093 | 1040.89 | -5.8694  | 3 E.LFQIIVM chr2@1065   | 1.32E-10 | 0.002988 |
| 1Mar2011- | 17779 | 828.39  | -8.00743 | 2 K.PNLK+14 chr2@3862   | 1.30E-10 | 0.002856 |
| 1Mar2011- | 4251  | 533.82  | 16.26677 | 2 K.TNIYTILTI chr5@1329 | 3.59E-10 | 0.00742  |
| 1Mar2011- | 15665 | 581.57  | 18.95936 | 4 K.YLGAYLL Splice@chr  | 5.21E-12 | 0        |
| 1Mar2011- | 6937  | 558.3   | -2.40945 | 3 R.EK+14.01 chr1@1077  | 1.94E-11 | 1.52E-04 |
| 1Mar2011- | 6685  | 509.3   | -20.473  | 2 R.SSVIMLIV chr2@5767  | 4.28E-10 | 0.009122 |
| 1Mar2011- | 14067 | 825.94  | -5.62306 | 2 _K+14.016 Splice@chr  | 2.16E-11 | 3.00E-04 |
| 1Mar2011- | 17966 | 783.41  | 0.208027 | 3 K.INWAVTI chr4@2890   | 2.31E-14 | 0        |
| 1Mar2011- | 17963 | 1175.12 | 6.371728 | 2 K.INWAVTI chr4@2890   | 4.35E-23 | 0        |
| 1Mar2011- | 9703  | 556.85  | 26.98454 | 2 R.NKEPNLII chr2@8282  | 3.38E-10 | 0.00742  |
| 1Mar2011- | 17763 | 828.38  | -20.1128 | 2 K.PNLK+14 chr2@3862   | 2.04E-10 | 0.004888 |
| 1Mar2011- | 17489 | 860.69  | 14.08015 | 4 R.FQSAAG Splice@chr   | 6.11E-16 | 0        |
| 1Mar2011- | 5618  | 975.55  | -13.0268 | 1 K.LPKLDAYI chr4@1149  | 6.92E-11 | 0.001545 |
| 1Mar2011- | 12186 | 888.47  | 22.8338  | 2 K.DITLEVEA Splice@chr | 8.96E-13 | 0        |
| 1Mar2011- | 11042 | 1169.54 | -25.4726 | 2 ?.AQDNYM Splice@chr   | 3.16E-14 | 0        |
| 1Mar2011- | 16936 | 1096.89 | 6.757706 | 3 K.DKPFFPSI Splice@chr | 4.57E-10 | 0.009846 |

|           |       |         |          |                         |          |          |
|-----------|-------|---------|----------|-------------------------|----------|----------|
| 1Mar2011- | 11058 | 780.03  | -24.5321 | 3 ?.AQDNYM Splice@chr   | 4.22E-11 | 8.73E-04 |
| 1Mar2011- | 4523  | 1025.61 | -11.6755 | 1 K.LGLGSGL chr5@4945   | 5.02E-12 | 0        |
| 1Mar2011- | 12299 | 888.47  | 22.8338  | 2 K.DITLEVEA Splice@chr | 5.12E-13 | 0        |
| 1Mar2011- | 4647  | 455.25  | 8.8683   | 3 K.LEAKGGC chr5@1298   | 3.24E-10 | 0.007326 |
| 1Mar2011- | 12271 | 592.65  | 24.14055 | 3 K.DITLEVEA Splice@chr | 1.78E-11 | 1.52E-04 |
| 1Mar2011- | 14999 | 1063.86 | -15.3899 | 3 K.SGDAGIV Splice@chr  | 8.20E-11 | 0.001674 |
| 1Mar2011- | 4080  | 533.82  | 16.26677 | 2 K.TNIYTILTI chr5@1329 | 9.85E-11 | 0.002217 |
| 1Mar2011- | 3397  | 693.86  | -21.1418 | 2 V.ICVAVGD chr5@1065   | 9.09E-11 | 0.001949 |
| 1Mar2011- | 17616 | 1014.23 | -23.9214 | 3 R.KLMSLAV chr5@1141   | 4.86E-13 | 0        |
| 1Mar2011- | 6631  | 509.3   | -20.473  | 2 R.SSVIMLIV chr2@5767  | 1.26E-10 | 0.002721 |
| 1Mar2011- | 2638  | 716.39  | -5.97224 | 1 K.LAANAEK chr5@1339   | 2.94E-10 | 0.007106 |
| 1Mar2011- | 14904 | 987.51  | 4.289691 | 3 K.KYLFLDNI chr4@1288  | 8.93E-11 | 0.001812 |
| 1Mar2011- | 11920 | 888.97  | 20.94366 | 2 K.DITLEVEA Splice@chr | 2.87E-15 | 0        |
| 1Mar2011- | 17639 | 1014.23 | -23.9214 | 3 R.KLMSLAV chr5@1141   | 7.60E-12 | 0        |
| 1Mar2011- | 4193  | 533.82  | 16.26677 | 2 K.TNIYTILTI chr5@1329 | 2.75E-10 | 0.006881 |
| 1Mar2011- | 14834 | 665.37  | -26.6417 | 2 Q.INNK+14 Splice@chr  | 2.09E-10 | 0.005015 |
| 1Mar2011- | 3907  | 533.82  | 16.26677 | 2 K.TNIYTILTI chr5@1329 | 2.87E-10 | 0.007106 |
| 1Mar2011- | 2256  | 936.48  | 27.86052 | 1 K.LNGGYEC chr2@1191   | 1.16E-10 | 0.002467 |
| 1Mar2011- | 16288 | 805.47  | -13.7324 | 2 K.TPIFIPAP chr5@1861  | 7.21E-11 | 0.001545 |
| 1Mar2011- | 10399 | 854.96  | 28.93022 | 2 _.KSFEVAIE Splice@chr | 1.93E-16 | 0        |
| 1Mar2011- | 2212  | 936.48  | 27.86052 | 1 K.LNGGYEC chr2@1191   | 4.55E-11 | 8.73E-04 |
| 1Mar2011- | 15904 | 973.45  | 6.192833 | 3 _.GCSIVPIS Splice@chr | 1.36E-10 | 0.003112 |
| 1Mar2011- | 12027 | 888.47  | 22.8338  | 2 K.DITLEVEA Splice@chr | 1.77E-15 | 0        |
| 1Mar2011- | 17469 | 1147.25 | 13.44098 | 3 R.FQSAAIG Splice@chr  | 1.15E-15 | 0        |
| 1Mar2011- | 8358  | 600.99  | -7.79911 | 3 K.QFLTFLT chr4@7690   | 2.22E-10 | 0.005123 |
| 1Mar2011- | 15115 | 1097.22 | 2.692596 | 3 K.DKPFPSI Splice@chr  | 4.46E-11 | 8.73E-04 |
| 1Mar2011- | 11004 | 780.03  | -24.5321 | 3 ?.AQDNYM Splice@chr   | 1.05E-11 | 1.52E-04 |
| 1Mar2011- | 4137  | 533.82  | 16.26677 | 2 K.TNIYTILTI chr5@1329 | 2.16E-10 | 0.005123 |
| 1Mar2011- | 15067 | 1097.22 | 2.692596 | 3 K.DKPFPSI Splice@chr  | 2.21E-11 | 3.00E-04 |
| 1Mar2011- | 15069 | 1003.18 | 7.145987 | 3 R.CWNRRA Splice@chr   | 4.67E-12 | 0        |
| 1Mar2011- | 14744 | 1167.56 | -16.7225 | 2 L.K+14.016 Splice@chr | 1.41E-11 | 6.05E-04 |
| 1Mar2011- | 13056 | 888.47  | 22.8338  | 2 K.DITLEVEA Splice@chr | 1.95E-15 | 0        |
| 1Mar2011- | 12298 | 780.03  | -24.5321 | 3 ?.AQDNYM Splice@chr   | 1.57E-11 | 7.45E-04 |
| 1Mar2011- | 13112 | 888.97  | 20.94366 | 2 K.DITLEVEA Splice@chr | 8.31E-16 | 0        |
| 1Mar2011- | 5711  | 1025.62 | -1.90621 | 1 K.LGLGSGL chr5@4945   | 3.11E-12 | 1.58E-04 |
| 1Mar2011- | 3495  | 407.74  | 5.852463 | 2 R.ASDIAPIK chrX@1799  | 2.89E-10 | 0.008721 |
| 1Mar2011- | 3801  | 564.32  | -22.6447 | 2 K.IFVLKHEM chr5@1811  | 3.53E-10 | 0.009394 |
| 1Mar2011- | 14369 | 848.97  | 0.791766 | 2 R.LLELAPTC chr2@6685  | 1.48E-18 | 0        |
| 1Mar2011- | 11646 | 854.96  | 28.93022 | 2 _.KSFEVAIE Splice@chr | 3.96E-18 | 0        |
| 1Mar2011- | 7820  | 509.3   | -20.473  | 2 R.SSVIMLIV chr2@5767  | 2.32E-10 | 0.006966 |
| 1Mar2011- | 16099 | 1063.86 | -15.3899 | 3 K.SGDAGIV Splice@chr  | 2.65E-11 | 0.001016 |
| 1Mar2011- | 17437 | 805.47  | -13.7324 | 2 K.TPIFIPAP chr5@1861  | 2.26E-10 | 0.006728 |
| 1Mar2011- | 6858  | 975.56  | -2.75567 | 1 K.LPKLDAYI chr4@1149  | 4.79E-11 | 0.001683 |
| 1Mar2011- | 18700 | 860.69  | 14.08015 | 4 R.FQSAAIG Splice@chr  | 3.07E-13 | 0        |
| 1Mar2011- | 11235 | 572.29  | -17.3076 | 3 K.KASFEIVM chrX@1609  | 3.06E-10 | 0.008839 |
| 1Mar2011- | 16220 | 987.51  | 4.289691 | 3 K.KYLFLDNI chr4@1288  | 6.48E-11 | 0.002062 |
| 1Mar2011- | 18148 | 1096.9  | 15.96601 | 3 K.DKPFPSI Splice@chr  | 2.97E-11 | 0.001293 |

|           |       |         |          |                         |          |          |
|-----------|-------|---------|----------|-------------------------|----------|----------|
| 1Mar2011- | 3629  | 936.48  | 27.86052 | 1 K.LNGGYEC chr2@1191   | 3.53E-11 | 0.001419 |
| 1Mar2011- | 17949 | 968.47  | 23.9199  | 3 _GCSIVPIS Splice@chr  | 6.98E-11 | 0.002595 |
| 1Mar2011- | 14702 | 946.96  | -27.9189 | 2 K.MWMNV Splice@chr    | 7.17E-11 | 0.002595 |
| 1Mar2011- | 5594  | 1025.61 | -11.6755 | 1 K.LGLGSGI chr5@4945   | 1.30E-11 | 4.59E-04 |
| 1Mar2011- | 19275 | 987.05  | 3.342565 | 2 K.EMINALS chr4@1164   | 3.18E-11 | 0.001293 |
| 1Mar2011- | 16461 | 814.48  | -17.1534 | 2 K.RTILQLNI chr5@4352  | 1.57E-10 | 0.004389 |
| 1Mar2011- | 7120  | 717.93  | -1.61756 | 2 _EELRLQLI chr4@1110   | 2.94E-10 | 0.008721 |
| 1Mar2011- | 8891  | 873.45  | 11.16623 | 2 S.IM+15.95 Splice@chr | 2.12E-10 | 0.006236 |
| 1Mar2011- | 15289 | 826.45  | 4.477555 | 2 _K+14.016 Splice@chr  | 3.65E-11 | 0.001419 |
| 1Mar2011- | 13172 | 888.47  | 22.8338  | 2 K.DITLEVEA Splice@chr | 2.02E-14 | 0        |
| 1Mar2011- | 18722 | 860.69  | 14.08015 | 4 R.FQSAAIG Splice@chr  | 1.44E-14 | 0        |
| 1Mar2011- | 5491  | 533.82  | 16.26677 | 2 K.TNIYTILTI chr5@1329 | 2.35E-10 | 0.007088 |
| 1Mar2011- | 11790 | 855.91  | -24.1079 | 2 _HVQEVAI Splice@chr   | 5.15E-11 | 0.001804 |
| 1Mar2011- | 18170 | 1096.89 | 6.757706 | 3 K.DKPFFPSI Splice@chr | 2.46E-10 | 0.007435 |
| 1Mar2011- | 18764 | 1147.24 | 4.705638 | 3 R.FQSAAIG Splice@chr  | 1.09E-13 | 0        |
| 1Mar2011- | 12243 | 780.03  | -24.5321 | 3 ?.AQDN YM Splice@chr  | 1.32E-12 | 0        |
| 1Mar2011- | 14647 | 946.96  | -27.9189 | 2 K.MWMNV Splice@chr    | 2.24E-10 | 0.006603 |
| 1Mar2011- | 4687  | 693.87  | -6.6949  | 2 V.ICVAVGD chr5@1065   | 1.02E-10 | 0.003336 |
| 1Mar2011- | 16236 | 1097.22 | 2.692596 | 3 K.DKPFFPSI Splice@chr | 5.69E-12 | 1.58E-04 |
| 1Mar2011- | 16452 | 987.51  | 4.289691 | 3 K.KYLFLDNI chr4@1288  | 5.57E-11 | 0.001804 |
| 1Mar2011- | 7064  | 560.94  | -12.2507 | 3 _EMFSAAI chr4@3419    | 1.50E-10 | 0.004389 |
| 1Mar2011- | 2953  | 431.74  | 5.455516 | 2 _PIQDVYK Splice@chr   | 1.99E-10 | 0.005617 |
| 1Mar2011- | 14804 | 1167.56 | -16.7225 | 2 L.K+14.016 Splice@chr | 6.64E-12 | 1.58E-04 |
| 1Mar2011- | 3857  | 564.32  | -22.6447 | 2 K.IFVLKHEI chr5@1811  | 1.11E-10 | 0.003585 |
| 1Mar2011- | 17400 | 805.97  | -15.8175 | 2 K.TPIFIPAP chr5@1861  | 2.83E-10 | 0.008721 |
| 1Mar2011- | 2043  | 439.91  | 17.33685 | 3 K.NSQKNPI chr2@3540   | 1.37E-10 | 0.004304 |
| 1Mar2011- | 5258  | 533.82  | 16.26677 | 2 K.TNIYTILTI chr5@1329 | 3.47E-10 | 0.009394 |
| 1Mar2011- | 19277 | 780.92  | -5.16507 | 4 E.LFQIIVM chr2@1065   | 2.94E-10 | 0.008721 |
| 1Mar2011- | 13005 | 888.47  | 22.8338  | 2 K.DITLEVEA Splice@chr | 3.79E-15 | 0        |
| 1Mar2011- | 12285 | 1169.54 | -25.4726 | 2 ?.AQDN YM Splice@chr  | 6.20E-15 | 0        |
| 1Mar2011- | 11354 | 888.47  | 22.8338  | 2 K.DITLEVEA Splice@chr | 6.63E-13 | 2.20E-04 |
| 1Mar2011- | 14831 | 581.57  | 18.95936 | 4 K.YLGAYLL Splice@chr  | 1.97E-13 | 0        |
| 1Mar2011- | 14875 | 581.57  | 18.95936 | 4 K.YLGAYLL Splice@chr  | 8.12E-13 | 2.20E-04 |
| 1Mar2011- | 16978 | 860.69  | 14.08015 | 4 R.FQSAAIG Splice@chr  | 6.46E-14 | 0        |
| 1Mar2011- | 4027  | 563.32  | 4.667378 | 2 R.K+14.016 Splice@chr | 3.19E-12 | 2.20E-04 |
| 1Mar2011- | 8043  | 624.34  | -5.38544 | 2 R.FANK+14 Splice@chr  | 4.70E-11 | 0.00194  |
| 1Mar2011- | 5429  | 862.47  | 2.904885 | 1 _PIQDVYK Splice@chr   | 1.80E-10 | 0.007323 |
| 1Mar2011- | 7836  | 614.85  | 15.61097 | 2 _EVSILWA chr2@1409    | 2.03E-10 | 0.007737 |
| 1Mar2011- | 17010 | 860.69  | 14.08015 | 4 R.FQSAAIG Splice@chr  | 7.65E-14 | 0        |
| 1Mar2011- | 6272  | 509.3   | -20.473  | 2 R.SSVIMLIV chr2@5767  | 1.28E-10 | 0.004591 |
| 1Mar2011- | 10377 | 780.03  | -24.5321 | 3 ?.AQDN YM Splice@chr  | 1.09E-10 | 0.004317 |
| 1Mar2011- | 3937  | 533.82  | 16.26677 | 2 K.TNIYTILTI chr5@1329 | 1.65E-10 | 0.006432 |
| 1Mar2011- | 6217  | 509.3   | -20.473  | 2 R.SSVIMLIV chr2@5767  | 6.46E-11 | 0.002585 |
| 1Mar2011- | 15213 | 934.48  | 16.93502 | 2 R.QFRQSGI chr5@4795   | 2.24E-10 | 0.008163 |
| 1Mar2011- | 12338 | 722.45  | -4.95112 | 2 R.RK+14.01 Splice@chr | 1.09E-10 | 0.004317 |
| 1Mar2011- | 10396 | 938.46  | 22.50833 | 2 R.ECSQSDS chr2@8876   | 1.62E-10 | 0.006432 |
| 1Mar2011- | 12731 | 946.96  | -27.9189 | 2 K.MWMNV Splice@chr    | 2.65E-10 | 0.008848 |

|           |       |         |          |                         |          |          |
|-----------|-------|---------|----------|-------------------------|----------|----------|
| 1Mar2011- | 3827  | 533.82  | 16.26677 | 2 K.TNIYTILTI chr5@1329 | 1.25E-10 | 0.00444  |
| 1Mar2011- | 6457  | 558.3   | -2.40945 | 3 R.EK+14.01 chr1@1077  | 1.47E-10 | 0.005515 |
| 1Mar2011- | 17689 | 780.92  | -5.16507 | 4 E.LFQIIVM+ chr2@1065  | 2.45E-10 | 0.008551 |
| 1Mar2011- | 12239 | 722.45  | -4.95112 | 2 R.RK+14.01 Splice@chr | 1.87E-10 | 0.007466 |
| 1Mar2011- | 10326 | 664.7   | 27.08325 | 3 R.TPLPDIN5 chr4@1088  | 1.62E-10 | 0.006432 |
| 1Mar2011- | 11301 | 888.47  | 22.8338  | 2 K.DITLEVEA Splice@chr | 2.96E-13 | 0        |
| 1Mar2011- | 7923  | 505.97  | -28.6631 | 3 _K+14.016 chrX@1507   | 8.14E-11 | 0.003566 |
| 1Mar2011- | 12368 | 849.47  | -1.18638 | 2 R.LLELAPTC chr2@6685  | 3.51E-18 | 0        |
| 1Mar2011- | 1579  | 484.73  | -5.6149  | 2 K.FSEKLESE Splice@chr | 1.80E-10 | 0.007323 |
| 1Mar2011- | 6566  | 558.3   | -2.40945 | 3 R.EK+14.01 chr1@1077  | 1.15E-11 | 5.64E-04 |
| 1Mar2011- | 7824  | 657.04  | -26.9179 | 3 R.GNVRK+1 chrX@7490   | 7.17E-11 | 0.002684 |
| 1Mar2011- | 4467  | 533.82  | 16.26677 | 2 K.TNIYTILTI chr5@1329 | 2.78E-10 | 0.009816 |
| 1Mar2011- | 13893 | 987.5   | -5.85708 | 3 K.KYLFLDNI chr4@1288  | 7.42E-11 | 0.002684 |
| 1Mar2011- | 7950  | 614.85  | 15.61097 | 2 _EVSILWA chr2@1409    | 1.94E-10 | 0.005333 |
| 1Mar2011- | 5829  | 800.49  | 2.290306 | 1 K.VEAAVAI Splice@chr  | 2.75E-10 | 0.009671 |
| 1Mar2011- | 8001  | 472.29  | -0.64754 | 2 _SPLFVPKI chrX@4402   | 1.54E-10 | 0.00478  |
| 1Mar2011- | 12826 | 946.96  | -27.9189 | 2 K.MWMNV Splice@chr    | 2.16E-10 | 0.006241 |
| 1Mar2011- | 10506 | 780.03  | -24.5321 | 3 ?.AQDN YM Splice@chr  | 1.43E-11 | 0        |
| 1Mar2011- | 11362 | 888.97  | 20.94366 | 2 K.DITLEVEA Splice@chr | 1.77E-15 | 0        |
| 1Mar2011- | 11454 | 888.47  | 22.8338  | 2 K.DITLEVEA Splice@chr | 1.64E-11 | 0        |
| 1Mar2011- | 10559 | 780.03  | -24.5321 | 3 ?.AQDN YM Splice@chr  | 1.77E-10 | 0.005207 |
| 1Mar2011- | 14208 | 751.37  | -29.1192 | 4 R.ICIKAQRS chrX@1215  | 5.45E-12 | 0        |
| 1Mar2011- | 848   | 562.31  | -13.4391 | 2 R.FYLLYLYK Splice@chr | 7.50E-11 | 0.002684 |
| 1Mar2011- | 7944  | 661.4   | -2.4954  | 2 K.LVLI AVN1 chr1@6528 | 2.33E-10 | 0.007134 |
| 1Mar2011- | 15578 | 968.13  | 18.26018 | 3 _GCSIVPIS Splice@chr  | 1.16E-11 | 0        |
| 1Mar2011- | 884   | 562.31  | -13.4391 | 2 R.FYLLYLYK Splice@chr | 4.80E-11 | 0.00155  |
| 1Mar2011- | 12426 | 849.48  | 10.61812 | 2 R.LLELAPTC chr2@6685  | 6.10E-16 | 0        |
| 1Mar2011- | 3244  | 563.79  | 15.36187 | 2 K.MGNFFPI chrX@6769   | 1.43E-10 | 0.00478  |
| 1Mar2011- | 12876 | 946.96  | -27.9189 | 2 K.MWMNV Splice@chr    | 1.42E-10 | 0.00478  |
| 1Mar2011- | 3743  | 693.87  | -6.6949  | 2 V.ICVAVGD chr5@1065   | 1.62E-10 | 0.00478  |
| 1Mar2011- | 4251  | 533.82  | 16.26677 | 2 K.TNIYTILTI chr5@1329 | 2.50E-10 | 0.007566 |
| 1Mar2011- | 8729  | 516.29  | 9.357636 | 2 K.VSVDVLE chrX@1218   | 2.42E-11 | 5.43E-04 |
| 1Mar2011- | 7751  | 512.28  | 29.10028 | 2 R.ICTTATID chr5@1130  | 1.17E-10 | 0.002416 |
| 1Mar2011- | 1655  | 439.91  | 17.33685 | 3 K.NSQKNPI chr2@3540   | 2.22E-10 | 0.003629 |
| 1Mar2011- | 9422  | 472.29  | -0.64754 | 2 _SPLFVPKI chrX@4402   | 1.50E-10 | 0.002772 |
| 1Mar2011- | 5137  | 534.32  | 13.11853 | 2 K.TNIYTILTI chr5@1329 | 1.74E-10 | 0.002899 |
| 1Mar2011- | 6794  | 560.6   | -22.2499 | 3 _EMFSAA\ chr4@3419    | 6.87E-11 | 0.001695 |
| 1Mar2011- | 12311 | 780.03  | -24.5321 | 3 ?.AQDN YM Splice@chr  | 8.65E-12 | 0        |
| 1Mar2011- | 10922 | 556.86  | -10.3839 | 2 R.QNKIVLI\ Splice@chr | 2.05E-10 | 0.003069 |
| 1Mar2011- | 5338  | 1025.62 | -1.90621 | 1 K.LGLGSGL chr5@4945   | 2.29E-10 | 0.003803 |
| 1Mar2011- | 10986 | 556.86  | -10.3839 | 2 R.QNKIVLI\ Splice@chr | 5.21E-10 | 0.008961 |
| 1Mar2011- | 4947  | 533.82  | 16.26677 | 2 K.TNIYTILTI chr5@1329 | 4.17E-10 | 0.006751 |
| 1Mar2011- | 6941  | 444.91  | 23.28334 | 3 K.CTLINELN Splice@chr | 2.57E-11 | 6.93E-04 |
| 1Mar2011- | 9372  | 472.29  | -0.64754 | 2 _SPLFVPKI chrX@4402   | 1.37E-10 | 0.002772 |
| 1Mar2011- | 9821  | 671.37  | -24.0361 | 2 T.FNIVHTQ Splice@chr  | 4.27E-10 | 0.007464 |
| 1Mar2011- | 1623  | 795.48  | -0.38412 | 1 K.LMLPPPK Splice@chr  | 5.22E-10 | 0.008961 |
| 1Mar2011- | 12197 | 780.03  | -24.5321 | 3 ?.AQDN YM Splice@chr  | 7.12E-11 | 0.002071 |

|           |       |         |          |                         |          |          |
|-----------|-------|---------|----------|-------------------------|----------|----------|
| 1Mar2011- | 4351  | 523.78  | 24.05167 | 2 K.LWDNNE Splice@chr   | 5.51E-10 | 0.009633 |
| 1Mar2011- | 9414  | 614.85  | 15.61097 | 2 _._EVSILWA chr2@140   | 3.23E-11 | 0.001302 |
| 1Mar2011- | 12170 | 938.46  | 22.50833 | 2 R.ECSQSDS chr2@887    | 3.32E-10 | 0.006111 |
| 1Mar2011- | 7314  | 1029.07 | 1.099911 | 2 R.ICKNSYP\ Splice@chr | 4.66E-10 | 0.008108 |
| 1Mar2011- | 6475  | 496.3   | 9.488848 | 2 R.EIKLFDVK chr1@540   | 3.82E-10 | 0.006212 |
| 1Mar2011- | 831   | 494.3   | -22.5391 | 2 K.VIESVKRF chr4@647   | 4.66E-10 | 0.008108 |
| 1Mar2011- | 2731  | 439.91  | -1.85417 | 3 K.VAGSGSL chr5@174    | 1.94E-10 | 0.002899 |
| 1Mar2011- | 3455  | 626.3   | -9.76097 | 2 R.LCESGAA Splice@chr  | 4.49E-16 | 0        |
| 1Mar2011- | 6725  | 862.47  | 2.904885 | 1 _._PIQDVYK Splice@chr | 1.80E-10 | 0.002899 |
| 1Mar2011- | 1857  | 536.29  | -10.9462 | 2 _._QVEFNPI Splice@chr | 7.77E-12 | 0        |
| 1Mar2011- | 12124 | 664.7   | 1.197202 | 3 _._PTLNK+1. chr1@652  | 3.67E-11 | 0.001302 |
| 1Mar2011- | 2010  | 423.26  | 5.212441 | 2 R.IYAPRPK. chr5@188   | 2.46E-10 | 0.00417  |
| 1Mar2011- | 4892  | 533.82  | 16.26677 | 2 K.TNIYTILTI chr5@132  | 3.63E-10 | 0.006212 |
| 1Mar2011- | 2674  | 439.91  | -1.85417 | 3 K.VAGSGSL chr5@174    | 4.08E-10 | 0.006212 |
| 1Mar2011- | 12253 | 780.03  | -24.5321 | 3 ?.AQDNYM Splice@chr   | 2.75E-11 | 9.16E-04 |
| 1Mar2011- | 6665  | 862.47  | 2.904885 | 1 _._PIQDVYK Splice@chr | 4.00E-10 | 0.006212 |
| 1Mar2011- | 6635  | 630.86  | 16.57085 | 2 K.SQISQATI Splice@chr | 2.55E-10 | 0.004349 |
| 1Mar2011- | 6651  | 975.55  | -13.0268 | 1 K.LPKLDAYI chr4@114   | 8.43E-11 | 0.002071 |
| 1Mar2011- | 12185 | 664.7   | 1.197202 | 3 _._PTLNK+1. chr1@652  | 3.62E-11 | 0.001302 |
| 1Mar2011- | 5194  | 534.32  | 13.11853 | 2 K.TNIYTILTI chr5@132  | 5.55E-10 | 0.009633 |
| 1Mar2011- | 6177  | 496.3   | 9.488848 | 2 R.EIKLFDVK Splice@chr | 3.03E-10 | 0.005789 |
| 1Mar2011- | 4785  | 493.78  | -11.3951 | 2 R.KNQENLI Splice@chr  | 3.32E-10 | 0.006458 |
| 1Mar2011- | 130   | 665.38  | -3.2154  | 2 R.QLQM+1 chr5@716     | 3.59E-10 | 0.006651 |
| 1Mar2011- | 4807  | 533.82  | 16.26677 | 2 K.TNIYTILTI chr5@132  | 2.78E-10 | 0.005313 |
| 1Mar2011- | 9224  | 520.78  | 10.0988  | 2 _._KFEVNFE chrX@614   | 4.44E-10 | 0.008564 |
| 1Mar2011- | 9492  | 472.29  | -0.64754 | 2 _._SPLFVPKF chrX@440  | 3.94E-10 | 0.007221 |
| 1Mar2011- | 6584  | 862.47  | 2.904885 | 1 _._PIQDVYK Splice@chr | 3.37E-10 | 0.006458 |
| 1Mar2011- | 9980  | 671.37  | -24.0361 | 2 T.FNIVHTQ Splice@chr  | 4.08E-10 | 0.007616 |
| 1Mar2011- | 6626  | 431.74  | 5.455516 | 2 _._PIQDVYK Splice@chr | 3.75E-10 | 0.006838 |
| 1Mar2011- | 5300  | 1025.61 | -11.6755 | 1 K.LGLGSGSL chr5@494   | 4.14E-12 | 0        |
| 1Mar2011- | 4863  | 533.82  | 16.26677 | 2 K.TNIYTILTI chr5@132  | 2.47E-10 | 0.00491  |
| 1Mar2011- | 3614  | 626.3   | -9.76097 | 2 R.LCESGAA Splice@chr  | 1.57E-15 | 0        |
| 1Mar2011- | 6850  | 560.94  | -12.2507 | 3 _._EMFSAA\ chr4@341   | 1.79E-11 | 2.54E-04 |
| 1Mar2011- | 10289 | 724.06  | 2.506414 | 3 R.NELEVFK chr1@138    | 2.36E-10 | 0.004739 |
| 1Mar2011- | 5049  | 534.32  | 13.11853 | 2 K.TNIYTILTI chr5@132  | 1.76E-10 | 0.003717 |
| 1Mar2011- | 8462  | 825.96  | -15.1379 | 2 R.SARENKT Splice@chr  | 2.30E-10 | 0.004537 |
| 1Mar2011- | 4989  | 534.32  | 13.11853 | 2 K.TNIYTILTI chr5@132  | 4.80E-10 | 0.008952 |
| 1Mar2011- | 6676  | 560.94  | -12.2507 | 3 _._EMFSAA\ chr4@341   | 2.98E-10 | 0.0055   |
| 1Mar2011- | 6548  | 509.3   | -20.473  | 2 R.SSVIMLIV chr2@576   | 3.76E-11 | 0.001784 |
| 1Mar2011- | 6666  | 509.3   | -20.473  | 2 R.SSVIMLIV chr2@576   | 2.04E-10 | 0.005843 |
| 1Mar2011- | 4463  | 533.82  | 16.26677 | 2 K.TNIYTILTI chr5@132  | 3.72E-10 | 0.008902 |
| 1Mar2011- | 6525  | 1017.59 | -22.5744 | 1 R.SSVIMLIV chr2@576   | 6.90E-11 | 0.002999 |
| 1Mar2011- | 6605  | 509.3   | -20.473  | 2 R.SSVIMLIV chr2@576   | 8.05E-11 | 0.003325 |
| 1Mar2011- | 4134  | 533.82  | 16.26677 | 2 K.TNIYTILTI chr5@132  | 1.61E-10 | 0.005843 |
| 1Mar2011- | 4242  | 533.82  | 16.26677 | 2 K.TNIYTILTI chr5@132  | 1.97E-10 | 0.005843 |
| 1Mar2011- | 6576  | 1017.59 | -22.5744 | 1 R.SSVIMLIV chr2@576   | 3.76E-11 | 0.001784 |
| 1Mar2011- | 3513  | 553.33  | -3.70337 | 2 K.PQAKPNF chr5@900    | 1.70E-10 | 0.005843 |

|           |       |         |          |                         |          |          |
|-----------|-------|---------|----------|-------------------------|----------|----------|
| 1Mar2011- | 3610  | 553.33  | -3.70337 | 2 K.PQAKPNI chr5@900    | 2.54E-10 | 0.006508 |
| 1Mar2011- | 4081  | 533.82  | 16.26677 | 2 K.TNIYTILTI chr5@132  | 9.89E-11 | 0.003325 |
| 1Mar2011- | 4297  | 533.82  | 16.26677 | 2 K.TNIYTILTI chr5@132  | 3.36E-10 | 0.008595 |
| 1Mar2011- | 6636  | 1017.59 | -22.5744 | 1 R.SSVIMLIV chr2@576   | 3.76E-11 | 0.001784 |
| 1Mar2011- | 1634  | 915.47  | 1.201399 | 1 K.FHEIGGQ chrX@472    | 1.34E-10 | 0.005328 |
| 1Mar2011- | 6500  | 509.3   | -20.473  | 2 R.SSVIMLIV chr2@576   | 3.76E-11 | 0.001784 |
| 1Mar2011- | 16258 | 805.47  | -13.7324 | 2 K.TPIFIPAP chr5@186   | 2.30E-10 | 0.005655 |
| 1Mar2011- | 17933 | 783.42  | 13.00166 | 3 K.INWAVTI chr4@289    | 1.26E-12 | 0        |
| 1Mar2011- | 14722 | 1003.19 | 17.13413 | 3 R.CWNRRA Splice@chr   | 6.78E-11 | 0.002344 |
| 1Mar2011- | 13979 | 825.95  | 6.510915 | 2 _K+14.016 Splice@chr  | 2.23E-10 | 0.00523  |
| 1Mar2011- | 6995  | 558.3   | -2.40945 | 3 R.EK+14.01 chr1@107   | 3.35E-11 | 0.001317 |
| 1Mar2011- | 6710  | 509.3   | -20.473  | 2 R.SSVIMLIV chr2@576   | 1.05E-10 | 0.002876 |
| 1Mar2011- | 18032 | 1040.9  | 3.834672 | 3 E.LFQIIVM chr2@106    | 2.45E-11 | 0.001006 |
| 1Mar2011- | 7119  | 897.42  | -27.6753 | 3 _QVREMH Splice@chr    | 2.94E-10 | 0.007592 |
| 1Mar2011- | 11680 | 888.47  | 22.8338  | 2 K.DITLEVEA Splice@chr | 1.60E-15 | 0        |
| 1Mar2011- | 4284  | 533.82  | 16.26677 | 2 K.TNIYTILTI chr5@132  | 2.34E-10 | 0.005793 |
| 1Mar2011- | 11624 | 888.47  | 22.8338  | 2 K.DITLEVEA Splice@chr | 4.86E-15 | 0        |
| 1Mar2011- | 17127 | 1096.89 | 6.757706 | 3 K.DKPFPSI Splice@chr  | 1.90E-12 | 0        |
| 1Mar2011- | 11726 | 888.47  | 22.8338  | 2 K.DITLEVEA Splice@chr | 1.58E-15 | 0        |
| 1Mar2011- | 13024 | 849.48  | 10.61812 | 2 R.LLELAPTC chr2@668   | 2.76E-16 | 0        |
| 1Mar2011- | 5847  | 563.33  | 22.46854 | 2 R.K+14.016 Splice@chr | 8.74E-11 | 0.002611 |
| 1Mar2011- | 8321  | 661.4   | -2.4954  | 2 K.LVLIAVN chr1@652    | 1.06E-10 | 0.002876 |
| 1Mar2011- | 2840  | 407.74  | 5.852463 | 2 R.ASDIAPIK chrX@179   | 1.15E-10 | 0.002876 |
| 1Mar2011- | 15058 | 1096.89 | 6.757706 | 3 K.DKPFPSI Splice@chr  | 2.99E-10 | 0.007719 |
| 1Mar2011- | 17593 | 860.69  | 14.08015 | 4 R.FQSAAIG Splice@chr  | 2.21E-14 | 0        |
| 1Mar2011- | 10810 | 780.03  | -24.5321 | 3 ?.AQDNYM Splice@chr   | 9.76E-11 | 0.002755 |
| 1Mar2011- | 17928 | 1175.13 | 14.90082 | 2 K.INWAVTI chr4@289    | 3.69E-23 | 0        |
| 1Mar2011- | 16096 | 965.03  | -17.4108 | 2 F.FLRQIRQI chr4@322   | 3.30E-12 | 1.90E-04 |
| 1Mar2011- | 11711 | 592.65  | 24.14055 | 3 K.DITLEVEA Splice@chr | 3.16E-13 | 0        |
| 1Mar2011- | 5982  | 560.94  | -12.2507 | 3 _EMFSAA chr4@341      | 1.63E-10 | 0.003693 |
| 1Mar2011- | 11842 | 888.47  | 22.8338  | 2 K.DITLEVEA Splice@chr | 3.20E-15 | 0        |
| 1Mar2011- | 15489 | 1097.23 | 11.82664 | 3 K.DKPFPSI Splice@chr  | 8.98E-11 | 0.002611 |
| 1Mar2011- | 11919 | 592.65  | 24.14055 | 3 K.DITLEVEA Splice@chr | 2.38E-11 | 0.001006 |
| 1Mar2011- | 8388  | 583.83  | -11.3703 | 2 R.LVFPITFS chr1@242   | 3.07E-10 | 0.007853 |
| 1Mar2011- | 6814  | 509.3   | -20.473  | 2 R.SSVIMLIV chr2@576   | 7.35E-11 | 0.002344 |
| 1Mar2011- | 13922 | 826.45  | 4.477555 | 2 _K+14.016 Splice@chr  | 1.18E-11 | 5.17E-04 |
| 1Mar2011- | 6761  | 509.3   | -20.473  | 2 R.SSVIMLIV chr2@576   | 7.35E-11 | 0.002344 |
| 1Mar2011- | 6874  | 509.3   | -20.473  | 2 R.SSVIMLIV chr2@576   | 5.33E-11 | 0.001757 |
| 1Mar2011- | 5791  | 596.32  | 13.94377 | 2 K.M+15.99 chr2@146    | 8.48E-11 | 0.002611 |
| 1Mar2011- | 17081 | 1096.9  | 15.96601 | 3 K.DKPFPSI Splice@chr  | 3.96E-12 | 1.90E-04 |
| 1Mar2011- | 11786 | 888.47  | 22.8338  | 2 K.DITLEVEA Splice@chr | 4.82E-15 | 0        |
| 1Mar2011- | 17568 | 860.69  | 14.08015 | 4 R.FQSAAIG Splice@chr  | 1.64E-13 | 0        |
| 1Mar2011- | 17560 | 688.75  | 8.895763 | 5 R.FQSAAIG Splice@chr  | 2.82E-11 | 0.001156 |
| 1Mar2011- | 13072 | 848.97  | 0.791766 | 2 R.LLELAPTC chr2@668   | 2.84E-15 | 0        |
| 1Mar2011- | 2894  | 407.74  | 5.852463 | 2 R.ASDIAPIK chrX@179   | 1.15E-10 | 0.002876 |
| 1Mar2011- | 7592  | 688.03  | -17.0347 | 3 L.IFK+14.01 chr3@883  | 1.45E-10 | 0.003274 |
| 1Mar2011- | 13450 | 888.47  | 22.8338  | 2 K.DITLEVEA Splice@chr | 5.98E-15 | 0        |

|           |       |         |          |                          |          |          |
|-----------|-------|---------|----------|--------------------------|----------|----------|
| 1Mar2011- | 11801 | 854.96  | 28.93022 | 2 _ .KSFEVAIE Splice@chr | 1.89E-17 | 0        |
| 1Mar2011- | 9782  | 671.37  | -24.0361 | 2 T.FNIVHTQ Splice@chr   | 2.62E-10 | 0.006681 |
| 1Mar2011- | 14840 | 848.97  | 0.791766 | 2 R.LLELAPTC chr2@6685   | 6.76E-18 | 0        |
| 1Mar2011- | 19609 | 860.69  | 14.08015 | 4 R.FQSAAIG Splice@chr   | 2.09E-15 | 0        |
| 1Mar2011- | 7718  | 509.3   | -20.473  | 2 R.SSVIMLIV chr2@5767   | 1.48E-10 | 0.003274 |
| 1Mar2011- | 13592 | 888.47  | 22.8338  | 2 K.DITLEVEA Splice@chr  | 2.06E-13 | 0        |
| 1Mar2011- | 13338 | 888.97  | 20.94366 | 2 K.DITLEVEA Splice@chr  | 1.03E-15 | 0        |
| 1Mar2011- | 13644 | 888.47  | 22.8338  | 2 K.DITLEVEA Splice@chr  | 8.08E-13 | 0        |
| 1Mar2011- | 7728  | 1017.59 | -22.5744 | 1 R.SSVIMLIV chr2@5767   | 3.76E-11 | 0.001585 |
| 1Mar2011- | 13820 | 1144.59 | 27.90078 | 2 _ .YYHFTLDI chr5@8295  | 3.33E-10 | 0.008881 |
| 1Mar2011- | 4930  | 533.82  | 16.26677 | 2 K.TNIYTILTI chr5@1329  | 1.75E-10 | 0.003963 |
| 1Mar2011- | 17370 | 581.57  | 18.95936 | 4 K.YLGAYLL Splice@chr   | 6.29E-13 | 0        |
| 1Mar2011- | 9837  | 671.37  | -24.0361 | 2 T.FNIVHTQ Splice@chr   | 3.38E-10 | 0.008988 |
| 1Mar2011- | 18425 | 1008.5  | -22.758  | 2 E.CLVVNLS Splice@chr   | 8.25E-11 | 0.002279 |
| 1Mar2011- | 20386 | 1040.9  | 3.834672 | 3 E.LFQIIVM chr2@1065    | 1.43E-10 | 0.003274 |
| 1Mar2011- | 9566  | 583.82  | -28.5596 | 2 R.LVPITFS chr1@2422    | 3.56E-10 | 0.009538 |
| 1Mar2011- | 5319  | 533.82  | 16.26677 | 2 K.TNIYTILTI chr5@1329  | 2.45E-10 | 0.006117 |
| 1Mar2011- | 11883 | 537.82  | -9.55065 | 2 K.LIGNNVF chr3@5869    | 2.78E-10 | 0.007589 |
| 1Mar2011- | 17407 | 581.57  | 18.95936 | 4 K.YLGAYLL Splice@chr   | 3.13E-12 | 0        |
| 1Mar2011- | 19608 | 1147.25 | 13.44098 | 3 R.FQSAAIG Splice@chr   | 5.13E-17 | 0        |
| 1Mar2011- | 13391 | 888.47  | 22.8338  | 2 K.DITLEVEA Splice@chr  | 2.09E-15 | 0        |
| 1Mar2011- | 9490  | 472.29  | -0.64754 | 2 _ .SPLFVPKF chrX@4402  | 1.43E-10 | 0.003274 |
| 1Mar2011- | 19053 | 1096.88 | -2.30208 | 3 K.DKPFFPSI Splice@chr  | 2.26E-11 | 8.18E-04 |
| 1Mar2011- | 15287 | 946.96  | -27.9189 | 2 K.MWMNV Splice@chr     | 3.48E-10 | 0.009207 |
| 1Mar2011- | 19622 | 1147.25 | 13.44098 | 3 R.FQSAAIG Splice@chr   | 3.36E-16 | 0        |
| 1Mar2011- | 6713  | 975.55  | -13.0268 | 1 K.LPKLDAYI chr4@1149   | 5.09E-11 | 0.001811 |
| 1Mar2011- | 4322  | 693.87  | -6.6949  | 2 V.ICVAVGD chr5@1063    | 4.45E-11 | 0.0017   |
| 1Mar2011- | 7601  | 509.3   | -20.473  | 2 R.SSVIMLIV chr2@5767   | 3.01E-10 | 0.008143 |
| 1Mar2011- | 7659  | 509.3   | -20.473  | 2 R.SSVIMLIV chr2@5767   | 3.35E-10 | 0.008881 |
| 1Mar2011- | 18898 | 1096.89 | 6.757706 | 3 K.DKPFFPSI Splice@chr  | 3.27E-10 | 0.00867  |
| 1Mar2011- | 999   | 587.34  | 11.13845 | 2 R.ARAIEK+ chr4@5939    | 2.18E-10 | 0.005691 |
| 1Mar2011- | 7668  | 1017.59 | -22.5744 | 1 R.SSVIMLIV chr2@5767   | 1.88E-11 | 6.94E-04 |
| 1Mar2011- | 15736 | 826.45  | 4.477555 | 2 _ .K+14.016 Splice@chr | 3.80E-11 | 0.001585 |
| 1Mar2011- | 13684 | 592.65  | 24.14055 | 3 K.DITLEVEA Splice@chr  | 1.48E-10 | 0.003274 |
| 1Mar2011- | 19640 | 1147.25 | 13.44098 | 3 R.FQSAAIG Splice@chr   | 1.06E-15 | 0        |
| 1Mar2011- | 3484  | 564.32  | -22.6447 | 2 K.IFVLKHEN chr5@1811   | 2.36E-10 | 0.006117 |
| 1Mar2011- | 20213 | 783.75  | 7.307848 | 3 K.INWAVTI chr4@2890    | 1.80E-17 | 0        |
| 1Mar2011- | 13511 | 888.47  | 22.8338  | 2 K.DITLEVEA Splice@chr  | 1.67E-15 | 0        |
| 1Mar2011- | 3531  | 564.32  | -22.6447 | 2 K.IFVLKHEN chr5@1811   | 2.72E-10 | 0.007257 |
| 1Mar2011- | 19760 | 1070.59 | 21.26795 | 2 R.KSTENMI chr1@1074    | 3.78E-11 | 0.001585 |
| 1Mar2011- | 8308  | 885.99  | -8.13812 | 2 F.ENVVVEVII Splice@chr | 5.00E-13 | 0        |
| 1Mar2011- | 13289 | 888.47  | 22.8338  | 2 K.DITLEVEA Splice@chr  | 2.86E-15 | 0        |
| 1Mar2011- | 13626 | 592.65  | 24.14055 | 3 K.DITLEVEA Splice@chr  | 7.71E-11 | 0.002279 |
| 1Mar2011- | 16731 | 1003.19 | 17.13413 | 3 R.CWNRRA Splice@chr    | 1.01E-11 | 0        |
| 1Mar2011- | 4986  | 533.82  | 16.26677 | 2 K.TNIYTILTI chr5@1329  | 2.16E-10 | 0.005691 |
| 1Mar2011- | 7613  | 1017.59 | -22.5744 | 1 R.SSVIMLIV chr2@5767   | 6.89E-11 | 0.002047 |
| 1Mar2011- | 2542  | 487.3   | 24.66358 | 2 K.LQTSNGL Splice@chr   | 2.76E-10 | 0.007482 |

|           |       |         |          |                         |          |          |
|-----------|-------|---------|----------|-------------------------|----------|----------|
| 1Mar2011- | 18066 | 805.47  | -13.7324 | 2 K.TPIFIPAP: chr5@1861 | 1.57E-10 | 0.003509 |
| 1Mar2011- | 20212 | 1175.12 | 6.371728 | 2 K.INWAVTI chr4@2890   | 1.78E-22 | 0        |
| 1Mar2011- | 16666 | 987.5   | -5.85708 | 3 K.KYLFLDNI chr4@1288  | 2.26E-10 | 0.005798 |
| 1Mar2011- | 8419  | 688.03  | -17.0347 | 3 L.IFK+14.01 chr3@8836 | 9.02E-11 | 0.002098 |
| 1Mar2011- | 15147 | 849.47  | -1.18638 | 2 R.LLELAPT: chr2@6685  | 1.18E-17 | 0        |
| 1Mar2011- | 18067 | 589.79  | -1.03663 | 2 K.KSEIVNY: chrX@8555  | 1.47E-10 | 0.003117 |
| 1Mar2011- | 13968 | 888.97  | 20.94366 | 2 K.DITLEVEA Splice@chr | 3.15E-14 | 0        |
| 1Mar2011- | 20967 | 1040.9  | 3.834672 | 3 E.LFQIIVM: chr2@1065  | 2.09E-10 | 0.004915 |
| 1Mar2011- | 17208 | 987.51  | 4.289691 | 3 K.KYLFLDNI chr4@1288  | 1.50E-10 | 0.003117 |
| 1Mar2011- | 16960 | 987.51  | 4.289691 | 3 K.KYLFLDNI chr4@1288  | 4.08E-10 | 0.00972  |
| 1Mar2011- | 8520  | 509.3   | -20.473  | 2 R.SSVIMLIV chr2@5767  | 5.33E-11 | 0.001404 |
| 1Mar2011- | 18540 | 805.47  | -13.7324 | 2 K.TPIFIPAP: chr5@1861 | 5.47E-11 | 0.001404 |
| 1Mar2011- | 15205 | 848.97  | 0.791766 | 2 R.LLELAPT: chr2@6685  | 5.63E-17 | 0        |
| 1Mar2011- | 20219 | 860.69  | 14.08015 | 4 R.FQSAAIG Splice@chr  | 5.25E-14 | 0        |
| 1Mar2011- | 13909 | 888.47  | 22.8338  | 2 K.DITLEVEA Splice@chr | 6.31E-16 | 0        |
| 1Mar2011- | 17667 | 582.65  | 15.01592 | 3 R.SIFVDLEP Splice@chr | 5.32E-11 | 0.001404 |
| 1Mar2011- | 13744 | 888.47  | 22.8338  | 2 K.DITLEVEA Splice@chr | 1.18E-15 | 0        |
| 1Mar2011- | 5737  | 533.82  | 16.26677 | 2 K.TNIYTILTI chr5@1329 | 1.46E-10 | 0.003117 |
| 1Mar2011- | 20754 | 1175.12 | 6.371728 | 2 K.INWAVTI chr4@2890   | 2.00E-24 | 0        |
| 1Mar2011- | 20198 | 1147.25 | 13.44098 | 3 R.FQSAAIG Splice@chr  | 2.07E-17 | 0        |
| 1Mar2011- | 13795 | 888.47  | 22.8338  | 2 K.DITLEVEA Splice@chr | 1.08E-15 | 0        |
| 1Mar2011- | 13853 | 888.47  | 22.8338  | 2 K.DITLEVEA Splice@chr | 8.81E-16 | 0        |
| 1Mar2011- | 8508  | 1017.59 | -22.5744 | 1 R.SSVIMLIV chr2@5767  | 6.16E-11 | 0.001523 |
| 1Mar2011- | 20199 | 688.75  | 8.895763 | 5 R.FQSAAIG Splice@chr  | 5.74E-11 | 0.001404 |
| 1Mar2011- | 18455 | 805.47  | -13.7324 | 2 K.TPIFIPAP: chr5@1861 | 9.61E-11 | 0.002098 |
| 1Mar2011- | 20918 | 1040.9  | 3.834672 | 3 E.LFQIIVM: chr2@1065  | 9.42E-11 | 0.002098 |
| 1Mar2011- | 20742 | 1175.13 | 14.90082 | 2 K.INWAVTI chr4@2890   | 1.87E-22 | 0        |
| 1Mar2011- | 8450  | 1017.59 | -22.5744 | 1 R.SSVIMLIV chr2@5767  | 1.88E-11 | 9.49E-04 |
| 1Mar2011- | 15522 | 946.96  | -27.9189 | 2 K.MWMNV Splice@chr    | 3.22E-10 | 0.007648 |
| 1Mar2011- | 9075  | 886     | 3.172487 | 2 F.ENVEVII Splice@chr  | 1.59E-12 | 0        |
| 1Mar2011- | 20179 | 860.69  | 14.08015 | 4 R.FQSAAIG Splice@chr  | 2.61E-15 | 0        |
| 1Mar2011- | 15740 | 1187.58 | 10.28775 | 3 R.NGAPPS: Splice@chr  | 1.97E-10 | 0.004589 |
| 1Mar2011- | 9040  | 439.91  | -1.85417 | 3 K.VAGSGSL chr5@1747   | 3.85E-10 | 0.008842 |
| 1Mar2011- | 11932 | 838.94  | -22.1914 | 2 R.QFADLPS chr5@1898   | 1.57E-10 | 0.00335  |
| 1Mar2011- | 17616 | 1007.86 | 15.19559 | 3 R.CWNRRRA Splice@chr  | 4.23E-11 | 0.001285 |
| 1Mar2011- | 5574  | 533.82  | 16.26677 | 2 K.TNIYTILTI chr5@1329 | 3.58E-10 | 0.0083   |
| 1Mar2011- | 8462  | 509.3   | -20.473  | 2 R.SSVIMLIV chr2@5767  | 8.90E-11 | 0.001985 |
| 1Mar2011- | 20176 | 1147.25 | 13.44098 | 3 R.FQSAAIG Splice@chr  | 1.90E-15 | 0        |
| 1Mar2011- | 14027 | 888.97  | 20.94366 | 2 K.DITLEVEA Splice@chr | 1.18E-13 | 0        |
| 1Mar2011- | 11418 | 780.03  | -24.5321 | 3 ?.AQDNYM Splice@chr   | 3.69E-12 | 1.84E-04 |
| 1Mar2011- | 17738 | 1097.23 | 11.82664 | 3 K.DKPFPSI Splice@chr  | 4.71E-11 | 0.001483 |
| 1Mar2011- | 2146  | 490.3   | -18.6278 | 3 R.LIKHTLGL chr1@8532  | 4.99E-11 | 0.001483 |
| 1Mar2011- | 11368 | 780.03  | -24.5321 | 3 ?.AQDNYM Splice@chr   | 4.20E-11 | 0.001176 |
| 1Mar2011- | 13986 | 899.47  | 5.842265 | 2 R.SKNKK+1 chrX@1700   | 3.44E-10 | 0.009239 |
| 1Mar2011- | 12058 | 563.86  | -24.1467 | 2 R.QNK+14. Splice@chr  | 1.05E-10 | 0.003323 |
| 1Mar2011- | 14357 | 825.95  | 6.510915 | 2 _K+14.016 Splice@chr  | 3.38E-11 | 8.54E-04 |
| 1Mar2011- | 4368  | 533.82  | 16.26677 | 2 K.TNIYTILTI chr5@1329 | 3.15E-10 | 0.008406 |

|           |       |         |          |                         |          |          |
|-----------|-------|---------|----------|-------------------------|----------|----------|
| 1Mar2011- | 18601 | 783.75  | 7.307848 | 3 K.INWAVTI chr4@2890   | 1.15E-15 | 0        |
| 1Mar2011- | 18603 | 1175.13 | 14.90082 | 2 K.INWAVTI chr4@2890   | 3.21E-25 | 0        |
| 1Mar2011- | 15745 | 987.51  | 4.289691 | 3 K.KYLFLDNI chr4@1288  | 9.62E-11 | 0.003178 |
| 1Mar2011- | 6753  | 509.3   | -20.473  | 2 R.SSVIMLIV chr2@5767  | 5.33E-11 | 0.001483 |
| 1Mar2011- | 18203 | 860.69  | 14.08015 | 4 R.FQSAAIG Splice@chr  | 1.59E-12 | 1.84E-04 |
| 1Mar2011- | 12282 | 888.47  | 22.8338  | 2 K.DITLEVEA Splice@chr | 4.18E-13 | 0        |
| 1Mar2011- | 16160 | 1096.89 | 6.757706 | 3 K.DKPFFPSI Splice@chr | 2.81E-10 | 0.007714 |
| 1Mar2011- | 18785 | 780.92  | -5.16507 | 4 E.LFQIIVM+ chr2@1065  | 2.85E-11 | 8.54E-04 |
| 1Mar2011- | 12156 | 888.47  | 22.8338  | 2 K.DITLEVEA Splice@chr | 1.79E-15 | 0        |
| 1Mar2011- | 12338 | 888.47  | 22.8338  | 2 K.DITLEVEA Splice@chr | 1.26E-11 | 3.65E-04 |
| 1Mar2011- | 15643 | 812.12  | 14.27915 | 3 A.EITEMLPi Splice@chr | 2.07E-13 | 0        |
| 1Mar2011- | 17665 | 1096.89 | 6.757706 | 3 K.DKPFFPSI Splice@chr | 2.78E-11 | 8.54E-04 |
| 1Mar2011- | 18197 | 1147.25 | 13.44098 | 3 R.FQSAAIG Splice@chr  | 7.06E-17 | 0        |
| 1Mar2011- | 16956 | 975.81  | -5.15613 | 3 K.SGTIFDNI Splice@chr | 3.02E-10 | 0.007985 |
| 1Mar2011- | 4311  | 533.82  | 16.26677 | 2 K.TNIYTILTI chr5@1329 | 3.13E-10 | 0.008274 |
| 1Mar2011- | 10392 | 838.94  | -22.1914 | 2 R.QFADLPS chr5@1898   | 1.46E-10 | 0.004653 |
| 1Mar2011- | 17708 | 1096.89 | 6.757706 | 3 K.DKPFFPSI Splice@chr | 1.59E-11 | 5.29E-04 |
| 1Mar2011- | 1629  | 439.91  | 17.33685 | 3 K.NSQKNPI chr2@3540   | 5.23E-11 | 0.001483 |
| 1Mar2011- | 6869  | 509.3   | -20.473  | 2 R.SSVIMLIV chr2@5767  | 5.35E-11 | 0.001483 |
| 1Mar2011- | 4256  | 533.82  | 16.26677 | 2 K.TNIYTILTI chr5@1329 | 1.57E-10 | 0.004925 |
| 1Mar2011- | 3874  | 693.87  | -6.6949  | 2 V.ICVAVGD chr5@1063   | 4.50E-11 | 0.001342 |
| 1Mar2011- | 293   | 665.38  | -3.2154  | 2 R.QLQM+1 chr5@7160    | 1.40E-10 | 0.004353 |
| 1Mar2011- | 4498  | 534.32  | 13.11853 | 2 K.TNIYTILTI chr5@1329 | 2.14E-10 | 0.005896 |
| 1Mar2011- | 18178 | 860.69  | 14.08015 | 4 R.FQSAAIG Splice@chr  | 1.21E-12 | 1.84E-04 |
| 1Mar2011- | 16322 | 589.79  | -1.03663 | 2 K.KSEIVNY\ chrX@8559  | 2.58E-10 | 0.007025 |
| 1Mar2011- | 11394 | 1169.54 | -25.4726 | 2 ?.AQDNYM Splice@chr   | 8.55E-15 | 0        |
| 1Mar2011- | 12214 | 888.47  | 22.8338  | 2 K.DITLEVEA Splice@chr | 9.52E-16 | 0        |
| 1Mar2011- | 14414 | 826.45  | 4.477555 | 2 _K+14.016 Splice@chr  | 1.90E-10 | 0.005482 |
| 1Mar2011- | 6810  | 509.3   | -20.473  | 2 R.SSVIMLIV chr2@5767  | 6.68E-11 | 0.002118 |
| 1Mar2011- | 13534 | 848.97  | 0.791766 | 2 R.LLELAPTC chr2@6685  | 9.73E-15 | 0        |
| 1Mar2011- | 17686 | 1096.89 | 6.757706 | 3 K.DKPFFPSI Splice@chr | 8.95E-12 | 1.84E-04 |
| 1Mar2011- | 13475 | 848.97  | 0.791766 | 2 R.LLELAPTC chr2@6685  | 2.33E-16 | 0        |
| 1Mar2011- | 18209 | 1147.25 | 13.44098 | 3 R.FQSAAIG Splice@chr  | 6.68E-13 | 0        |
| 1Mar2011- | 15496 | 1096.89 | 6.757706 | 3 K.DKPFFPSI Splice@chr | 1.06E-11 | 1.84E-04 |
| 1Mar2011- | 18183 | 1147.25 | 13.44098 | 3 R.FQSAAIG Splice@chr  | 1.11E-15 | 0        |
| 1Mar2011- | 18754 | 780.92  | -5.16507 | 4 E.LFQIIVM+ chr2@1065  | 6.50E-11 | 0.001963 |
| 1Mar2011- | 10692 | 854.96  | 28.93022 | 2 _KSFEVAIC Splice@chr  | 2.53E-13 | 0        |
| 1Mar2011- | 15450 | 1097.22 | 2.692596 | 3 K.DKPFFPSI Splice@chr | 7.31E-11 | 0.002266 |
| 1Mar2011- | 3824  | 693.87  | -6.6949  | 2 V.ICVAVGD chr5@1063   | 5.20E-11 | 0.001483 |
| 1Mar2011- | 15156 | 987.51  | 4.289691 | 3 K.KYLFLDNI chr4@1288  | 9.82E-11 | 0.003178 |
| 1Mar2011- | 321   | 743.48  | 2.794988 | 1 K.KIGGAGII chr1@2883  | 8.66E-11 | 0.003486 |
| 1Mar2011- | 12126 | 780.03  | -24.5321 | 3 ?.AQDNYM Splice@chr   | 6.93E-11 | 0.003375 |
| 1Mar2011- | 19748 | 1040.9  | 3.834672 | 3 E.LFQIIVM+ chr2@1065  | 1.70E-10 | 0.005967 |
| 1Mar2011- | 13095 | 888.47  | 22.8338  | 2 K.DITLEVEA Splice@chr | 4.99E-13 | 0        |
| 1Mar2011- | 16902 | 1097.23 | 11.82664 | 3 K.DKPFFPSI Splice@chr | 1.53E-10 | 0.005742 |
| 1Mar2011- | 4524  | 693.87  | -6.6949  | 2 V.ICVAVGD chr5@1063   | 1.49E-10 | 0.00565  |
| 1Mar2011- | 16335 | 987.51  | 4.289691 | 3 K.KYLFLDNI chr4@1288  | 1.28E-10 | 0.005157 |

|           |       |         |          |                         |          |          |
|-----------|-------|---------|----------|-------------------------|----------|----------|
| 1Mar2011- | 18636 | 1096.89 | 6.757706 | 3 K.DKPFPSI Splice@chr  | 3.85E-13 | 0        |
| 1Mar2011- | 16005 | 987.51  | 4.289691 | 3 K.KYLFLDNI chr4@1288  | 8.42E-11 | 0.003486 |
| 1Mar2011- | 12932 | 888.47  | 22.8338  | 2 K.DITLEVEA Splice@chr | 1.46E-16 | 0        |
| 1Mar2011- | 19580 | 1175.12 | 6.371728 | 2 K.INWAVTI chr4@2890   | 1.25E-23 | 0        |
| 1Mar2011- | 456   | 608.27  | 3.316799 | 1 R.FGAGAD, chr1@3416   | 8.13E-11 | 0.003375 |
| 1Mar2011- | 180   | 743.48  | 2.794988 | 1 K.KIGGAGII chr1@2883  | 1.73E-10 | 0.005967 |
| 1Mar2011- | 16713 | 987.51  | 4.289691 | 3 K.KYLFLDNI chr4@1288  | 6.75E-11 | 0.003279 |
| 1Mar2011- | 10900 | 556.86  | -10.3839 | 2 R.QNKIVLIV Splice@chr | 2.28E-10 | 0.006781 |
| 1Mar2011- | 4993  | 533.82  | 16.26677 | 2 K.TNIYTILTI chr5@1329 | 1.93E-10 | 0.006313 |
| 1Mar2011- | 12017 | 780.03  | -24.5321 | 3 ?.AQDNYM Splice@chr   | 4.71E-11 | 0.002042 |
| 1Mar2011- | 6922  | 800.49  | 2.290306 | 1 K.VEAAVAI Splice@chr  | 1.04E-10 | 0.003858 |
| 1Mar2011- | 14393 | 848.97  | 0.791766 | 2 R.LLELAPTC chr2@6685  | 3.61E-18 | 0        |
| 1Mar2011- | 12070 | 780.03  | -24.5321 | 3 ?.AQDNYM Splice@chr   | 2.49E-11 | 0.001062 |
| 1Mar2011- | 18572 | 1096.89 | 6.757706 | 3 K.DKPFPSI Splice@chr  | 2.01E-11 | 0.001062 |
| 1Mar2011- | 18604 | 1096.89 | 6.757706 | 3 K.DKPFPSI Splice@chr  | 1.11E-11 | 8.02E-04 |
| 1Mar2011- | 14343 | 849.47  | -1.18638 | 2 R.LLELAPTC chr2@6685  | 7.08E-17 | 0        |
| 1Mar2011- | 16316 | 1003.19 | 17.13413 | 3 R.CWNRRRA Splice@chr  | 5.42E-12 | 3.41E-04 |
| 1Mar2011- | 13041 | 888.47  | 22.8338  | 2 K.DITLEVEA Splice@chr | 1.22E-14 | 0        |
| 1Mar2011- | 11540 | 854.96  | 28.93022 | 2 _KSFVAIC Splice@chr   | 5.89E-20 | 0        |
| 1Mar2011- | 16357 | 1096.89 | 6.757706 | 3 K.DKPFPSI Splice@chr  | 1.57E-10 | 0.005742 |
| 1Mar2011- | 17623 | 805.97  | -15.8175 | 2 K.TPIFIPAP, chr5@1861 | 1.70E-11 | 9.26E-04 |
| 1Mar2011- | 16305 | 1096.89 | 6.757706 | 3 K.DKPFPSI Splice@chr  | 1.54E-12 | 0        |
| 1Mar2011- | 12084 | 1169.04 | -24.0366 | 2 ?.AQDNYM Splice@chr   | 1.25E-14 | 0        |
| 1Mar2011- | 12984 | 888.47  | 22.8338  | 2 K.DITLEVEA Splice@chr | 5.32E-16 | 0        |
| 1Mar2011- | 460   | 608.27  | 3.316799 | 1 R.FGAGAD, chr1@3416   | 4.06E-11 | 0.001759 |
| 1Mar2011- | 5594  | 509.3   | -20.473  | 2 R.SSVIMLIV chr2@5767  | 1.85E-10 | 0.004207 |
| 1Mar2011- | 17037 | 780.92  | -5.16507 | 4 E.LFQIIVM, chr2@1065  | 1.08E-11 | 1.56E-04 |
| 1Mar2011- | 12152 | 848.97  | 0.791766 | 2 R.LLELAPTC chr2@6685  | 3.94E-17 | 0        |
| 1Mar2011- | 11099 | 888.97  | 20.94366 | 2 K.DITLEVEA Splice@chr | 1.01E-12 | 0        |
| 1Mar2011- | 3140  | 534.32  | 13.11853 | 2 K.TNIYTILTI chr5@1329 | 2.25E-10 | 0.005284 |
| 1Mar2011- | 13914 | 798.15  | -11.5616 | 4 K.SGDAGIV Splice@chr  | 2.72E-10 | 0.006469 |
| 1Mar2011- | 12983 | 826.44  | -7.65642 | 2 _K+14.016 Splice@chr  | 1.92E-11 | 1.56E-04 |
| 1Mar2011- | 10973 | 888.47  | 22.8338  | 2 K.DITLEVEA Splice@chr | 1.25E-15 | 0        |
| 1Mar2011- | 16414 | 860.69  | 14.08015 | 4 R.FQSAAIG Splice@chr  | 2.29E-14 | 0        |
| 1Mar2011- | 13708 | 665.37  | -26.6417 | 2 Q.INNK+14 Splice@chr  | 3.75E-10 | 0.008816 |
| 1Mar2011- | 3504  | 1025.61 | -11.6755 | 1 K.LGLGSGL chr5@4945   | 1.07E-11 | 1.56E-04 |
| 1Mar2011- | 12928 | 732.07  | 19.51873 | 3 R.ATDDWII Splice@chr  | 1.05E-10 | 0.00204  |
| 1Mar2011- | 13746 | 987.51  | 4.289691 | 3 K.KYLFLDNI chr4@1288  | 1.20E-10 | 0.002603 |
| 1Mar2011- | 3013  | 696.37  | -15.3603 | 2 _LPTSPIGC chr5@1204   | 3.66E-10 | 0.008685 |
| 1Mar2011- | 1086  | 756.43  | -9.04908 | 1 R.PLSAAAA chr5@3132   | 2.18E-10 | 0.005148 |
| 1Mar2011- | 10037 | 780.03  | -24.5321 | 3 ?.AQDNYM Splice@chr   | 1.56E-10 | 0.003265 |
| 1Mar2011- | 2980  | 533.82  | 16.26677 | 2 K.TNIYTILTI chr5@1329 | 1.09E-10 | 0.00204  |
| 1Mar2011- | 5174  | 571.86  | -2.35222 | 2 T.KKGDIVIE chr5@1238  | 3.56E-10 | 0.008685 |
| 1Mar2011- | 14091 | 1097.22 | 2.692596 | 3 K.DKPFPSI Splice@chr  | 1.72E-11 | 1.56E-04 |
| 1Mar2011- | 8642  | 556.85  | 26.98454 | 2 R.NKEPNLII chr2@8282  | 1.18E-10 | 0.002603 |
| 1Mar2011- | 15185 | 805.46  | 23.97603 | 2 K.KDQSIRM chr1@8383   | 7.33E-11 | 0.001045 |
| 1Mar2011- | 685   | 700.33  | -11.1714 | 1 R.ENPGAGI chr5@1379   | 1.52E-10 | 0.003127 |

|           |       |         |          |                         |          |          |
|-----------|-------|---------|----------|-------------------------|----------|----------|
| 1Mar2011- | 8589  | 556.85  | 26.98454 | 2 R.NKEPNLII chr2@828   | 2.89E-10 | 0.006716 |
| 1Mar2011- | 17020 | 780.92  | -5.16507 | 4 E.LFQIIVM+ chr2@106   | 1.16E-10 | 0.002468 |
| 1Mar2011- | 13027 | 825.94  | -5.62306 | 2 _K+14.016 Splice@chr  | 4.47E-11 | 4.63E-04 |
| 1Mar2011- | 5307  | 1137.64 | -23.9488 | 1 Q.FLVISFA\ chrX@123   | 3.98E-10 | 0.009338 |
| 1Mar2011- | 10089 | 780.03  | -24.5321 | 3 ?.AQDNYM Splice@chr   | 8.31E-12 | 1.56E-04 |
| 1Mar2011- | 11150 | 592.65  | 24.14055 | 3 K.DITLEVEA Splice@chr | 1.02E-10 | 0.00204  |
| 1Mar2011- | 11154 | 888.47  | 22.8338  | 2 K.DITLEVEA Splice@chr | 8.77E-13 | 0        |
| 1Mar2011- | 16399 | 860.68  | 2.433027 | 4 R.FQSAAIG Splice@chr  | 8.07E-15 | 0        |
| 1Mar2011- | 13786 | 987.51  | 4.289691 | 3 K.KYLFLDNI chr4@128   | 1.65E-10 | 0.003824 |
| 1Mar2011- | 16396 | 1147.25 | 13.44098 | 3 R.FQSAAIG Splice@chr  | 1.43E-17 | 0        |
| 1Mar2011- | 7150  | 661.4   | -2.4954  | 2 K.LVLIAVN\ chr1@652   | 2.00E-10 | 0.004616 |
| 1Mar2011- | 16404 | 688.75  | 8.895763 | 5 R.FQSAAIG Splice@chr  | 2.85E-10 | 0.006716 |
| 1Mar2011- | 5481  | 509.3   | -20.473  | 2 R.SSVIMLIV chr2@576   | 9.61E-11 | 0.001763 |
| 1Mar2011- | 9357  | 854.95  | 17.20129 | 2 _KSFEVAIC Splice@chr  | 4.72E-11 | 9.00E-04 |
| 1Mar2011- | 14051 | 1097.22 | 2.692596 | 3 K.DKPFFPSI Splice@chr | 6.44E-11 | 9.00E-04 |
| 1Mar2011- | 9069  | 838.94  | -22.1914 | 2 R.QFADLPS chr5@189    | 8.95E-11 | 0.001763 |
| 1Mar2011- | 5534  | 509.3   | -20.473  | 2 R.SSVIMLIV chr2@576   | 6.48E-11 | 9.00E-04 |
| 1Mar2011- | 17014 | 1040.89 | -5.8694  | 3 E.LFQIIVM+ chr2@106   | 6.24E-11 | 9.00E-04 |
| 1Mar2011- | 3622  | 1025.61 | -11.6755 | 1 K.LGLGSGL chr5@494    | 4.80E-11 | 9.00E-04 |
| 1Mar2011- | 6407  | 509.3   | -20.473  | 2 R.SSVIMLIV chr2@576   | 1.12E-10 | 0.0037   |
| 1Mar2011- | 15833 | 975.81  | -5.15613 | 3 K.SGTIFDNI Splice@chr | 1.90E-11 | 6.64E-04 |
| 1Mar2011- | 4664  | 1025.61 | -11.6755 | 1 K.LGLGSGL chr5@494    | 4.57E-12 | 3.71E-04 |
| 1Mar2011- | 6460  | 509.3   | -20.473  | 2 R.SSVIMLIV chr2@576   | 6.60E-11 | 0.002128 |
| 1Mar2011- | 16928 | 1147.25 | 13.44098 | 3 R.FQSAAIG Splice@chr  | 2.03E-16 | 0        |
| 1Mar2011- | 6469  | 1017.59 | -22.5744 | 1 R.SSVIMLIV chr2@576   | 2.57E-10 | 0.0084   |
| 1Mar2011- | 17447 | 987.55  | 1.641421 | 2 K.EMINALS chr4@116    | 2.03E-10 | 0.006373 |
| 1Mar2011- | 11365 | 888.97  | 20.94366 | 2 K.DITLEVEA Splice@chr | 3.47E-15 | 0        |
| 1Mar2011- | 8265  | 439.91  | -1.85417 | 3 K.VAGSGSL chr5@174    | 2.76E-10 | 0.009325 |
| 1Mar2011- | 7989  | 661.4   | -2.4954  | 2 K.LVLIAVN\ chr1@652   | 2.56E-10 | 0.00813  |
| 1Mar2011- | 14571 | 1097.23 | 11.82664 | 3 K.DKPFFPSI Splice@chr | 2.94E-10 | 0.009593 |
| 1Mar2011- | 13658 | 825.95  | 6.510915 | 2 _K+14.016 Splice@chr  | 7.99E-11 | 0.002425 |
| 1Mar2011- | 16938 | 1147.25 | 13.44098 | 3 R.FQSAAIG Splice@chr  | 3.71E-16 | 0        |
| 1Mar2011- | 11662 | 888.47  | 22.8338  | 2 K.DITLEVEA Splice@chr | 1.43E-12 | 0        |
| 1Mar2011- | 9726  | 783.93  | -14.2661 | 2 D.FKESEKSI chrX@705   | 2.70E-10 | 0.009218 |
| 1Mar2011- | 13608 | 826.45  | 4.477555 | 2 _K+14.016 Splice@chr  | 3.17E-11 | 0.001109 |
| 1Mar2011- | 4769  | 455.25  | 8.8683   | 3 K.LEAKGGC chr5@129    | 2.33E-10 | 0.007037 |
| 1Mar2011- | 4189  | 533.82  | 16.26677 | 2 K.TNIYTILTI chr5@132  | 1.13E-10 | 0.0037   |
| 1Mar2011- | 11608 | 888.47  | 22.8338  | 2 K.DITLEVEA Splice@chr | 1.63E-13 | 0        |
| 1Mar2011- | 11718 | 888.47  | 22.8338  | 2 K.DITLEVEA Splice@chr | 2.11E-12 | 1.95E-04 |
| 1Mar2011- | 16931 | 860.69  | 14.08015 | 4 R.FQSAAIG Splice@chr  | 1.23E-14 | 0        |
| 1Mar2011- | 16933 | 688.75  | 8.895763 | 5 R.FQSAAIG Splice@chr  | 1.92E-10 | 0.006252 |
| 1Mar2011- | 16920 | 860.69  | 14.08015 | 4 R.FQSAAIG Splice@chr  | 5.31E-14 | 0        |
| 1Mar2011- | 6388  | 582.35  | -7.8392  | 3 K.LERNLSKI chr1@113   | 1.92E-10 | 0.006252 |
| 1Mar2011- | 4613  | 1025.62 | -1.90621 | 1 K.LGLGSGL chr5@494    | 3.33E-11 | 0.001109 |
| 1Mar2011- | 12819 | 849.47  | -1.18638 | 2 R.LLELAPTC chr2@668   | 5.54E-18 | 0        |
| 1Mar2011- | 17497 | 1040.9  | 3.834672 | 3 E.LFQIIVM+ chr2@106   | 8.50E-11 | 0.002711 |
| 1Mar2011- | 1442  | 439.91  | 17.33685 | 3 K.NSQKNPI chr2@354    | 2.24E-10 | 0.00677  |

|           |       |         |          |                         |          |          |
|-----------|-------|---------|----------|-------------------------|----------|----------|
| 1Mar2011- | 6518  | 509.3   | -20.473  | 2 R.SSVIMLIV chr2@5767  | 3.76E-11 | 0.001109 |
| 1Mar2011- | 6579  | 509.3   | -20.473  | 2 R.SSVIMLIV chr2@5767  | 1.35E-10 | 0.004534 |
| 1Mar2011- | 11353 | 826.48  | -13.7526 | 2 R.RVPLPEG Splice@chr  | 5.24E-14 | 0        |
| 1Mar2011- | 16416 | 1096.9  | 15.96601 | 3 K.DKPFFPSI Splice@chr | 8.98E-12 | 6.64E-04 |
| 1Mar2011- | 14546 | 987.51  | 4.289691 | 3 K.KYLFLDNI chr4@1288  | 9.77E-11 | 0.003416 |
| 1Mar2011- | 10669 | 780.03  | -24.5321 | 3 ?.AQDNYM Splice@chr   | 1.50E-10 | 0.00507  |
| 1Mar2011- | 8025  | 583.83  | -11.3703 | 2 R.LVFPITFS chr1@2422  | 2.49E-10 | 0.007857 |
| 1Mar2011- | 9362  | 556.86  | -10.3839 | 2 R.QNKIVLIV Splice@chr | 3.15E-10 | 0.009822 |
| 1Mar2011- | 4084  | 533.82  | 16.26677 | 2 K.TNIYTILTI chr5@1329 | 3.03E-10 | 0.009694 |
| 1Mar2011- | 10718 | 780.03  | -24.5321 | 3 ?.AQDNYM Splice@chr   | 2.32E-11 | 8.11E-04 |
| 1Mar2011- | 14525 | 1097.23 | 11.82664 | 3 K.DKPFFPSI Splice@chr | 1.19E-10 | 0.003817 |
| 1Mar2011- | 6417  | 1017.59 | -22.5744 | 1 R.SSVIMLIV chr2@5767  | 2.03E-10 | 0.006373 |
| 1Mar2011- | 4287  | 533.82  | 16.26677 | 2 K.TNIYTILTI chr5@1329 | 2.73E-10 | 0.007174 |
| 1Mar2011- | 3810  | 693.87  | -6.6949  | 2 V.ICVAVGD chr5@1063   | 2.40E-10 | 0.00559  |
| 1Mar2011- | 11622 | 888.47  | 22.8338  | 2 K.DITLEVEA Splice@chr | 1.01E-15 | 0        |
| 1Mar2011- | 17595 | 1040.9  | 3.834672 | 3 E.LFQIIVM+ chr2@1065  | 2.80E-11 | 9.29E-04 |
| 1Mar2011- | 2848  | 407.74  | 5.852463 | 2 R.ASDIAPIK chrX@1799  | 1.30E-10 | 0.003846 |
| 1Mar2011- | 12782 | 848.97  | 0.791766 | 2 R.LLELAPTC chr2@6685  | 7.83E-17 | 0        |
| 1Mar2011- | 14323 | 987.5   | -5.85708 | 3 K.KYLFLDNI chr4@1288  | 1.13E-10 | 0.003444 |
| 1Mar2011- | 7958  | 657.04  | -26.9179 | 3 R.GNVRK+1 chrX@7490   | 4.43E-11 | 0.001357 |
| 1Mar2011- | 12579 | 722.45  | -4.95112 | 2 R.RK+14.01 Splice@chr | 3.35E-10 | 0.008171 |
| 1Mar2011- | 11800 | 592.65  | 24.14055 | 3 K.DITLEVEA Splice@chr | 3.24E-10 | 0.00791  |
| 1Mar2011- | 11770 | 888.97  | 20.94366 | 2 K.DITLEVEA Splice@chr | 7.90E-13 | 0        |
| 1Mar2011- | 8796  | 748.73  | -12.625  | 3 R.LPSKENL\ chr4@5639  | 1.07E-10 | 0.003167 |
| 1Mar2011- | 16973 | 688.75  | 8.895763 | 5 R.FQSAAIG Splice@chr  | 1.04E-11 | 6.66E-04 |
| 1Mar2011- | 17615 | 1040.9  | 3.834672 | 3 E.LFQIIVM+ chr2@1065  | 3.04E-11 | 9.29E-04 |
| 1Mar2011- | 8113  | 661.4   | -2.4954  | 2 K.LVLIAVN1 chr1@6528  | 2.24E-10 | 0.005485 |
| 1Mar2011- | 16957 | 688.75  | 8.895763 | 5 R.FQSAAIG Splice@chr  | 2.76E-10 | 0.007295 |
| 1Mar2011- | 11713 | 888.97  | 20.94366 | 2 K.DITLEVEA Splice@chr | 1.44E-13 | 0        |
| 1Mar2011- | 14533 | 987.51  | 4.289691 | 3 K.KYLFLDNI chr4@1288  | 1.01E-10 | 0.003034 |
| 1Mar2011- | 4341  | 533.82  | 16.26677 | 2 K.TNIYTILTI chr5@1329 | 1.59E-10 | 0.004204 |
| 1Mar2011- | 380   | 743.48  | 2.794988 | 1 K.KIGGAGII chr1@2883  | 1.73E-10 | 0.0043   |
| 1Mar2011- | 4232  | 533.82  | 16.26677 | 2 K.TNIYTILTI chr5@1329 | 2.33E-10 | 0.00559  |
| 1Mar2011- | 11565 | 888.47  | 22.8338  | 2 K.DITLEVEA Splice@chr | 3.98E-16 | 0        |
| 1Mar2011- | 6148  | 400.75  | 5.038673 | 2 K.VEA AVAI Splice@chr | 1.03E-10 | 0.003167 |
| 1Mar2011- | 10773 | 780.03  | -24.5321 | 3 ?.AQDNYM Splice@chr   | 8.49E-11 | 0.002329 |
| 1Mar2011- | 10771 | 664.7   | 27.08325 | 3 R.TPLPDIN\ chr4@1088  | 2.04E-10 | 0.004829 |
| 1Mar2011- | 4590  | 717.89  | -17.2831 | 2 K.LRGWNK chr3@8881    | 3.54E-10 | 0.008678 |
| 1Mar2011- | 4645  | 502.78  | -8.08894 | 2 _.LPFPNK+ chr3@9211   | 2.46E-10 | 0.00559  |
| 1Mar2011- | 8911  | 833.91  | -7.14778 | 2 _.IDM+15.5 chrX@3237  | 6.05E-11 | 0.001789 |
| 1Mar2011- | 8208  | 472.29  | -0.64754 | 2 _.SPLFVPKI chrX@4402  | 3.83E-10 | 0.009169 |
| 1Mar2011- | 12728 | 848.97  | 0.791766 | 2 R.LLELAPTC chr2@6685  | 2.33E-16 | 0        |
| 1Mar2011- | 10341 | 855.41  | -22.1447 | 2 _.HVQEVAI Splice@chr  | 4.04E-10 | 0.009803 |
| 1Mar2011- | 8970  | 833.91  | -7.14778 | 2 _.IDM+15.5 chrX@3237  | 4.04E-11 | 0.001357 |
| 1Mar2011- | 8011  | 657.04  | -26.9179 | 3 R.GNVRK+1 chrX@7490   | 5.38E-11 | 0.001494 |
| 1Mar2011- | 13628 | 825.95  | 6.510915 | 2 _.K+14.016 Splice@chr | 1.85E-11 | 9.29E-04 |
| 1Mar2011- | 6706  | 509.3   | -20.473  | 2 R.SSVIMLIV chr2@5767  | 6.56E-11 | 0.001905 |

|           |       |         |          |                         |          |          |
|-----------|-------|---------|----------|-------------------------|----------|----------|
| 1Mar2011- | 1003  | 562.31  | -13.4391 | 2 R.FYLLYLYK Splice@chr | 5.70E-11 | 0.001494 |
| 1Mar2011- | 10660 | 664.7   | 1.197202 | 3 _PTLNK+1 chr1@6526    | 3.15E-10 | 0.00791  |
| 1Mar2011- | 11513 | 888.47  | 22.8338  | 2 K.DITLEVEA Splice@chr | 8.81E-16 | 0        |
| 1Mar2011- | 10826 | 780.03  | -24.5321 | 3 ?.AQDNYM Splice@chr   | 4.42E-11 | 0.001357 |
| 1Mar2011- | 13174 | 946.96  | -27.9189 | 2 K.MWMNV Splice@chr    | 1.43E-11 | 9.29E-04 |
| 1Mar2011- | 10226 | 854.96  | 28.93022 | 2 _KSFEVAIC Splice@chr  | 3.73E-16 | 0        |
| 1Mar2011- | 4508  | 533.82  | 16.26677 | 2 K.TNIYTILTI chr5@1329 | 3.27E-10 | 0.00791  |
| 1Mar2011- | 17578 | 987.55  | 1.641421 | 2 K.EMINALS chr4@1164   | 2.87E-10 | 0.007423 |
| 1Mar2011- | 3581  | 617.33  | 16.27136 | 1 R.NVGGGG Splice@chr   | 1.91E-10 | 0.004433 |
| 1Mar2011- | 6651  | 509.3   | -20.473  | 2 R.SSVIMLIV chr2@5767  | 1.42E-10 | 0.004204 |
| 1Mar2011- | 11448 | 592.65  | 24.14055 | 3 K.DITLEVEA Splice@chr | 3.20E-10 | 0.009145 |
| 1Mar2011- | 12409 | 849.47  | -1.18638 | 2 R.LLELAPTC chr2@6685  | 1.81E-17 | 0        |
| 1Mar2011- | 629   | 494.3   | -22.5391 | 2 K.VIESVKRF chr4@6475  | 1.60E-10 | 0.004699 |
| 1Mar2011- | 11422 | 888.47  | 22.8338  | 2 K.DITLEVEA Splice@chr | 4.65E-13 | 0        |
| 1Mar2011- | 13159 | 826.45  | 4.477555 | 2 _K+14.016 Splice@chr  | 5.51E-11 | 0.001185 |
| 1Mar2011- | 13980 | 987.51  | 4.289691 | 3 K.KYLFLDNI chr4@1288  | 3.30E-10 | 0.009265 |
| 1Mar2011- | 10439 | 780.03  | -24.5321 | 3 ?.AQDNYM Splice@chr   | 1.40E-10 | 0.004302 |
| 1Mar2011- | 11392 | 592.98  | 16.54196 | 3 K.DITLEVEA Splice@chr | 2.27E-11 | 3.58E-04 |
| 1Mar2011- | 619   | 494.3   | -22.5391 | 2 K.VIESVKRF chr4@6475  | 1.58E-10 | 0.004699 |
| 1Mar2011- | 11338 | 592.65  | 24.14055 | 3 K.DITLEVEA Splice@chr | 1.68E-11 | 3.58E-04 |
| 1Mar2011- | 11311 | 888.97  | 20.94366 | 2 K.DITLEVEA Splice@chr | 1.15E-15 | 0        |
| 1Mar2011- | 16572 | 860.69  | 14.08015 | 4 R.FQSAAIG Splice@chr  | 9.85E-14 | 0        |
| 1Mar2011- | 4281  | 533.82  | 16.26677 | 2 K.TNIYTILTI chr5@1329 | 2.00E-10 | 0.005419 |
| 1Mar2011- | 4634  | 455.25  | 8.8683   | 3 K.LEAKGGC chr5@1298   | 1.25E-10 | 0.004021 |
| 1Mar2011- | 14412 | 812.12  | 14.27915 | 3 A.EITEMLPi Splice@chr | 5.83E-12 | 0        |
| 1Mar2011- | 11286 | 592.65  | 24.14055 | 3 K.DITLEVEA Splice@chr | 6.02E-12 | 0        |
| 1Mar2011- | 15873 | 968.13  | 18.26018 | 3 _GCSIVPIS Splice@chr  | 1.71E-10 | 0.004845 |
| 1Mar2011- | 10332 | 780.03  | -24.5321 | 3 ?.AQDNYM Splice@chr   | 9.19E-11 | 0.002792 |
| 1Mar2011- | 3896  | 533.82  | 16.26677 | 2 K.TNIYTILTI chr5@1329 | 3.42E-10 | 0.009693 |
| 1Mar2011- | 11222 | 592.65  | 24.14055 | 3 K.DITLEVEA Splice@chr | 5.24E-11 | 0.001027 |
| 1Mar2011- | 16735 | 828.38  | -20.1128 | 2 K.PNLK+14 chr2@3862   | 5.89E-11 | 0.001185 |
| 1Mar2011- | 11365 | 888.47  | 22.8338  | 2 K.DITLEVEA Splice@chr | 2.15E-13 | 0        |
| 1Mar2011- | 11154 | 888.97  | 20.94366 | 2 K.DITLEVEA Splice@chr | 1.53E-15 | 0        |
| 1Mar2011- | 5819  | 560.94  | -12.2507 | 3 _EMFSAA\ chr4@3419    | 1.63E-10 | 0.004699 |
| 1Mar2011- | 14185 | 987.51  | 4.289691 | 3 K.KYLFLDNI chr4@1288  | 3.13E-10 | 0.008998 |
| 1Mar2011- | 3013  | 489.28  | 28.87637 | 2 R.RGTASRS chr5@1951   | 1.17E-11 | 0        |
| 1Mar2011- | 6611  | 558.3   | -2.40945 | 3 R.EK+14.01 chr1@1077  | 7.31E-12 | 0        |
| 1Mar2011- | 10278 | 664.36  | -7.23808 | 3 _PTLNK+1 chr1@6526    | 1.67E-10 | 0.004699 |
| 1Mar2011- | 3653  | 693.87  | -6.6949  | 2 V.ICVAVGD chr5@1065   | 5.42E-11 | 0.001185 |
| 1Mar2011- | 16563 | 1147.25 | 13.44098 | 3 R.FQSAAIG Splice@chr  | 1.27E-17 | 0        |
| 1Mar2011- | 16564 | 860.69  | 14.08015 | 4 R.FQSAAIG Splice@chr  | 2.83E-14 | 0        |
| 1Mar2011- | 17055 | 658.69  | -17.4855 | 3 K.EMINALS chr4@1164   | 2.68E-10 | 0.008323 |
| 1Mar2011- | 9914  | 855.41  | -22.1447 | 2 _HVQEVAI Splice@chr   | 1.54E-11 | 1.86E-04 |
| 1Mar2011- | 10380 | 780.03  | -24.5321 | 3 ?.AQDNYM Splice@chr   | 2.38E-11 | 3.58E-04 |
| 1Mar2011- | 15076 | 860.69  | 14.08015 | 4 R.FQSAAIG Splice@chr  | 1.02E-15 | 0        |
| 1Mar2011- | 10348 | 888.47  | 22.8338  | 2 K.DITLEVEA Splice@chr | 2.77E-15 | 0        |
| 1Mar2011- | 13164 | 987.5   | -5.85708 | 3 K.KYLFLDNI chr4@1288  | 2.00E-10 | 0.005075 |

|           |       |         |          |                         |          |          |
|-----------|-------|---------|----------|-------------------------|----------|----------|
| 1Mar2011- | 3931  | 1025.61 | -11.6755 | 1 K.LGLGSGL chr5@4945   | 4.02E-11 | 0.001166 |
| 1Mar2011- | 7061  | 661.4   | -2.4954  | 2 K.LVLIAVN1 chr1@6528  | 2.42E-10 | 0.005778 |
| 1Mar2011- | 11373 | 848.97  | 0.791766 | 2 R.LLELAPTC chr2@6685  | 2.83E-15 | 0        |
| 1Mar2011- | 9582  | 780.03  | -24.5321 | 3 ?.AQDNYM Splice@chr   | 5.62E-11 | 0.001331 |
| 1Mar2011- | 3611  | 533.82  | 16.26677 | 2 K.TNIYTILTI chr5@1329 | 3.66E-10 | 0.009357 |
| 1Mar2011- | 10410 | 888.47  | 22.8338  | 2 K.DITLEVEA Splice@chr | 3.29E-12 | 3.63E-04 |
| 1Mar2011- | 10450 | 592.98  | 16.54196 | 3 K.DITLEVEA Splice@chr | 4.99E-12 | 3.63E-04 |
| 1Mar2011- | 5632  | 509.3   | -20.473  | 2 R.SSVIMLIV chr2@5767  | 7.93E-11 | 0.002268 |
| 1Mar2011- | 9537  | 780.03  | -24.5321 | 3 ?.AQDNYM Splice@chr   | 1.06E-10 | 0.003188 |
| 1Mar2011- | 3321  | 533.82  | 16.26677 | 2 K.TNIYTILTI chr5@1329 | 3.15E-10 | 0.007944 |
| 1Mar2011- | 4708  | 496.3   | 9.488848 | 2 R.EIKLFDVK Splice@chr | 2.84E-10 | 0.00724  |
| 1Mar2011- | 10298 | 888.47  | 22.8338  | 2 K.DITLEVEA Splice@chr | 8.08E-16 | 0        |
| 1Mar2011- | 13318 | 987.51  | 4.289691 | 3 K.KYLFLDNI chr4@1288  | 1.75E-10 | 0.004022 |
| 1Mar2011- | 10253 | 888.47  | 22.8338  | 2 K.DITLEVEA Splice@chr | 8.48E-16 | 0        |
| 1Mar2011- | 10462 | 888.47  | 22.8338  | 2 K.DITLEVEA Splice@chr | 7.86E-13 | 2.13E-04 |
| 1Mar2011- | 13058 | 1003.19 | 17.13413 | 3 R.CWNRRRA Splice@chr  | 9.91E-13 | 2.13E-04 |
| 1Mar2011- | 5642  | 1017.59 | -22.5744 | 1 R.SSVIMLIV chr2@5767  | 3.86E-11 | 0.001166 |
| 1Mar2011- | 10306 | 592.65  | 24.14055 | 3 K.DITLEVEA Splice@chr | 9.85E-12 | 3.63E-04 |
| 1Mar2011- | 8714  | 838.94  | -22.1914 | 2 R.QFADLPS chr5@1898   | 3.21E-10 | 0.00824  |
| 1Mar2011- | 8653  | 838.94  | -22.1914 | 2 R.QFADLPS chr5@1898   | 1.88E-10 | 0.004476 |
| 1Mar2011- | 7327  | 661.4   | -2.4954  | 2 K.LVLIAVN1 chr1@6528  | 3.41E-10 | 0.00881  |
| 1Mar2011- | 13050 | 987.5   | -5.85708 | 3 K.KYLFLDNI chr4@1288  | 3.15E-10 | 0.007944 |
| 1Mar2011- | 15059 | 1147.25 | 13.44098 | 3 R.FQSAAIG Splice@chr  | 2.25E-16 | 0        |
| 1Mar2011- | 11462 | 592.65  | 24.14055 | 3 K.DITLEVEA Splice@chr | 5.21E-11 | 0.001102 |
| 1Mar2011- | 11517 | 592.65  | 24.14055 | 3 K.DITLEVEA Splice@chr | 1.64E-11 | 3.38E-04 |
| 1Mar2011- | 13759 | 665.37  | -26.6417 | 2 Q.INNK+14 Splice@chr  | 4.65E-10 | 0.009738 |
| 1Mar2011- | 16011 | 688.75  | 8.895763 | 5 R.FQSAAIG Splice@chr  | 1.88E-11 | 8.34E-04 |
| 1Mar2011- | 4553  | 534.32  | 13.11853 | 2 K.TNIYTILTI chr5@1329 | 2.73E-10 | 0.005383 |
| 1Mar2011- | 16025 | 688.75  | 8.895763 | 5 R.FQSAAIG Splice@chr  | 1.12E-10 | 0.001936 |
| 1Mar2011- | 9960  | 618.32  | 1.155298 | 3 K.LTNLSTA Splice@chr  | 3.95E-10 | 0.008193 |
| 1Mar2011- | 11148 | 888.97  | 20.94366 | 2 K.DITLEVEA Splice@chr | 2.07E-15 | 0        |
| 1Mar2011- | 13103 | 825.95  | 6.510915 | 2 _K+14.016 Splice@chr  | 9.35E-11 | 0.001361 |
| 1Mar2011- | 10477 | 780.03  | -24.5321 | 3 ?.AQDNYM Splice@chr   | 9.26E-11 | 0.001361 |
| 1Mar2011- | 16448 | 1040.9  | 3.834672 | 3 E.LFQIIVM1 chr2@1065  | 3.26E-10 | 0.006588 |
| 1Mar2011- | 4706  | 1025.62 | -1.90621 | 1 K.LGLGSGL chr5@4945   | 2.37E-11 | 9.83E-04 |
| 1Mar2011- | 13718 | 665.37  | -26.6417 | 2 Q.INNK+14 Splice@chr  | 4.67E-10 | 0.009872 |
| 1Mar2011- | 11255 | 592.65  | 24.14055 | 3 K.DITLEVEA Splice@chr | 5.92E-12 | 1.80E-04 |
| 1Mar2011- | 4398  | 533.82  | 16.26677 | 2 K.TNIYTILTI chr5@1329 | 3.04E-10 | 0.006055 |
| 1Mar2011- | 4347  | 533.82  | 16.26677 | 2 K.TNIYTILTI chr5@1329 | 3.73E-10 | 0.007656 |
| 1Mar2011- | 13776 | 987.51  | 4.289691 | 3 K.KYLFLDNI chr4@1288  | 6.06E-11 | 0.001239 |
| 1Mar2011- | 11401 | 888.47  | 22.8338  | 2 K.DITLEVEA Splice@chr | 7.07E-13 | 0        |
| 1Mar2011- | 16009 | 860.69  | 14.08015 | 4 R.FQSAAIG Splice@chr  | 1.21E-14 | 0        |
| 1Mar2011- | 10525 | 780.03  | -24.5321 | 3 ?.AQDNYM Splice@chr   | 4.92E-11 | 0.001102 |
| 1Mar2011- | 1929  | 587.34  | 11.13845 | 2 R.ARAIEK+ chr4@5939   | 2.86E-10 | 0.005922 |
| 1Mar2011- | 16430 | 987.56  | 11.79291 | 2 K.EMINALS chr4@1164   | 1.47E-10 | 0.002349 |
| 1Mar2011- | 13994 | 987.51  | 4.289691 | 3 K.KYLFLDNI chr4@1288  | 5.02E-11 | 0.001102 |
| 1Mar2011- | 11197 | 888.47  | 22.8338  | 2 K.DITLEVEA Splice@chr | 6.89E-16 | 0        |

|           |       |         |          |                         |          |          |
|-----------|-------|---------|----------|-------------------------|----------|----------|
| 1Mar2011- | 11296 | 888.47  | 22.8338  | 2 K.DITLEVEA Splice@chr | 9.69E-16 | 0        |
| 1Mar2011- | 12711 | 946.46  | -26.1447 | 2 K.MWMNV Splice@chr    | 4.72E-10 | 0.009999 |
| 1Mar2011- | 16022 | 1147.25 | 13.44098 | 3 R.FQSAAIG Splice@chr  | 1.99E-16 | 0        |
| 1Mar2011- | 11452 | 888.47  | 22.8338  | 2 K.DITLEVEA Splice@chr | 1.01E-12 | 0        |
| 1Mar2011- | 9313  | 556.86  | -10.3839 | 2 R.QNKIVLIV Splice@chr | 4.63E-10 | 0.009605 |
| 1Mar2011- | 13150 | 825.95  | 6.510915 | 2 _K+14.016 Splice@chr  | 2.04E-10 | 0.003165 |
| 1Mar2011- | 12333 | 849.47  | -1.18638 | 2 R.LLELAPTC chr2@6685  | 5.06E-17 | 0        |
| 1Mar2011- | 14916 | 805.47  | -13.7324 | 2 K.TPIFIPAP chr5@1861  | 2.30E-11 | 9.83E-04 |
| 1Mar2011- | 11244 | 888.47  | 22.8338  | 2 K.DITLEVEA Splice@chr | 1.06E-15 | 0        |
| 1Mar2011- | 14021 | 1097.23 | 11.82664 | 3 K.DKPFFPSI Splice@chr | 8.93E-11 | 0.001361 |
| 1Mar2011- | 11363 | 592.98  | 16.54196 | 3 K.DITLEVEA Splice@chr | 2.33E-11 | 9.83E-04 |
| 1Mar2011- | 11353 | 888.97  | 20.94366 | 2 K.DITLEVEA Splice@chr | 2.89E-13 | 0        |
| 1Mar2011- | 4856  | 1025.62 | -1.90621 | 1 K.LGLGSL chr5@4945    | 8.21E-12 | 3.38E-04 |
| 1Mar2011- | 5094  | 608.82  | -0.40167 | 2 R.GLPDGN Splice@chr   | 3.33E-11 | 0.001102 |
| 1Mar2011- | 11412 | 592.98  | 16.54196 | 3 K.DITLEVEA Splice@chr | 1.44E-12 | 0        |
| 1Mar2011- | 5870  | 558.3   | -2.40945 | 3 R.EK+14.01 chr1@1077  | 3.19E-11 | 9.62E-04 |
| 1Mar2011- | 10513 | 888.97  | 20.94366 | 2 K.DITLEVEA Splice@chr | 4.94E-14 | 0        |
| 1Mar2011- | 5730  | 509.3   | -20.473  | 2 R.SSVIMLIV chr2@5767  | 9.31E-11 | 0.003831 |
| 1Mar2011- | 10328 | 888.47  | 22.8338  | 2 K.DITLEVEA Splice@chr | 1.70E-15 | 0        |
| 1Mar2011- | 3753  | 534.32  | 13.11853 | 2 K.TNIYTILTI chr5@1325 | 1.79E-10 | 0.006409 |
| 1Mar2011- | 12406 | 825.95  | 6.510915 | 2 _K+14.016 Splice@chr  | 2.03E-10 | 0.007057 |
| 1Mar2011- | 9686  | 780.03  | -24.5321 | 3 ?.AQDNYM Splice@chr   | 2.02E-10 | 0.007057 |
| 1Mar2011- | 3530  | 533.82  | 16.26677 | 2 K.TNIYTILTI chr5@1325 | 2.21E-10 | 0.007216 |
| 1Mar2011- | 15099 | 1096.89 | 6.757706 | 3 K.DKPFFPSI Splice@chr | 1.74E-11 | 4.04E-04 |
| 1Mar2011- | 5625  | 509.3   | -20.473  | 2 R.SSVIMLIV chr2@5767  | 5.33E-11 | 0.001321 |
| 1Mar2011- | 10574 | 592.65  | 24.14055 | 3 K.DITLEVEA Splice@chr | 4.93E-11 | 0.001321 |
| 1Mar2011- | 10525 | 592.65  | 24.14055 | 3 K.DITLEVEA Splice@chr | 9.59E-11 | 0.004004 |
| 1Mar2011- | 11646 | 848.97  | 0.791766 | 2 R.LLELAPTC chr2@6685  | 1.52E-15 | 0        |
| 1Mar2011- | 9629  | 780.03  | -24.5321 | 3 ?.AQDNYM Splice@chr   | 1.22E-10 | 0.004306 |
| 1Mar2011- | 11592 | 849.47  | -1.18638 | 2 R.LLELAPTC chr2@6685  | 4.26E-17 | 0        |
| 1Mar2011- | 10428 | 888.47  | 22.8338  | 2 K.DITLEVEA Splice@chr | 2.27E-15 | 0        |
| 1Mar2011- | 13507 | 987.84  | -0.22613 | 3 K.KYLFLDNI chr4@1288  | 1.61E-10 | 0.005975 |
| 1Mar2011- | 10565 | 888.47  | 22.8338  | 2 K.DITLEVEA Splice@chr | 1.01E-12 | 0        |
| 1Mar2011- | 10377 | 888.47  | 22.8338  | 2 K.DITLEVEA Splice@chr | 1.99E-15 | 0        |
| 1Mar2011- | 10688 | 592.65  | 24.14055 | 3 K.DITLEVEA Splice@chr | 8.75E-12 | 2.10E-04 |
| 1Mar2011- | 15454 | 860.69  | 14.08015 | 4 R.FQSAAIG Splice@chr  | 1.01E-13 | 0        |
| 1Mar2011- | 5675  | 509.3   | -20.473  | 2 R.SSVIMLIV chr2@5767  | 2.66E-11 | 7.91E-04 |
| 1Mar2011- | 15428 | 860.69  | 14.08015 | 4 R.FQSAAIG Splice@chr  | 6.58E-13 | 0        |
| 1Mar2011- | 3587  | 533.82  | 16.26677 | 2 K.TNIYTILTI chr5@1325 | 2.68E-10 | 0.009679 |
| 1Mar2011- | 10414 | 592.65  | 24.14055 | 3 K.DITLEVEA Splice@chr | 7.42E-14 | 0        |
| 1Mar2011- | 13046 | 665.37  | -26.6417 | 2 Q.INNK+14 Splice@chr  | 2.74E-10 | 0.009839 |
| 1Mar2011- | 15438 | 1147.25 | 13.44098 | 3 R.FQSAAIG Splice@chr  | 2.32E-15 | 0        |
| 1Mar2011- | 15839 | 987.55  | 1.641421 | 2 K.EMINALS chr4@1164   | 1.92E-12 | 0        |
| 1Mar2011- | 15848 | 780.92  | -5.16507 | 4 E.LFQIIVM chr2@1065   | 1.48E-10 | 0.005485 |
| 1Mar2011- | 13362 | 1096.89 | 6.757706 | 3 K.DKPFFPSI Splice@chr | 2.22E-11 | 5.97E-04 |
| 1Mar2011- | 8981  | 780.03  | -24.5321 | 3 ?.AQDNYM Splice@chr   | 4.99E-12 | 9.56E-04 |
| 1Mar2011- | 14922 | 1096.89 | 6.757706 | 3 K.DKPFFPSI Splice@chr | 6.66E-11 | 0.002106 |

|           |       |         |          |                         |          |          |
|-----------|-------|---------|----------|-------------------------|----------|----------|
| 1Mar2011- | 10016 | 592.65  | 24.14055 | 3 K.DITLEVEA Splice@chr | 6.13E-11 | 0.002106 |
| 1Mar2011- | 13107 | 987.51  | 4.289691 | 3 K.KYLFLDNI chr4@1288  | 2.95E-10 | 0.009262 |
| 1Mar2011- | 9818  | 888.47  | 22.8338  | 2 K.DITLEVEA Splice@chr | 2.44E-16 | 0        |
| 1Mar2011- | 15507 | 860.69  | 14.08015 | 4 R.FQSAAIG Splice@chr  | 1.73E-14 | 0        |
| 1Mar2011- | 9922  | 888.47  | 22.8338  | 2 K.DITLEVEA Splice@chr | 2.23E-14 | 0        |
| 1Mar2011- | 11932 | 826.45  | 4.477555 | 2 _K+14.016 Splice@chr  | 9.05E-11 | 0.002754 |
| 1Mar2011- | 11123 | 848.97  | 0.791766 | 2 R.LLELAPTC chr2@6685  | 3.46E-15 | 0        |
| 1Mar2011- | 1572  | 439.91  | -1.85417 | 3 K.VAGSGSL chr5@1747   | 1.58E-10 | 0.005658 |
| 1Mar2011- | 5230  | 509.3   | -20.473  | 2 R.SSVIMLIV chr2@5767  | 1.75E-10 | 0.006108 |
| 1Mar2011- | 9770  | 965.52  | 17.33925 | 4 R.K+14.016 chr5@2085  | 3.05E-10 | 0.009729 |
| 1Mar2011- | 9966  | 592.65  | 24.14055 | 3 K.DITLEVEA Splice@chr | 1.21E-10 | 0.003733 |
| 1Mar2011- | 9974  | 888.97  | 20.94366 | 2 K.DITLEVEA Splice@chr | 6.10E-14 | 0        |
| 1Mar2011- | 9869  | 888.47  | 22.8338  | 2 K.DITLEVEA Splice@chr | 1.76E-15 | 0        |
| 1Mar2011- | 5339  | 509.3   | -20.473  | 2 R.SSVIMLIV chr2@5767  | 8.05E-11 | 0.002754 |
| 1Mar2011- | 5281  | 509.3   | -20.473  | 2 R.SSVIMLIV chr2@5767  | 4.54E-11 | 0.0018   |
| 1Mar2011- | 11069 | 848.97  | 0.791766 | 2 R.LLELAPTC chr2@6685  | 5.07E-16 | 0        |
| 1Mar2011- | 14114 | 805.97  | -15.8175 | 2 K.TPIFIPAP chr5@1861  | 1.17E-10 | 0.003565 |
| 1Mar2011- | 15263 | 929.16  | -18.1332 | 3 R.KSTAKLK chr2@8595   | 1.63E-10 | 0.005816 |
| 1Mar2011- | 9854  | 592.65  | 24.14055 | 3 K.DITLEVEA Splice@chr | 5.72E-13 | 2.24E-04 |
| 1Mar2011- | 10072 | 592.65  | 24.14055 | 3 K.DITLEVEA Splice@chr | 1.27E-10 | 0.004399 |
| 1Mar2011- | 17289 | 1161.58 | -24.6118 | 2 K.YLGAYLL Splice@chr  | 2.54E-13 | 0        |
| 1Mar2011- | 3395  | 439.91  | 17.33685 | 3 K.NSQKNPI chr2@3540   | 2.55E-10 | 0.007394 |
| 1Mar2011- | 10660 | 1080.9  | -7.23447 | 3 K.EIVSTDLE Splice@chr | 8.90E-11 | 0.002067 |
| 1Mar2011- | 17525 | 1147.25 | 13.44098 | 3 R.FQSAAIG Splice@chr  | 2.79E-15 | 0        |
| 1Mar2011- | 16826 | 1096.89 | 6.757706 | 3 K.DKPFFPSI Splice@chr | 1.08E-11 | 4.69E-04 |
| 1Mar2011- | 15271 | 581.57  | 18.95936 | 4 K.YLGAYLL Splice@chr  | 3.07E-14 | 0        |
| 1Mar2011- | 17542 | 860.69  | 14.08015 | 4 R.FQSAAIG Splice@chr  | 1.89E-14 | 0        |
| 1Mar2011- | 11576 | 888.47  | 22.8338  | 2 K.DITLEVEA Splice@chr | 1.50E-15 | 0        |
| 1Mar2011- | 2766  | 564.32  | -22.6447 | 2 K.IFVLKHEN chr5@1811  | 1.15E-10 | 0.002451 |
| 1Mar2011- | 17069 | 962.47  | -16.0654 | 3 R.WFWGQI chr4@3030    | 2.25E-10 | 0.006531 |
| 1Mar2011- | 8875  | 833.91  | -7.14778 | 2 _IDM+15.5 chrX@3237   | 1.66E-10 | 0.004266 |
| 1Mar2011- | 15992 | 634.84  | 6.410455 | 2 R.VDIGDILF Splice@chr | 4.23E-12 | 1.62E-04 |
| 1Mar2011- | 8814  | 833.91  | -7.14778 | 2 _IDM+15.5 chrX@3237   | 1.94E-10 | 0.005664 |
| 1Mar2011- | 14673 | 1096.89 | 6.757706 | 3 K.DKPFFPSI Splice@chr | 2.34E-11 | 7.46E-04 |
| 1Mar2011- | 16131 | 975.81  | -5.15613 | 3 K.SGTIFDNI Splice@chr | 1.73E-10 | 0.004646 |
| 1Mar2011- | 11120 | 622.33  | 9.587405 | 2 R.AK+14.01 chr2@4270  | 1.61E-10 | 0.004134 |
| 1Mar2011- | 3995  | 533.82  | 16.26677 | 2 K.TNIYTILTI chr5@1325 | 2.29E-10 | 0.006654 |
| 1Mar2011- | 11767 | 888.47  | 22.8338  | 2 K.DITLEVEA Splice@chr | 8.82E-13 | 0        |
| 1Mar2011- | 11825 | 888.47  | 22.8338  | 2 K.DITLEVEA Splice@chr | 1.10E-12 | 1.62E-04 |
| 1Mar2011- | 11828 | 592.65  | 24.14055 | 3 K.DITLEVEA Splice@chr | 9.53E-12 | 4.69E-04 |
| 1Mar2011- | 18688 | 910.52  | -11.284  | 1 R.VRLGDPF chr2@6150   | 1.76E-10 | 0.00503  |
| 1Mar2011- | 6445  | 509.3   | -20.473  | 2 R.SSVIMLIV chr2@5767  | 1.66E-10 | 0.004266 |
| 1Mar2011- | 633   | 665.39  | 11.85105 | 2 R.QLQM+1 chr5@7160    | 3.22E-10 | 0.009354 |
| 1Mar2011- | 10138 | 854.96  | 28.93022 | 2 _KSFEVAIC Splice@chr  | 1.83E-13 | 0        |
| 1Mar2011- | 11886 | 592.65  | 24.14055 | 3 K.DITLEVEA Splice@chr | 4.80E-11 | 0.001286 |
| 1Mar2011- | 6502  | 509.3   | -20.473  | 2 R.SSVIMLIV chr2@5767  | 1.61E-10 | 0.004134 |
| 1Mar2011- | 14502 | 987.5   | -5.85708 | 3 K.KYLFLDNI chr4@1288  | 2.74E-10 | 0.007889 |

|            |       |         |          |                          |          |          |
|------------|-------|---------|----------|--------------------------|----------|----------|
| 1Mar2011-  | 13537 | 732.07  | 19.51873 | 3 R.ATDDWII Splice@chr   | 1.82E-10 | 0.005154 |
| 1Mar2011-  | 11177 | 622.33  | 9.587405 | 2 R.AK+14.01 chr2@4270   | 1.06E-10 | 0.002185 |
| 1Mar2011-  | 11523 | 888.47  | 22.8338  | 2 K.DITLEVEA Splice@chr  | 1.06E-15 | 0        |
| 1Mar2011-  | 14724 | 1097.23 | 11.82664 | 3 K.DKPFFPSI Splice@chr  | 2.33E-10 | 0.006902 |
| 1Mar2011-  | 14661 | 987.51  | 4.289691 | 3 K.KYLFLDNI chr4@1288   | 1.13E-10 | 0.002318 |
| 1Mar2011-  | 17505 | 1147.25 | 13.44098 | 3 R.FQSAAIG Splice@chr   | 8.09E-16 | 0        |
| 1Mar2011-  | 17508 | 860.69  | 14.08015 | 4 R.FQSAAIG Splice@chr   | 9.25E-15 | 0        |
| 1Mar2011-  | 11770 | 592.98  | 16.54196 | 3 K.DITLEVEA Splice@chr  | 6.46E-11 | 0.001817 |
| 1Mar2011-  | 16862 | 1096.89 | 6.757706 | 3 K.DKPFFPSI Splice@chr  | 1.97E-11 | 7.46E-04 |
| 1Mar2011-  | 18122 | 1175.12 | 6.371728 | 2 K.INWAVTI chr4@2890    | 8.27E-18 | 0        |
| 1Mar2011-  | 11634 | 888.47  | 22.8338  | 2 K.DITLEVEA Splice@chr  | 1.33E-15 | 0        |
| 1Mar2011-  | 11474 | 888.47  | 22.8338  | 2 K.DITLEVEA Splice@chr  | 6.33E-16 | 0        |
| 1Mar2011-  | 12870 | 848.97  | 0.791766 | 2 R.LLELAPTC chr2@6685   | 1.88E-18 | 0        |
| 1Mar2011-  | 12216 | 592.65  | 24.14055 | 3 K.DITLEVEA Splice@chr  | 2.61E-12 | 0        |
| 1Mar2011-  | 16524 | 634.84  | 6.410455 | 2 R.VDIGDILF Splice@chr  | 3.96E-11 | 0.001417 |
| 1Mar2011-  | 12151 | 888.47  | 22.8338  | 2 K.DITLEVEA Splice@chr  | 1.31E-13 | 0        |
| 1Mar2011-  | 18352 | 860.69  | 14.08015 | 4 R.FQSAAIG Splice@chr   | 3.11E-12 | 0        |
| 1Mar2011-  | 19291 | 1040.9  | 3.834672 | 3 E.LFQIIVM- chr2@1065   | 6.13E-11 | 0.002072 |
| 1Mar2011-  | 16442 | 805.97  | -15.8175 | 2 K.TPIFIPAP- chr5@1861  | 7.90E-11 | 0.002581 |
| 19July2011 | 970   | 474.29  | 19.17373 | 2 R.RSKSMLP chrX@1387    | 2.18E-10 | 0.005396 |
| 1Mar2011-  | 17203 | 987.87  | 6.019879 | 3 K.M+15.99 chr3@1121    | 2.54E-12 | 0        |
| 1Mar2011-  | 10716 | 757.78  | -18.441  | 5 R.DIFCEATI chrX@2511   | 2.83E-10 | 0.008964 |
| 1Mar2011-  | 1776  | 600.41  | 10.5498  | 2 K.KLLVIVCII Splice@chr | 1.02E-10 | 0.00224  |
| 1Mar2011-  | 1725  | 600.41  | 10.5498  | 2 K.KLLVIVCII Splice@chr | 8.29E-11 | 0.002071 |
| 19July2011 | 8333  | 821.92  | 20.349   | 2 W.LTFFFEY chr5@8586    | 2.32E-10 | 0.005554 |
| 1Mar2011-  | 10416 | 521.61  | -7.03432 | 3 R.VSIETDKI Splice@chr  | 8.05E-11 | 0.003532 |
| 1Mar2011-  | 11943 | 588.29  | -16.0047 | 3 K.SSSSPSS chr5@8662    | 3.70E-10 | 0.009338 |
| 1Mar2011-  | 17808 | 1192.55 | -27.8353 | 1 R.TRAYSGN Splice@chr   | 2.30E-10 | 0.005656 |
| 1Mar2011-  | 19923 | 1104.61 | -6.94296 | 2 R.FFFLSFN\ chr3@2576   | 2.50E-10 | 0.00607  |
| 1Mar2011-  | 2585  | 519.29  | 8.714637 | 2 K.SIYGLEISf chr1@4967  | 4.64E-10 | 0.008765 |
| 1Mar2011-  | 1636  | 519.29  | 8.714637 | 2 K.SIYGLEISf chr1@4967  | 1.48E-10 | 0.00478  |
| 1Mar2011-  | 11015 | 611.57  | 9.026555 | 4 _SK+14.01 chrX@9767    | 3.45E-10 | 0.007465 |
| 1Mar2011-  | 15357 | 888.47  | -2.61344 | 2 R.SMVDK+ chr5@6825     | 8.81E-11 | 0.001766 |
| 19July2011 | 8449  | 772.1   | 23.2191  | 3 R.LSRGSLKI chr1@5266   | 3.92E-10 | 0.006938 |
| 1Mar2011-  | 8579  | 490.77  | -21.123  | 2 R.EQNIVHII chr5@3235   | 2.79E-10 | 0.007625 |
| 1Mar2011-  | 10915 | 490.77  | -21.123  | 2 R.EQNIVHII chr5@3235   | 3.61E-10 | 0.008829 |
| 1Mar2011-  | 4412  | 747.91  | 22.03966 | 2 K.KFEVATG chr4@5946    | 1.67E-11 | 5.56E-04 |
| 1Mar2011-  | 14261 | 1010.21 | 2.257874 | 3 K.RPK+14.C chr1@2020   | 4.29E-12 | 0        |
| 1Mar2011-  | 3910  | 530.33  | 11.25536 | 2 R.ARMQRKQ chr2@1104    | 5.22E-10 | 0.009149 |
| 1Mar2011-  | 11794 | 1020.05 | 0.210788 | 2 K.FKRNPQK chrX@1775    | 3.46E-10 | 0.009552 |
| 1Mar2011-  | 13746 | 1020.05 | 0.210788 | 2 K.FKRNPQK chrX@1775    | 1.51E-10 | 0.005792 |
| 1Mar2011-  | 14859 | 902.57  | 17.35302 | 1 R.FIIGPNIK. Splice@chr | 2.72E-10 | 0.006904 |
| 1Mar2011-  | 6297  | 638.85  | -13.5489 | 2 R.TVLVSLSY chr2@1521   | 1.52E-10 | 0.005512 |
| 1Mar2011-  | 11612 | 727     | -27.1263 | 3 R.NFPAIAG chr4@1328    | 2.76E-10 | 0.006801 |
| 19July2011 | 6480  | 775.91  | 20.76984 | 2 Y.FCFFVLIV chr4@7244   | 3.32E-10 | 0.004817 |
| 1Mar2011-  | 7108  | 729.41  | 2.391232 | 2 K.EISFSKK+ chr5@1342   | 1.01E-10 | 0.003178 |
| 19July2011 | 10462 | 564.65  | 11.18979 | 3 K.FLEKSSH1 chr2@1030   | 4.86E-10 | 0.009857 |

|            |       |         |          |                         |          |          |
|------------|-------|---------|----------|-------------------------|----------|----------|
| 1Mar2011-  | 2262  | 622.32  | -9.23409 | 2 L.EGLSPGG chr4@2285   | 2.41E-10 | 0.008551 |
| 1Mar2011-  | 14102 | 665.33  | -19.8122 | 2 R.WSQLNF chrX@3028    | 3.46E-10 | 0.008425 |
| 1Mar2011-  | 555   | 615.39  | -24.7048 | 2 K.KKTKLELL chrX@9901  | 2.26E-10 | 0.005656 |
| 1Mar2011-  | 9396  | 717.35  | -26.8101 | 3 R.FSQQMD Splice@chr   | 2.87E-10 | 0.008964 |
| 1Mar2011-  | 1516  | 525.32  | -3.49229 | 2 R.KLSYGIIQ chr5@1539  | 8.14E-11 | 0.002885 |
| 19July2011 | 7369  | 538.64  | 6.584543 | 3 K.TPTCVPT chr2@4445   | 1.36E-10 | 0.004696 |
| 19July2011 | 1614  | 467.6   | -27.2078 | 3 _ .TEGKTGL Splice@chr | 2.57E-10 | 0.006684 |
| 1Mar2011-  | 7986  | 504.32  | 11.44868 | 3 K.ILFFFLKF chr3@1194  | 4.74E-11 | 8.58E-04 |
| 19July2011 | 2550  | 685.32  | -21.9407 | 2 K.NFFFFEFF Splice@chr | 7.63E-11 | 0.001768 |
| 1Mar2011-  | 13537 | 719.89  | 16.86676 | 2 R.QMDLNN chr1@1295    | 3.12E-10 | 0.006821 |
| 1Mar2011-  | 10508 | 697.69  | -21.7066 | 3 K.FLNK+14. chr4@1894  | 2.87E-10 | 0.008606 |
| 1Mar2011-  | 14727 | 963.98  | -27.2983 | 2 R.VQLYTFE chrX@3795   | 4.18E-10 | 0.008851 |
| 1Mar2011-  | 853   | 423.02  | 24.92904 | 4 K.KFISK+14 chr4@1310  | 1.40E-10 | 0.003603 |
| 1Mar2011-  | 1236  | 524.98  | 26.87004 | 3 K.K+14.016 chrX@5348  | 1.89E-10 | 0.005276 |
| 19July2011 | 3026  | 603.81  | 14.98558 | 2 _ .INLNSPFC chr5@6655 | 3.70E-10 | 0.005731 |
| 1Mar2011-  | 10699 | 1041.04 | -10.4206 | 2 K.EKKAMRI chr1@3014   | 4.30E-10 | 0.009746 |
| 19July2011 | 8476  | 822.44  | 8.990786 | 4 K.AKIKSCLN chr2@1330  | 2.47E-10 | 0.009692 |
| 1Mar2011-  | 6842  | 732.89  | -29.2707 | 2 K.FKIFQKHI chr2@4507  | 4.04E-10 | 0.009506 |
| 1Mar2011-  | 6331  | 724.94  | -6.32326 | 2 P.VKLLHAS Splice@chr  | 1.53E-10 | 0.004925 |
| 1Mar2011-  | 10343 | 657.83  | 15.64165 | 4 K.VETNGKC chr4@1488   | 4.73E-10 | 0.008763 |
| 1Mar2011-  | 10457 | 593.34  | -0.72129 | 2 K.LEIDQVIE chr5@5115  | 3.07E-12 | 1.50E-04 |
| 1Mar2011-  | 9939  | 593.34  | -0.72129 | 2 K.LEIDQVIE chr5@5115  | 1.58E-12 | 0        |
| 19July2011 | 14814 | 867.45  | -6.30706 | 2 R.FWKEFEK Splice@chr  | 1.72E-11 | 0.001217 |
| 1Mar2011-  | 17295 | 763.14  | 20.21827 | 3 K.TK+14.01 chrX@1037  | 9.63E-11 | 0.001691 |
| 1Mar2011-  | 19687 | 763.14  | 20.21827 | 3 K.TK+14.01 chrX@1037  | 2.82E-10 | 0.006965 |
| 1Mar2011-  | 20036 | 763.14  | 20.21827 | 3 K.TK+14.01 chrX@1037  | 2.08E-10 | 0.004833 |
| 1Mar2011-  | 16343 | 763.14  | 20.21827 | 3 K.TK+14.01 chrX@1037  | 5.27E-11 | 0.002103 |
| 19July2011 | 7673  | 713.89  | -26.027  | 2 K.KLVPLPKI chr2@8210  | 3.21E-10 | 0.009768 |
| 1Mar2011-  | 5220  | 602.83  | -18.0145 | 2 K.CRLALCLI chr2@4545  | 1.42E-10 | 0.004346 |
| 1Mar2011-  | 5276  | 602.83  | -18.0145 | 2 K.CRLALCLI chr2@4545  | 1.82E-10 | 0.005538 |
| 1Mar2011-  | 8604  | 623.84  | -29.3709 | 2 R.ITASAEVS Splice@chr | 1.70E-10 | 0.004116 |
| 19July2011 | 386   | 442.22  | 9.073784 | 2 K.YEEGKEK Splice@chr  | 2.01E-10 | 0.009057 |
| 1Mar2011-  | 1898  | 763.47  | -15.0176 | 2 K.KYIIINSK+ chr5@1498 | 1.71E-10 | 0.003512 |
| 1Mar2011-  | 55    | 420.72  | 26.03112 | 2 V.YGVDTTC chr3@1272   | 1.23E-10 | 0.00252  |
| 1Mar2011-  | 32    | 420.72  | 26.03112 | 2 V.YGVDTTC chr3@1272   | 3.56E-10 | 0.007899 |
| 1Mar2011-  | 115   | 420.72  | 26.03112 | 2 V.YGVDTTC chr3@1272   | 1.84E-10 | 0.004534 |
| 1Mar2011-  | 63    | 420.72  | 26.03112 | 2 V.YGVDTTC chr3@1272   | 1.54E-10 | 0.003232 |
| 1Mar2011-  | 82    | 420.72  | 26.03112 | 2 V.YGVDTTC chr3@1272   | 2.86E-10 | 0.008506 |
| 1Mar2011-  | 178   | 421.22  | 22.03448 | 2 V.YGVDTTC chr3@1272   | 2.72E-10 | 0.006906 |
| 1Mar2011-  | 6984  | 591.83  | 16.70011 | 2 K.SPGILHHI chr5@2030  | 3.67E-10 | 0.009357 |
| 19July2011 | 11446 | 816.1   | -25.7432 | 3 K.KEEK+14. chr3@1149  | 2.02E-10 | 0.004527 |
| 1Mar2011-  | 9566  | 1157.58 | -21.7418 | 2 S.LYFPLKIN chr4@1711  | 2.03E-10 | 0.005383 |
| 1Mar2011-  | 16436 | 791.41  | -26.7175 | 2 K.GKK+14.( chr4@2868  | 3.91E-11 | 0.001176 |
| 1Mar2011-  | 18809 | 1035.13 | -22.0536 | 2 R.LK+14.01 chr4@1614  | 2.24E-10 | 0.004846 |
| 1Mar2011-  | 12972 | 459.77  | 26.07713 | 2 R.MVLSQN chr4@5290    | 1.81E-10 | 0.003389 |
| 19July2011 | 15999 | 847.7   | 9.082994 | 4 K.CHEKSNF chr1@1406   | 2.44E-11 | 9.59E-04 |
| 19July2011 | 8976  | 627.02  | -8.03045 | 3 _ .RSPLTPSL chr2@3045 | 1.75E-10 | 0.005107 |

|            |       |         |          |                          |          |          |
|------------|-------|---------|----------|--------------------------|----------|----------|
| 1Mar2011-  | 16119 | 973.13  | 10.40589 | 3 K.AVPFVPI\$ Splice@chr | 1.39E-10 | 0.003067 |
| 1Mar2011-  | 16005 | 973.13  | 10.40589 | 3 K.AVPFVPI\$ Splice@chr | 1.11E-10 | 0.002451 |
| 1Mar2011-  | 17215 | 973.13  | 10.40589 | 3 K.AVPFVPI\$ Splice@chr | 9.05E-11 | 0.002404 |
| 1Mar2011-  | 16268 | 973.13  | 10.40589 | 3 K.AVPFVPI\$ Splice@chr | 1.64E-10 | 0.003691 |
| 1Mar2011-  | 14836 | 973.13  | 10.40589 | 3 K.AVPFVPI\$ Splice@chr | 8.45E-11 | 0.001624 |
| 19July2011 | 13380 | 708.38  | 7.856664 | 3 _ .KNLDVGE Splice@chr  | 2.25E-10 | 0.006335 |
| 1Mar2011-  | 2774  | 477.28  | -17.9948 | 3 K.FNDIVSLI chr3@1336   | 5.61E-11 | 0.001466 |
| 19July2011 | 5489  | 837.96  | 9.626258 | 2 K.SRNRLQ chr5@1145     | 1.71E-10 | 0.004361 |
| 1Mar2011-  | 7763  | 546.81  | -27.0613 | 2 R.ITIIASATF chr5@1635  | 1.14E-10 | 0.002191 |
| 1Mar2011-  | 17130 | 936.52  | 3.36295  | 2 _ .ICFGRNG chr2@7382   | 3.49E-10 | 0.009505 |
| 1Mar2011-  | 1476  | 485.76  | 22.94211 | 2 K.IGANNTS chr1@1466    | 1.88E-10 | 0.004745 |
| 1Mar2011-  | 159   | 535.31  | 16.29583 | 2 K.ENKVKHC chrX@9507    | 3.15E-10 | 0.007545 |
| 19July2011 | 10981 | 595.39  | 18.55276 | 2 _ .K+14.016 chr2@1248  | 3.57E-10 | 0.008471 |
| 1Mar2011-  | 7388  | 598.83  | -25.9317 | 2 R.FVSLIPFF chr5@1515   | 4.01E-10 | 0.007424 |
| 1Mar2011-  | 578   | 529.95  | -8.42745 | 3 K.TK+14.01 chr2@1117   | 9.10E-11 | 0.002499 |
| 1Mar2011-  | 12461 | 479.26  | 6.806515 | 3 _ .QSSQGLF chr5@1001   | 1.76E-10 | 0.00362  |
| 19July2011 | 1017  | 461.23  | 29.07889 | 2 R.MGMDPI Splice@chr    | 4.11E-10 | 0.00933  |
| 1Mar2011-  | 11245 | 1064.5  | 21.96401 | 2 _ .MGCDTT chr5@8588    | 3.69E-10 | 0.008932 |
| 19July2011 | 15978 | 1045.55 | -28.2638 | 2 _ .KKKK+14. chr1@1482  | 4.21E-10 | 0.008925 |
| 19July2011 | 7027  | 518.8   | -16.2666 | 2 R.KVMRYIA Splice@chr   | 3.55E-11 | 7.76E-04 |
| 19July2011 | 872   | 483.59  | -17.4534 | 3 _ .CK+14.01 chr4@4145  | 3.37E-10 | 0.009739 |
| 1Mar2011-  | 10285 | 843.39  | -21.4941 | 2 R.PCFHGDf chrX@1526    | 9.44E-11 | 0.004163 |
| 1Mar2011-  | 7635  | 1002.59 | -20.1884 | 1 R.LVEAIVM chr5@1280    | 1.25E-10 | 0.002575 |
| 19July2011 | 2118  | 669.69  | 4.868119 | 3 R.SRRAACS chr5@1812    | 1.56E-10 | 0.004995 |
| 19July2011 | 11252 | 642.31  | -14.8853 | 3 R.IFEMSHC chr1@1737    | 8.78E-11 | 0.003499 |
| 19July2011 | 7502  | 439.28  | 4.317176 | 2 R.PRVRRPPR chr5@1777   | 1.72E-10 | 0.00574  |
| 1Mar2011-  | 8170  | 546.81  | 6.262324 | 2 _ .LVDRLGE chr2@8088   | 2.51E-10 | 0.005158 |
| 1Mar2011-  | 19773 | 1009.62 | 21.02184 | 1 R.SIRFTRTK chrX@5112   | 3.21E-10 | 0.008409 |
| 1Mar2011-  | 14218 | 1081.6  | -23.026  | 2 R.SNLFFPSI chr1@1094   | 2.55E-10 | 0.006416 |
| 1Mar2011-  | 4469  | 464.27  | 12.59832 | 2 R.RDLGNVf chr1@5557    | 9.93E-11 | 0.003178 |
| 19July2011 | 840   | 495.27  | 3.895994 | 2 R.LLCGELQ chrX@1248    | 2.19E-10 | 0.005078 |
| 1Mar2011-  | 6969  | 729.43  | 24.80273 | 1 K.GAGGRG Splice@chr    | 2.29E-10 | 0.005656 |
| 1Mar2011-  | 9650  | 775.41  | -17.1519 | 2 K.FYVLDLKI chrX@1224   | 1.67E-10 | 0.005855 |
| 1Mar2011-  | 13983 | 1003.55 | 3.837473 | 3 K.M+15.99 chr2@1134    | 1.73E-10 | 0.004143 |
| 1Mar2011-  | 12770 | 811.44  | -10.2423 | 2 R.EIFNFGK- chr4@2282   | 1.38E-10 | 0.003002 |
| 19July2011 | 7470  | 796.75  | -5.19144 | 3 _ .LVYFLCRI Splice@chr | 3.73E-10 | 0.008831 |
| 1Mar2011-  | 2829  | 526.31  | 10.34107 | 2 R.RSLHADK chrX@4684    | 1.22E-10 | 0.003688 |
| 1Mar2011-  | 3786  | 526.31  | 10.34107 | 2 R.RSLHADK chrX@4684    | 3.10E-12 | 5.77E-04 |
| 19July2011 | 2953  | 633.83  | -13.5991 | 2 _ .DLVHLNC chr2@6682   | 2.94E-10 | 0.00756  |
| 1Mar2011-  | 17963 | 943.6   | -10.6562 | 2 K.K+14.016 chr3@5556   | 2.40E-10 | 0.005287 |
| 1Mar2011-  | 19359 | 1048.08 | 7.611739 | 2 _ .RCPWCVI chr3@1147   | 3.12E-11 | 8.37E-04 |
| 1Mar2011-  | 19362 | 1178.58 | -8.7613  | 3 R.YISSSQSS chr4@1416   | 9.28E-11 | 0.002772 |
| 1Mar2011-  | 15955 | 780.44  | -25.6681 | 3 K.ILKK+14.( chr5@1780  | 2.56E-10 | 0.007069 |
| 1Mar2011-  | 18439 | 780.45  | -12.8205 | 3 K.ILKK+14.( chr5@1780  | 3.53E-10 | 0.007899 |
| 1Mar2011-  | 18476 | 780.44  | -25.6681 | 3 K.ILKK+14.( chr5@1780  | 3.60E-10 | 0.007899 |
| 1Mar2011-  | 16619 | 780.45  | -12.8205 | 3 K.ILKK+14.( chr5@1780  | 2.64E-10 | 0.00632  |
| 1Mar2011-  | 15074 | 780.44  | -25.6681 | 3 K.ILKK+14.( chr5@1780  | 6.18E-11 | 0.002312 |

|            |       |         |          |                         |          |          |
|------------|-------|---------|----------|-------------------------|----------|----------|
| 1Mar2011-  | 15040 | 780.45  | -12.8205 | 3 K.ILKK+14.( chr5@1780 | 2.42E-10 | 0.006577 |
| 1Mar2011-  | 15119 | 780.44  | -25.6681 | 3 K.ILKK+14.( chr5@1780 | 2.86E-10 | 0.007625 |
| 1Mar2011-  | 17736 | 780.44  | -25.6681 | 3 K.ILKK+14.( chr5@1780 | 2.80E-10 | 0.007267 |
| 1Mar2011-  | 17813 | 780.45  | -12.8205 | 3 K.ILKK+14.( chr5@1780 | 2.79E-10 | 0.00826  |
| 1Mar2011-  | 17735 | 780.45  | -12.8205 | 3 K.ILKK+14.( chr5@1780 | 2.05E-10 | 0.006694 |
| 1Mar2011-  | 17762 | 936.52  | -1.17436 | 2 K.YSHIKEQI Splice@chr | 2.74E-10 | 0.007568 |
| 1Mar2011-  | 18410 | 1042.03 | 0.03036  | 2 _DWPMHI Splice@chr    | 7.22E-11 | 0.001759 |
| 1Mar2011-  | 15829 | 676.36  | -14.5142 | 2 R.FFLMNKY chr2@1325   | 1.38E-10 | 0.003002 |
| 19July2011 | 555   | 525.28  | -4.83394 | 2 R.AYPSDLA chrX@1715   | 1.98E-10 | 0.004127 |
| 1Mar2011-  | 6227  | 549.8   | -28.3596 | 2 R.VLLCSSL chr1@8384   | 3.46E-10 | 0.008824 |
| 1Mar2011-  | 6173  | 549.8   | -28.3596 | 2 R.VLLCSSL chr1@8384   | 1.77E-10 | 0.004143 |
| 1Mar2011-  | 5586  | 549.8   | -28.3596 | 2 R.VLLCSSL chr1@8384   | 1.18E-10 | 0.004455 |
| 1Mar2011-  | 5536  | 549.8   | -28.3596 | 2 R.VLLCSSL chr1@8384   | 3.68E-10 | 0.00756  |
| 1Mar2011-  | 20087 | 879.94  | -7.34497 | 4 K.LVSANCD chr5@3581   | 3.75E-10 | 0.009297 |
| 1Mar2011-  | 10303 | 847.95  | -24.934  | 2 R.GATQLRS chrX@1935   | 1.64E-10 | 0.004389 |
| 19July2011 | 0     | 434.89  | -13.2785 | 3 R.MKRHSA chr5@1170    | 4.04E-10 | 0.00933  |
| 1Mar2011-  | 10677 | 564.26  | -25.3561 | 2 _LTDFCGLI chr3@5996   | 1.82E-11 | 1.56E-04 |
| 1Mar2011-  | 1278  | 687.87  | -15.0173 | 2 K.KNQK+14 chr4@1655   | 5.36E-11 | 0.001302 |
| 19July2011 | 9512  | 797.4   | -27.0635 | 3 R.YPVSMRI chr3@1082   | 2.06E-10 | 0.003522 |
| 1Mar2011-  | 10080 | 810.93  | 16.17617 | 2 T.M+15.99 chr2@3280   | 2.32E-10 | 0.006237 |
| 1Mar2011-  | 10772 | 602.99  | -24.0627 | 3 _QVETILFI chr3@1065   | 2.31E-10 | 0.007358 |
| 19July2011 | 8815  | 607.32  | 23.15377 | 4 K.FIAMGK+ chr5@7750   | 4.97E-10 | 0.008709 |
| 19July2011 | 6947  | 767.73  | -9.44641 | 3 R.VCVCGGI chr4@1455   | 5.03E-10 | 0.009821 |
| 19July2011 | 7371  | 972.85  | -28.3027 | 3 K.TNK+14.( Splice@chr | 3.41E-10 | 0.009651 |
| 1Mar2011-  | 16145 | 617.87  | -2.52339 | 2 K.KAGIFQT chr3@2444   | 4.45E-10 | 0.008831 |
| 1Mar2011-  | 18570 | 939.55  | 8.974479 | 1 R.K+14.016 Splice@chr | 3.88E-10 | 0.00808  |
| 19July2011 | 4400  | 873.49  | -28.6613 | 2 K.TLNSARN chr2@4808   | 3.20E-10 | 0.006623 |
| 1Mar2011-  | 16156 | 1107.1  | -22.8444 | 2 _KQRRERC Splice@chr   | 1.83E-10 | 0.005207 |
| 1Mar2011-  | 17431 | 920.81  | 22.38487 | 3 R.PSLRTSSI chr4@3731  | 3.09E-10 | 0.007839 |
| 1Mar2011-  | 15080 | 680.68  | -18.0575 | 3 K.IFRYGFPI chr2@8724  | 4.13E-10 | 0.008173 |
| 19July2011 | 7467  | 681.12  | 0.358971 | 4 K.QNCKMF chr3@1138    | 3.01E-10 | 0.007879 |
| 1Mar2011-  | 6715  | 664.4   | -12.1981 | 2 K.ISFFRRL chr4@1546   | 2.76E-10 | 0.008736 |
| 1Mar2011-  | 7427  | 1019.2  | 11.02993 | 3 R.KRSTDAV chr2@1175   | 3.41E-10 | 0.009721 |
| 19July2011 | 5694  | 615.31  | 26.6946  | 3 R.NAM+15 Splice@chr   | 1.77E-10 | 0.005165 |
| 1Mar2011-  | 8341  | 516.29  | -5.96443 | 3 K.K+14.016 chr2@4415  | 1.06E-10 | 0.004163 |
| 1Mar2011-  | 14975 | 1069.19 | -28.177  | 3 R.NSQNFDI chr2@2055   | 1.92E-10 | 0.004315 |
| 1Mar2011-  | 11360 | 624.38  | 8.224613 | 4 K.PEPK+14. chr5@1951  | 3.78E-10 | 0.007989 |
| 1Mar2011-  | 9639  | 538.98  | 14.52234 | 3 R.ATVLPSM chr4@1672   | 1.83E-10 | 0.004207 |
| 19July2011 | 873   | 422.75  | 15.84725 | 2 R.KMPPML Splice@chr   | 1.77E-10 | 0.005214 |
| 1Mar2011-  | 17837 | 1188.74 | 23.53625 | 2 R.KLKKKILK chr2@1388  | 9.36E-11 | 0.002961 |
| 19July2011 | 5007  | 727.4   | 25.54427 | 2 _HSDDVLI Splice@chr   | 3.15E-10 | 0.008943 |
| 1Mar2011-  | 145   | 454.24  | 9.224734 | 2 _EASFQGI chr3@7698    | 1.62E-10 | 0.004699 |
| 1Mar2011-  | 19423 | 987.52  | -17.7563 | 1 R.HFIASAVI chr4@1498  | 3.55E-10 | 0.008533 |
| 19July2011 | 10733 | 984.52  | -19.7742 | 2 _IWDITLLK chr1@1546   | 3.98E-10 | 0.007126 |
| 1Mar2011-  | 15990 | 818.89  | -9.74324 | 2 R.LCM+15.( chrX@1456  | 3.11E-10 | 0.009879 |
| 1Mar2011-  | 11559 | 774.91  | -21.0434 | 4 _NETGLNK chr3@7952    | 4.34E-10 | 0.009763 |
| 1Mar2011-  | 1389  | 666.35  | -23.424  | 1 R.YAAGGVI chr1@1396   | 1.55E-10 | 0.005742 |

|           |       |        |          |                         |          |          |
|-----------|-------|--------|----------|-------------------------|----------|----------|
| 1Mar2011- | 13832 | 864.43 | -12.1997 | 2 _ .REFFVQK chr4@1258  | 1.56E-10 | 0.004778 |
| 1Mar2011- | 13894 | 864.43 | -12.1997 | 2 _ .REFFVQK chr4@1258  | 3.55E-10 | 0.00945  |
| 1Mar2011- | 12463 | 864.43 | -12.1997 | 2 _ .REFFVQK chr4@1258  | 3.04E-10 | 0.00921  |
| 1Mar2011- | 12717 | 864.42 | -23.7994 | 2 _ .REFFVQK chr4@1258  | 3.25E-10 | 0.009617 |
| 1Mar2011- | 12264 | 864.43 | -12.1997 | 2 _ .REFFVQK chr4@1258  | 3.05E-10 | 0.008378 |
| 1Mar2011- | 14147 | 864.43 | -12.1997 | 2 _ .REFFVQK chr4@1258  | 6.47E-11 | 0.001646 |
| 1Mar2011- | 19528 | 530.02 | -19.8939 | 3 A.HVNIIIVVI chrX@2068 | 3.09E-10 | 0.006195 |
| 1Mar2011- | 17571 | 530.02 | -19.8939 | 3 A.HVNIIIVVI chrX@2068 | 1.04E-10 | 0.002912 |
| 1Mar2011- | 18331 | 530.02 | -19.8939 | 3 A.HVNIIIVVI chrX@2068 | 1.00E-10 | 0.002795 |
| 1Mar2011- | 16788 | 530.02 | -19.8939 | 3 A.HVNIIIVVI chrX@2068 | 1.82E-11 | 5.57E-04 |
| 1Mar2011- | 18169 | 530.02 | -19.8939 | 3 A.HVNIIIVVI chrX@2068 | 1.93E-10 | 0.004846 |
| 1Mar2011- | 17971 | 530.02 | -19.8939 | 3 A.HVNIIIVVI chrX@2068 | 1.44E-10 | 0.003969 |
| 1Mar2011- | 18275 | 530.02 | -19.8939 | 3 A.HVNIIIVVI chrX@2068 | 1.20E-10 | 0.003626 |
| 1Mar2011- | 18055 | 530.02 | -19.8939 | 3 A.HVNIIIVVI chrX@2068 | 2.40E-10 | 0.00588  |
| 1Mar2011- | 17926 | 530.02 | -19.8939 | 3 A.HVNIIIVVI chrX@2068 | 9.28E-11 | 0.002427 |
| 1Mar2011- | 18098 | 530.02 | -19.8939 | 3 A.HVNIIIVVI chrX@2068 | 4.55E-11 | 0.001055 |
| 1Mar2011- | 18372 | 530.02 | -19.8939 | 3 A.HVNIIIVVI chrX@2068 | 1.94E-10 | 0.004846 |
| 1Mar2011- | 18302 | 530.02 | -19.8939 | 3 A.HVNIIIVVI chrX@2068 | 7.58E-11 | 0.001805 |
| 1Mar2011- | 16631 | 530.02 | -19.8939 | 3 A.HVNIIIVVI chrX@2068 | 8.71E-11 | 0.002427 |
| 1Mar2011- | 18016 | 530.02 | -19.8939 | 3 A.HVNIIIVVI chrX@2068 | 4.03E-11 | 8.00E-04 |
| 1Mar2011- | 15374 | 530.02 | -19.8939 | 3 A.HVNIIIVVI chrX@2068 | 1.65E-10 | 0.005087 |
| 1Mar2011- | 15543 | 530.02 | -19.8939 | 3 A.HVNIIIVVI chrX@2068 | 1.20E-10 | 0.003584 |
| 1Mar2011- | 15527 | 530.02 | -19.8939 | 3 A.HVNIIIVVI chrX@2068 | 9.68E-11 | 0.002962 |
| 1Mar2011- | 13753 | 530.02 | -19.8939 | 3 A.HVNIIIVVI chrX@2068 | 2.20E-10 | 0.004377 |
| 1Mar2011- | 18617 | 530.02 | -19.8939 | 3 A.HVNIIIVVI chrX@2068 | 4.78E-11 | 0.001307 |
| 1Mar2011- | 20105 | 530.02 | -19.8939 | 3 A.HVNIIIVVI chrX@2068 | 1.64E-10 | 0.004009 |
| 1Mar2011- | 20032 | 530.02 | -19.8939 | 3 A.HVNIIIVVI chrX@2068 | 1.97E-11 | 5.48E-04 |
| 1Mar2011- | 18562 | 530.02 | -19.8939 | 3 A.HVNIIIVVI chrX@2068 | 1.99E-11 | 5.48E-04 |
| 1Mar2011- | 18374 | 530.02 | -19.8939 | 3 A.HVNIIIVVI chrX@2068 | 1.45E-10 | 0.003787 |
| 1Mar2011- | 18593 | 530.02 | -19.8939 | 3 A.HVNIIIVVI chrX@2068 | 5.36E-11 | 0.001812 |
| 1Mar2011- | 18767 | 530.02 | -19.8939 | 3 A.HVNIIIVVI chrX@2068 | 5.23E-11 | 0.001561 |
| 1Mar2011- | 15687 | 530.02 | -19.8939 | 3 A.HVNIIIVVI chrX@2068 | 3.04E-10 | 0.007379 |
| 1Mar2011- | 19085 | 530.02 | -19.8939 | 3 A.HVNIIIVVI chrX@2068 | 2.62E-11 | 8.05E-04 |
| 1Mar2011- | 18638 | 530.02 | -19.8939 | 3 A.HVNIIIVVI chrX@2068 | 1.50E-10 | 0.003787 |
| 1Mar2011- | 18526 | 530.02 | -19.8939 | 3 A.HVNIIIVVI chrX@2068 | 1.65E-10 | 0.004116 |
| 1Mar2011- | 19130 | 530.02 | -19.8939 | 3 A.HVNIIIVVI chrX@2068 | 3.62E-10 | 0.008699 |
| 1Mar2011- | 19110 | 530.02 | -19.8939 | 3 A.HVNIIIVVI chrX@2068 | 1.78E-10 | 0.004451 |
| 1Mar2011- | 13824 | 530.02 | -19.8939 | 3 A.HVNIIIVVI chrX@2068 | 3.84E-10 | 0.007773 |
| 1Mar2011- | 16002 | 530.02 | -19.8939 | 3 A.HVNIIIVVI chrX@2068 | 2.63E-11 | 4.48E-04 |
| 1Mar2011- | 16703 | 530.02 | -19.8939 | 3 A.HVNIIIVVI chrX@2068 | 1.56E-10 | 0.003489 |
| 1Mar2011- | 17696 | 530.02 | -19.8939 | 3 A.HVNIIIVVI chrX@2068 | 1.64E-10 | 0.003612 |
| 1Mar2011- | 16721 | 530.02 | -19.8939 | 3 A.HVNIIIVVI chrX@2068 | 1.66E-10 | 0.003612 |
| 1Mar2011- | 17594 | 530.02 | -19.8939 | 3 A.HVNIIIVVI chrX@2068 | 2.18E-10 | 0.005123 |
| 1Mar2011- | 17227 | 530.02 | -19.8939 | 3 A.HVNIIIVVI chrX@2068 | 1.30E-10 | 0.002856 |
| 1Mar2011- | 17248 | 530.02 | -19.8939 | 3 A.HVNIIIVVI chrX@2068 | 1.39E-10 | 0.003112 |
| 1Mar2011- | 15318 | 530.02 | -19.8939 | 3 A.HVNIIIVVI chrX@2068 | 3.09E-11 | 5.89E-04 |
| 1Mar2011- | 15782 | 530.02 | -19.8939 | 3 A.HVNIIIVVI chrX@2068 | 2.41E-11 | 3.00E-04 |

|            |       |         |          |                          |          |          |
|------------|-------|---------|----------|--------------------------|----------|----------|
| 1Mar2011-  | 15229 | 530.02  | -19.8939 | 3 A.HVNIIIVI chrX@2068   | 2.20E-11 | 3.00E-04 |
| 1Mar2011-  | 16603 | 530.02  | -19.8939 | 3 A.HVNIIIVI chrX@2068   | 8.97E-11 | 0.001812 |
| 1Mar2011-  | 17982 | 530.02  | -19.8939 | 3 A.HVNIIIVI chrX@2068   | 3.81E-11 | 7.33E-04 |
| 1Mar2011-  | 16739 | 530.02  | -19.8939 | 3 A.HVNIIIVI chrX@2068   | 4.80E-11 | 0.001007 |
| 1Mar2011-  | 15822 | 530.02  | -19.8939 | 3 A.HVNIIIVI chrX@2068   | 6.70E-11 | 0.001545 |
| 1Mar2011-  | 16541 | 530.02  | -19.8939 | 3 A.HVNIIIVI chrX@2068   | 4.26E-10 | 0.009122 |
| 1Mar2011-  | 17384 | 530.02  | -19.8939 | 3 A.HVNIIIVI chrX@2068   | 2.70E-10 | 0.006881 |
| 1Mar2011-  | 17678 | 530.02  | -19.8939 | 3 A.HVNIIIVI chrX@2068   | 1.49E-10 | 0.003367 |
| 1Mar2011-  | 16410 | 530.02  | -19.8939 | 3 A.HVNIIIVI chrX@2068   | 4.75E-11 | 0.001007 |
| 1Mar2011-  | 17212 | 530.02  | -19.8939 | 3 A.HVNIIIVI chrX@2068   | 6.65E-11 | 0.001545 |
| 1Mar2011-  | 15942 | 530.02  | -19.8939 | 3 A.HVNIIIVI chrX@2068   | 2.58E-11 | 4.48E-04 |
| 1Mar2011-  | 18007 | 530.02  | -19.8939 | 3 A.HVNIIIVI chrX@2068   | 8.02E-11 | 0.001545 |
| 1Mar2011-  | 17879 | 530.02  | -19.8939 | 3 A.HVNIIIVI chrX@2068   | 7.27E-11 | 0.001545 |
| 1Mar2011-  | 16039 | 530.02  | -19.8939 | 3 A.HVNIIIVI chrX@2068   | 4.91E-11 | 0.001007 |
| 1Mar2011-  | 16672 | 530.02  | -19.8939 | 3 A.HVNIIIVI chrX@2068   | 2.10E-11 | 3.00E-04 |
| 1Mar2011-  | 16477 | 530.02  | -19.8939 | 3 A.HVNIIIVI chrX@2068   | 6.79E-11 | 0.001545 |
| 1Mar2011-  | 15914 | 530.02  | -19.8939 | 3 A.HVNIIIVI chrX@2068   | 9.55E-12 | 1.56E-04 |
| 19July2011 | 457   | 483.75  | -1.64313 | 2 R.SSGATVT chr2@7305    | 1.69E-10 | 0.008262 |
| 1Mar2011-  | 19160 | 1180.95 | 17.10477 | 3 K.DHLDHQI Splice@chr   | 2.79E-10 | 0.006695 |
| 19July2011 | 7547  | 674.35  | 18.71381 | 3 K.M+15.99 Splice@chr   | 4.12E-11 | 5.90E-04 |
| 1Mar2011-  | 12036 | 884.93  | -14.2656 | 2 R.SRLYEITY chr1@9478   | 2.33E-10 | 0.00631  |
| 19July2011 | 3373  | 659.86  | -22.5107 | 2 R.TK+14.01 chr2@7225   | 1.79E-10 | 0.005214 |
| 19July2011 | 1248  | 659.86  | -22.5107 | 2 R.TK+14.01 Splice@chr  | 2.19E-10 | 0.005078 |
| 19July2011 | 1064  | 659.86  | -22.5107 | 2 R.TK+14.01 Splice@chr  | 1.24E-10 | 0.005909 |
| 1Mar2011-  | 12710 | 787.94  | 17.42519 | 2 R.M+15.99 Splice@chr   | 2.35E-10 | 0.00559  |
| 1Mar2011-  | 8730  | 713.4   | -26.4476 | 2 R.AKLIIFEK' Splice@chr | 6.35E-12 | 2.70E-04 |
| 1Mar2011-  | 13913 | 565.32  | -16.4844 | 3 L.TVFNITID chr1@1330   | 4.30E-10 | 0.009122 |
| 1Mar2011-  | 6139  | 560.62  | -25.5714 | 3 K.NVTWTIV chr4@1024    | 3.33E-10 | 0.008595 |
| 1Mar2011-  | 15780 | 1190.75 | 17.23749 | 1 K.MQKSIKS chr4@1520    | 2.76E-10 | 0.009816 |
| 19July2011 | 1080  | 417.25  | 13.0689  | 2 R.EASTALLI chr3@1092   | 1.79E-10 | 0.004098 |
| 1Mar2011-  | 9873  | 1053.84 | -23.2657 | 3 R.QVIIMNF Splice@chr   | 1.62E-10 | 0.003056 |
| 1Mar2011-  | 10694 | 1054.17 | -27.4196 | 3 R.QVIIMNF Splice@chr   | 6.50E-11 | 0.001026 |
| 1Mar2011-  | 9062  | 1054.17 | -27.4196 | 3 R.QVIIMNF Splice@chr   | 1.78E-10 | 0.006219 |
| 1Mar2011-  | 9499  | 1053.84 | -23.2657 | 3 R.QVIIMNF Splice@chr   | 1.03E-10 | 0.003739 |
| 1Mar2011-  | 8866  | 1054.17 | -27.4196 | 3 R.QVIIMNF Splice@chr   | 1.89E-10 | 0.004336 |
| 1Mar2011-  | 9966  | 1053.84 | -23.2657 | 3 R.QVIIMNF Splice@chr   | 3.45E-11 | 0.001053 |
| 1Mar2011-  | 9911  | 1053.84 | -23.2657 | 3 R.QVIIMNF Splice@chr   | 6.73E-11 | 0.002181 |
| 1Mar2011-  | 10140 | 1054.17 | -27.4196 | 3 R.QVIIMNF Splice@chr   | 3.10E-10 | 0.00867  |
| 1Mar2011-  | 10687 | 1053.84 | -23.2657 | 3 R.QVIIMNF Splice@chr   | 3.96E-10 | 0.009052 |
| 1Mar2011-  | 7910  | 1054.17 | -27.4196 | 3 R.QVIIMNF Splice@chr   | 1.62E-10 | 0.003543 |
| 1Mar2011-  | 8280  | 494.78  | -9.33246 | 2 R.KKIGCPTI chrX@2482   | 4.12E-10 | 0.008404 |
| 1Mar2011-  | 4341  | 886.49  | 2.412511 | 2 R.VEGERW chr5@1004     | 3.02E-10 | 0.005789 |
| 1Mar2011-  | 16681 | 916.48  | 7.172253 | 2 R.SAGQRIC chrX@6937    | 7.83E-11 | 0.003402 |
| 19July2011 | 7551  | 518.3   | 8.023365 | 2 K.TTAFIVLD chr5@1522   | 3.21E-10 | 0.009235 |
| 1Mar2011-  | 3582  | 745.41  | -14.5944 | 1 R.GVGGAEl chr3@4708    | 1.32E-11 | 7.23E-04 |
| 1Mar2011-  | 645   | 548.29  | 14.38682 | 4 R.RSM+15. chr2@1076    | 2.34E-10 | 0.006223 |
| 1Mar2011-  | 16217 | 868.5   | -26.2217 | 2 R.SRFTRILL' Splice@chr | 8.28E-11 | 0.002149 |

|            |       |         |          |                          |          |          |
|------------|-------|---------|----------|--------------------------|----------|----------|
| 19July2011 | 9282  | 951.83  | -3.16679 | 3 R.FLVKRM+ chr3@6516    | 1.92E-10 | 0.008865 |
| 1Mar2011-  | 9149  | 894.98  | 10.89716 | 2 K.KIEEVAEC Splice@chr  | 2.06E-10 | 0.007737 |
| 1Mar2011-  | 13509 | 827.46  | -17.4011 | 2 K.FENSLQF chr5@7510    | 1.05E-11 | 4.39E-04 |
| 1Mar2011-  | 14242 | 803.46  | 27.07838 | 2 K.IEWFI AKI chr4@1258  | 2.85E-10 | 0.009953 |
| 19July2011 | 407   | 401.23  | 7.625217 | 3 R.GQLTGG+ chr2@1647    | 2.80E-11 | 7.78E-04 |
| 19July2011 | 412   | 401.23  | 7.625217 | 3 R.GQLTGG+ chr2@1647    | 2.93E-10 | 0.008045 |
| 19July2011 | 5255  | 565.31  | 11.85615 | 2 H.FVHAF AF chr1@1061   | 8.56E-11 | 0.001768 |
| 19July2011 | 14065 | 824.44  | -2.07544 | 2 K.NIFCFK+1 chr1@1386   | 5.99E-11 | 0.002992 |
| 19July2011 | 1531  | 599.34  | 28.4359  | 2 R.KCYEKLVI chr2@1362   | 3.35E-10 | 0.006578 |
| 19July2011 | 1587  | 461.74  | -10.7303 | 2 K.FGCLLQG chr5@8849    | 2.79E-10 | 0.007669 |
| 19July2011 | 3782  | 665.68  | 11.63161 | 3 K.RSTETFQ chr5@4249    | 5.30E-10 | 0.009908 |
| 19July2011 | 27    | 510.27  | -12.8308 | 3 K.YQGCAA+ chrX@1996    | 1.40E-10 | 0.003743 |
| 1Mar2011-  | 8056  | 490.26  | -12.974  | 3 _ .LKQNYGM chrX@1573   | 1.68E-12 | 1.69E-04 |
| 1Mar2011-  | 9177  | 762.07  | -10.8838 | 3 L.FENLM+1 chr2@3448    | 3.43E-10 | 0.009552 |
| 1Mar2011-  | 3810  | 422.75  | 3.545689 | 2 R.LATVTPSI chr5@2075   | 5.95E-11 | 0.002072 |
| 19July2011 | 9914  | 811.92  | 1.394633 | 2 R.KEEDKYL chr3@5293    | 8.25E-11 | 0.002819 |
| 1Mar2011-  | 9902  | 639.04  | 25.55681 | 3 P.ITVLADG+ chrX@3303   | 1.27E-10 | 0.004399 |
| 1Mar2011-  | 19416 | 746.41  | 23.36426 | 3 K.IEFK+14.( chr5@5863  | 8.38E-11 | 0.00177  |
| 1Mar2011-  | 5989  | 482.78  | -2.78782 | 2 R.KFLVEAEI chrX@3858   | 3.91E-10 | 0.009611 |
| 1Mar2011-  | 6184  | 482.78  | -2.78782 | 2 R.KFLVEAEI chrX@3858   | 3.61E-10 | 0.008898 |
| 1Mar2011-  | 18356 | 1154.71 | -1.90453 | 1 R.NDIIRRV chrX@7495    | 3.51E-11 | 0.00146  |
| 1Mar2011-  | 9133  | 721.37  | 15.81461 | 2 _ .FFM+15.( Splice@chr | 2.78E-10 | 0.007625 |
| 19July2011 | 3196  | 886.1   | -27.4775 | 3 _ .QFRFSSEI chr2@1148  | 2.23E-10 | 0.00838  |
| 19July2011 | 979   | 403.23  | 9.569755 | 3 K.TGIRFGSI chr4@1073   | 3.06E-10 | 0.00885  |
| 1Mar2011-  | 1500  | 537.27  | 4.063318 | 3 _ .YIMEELH+ chr2@5793  | 2.32E-10 | 0.00615  |
| 1Mar2011-  | 4958  | 815.41  | -16.9372 | 2 _ .RHFNIFF+ chrX@9062  | 2.78E-10 | 0.008721 |
| 1Mar2011-  | 15076 | 801.47  | -6.14059 | 2 R.VSKEIAE\ Splice@chr  | 3.50E-10 | 0.00945  |
| 1Mar2011-  | 15012 | 770.17  | -3.49151 | 4 R.INFPYLVS chr4@1967   | 2.30E-10 | 0.005682 |
| 19July2011 | 7255  | 613.34  | 27.95988 | 3 R.LFFEFGG chr2@1266    | 5.70E-11 | 0.003599 |
| 19July2011 | 1753  | 628.84  | -11.2769 | 2 _ .HPRPIAPI Splice@chr | 1.77E-10 | 0.004421 |
| 19July2011 | 7087  | 734.44  | 12.7326  | 2 K.VVNLLAP chr1@9173    | 9.71E-12 | 3.08E-04 |
| 19July2011 | 6957  | 734.44  | 12.7326  | 2 K.VVNLLAP chr1@9173    | 2.47E-12 | 0        |
| 19July2011 | 4145  | 543.26  | -9.09224 | 4 K.KM+15.9 chr1@2706    | 5.13E-10 | 0.008887 |
| 1Mar2011-  | 3652  | 424.22  | -22.0164 | 2 K.HTLSFGG chr2@8224    | 4.20E-11 | 6.91E-04 |
| 1Mar2011-  | 1403  | 556.32  | -2.03326 | 2 K.ENIHFIPI chrX@6079   | 4.17E-10 | 0.008851 |
| 1Mar2011-  | 14887 | 886.5   | -21.3672 | 2 K.KIGDRDN chr5@1698    | 3.58E-12 | 1.62E-04 |
| 19July2011 | 8930  | 616.02  | 3.969703 | 3 R.RKTQTGE chr1@7780    | 1.46E-11 | 9.37E-04 |
| 1Mar2011-  | 12082 | 459.77  | 24.44308 | 2 _ .MMLAPK chrX@1115    | 1.43E-10 | 0.003067 |
| 1Mar2011-  | 16045 | 1170.64 | -13.0242 | 2 R.NQCWKL chr5@1856     | 1.73E-10 | 0.005068 |
| 1Mar2011-  | 15912 | 826.92  | -22.0957 | 4 R.FLKKKLFS chrX@2758   | 2.16E-11 | 9.15E-04 |
| 1Mar2011-  | 18871 | 1094.12 | 5.279947 | 2 K.FRSK+14. chr2@1428   | 1.93E-10 | 0.004685 |
| 19July2011 | 11653 | 663.38  | -24.8596 | 3 K.LIEKK+14 chr1@2879   | 3.25E-10 | 0.005817 |
| 1Mar2011-  | 6680  | 522.3   | -7.72751 | 2 R.VVYVTIH+ chr5@1760   | 7.41E-11 | 0.002128 |
| 1Mar2011-  | 14715 | 739.38  | 19.23375 | 2 K.MLIHRVC chr2@9949    | 6.01E-11 | 0.002204 |
| 1Mar2011-  | 17389 | 741.38  | -15.9769 | 4 R.TPLPPPSI chr2@5698   | 9.35E-11 | 0.003855 |
| 19July2011 | 1025  | 634.78  | -16.1789 | 2 M.TEM+15 chr5@1158     | 2.20E-10 | 0.005873 |
| 1Mar2011-  | 10237 | 849.45  | -25.5152 | 2 K.VKKQYSK chr5@2631    | 1.97E-10 | 0.004796 |

|            |       |         |          |                         |          |          |
|------------|-------|---------|----------|-------------------------|----------|----------|
| 1Mar2011-  | 6376  | 623.83  | 8.064487 | 4 K.IVRNSVN chr5@4637   | 1.71E-10 | 0.005967 |
| 1Mar2011-  | 12058 | 999.99  | 27.41775 | 2 R.QAFNDD' chrX@5872   | 1.91E-10 | 0.0043   |
| 19July2011 | 8044  | 873.09  | 10.91822 | 3 K.YPFKNNC chrX@1338   | 6.34E-11 | 0.001778 |
| 1Mar2011-  | 4372  | 768.89  | 4.13324  | 2 K.QAFSTVG chr2@1865   | 2.02E-19 | 0        |
| 1Mar2011-  | 4482  | 768.89  | 4.13324  | 2 K.QAFSTVG chr2@1865   | 1.37E-21 | 0        |
| 1Mar2011-  | 4429  | 768.89  | 4.13324  | 2 K.QAFSTVG chr2@1865   | 1.37E-21 | 0        |
| 1Mar2011-  | 5367  | 768.89  | 4.13324  | 2 K.QAFSTVG chr2@1865   | 1.37E-21 | 0        |
| 1Mar2011-  | 5426  | 768.89  | 4.13324  | 2 K.QAFSTVG Splice@chr  | 7.70E-17 | 0        |
| 1Mar2011-  | 4015  | 768.89  | 4.13324  | 2 K.QAFSTVG chr2@1865   | 4.30E-18 | 0        |
| 1Mar2011-  | 3966  | 768.89  | 4.13324  | 2 K.QAFSTVG chr2@1865   | 6.37E-21 | 0        |
| 1Mar2011-  | 4877  | 768.89  | 4.13324  | 2 K.QAFSTVG chr2@1865   | 2.74E-21 | 0        |
| 1Mar2011-  | 4929  | 768.89  | 4.13324  | 2 K.QAFSTVG chr2@1865   | 1.13E-19 | 0        |
| 19July2011 | 8639  | 836.11  | -3.89796 | 3 R.EMVFFFS Splice@chr  | 1.35E-10 | 0.003441 |
| 1Mar2011-  | 14164 | 806.41  | 7.849742 | 2 K.K+14.016 chr1@2995  | 2.59E-10 | 0.007595 |
| 1Mar2011-  | 14841 | 806.41  | 7.849742 | 2 K.K+14.016 chr1@2995  | 8.38E-11 | 0.001513 |
| 1Mar2011-  | 13197 | 806.41  | 7.849742 | 2 K.K+14.016 chr1@2995  | 1.24E-10 | 0.003711 |
| 19July2011 | 3388  | 554.3   | -25.3713 | 2 _LTIITFFH Splice@chr  | 3.10E-10 | 0.006027 |
| 19July2011 | 6978  | 645.99  | -16.5286 | 3 R.TSGRQD1 chr1@1252   | 2.38E-10 | 0.005885 |
| 1Mar2011-  | 6657  | 606.3   | -17.646  | 2 R.MLNFLSC chr2@1612   | 4.01E-10 | 0.00982  |
| 1Mar2011-  | 6276  | 606.3   | -17.646  | 2 R.MLNFLSC chr2@1612   | 1.25E-10 | 0.002834 |
| 1Mar2011-  | 6332  | 606.3   | -17.646  | 2 R.MLNFLSC chr2@1612   | 3.23E-10 | 0.00867  |
| 1Mar2011-  | 3822  | 628.87  | -1.60355 | 2 K.KKTK+14. chr2@4465  | 2.00E-10 | 0.005303 |
| 1Mar2011-  | 1122  | 512.93  | 8.47215  | 3 R.EKTTAPG chr4@1158   | 3.95E-10 | 0.00982  |
| 1Mar2011-  | 993   | 452.26  | -4.66636 | 2 R.VLHNAPF chr2@1406   | 2.58E-10 | 0.00491  |
| 1Mar2011-  | 13731 | 953.52  | -3.04418 | 2 R.RKGTEYA chr3@1084   | 7.99E-11 | 0.001187 |
| 19July2011 | 8485  | 515.62  | -24.565  | 3 _IKLIKYYHI chr5@1025  | 2.60E-10 | 0.008293 |
| 1Mar2011-  | 17169 | 689.72  | 27.1782  | 3 K.MDFSPK/ chr2@8680   | 2.56E-10 | 0.006118 |
| 1Mar2011-  | 11859 | 647.34  | -21.2146 | 2 K.NNIK+14. chrX@7865  | 1.44E-10 | 0.005497 |
| 1Mar2011-  | 13217 | 647.34  | -21.2146 | 2 K.NNIK+14. chrX@7865  | 2.32E-10 | 0.006781 |
| 1Mar2011-  | 10626 | 647.34  | -21.2146 | 2 K.NNIK+14. chrX@7865  | 1.61E-10 | 0.006137 |
| 1Mar2011-  | 18899 | 675.38  | 22.98921 | 2 _DM+15.9 chr2@1345    | 4.57E-10 | 0.009842 |
| 1Mar2011-  | 13625 | 1181.63 | 24.81539 | 2 _LLKLKFDc chrX@1580   | 3.04E-10 | 0.007679 |
| 1Mar2011-  | 18090 | 1131.55 | -9.586   | 2 _NYRFCCG Splice@chr   | 1.83E-10 | 0.005086 |
| 1Mar2011-  | 19002 | 804.43  | -23.3979 | 3 K.IIYCINNQ chr5@1797  | 2.01E-10 | 0.005318 |
| 1Mar2011-  | 17350 | 804.44  | -10.9393 | 3 K.IIYCINNQ chr5@1797  | 1.07E-11 | 4.62E-04 |
| 1Mar2011-  | 15204 | 804.44  | -10.9393 | 3 K.IIYCINNQ chr5@1797  | 9.75E-11 | 0.002962 |
| 1Mar2011-  | 12256 | 894.49  | -3.31376 | 2 R.RTANSAN chr1@2342   | 1.89E-10 | 0.005619 |
| 1Mar2011-  | 13709 | 894.49  | -3.31376 | 2 R.RTANSAN chr1@2342   | 1.90E-10 | 0.003031 |
| 1Mar2011-  | 4096  | 573.35  | 23.00371 | 2 R.TIVLGGCi Splice@chr | 2.83E-10 | 0.005994 |
| 19July2011 | 10795 | 555.97  | -8.8717  | 3 R.PHHSPVF chr5@1909   | 3.10E-11 | 0.001174 |
| 1Mar2011-  | 18095 | 594.8   | 6.916417 | 4 K.M+15.99 chr5@1931   | 2.49E-10 | 0.006354 |
| 1Mar2011-  | 17996 | 1034.63 | 3.371197 | 1 K.AKIWKIV Splice@chr  | 3.70E-10 | 0.007793 |
| 1Mar2011-  | 4035  | 514.27  | -13.913  | 2 R.DVVVSSF chr4@8067   | 1.55E-10 | 0.00374  |
| 1Mar2011-  | 3018  | 514.29  | 24.97204 | 2 R.DVVVSSF chr4@8067   | 4.05E-10 | 0.008892 |
| 1Mar2011-  | 3595  | 514.27  | -13.913  | 2 R.DVVVSSF chr4@8067   | 1.66E-10 | 0.004116 |
| 1Mar2011-  | 2876  | 514.27  | -13.913  | 2 R.DVVVSSF chr4@8067   | 3.47E-10 | 0.00742  |
| 1Mar2011-  | 13900 | 826.45  | 4.551543 | 2 _KVDGEDt Splice@chr   | 8.82E-11 | 0.002194 |

|            |       |        |          |                        |          |          |
|------------|-------|--------|----------|------------------------|----------|----------|
| 1Mar2011-  | 13959 | 826.45 | 4.551543 | 2 _KVDGED† Splice@chr  | 1.24E-10 | 0.003174 |
| 1Mar2011-  | 15509 | 826.45 | 4.551543 | 2 _KVDGED† Splice@chr  | 2.76E-10 | 0.006904 |
| 1Mar2011-  | 15452 | 826.45 | 4.551543 | 2 _KVDGED† Splice@chr  | 1.51E-10 | 0.004129 |
| 1Mar2011-  | 10891 | 826.45 | 4.551543 | 2 _KVDGED† Splice@chr  | 6.37E-11 | 0.002203 |
| 1Mar2011-  | 12787 | 826.45 | 4.551543 | 2 _KVDGED† Splice@chr  | 2.02E-10 | 0.005303 |
| 1Mar2011-  | 12836 | 826.45 | 4.551543 | 2 _KVDGED† Splice@chr  | 2.95E-10 | 0.006964 |
| 1Mar2011-  | 13453 | 826.45 | 4.551543 | 2 _KVDGED† Splice@chr  | 2.49E-10 | 0.008257 |
| 1Mar2011-  | 12841 | 826.45 | 4.551543 | 2 _KVDGED† Splice@chr  | 3.85E-10 | 0.00958  |
| 1Mar2011-  | 12776 | 826.45 | 4.551543 | 2 _KVDGED† Splice@chr  | 1.32E-10 | 0.003215 |
| 1Mar2011-  | 11988 | 825.94 | -5.54908 | 2 _KVDGED† Splice@chr  | 1.54E-10 | 0.003331 |
| 1Mar2011-  | 12733 | 826.45 | 4.551543 | 2 _KVDGED† Splice@chr  | 1.15E-10 | 0.00411  |
| 1Mar2011-  | 12675 | 826.45 | 4.551543 | 2 _KVDGED† Splice@chr  | 8.95E-12 | 0        |
| 1Mar2011-  | 11932 | 826.45 | 4.551543 | 2 _KVDGED† Splice@chr  | 8.61E-11 | 0.002825 |
| 1Mar2011-  | 14240 | 826.45 | 4.551543 | 2 _KVDGED† Splice@chr  | 1.67E-11 | 2.80E-04 |
| 1Mar2011-  | 14685 | 826.45 | 4.551543 | 2 _KVDGED† Splice@chr  | 4.62E-11 | 0.002045 |
| 1Mar2011-  | 11399 | 826.45 | 4.551543 | 2 _KVDGED† Splice@chr  | 2.78E-10 | 0.009758 |
| 1Mar2011-  | 12914 | 826.45 | 4.551543 | 2 _KVDGED† Splice@chr  | 6.23E-12 | 3.72E-04 |
| 1Mar2011-  | 14668 | 826.45 | 4.551543 | 2 _KVDGED† Splice@chr  | 4.71E-11 | 0.0017   |
| 1Mar2011-  | 14719 | 826.45 | 4.551543 | 2 _KVDGED† Splice@chr  | 7.51E-11 | 0.002279 |
| 1Mar2011-  | 15001 | 826.45 | 4.551543 | 2 _KVDGED† Splice@chr  | 8.84E-11 | 0.001985 |
| 1Mar2011-  | 13280 | 826.45 | 4.551543 | 2 _KVDGED† Splice@chr  | 1.04E-10 | 0.003323 |
| 1Mar2011-  | 13389 | 826.45 | 4.551543 | 2 _KVDGED† Splice@chr  | 1.42E-11 | 5.29E-04 |
| 1Mar2011-  | 12006 | 826.45 | 4.551543 | 2 _KVDGED† Splice@chr  | 9.85E-11 | 0.001904 |
| 1Mar2011-  | 12611 | 826.45 | 4.551543 | 2 _KVDGED† Splice@chr  | 4.53E-11 | 0.001357 |
| 19July2011 | 12722 | 735.39 | -7.62094 | 3 P.AFSKIWA Splice@chr | 7.22E-11 | 0.001926 |
| 19July2011 | 4083  | 630.98 | -27.0626 | 3 K.NKEIFEEN chr2@3189 | 1.09E-10 | 0.004874 |
| 1Mar2011-  | 10305 | 553.3  | -14.8753 | 2 _EAALGGP chrX@2515   | 4.64E-11 | 0.001391 |
| 1Mar2011-  | 4615  | 875.99 | 29.22857 | 2 S.QSIQFPIS chr1@1061 | 8.88E-11 | 0.001691 |
| 1Mar2011-  | 4666  | 875.99 | 29.22857 | 2 S.QSIQFPIS chr1@1061 | 2.04E-10 | 0.00372  |
| 1Mar2011-  | 4117  | 875.99 | 29.22857 | 2 S.QSIQFPIS chr1@1061 | 1.05E-10 | 0.002821 |
| 1Mar2011-  | 4067  | 875.99 | 29.22857 | 2 S.QSIQFPIS chr1@1061 | 1.55E-10 | 0.004816 |
| 1Mar2011-  | 5853  | 875.99 | 29.22857 | 2 S.QSIQFPIS chr1@1061 | 5.75E-11 | 0.001026 |
| 1Mar2011-  | 4287  | 875.99 | 29.22857 | 2 S.QSIQFPIS chr1@1061 | 9.83E-11 | 0.002795 |
| 1Mar2011-  | 4345  | 875.99 | 29.22857 | 2 S.QSIQFPIS chr1@1061 | 1.21E-10 | 0.003626 |
| 1Mar2011-  | 4237  | 875.99 | 29.22857 | 2 S.QSIQFPIS chr1@1061 | 1.01E-10 | 0.002795 |
| 1Mar2011-  | 3415  | 875.99 | 29.22857 | 2 S.QSIQFPIS chr1@1061 | 1.33E-10 | 0.003852 |
| 1Mar2011-  | 3368  | 875.99 | 29.22857 | 2 S.QSIQFPIS chr1@1061 | 9.07E-11 | 0.00322  |
| 1Mar2011-  | 3518  | 875.99 | 29.22857 | 2 S.QSIQFPIS chr1@1061 | 5.92E-11 | 0.002022 |
| 1Mar2011-  | 3467  | 875.99 | 29.22857 | 2 S.QSIQFPIS chr1@1061 | 8.99E-11 | 0.00322  |
| 1Mar2011-  | 5419  | 876.49 | 27.31145 | 2 S.QSIQFPIS chr1@1061 | 4.98E-11 | 9.98E-04 |
| 1Mar2011-  | 5472  | 876.49 | 27.31145 | 2 S.QSIQFPIS chr1@1061 | 6.41E-11 | 0.001256 |
| 1Mar2011-  | 4205  | 875.99 | 29.22857 | 2 S.QSIQFPIS chr1@1061 | 4.92E-11 | 0.001007 |
| 1Mar2011-  | 4259  | 875.99 | 29.22857 | 2 S.QSIQFPIS chr1@1061 | 1.03E-10 | 0.002351 |
| 1Mar2011-  | 5240  | 875.99 | 29.22857 | 2 S.QSIQFPIS chr1@1061 | 5.53E-10 | 0.009633 |
| 1Mar2011-  | 3278  | 875.99 | 29.22857 | 2 S.QSIQFPIS chr1@1061 | 6.45E-11 | 9.00E-04 |
| 1Mar2011-  | 3614  | 875.99 | 29.22857 | 2 S.QSIQFPIS chr1@1061 | 2.03E-10 | 0.005218 |
| 1Mar2011-  | 3709  | 875.99 | 29.22857 | 2 S.QSIQFPIS chr1@1061 | 4.83E-11 | 0.001166 |

|            |       |         |          |                         |          |          |
|------------|-------|---------|----------|-------------------------|----------|----------|
| 1Mar2011-  | 3661  | 875.99  | 29.22857 | 2 S.QSIQFPIS chr1@1061  | 6.04E-11 | 0.001488 |
| 19July2011 | 6439  | 752.37  | -29.649  | 2 R.AEEIEEK+ chr2@1375  | 2.13E-10 | 0.009071 |
| 1Mar2011-  | 5571  | 558.29  | -15.0852 | 3 _GCGFFLK+ chr5@2028   | 1.30E-13 | 0        |
| 1Mar2011-  | 18585 | 850.82  | 10.37133 | 3 R.VMYKKAI chr5@1646   | 2.18E-10 | 0.005057 |
| 1Mar2011-  | 7387  | 676.32  | -22.2029 | 2 K.REM+15. chrX@1536   | 6.51E-11 | 0.002026 |
| 1Mar2011-  | 8027  | 676.32  | -22.2029 | 2 K.REM+15. chrX@1536   | 4.40E-11 | 5.76E-04 |
| 1Mar2011-  | 16337 | 930.56  | 8.338993 | 2 K.CK+14.01 chr5@1990  | 4.14E-10 | 0.008173 |
| 19July2011 | 2481  | 448.9   | -14.0812 | 3 R.RYCRCFLI chrX@3918  | 3.77E-10 | 0.007068 |
| 1Mar2011-  | 11180 | 597.84  | -17.0587 | 4 K.LIQVFTNI chr3@7214  | 3.15E-10 | 0.008406 |
| 1Mar2011-  | 17349 | 816.45  | 30.00044 | 5 R.IICNISSRI chrX@1264 | 1.93E-10 | 0.005534 |
| 1Mar2011-  | 1536  | 573.78  | 10.72076 | 2 _ITIDDDYDY Splice@chr | 6.70E-11 | 0.002344 |
| 1Mar2011-  | 15906 | 895.92  | 1.673098 | 2 K.HEEYKAN chr2@8471   | 1.32E-11 | 0        |
| 1Mar2011-  | 9067  | 644.61  | 20.19998 | 4 R.QSRCGSF Splice@chr  | 3.73E-11 | 6.52E-04 |
| 1Mar2011-  | 17470 | 1100.61 | 25.35194 | 2 K.NCQIRQK chr2@3542   | 3.05E-10 | 0.007723 |
| 1Mar2011-  | 18577 | 1190.55 | -29.7448 | 2 K.CGK+14.( chr1@1885  | 3.42E-10 | 0.00771  |
| 1Mar2011-  | 13593 | 631.37  | -24.5931 | 4 R.NSKKKTK chr4@3588   | 1.34E-10 | 0.005049 |
| 1Mar2011-  | 12029 | 631.37  | -24.5931 | 4 R.NSKKKTK chr4@3588   | 4.76E-11 | 0.001321 |
| 19July2011 | 10839 | 555.97  | -23.2181 | 3 _VVLEGGC chr1@1210    | 2.71E-10 | 0.007132 |
| 19July2011 | 8507  | 596.34  | -0.71686 | 3 _AECRWSI chr3@1147    | 1.58E-10 | 0.0028   |
| 19July2011 | 4027  | 573.31  | -26.9813 | 2 K.LKKWEN+ chr3@4844   | 5.74E-11 | 0.002271 |
| 1Mar2011-  | 6424  | 687.01  | 3.591354 | 3 R.KAEEKAC chrX@1554   | 2.21E-10 | 0.004621 |
| 1Mar2011-  | 5183  | 687.01  | 3.591354 | 3 R.KAEEKAC chrX@1554   | 1.82E-10 | 0.00362  |
| 1Mar2011-  | 5811  | 687.01  | 3.591354 | 3 R.KAEEKAC chrX@1554   | 3.16E-10 | 0.008296 |
| 19July2011 | 5585  | 663.35  | -29.5541 | 2 R.FRREVLV+ chr2@1396  | 4.20E-11 | 0.001505 |
| 1Mar2011-  | 13410 | 778.9   | -26.6764 | 2 R.EWNVVN chr1@1438    | 5.49E-11 | 0.001804 |
| 1Mar2011-  | 512   | 549     | 4.124886 | 3 R.KIAK+14. Splice@chr | 2.57E-10 | 0.00491  |
| 1Mar2011-  | 2336  | 600.41  | -19.8197 | 2 R.KIVLMLIK chrX@9608  | 3.84E-10 | 0.008771 |
| 19July2011 | 11687 | 914.12  | -21.6567 | 3 R.SQELGEF chr5@1276   | 2.18E-10 | 0.006568 |
| 19July2011 | 149   | 668.38  | 4.166002 | 2 K.KKFSLENI chr5@6144  | 2.71E-10 | 0.005694 |
| 1Mar2011-  | 9430  | 888.95  | 13.58478 | 2 S.M+15.99: Splice@chr | 3.89E-10 | 0.009207 |
| 1Mar2011-  | 6690  | 579.05  | 25.46368 | 3 K.HK+14.01 chr3@8307  | 8.43E-11 | 0.001886 |
| 1Mar2011-  | 19937 | 1132.25 | 0.738224 | 3 K.ILKFLM+1 chrX@3755  | 1.54E-11 | 6.39E-04 |
| 1Mar2011-  | 9587  | 578.32  | -5.70901 | 2 R.LVGHAG+ chrX@1176   | 3.02E-10 | 0.007025 |
| 1Mar2011-  | 6244  | 547.32  | 5.921308 | 2 R.LLNYATSI chr3@5227  | 2.87E-12 | 1.54E-04 |
| 1Mar2011-  | 6322  | 547.32  | 5.921308 | 2 R.LLNYATSI chr3@5227  | 1.06E-12 | 0        |
| 1Mar2011-  | 7059  | 547.32  | 5.921308 | 2 R.LLNYATSI chr3@5227  | 1.75E-12 | 0        |
| 1Mar2011-  | 6419  | 547.32  | 5.921308 | 2 R.LLNYATSI chr3@5227  | 1.88E-12 | 1.69E-04 |
| 1Mar2011-  | 5143  | 547.32  | 5.921308 | 2 R.LLNYATSI chr3@5227  | 6.72E-13 | 0        |
| 1Mar2011-  | 5179  | 547.32  | 5.921308 | 2 R.LLNYATSI chr3@5227  | 6.72E-13 | 0        |
| 1Mar2011-  | 5866  | 547.32  | 5.921308 | 2 R.LLNYATSI chr3@5227  | 1.06E-12 | 0        |
| 1Mar2011-  | 5815  | 547.32  | 5.921308 | 2 R.LLNYATSI chr3@5227  | 1.06E-12 | 0        |
| 1Mar2011-  | 5750  | 547.32  | 5.921308 | 2 R.LLNYATSI chr3@5227  | 1.06E-12 | 0        |
| 1Mar2011-  | 5421  | 547.32  | 5.921308 | 2 R.LLNYATSI chr3@5227  | 1.23E-12 | 0        |
| 1Mar2011-  | 5365  | 547.32  | 5.921308 | 2 R.LLNYATSI chr3@5227  | 6.72E-13 | 0        |
| 1Mar2011-  | 5410  | 547.32  | 5.921308 | 2 R.LLNYATSI chr3@5227  | 6.72E-13 | 0        |
| 1Mar2011-  | 5367  | 547.82  | 2.850895 | 2 R.LLNYATSI chr3@5227  | 6.72E-13 | 0        |
| 1Mar2011-  | 6897  | 547.32  | 5.921308 | 2 R.LLNYATSI chr3@5227  | 6.72E-13 | 0        |

|            |       |         |          |                         |          |          |
|------------|-------|---------|----------|-------------------------|----------|----------|
| 1Mar2011-  | 6683  | 547.32  | 5.921308 | 2 R.LLNYATSI chr3@5227  | 6.72E-13 | 0        |
| 1Mar2011-  | 5714  | 547.32  | 5.921308 | 2 R.LLNYATSI chr3@5227  | 1.06E-12 | 0        |
| 1Mar2011-  | 6526  | 547.32  | 5.921308 | 2 R.LLNYATSI chr3@5227  | 6.72E-13 | 0        |
| 1Mar2011-  | 5654  | 547.32  | 5.921308 | 2 R.LLNYATSI chr3@5227  | 3.72E-12 | 0        |
| 1Mar2011-  | 5337  | 547.32  | 5.921308 | 2 R.LLNYATSI chr3@5227  | 5.33E-12 | 0        |
| 1Mar2011-  | 5660  | 547.32  | 5.921308 | 2 R.LLNYATSI chr3@5227  | 7.27E-13 | 0        |
| 1Mar2011-  | 4753  | 547.32  | 5.921308 | 2 R.LLNYATSI chr3@5227  | 6.72E-13 | 0        |
| 1Mar2011-  | 4252  | 547.32  | 5.921308 | 2 R.LLNYATSI chr3@5227  | 2.84E-11 | 0.001278 |
| 1Mar2011-  | 15183 | 1157.93 | 15.70925 | 3 _SITPSPLK chr5@1176   | 4.09E-10 | 0.008592 |
| 19July2011 | 4611  | 518.3   | 8.023365 | 2 K.TTTITFVP chr4@2027  | 3.81E-10 | 0.006633 |
| 19July2011 | 8299  | 834.13  | 8.88905  | 3 K.EGTK+14 chr1@9406   | 3.36E-10 | 0.009051 |
| 1Mar2011-  | 11752 | 531.8   | -24.4556 | 2 K.IVLWFIDf chr2@8884  | 4.31E-10 | 0.009812 |
| 1Mar2011-  | 13183 | 937.25  | -28.8791 | 4 K.LHSFFPKI chr2@1415  | 2.41E-10 | 0.008563 |
| 1Mar2011-  | 1707  | 629.31  | -29.0449 | 2 K.LRNADSN chrX@9476   | 2.22E-10 | 0.006781 |
| 1Mar2011-  | 10552 | 585.03  | -8.85988 | 4 K.NRGECPf chr5@1365   | 2.08E-10 | 0.007057 |
| 19July2011 | 8147  | 739.37  | -28.8761 | 3 K.CKFQAAf chr2@1455   | 2.83E-10 | 0.008654 |
| 19July2011 | 9242  | 490.62  | -15.0421 | 3 _RLEQQDf chr5@1644    | 1.58E-10 | 0.003673 |
| 19July2011 | 6227  | 705.69  | -14.4124 | 3 K.NQNSMF chr4@2270    | 4.72E-11 | 0.003096 |
| 1Mar2011-  | 18700 | 920.41  | 28.31434 | 1 R.GTFFCCK Splice@chr  | 7.76E-11 | 0.001691 |
| 1Mar2011-  | 8187  | 748.88  | 19.20669 | 4 R.NKYCCCS chrX@8695   | 3.06E-10 | 0.006434 |
| 1Mar2011-  | 269   | 454.72  | 6.120877 | 2 K.HFEGGFS chr1@5146   | 1.99E-10 | 0.005034 |
| 1Mar2011-  | 12478 | 850.42  | 25.00643 | 3 K.RASGWA chrX@1018    | 1.08E-10 | 0.001941 |
| 1Mar2011-  | 12265 | 850.42  | 25.00643 | 3 K.RASGWA chrX@1018    | 1.34E-10 | 0.003856 |
| 1Mar2011-  | 13569 | 850.42  | 25.00643 | 3 K.RASGWA chrX@1018    | 1.33E-10 | 0.00374  |
| 1Mar2011-  | 13127 | 850.42  | 25.00643 | 3 K.RASGWA chrX@1018    | 2.96E-10 | 0.007367 |
| 1Mar2011-  | 13600 | 850.42  | 25.00643 | 3 K.RASGWA chrX@1018    | 3.96E-10 | 0.00982  |
| 1Mar2011-  | 13782 | 850.42  | 25.00643 | 3 K.RASGWA chrX@1018    | 3.24E-10 | 0.007648 |
| 19July2011 | 8585  | 1082.54 | -21.1993 | 2 R.NLGNLFK chr5@1945   | 6.45E-11 | 0.001492 |
| 1Mar2011-  | 3411  | 737.44  | -7.67007 | 2 R.QEATGEK Splice@chr  | 3.38E-10 | 0.007319 |
| 1Mar2011-  | 7128  | 431.58  | -18.2386 | 3 R.ANYLLKK Splice@chr  | 3.79E-10 | 0.008183 |
| 1Mar2011-  | 7685  | 431.58  | -18.2386 | 3 R.ANYLLKK Splice@chr  | 4.66E-10 | 0.009846 |
| 1Mar2011-  | 8366  | 778.06  | -15.4997 | 3 K.K+14.016 chr4@1027  | 3.07E-10 | 0.008746 |
| 1Mar2011-  | 15008 | 963.48  | 20.73713 | 2 K.QRYGQCI chr3@2475   | 1.74E-10 | 0.004995 |
| 19July2011 | 5032  | 581.28  | -4.45409 | 3 _ARCHGVI Splice@chr   | 3.73E-10 | 0.009272 |
| 1Mar2011-  | 6926  | 506.3   | -27.721  | 2 R.VLVIPSNf chr2@1100  | 2.31E-10 | 0.008133 |
| 1Mar2011-  | 11510 | 861.46  | 21.56434 | 2 _KSFEVAIE Splice@chr  | 3.68E-15 | 0        |
| 1Mar2011-  | 16208 | 687.76  | 17.20651 | 5 R.FSRAQMf chr1@1455   | 2.57E-10 | 0.006451 |
| 1Mar2011-  | 21797 | 536.29  | -17.8353 | 3 K.FKIEKNY chr3@1172   | 3.78E-10 | 0.008842 |
| 1Mar2011-  | 13776 | 910     | -1.71198 | 2 K.TEWSIRSf chr4@1042  | 3.30E-10 | 0.008597 |
| 1Mar2011-  | 3413  | 533.66  | 13.50446 | 5 M.ISCKNDS chr3@1001   | 1.18E-10 | 0.00335  |
| 1Mar2011-  | 18673 | 1191.66 | -9.52337 | 4 _SYEKYSEY chr5@1136   | 2.72E-10 | 0.007289 |
| 1Mar2011-  | 11857 | 1183.61 | 22.53913 | 2 _WSLWWI Splice@chr    | 2.27E-10 | 0.004504 |
| 1Mar2011-  | 13871 | 1145.6  | 4.479304 | 2 N.VDWKTI Splice@chr   | 1.65E-11 | 1.70E-04 |
| 1Mar2011-  | 15520 | 1145.59 | -4.266   | 2 N.VDWKTI Splice@chr   | 1.98E-10 | 0.004027 |
| 1Mar2011-  | 16032 | 1145.6  | 4.479304 | 2 N.VDWKTI Splice@chr   | 5.81E-12 | 0        |
| 19July2011 | 14416 | 776.76  | -17.3943 | 3 K.IKYKTK+1 Splice@chr | 1.71E-10 | 0.005107 |
| 19July2011 | 11730 | 920.49  | 20.12162 | 3 R.MASK+14 chr5@6265   | 2.64E-10 | 0.005001 |

|            |       |         |          |                          |          |          |
|------------|-------|---------|----------|--------------------------|----------|----------|
| 1Mar2011-  | 20485 | 816.45  | -0.52394 | 4 K.YFRKIGNI chr2@1195   | 6.48E-11 | 0.003223 |
| 19July2011 | 9948  | 859.14  | 1.707017 | 3 K.SVCGK+1 chrX@1435    | 3.15E-10 | 0.008351 |
| 19July2011 | 4335  | 485.25  | 21.36468 | 2 K.MNTEFLS chr5@7280    | 2.06E-10 | 0.005658 |
| 1Mar2011-  | 13373 | 661.39  | 17.1596  | 2 R.AFIIRM+ chrX@7385    | 3.42E-10 | 0.008433 |
| 19July2011 | 8933  | 559.65  | 22.28877 | 3 R.SSWIDDS chr1@8914    | 3.54E-10 | 0.008339 |
| 19July2011 | 8670  | 905.46  | -18.7599 | 2 P.ECFLIELIE chr3@5832  | 4.77E-10 | 0.00967  |
| 19July2011 | 3597  | 552.28  | 22.62571 | 4 R.DQNK+1 chrX@1582     | 1.78E-10 | 0.006127 |
| 1Mar2011-  | 11335 | 785.39  | 7.904509 | 2 K.LEGAGRN chrX@9675    | 4.49E-10 | 0.009842 |
| 1Mar2011-  | 15673 | 1145.59 | -24.1024 | 3 K.AK+14.01 chr2@4435   | 3.67E-10 | 0.009012 |
| 1Mar2011-  | 13047 | 750     | 1.825373 | 5 K.SNIFSFKP chrX@1524   | 6.66E-12 | 1.62E-04 |
| 1Mar2011-  | 13629 | 750     | 1.825373 | 5 K.SNIFSFKP chrX@1524   | 1.45E-10 | 0.004056 |
| 19July2011 | 9757  | 862.98  | -6.97743 | 2 G.QK+14.0 chrX@1685    | 3.63E-10 | 0.008131 |
| 1Mar2011-  | 16597 | 938.52  | 13.77806 | 2 K.FFYNQRC chr4@9361    | 3.04E-10 | 0.008485 |
| 19July2011 | 2566  | 528.27  | -16.9005 | 3 H.FFSFSGFI chr5@3748   | 3.25E-10 | 0.00883  |
| 1Mar2011-  | 9410  | 673.36  | -18.7908 | 2 R.RMKLREL chr2@2747    | 2.06E-10 | 0.004899 |
| 1Mar2011-  | 16553 | 936.52  | -13.3745 | 2 K.WFHMLS chr2@1022     | 9.04E-11 | 0.002793 |
| 19July2011 | 5505  | 547.99  | -5.54412 | 3 K.HKFAEIK+ chr3@4891   | 3.11E-10 | 0.007429 |
| 19July2011 | 4787  | 781.42  | 19.16154 | 2 R.SRRIFLEN chr4@1145   | 7.56E-11 | 0.001885 |
| 1Mar2011-  | 13345 | 822.95  | -1.29899 | 2 _._NKVINFD Splice@chr  | 2.11E-11 | 8.07E-04 |
| 19July2011 | 8312  | 643.41  | -6.74572 | 2 _._QLSINSK+ chr2@5615  | 8.06E-11 | 0.001764 |
| 19July2011 | 14356 | 643.4   | -22.2324 | 2 _._QLSINSK+ chr2@5615  | 2.16E-10 | 0.004914 |
| 19July2011 | 3225  | 622.66  | -28.126  | 3 D.IQTFLSV5 chrX@4641   | 3.68E-10 | 0.007068 |
| 19July2011 | 4891  | 571.33  | 16.76655 | 3 _._SKINVLEN Splice@chr | 6.77E-11 | 0.002875 |
| 1Mar2011-  | 17431 | 1114.09 | 3.42967  | 2 _._ERNNFRF Splice@chr  | 7.33E-11 | 0.001905 |
| 1Mar2011-  | 341   | 470.23  | -25.3644 | 2 _._NQVAQSI chr4@1630   | 3.21E-10 | 0.007545 |
| 1Mar2011-  | 7750  | 895     | -6.96376 | 2 I.NK+14.01 chr5@2085   | 4.16E-10 | 0.00872  |
| 1Mar2011-  | 8834  | 895     | -6.96376 | 2 I.NK+14.01 chr5@2085   | 3.53E-10 | 0.009722 |
| 1Mar2011-  | 7222  | 895.01  | 4.232871 | 2 I.NK+14.01 chr5@2085   | 1.69E-10 | 0.00397  |
| 1Mar2011-  | 7657  | 903.98  | 4.972106 | 2 K.NLPLVSN Splice@chr   | 3.25E-13 | 0        |
| 1Mar2011-  | 4902  | 903.48  | 6.830784 | 2 K.NLPLVSN Splice@chr   | 6.91E-14 | 0        |
| 1Mar2011-  | 4842  | 903.47  | -4.26079 | 2 K.NLPLVSN Splice@chr   | 3.54E-13 | 0        |
| 1Mar2011-  | 4982  | 903.48  | 6.830784 | 2 K.NLPLVSN Splice@chr   | 6.51E-14 | 0        |
| 1Mar2011-  | 6446  | 903.48  | 6.830784 | 2 K.NLPLVSN Splice@chr   | 4.80E-16 | 0        |
| 1Mar2011-  | 6499  | 903.98  | 4.972106 | 2 K.NLPLVSN Splice@chr   | 3.37E-14 | 0        |
| 1Mar2011-  | 6613  | 903.98  | 4.972106 | 2 K.NLPLVSN Splice@chr   | 8.29E-15 | 0        |
| 1Mar2011-  | 7313  | 903.47  | -4.26079 | 2 K.NLPLVSN Splice@chr   | 5.84E-16 | 0        |
| 1Mar2011-  | 7366  | 903.48  | 6.830784 | 2 K.NLPLVSN Splice@chr   | 1.44E-17 | 0        |
| 1Mar2011-  | 7424  | 903.98  | 4.972106 | 2 K.NLPLVSN Splice@chr   | 3.19E-14 | 0        |
| 1Mar2011-  | 7044  | 903.48  | 6.830784 | 2 K.NLPLVSN Splice@chr   | 5.52E-15 | 0        |
| 1Mar2011-  | 6202  | 903.48  | 6.830784 | 2 K.NLPLVSN Splice@chr   | 2.26E-13 | 0        |
| 1Mar2011-  | 6326  | 903.48  | 6.830784 | 2 K.NLPLVSN Splice@chr   | 6.21E-15 | 0        |
| 1Mar2011-  | 6269  | 903.48  | 6.830784 | 2 K.NLPLVSN Splice@chr   | 4.36E-17 | 0        |
| 1Mar2011-  | 7440  | 903.48  | 6.830784 | 2 K.NLPLVSN Splice@chr   | 1.52E-14 | 0        |
| 1Mar2011-  | 7381  | 903.48  | 6.830784 | 2 K.NLPLVSN Splice@chr   | 1.34E-14 | 0        |
| 1Mar2011-  | 6238  | 903.97  | -6.11946 | 2 K.NLPLVSN Splice@chr   | 2.05E-12 | 5.77E-04 |
| 1Mar2011-  | 6296  | 903.48  | 6.830784 | 2 K.NLPLVSN Splice@chr   | 2.54E-13 | 0        |
| 1Mar2011-  | 7202  | 903.48  | 6.830784 | 2 K.NLPLVSN Splice@chr   | 3.95E-16 | 0        |

|            |       |         |          |                        |          |          |
|------------|-------|---------|----------|------------------------|----------|----------|
| 1Mar2011-  | 5203  | 903.47  | -4.26079 | 2 K.NLPLVSN Splice@chr | 1.38E-15 | 0        |
| 1Mar2011-  | 6257  | 903.98  | 4.972106 | 2 K.NLPLVSN Splice@chr | 2.20E-15 | 0        |
| 1Mar2011-  | 6201  | 903.47  | -4.26079 | 2 K.NLPLVSN Splice@chr | 5.61E-13 | 0        |
| 1Mar2011-  | 5303  | 903.48  | 6.830784 | 2 K.NLPLVSN Splice@chr | 5.61E-12 | 0        |
| 1Mar2011-  | 1047  | 477.25  | 8.138221 | 2 K.IPQYNYR Splice@chr | 3.77E-10 | 0.007941 |
| 1Mar2011-  | 2661  | 477.76  | 25.63444 | 2 K.IPQYNYR Splice@chr | 2.47E-10 | 0.005051 |
| 1Mar2011-  | 3504  | 477.25  | 8.138221 | 2 K.IPQYNYR Splice@chr | 2.30E-10 | 0.005344 |
| 19July2011 | 4842  | 651.66  | -18.3231 | 3 K.MGDEK+ chr5@8785   | 3.32E-10 | 0.009835 |
| 19July2011 | 6926  | 609.98  | -6.65079 | 3 K.LAMFLM Splice@chr  | 1.62E-10 | 0.004254 |
| 19July2011 | 7233  | 609.98  | -6.65079 | 3 K.LAMFLM Splice@chr  | 1.34E-10 | 0.004948 |
| 19July2011 | 7290  | 609.98  | -6.65079 | 3 K.LAMFLM Splice@chr  | 3.14E-10 | 0.008007 |
| 19July2011 | 8773  | 696.7   | 8.339741 | 3 R.ENSFAFLI chrX@2292 | 2.75E-10 | 0.008482 |
| 1Mar2011-  | 19661 | 1069.6  | -4.99909 | 2 K.KSGK+14 chr4@7068  | 3.64E-10 | 0.008471 |
| 19July2011 | 6478  | 1008.82 | 19.56912 | 3 K.MFVGMk chr5@1615   | 7.37E-12 | 2.53E-04 |
| 19July2011 | 101   | 583.79  | 5.131828 | 2 R.M+15.99 chr3@9336  | 3.40E-10 | 0.006492 |
| 19July2011 | 4795  | 686.72  | -11.6054 | 3 K.DRSLSKSI chr5@1736 | 2.20E-10 | 0.005127 |
| 19July2011 | 4100  | 686.72  | -11.6054 | 3 K.DRSLSKSI chr5@1736 | 1.89E-10 | 0.007552 |
| 1Mar2011-  | 16811 | 978.09  | -12.7431 | 2 R.LK+14.01 chr3@3477 | 3.45E-10 | 0.008277 |
| 1Mar2011-  | 3397  | 529.61  | -14.4714 | 3 K.NVSIFYL chr4@1148  | 2.46E-10 | 0.00417  |
| 1Mar2011-  | 481   | 595.34  | -28.2404 | 2 _RK+14.01 chr4@6356  | 3.06E-10 | 0.007509 |
| 1Mar2011-  | 960   | 595.34  | -28.2404 | 2 _RK+14.01 chr4@6356  | 6.87E-11 | 0.001243 |
| 1Mar2011-  | 995   | 595.34  | -28.2404 | 2 _RK+14.01 chr4@6356  | 1.54E-10 | 0.003609 |
| 1Mar2011-  | 389   | 595.34  | -28.2404 | 2 _RK+14.01 chr4@6356  | 3.41E-10 | 0.009393 |
| 1Mar2011-  | 1119  | 595.34  | -28.2404 | 2 _RK+14.01 chr4@6356  | 1.52E-10 | 0.004129 |
| 1Mar2011-  | 403   | 595.34  | -28.2404 | 2 _RK+14.01 chr4@6356  | 3.37E-11 | 0.00171  |
| 1Mar2011-  | 357   | 595.34  | -28.2404 | 2 _RK+14.01 chr4@6356  | 3.67E-10 | 0.007748 |
| 1Mar2011-  | 554   | 595.34  | -28.2404 | 2 _RK+14.01 chr4@6356  | 1.04E-11 | 5.04E-04 |
| 1Mar2011-  | 329   | 595.34  | -28.2404 | 2 _RK+14.01 chr4@6356  | 5.70E-11 | 0.001652 |
| 1Mar2011-  | 260   | 595.34  | -28.2404 | 2 _RK+14.01 chr4@6356  | 6.82E-12 | 7.23E-04 |
| 1Mar2011-  | 231   | 595.34  | -28.2404 | 2 _RK+14.01 chr4@6356  | 2.44E-10 | 0.005961 |
| 1Mar2011-  | 430   | 595.34  | -28.2404 | 2 _RK+14.01 chr4@6356  | 6.66E-11 | 0.002732 |
| 1Mar2011-  | 308   | 595.34  | -28.2404 | 2 _RK+14.01 chr4@6356  | 3.19E-11 | 0.001254 |
| 1Mar2011-  | 791   | 595.34  | -28.2404 | 2 _RK+14.01 chr4@6356  | 6.45E-11 | 0.002312 |
| 1Mar2011-  | 96    | 595.34  | -28.2404 | 2 _RK+14.01 chr4@6356  | 4.80E-11 | 9.27E-04 |
| 1Mar2011-  | 420   | 595.34  | -28.2404 | 2 _RK+14.01 chr4@6356  | 2.88E-10 | 0.0069   |
| 1Mar2011-  | 570   | 595.34  | -28.2404 | 2 _RK+14.01 chr4@6356  | 2.00E-10 | 0.005547 |
| 1Mar2011-  | 500   | 595.34  | -28.2404 | 2 _RK+14.01 chr4@6356  | 4.02E-11 | 0.00122  |
| 1Mar2011-  | 395   | 595.34  | -28.2404 | 2 _RK+14.01 chr4@6356  | 2.34E-10 | 0.003803 |
| 1Mar2011-  | 342   | 595.34  | -28.2404 | 2 _RK+14.01 chr4@6356  | 1.88E-10 | 0.002899 |
| 1Mar2011-  | 318   | 595.34  | -28.2404 | 2 _RK+14.01 chr4@6356  | 3.27E-10 | 0.006458 |
| 1Mar2011-  | 292   | 595.34  | -28.2404 | 2 _RK+14.01 chr4@6356  | 1.98E-10 | 0.003717 |
| 1Mar2011-  | 629   | 595.34  | -28.2404 | 2 _RK+14.01 chr4@6356  | 1.64E-10 | 0.005843 |
| 1Mar2011-  | 1378  | 595.34  | -28.2404 | 2 _RK+14.01 chr4@6356  | 6.60E-11 | 0.001646 |
| 1Mar2011-  | 368   | 595.34  | -28.2404 | 2 _RK+14.01 chr4@6356  | 3.31E-12 | 1.84E-04 |
| 1Mar2011-  | 585   | 595.34  | -28.2404 | 2 _RK+14.01 chr4@6356  | 6.65E-12 | 1.84E-04 |
| 1Mar2011-  | 446   | 595.34  | -28.2404 | 2 _RK+14.01 chr4@6356  | 3.11E-10 | 0.00724  |
| 1Mar2011-  | 457   | 595.34  | -28.2404 | 2 _RK+14.01 chr4@6356  | 2.70E-10 | 0.006809 |

|            |       |         |          |                          |          |          |
|------------|-------|---------|----------|--------------------------|----------|----------|
| 1Mar2011-  | 176   | 595.34  | -28.2404 | 2 _..RK+14.01 chr4@6356  | 8.85E-11 | 0.003299 |
| 1Mar2011-  | 159   | 595.34  | -28.2404 | 2 _..RK+14.01 chr4@6356  | 1.82E-10 | 0.006409 |
| 1Mar2011-  | 298   | 595.34  | -28.2404 | 2 _..RK+14.01 chr4@6356  | 6.43E-12 | 3.19E-04 |
| 1Mar2011-  | 14681 | 921.99  | -6.59643 | 2 K.FPKPAIAC chr1@2106   | 2.46E-10 | 0.00588  |
| 19July2011 | 1138  | 430.73  | -12.6409 | 2 K.TLDWGLI chr5@1381    | 2.17E-10 | 0.007798 |
| 19July2011 | 7676  | 941.14  | 18.64032 | 3 R.STRCCF chr5@7038     | 1.63E-10 | 0.004697 |
| 1Mar2011-  | 15790 | 1012.02 | -17.4845 | 2 K.FQDFLAF Splice@chr   | 1.72E-10 | 0.005433 |
| 19July2011 | 9263  | 716.39  | -5.34658 | 3 K.HNLLNIF chr5@2525    | 3.67E-10 | 0.005731 |
| 19July2011 | 2735  | 484.91  | 8.661083 | 3 K.SDNWKR Splice@chr    | 2.20E-10 | 0.005358 |
| 1Mar2011-  | 16229 | 806.98  | -19.2832 | 2 K.EKSNLTTI chrX@4370   | 3.46E-10 | 0.009209 |
| 1Mar2011-  | 978   | 459.97  | -29.5218 | 4 R.TFTSKIFQ Splice@chr  | 3.39E-10 | 0.006458 |
| 19July2011 | 11402 | 1112.88 | -24.5919 | 3 R.EPISLKH C Splice@chr | 3.03E-10 | 0.005694 |
| 1Mar2011-  | 7040  | 997.46  | -25.1537 | 3 K.GPQQPL Splice@chr    | 1.38E-11 | 2.84E-04 |
| 1Mar2011-  | 8506  | 997.46  | -25.1537 | 3 K.GPQQPL Splice@chr    | 1.79E-10 | 0.004361 |
| 19July2011 | 9222  | 855.48  | 19.57227 | 2 K.KNTEK+1 chr2@2196    | 2.01E-10 | 0.003867 |
| 19July2011 | 375   | 656.4   | -14.5277 | 2 R.ISIVNLLR Splice@chr  | 1.08E-10 | 0.001778 |
| 1Mar2011-  | 11015 | 413.76  | 10.12944 | 2 K.IILGDAPK chrX@1392   | 1.85E-10 | 0.005202 |
| 1Mar2011-  | 9245  | 413.76  | 10.12944 | 2 K.IILGDAPK chrX@1392   | 7.79E-11 | 0.002652 |
| 1Mar2011-  | 15976 | 851.41  | 8.612727 | 2 K.SCRMDT chr3@4336     | 3.01E-10 | 0.005838 |
| 1Mar2011-  | 8319  | 755.41  | -23.0668 | 3 N.M+15.99 chr1@8505    | 2.55E-10 | 0.006853 |
| 1Mar2011-  | 12233 | 812.77  | -10.0032 | 3 R.K+14.016 chrX@7958   | 1.88E-10 | 0.004545 |
| 1Mar2011-  | 11584 | 662.7   | 0.799423 | 3 R.RSTLVPV chr3@1758    | 1.18E-10 | 0.003626 |
| 1Mar2011-  | 8642  | 1019.86 | 26.11961 | 3 R.HWAPNR chrX@1690     | 9.92E-12 | 1.97E-04 |
| 1Mar2011-  | 4263  | 602.35  | -15.0215 | 2 E.LLTPRESF chr4@1239   | 3.28E-10 | 0.009265 |
| 19July2011 | 7963  | 853.81  | -16.5858 | 3 K.KNK+14.( chr3@9948   | 7.81E-11 | 0.002369 |
| 1Mar2011-  | 9757  | 889.48  | 13.73954 | 2 L.FLVNEHF chr2@5354    | 6.42E-11 | 0.001493 |
| 1Mar2011-  | 5069  | 547.32  | -22.0829 | 2 _..IFKKNTV chr4@1466   | 2.71E-10 | 0.009433 |
| 1Mar2011-  | 5235  | 547.32  | -22.0829 | 2 _..IFKKNTV chr4@1466   | 2.62E-10 | 0.009457 |
| 1Mar2011-  | 5291  | 547.32  | -22.0829 | 2 _..IFKKNTV chr4@1466   | 1.64E-10 | 0.006413 |
| 1Mar2011-  | 5558  | 547.32  | -22.0829 | 2 _..IFKKNTV chr4@1466   | 2.12E-10 | 0.005484 |
| 19July2011 | 1222  | 513.23  | -12.7497 | 2 K.SSFQDAS chr5@2040    | 2.77E-10 | 0.006917 |
| 19July2011 | 9018  | 803.47  | 15.71928 | 3 K.SASRQFV chr1@2384    | 2.11E-10 | 0.005565 |
| 1Mar2011-  | 387   | 423.02  | -24.9253 | 4 R.FLLVSRGI Splice@chr  | 1.46E-10 | 0.004731 |
| 1Mar2011-  | 12834 | 1061.56 | -19.3159 | 2 R.ERARENS chr4@1215    | 8.62E-11 | 0.003005 |
| 19July2011 | 9882  | 636.87  | -11.5184 | 2 N.WQIAGF chr4@1566     | 1.04E-10 | 0.003265 |
| 1Mar2011-  | 14518 | 1156.61 | -8.97877 | 2 _..DLLRTGSI Splice@chr | 3.07E-10 | 0.008839 |
| 19July2011 | 9687  | 859.9   | -23.9475 | 2 K.M+15.99 chr5@1907    | 2.95E-10 | 0.008631 |
| 1Mar2011-  | 8387  | 892.49  | 29.15023 | 2 K.M+15.99 Splice@chr   | 3.31E-10 | 0.008812 |
| 19July2011 | 4252  | 584.9   | 5.180627 | 2 R.ILPKTVK+ chrX@1069   | 1.88E-10 | 0.008865 |
| 19July2011 | 187   | 464.75  | -12.569  | 2 K.SKCAPLPI chr5@4147   | 3.06E-10 | 0.006507 |
| 1Mar2011-  | 1369  | 534.3   | 15.75392 | 2 K.IADFSVKI chr4@1296   | 2.33E-10 | 0.007615 |
| 1Mar2011-  | 3400  | 422.24  | 28.74499 | 4 K.EPK+14.0 chr2@4997   | 1.36E-10 | 0.003877 |
| 1Mar2011-  | 15025 | 885.99  | -13.2134 | 2 K.GRRQTPC chr1@2117    | 3.27E-10 | 0.007678 |
| 1Mar2011-  | 14370 | 413.98  | -12.5318 | 4 R.FMVVLK+ chr2@7936    | 2.56E-10 | 0.005262 |
| 19July2011 | 10392 | 982.12  | 1.907782 | 3 R.GEWSYKI chr3@1029    | 3.34E-10 | 0.005822 |
| 1Mar2011-  | 995   | 437.94  | -16.8557 | 3 K.QAFKHGI chr1@2569    | 2.90E-10 | 0.007179 |
| 1Mar2011-  | 936   | 437.94  | -16.8557 | 3 K.QAFKHGI chr1@2569    | 4.75E-11 | 0.001437 |

|            |       |         |          |                          |          |          |
|------------|-------|---------|----------|--------------------------|----------|----------|
| 1Mar2011-  | 15247 | 981.55  | -13.7311 | 2 G.LEQSRK+ Splice@chr   | 1.20E-10 | 0.004078 |
| 1Mar2011-  | 1478  | 544.35  | 12.98858 | 2 K.K+14.016 chr5@1375   | 4.41E-10 | 0.008583 |
| 1Mar2011-  | 14431 | 822     | -13.8276 | 2 R.DIIISLYIR' chr5@9671 | 2.71E-10 | 0.008362 |
| 1Mar2011-  | 16005 | 822     | -13.8276 | 2 R.DIIISLYIR' chr5@9671 | 3.84E-11 | 0.001285 |
| 1Mar2011-  | 15137 | 822.5   | -15.8707 | 2 R.DIIISLYIR' chr5@9671 | 3.02E-10 | 0.009093 |
| 1Mar2011-  | 18672 | 1150.63 | 23.07979 | 2 R.KFDNSFF chr2@5360    | 4.67E-10 | 0.009152 |
| 19July2011 | 3160  | 698.68  | -23.4262 | 3 R.KSQSPSD chrX@1059    | 3.35E-10 | 0.008276 |
| 1Mar2011-  | 15127 | 981.53  | 1.431697 | 2 R.QGGRQK chr2@1305     | 2.18E-10 | 0.00531  |
| 1Mar2011-  | 6689  | 640.36  | 4.539804 | 2 R.QGTK+14 chr5@1914    | 2.35E-10 | 0.00738  |
| 1Mar2011-  | 8805  | 628.37  | 3.696978 | 2 K.KHLAIENI chr3@7506   | 2.89E-10 | 0.006266 |
| 19July2011 | 10993 | 745.94  | 15.78458 | 2 R.ILKSDLAP chr1@4570   | 1.76E-10 | 0.004904 |
| 1Mar2011-  | 18516 | 1024.85 | -1.80818 | 3 R.LPVENQ\ Splice@chr   | 1.78E-22 | 0        |
| 1Mar2011-  | 20098 | 1024.52 | 2.623861 | 3 R.LPVENQ\ Splice@chr   | 4.08E-19 | 0        |
| 1Mar2011-  | 20121 | 1024.86 | 8.051182 | 3 R.LPVENQ\ Splice@chr   | 2.84E-20 | 0        |
| 1Mar2011-  | 16811 | 1024.86 | 8.051182 | 3 R.LPVENQ\ Splice@chr   | 8.87E-20 | 0        |
| 1Mar2011-  | 16825 | 1024.86 | 8.051182 | 3 R.LPVENQ\ Splice@chr   | 3.73E-19 | 0        |
| 1Mar2011-  | 4583  | 452.89  | -16.4781 | 3 R.VMEHCA chr5@1311     | 6.78E-11 | 0.001485 |
| 1Mar2011-  | 2622  | 587.36  | 15.68149 | 2 R.KITNIYRH chr5@1320   | 4.28E-10 | 0.009506 |
| 1Mar2011-  | 2528  | 587.36  | 15.68149 | 2 R.KITNIYRH chr5@1320   | 1.65E-10 | 0.005843 |
| 1Mar2011-  | 18062 | 1127.59 | -26.7467 | 2 A.ALHQB+1 chr1@6981    | 2.55E-10 | 0.006466 |
| 1Mar2011-  | 18788 | 1096.55 | -18.4826 | 3 I.LITPEISINI chr4@1102 | 3.69E-10 | 0.009338 |
| 1Mar2011-  | 1203  | 530.33  | -6.66114 | 4 _ .RKK+14.C Splice@chr | 2.85E-10 | 0.007108 |
| 1Mar2011-  | 15827 | 932.47  | 17.97616 | 1 _ .WNNREG chr3@1074    | 2.46E-10 | 0.005919 |
| 19July2011 | 653   | 478.26  | 6.735516 | 3 R.QSAIPAIA chr2@1419   | 1.65E-10 | 0.004948 |
| 1Mar2011-  | 14829 | 933.5   | 13.72129 | 2 R.K+14.016 chr5@1024   | 8.11E-11 | 0.003644 |
| 1Mar2011-  | 427   | 704.41  | 0.694171 | 1 R.FKGGAPl' chr5@1618   | 2.75E-10 | 0.006469 |
| 1Mar2011-  | 3338  | 680.89  | 17.02644 | 2 R.ERTTKQC chr2@4992    | 1.66E-10 | 0.00397  |
| 19July2011 | 1495  | 485.28  | -19.9315 | 2 R.FSKPPHK chr4@3587    | 4.61E-10 | 0.009989 |
| 1Mar2011-  | 424   | 529.76  | -28.511  | 2 R.PYFNFSKI Splice@chr  | 1.17E-10 | 0.002416 |
| 1Mar2011-  | 6900  | 465.75  | -9.32443 | 2 K.KNTQNP' chr5@1675    | 3.59E-10 | 0.009233 |
| 1Mar2011-  | 5886  | 602.79  | 6.752154 | 2 K.KQNEGN chrX@2901     | 2.24E-10 | 0.00781  |
| 1Mar2011-  | 6299  | 769.64  | -2.52131 | 4 K.KRFDDG/ chr3@5985    | 1.03E-10 | 0.00418  |
| 1Mar2011-  | 4171  | 462.25  | 16.21042 | 2 R.SFICAGIR chr5@5374   | 2.62E-10 | 0.005596 |
| 1Mar2011-  | 3578  | 462.24  | -5.49169 | 2 R.SFICAGIR chr5@5374   | 2.86E-10 | 0.007063 |
| 1Mar2011-  | 3403  | 462.24  | -5.49169 | 2 R.SFICAGIR chr5@5374   | 1.32E-10 | 0.004742 |
| 1Mar2011-  | 4419  | 462.24  | -5.49169 | 2 R.SFICAGIR chr5@5374   | 2.41E-10 | 0.003989 |
| 19July2011 | 7408  | 906.5   | 15.95168 | 2 K.WLILSM+ chrX@1055    | 2.32E-10 | 0.009986 |
| 19July2011 | 4601  | 453.26  | 5.541838 | 2 _ .KTCVAIGI chr4@1354  | 2.23E-10 | 0.005169 |
| 19July2011 | 8853  | 1082.54 | -7.90069 | 2 K.NKNYSKL chr1@5398    | 4.89E-10 | 0.008534 |
| 19July2011 | 1723  | 400.54  | 10.04197 | 3 R.IFGTKSM chr3@1571    | 2.25E-10 | 0.005332 |
| 1Mar2011-  | 11880 | 918.03  | -29.2662 | 2 R.KIDKRTFF chr2@1522   | 2.50E-10 | 0.006064 |
| 1Mar2011-  | 11188 | 675.36  | 13.87194 | 1 K.GGQIGDl' chr5@9685   | 3.02E-10 | 0.009093 |
| 19July2011 | 9512  | 786.41  | -25.0226 | 1 R.NVMPGL chr3@1188     | 2.02E-10 | 0.005031 |
| 1Mar2011-  | 5537  | 597.01  | -2.93568 | 3 _ .SGISIEVN Splice@chr | 2.58E-10 | 0.005615 |
| 1Mar2011-  | 5648  | 597.01  | -2.93568 | 3 _ .SGISIEVN Splice@chr | 3.48E-10 | 0.007974 |
| 1Mar2011-  | 3468  | 567.78  | -10.015  | 4 D.FQIISMYl' chr4@1594  | 1.52E-10 | 0.004331 |
| 1Mar2011-  | 5755  | 567.78  | -10.015  | 4 D.FQIISMYl' chr4@1594  | 2.12E-10 | 0.005691 |

|            |       |         |          |                         |          |          |
|------------|-------|---------|----------|-------------------------|----------|----------|
| 1Mar2011-  | 4343  | 567.78  | -10.015  | 4 D.FQIISMY chr4@1594   | 2.92E-10 | 0.009325 |
| 1Mar2011-  | 20430 | 814.46  | -13.4751 | 2 K.YVMLFSK chrX@2146   | 2.85E-10 | 0.007108 |
| 1Mar2011-  | 1145  | 572.34  | -18.3352 | 2 K.VDIPKK5 chrX@1558   | 2.95E-10 | 0.006964 |
| 19July2011 | 7606  | 759.36  | -27.2833 | 2 K.CKKSQNS chr3@6977   | 4.74E-10 | 0.008346 |
| 1Mar2011-  | 16647 | 893.03  | 0.547387 | 2 K.VWK+14. chr5@1507   | 2.04E-10 | 0.00562  |
| 19July2011 | 9476  | 929.15  | 3.068836 | 3 _ .PLRCLPR chr2@1454  | 2.66E-10 | 0.007214 |
| 19July2011 | 8288  | 511.97  | -11.2283 | 3 K.EIGK+14. chr5@1684  | 4.86E-10 | 0.009857 |
| 1Mar2011-  | 15487 | 1139.64 | 26.84225 | 2 K.RPHVLNL chr1@1225   | 4.58E-11 | 0.001321 |
| 1Mar2011-  | 7352  | 543.8   | -6.24454 | 2 K.PLTGSAS chr2@1266   | 1.97E-10 | 0.005627 |
| 1Mar2011-  | 2718  | 508.26  | -10.2877 | 2 R.HFGHRFS chr1@1387   | 2.79E-10 | 0.006851 |
| 1Mar2011-  | 6212  | 577.34  | 27.04123 | 3 R.ILGCSIVF chr3@6835  | 3.38E-10 | 0.008191 |
| 1Mar2011-  | 15890 | 869.52  | -18.7377 | 2 L.YFACIRK+ chr4@3344  | 2.82E-10 | 0.006695 |
| 1Mar2011-  | 16755 | 869.52  | -18.7377 | 2 L.YFACIRK+ chr4@3344  | 3.12E-10 | 0.007589 |
| 1Mar2011-  | 13951 | 869.52  | -18.7377 | 2 L.YFACIRKK chr4@3344  | 1.88E-10 | 0.005333 |
| 19July2011 | 454   | 422.89  | -17.7463 | 3 _ .AMDVSIL chr4@5445  | 2.03E-10 | 0.004527 |
| 1Mar2011-  | 11861 | 972.48  | 17.50791 | 2 R.DETFSAN chrX@1165   | 1.04E-10 | 0.003858 |
| 1Mar2011-  | 11243 | 1018.04 | 28.38696 | 2 K.ERESARC chr1@6459   | 1.14E-10 | 0.003739 |
| 1Mar2011-  | 11386 | 1018.05 | 21.82681 | 2 R.EWRTSQ Splice@chr   | 1.32E-10 | 0.003092 |
| 19July2011 | 611   | 598.26  | -11.9565 | 2 K.AAMESE5 chrX@5122   | 5.48E-10 | 0.009398 |
| 1Mar2011-  | 3114  | 545.27  | 13.34519 | 2 R.QDQTQC chr4@7484    | 7.25E-11 | 0.00187  |
| 1Mar2011-  | 3061  | 545.27  | 13.34519 | 2 R.QDQTQC chr4@7484    | 1.89E-10 | 0.005592 |
| 19July2011 | 10101 | 709.72  | -3.44484 | 3 R.LFWIIRSA chr1@1265  | 1.33E-10 | 0.004431 |
| 19July2011 | 8202  | 829.4   | -18.5668 | 3 K.RVDSEIEI Splice@chr | 8.20E-11 | 0.002819 |
| 1Mar2011-  | 18831 | 936.85  | -20.6089 | 3 K.LFLKTILG chr4@2886  | 7.00E-11 | 0.001243 |
| 1Mar2011-  | 16289 | 848.45  | 20.72052 | 2 S.SSLPGSKF chr5@1005  | 9.29E-11 | 0.001691 |
| 1Mar2011-  | 15186 | 847.95  | 22.70109 | 2 S.SSLPGSKF chr5@1005  | 2.67E-10 | 0.007638 |
| 1Mar2011-  | 9627  | 581.81  | 22.80455 | 2 K.QTPPNSS Splice@chr  | 3.27E-10 | 0.007192 |
| 19July2011 | 9468  | 699.37  | -14.2281 | 4 _ .VTQPTKP Splice@chr | 1.53E-10 | 0.007331 |
| 1Mar2011-  | 1845  | 460.29  | -9.57629 | 2 _ .NVKFVAL chr5@8974  | 3.08E-10 | 0.006195 |
| 19July2011 | 5563  | 481.94  | -23.154  | 3 R.LLSRHAV Splice@chr  | 2.34E-10 | 0.005422 |
| 19July2011 | 4162  | 558.29  | -24.4364 | 3 K.IDVSGQE chr4@3745   | 3.47E-11 | 0.001136 |
| 1Mar2011-  | 19397 | 1126.59 | 20.05232 | 3 R.RKGFDP chr2@7232    | 2.63E-10 | 0.007762 |
| 1Mar2011-  | 13119 | 781.48  | -15.5316 | 2 K.KTIEPKVS chrX@3575  | 2.94E-10 | 0.007106 |
| 1Mar2011-  | 504   | 420.71  | 27.30311 | 2 R.SSSSAAS Splice@chr  | 2.78E-10 | 0.00685  |
| 1Mar2011-  | 14182 | 874.45  | 6.398861 | 2 _ .FCEYSYLL chr4@1250 | 2.77E-10 | 0.005994 |
| 19July2011 | 4368  | 608     | 2.480324 | 3 K.QLLQK+1 chr4@6865   | 1.82E-10 | 0.008846 |
| 1Mar2011-  | 3782  | 447.51  | -4.92104 | 4 F.DMLQVV chr2@7645    | 4.47E-10 | 0.009611 |
| 19July2011 | 5508  | 559.61  | -21.4153 | 3 K.SDQKMR Splice@chr   | 1.99E-10 | 0.005031 |
| 1Mar2011-  | 15944 | 963.47  | -6.00331 | 3 G.K+14.016 chr4@4675  | 2.22E-11 | 8.07E-04 |
| 1Mar2011-  | 14284 | 963.46  | -16.3189 | 3 G.K+14.016 chr4@4675  | 3.60E-10 | 0.008685 |
| 1Mar2011-  | 14762 | 963.47  | -6.00331 | 3 G.K+14.016 chr4@4675  | 7.64E-11 | 0.002149 |
| 1Mar2011-  | 14402 | 963.47  | -6.00331 | 3 G.K+14.016 chr4@4675  | 1.15E-10 | 0.003717 |
| 1Mar2011-  | 16428 | 781.16  | -20.7182 | 4 K.YWVHKV chr2@8192    | 2.98E-10 | 0.006481 |
| 19July2011 | 8939  | 529.31  | 26.95791 | 3 K.RKNSRFP chr3@4220   | 4.18E-10 | 0.007041 |
| 1Mar2011-  | 14196 | 791.42  | -28.394  | 2 K.FCYVGKS Splice@chr  | 3.58E-10 | 0.00742  |
| 19July2011 | 10931 | 732.38  | -28.3574 | 3 K.WIDVMS chrX@2995    | 4.38E-11 | 0.001238 |
| 1Mar2011-  | 9610  | 909.97  | -24.1728 | 2 R.NCRRLQC chr2@6481   | 3.02E-10 | 0.007504 |

|            |       |         |          |                         |          |          |
|------------|-------|---------|----------|-------------------------|----------|----------|
| 19July2011 | 11194 | 767.08  | 24.43361 | 3 _SEAK+14. chrX@1001   | 1.89E-10 | 0.005068 |
| 1Mar2011-  | 4461  | 512.96  | 4.689358 | 3 R.ALISFKKS chr5@3694  | 2.08E-10 | 0.003942 |
| 1Mar2011-  | 3867  | 512.97  | 24.08264 | 3 R.ALISFKKS chr5@3694  | 1.52E-10 | 0.004287 |
| 1Mar2011-  | 18559 | 869.47  | -19.959  | 3 _SSVNRA\ Splice@chr   | 2.98E-10 | 0.007414 |
| 1Mar2011-  | 15042 | 630.84  | 18.99414 | 2 R.CSRQDV\ chrX@3244   | 2.80E-10 | 0.006944 |
| 1Mar2011-  | 8316  | 658.35  | -28.3322 | 3 R.TLSLDISK Splice@chr | 2.68E-10 | 0.006571 |
| 19July2011 | 6284  | 719.86  | -18.3239 | 4 K.KYSIEREP Splice@chr | 2.70E-10 | 0.005893 |
| 19July2011 | 7909  | 756.06  | -17.6758 | 3 K.NLEVFNS Splice@chr  | 2.82E-10 | 0.005694 |
| 1Mar2011-  | 3703  | 443.28  | -19.8395 | 3 K.INIISK+14 chr4@9661 | 3.42E-10 | 0.009393 |
| 1Mar2011-  | 13652 | 499.07  | -24.1007 | 5 K.ASVVLLQ chr3@7647   | 1.52E-10 | 0.002945 |
| 19July2011 | 11526 | 792.11  | 7.921007 | 3 R.FK+14.01 chrX@3355  | 2.67E-10 | 0.005694 |
| 1Mar2011-  | 6881  | 584.99  | -8.70954 | 3 R.THKYCKS chrX@1952   | 2.36E-10 | 0.00474  |
| 19July2011 | 876   | 512.26  | -9.84905 | 2 K.FSGSSSA\ chr2@6952  | 1.34E-11 | 2.27E-04 |
| 1Mar2011-  | 16828 | 760.42  | 10.55307 | 4 R.FRRYGFV chr1@3695   | 9.69E-11 | 0.003104 |
| 1Mar2011-  | 11964 | 942.46  | 7.131445 | 2 R.QGYCRR\ chr3@7090   | 7.35E-11 | 0.001592 |
| 1Mar2011-  | 2976  | 561.31  | -17.8242 | 2 K.SMLALTT chr5@2073   | 4.28E-10 | 0.009812 |
| 19July2011 | 7498  | 854.46  | -8.62137 | 2 _RLRSHSY\ chr2@1055   | 3.17E-10 | 0.00834  |
| 1Mar2011-  | 17633 | 1120.59 | 13.8817  | 2 R.EWRPRP\ chr4@1432   | 3.42E-10 | 0.00852  |
| 19July2011 | 8870  | 711.84  | 5.347727 | 4 R.YEM+15. chr1@9880   | 1.23E-10 | 0.004198 |
| 1Mar2011-  | 19782 | 1033.52 | 8.275925 | 1 R.YHCRNR\ chr3@3154   | 7.87E-11 | 0.001691 |
| 1Mar2011-  | 13063 | 743.39  | 7.974945 | 2 K.SFYNSGT chrX@1390   | 2.35E-10 | 0.006097 |
| 1Mar2011-  | 5931  | 714.35  | -15.6576 | 2 R.SVHNFIY\ chr2@7167  | 4.07E-10 | 0.009506 |
| 1Mar2011-  | 937   | 490.26  | -9.16918 | 2 K.SEGITFA\ chr5@1340  | 3.14E-10 | 0.007383 |
| 1Mar2011-  | 830   | 490.26  | -9.16918 | 2 K.SEGITFA\ chr5@1340  | 1.67E-10 | 0.003945 |
| 1Mar2011-  | 756   | 490.26  | -9.16918 | 2 K.SEGITFA\ chr5@1340  | 2.41E-10 | 0.005061 |
| 1Mar2011-  | 680   | 490.26  | -9.16918 | 2 K.SEGITFA\ chr5@1340  | 1.06E-10 | 0.002738 |
| 1Mar2011-  | 47    | 734.37  | -24.2486 | 1 K.AGNTDKI Splice@chr  | 4.68E-10 | 0.009971 |
| 1Mar2011-  | 12699 | 633.98  | 16.56334 | 3 R.QMMTLA chr5@4865    | 2.80E-10 | 0.007625 |
| 1Mar2011-  | 11752 | 819.93  | -21.4391 | 2 L.LLQPPPLF chr5@7971  | 3.36E-10 | 0.009552 |
| 1Mar2011-  | 15310 | 819.93  | -21.4391 | 2 L.LLQPPPLF chr5@7971  | 1.17E-10 | 0.00296  |
| 1Mar2011-  | 14000 | 819.93  | -21.4391 | 2 L.LLQPPPLF chr5@7971  | 2.80E-10 | 0.007323 |
| 1Mar2011-  | 13075 | 819.93  | -21.4391 | 2 L.LLQPPPLF chr5@7971  | 2.00E-11 | 1.56E-04 |
| 1Mar2011-  | 12189 | 819.93  | -21.4391 | 2 L.LLQPPPLF chr5@7971  | 6.82E-11 | 0.001968 |
| 1Mar2011-  | 2316  | 561.76  | -24.0542 | 2 K.LSDSSGSI Splice@chr | 3.01E-10 | 0.00886  |
| 1Mar2011-  | 3537  | 561.76  | -24.0542 | 2 K.LSDSSGSI Splice@chr | 2.19E-11 | 4.36E-04 |
| 1Mar2011-  | 14451 | 964     | -17.8097 | 2 K.SFRFMV\ chr3@9994   | 2.61E-10 | 0.006118 |
| 1Mar2011-  | 14941 | 1021.05 | 8.891136 | 2 K.FLDSFSG\ chr5@7950  | 2.43E-10 | 0.006558 |
| 19July2011 | 10486 | 899.45  | -20.4241 | 2 R.KKTKEEA chr1@7954   | 1.99E-10 | 0.006568 |
| 1Mar2011-  | 12184 | 898.93  | -27.4607 | 2 R.K+14.016 chr3@6866  | 3.43E-10 | 0.008298 |
| 19July2011 | 3360  | 611.32  | 28.30263 | 2 K.QFNNSNI Splice@chr  | 3.30E-10 | 0.004817 |
| 1Mar2011-  | 327   | 495.24  | 14.32561 | 2 K.TGYSSFE\ chr4@3823  | 2.88E-10 | 0.005922 |
| 1Mar2011-  | 7030  | 584.99  | 9.726827 | 3 K.THTHTKN chr2@1393   | 3.91E-10 | 0.00982  |
| 19July2011 | 11417 | 739.75  | 21.85066 | 3 R.LIQAGDK chr5@5231   | 3.05E-10 | 0.007032 |
| 1Mar2011-  | 13555 | 832.42  | -27.4444 | 4 K.ISCKISCKI chr4@9228 | 3.92E-10 | 0.008613 |
| 19July2011 | 9849  | 1171.59 | 19.5594  | 3 K.FCRLRGS\ chrX@1585  | 6.56E-11 | 0.002922 |
| 19July2011 | 9858  | 1184.94 | -29.075  | 3 R.QLFLVVA chr4@1228   | 4.00E-10 | 0.007049 |
| 1Mar2011-  | 1078  | 470.27  | -19.6521 | 3 R.IAKQKIG\ chr1@2057  | 2.10E-10 | 0.00562  |

|            |       |         |          |                         |          |          |
|------------|-------|---------|----------|-------------------------|----------|----------|
| 1Mar2011-  | 1115  | 449.75  | -0.68007 | 4 R.K+14.016 chr5@280   | 1.34E-10 | 0.003505 |
| 1Mar2011-  | 1145  | 449.75  | -0.68007 | 4 R.K+14.016 chr5@280   | 2.98E-11 | 6.43E-04 |
| 1Mar2011-  | 14315 | 847.46  | -1.11705 | 2 R.ALGK+14 chr4@2310   | 2.93E-10 | 0.007636 |
| 1Mar2011-  | 10785 | 713.87  | -19.1785 | 2 _DLWHLA Splice@chr    | 3.64E-11 | 5.75E-04 |
| 1Mar2011-  | 9861  | 713.87  | -19.1785 | 2 _DLWHLA Splice@chr    | 5.56E-11 | 0.001418 |
| 1Mar2011-  | 11216 | 713.87  | -19.1785 | 2 _DLWHLA Splice@chr    | 2.64E-11 | 0.001205 |
| 1Mar2011-  | 9119  | 713.87  | -19.1785 | 2 _DLWHLA Splice@chr    | 4.72E-11 | 9.00E-04 |
| 1Mar2011-  | 12397 | 1001.5  | -6.00009 | 3 K.AQDTVNI Splice@chr  | 1.56E-10 | 0.005658 |
| 19July2011 | 9007  | 909.47  | -19.2576 | 2 K.MINRLM chr5@707     | 2.00E-10 | 0.004613 |
| 1Mar2011-  | 9541  | 988.55  | 2.595822 | 1 K.CGGIGAR Splice@chr  | 3.57E-10 | 0.009558 |
| 1Mar2011-  | 8225  | 988.55  | 2.595822 | 1 K.CGGIGAR Splice@chr  | 5.99E-11 | 0.002427 |
| 1Mar2011-  | 8184  | 988.55  | 2.595822 | 1 K.CGGIGAR Splice@chr  | 2.40E-10 | 0.007434 |
| 1Mar2011-  | 12262 | 833     | -0.69605 | 2 K.YSALKVG chr5@1921   | 3.87E-10 | 0.009169 |
| 19July2011 | 1955  | 465.25  | -7.69109 | 4 R.RRDHLGF Splice@chr  | 9.18E-11 | 0.002175 |
| 19July2011 | 8697  | 783.91  | -26.728  | 4 K.TK+14.01 chrX@976   | 2.43E-11 | 0.00153  |
| 19July2011 | 8698  | 822.45  | 19.98776 | 4 K.YEESALES Splice@chr | 2.15E-10 | 0.005031 |
| 1Mar2011-  | 12671 | 756.91  | -15.8257 | 2 G.FDHINIM chr3@103    | 3.83E-10 | 0.009169 |
| 19July2011 | 9714  | 799.75  | 18.98537 | 3 R.EEVK+14 chrX@727    | 3.33E-10 | 0.008722 |
| 19July2011 | 955   | 730.36  | -25.246  | 2 R.YFSFEKIL chr5@203   | 3.25E-10 | 0.006418 |
| 1Mar2011-  | 1362  | 582.31  | 25.39083 | 3 K.TSSSFAQ chrX@169    | 1.70E-10 | 0.005054 |
| 19July2011 | 4558  | 415.56  | -11.3858 | 3 K.LAGMEL chr1@135     | 2.86E-10 | 0.009193 |
| 19July2011 | 270   | 444.27  | 7.377528 | 2 K.IGGGGG Splice@chr   | 5.67E-10 | 0.009568 |
| 1Mar2011-  | 3330  | 554.29  | 11.87168 | 2 R.MGETIEK chr1@997    | 2.50E-10 | 0.004987 |
| 1Mar2011-  | 227   | 460.29  | 12.79922 | 4 _KQEKYLK chr4@340     | 3.87E-10 | 0.009686 |
| 19July2011 | 7897  | 675.36  | 5.390935 | 2 R.KNSFPGE chr3@213    | 2.23E-10 | 0.006047 |
| 1Mar2011-  | 9557  | 431.58  | 2.268063 | 3 K.SKFNK+ chr1@842     | 3.61E-10 | 0.008171 |
| 1Mar2011-  | 11029 | 886.44  | -17.6207 | 2 S.THRHVAS Splice@chr  | 1.82E-10 | 0.002899 |
| 1Mar2011-  | 17615 | 916.82  | -19.6379 | 3 I.DAFIVV chr2@130     | 2.99E-10 | 0.007099 |
| 1Mar2011-  | 14650 | 916.82  | -19.6379 | 3 I.DAFIVV chr2@130     | 2.18E-10 | 0.007324 |
| 1Mar2011-  | 6827  | 599.38  | 10.15961 | 2 R.RELGSAV chr4@329    | 1.81E-10 | 0.004451 |
| 1Mar2011-  | 17260 | 988.54  | 3.399327 | 2 R.FM+15.9 chr5@205    | 3.06E-10 | 0.007691 |
| 1Mar2011-  | 18864 | 925.47  | 14.4591  | 1 _MSFVQA Splice@chr    | 3.23E-10 | 0.009213 |
| 1Mar2011-  | 17134 | 695.62  | -22.9189 | 4 V.FIILM+15 Splice@chr | 1.20E-10 | 0.002585 |
| 1Mar2011-  | 15708 | 1086.57 | -6.35462 | 3 K.FLISVSET chr5@316   | 2.49E-10 | 0.008227 |
| 1Mar2011-  | 17940 | 1086.56 | -15.5032 | 3 K.FLISVSET chr5@316   | 3.02E-10 | 0.008496 |
| 1Mar2011-  | 7029  | 586.3   | 2.919891 | 3 R.ILITTSTEC chr3@260  | 8.66E-11 | 0.002611 |
| 19July2011 | 5464  | 583.67  | -4.53924 | 3 K.LGEQREK Splice@chr  | 1.65E-10 | 0.007325 |
| 1Mar2011-  | 16389 | 1043.51 | 17.99356 | 1 R.SLGLYSD chr5@446    | 1.16E-10 | 0.002345 |
| 1Mar2011-  | 16336 | 1043.51 | 17.99356 | 1 R.SLGLYSD chr5@446    | 5.23E-10 | 0.009149 |
| 1Mar2011-  | 15627 | 1043.51 | 17.99356 | 1 R.SLGLYSD chr5@446    | 1.20E-10 | 0.003061 |
| 19July2011 | 1124  | 424.21  | -11.0434 | 2 K.NGGSRN chr1@150     | 5.77E-11 | 0.001537 |
| 1Mar2011-  | 14437 | 1036.06 | -23.4688 | 2 R.K+14.016 chr3@620   | 2.81E-11 | 0.001286 |
| 1Mar2011-  | 14637 | 630.84  | -4.70201 | 2 _K+14.016 chr3@136    | 2.69E-10 | 0.005932 |
| 1Mar2011-  | 16262 | 1145.07 | -28.1678 | 2 R.NIEFPKIP Splice@chr | 1.00E-10 | 0.002337 |
| 1Mar2011-  | 18167 | 936.52  | 27.07637 | 2 K.CWHRNS chr4@9231    | 3.11E-10 | 0.009093 |
| 19July2011 | 2310  | 569.33  | 2.577495 | 2 K.NDVIKKG Splice@chr  | 1.45E-10 | 0.00709  |
| 19July2011 | 3409  | 543.63  | -10.4232 | 3 R.VKYQVFA chr3@812    | 2.32E-10 | 0.003733 |

|            |       |         |          |                          |          |          |
|------------|-------|---------|----------|--------------------------|----------|----------|
| 19July2011 | 2554  | 439.74  | 22.42645 | 2 R.KSDDTRR chr4@1210    | 2.17E-10 | 0.005042 |
| 19July2011 | 1306  | 718.35  | -9.44436 | 2 R.WNFHRL chr4@3217     | 2.92E-10 | 0.006209 |
| 19July2011 | 16729 | 740.88  | -9.9817  | 2 K.KM+15.9 chr4@6259    | 7.35E-11 | 0.001768 |
| 1Mar2011-  | 12556 | 644.4   | -15.5206 | 2 K.KIISDFLP chr5@1401   | 3.38E-10 | 0.009552 |
| 1Mar2011-  | 15449 | 644.4   | -15.5206 | 2 K.KIISDFLP chr5@1401   | 3.46E-10 | 0.007465 |
| 1Mar2011-  | 3483  | 466.79  | -10.614  | 2 _..IIFVDVVK Splice@chr | 2.78E-10 | 0.006549 |
| 1Mar2011-  | 3436  | 572.81  | 4.056202 | 2 K.KMFTYVL chr5@3408    | 1.59E-10 | 0.003465 |
| 1Mar2011-  | 12588 | 1149.6  | 0.106278 | 2 N.LLCFPFC\ chrX@1185   | 1.52E-10 | 0.003669 |
| 19July2011 | 7882  | 546.31  | 2.940483 | 4 P.M+15.99 chr1@1454    | 9.11E-11 | 0.002704 |
| 1Mar2011-  | 12032 | 1018.55 | -8.81741 | 2 _..EWSVVS1 chrX@4194   | 4.14E-11 | 0.001548 |
| 1Mar2011-  | 19024 | 1045.07 | 3.656505 | 2 R.RQLWPM chr1@9321     | 2.99E-10 | 0.007267 |
| 19July2011 | 338   | 545.76  | -14.6773 | 2 R.K+14.016 chr1@1915   | 2.96E-10 | 0.007022 |
| 1Mar2011-  | 21099 | 1121.6  | -24.0258 | 3 K.NEENAQL chr5@4692    | 3.62E-11 | 0.001285 |
| 19July2011 | 9554  | 752.4   | -19.0419 | 3 R.YAMHSKI chr2@5276    | 2.99E-11 | 0.001175 |
| 19July2011 | 6894  | 635.87  | -15.9589 | 2 _..VELPFRLF Splice@chr | 6.48E-14 | 0        |
| 19July2011 | 6804  | 635.87  | -15.9589 | 2 _..VELPFRLF Splice@chr | 2.62E-12 | 0        |
| 19July2011 | 6845  | 635.87  | -15.9589 | 2 _..VELPFRLF Splice@chr | 3.65E-14 | 0        |
| 19July2011 | 6509  | 635.87  | -15.9589 | 2 _..VELPFRLF Splice@chr | 7.90E-12 | 6.27E-04 |
| 19July2011 | 6472  | 635.87  | -15.9589 | 2 _..VELPFRLF Splice@chr | 1.32E-12 | 0        |
| 1Mar2011-  | 7264  | 419.24  | -29.4782 | 3 R.TFSTIHK+1 chr2@1006  | 3.64E-10 | 0.009787 |
| 1Mar2011-  | 2388  | 407.27  | 15.24918 | 2 R.KPIGASLk Splice@chr  | 3.40E-10 | 0.009393 |
| 1Mar2011-  | 4536  | 614.33  | 0.199031 | 2 K.VLCSKVG chr5@1229    | 5.33E-10 | 0.009301 |
| 1Mar2011-  | 2444  | 580.29  | 4.530648 | 2 R.TIFTSM+ Splice@chr   | 3.08E-10 | 0.005789 |
| 1Mar2011-  | 3484  | 418.25  | 14.00748 | 3 K.KMTGISN chr2@2458    | 2.54E-10 | 0.007595 |
| 1Mar2011-  | 3158  | 418.25  | 14.00748 | 3 K.KMTGISN chr2@2458    | 2.95E-10 | 0.009593 |
| 1Mar2011-  | 17621 | 812.19  | -21.7318 | 4 K.K+14.016 chr2@1279   | 3.85E-10 | 0.008039 |
| 1Mar2011-  | 18228 | 910.69  | 17.28398 | 5 R.EK+14.01 chr1@1425   | 2.93E-10 | 0.006977 |
| 19July2011 | 14295 | 801.48  | 21.25044 | 2 K.K+14.016 Splice@chr  | 5.94E-11 | 0.001512 |
| 19July2011 | 15945 | 860.76  | -2.55569 | 3 R.WETIGSV Splice@chr   | 2.32E-10 | 0.005422 |
| 1Mar2011-  | 2472  | 460.26  | 0.734095 | 2 K.IVNSMNL chr5@1075    | 3.51E-10 | 0.007899 |
| 1Mar2011-  | 1651  | 459.76  | 4.390538 | 2 K.IVNSMNL chr5@1075    | 1.96E-10 | 0.005008 |
| 1Mar2011-  | 8993  | 910.48  | -11.1788 | 2 K.TK+14.01 chr5@1176   | 1.49E-10 | 0.003367 |
| 1Mar2011-  | 18695 | 989.45  | -6.98249 | 1 R.CSSWRHI chrX@7365    | 4.62E-10 | 0.009846 |
| 1Mar2011-  | 14617 | 914.48  | -10.4233 | 2 _..M+15.99 Splice@chr  | 1.61E-10 | 0.003691 |
| 1Mar2011-  | 8991  | 735.43  | -20.1113 | 2 T.RRFEIPRV chr1@3258   | 7.20E-11 | 0.003375 |
| 1Mar2011-  | 6552  | 735.43  | -20.1113 | 2 T.RRFEIPRV chr1@3258   | 1.75E-10 | 0.006108 |
| 1Mar2011-  | 18126 | 1152.58 | -14.5576 | 3 F.FEKTIELL\ chrX@2115  | 4.09E-10 | 0.009595 |
| 19July2011 | 9238  | 629.08  | 29.28845 | 4 R.QMWSM Splice@chr     | 1.53E-10 | 0.004844 |
| 1Mar2011-  | 3415  | 563.85  | -24.7239 | 2 K.LILSSQKP chr4@1302   | 3.23E-10 | 0.009479 |
| 1Mar2011-  | 19187 | 1171.65 | 23.49979 | 2 R.NVLNLNL chr5@7638    | 3.82E-11 | 0.001145 |
| 1Mar2011-  | 18419 | 743.06  | -24.346  | 3 _..TQIETK+1 chr5@1931  | 2.91E-10 | 0.006788 |
| 1Mar2011-  | 16972 | 889.46  | -7.30681 | 3 K.PVK+14.C chr4@4307   | 7.49E-11 | 0.001591 |
| 19July2011 | 759   | 665.35  | -26.9181 | 2 S.KNVLPPIH Splice@chr  | 2.72E-10 | 0.005893 |
| 19July2011 | 352   | 402.55  | 5.269426 | 3 R.FSSVLSTT chr3@5798   | 8.36E-11 | 0.002125 |
| 19July2011 | 21    | 402.88  | -5.72365 | 3 R.FSSVLSTT chr3@5798   | 2.77E-10 | 0.005817 |
| 19July2011 | 4860  | 703.91  | -25.7888 | 2 R.ILQKLTNI chrX@1265   | 1.73E-10 | 0.008059 |
| 19July2011 | 4805  | 703.91  | -25.7888 | 2 R.ILQKLTNI chrX@1265   | 8.27E-11 | 0.003593 |

|            |       |         |          |                         |          |          |
|------------|-------|---------|----------|-------------------------|----------|----------|
| 1Mar2011-  | 10923 | 627.66  | -8.28211 | 3 K.ERENDSL chr1@6290   | 3.31E-10 | 0.008812 |
| 1Mar2011-  | 14023 | 871.16  | -7.38835 | 3 R.PMSTPP1 chr2@4610   | 2.35E-11 | 6.11E-04 |
| 1Mar2011-  | 18116 | 1045.57 | 1.947715 | 3 E.LFQIIVM+ chr2@1065  | 1.20E-10 | 0.003012 |
| 1Mar2011-  | 18858 | 1045.57 | 1.947715 | 3 E.LFQIIVM+ chr2@1065  | 8.99E-11 | 0.002885 |
| 1Mar2011-  | 17090 | 1045.56 | -7.55713 | 3 E.LFQIIVM+ chr2@1065  | 1.37E-10 | 0.003002 |
| 1Mar2011-  | 11314 | 506.95  | 3.260768 | 3 R.MLDYLIT1 chrX@2506  | 3.87E-10 | 0.006212 |
| 19July2011 | 7982  | 910.49  | 14.49592 | 2 D.YLPFDIK+ chrX@1985  | 2.86E-10 | 0.004378 |
| 1Mar2011-  | 7495  | 967.62  | -10.7974 | 1 K.ILLAVVPS chr3@1167  | 9.35E-11 | 0.00322  |
| 19July2011 | 4478  | 521.78  | -1.75802 | 2 K.VLAMMMv chr2@4881   | 5.94E-12 | 0.001299 |
| 1Mar2011-  | 19401 | 1174.9  | -28.482  | 3 L.IKIFFFQf Splice@chr | 4.21E-10 | 0.00872  |
| 1Mar2011-  | 21981 | 1174.91 | -20.0222 | 3 L.IKIFFFQf Splice@chr | 1.04E-10 | 0.002874 |
| 1Mar2011-  | 19971 | 881.43  | -25.0842 | 4 L.IKIFFFQf Splice@chr | 1.71E-11 | 4.00E-04 |
| 1Mar2011-  | 20275 | 1174.9  | -28.482  | 3 L.IKIFFFQf Splice@chr | 8.92E-11 | 0.002646 |
| 19July2011 | 13199 | 697.37  | -21.824  | 2 K.KNCQFLT chr2@1385   | 2.35E-10 | 0.006902 |
| 1Mar2011-  | 15578 | 1159.13 | 5.616135 | 2 _K.MCFENI chrX@1561   | 5.03E-12 | 0        |
| 1Mar2011-  | 21316 | 1037.54 | 3.08329  | 3 K.K+14.016 chrX@2370  | 8.25E-11 | 0.001872 |
| 19July2011 | 7433  | 596.98  | 7.344957 | 3 K.LIFNFSAN chr3@6085  | 2.47E-10 | 0.004487 |
| 1Mar2011-  | 399   | 644.37  | -3.55868 | 2 R.NPKFREN chrX@1325   | 3.11E-10 | 0.007899 |
| 1Mar2011-  | 261   | 644.38  | 12.01193 | 2 R.NPKFREN chrX@1325   | 1.61E-11 | 2.54E-04 |
| 19July2011 | 8153  | 704.38  | 20.56611 | 2 R.DIPSDPR1 chr5@8957  | 1.54E-10 | 0.004146 |
| 1Mar2011-  | 21246 | 1014.55 | -23.3647 | 1 K.FPLARGE chr2@6144   | 1.87E-10 | 0.004545 |
| 19July2011 | 5984  | 741.71  | -0.54934 | 3 K.SNIVVCSI chr2@4666  | 5.27E-10 | 0.009058 |
| 19July2011 | 548   | 427.25  | -19.5661 | 2 R.KNAAHAI chrX@1131   | 3.90E-11 | 0.002796 |
| 1Mar2011-  | 9731  | 516.31  | -18.8719 | 3 K.NLIFSASR chr3@1268  | 2.32E-10 | 0.005636 |
| 1Mar2011-  | 2491  | 466.77  | 15.15439 | 2 _V.VVRDM chr3@7378    | 2.91E-10 | 0.007179 |
| 1Mar2011-  | 17690 | 1116.58 | -13.4367 | 2 K.ETMK+14 chr2@5201   | 1.60E-10 | 0.004025 |
| 19July2011 | 13544 | 850.42  | -6.17956 | 4 R.KINWDKI chr5@1816   | 8.08E-11 | 0.002125 |
| 1Mar2011-  | 11231 | 1177.08 | -2.77678 | 2 L.TTPRSPYC chrX@8928  | 4.30E-10 | 0.009122 |
| 19July2011 | 14099 | 769.08  | -1.35057 | 3 K.SGMLNIC Splice@chr  | 4.18E-10 | 0.008801 |
| 1Mar2011-  | 13056 | 562.31  | -5.65437 | 2 K.IIDFSKCIK chr1@9656 | 6.67E-11 | 0.002344 |
| 1Mar2011-  | 15705 | 1035.52 | 6.287516 | 2 K.M+15.99 chrX@1291   | 1.72E-10 | 0.003857 |
| 1Mar2011-  | 7877  | 721.44  | 22.68045 | 2 K.KSGQVPL chr3@1198   | 3.37E-10 | 0.009844 |
| 19July2011 | 10019 | 720.39  | -10.0594 | 2 Y.SLFEIFLLE chr3@5989 | 1.78E-10 | 0.004904 |
| 1Mar2011-  | 15355 | 1033.06 | 23.69853 | 2 K.RCWHEFI Splice@chr  | 1.41E-10 | 0.005522 |
| 1Mar2011-  | 15961 | 939.98  | -22.2302 | 2 R.ELKKYRFI chr2@1415  | 2.68E-10 | 0.006601 |
| 1Mar2011-  | 406   | 531.29  | 24.76395 | 3 _RMNFSW chr2@1256     | 3.05E-10 | 0.006055 |
| 1Mar2011-  | 10903 | 817.94  | -28.0804 | 4 R.K+14.016 Splice@chr | 1.07E-10 | 0.003407 |
| 1Mar2011-  | 7514  | 582.32  | -21.0687 | 3 K.LVSSSKKI chr1@1258  | 9.18E-11 | 0.002404 |
| 19July2011 | 11326 | 788.43  | -28.4463 | 2 _EKENRIK+ chr5@8931   | 2.58E-10 | 0.005647 |
| 19July2011 | 6406  | 788.43  | -28.4463 | 2 _EKENRIK+ chr5@8931   | 3.91E-12 | 2.89E-04 |
| 19July2011 | 4854  | 463.6   | 19.14729 | 3 K.K+14.016 chr5@1952  | 1.05E-10 | 0.002149 |
| 1Mar2011-  | 4351  | 618.88  | 16.59579 | 2 R.IIAISVNEI chr5@2094 | 7.81E-11 | 0.001809 |
| 1Mar2011-  | 4529  | 618.88  | 16.59579 | 2 R.IIAISVNEI chr5@2094 | 3.25E-10 | 0.008223 |
| 1Mar2011-  | 14730 | 1026.64 | 21.82254 | 2 R.TKLRKFG Splice@chr  | 2.55E-10 | 0.006853 |
| 19July2011 | 10614 | 942.47  | -25.0036 | 2 _DFSKNFP chr4@6381    | 2.10E-10 | 0.005031 |
| 1Mar2011-  | 15445 | 1165.61 | -19.3532 | 1 R.FHRHRF+ chrX@1694   | 3.40E-10 | 0.007776 |
| 1Mar2011-  | 2187  | 510.97  | 24.31413 | 3 R.K+14.016 chr2@1325  | 3.48E-10 | 0.007899 |

|            |       |         |          |                         |          |          |
|------------|-------|---------|----------|-------------------------|----------|----------|
| 1Mar2011-  | 12346 | 517.95  | 1.537285 | 3 R.M+15.99 Splice@chr  | 1.65E-10 | 0.003824 |
| 19July2011 | 10514 | 691.34  | 21.69142 | 3 R.RFCVQTS chr5@1307   | 3.58E-10 | 0.008471 |
| 1Mar2011-  | 2178  | 476.27  | 24.10782 | 2 K.NYELAGK chr5@6301   | 1.00E-10 | 0.002298 |
| 1Mar2011-  | 17608 | 1167.68 | 11.64628 | 2 _GRRLLWRI chr2@3362   | 2.94E-10 | 0.00825  |
| 1Mar2011-  | 6931  | 733.42  | -0.62397 | 2 F.FKLFFVFV chr2@2642  | 2.24E-10 | 0.005542 |
| 1Mar2011-  | 6943  | 733.42  | -0.62397 | 2 F.FKLFFVFV chr2@2642  | 1.64E-10 | 0.003612 |
| 1Mar2011-  | 3340  | 535.33  | 18.55649 | 3 K.LFK+14.0 chr1@1358  | 9.00E-11 | 0.0023   |
| 1Mar2011-  | 3507  | 535.33  | 18.55649 | 3 K.LFK+14.0 chr1@1358  | 3.45E-10 | 0.009476 |
| 19July2011 | 13082 | 836.92  | -13.1427 | 2 K.RPFWSYV chr2@1110   | 2.80E-10 | 0.008225 |
| 19July2011 | 11564 | 787.64  | -15.2699 | 4 K.MAKLMV chr4@1125    | 1.53E-10 | 0.005602 |
| 19July2011 | 3916  | 632.29  | 13.536   | 4 K.K+14.016 Splice@chr | 6.65E-11 | 0.00178  |
| 1Mar2011-  | 17813 | 1139.6  | -25.4992 | 2 K.VYRFHGK chr5@5234   | 5.23E-11 | 0.001561 |
| 1Mar2011-  | 9395  | 790.93  | -25.3191 | 2 _IIDFLGPIL chr4@1591  | 1.98E-10 | 0.004442 |
| 1Mar2011-  | 13477 | 875.01  | 7.192964 | 2 R.SVRAFLS chr2@1129   | 3.27E-10 | 0.009617 |
| 1Mar2011-  | 16937 | 1191.16 | -10.3481 | 4 K.LKIRVFKI chr3@3950  | 2.31E-10 | 0.006957 |
| 1Mar2011-  | 19086 | 1191.18 | 6.476289 | 4 K.LKIRVFKI chr3@3950  | 1.64E-10 | 0.004389 |
| 19July2011 | 3669  | 416.25  | -11.9176 | 2 K.IIAGSLEK chr3@1214  | 3.86E-10 | 0.008322 |
| 1Mar2011-  | 13137 | 954.04  | 19.96146 | 2 _FFLTKYLF chr3@8046   | 3.38E-10 | 0.006851 |
| 19July2011 | 6510  | 749.73  | -8.45356 | 3 R.WRLPASI chr4@1331   | 1.24E-10 | 0.005657 |
| 1Mar2011-  | 78    | 523.27  | -13.6732 | 2 K.KSVKCLS chrX@4088   | 4.26E-10 | 0.009243 |
| 1Mar2011-  | 6297  | 615.66  | 16.68273 | 3 R.NMDKHR chr5@6760    | 1.73E-10 | 0.003945 |
| 1Mar2011-  | 6233  | 615.99  | 9.434852 | 3 R.NMDKHR chr5@6760    | 5.12E-10 | 0.008616 |
| 19July2011 | 10786 | 797.09  | 0.64008  | 3 E.PVRLGGE chr2@1162   | 1.87E-10 | 0.005031 |
| 1Mar2011-  | 12166 | 1003.59 | 0.21425  | 2 K.K+14.016 chr5@2057  | 7.36E-11 | 0.001872 |
| 1Mar2011-  | 8289  | 1060.53 | -5.24509 | 1 _LVQDEN\ Splice@chr   | 3.44E-10 | 0.007466 |
| 1Mar2011-  | 8304  | 1060.52 | -14.7014 | 1 _LVQDEN\ Splice@chr   | 1.37E-10 | 0.004681 |
| 1Mar2011-  | 9389  | 1060.52 | -14.7014 | 1 _LVQDEN\ Splice@chr   | 3.43E-10 | 0.009096 |
| 1Mar2011-  | 7561  | 1060.52 | -14.7014 | 1 _LVQDEN\ Splice@chr   | 1.29E-10 | 0.002879 |
| 19July2011 | 5660  | 666.04  | -22.6992 | 3 K.IVISK+14. chr4@1146 | 1.09E-10 | 0.005444 |
| 1Mar2011-  | 15383 | 703.37  | -17.0862 | 2 R.ENYITGK chrX@9954   | 1.14E-10 | 0.002451 |
| 1Mar2011-  | 15593 | 936.52  | -7.79945 | 2 R.KEK+14.C chrX@9419  | 1.56E-10 | 0.003265 |
| 1Mar2011-  | 18452 | 1156.61 | 7.742003 | 2 K.FISQMIF chr1@3732   | 3.69E-10 | 0.008954 |
| 1Mar2011-  | 13912 | 697.13  | -5.59074 | 4 G.TFPRAKD Splice@chr  | 1.36E-11 | 5.64E-04 |
| 1Mar2011-  | 15375 | 697.13  | -5.59074 | 4 G.TFPRAKD Splice@chr  | 2.09E-11 | 8.07E-04 |
| 1Mar2011-  | 10774 | 952.01  | -18.9969 | 2 R.FWYNK+ chr4@1385    | 3.62E-10 | 0.008929 |
| 19July2011 | 1997  | 519.27  | -20.8054 | 3 R.NHLESISI chr2@7553  | 4.99E-10 | 0.008709 |
| 19July2011 | 10574 | 858.44  | 22.99285 | 2 K.MFPNK+ chr4@7466    | 1.20E-10 | 0.003115 |
| 19July2011 | 5095  | 592.33  | 21.31105 | 3 K.CARM+1 chr4@1045    | 7.62E-11 | 0.003436 |
| 19July2011 | 1959  | 517.26  | -28.295  | 3 K.VTVSMG Splice@chr   | 9.59E-11 | 0.002229 |
| 1Mar2011-  | 15099 | 538.53  | -10.787  | 4 _VLRPESS Splice@chr   | 2.13E-10 | 0.004048 |
| 1Mar2011-  | 10990 | 538.53  | -10.787  | 4 _VLRPESS Splice@chr   | 3.38E-10 | 0.009552 |
| 1Mar2011-  | 13061 | 538.53  | -10.787  | 4 _VLRPESS Splice@chr   | 4.81E-10 | 0.009976 |
| 1Mar2011-  | 12954 | 538.53  | -10.787  | 4 _VLRPESS Splice@chr   | 4.31E-10 | 0.00937  |
| 1Mar2011-  | 15459 | 538.53  | -10.787  | 4 _VLRPESS Splice@chr   | 3.27E-10 | 0.009454 |
| 19July2011 | 784   | 509.25  | 3.967026 | 3 _FCFFLHF chr5@9029    | 2.58E-10 | 0.007739 |
| 1Mar2011-  | 7210  | 1053.56 | 11.07999 | 3 K.MCKKCAI chr3@1217   | 3.43E-11 | 9.05E-04 |
| 19July2011 | 9955  | 973.52  | 24.51896 | 3 K.ISLMDRC chr2@3524   | 1.45E-10 | 0.003922 |

|            |       |         |          |                         |          |          |
|------------|-------|---------|----------|-------------------------|----------|----------|
| 1Mar2011-  | 7092  | 776.45  | -29.2006 | 2 K.KNFSVTG chr4@1595   | 2.21E-10 | 0.006531 |
| 19July2011 | 10070 | 797.4   | -21.2367 | 3 K.KDQNFGr chr4@1019   | 2.54E-10 | 0.005939 |
| 19July2011 | 558   | 510.61  | 9.422011 | 3 K.MPK+14. chr4@1592   | 1.31E-11 | 0.00114  |
| 19July2011 | 3362  | 449.59  | -18.4134 | 3 _ITECIIIIIV chr4@1050 | 6.25E-12 | 0        |
| 19July2011 | 6162  | 488.61  | -14.6537 | 3 K.PQFFVIW chrX@5110   | 2.85E-10 | 0.006892 |
| 1Mar2011-  | 209   | 420.72  | 12.72454 | 2 _RYTDTGK chr1@7224    | 3.29E-10 | 0.007573 |
| 1Mar2011-  | 153   | 420.72  | 12.72454 | 2 _RYTDTGK chr1@7224    | 3.40E-10 | 0.008299 |
| 1Mar2011-  | 10682 | 1098.54 | 11.82392 | 2 R.ERYKNW Splice@chr   | 3.94E-11 | 9.27E-04 |
| 1Mar2011-  | 9904  | 1098.54 | 11.82392 | 2 R.ERYKNW Splice@chr   | 8.76E-11 | 0.002646 |
| 1Mar2011-  | 636   | 572.38  | 13.03246 | 2 K.RRMKRIR chr1@4176   | 3.17E-10 | 0.008708 |
| 19July2011 | 5219  | 641.58  | -21.1358 | 4 R.LRRRLSDI Splice@chr | 5.06E-10 | 0.008887 |
| 1Mar2011-  | 13252 | 585.68  | -27.0716 | 3 R.LSRLGLKI chr2@3628  | 3.97E-11 | 0.001773 |
| 1Mar2011-  | 13305 | 585.68  | -27.0716 | 3 R.LSRLGLKI chr2@3628  | 7.14E-12 | 3.97E-04 |
| 19July2011 | 5451  | 547.79  | -1.11626 | 2 R.TVNYEVII Splice@chr | 7.65E-12 | 5.44E-04 |
| 19July2011 | 2941  | 547.79  | -1.11626 | 2 R.TVNYEVII Splice@chr | 1.01E-10 | 0.001913 |
| 19July2011 | 2879  | 547.79  | -1.11626 | 2 R.TVNYEVII chrX@1127  | 8.50E-11 | 0.001563 |
| 1Mar2011-  | 15642 | 1169.15 | -10.0319 | 2 _ILGIVFAK Splice@chr  | 2.33E-10 | 0.00631  |
| 1Mar2011-  | 13888 | 841.48  | -3.36521 | 3 R.QISKFEEL chr4@2562  | 5.46E-11 | 0.001007 |
| 1Mar2011-  | 17491 | 936.52  | 17.46319 | 2 _YIRK+14.1 chr3@2628  | 3.35E-10 | 0.007861 |
| 19July2011 | 2558  | 601.66  | -1.25275 | 3 K.EEEAK+1. chrX@1538  | 6.63E-11 | 0.002978 |
| 1Mar2011-  | 625   | 616.83  | -21.9032 | 2 I.QVNINIFV chr2@1351  | 1.29E-10 | 0.002651 |
| 19July2011 | 8712  | 659.87  | 12.3209  | 2 G.TFYVSIPI chr5@1968  | 4.54E-11 | 0.002473 |
| 19July2011 | 3513  | 614.84  | -12.3295 | 2 R.RNGLNEK Splice@chr  | 8.56E-11 | 0.001995 |
| 1Mar2011-  | 11013 | 737.4   | -22.2953 | 2 R.KVRQQG Splice@chr   | 1.20E-10 | 0.002926 |
| 1Mar2011-  | 2510  | 699.46  | 14.06939 | 2 K.FIKAK+14 chr4@1683  | 3.19E-10 | 0.008727 |
| 1Mar2011-  | 2710  | 699.46  | 14.06939 | 2 K.FIKAK+14 chr4@1683  | 2.18E-11 | 0.001059 |
| 1Mar2011-  | 17679 | 474.75  | -13.1411 | 4 K.FDPELLSI Splice@chr | 5.68E-11 | 9.74E-04 |
| 1Mar2011-  | 14625 | 474.75  | -13.1411 | 4 K.FDPELLSI Splice@chr | 2.93E-10 | 0.007366 |
| 1Mar2011-  | 18910 | 726.36  | -17.6918 | 1 _AAPSSHR chr2@1174    | 1.56E-10 | 0.004134 |
| 1Mar2011-  | 16435 | 587.55  | -23.3959 | 4 K.YLGAYLL Splice@chr  | 1.60E-10 | 0.003512 |
| 1Mar2011-  | 16428 | 1173.11 | -16.9559 | 2 K.YLGAYLL Splice@chr  | 1.25E-11 | 2.96E-04 |
| 1Mar2011-  | 16388 | 1173.11 | -16.9559 | 2 K.YLGAYLL Splice@chr  | 1.11E-11 | 2.96E-04 |
| 1Mar2011-  | 16470 | 1173.11 | -16.9559 | 2 K.YLGAYLL Splice@chr  | 4.48E-11 | 0.001216 |
| 1Mar2011-  | 16398 | 587.55  | -23.3959 | 4 K.YLGAYLL Splice@chr  | 2.53E-10 | 0.004782 |
| 1Mar2011-  | 17348 | 587.56  | -6.32324 | 4 K.YLGAYLL Splice@chr  | 3.29E-10 | 0.007983 |
| 1Mar2011-  | 17304 | 587.56  | -6.32324 | 4 K.YLGAYLL Splice@chr  | 3.72E-11 | 0.001145 |
| 1Mar2011-  | 17296 | 1173.12 | -8.41237 | 2 K.YLGAYLL Splice@chr  | 3.69E-11 | 0.001145 |
| 1Mar2011-  | 17384 | 1173.12 | -8.41237 | 2 K.YLGAYLL Splice@chr  | 2.03E-10 | 0.003829 |
| 1Mar2011-  | 17435 | 1173.12 | -8.41237 | 2 K.YLGAYLL Splice@chr  | 2.08E-10 | 0.003942 |
| 1Mar2011-  | 15321 | 587.56  | -6.32324 | 4 K.YLGAYLL Splice@chr  | 4.80E-11 | 0.001329 |
| 1Mar2011-  | 15303 | 1172.61 | -15.5242 | 2 K.YLGAYLL Splice@chr  | 1.30E-10 | 0.0039   |
| 1Mar2011-  | 15340 | 1172.61 | -15.5242 | 2 K.YLGAYLL Splice@chr  | 2.58E-11 | 6.11E-04 |
| 1Mar2011-  | 16438 | 1173.12 | -8.41237 | 2 K.YLGAYLL Splice@chr  | 3.81E-10 | 0.009263 |
| 1Mar2011-  | 16399 | 1173.12 | -8.41237 | 2 K.YLGAYLL Splice@chr  | 6.07E-11 | 9.74E-04 |
| 1Mar2011-  | 16368 | 1173.12 | -8.41237 | 2 K.YLGAYLL Splice@chr  | 8.18E-11 | 0.001639 |
| 1Mar2011-  | 16738 | 1173.11 | -16.9559 | 2 K.YLGAYLL Splice@chr  | 1.37E-11 | 3.00E-04 |
| 1Mar2011-  | 18125 | 1173.11 | -16.9559 | 2 K.YLGAYLL Splice@chr  | 2.35E-11 | 4.08E-04 |

|           |       |         |          |                         |          |          |
|-----------|-------|---------|----------|-------------------------|----------|----------|
| 1Mar2011- | 17759 | 1173.12 | -8.41237 | 2 K.YLGAYLL/ Splice@chr | 6.11E-11 | 0.001026 |
| 1Mar2011- | 17722 | 1173.12 | -8.41237 | 2 K.YLGAYLL/ Splice@chr | 5.65E-11 | 0.001026 |
| 1Mar2011- | 17724 | 587.56  | -6.32324 | 4 K.YLGAYLL/ Splice@chr | 1.57E-10 | 0.003499 |
| 1Mar2011- | 17681 | 1173.12 | -8.41237 | 2 K.YLGAYLL/ Splice@chr | 1.02E-10 | 0.002242 |
| 1Mar2011- | 16824 | 587.56  | -6.32324 | 4 K.YLGAYLL/ Splice@chr | 2.13E-11 | 4.29E-04 |
| 1Mar2011- | 16871 | 587.56  | -6.32324 | 4 K.YLGAYLL/ Splice@chr | 2.73E-10 | 0.006469 |
| 1Mar2011- | 16799 | 1173.12 | -8.41237 | 2 K.YLGAYLL/ Splice@chr | 1.55E-11 | 4.29E-04 |
| 1Mar2011- | 16299 | 587.3   | -21.9654 | 4 K.YLGAYLL/ Splice@chr | 1.75E-11 | 5.57E-04 |
| 1Mar2011- | 16745 | 1173.11 | -16.9559 | 2 K.YLGAYLL/ Splice@chr | 5.46E-11 | 0.001179 |
| 1Mar2011- | 16317 | 1173.11 | -16.9559 | 2 K.YLGAYLL/ Splice@chr | 7.87E-11 | 0.002182 |
| 1Mar2011- | 16357 | 1172.61 | -15.5242 | 2 K.YLGAYLL/ Splice@chr | 1.91E-10 | 0.004745 |
| 1Mar2011- | 16274 | 1173.11 | -16.9559 | 2 K.YLGAYLL/ Splice@chr | 5.25E-11 | 0.001179 |
| 1Mar2011- | 17899 | 1173.12 | -8.41237 | 2 K.YLGAYLL/ Splice@chr | 1.33E-11 | 5.63E-04 |
| 1Mar2011- | 17816 | 1173.12 | -8.41237 | 2 K.YLGAYLL/ Splice@chr | 5.34E-11 | 0.001415 |
| 1Mar2011- | 17953 | 1173.12 | -8.41237 | 2 K.YLGAYLL/ Splice@chr | 6.27E-11 | 0.001523 |
| 1Mar2011- | 17856 | 1173.11 | -16.9559 | 2 K.YLGAYLL/ Splice@chr | 7.95E-11 | 0.001642 |
| 1Mar2011- | 18554 | 1173.12 | -8.41237 | 2 K.YLGAYLL/ Splice@chr | 3.32E-10 | 0.007573 |
| 1Mar2011- | 19132 | 1173.12 | -8.41237 | 2 K.YLGAYLL/ Splice@chr | 1.58E-11 | 6.39E-04 |
| 1Mar2011- | 18690 | 1173.12 | -8.41237 | 2 K.YLGAYLL/ Splice@chr | 2.57E-10 | 0.006404 |
| 1Mar2011- | 18635 | 1173.12 | -8.41237 | 2 K.YLGAYLL/ Splice@chr | 6.56E-11 | 0.001872 |
| 1Mar2011- | 18585 | 587.56  | -6.32324 | 4 K.YLGAYLL/ Splice@chr | 1.09E-11 | 5.33E-04 |
| 1Mar2011- | 18746 | 1173.12 | -8.41237 | 2 K.YLGAYLL/ Splice@chr | 4.29E-11 | 0.001089 |
| 1Mar2011- | 18594 | 1173.12 | -8.41237 | 2 K.YLGAYLL/ Splice@chr | 6.81E-11 | 0.001872 |
| 1Mar2011- | 18756 | 1173.12 | -8.41237 | 2 K.YLGAYLL/ Splice@chr | 1.13E-10 | 0.004054 |
| 1Mar2011- | 18286 | 1173.12 | -8.41237 | 2 K.YLGAYLL/ Splice@chr | 2.02E-11 | 9.31E-04 |
| 1Mar2011- | 18234 | 1173.12 | -8.41237 | 2 K.YLGAYLL/ Splice@chr | 1.73E-11 | 8.04E-04 |
| 1Mar2011- | 18442 | 1173.12 | -8.41237 | 2 K.YLGAYLL/ Splice@chr | 3.83E-11 | 0.001656 |
| 1Mar2011- | 18341 | 1173.12 | -8.41237 | 2 K.YLGAYLL/ Splice@chr | 1.13E-10 | 0.004054 |
| 1Mar2011- | 18029 | 1173.12 | -8.41237 | 2 K.YLGAYLL/ Splice@chr | 5.07E-12 | 7.28E-04 |
| 1Mar2011- | 18181 | 1173.12 | -8.41237 | 2 K.YLGAYLL/ Splice@chr | 2.14E-11 | 9.31E-04 |
| 1Mar2011- | 17984 | 1173.12 | -8.41237 | 2 K.YLGAYLL/ Splice@chr | 5.35E-11 | 0.002382 |
| 1Mar2011- | 18131 | 1173.12 | -8.41237 | 2 K.YLGAYLL/ Splice@chr | 6.96E-12 | 8.04E-04 |
| 1Mar2011- | 19266 | 1173.12 | -8.41237 | 2 K.YLGAYLL/ Splice@chr | 2.53E-11 | 0.001167 |
| 1Mar2011- | 18399 | 1173.12 | -8.41237 | 2 K.YLGAYLL/ Splice@chr | 4.70E-11 | 0.001893 |
| 1Mar2011- | 18077 | 1173.12 | -8.41237 | 2 K.YLGAYLL/ Splice@chr | 3.76E-11 | 0.001536 |
| 1Mar2011- | 12935 | 1172.61 | -15.5242 | 2 K.YLGAYLL/ Splice@chr | 3.85E-11 | 0.001868 |
| 1Mar2011- | 12909 | 587.56  | -6.32324 | 4 K.YLGAYLL/ Splice@chr | 7.83E-11 | 0.002892 |
| 1Mar2011- | 12902 | 1172.61 | -15.5242 | 2 K.YLGAYLL/ Splice@chr | 1.86E-10 | 0.005619 |
| 1Mar2011- | 14488 | 587.56  | -6.32324 | 4 K.YLGAYLL/ Splice@chr | 3.78E-10 | 0.008183 |
| 1Mar2011- | 14447 | 587.56  | -6.32324 | 4 K.YLGAYLL/ Splice@chr | 4.16E-12 | 0        |
| 1Mar2011- | 15513 | 1173.12 | -8.41237 | 2 K.YLGAYLL/ Splice@chr | 1.32E-10 | 0.004866 |
| 1Mar2011- | 15480 | 587.56  | -6.32324 | 4 K.YLGAYLL/ Splice@chr | 2.23E-10 | 0.005668 |
| 1Mar2011- | 15443 | 587.56  | -6.32324 | 4 K.YLGAYLL/ Splice@chr | 7.02E-12 | 3.38E-04 |
| 1Mar2011- | 15827 | 1173.11 | -16.9559 | 2 K.YLGAYLL/ Splice@chr | 4.71E-10 | 0.009851 |
| 1Mar2011- | 15550 | 1173.12 | -8.41237 | 2 K.YLGAYLL/ Splice@chr | 4.76E-11 | 0.001652 |
| 1Mar2011- | 15432 | 1172.62 | -6.98068 | 2 K.YLGAYLL/ Splice@chr | 6.46E-11 | 0.001788 |
| 1Mar2011- | 16387 | 1173.12 | -8.41237 | 2 K.YLGAYLL/ Splice@chr | 6.63E-11 | 0.001979 |

|           |       |         |          |                         |          |          |
|-----------|-------|---------|----------|-------------------------|----------|----------|
| 1Mar2011- | 16392 | 587.56  | -6.32324 | 4 K.YLGAYLL/ Splice@chr | 1.44E-10 | 0.004567 |
| 1Mar2011- | 16344 | 1173.12 | -8.41237 | 2 K.YLGAYLL/ Splice@chr | 5.97E-11 | 0.001979 |
| 1Mar2011- | 16301 | 1173.12 | -8.41237 | 2 K.YLGAYLL/ Splice@chr | 1.21E-10 | 0.003677 |
| 1Mar2011- | 16305 | 587.56  | -6.32324 | 4 K.YLGAYLL/ Splice@chr | 2.73E-10 | 0.008362 |
| 1Mar2011- | 16347 | 587.56  | -6.32324 | 4 K.YLGAYLL/ Splice@chr | 3.03E-13 | 0        |
| 1Mar2011- | 14474 | 1172.62 | -6.98068 | 2 K.YLGAYLL/ Splice@chr | 2.13E-11 | 7.23E-04 |
| 1Mar2011- | 14404 | 1173.12 | -8.41237 | 2 K.YLGAYLL/ Splice@chr | 7.01E-11 | 0.002363 |
| 1Mar2011- | 14451 | 587.31  | -4.89276 | 4 K.YLGAYLL/ Splice@chr | 1.22E-10 | 0.003732 |
| 1Mar2011- | 14438 | 1173.12 | -8.41237 | 2 K.YLGAYLL/ Splice@chr | 3.18E-11 | 0.001061 |
| 1Mar2011- | 14957 | 1173.12 | -8.41237 | 2 K.YLGAYLL/ Splice@chr | 1.87E-10 | 0.005592 |
| 1Mar2011- | 14924 | 1173.12 | -8.41237 | 2 K.YLGAYLL/ Splice@chr | 1.12E-11 | 1.70E-04 |
| 1Mar2011- | 16580 | 1173.12 | -8.41237 | 2 K.YLGAYLL/ Splice@chr | 2.92E-11 | 5.82E-04 |
| 1Mar2011- | 16727 | 1173.11 | -16.9559 | 2 K.YLGAYLL/ Splice@chr | 2.44E-11 | 4.39E-04 |
| 1Mar2011- | 16303 | 1173.12 | -8.41237 | 2 K.YLGAYLL/ Splice@chr | 3.02E-11 | 5.82E-04 |
| 1Mar2011- | 16535 | 1173.13 | 0.131152 | 2 K.YLGAYLL/ Splice@chr | 6.36E-11 | 0.002084 |
| 1Mar2011- | 16625 | 1173.11 | -16.9559 | 2 K.YLGAYLL/ Splice@chr | 1.23E-11 | 4.39E-04 |
| 1Mar2011- | 16195 | 587.56  | -6.32324 | 4 K.YLGAYLL/ Splice@chr | 9.44E-11 | 0.003256 |
| 1Mar2011- | 16478 | 1173.12 | -8.41237 | 2 K.YLGAYLL/ Splice@chr | 2.55E-10 | 0.007595 |
| 1Mar2011- | 17089 | 1172.62 | -6.98068 | 2 K.YLGAYLL/ Splice@chr | 1.44E-10 | 0.004614 |
| 1Mar2011- | 17263 | 1173.12 | -8.41237 | 2 K.YLGAYLL/ Splice@chr | 1.18E-10 | 0.003739 |
| 1Mar2011- | 16254 | 1173.12 | -8.41237 | 2 K.YLGAYLL/ Splice@chr | 1.01E-10 | 0.003645 |
| 1Mar2011- | 16161 | 1173.12 | -8.41237 | 2 K.YLGAYLL/ Splice@chr | 7.65E-11 | 0.002616 |
| 1Mar2011- | 16771 | 1173.12 | -8.41237 | 2 K.YLGAYLL/ Splice@chr | 6.48E-11 | 0.002084 |
| 1Mar2011- | 16426 | 1173.12 | -8.41237 | 2 K.YLGAYLL/ Splice@chr | 4.85E-11 | 0.001413 |
| 1Mar2011- | 16670 | 1173.11 | -16.9559 | 2 K.YLGAYLL/ Splice@chr | 1.17E-10 | 0.003739 |
| 1Mar2011- | 16393 | 1173.13 | 0.131152 | 2 K.YLGAYLL/ Splice@chr | 4.00E-11 | 0.00114  |
| 1Mar2011- | 16351 | 1173.12 | -8.41237 | 2 K.YLGAYLL/ Splice@chr | 3.35E-11 | 0.001008 |
| 1Mar2011- | 16981 | 1173.11 | -16.9559 | 2 K.YLGAYLL/ Splice@chr | 2.71E-11 | 4.39E-04 |
| 1Mar2011- | 17350 | 1173.13 | 0.131152 | 2 K.YLGAYLL/ Splice@chr | 2.73E-10 | 0.008576 |
| 1Mar2011- | 16001 | 587.56  | -6.32324 | 4 K.YLGAYLL/ Splice@chr | 2.67E-10 | 0.007042 |
| 1Mar2011- | 15919 | 1173.12 | -8.41237 | 2 K.YLGAYLL/ Splice@chr | 1.22E-11 | 4.67E-04 |
| 1Mar2011- | 15948 | 587.56  | -6.32324 | 4 K.YLGAYLL/ Splice@chr | 5.21E-11 | 8.57E-04 |
| 1Mar2011- | 15913 | 587.56  | -6.32324 | 4 K.YLGAYLL/ Splice@chr | 7.84E-11 | 0.001252 |
| 1Mar2011- | 16646 | 1173.11 | -16.9559 | 2 K.YLGAYLL/ Splice@chr | 6.72E-11 | 0.001256 |
| 1Mar2011- | 16631 | 587.55  | -23.3959 | 4 K.YLGAYLL/ Splice@chr | 1.19E-10 | 0.00296  |
| 1Mar2011- | 16678 | 1173.11 | -16.9559 | 2 K.YLGAYLL/ Splice@chr | 1.27E-10 | 0.003078 |
| 1Mar2011- | 16602 | 1173.11 | -16.9559 | 2 K.YLGAYLL/ Splice@chr | 1.78E-10 | 0.003542 |
| 1Mar2011- | 15782 | 1172.62 | -6.98068 | 2 K.YLGAYLL/ Splice@chr | 1.26E-10 | 0.002981 |
| 1Mar2011- | 15873 | 587.56  | -6.32324 | 4 K.YLGAYLL/ Splice@chr | 2.92E-10 | 0.007185 |
| 1Mar2011- | 15794 | 587.56  | -6.32324 | 4 K.YLGAYLL/ Splice@chr | 4.48E-11 | 0.001418 |
| 1Mar2011- | 15857 | 1173.12 | -8.41237 | 2 K.YLGAYLL/ Splice@chr | 2.36E-10 | 0.005717 |
| 1Mar2011- | 15829 | 587.56  | -6.32324 | 4 K.YLGAYLL/ Splice@chr | 1.04E-11 | 3.22E-04 |
| 1Mar2011- | 15816 | 1173.12 | -8.41237 | 2 K.YLGAYLL/ Splice@chr | 1.13E-10 | 0.002451 |
| 1Mar2011- | 15129 | 587.56  | -6.32324 | 4 K.YLGAYLL/ Splice@chr | 3.30E-11 | 0.001427 |
| 1Mar2011- | 15165 | 587.56  | -6.32324 | 4 K.YLGAYLL/ Splice@chr | 2.80E-12 | 0        |
| 1Mar2011- | 14481 | 587.56  | -6.32324 | 4 K.YLGAYLL/ Splice@chr | 2.24E-11 | 5.76E-04 |
| 1Mar2011- | 14448 | 587.56  | -6.32324 | 4 K.YLGAYLL/ Splice@chr | 5.23E-11 | 0.00165  |

|           |       |         |          |                         |          |          |
|-----------|-------|---------|----------|-------------------------|----------|----------|
| 1Mar2011- | 14410 | 587.56  | -6.32324 | 4 K.YLGAYLL/ Splice@chr | 7.74E-11 | 0.002312 |
| 1Mar2011- | 17036 | 1173.12 | -8.41237 | 2 K.YLGAYLL/ Splice@chr | 6.03E-11 | 0.001732 |
| 1Mar2011- | 16993 | 1173.12 | -8.41237 | 2 K.YLGAYLL/ Splice@chr | 7.45E-11 | 0.002182 |
| 1Mar2011- | 16995 | 587.56  | -6.32324 | 4 K.YLGAYLL/ Splice@chr | 2.17E-11 | 5.23E-04 |
| 1Mar2011- | 16953 | 1173.12 | -8.41237 | 2 K.YLGAYLL/ Splice@chr | 5.35E-11 | 0.001496 |
| 1Mar2011- | 17418 | 1173.11 | -16.9559 | 2 K.YLGAYLL/ Splice@chr | 4.15E-10 | 0.009418 |
| 1Mar2011- | 17082 | 1173.12 | -8.41237 | 2 K.YLGAYLL/ Splice@chr | 1.01E-10 | 0.002623 |
| 1Mar2011- | 17252 | 1172.62 | -6.98068 | 2 K.YLGAYLL/ Splice@chr | 2.87E-10 | 0.007045 |
| 1Mar2011- | 17129 | 1173.11 | -16.9559 | 2 K.YLGAYLL/ Splice@chr | 3.89E-11 | 0.001053 |
| 1Mar2011- | 17153 | 587.55  | -23.3959 | 4 K.YLGAYLL/ Splice@chr | 1.38E-10 | 0.00356  |
| 1Mar2011- | 17169 | 1173.11 | -16.9559 | 2 K.YLGAYLL/ Splice@chr | 2.35E-10 | 0.005925 |
| 1Mar2011- | 17628 | 587.56  | -6.32324 | 4 K.YLGAYLL/ Splice@chr | 1.18E-11 | 8.96E-04 |
| 1Mar2011- | 17685 | 1173.12 | -8.41237 | 2 K.YLGAYLL/ Splice@chr | 1.94E-10 | 0.005323 |
| 1Mar2011- | 17605 | 1173.12 | -8.41237 | 2 K.YLGAYLL/ Splice@chr | 1.90E-11 | 0.001162 |
| 1Mar2011- | 17672 | 587.56  | -6.32324 | 4 K.YLGAYLL/ Splice@chr | 5.63E-12 | 1.59E-04 |
| 1Mar2011- | 15651 | 1173.11 | -16.9559 | 2 K.YLGAYLL/ Splice@chr | 4.66E-10 | 0.009846 |
| 1Mar2011- | 15616 | 1173.12 | -8.41237 | 2 K.YLGAYLL/ Splice@chr | 1.65E-11 | 1.52E-04 |
| 1Mar2011- | 15688 | 1173.12 | -8.41237 | 2 K.YLGAYLL/ Splice@chr | 2.56E-10 | 0.006118 |
| 1Mar2011- | 16857 | 1173.12 | -8.41237 | 2 K.YLGAYLL/ Splice@chr | 6.17E-11 | 0.002062 |
| 1Mar2011- | 16817 | 1173.12 | -8.41237 | 2 K.YLGAYLL/ Splice@chr | 2.20E-10 | 0.006603 |
| 1Mar2011- | 16836 | 587.31  | -4.89276 | 4 K.YLGAYLL/ Splice@chr | 3.29E-10 | 0.009174 |
| 1Mar2011- | 14830 | 587.56  | -6.32324 | 4 K.YLGAYLL/ Splice@chr | 4.57E-11 | 0.001773 |
| 1Mar2011- | 14577 | 1173.12 | -8.41237 | 2 K.YLGAYLL/ Splice@chr | 2.33E-10 | 0.007134 |
| 1Mar2011- | 14553 | 1173.14 | 8.674676 | 2 K.YLGAYLL/ Splice@chr | 2.44E-10 | 0.007566 |
| 1Mar2011- | 15642 | 587.56  | -6.32324 | 4 K.YLGAYLL/ Splice@chr | 4.99E-11 | 0.001757 |
| 1Mar2011- | 15689 | 587.56  | -6.32324 | 4 K.YLGAYLL/ Splice@chr | 4.54E-11 | 0.001757 |
| 1Mar2011- | 17366 | 1173.12 | -8.41237 | 2 K.YLGAYLL/ Splice@chr | 1.54E-10 | 0.003274 |
| 1Mar2011- | 17404 | 1173.12 | -8.41237 | 2 K.YLGAYLL/ Splice@chr | 8.45E-11 | 0.002368 |
| 1Mar2011- | 17861 | 1173.12 | -8.41237 | 2 K.YLGAYLL/ Splice@chr | 3.39E-10 | 0.007861 |
| 1Mar2011- | 17893 | 1173.12 | -8.41237 | 2 K.YLGAYLL/ Splice@chr | 1.30E-11 | 9.49E-04 |
| 1Mar2011- | 17933 | 1173.12 | -8.41237 | 2 K.YLGAYLL/ Splice@chr | 1.16E-10 | 0.002665 |
| 1Mar2011- | 16574 | 1173.11 | -16.9559 | 2 K.YLGAYLL/ Splice@chr | 2.76E-11 | 8.54E-04 |
| 1Mar2011- | 16163 | 1173.12 | -8.41237 | 2 K.YLGAYLL/ Splice@chr | 1.85E-10 | 0.005482 |
| 1Mar2011- | 16087 | 1173.12 | -8.41237 | 2 K.YLGAYLL/ Splice@chr | 4.49E-11 | 0.001342 |
| 1Mar2011- | 16204 | 1172.62 | -6.98068 | 2 K.YLGAYLL/ Splice@chr | 6.28E-12 | 1.84E-04 |
| 1Mar2011- | 16151 | 587.56  | -6.32324 | 4 K.YLGAYLL/ Splice@chr | 3.36E-11 | 8.54E-04 |
| 1Mar2011- | 16127 | 1173.12 | -8.41237 | 2 K.YLGAYLL/ Splice@chr | 3.43E-11 | 8.54E-04 |
| 1Mar2011- | 16114 | 587.56  | -6.32324 | 4 K.YLGAYLL/ Splice@chr | 1.08E-10 | 0.003475 |
| 1Mar2011- | 17409 | 1173.12 | -8.41237 | 2 K.YLGAYLL/ Splice@chr | 1.21E-11 | 9.26E-04 |
| 1Mar2011- | 17057 | 1173.12 | -8.41237 | 2 K.YLGAYLL/ Splice@chr | 6.87E-11 | 0.003375 |
| 1Mar2011- | 17096 | 587.56  | -6.32324 | 4 K.YLGAYLL/ Splice@chr | 1.39E-10 | 0.005522 |
| 1Mar2011- | 17098 | 1173.12 | -8.41237 | 2 K.YLGAYLL/ Splice@chr | 1.51E-11 | 9.26E-04 |
| 1Mar2011- | 14565 | 1173.11 | -16.9559 | 2 K.YLGAYLL/ Splice@chr | 3.13E-11 | 1.56E-04 |
| 1Mar2011- | 14601 | 1173.11 | -16.9559 | 2 K.YLGAYLL/ Splice@chr | 7.73E-11 | 0.001187 |
| 1Mar2011- | 14589 | 587.3   | -21.9654 | 4 K.YLGAYLL/ Splice@chr | 7.60E-11 | 0.001187 |
| 1Mar2011- | 15176 | 1173.12 | -8.41237 | 2 K.YLGAYLL/ Splice@chr | 6.48E-11 | 0.002128 |
| 1Mar2011- | 15137 | 1173.12 | -8.41237 | 2 K.YLGAYLL/ Splice@chr | 9.34E-11 | 0.003293 |

|            |       |         |          |                         |          |          |
|------------|-------|---------|----------|-------------------------|----------|----------|
| 1Mar2011-  | 15094 | 1173.12 | -8.41237 | 2 K.YLGAYLL/ Splice@chr | 2.92E-11 | 9.66E-04 |
| 1Mar2011-  | 15211 | 1173.13 | 0.131152 | 2 K.YLGAYLL/ Splice@chr | 6.10E-11 | 0.002006 |
| 1Mar2011-  | 15060 | 1173.13 | 0.131152 | 2 K.YLGAYLL/ Splice@chr | 1.42E-10 | 0.004958 |
| 1Mar2011-  | 15105 | 1173.12 | -8.41237 | 2 K.YLGAYLL/ Splice@chr | 4.07E-11 | 0.001357 |
| 1Mar2011-  | 15137 | 587.56  | -6.32324 | 4 K.YLGAYLL/ Splice@chr | 7.98E-11 | 0.001905 |
| 1Mar2011-  | 15134 | 1173.12 | -8.41237 | 2 K.YLGAYLL/ Splice@chr | 1.32E-11 | 9.29E-04 |
| 1Mar2011-  | 15173 | 1173.12 | -8.41237 | 2 K.YLGAYLL/ Splice@chr | 4.83E-11 | 0.001357 |
| 1Mar2011-  | 14793 | 587.56  | -6.32324 | 4 K.YLGAYLL/ Splice@chr | 7.18E-11 | 0.001839 |
| 1Mar2011-  | 14755 | 587.56  | -6.32324 | 4 K.YLGAYLL/ Splice@chr | 2.08E-10 | 0.005716 |
| 1Mar2011-  | 14831 | 587.56  | -6.32324 | 4 K.YLGAYLL/ Splice@chr | 1.45E-10 | 0.004432 |
| 1Mar2011-  | 13487 | 1173.12 | -8.41237 | 2 K.YLGAYLL/ Splice@chr | 4.63E-11 | 0.001166 |
| 1Mar2011-  | 13525 | 1173.12 | -8.41237 | 2 K.YLGAYLL/ Splice@chr | 1.64E-10 | 0.004022 |
| 1Mar2011-  | 14457 | 1173.12 | -8.41237 | 2 K.YLGAYLL/ Splice@chr | 2.65E-11 | 9.83E-04 |
| 1Mar2011-  | 14486 | 1173.12 | -8.41237 | 2 K.YLGAYLL/ Splice@chr | 6.34E-11 | 0.001239 |
| 1Mar2011-  | 13882 | 587.56  | -6.32324 | 4 K.YLGAYLL/ Splice@chr | 1.38E-10 | 0.005157 |
| 1Mar2011-  | 13922 | 587.56  | -6.32324 | 4 K.YLGAYLL/ Splice@chr | 5.13E-11 | 0.001321 |
| 1Mar2011-  | 13593 | 1173.12 | -8.41237 | 2 K.YLGAYLL/ Splice@chr | 2.81E-10 | 0.008964 |
| 1Mar2011-  | 13620 | 587.56  | -6.32324 | 4 K.YLGAYLL/ Splice@chr | 1.39E-11 | 9.56E-04 |
| 1Mar2011-  | 13581 | 587.56  | -6.32324 | 4 K.YLGAYLL/ Splice@chr | 2.21E-10 | 0.007324 |
| 1Mar2011-  | 15292 | 587.56  | -6.32324 | 4 K.YLGAYLL/ Splice@chr | 1.27E-10 | 0.003092 |
| 1Mar2011-  | 15305 | 1173.12 | -8.41237 | 2 K.YLGAYLL/ Splice@chr | 9.04E-11 | 0.002067 |
| 1Mar2011-  | 15344 | 1173.12 | -8.41237 | 2 K.YLGAYLL/ Splice@chr | 9.53E-11 | 0.002067 |
| 1Mar2011-  | 15268 | 1173.12 | -8.41237 | 2 K.YLGAYLL/ Splice@chr | 1.34E-10 | 0.003092 |
| 1Mar2011-  | 14246 | 747.4   | -1.59422 | 2 V.EK+14.01 Splice@chr | 3.96E-12 | 0        |
| 1Mar2011-  | 16594 | 747.41  | 11.74382 | 2 V.EK+14.01 Splice@chr | 1.25E-11 | 8.04E-04 |
| 1Mar2011-  | 12066 | 747.4   | -1.59422 | 2 V.EK+14.01 Splice@chr | 1.24E-11 | 8.14E-04 |
| 1Mar2011-  | 15092 | 746.9   | 0.654628 | 2 V.EK+14.01 chrX@670   | 5.90E-11 | 0.002084 |
| 1Mar2011-  | 15145 | 746.9   | 0.654628 | 2 V.EK+14.01 Splice@chr | 4.61E-11 | 0.001278 |
| 1Mar2011-  | 15741 | 746.9   | 0.654628 | 2 V.EK+14.01 Splice@chr | 7.74E-11 | 0.001382 |
| 1Mar2011-  | 14555 | 747.41  | 11.74382 | 2 V.EK+14.01 Splice@chr | 1.51E-10 | 0.003331 |
| 1Mar2011-  | 16051 | 747.4   | -1.59422 | 2 V.EK+14.01 Splice@chr | 1.45E-11 | 2.80E-04 |
| 1Mar2011-  | 15939 | 746.9   | 0.654628 | 2 V.EK+14.01 Splice@chr | 5.39E-12 | 0        |
| 1Mar2011-  | 16392 | 746.9   | 0.654628 | 2 V.EK+14.01 Splice@chr | 9.32E-12 | 4.60E-04 |
| 1Mar2011-  | 14561 | 746.91  | 13.99266 | 2 V.EK+14.01 Splice@chr | 2.61E-10 | 0.006344 |
| 1Mar2011-  | 14945 | 746.9   | 0.654628 | 2 V.EK+14.01 Splice@chr | 2.73E-11 | 8.54E-04 |
| 1Mar2011-  | 15814 | 746.9   | 0.654628 | 2 V.EK+14.01 Splice@chr | 3.52E-11 | 0.001617 |
| 1Mar2011-  | 735   | 478.28  | -9.91086 | 2 K.FKYGITV/ Splice@chr | 3.05E-10 | 0.007625 |
| 1Mar2011-  | 5623  | 641.4   | -5.19671 | 2 K.KNWLIVR chr5@183    | 3.25E-10 | 0.007648 |
| 1Mar2011-  | 4919  | 641.4   | -5.19671 | 2 K.KNWLIVR chr5@183    | 1.15E-10 | 0.004373 |
| 19July2011 | 9689  | 708.38  | -15.761  | 3 K.GRKRPIG chr1@117    | 1.73E-10 | 0.004786 |
| 19July2011 | 7410  | 726.63  | -9.16837 | 4 K.VRLTSRR chr4@125    | 2.99E-11 | 7.76E-04 |
| 1Mar2011-  | 14745 | 634.81  | -12.2861 | 2 R.DTYAMIS chr1@676    | 3.26E-10 | 0.007875 |
| 1Mar2011-  | 15040 | 634.81  | -12.2861 | 2 R.DTYAMIS chr1@676    | 4.61E-10 | 0.009842 |
| 1Mar2011-  | 14134 | 466.9   | 2.707486 | 3 R.SSFSVYR\ Splice@chr | 2.15E-10 | 0.00523  |
| 19July2011 | 2144  | 559.61  | -23.819  | 3 K.K+14.016 chr5@122   | 2.68E-10 | 0.006989 |
| 19July2011 | 11413 | 805.78  | -28.5013 | 3 K.FCLQKQK chrX@440    | 3.86E-10 | 0.006938 |
| 1Mar2011-  | 10919 | 506.95  | -9.05224 | 3 R.K+14.016 Splice@chr | 7.35E-11 | 0.001445 |

|            |       |         |          |                          |          |          |
|------------|-------|---------|----------|--------------------------|----------|----------|
| 1Mar2011-  | 11609 | 471.75  | -24.8288 | 2 K.MLICVLPI chr3@8579   | 3.79E-10 | 0.009457 |
| 19July2011 | 779   | 448.26  | 16.9436  | 2 _..IYVSGVEI chr3@2199  | 4.78E-10 | 0.008346 |
| 1Mar2011-  | 6518  | 636.86  | 22.07808 | 2 L.FNLSTSIS' Splice@chr | 1.63E-10 | 0.003703 |
| 19July2011 | 9439  | 1044.88 | -28.8443 | 3 K.FNAIVLKI Splice@chr  | 3.19E-10 | 0.007933 |
| 1Mar2011-  | 15237 | 1175.1  | -25.0399 | 2 _..KQLFQQS chr3@8409   | 3.20E-10 | 0.006921 |
| 1Mar2011-  | 11195 | 737.91  | 18.96767 | 2 R.SLLNCVG chrX@7932    | 4.04E-10 | 0.008892 |
| 19July2011 | 330   | 555.77  | 9.131776 | 2 R.EYDKWN chr5@4014     | 1.65E-11 | 5.50E-04 |
| 19July2011 | 3439  | 493.26  | -3.26587 | 3 _..ITVDTGD chr2@3279   | 3.62E-13 | 0        |
| 1Mar2011-  | 2190  | 496.29  | 14.66495 | 2 K.FDNQKIV chrX@6408    | 3.40E-10 | 0.008077 |
| 1Mar2011-  | 2344  | 496.29  | 14.66495 | 2 K.FDNQKIV chrX@6408    | 2.31E-10 | 0.004964 |
| 1Mar2011-  | 2294  | 496.28  | -5.54557 | 2 K.FDNQKIV chrX@6408    | 2.49E-10 | 0.005173 |
| 1Mar2011-  | 2251  | 496.29  | 14.66495 | 2 K.FDNQKIV chrX@6408    | 2.73E-10 | 0.006469 |
| 1Mar2011-  | 2865  | 496.28  | -5.54557 | 2 K.FDNQKIV chrX@6408    | 4.27E-10 | 0.00988  |
| 1Mar2011-  | 1638  | 496.29  | 14.66495 | 2 K.FDNQKIV chrX@6408    | 1.88E-10 | 0.006594 |
| 1Mar2011-  | 2064  | 496.28  | -5.54557 | 2 K.FDNQKIV chrX@6408    | 2.55E-10 | 0.007595 |
| 1Mar2011-  | 2427  | 496.28  | -5.54557 | 2 K.FDNQKIV chrX@6408    | 2.39E-10 | 0.006089 |
| 1Mar2011-  | 13818 | 696.35  | -18.6084 | 2 K.KTFFSGK- chr3@1256   | 1.76E-10 | 0.005086 |
| 1Mar2011-  | 11915 | 696.35  | -18.6084 | 2 K.KTFFSGK- chr3@1256   | 1.33E-10 | 0.003846 |
| 1Mar2011-  | 10203 | 696.35  | -18.6084 | 2 K.KTFFSGK- chr3@1256   | 2.82E-10 | 0.008964 |
| 1Mar2011-  | 15139 | 762.13  | -4.55161 | 4 K.SGDAGIV Splice@chr   | 3.68E-10 | 0.009338 |
| 19July2011 | 12603 | 815.45  | 11.88694 | 2 R.SWDM+1 Splice@chr    | 3.17E-10 | 0.009085 |
| 19July2011 | 8608  | 587.53  | -20.2918 | 4 K.GK+14.01 chr3@4347   | 4.07E-11 | 0.001851 |
| 19July2011 | 119   | 414.55  | -0.68876 | 3 K.NTEQVAc chrX@4427    | 2.83E-10 | 0.005364 |
| 1Mar2011-  | 31    | 554.25  | -0.88258 | 2 Q.DHTNHN Splice@chr    | 1.81E-11 | 6.10E-04 |
| 1Mar2011-  | 31    | 554.25  | -0.88258 | 2 Q.DHTNHN Splice@chr    | 4.76E-11 | 7.16E-04 |
| 1Mar2011-  | 55    | 554.25  | -0.88258 | 2 Q.DHTNHN Splice@chr    | 9.64E-12 | 3.22E-04 |
| 1Mar2011-  | 66    | 554.25  | -0.88258 | 2 Q.DHTNHN Splice@chr    | 2.40E-12 | 0        |
| 1Mar2011-  | 8410  | 585.99  | 6.160653 | 3 Y.LLATLGGI Splice@chr  | 7.46E-12 | 0        |
| 1Mar2011-  | 1796  | 487.28  | -13.8066 | 2 _..IKMGFHL chrX@1248   | 1.16E-10 | 0.003717 |
| 1Mar2011-  | 12571 | 652.4   | -0.1874  | 2 K.KKCAKFP chr5@1816    | 3.85E-10 | 0.009686 |
| 1Mar2011-  | 15251 | 987.84  | -24.2313 | 3 R.FRTDFLL\ chr5@1369   | 3.84E-10 | 0.007773 |
| 1Mar2011-  | 19774 | 1060.55 | -2.85179 | 2 K.K+14.016 chr5@1966   | 1.17E-10 | 0.002665 |
| 1Mar2011-  | 17954 | 644.4   | -15.5206 | 2 R.KIDILSIFP chrX@1121  | 4.13E-10 | 0.00969  |
| 1Mar2011-  | 6090  | 422.74  | -20.1887 | 2 R.LLGTVAD chrX@4451    | 2.91E-11 | 0.001156 |
| 1Mar2011-  | 19943 | 847.41  | 21.41752 | 2 K.RSWM+1 chrX@1646     | 6.00E-11 | 0.002983 |
| 1Mar2011-  | 15552 | 623.84  | -19.3853 | 4 K.IVQKSLRI chr2@2647   | 1.62E-10 | 0.00358  |
| 1Mar2011-  | 6168  | 555.97  | -4.73071 | 3 K.RHNLAk\ chr1@1079    | 4.74E-11 | 0.001448 |
| 1Mar2011-  | 14996 | 938.04  | -16.0234 | 2 K.RFRMRG. chr5@9258    | 3.06E-10 | 0.009441 |
| 1Mar2011-  | 6203  | 732.92  | -22.4318 | 2 K.KISGRK+1 chr1@6697   | 6.39E-11 | 0.00193  |
| 1Mar2011-  | 5379  | 732.92  | -22.4318 | 2 K.KISGRK+1 chr1@6697   | 4.20E-10 | 0.008851 |
| 19July2011 | 8523  | 509.61  | 9.360531 | 3 K.SHILCLPS chrX@1469   | 1.27E-10 | 0.003462 |
| 1Mar2011-  | 4017  | 478.23  | 14.70834 | 2 K.MLGYSF chr2@1349     | 2.52E-10 | 0.007384 |
| 1Mar2011-  | 2027  | 525.32  | -21.9618 | 2 K.KKFGSLIC chr5@3826   | 2.76E-10 | 0.006801 |
| 1Mar2011-  | 2048  | 403.2   | 4.561063 | 2 K.DDIAASG chr3@1101    | 1.21E-10 | 0.003732 |
| 1Mar2011-  | 1690  | 403.2   | 4.561063 | 2 K.DDIAASG chr3@1101    | 2.55E-10 | 0.005123 |
| 1Mar2011-  | 3001  | 403.2   | 4.561063 | 2 K.DDIAASG chr3@1101    | 5.26E-11 | 0.002163 |
| 1Mar2011-  | 1879  | 403.2   | 4.561063 | 2 K.DDIAASG chr3@1101    | 8.57E-11 | 0.003714 |

|            |       |         |          |                         |          |          |
|------------|-------|---------|----------|-------------------------|----------|----------|
| 1Mar2011-  | 2249  | 403.2   | 4.561063 | 2 K.DDIAASG chr3@1101   | 2.29E-10 | 0.00684  |
| 1Mar2011-  | 2531  | 403.2   | 4.561063 | 2 K.DDIAASG chr3@1101   | 5.09E-10 | 0.009921 |
| 1Mar2011-  | 2587  | 403.2   | 4.561063 | 2 K.DDIAASG chr3@1101   | 4.98E-10 | 0.009543 |
| 1Mar2011-  | 2133  | 403.2   | 4.561063 | 2 K.DDIAASG chr3@1101   | 2.90E-10 | 0.008744 |
| 1Mar2011-  | 2181  | 403.2   | 4.561063 | 2 K.DDIAASG chr3@1101   | 6.03E-11 | 0.001185 |
| 1Mar2011-  | 2230  | 403.2   | 4.561063 | 2 K.DDIAASG chr3@1101   | 1.75E-10 | 0.004995 |
| 1Mar2011-  | 2276  | 403.2   | 4.561063 | 2 K.DDIAASG chr3@1101   | 3.31E-11 | 5.22E-04 |
| 1Mar2011-  | 5801  | 654.34  | 11.62256 | 3 R.NENQSCf chr4@5370   | 2.42E-10 | 0.004825 |
| 1Mar2011-  | 5875  | 654.34  | 11.62256 | 3 R.NENQSCf chr4@5370   | 2.45E-10 | 0.005061 |
| 1Mar2011-  | 840   | 478.28  | -17.4558 | 2 _KNNKNPI chrX@6890    | 2.15E-10 | 0.005778 |
| 19July2011 | 9476  | 523.8   | 27.43663 | 2 K.IGLSGTN\ chr4@3574  | 3.68E-10 | 0.008242 |
| 19July2011 | 7463  | 741.9   | -17.6291 | 2 R.KRM+15. chr4@5225   | 2.69E-10 | 0.005893 |
| 1Mar2011-  | 4786  | 474.78  | 23.31842 | 2 _VLVKSCSI chr3@7042   | 2.14E-10 | 0.005409 |
| 1Mar2011-  | 3647  | 474.78  | 23.31842 | 2 _VLVKSCSI chr3@7042   | 1.63E-10 | 0.005728 |
| 1Mar2011-  | 4606  | 474.78  | 23.31842 | 2 _VLVKSCSI chr3@7042   | 1.68E-10 | 0.002899 |
| 1Mar2011-  | 4535  | 474.78  | 23.31842 | 2 _VLVKSCSI chr3@7042   | 3.36E-10 | 0.006458 |
| 1Mar2011-  | 3867  | 474.78  | 23.31842 | 2 _VLVKSCSI chr3@7042   | 3.01E-10 | 0.009694 |
| 1Mar2011-  | 4754  | 816.92  | 3.366283 | 2 K.QVVSSIG chr2@1865   | 5.08E-20 | 0        |
| 1Mar2011-  | 4699  | 816.92  | 3.366283 | 2 K.QVVSSIG chr2@1865   | 5.08E-20 | 0        |
| 1Mar2011-  | 4649  | 816.92  | 3.366283 | 2 K.QVVSSIG chr2@1865   | 2.05E-19 | 0        |
| 1Mar2011-  | 5676  | 816.92  | 3.366283 | 2 K.QVVSSIG chr2@1865   | 5.08E-20 | 0        |
| 1Mar2011-  | 5743  | 816.92  | 3.366283 | 2 K.QVVSSIG chr2@1865   | 1.03E-19 | 0        |
| 1Mar2011-  | 5623  | 816.92  | 3.366283 | 2 K.QVVSSIG chr2@1865   | 4.10E-19 | 0        |
| 1Mar2011-  | 4225  | 816.92  | 3.366283 | 2 K.QVVSSIG chr2@1865   | 1.03E-19 | 0        |
| 1Mar2011-  | 4177  | 816.92  | 3.366283 | 2 K.QVVSSIG chr2@1865   | 1.02E-19 | 0        |
| 1Mar2011-  | 5123  | 816.92  | 3.366283 | 2 K.QVVSSIG chr2@1865   | 5.08E-20 | 0        |
| 1Mar2011-  | 5172  | 816.92  | 3.366283 | 2 K.QVVSSIG chr2@1865   | 1.02E-19 | 0        |
| 1Mar2011-  | 5228  | 816.92  | 3.366283 | 2 K.QVVSSIG chr2@1865   | 1.02E-19 | 0        |
| 19July2011 | 6347  | 432.89  | -15.2257 | 3 R.KSKASHH chr2@9842   | 9.35E-11 | 0.00682  |
| 19July2011 | 1280  | 411.55  | -26.8589 | 3 K.ALQM+1\ chr3@1125   | 2.97E-10 | 0.007757 |
| 1Mar2011-  | 18747 | 936.52  | 15.30896 | 2 R.RVNLFKE chr2@1152   | 8.65E-11 | 0.003644 |
| 1Mar2011-  | 9480  | 924.45  | -12.2275 | 1 _NFSNIGM chr3@1301    | 1.58E-10 | 0.00478  |
| 1Mar2011-  | 12088 | 546.96  | -8.86905 | 3 _SLNNEFIF chr4@9158   | 4.05E-10 | 0.009566 |
| 1Mar2011-  | 430   | 525.32  | 23.51536 | 2 K.KKMISMI chr5@1839   | 3.55E-10 | 0.008739 |
| 19July2011 | 10956 | 949.49  | 17.3749  | 2 K.SQFLQTF chr2@1169   | 1.46E-10 | 0.004568 |
| 1Mar2011-  | 11267 | 456.74  | 26.51839 | 2 A.HSAHWF chr2@1372    | 5.63E-10 | 0.009682 |
| 19July2011 | 4242  | 705.69  | -27.0057 | 3 K.NSVQYLS chr5@3315   | 3.94E-12 | 0        |
| 19July2011 | 7307  | 614.84  | -7.3125  | 2 _IFFEIGIFN chr3@8720  | 1.66E-10 | 0.004908 |
| 19July2011 | 8116  | 908.45  | 2.983786 | 3 I.TSDGMYSR Splice@chr | 4.42E-10 | 0.007836 |
| 1Mar2011-  | 9232  | 748.87  | 5.817617 | 4 R.NKYCCCS chrX@8699   | 1.76E-10 | 0.005054 |
| 1Mar2011-  | 8405  | 555.29  | -9.31118 | 2 _FQAALNY Splice@chr   | 2.11E-10 | 0.00586  |
| 1Mar2011-  | 11732 | 869.98  | 17.81726 | 2 A.M+15.99 chr1@9709   | 1.05E-10 | 0.002345 |
| 19July2011 | 8241  | 663.38  | 18.65512 | 3 R.YLRETLQI chr3@2679  | 8.26E-11 | 0.002125 |
| 1Mar2011-  | 10343 | 521.58  | -13.2096 | 3 _DNLVVDI Splice@chr   | 4.34E-10 | 0.009763 |
| 1Mar2011-  | 3188  | 483.79  | -21.575  | 2 K.KGGVGP\ chr3@1148   | 2.12E-10 | 0.005092 |
| 1Mar2011-  | 20615 | 1182.57 | -24.5189 | 3 R.KRKKRQS chr1@1398   | 2.86E-11 | 0.001538 |
| 1Mar2011-  | 12263 | 948.43  | -13.9535 | 2 K.K+14.016 chr4@6784  | 1.10E-10 | 0.002852 |

|            |       |        |          |                         |          |          |
|------------|-------|--------|----------|-------------------------|----------|----------|
| 1Mar2011-  | 11427 | 948.44 | -3.38278 | 2 K.K+14.016 chr4@6784  | 1.90E-10 | 0.005482 |
| 1Mar2011-  | 10061 | 842.41 | -5.47872 | 2 S.YIFTFRNS chr1@1441  | 2.67E-10 | 0.007176 |
| 1Mar2011-  | 15179 | 893.03 | -10.5371 | 2 K.EDSRQIK- chr5@5701  | 4.41E-10 | 0.009912 |
| 19July2011 | 1521  | 504.77 | -23.5042 | 2 R.PFLYFPPK chr2@2877  | 4.67E-10 | 0.008883 |
| 1Mar2011-  | 13118 | 722.91 | 28.81082 | 2 R.MIIDTFHI chr2@1749  | 2.02E-10 | 0.004748 |
| 19July2011 | 10500 | 567.31 | -16.3102 | 3 K.IDLLDRFL chr4@7696  | 2.31E-10 | 0.004852 |
| 1Mar2011-  | 5774  | 686.38 | -13.6251 | 2 K.ILNSNSN! chr1@2706  | 2.85E-10 | 0.008615 |
| 1Mar2011-  | 7567  | 401.73 | 7.38723  | 2 R.WALGVE chr5@3693    | 4.22E-10 | 0.009548 |
| 1Mar2011-  | 7672  | 401.73 | 7.38723  | 2 R.WALGVE chr5@3693    | 4.38E-10 | 0.009812 |
| 1Mar2011-  | 6307  | 401.73 | 7.38723  | 2 R.WALGVE chr5@3693    | 1.50E-10 | 0.00288  |
| 1Mar2011-  | 8190  | 401.73 | 7.38723  | 2 R.WALGVE chr5@3693    | 3.71E-10 | 0.009272 |
| 1Mar2011-  | 8558  | 401.73 | 7.38723  | 2 R.WALGVE chr5@3693    | 2.64E-10 | 0.006472 |
| 1Mar2011-  | 7821  | 401.73 | 7.38723  | 2 R.WALGVE chr5@3693    | 1.56E-10 | 0.005742 |
| 1Mar2011-  | 15517 | 808.42 | -20.4602 | 3 _K+14.016 chr4@1911   | 3.12E-10 | 0.009574 |
| 1Mar2011-  | 15120 | 859.45 | 11.8957  | 4 R.FPK+14.0 Splice@chr | 7.04E-11 | 0.002118 |
| 1Mar2011-  | 15445 | 937.48 | -13.191  | 3 R.LLPK+14. Splice@chr | 1.01E-10 | 0.002195 |
| 1Mar2011-  | 15673 | 937.48 | -13.191  | 3 R.LLPK+14. chr3@4082  | 6.77E-11 | 0.001176 |
| 19July2011 | 10050 | 848.45 | 25.64077 | 2 R.LCSDSQN chr3@6731   | 3.22E-10 | 0.009768 |
| 19July2011 | 8279  | 740.88 | -6.43451 | 2 K.KTICNSM chr1@9451   | 2.35E-10 | 0.005276 |
| 19July2011 | 1886  | 538.29 | -8.14499 | 3 R.K+14.016 chr2@1312  | 8.96E-11 | 0.002512 |
| 19July2011 | 10699 | 859.95 | -25.4164 | 2 K.HYWCGN Splice@chr   | 2.49E-12 | 3.55E-04 |
| 1Mar2011-  | 15828 | 795.43 | 22.95001 | 2 R.LIYHSSDF Splice@chr | 1.39E-10 | 0.002688 |
| 1Mar2011-  | 15802 | 902.47 | -22.1847 | 2 K.VSDICVL\$ chr4@3822 | 8.71E-11 | 0.002072 |
| 1Mar2011-  | 14931 | 902.47 | -22.1847 | 2 K.VSDICVL\$ chr4@3822 | 2.92E-10 | 0.007271 |
| 1Mar2011-  | 14446 | 902.47 | -22.1847 | 2 K.VSDICVL\$ chr4@3822 | 1.76E-10 | 0.003794 |
| 1Mar2011-  | 13470 | 912.5  | -16.3797 | 2 V.NNKRK+1 chrX@7996   | 8.59E-11 | 0.003486 |
| 1Mar2011-  | 18742 | 960.02 | -28.448  | 2 R.PQIK+14. chr4@3102  | 4.08E-10 | 0.009439 |
| 1Mar2011-  | 6935  | 775.47 | 17.65369 | 2 _K+14.016 Splice@chr  | 2.38E-10 | 0.007328 |
| 1Mar2011-  | 8173  | 473.28 | -20.5032 | 2 R.LQKFGVP chr4@1448   | 4.55E-10 | 0.008564 |
| 19July2011 | 8643  | 815.9  | -20.8966 | 2 F.FNFIK+14 chr2@5896  | 3.20E-10 | 0.008696 |
| 19July2011 | 12770 | 670.34 | -3.25292 | 3 R.LGLSTAS( chr1@6981  | 2.12E-10 | 0.005332 |
| 19July2011 | 79    | 585.28 | -7.24275 | 3 R.NWRVAC chrX@2659    | 4.72E-10 | 0.008168 |
| 19July2011 | 9229  | 806.4  | 11.7698  | 4 K.KNCAEAE chr5@7170   | 2.00E-10 | 0.005031 |
| 1Mar2011-  | 1886  | 416.22 | 25.13721 | 2 R.NADWGI chr5@1688    | 9.62E-11 | 0.002691 |
| 1Mar2011-  | 1834  | 416.22 | 25.13721 | 2 R.NADWGI chr5@1688    | 2.28E-10 | 0.006957 |
| 1Mar2011-  | 3877  | 416.22 | 25.13721 | 2 R.NADWGI chr5@1688    | 1.04E-10 | 0.002242 |
| 1Mar2011-  | 1725  | 416.22 | 25.13721 | 2 R.NADWGI chr5@1688    | 2.69E-10 | 0.006549 |
| 1Mar2011-  | 3458  | 416.22 | 25.13721 | 2 R.NADWGI chr5@1688    | 7.64E-11 | 0.002182 |
| 1Mar2011-  | 3396  | 416.22 | 25.13721 | 2 R.NADWGI chr5@1688    | 9.54E-11 | 0.00251  |
| 1Mar2011-  | 1835  | 416.22 | 25.13721 | 2 R.NADWGI chr5@1688    | 7.10E-11 | 0.001545 |
| 1Mar2011-  | 1948  | 416.22 | 25.13721 | 2 R.NADWGI chr5@1688    | 5.54E-11 | 0.001007 |
| 1Mar2011-  | 2184  | 416.22 | 25.13721 | 2 R.NADWGI chr5@1688    | 2.29E-10 | 0.008302 |
| 1Mar2011-  | 2929  | 416.22 | 25.13721 | 2 R.NADWGI chr5@1688    | 1.05E-10 | 0.00224  |
| 1Mar2011-  | 2876  | 416.22 | 25.13721 | 2 R.NADWGI chr5@1688    | 1.02E-10 | 0.00224  |
| 1Mar2011-  | 3113  | 416.22 | 25.13721 | 2 R.NADWGI chr5@1688    | 2.85E-10 | 0.005617 |
| 1Mar2011-  | 2989  | 416.22 | 25.13721 | 2 R.NADWGI chr5@1688    | 1.54E-10 | 0.002899 |
| 1Mar2011-  | 3035  | 416.22 | 25.13721 | 2 R.NADWGI chr5@1688    | 1.09E-10 | 0.002081 |

|            |       |         |          |                         |          |          |
|------------|-------|---------|----------|-------------------------|----------|----------|
| 1Mar2011-  | 2351  | 416.22  | 25.13721 | 2 R.NADWGI chr5@1688    | 3.25E-10 | 0.009599 |
| 1Mar2011-  | 18766 | 730.99  | -11.7055 | 5 _DISWVLN Splice@chr   | 2.57E-10 | 0.007595 |
| 1Mar2011-  | 11976 | 1135.57 | 6.77837  | 2 R.VSYEVM+ chr3@1188   | 3.39E-10 | 0.009917 |
| 19July2011 | 2920  | 509.78  | -1.01971 | 2 R.DLTAKNT chr2@1051   | 4.05E-10 | 0.007049 |
| 1Mar2011-  | 16032 | 620.54  | 29.55631 | 5 K.YHFKCNS chrX@6205   | 4.32E-10 | 0.008735 |
| 1Mar2011-  | 12308 | 620.54  | 29.55631 | 5 K.YHFKCNS chrX@6205   | 2.20E-10 | 0.007216 |
| 1Mar2011-  | 4785  | 554.3   | -11.5827 | 2 _VIDIYTDII chr1@1135  | 3.09E-10 | 0.008631 |
| 1Mar2011-  | 10538 | 1005.16 | -21.3951 | 3 L.LTTCNRRI Splice@chr | 1.22E-10 | 0.002571 |
| 1Mar2011-  | 9879  | 1005.16 | -21.3951 | 3 L.LTTCNRRI Splice@chr | 8.30E-11 | 0.002    |
| 1Mar2011-  | 10328 | 1005.16 | -21.3951 | 3 L.LTTCNRRI Splice@chr | 8.48E-11 | 0.002306 |
| 1Mar2011-  | 12046 | 1005.16 | -21.3951 | 3 L.LTTCNRRI Splice@chr | 7.13E-11 | 0.003445 |
| 1Mar2011-  | 8255  | 1005.16 | -21.3951 | 3 L.LTTCNRRI Splice@chr | 7.30E-11 | 0.002892 |
| 1Mar2011-  | 10048 | 1005.16 | -21.3951 | 3 L.LTTCNRRI Splice@chr | 9.58E-12 | 3.38E-04 |
| 1Mar2011-  | 11337 | 1005.16 | -21.3951 | 3 L.LTTCNRRI Splice@chr | 5.66E-11 | 0.001126 |
| 1Mar2011-  | 11886 | 1005.16 | -21.3951 | 3 L.LTTCNRRI Splice@chr | 2.46E-11 | 8.18E-04 |
| 1Mar2011-  | 11610 | 1005.16 | -21.3951 | 3 L.LTTCNRRI Splice@chr | 7.15E-11 | 0.002047 |
| 1Mar2011-  | 13045 | 1005.16 | -21.3951 | 3 L.LTTCNRRI Splice@chr | 1.94E-10 | 0.004589 |
| 1Mar2011-  | 10557 | 1005.16 | -21.3951 | 3 L.LTTCNRRI Splice@chr | 2.11E-11 | 5.29E-04 |
| 1Mar2011-  | 8729  | 1005.16 | -21.3951 | 3 L.LTTCNRRI Splice@chr | 1.02E-10 | 0.00303  |
| 1Mar2011-  | 9841  | 1005.16 | -21.3951 | 3 L.LTTCNRRI Splice@chr | 5.53E-11 | 0.001566 |
| 1Mar2011-  | 16843 | 934.53  | -10.7878 | 1 K.TFLFPAP1 chr2@1134  | 1.61E-10 | 0.004944 |
| 1Mar2011-  | 10356 | 1059.89 | -13.9105 | 3 R.PFLTLMK chr1@1394   | 9.55E-11 | 0.00251  |
| 1Mar2011-  | 19052 | 1087.56 | -20.6518 | 2 K.RCNWSR chr3@9406    | 3.99E-11 | 8.00E-04 |
| 1Mar2011-  | 13634 | 945.6   | 15.74359 | 2 Y.QVALLGA chr3@6607   | 7.20E-15 | 0        |
| 1Mar2011-  | 13532 | 630.74  | 22.20865 | 3 Y.QVALLGA chr3@6607   | 1.99E-14 | 0        |
| 1Mar2011-  | 14400 | 630.74  | 22.20865 | 3 Y.QVALLGA chr3@6607   | 3.56E-15 | 0        |
| 1Mar2011-  | 13393 | 630.74  | 22.20865 | 3 Y.QVALLGA chr3@6607   | 5.47E-18 | 0        |
| 1Mar2011-  | 14010 | 630.74  | 22.20865 | 3 Y.QVALLGA chr3@6607   | 2.23E-15 | 0        |
| 1Mar2011-  | 15120 | 630.74  | 22.20865 | 3 Y.QVALLGA chr3@6607   | 1.50E-13 | 0        |
| 1Mar2011-  | 13919 | 630.74  | 22.20865 | 3 Y.QVALLGA chr3@6607   | 1.56E-13 | 0        |
| 1Mar2011-  | 13119 | 630.74  | 22.20865 | 3 Y.QVALLGA chr3@6607   | 5.96E-14 | 0        |
| 1Mar2011-  | 15180 | 630.74  | 22.20865 | 3 Y.QVALLGA chr3@6607   | 2.52E-14 | 0        |
| 1Mar2011-  | 12836 | 630.74  | 22.20865 | 3 Y.QVALLGA chr3@6607   | 4.10E-13 | 0        |
| 1Mar2011-  | 13355 | 630.41  | 29.28677 | 3 Y.QVALLGA chr3@6607   | 1.09E-12 | 0        |
| 1Mar2011-  | 13404 | 630.41  | 29.28677 | 3 Y.QVALLGA chr3@6607   | 5.24E-13 | 0        |
| 1Mar2011-  | 6025  | 725.87  | 5.520591 | 2 R.MEHLCRI Splice@chr  | 1.40E-10 | 0.00318  |
| 1Mar2011-  | 5675  | 725.87  | 5.520591 | 2 R.MEHLCRI Splice@chr  | 2.13E-10 | 0.005123 |
| 1Mar2011-  | 18112 | 1142.58 | -7.89675 | 3 K.WSLHENI Splice@chr  | 1.35E-10 | 0.00374  |
| 1Mar2011-  | 6404  | 595.33  | 16.43181 | 3 R.DECYASK Splice@chr  | 2.02E-11 | 8.07E-04 |
| 19July2011 | 9811  | 1095.57 | -0.87322 | 3 K.HRSMSIH chr5@8066   | 4.94E-10 | 0.00814  |
| 1Mar2011-  | 2819  | 603.8   | 15.39086 | 2 R.RHYCCRV Splice@chr  | 2.12E-10 | 0.005586 |
| 1Mar2011-  | 17224 | 934.53  | 3.733075 | 1 R.VPAIVFCI chr2@8739  | 1.92E-10 | 0.00362  |
| 1Mar2011-  | 19529 | 934.53  | 3.733075 | 1 R.VPAIVFCI chr2@8739  | 5.26E-11 | 8.57E-04 |
| 1Mar2011-  | 7061  | 569.29  | -13.2739 | 2 R.EYIVENLE chrX@5346  | 4.71E-10 | 0.009999 |
| 1Mar2011-  | 7114  | 569.29  | -13.2739 | 2 R.EYIVENLE chrX@5346  | 4.62E-10 | 0.009605 |
| 19July2011 | 2884  | 598.8   | -5.30922 | 2 K.EGTTK+1 chr4@5814   | 2.14E-11 | 0.001944 |
| 1Mar2011-  | 14433 | 989.59  | -16.0522 | 2 R.KKHTKSK chr3@1065   | 9.58E-11 | 0.002899 |

|            |       |         |          |                        |          |          |
|------------|-------|---------|----------|------------------------|----------|----------|
| 1Mar2011-  | 10141 | 545.8   | -14.7882 | 2 R.AVLMVY chr1@9430   | 1.80E-10 | 0.006828 |
| 1Mar2011-  | 16882 | 1183.73 | 12.72726 | 2 R.KTRRRRR Splice@chr | 4.03E-11 | 0.001418 |
| 19July2011 | 12488 | 1157.64 | 23.57339 | 2 Q.VNNKNY chr4@1645   | 1.45E-10 | 0.005282 |
| 1Mar2011-  | 1497  | 490.29  | 7.297594 | 2 K.MNIYVLV chrX@1595  | 6.90E-11 | 0.002182 |
| 1Mar2011-  | 1413  | 490.29  | 7.297594 | 2 K.MNIYVLV chrX@1595  | 8.53E-11 | 0.002404 |
| 1Mar2011-  | 891   | 490.29  | 7.297594 | 2 K.MNIYVLV chrX@1595  | 1.14E-10 | 0.004057 |
| 1Mar2011-  | 1148  | 490.29  | 7.297594 | 2 K.MNIYVLV chrX@1595  | 8.10E-11 | 0.002279 |
| 1Mar2011-  | 1064  | 490.29  | 7.297594 | 2 K.MNIYVLV chrX@1595  | 1.57E-10 | 0.004576 |
| 1Mar2011-  | 17297 | 893.03  | 10.98945 | 2 K.FSK+14.0 chr2@1284 | 2.60E-10 | 0.006505 |
| 1Mar2011-  | 18035 | 1149.71 | -20.0655 | 2 R.K+14.016 chr4@1276 | 1.33E-10 | 0.004241 |
| 19July2011 | 15474 | 664.39  | 0.952288 | 3 K.IIIWTRK+ chrX@1392 | 1.35E-10 | 0.002682 |
| 1Mar2011-  | 16273 | 691.88  | -17.6358 | 2 K.NFAVVYL chr4@2890  | 3.59E-11 | 0.001795 |
| 1Mar2011-  | 12618 | 956.45  | -24.5736 | 2 R.LCFQLLL Splice@chr | 6.59E-11 | 0.00334  |
| 1Mar2011-  | 11058 | 955.95  | -22.8171 | 2 R.LCFQLLL Splice@chr | 2.56E-10 | 0.006071 |
| 1Mar2011-  | 12778 | 955.97  | -1.91741 | 2 R.LCFQLLL Splice@chr | 2.08E-10 | 0.005547 |
| 1Mar2011-  | 13208 | 956.45  | -24.5736 | 2 R.LCFQLLL Splice@chr | 9.70E-11 | 0.002098 |
| 1Mar2011-  | 15904 | 948.96  | 8.021539 | 2 K.K+14.016 chr5@8447 | 1.06E-10 | 0.003858 |
| 19July2011 | 9197  | 896.5   | -1.72667 | 3 R.KNQIK+1 chr4@1054  | 3.11E-10 | 0.004604 |
| 1Mar2011-  | 6458  | 680.35  | -24.1389 | 2 K.ILNSGNLI chr2@1427 | 1.45E-10 | 0.004304 |
| 19July2011 | 10542 | 862.98  | 27.43004 | 4 R.RNSFRIAI chr2@8654 | 2.56E-10 | 0.006573 |
| 1Mar2011-  | 3686  | 496.25  | -2.34175 | 3 R.TEEEMGI chr1@4716  | 1.50E-10 | 0.004204 |
| 19July2011 | 16453 | 536.29  | 2.394515 | 2 _MYKLKCS chr2@1345   | 3.89E-10 | 0.008322 |
| 1Mar2011-  | 11212 | 1044.54 | -9.5921  | 2 K.KEHWIRC Splice@chr | 2.92E-10 | 0.007423 |
| 1Mar2011-  | 17988 | 1088.26 | -15.2691 | 3 K.KIVMEKI chr1@3381  | 2.50E-10 | 0.007025 |
| 1Mar2011-  | 12682 | 711.88  | 9.788083 | 2 P.AAGFGIF Splice@chr | 6.15E-12 | 0        |
| 1Mar2011-  | 12724 | 711.88  | 9.788083 | 2 P.AAGFGIF Splice@chr | 5.14E-12 | 0        |
| 1Mar2011-  | 13575 | 711.88  | 9.788083 | 2 P.AAGFGIF Splice@chr | 2.29E-11 | 4.36E-04 |
| 1Mar2011-  | 11108 | 711.88  | 9.788083 | 2 P.AAGFGIF Splice@chr | 8.46E-12 | 3.63E-04 |
| 1Mar2011-  | 12131 | 711.88  | 9.788083 | 2 P.AAGFGIF Splice@chr | 4.56E-12 | 0        |
| 1Mar2011-  | 17092 | 1111.01 | -23.6436 | 2 K.QSVECLV chr3@1042  | 3.22E-10 | 0.006921 |
| 19July2011 | 4508  | 494.63  | 6.559255 | 3 K.QTGLRHL chr4@4996  | 1.94E-10 | 0.008661 |
| 19July2011 | 234   | 512.27  | 5.790028 | 2 K.TVADFFA chr1@3334  | 9.36E-11 | 0.001885 |
| 1Mar2011-  | 16948 | 1073.06 | -7.40124 | 2 R.QERRK+1 chrX@1686  | 1.32E-12 | 0        |
| 1Mar2011-  | 13474 | 796.53  | 9.20689  | 2 R.KIKISK+1 chr5@1837 | 2.64E-10 | 0.0061   |
| 1Mar2011-  | 7408  | 480.78  | 14.94822 | 2 K.NLAGHLT chr5@9039  | 1.46E-10 | 0.002686 |
| 19July2011 | 10237 | 794.43  | 19.5658  | 4 _NNQNYSI chr1@9719   | 8.35E-11 | 0.001955 |
| 1Mar2011-  | 198   | 447.74  | -24.0456 | 2 K.IIYDGSVK chrX@2516 | 1.35E-10 | 0.00306  |
| 1Mar2011-  | 1089  | 452.57  | -9.69229 | 3 K.REVEYLEI chrX@1207 | 1.54E-10 | 0.005213 |
| 1Mar2011-  | 1398  | 452.24  | 0.180351 | 3 K.REVEYLEI chr5@1357 | 3.09E-10 | 0.007589 |
| 1Mar2011-  | 6850  | 621.35  | 22.30549 | 2 _KSSFLAEI chr3@2165  | 2.61E-10 | 0.006533 |
| 1Mar2011-  | 18866 | 987.25  | 15.24422 | 4 K.HLNK+14 chr1@7032  | 8.73E-11 | 0.001886 |
| 19July2011 | 4686  | 686.72  | -0.83076 | 3 _IVQNINV chr4@1615   | 3.02E-10 | 0.006064 |
| 1Mar2011-  | 14669 | 942.46  | 15.36515 | 2 K.FYGSFVD chr1@1236  | 2.81E-10 | 0.006904 |
| 1Mar2011-  | 13743 | 933.49  | -25.5921 | 2 R.KYLLNM+ chr5@1408  | 2.75E-10 | 0.006801 |
| 19July2011 | 10582 | 764.74  | -10.8686 | 3 K.K+14.016 chr3@1156 | 2.88E-10 | 0.005327 |
| 1Mar2011-  | 14828 | 1113.95 | -9.05081 | 3 K.CLTNLCIT chr5@1416 | 2.76E-10 | 0.007295 |
| 1Mar2011-  | 1839  | 616.84  | -0.09911 | 2 _SSRHLPIS Splice@chr | 2.26E-10 | 0.004846 |

|            |       |         |          |                          |          |          |
|------------|-------|---------|----------|--------------------------|----------|----------|
| 1Mar2011-  | 1933  | 400.72  | -24.431  | 2 R.VSEIGAPI chr1@1896   | 2.59E-10 | 0.006066 |
| 19July2011 | 1672  | 552.32  | 8.368152 | 2 K.CGIWVRI chr2@1110    | 1.94E-10 | 0.006577 |
| 1Mar2011-  | 4192  | 422.75  | -26.3386 | 2 R.AITVIAEK chr2@3802   | 3.34E-10 | 0.008961 |
| 19July2011 | 2525  | 478.25  | 25.6081  | 2 K.EESPVHT chr5@1225    | 1.74E-10 | 0.004904 |
| 1Mar2011-  | 17594 | 895.45  | -12.2543 | 2 K.KNIFDLQ chr4@1509    | 4.31E-10 | 0.009812 |
| 1Mar2011-  | 10377 | 582.04  | -14.3911 | 4 R.LIFNK+14 chr2@3454   | 3.47E-10 | 0.009476 |
| 1Mar2011-  | 16418 | 844.81  | 16.42733 | 3 R.LLAVLSGI chr5@6882   | 2.57E-10 | 0.006885 |
| 1Mar2011-  | 17105 | 844.81  | 16.42733 | 3 R.LLAVLSGI chr5@6882   | 3.05E-10 | 0.009694 |
| 1Mar2011-  | 16696 | 844.81  | 16.42733 | 3 R.LLAVLSGI chr5@6882   | 8.10E-11 | 0.002149 |
| 1Mar2011-  | 13955 | 1086.06 | -19.0124 | 2 K.SSEISLFF( Splice@chr | 2.37E-10 | 0.006957 |
| 1Mar2011-  | 16343 | 1086.57 | -11.4458 | 2 K.SSEISLFF( chr4@2315  | 3.98E-10 | 0.009163 |
| 1Mar2011-  | 7074  | 451.93  | -11.0991 | 3 R.TFIKNFLN chr3@1331   | 2.60E-10 | 0.008257 |
| 19July2011 | 4465  | 609.66  | -7.42061 | 3 R.SGHIHAY chr5@1144    | 1.98E-10 | 0.005467 |
| 1Mar2011-  | 14234 | 920.5   | 14.1611  | 3 _FQVKTSR Splice@chr    | 6.91E-12 | 0        |
| 19July2011 | 8750  | 866.15  | -15.9909 | 3 K.K+14.016 chr4@4402   | 1.43E-10 | 0.006163 |
| 19July2011 | 6907  | 742.61  | -24.1138 | 4 _NLFQSKY chr5@5594     | 1.69E-10 | 0.00474  |
| 1Mar2011-  | 13438 | 837.91  | -20.6133 | 2 K.KFIDFCSE chr2@2459   | 2.55E-10 | 0.007994 |
| 1Mar2011-  | 10574 | 679.35  | -18.573  | 3 R.NM+15.9 chrX@1706    | 3.03E-10 | 0.008998 |
| 19July2011 | 5129  | 489.31  | -14.0617 | 2 R.VGGIHLIL chrX@6735   | 1.06E-10 | 0.003099 |
| 19July2011 | 202   | 452.21  | -20.561  | 3 R.SSSSNSG: chr3@3176   | 2.72E-10 | 0.007189 |
| 19July2011 | 16044 | 702.74  | 25.78841 | 3 K.QRISSESL chr3@7905   | 6.58E-11 | 0.001655 |
| 1Mar2011-  | 3795  | 564.32  | -0.4334  | 2 R.FLKYGTR: chr5@5959   | 3.01E-10 | 0.007474 |
| 1Mar2011-  | 3461  | 564.32  | -0.4334  | 2 R.FLKYGTR: chr5@5959   | 3.48E-10 | 0.006458 |
| 1Mar2011-  | 2985  | 593.83  | -17.6053 | 2 R.RLEVCLA: chr3@1798   | 1.68E-10 | 0.004411 |
| 1Mar2011-  | 5103  | 423.26  | -10.1904 | 2 R.STVAAKIF chr3@3295   | 1.18E-10 | 0.003584 |
| 1Mar2011-  | 6867  | 423.26  | -10.1904 | 2 R.STVAAKIF chr3@3295   | 2.66E-10 | 0.005487 |
| 1Mar2011-  | 5671  | 423.26  | -10.1904 | 2 R.STVAAKIF chr3@3295   | 1.23E-10 | 0.00259  |
| 1Mar2011-  | 14611 | 793.39  | -9.55131 | 2 R.TYGAAPC chr1@1018    | 1.80E-10 | 0.003614 |
| 1Mar2011-  | 14657 | 813.47  | 1.542311 | 2 K.MFGFWK chr2@1339     | 9.11E-11 | 0.004163 |
| 1Mar2011-  | 3642  | 613.84  | -1.89231 | 2 K.LPGIADG chr2@1865    | 3.92E-15 | 0        |
| 1Mar2011-  | 4693  | 613.84  | -1.89231 | 2 K.LPGIADG chr2@1865    | 1.96E-13 | 0        |
| 1Mar2011-  | 4635  | 613.84  | -1.89231 | 2 K.LPGIADG chr2@1865    | 3.05E-15 | 0        |
| 1Mar2011-  | 3284  | 613.84  | -1.89231 | 2 K.LPGIADG chr2@1865    | 4.47E-13 | 0        |
| 1Mar2011-  | 3336  | 613.84  | -1.89231 | 2 K.LPGIADG chr2@1865    | 5.50E-13 | 2.13E-04 |
| 1Mar2011-  | 3240  | 613.84  | -1.89231 | 2 K.LPGIADG chr2@1865    | 1.18E-11 | 3.63E-04 |
| 1Mar2011-  | 4275  | 613.84  | -1.89231 | 2 K.LPGIADG chr2@1865    | 2.00E-12 | 0        |
| 1Mar2011-  | 4222  | 613.84  | -1.89231 | 2 K.LPGIADG chr2@1865    | 3.85E-12 | 0        |
| 1Mar2011-  | 4330  | 613.84  | -1.89231 | 2 K.LPGIADG chr2@1865    | 4.44E-14 | 0        |
| 1Mar2011-  | 4172  | 613.84  | -1.89231 | 2 K.LPGIADG chr2@1865    | 7.02E-12 | 1.80E-04 |
| 1Mar2011-  | 10990 | 519.95  | 9.409253 | 3 R.VVGGLLE Splice@chr   | 2.93E-10 | 0.007106 |
| 1Mar2011-  | 1284  | 410.73  | 25.02711 | 2 R.VVEFGNF Splice@chr   | 4.28E-10 | 0.008265 |
| 1Mar2011-  | 16401 | 1175.1  | -15.5953 | 2 K.CRQILRSF chr5@5688   | 3.42E-10 | 0.008299 |
| 1Mar2011-  | 7608  | 858.92  | 2.347752 | 2 R.RAHFSAS chr5@3178    | 1.12E-10 | 0.002521 |
| 1Mar2011-  | 7366  | 1059.56 | -5.15085 | 3 _FDAFGEP Splice@chr    | 2.67E-10 | 0.005383 |
| 1Mar2011-  | 5705  | 482.78  | -14.4551 | 2 K.NTFLNVK chr3@2589    | 2.66E-10 | 0.007839 |
| 1Mar2011-  | 15024 | 836.95  | 4.202105 | 2 F.FEEHGKV chr3@4857    | 2.55E-10 | 0.006687 |
| 1Mar2011-  | 15062 | 937.02  | -25.8216 | 2 K.KK+14.01 chr5@1726   | 2.06E-10 | 0.004691 |

|            |       |         |          |                         |          |          |
|------------|-------|---------|----------|-------------------------|----------|----------|
| 19July2011 | 6873  | 762.74  | -6.7059  | 3 S.PHGARSC chr5@7194   | 4.36E-10 | 0.008243 |
| 1Mar2011-  | 5233  | 585.82  | 10.39539 | 2 K.TQSLSYKI chrX@1447  | 2.89E-10 | 0.007179 |
| 19July2011 | 14686 | 744.42  | -6.73227 | 2 _._CWK+14. chr1@1371  | 1.71E-10 | 0.006127 |
| 19July2011 | 8699  | 793.41  | -16.3291 | 2 R.KFLETSSA chr5@1396  | 2.89E-10 | 0.005694 |
| 1Mar2011-  | 10592 | 719.38  | 9.940786 | 1 R.GSSPFPK chr5@9796   | 5.68E-10 | 0.00997  |
| 1Mar2011-  | 8973  | 817.41  | -4.56339 | 1 _._NVPEETK Splice@chr | 2.07E-10 | 0.00415  |
| 19July2011 | 9988  | 670.15  | 14.59446 | 4 R.RKVVWC chrX@7097    | 5.18E-11 | 0.001671 |
| 19July2011 | 4222  | 576.8   | -1.16602 | 2 Y.LSTTM+1 chr1@4695   | 5.01E-11 | 0.002714 |
| 19July2011 | 87    | 473.77  | 6.971627 | 2 K.KEVVRCR chrX@8506   | 2.28E-10 | 0.007547 |
| 19July2011 | 3631  | 719.12  | -16.7274 | 4 R.NDKFSKS chr4@1625   | 2.00E-10 | 0.004641 |
| 1Mar2011-  | 3598  | 435.27  | -28.9523 | 2 R.KSVIPGIR chrX@8230  | 2.08E-10 | 0.00562  |
| 1Mar2011-  | 3142  | 435.27  | -28.9523 | 2 R.KSVIPGIR chrX@8230  | 2.06E-10 | 0.006373 |
| 19July2011 | 4725  | 686.72  | 6.17139  | 3 R.TFFYKSIG chr4@1346  | 2.62E-10 | 0.005694 |
| 1Mar2011-  | 6734  | 674.91  | 13.82396 | 2 I.NIILHAIFH chr2@9529 | 2.04E-10 | 0.004483 |
| 1Mar2011-  | 6677  | 674.91  | 13.82396 | 2 I.NIILHAIFH chr2@9529 | 3.91E-10 | 0.008101 |
| 1Mar2011-  | 1831  | 603.31  | 10.39753 | 2 K.EK+14.01 chrX@1671  | 3.21E-10 | 0.006111 |
| 1Mar2011-  | 15048 | 1160.05 | 27.73919 | 2 R.M+15.99 Splice@chr  | 1.28E-12 | 0        |
| 1Mar2011-  | 13985 | 590.27  | 1.504999 | 2 R.GRCGER/ chr2@1401   | 5.06E-10 | 0.00906  |
| 19July2011 | 6169  | 663.82  | 24.31107 | 2 R.QECTNFL chr1@1210   | 1.02E-10 | 0.002149 |
| 19July2011 | 7521  | 578.04  | 14.41915 | 4 K.MGKTTIC chr2@1371   | 1.49E-10 | 0.004613 |
| 19July2011 | 7213  | 857.44  | -21.8386 | 3 T.ENNKLSK chr5@6794   | 4.61E-11 | 0.001579 |
| 19July2011 | 975   | 471.23  | -6.3632  | 3 R.HM+15.9 Splice@chr  | 1.24E-10 | 0.00327  |
| 1Mar2011-  | 761   | 404.54  | -14.0158 | 3 K.TWQQVF chr4@1512    | 8.54E-11 | 0.001664 |
| 1Mar2011-  | 733   | 404.54  | -14.0158 | 3 K.TWQQVF chr4@1512    | 4.68E-10 | 0.009262 |
| 1Mar2011-  | 16408 | 955.13  | 18.11092 | 3 P.AYSPM+1 chr5@2048   | 2.74E-10 | 0.006469 |
| 1Mar2011-  | 7739  | 821.45  | 28.79092 | 2 _._SPTLGGN Splice@chr | 1.99E-16 | 0        |
| 1Mar2011-  | 6332  | 821.45  | 28.79092 | 2 _._SPTLGGN Splice@chr | 4.67E-18 | 0        |
| 1Mar2011-  | 6512  | 821.45  | 28.79092 | 2 _._SPTLGGN Splice@chr | 6.71E-15 | 0        |
| 1Mar2011-  | 7819  | 821.45  | 28.79092 | 2 _._SPTLGGN Splice@chr | 2.38E-16 | 0        |
| 1Mar2011-  | 7683  | 821.45  | 28.79092 | 2 _._SPTLGGN Splice@chr | 1.67E-17 | 0        |
| 1Mar2011-  | 6978  | 821.45  | 28.79092 | 2 _._SPTLGGN Splice@chr | 1.56E-19 | 0        |
| 1Mar2011-  | 7701  | 821.45  | 28.79092 | 2 _._SPTLGGN Splice@chr | 2.09E-20 | 0        |
| 1Mar2011-  | 6457  | 821.45  | 28.79092 | 2 _._SPTLGGN Splice@chr | 7.17E-20 | 0        |
| 19July2011 | 8633  | 835.95  | 12.93905 | 4 K.MPFLLK+ chr2@2237   | 3.80E-10 | 0.0094   |
| 1Mar2011-  | 3773  | 1042.63 | 20.8607  | 1 R.MPQVVL chr3@1242    | 1.03E-10 | 0.00338  |
| 1Mar2011-  | 528   | 471.76  | -7.71439 | 2 R.RSPMNIP chr5@2635   | 3.33E-11 | 5.22E-04 |
| 1Mar2011-  | 15010 | 597.3   | -0.20472 | 2 K.MSQKIM chr4@7334    | 3.18E-10 | 0.007771 |
| 19July2011 | 8721  | 515.62  | -9.01384 | 3 K.KNLMK+ chr5@3832    | 2.16E-10 | 0.007399 |
| 19July2011 | 4790  | 567.8   | -3.98434 | 4 R.ITAAM+1 chr5@1769   | 1.42E-10 | 0.006163 |
| 1Mar2011-  | 12703 | 904.95  | -13.8416 | 2 R.KSCWNK chr4@9188    | 6.82E-12 | 0        |
| 19July2011 | 11192 | 849.41  | -8.03571 | 3 K.SFLDILCN Splice@chr | 3.03E-10 | 0.009085 |
| 19July2011 | 7139  | 801.41  | -6.75147 | 2 R.FSISHSSN chr3@9649  | 4.48E-11 | 0.001851 |
| 1Mar2011-  | 16902 | 937.08  | 3.556654 | 2 K.KWRRRK chr5@1275    | 3.21E-10 | 0.007192 |
| 19July2011 | 6304  | 799.9   | -18.6412 | 2 K.FKNVQFY chr2@1232   | 1.78E-10 | 0.004304 |
| 19July2011 | 3474  | 645.36  | 13.98443 | 2 K.REMQQK chr2@5904    | 6.20E-11 | 0.003599 |
| 19July2011 | 9879  | 699.38  | 10.7154  | 2 K.WKLLLIW Splice@chr  | 5.21E-10 | 0.009058 |
| 1Mar2011-  | 16136 | 655.11  | -22.8608 | 4 K.HIK+14.0 chr5@2015  | 7.51E-11 | 0.002312 |

|            |       |         |          |                         |          |          |
|------------|-------|---------|----------|-------------------------|----------|----------|
| 1Mar2011-  | 7983  | 550.96  | -21.6781 | 3 K.MKK+14. chr1@1008   | 2.01E-10 | 0.003829 |
| 1Mar2011-  | 8624  | 550.97  | -3.62535 | 3 K.MKK+14. chr1@1008   | 1.05E-11 | 6.08E-04 |
| 1Mar2011-  | 18665 | 1152.61 | -26.6302 | 3 R.M+15.99 chr5@1522   | 3.80E-10 | 0.008842 |
| 19July2011 | 6042  | 672.35  | -19.8191 | 2 R.FKFLPKCf chrX@9534  | 3.05E-10 | 0.004378 |
| 1Mar2011-  | 1855  | 679.4   | -20.9626 | 2 K.KDQK+14 Splice@chr  | 3.30E-10 | 0.009015 |
| 1Mar2011-  | 15616 | 992.48  | 10.93366 | 2 _.M+15.99 chr4@9449   | 1.54E-10 | 0.003412 |
| 1Mar2011-  | 7431  | 490.26  | -18.2966 | 3 K.IKKYNSVf chr4@8061  | 1.88E-10 | 0.004315 |
| 1Mar2011-  | 19529 | 892.49  | -15.952  | 2 R.KK+14.01 chrX@1007  | 5.11E-11 | 0.002382 |
| 19July2011 | 629   | 601.84  | -5.68869 | 2 R.KNVIDCR chr2@9990   | 1.13E-10 | 0.004236 |
| 1Mar2011-  | 7941  | 654.84  | 19.3238  | 2 K.KMTDETf Splice@chr  | 1.89E-10 | 0.007292 |
| 19July2011 | 6771  | 452.75  | 11.22915 | 2 K.VDDGEIK chrX@2692   | 4.00E-10 | 0.008681 |
| 19July2011 | 2859  | 520.94  | -26.6861 | 3 K.MTNAFTf chrX@7939   | 2.88E-10 | 0.007615 |
| 19July2011 | 1025  | 482.93  | 2.617428 | 3 K.LAIAEITG chr2@1331  | 1.45E-10 | 0.006163 |
| 19July2011 | 5456  | 637.31  | 20.71951 | 3 K.DM+15.9 Splice@chr  | 1.03E-10 | 0.005034 |
| 1Mar2011-  | 19687 | 1123.29 | 17.71757 | 3 K.LSLKM+1 chr3@1267   | 2.03E-10 | 0.004267 |
| 1Mar2011-  | 13529 | 970.48  | -25.2452 | 1 R.LGWRCR chr5@6376    | 3.14E-10 | 0.006574 |
| 1Mar2011-  | 5276  | 683.32  | -11.0921 | 2 R.VYGVNVI chrX@1049   | 5.46E-12 | 3.38E-04 |
| 1Mar2011-  | 9916  | 1130.09 | -8.54098 | 2 K.K+14.016 chr2@5528  | 1.19E-10 | 0.003739 |
| 1Mar2011-  | 14085 | 795.03  | 29.45474 | 3 _.VLEAGGL Splice@chr  | 2.92E-10 | 0.006463 |
| 1Mar2011-  | 4177  | 475.77  | -7.46202 | 2 K.FENVTVL chrX@2666   | 7.07E-11 | 0.002344 |
| 19July2011 | 4188  | 432.89  | -12.9629 | 3 K.MIKK+14 chr3@7915   | 7.08E-11 | 0.003546 |
| 19July2011 | 227   | 469.25  | -27.1989 | 3 K.K+14.016 chr2@1354  | 1.40E-10 | 0.005098 |
| 19July2011 | 8677  | 640.58  | -9.9994  | 4 R.HDRERQf Splice@chr  | 2.04E-10 | 0.005346 |
| 1Mar2011-  | 11110 | 700.36  | -9.60003 | 2 K.IPVNSLSC chr2@1255  | 1.36E-10 | 0.003117 |
| 19July2011 | 14835 | 794.67  | -12.3653 | 4 L.K+14.016 chr4@1607  | 3.87E-10 | 0.009948 |
| 19July2011 | 11213 | 587.84  | -19.3451 | 2 K.GLFLSSGI Splice@chr | 3.50E-11 | 0.001796 |
| 19July2011 | 3395  | 775.72  | 1.155504 | 3 _.SCFK+14. chr3@1301  | 1.98E-10 | 0.004641 |
| 1Mar2011-  | 10957 | 929.46  | -24.3676 | 2 S.K+14.016 chrX@1717  | 2.51E-10 | 0.006853 |
| 1Mar2011-  | 19044 | 741.72  | 15.96669 | 3 _.VTEKVLEf chr2@1306  | 1.54E-11 | 4.29E-04 |
| 19July2011 | 2650  | 544.31  | -19.7716 | 2 _.KNKRREE chr1@4840   | 2.93E-10 | 0.007217 |
| 19July2011 | 4355  | 670.67  | -7.74991 | 3 K.RGKDRRE chr2@1469   | 4.48E-10 | 0.007808 |
| 19July2011 | 409   | 625.8   | 2.201486 | 2 _.RSNRVSA Splice@chr  | 4.53E-11 | 0.001579 |
| 1Mar2011-  | 1990  | 487.3   | -12.802  | 2 R.IKANTVSI chr5@1320  | 1.58E-10 | 0.005469 |
| 19July2011 | 15255 | 556.3   | 21.32404 | 3 _.VCLQGAf Splice@chr  | 1.68E-10 | 0.005976 |
| 19July2011 | 251   | 460.77  | 9.027337 | 2 R.M+15.99 chr3@8356   | 2.11E-10 | 0.004161 |
| 1Mar2011-  | 620   | 636.37  | 23.67296 | 1 K.FAAGAAf chrX@1578   | 1.33E-10 | 0.003002 |
| 1Mar2011-  | 15186 | 1150.1  | 1.940518 | 2 K.IDKYTLM chr2@1049   | 8.96E-11 | 0.001763 |
| 1Mar2011-  | 16672 | 1143.2  | -0.93462 | 2 K.FIDFSGIS chr1@2675  | 5.50E-11 | 0.002063 |
| 1Mar2011-  | 9293  | 995.55  | 0.400186 | 2 R.TRRK+14 Splice@chr  | 2.41E-10 | 0.006536 |
| 1Mar2011-  | 8342  | 879.99  | 28.5228  | 2 Q.K+14.01f chr5@7136  | 9.11E-11 | 0.002138 |
| 1Mar2011-  | 8054  | 879.99  | 28.5228  | 2 Q.K+14.01f chr5@7136  | 1.23E-10 | 0.002422 |
| 1Mar2011-  | 8574  | 879.99  | 28.5228  | 2 Q.K+14.01f chr5@7136  | 2.92E-10 | 0.008746 |
| 1Mar2011-  | 7349  | 879.98  | 17.12806 | 2 Q.K+14.01f chr5@7136  | 2.52E-10 | 0.005919 |
| 1Mar2011-  | 13212 | 1161.07 | 28.4122  | 2 R.SIYKFYSN chr4@1047  | 9.61E-11 | 0.002949 |
| 1Mar2011-  | 5880  | 584.99  | -25.4099 | 3 _.NLTFSKKI chr5@3050  | 1.01E-10 | 0.001653 |
| 1Mar2011-  | 11779 | 722.91  | -26.4373 | 2 K.MLLRTSR Splice@chr  | 2.19E-10 | 0.006074 |
| 1Mar2011-  | 4046  | 437.9   | -8.56838 | 3 R.VSGKNM chr5@1875    | 1.16E-10 | 0.004155 |

|           |       |        |          |                         |          |          |
|-----------|-------|--------|----------|-------------------------|----------|----------|
| 1Mar2011- | 2599  | 525.32 | -25.0275 | 2 K.HLKIIIGVC chr2@3316 | 6.02E-11 | 0.001903 |
| 1Mar2011- | 2696  | 525.32 | -25.0275 | 2 K.HLKIIIGVC chr2@3316 | 2.71E-10 | 0.007046 |
| 1Mar2011- | 11444 | 856.97 | 3.779227 | 2 R.LLELAPTc chr2@6685  | 2.03E-13 | 0        |
| 1Mar2011- | 11387 | 857.47 | 1.819561 | 2 R.LLELAPTc chr2@6685  | 6.85E-18 | 0        |
| 1Mar2011- | 11664 | 856.97 | 3.779227 | 2 R.LLELAPTc chr2@6685  | 1.65E-17 | 0        |
| 1Mar2011- | 12779 | 857.47 | 1.819561 | 2 R.LLELAPTc chr2@6685  | 1.33E-19 | 0        |
| 1Mar2011- | 11752 | 856.97 | 3.779227 | 2 R.LLELAPTc chr2@6685  | 8.48E-18 | 0        |
| 1Mar2011- | 11696 | 857.47 | 1.819561 | 2 R.LLELAPTc chr2@6685  | 2.77E-18 | 0        |
| 1Mar2011- | 11241 | 857.47 | 1.819561 | 2 R.LLELAPTc chr2@6685  | 4.47E-17 | 0        |
| 1Mar2011- | 11187 | 856.97 | 3.779227 | 2 R.LLELAPTc chr2@6685  | 2.34E-17 | 0        |
| 1Mar2011- | 12582 | 856.97 | 3.779227 | 2 R.LLELAPTc chr2@6685  | 4.77E-17 | 0        |
| 1Mar2011- | 12639 | 856.97 | 3.779227 | 2 R.LLELAPTc chr2@6685  | 1.54E-17 | 0        |
| 1Mar2011- | 13200 | 856.97 | 3.779227 | 2 R.LLELAPTc chr2@6685  | 5.32E-18 | 0        |
| 1Mar2011- | 13248 | 856.97 | 3.779227 | 2 R.LLELAPTc chr2@6685  | 1.25E-18 | 0        |
| 1Mar2011- | 12369 | 857.47 | 1.819561 | 2 R.LLELAPTc chr2@6685  | 1.93E-16 | 0        |
| 1Mar2011- | 9029  | 856.97 | 3.779227 | 2 R.LLELAPTc chr2@6685  | 4.18E-19 | 0        |
| 1Mar2011- | 8984  | 857.47 | 1.819561 | 2 R.LLELAPTc chr2@6685  | 3.26E-18 | 0        |
| 1Mar2011- | 10074 | 856.97 | 3.779227 | 2 R.LLELAPTc chr2@6685  | 1.99E-16 | 0        |
| 1Mar2011- | 11087 | 856.97 | 3.779227 | 2 R.LLELAPTc chr2@6685  | 2.84E-17 | 0        |
| 1Mar2011- | 11141 | 856.97 | 3.779227 | 2 R.LLELAPTc chr2@6685  | 3.94E-17 | 0        |
| 1Mar2011- | 10683 | 856.97 | 3.779227 | 2 R.LLELAPTc chr2@6685  | 7.10E-18 | 0        |
| 1Mar2011- | 10735 | 856.97 | 3.779227 | 2 R.LLELAPTc chr2@6685  | 1.17E-17 | 0        |
| 1Mar2011- | 11398 | 857.47 | 1.819561 | 2 R.LLELAPTc chr2@6685  | 7.84E-18 | 0        |
| 1Mar2011- | 11015 | 856.97 | 3.779227 | 2 R.LLELAPTc chr2@6685  | 4.67E-16 | 0        |
| 1Mar2011- | 10969 | 856.97 | 3.779227 | 2 R.LLELAPTc chr2@6685  | 1.72E-14 | 0        |
| 1Mar2011- | 12136 | 856.97 | 3.779227 | 2 R.LLELAPTc chr2@6685  | 8.39E-18 | 0        |
| 1Mar2011- | 10756 | 856.97 | 3.779227 | 2 R.LLELAPTc chr2@6685  | 2.24E-17 | 0        |
| 1Mar2011- | 10648 | 856.97 | 3.779227 | 2 R.LLELAPTc chr2@6685  | 4.65E-18 | 0        |
| 1Mar2011- | 10699 | 857.47 | 1.819561 | 2 R.LLELAPTc chr2@6685  | 1.97E-17 | 0        |
| 1Mar2011- | 11971 | 857.48 | 13.51377 | 2 R.LLELAPTc chr2@6685  | 4.20E-17 | 0        |
| 1Mar2011- | 12021 | 856.97 | 3.779227 | 2 R.LLELAPTc chr2@6685  | 1.32E-16 | 0        |
| 1Mar2011- | 10565 | 856.97 | 3.779227 | 2 R.LLELAPTc chr2@6685  | 1.11E-17 | 0        |
| 1Mar2011- | 11936 | 856.97 | 3.779227 | 2 R.LLELAPTc chr2@6685  | 8.43E-18 | 0        |
| 1Mar2011- | 12507 | 856.97 | 3.779227 | 2 R.LLELAPTc chr2@6685  | 3.56E-17 | 0        |
| 1Mar2011- | 12449 | 856.97 | 3.779227 | 2 R.LLELAPTc chr2@6685  | 4.79E-17 | 0        |
| 1Mar2011- | 10849 | 857.47 | 1.819561 | 2 R.LLELAPTc chr2@6685  | 3.40E-17 | 0        |
| 1Mar2011- | 10899 | 856.97 | 3.779227 | 2 R.LLELAPTc chr2@6685  | 2.49E-17 | 0        |
| 1Mar2011- | 12149 | 856.97 | 3.779227 | 2 R.LLELAPTc chr2@6685  | 5.10E-18 | 0        |
| 1Mar2011- | 12096 | 856.97 | 3.779227 | 2 R.LLELAPTc chr2@6685  | 2.23E-17 | 0        |
| 1Mar2011- | 10329 | 856.97 | 3.779227 | 2 R.LLELAPTc chr2@6685  | 1.98E-17 | 0        |
| 1Mar2011- | 10430 | 856.97 | 3.779227 | 2 R.LLELAPTc chr2@6685  | 1.62E-15 | 0        |
| 1Mar2011- | 10484 | 856.97 | 3.779227 | 2 R.LLELAPTc chr2@6685  | 2.97E-16 | 0        |
| 1Mar2011- | 12132 | 856.97 | 3.779227 | 2 R.LLELAPTc chr2@6685  | 2.17E-16 | 0        |
| 1Mar2011- | 10808 | 856.97 | 3.779227 | 2 R.LLELAPTc chr2@6685  | 1.20E-17 | 0        |
| 1Mar2011- | 12325 | 856.97 | 3.779227 | 2 R.LLELAPTc chr2@6685  | 1.35E-18 | 0        |
| 1Mar2011- | 12269 | 856.97 | 3.779227 | 2 R.LLELAPTc chr2@6685  | 1.66E-17 | 0        |
| 1Mar2011- | 12862 | 856.97 | 3.779227 | 2 R.LLELAPTc chr2@6685  | 8.54E-14 | 0        |

|            |       |         |          |                         |          |          |
|------------|-------|---------|----------|-------------------------|----------|----------|
| 1Mar2011-  | 12754 | 856.97  | 3.779227 | 2 R.LLELAPTChr2@6685    | 1.67E-16 | 0        |
| 1Mar2011-  | 12802 | 856.97  | 3.779227 | 2 R.LLELAPTChr2@6685    | 1.13E-17 | 0        |
| 1Mar2011-  | 11277 | 856.97  | 3.779227 | 2 R.LLELAPTChr2@6685    | 1.11E-16 | 0        |
| 1Mar2011-  | 12020 | 856.97  | 3.779227 | 2 R.LLELAPTChr2@6685    | 2.11E-18 | 0        |
| 1Mar2011-  | 12079 | 856.97  | 3.779227 | 2 R.LLELAPTChr2@6685    | 2.43E-17 | 0        |
| 1Mar2011-  | 9866  | 857.47  | 1.819561 | 2 R.LLELAPTChr2@6685    | 1.40E-17 | 0        |
| 1Mar2011-  | 9916  | 857.47  | 1.819561 | 2 R.LLELAPTChr2@6685    | 3.49E-18 | 0        |
| 1Mar2011-  | 10591 | 856.97  | 3.779227 | 2 R.LLELAPTChr2@6685    | 6.16E-18 | 0        |
| 1Mar2011-  | 10543 | 856.97  | 3.779227 | 2 R.LLELAPTChr2@6685    | 1.66E-17 | 0        |
| 1Mar2011-  | 10692 | 856.97  | 3.779227 | 2 R.LLELAPTChr2@6685    | 6.60E-17 | 0        |
| 1Mar2011-  | 10637 | 857.47  | 1.819561 | 2 R.LLELAPTChr2@6685    | 1.90E-16 | 0        |
| 1Mar2011-  | 10306 | 856.97  | 3.779227 | 2 R.LLELAPTChr2@6685    | 7.35E-18 | 0        |
| 1Mar2011-  | 10248 | 856.97  | 3.779227 | 2 R.LLELAPTChr2@6685    | 1.39E-18 | 0        |
| 1Mar2011-  | 10384 | 857.47  | 1.819561 | 2 R.LLELAPTChr2@6685    | 3.62E-17 | 0        |
| 1Mar2011-  | 9539  | 856.97  | 3.779227 | 2 R.LLELAPTChr2@6685    | 2.30E-16 | 0        |
| 1Mar2011-  | 9049  | 856.97  | 3.779227 | 2 R.LLELAPTChr2@6685    | 1.30E-17 | 0        |
| 1Mar2011-  | 15949 | 1063.05 | -25.3832 | 2 K.FFLPRIVC Splice@chr | 3.43E-10 | 0.009476 |
| 1Mar2011-  | 16357 | 1066.55 | 6.79203  | 2 K.SSDDRKR Splice@chr  | 1.95E-10 | 0.004536 |
| 19July2011 | 8058  | 513.95  | 26.73387 | 3 K.NRNFRSF chr4@7985   | 6.48E-11 | 0.001746 |
| 1Mar2011-  | 5840  | 821.44  | -11.4565 | 1 R.RHAPNAI Splice@chr  | 2.24E-10 | 0.005863 |
| 1Mar2011-  | 584   | 410.73  | -9.75726 | 2 R.VVKMTD chrX@1171    | 9.13E-11 | 0.002072 |
| 1Mar2011-  | 720   | 410.73  | -9.75726 | 2 R.VVKMTD chrX@1171    | 1.90E-10 | 0.005592 |
| 1Mar2011-  | 503   | 410.73  | -9.75726 | 2 R.VVKMTD chrX@1171    | 1.85E-10 | 0.005086 |
| 1Mar2011-  | 6814  | 496.28  | -8.87288 | 2 _.KAMTQA chr2@5166    | 2.03E-10 | 0.005218 |
| 1Mar2011-  | 1823  | 415.74  | -1.69243 | 2 _.PSSGKGA chr5@1215   | 5.61E-11 | 0.002497 |
| 1Mar2011-  | 19761 | 942.45  | -27.3582 | 1 K.GAASDTF chr2@1237   | 3.98E-11 | 0.001098 |
| 1Mar2011-  | 3258  | 588.32  | -0.46622 | 2 _.ELVVMEL Splice@chr  | 9.90E-12 | 3.09E-04 |
| 1Mar2011-  | 3155  | 588.31  | -17.5241 | 2 _.ELVVMEL Splice@chr  | 2.38E-10 | 0.007328 |
| 19July2011 | 12280 | 811.78  | -22.985  | 3 K.ISQKKVM chr2@1265   | 4.60E-10 | 0.00856  |
| 19July2011 | 2751  | 419.21  | 11.23801 | 2 R.ESLETMK chr1@8015   | 2.86E-10 | 0.00614  |
| 1Mar2011-  | 8756  | 986.5   | -26.5069 | 2 K.KSKKSCA. chr1@9876  | 2.39E-10 | 0.005758 |
| 1Mar2011-  | 8767  | 986.5   | -26.5069 | 2 K.KSKKSCA. chr1@9876  | 5.33E-11 | 0.001302 |
| 1Mar2011-  | 784   | 494.3   | -26.6881 | 2 R.KAWLNV Splice@chr   | 4.15E-10 | 0.009188 |
| 1Mar2011-  | 2136  | 571.83  | 21.06467 | 2 K.DVARVNI chr2@1078   | 1.48E-11 | 4.62E-04 |
| 19July2011 | 5285  | 659.69  | -15.7524 | 3 K.PM+15.9 chr4@3088   | 2.19E-11 | 0.001187 |
| 1Mar2011-  | 12769 | 1076.58 | -7.35107 | 2 R.SDWRDS chr5@1845    | 2.77E-10 | 0.008008 |
| 19July2011 | 8196  | 697.71  | 7.509585 | 3 R.LKMVENI chr2@7191   | 2.23E-10 | 0.005275 |
| 1Mar2011-  | 17131 | 1154.7  | -10.6865 | 1 _.IGNGRK+ Splice@chr  | 2.47E-11 | 4.39E-04 |
| 1Mar2011-  | 18316 | 1154.71 | -2.01034 | 1 _.IGNGRK+ Splice@chr  | 1.81E-10 | 0.004195 |
| 1Mar2011-  | 20115 | 1139.63 | -20.0287 | 2 _.NTKK+14 Splice@chr  | 3.89E-10 | 0.009146 |
| 1Mar2011-  | 16409 | 911.48  | 4.662828 | 2 _.TKYKLM+ chr4@1312   | 6.05E-11 | 0.001639 |
| 19July2011 | 5120  | 554.62  | -16.0961 | 3 K.SLSESENE chr1@8950  | 3.32E-10 | 0.006152 |
| 1Mar2011-  | 20621 | 1154.32 | 28.32271 | 3 R.AMERHQ Splice@chr   | 2.77E-10 | 0.006758 |
| 19July2011 | 3700  | 569.29  | -4.56675 | 2 R.DSGNGM Splice@chr   | 3.37E-10 | 0.008177 |
| 19July2011 | 10689 | 892.83  | -19.9837 | 3 K.FLIHSFEK chr1@1656  | 6.86E-11 | 0.001492 |
| 1Mar2011-  | 13563 | 864.68  | -13.3419 | 4 R.LSLIGDN\ chrX@1195  | 2.45E-10 | 0.007384 |
| 1Mar2011-  | 13942 | 1177.03 | 9.372888 | 2 _.VLEAGGL Splice@chr  | 2.29E-10 | 0.00431  |

|            |       |         |          |                         |          |          |
|------------|-------|---------|----------|-------------------------|----------|----------|
| 1Mar2011-  | 15136 | 1177.03 | 9.372888 | 2 _..VLEAGGL Splice@chr | 1.25E-10 | 0.00246  |
| 1Mar2011-  | 14998 | 1177.04 | 17.88814 | 2 _..VLEAGGL Splice@chr | 3.31E-10 | 0.00916  |
| 1Mar2011-  | 14520 | 1177.03 | 9.372888 | 2 _..VLEAGGL Splice@chr | 1.19E-10 | 0.00296  |
| 1Mar2011-  | 15297 | 1177.04 | 17.88814 | 2 _..VLEAGGL Splice@chr | 4.99E-11 | 0.001285 |
| 1Mar2011-  | 806   | 426.28  | 19.66266 | 2 R.LIPGIGGF chr2@1220  | 2.69E-10 | 0.006909 |
| 1Mar2011-  | 736   | 426.28  | 19.66266 | 2 R.LIPGIGGF chr2@1220  | 3.35E-10 | 0.008939 |
| 1Mar2011-  | 189   | 522.33  | 21.42566 | 2 K.GKGSRAF chr1@1288   | 6.27E-11 | 0.00221  |
| 19July2011 | 501   | 402.22  | 18.55982 | 3 R.GETRAGC chr1@1035   | 2.86E-10 | 0.008008 |
| 19July2011 | 3175  | 624.39  | -24.9357 | 2 R.KNK+14.( chrX@1115  | 1.58E-11 | 7.95E-04 |
| 19July2011 | 13732 | 905.15  | -0.54005 | 3 T.TTPTTTT Splice@chr  | 1.22E-11 | 6.76E-04 |
| 19July2011 | 13781 | 905.15  | -0.54005 | 3 T.TTPTTTT Splice@chr  | 1.57E-10 | 0.003627 |
| 19July2011 | 8869  | 905.15  | -0.54005 | 3 T.TTPTTTT Splice@chr  | 4.39E-11 | 0.001427 |
| 1Mar2011-  | 11268 | 664.87  | -19.3069 | 2 K.PLAVDLLI Splice@chr | 2.29E-13 | 0        |
| 1Mar2011-  | 11323 | 664.87  | -19.3069 | 2 K.PLAVDLLI Splice@chr | 6.96E-15 | 0        |
| 1Mar2011-  | 9889  | 664.87  | -19.3069 | 2 K.PLAVDLLI Splice@chr | 6.35E-13 | 0        |
| 1Mar2011-  | 9714  | 664.87  | -19.3069 | 2 K.PLAVDLLI Splice@chr | 1.53E-13 | 0        |
| 1Mar2011-  | 9767  | 664.87  | -19.3069 | 2 K.PLAVDLLI Splice@chr | 1.19E-14 | 0        |
| 1Mar2011-  | 9853  | 664.87  | -19.3069 | 2 K.PLAVDLLI Splice@chr | 1.86E-14 | 0        |
| 1Mar2011-  | 9798  | 664.87  | -19.3069 | 2 K.PLAVDLLI Splice@chr | 4.58E-13 | 0        |
| 1Mar2011-  | 9226  | 664.87  | -19.3069 | 2 K.PLAVDLLI Splice@chr | 6.55E-14 | 0        |
| 1Mar2011-  | 9174  | 664.87  | -19.3069 | 2 K.PLAVDLLI Splice@chr | 6.89E-13 | 0        |
| 1Mar2011-  | 9945  | 664.87  | -19.3069 | 2 K.PLAVDLLI Splice@chr | 2.32E-13 | 0        |
| 1Mar2011-  | 9892  | 664.87  | -19.3069 | 2 K.PLAVDLLI Splice@chr | 6.26E-13 | 0        |
| 1Mar2011-  | 17022 | 1068.02 | -2.94627 | 2 K.FGFLK+14 chr4@1375  | 3.19E-10 | 0.009234 |
| 1Mar2011-  | 526   | 557.79  | -25.8699 | 2 K.TFLGHPS chr3@1025   | 2.37E-10 | 0.006237 |
| 1Mar2011-  | 405   | 557.79  | -25.8699 | 2 K.TFLGHPS chr3@1025   | 1.40E-10 | 0.0043   |
| 19July2011 | 1234  | 509.26  | -20.3546 | 2 _..QNETAQI chr5@1674  | 2.41E-10 | 0.00704  |
| 19July2011 | 5964  | 866.09  | 2.282966 | 3 R.YWWSLC Splice@chr   | 1.54E-10 | 0.004727 |
| 1Mar2011-  | 12736 | 792.42  | 25.2966  | 4 K.TFDETQL chrX@5040   | 1.49E-10 | 0.005347 |
| 19July2011 | 8868  | 661.71  | 3.852182 | 3 R.SRSPTKIV chr5@8584  | 9.46E-11 | 0.003056 |
| 1Mar2011-  | 18554 | 772.39  | 9.985544 | 1 R.ASAFGYR chr1@1232   | 3.55E-10 | 0.00742  |
| 19July2011 | 10107 | 760.43  | -12.0554 | 2 K.M+15.99 Splice@chr  | 3.32E-10 | 0.006221 |
| 19July2011 | 3194  | 724.34  | -25.1185 | 2 R.FTSEFSK+ chrX@6384  | 2.26E-10 | 0.009503 |
| 1Mar2011-  | 11691 | 948.49  | 26.02565 | 2 K.CRMK+14 chr5@1762   | 3.09E-10 | 0.008079 |
| 1Mar2011-  | 11722 | 551.67  | 7.35818  | 3 R.VDALLITF chrX@1565  | 2.83E-10 | 0.008381 |
| 19July2011 | 9986  | 663.04  | -24.7687 | 3 _..ILKQYFLE chr4@1715 | 7.43E-11 | 0.00275  |
| 19July2011 | 8734  | 670.34  | 20.97371 | 3 K.TRESSEK chr3@3865   | 3.32E-11 | 8.09E-04 |
| 1Mar2011-  | 20181 | 1114.09 | -23.8896 | 2 _..YRQK+14 Splice@chr | 1.46E-10 | 0.003274 |
| 19July2011 | 7377  | 607.57  | -21.1307 | 4 R.ENWLDFI chr2@1225   | 1.03E-10 | 0.006584 |
| 1Mar2011-  | 15378 | 765.87  | -3.57146 | 4 R.QFWIENC chr4@1435   | 8.64E-11 | 0.001644 |
| 1Mar2011-  | 17434 | 936.02  | 6.434464 | 2 K.QLRYFQ chr1@6624    | 3.30E-10 | 0.008708 |
| 19July2011 | 10403 | 840.76  | -21.497  | 3 _..M+15.99 chr5@1595  | 1.36E-11 | 9.00E-04 |
| 19July2011 | 1901  | 446.73  | 1.304764 | 2 K.WNTFAPi chr4@1026   | 3.67E-10 | 0.008991 |
| 19July2011 | 1906  | 446.73  | 1.304764 | 2 K.WNTFAPi chr4@1026   | 2.90E-10 | 0.007749 |
| 19July2011 | 8204  | 1049.86 | 13.68043 | 3 _..YGYVCSQ chr2@1235  | 1.18E-10 | 0.005909 |
| 1Mar2011-  | 13238 | 1045.04 | -14.2409 | 2 _..RM+15.9 chrX@1525  | 4.12E-10 | 0.009937 |
| 19July2011 | 376   | 862.43  | -9.49434 | 1 K.RDTVTDf chr2@5702   | 2.09E-10 | 0.005277 |

|            |       |         |          |                         |          |          |
|------------|-------|---------|----------|-------------------------|----------|----------|
| 1Mar2011-  | 10770 | 654.37  | -26.6887 | 2 K.LFWSSAA chr5@2645   | 2.04E-10 | 0.007088 |
| 19July2011 | 5026  | 772.4   | -20.4662 | 3 R.ANISMIEI chr3@7765  | 2.45E-10 | 0.006483 |
| 1Mar2011-  | 5722  | 448.59  | -16.1819 | 3 K.ILSDLFLIN chrX@7135 | 4.81E-11 | 0.001883 |
| 1Mar2011-  | 18334 | 1154.71 | -11.3822 | 1 K.IDLQTLKI chr1@1345  | 1.36E-10 | 0.002736 |
| 19July2011 | 6498  | 791.41  | -26.6403 | 2 K.FQFRRFV chr1@3455   | 2.33E-10 | 0.006418 |
| 1Mar2011-  | 373   | 666.37  | 24.12616 | 2 _KNEFFTEI chr2@1385   | 6.81E-12 | 0        |
| 19July2011 | 7597  | 737.75  | -18.4464 | 3 I.SSSFENKL chr1@1331  | 2.16E-10 | 0.005152 |
| 1Mar2011-  | 3578  | 488.92  | 7.505729 | 3 R.DFAQAAI chr3@1118   | 1.89E-10 | 0.004745 |
| 1Mar2011-  | 4600  | 539.27  | -6.87913 | 3 R.MFWTSV Splice@chr   | 1.46E-10 | 0.004806 |
| 19July2011 | 7755  | 859.45  | -19.3218 | 3 R.EKSYEK+ chr5@1808   | 2.17E-11 | 2.70E-04 |
| 1Mar2011-  | 17199 | 1021.06 | -12.9841 | 2 R.YWLLKN\ chrX@2206   | 3.41E-10 | 0.009819 |
| 1Mar2011-  | 2700  | 593.34  | -8.71255 | 2 R.RSTFGSFI chrX@1374  | 8.93E-11 | 0.002404 |
| 19July2011 | 2292  | 538.27  | 7.157106 | 2 R.ESREARD chr4@7921   | 1.69E-10 | 0.00474  |
| 19July2011 | 5539  | 742.38  | -28.4021 | 2 M.EMLAVV Splice@chr   | 1.93E-10 | 0.005467 |
| 19July2011 | 5     | 405.2   | 1.812067 | 3 K.CNMSGIF chr1@1190   | 1.03E-10 | 0.008278 |
| 1Mar2011-  | 11348 | 796.85  | -17.639  | 2 K.SDNAYCA chr5@5217   | 4.55E-10 | 0.009846 |
| 1Mar2011-  | 13172 | 796.85  | -17.639  | 2 K.SDNAYCA chr5@5217   | 3.07E-10 | 0.007228 |
| 19July2011 | 997   | 415.74  | 28.62493 | 2 K.IGGGGGk chr1@1111   | 2.28E-10 | 0.005554 |
| 1Mar2011-  | 10478 | 949.51  | 8.236739 | 2 K.KLDKNFY chr5@1347   | 1.13E-10 | 0.003316 |
| 1Mar2011-  | 16843 | 1163.62 | -0.73498 | 2 _PNEVSEIS Splice@chr  | 8.95E-11 | 0.002067 |
| 1Mar2011-  | 14370 | 592.63  | -27.7164 | 3 W.KFFVFFY chr1@2018   | 3.57E-10 | 0.009538 |
| 19July2011 | 2747  | 429.84  | -17.6485 | 5 _KPSKTDEI chr2@1084   | 1.47E-11 | 2.55E-04 |
| 1Mar2011-  | 1004  | 480.28  | 29.19673 | 2 K.ENTKPELI chrX@1128  | 3.76E-10 | 0.009338 |
| 19July2011 | 10057 | 756.05  | 9.732709 | 3 _SPQRPTD Splice@chr   | 3.45E-10 | 0.008276 |
| 1Mar2011-  | 11457 | 649.4   | -5.74209 | 2 _KLLYAYSk Splice@chr  | 1.32E-10 | 0.002204 |
| 1Mar2011-  | 13672 | 885.99  | -23.9781 | 2 _FPLEMPII chr1@2625   | 2.20E-10 | 0.006027 |
| 19July2011 | 3469  | 447.26  | 14.01941 | 2 K.YPHVLHK chr5@2087   | 4.48E-10 | 0.00856  |
| 1Mar2011-  | 2242  | 526.77  | -26.7813 | 2 K.LSCSRSTI Splice@chr | 2.11E-10 | 0.004598 |
| 1Mar2011-  | 13784 | 954.07  | 10.09302 | 2 K.KTILM+1 Splice@chr  | 2.81E-10 | 0.009953 |
| 1Mar2011-  | 7313  | 553.27  | -28.955  | 2 R.LDREFNP chrX@1141   | 6.05E-11 | 0.002022 |
| 1Mar2011-  | 18936 | 936.02  | -26.1558 | 2 K.FVK+14.C chr5@1807  | 1.74E-10 | 0.004322 |
| 19July2011 | 3954  | 462.59  | -26.0046 | 3 _QALYSYSI chrX@3392   | 3.76E-10 | 0.006376 |
| 1Mar2011-  | 16035 | 936.52  | -2.02251 | 2 _YWK+14. chr5@1067    | 1.36E-10 | 0.00306  |
| 1Mar2011-  | 17392 | 1020.55 | 6.488275 | 3 _YLYKM+1 chr4@5755    | 1.98E-10 | 0.003829 |
| 19July2011 | 9427  | 847.75  | -18.0683 | 3 K.KDEINTF chr3@5740   | 3.41E-10 | 0.00784  |
| 1Mar2011-  | 21163 | 776.94  | 18.95752 | 4 E.LFQIIVM/ chr2@1065  | 1.54E-10 | 0.003391 |
| 1Mar2011-  | 19777 | 1035.56 | -4.24774 | 3 E.LFQIIVM/ chr2@1065  | 1.80E-11 | 5.57E-04 |
| 1Mar2011-  | 21124 | 1035.56 | -4.24774 | 3 E.LFQIIVM/ chr2@1065  | 4.12E-11 | 0.001051 |
| 1Mar2011-  | 22346 | 1035.56 | -4.24774 | 3 E.LFQIIVM/ chr2@1065  | 4.70E-11 | 0.001202 |
| 1Mar2011-  | 18328 | 1035.56 | -4.24774 | 3 E.LFQIIVM/ chr2@1065  | 1.51E-10 | 0.005068 |
| 1Mar2011-  | 18316 | 1035.56 | -4.24774 | 3 E.LFQIIVM/ chr2@1065  | 3.79E-13 | 0        |
| 1Mar2011-  | 18338 | 776.92  | -6.84359 | 4 E.LFQIIVM/ chr2@1065  | 2.07E-12 | 0        |
| 1Mar2011-  | 18368 | 1035.56 | -4.24774 | 3 E.LFQIIVM/ chr2@1065  | 3.17E-11 | 0.001411 |
| 1Mar2011-  | 19224 | 1035.56 | -4.24774 | 3 E.LFQIIVM/ chr2@1065  | 2.71E-11 | 5.76E-04 |
| 1Mar2011-  | 19214 | 1035.56 | -4.24774 | 3 E.LFQIIVM/ chr2@1065  | 1.91E-11 | 2.95E-04 |
| 1Mar2011-  | 18914 | 1035.56 | -4.24774 | 3 E.LFQIIVM/ chr2@1065  | 2.78E-11 | 0.001022 |
| 1Mar2011-  | 18898 | 1035.56 | -4.24774 | 3 E.LFQIIVM/ chr2@1065  | 1.94E-12 | 0        |

|            |       |         |          |                         |          |          |
|------------|-------|---------|----------|-------------------------|----------|----------|
| 1Mar2011-  | 17933 | 1035.56 | -4.24774 | 3 E.LFQIIVM/ chr2@1065  | 6.64E-12 | 0        |
| 1Mar2011-  | 16945 | 1035.56 | -4.24774 | 3 E.LFQIIVM/ chr2@1065  | 3.52E-11 | 0.001109 |
| 1Mar2011-  | 19564 | 1035.56 | -4.24774 | 3 E.LFQIIVM/ chr2@1065  | 1.72E-11 | 8.07E-04 |
| 1Mar2011-  | 18416 | 1035.56 | -4.24774 | 3 E.LFQIIVM/ chr2@1065  | 3.89E-11 | 7.33E-04 |
| 1Mar2011-  | 18238 | 1035.56 | -4.24774 | 3 E.LFQIIVM/ chr2@1065  | 5.89E-11 | 0.001903 |
| 1Mar2011-  | 21240 | 1035.56 | -4.24774 | 3 E.LFQIIVM/ chr2@1065  | 4.98E-11 | 0.001285 |
| 1Mar2011-  | 21209 | 1035.56 | -4.24774 | 3 E.LFQIIVM/ chr2@1065  | 6.25E-11 | 0.001523 |
| 1Mar2011-  | 18983 | 1035.56 | -4.24774 | 3 E.LFQIIVM/ chr2@1065  | 3.92E-11 | 0.001176 |
| 1Mar2011-  | 19000 | 1035.56 | -4.24774 | 3 E.LFQIIVM/ chr2@1065  | 2.19E-12 | 1.84E-04 |
| 1Mar2011-  | 12574 | 631.36  | -0.65299 | 4 K.ISKKFKS chr5@2775   | 1.84E-10 | 0.004207 |
| 1Mar2011-  | 4755  | 483.94  | 28.22667 | 3 R.ALLTNSV chr3@6555   | 2.92E-10 | 0.008618 |
| 1Mar2011-  | 8470  | 1092.86 | -4.60321 | 3 T.EVIIMNH Splice@chr  | 7.73E-16 | 0        |
| 1Mar2011-  | 8813  | 1092.86 | -4.60321 | 3 T.EVIIMNH Splice@chr  | 1.60E-13 | 0        |
| 1Mar2011-  | 9412  | 1092.86 | -4.60321 | 3 T.EVIIMNH Splice@chr  | 4.19E-15 | 0        |
| 1Mar2011-  | 8970  | 1092.86 | -4.60321 | 3 T.EVIIMNH Splice@chr  | 3.69E-18 | 0        |
| 1Mar2011-  | 9069  | 1092.86 | -4.60321 | 3 T.EVIIMNH Splice@chr  | 3.62E-16 | 0        |
| 1Mar2011-  | 7466  | 1092.86 | -4.60321 | 3 T.EVIIMNH Splice@chr  | 1.27E-15 | 0        |
| 1Mar2011-  | 8886  | 749.42  | -5.11842 | 4 R.NKLTVLF chr2@1816   | 2.41E-10 | 0.006001 |
| 1Mar2011-  | 13308 | 1009.56 | 22.99722 | 2 F.AGKTITLE Splice@chr | 2.55E-11 | 5.64E-04 |
| 19July2011 | 10107 | 848.43  | -16.4658 | 2 R.DIWQWT Splice@chr   | 7.50E-11 | 0.003093 |
| 19July2011 | 3088  | 522.29  | -2.81007 | 2 R.HIAGTKN chr5@2225   | 1.40E-10 | 0.002821 |
| 1Mar2011-  | 1547  | 586.37  | 7.194616 | 2 K.NIVNKMI Splice@chr  | 3.57E-10 | 0.006651 |
| 19July2011 | 2520  | 844.91  | -17.3306 | 2 L.CEK+14.0 chr3@3074  | 3.04E-10 | 0.00885  |
| 1Mar2011-  | 14605 | 731.88  | -22.2687 | 2 K.LENLNLN chr4@1095   | 3.97E-10 | 0.009566 |
| 1Mar2011-  | 19951 | 1007.88 | -16.9576 | 3 _ .INKYLSFS chr4@1538 | 3.71E-10 | 0.008842 |
| 1Mar2011-  | 20989 | 883.68  | -27.9251 | 4 K.RRIPRNA Splice@chr  | 6.83E-11 | 0.001026 |
| 1Mar2011-  | 5803  | 538.8   | -23.8328 | 2 R.VLLVQMI chr4@7995   | 3.21E-10 | 0.006654 |
| 1Mar2011-  | 4941  | 631.35  | -16.5574 | 2 K.VVLSQHC Splice@chr  | 3.47E-10 | 0.007465 |
| 1Mar2011-  | 4997  | 631.35  | -16.5574 | 2 K.VVLSQHC Splice@chr  | 4.59E-10 | 0.009045 |
| 1Mar2011-  | 2207  | 603.55  | 14.31512 | 4 R.VKNNFIG Splice@chr  | 2.28E-10 | 0.005372 |
| 19July2011 | 2519  | 470.77  | 23.25761 | 2 K.LSLHEVD chr5@1542   | 1.38E-10 | 0.002682 |
| 1Mar2011-  | 18497 | 861     | -13.6686 | 2 _ .FIWELLS Splice@chr | 3.68E-10 | 0.009868 |
| 19July2011 | 9922  | 732.38  | -20.2313 | 3 R.PM+15.9 chr2@1046   | 4.37E-11 | 0.00105  |
| 1Mar2011-  | 14683 | 1009.48 | -17.3696 | 2 K.DGTFIYFE Splice@chr | 3.88E-10 | 0.008039 |
| 1Mar2011-  | 15520 | 1009.48 | -17.3696 | 2 K.DGTFIYFE Splice@chr | 3.32E-10 | 0.006654 |
| 1Mar2011-  | 15354 | 1009.48 | -17.3696 | 2 K.DGTFIYFE Splice@chr | 1.88E-11 | 9.48E-04 |
| 1Mar2011-  | 15410 | 1009.49 | -7.44413 | 2 K.DGTFIYFE Splice@chr | 3.88E-10 | 0.009146 |
| 1Mar2011-  | 13986 | 1009.49 | -7.44413 | 2 K.DGTFIYFE Splice@chr | 1.83E-10 | 0.004392 |
| 1Mar2011-  | 15215 | 1009.49 | -7.44413 | 2 K.DGTFIYFE Splice@chr | 1.54E-10 | 0.003391 |
| 1Mar2011-  | 15865 | 1009.48 | -17.3696 | 2 K.DGTFIYFE Splice@chr | 2.96E-10 | 0.00719  |
| 1Mar2011-  | 14515 | 1009.48 | -17.3696 | 2 K.DGTFIYFE Splice@chr | 1.54E-10 | 0.004076 |
| 1Mar2011-  | 16686 | 1009.48 | -17.3696 | 2 K.DGTFIYFE Splice@chr | 3.36E-10 | 0.007776 |
| 1Mar2011-  | 16350 | 1009.49 | -7.44413 | 2 K.DGTFIYFE Splice@chr | 1.14E-10 | 0.002969 |
| 1Mar2011-  | 15792 | 1009.48 | -17.3696 | 2 K.DGTFIYFE Splice@chr | 7.71E-11 | 0.003541 |
| 1Mar2011-  | 15845 | 1009.48 | -17.3696 | 2 K.DGTFIYFE Splice@chr | 1.25E-10 | 0.004381 |
| 1Mar2011-  | 11257 | 1009.48 | -17.3696 | 2 K.DGTFIYFE Splice@chr | 9.29E-11 | 0.00322  |
| 1Mar2011-  | 11208 | 1009.48 | -17.3696 | 2 K.DGTFIYFE Splice@chr | 4.18E-11 | 0.001868 |

|           |       |         |          |                         |          |          |
|-----------|-------|---------|----------|-------------------------|----------|----------|
| 1Mar2011- | 11160 | 1009.49 | -7.44413 | 2 K.DGTFIYFE Splice@chr | 1.11E-10 | 0.003528 |
| 1Mar2011- | 13811 | 1009.48 | -17.3696 | 2 K.DGTFIYFE Splice@chr | 1.64E-10 | 0.005068 |
| 1Mar2011- | 13756 | 1009.49 | -7.44413 | 2 K.DGTFIYFE Splice@chr | 3.13E-10 | 0.007087 |
| 1Mar2011- | 13867 | 1009.48 | -17.3696 | 2 K.DGTFIYFE Splice@chr | 3.79E-10 | 0.007823 |
| 1Mar2011- | 14254 | 1009.49 | -7.44413 | 2 K.DGTFIYFE Splice@chr | 3.32E-10 | 0.009907 |
| 1Mar2011- | 13800 | 1009.49 | -7.44413 | 2 K.DGTFIYFE Splice@chr | 6.40E-11 | 0.001979 |
| 1Mar2011- | 14423 | 1009.48 | -17.3696 | 2 K.DGTFIYFE Splice@chr | 2.10E-10 | 0.007466 |
| 1Mar2011- | 14367 | 1009.49 | -7.44413 | 2 K.DGTFIYFE Splice@chr | 1.72E-10 | 0.005964 |
| 1Mar2011- | 14310 | 1009.49 | -7.44413 | 2 K.DGTFIYFE Splice@chr | 2.45E-10 | 0.00791  |
| 1Mar2011- | 12528 | 1009.49 | -7.44413 | 2 K.DGTFIYFE Splice@chr | 1.02E-10 | 0.002962 |
| 1Mar2011- | 13135 | 1009.49 | -7.44413 | 2 K.DGTFIYFE Splice@chr | 3.05E-10 | 0.009441 |
| 1Mar2011- | 12971 | 1009.49 | -7.44413 | 2 K.DGTFIYFE Splice@chr | 2.65E-11 | 4.93E-04 |
| 1Mar2011- | 13024 | 1009.49 | -7.44413 | 2 K.DGTFIYFE Splice@chr | 8.22E-11 | 0.00215  |
| 1Mar2011- | 13559 | 1009.49 | -7.44413 | 2 K.DGTFIYFE Splice@chr | 1.86E-10 | 0.004201 |
| 1Mar2011- | 15175 | 1009.48 | -17.3696 | 2 K.DGTFIYFE Splice@chr | 2.20E-10 | 0.004377 |
| 1Mar2011- | 15213 | 1009.48 | -17.3696 | 2 K.DGTFIYFE Splice@chr | 2.16E-10 | 0.004377 |
| 1Mar2011- | 13287 | 1009.49 | -7.44413 | 2 K.DGTFIYFE Splice@chr | 1.81E-10 | 0.004336 |
| 1Mar2011- | 13183 | 1009.49 | -7.44413 | 2 K.DGTFIYFE Splice@chr | 1.35E-10 | 0.003215 |
| 1Mar2011- | 13242 | 1009.49 | -7.44413 | 2 K.DGTFIYFE Splice@chr | 1.70E-11 | 3.74E-04 |
| 1Mar2011- | 13191 | 1009.49 | -7.44413 | 2 K.DGTFIYFE Splice@chr | 2.65E-11 | 0.001083 |
| 1Mar2011- | 13523 | 1009.49 | -7.44413 | 2 K.DGTFIYFE Splice@chr | 2.51E-10 | 0.008702 |
| 1Mar2011- | 12798 | 1009.48 | -17.3696 | 2 K.DGTFIYFE Splice@chr | 1.89E-10 | 0.005838 |
| 1Mar2011- | 15257 | 1009.48 | -17.3696 | 2 K.DGTFIYFE Splice@chr | 2.60E-10 | 0.006013 |
| 1Mar2011- | 15365 | 1009.48 | -17.3696 | 2 K.DGTFIYFE Splice@chr | 6.94E-11 | 0.002294 |
| 1Mar2011- | 15423 | 1009.48 | -17.3696 | 2 K.DGTFIYFE Splice@chr | 6.91E-11 | 0.002181 |
| 1Mar2011- | 15310 | 1009.48 | -17.3696 | 2 K.DGTFIYFE Splice@chr | 1.03E-10 | 0.002752 |
| 1Mar2011- | 15736 | 1009.48 | -17.3696 | 2 K.DGTFIYFE Splice@chr | 1.62E-10 | 0.004764 |
| 1Mar2011- | 15625 | 1009.48 | -17.3696 | 2 K.DGTFIYFE Splice@chr | 3.72E-10 | 0.009272 |
| 1Mar2011- | 15682 | 1009.49 | -7.44413 | 2 K.DGTFIYFE Splice@chr | 2.61E-10 | 0.006195 |
| 1Mar2011- | 15274 | 1009.49 | -7.44413 | 2 K.DGTFIYFE Splice@chr | 1.32E-10 | 0.00395  |
| 1Mar2011- | 15101 | 1009.49 | -7.44413 | 2 K.DGTFIYFE Splice@chr | 1.79E-10 | 0.005086 |
| 1Mar2011- | 12719 | 1009.49 | -7.44413 | 2 K.DGTFIYFE Splice@chr | 1.70E-10 | 0.005065 |
| 1Mar2011- | 15760 | 1009.48 | -17.3696 | 2 K.DGTFIYFE Splice@chr | 2.40E-11 | 8.18E-04 |
| 1Mar2011- | 15003 | 1009.99 | -9.1074  | 2 K.DGTFIYFE Splice@chr | 4.74E-11 | 0.0017   |
| 1Mar2011- | 15656 | 1009.49 | -7.44413 | 2 K.DGTFIYFE Splice@chr | 8.10E-11 | 0.002279 |
| 1Mar2011- | 15710 | 1009.48 | -17.3696 | 2 K.DGTFIYFE Splice@chr | 1.29E-10 | 0.002952 |
| 1Mar2011- | 15604 | 1009.49 | -7.44413 | 2 K.DGTFIYFE Splice@chr | 2.27E-10 | 0.005798 |
| 1Mar2011- | 15547 | 1009.49 | -7.44413 | 2 K.DGTFIYFE Splice@chr | 2.83E-10 | 0.007698 |
| 1Mar2011- | 16282 | 1009.49 | -7.44413 | 2 K.DGTFIYFE Splice@chr | 3.38E-10 | 0.008988 |
| 1Mar2011- | 16075 | 1009.48 | -17.3696 | 2 K.DGTFIYFE Splice@chr | 1.00E-10 | 0.002337 |
| 1Mar2011- | 16022 | 1009.48 | -17.3696 | 2 K.DGTFIYFE Splice@chr | 2.00E-11 | 9.49E-04 |
| 1Mar2011- | 15965 | 1009.48 | -17.3696 | 2 K.DGTFIYFE Splice@chr | 9.20E-11 | 0.002098 |
| 1Mar2011- | 14348 | 1009.48 | -17.3696 | 2 K.DGTFIYFE Splice@chr | 1.82E-10 | 0.005352 |
| 1Mar2011- | 14294 | 1009.49 | -7.44413 | 2 K.DGTFIYFE Splice@chr | 1.93E-10 | 0.005482 |
| 1Mar2011- | 14406 | 1009.48 | -17.3696 | 2 K.DGTFIYFE Splice@chr | 3.64E-11 | 0.001018 |
| 1Mar2011- | 15092 | 1009.49 | -7.44413 | 2 K.DGTFIYFE Splice@chr | 2.50E-10 | 0.007384 |
| 1Mar2011- | 14857 | 1009.49 | -7.44413 | 2 K.DGTFIYFE Splice@chr | 6.85E-11 | 0.003279 |

|            |       |         |          |                         |          |          |
|------------|-------|---------|----------|-------------------------|----------|----------|
| 1Mar2011-  | 15201 | 1009.48 | -17.3696 | 2 K.DGTFIYFE Splice@chr | 7.13E-11 | 0.003375 |
| 1Mar2011-  | 13033 | 1009.49 | -7.44413 | 2 K.DGTFIYFE Splice@chr | 2.49E-11 | 9.29E-04 |
| 1Mar2011-  | 13087 | 1009.49 | -7.44413 | 2 K.DGTFIYFE Splice@chr | 1.98E-10 | 0.004698 |
| 1Mar2011-  | 11607 | 1009.49 | -7.44413 | 2 K.DGTFIYFE Splice@chr | 2.12E-10 | 0.005346 |
| 1Mar2011-  | 11760 | 1009.49 | -7.44413 | 2 K.DGTFIYFE Splice@chr | 3.61E-10 | 0.009357 |
| 1Mar2011-  | 12696 | 1009.49 | -7.44413 | 2 K.DGTFIYFE Splice@chr | 1.69E-11 | 3.38E-04 |
| 1Mar2011-  | 11815 | 1009.49 | -7.44413 | 2 K.DGTFIYFE Splice@chr | 1.04E-10 | 0.004306 |
| 1Mar2011-  | 11978 | 1009.49 | -7.44413 | 2 K.DGTFIYFE Splice@chr | 2.40E-10 | 0.00751  |
| 1Mar2011-  | 11923 | 1009.49 | -7.44413 | 2 K.DGTFIYFE Splice@chr | 8.96E-11 | 0.003654 |
| 1Mar2011-  | 11322 | 1009.49 | -7.44413 | 2 K.DGTFIYFE Splice@chr | 3.88E-11 | 0.001628 |
| 19July2011 | 4151  | 709.7   | 18.98624 | 3 K.M+15.99 chrX@8990   | 5.05E-12 | 2.90E-04 |
| 19July2011 | 7818  | 741.42  | -2.39069 | 3 _M+15.99 Splice@chr   | 1.35E-10 | 0.004398 |
| 1Mar2011-  | 13315 | 594.34  | 6.005286 | 3 R.ITGNLNA chr1@8586   | 3.95E-10 | 0.009232 |
| 1Mar2011-  | 18294 | 1173.62 | -12.887  | 2 K.SK+14.01 Splice@chr | 3.90E-10 | 0.009052 |
| 1Mar2011-  | 18340 | 1173.61 | -21.4268 | 2 K.SK+14.01 Splice@chr | 3.08E-10 | 0.007338 |
| 19July2011 | 10914 | 705.39  | -27.0343 | 4 _LCFYLNLC chr2@1225   | 3.24E-10 | 0.006418 |
| 19July2011 | 5442  | 627.02  | 15.79498 | 3 K.NEIDKNI chr1@8506   | 3.95E-10 | 0.006397 |
| 19July2011 | 5950  | 441.58  | -12.3757 | 3 K.HMKFLYI chr3@4480   | 2.03E-10 | 0.006568 |
| 1Mar2011-  | 9228  | 932.51  | -10.3089 | 3 _GSRQSVF chr5@1690    | 3.49E-10 | 0.007603 |
| 1Mar2011-  | 3252  | 628.87  | 19.63702 | 2 R.KSRKDTE Splice@chr  | 2.94E-10 | 0.008738 |
| 19July2011 | 8704  | 804.42  | -15.1938 | 3 K.LESKFNKI chr2@5866  | 4.52E-10 | 0.008125 |
| 19July2011 | 13441 | 570.66  | 22.90846 | 3 K.RLIWRIM chr5@5086   | 1.03E-10 | 0.003069 |
| 1Mar2011-  | 20903 | 879.94  | -7.34497 | 4 K.LVSANCD chr5@3581   | 2.48E-10 | 0.005387 |
| 1Mar2011-  | 13446 | 1180.28 | 15.18218 | 3 E.EMK+14.1 chr4@8277  | 1.74E-10 | 0.005314 |
| 1Mar2011-  | 17040 | 735.39  | 18.06307 | 4 K.VQNHNL chr5@1186    | 2.94E-10 | 0.007636 |
| 1Mar2011-  | 3209  | 1083.56 | 8.457191 | 1 K.FKMSSNI chrX@3194   | 1.24E-10 | 0.00252  |
| 1Mar2011-  | 2678  | 1083.56 | 8.457191 | 1 K.FKMSSNI chrX@3194   | 2.57E-10 | 0.006885 |
| 1Mar2011-  | 2771  | 1083.56 | 8.457191 | 1 K.FKMSSNI chrX@3194   | 7.62E-11 | 0.002493 |
| 1Mar2011-  | 2152  | 1083.56 | 8.457191 | 1 K.FKMSSNI chrX@3194   | 2.95E-10 | 0.007366 |
| 1Mar2011-  | 3134  | 1083.57 | 17.59096 | 1 K.FKMSSNI chrX@3194   | 1.91E-10 | 0.003031 |
| 1Mar2011-  | 2262  | 1083.56 | 8.457191 | 1 K.FKMSSNI chrX@3194   | 2.38E-10 | 0.00751  |
| 1Mar2011-  | 2368  | 1083.56 | 8.457191 | 1 K.FKMSSNI chrX@3194   | 1.32E-10 | 0.005    |
| 1Mar2011-  | 2621  | 1083.57 | 17.59096 | 1 K.FKMSSNI chrX@3194   | 6.02E-11 | 0.001817 |
| 1Mar2011-  | 13176 | 909.82  | 19.82046 | 3 R.LPK+14.0 Splice@chr | 3.33E-10 | 0.008824 |
| 1Mar2011-  | 14909 | 1056.22 | 17.06965 | 3 K.CALVFKIF chr5@1735  | 2.97E-10 | 0.007759 |
| 19July2011 | 1649  | 424.24  | -19.0971 | 3 R.QIAQRGE chr5@2036   | 1.94E-10 | 0.004881 |
| 1Mar2011-  | 11706 | 1075.01 | -4.51905 | 2 R.RSGNML Splice@chr   | 3.48E-10 | 0.00855  |
| 1Mar2011-  | 14895 | 1182.12 | 2.198077 | 2 K.EQM+15. chrX@1645   | 1.93E-10 | 0.005819 |
| 19July2011 | 6825  | 999     | -4.43509 | 2 K.SK+14.01 chr1@3550  | 5.68E-11 | 0.002439 |
| 1Mar2011-  | 6767  | 728.44  | -22.6538 | 2 R.IFKILPKN chr5@5215  | 2.90E-10 | 0.008756 |
| 1Mar2011-  | 7443  | 634.83  | 21.34882 | 2 R.NNK+14.1 chr5@9766  | 1.04E-10 | 0.002368 |
| 1Mar2011-  | 9765  | 695.41  | 0.133485 | 2 K.SRSKAER chrX@6714   | 1.92E-10 | 0.005826 |
| 1Mar2011-  | 10144 | 695.41  | 0.133485 | 2 K.SRSKAER chrX@6714   | 1.82E-10 | 0.004201 |
| 19July2011 | 5878  | 518.59  | 18.68504 | 3 K.FQIFPGS chrX@1636   | 4.61E-10 | 0.008728 |
| 1Mar2011-  | 9056  | 525.28  | -13.6208 | 2 _KTDADKII chr4@1537   | 6.82E-11 | 0.001788 |
| 1Mar2011-  | 9039  | 715.9   | 18.58433 | 2 R.TK+14.01 chrX@6825  | 1.89E-10 | 0.004112 |
| 1Mar2011-  | 8937  | 489.28  | 12.41705 | 3 _LLTICSNR Splice@chr  | 5.18E-10 | 0.008794 |

|            |       |         |          |                        |          |          |
|------------|-------|---------|----------|------------------------|----------|----------|
| 1Mar2011-  | 15675 | 1193.66 | -6.95989 | 1 K.NFIAIFLN chr3@8087 | 2.29E-10 | 0.006957 |
| 1Mar2011-  | 4769  | 514.57  | -29.372  | 3 R.GGRSSSR Splice@chr | 1.00E-10 | 0.002409 |
| 1Mar2011-  | 5846  | 514.57  | -29.372  | 3 R.GGRSSSR Splice@chr | 3.80E-10 | 0.008842 |
| 19July2011 | 6371  | 801.42  | -27.6797 | 2 R.VENTDAL chr5@2055  | 4.68E-10 | 0.008762 |
| 19July2011 | 11803 | 859.95  | -0.99482 | 2 K.KFNK+14 chr1@1264  | 3.12E-10 | 0.007353 |
| 1Mar2011-  | 13760 | 874.98  | 2.234773 | 2 _NRQTKILI chr1@1255  | 1.68E-10 | 0.003165 |
| 19July2011 | 8526  | 666.34  | -28.8044 | 4 K.M+15.99 chrX@5752  | 4.35E-10 | 0.007459 |
| 1Mar2011-  | 12515 | 885.99  | -21.0799 | 2 K.DKKDRKM chr3@1208  | 3.18E-10 | 0.006457 |
| 1Mar2011-  | 11119 | 780.03  | -9.90125 | 3 P.QTCWKV chr3@9422   | 1.97E-10 | 0.004497 |
| 1Mar2011-  | 15012 | 982.54  | -24.2934 | 2 K.NGKKK+1 chr2@1355  | 2.64E-10 | 0.007166 |
| 19July2011 | 694   | 408.75  | 11.15207 | 2 R.LSEIAGV chrX@4709  | 1.61E-10 | 0.004948 |
| 1Mar2011-  | 12121 | 772.82  | 5.648391 | 5 K.LEHK+14. chr4@4505 | 8.77E-11 | 0.002885 |
| 1Mar2011-  | 8940  | 812.77  | 6.115366 | 3 K.KFELMSC chrX@6985  | 1.55E-10 | 0.004497 |
| 1Mar2011-  | 10839 | 884.91  | -24.5601 | 2 R.QNCTHPI chr3@3662  | 3.33E-10 | 0.008525 |
| 1Mar2011-  | 6206  | 805.37  | -0.27745 | 3 R.AFQM+1. Splice@chr | 2.58E-13 | 0        |
| 1Mar2011-  | 6260  | 805.37  | -0.27745 | 3 R.AFQM+1. Splice@chr | 1.41E-12 | 0        |
| 1Mar2011-  | 6030  | 805.37  | -0.27745 | 3 R.AFQM+1. Splice@chr | 3.60E-13 | 0        |
| 1Mar2011-  | 17018 | 948.01  | 4.382681 | 2 _SVQWPA Splice@chr   | 4.21E-10 | 0.00872  |
| 19July2011 | 9997  | 595.3   | 17.93892 | 5 R.HYK+14.( chr4@1169 | 1.36E-10 | 0.002623 |
| 1Mar2011-  | 929   | 615.38  | 12.319   | 2 K.NQKNIFL Splice@chr | 1.90E-10 | 0.005104 |
| 19July2011 | 12627 | 971.86  | 8.047118 | 3 W.FWK+14 chr5@1529   | 4.12E-11 | 0.001427 |
| 1Mar2011-  | 3650  | 524.25  | -28.8112 | 2 K.ESWKND chr3@2664   | 7.08E-11 | 0.001591 |
| 19July2011 | 3703  | 569.29  | -6.22933 | 2 R.PESEPEPI chr1@1165 | 3.25E-10 | 0.008077 |
| 1Mar2011-  | 13638 | 981.53  | 25.50519 | 2 K.LLM+15.5 chr5@1489 | 9.22E-11 | 0.001361 |
| 19July2011 | 11561 | 696.33  | -23.7585 | 3 K.AFQFSDK chr3@4407  | 2.69E-10 | 0.007132 |
| 1Mar2011-  | 11729 | 509.29  | -12.1681 | 3 R.RHRSLH chr1@1400   | 2.19E-10 | 0.005552 |
| 1Mar2011-  | 11901 | 509.29  | -12.1681 | 3 R.RHRSLH chr1@1400   | 2.20E-10 | 0.005057 |
| 1Mar2011-  | 20495 | 1143.71 | -1.14794 | 2 _VVELEGL Splice@chr  | 3.13E-11 | 6.72E-04 |
| 1Mar2011-  | 19994 | 1143.71 | -1.14794 | 2 _VVELEGL Splice@chr  | 1.23E-10 | 0.003174 |
| 1Mar2011-  | 18847 | 1143.71 | -1.14794 | 2 _VVELEGL Splice@chr  | 6.84E-11 | 0.001684 |
| 1Mar2011-  | 17866 | 1143.72 | 7.615627 | 2 _VVELEGL Splice@chr  | 1.03E-10 | 0.003644 |
| 1Mar2011-  | 17518 | 1143.71 | -1.14794 | 2 _VVELEGL Splice@chr  | 2.15E-10 | 0.007551 |
| 1Mar2011-  | 16570 | 1143.71 | -1.14794 | 2 _VVELEGL Splice@chr  | 1.34E-10 | 0.00445  |
| 1Mar2011-  | 16450 | 1143.72 | 7.615627 | 2 _VVELEGL Splice@chr  | 5.19E-11 | 0.00165  |
| 1Mar2011-  | 19863 | 1143.72 | 7.615627 | 2 _VVELEGL Splice@chr  | 1.56E-10 | 0.003829 |
| 1Mar2011-  | 19699 | 1143.72 | 7.615627 | 2 _VVELEGL Splice@chr  | 3.03E-10 | 0.007583 |
| 1Mar2011-  | 19819 | 1143.71 | -1.14794 | 2 _VVELEGL Splice@chr  | 3.35E-10 | 0.008881 |
| 1Mar2011-  | 20235 | 1143.71 | -1.14794 | 2 _VVELEGL Splice@chr  | 1.34E-10 | 0.002898 |
| 1Mar2011-  | 16361 | 1143.71 | -1.14794 | 2 _VVELEGL Splice@chr  | 1.22E-10 | 0.003817 |
| 1Mar2011-  | 16900 | 1143.71 | -1.14794 | 2 _VVELEGL Splice@chr  | 3.49E-10 | 0.00855  |
| 1Mar2011-  | 15918 | 1143.71 | -1.14794 | 2 _VVELEGL Splice@chr  | 4.47E-10 | 0.009226 |
| 1Mar2011-  | 15447 | 1143.71 | -1.14794 | 2 _VVELEGL Splice@chr  | 1.93E-10 | 0.006892 |
| 1Mar2011-  | 15291 | 1143.71 | -1.14794 | 2 _VVELEGL Splice@chr  | 2.82E-10 | 0.008964 |
| 1Mar2011-  | 15417 | 1143.71 | -1.14794 | 2 _VVELEGL Splice@chr  | 1.96E-10 | 0.007046 |
| 1Mar2011-  | 11716 | 876.49  | 7.459673 | 2 K.FGRKLSE Splice@chr | 1.27E-10 | 0.003732 |
| 1Mar2011-  | 10451 | 596.31  | -3.43577 | 2 R.RETTNSD chr2@2685  | 8.10E-11 | 0.002793 |
| 1Mar2011-  | 12684 | 968.99  | -23.3925 | 2 K.FSKNKIW chr2@1384  | 1.80E-10 | 0.004267 |

|            |       |        |          |                          |          |          |
|------------|-------|--------|----------|--------------------------|----------|----------|
| 19July2011 | 4812  | 615.35 | 26.14525 | 3 R.RK+14.01 chr5@1275   | 4.56E-10 | 0.007238 |
| 1Mar2011-  | 10890 | 724.88 | -27.2934 | 2 R.WLVLTRF chr2@1128    | 2.29E-10 | 0.004925 |
| 1Mar2011-  | 166   | 517.3  | 25.62188 | 2 R.KKNEMLI Splice@chr   | 1.13E-10 | 0.001936 |
| 19July2011 | 4624  | 609.83 | -15.2379 | 2 R.RWTTETF chr3@1254    | 5.08E-11 | 0.003599 |
| 19July2011 | 7237  | 648.01 | -13.081  | 3 _..NKNVSK+ chrX@2865   | 3.13E-10 | 0.008943 |
| 19July2011 | 12893 | 847.75 | -21.1437 | 3 R.IFSRLERF chr3@6858   | 2.09E-10 | 0.006568 |
| 19July2011 | 7317  | 936.97 | -11.9714 | 2 R.EM+15.9 chr5@3450    | 2.56E-10 | 0.009925 |
| 1Mar2011-  | 3735  | 539.6  | -11.7855 | 3 R.ASDANNI chr1@1019    | 1.03E-10 | 0.002182 |
| 19July2011 | 10122 | 601.68 | -24.3184 | 3 _..IITRTRIIF chr2@2109 | 5.12E-11 | 0.001866 |
| 1Mar2011-  | 15667 | 936.51 | 1.109136 | 2 K.K+14.016 chr2@7967   | 1.60E-10 | 0.003512 |
| 1Mar2011-  | 16110 | 936.51 | 1.109136 | 2 K.K+14.016 chr2@7967   | 2.29E-10 | 0.004624 |
| 1Mar2011-  | 19420 | 936.52 | 11.80903 | 2 K.K+14.016 chr2@7967   | 6.87E-11 | 0.001759 |
| 1Mar2011-  | 1625  | 510.78 | 4.430039 | 2 L.TYATQLP, chr1@1227   | 9.72E-11 | 0.001921 |
| 1Mar2011-  | 1709  | 510.78 | 4.430039 | 2 L.TYATQLP, chr1@1227   | 2.33E-10 | 0.006264 |
| 1Mar2011-  | 1650  | 510.78 | 4.430039 | 2 L.TYATQLP, chr1@1227   | 1.89E-10 | 0.004247 |
| 1Mar2011-  | 1124  | 480.28 | -28.2982 | 2 R.LVNMGA chr3@2408     | 2.55E-10 | 0.005015 |
| 1Mar2011-  | 5260  | 535.32 | 0.304617 | 3 R.QMFK+1, chr4@9299    | 3.97E-10 | 0.008973 |
| 1Mar2011-  | 13635 | 592.65 | -17.7868 | 3 K.TITLLQES chrX@1140   | 3.31E-10 | 0.007678 |
| 1Mar2011-  | 11600 | 592.65 | -17.7868 | 3 K.TITLLQES chrX@1140   | 4.83E-11 | 0.001357 |
| 1Mar2011-  | 10469 | 592.65 | -17.7868 | 3 K.TITLLQES chrX@1140   | 1.49E-11 | 4.04E-04 |
| 1Mar2011-  | 4968  | 439.91 | -4.82084 | 3 K.FYK+14.0 chr1@1305   | 2.18E-10 | 0.005236 |
| 1Mar2011-  | 6318  | 439.91 | -4.82084 | 3 K.FYK+14.0 chr1@1305   | 2.60E-10 | 0.008169 |
| 19July2011 | 8390  | 810.09 | 16.02567 | 3 R.TVM+15. chr2@8177    | 1.61E-10 | 0.003857 |
| 1Mar2011-  | 16056 | 867.99 | 28.91782 | 2 R.FKDLRDD chr5@6445    | 1.24E-10 | 0.004021 |
| 19July2011 | 8534  | 785.4  | 21.08751 | 2 K.WTCK+14 chrX@2900    | 2.51E-10 | 0.005727 |
| 1Mar2011-  | 11530 | 697.03 | 14.53576 | 3 K.VM+15.9 chr5@1396    | 1.59E-10 | 0.004287 |
| 19July2011 | 484   | 442.25 | -26.212  | 2 _..FPAPARP chr5@2756   | 1.59E-10 | 0.003623 |
| 19July2011 | 2594  | 603.31 | -27.3601 | 2 I.LKMESDEI Splice@chr  | 4.31E-10 | 0.007459 |
| 19July2011 | 16170 | 701.34 | 8.599044 | 3 R.EFSGPSK, chr1@1085   | 3.07E-10 | 0.006482 |
| 19July2011 | 9856  | 733.03 | 22.49625 | 3 R.DIREAEM Splice@chr   | 4.24E-10 | 0.007041 |
| 1Mar2011-  | 13709 | 890.43 | -27.4286 | 2 D.YFK+14.C Splice@chr  | 4.25E-11 | 0.001176 |
| 1Mar2011-  | 16412 | 981    | -4.14271 | 2 E.DTFFWKI chr1@1282    | 3.01E-10 | 0.009036 |
| 1Mar2011-  | 19128 | 874.12 | 15.00656 | 3 R.FCVKNCE chr4@1408    | 1.96E-10 | 0.004846 |
| 1Mar2011-  | 19088 | 874.12 | 15.00656 | 3 R.FCVKNCE chr4@1408    | 2.88E-10 | 0.006152 |
| 19July2011 | 9038  | 868.95 | -29.3742 | 2 R.ARQFISIS chrX@1537   | 2.20E-10 | 0.004852 |
| 19July2011 | 12103 | 472.47 | -26.1953 | 4 K.WSYSNLF chr3@1475    | 3.26E-10 | 0.009391 |
| 19July2011 | 3271  | 539.29 | -23.8111 | 2 R.M+15.99 chr2@8684    | 3.27E-10 | 0.005822 |
| 1Mar2011-  | 18867 | 891.49 | -2.35334 | 3 _..NFSNKVK chrX@6170   | 3.75E-10 | 0.008008 |
| 1Mar2011-  | 996   | 419.24 | 6.869848 | 2 _..HLPASSPI chr2@3275  | 1.41E-10 | 0.003344 |
| 1Mar2011-  | 806   | 419.24 | 6.869848 | 2 _..HLPASSPI chr2@3275  | 3.35E-11 | 0.00162  |
| 1Mar2011-  | 905   | 419.24 | 6.869848 | 2 _..HLPASSPI chr2@3275  | 8.61E-11 | 0.003714 |
| 1Mar2011-  | 824   | 419.24 | 6.869848 | 2 _..HLPASSPI chr2@3275  | 8.62E-11 | 0.003714 |
| 1Mar2011-  | 848   | 419.24 | 6.869848 | 2 _..HLPASSPI chr2@3275  | 3.35E-11 | 0.00162  |
| 1Mar2011-  | 1360  | 419.24 | 6.869848 | 2 _..HLPASSPI chr2@3275  | 2.32E-10 | 0.004537 |
| 1Mar2011-  | 1226  | 419.24 | 6.869848 | 2 _..HLPASSPI chr2@3275  | 4.79E-10 | 0.008952 |
| 1Mar2011-  | 20533 | 854.88 | 2.859226 | 5 R.TNVFSLTI Splice@chr  | 3.05E-10 | 0.008485 |
| 1Mar2011-  | 15518 | 768.82 | 16.03912 | 3 P.IRK+14.0 chrX@3008   | 3.59E-11 | 0.00162  |

|            |       |         |          |                          |          |          |
|------------|-------|---------|----------|--------------------------|----------|----------|
| 19July2011 | 5934  | 633.01  | -8.14755 | 3 _._AK+14.01 chr4@3256  | 1.45E-11 | 0.001058 |
| 1Mar2011-  | 7497  | 938.54  | 11.40747 | 1 R.FVVVFGN Splice@chr   | 1.25E-10 | 0.003061 |
| 19July2011 | 6668  | 925.58  | 5.92225  | 3 _._NLK+14.C Splice@chr | 1.19E-10 | 0.004002 |
| 1Mar2011-  | 9860  | 839.44  | -2.43887 | 2 K.M+15.99 chr2@1448    | 1.06E-10 | 0.002409 |
| 19July2011 | 9565  | 504.78  | 6.126659 | 2 R.WENFRKI chr2@2643    | 3.24E-10 | 0.007933 |
| 1Mar2011-  | 6430  | 1051.64 | 15.87705 | 1 K.YITNILSVI chr4@5906  | 3.22E-10 | 0.008191 |
| 1Mar2011-  | 14980 | 625.7   | -10.9801 | 3 K.RSLISNLY chr1@5925   | 1.43E-10 | 0.002924 |
| 19July2011 | 9990  | 1142.56 | -24.5941 | 2 K.SPSK+14. chr4@1348   | 2.21E-10 | 0.006371 |
| 1Mar2011-  | 9796  | 1053.06 | -15.177  | 2 R.RRWRM\ Splice@chr    | 2.36E-10 | 0.005636 |
| 19July2011 | 10461 | 843.08  | -29.2819 | 3 R.LSAGANS chr5@1343    | 9.30E-11 | 0.002596 |
| 1Mar2011-  | 1544  | 432.25  | -21.0173 | 2 N.HILGAAG chrX@1230    | 3.63E-10 | 0.00894  |
| 1Mar2011-  | 1359  | 432.25  | -21.0173 | 2 N.HILGAAG chrX@1230    | 3.06E-10 | 0.007985 |
| 1Mar2011-  | 1058  | 432.25  | -21.0173 | 2 N.HILGAAG chrX@1230    | 3.19E-10 | 0.009917 |
| 19July2011 | 12956 | 658.37  | 6.36666  | 2 K.VCIKNPN chr5@1687    | 2.55E-10 | 0.007572 |
| 19July2011 | 11268 | 809.18  | 11.95595 | 4 K.YGSRST chr5@1102     | 7.10E-11 | 0.002819 |
| 1Mar2011-  | 15391 | 1027.54 | -26.6185 | 2 R.LVFGENL chr3@1228    | 2.55E-10 | 0.004782 |
| 1Mar2011-  | 10367 | 657.83  | 15.54869 | 4 K.VETNGK+ chr4@1488    | 2.80E-10 | 0.005263 |
| 19July2011 | 1866  | 554.3   | 14.26731 | 3 R.AHLHQC/ chr2@1219    | 4.45E-10 | 0.007238 |
| 19July2011 | 5110  | 569.29  | -27.224  | 5 _._K+14.016 Splice@chr | 4.43E-10 | 0.008243 |
| 1Mar2011-  | 14973 | 890.93  | -20.095  | 2 R.ITPPNRQ Splice@chr   | 3.40E-10 | 0.008261 |
| 1Mar2011-  | 1404  | 557.83  | 10.30376 | 2 R.QICRTPL\ chr5@4974   | 3.05E-11 | 9.62E-04 |
| 19July2011 | 9733  | 671.67  | 8.494086 | 3 R.TYYNVRF chr3@1032    | 8.34E-11 | 0.00275  |
| 19July2011 | 933   | 494.27  | -9.59717 | 2 _._IVQEGER chr5@1767   | 2.88E-10 | 0.007022 |
| 1Mar2011-  | 12133 | 825.95  | -2.44157 | 2 P.RASVKTS chrX@6857    | 2.70E-10 | 0.007046 |
| 1Mar2011-  | 14179 | 825.95  | -2.44157 | 2 P.RASVKTS chrX@6857    | 3.77E-10 | 0.008842 |
| 1Mar2011-  | 15288 | 1076.6  | 20.88283 | 2 Q.RQLHARI Splice@chr   | 7.01E-11 | 0.001147 |
| 1Mar2011-  | 14227 | 572.3   | 13.99585 | 4 _._RAECTSY\ Splice@chr | 3.67E-11 | 0.001453 |
| 1Mar2011-  | 15294 | 1010.99 | 6.043228 | 2 K.HQGCTSI chr4@1250    | 1.68E-10 | 0.005065 |
| 19July2011 | 10241 | 777.75  | 1.152485 | 3 R.KM+15.9 chr4@5183    | 3.94E-10 | 0.00933  |
| 1Mar2011-  | 8424  | 939.02  | -4.74999 | 2 R.HPYFNTF Splice@chr   | 2.19E-10 | 0.005148 |
| 1Mar2011-  | 11459 | 555.94  | -27.2026 | 3 K.ISKTRGSF Splice@chr  | 2.77E-10 | 0.007513 |
| 1Mar2011-  | 1012  | 429.25  | 28.96983 | 2 R.QNVGVSI chr2@2599    | 2.51E-10 | 0.007435 |
| 1Mar2011-  | 16360 | 499.27  | 5.02525  | 5 K.VIFLYGDF chr5@1608   | 3.95E-10 | 0.00982  |
| 1Mar2011-  | 18645 | 810.11  | 0.502905 | 3 _._VLCEK+1\ chr2@1198  | 9.88E-11 | 0.001889 |
| 1Mar2011-  | 19045 | 810.45  | 7.368437 | 3 _._VLCEK+1\ chr2@1198  | 2.30E-11 | 7.52E-04 |
| 1Mar2011-  | 18764 | 810.46  | 19.73989 | 3 _._VLCEK+1\ chr2@1198  | 3.87E-10 | 0.009112 |
| 1Mar2011-  | 17939 | 810.45  | 7.368437 | 3 _._VLCEK+1\ chr2@1198  | 3.81E-10 | 0.007773 |
| 1Mar2011-  | 17918 | 810.45  | 7.368437 | 3 _._VLCEK+1\ chr2@1198  | 4.17E-10 | 0.009023 |
| 1Mar2011-  | 19514 | 810.12  | 12.77378 | 3 _._VLCEK+1\ chr2@1198  | 1.35E-10 | 0.005274 |
| 19July2011 | 10269 | 1058.89 | 22.30947 | 3 R.LSHCPSTI chrX@4550   | 2.51E-10 | 0.005677 |
| 1Mar2011-  | 16810 | 937.08  | -14.0838 | 3 R.CRM+15. Splice@chr   | 6.78E-11 | 0.00187  |
| 1Mar2011-  | 17097 | 937.08  | -14.0838 | 3 R.CRM+15. Splice@chr   | 1.35E-10 | 0.003002 |
| 1Mar2011-  | 15745 | 1012.51 | 6.637565 | 4 K.KLQFTCK chr5@1567    | 1.48E-11 | 6.64E-04 |
| 19July2011 | 7485  | 505.25  | -22.5942 | 3 R.LSSSSALS chr1@1137   | 7.92E-11 | 0.001768 |
| 1Mar2011-  | 2824  | 441.25  | 12.28622 | 2 R.IVESGTF\ chr2@7194   | 1.88E-10 | 0.005271 |
| 19July2011 | 9853  | 744.88  | 9.706572 | 4 K.KIDPDQDV chr5@7644   | 1.09E-10 | 0.002149 |
| 1Mar2011-  | 15106 | 785.39  | 4.279735 | 1 K.MTSAYAI chr5@1859    | 4.25E-11 | 8.73E-04 |

|            |       |         |          |                          |          |          |
|------------|-------|---------|----------|--------------------------|----------|----------|
| 19July2011 | 3321  | 649.34  | -23.9541 | 3 K.IIPKKSKN chr5@1861   | 1.99E-10 | 0.005642 |
| 1Mar2011-  | 6808  | 742.39  | -26.9199 | 1 _._VNGEVPk chr3@2638   | 1.06E-10 | 0.003167 |
| 1Mar2011-  | 16347 | 936.52  | 8.024892 | 2 K.QK+14.0: chr2@1075   | 2.58E-10 | 0.006291 |
| 1Mar2011-  | 14532 | 936.53  | 18.72475 | 2 K.QK+14.0: chr2@1075   | 3.97E-10 | 0.008206 |
| 1Mar2011-  | 20675 | 998.5   | 24.82616 | 2 R.YRK+14.C chr2@1412   | 2.97E-10 | 0.007918 |
| 1Mar2011-  | 9587  | 665.89  | 0.323152 | 2 _._ISYFK+14 chr4@7815  | 1.09E-10 | 0.002467 |
| 1Mar2011-  | 13886 | 727.39  | 6.097627 | 2 R.LTRGYGT chr2@1195    | 4.13E-10 | 0.00969  |
| 1Mar2011-  | 9381  | 763.41  | -5.80647 | 2 _._PQK+14.( chr4@1231  | 1.68E-10 | 0.003495 |
| 19July2011 | 1255  | 601.29  | -26.5032 | 3 R.YNGGKN chr1@7975     | 2.42E-10 | 0.006229 |
| 1Mar2011-  | 17210 | 940.44  | -19.7275 | 2 L.K+14.016 chr3@1105   | 1.60E-10 | 0.004129 |
| 1Mar2011-  | 16409 | 940.44  | -19.7275 | 2 L.K+14.016 chr3@1105   | 3.32E-10 | 0.00916  |
| 1Mar2011-  | 14256 | 940.44  | -19.7275 | 2 L.K+14.016 chr3@1105   | 1.14E-10 | 0.004342 |
| 1Mar2011-  | 15053 | 940.44  | -19.7275 | 2 L.K+14.016 chr3@1105   | 1.70E-10 | 0.0052   |
| 1Mar2011-  | 14670 | 940.44  | -19.7275 | 2 L.K+14.016 chr3@1105   | 8.05E-11 | 0.001386 |
| 1Mar2011-  | 16023 | 940.44  | -19.7275 | 2 L.K+14.016 chr3@1105   | 6.03E-11 | 0.002057 |
| 1Mar2011-  | 16307 | 940.44  | -19.7275 | 2 L.K+14.016 chr3@1105   | 2.72E-10 | 0.006552 |
| 1Mar2011-  | 16251 | 940.44  | -19.7275 | 2 L.K+14.016 chr3@1105   | 2.31E-10 | 0.005998 |
| 1Mar2011-  | 16243 | 940.44  | -19.7275 | 2 L.K+14.016 chr3@1105   | 2.27E-10 | 0.005798 |
| 19July2011 | 10542 | 711.06  | -25.3285 | 3 K.YFYQKVG chr3@1154    | 1.46E-10 | 0.004948 |
| 1Mar2011-  | 189   | 454.26  | 22.01747 | 2 R.GITTKME chr4@7815    | 7.76E-11 | 0.002754 |
| 1Mar2011-  | 2563  | 460.93  | -7.78545 | 3 I.LKK+14.0: chr4@5904  | 4.65E-10 | 0.009152 |
| 1Mar2011-  | 14117 | 749.89  | 18.69159 | 4 K.WVIQGIV chr3@3925    | 1.31E-10 | 0.00306  |
| 1Mar2011-  | 15258 | 749.89  | 18.69159 | 4 K.WVIQGIV chr3@3925    | 1.49E-10 | 0.003391 |
| 1Mar2011-  | 11205 | 749.89  | 18.69159 | 4 K.WVIQGIV chr3@3925    | 1.71E-11 | 0.001175 |
| 1Mar2011-  | 8525  | 776.44  | 8.625909 | 2 K.NYRKISNI chr1@5680   | 3.33E-10 | 0.008409 |
| 1Mar2011-  | 16193 | 1139.6  | 19.94176 | 2 K.SPYHLPF/ Splice@chr  | 3.52E-10 | 0.00742  |
| 19July2011 | 14637 | 684.01  | -3.81281 | 3 K.CNFNFKE chr2@1504    | 3.87E-10 | 0.008322 |
| 19July2011 | 8602  | 605.33  | 23.9707  | 3 K.NGSVDS\ Splice@chr   | 3.71E-10 | 0.006633 |
| 1Mar2011-  | 6619  | 575.67  | 1.416142 | 3 K.SLF SMK+ chr3@1135   | 3.05E-10 | 0.007509 |
| 1Mar2011-  | 11405 | 839.94  | 25.31882 | 4 I.WFIKQGA chr2@7444    | 3.82E-10 | 0.008101 |
| 19July2011 | 10666 | 774.42  | -19.7007 | 2 K.FQVISSE\ chr3@7705   | 6.50E-11 | 0.001746 |
| 19July2011 | 584   | 402.22  | 15.51718 | 2 _._VGAQMA Splice@chr   | 8.55E-11 | 0.004535 |
| 19July2011 | 632   | 402.22  | 15.51718 | 2 _._VGAQMA Splice@chr   | 1.36E-10 | 0.004398 |
| 1Mar2011-  | 17419 | 726.1   | -7.05137 | 4 K.AVPFVPI\ Splice@chr  | 9.58E-11 | 0.00204  |
| 19July2011 | 9336  | 584.79  | -29.3636 | 4 _._INK+14.0 chr5@6120  | 2.36E-10 | 0.007547 |
| 1Mar2011-  | 19269 | 654.73  | 18.71526 | 3 L.IILSSTTLR Splice@chr | 4.01E-10 | 0.009319 |
| 19July2011 | 4236  | 441.91  | 26.21056 | 3 R.LPDSSK+ chr4@1226    | 1.81E-10 | 0.006465 |
| 1Mar2011-  | 12162 | 900.8   | -14.9051 | 3 R.SRFGILKF chr5@6845   | 1.45E-10 | 0.003067 |
| 1Mar2011-  | 11811 | 900.8   | -14.9051 | 3 R.SRFGILKF chr5@6845   | 3.95E-10 | 0.009686 |
| 19July2011 | 5729  | 636.87  | -17.2775 | 2 K.RNFAISAI chr3@8175   | 2.97E-10 | 0.006442 |
| 1Mar2011-  | 14607 | 1090.55 | 8.013909 | 3 S.DFFPTEQ Splice@chr   | 4.03E-17 | 0        |
| 1Mar2011-  | 14647 | 818.16  | 2.484952 | 4 S.DFFPTEQ Splice@chr   | 2.30E-16 | 0        |
| 1Mar2011-  | 13595 | 818.17  | 14.73832 | 4 S.DFFPTEQ Splice@chr   | 1.67E-10 | 0.005314 |
| 1Mar2011-  | 14654 | 1090.54 | -1.17611 | 3 S.DFFPTEQ Splice@chr   | 1.08E-15 | 0        |
| 1Mar2011-  | 15576 | 1090.54 | -1.17611 | 3 S.DFFPTEQ Splice@chr   | 4.43E-13 | 0        |
| 1Mar2011-  | 15483 | 1090.54 | -1.17611 | 3 S.DFFPTEQ Splice@chr   | 1.13E-13 | 0        |
| 1Mar2011-  | 14508 | 1090.55 | 8.013909 | 3 S.DFFPTEQ Splice@chr   | 3.50E-11 | 5.75E-04 |

|            |       |         |          |                          |          |          |
|------------|-------|---------|----------|--------------------------|----------|----------|
| 1Mar2011-  | 14136 | 1090.55 | 8.013909 | 3 S.DFFPTEQ Splice@chr   | 2.56E-15 | 0        |
| 1Mar2011-  | 15524 | 1090.55 | 8.013909 | 3 S.DFFPTEQ Splice@chr   | 5.24E-14 | 0        |
| 1Mar2011-  | 15481 | 818.16  | 2.484952 | 4 S.DFFPTEQ Splice@chr   | 1.03E-14 | 0        |
| 1Mar2011-  | 14771 | 1090.55 | 8.013909 | 3 S.DFFPTEQ Splice@chr   | 7.43E-12 | 1.56E-04 |
| 1Mar2011-  | 14079 | 1090.55 | 8.013909 | 3 S.DFFPTEQ Splice@chr   | 1.91E-12 | 1.56E-04 |
| 1Mar2011-  | 14077 | 818.17  | 14.73832 | 4 S.DFFPTEQ Splice@chr   | 5.12E-13 | 0        |
| 1Mar2011-  | 11273 | 818.16  | 2.484952 | 4 S.DFFPTEQ Splice@chr   | 1.37E-10 | 0.004184 |
| 1Mar2011-  | 13235 | 1090.56 | 17.20393 | 3 S.DFFPTEQ Splice@chr   | 2.41E-10 | 0.005935 |
| 1Mar2011-  | 13274 | 818.17  | 14.73832 | 4 S.DFFPTEQ Splice@chr   | 6.74E-13 | 0        |
| 1Mar2011-  | 13340 | 1090.55 | 8.013909 | 3 S.DFFPTEQ Splice@chr   | 3.66E-10 | 0.00756  |
| 1Mar2011-  | 13329 | 818.16  | 2.484952 | 4 S.DFFPTEQ Splice@chr   | 1.54E-13 | 0        |
| 1Mar2011-  | 12420 | 818.17  | 14.73832 | 4 S.DFFPTEQ Splice@chr   | 1.57E-12 | 0        |
| 1Mar2011-  | 13909 | 818.17  | 14.73832 | 4 S.DFFPTEQ Splice@chr   | 3.03E-11 | 8.54E-04 |
| 1Mar2011-  | 14625 | 1090.55 | 8.013909 | 3 S.DFFPTEQ Splice@chr   | 1.29E-10 | 0.005157 |
| 1Mar2011-  | 14620 | 818.17  | 14.73832 | 4 S.DFFPTEQ Splice@chr   | 1.38E-12 | 0        |
| 1Mar2011-  | 11623 | 1090.55 | 8.013909 | 3 S.DFFPTEQ Splice@chr   | 2.71E-13 | 0        |
| 1Mar2011-  | 11614 | 818.17  | 14.73832 | 4 S.DFFPTEQ Splice@chr   | 5.98E-11 | 0.001488 |
| 1Mar2011-  | 12902 | 1090.55 | 8.013909 | 3 S.DFFPTEQ Splice@chr   | 4.35E-18 | 0        |
| 1Mar2011-  | 13780 | 1090.55 | 8.013909 | 3 S.DFFPTEQ Splice@chr   | 1.16E-17 | 0        |
| 1Mar2011-  | 12618 | 818.17  | 14.73832 | 4 S.DFFPTEQ Splice@chr   | 3.01E-12 | 0        |
| 1Mar2011-  | 17642 | 995.61  | 27.67701 | 1 R.KSFMKR/ chr5@9234    | 1.78E-10 | 0.004207 |
| 19July2011 | 1041  | 422.23  | -19.706  | 2 K.SSSLGHKI Splice@chr  | 2.95E-10 | 0.008351 |
| 19July2011 | 6855  | 646.38  | -8.03869 | 2 K.FVELEKG chr4@9504    | 2.28E-11 | 0.00166  |
| 19July2011 | 2709  | 474.27  | 14.61646 | 3 R.ASKDFIPI chrX@7988   | 3.71E-10 | 0.005731 |
| 1Mar2011-  | 4522  | 528.31  | -8.68116 | 2 K.LGLTSAA. chr3@6258   | 1.03E-10 | 0.0023   |
| 1Mar2011-  | 4801  | 528.3   | -27.664  | 2 K.LGLTSAA. chr3@6258   | 9.38E-11 | 0.003151 |
| 1Mar2011-  | 4745  | 528.31  | -8.68116 | 2 K.LGLTSAA. chr3@6258   | 1.13E-10 | 0.003463 |
| 1Mar2011-  | 6537  | 610.32  | 20.63557 | 2 R.VVDHVDI chrX@7362    | 7.56E-11 | 0.001642 |
| 1Mar2011-  | 6651  | 610.32  | 20.63557 | 2 R.VVDHVDI chrX@7362    | 8.75E-11 | 0.00224  |
| 1Mar2011-  | 6594  | 610.32  | 20.63557 | 2 R.VVDHVDI chrX@7362    | 1.77E-10 | 0.004886 |
| 1Mar2011-  | 6710  | 610.32  | 20.63557 | 2 R.VVDHVDI chr3@1325    | 2.40E-10 | 0.005855 |
| 1Mar2011-  | 5595  | 610.32  | 20.63557 | 2 R.VVDHVDI chr3@1325    | 1.09E-10 | 0.004069 |
| 1Mar2011-  | 5127  | 610.32  | 20.63557 | 2 R.VVDHVDI chrX@7362    | 1.19E-10 | 0.003584 |
| 1Mar2011-  | 5073  | 610.32  | 20.63557 | 2 R.VVDHVDI chrX@7362    | 5.89E-11 | 0.002204 |
| 1Mar2011-  | 5178  | 610.32  | 20.63557 | 2 R.VVDHVDI chrX@7362    | 2.55E-10 | 0.007917 |
| 1Mar2011-  | 5817  | 610.32  | 20.63557 | 2 R.VVDHVDI chrX@7362    | 1.80E-10 | 0.005592 |
| 1Mar2011-  | 5763  | 610.32  | 20.63557 | 2 R.VVDHVDI chrX@7362    | 8.65E-11 | 0.00215  |
| 1Mar2011-  | 15477 | 837.13  | -17.4219 | 3 K.K+14.016 Splice@chr  | 2.13E-10 | 0.006241 |
| 1Mar2011-  | 13165 | 949.52  | -1.28696 | 2 __.NGK+14.( Splice@chr | 3.32E-18 | 0        |
| 1Mar2011-  | 12186 | 949.52  | -1.28696 | 2 __.NGK+14.( Splice@chr | 4.07E-15 | 0        |
| 1Mar2011-  | 12947 | 950.02  | -3.05541 | 2 __.NGK+14.( Splice@chr | 2.94E-19 | 0        |
| 1Mar2011-  | 13780 | 949.52  | -1.28696 | 2 __.NGK+14.( Splice@chr | 7.76E-20 | 0        |
| 1Mar2011-  | 12210 | 950.02  | -3.05541 | 2 __.NGK+14.( Splice@chr | 3.12E-18 | 0        |
| 1Mar2011-  | 12118 | 950.02  | -3.05541 | 2 __.NGK+14.( Splice@chr | 3.18E-18 | 0        |
| 1Mar2011-  | 11005 | 950.02  | -3.05541 | 2 __.NGK+14.( Splice@chr | 1.97E-18 | 0        |
| 1Mar2011-  | 16772 | 770.46  | -22.8445 | 1 R.K+14.016 chr2@9504   | 1.43E-10 | 0.00288  |
| 19July2011 | 8742  | 670.34  | -21.3776 | 3 __.PDM+15. chr3@8137   | 3.38E-10 | 0.009272 |

|            |       |         |          |                          |          |          |
|------------|-------|---------|----------|--------------------------|----------|----------|
| 1Mar2011-  | 15416 | 1056.56 | 19.35179 | 3 R.VENCFAL chr4@2035    | 1.14E-10 | 0.002467 |
| 19July2011 | 9771  | 1008.57 | 15.00158 | 2 K.NFLWKRI chr1@1445    | 9.79E-11 | 0.001778 |
| 19July2011 | 1111  | 583.81  | -17.4499 | 2 R.PMKISAY chr1@1047    | 1.19E-10 | 0.002231 |
| 19July2011 | 1168  | 583.81  | -17.4499 | 2 R.PMKISAY chr1@1047    | 3.67E-10 | 0.007068 |
| 1Mar2011-  | 16135 | 936.53  | -23.7475 | 2 R.NLIK+14.l Splice@chr | 2.72E-10 | 0.006906 |
| 1Mar2011-  | 7662  | 658.38  | -19.4975 | 2 K.LIPPIPFYL chr2@9072  | 1.80E-10 | 0.003857 |
| 19July2011 | 3203  | 641.28  | -9.81857 | 2 _._CFFSVDA chr3@9630   | 3.93E-11 | 0.001357 |
| 1Mar2011-  | 17845 | 673.71  | -19.9391 | 3 _._CGTVFSK chrX@1165   | 2.54E-10 | 0.006329 |
| 19July2011 | 3688  | 656.34  | -16.4492 | 2 K.HRTPYAK chr2@1325    | 2.10E-10 | 0.005276 |
| 1Mar2011-  | 5046  | 531.8   | -16.2132 | 2 K.K+14.016 chr2@1271   | 1.49E-10 | 0.00288  |
| 19July2011 | 7017  | 658.7   | -12.7446 | 3 R.EKKENKT chr2@2936    | 8.65E-11 | 0.004535 |
| 19July2011 | 443   | 623.3   | -27.8543 | 2 R.FLTNFVD Splice@chr   | 2.75E-10 | 0.007312 |
| 19July2011 | 2164  | 617.98  | -24.9949 | 3 K.SWTENSEI chr2@5217   | 2.25E-10 | 0.005873 |
| 19July2011 | 4459  | 724.38  | -9.36563 | 2 R.QETWNNK chr1@9690    | 2.45E-10 | 0.006747 |
| 1Mar2011-  | 5466  | 874.47  | 7.546803 | 1 _._TPQLSNS Splice@chr  | 1.78E-10 | 0.005092 |
| 1Mar2011-  | 19197 | 933.17  | 1.484147 | 3 K.NFDKLRE chr1@1120    | 2.12E-10 | 0.004846 |
| 1Mar2011-  | 17585 | 1078.56 | -19.9999 | 3 K.EDGTMK chr5@1270     | 3.77E-10 | 0.008039 |
| 1Mar2011-  | 10180 | 495.29  | -6.17408 | 2 R.VFIEVNLF chr4@5737   | 1.80E-10 | 0.003273 |
| 1Mar2011-  | 10854 | 495.29  | -6.17408 | 2 R.VFIEVNLF chr4@5737   | 1.85E-10 | 0.004997 |
| 1Mar2011-  | 9147  | 495.29  | -6.17408 | 2 R.VFIEVNLF chr4@5737   | 1.91E-10 | 0.005303 |
| 19July2011 | 9070  | 570.99  | -14.106  | 3 K.RHVLRLH! chr2@7628   | 4.72E-11 | 0.001317 |
| 1Mar2011-  | 6311  | 498.27  | -13.9924 | 2 K.MLRERYK chr2@1175    | 4.56E-10 | 0.009514 |
| 1Mar2011-  | 13757 | 991.07  | -20.8152 | 2 R.GHFIFKK- chr2@3260   | 2.38E-10 | 0.006902 |
| 1Mar2011-  | 7511  | 1127.56 | -26.8612 | 3 K.SANRQIG chr5@1515    | 1.49E-10 | 0.005077 |
| 1Mar2011-  | 7624  | 826.95  | 2.955913 | 2 R.THDPKRN chr4@1305    | 3.50E-10 | 0.008719 |
| 19July2011 | 3238  | 623.35  | 0.490367 | 2 K.NTKTRED Splice@chr   | 7.58E-11 | 0.001764 |
| 1Mar2011-  | 15597 | 932.57  | -2.7849  | 2 K.KKM+15. chrX@1720    | 2.29E-10 | 0.00685  |
| 1Mar2011-  | 15225 | 1026.52 | -9.6813  | 3 _._LISDMSN chr5@1458   | 1.87E-10 | 0.005189 |
| 1Mar2011-  | 16896 | 729.05  | -13.5024 | 3 _._IDFPDRI Splice@chr  | 1.85E-10 | 0.003614 |
| 1Mar2011-  | 14604 | 936.52  | 8.612084 | 2 R.LEDLYK+! chr2@1304   | 1.34E-10 | 0.003112 |
| 19July2011 | 305   | 463.25  | 17.71542 | 2 K.MREVAYI chrX@8272    | 8.55E-11 | 0.001885 |
| 1Mar2011-  | 13904 | 884.49  | 14.30075 | 2 R.LK+14.01 Splice@chr  | 3.36E-11 | 0.001549 |
| 19July2011 | 10244 | 804.39  | -26.4378 | 3 K.YSGAIGS! chr5@8147   | 1.63E-10 | 0.004948 |
| 1Mar2011-  | 12941 | 520.49  | -9.68127 | 5 K.K+14.016 chr3@1400   | 2.12E-10 | 0.003304 |
| 1Mar2011-  | 10613 | 1153.97 | 20.61083 | 3 T.FDLAGKC Splice@chr   | 7.53E-14 | 0        |
| 1Mar2011-  | 12016 | 950.96  | -16.5519 | 2 R.FQVICTF! chr5@1840   | 1.15E-10 | 0.003844 |
| 19July2011 | 4847  | 710.36  | -15.3504 | 3 K.EYQSARK Splice@chr   | 3.09E-10 | 0.008176 |
| 19July2011 | 6133  | 710.36  | -15.3504 | 3 K.EYQSARK Splice@chr   | 1.64E-10 | 0.004948 |
| 1Mar2011-  | 4174  | 522.3   | 15.34951 | 3 K.LNVDVQI chr2@3217    | 1.19E-10 | 0.001936 |
| 19July2011 | 8172  | 780.44  | 15.74    | 2 K.KTKM+15 Splice@chr   | 2.14E-10 | 0.009071 |
| 19July2011 | 2541  | 778.39  | -21.8263 | 2 I.RCNRAHL Splice@chr   | 1.76E-10 | 0.0028   |
| 1Mar2011-  | 3439  | 510.75  | 13.59037 | 2 K.TAGLCED chr2@1058    | 2.32E-10 | 0.005682 |
| 1Mar2011-  | 13394 | 936.02  | -16.1233 | 2 R.IFPK+14.l chr5@1865  | 1.26E-10 | 0.002879 |
| 1Mar2011-  | 19632 | 1123.1  | 7.537961 | 2 _._EKFWREF chr1@6712   | 2.21E-10 | 0.00514  |
| 1Mar2011-  | 9293  | 879.49  | -27.7008 | 2 K.SLPKSNN chr4@9980    | 1.14E-10 | 0.002191 |
| 1Mar2011-  | 8548  | 879.49  | -27.7008 | 2 K.SLPKSNN chr4@9980    | 1.87E-10 | 0.005826 |
| 1Mar2011-  | 9711  | 879.49  | -27.7008 | 2 K.SLPKSNN chr4@9980    | 2.38E-11 | 5.64E-04 |

|            |       |        |          |                        |          |          |
|------------|-------|--------|----------|------------------------|----------|----------|
| 1Mar2011-  | 9657  | 879.49 | -27.7008 | 2 K.SLPKSNN chr4@9980  | 2.07E-10 | 0.004846 |
| 1Mar2011-  | 10954 | 879.49 | -27.7008 | 2 K.SLPKSNN chr4@9980  | 1.93E-10 | 0.004632 |
| 1Mar2011-  | 10903 | 879.49 | -27.7008 | 2 K.SLPKSNN chr4@9980  | 1.39E-10 | 0.003726 |
| 1Mar2011-  | 10007 | 879.49 | -27.7008 | 2 K.SLPKSNN chr4@9980  | 1.29E-10 | 0.004496 |
| 1Mar2011-  | 9954  | 879.49 | -27.7008 | 2 K.SLPKSNN chr4@9980  | 2.24E-10 | 0.005827 |
| 1Mar2011-  | 9022  | 879.49 | -27.7008 | 2 K.SLPKSNN chr4@9980  | 2.61E-10 | 0.008257 |
| 1Mar2011-  | 9293  | 879.49 | -27.7008 | 2 K.SLPKSNN chr4@9980  | 1.53E-10 | 0.005098 |
| 1Mar2011-  | 8697  | 879.49 | -27.7008 | 2 K.SLPKSNN chr4@9980  | 1.69E-10 | 0.006714 |
| 1Mar2011-  | 9809  | 879.49 | -27.7008 | 2 K.SLPKSNN chr4@9980  | 1.30E-10 | 0.003289 |
| 1Mar2011-  | 8242  | 879.49 | -27.7008 | 2 K.SLPKSNN chr4@9980  | 4.63E-10 | 0.009152 |
| 1Mar2011-  | 8299  | 879.49 | -27.7008 | 2 K.SLPKSNN chr4@9980  | 1.66E-10 | 0.003794 |
| 1Mar2011-  | 9688  | 879.49 | -27.7008 | 2 K.SLPKSNN chr4@9980  | 9.81E-11 | 0.002752 |
| 1Mar2011-  | 9746  | 879.49 | -27.7008 | 2 K.SLPKSNN chr4@9980  | 1.89E-10 | 0.004682 |
| 1Mar2011-  | 10351 | 879.49 | -27.7008 | 2 K.SLPKSNN chr4@9980  | 1.74E-10 | 0.005086 |
| 1Mar2011-  | 10410 | 879.49 | -27.7008 | 2 K.SLPKSNN chr4@9980  | 8.85E-11 | 0.00301  |
| 1Mar2011-  | 8826  | 879.49 | -27.7008 | 2 K.SLPKSNN chr4@9980  | 1.07E-10 | 0.002467 |
| 1Mar2011-  | 8438  | 879.49 | -27.7008 | 2 K.SLPKSNN chr4@9980  | 1.03E-10 | 0.004163 |
| 1Mar2011-  | 8384  | 879.49 | -27.7008 | 2 K.SLPKSNN chr4@9980  | 9.73E-11 | 0.004163 |
| 1Mar2011-  | 8434  | 879.49 | -27.7008 | 2 K.SLPKSNN chr4@9980  | 1.67E-10 | 0.005065 |
| 1Mar2011-  | 8500  | 879.5  | -16.3002 | 2 K.SLPKSNN chr4@9980  | 1.87E-10 | 0.005333 |
| 1Mar2011-  | 10107 | 879.49 | -27.7008 | 2 K.SLPKSNN chr4@9980  | 4.92E-10 | 0.009146 |
| 1Mar2011-  | 8812  | 879.49 | -27.7008 | 2 K.SLPKSNN chr4@9980  | 1.76E-10 | 0.00383  |
| 1Mar2011-  | 9832  | 879.49 | -27.7008 | 2 K.SLPKSNN chr4@9980  | 8.99E-11 | 0.003486 |
| 1Mar2011-  | 8613  | 879.49 | -27.7008 | 2 K.SLPKSNN chr4@9980  | 2.14E-10 | 0.006412 |
| 1Mar2011-  | 1009  | 509.77 | 3.958958 | 2 R.QREESNK chr2@8565  | 1.73E-10 | 0.004322 |
| 19July2011 | 5092  | 524.95 | -0.62129 | 3 _LKNMHKI chrX@9976   | 3.86E-10 | 0.006186 |
| 1Mar2011-  | 9341  | 504.29 | 11.0765  | 3 _M+15.99 chr5@6336   | 2.99E-10 | 0.007625 |
| 1Mar2011-  | 10328 | 504.29 | 11.0765  | 3 _M+15.99 chr5@6336   | 1.25E-10 | 0.00259  |
| 1Mar2011-  | 9623  | 504.29 | 11.0765  | 3 _M+15.99 chr5@6336   | 2.41E-10 | 0.008551 |
| 1Mar2011-  | 2717  | 719.37 | -15.1416 | 1 K.PDPVPPP chr1@8995  | 2.44E-11 | 3.00E-04 |
| 1Mar2011-  | 3996  | 898.09 | 3.835016 | 3 H.DHPGQIS Splice@chr | 1.81E-16 | 0        |
| 1Mar2011-  | 3972  | 673.82 | 4.651773 | 4 H.DHPGQIS Splice@chr | 2.73E-11 | 7.03E-04 |
| 1Mar2011-  | 4021  | 673.82 | 4.651773 | 4 H.DHPGQIS Splice@chr | 1.24E-11 | 2.96E-04 |
| 1Mar2011-  | 5388  | 673.82 | 4.651773 | 4 H.DHPGQIS Splice@chr | 5.93E-11 | 0.001026 |
| 1Mar2011-  | 5390  | 898.09 | 3.835016 | 3 H.DHPGQIS Splice@chr | 9.97E-15 | 0        |
| 1Mar2011-  | 3559  | 673.82 | 4.651773 | 4 H.DHPGQIS Splice@chr | 1.21E-11 | 7.23E-04 |
| 1Mar2011-  | 3550  | 673.82 | 4.651773 | 4 H.DHPGQIS Splice@chr | 6.03E-12 | 1.67E-04 |
| 1Mar2011-  | 3102  | 673.82 | 4.651773 | 4 H.DHPGQIS Splice@chr | 4.82E-12 | 0        |
| 1Mar2011-  | 3484  | 673.82 | 4.651773 | 4 H.DHPGQIS Splice@chr | 1.79E-11 | 5.64E-04 |
| 1Mar2011-  | 3537  | 673.82 | 4.651773 | 4 H.DHPGQIS Splice@chr | 7.20E-13 | 2.20E-04 |
| 1Mar2011-  | 3936  | 898.09 | 3.835016 | 3 H.DHPGQIS Splice@chr | 2.23E-16 | 0        |
| 1Mar2011-  | 3937  | 673.82 | 4.651773 | 4 H.DHPGQIS Splice@chr | 4.69E-12 | 0        |
| 1Mar2011-  | 4639  | 673.82 | 4.651773 | 4 H.DHPGQIS Splice@chr | 2.78E-11 | 9.16E-04 |
| 1Mar2011-  | 4695  | 673.82 | 4.651773 | 4 H.DHPGQIS Splice@chr | 2.50E-11 | 6.93E-04 |
| 1Mar2011-  | 4520  | 673.82 | 4.651773 | 4 H.DHPGQIS Splice@chr | 2.50E-10 | 0.00491  |
| 1Mar2011-  | 3971  | 673.82 | 4.651773 | 4 H.DHPGQIS Splice@chr | 7.07E-12 | 6.64E-04 |
| 19July2011 | 4427  | 498.76 | 12.2389  | 4 K.FFAVSHC chr4@1591  | 4.62E-11 | 0.001659 |

|            |       |         |          |                         |          |          |
|------------|-------|---------|----------|-------------------------|----------|----------|
| 1Mar2011-  | 14790 | 959.13  | -18.5854 | 3 P.RCCNFPP chr1@1225   | 6.91E-11 | 0.001839 |
| 1Mar2011-  | 19123 | 1015.03 | -22.8119 | 2 R.LYRNTSK chrX@1435   | 2.24E-12 | 0        |
| 19July2011 | 8507  | 603.66  | 23.56447 | 3 F.CDKNSVS chr3@1345   | 1.41E-10 | 0.003724 |
| 19July2011 | 8261  | 700.36  | -6.98186 | 3 _K+14.016 chr2@2091   | 1.14E-10 | 0.004796 |
| 1Mar2011-  | 17845 | 954.53  | -15.2342 | 1 _HINLMIIT chr3@9035   | 4.23E-10 | 0.00988  |
| 1Mar2011-  | 2061  | 458.26  | -3.13683 | 2 K.VPDGTSL Splice@chr  | 2.76E-11 | 9.47E-04 |
| 1Mar2011-  | 1687  | 458.26  | -3.13683 | 2 K.VPDGTSL Splice@chr  | 1.46E-11 | 0        |
| 1Mar2011-  | 17531 | 1101.03 | -3.55105 | 2 K.KKCSPRM chrX@1355   | 1.03E-10 | 0.003858 |
| 1Mar2011-  | 16502 | 981.03  | -12.866  | 2 L.FTIHNNIP chr4@1725  | 3.25E-10 | 0.00867  |
| 19July2011 | 6118  | 635.34  | -18.3776 | 2 R.NTIIHFKS chr2@1558  | 3.67E-10 | 0.008242 |
| 1Mar2011-  | 16625 | 934.5   | -11.7035 | 1 K.SDAHILHI chr1@5688  | 2.67E-10 | 0.006821 |
| 1Mar2011-  | 15752 | 934.5   | -11.7035 | 1 K.SDAHILHI chr1@5688  | 2.43E-10 | 0.00625  |
| 1Mar2011-  | 18125 | 766.7   | 22.78258 | 3 R.EM+15.9 chr2@1192   | 3.97E-10 | 0.009686 |
| 1Mar2011-  | 15414 | 959.01  | 28.71873 | 2 R.K+14.016 chr4@1255  | 8.35E-11 | 0.002652 |
| 19July2011 | 9264  | 923.5   | 11.58369 | 3 K.YIENIENV chr5@1885  | 4.57E-10 | 0.008762 |
| 19July2011 | 1420  | 538.27  | -19.8803 | 2 _NSPLNRL Splice@chr   | 1.35E-10 | 0.002231 |
| 1Mar2011-  | 11421 | 847.95  | -23.6136 | 2 _RRWK+14 chr5@4341    | 1.69E-11 | 6.39E-04 |
| 19July2011 | 5070  | 702.38  | 25.29518 | 3 R.NFRHALE chr1@2415   | 4.61E-11 | 0.002282 |
| 1Mar2011-  | 11393 | 1002.99 | -17.3603 | 2 R.VQQKPRV Splice@chr  | 3.21E-10 | 0.00867  |
| 1Mar2011-  | 14076 | 843.48  | -4.1295  | 2 R.RVPVISFV Splice@chr | 1.99E-16 | 0        |
| 1Mar2011-  | 4274  | 743.45  | -11.6388 | 2 E.NMLLK+1 chr5@8542   | 9.97E-11 | 0.001889 |
| 1Mar2011-  | 3290  | 587.66  | 7.947516 | 3 K.WKLLFYI chr5@1176   | 4.89E-10 | 0.009146 |
| 19July2011 | 314   | 700.37  | 1.832728 | 2 K.KIENDVYI chr2@5515  | 1.40E-10 | 0.002818 |
| 1Mar2011-  | 3320  | 465.79  | -17.9248 | 2 K.LLIHGLHI chrX@7010  | 3.42E-10 | 0.006851 |
| 1Mar2011-  | 4598  | 584.33  | -29.5756 | 3 K.LSQKFPQ chr1@9357   | 3.54E-10 | 0.007226 |
| 1Mar2011-  | 4032  | 584.33  | -29.5756 | 3 K.LSQKFPQ chr1@9357   | 2.65E-10 | 0.008208 |
| 1Mar2011-  | 4311  | 584.33  | -29.5756 | 3 K.LSQKFPQ chr1@9357   | 3.14E-10 | 0.007326 |
| 1Mar2011-  | 5224  | 584.33  | -29.5756 | 3 K.LSQKFPQ chr1@9357   | 1.86E-10 | 0.002899 |
| 1Mar2011-  | 4563  | 584.33  | -29.5756 | 3 K.LSQKFPQ chr1@9357   | 3.08E-10 | 0.008296 |
| 1Mar2011-  | 5900  | 648.35  | -3.15935 | 2 K.TTVTLQM chr4@3816   | 1.90E-10 | 0.003717 |
| 19July2011 | 11787 | 839.77  | -27.069  | 3 K.IVIRGIHK chr4@1115  | 3.97E-10 | 0.00727  |
| 19July2011 | 10337 | 747.73  | -19.1807 | 3 _FPPSFTSY chr5@1237   | 7.13E-11 | 0.004008 |
| 19July2011 | 4467  | 676.84  | -27.8923 | 4 K.LNQLEFM chr5@2025   | 1.20E-10 | 0.00202  |
| 1Mar2011-  | 9416  | 839.44  | 0.072797 | 2 K.LENRSHS chr2@2975   | 1.18E-10 | 0.00232  |
| 1Mar2011-  | 8756  | 839.44  | 0.072797 | 2 K.LENRSHS chr2@2975   | 2.52E-10 | 0.006071 |
| 1Mar2011-  | 13534 | 1188.58 | 1.054946 | 2 K.KKEHKMI chr3@4461   | 2.44E-11 | 8.73E-04 |
| 1Mar2011-  | 8146  | 787.72  | -8.76957 | 3 _VRQHCSF Splice@chr   | 2.71E-10 | 0.005932 |
| 19July2011 | 9365  | 1158.11 | -28.3628 | 2 R.EIRRK+14 chr3@2525  | 6.15E-11 | 0.003283 |
| 1Mar2011-  | 8366  | 497.28  | -18.0334 | 2 K.DPEVLLLI chr5@1168  | 2.51E-10 | 0.006329 |
| 1Mar2011-  | 9592  | 497.28  | -18.0334 | 2 K.DPEVLLLI chr5@1168  | 3.60E-10 | 0.008171 |
| 1Mar2011-  | 7418  | 497.28  | -18.0334 | 2 K.DPEVLLLI chr5@1168  | 3.27E-10 | 0.009917 |
| 1Mar2011-  | 635   | 526.77  | -23.5655 | 2 K.VFPFAW5 chr5@1762   | 1.35E-10 | 0.005206 |
| 1Mar2011-  | 1849  | 674.36  | -24.8358 | 2 K.K+14.016 chr4@1475  | 5.34E-11 | 0.001448 |
| 1Mar2011-  | 14738 | 1102.6  | -1.63425 | 2 R.EERLKKM chrX@8065   | 2.39E-10 | 0.005897 |
| 1Mar2011-  | 9074  | 479.59  | -19.4697 | 3 K.LLLCELQI chr1@1375  | 2.10E-10 | 0.00538  |
| 1Mar2011-  | 14516 | 714.89  | -23.5691 | 2 K.RKPK+14 chr5@1460   | 3.68E-11 | 0.001384 |
| 1Mar2011-  | 12966 | 840.97  | 5.231848 | 2 K.CIRLRNFC chr3@1180  | 6.04E-11 | 0.002057 |

|            |       |         |          |                         |          |          |
|------------|-------|---------|----------|-------------------------|----------|----------|
| 1Mar2011-  | 15196 | 992.55  | 20.2328  | 2 K.SCNILISN Splice@chr | 3.15E-10 | 0.007545 |
| 19July2011 | 4881  | 569.8   | 27.01405 | 2 _._PFDFTASt chr3@6879 | 2.65E-10 | 0.007214 |
| 19July2011 | 9801  | 744.36  | 22.74443 | 2 R.VGFFFEAA Splice@chr | 1.55E-10 | 0.005602 |
| 1Mar2011-  | 14596 | 1161.6  | -8.49591 | 2 R.QQKSHH chr5@9407    | 2.35E-10 | 0.005668 |
| 19July2011 | 10747 | 652.14  | -0.28064 | 5 K.YFPLK+14 chr2@9968  | 5.86E-10 | 0.009751 |
| 1Mar2011-  | 15695 | 938.02  | 19.71635 | 2 S.IDM+15.5 Splice@chr | 3.49E-10 | 0.007603 |
| 19July2011 | 8159  | 840.46  | 15.7366  | 3 K.IVFKFLY chr5@1511   | 1.37E-10 | 0.006737 |
| 1Mar2011-  | 13169 | 865.4   | 1.719684 | 3 _._ISGLSDLY chr1@8591 | 5.09E-13 | 0        |
| 19July2011 | 10764 | 971.5   | -9.22392 | 3 K.IEIFSFSFF chr5@1189 | 4.51E-11 | 0.001851 |
| 19July2011 | 10707 | 705.91  | -17.9231 | 2 R.K+14.016 chr2@1510  | 3.46E-10 | 0.008383 |
| 1Mar2011-  | 10355 | 875.48  | -26.522  | 2 R.MRNK+1 chr2@1259    | 2.95E-10 | 0.009262 |
| 1Mar2011-  | 20862 | 954.93  | 12.71153 | 3 K.NLQSIRLF chr5@9586  | 1.46E-10 | 0.004053 |
| 1Mar2011-  | 16042 | 1183.39 | 23.04152 | 4 _._M+15.99 chrX@1074  | 2.17E-11 | 8.20E-04 |
| 1Mar2011-  | 9130  | 936.46  | -10.8557 | 3 F.WNLHDLI chrX@1459   | 3.01E-10 | 0.007509 |
| 1Mar2011-  | 10068 | 936.46  | -10.8557 | 3 F.WNLHDLI chrX@1459   | 1.90E-10 | 0.005104 |
| 1Mar2011-  | 6825  | 936.46  | -10.8557 | 3 F.WNLHDLI chrX@1459   | 3.39E-10 | 0.009552 |
| 1Mar2011-  | 8403  | 936.46  | -10.8557 | 3 F.WNLHDLI chrX@1459   | 3.32E-11 | 0.001549 |
| 1Mar2011-  | 8466  | 936.46  | -10.8557 | 3 F.WNLHDLI chrX@1459   | 9.50E-11 | 0.00215  |
| 1Mar2011-  | 8324  | 936.46  | -10.8557 | 3 F.WNLHDLI chrX@1459   | 8.07E-11 | 0.001809 |
| 1Mar2011-  | 9609  | 936.46  | -10.8557 | 3 F.WNLHDLI chrX@1459   | 3.74E-10 | 0.009606 |
| 1Mar2011-  | 8522  | 936.46  | -10.8557 | 3 F.WNLHDLI chrX@1459   | 9.52E-11 | 0.002611 |
| 1Mar2011-  | 8248  | 936.46  | -10.8557 | 3 F.WNLHDLI chrX@1459   | 1.60E-10 | 0.005341 |
| 1Mar2011-  | 7361  | 936.46  | -10.8557 | 3 F.WNLHDLI chrX@1459   | 2.61E-10 | 0.008169 |
| 1Mar2011-  | 509   | 572.38  | 17.19865 | 2 R.KTRSVVG chr2@8214   | 1.15E-10 | 0.004306 |
| 1Mar2011-  | 16589 | 918.45  | 1.886417 | 3 K.M+15.99 chr5@1445   | 3.19E-10 | 0.007684 |
| 1Mar2011-  | 18904 | 918.45  | 1.886417 | 3 K.M+15.99 chr5@1445   | 2.70E-10 | 0.006904 |
| 1Mar2011-  | 8768  | 839.44  | -4.3327  | 2 K.SESFFRN chr1@4987   | 3.17E-10 | 0.009234 |
| 1Mar2011-  | 15620 | 1162.69 | -12.3994 | 2 _._SLARKLAI chr3@1519 | 7.74E-11 | 0.00324  |
| 1Mar2011-  | 17978 | 1116.09 | 10.87107 | 2 _._KTFFVM+ chrX@9135  | 2.00E-10 | 0.004027 |
| 1Mar2011-  | 8948  | 854.41  | -11.0854 | 1 K.MAEYRG chrX@1559    | 1.18E-10 | 0.00335  |
| 1Mar2011-  | 9936  | 854.42  | 0.643671 | 1 K.MAEYRG chrX@1559    | 2.17E-10 | 0.00549  |
| 19July2011 | 4200  | 556.98  | 12.04799 | 3 K.FQENLLT chr5@1120   | 3.67E-10 | 0.006202 |
| 1Mar2011-  | 16030 | 755.78  | 24.69159 | 3 R.RRLQK+1 Splice@chr  | 1.38E-10 | 0.003298 |
| 1Mar2011-  | 20352 | 939.96  | -3.54343 | 2 K.M+15.99 chr3@1109   | 9.46E-11 | 0.002752 |
| 19July2011 | 1178  | 482.26  | 23.14623 | 2 K.VTTSWVI chr3@3828   | 9.89E-11 | 0.001778 |
| 1Mar2011-  | 16325 | 936.52  | 23.46896 | 2 _._LIFCNETC chr2@5345 | 3.25E-10 | 0.007383 |
| 1Mar2011-  | 578   | 470.27  | -17.6887 | 2 R.ISRITGHR Splice@chr | 2.09E-10 | 0.007324 |
| 19July2011 | 2265  | 436.75  | -12.8988 | 2 K.KAPTPTT Splice@chr  | 1.62E-10 | 0.0028   |
| 19July2011 | 5992  | 768.38  | 7.681884 | 2 K.RAIHCQE Splice@chr  | 3.23E-10 | 0.006623 |
| 1Mar2011-  | 21358 | 941.57  | -13.1081 | 1 _._K+14.016 chr3@1134 | 1.45E-10 | 0.003274 |
| 1Mar2011-  | 17634 | 914.51  | -18.4405 | 2 R.K+14.016 chr4@1646  | 2.42E-11 | 4.36E-04 |
| 19July2011 | 9783  | 797.4   | 25.2406  | 3 R.NFFIEDF chr5@1985   | 1.36E-10 | 0.003443 |
| 19July2011 | 9240  | 640.58  | -8.68417 | 4 K.EIYNHLK chr5@2241   | 2.65E-10 | 0.006573 |
| 1Mar2011-  | 18359 | 1193.93 | 1.500825 | 3 F.FQFISAIA chr4@1052  | 6.67E-11 | 0.001318 |
| 1Mar2011-  | 18372 | 895.7   | 2.114799 | 4 F.FQFISAIA chr4@1052  | 3.19E-10 | 0.007604 |
| 1Mar2011-  | 19400 | 895.7   | 2.114799 | 4 F.FQFISAIA chr4@1052  | 5.30E-11 | 0.001415 |
| 1Mar2011-  | 19709 | 1193.93 | 1.500825 | 3 F.FQFISAIA chr4@1052  | 1.97E-10 | 0.005412 |

|            |       |         |          |                          |          |          |
|------------|-------|---------|----------|--------------------------|----------|----------|
| 1Mar2011-  | 19671 | 895.7   | 2.114799 | 4 F.FQFISAIA chr4@1052   | 2.45E-11 | 0.001167 |
| 1Mar2011-  | 19678 | 1193.93 | 1.500825 | 3 F.FQFISAIA chr4@1052   | 1.86E-10 | 0.005202 |
| 1Mar2011-  | 16775 | 895.7   | 2.114799 | 4 F.FQFISAIA chr4@1052   | 3.53E-10 | 0.007311 |
| 1Mar2011-  | 17811 | 895.7   | 2.114799 | 4 F.FQFISAIA chr4@1052   | 3.37E-11 | 0.00102  |
| 1Mar2011-  | 17838 | 895.7   | 2.114799 | 4 F.FQFISAIA chr4@1052   | 2.83E-11 | 8.90E-04 |
| 1Mar2011-  | 17482 | 895.7   | 2.114799 | 4 F.FQFISAIA chr4@1052   | 3.24E-10 | 0.008708 |
| 1Mar2011-  | 18500 | 895.7   | 2.114799 | 4 F.FQFISAIA chr4@1052   | 2.60E-10 | 0.006013 |
| 1Mar2011-  | 18569 | 895.7   | 2.114799 | 4 F.FQFISAIA chr4@1052   | 1.98E-10 | 0.004796 |
| 1Mar2011-  | 19198 | 1193.93 | 1.500825 | 3 F.FQFISAIA chr4@1052   | 1.32E-10 | 0.00395  |
| 1Mar2011-  | 17004 | 1193.93 | 1.500825 | 3 F.FQFISAIA chr4@1052   | 5.94E-11 | 0.001903 |
| 19July2011 | 2562  | 480.6   | 20.42092 | 3 K.EK+14.01 chrX@1326   | 1.15E-10 | 0.002962 |
| 1Mar2011-  | 4614  | 783.96  | -5.02993 | 2 K.NRETIIIF chr5@1427   | 2.39E-11 | 0.001357 |
| 19July2011 | 1105  | 458.91  | -17.3278 | 3 K.LEKSTK+1 Splice@chr  | 3.01E-11 | 5.40E-04 |
| 1Mar2011-  | 2355  | 485.76  | -0.37591 | 2 R.LGWIGM chrX@1688     | 2.73E-11 | 8.05E-04 |
| 1Mar2011-  | 5008  | 539.82  | 5.777173 | 2 R.KILKNGYI chr4@1408   | 2.29E-10 | 0.006237 |
| 1Mar2011-  | 12939 | 862.95  | 0.920546 | 2 K.KRK+14.C chr3@6096   | 2.65E-10 | 0.007041 |
| 1Mar2011-  | 14985 | 963     | 27.6473  | 2 K.SCK+14.0 Splice@chr  | 3.63E-10 | 0.007226 |
| 1Mar2011-  | 14503 | 1197.96 | 20.82864 | 3 R.TGMAIPF chr4@8104    | 2.61E-10 | 0.007134 |
| 19July2011 | 8388  | 1010.5  | 0.48369  | 3 E.NGK+14.I chrX@3309   | 2.22E-10 | 0.009295 |
| 19July2011 | 7910  | 639.37  | -20.365  | 2 R.SPIK+14.I Splice@chr | 4.58E-10 | 0.007978 |
| 1Mar2011-  | 10591 | 534.79  | 2.972971 | 2 K.TVGKSSN chr3@1131    | 8.44E-11 | 0.003714 |
| 19July2011 | 9462  | 863.76  | 9.177702 | 3 K.NCLTDDS chrX@4075    | 2.85E-10 | 0.005694 |
| 19July2011 | 6136  | 712.86  | -11.5568 | 4 R.HLELCND chr4@7547    | 3.72E-10 | 0.009189 |
| 1Mar2011-  | 16392 | 1036.89 | 5.521432 | 3 R.RRVCSTG chr5@1938    | 1.74E-10 | 0.003956 |
| 1Mar2011-  | 6880  | 460.75  | -11.5883 | 4 _LFENEETI Splice@chr   | 4.71E-10 | 0.008765 |
| 1Mar2011-  | 1314  | 609.81  | -0.90229 | 2 R.HEWIVNI Splice@chr   | 1.63E-11 | 2.78E-04 |
| 1Mar2011-  | 1273  | 406.88  | 9.123152 | 3 R.HEWIVNI Splice@chr   | 1.98E-12 | 2.70E-04 |
| 1Mar2011-  | 1259  | 609.81  | -0.90229 | 2 R.HEWIVNI Splice@chr   | 2.07E-12 | 2.70E-04 |
| 1Mar2011-  | 7843  | 465.3   | 10.51679 | 2 _PILQLAFK Splice@chr   | 2.46E-10 | 0.006536 |
| 1Mar2011-  | 9597  | 465.3   | 10.51679 | 2 _PILQLAFK Splice@chr   | 2.38E-10 | 0.005793 |
| 1Mar2011-  | 9652  | 465.3   | 10.51679 | 2 _PILQLAFK Splice@chr   | 2.52E-10 | 0.006209 |
| 1Mar2011-  | 17585 | 1198.75 | 9.682211 | 2 R.K+14.016 chr3@5879   | 3.63E-10 | 0.009041 |
| 1Mar2011-  | 14958 | 936.52  | -11.5478 | 2 R.VWIFFSA chr3@1088    | 8.51E-11 | 0.002067 |
| 1Mar2011-  | 17165 | 665.33  | -28.6515 | 4 _CNNAYIK chr5@4103     | 5.26E-11 | 0.001319 |
| 19July2011 | 4898  | 853.1   | 8.528201 | 3 K.LFYTLTLL chr5@7076   | 1.72E-10 | 0.008059 |
| 1Mar2011-  | 9976  | 1065.56 | 27.5638  | 2 _FSIFNCHI Splice@chr   | 1.42E-10 | 0.00318  |
| 1Mar2011-  | 3881  | 606.81  | 14.87508 | 2 R.SFLESTLS chr5@9530   | 1.61E-10 | 0.004778 |
| 19July2011 | 9612  | 917.46  | -10.3894 | 3 R.KSAM+15 chr2@7825    | 1.95E-10 | 0.005972 |
| 1Mar2011-  | 12175 | 466.9   | -18.833  | 3 R.KNRKTYS chr1@7582    | 2.98E-10 | 0.009262 |
| 1Mar2011-  | 5193  | 579.05  | -16.5856 | 3 K.LRRIPKSR Splice@chr  | 5.65E-11 | 0.001292 |
| 1Mar2011-  | 4844  | 579.05  | -16.5856 | 3 K.LRRIPKSR chr1@1329   | 7.05E-11 | 0.003076 |
| 1Mar2011-  | 7747  | 595.83  | -1.02611 | 2 K.VSGIFQG chr2@1863    | 2.46E-15 | 0        |
| 1Mar2011-  | 7801  | 595.83  | -1.02611 | 2 K.VSGIFQG chr2@1863    | 6.83E-17 | 0        |
| 1Mar2011-  | 8726  | 595.83  | -1.02611 | 2 K.VSGIFQG chr2@1863    | 7.03E-17 | 0        |
| 1Mar2011-  | 8673  | 595.83  | -1.02611 | 2 K.VSGIFQG chr2@1863    | 2.49E-15 | 0        |
| 1Mar2011-  | 6894  | 595.83  | -1.02611 | 2 K.VSGIFQG chr2@1863    | 2.49E-15 | 0        |
| 1Mar2011-  | 6947  | 595.83  | -1.02611 | 2 K.VSGIFQG chr2@1863    | 1.02E-16 | 0        |

|            |       |         |          |                        |          |          |
|------------|-------|---------|----------|------------------------|----------|----------|
| 1Mar2011-  | 7845  | 595.83  | -1.02611 | 2 K.VSGIFQG chr2@1865  | 1.03E-16 | 0        |
| 1Mar2011-  | 7896  | 595.83  | -1.02611 | 2 K.VSGIFQG chr2@1865  | 6.83E-17 | 0        |
| 19July2011 | 14    | 432.89  | 5.181893 | 3 R.IMGMTT Splice@chr  | 5.19E-11 | 0.003283 |
| 1Mar2011-  | 14564 | 890.44  | -9.31241 | 3 R.FDVVMN chr1@6247   | 3.24E-10 | 0.007684 |
| 1Mar2011-  | 1954  | 666.38  | 22.8415  | 2 K.SNGSGAI Splice@chr | 3.88E-10 | 0.009156 |
| 1Mar2011-  | 3487  | 666.38  | 22.8415  | 2 K.SNGSGAI Splice@chr | 1.75E-10 | 0.004784 |
| 1Mar2011-  | 4241  | 666.38  | 22.8415  | 2 K.SNGSGAI Splice@chr | 3.41E-10 | 0.007776 |
| 1Mar2011-  | 4137  | 666.38  | 22.8415  | 2 K.SNGSGAI Splice@chr | 2.25E-10 | 0.005135 |
| 1Mar2011-  | 3014  | 666.38  | 22.8415  | 2 K.SNGSGAI Splice@chr | 3.60E-10 | 0.009414 |
| 1Mar2011-  | 3564  | 666.38  | 22.8415  | 2 K.SNGSGAI Splice@chr | 1.37E-10 | 0.004186 |
| 1Mar2011-  | 3616  | 666.38  | 22.8415  | 2 K.SNGSGAI Splice@chr | 2.99E-10 | 0.007128 |
| 1Mar2011-  | 3360  | 666.38  | 22.8415  | 2 K.SNGSGAI Splice@chr | 2.92E-10 | 0.007809 |
| 1Mar2011-  | 4115  | 666.38  | 22.8415  | 2 K.SNGSGAI Splice@chr | 2.52E-10 | 0.006028 |
| 1Mar2011-  | 4060  | 666.38  | 22.8415  | 2 K.SNGSGAI Splice@chr | 2.21E-11 | 9.49E-04 |
| 1Mar2011-  | 1476  | 666.38  | 22.8415  | 2 K.SNGSGAI Splice@chr | 3.77E-10 | 0.009076 |
| 1Mar2011-  | 13721 | 1032.57 | 14.08211 | 2 R.RSIRCSA Splice@chr | 8.84E-11 | 0.002468 |
| 1Mar2011-  | 7769  | 908.94  | -14.2379 | 4 R.TFHAQVI Splice@chr | 4.84E-12 | 1.50E-04 |
| 1Mar2011-  | 14309 | 1019.03 | -2.81786 | 4 K.DKK+14.( chr3@1215 | 1.80E-10 | 0.00503  |
| 1Mar2011-  | 12912 | 941.01  | -6.00813 | 2 K.YRCK+14 chr2@3902  | 1.02E-10 | 0.002962 |
| 1Mar2011-  | 11971 | 604.32  | 3.237348 | 2 R.NDLSTSS chr5@1474  | 3.22E-10 | 0.008409 |
| 1Mar2011-  | 17789 | 1197.36 | -21.8351 | 4 R.FDKKWS chrX@1520   | 1.87E-10 | 0.007292 |
| 1Mar2011-  | 9963  | 632.35  | -20.0114 | 2 _IAINREKT Splice@chr | 4.10E-10 | 0.008739 |
| 19July2011 | 9880  | 862.82  | 20.71289 | 3 K.MAQKW chrX@1570    | 3.83E-10 | 0.009677 |
| 19July2011 | 4223  | 661.86  | -7.48096 | 2 _INFSFNR chr4@1194   | 9.10E-11 | 0.003162 |
| 1Mar2011-  | 9661  | 580.96  | -6.56257 | 3 K.MPNFRTI chr5@2685  | 2.49E-10 | 0.006329 |
| 1Mar2011-  | 10227 | 580.98  | 27.83599 | 3 K.MPNFRTI chr5@2685  | 3.38E-12 | 0        |
| 1Mar2011-  | 18721 | 910.17  | -1.1409  | 3 R.QHILNHA chr1@1398  | 2.92E-10 | 0.007042 |
| 1Mar2011-  | 18689 | 1191.16 | -18.1446 | 4 K.QKNVIQK chrX@9807  | 2.17E-10 | 0.006359 |
| 19July2011 | 13052 | 582.35  | 0.979908 | 3 K.NTELK+1 chr4@1578  | 2.78E-10 | 0.005895 |
| 1Mar2011-  | 3945  | 423.27  | -25.9732 | 2 _LGTTVLL chr1@3617   | 3.52E-10 | 0.008509 |
| 1Mar2011-  | 17214 | 819.42  | -11.634  | 2 K.SDEK+14 chr2@5960  | 1.23E-10 | 0.003439 |
| 1Mar2011-  | 1275  | 532.26  | -23.0545 | 2 _EYVKGSS Splice@chr  | 3.17E-10 | 0.008708 |
| 19July2011 | 9669  | 651.7   | -18.9872 | 3 R.IFQKSISA chr4@2445 | 2.77E-10 | 0.00769  |
| 19July2011 | 10159 | 651.36  | -27.591  | 3 R.IFQKSISA chr4@2445 | 3.34E-11 | 0.002416 |
| 1Mar2011-  | 447   | 516.31  | -27.6811 | 2 R.KKKDDKL chr3@3575  | 2.38E-10 | 0.00559  |
| 19July2011 | 8932  | 914.14  | 12.14826 | 3 K.AHPSHSN chrX@1605  | 1.43E-11 | 3.11E-04 |
| 1Mar2011-  | 13800 | 554.3   | -28.4599 | 2 K.CLGLGYL chr2@9237  | 2.70E-10 | 0.005932 |
| 1Mar2011-  | 3237  | 415.74  | -1.69243 | 2 R.LAELSAAI chr1@1418 | 2.80E-10 | 0.007246 |
| 1Mar2011-  | 19464 | 985.64  | 16.94361 | 3 R.SKVLSQK chr1@9628  | 4.40E-10 | 0.008831 |
| 19July2011 | 7683  | 814.91  | -4.5384  | 2 Y.RKSRKMF chr2@1147  | 4.11E-10 | 0.006848 |
| 19July2011 | 9607  | 540.97  | -8.06317 | 3 _TGASVDC chr4@9526   | 1.76E-11 | 9.00E-04 |
| 1Mar2011-  | 12999 | 1069.53 | 18.39333 | 2 V.CK+14.01 chr5@1286 | 3.10E-10 | 0.008307 |
| 1Mar2011-  | 6575  | 837.43  | -27.0718 | 2 G.HTKK+14 chr2@2481  | 1.47E-10 | 0.002349 |
| 1Mar2011-  | 5327  | 552.32  | 25.43342 | 2 K.NITKTHFI chr5@7485 | 1.88E-10 | 0.003717 |
| 1Mar2011-  | 19821 | 940.52  | -4.09485 | 1 R.FFRGWV chrX@7926   | 1.67E-10 | 0.004411 |
| 1Mar2011-  | 7399  | 805.92  | -11.8291 | 2 R.LLCCFRSC chrX@3165 | 1.44E-10 | 0.005318 |
| 1Mar2011-  | 18223 | 777.41  | -27.6709 | 4 K.NFDFFRK chr5@1886  | 1.64E-10 | 0.003817 |

|            |       |         |          |                          |          |          |
|------------|-------|---------|----------|--------------------------|----------|----------|
| 1Mar2011-  | 2127  | 535.32  | 7.719926 | 2 _..LKFEHLP( chrX@1105  | 3.48E-10 | 0.008248 |
| 19July2011 | 2172  | 415.56  | 8.245034 | 3 R.WAGILTA chr2@1052    | 2.71E-10 | 0.00769  |
| 1Mar2011-  | 16221 | 936.52  | 8.416354 | 2 R.K+14.016 Splice@chr  | 8.12E-11 | 0.002182 |
| 1Mar2011-  | 18700 | 1009.86 | 28.26419 | 3 R.TFSNFLEI chr5@1835   | 1.63E-10 | 0.00397  |
| 1Mar2011-  | 62    | 773.43  | 3.950909 | 1 R.EAKAGA/ chr1@6054    | 2.42E-10 | 0.006117 |
| 19July2011 | 1360  | 538.29  | 20.9028  | 2 R.ETVNATE chr4@7214    | 3.66E-11 | 0.002473 |
| 1Mar2011-  | 6585  | 526.29  | -15.3375 | 3 R.SQPLQAK Splice@chr   | 1.46E-12 | 0        |
| 1Mar2011-  | 6527  | 526.29  | -15.3375 | 3 R.SQPLQAK Splice@chr   | 1.57E-10 | 0.003576 |
| 19July2011 | 8655  | 832.45  | -2.86293 | 4 K.MFSLMP! Splice@chr   | 4.66E-10 | 0.008762 |
| 1Mar2011-  | 15165 | 817.48  | 4.485304 | 3 R.KIDKFTEk chr3@1955   | 1.54E-10 | 0.004778 |
| 19July2011 | 11322 | 716.38  | -16.8076 | 2 K.FHFHFRE chr4@6931    | 1.63E-10 | 0.005763 |
| 1Mar2011-  | 13727 | 981.54  | 19.8373  | 2 R.HFWK+1+ chr3@2836    | 2.02E-10 | 0.003165 |
| 1Mar2011-  | 9251  | 939.54  | 14.41377 | 2 R.RRRRDPL chr2@1405    | 3.09E-10 | 0.007224 |
| 1Mar2011-  | 9868  | 951.01  | -12.5281 | 2 K.FVFPMVt chrX@9587    | 2.93E-10 | 0.00825  |
| 1Mar2011-  | 6628  | 559.31  | -19.787  | 2 K.K+14.016 chr1@1421   | 7.18E-11 | 0.001598 |
| 1Mar2011-  | 15716 | 929.06  | 14.60048 | 2 K.FSIIVALG chr1@1748   | 2.72E-10 | 0.006549 |
| 1Mar2011-  | 19259 | 746.91  | -23.3754 | 2 K.YFLSISLSI chr5@6218  | 6.68E-11 | 0.00334  |
| 1Mar2011-  | 5301  | 480.26  | -16.3012 | 3 R.NIPNKTSI Splice@chr  | 3.07E-10 | 0.008781 |
| 19July2011 | 725   | 465.77  | 6.631985 | 2 R.INDIAKEt chrX@2905   | 1.47E-10 | 0.003184 |
| 1Mar2011-  | 11858 | 951.46  | 8.091403 | 2 _..WKRM+1 Splice@chr   | 1.69E-10 | 0.004116 |
| 19July2011 | 14516 | 794.42  | 15.38572 | 4 R.WM+15.! Splice@chr   | 1.90E-10 | 0.006955 |
| 19July2011 | 14544 | 794.42  | 15.38572 | 4 R.WM+15.! Splice@chr   | 3.07E-10 | 0.009085 |
| 19July2011 | 8772  | 705.72  | 7.506261 | 3 K.QEQTNH chr1@1225     | 8.38E-11 | 0.002546 |
| 1Mar2011-  | 3222  | 443.23  | -2.2083  | 2 R.RSADSPP chrX@4877    | 2.16E-10 | 0.006412 |
| 1Mar2011-  | 2285  | 970.47  | 8.573414 | 1 K.FGNWNF chr5@2072     | 7.36E-11 | 0.001872 |
| 19July2011 | 14291 | 742.39  | 18.33163 | 3 R.SKPMDKI chr5@1995    | 3.19E-10 | 0.009235 |
| 1Mar2011-  | 8857  | 732.07  | 18.62774 | 3 R.VHPWYIY chrX@7314    | 4.29E-10 | 0.00984  |
| 1Mar2011-  | 19320 | 1024.03 | -21.0395 | 2 _..GVWGAC Splice@chr   | 4.01E-10 | 0.008259 |
| 1Mar2011-  | 19377 | 1150.63 | -11.3389 | 2 _..QANMFIF chr5@1628   | 2.95E-10 | 0.007367 |
| 1Mar2011-  | 1158  | 522.29  | -2.81007 | 2 K.GHAKKFN chr5@3227    | 6.58E-11 | 0.001026 |
| 1Mar2011-  | 1192  | 522.29  | -2.81007 | 2 K.GHAKKFN chr5@3227    | 2.80E-11 | 4.08E-04 |
| 1Mar2011-  | 692   | 522.29  | -2.81007 | 2 K.GHAKKFN chr5@3227    | 1.47E-10 | 0.004389 |
| 1Mar2011-  | 710   | 522.29  | -2.81007 | 2 K.GHAKKFN chr5@3227    | 3.02E-11 | 0.001293 |
| 1Mar2011-  | 1088  | 522.29  | -2.81007 | 2 K.GHAKKFN chr5@3227    | 1.28E-10 | 0.005157 |
| 1Mar2011-  | 996   | 522.29  | -2.81007 | 2 K.GHAKKFN chr5@3227    | 2.15E-10 | 0.006781 |
| 1Mar2011-  | 725   | 522.29  | -2.81007 | 2 K.GHAKKFN chr5@3227    | 9.71E-11 | 0.001653 |
| 19July2011 | 4834  | 495.02  | -22.0942 | 4 K.LKINIAYS chr1@9585   | 1.33E-10 | 0.003441 |
| 19July2011 | 11275 | 792.38  | -5.59377 | 2 R.QFDTIAD Splice@chr   | 1.20E-10 | 0.00242  |
| 1Mar2011-  | 5250  | 692.38  | -21.7167 | 2 K.FIK+14.0: chrX@6674  | 3.34E-11 | 0.001399 |
| 1Mar2011-  | 15154 | 851.41  | -24.0201 | 2 R.KIDNTKD chrX@3702    | 6.06E-11 | 0.002289 |
| 1Mar2011-  | 13147 | 851.41  | -24.0201 | 2 R.KIDNTKD chrX@3702    | 1.51E-11 | 6.64E-04 |
| 1Mar2011-  | 4136  | 528.31  | -19.3299 | 2 R.RQTVSPL chr5@1640    | 3.78E-11 | 9.62E-04 |
| 1Mar2011-  | 8067  | 839.95  | -16.1228 | 2 K.LIQLFGIV chr4@1266   | 2.91E-10 | 0.007267 |
| 1Mar2011-  | 14712 | 945.03  | -11.9609 | 2 K.KLEFLLEN chr4@1092   | 5.68E-11 | 0.001812 |
| 1Mar2011-  | 11297 | 945.04  | -1.42238 | 2 K.KLEFLLEN chr4@1092   | 2.93E-10 | 0.009119 |
| 1Mar2011-  | 11903 | 765.46  | -12.1358 | 2 R.DIIISLYIR' chr5@9671 | 1.08E-10 | 0.003285 |
| 19July2011 | 7235  | 601.34  | -1.08447 | 3 K.PKEVSKEI chrX@3807   | 4.21E-10 | 0.009436 |

|            |       |         |          |                         |          |          |
|------------|-------|---------|----------|-------------------------|----------|----------|
| 1Mar2011-  | 9654  | 437.27  | -23.3169 | 3 K.SVK+14.C chr3@620   | 1.78E-10 | 0.003717 |
| 1Mar2011-  | 12852 | 677.36  | 9.746196 | 2 K.FWQTGN chr3@1190    | 3.31E-10 | 0.009265 |
| 1Mar2011-  | 14880 | 897.45  | -23.1264 | 2 R.SDSMMT chrX@1157    | 3.39E-10 | 0.009574 |
| 1Mar2011-  | 19694 | 981.49  | -15.4757 | 2 R.FDSTRIT chr5@464    | 5.67E-10 | 0.009784 |
| 19July2011 | 2321  | 652.34  | -7.78062 | 3 K.NFGGKF chr4@1477    | 9.81E-11 | 0.006297 |
| 19July2011 | 13186 | 939.82  | -20.6304 | 3 K.SFKKM+1 chr4@234    | 2.50E-10 | 0.005647 |
| 1Mar2011-  | 1768  | 506.31  | 1.87224  | 2 R.LVLGFLG chr2@1070   | 4.85E-11 | 0.001483 |
| 19July2011 | 10915 | 758.42  | 25.18171 | 3 R.GPSWIIN chr5@832    | 4.20E-10 | 0.007934 |
| 19July2011 | 7486  | 675.38  | 26.06659 | 3 K.QNTK+14 chrX@1210   | 2.08E-12 | 0        |
| 19July2011 | 10517 | 730.73  | -11.463  | 3 R.DANMSA Splice@chr   | 2.60E-10 | 0.006078 |
| 1Mar2011-  | 4510  | 560.32  | -7.82399 | 3 R.LLPSYTA chr2@132    | 1.09E-10 | 0.002328 |
| 1Mar2011-  | 3695  | 464.29  | 20.94791 | 2 K.RHGIF chrX@6337     | 2.42E-10 | 0.00791  |
| 1Mar2011-  | 15048 | 1096.6  | 3.038561 | 2 _NWK+14. Splice@chr   | 1.93E-10 | 0.005819 |
| 1Mar2011-  | 13679 | 885.41  | -2.76051 | 2 _FGGEDW Splice@chr    | 2.89E-10 | 0.006358 |
| 19July2011 | 6579  | 712.85  | -22.807  | 4 R.FSYVCG Splice@chr   | 9.87E-11 | 0.003609 |
| 1Mar2011-  | 6970  | 552.26  | 29.34191 | 2 _GWYGDT chr1@1350     | 3.08E-10 | 0.007338 |
| 1Mar2011-  | 3095  | 488.28  | 2.672196 | 3 _NIICFLT Splice@chr   | 3.68E-12 | 3.97E-04 |
| 1Mar2011-  | 7334  | 744.36  | 8.094609 | 2 K.FDNPNFY Splice@chr  | 4.31E-10 | 0.00984  |
| 19July2011 | 3815  | 664.36  | -6.21373 | 2 K.NQSLGFR chrX@151    | 1.99E-10 | 0.005658 |
| 1Mar2011-  | 11438 | 1017.55 | 17.63238 | 2 R.DGK+14.I chr2@867   | 4.17E-10 | 0.008851 |
| 19July2011 | 9041  | 600.31  | 13.21448 | 3 _VNTSTDII chr2@6367   | 1.93E-10 | 0.005214 |
| 19July2011 | 4806  | 600.31  | 13.21448 | 3 _VNTSTDII chr2@6367   | 3.98E-10 | 0.007997 |
| 1Mar2011-  | 14600 | 843.45  | -25.9701 | 3 _YVKK+14. chr2@132    | 1.09E-10 | 0.004317 |
| 1Mar2011-  | 19788 | 1114.11 | -5.26398 | 2 V.LLHVSYS chrX@123    | 3.45E-10 | 0.008618 |
| 1Mar2011-  | 4636  | 554.81  | 26.89224 | 2 R.FSTIPDM chr2@826    | 4.10E-10 | 0.008902 |
| 1Mar2011-  | 2984  | 626.86  | 22.59698 | 2 R.KMSM+1 Splice@chr   | 9.90E-11 | 0.003508 |
| 19July2011 | 10792 | 570.05  | -25.7416 | 4 _NRNPLW chr2@912      | 4.10E-10 | 0.008681 |
| 19July2011 | 5308  | 437.27  | 14.20054 | 2 K.LTWVNIK chr3@610    | 5.85E-10 | 0.009751 |
| 19July2011 | 10618 | 747.38  | -15.1283 | 2 K.MLEILM+ chr2@142    | 2.22E-11 | 0.001605 |
| 1Mar2011-  | 15804 | 1098.11 | 7.375786 | 2 K.VK+14.01 Splice@chr | 1.27E-10 | 0.003711 |
| 1Mar2011-  | 13113 | 920.46  | -24.5608 | 2 R.IQVKTIGF Splice@chr | 4.81E-10 | 0.009964 |
| 19July2011 | 9237  | 944.46  | 23.65973 | 2 K.MRPKND chr2@800     | 2.59E-10 | 0.00813  |
| 1Mar2011-  | 20308 | 1037.54 | 0.570086 | 3 _ESAENRII chr3@286    | 2.89E-10 | 0.006977 |
| 19July2011 | 4988  | 667.69  | -12.2066 | 3 T.TCQRIFQ Splice@chr  | 4.50E-10 | 0.009989 |
| 1Mar2011-  | 12474 | 894.96  | 19.2541  | 2 R.WRYCK+ Splice@chr   | 1.93E-10 | 0.004589 |
| 1Mar2011-  | 287   | 516.31  | -27.6811 | 2 K.QKLKALS chrX@169    | 3.09E-10 | 0.006434 |
| 19July2011 | 4404  | 821.88  | -16.9243 | 2 R.RQIMNLE chr5@137    | 1.57E-10 | 0.004254 |
| 1Mar2011-  | 10485 | 786.42  | -1.3988  | 2 K.VIFRQM chr3@4837    | 1.00E-10 | 0.001904 |
| 1Mar2011-  | 11019 | 790.93  | 4.447072 | 2 R.K+14.016 chr5@323   | 1.58E-10 | 0.003465 |
| 1Mar2011-  | 4397  | 574.83  | 8.615718 | 2 K.MTVAM chr5@8077     | 4.32E-10 | 0.008265 |
| 1Mar2011-  | 2053  | 574.83  | 8.615718 | 2 K.MTVAM chr5@8077     | 3.04E-10 | 0.008781 |
| 1Mar2011-  | 2925  | 574.83  | 8.615718 | 2 K.MTVAM chr5@8077     | 1.51E-10 | 0.00288  |
| 1Mar2011-  | 4019  | 574.83  | 8.615718 | 2 K.MTVAM chr5@8077     | 1.19E-10 | 0.00296  |
| 1Mar2011-  | 3972  | 574.83  | 8.615718 | 2 K.MTVAM chr5@8077     | 2.48E-10 | 0.004987 |
| 1Mar2011-  | 3213  | 574.83  | 8.615718 | 2 K.MTVAM chr5@8077     | 2.68E-11 | 7.65E-04 |
| 1Mar2011-  | 3212  | 574.83  | 8.615718 | 2 K.MTVAM chr5@8077     | 7.83E-11 | 0.002414 |
| 1Mar2011-  | 3262  | 574.83  | 8.615718 | 2 K.MTVAM chr5@8077     | 3.09E-10 | 0.007853 |

|            |       |         |          |                         |          |          |
|------------|-------|---------|----------|-------------------------|----------|----------|
| 1Mar2011-  | 3302  | 574.83  | 8.615718 | 2 K.MTVAM\ chr5@807     | 1.38E-10 | 0.003298 |
| 1Mar2011-  | 4576  | 574.83  | 8.615718 | 2 K.MTVAM\ chr5@807     | 1.76E-10 | 0.004154 |
| 1Mar2011-  | 3092  | 574.83  | 8.615718 | 2 K.MTVAM\ chr5@807     | 3.35E-10 | 0.008961 |
| 1Mar2011-  | 3795  | 574.83  | 8.615718 | 2 K.MTVAM\ chr5@807     | 2.57E-10 | 0.007384 |
| 1Mar2011-  | 3740  | 574.83  | 8.615718 | 2 K.MTVAM\ chr5@807     | 6.49E-11 | 0.002858 |
| 1Mar2011-  | 1685  | 574.83  | 8.615718 | 2 K.MTVAM\ chr5@807     | 3.94E-10 | 0.009338 |
| 1Mar2011-  | 2817  | 574.83  | 8.615718 | 2 K.MTVAM\ chr5@807     | 1.86E-10 | 0.005154 |
| 1Mar2011-  | 17157 | 528.21  | -26.1287 | 2 K.TCEESGA Splice@chr  | 6.97E-11 | 0.003076 |
| 19July2011 | 624   | 545.29  | -21.7545 | 2 R.HIAGFKN chr3@126    | 3.61E-11 | 0.002473 |
| 19July2011 | 3986  | 730.9   | -6.27162 | 2 M.AK+14.0 chr1@126    | 2.15E-10 | 0.005972 |
| 1Mar2011-  | 6976  | 732.43  | 5.006859 | 2 I.KM+15.9 chrX@539    | 2.96E-10 | 0.007549 |
| 1Mar2011-  | 9997  | 932.5   | -21.142  | 3 _GSRQSVF chr5@169     | 2.14E-10 | 0.005097 |
| 1Mar2011-  | 19126 | 889.94  | 23.96334 | 2 K.TGK+14.( chr1@213   | 4.31E-10 | 0.00895  |
| 1Mar2011-  | 8489  | 560.81  | 9.376657 | 2 K.NRVFGQI chr1@346    | 1.86E-10 | 0.006594 |
| 19July2011 | 3881  | 590.3   | -10.9787 | 2 K.SDIWAF chr1@687     | 1.66E-10 | 0.003673 |
| 1Mar2011-  | 7354  | 442.9   | -0.27624 | 3 _SWVILGD chr4@127     | 5.80E-11 | 0.00226  |
| 1Mar2011-  | 16120 | 789.39  | 21.40369 | 3 R.LK+14.01 chrX@177   | 2.67E-10 | 0.006039 |
| 19July2011 | 1007  | 597.29  | -26.3773 | 2 K.ELYSSFYK chrX@737   | 2.15E-10 | 0.007798 |
| 1Mar2011-  | 14107 | 756.92  | 16.3105  | 2 A.FGRYLLH Splice@chr  | 3.39E-10 | 0.009574 |
| 19July2011 | 10490 | 647.37  | -7.45981 | 2 _EFLEKKT chr2@907     | 6.07E-11 | 0.002929 |
| 19July2011 | 9710  | 739.75  | -1.40421 | 3 R.EFFHLVA Splice@chr  | 1.97E-10 | 0.003291 |
| 1Mar2011-  | 22222 | 995.85  | -17.0809 | 3 R.FLFIGDG( chr3@334   | 2.23E-10 | 0.005033 |
| 1Mar2011-  | 1119  | 486.79  | 13.56963 | 2 R.QATAAG( chrX@131    | 1.19E-10 | 0.004155 |
| 1Mar2011-  | 12261 | 539.31  | -17.2342 | 2 R.DPK+14.( chr5@203   | 1.74E-11 | 6.87E-04 |
| 1Mar2011-  | 8234  | 648.67  | -5.75042 | 3 R.CVGLMD chr4@132     | 2.99E-10 | 0.006964 |
| 1Mar2011-  | 8498  | 648.67  | -5.75042 | 3 R.CVGLMD chr4@132     | 2.46E-10 | 0.005929 |
| 1Mar2011-  | 8332  | 648.67  | -5.75042 | 3 R.CVGLMD chr4@132     | 4.37E-10 | 0.009369 |
| 1Mar2011-  | 9478  | 648.67  | -5.75042 | 3 R.CVGLMD chr4@132     | 3.62E-10 | 0.009765 |
| 1Mar2011-  | 10209 | 648.67  | -5.75042 | 3 R.CVGLMD chr4@132     | 2.06E-10 | 0.004915 |
| 1Mar2011-  | 8081  | 648.67  | -5.75042 | 3 R.CVGLMD chr4@132     | 1.56E-10 | 0.004134 |
| 1Mar2011-  | 11705 | 977.97  | -28.9786 | 4 _ISSYFFSIF chr4@237   | 7.58E-11 | 0.001378 |
| 19July2011 | 2074  | 546.27  | 8.171487 | 2 H.LPSETHD chr3@378    | 4.41E-10 | 0.009847 |
| 19July2011 | 4865  | 546.27  | 8.171487 | 2 H.LPSETHD chr3@378    | 1.71E-10 | 0.003881 |
| 1Mar2011-  | 4366  | 600.38  | -18.3939 | 2 K.MIKIAAI( chr2@140   | 2.58E-10 | 0.005983 |
| 1Mar2011-  | 14847 | 623.84  | 25.25671 | 2 R.M+15.99 Splice@chr  | 1.88E-10 | 0.006594 |
| 1Mar2011-  | 3314  | 439.23  | -18.6123 | 2 R.SSNRSGL chr4@502    | 3.15E-10 | 0.007911 |
| 1Mar2011-  | 374   | 508.31  | 9.998099 | 2 K.FLVVPPTI Splice@chr | 1.41E-10 | 0.003215 |
| 1Mar2011-  | 18839 | 1022.5  | 11.95034 | 2 K.LFWCLD( chrX@126    | 8.31E-11 | 0.003644 |
| 1Mar2011-  | 7058  | 958.47  | 17.65818 | 1 R.MYLFCPK chr4@165    | 3.61E-10 | 0.009958 |
| 1Mar2011-  | 12035 | 886.98  | 7.784699 | 2 K.SK+14.01 chr1@281   | 1.79E-10 | 0.004207 |
| 1Mar2011-  | 21491 | 888.92  | -11.5482 | 2 R.SLECRYT( chr3@673   | 1.60E-10 | 0.004129 |
| 1Mar2011-  | 16212 | 730.44  | -0.66737 | 1 R.GGGGRV chr1@117     | 1.06E-10 | 0.002817 |
| 1Mar2011-  | 14700 | 1198.29 | -24.8087 | 3 K.RMYHRKI chr2@113    | 1.40E-10 | 0.004958 |
| 19July2011 | 4662  | 724.37  | 8.993956 | 2 R.KEQK+14 Splice@chr  | 2.81E-10 | 0.007189 |
| 19July2011 | 7038  | 919.43  | -21.7973 | 3 R.KISGYCSS chr4@410   | 1.62E-11 | 8.15E-04 |
| 19July2011 | 2083  | 552.97  | 11.61922 | 3 R.RSLDVSA chr2@247    | 6.38E-12 | 5.40E-04 |
| 1Mar2011-  | 19359 | 1187.6  | -25.7866 | 3 K.YQVK+14 chr5@184    | 1.22E-10 | 0.003321 |

|            |       |         |          |                          |          |          |
|------------|-------|---------|----------|--------------------------|----------|----------|
| 19July2011 | 1870  | 460.75  | 8.828587 | 2 _..LFADVEA chr4@1667   | 4.28E-10 | 0.007631 |
| 19July2011 | 2885  | 562.77  | -13.0378 | 4 R.K+14.016 chr4@5056   | 1.86E-10 | 0.004954 |
| 1Mar2011-  | 17150 | 852.81  | 20.76524 | 3 S.KEEEEHIP chrX@1615   | 3.12E-10 | 0.006821 |
| 1Mar2011-  | 7594  | 933.49  | 27.86781 | 2 K.NWKK+1 chr3@8799     | 1.54E-10 | 0.004497 |
| 1Mar2011-  | 19080 | 1132.54 | -25.4259 | 1 K.EHLAQM chrX@1474     | 2.85E-10 | 0.00704  |
| 1Mar2011-  | 14541 | 1096.09 | -27.6279 | 2 _..KIDKRPN chrX@5975   | 1.20E-10 | 0.004306 |
| 1Mar2011-  | 1863  | 672.39  | 16.00036 | 1 R.VGVNGA chr5@2317     | 7.05E-11 | 0.002733 |
| 19July2011 | 8384  | 818.4   | -18.0562 | 4 K.WGKM+1 chrX@8602     | 1.49E-10 | 0.007096 |
| 19July2011 | 4653  | 544.31  | 28.74171 | 3 V.NLDIK+1 chr4@3814    | 1.30E-10 | 0.006737 |
| 1Mar2011-  | 17166 | 1079.06 | -23.0803 | 2 R.WALEWT chr3@4762     | 5.39E-11 | 0.001126 |
| 1Mar2011-  | 14480 | 877     | -24.4555 | 2 K.QPK+14 chr2@1466     | 2.98E-11 | 8.90E-04 |
| 1Mar2011-  | 11758 | 672.36  | -1.81827 | 2 R.IWEKMOV chr1@2871    | 4.38E-10 | 0.007635 |
| 1Mar2011-  | 15065 | 869.52  | -18.7377 | 2 L.YFACIRK+ chr4@3344   | 3.44E-10 | 0.008906 |
| 1Mar2011-  | 7224  | 897.42  | -27.6753 | 3 _..QVREMH Splice@chr   | 3.27E-10 | 0.008437 |
| 1Mar2011-  | 5732  | 596.32  | 13.94377 | 2 K.M+15.99 chr2@1468    | 1.53E-10 | 0.004287 |
| 1Mar2011-  | 12052 | 888.97  | 20.94366 | 2 K.DITLEVEA Splice@chr  | 6.84E-16 | 0        |
| 1Mar2011-  | 15623 | 1007.86 | 15.19559 | 3 R.CWNRRA Splice@chr    | 1.28E-12 | 0        |
| 1Mar2011-  | 12206 | 888.47  | 22.8338  | 2 K.DITLEVEA Splice@chr  | 6.22E-13 | 0        |
| 1Mar2011-  | 12012 | 459.77  | 24.44308 | 2 _..MMLAPK chrX@1115    | 2.02E-10 | 0.005376 |
| 1Mar2011-  | 13686 | 946.46  | -26.1447 | 2 K.MWMNV Splice@chr     | 3.26E-10 | 0.008437 |
| 1Mar2011-  | 10011 | 838.94  | -22.1914 | 2 R.QFADLPS chr5@1898    | 3.39E-10 | 0.008906 |
| 1Mar2011-  | 6722  | 509.8   | -23.773  | 2 R.SSVIMLIV chr2@5767   | 1.32E-10 | 0.003942 |
| 1Mar2011-  | 3308  | 435.26  | 19.0452  | 2 K.KISAHGTI chr4@1727   | 5.24E-11 | 0.001677 |
| 1Mar2011-  | 1490  | 439.91  | 17.33685 | 3 K.NSQKNPI chr2@3540    | 2.24E-10 | 0.005718 |
| 1Mar2011-  | 14009 | 732.07  | 19.51873 | 3 R.ATDDWII Splice@chr   | 5.95E-11 | 0.002072 |
| 1Mar2011-  | 17488 | 1096.89 | 6.757706 | 3 K.DKPFFPSI Splice@chr  | 2.42E-10 | 0.006702 |
| 1Mar2011-  | 4198  | 533.82  | 16.26677 | 2 K.TNIYTILTI chr5@1329  | 3.13E-10 | 0.007989 |
| 1Mar2011-  | 13281 | 848.97  | 0.791766 | 2 R.LLELAPTC chr2@6685   | 8.13E-17 | 0        |
| 1Mar2011-  | 10862 | 856.97  | 3.779227 | 2 R.LLELAPTC chr2@6685   | 4.35E-16 | 0        |
| 1Mar2011-  | 10812 | 856.97  | 3.779227 | 2 R.LLELAPTC chr2@6685   | 1.15E-17 | 0        |
| 1Mar2011-  | 2810  | 564.32  | -22.6447 | 2 K.IFVLKHEM chr5@1811   | 2.90E-10 | 0.007645 |
| 1Mar2011-  | 3254  | 435.25  | -4.00582 | 2 K.KISAHGTI chr4@1727   | 2.66E-10 | 0.007048 |
| 1Mar2011-  | 15211 | 1097.23 | 11.82664 | 3 K.DKPFFPSI Splice@chr  | 3.08E-13 | 0        |
| 1Mar2011-  | 12328 | 592.98  | 16.54196 | 3 K.DITLEVEA Splice@chr  | 1.03E-12 | 0        |
| 1Mar2011-  | 3719  | 693.87  | -6.6949  | 2 V.ICVAVGD chr5@1065    | 2.29E-10 | 0.005839 |
| 1Mar2011-  | 11964 | 592.65  | 24.14055 | 3 K.DITLEVEA Splice@chr  | 1.11E-10 | 0.003188 |
| 1Mar2011-  | 18632 | 1097.22 | 2.692596 | 3 K.DKPFFPSI Splice@chr  | 2.28E-11 | 8.81E-04 |
| 1Mar2011-  | 16052 | 973.46  | 16.48633 | 3 _..GCSIVPIS Splice@chr | 4.80E-11 | 0.001677 |
| 1Mar2011-  | 11927 | 888.47  | 22.8338  | 2 K.DITLEVEA Splice@chr  | 4.63E-15 | 0        |
| 1Mar2011-  | 12316 | 888.47  | 22.8338  | 2 K.DITLEVEA Splice@chr  | 1.19E-12 | 0        |
| 1Mar2011-  | 5329  | 648.35  | -3.15935 | 2 K.TTVTLQN chr4@3816    | 3.28E-11 | 0.001145 |
| 1Mar2011-  | 12104 | 888.47  | 22.8338  | 2 K.DITLEVEA Splice@chr  | 5.33E-14 | 0        |
| 1Mar2011-  | 6777  | 509.8   | -23.773  | 2 R.SSVIMLIV chr2@5767   | 8.15E-11 | 0.002581 |
| 1Mar2011-  | 18369 | 860.69  | 14.08015 | 4 R.FQSAAIG Splice@chr   | 7.27E-14 | 0        |
| 1Mar2011-  | 8401  | 648.67  | -5.75042 | 3 R.CVGLMD chr4@1320     | 1.67E-10 | 0.004796 |
| 1Mar2011-  | 15834 | 587.56  | -6.32324 | 4 K.YLGAYLL Splice@chr   | 5.11E-11 | 0.001677 |
| 1Mar2011-  | 13013 | 795.03  | 29.45474 | 3 _..VLEAGGL Splice@chr  | 4.20E-11 | 0.001553 |

|           |       |         |          |                         |          |          |
|-----------|-------|---------|----------|-------------------------|----------|----------|
| 1Mar2011- | 12162 | 592.65  | 24.14055 | 3 K.DITLEVEA Splice@chr | 8.62E-12 | 4.60E-04 |
| 1Mar2011- | 10065 | 838.94  | -22.1914 | 2 R.QFADLPS chr5@1898   | 2.48E-10 | 0.006943 |
| 1Mar2011- | 15174 | 1003.19 | 17.13413 | 3 R.CWNRRA Splice@chr   | 1.85E-12 | 0        |
| 1Mar2011- | 15869 | 587.56  | -6.32324 | 4 K.YLGAYLL/ Splice@chr | 3.43E-11 | 0.001145 |
| 1Mar2011- | 12271 | 592.65  | 24.14055 | 3 K.DITLEVEA Splice@chr | 1.54E-11 | 7.40E-04 |
| 1Mar2011- | 13584 | 1009.49 | -7.44413 | 2 K.DGTFIYFE Splice@chr | 2.15E-10 | 0.005484 |
| 1Mar2011- | 11983 | 888.47  | 22.8338  | 2 K.DITLEVEA Splice@chr | 8.14E-16 | 0        |
| 1Mar2011- | 4417  | 533.82  | 16.26677 | 2 K.TNIYTILTI chr5@1329 | 2.21E-10 | 0.005718 |
| 1Mar2011- | 15890 | 1173.12 | -8.41237 | 2 K.YLGAYLL/ Splice@chr | 4.89E-11 | 0.001677 |
| 1Mar2011- | 15712 | 848.45  | 20.72052 | 2 S.SSLPGSKF chr5@1003  | 3.45E-10 | 0.009144 |
| 1Mar2011- | 19263 | 1040.9  | 3.834672 | 3 E.LFQIIVM- chr2@1065  | 4.87E-11 | 0.001677 |
| 1Mar2011- | 15910 | 587.56  | -6.32324 | 4 K.YLGAYLL/ Splice@chr | 1.19E-11 | 4.60E-04 |
| 1Mar2011- | 7595  | 431.58  | -18.2386 | 3 R.ANYLLKK Splice@chr  | 1.11E-10 | 0.003188 |
| 1Mar2011- | 11877 | 888.47  | 22.8338  | 2 K.DITLEVEA Splice@chr | 2.37E-16 | 0        |
| 1Mar2011- | 8756  | 671.37  | -24.0361 | 2 T.FNIVHTQ Splice@chr  | 3.19E-10 | 0.008437 |
| 1Mar2011- | 18705 | 828.39  | -8.00743 | 2 K.PNLK+14 chr2@3862   | 2.86E-10 | 0.007524 |
| 1Mar2011- | 6670  | 509.8   | -23.773  | 2 R.SSVIMLIV chr2@5767  | 1.86E-10 | 0.005274 |
| 22Feb2011 | 4247  | 446.75  | 3.354779 | 2 R.IFSAGELF chr3@5608  | 1.87E-10 | 0.00252  |
| 22Feb2011 | 6135  | 533.82  | 16.26677 | 2 K.TNIYTILTI chr5@1329 | 3.31E-10 | 0.005098 |
| 22Feb2011 | 20478 | 634.83  | -9.39461 | 2 R.VDIGDILF Splice@chr | 9.86E-13 | 1.36E-04 |
| 22Feb2011 | 5932  | 434.24  | 13.9946  | 3 _RSNDQTI chr5@6378    | 3.04E-10 | 0.004431 |
| 22Feb2011 | 13005 | 1005.16 | -21.3951 | 3 L.LTTCNRRI Splice@chr | 2.81E-10 | 0.004018 |
| 22Feb2011 | 21375 | 984.81  | -24.8852 | 3 K.SGTIFDNI Splice@chr | 8.59E-12 | 4.13E-04 |
| 22Feb2011 | 22558 | 984.81  | -24.8852 | 3 K.SGTIFDNI Splice@chr | 3.50E-10 | 0.005254 |
| 22Feb2011 | 22549 | 795.65  | -15.5001 | 4 K.SGTIFDNI Splice@chr | 1.71E-15 | 0        |
| 22Feb2011 | 14801 | 826.97  | -27.9106 | 2 R.RVPLPEG Splice@chr  | 3.29E-11 | 5.10E-04 |
| 22Feb2011 | 20028 | 957.5   | 22.57714 | 3 K.LFQVLQN Splice@chr  | 2.58E-10 | 0.003606 |
| 22Feb2011 | 10013 | 897.42  | -27.6753 | 3 _QVREMH Splice@chr    | 6.24E-10 | 0.008955 |
| 22Feb2011 | 17015 | 742.88  | -6.21424 | 2 K.M+15.99 chr4@1648   | 2.94E-10 | 0.004349 |
| 22Feb2011 | 23179 | 968.17  | -29.3651 | 3 R.FFYNIFAL chrX@4722  | 1.87E-10 | 0.00252  |
| 22Feb2011 | 22504 | 795.65  | -15.5001 | 4 K.SGTIFDNI Splice@chr | 9.17E-16 | 0        |
| 22Feb2011 | 5553  | 693.87  | -6.6949  | 2 V.ICVAVGD chr5@1063   | 1.82E-10 | 0.00252  |
| 22Feb2011 | 17112 | 1059.82 | -11.3751 | 3 I.SRSAAMF Splice@chr  | 2.13E-19 | 0        |
| 22Feb2011 | 5392  | 523.78  | 24.05167 | 2 K.LWDNNE Splice@chr   | 4.71E-10 | 0.00701  |
| 22Feb2011 | 11310 | 1020.5  | -14.5478 | 1 K.MNLGLE1 Splice@chr  | 6.75E-10 | 0.009812 |
| 22Feb2011 | 3957  | 741.38  | -23.1647 | 2 K.FPENRHI/ chr2@1477  | 3.11E-10 | 0.004514 |
| 22Feb2011 | 11469 | 851.48  | -15.2578 | 2 K.RGVRLSH chr2@2785   | 1.26E-10 | 0.001859 |
| 22Feb2011 | 16085 | 820.39  | -23.8985 | 4 R.TTGVVLD Splice@chr  | 4.06E-10 | 0.005879 |
| 22Feb2011 | 24599 | 760.4   | -4.0463  | 3 _TQTNTKI' chrX@7978   | 6.14E-10 | 0.008883 |
| 22Feb2011 | 7935  | 724.34  | 5.400383 | 3 V.CLTEEGK Splice@chr  | 7.36E-11 | 0.001352 |
| 22Feb2011 | 18898 | 864.94  | 10.49869 | 2 R.KSSTLMR chr4@1655   | 1.34E-12 | 2.57E-04 |
| 22Feb2011 | 18106 | 747.41  | 11.74382 | 2 V.EK+14.01 Splice@chr | 1.71E-10 | 0.00218  |
| 22Feb2011 | 6959  | 1025.61 | -11.6755 | 1 K.LGLGSGL chr5@4945   | 1.73E-11 | 4.13E-04 |
| 22Feb2011 | 19719 | 897.45  | -3.04709 | 4 R.FWFFGKI chr2@7020   | 3.37E-10 | 0.00518  |
| 22Feb2011 | 15527 | 888.97  | 20.94366 | 2 K.DITLEVEA Splice@chr | 4.00E-13 | 0        |
| 22Feb2011 | 19330 | 895.78  | -1.06827 | 3 _RELTEEDI Splice@chr  | 4.82E-10 | 0.007246 |
| 22Feb2011 | 21703 | 984.81  | -24.8852 | 3 K.SGTIFDNI Splice@chr | 3.84E-11 | 7.07E-04 |

|           |       |         |          |                           |          |          |
|-----------|-------|---------|----------|---------------------------|----------|----------|
| 22Feb2011 | 16967 | 742.88  | -6.21424 | 2 K.M+15.99 chr4@1648     | 5.35E-10 | 0.007691 |
| 22Feb2011 | 11608 | 662.35  | -4.61447 | 2 S.INM+15.9 chr4@2551    | 4.34E-10 | 0.006535 |
| 22Feb2011 | 38    | 599.78  | 26.60544 | 2 _ .M+15.99 chr2@8892    | 1.10E-11 | 4.13E-04 |
| 22Feb2011 | 21247 | 792.15  | -18.5783 | 4 K.SGTIFDNI Splice@chr   | 1.47E-17 | 0        |
| 22Feb2011 | 2600  | 864.38  | 14.63385 | 1 R.EDWGM/ chr5@6657      | 4.49E-10 | 0.006687 |
| 22Feb2011 | 18769 | 1003.19 | 17.13413 | 3 R.CWNRRA Splice@chr     | 2.36E-12 | 3.48E-04 |
| 22Feb2011 | 21475 | 795.65  | -15.5001 | 4 K.SGTIFDNI Splice@chr   | 3.26E-14 | 0        |
| 22Feb2011 | 23421 | 1147.24 | 4.705638 | 3 R.FQSAAIG Splice@chr    | 1.04E-16 | 0        |
| 22Feb2011 | 23383 | 1147.24 | 4.705638 | 3 R.FQSAAIG Splice@chr    | 5.60E-17 | 0        |
| 22Feb2011 | 24080 | 770.76  | -24.193  | 3 K.YLDAKCK chr4@3751     | 3.55E-10 | 0.005331 |
| 22Feb2011 | 24237 | 828.38  | -20.1128 | 2 K.PNLK+14 chr2@3862     | 1.29E-10 | 0.001943 |
| 22Feb2011 | 22998 | 984.81  | -24.8852 | 3 K.SGTIFDNI Splice@chr   | 2.52E-11 | 4.13E-04 |
| 22Feb2011 | 9101  | 616.33  | -16.7632 | 2 K.LSKSVIFQ chr3@2798    | 5.03E-10 | 0.007385 |
| 22Feb2011 | 46    | 509.3   | -20.473  | 2 R.SSVIMLIV chr2@5767    | 5.73E-11 | 0.001161 |
| 22Feb2011 | 17165 | 1060.15 | -15.5056 | 3 I.SRSAAMF Splice@chr    | 4.14E-17 | 0        |
| 22Feb2011 | 2656  | 864.38  | 14.63385 | 1 R.EDWGM/ chr5@6657      | 2.27E-11 | 4.13E-04 |
| 22Feb2011 | 6080  | 533.82  | 16.26677 | 2 K.TNIYTILT chr5@1329    | 2.30E-10 | 0.00302  |
| 22Feb2011 | 19152 | 1007.86 | 15.19559 | 3 R.CWNRRA Splice@chr     | 9.13E-11 | 0.00152  |
| 22Feb2011 | 13424 | 887.93  | 29.43791 | 2 I.DEREESTN Splice@chr   | 2.25E-10 | 0.00302  |
| 22Feb2011 | 21421 | 984.82  | -14.7074 | 3 K.SGTIFDNI Splice@chr   | 5.50E-11 | 9.84E-04 |
| 22Feb2011 | 21425 | 795.65  | -15.5001 | 4 K.SGTIFDNI Splice@chr   | 3.48E-14 | 0        |
| 22Feb2011 | 21384 | 795.65  | -23.4135 | 4 K.SGTIFDNI Splice@chr   | 9.74E-12 | 4.13E-04 |
| 22Feb2011 | 20521 | 634.83  | -9.39461 | 2 R.VDIGDILF Splice@chr   | 3.22E-13 | 0        |
| 22Feb2011 | 21494 | 968.13  | 18.26018 | 3 _ .GCSIVPIS Splice@chr  | 2.30E-10 | 0.00302  |
| 22Feb2011 | 19024 | 873.47  | 13.68595 | 2 R.SIFVDLEP Splice@chr   | 5.84E-12 | 3.48E-04 |
| 22Feb2011 | 2357  | 412.56  | -22.1132 | 3 _ .NPRGKKC Splice@chr   | 2.81E-10 | 0.004018 |
| 22Feb2011 | 12139 | 544.8   | -6.50987 | 2 R.LPTYVPA. chrX@1248    | 5.67E-10 | 0.008089 |
| 22Feb2011 | 21417 | 1060.54 | -6.74128 | 3 K.SGTIFDNI Splice@chr   | 4.29E-13 | 0        |
| 22Feb2011 | 6902  | 1025.61 | -11.6755 | 1 K.LGLGSL chr5@4945      | 2.49E-11 | 4.13E-04 |
| 22Feb2011 | 9488  | 595.32  | -0.4108  | 3 R.DECYASK Splice@chr    | 1.64E-10 | 0.002094 |
| 22Feb2011 | 18466 | 987.51  | 4.289691 | 3 K.KYLFLDNI chr4@1288    | 6.45E-11 | 0.001161 |
| 22Feb2011 | 5817  | 434.24  | 13.9946  | 3 _ .RSNDQTI chr5@6378    | 3.31E-10 | 0.005098 |
| 22Feb2011 | 15118 | 1056.56 | 28.0642  | 3 I.SRVEDDS( Splice@chr   | 8.20E-14 | 0        |
| 22Feb2011 | 14164 | 938.46  | 22.50833 | 2 R.ECSQSDS chr2@8876     | 6.57E-10 | 0.009339 |
| 22Feb2011 | 6390  | 493.78  | -11.3951 | 2 R.KNQENLI Splice@chr    | 3.16E-10 | 0.004855 |
| 22Feb2011 | 21017 | 975.8   | -15.4281 | 3 K.SGTIFDNI Splice@chr   | 4.59E-10 | 0.006846 |
| 22Feb2011 | 19383 | 694.87  | 2.550973 | 2 K.YHNITLQ chrX@3836     | 1.91E-10 | 0.00252  |
| 22Feb2011 | 6521  | 460.25  | -17.4268 | 2 K.YPGIGGI( chr5@1660    | 2.25E-10 | 0.00302  |
| 22Feb2011 | 2299  | 412.56  | -22.1132 | 3 _ .NPRGKKC Splice@chr   | 5.63E-10 | 0.008089 |
| 22Feb2011 | 19989 | 957.5   | 22.57714 | 3 K.LFQVLQN Splice@chr    | 3.81E-11 | 7.07E-04 |
| 22Feb2011 | 21576 | 795.65  | -23.4135 | 4 K.SGTIFDNI Splice@chr   | 1.15E-12 | 1.36E-04 |
| 22Feb2011 | 23043 | 984.81  | -24.8852 | 3 K.SGTIFDNI Splice@chr   | 1.96E-10 | 0.002602 |
| 22Feb2011 | 14917 | 858.48  | 6.006088 | 3 _ .LETGIKPI( Splice@chr | 7.09E-13 | 0        |
| 22Feb2011 | 23353 | 795.65  | -15.5001 | 4 K.SGTIFDNI Splice@chr   | 1.05E-16 | 0        |
| 22Feb2011 | 17630 | 722.45  | -4.95112 | 2 R.RK+14.01 Splice@chr   | 1.81E-10 | 0.004055 |
| 22Feb2011 | 4742  | 756.43  | -9.04908 | 1 R.PLSAAAA chr5@3132     | 4.01E-10 | 0.007982 |
| 22Feb2011 | 22904 | 795.65  | -15.5001 | 4 K.SGTIFDNI Splice@chr   | 1.44E-12 | 1.29E-04 |

|           |       |         |          |                         |          |          |
|-----------|-------|---------|----------|-------------------------|----------|----------|
| 22Feb2011 | 18468 | 1059.81 | -20.7519 | 3 I.SRSAAMF Splice@chr  | 7.84E-17 | 0        |
| 22Feb2011 | 21159 | 897.46  | 8.122101 | 4 R.FWFFGKf chr2@7020   | 2.62E-11 | 0.001279 |
| 22Feb2011 | 18970 | 931.53  | 0.362106 | 2 R.CTLLYISQ chr4@2818  | 4.20E-10 | 0.008201 |
| 22Feb2011 | 21411 | 957.5   | 22.57714 | 3 K.LFQVLQN Splice@chr  | 1.47E-10 | 0.00316  |
| 22Feb2011 | 11024 | 897.42  | -27.6753 | 3 _QVREMH Splice@chr    | 4.73E-10 | 0.009593 |
| 22Feb2011 | 5089  | 741.38  | -23.1647 | 2 K.FPENRHL chr2@1475   | 2.26E-10 | 0.004764 |
| 22Feb2011 | 23236 | 984.81  | -24.8852 | 3 K.SGTIFDNI Splice@chr | 2.60E-12 | 3.55E-04 |
| 22Feb2011 | 16619 | 792.42  | 5.26594  | 4 R.TTGVVLD chr2@1512   | 5.25E-11 | 0.001422 |
| 22Feb2011 | 22951 | 795.65  | -15.5001 | 4 K.SGTIFDNI Splice@chr | 2.95E-15 | 0        |
| 22Feb2011 | 19996 | 987.51  | 4.289691 | 3 K.KYLFLDNI chr4@1288  | 3.70E-10 | 0.00746  |
| 22Feb2011 | 11335 | 747.76  | -8.61645 | 5 S.HLPRPGH Splice@chr  | 7.61E-11 | 0.001847 |
| 22Feb2011 | 16098 | 826.48  | -13.7526 | 2 R.RVPLPEG Splice@chr  | 1.26E-12 | 1.29E-04 |
| 22Feb2011 | 20239 | 644.4   | -15.5206 | 2 K.KIIISDFLP chr5@1401 | 4.45E-10 | 0.008662 |
| 22Feb2011 | 6858  | 434.24  | 13.9946  | 3 _RSNDQTI chr5@6378    | 3.27E-10 | 0.006698 |
| 22Feb2011 | 16012 | 490.74  | -7.60235 | 2 K.DITMEIM chr3@1481   | 1.98E-10 | 0.004547 |
| 22Feb2011 | 25741 | 770.77  | -11.1838 | 3 K.YLDAK+1 chr4@3751   | 3.90E-10 | 0.007907 |
| 22Feb2011 | 7968  | 1089.65 | -29.1532 | 1 K.KLKSMKN chr5@3701   | 1.70E-10 | 0.003899 |
| 22Feb2011 | 15947 | 490.74  | -7.60235 | 2 K.DITMEIM chr3@1481   | 1.15E-10 | 0.002509 |
| 22Feb2011 | 16678 | 792.42  | 5.26594  | 4 R.TTGVVLD chr2@1512   | 1.18E-10 | 0.002765 |
| 22Feb2011 | 14807 | 833.93  | -9.2006  | 2 _IIEPYVAV Splice@chr  | 2.13E-10 | 0.004764 |
| 22Feb2011 | 8211  | 696.83  | -11.9803 | 2 R.TDRTESV chr1@1452   | 1.33E-10 | 0.003009 |
| 22Feb2011 | 21961 | 634.83  | -9.39461 | 2 R.VDIGDILF Splice@chr | 3.48E-13 | 0        |
| 22Feb2011 | 25152 | 1147.24 | 4.705638 | 3 R.FQSAAIG Splice@chr  | 3.75E-16 | 0        |
| 22Feb2011 | 7552  | 460.25  | -17.4268 | 2 K.YPGIGGI Splice@chr  | 1.81E-10 | 0.003975 |
| 22Feb2011 | 15891 | 490.74  | -7.60235 | 2 K.DITMEIM chr3@1481   | 1.58E-10 | 0.003573 |
| 22Feb2011 | 21366 | 957.5   | 22.57714 | 3 K.LFQVLQN Splice@chr  | 1.29E-13 | 0        |
| 22Feb2011 | 4476  | 430.75  | 0.781151 | 2 K.IMTTVGP Splice@chr  | 3.89E-10 | 0.007907 |
| 22Feb2011 | 22690 | 795.65  | -15.5001 | 4 K.SGTIFDNI Splice@chr | 1.03E-13 | 0        |
| 22Feb2011 | 18696 | 554.3   | -28.4599 | 2 K.CLGLGYL chr2@9237   | 1.40E-10 | 0.00316  |
| 22Feb2011 | 21910 | 634.83  | -9.39461 | 2 R.VDIGDILF Splice@chr | 4.37E-12 | 5.61E-04 |
| 22Feb2011 | 23002 | 795.65  | -23.4135 | 4 K.SGTIFDNI Splice@chr | 4.17E-14 | 0        |
| 22Feb2011 | 24899 | 968.17  | -29.3651 | 3 R.FFYNIFAL chrX@4722  | 3.98E-10 | 0.007907 |
| 22Feb2011 | 6939  | 404.22  | 20.84272 | 2 R.TSGGGG chr1@3738    | 1.05E-10 | 0.002346 |
| 22Feb2011 | 15340 | 938.46  | 22.50833 | 2 R.ECSQSDS chr2@8876   | 1.21E-10 | 0.002765 |
| 22Feb2011 | 12496 | 851.49  | -3.4814  | 2 K.RGVRLSH chr2@2785   | 1.77E-10 | 0.003975 |
| 22Feb2011 | 8174  | 622.65  | 20.40203 | 3 K.QIEQGEA Splice@chr  | 1.19E-12 | 1.29E-04 |
| 22Feb2011 | 12589 | 662.35  | -4.61447 | 2 S.INM+15 chr4@2551    | 3.84E-10 | 0.00768  |
| 22Feb2011 | 23181 | 984.81  | -24.8852 | 3 K.SGTIFDNI Splice@chr | 3.49E-10 | 0.007236 |
| 22Feb2011 | 15396 | 938.46  | 22.50833 | 2 R.ECSQSDS chr2@8876   | 3.13E-10 | 0.006313 |
| 22Feb2011 | 24107 | 795.4   | -14.4443 | 4 K.SGTIFDNI Splice@chr | 3.43E-15 | 0        |
| 22Feb2011 | 24296 | 929.15  | -28.8338 | 3 R.KSTAKLK chr2@8595   | 3.31E-10 | 0.00685  |
| 22Feb2011 | 19132 | 661.39  | 17.1596  | 2 R.AFIIRM+ chrX@7389   | 2.30E-10 | 0.004837 |
| 22Feb2011 | 23958 | 911.42  | 20.49399 | 2 _PRM+15 Splice@chr    | 3.28E-10 | 0.006698 |
| 22Feb2011 | 22962 | 1060.54 | -6.74128 | 3 K.SGTIFDNI Splice@chr | 4.54E-12 | 5.61E-04 |
| 22Feb2011 | 2943  | 536.29  | -10.9462 | 2 _QVEFNPI Splice@chr   | 2.26E-10 | 0.004764 |
| 22Feb2011 | 20740 | 895.78  | -1.06827 | 3 _RELTEEDI Splice@chr  | 3.14E-11 | 0.001279 |
| 22Feb2011 | 1754  | 439.91  | 17.33685 | 3 K.NSQKNPI chr2@3540   | 4.72E-10 | 0.009593 |

|           |       |         |          |                          |          |          |
|-----------|-------|---------|----------|--------------------------|----------|----------|
| 22Feb2011 | 16375 | 1056.56 | 28.0642  | 3 I.SRVEDDS( Splice@chr  | 1.42E-14 | 0        |
| 22Feb2011 | 21182 | 1003.18 | 7.145987 | 3 R.CWNRRA Splice@chr    | 7.24E-13 | 0        |
| 22Feb2011 | 18412 | 1059.82 | -11.3751 | 3 I.SRSAAMF Splice@chr   | 3.84E-18 | 0        |
| 22Feb2011 | 16723 | 888.47  | 22.8338  | 2 K.DITLEVEA Splice@chr  | 6.85E-11 | 0.001847 |
| 22Feb2011 | 8830  | 606.3   | -17.646  | 2 R.MLNFLSC chr2@1612    | 3.65E-10 | 0.00746  |
| 22Feb2011 | 14317 | 833.93  | -9.2006  | 2 _..IIEPYVAV Splice@chr | 2.77E-10 | 0.005262 |
| 22Feb2011 | 24574 | 860.69  | 14.08015 | 4 R.FQSAAIG Splice@chr   | 2.97E-12 | 1.20E-04 |
| 22Feb2011 | 14625 | 858.48  | 6.006088 | 3 _..LETGIKPI Splice@chr | 1.37E-12 | 0        |
| 22Feb2011 | 22991 | 795.4   | -22.3578 | 4 K.SGTIFDNI Splice@chr  | 6.38E-14 | 0        |
| 22Feb2011 | 24540 | 860.68  | 2.433027 | 4 R.FQSAAIG Splice@chr   | 5.87E-10 | 0.009922 |
| 22Feb2011 | 23738 | 795.65  | -15.5001 | 4 K.SGTIFDNI Splice@chr  | 6.40E-16 | 0        |
| 22Feb2011 | 5136  | 456.29  | -1.0042  | 2 R.RAAAPLR Splice@chr   | 2.37E-10 | 0.004152 |
| 22Feb2011 | 6758  | 533.82  | 16.26677 | 2 K.TNIYTILTI chr5@1329  | 1.21E-10 | 0.002276 |
| 22Feb2011 | 7571  | 1089.65 | -29.1532 | 1 K.KLKSMKN chr5@3701    | 4.06E-11 | 7.21E-04 |
| 22Feb2011 | 21558 | 634.83  | -9.39461 | 2 R.VDIGDILF Splice@chr  | 4.63E-13 | 0        |
| 22Feb2011 | 18070 | 1167.55 | -25.3067 | 2 L.K+14.016 Splice@chr  | 3.66E-13 | 0        |
| 22Feb2011 | 14698 | 762.42  | 3.25006  | 2 _..MK+14.0 chr4@7749   | 5.41E-10 | 0.008901 |
| 22Feb2011 | 20838 | 649.9   | -9.68814 | 2 K.LKIITNLEI chr2@6716  | 2.87E-10 | 0.005776 |
| 22Feb2011 | 16201 | 792.42  | 5.26594  | 4 R.TTGVVLD chr2@1512    | 1.03E-10 | 0.002213 |
| 22Feb2011 | 16009 | 1056.56 | 28.0642  | 3 I.SRVEDDS( Splice@chr  | 3.18E-15 | 0        |
| 22Feb2011 | 24162 | 984.81  | -24.8852 | 3 K.SGTIFDNI Splice@chr  | 1.41E-10 | 0.002439 |
| 22Feb2011 | 6700  | 533.82  | 16.26677 | 2 K.TNIYTILTI chr5@1329  | 2.93E-10 | 0.006028 |
| 22Feb2011 | 15424 | 490.74  | -7.60235 | 2 K.DITMEIM chr3@1481    | 2.83E-10 | 0.005341 |
| 22Feb2011 | 24566 | 688.75  | 8.895763 | 5 R.FQSAAIG Splice@chr   | 2.51E-10 | 0.00432  |
| 22Feb2011 | 16326 | 888.97  | 20.94366 | 2 K.DITLEVEA Splice@chr  | 1.20E-10 | 0.002276 |
| 22Feb2011 | 2911  | 450.77  | 18.59199 | 2 K.IEVDGVLI chrX@1251   | 3.35E-10 | 0.006499 |
| 22Feb2011 | 21617 | 634.84  | 6.410455 | 2 R.VDIGDILF Splice@chr  | 9.59E-13 | 0        |
| 22Feb2011 | 14565 | 858.47  | -5.67211 | 3 _..LETGIKPI Splice@chr | 9.34E-13 | 0        |
| 22Feb2011 | 19605 | 798.15  | -11.5616 | 4 K.SGDAGIV Splice@chr   | 2.07E-10 | 0.003462 |
| 22Feb2011 | 7515  | 1089.65 | -29.1532 | 1 K.KLKSMKN chr5@3701    | 1.23E-10 | 0.002276 |
| 22Feb2011 | 18389 | 831.95  | -16.4251 | 2 K.PM+15.9 chr3@1124    | 1.05E-10 | 0.002276 |
| 22Feb2011 | 1875  | 439.91  | 17.33685 | 3 K.NSQKNPI chr2@3540    | 5.21E-10 | 0.008748 |
| 22Feb2011 | 18094 | 1060.15 | -15.5056 | 3 I.SRSAAMF Splice@chr   | 2.57E-18 | 0        |
| 22Feb2011 | 22697 | 968.13  | 18.26018 | 3 _..GCSIVPIS Splice@chr | 5.18E-12 | 1.20E-04 |
| 22Feb2011 | 22556 | 795.65  | -23.4135 | 4 K.SGTIFDNI Splice@chr  | 2.70E-13 | 0        |
| 22Feb2011 | 14096 | 887.93  | 29.43791 | 2 I.DEREESTA Splice@chr  | 1.55E-10 | 0.002514 |
| 22Feb2011 | 18146 | 1060.15 | -15.5056 | 3 I.SRSAAMF Splice@chr   | 5.55E-17 | 0        |
| 22Feb2011 | 15482 | 490.74  | -7.60235 | 2 K.DITMEIM chr3@1481    | 3.16E-10 | 0.006442 |
| 22Feb2011 | 13784 | 623.03  | -18.2266 | 3 P.RNWGKC chrX@1446     | 4.20E-10 | 0.007689 |
| 22Feb2011 | 11744 | 671.37  | -24.0361 | 2 T.FNIVHTQ Splice@chr   | 1.69E-10 | 0.002865 |
| 22Feb2011 | 18126 | 1167.55 | -25.3067 | 2 L.K+14.016 Splice@chr  | 7.01E-13 | 0        |
| 22Feb2011 | 19925 | 1003.52 | 12.6889  | 3 R.CWNRRA Splice@chr    | 6.57E-13 | 0        |
| 22Feb2011 | 7030  | 493.78  | -11.3951 | 2 R.KNQENLI Splice@chr   | 2.32E-10 | 0.00407  |
| 22Feb2011 | 18000 | 742.88  | -6.21424 | 2 K.M+15.99 chr4@1648    | 1.00E-10 | 0.002213 |
| 22Feb2011 | 6401  | 434.24  | 13.9946  | 3 _..RSNDQTI chr5@6378   | 3.77E-10 | 0.007299 |
| 22Feb2011 | 21000 | 957.5   | 22.57714 | 3 K.LFQVLQN Splice@chr   | 1.05E-10 | 0.002276 |
| 22Feb2011 | 4221  | 741.38  | -23.1647 | 2 K.FPENRHI/ chr2@1477   | 1.86E-10 | 0.003028 |

|           |       |         |          |                          |          |          |
|-----------|-------|---------|----------|--------------------------|----------|----------|
| 22Feb2011 | 23928 | 929.15  | -28.8338 | 3 R.KSTAKLK\ chr2@8595   | 2.97E-10 | 0.006108 |
| 22Feb2011 | 22507 | 984.81  | -24.8852 | 3 K.SGTIFDNI Splice@chr  | 9.00E-12 | 2.28E-04 |
| 22Feb2011 | 14863 | 938.46  | 22.50833 | 2 R.ECSQSDS chr2@8876    | 7.99E-11 | 0.001662 |
| 22Feb2011 | 21512 | 634.83  | -9.39461 | 2 R.VDIGDILF Splice@chr  | 1.26E-12 | 0        |
| 22Feb2011 | 10695 | 747.57  | 5.690177 | 5 S.HLPRPGH Splice@chr   | 4.76E-10 | 0.008301 |
| 22Feb2011 | 16309 | 792.42  | 5.26594  | 4 R.TTGVVLD chr2@1512    | 2.71E-10 | 0.005091 |
| 22Feb2011 | 14917 | 938.46  | 22.50833 | 2 R.ECSQSDS chr2@8876    | 9.11E-11 | 0.001845 |
| 22Feb2011 | 17944 | 742.88  | -6.21424 | 2 K.M+15.99 chr4@1648    | 1.88E-10 | 0.003028 |
| 22Feb2011 | 4280  | 741.38  | -23.1647 | 2 K.FPENRHI\ chr2@1477   | 1.46E-10 | 0.002514 |
| 22Feb2011 | 25725 | 760.4   | -4.0463  | 3 \_TQTNTKI\ chrX@7978   | 5.63E-10 | 0.009383 |
| 22Feb2011 | 16930 | 760.72  | 18.35362 | 3 R.RAINGTE Splice@chr   | 2.47E-10 | 0.004235 |
| 22Feb2011 | 12498 | 516.29  | 9.357636 | 2 K.VSVDVLE chrX@1218    | 5.74E-10 | 0.009548 |
| 22Feb2011 | 14513 | 858.47  | -5.67211 | 3 \_LETGIKPI Splice@chr  | 9.88E-12 | 2.28E-04 |
| 22Feb2011 | 4166  | 741.38  | -23.1647 | 2 K.FPENRHI\ chr2@1477   | 3.83E-10 | 0.007299 |
| 22Feb2011 | 8659  | 821.44  | 15.92055 | 1 K.TGFGING chrX@2647    | 1.96E-10 | 0.003286 |
| 22Feb2011 | 17281 | 722.45  | -4.95112 | 2 R.RK+14.01 Splice@chr  | 4.70E-10 | 0.008228 |
| 22Feb2011 | 22559 | 984.82  | -14.7074 | 3 K.SGTIFDNI Splice@chr  | 1.43E-11 | 3.29E-04 |
| 22Feb2011 | 24512 | 1062.62 | 12.79939 | 2 E.EYFFRNL\ chrX@1001   | 2.02E-10 | 0.003286 |
| 22Feb2011 | 22842 | 984.81  | -24.8852 | 3 K.SGTIFDNI Splice@chr  | 1.33E-11 | 3.29E-04 |
| 22Feb2011 | 10079 | 595.33  | 16.43181 | 3 R.DECYASK Splice@chr   | 3.98E-11 | 7.21E-04 |
| 22Feb2011 | 20527 | 1007.86 | 15.19559 | 3 R.CWNRRA Splice@chr    | 9.63E-11 | 0.002125 |
| 22Feb2011 | 17063 | 820.39  | -23.8985 | 4 R.TTGVVLD Splice@chr   | 2.26E-10 | 0.003993 |
| 22Feb2011 | 23549 | 795.65  | -15.5001 | 4 K.SGTIFDNI Splice@chr  | 2.69E-13 | 0        |
| 22Feb2011 | 23865 | 911.42  | 20.49399 | 2 \_PRM+15. Splice@chr   | 3.60E-10 | 0.005987 |
| 22Feb2011 | 5881  | 407.7   | 9.830142 | 2 R.YEMMIK. chr3@1222    | 5.92E-10 | 0.009731 |
| 22Feb2011 | 16363 | 983.96  | -5.49698 | 2 R.SFSTIPDS chr2@1305   | 3.17E-13 | 0        |
| 22Feb2011 | 16004 | 1056.22 | 29.33653 | 3 R.TTGVVLD Splice@chr   | 1.33E-12 | 1.10E-04 |
| 22Feb2011 | 3130  | 526.78  | -3.83085 | 2 K.KLDLNM\ chr2@7182    | 1.80E-10 | 0.003057 |
| 22Feb2011 | 13889 | 801.7   | -6.78619 | 3 K.FFKPNTD chr5@7527    | 1.01E-14 | 0        |
| 22Feb2011 | 7289  | 1025.61 | -11.6755 | 1 K.LGLGSGL chr5@4945    | 2.70E-11 | 3.94E-04 |
| 22Feb2011 | 22847 | 792.15  | -18.5783 | 4 K.SGTIFDNI Splice@chr  | 1.30E-18 | 0        |
| 22Feb2011 | 3623  | 741.38  | -23.1647 | 2 K.FPENRHI\ chr2@1477   | 4.72E-10 | 0.008298 |
| 22Feb2011 | 12346 | 662.84  | -22.194  | 2 S.INM+15.5 chr4@2551   | 5.96E-10 | 0.009809 |
| 22Feb2011 | 23219 | 650.33  | 3.503627 | 4 \_VLPEGSIS Splice@chr  | 1.10E-10 | 0.001812 |
| 22Feb2011 | 21362 | 1007.85 | 5.172966 | 3 R.CWNRRA Splice@chr    | 2.80E-10 | 0.004641 |
| 22Feb2011 | 3712  | 531.29  | -6.73762 | 2 K.MPMGV\ chr2@6727     | 1.80E-10 | 0.003057 |
| 22Feb2011 | 4944  | 456.29  | -1.0042  | 2 R.RAAAPLR Splice@chr   | 1.40E-10 | 0.002315 |
| 22Feb2011 | 13947 | 801.7   | -6.78619 | 3 K.FFKPNTD chr5@7527    | 2.91E-14 | 0        |
| 22Feb2011 | 23069 | 795.65  | -23.4135 | 4 K.SGTIFDNI Splice@chr  | 4.36E-12 | 1.10E-04 |
| 22Feb2011 | 16385 | 916.54  | 15.7335  | 1 K.FPGDVLL chr1@1206    | 2.77E-10 | 0.004641 |
| 22Feb2011 | 21505 | 957.49  | -8.50821 | 3 R.FIEPIEDIF Splice@chr | 2.82E-10 | 0.004641 |
| 22Feb2011 | 18042 | 818.16  | 2.484952 | 4 S.DFFPTEQ Splice@chr   | 1.17E-13 | 0        |
| 22Feb2011 | 5002  | 456.29  | -1.0042  | 2 R.RAAAPLR Splice@chr   | 1.89E-10 | 0.003139 |
| 22Feb2011 | 9729  | 879.47  | 21.53913 | 1 R.YNRAPM chr5@4305     | 2.28E-10 | 0.003781 |
| 22Feb2011 | 16402 | 888.97  | 20.94366 | 2 K.DITLEVE\ Splice@chr  | 1.45E-11 | 3.94E-04 |
| 22Feb2011 | 21422 | 1007.85 | 5.172966 | 3 R.CWNRRA Splice@chr    | 8.04E-11 | 0.001384 |
| 22Feb2011 | 21215 | 1007.85 | 5.172966 | 3 R.CWNRRA Splice@chr    | 4.16E-10 | 0.006827 |

|           |       |         |          |                         |          |          |
|-----------|-------|---------|----------|-------------------------|----------|----------|
| 22Feb2011 | 21211 | 1003.18 | 7.145987 | 3 R.CWNRRRA Splice@chr  | 1.51E-13 | 0        |
| 22Feb2011 | 24504 | 929.15  | -28.8338 | 3 R.KSTAKLK chr2@8595   | 3.69E-10 | 0.006139 |
| 22Feb2011 | 21946 | 634.83  | -9.39461 | 2 R.VDIGDILF Splice@chr | 3.38E-12 | 1.10E-04 |
| 22Feb2011 | 8356  | 724.34  | 5.400383 | 3 V.CLTEEGK Splice@chr  | 4.36E-10 | 0.00737  |
| 22Feb2011 | 16626 | 792.42  | 5.26594  | 4 R.TTGVVLD chr2@1512   | 3.19E-11 | 3.94E-04 |
| 22Feb2011 | 19743 | 828.87  | -1.01339 | 4 S.EDLGSDA Splice@chr  | 6.19E-15 | 0        |
| 22Feb2011 | 16358 | 785.42  | 22.95449 | 1 _MPAWAF chr2@1115     | 1.43E-10 | 0.002484 |
| 22Feb2011 | 3773  | 531.29  | -6.73762 | 2 K.MPMGV chr2@6727     | 1.90E-10 | 0.003226 |
| 22Feb2011 | 17985 | 818.16  | 2.484952 | 4 S.DFFPTEQ Splice@chr  | 8.88E-12 | 1.10E-04 |
| 22Feb2011 | 24390 | 795.65  | -23.4135 | 4 K.SGTIFDNI Splice@chr | 4.57E-12 | 1.10E-04 |
| 22Feb2011 | 18102 | 818.16  | 2.484952 | 4 S.DFFPTEQ Splice@chr  | 1.62E-11 | 3.94E-04 |
| 22Feb2011 | 23121 | 795.65  | -23.4135 | 4 K.SGTIFDNI Splice@chr | 8.68E-13 | 1.10E-04 |
| 22Feb2011 | 16656 | 1056.22 | 29.33653 | 3 R.TTGVVLD Splice@chr  | 6.33E-15 | 0        |
| 22Feb2011 | 23494 | 1015.49 | -29.2989 | 2 R.FMNSSK chr2@8237    | 4.20E-10 | 0.006907 |
| 22Feb2011 | 20839 | 1007.85 | 5.172966 | 3 R.CWNRRRA Splice@chr  | 3.68E-10 | 0.006139 |
| 22Feb2011 | 16423 | 983.96  | -5.49698 | 2 R.SFSTIPDS chr2@1305  | 6.63E-14 | 0        |
| 22Feb2011 | 7464  | 696.83  | -11.9803 | 2 R.TDRTESV chr1@1452   | 2.79E-10 | 0.004641 |
| 22Feb2011 | 8942  | 444.23  | 7.06905  | 3 K.TSGELSHI chr4@2396  | 5.43E-10 | 0.009138 |
| 22Feb2011 | 21896 | 634.83  | -9.39461 | 2 R.VDIGDILF Splice@chr | 3.49E-12 | 1.10E-04 |
| 22Feb2011 | 24442 | 795.65  | -23.4135 | 4 K.SGTIFDNI Splice@chr | 4.02E-14 | 0        |
| 22Feb2011 | 18318 | 1059.81 | -20.7519 | 3 I.SRSAAMF Splice@chr  | 1.06E-14 | 0        |
| 22Feb2011 | 20269 | 864.94  | 10.49869 | 2 R.KSSTLMR chr4@1655   | 3.67E-11 | 4.88E-04 |
| 22Feb2011 | 25290 | 688.75  | 8.895763 | 5 R.FQSAAIG Splice@chr  | 1.12E-10 | 0.001897 |
| 22Feb2011 | 23170 | 795.65  | -23.4135 | 4 K.SGTIFDNI Splice@chr | 3.04E-14 | 0        |
| 22Feb2011 | 16720 | 1056.22 | 29.33653 | 3 R.TTGVVLD Splice@chr  | 2.05E-10 | 0.003377 |
| 22Feb2011 | 11290 | 747.56  | -7.71771 | 5 S.HLPRPGH Splice@chr  | 1.12E-10 | 0.001897 |
| 22Feb2011 | 25328 | 1147.24 | 4.705638 | 3 R.FQSAAIG Splice@chr  | 3.82E-15 | 0        |
| 22Feb2011 | 15062 | 762.43  | 16.40509 | 2 _MK+14.0 chr4@7745    | 5.76E-10 | 0.009509 |
| 22Feb2011 | 19527 | 871.15  | -18.7982 | 3 R.PMSTPPT chr2@4610   | 3.29E-10 | 0.005598 |
| 22Feb2011 | 25242 | 1147.24 | 4.705638 | 3 R.FQSAAIG Splice@chr  | 3.78E-16 | 0        |
| 22Feb2011 | 2472  | 700.32  | -25.4848 | 1 R.ENPGAGI chr5@1375   | 3.60E-10 | 0.006069 |
| 22Feb2011 | 16852 | 1092.53 | 14.31508 | 3 K.LDEHFPL Splice@chr  | 1.03E-11 | 1.10E-04 |
| 22Feb2011 | 256   | 594.8   | -20.0434 | 2 R.KMGIEAC chr2@1114   | 5.75E-10 | 0.009509 |
| 22Feb2011 | 17344 | 820.39  | -23.8985 | 4 R.TTGVVLD Splice@chr  | 3.40E-10 | 0.005756 |
| 22Feb2011 | 21268 | 1003.18 | 7.145987 | 3 R.CWNRRRA Splice@chr  | 4.26E-12 | 1.10E-04 |
| 22Feb2011 | 3562  | 741.38  | -23.1647 | 2 K.FPENRHI chr2@1477   | 2.09E-10 | 0.003539 |
| 22Feb2011 | 26012 | 828.38  | -20.1128 | 2 K.PNLK+14 chr2@3862   | 1.16E-10 | 0.001984 |
| 22Feb2011 | 15610 | 490.74  | -7.60235 | 2 K.DITMEIM chr3@1481   | 1.53E-10 | 0.00273  |
| 22Feb2011 | 19924 | 798.15  | -11.5616 | 4 K.SGDAGIV Splice@chr  | 3.17E-10 | 0.00544  |
| 22Feb2011 | 16342 | 888.47  | 22.8338  | 2 K.DITLEVEA Splice@chr | 6.96E-11 | 0.001124 |
| 22Feb2011 | 11026 | 626.3   | -9.76097 | 2 K.SEELMYN chr4@2675   | 2.37E-12 | 1.10E-04 |
| 22Feb2011 | 18369 | 1060.15 | -15.5056 | 3 I.SRSAAMF Splice@chr  | 2.95E-18 | 0        |
| 22Feb2011 | 3683  | 741.38  | -23.1647 | 2 K.FPENRHI chr2@1477   | 2.47E-10 | 0.003925 |
| 22Feb2011 | 12433 | 851.48  | -15.2578 | 2 K.RGVRLSH chr2@2785   | 4.58E-10 | 0.007763 |
| 22Feb2011 | 20214 | 864.95  | 22.09183 | 2 R.KSSTLMR chr4@1655   | 6.11E-12 | 1.10E-04 |
| 22Feb2011 | 11664 | 827.76  | -26.7586 | 3 K.NNRKHTI chr5@2125   | 1.49E-10 | 0.00273  |
| 22Feb2011 | 15164 | 938.46  | 22.50833 | 2 R.ECSQSDS chr2@8876   | 9.12E-11 | 0.001465 |

|           |       |         |          |                         |          |          |
|-----------|-------|---------|----------|-------------------------|----------|----------|
| 22Feb2011 | 12375 | 851.48  | -15.2578 | 2 K.RGVRLSH chr2@2785   | 2.17E-10 | 0.003619 |
| 22Feb2011 | 20318 | 1003.18 | 7.145987 | 3 R.CWNRRA Splice@chr   | 5.09E-11 | 6.72E-04 |
| 22Feb2011 | 7536  | 494.27  | -15.467  | 2 R.KNEENLII chr1@9396  | 2.33E-10 | 0.003861 |
| 22Feb2011 | 17740 | 722.45  | -4.95112 | 2 R.RK+14.01 Splice@chr | 3.88E-10 | 0.006369 |
| 22Feb2011 | 20408 | 1003.18 | 7.145987 | 3 R.CWNRRA Splice@chr   | 1.29E-12 | 0        |
| 22Feb2011 | 2648  | 460.72  | 10.9535  | 2 R.MGMDPI Splice@chr   | 4.29E-10 | 0.008342 |
| 22Feb2011 | 12615 | 851.48  | -15.2578 | 2 K.RGVRLSH chr2@2785   | 1.06E-10 | 0.002458 |
| 22Feb2011 | 15939 | 622.33  | 9.587405 | 2 R.AK+14.01 chr2@4270  | 1.93E-10 | 0.003482 |
| 22Feb2011 | 22631 | 763.14  | 20.21827 | 3 K.TK+14.01 chrX@1037  | 3.17E-10 | 0.007038 |
| 22Feb2011 | 4016  | 487.3   | 24.66358 | 2 K.LQTSNGL Splice@chr  | 2.21E-10 | 0.004215 |
| 22Feb2011 | 13429 | 1115.1  | 6.276672 | 2 S.LYSSCPC chrX@1175   | 3.10E-10 | 0.006717 |
| 22Feb2011 | 16461 | 759.4   | -15.0495 | 2 K.FIDANLQ chr4@8206   | 4.43E-10 | 0.008342 |
| 22Feb2011 | 22747 | 795.65  | -23.4135 | 4 K.SGTIFDNI Splice@chr | 2.97E-12 | 1.19E-04 |
| 22Feb2011 | 8712  | 718.36  | -11.9967 | 2 F.EILAENM Splice@chr  | 2.75E-10 | 0.005675 |
| 22Feb2011 | 3959  | 411.55  | -26.8589 | 3 K.ALQM+1! chr3@1125   | 3.43E-10 | 0.007415 |
| 22Feb2011 | 19969 | 1063.86 | -15.3899 | 3 K.SGDAGIV Splice@chr  | 3.67E-10 | 0.007635 |
| 22Feb2011 | 16977 | 888.97  | 20.94366 | 2 K.DITLEVEA Splice@chr | 9.32E-12 | 4.32E-04 |
| 22Feb2011 | 20539 | 1007.86 | 15.19559 | 3 R.CWNRRA Splice@chr   | 1.31E-10 | 0.002699 |
| 22Feb2011 | 22984 | 795.65  | -23.4135 | 4 K.SGTIFDNI Splice@chr | 1.91E-13 | 0        |
| 22Feb2011 | 6970  | 434.24  | 13.9946  | 3 _RSNDQTI chr5@6378    | 4.22E-10 | 0.008342 |
| 22Feb2011 | 6119  | 559.32  | -24.6715 | 2 _LSAKVCG chr4@7051    | 3.06E-10 | 0.006475 |
| 22Feb2011 | 15142 | 858.47  | -5.67211 | 3 _LETGIKPI Splice@chr  | 6.37E-14 | 0        |
| 22Feb2011 | 11666 | 626.31  | 6.247018 | 2 K.SEELMYN chr4@2675   | 2.02E-12 | 1.19E-04 |
| 22Feb2011 | 18547 | 1059.81 | -20.7519 | 3 I.SRSAAMF Splice@chr  | 9.83E-16 | 0        |
| 22Feb2011 | 22031 | 767.74  | -27.8985 | 3 K.TFLKNPK' chr3@1045  | 3.81E-10 | 0.007867 |
| 22Feb2011 | 19948 | 798.15  | -11.5616 | 4 K.SGDAGIV Splice@chr  | 3.95E-10 | 0.008237 |
| 22Feb2011 | 14317 | 801.7   | -6.78619 | 3 K.FFKPNTD chr5@7527   | 1.11E-13 | 0        |
| 22Feb2011 | 5691  | 456.29  | -1.0042  | 2 R.RAAAPLR Splice@chr  | 3.61E-10 | 0.007563 |
| 22Feb2011 | 21505 | 957.5   | 22.57714 | 3 K.LFQVLQN Splice@chr  | 2.31E-10 | 0.004539 |
| 22Feb2011 | 12562 | 851.48  | -15.2578 | 2 K.RGVRLSH chr2@2785   | 2.77E-10 | 0.005819 |
| 22Feb2011 | 15089 | 858.47  | -5.67211 | 3 _LETGIKPI Splice@chr  | 1.14E-11 | 4.32E-04 |
| 22Feb2011 | 20692 | 1007.86 | 15.19559 | 3 R.CWNRRA Splice@chr   | 4.36E-10 | 0.008342 |
| 22Feb2011 | 21128 | 1003.18 | 7.145987 | 3 R.CWNRRA Splice@chr   | 5.83E-13 | 0        |
| 22Feb2011 | 4535  | 526.78  | -3.83085 | 2 K.KLDLNM\ chr2@7182   | 8.53E-11 | 0.002213 |
| 22Feb2011 | 18815 | 554.3   | -28.4599 | 2 K.CLGLGYL chr2@9237   | 7.26E-11 | 0.002056 |
| 22Feb2011 | 23134 | 968.13  | 18.26018 | 3 _GCSIVPIS Splice@chr  | 5.81E-12 | 2.26E-04 |
| 22Feb2011 | 23138 | 650.08  | 4.795781 | 4 _VLPEGSIS Splice@chr  | 1.61E-10 | 0.003172 |
| 22Feb2011 | 4099  | 417.22  | 24.63685 | 2 K.SVENSAA chr2@1335   | 2.96E-10 | 0.006235 |
| 22Feb2011 | 4935  | 741.38  | -23.1647 | 2 K.FPENRHI\ chr2@1477  | 4.94E-10 | 0.009099 |
| 22Feb2011 | 1618  | 584.29  | -24.6946 | 2 R.FSLKNTEI chr4@2692  | 3.22E-10 | 0.007038 |
| 22Feb2011 | 21315 | 1007.85 | 5.172966 | 3 R.CWNRRA Splice@chr   | 4.30E-11 | 8.72E-04 |
| 22Feb2011 | 16373 | 792.42  | 5.26594  | 4 R.TTGVLVD chr2@1512   | 3.39E-10 | 0.00726  |
| 22Feb2011 | 16123 | 490.74  | -7.60235 | 2 K.DITMEIM chr3@1481   | 3.89E-10 | 0.008191 |
| 22Feb2011 | 15899 | 679.02  | 15.8828  | 3 K.M+15.99 Splice@chr  | 5.15E-10 | 0.00948  |
| 22Feb2011 | 19735 | 672.59  | -4.41756 | 5 R.KVSNVQ\ chr5@8812   | 2.27E-11 | 6.96E-04 |
| 22Feb2011 | 11607 | 626.31  | 6.247018 | 2 K.SEELMYN chr4@2675   | 1.16E-12 | 0        |
| 22Feb2011 | 13479 | 859.14  | 2.870693 | 3 _LRFKDNC chrX@1055    | 4.61E-10 | 0.008401 |

|           |       |         |          |                          |          |          |
|-----------|-------|---------|----------|--------------------------|----------|----------|
| 22Feb2011 | 25033 | 860.69  | 14.08015 | 4 R.FQSAAIG Splice@chr   | 8.79E-14 | 0        |
| 22Feb2011 | 25032 | 1147.24 | 4.705638 | 3 R.FQSAAIG Splice@chr   | 1.59E-14 | 0        |
| 22Feb2011 | 14452 | 484.27  | -10.2722 | 3 K.ISSAIAMF Splice@chr  | 2.66E-11 | 6.96E-04 |
| 22Feb2011 | 15202 | 858.47  | -5.67211 | 3 _LETGIKPI Splice@chr   | 1.50E-11 | 6.35E-04 |
| 22Feb2011 | 7331  | 533.82  | 16.26677 | 2 K.TNIYTILTI chr5@1329  | 3.93E-10 | 0.008237 |
| 22Feb2011 | 24634 | 984.81  | -24.8852 | 3 K.SGTIFDNI Splice@chr  | 2.73E-12 | 1.19E-04 |
| 22Feb2011 | 21263 | 1007.85 | 5.172966 | 3 R.CWNRRA Splice@chr    | 1.79E-11 | 6.96E-04 |
| 22Feb2011 | 17900 | 722.45  | -4.95112 | 2 R.RK+14.01 Splice@chr  | 2.82E-10 | 0.005819 |
| 22Feb2011 | 18494 | 1060.14 | -25.0362 | 3 I.SRSAAMF Splice@chr   | 7.87E-18 | 0        |
| 22Feb2011 | 10512 | 596.68  | -18.3066 | 3 K.YVVILNG\ chrX@1642   | 2.35E-10 | 0.004539 |
| 22Feb2011 | 20734 | 694.87  | 2.550973 | 2 K.YHNITLQ chrX@3836    | 4.35E-10 | 0.008342 |
| 22Feb2011 | 4748  | 756.42  | -22.2995 | 1 R.PLSAAAA chr5@3132    | 4.63E-10 | 0.008401 |
| 22Feb2011 | 19742 | 953.26  | 21.08789 | 4 _CSSFFFKL chr4@1457    | 2.73E-10 | 0.005424 |
| 22Feb2011 | 260   | 536.29  | -10.9462 | 2 _QVEFNPII Splice@chr   | 1.38E-10 | 0.003022 |
| 22Feb2011 | 4587  | 526.78  | -3.83085 | 2 K.KLDLNM\ chr2@7182    | 2.19E-11 | 6.96E-04 |
| 22Feb2011 | 19628 | 672.59  | -4.41756 | 5 R.KVSNVQ\ chr5@8812    | 7.63E-11 | 0.002056 |
| 22Feb2011 | 14918 | 833.93  | -9.2006  | 2 _IIEPYVAM Splice@chr   | 1.46E-10 | 0.003022 |
| 22Feb2011 | 24946 | 1147.24 | 4.705638 | 3 R.FQSAAIG Splice@chr   | 2.48E-17 | 0        |
| 22Feb2011 | 24363 | 929.15  | -28.8338 | 3 R.KSTAKLK\ chr2@8595   | 2.81E-10 | 0.005819 |
| 22Feb2011 | 21038 | 1007.85 | 5.172966 | 3 R.CWNRRA Splice@chr    | 4.59E-12 | 2.26E-04 |
| 22Feb2011 | 25010 | 688.75  | 8.895763 | 5 R.FQSAAIG Splice@chr   | 2.34E-10 | 0.004539 |
| 22Feb2011 | 21992 | 634.84  | 6.410455 | 2 R.VDIGDILF Splice@chr  | 6.12E-13 | 0        |
| 22Feb2011 | 7263  | 428.22  | -22.9543 | 2 K.SEAHAHI chrX@1419    | 3.07E-10 | 0.006636 |
| 22Feb2011 | 17963 | 722.45  | -4.95112 | 2 R.RK+14.01 Splice@chr  | 2.75E-10 | 0.005819 |
| 22Feb2011 | 7029  | 434.24  | 13.9946  | 3 _RSNDQTI chr5@6378     | 8.96E-11 | 0.002213 |
| 22Feb2011 | 4881  | 741.38  | -23.1647 | 2 K.FPENRHI\ chr2@1477   | 2.29E-10 | 0.004382 |
| 22Feb2011 | 3982  | 417.22  | 24.63685 | 2 K.SVENSAA chr2@1335    | 3.37E-10 | 0.00718  |
| 22Feb2011 | 21942 | 634.84  | 6.410455 | 2 R.VDIGDILF Splice@chr  | 7.86E-13 | 0        |
| 22Feb2011 | 24815 | 968.17  | -29.3651 | 3 R.FFYNIFAL chrX@4722   | 2.57E-10 | 0.004772 |
| 22Feb2011 | 4647  | 526.78  | -3.83085 | 2 K.KLDLNM\ chr2@7182    | 2.19E-11 | 6.96E-04 |
| 22Feb2011 | 22424 | 795.65  | -23.4135 | 4 K.SGTIFDNI Splice@chr  | 6.97E-13 | 1.35E-04 |
| 22Feb2011 | 18037 | 1090.55 | 8.013909 | 3 S.DFFPTEQ Splice@chr   | 5.40E-10 | 0.009996 |
| 22Feb2011 | 9858  | 688.03  | -17.0347 | 3 L.IFK+14.01 chr3@8836  | 4.96E-11 | 0.002096 |
| 22Feb2011 | 20290 | 1007.86 | 15.19559 | 3 R.CWNRRA Splice@chr    | 2.81E-10 | 0.006342 |
| 22Feb2011 | 948   | 412.23  | 25.3069  | 2 R.IASYQGG chrX@1679    | 6.49E-11 | 0.00244  |
| 22Feb2011 | 16497 | 792.42  | 5.26594  | 4 R.TTGVVLD chr2@1512    | 3.34E-14 | 0        |
| 22Feb2011 | 12971 | 724.06  | 2.506414 | 3 R.NELEVFK chr1@1385    | 3.68E-10 | 0.007364 |
| 22Feb2011 | 20401 | 833.03  | -7.90042 | 3 K.ENDIECV\ Splice@chr  | 4.90E-14 | 0        |
| 22Feb2011 | 24472 | 688.75  | 8.895763 | 5 R.FQSAAIG Splice@chr   | 2.42E-11 | 0.001587 |
| 22Feb2011 | 4291  | 526.78  | -3.83085 | 2 K.KLDLNM\ chr2@7182    | 2.19E-11 | 0.001502 |
| 22Feb2011 | 2190  | 403.72  | -6.21393 | 2 _VSASSSIR chr5@1478    | 5.14E-10 | 0.009351 |
| 22Feb2011 | 20885 | 1003.18 | 7.145987 | 3 R.CWNRRA Splice@chr    | 1.36E-12 | 1.35E-04 |
| 22Feb2011 | 16560 | 888.97  | 20.94366 | 2 K.DITLEVEA\ Splice@chr | 6.00E-11 | 0.00244  |
| 22Feb2011 | 3451  | 417.22  | 24.63685 | 2 K.SVENSAA chr2@1335    | 2.53E-10 | 0.005773 |
| 22Feb2011 | 11299 | 626.31  | 6.247018 | 2 K.SEELMYN chr4@2675    | 2.60E-12 | 3.82E-04 |
| 22Feb2011 | 20526 | 1007.86 | 15.19559 | 3 R.CWNRRA Splice@chr    | 4.54E-11 | 0.002096 |
| 22Feb2011 | 17485 | 635.34  | 18.57072 | 2 K.NCLKAEN chr2@3509    | 3.39E-10 | 0.00705  |

|           |       |         |          |                          |          |          |
|-----------|-------|---------|----------|--------------------------|----------|----------|
| 22Feb2011 | 8875  | 821.44  | 15.92055 | 1 K.TGFGING chrX@2647    | 4.71E-10 | 0.009011 |
| 22Feb2011 | 14914 | 858.48  | 6.006088 | 3 _..LETGIKPI Splice@chr | 6.56E-13 | 1.35E-04 |
| 22Feb2011 | 18217 | 1060.15 | -15.5056 | 3 I.SRSAAMF Splice@chr   | 1.80E-16 | 0        |
| 22Feb2011 | 12286 | 851.49  | -3.4814  | 2 K.RGVRLSH chr2@2785    | 1.76E-10 | 0.004107 |
| 22Feb2011 | 18161 | 1060.15 | -15.5056 | 3 I.SRSAAMF Splice@chr   | 4.24E-18 | 0        |
| 22Feb2011 | 10687 | 897.42  | -27.6753 | 3 _..QVREMH Splice@chr   | 1.91E-10 | 0.004699 |
| 22Feb2011 | 19999 | 1003.19 | 17.13413 | 3 R.CWNRRA Splice@chr    | 3.73E-13 | 1.35E-04 |
| 22Feb2011 | 8226  | 599.62  | 1.63138  | 3 R.NAEAAAT Splice@chr   | 4.46E-14 | 0        |
| 22Feb2011 | 1119  | 412.23  | 25.3069  | 2 R.IASYQGG chrX@1679    | 1.87E-10 | 0.004699 |
| 22Feb2011 | 17551 | 722.45  | -4.95112 | 2 R.RK+14.01 Splice@chr  | 2.45E-10 | 0.005616 |
| 22Feb2011 | 22934 | 984.81  | -24.8852 | 3 K.SGTIFDNI Splice@chr  | 4.03E-11 | 0.002036 |
| 22Feb2011 | 1081  | 574.77  | -16.2754 | 2 K.IMADSIT chr4@4334    | 9.07E-11 | 0.002882 |
| 22Feb2011 | 1083  | 412.23  | 25.3069  | 2 R.IASYQGG chrX@1679    | 4.67E-11 | 0.002096 |
| 22Feb2011 | 21153 | 957.5   | 22.57714 | 3 K.LFQVLQN Splice@chr   | 1.36E-11 | 0.001113 |
| 22Feb2011 | 19190 | 747.41  | 11.74382 | 2 V.EK+14.01 Splice@chr  | 1.66E-10 | 0.004029 |
| 22Feb2011 | 4446  | 756.42  | -22.2995 | 1 R.PLSAAAA chr5@3132    | 5.28E-10 | 0.009513 |
| 22Feb2011 | 2231  | 403.72  | -6.21393 | 2 _..VSASSSIR chr5@1478  | 2.96E-10 | 0.006414 |
| 22Feb2011 | 12338 | 851.48  | -15.2578 | 2 K.RGVRLSH chr2@2785    | 2.23E-10 | 0.005103 |
| 22Feb2011 | 19785 | 1064.2  | -10.2401 | 3 K.SGDAGIV Splice@chr   | 5.59E-11 | 0.002096 |
| 22Feb2011 | 24495 | 688.75  | 8.895763 | 5 R.FQSAAIG Splice@chr   | 2.83E-11 | 0.001655 |
| 22Feb2011 | 4174  | 526.78  | -3.83085 | 2 K.KLDLNM chr2@7182     | 2.19E-11 | 0.001502 |
| 22Feb2011 | 24515 | 1147.25 | 13.44098 | 3 R.FQSAAIG Splice@chr   | 6.82E-14 | 0        |
| 22Feb2011 | 24510 | 860.69  | 14.08015 | 4 R.FQSAAIG Splice@chr   | 3.30E-13 | 1.35E-04 |
| 22Feb2011 | 24307 | 968.51  | -23.6218 | 3 R.FFYNIFAL chrX@4722   | 3.46E-10 | 0.007123 |
| 22Feb2011 | 8287  | 599.62  | 1.63138  | 3 R.NAEAAAT Splice@chr   | 7.62E-12 | 6.90E-04 |
| 22Feb2011 | 12968 | 516.29  | 9.357636 | 2 K.VSVDVLE chrX@1218    | 8.03E-11 | 0.002703 |
| 22Feb2011 | 23997 | 929.15  | -28.8338 | 3 R.KSTAKLK chr2@8595    | 3.83E-10 | 0.007688 |
| 22Feb2011 | 14972 | 858.47  | -5.67211 | 3 _..LETGIKPI Splice@chr | 1.17E-14 | 0        |
| 22Feb2011 | 16553 | 792.42  | 5.26594  | 4 R.TTGVVLD chr2@1512    | 2.82E-10 | 0.006342 |
| 22Feb2011 | 20936 | 1007.85 | 5.172966 | 3 R.CWNRRA Splice@chr    | 5.06E-11 | 0.002096 |
| 22Feb2011 | 22403 | 968.13  | 18.26018 | 3 _..GCSIVPIS Splice@chr | 4.99E-10 | 0.009227 |
| 22Feb2011 | 20349 | 1007.86 | 15.19559 | 3 R.CWNRRA Splice@chr    | 4.69E-10 | 0.009011 |
| 22Feb2011 | 4593  | 741.38  | -23.1647 | 2 K.FPENRHI chr2@1477    | 1.32E-10 | 0.003361 |
| 22Feb2011 | 17599 | 729.38  | -8.21201 | 2 R.TSFTFPSS chr5@7025   | 4.35E-10 | 0.008629 |
| 22Feb2011 | 15198 | 938.46  | 22.50833 | 2 R.ECSQSDS chr2@8876    | 3.96E-10 | 0.008014 |
| 22Feb2011 | 4325  | 756.43  | -9.04908 | 1 R.PLSAAAA chr5@3132    | 3.42E-10 | 0.00705  |
| 22Feb2011 | 4233  | 526.78  | -3.83085 | 2 K.KLDLNM chr2@7182     | 2.19E-11 | 0.001502 |
| 22Feb2011 | 2425  | 403.72  | -6.21393 | 2 _..VSASSSIR chr5@1478  | 2.79E-10 | 0.006342 |
| 22Feb2011 | 19771 | 798.15  | -11.5616 | 4 K.SGDAGIV Splice@chr   | 9.42E-12 | 7.98E-04 |
| 22Feb2011 | 6910  | 493.78  | -11.3951 | 2 R.KNQENLI Splice@chr   | 3.10E-10 | 0.00656  |
| 22Feb2011 | 21710 | 634.84  | 6.410455 | 2 R.VDIGDILF Splice@chr  | 4.94E-13 | 1.35E-04 |
| 22Feb2011 | 19993 | 860.76  | -27.8142 | 3 _..NLSARVC Splice@chr  | 3.99E-10 | 0.008085 |
| 22Feb2011 | 21077 | 1007.86 | 15.19559 | 3 R.CWNRRA Splice@chr    | 2.89E-10 | 0.006414 |
| 22Feb2011 | 10977 | 747.57  | 5.690177 | 5 S.HLPRPGH Splice@chr   | 1.93E-10 | 0.004699 |
| 22Feb2011 | 3856  | 403.2   | 4.561063 | 2 K.DDIAASG chr3@1101    | 3.43E-10 | 0.00705  |
| 22Feb2011 | 18015 | 818.16  | 2.484952 | 4 S.DFFPTEQ Splice@chr   | 5.10E-13 | 1.35E-04 |
| 22Feb2011 | 21147 | 1076.55 | -19.2805 | 3 S.HGVKLG C Splice@chr  | 5.34E-10 | 0.009757 |

|           |       |         |          |                          |          |          |
|-----------|-------|---------|----------|--------------------------|----------|----------|
| 22Feb2011 | 20681 | 1007.86 | 15.19559 | 3 R.CWNRRA Splice@chr    | 7.88E-12 | 6.90E-04 |
| 22Feb2011 | 24802 | 713.69  | 7.56961  | 3 I.YSNTTNSI chr1@2335   | 3.38E-10 | 0.00705  |
| 22Feb2011 | 1014  | 412.23  | 25.3069  | 2 R.IASYQGG chrX@1679    | 4.97E-11 | 0.002096 |
| 22Feb2011 | 4381  | 756.42  | -22.2995 | 1 R.PLSAAAA chr5@3132    | 3.37E-10 | 0.006973 |
| 22Feb2011 | 23870 | 795.65  | -15.5001 | 4 K.SGTIFDNI Splice@chr  | 4.79E-12 | 6.90E-04 |
| 22Feb2011 | 15813 | 490.74  | -7.60235 | 2 K.DITMEIM chr3@1481    | 4.80E-10 | 0.009079 |
| 22Feb2011 | 19835 | 828.87  | -1.01339 | 4 S.EDLGSDA Splice@chr   | 9.91E-13 | 1.35E-04 |
| 22Feb2011 | 230   | 584.79  | -27.5703 | 2 R.FSLKNTI chr4@2692    | 4.00E-10 | 0.008085 |
| 22Feb2011 | 10861 | 747.57  | 5.690177 | 5 S.HLPRPGH Splice@chr   | 3.10E-10 | 0.00656  |
| 22Feb2011 | 20939 | 1003.18 | 7.145987 | 3 R.CWNRRA Splice@chr    | 2.73E-13 | 1.35E-04 |
| 22Feb2011 | 1043  | 574.77  | -16.2754 | 2 K.IMADSIT chr4@4334    | 2.50E-10 | 0.005696 |
| 22Feb2011 | 21661 | 634.83  | -9.39461 | 2 R.VDIGDILF Splice@chr  | 5.06E-13 | 1.35E-04 |
| 22Feb2011 | 6805  | 533.82  | 16.26677 | 2 K.TNIYTILT chr5@1329   | 4.93E-10 | 0.009149 |
| 22Feb2011 | 3390  | 417.22  | 24.63685 | 2 K.SVENSAA chr2@1335    | 5.22E-10 | 0.009351 |
| 22Feb2011 | 13288 | 1115.1  | 6.276672 | 2 S.LYSSCPC chrX@1175    | 2.50E-10 | 0.005696 |
| 22Feb2011 | 20543 | 694.87  | 2.550973 | 2 K.YHNITLQ chrX@3836    | 5.33E-10 | 0.009757 |
| 22Feb2011 | 9328  | 626.68  | 23.52414 | 3 R.VVDALGI Splice@chr   | 2.91E-12 | 3.82E-04 |
| 22Feb2011 | 4647  | 741.38  | -23.1647 | 2 K.FPENRHI chr2@1477    | 4.37E-10 | 0.008629 |
| 22Feb2011 | 24952 | 828.39  | -8.00743 | 2 K.PNLK+14 chr2@3862    | 2.16E-10 | 0.004945 |
| 22Feb2011 | 2568  | 412.56  | -22.1132 | 3 _ .NPRGKKC Splice@chr  | 3.20E-10 | 0.007877 |
| 22Feb2011 | 21440 | 1060.53 | -16.1915 | 3 K.SGTIFDNI Splice@chr  | 4.69E-12 | 0        |
| 22Feb2011 | 19889 | 897.46  | 8.122101 | 4 R.FWFFGKI chr2@7020    | 3.38E-10 | 0.008276 |
| 22Feb2011 | 23685 | 860.68  | 2.433027 | 4 R.FQSAAIG Splice@chr   | 1.86E-12 | 0        |
| 22Feb2011 | 14782 | 1056.22 | 29.33653 | 3 R.TTGVLVD Splice@chr   | 7.69E-11 | 0.002353 |
| 22Feb2011 | 13785 | 858.47  | -5.67211 | 3 _ .LETGIKPI Splice@chr | 2.95E-13 | 0        |
| 22Feb2011 | 15470 | 888.97  | 20.94366 | 2 K.DITLEVEA Splice@chr  | 5.74E-11 | 0.00192  |
| 22Feb2011 | 3759  | 741.38  | -23.1647 | 2 K.FPENRHI chr2@1477    | 3.28E-10 | 0.007953 |
| 22Feb2011 | 18540 | 987.51  | 4.289691 | 3 K.KYLFLDNI chr4@1288   | 2.02E-10 | 0.005073 |
| 22Feb2011 | 15070 | 1056.56 | 28.0642  | 3 I.SRVEDDSI Splice@chr  | 3.44E-14 | 0        |
| 22Feb2011 | 15275 | 792.42  | 5.26594  | 4 R.TTGVLVD chr2@1512    | 8.88E-12 | 2.21E-04 |
| 22Feb2011 | 23651 | 1147.25 | 13.44098 | 3 R.FQSAAIG Splice@chr   | 1.11E-14 | 0        |
| 22Feb2011 | 11266 | 705.83  | -3.72364 | 2 M.PSMEEV chr5@4890     | 1.47E-15 | 0        |
| 22Feb2011 | 19700 | 1003.18 | 7.145987 | 3 R.CWNRRA Splice@chr    | 5.51E-11 | 0.001827 |
| 22Feb2011 | 19705 | 1007.85 | 5.172966 | 3 R.CWNRRA Splice@chr    | 3.44E-11 | 0.001296 |
| 22Feb2011 | 21417 | 795.65  | -15.5001 | 4 K.SGTIFDNI Splice@chr  | 7.17E-13 | 0        |
| 22Feb2011 | 23285 | 1172.1  | -3.10143 | 2 K.K+14.016 chr5@1557   | 3.08E-10 | 0.00773  |
| 22Feb2011 | 3866  | 741.38  | -23.1647 | 2 K.FPENRHI chr2@1477    | 1.68E-10 | 0.004531 |
| 22Feb2011 | 21891 | 795.65  | -23.4135 | 4 K.SGTIFDNI Splice@chr  | 5.18E-14 | 0        |
| 22Feb2011 | 24111 | 598.64  | 12.32363 | 3 T.FQGVLDNI Splice@chr  | 2.21E-10 | 0.005223 |
| 22Feb2011 | 20671 | 634.84  | 6.410455 | 2 R.VDIGDILF Splice@chr  | 2.08E-11 | 7.24E-04 |
| 22Feb2011 | 8264  | 431.74  | 5.455516 | 2 _ .PIQDVYK Splice@chr  | 3.04E-10 | 0.007655 |
| 22Feb2011 | 19502 | 1007.85 | 5.172966 | 3 R.CWNRRA Splice@chr    | 3.40E-10 | 0.008349 |
| 22Feb2011 | 17157 | 1060.15 | -15.5056 | 3 I.SRSAAMF Splice@chr   | 1.26E-15 | 0        |
| 22Feb2011 | 1302  | 735.33  | -27.5112 | 2 K.YGHANVI chr1@1065    | 1.75E-10 | 0.004607 |
| 22Feb2011 | 19197 | 1007.86 | 15.19559 | 3 R.CWNRRA Splice@chr    | 1.97E-10 | 0.005073 |
| 22Feb2011 | 21934 | 795.65  | -15.5001 | 4 K.SGTIFDNI Splice@chr  | 2.41E-13 | 0        |
| 22Feb2011 | 21463 | 795.65  | -15.5001 | 4 K.SGTIFDNI Splice@chr  | 2.10E-14 | 0        |

|           |       |         |          |                         |          |          |
|-----------|-------|---------|----------|-------------------------|----------|----------|
| 22Feb2011 | 21514 | 795.65  | -15.5001 | 4 K.SGTIFDNI Splice@chr | 7.63E-14 | 0        |
| 22Feb2011 | 13333 | 887.93  | 29.43791 | 2 I.DEREESTM Splice@chr | 8.23E-11 | 0.002523 |
| 22Feb2011 | 24438 | 770.43  | -18.4033 | 3 K.YLDAKCK chr4@3751   | 3.08E-10 | 0.00773  |
| 22Feb2011 | 19756 | 897.45  | -3.04709 | 4 R.FWFFGKI chr2@7020   | 6.22E-12 | 0        |
| 22Feb2011 | 19749 | 1003.18 | 7.145987 | 3 R.CWNRRA Splice@chr   | 3.28E-12 | 0        |
| 22Feb2011 | 1272  | 735.33  | -27.5112 | 2 K.YGHANVI chr1@1065   | 1.78E-10 | 0.00467  |
| 22Feb2011 | 13183 | 484.27  | -10.2722 | 3 K.ISSAIAMf chr4@7544  | 1.28E-11 | 5.39E-04 |
| 22Feb2011 | 23779 | 1147.24 | 4.705638 | 3 R.FQSAAIG Splice@chr  | 3.97E-15 | 0        |
| 22Feb2011 | 14081 | 938.46  | 22.50833 | 2 R.ECSQSDS chr2@8876   | 1.96E-10 | 0.005073 |
| 22Feb2011 | 19651 | 1003.18 | 7.145987 | 3 R.CWNRRA Splice@chr   | 7.81E-11 | 0.002353 |
| 22Feb2011 | 18600 | 1063.86 | -15.3899 | 3 K.SGDAGIV Splice@chr  | 9.88E-11 | 0.003141 |
| 22Feb2011 | 15013 | 1056.56 | 28.0642  | 3 I.SRVEDDS Splice@chr  | 1.87E-14 | 0        |
| 22Feb2011 | 20613 | 634.83  | -9.39461 | 2 R.VDIGDILF Splice@chr | 5.39E-12 | 0        |
| 22Feb2011 | 21248 | 795.65  | -23.4135 | 4 K.SGTIFDNI Splice@chr | 5.10E-13 | 0        |
| 22Feb2011 | 24748 | 1147.24 | 4.705638 | 3 R.FQSAAIG Splice@chr  | 6.43E-12 | 0        |
| 22Feb2011 | 14789 | 490.74  | -7.60235 | 2 K.DITMEIM chr3@1481   | 1.61E-10 | 0.004363 |
| 22Feb2011 | 4073  | 936.48  | 27.86052 | 1 K.LNGGYEC chr2@1191   | 8.95E-11 | 0.0027   |
| 22Feb2011 | 23734 | 1147.24 | 4.705638 | 3 R.FQSAAIG Splice@chr  | 5.64E-16 | 0        |
| 22Feb2011 | 13845 | 858.47  | -5.67211 | 3 _LETGIKPI Splice@chr  | 3.92E-14 | 0        |
| 22Feb2011 | 24580 | 828.38  | -20.1128 | 2 K.PNLK+14 chr2@3862   | 2.13E-11 | 7.24E-04 |
| 22Feb2011 | 16139 | 835.45  | -7.2977  | 4 R.K+14.016 chrX@9996  | 2.48E-10 | 0.005688 |
| 22Feb2011 | 19346 | 873.47  | 13.68595 | 2 R.SIFVDLEP Splice@chr | 1.76E-11 | 6.33E-04 |
| 22Feb2011 | 20661 | 805.47  | -13.7324 | 2 K.TPIFIPAP chr5@1861  | 1.21E-12 | 0        |
| 22Feb2011 | 7319  | 622.65  | 20.40203 | 3 K.QIEQGEA Splice@chr  | 2.15E-10 | 0.005223 |
| 22Feb2011 | 21643 | 795.65  | -23.4135 | 4 K.SGTIFDNI Splice@chr | 1.76E-11 | 6.33E-04 |
| 22Feb2011 | 2912  | 487.3   | 24.66358 | 2 K.LQTSNGL Splice@chr  | 1.75E-10 | 0.004607 |
| 22Feb2011 | 13128 | 484.27  | -10.2722 | 3 K.ISSAIAMf chr4@7544  | 5.78E-12 | 0        |
| 22Feb2011 | 4560  | 626.8   | -12.4435 | 2 R.LCESGAA Splice@chr  | 1.55E-16 | 0        |
| 22Feb2011 | 21725 | 795.65  | -15.5001 | 4 K.SGTIFDNI Splice@chr | 6.51E-11 | 0.002096 |
| 22Feb2011 | 3809  | 741.38  | -23.1647 | 2 K.FPENRHL chr2@1477   | 2.34E-10 | 0.005623 |
| 22Feb2011 | 19103 | 873.47  | 13.68595 | 2 R.SIFVDLEP Splice@chr | 8.06E-11 | 0.002523 |
| 22Feb2011 | 19102 | 1003.18 | 7.145987 | 3 R.CWNRRA Splice@chr   | 5.80E-12 | 0        |
| 22Feb2011 | 13389 | 887.93  | 29.43791 | 2 I.DEREESTM Splice@chr | 5.86E-11 | 0.002014 |
| 22Feb2011 | 6482  | 719.35  | -29.5675 | 2 L.RFPMTVE chr1@9136   | 1.71E-10 | 0.004531 |
| 22Feb2011 | 5865  | 434.24  | 13.9946  | 3 _RSNDQTI chr5@6378    | 1.82E-10 | 0.00467  |
| 22Feb2011 | 7257  | 622.65  | 20.40203 | 3 K.QIEQGEA Splice@chr  | 3.73E-12 | 0        |
| 22Feb2011 | 8136  | 975.55  | -13.0268 | 1 K.LPKLDAYI chr4@1149  | 1.16E-10 | 0.00356  |
| 22Feb2011 | 19885 | 1007.85 | 5.172966 | 3 R.CWNRRA Splice@chr   | 1.08E-10 | 0.003297 |
| 22Feb2011 | 8221  | 862.47  | 2.904885 | 1 _PIQDVYK Splice@chr   | 1.80E-10 | 0.00467  |
| 22Feb2011 | 8054  | 724.34  | 5.400383 | 3 V.CLTEEGK Splice@chr  | 1.94E-10 | 0.005008 |
| 22Feb2011 | 14732 | 490.74  | -7.60235 | 2 K.DITMEIM chr3@1481   | 3.61E-10 | 0.008753 |
| 22Feb2011 | 6003  | 533.82  | 16.26677 | 2 K.TNIYTILTI chr5@1329 | 2.40E-10 | 0.005623 |
| 22Feb2011 | 1953  | 735.33  | -27.5112 | 2 K.YGHANVI chr1@1065   | 1.31E-10 | 0.003878 |
| 22Feb2011 | 20570 | 634.83  | -9.39461 | 2 R.VDIGDILF Splice@chr | 3.85E-12 | 0        |
| 22Feb2011 | 19049 | 873.47  | 13.68595 | 2 R.SIFVDLEP Splice@chr | 2.18E-12 | 0        |
| 22Feb2011 | 19051 | 761.88  | -3.44933 | 4 K.SGDAGIV Splice@chr  | 7.91E-11 | 0.002444 |
| 22Feb2011 | 4619  | 626.8   | -12.4435 | 2 R.LCESGAA Splice@chr  | 4.81E-15 | 0        |

|           |       |         |          |                         |          |          |
|-----------|-------|---------|----------|-------------------------|----------|----------|
| 22Feb2011 | 18939 | 761.88  | -3.44933 | 4 K.SGDAGIV Splice@chr  | 3.82E-12 | 0        |
| 22Feb2011 | 21504 | 1060.54 | -6.74128 | 3 K.SGTIFDNI Splice@chr | 5.69E-13 | 0        |
| 22Feb2011 | 11281 | 851.48  | -15.2578 | 2 K.RGVRLSH chr2@2785   | 5.49E-11 | 0.001827 |
| 22Feb2011 | 13777 | 644.11  | 2.967857 | 4 _LETGIKPI Splice@chr  | 1.10E-10 | 0.003297 |
| 22Feb2011 | 21199 | 795.65  | -23.4135 | 4 K.SGTIFDNI Splice@chr | 2.03E-12 | 0        |
| 22Feb2011 | 26727 | 953.51  | 20.20712 | 4 _CSSFFFKL chr4@1457   | 3.54E-10 | 0.008427 |
| 22Feb2011 | 8202  | 431.74  | 5.455516 | 2 _PIQDVYK Splice@chr   | 2.77E-10 | 0.006943 |
| 22Feb2011 | 24135 | 1147.24 | 4.705638 | 3 R.FQSAAIG Splice@chr  | 2.64E-15 | 0        |
| 22Feb2011 | 18596 | 798.15  | -11.5616 | 4 K.SGDAGIV Splice@chr  | 8.79E-11 | 0.002611 |
| 22Feb2011 | 7160  | 533.82  | 16.26677 | 2 K.TNIYTILTI chr5@1329 | 1.73E-10 | 0.003646 |
| 22Feb2011 | 24201 | 795.65  | -15.5001 | 4 K.SGTIFDNI Splice@chr | 1.65E-14 | 0        |
| 22Feb2011 | 14533 | 887.93  | 29.43791 | 2 I.DEREESTN Splice@chr | 1.67E-10 | 0.003563 |
| 22Feb2011 | 22886 | 795.65  | -23.4135 | 4 K.SGTIFDNI Splice@chr | 2.15E-15 | 0        |
| 22Feb2011 | 20050 | 729.69  | 0.922777 | 3 R.SCSFFFNI chrX@8486  | 2.80E-10 | 0.006189 |
| 22Feb2011 | 25481 | 1147.24 | 4.705638 | 3 R.FQSAAIG Splice@chr  | 6.09E-14 | 0        |
| 22Feb2011 | 1780  | 450.77  | 18.59199 | 2 K.IEVDGVLI chrX@1251  | 2.10E-10 | 0.00444  |
| 22Feb2011 | 8056  | 1025.61 | -11.6755 | 1 K.LGLGSL chr5@4945    | 7.39E-12 | 1.11E-04 |
| 22Feb2011 | 27899 | 411.7   | -22.8862 | 2 K.IYGGGGC chr4@1715   | 2.93E-10 | 0.006339 |
| 22Feb2011 | 20150 | 644.4   | -15.5206 | 2 K.KIISDFLP chr5@1401  | 2.56E-10 | 0.005561 |
| 22Feb2011 | 24632 | 984.81  | -24.8852 | 3 K.SGTIFDNI Splice@chr | 3.28E-11 | 6.90E-04 |
| 22Feb2011 | 19846 | 798.15  | -11.5616 | 4 K.SGDAGIV Splice@chr  | 1.70E-11 | 5.20E-04 |
| 22Feb2011 | 21121 | 649.9   | -9.68814 | 2 K.LKIITNLEI chr2@6716 | 1.10E-10 | 0.002675 |
| 22Feb2011 | 16024 | 490.74  | -7.60235 | 2 K.DITMEIM chr3@1481   | 4.88E-10 | 0.009905 |
| 22Feb2011 | 20506 | 1007.86 | 15.19559 | 3 R.CWNRRRA Splice@chr  | 1.83E-10 | 0.003883 |
| 22Feb2011 | 21413 | 934.48  | 16.93502 | 2 R.QFRQSGI chr5@4795   | 9.63E-11 | 0.002364 |
| 22Feb2011 | 12561 | 705.83  | -3.72364 | 2 M.PSMEEV chr5@4890    | 8.22E-15 | 0        |
| 22Feb2011 | 15083 | 858.47  | -5.67211 | 3 _LETGIKPI Splice@chr  | 6.22E-11 | 0.001494 |
| 22Feb2011 | 2632  | 521.95  | -14.3718 | 3 K.LNVDVQI chr2@3217   | 2.62E-10 | 0.005634 |
| 22Feb2011 | 2189  | 450.77  | 18.59199 | 2 K.IEVDGVLI chrX@1251  | 1.38E-10 | 0.002996 |
| 22Feb2011 | 25471 | 598.64  | 12.32363 | 3 T.FQGVLDM Splice@chr  | 1.59E-10 | 0.003485 |
| 22Feb2011 | 21836 | 634.84  | 6.410455 | 2 R.VDIGDILF Splice@chr | 6.87E-13 | 0        |
| 22Feb2011 | 19798 | 987.52  | 14.43646 | 3 K.KYLFLDNI chr4@1288  | 1.21E-10 | 0.002675 |
| 22Feb2011 | 23946 | 911.42  | 20.49399 | 2 _PRM+15. Splice@chr   | 4.86E-10 | 0.009905 |
| 22Feb2011 | 6867  | 434.24  | 13.9946  | 3 _RSNDQTI chr5@6378    | 3.36E-11 | 6.90E-04 |
| 22Feb2011 | 796   | 487.28  | -16.4424 | 2 K.LQTSNGL Splice@chr  | 3.54E-10 | 0.007897 |
| 22Feb2011 | 21260 | 1007.85 | 5.172966 | 3 R.CWNRRRA Splice@chr  | 7.95E-12 | 1.11E-04 |
| 22Feb2011 | 21888 | 634.84  | 6.410455 | 2 R.VDIGDILF Splice@chr | 1.69E-13 | 0        |
| 22Feb2011 | 18389 | 1060.15 | -15.5056 | 3 I.SRSAAMF Splice@chr  | 4.65E-18 | 0        |
| 22Feb2011 | 22296 | 975.8   | -15.4281 | 3 K.SGTIFDNI Splice@chr | 1.42E-10 | 0.002996 |
| 22Feb2011 | 21106 | 1003.18 | 7.145987 | 3 R.CWNRRRA Splice@chr  | 2.08E-11 | 6.90E-04 |
| 22Feb2011 | 1731  | 450.77  | 18.59199 | 2 K.IEVDGVLI chrX@1251  | 2.75E-10 | 0.006113 |
| 22Feb2011 | 16779 | 888.97  | 20.94366 | 2 K.DITLEVEA Splice@chr | 1.38E-10 | 0.002996 |
| 22Feb2011 | 21433 | 1007.86 | 15.19559 | 3 R.CWNRRRA Splice@chr  | 1.76E-10 | 0.003883 |
| 22Feb2011 | 22969 | 763.14  | 20.21827 | 3 K.TK+14.01 chrX@1037  | 4.37E-10 | 0.009171 |
| 22Feb2011 | 13209 | 554.26  | 6.682444 | 2 R.M+15.99 Splice@chr  | 3.46E-10 | 0.007742 |
| 22Feb2011 | 3921  | 416.22  | 25.13721 | 2 R.NADWGI chr5@1688    | 3.70E-10 | 0.008202 |
| 22Feb2011 | 21155 | 1003.18 | 7.145987 | 3 R.CWNRRRA Splice@chr  | 2.95E-14 | 0        |

|           |       |         |          |                         |          |          |
|-----------|-------|---------|----------|-------------------------|----------|----------|
| 22Feb2011 | 24727 | 1172.1  | -3.10143 | 2 K.K+14.016 chr5@1557  | 3.55E-10 | 0.007897 |
| 22Feb2011 | 22634 | 795.65  | -15.5001 | 4 K.SGTIFDNI Splice@chr | 3.75E-16 | 0        |
| 22Feb2011 | 15022 | 858.47  | -5.67211 | 3 _LETGIKPI Splice@chr  | 5.93E-12 | 1.11E-04 |
| 22Feb2011 | 25523 | 1147.24 | 4.705638 | 3 R.FQSAAIG Splice@chr  | 5.21E-15 | 0        |
| 22Feb2011 | 24847 | 968.17  | -29.3651 | 3 R.FFYNIFAL chrX@4722  | 2.57E-10 | 0.005561 |
| 22Feb2011 | 19472 | 744.71  | -3.82989 | 3 R.MTRVFSI chr3@1715   | 1.08E-10 | 0.002675 |
| 22Feb2011 | 8251  | 622.65  | 20.40203 | 3 K.QIEQGEA Splice@chr  | 6.24E-11 | 0.001494 |
| 22Feb2011 | 15839 | 622.33  | 9.587405 | 2 R.AK+14.01 chr2@4270  | 3.25E-10 | 0.00711  |
| 22Feb2011 | 11572 | 747.76  | -8.61645 | 5 S.HLPRPGH Splice@chr  | 4.47E-11 | 0.001054 |
| 22Feb2011 | 14588 | 887.93  | 29.43791 | 2 I.DEREESTA Splice@chr | 8.98E-11 | 0.002104 |
| 22Feb2011 | 4422  | 741.38  | -23.1647 | 2 K.FPENRHI chr2@1477   | 4.73E-10 | 0.009759 |
| 22Feb2011 | 7649  | 460.25  | -17.4268 | 2 K.YPGIGGI Splice@chr  | 1.41E-10 | 0.002996 |
| 22Feb2011 | 22893 | 1060.54 | -6.74128 | 3 K.SGTIFDNI Splice@chr | 2.34E-13 | 0        |
| 22Feb2011 | 14964 | 858.47  | -5.67211 | 3 _LETGIKPI Splice@chr  | 2.04E-14 | 0        |
| 22Feb2011 | 4541  | 741.38  | -23.1647 | 2 K.FPENRHI chr2@1477   | 1.89E-10 | 0.004051 |
| 22Feb2011 | 15895 | 622.33  | 9.587405 | 2 R.AK+14.01 chr2@4270  | 2.24E-10 | 0.004676 |
| 22Feb2011 | 26019 | 828.38  | -20.1128 | 2 K.PNLK+14 chr2@3862   | 1.59E-10 | 0.003485 |
| 22Feb2011 | 27997 | 411.7   | -22.8862 | 2 K.IYGGGGG chr4@1715   | 3.23E-10 | 0.006951 |
| 22Feb2011 | 17690 | 722.45  | -4.95112 | 2 R.RK+14.01 Splice@chr | 2.53E-10 | 0.005561 |
| 22Feb2011 | 20147 | 1007.86 | 15.19559 | 3 R.CWNRRA Splice@chr   | 3.73E-10 | 0.008344 |
| 22Feb2011 | 25666 | 713.68  | -6.48229 | 3 I.YSNTTNSI chr1@2335  | 5.30E-11 | 0.00132  |
| 22Feb2011 | 20261 | 761.88  | -3.44933 | 4 K.SGDAGIV Splice@chr  | 4.86E-10 | 0.009905 |
| 22Feb2011 | 7923  | 1089.65 | -29.1532 | 1 K.KLKSMKI chr5@3701   | 1.30E-10 | 0.002753 |
| 22Feb2011 | 22939 | 795.65  | -23.4135 | 4 K.SGTIFDNI Splice@chr | 3.22E-15 | 0        |
| 22Feb2011 | 9175  | 431.74  | 5.455516 | 2 _PIQDVYK Splice@chr   | 3.65E-10 | 0.008129 |
| 22Feb2011 | 9231  | 431.74  | 5.455516 | 2 _PIQDVYK Splice@chr   | 2.19E-10 | 0.004512 |
| 22Feb2011 | 21219 | 1007.86 | 15.19559 | 3 R.CWNRRA Splice@chr   | 1.37E-10 | 0.002996 |
| 22Feb2011 | 24183 | 1060.54 | -6.74128 | 3 K.SGTIFDNI Splice@chr | 1.05E-11 | 3.18E-04 |
| 22Feb2011 | 5565  | 626.8   | -12.4435 | 2 R.LCESGAA Splice@chr  | 2.08E-16 | 0        |
| 22Feb2011 | 1955  | 450.77  | 18.59199 | 2 K.IEVDGVLI chrX@1251  | 1.69E-10 | 0.003563 |
| 22Feb2011 | 13711 | 894.41  | 13.57006 | 2 _FSDDDVT Splice@chr   | 4.80E-10 | 0.009832 |
| 22Feb2011 | 9373  | 560.6   | -22.2499 | 3 _EMFSAAI chr4@3415    | 1.88E-10 | 0.004051 |
| 22Feb2011 | 4481  | 741.38  | -23.1647 | 2 K.FPENRHI chr2@1477   | 1.53E-10 | 0.003333 |
| 22Feb2011 | 14365 | 484.27  | -10.2722 | 3 K.ISSAIAMF chr4@7544  | 3.15E-11 | 6.90E-04 |
| 22Feb2011 | 6900  | 574.81  | -4.78661 | 2 K.NGPNNQ chrX@1712    | 4.17E-10 | 0.008713 |
| 22Feb2011 | 27840 | 411.7   | -22.8862 | 2 K.IYGGGGG chr4@1715   | 2.52E-10 | 0.005561 |
| 22Feb2011 | 21974 | 805.46  | -26.0992 | 2 K.TPIFIPAP chr5@1861  | 6.15E-12 | 1.11E-04 |
| 22Feb2011 | 24271 | 917.5   | -4.96296 | 2 _SIMSRLEI Splice@chr  | 4.37E-10 | 0.009171 |
| 22Feb2011 | 27543 | 439.74  | 18.7116  | 2 R.SIAMFGP chr2@4157   | 2.56E-10 | 0.005314 |
| 22Feb2011 | 25179 | 1147.24 | 4.705638 | 3 R.FQSAAIG Splice@chr  | 2.15E-15 | 0        |
| 22Feb2011 | 6862  | 434.24  | 13.9946  | 3 _RSNDQTI chr5@6378    | 1.79E-10 | 0.003721 |
| 22Feb2011 | 10957 | 897.42  | -27.6753 | 3 _QVREMH Splice@chr    | 4.86E-10 | 0.009225 |
| 22Feb2011 | 18471 | 1059.81 | -20.7519 | 3 I.SRSAAMF Splice@chr  | 1.99E-17 | 0        |
| 22Feb2011 | 106   | 523.27  | -14.3277 | 2 _QADVDV Splice@chr    | 3.92E-11 | 0.001204 |
| 22Feb2011 | 27117 | 760.4   | -4.0463  | 3 _TQTNTKI chrX@7978    | 5.15E-10 | 0.009721 |
| 22Feb2011 | 20459 | 873.47  | 13.68595 | 2 R.SIFVDLEP Splice@chr | 3.38E-11 | 0.001033 |
| 22Feb2011 | 1474  | 587.3   | 4.892896 | 2 Q.NAVEQE Splice@chr   | 1.50E-11 | 2.95E-04 |

|           |       |         |          |                         |          |          |
|-----------|-------|---------|----------|-------------------------|----------|----------|
| 22Feb2011 | 21142 | 1003.18 | 7.145987 | 3 R.CWNRRA Splice@chr   | 4.78E-12 | 1.05E-04 |
| 22Feb2011 | 838   | 439.74  | 18.7116  | 2 R.SIAMFGP chr2@4157   | 1.22E-10 | 0.00315  |
| 22Feb2011 | 23002 | 795.65  | -15.5001 | 4 K.SGTIFDNI Splice@chr | 9.54E-16 | 0        |
| 22Feb2011 | 21092 | 1003.18 | 7.145987 | 3 R.CWNRRA Splice@chr   | 3.94E-11 | 0.001204 |
| 22Feb2011 | 11017 | 747.56  | -7.71771 | 5 S.HLPRPGH Splice@chr  | 1.36E-10 | 0.003211 |
| 22Feb2011 | 2689  | 447.74  | -24.0456 | 2 K.IIYDGSVK chrX@2516  | 1.28E-10 | 0.003211 |
| 22Feb2011 | 25911 | 770.76  | -24.193  | 3 K.YLDAKCK chr4@3751   | 4.67E-10 | 0.008933 |
| 22Feb2011 | 24183 | 795.66  | -2.97654 | 4 K.SGTIFDNI Splice@chr | 3.85E-13 | 0        |
| 22Feb2011 | 22097 | 805.47  | -13.7324 | 2 K.TPIFIPAP chr5@1861  | 3.37E-10 | 0.007113 |
| 22Feb2011 | 2763  | 460.72  | 10.9535  | 2 R.MGMDPI Splice@chr   | 3.23E-10 | 0.006884 |
| 22Feb2011 | 1430  | 587.3   | 4.892896 | 2 Q.NAVEQE Splice@chr   | 8.83E-12 | 1.05E-04 |
| 22Feb2011 | 21195 | 1003.51 | 2.70076  | 3 R.CWNRRA Splice@chr   | 2.83E-14 | 0        |
| 22Feb2011 | 14816 | 858.48  | 6.006088 | 3 _LETGIKPI Splice@chr  | 1.45E-14 | 0        |
| 22Feb2011 | 19947 | 1063.86 | -15.3899 | 3 K.SGDAGIV Splice@chr  | 2.65E-10 | 0.005457 |
| 22Feb2011 | 22947 | 795.65  | -23.4135 | 4 K.SGTIFDNI Splice@chr | 7.75E-13 | 0        |
| 22Feb2011 | 27522 | 439.74  | 18.7116  | 2 R.SIAMFGP chr2@4157   | 9.56E-11 | 0.002168 |
| 22Feb2011 | 8002  | 1089.65 | -29.1532 | 1 K.KLKSMKN chr5@3701   | 1.86E-10 | 0.004199 |
| 22Feb2011 | 2646  | 536.29  | -10.9462 | 2 _QVEFNPI Splice@chr   | 2.73E-10 | 0.00561  |
| 22Feb2011 | 5687  | 626.8   | -12.4435 | 2 R.LCESGAA Splice@chr  | 1.53E-15 | 0        |
| 22Feb2011 | 9145  | 862.47  | 2.904885 | 1 _PIQDVYK Splice@chr   | 1.85E-10 | 0.004199 |
| 22Feb2011 | 21967 | 634.84  | 6.410455 | 2 R.VDIGDILF Splice@chr | 5.10E-13 | 0        |
| 22Feb2011 | 14442 | 887.93  | 29.43791 | 2 I.DEREESTA Splice@chr | 1.04E-10 | 0.002583 |
| 22Feb2011 | 23057 | 795.65  | -15.5001 | 4 K.SGTIFDNI Splice@chr | 1.98E-14 | 0        |
| 22Feb2011 | 7945  | 1089.65 | -29.1532 | 1 K.KLKSMKN chr5@3701   | 1.30E-10 | 0.003211 |
| 22Feb2011 | 14821 | 644.11  | 2.967857 | 4 _LETGIKPI Splice@chr  | 1.25E-10 | 0.003211 |
| 22Feb2011 | 24226 | 968.47  | 23.9199  | 3 _GCSIVPIS Splice@chr  | 5.62E-11 | 0.001535 |
| 22Feb2011 | 13832 | 454.25  | -15.7105 | 3 R.VLIRINGM Splice@chr | 3.58E-10 | 0.007539 |
| 22Feb2011 | 16260 | 759.4   | -15.0495 | 2 K.FIDANLQ chr4@8206   | 3.37E-10 | 0.00719  |
| 22Feb2011 | 14652 | 833.93  | -9.2006  | 2 _IIEPYVAM Splice@chr  | 3.69E-10 | 0.007593 |
| 22Feb2011 | 1514  | 587.3   | 4.892896 | 2 Q.NAVEQE Splice@chr   | 1.50E-11 | 2.95E-04 |
| 22Feb2011 | 22895 | 795.65  | -15.5001 | 4 K.SGTIFDNI Splice@chr | 2.71E-13 | 0        |
| 22Feb2011 | 857   | 439.74  | 18.7116  | 2 R.SIAMFGP chr2@4157   | 3.84E-10 | 0.007593 |
| 22Feb2011 | 20734 | 1003.19 | 17.13413 | 3 R.CWNRRA Splice@chr   | 1.54E-10 | 0.003418 |
| 22Feb2011 | 9132  | 431.74  | 5.455516 | 2 _PIQDVYK Splice@chr   | 2.34E-10 | 0.004862 |
| 22Feb2011 | 1597  | 587.8   | 2.031861 | 2 Q.NAVEQE Splice@chr   | 3.10E-11 | 6.62E-04 |
| 22Feb2011 | 25093 | 1147.24 | 4.705638 | 3 R.FQSAAIG Splice@chr  | 5.64E-16 | 0        |
| 22Feb2011 | 26017 | 828.38  | -20.1128 | 2 K.PNLK+14 chr2@3862   | 2.53E-10 | 0.00524  |
| 22Feb2011 | 15662 | 622.33  | 9.587405 | 2 R.AK+14.01 chr2@4270  | 5.18E-10 | 0.009866 |
| 22Feb2011 | 22030 | 634.84  | 6.410455 | 2 R.VDIGDILF Splice@chr | 3.07E-12 | 0        |
| 22Feb2011 | 22036 | 805.46  | -26.0992 | 2 K.TPIFIPAP chr5@1861  | 1.01E-10 | 0.002502 |
| 22Feb2011 | 4953  | 741.38  | -23.1647 | 2 K.FPENRHI chr2@1477   | 4.65E-10 | 0.008933 |
| 22Feb2011 | 27795 | 439.74  | 18.7116  | 2 R.SIAMFGP chr2@4157   | 3.98E-10 | 0.007884 |
| 22Feb2011 | 27421 | 795.47  | -12.9834 | 1 K.LMLPPPK Splice@chr  | 3.53E-10 | 0.007405 |
| 22Feb2011 | 27426 | 439.74  | 18.7116  | 2 R.SIAMFGP chr2@4157   | 1.34E-10 | 0.003211 |
| 22Feb2011 | 21480 | 957.5   | 22.57714 | 3 K.LFQVLQN Splice@chr  | 2.60E-10 | 0.005457 |
| 22Feb2011 | 15163 | 516.3   | 4.106203 | 3 R.NIIFLMVI chrX@1294  | 2.63E-10 | 0.005457 |
| 22Feb2011 | 19894 | 1063.86 | -15.3899 | 3 K.SGDAGIV Splice@chr  | 4.81E-10 | 0.009225 |

|           |       |         |          |                          |          |          |
|-----------|-------|---------|----------|--------------------------|----------|----------|
| 22Feb2011 | 21077 | 897.45  | -3.04709 | 4 R.FWFFGKI chr2@7020    | 4.77E-10 | 0.009083 |
| 22Feb2011 | 8145  | 674.99  | -20.5867 | 3 _..TIWELSG chr5@1397   | 4.21E-10 | 0.008232 |
| 22Feb2011 | 14872 | 858.47  | -5.67211 | 3 _..LETGIKPI Splice@chr | 4.31E-14 | 0        |
| 22Feb2011 | 9248  | 560.6   | -22.2499 | 3 _..EMFSAA\ chr4@3419   | 1.82E-10 | 0.003883 |
| 22Feb2011 | 8267  | 622.65  | 20.40203 | 3 K.QIEQGEA Splice@chr   | 1.30E-10 | 0.003211 |
| 22Feb2011 | 25139 | 1062.61 | 3.365979 | 2 E.EYFFRNL\ chrX@1001   | 1.91E-10 | 0.004199 |
| 22Feb2011 | 14708 | 833.93  | -9.2006  | 2 _..IIEPYVAV Splice@chr | 2.34E-11 | 5.73E-04 |
| 22Feb2011 | 802   | 439.74  | 18.7116  | 2 R.SIAMFGP chr2@4157    | 4.81E-11 | 0.00136  |
| 22Feb2011 | 12288 | 851.49  | -3.4814  | 2 K.RGVRLSH chr2@2785    | 2.40E-10 | 0.004933 |
| 22Feb2011 | 27391 | 439.74  | 18.7116  | 2 R.SIAMFGP chr2@4157    | 3.81E-11 | 0.001116 |
| 22Feb2011 | 25700 | 713.68  | -6.48229 | 3 I.YSNTTNSI chr1@2335   | 4.55E-11 | 0.00136  |
| 22Feb2011 | 25132 | 1147.24 | 4.705638 | 3 R.FQSAAIG Splice@chr   | 3.41E-15 | 0        |
| 22Feb2011 | 1670  | 587.3   | 4.892896 | 2 Q.NAVEQE\ Splice@chr   | 2.30E-11 | 5.73E-04 |
| 22Feb2011 | 15898 | 490.74  | -7.60235 | 2 K.DITMEIM chr3@1481    | 1.82E-10 | 0.003883 |
| 22Feb2011 | 1379  | 587.3   | 4.892896 | 2 Q.NAVEQE\ Splice@chr   | 1.41E-11 | 2.95E-04 |
| 22Feb2011 | 1385  | 439.74  | 18.7116  | 2 R.SIAMFGP chr2@4157    | 3.52E-10 | 0.007405 |
| 22Feb2011 | 8990  | 724.34  | 5.400383 | 3 V.CLTEEGK Splice@chr   | 5.91E-12 | 1.05E-04 |
| 22Feb2011 | 24062 | 911.42  | 20.49399 | 2 _..PRM+15. Splice@chr  | 4.70E-10 | 0.008933 |
| 22Feb2011 | 26061 | 828.38  | -20.1128 | 2 K.PNLK+14 chr2@3862    | 2.29E-10 | 0.004862 |
| 22Feb2011 | 27447 | 439.74  | 18.7116  | 2 R.SIAMFGP chr2@4157    | 1.01E-10 | 0.002502 |
| 22Feb2011 | 24231 | 795.65  | -15.5001 | 4 K.SGTIFDNI Splice@chr  | 5.27E-15 | 0        |
| 22Feb2011 | 23166 | 795.65  | -15.5001 | 4 K.SGTIFDNI Splice@chr  | 1.32E-11 | 2.95E-04 |
| 22Feb2011 | 15270 | 938.46  | 22.50833 | 2 R.ECSQSDS chr2@8876    | 9.75E-11 | 0.002252 |
| 22Feb2011 | 16209 | 759.4   | -15.0495 | 2 K.FIDANLQ chr4@8206    | 2.91E-10 | 0.006068 |
| 22Feb2011 | 13013 | 516.29  | 9.357636 | 2 K.VSVDVLE chrX@1218    | 5.30E-11 | 0.00136  |
| 22Feb2011 | 821   | 439.74  | 18.7116  | 2 R.SIAMFGP chr2@4157    | 2.83E-10 | 0.005915 |
| 22Feb2011 | 14245 | 484.61  | 1.222351 | 3 K.ISSAIAMf chr4@7544   | 2.02E-11 | 3.90E-04 |
| 22Feb2011 | 7002  | 574.81  | -4.78661 | 2 K.NGPNNQ chrX@1712     | 2.80E-10 | 0.005839 |
| 22Feb2011 | 15842 | 490.74  | -7.60235 | 2 K.DITMEIM chr3@1481    | 1.85E-10 | 0.004127 |
| 22Feb2011 | 21919 | 634.84  | 6.410455 | 2 R.VDIGDILF Splice@chr  | 3.67E-13 | 0        |
| 22Feb2011 | 3689  | 412.56  | -22.1132 | 3 _..NPRGKKC Splice@chr  | 4.03E-11 | 0.001204 |
| 22Feb2011 | 23116 | 968.13  | 18.26018 | 3 _..GCSIVPIS Splice@chr | 3.57E-11 | 0.001116 |
| 22Feb2011 | 21231 | 897.46  | 8.122101 | 4 R.FWFFGKI chr2@7020    | 1.25E-10 | 0.003211 |
| 22Feb2011 | 20403 | 762.13  | -4.55161 | 4 K.SGDAGIV Splice@chr   | 2.41E-12 | 0        |
| 22Feb2011 | 21100 | 1007.85 | 5.172966 | 3 R.CWNRRA Splice@chr    | 1.42E-11 | 2.95E-04 |
| 22Feb2011 | 25155 | 688.75  | 8.895763 | 5 R.FQSAAIG Splice@chr   | 2.53E-11 | 5.73E-04 |
| 22Feb2011 | 24444 | 929.15  | -28.8338 | 3 R.KSTAKLK\ chr2@8593   | 1.33E-10 | 0.003211 |
| 22Feb2011 | 5692  | 524.61  | -19.8663 | 3 R.APFSHPL chrX@6163    | 4.32E-10 | 0.008522 |
| 22Feb2011 | 1553  | 587.3   | 4.892896 | 2 Q.NAVEQE\ Splice@chr   | 9.74E-12 | 2.04E-04 |
| 22Feb2011 | 26313 | 916.98  | -20.1114 | 4 R.YEKVIFN chr5@1391    | 4.26E-11 | 0.001286 |
| 22Feb2011 | 12315 | 705.83  | -3.72364 | 2 M.PSMEEV chr5@4890     | 2.03E-13 | 0        |
| 22Feb2011 | 23767 | 962.48  | -5.65099 | 3 R.WFWGQI chr4@3030     | 4.89E-10 | 0.009298 |
| 22Feb2011 | 2742  | 536.29  | -10.9462 | 2 _..QVEFNPII Splice@chr | 4.60E-10 | 0.008933 |
| 22Feb2011 | 6983  | 404.22  | 20.84272 | 2 R.TSGGGG\ chr1@3738    | 4.46E-10 | 0.008741 |
| 22Feb2011 | 15214 | 938.46  | 22.50833 | 2 R.ECSQSDS chr2@8876    | 1.90E-10 | 0.004199 |
| 22Feb2011 | 23384 | 774.46  | 22.64844 | 2 K.WAELVVI chr3@1117    | 8.19E-12 | 1.05E-04 |
| 22Feb2011 | 14503 | 887.93  | 29.43791 | 2 I.DEREESTN Splice@chr  | 2.04E-10 | 0.004338 |

|           |       |         |          |                         |          |          |
|-----------|-------|---------|----------|-------------------------|----------|----------|
| 22Feb2011 | 22737 | 792.15  | -18.5783 | 4 K.SGTIFDNI Splice@chr | 2.48E-18 | 0        |
| 22Feb2011 | 16741 | 888.97  | 20.94366 | 2 K.DITLEVEA Splice@chr | 1.74E-11 | 2.95E-04 |
| 22Feb2011 | 297   | 594.8   | -20.0434 | 2 R.KMGIEAC chr2@1114   | 2.14E-10 | 0.006258 |
| 22Feb2011 | 2444  | 741.39  | -17.2291 | 2 K.QKSNWH chr5@1229    | 2.02E-11 | 4.83E-04 |
| 22Feb2011 | 20235 | 1007.85 | 5.172966 | 3 R.CWNRRA Splice@chr   | 7.50E-12 | 2.65E-04 |
| 22Feb2011 | 14506 | 622.33  | 9.587405 | 2 R.AK+14.01 chr2@4270  | 1.05E-10 | 0.003196 |
| 22Feb2011 | 21515 | 795.65  | -15.5001 | 4 K.SGTIFDNI Splice@chr | 7.92E-14 | 0        |
| 22Feb2011 | 21496 | 1060.53 | -16.1915 | 3 K.SGTIFDNI Splice@chr | 9.92E-14 | 0        |
| 22Feb2011 | 18721 | 1064.19 | -19.6578 | 3 K.SGDAGIV Splice@chr  | 9.68E-12 | 3.79E-04 |
| 22Feb2011 | 18724 | 798.4   | -12.6137 | 4 K.SGDAGIV Splice@chr  | 1.94E-10 | 0.005693 |
| 22Feb2011 | 21598 | 968.13  | 18.26018 | 3 _GCSIVPIS Splice@chr  | 9.25E-11 | 0.003196 |
| 22Feb2011 | 2497  | 741.38  | -23.1647 | 2 K.FPENRHI chr2@1477   | 2.72E-10 | 0.007731 |
| 22Feb2011 | 16667 | 722.45  | -4.95112 | 2 R.RK+14.01 Splice@chr | 7.84E-11 | 0.002728 |
| 22Feb2011 | 6456  | 1025.61 | -11.6755 | 1 K.LGLGSL chr5@4945    | 1.29E-11 | 3.79E-04 |
| 22Feb2011 | 23403 | 1147.24 | 4.705638 | 3 R.FQSAAIG Splice@chr  | 5.53E-14 | 0        |
| 22Feb2011 | 24297 | 1147.23 | -4.02971 | 3 R.FQSAAIG Splice@chr  | 4.52E-11 | 0.002045 |
| 22Feb2011 | 19082 | 1003.18 | 7.145987 | 3 R.CWNRRA Splice@chr   | 2.56E-12 | 1.46E-04 |
| 22Feb2011 | 17303 | 732.07  | 19.51873 | 3 R.ATDDWII Splice@chr  | 1.81E-10 | 0.004999 |
| 22Feb2011 | 13083 | 887.93  | 29.43791 | 2 I.DEREESTN Splice@chr | 2.14E-10 | 0.006258 |
| 22Feb2011 | 21257 | 795.65  | -15.5001 | 4 K.SGTIFDNI Splice@chr | 9.45E-15 | 0        |
| 22Feb2011 | 14450 | 622.33  | 9.587405 | 2 R.AK+14.01 chr2@4270  | 1.12E-10 | 0.003282 |
| 22Feb2011 | 24183 | 828.38  | -20.1128 | 2 K.PNLK+14 chr2@3862   | 8.09E-11 | 0.00283  |
| 22Feb2011 | 18770 | 1063.86 | -15.3899 | 3 K.SGDAGIV Splice@chr  | 1.91E-10 | 0.005594 |
| 22Feb2011 | 18775 | 798.4   | -12.6137 | 4 K.SGDAGIV Splice@chr  | 1.45E-10 | 0.004049 |
| 22Feb2011 | 11727 | 484.31  | 18.81723 | 2 K.ILIATTHA chr3@2129  | 1.44E-10 | 0.003953 |
| 22Feb2011 | 11237 | 851.48  | -15.2578 | 2 K.RGVRLSH chr2@2785   | 1.52E-10 | 0.004236 |
| 22Feb2011 | 6499  | 554.95  | 17.04197 | 3 R.M+15.99 chr3@1018   | 2.46E-12 | 1.46E-04 |
| 22Feb2011 | 24074 | 770.76  | -24.193  | 3 K.YLDAKCK chr4@3751   | 3.40E-10 | 0.008799 |
| 22Feb2011 | 14058 | 938.46  | 22.50833 | 2 R.ECSQSDS chr2@8876   | 2.19E-10 | 0.006518 |
| 22Feb2011 | 3707  | 626.8   | -12.4435 | 2 R.LCESGAA Splice@chr  | 4.01E-16 | 0        |
| 22Feb2011 | 20474 | 634.83  | -9.39461 | 2 R.VDIGDILF Splice@chr | 1.07E-12 | 0        |
| 22Feb2011 | 19807 | 1003.18 | 7.145987 | 3 R.CWNRRA Splice@chr   | 1.39E-11 | 4.83E-04 |
| 22Feb2011 | 14482 | 1153.22 | -26.2628 | 3 F.EGIRTGG Splice@chr  | 2.30E-10 | 0.006518 |
| 22Feb2011 | 23788 | 1147.24 | 4.705638 | 3 R.FQSAAIG Splice@chr  | 3.13E-13 | 0        |
| 22Feb2011 | 19024 | 864.94  | 10.49869 | 2 R.KSSTLMR chr4@1655   | 1.22E-11 | 3.79E-04 |
| 22Feb2011 | 21582 | 799.15  | -20.3276 | 4 K.SGTIFDNI Splice@chr | 1.55E-12 | 0        |
| 22Feb2011 | 19186 | 873.46  | 2.276184 | 2 R.SIFVDLEP Splice@chr | 1.25E-11 | 3.79E-04 |
| 22Feb2011 | 23230 | 799.15  | -20.3276 | 4 K.SGTIFDNI Splice@chr | 3.11E-11 | 0.001172 |
| 22Feb2011 | 23489 | 1147.24 | 4.705638 | 3 R.FQSAAIG Splice@chr  | 2.49E-14 | 0        |
| 22Feb2011 | 19855 | 1003.18 | 7.145987 | 3 R.CWNRRA Splice@chr   | 2.61E-13 | 0        |
| 22Feb2011 | 20107 | 957.5   | 22.57714 | 3 K.LFQVLQN Splice@chr  | 1.55E-10 | 0.004236 |
| 22Feb2011 | 7450  | 724.34  | 5.400383 | 3 V.CLTEEGK Splice@chr  | 1.52E-10 | 0.004236 |
| 22Feb2011 | 3650  | 626.8   | -12.4435 | 2 R.LCESGAA Splice@chr  | 5.16E-16 | 0        |
| 22Feb2011 | 19135 | 1003.18 | 7.145987 | 3 R.CWNRRA Splice@chr   | 1.18E-12 | 0        |
| 22Feb2011 | 5188  | 434.24  | 13.9946  | 3 _RSNDQTI chr5@6378    | 1.45E-10 | 0.004049 |
| 22Feb2011 | 21841 | 799.15  | -20.3276 | 4 K.SGTIFDNI Splice@chr | 9.42E-15 | 0        |
| 22Feb2011 | 13047 | 484.61  | 1.222351 | 3 K.ISSAIAMF chr4@7544  | 6.18E-11 | 0.002543 |

|           |       |         |          |                          |          |          |
|-----------|-------|---------|----------|--------------------------|----------|----------|
| 22Feb2011 | 21647 | 968.13  | 18.26018 | 3 _GCSIVPIS Splice@chr   | 1.97E-11 | 4.83E-04 |
| 22Feb2011 | 23443 | 1147.24 | 4.705638 | 3 R.FQSAAIG Splice@chr   | 2.31E-15 | 0        |
| 22Feb2011 | 19908 | 1003.51 | 2.70076  | 3 R.CWNRRA Splice@chr    | 1.78E-11 | 4.83E-04 |
| 22Feb2011 | 3831  | 626.8   | -12.4435 | 2 R.LCESGAA Splice@chr   | 4.20E-16 | 0        |
| 22Feb2011 | 17229 | 1060.15 | -15.5056 | 3 I.SRSAAMF Splice@chr   | 1.28E-17 | 0        |
| 22Feb2011 | 3766  | 626.8   | -12.4435 | 2 R.LCESGAA Splice@chr   | 3.60E-16 | 0        |
| 22Feb2011 | 8927  | 521.28  | 1.17314  | 3 K.ALEKEDIF chr1@1462   | 1.69E-11 | 4.83E-04 |
| 22Feb2011 | 22100 | 799.15  | -20.3276 | 4 K.SGTIFDNI Splice@chr  | 1.93E-11 | 4.83E-04 |
| 22Feb2011 | 4860  | 454.75  | 8.810814 | 2 K.TDLAYLG chr4@1545    | 3.85E-10 | 0.009664 |
| 22Feb2011 | 24265 | 1147.24 | 4.705638 | 3 R.FQSAAIG Splice@chr   | 1.06E-12 | 0        |
| 22Feb2011 | 23824 | 1147.24 | 4.705638 | 3 R.FQSAAIG Splice@chr   | 5.47E-14 | 0        |
| 22Feb2011 | 20010 | 1007.85 | 5.172966 | 3 R.CWNRRA Splice@chr    | 1.58E-10 | 0.004333 |
| 22Feb2011 | 12984 | 484.27  | -10.2722 | 3 K.ISSAIAMf chr4@7544   | 6.10E-12 | 2.65E-04 |
| 22Feb2011 | 21902 | 795.65  | -23.4135 | 4 K.SGTIFDNI Splice@chr  | 5.61E-14 | 0        |
| 22Feb2011 | 15307 | 1056.56 | 28.0642  | 3 I.SRVEDDS Splice@chr   | 1.35E-11 | 4.83E-04 |
| 22Feb2011 | 20433 | 634.83  | -9.39461 | 2 R.VDIGDILF Splice@chr  | 1.72E-12 | 0        |
| 22Feb2011 | 23204 | 654.72  | 3.395178 | 3 L.IILSSTTLR Splice@chr | 5.24E-11 | 0.002135 |
| 22Feb2011 | 2393  | 741.38  | -23.1647 | 2 K.FPENRHL chr2@1477    | 2.19E-10 | 0.006518 |
| 22Feb2011 | 10873 | 705.83  | -3.72364 | 2 M.PSMEEV Splice@chr    | 2.87E-11 | 9.46E-04 |
| 22Feb2011 | 10560 | 782.4   | -16.2268 | 3 I.NQSSM+1 chr2@6685    | 2.37E-10 | 0.006703 |
| 22Feb2011 | 19962 | 1008.18 | 0.829193 | 3 R.CWNRRA Splice@chr    | 6.92E-12 | 2.65E-04 |
| 22Feb2011 | 21544 | 1060.53 | -24.105  | 3 K.SGTIFDNI Splice@chr  | 2.75E-13 | 0        |
| 22Feb2011 | 23026 | 799.15  | -20.3276 | 4 K.SGTIFDNI Splice@chr  | 1.17E-12 | 0        |
| 22Feb2011 | 13141 | 887.93  | 29.43791 | 2 I.DEREESTM Splice@chr  | 3.59E-11 | 0.001276 |
| 22Feb2011 | 20144 | 973.45  | 6.192833 | 3 _GCSIVPIS Splice@chr   | 1.64E-10 | 0.004523 |
| 22Feb2011 | 21425 | 984.81  | -24.8852 | 3 K.SGTIFDNI Splice@chr  | 6.53E-11 | 0.002543 |
| 22Feb2011 | 9090  | 724.34  | 5.400383 | 3 V.CLTEEGK Splice@chr   | 5.52E-12 | 2.56E-04 |
| 22Feb2011 | 22739 | 967.8   | -22.7269 | 3 _AVPFVPI Splice@chr    | 2.95E-10 | 0.008719 |
| 22Feb2011 | 20285 | 761.88  | -3.44933 | 4 K.SGDAGIV Splice@chr   | 5.53E-11 | 0.002518 |
| 22Feb2011 | 4447  | 411.55  | -26.8589 | 3 K.ALQM+1 chr3@1125     | 1.90E-10 | 0.006565 |
| 22Feb2011 | 8082  | 1089.65 | -29.1532 | 1 K.KLKSMKN chr5@3701    | 1.62E-10 | 0.005774 |
| 22Feb2011 | 15939 | 622.33  | 9.587405 | 2 R.AK+14.01 chr2@4270   | 1.69E-10 | 0.005951 |
| 22Feb2011 | 23909 | 929.15  | -28.8338 | 3 R.KSTAKLK chr2@8595    | 9.61E-11 | 0.003445 |
| 22Feb2011 | 14680 | 887.93  | 29.43791 | 2 I.DEREESTM Splice@chr  | 2.54E-10 | 0.007571 |
| 22Feb2011 | 6067  | 626.8   | -12.4435 | 2 R.LCESGAA Splice@chr   | 5.22E-16 | 0        |
| 22Feb2011 | 9146  | 724.34  | 5.400383 | 3 V.CLTEEGK Splice@chr   | 4.43E-11 | 0.002233 |
| 22Feb2011 | 18504 | 1167.55 | -25.3067 | 2 L.K+14.016 Splice@chr  | 4.34E-13 | 0        |
| 22Feb2011 | 22479 | 795.65  | -23.4135 | 4 K.SGTIFDNI Splice@chr  | 4.00E-13 | 0        |
| 22Feb2011 | 19613 | 953.26  | 21.08789 | 4 _CSSFFFKL chr4@1457    | 1.43E-10 | 0.00493  |
| 22Feb2011 | 24492 | 688.75  | 8.895763 | 5 R.FQSAAIG Splice@chr   | 3.02E-11 | 0.001734 |
| 22Feb2011 | 12183 | 747.76  | -8.61645 | 5 S.HLPRPGH Splice@chr   | 2.78E-10 | 0.008116 |
| 22Feb2011 | 10358 | 509.3   | -20.473  | 2 R.SSVIMLIV chr2@5767   | 2.62E-10 | 0.007571 |
| 22Feb2011 | 22321 | 795.65  | -15.5001 | 4 K.SGTIFDNI Splice@chr  | 2.16E-12 | 0        |
| 22Feb2011 | 25222 | 828.38  | -20.1128 | 2 K.PNLK+14 chr2@3862    | 4.05E-11 | 0.002233 |
| 22Feb2011 | 24458 | 1147.24 | 4.705638 | 3 R.FQSAAIG Splice@chr   | 5.49E-16 | 0        |
| 22Feb2011 | 17660 | 774.91  | -21.0434 | 4 _NETGLNK chr3@7952     | 1.14E-10 | 0.004221 |
| 22Feb2011 | 25500 | 760.4   | -4.0463  | 3 _TQTNTKI chrX@7978     | 1.14E-10 | 0.004122 |

|           |       |         |          |                           |          |          |
|-----------|-------|---------|----------|---------------------------|----------|----------|
| 22Feb2011 | 25425 | 760.4   | -4.0463  | 3 _..TQTNTKI\ chrX@7978   | 1.56E-10 | 0.005594 |
| 22Feb2011 | 15237 | 858.47  | -5.67211 | 3 _..LETGIKPI\ Splice@chr | 3.37E-11 | 0.00206  |
| 22Feb2011 | 21755 | 634.84  | 6.410455 | 2 R.VDIGDILF Splice@chr   | 7.07E-13 | 0        |
| 22Feb2011 | 22864 | 795.65  | -15.5001 | 4 K.SGTIFDNI Splice@chr   | 1.16E-12 | 0        |
| 22Feb2011 | 15352 | 858.48  | 6.006088 | 3 _..LETGIKPI\ Splice@chr | 1.86E-11 | 9.51E-04 |
| 22Feb2011 | 21112 | 897.46  | 8.122101 | 4 R.FWFFGKI\ chr2@7020    | 2.71E-10 | 0.007745 |
| 22Feb2011 | 16202 | 1153.22 | -26.2628 | 3 F.EGIRTGG\ Splice@chr   | 1.02E-13 | 0        |
| 22Feb2011 | 22707 | 795.65  | -23.4135 | 4 K.SGTIFDNI Splice@chr   | 5.62E-14 | 0        |
| 22Feb2011 | 20678 | 1007.86 | 15.19559 | 3 R.CWNRRA Splice@chr     | 3.64E-11 | 0.002147 |
| 22Feb2011 | 22998 | 795.65  | -15.5001 | 4 K.SGTIFDNI Splice@chr   | 1.23E-15 | 0        |
| 22Feb2011 | 14466 | 484.61  | 1.222351 | 3 K.ISSAIAMF\ chr4@7544   | 1.90E-11 | 9.51E-04 |
| 22Feb2011 | 9311  | 431.74  | 5.455516 | 2 _..PIQDVYK Splice@chr   | 2.09E-10 | 0.00702  |
| 22Feb2011 | 1452  | 643.82  | -13.9575 | 2 R.M+15.99 chr5@1877     | 2.17E-10 | 0.007088 |
| 22Feb2011 | 10639 | 521.28  | 1.17314  | 3 K.ALEKEDIF\ chr1@1462   | 1.02E-10 | 0.003629 |
| 22Feb2011 | 16880 | 888.97  | 20.94366 | 2 K.DITLEVEA\ Splice@chr  | 1.46E-12 | 0        |
| 22Feb2011 | 22414 | 980.47  | -17.2661 | 3 K.SGTIFDNI Splice@chr   | 3.52E-11 | 0.002147 |
| 22Feb2011 | 23704 | 795.65  | -15.5001 | 4 K.SGTIFDNI Splice@chr   | 2.42E-15 | 0        |
| 22Feb2011 | 14520 | 484.27  | -10.2722 | 3 K.ISSAIAMF\ chr4@7544   | 4.86E-12 | 2.56E-04 |
| 22Feb2011 | 19917 | 798.15  | -11.5616 | 4 K.SGDAGIV Splice@chr    | 6.21E-11 | 0.002921 |
| 22Feb2011 | 16478 | 759.4   | -15.0495 | 2 K.FIDANLQ\ chr4@8206    | 5.80E-11 | 0.002719 |
| 22Feb2011 | 22758 | 795.65  | -15.5001 | 4 K.SGTIFDNI Splice@chr   | 1.85E-14 | 0        |
| 22Feb2011 | 11113 | 765.42  | 8.590547 | 2 K.LLPVNQP Splice@chr    | 8.97E-11 | 0.003357 |
| 22Feb2011 | 16640 | 1056.56 | 28.0642  | 3 I.SRVEDDS\ Splice@chr   | 1.58E-14 | 0        |
| 22Feb2011 | 22566 | 980.48  | -7.04314 | 3 K.SGTIFDNI Splice@chr   | 6.31E-12 | 2.56E-04 |
| 22Feb2011 | 24491 | 860.68  | 2.433027 | 4 R.FQSAAIG Splice@chr    | 3.52E-15 | 0        |
| 22Feb2011 | 19076 | 867.47  | -26.9785 | 2 K.HKWLQR Splice@chr     | 1.54E-10 | 0.005594 |
| 22Feb2011 | 19920 | 1063.86 | -15.3899 | 3 K.SGDAGIV Splice@chr    | 3.15E-12 | 1.42E-04 |
| 22Feb2011 | 5704  | 787.43  | -1.78505 | 1 K.SDAAPAK\ chrX@8018    | 3.29E-10 | 0.009312 |
| 22Feb2011 | 21031 | 1003.18 | 7.145987 | 3 R.CWNRRA Splice@chr     | 1.22E-12 | 0        |
| 22Feb2011 | 14741 | 606.66  | -18.8783 | 3 I.NRFNISK\ chrX@1250    | 3.21E-10 | 0.009128 |
| 22Feb2011 | 21304 | 973.46  | 16.48633 | 3 _..GCSIVPIS Splice@chr  | 2.12E-11 | 9.51E-04 |
| 22Feb2011 | 22657 | 795.65  | -15.5001 | 4 K.SGTIFDNI Splice@chr   | 1.18E-13 | 0        |
| 22Feb2011 | 18519 | 1060.15 | -15.5056 | 3 I.SRSAAMF Splice@chr    | 4.73E-15 | 0        |
| 22Feb2011 | 3171  | 587.3   | 4.892896 | 2 Q.NAVEQE\ Splice@chr    | 1.65E-11 | 8.51E-04 |
| 22Feb2011 | 5366  | 741.38  | -23.1647 | 2 K.FPENRHI\ chr2@1477    | 1.65E-10 | 0.005869 |
| 22Feb2011 | 6125  | 626.8   | -12.4435 | 2 R.LCESGAA Splice@chr    | 8.79E-16 | 0        |
| 22Feb2011 | 24853 | 1147.24 | 4.705638 | 3 R.FQSAAIG Splice@chr    | 2.24E-15 | 0        |
| 22Feb2011 | 18450 | 1167.55 | -25.3067 | 2 L.K+14.016 Splice@chr   | 8.30E-14 | 0        |
| 22Feb2011 | 22677 | 1060.54 | -6.74128 | 3 K.SGTIFDNI Splice@chr   | 5.67E-13 | 0        |
| 22Feb2011 | 21714 | 634.84  | 6.410455 | 2 R.VDIGDILF Splice@chr   | 1.07E-12 | 0        |
| 22Feb2011 | 2617  | 439.73  | -4.03447 | 2 R.SIAMFGP\ chr2@4157    | 1.77E-10 | 0.006131 |
| 22Feb2011 | 14625 | 887.93  | 29.43791 | 2 I.DEREESTN\ Splice@chr  | 2.74E-11 | 0.001632 |
| 22Feb2011 | 23683 | 606.63  | -14.6199 | 3 K.KCNEEGC\ chr3@1174    | 4.70E-11 | 0.002326 |
| 22Feb2011 | 15292 | 858.47  | -5.67211 | 3 _..LETGIKPI\ Splice@chr | 5.48E-15 | 0        |
| 22Feb2011 | 22424 | 795.65  | -15.5001 | 4 K.SGTIFDNI Splice@chr   | 6.17E-15 | 0        |
| 22Feb2011 | 2055  | 643.82  | -13.9575 | 2 R.M+15.99 chr5@1877     | 3.06E-10 | 0.00897  |
| 22Feb2011 | 22363 | 795.65  | -15.5001 | 4 K.SGTIFDNI Splice@chr   | 6.09E-15 | 0        |

|           |       |         |          |                         |          |          |
|-----------|-------|---------|----------|-------------------------|----------|----------|
| 22Feb2011 | 23689 | 860.69  | 14.08015 | 4 R.FQSAAIG Splice@chr  | 8.81E-13 | 0        |
| 22Feb2011 | 14433 | 607     | -9.70672 | 3 I.NRFNISK chrX@125C   | 1.02E-10 | 0.002059 |
| 22Feb2011 | 5870  | 626.8   | -12.4435 | 2 R.LCESGAA Splice@chr  | 3.60E-16 | 0        |
| 22Feb2011 | 10081 | 616.33  | -16.7632 | 2 K.LSKSVIFQ chr3@279E  | 4.17E-10 | 0.009058 |
| 22Feb2011 | 22349 | 1060.54 | -6.74128 | 3 K.SGTIFDNI Splice@chr | 2.76E-12 | 2.88E-04 |
| 22Feb2011 | 22265 | 795.65  | -15.5001 | 4 K.SGTIFDNI Splice@chr | 2.75E-10 | 0.006087 |
| 22Feb2011 | 22658 | 795.65  | -23.4135 | 4 K.SGTIFDNI Splice@chr | 5.79E-15 | 0        |
| 22Feb2011 | 14166 | 484.27  | -10.2722 | 3 K.ISSAIAMF chr4@754E  | 1.33E-11 | 5.01E-04 |
| 22Feb2011 | 5127  | 741.38  | -23.1647 | 2 K.FPENRHI chr2@147E   | 4.58E-10 | 0.009869 |
| 22Feb2011 | 22594 | 799.16  | -7.85909 | 4 K.SGTIFDNI Splice@chr | 3.84E-10 | 0.008809 |
| 22Feb2011 | 15000 | 858.48  | 6.006088 | 3 _LETGIKPI Splice@chr  | 3.62E-13 | 0        |
| 22Feb2011 | 7520  | 460.25  | -17.4268 | 2 K.YPGIGGI Splice@chr  | 1.59E-10 | 0.003649 |
| 22Feb2011 | 22032 | 792.15  | -18.5783 | 4 K.SGTIFDNI Splice@chr | 5.39E-17 | 0        |
| 22Feb2011 | 23072 | 962.47  | -16.0654 | 3 R.WFWGQI chr4@303C    | 2.93E-10 | 0.00654  |
| 22Feb2011 | 18184 | 1059.81 | -20.7519 | 3 I.SRSAAMF Splice@chr  | 1.43E-16 | 0        |
| 22Feb2011 | 21435 | 634.84  | 6.410455 | 2 R.VDIGDILF Splice@chr | 4.47E-13 | 0        |
| 22Feb2011 | 14491 | 607     | -9.70672 | 3 I.NRFNISK chrX@125C   | 1.15E-10 | 0.002476 |
| 22Feb2011 | 5178  | 741.38  | -23.1647 | 2 K.FPENRHI chr2@147E   | 2.62E-10 | 0.005411 |
| 22Feb2011 | 5809  | 456.29  | -1.0042  | 2 R.RAAAPLR Splice@chr  | 1.09E-10 | 0.002163 |
| 22Feb2011 | 5816  | 626.8   | -12.4435 | 2 R.LCESGAA Splice@chr  | 3.04E-16 | 0        |
| 22Feb2011 | 22237 | 980.47  | -17.2661 | 3 K.SGTIFDNI Splice@chr | 7.29E-11 | 0.001228 |
| 22Feb2011 | 7964  | 1089.65 | -29.1532 | 1 K.KLKSMKI chr5@370E   | 8.12E-11 | 0.00165  |
| 22Feb2011 | 6612  | 440.72  | 0.555229 | 2 _QGFTNW chr4@102E     | 4.30E-10 | 0.009139 |
| 22Feb2011 | 7576  | 460.25  | -17.4268 | 2 K.YPGIGGI Splice@chr  | 3.81E-10 | 0.008746 |
| 22Feb2011 | 16053 | 1034.06 | -10.3984 | 2 K.FK+14.01 Splice@chr | 4.52E-11 | 9.24E-04 |
| 22Feb2011 | 1403  | 587.8   | 2.031861 | 2 Q.NAVEQE Splice@chr   | 2.13E-10 | 0.005064 |
| 22Feb2011 | 869   | 409.74  | -10.6768 | 2 K.MVITNLK Splice@chr  | 3.68E-10 | 0.008471 |
| 22Feb2011 | 19939 | 864.94  | 10.49869 | 2 R.KSSTLMR chr4@165E   | 5.81E-12 | 4.08E-04 |
| 22Feb2011 | 1367  | 587.8   | 2.031861 | 2 Q.NAVEQE Splice@chr   | 5.29E-11 | 0.00103  |
| 22Feb2011 | 21629 | 912.47  | 1.441699 | 2 R.TMLELIN chr1@137E   | 2.56E-12 | 2.88E-04 |
| 22Feb2011 | 21390 | 634.84  | 6.410455 | 2 R.VDIGDILF Splice@chr | 4.03E-13 | 0        |
| 22Feb2011 | 20731 | 1003.18 | 7.145987 | 3 R.CWNRRA Splice@chr   | 1.58E-12 | 2.88E-04 |
| 22Feb2011 | 5928  | 626.8   | -12.4435 | 2 R.LCESGAA Splice@chr  | 1.47E-16 | 0        |
| 22Feb2011 | 20935 | 957.5   | 22.57714 | 3 K.LFQVLQN Splice@chr  | 3.07E-10 | 0.007123 |
| 22Feb2011 | 14886 | 858.47  | -5.67211 | 3 _LETGIKPI Splice@chr  | 2.25E-13 | 0        |
| 22Feb2011 | 14220 | 484.27  | -10.2722 | 3 K.ISSAIAMF chr4@754E  | 9.00E-12 | 5.01E-04 |
| 22Feb2011 | 11173 | 747.57  | 5.690177 | 5 S.HLPRPGH Splice@chr  | 3.19E-10 | 0.007494 |
| 22Feb2011 | 17918 | 822.95  | -1.29899 | 2 _NKVINFD Splice@chr   | 3.24E-11 | 7.16E-04 |
| 22Feb2011 | 21889 | 975.8   | -15.4281 | 3 K.SGTIFDNI Splice@chr | 2.19E-10 | 0.005064 |
| 22Feb2011 | 1994  | 439.91  | 17.33685 | 3 K.NSQKNPI chr2@354C   | 2.08E-10 | 0.004996 |
| 22Feb2011 | 16482 | 888.97  | 20.94366 | 2 K.DITLEVEA Splice@chr | 1.45E-11 | 5.01E-04 |
| 22Feb2011 | 16187 | 1056.56 | 28.0642  | 3 I.SRVEDDS Splice@chr  | 6.50E-14 | 0        |
| 22Feb2011 | 22449 | 795.65  | -15.5001 | 4 K.SGTIFDNI Splice@chr | 2.06E-13 | 0        |
| 22Feb2011 | 14398 | 887.93  | 29.43791 | 2 I.DEREESTA Splice@chr | 1.31E-10 | 0.002659 |
| 22Feb2011 | 22697 | 795.65  | -15.5001 | 4 K.SGTIFDNI Splice@chr | 2.34E-13 | 0        |
| 22Feb2011 | 24101 | 828.39  | -8.00743 | 2 K.PNLK+14 chr2@386E   | 3.20E-10 | 0.007494 |
| 22Feb2011 | 9098  | 431.74  | 5.455516 | 2 _PIQDVYK Splice@chr   | 3.75E-10 | 0.008659 |

|           |       |         |          |                          |          |          |
|-----------|-------|---------|----------|--------------------------|----------|----------|
| 22Feb2011 | 1489  | 587.8   | 2.031861 | 2 Q.NAVEQE' Splice@chr   | 4.17E-10 | 0.009058 |
| 22Feb2011 | 9119  | 862.47  | 2.904885 | 1 _PIQDVYK Splice@chr    | 1.80E-10 | 0.004228 |
| 22Feb2011 | 2035  | 439.91  | 17.33685 | 3 K.NSQKNPI chr2@3540    | 1.63E-10 | 0.003739 |
| 22Feb2011 | 14941 | 858.47  | -5.67211 | 3 _LETGIKPI Splice@chr   | 5.08E-14 | 0        |
| 22Feb2011 | 16443 | 792.42  | 5.26594  | 4 R.TTGVVLD chr2@1512    | 3.52E-10 | 0.008119 |
| 22Feb2011 | 24264 | 760.4   | -4.0463  | 3 _TQTNTKI' chrX@7978    | 4.69E-10 | 0.009952 |
| 22Feb2011 | 23923 | 1147.24 | 4.705638 | 3 R.FQSAAIG Splice@chr   | 6.38E-12 | 4.08E-04 |
| 22Feb2011 | 23217 | 795.65  | -15.5001 | 4 K.SGTIFDNI Splice@chr  | 8.91E-16 | 0        |
| 22Feb2011 | 22500 | 795.65  | -23.4135 | 4 K.SGTIFDNI Splice@chr  | 1.01E-12 | 0        |
| 22Feb2011 | 1117  | 409.74  | -10.6768 | 2 K.MVITNLK Splice@chr   | 4.67E-10 | 0.009952 |
| 22Feb2011 | 23727 | 860.69  | 14.08015 | 4 R.FQSAAIG Splice@chr   | 2.32E-11 | 7.16E-04 |
| 22Feb2011 | 24116 | 828.39  | -8.00743 | 2 K.PNLK+14 chr2@3862    | 1.04E-11 | 5.01E-04 |
| 22Feb2011 | 12485 | 851.48  | -15.2578 | 2 K.RGVRLSH chr2@2785    | 2.29E-10 | 0.005154 |
| 22Feb2011 | 2882  | 587.8   | 2.031861 | 2 Q.NAVEQE' Splice@chr   | 1.25E-10 | 0.003705 |
| 22Feb2011 | 16554 | 759.4   | -15.0495 | 2 K.FIDANLQ chr4@8206    | 2.91E-10 | 0.007209 |
| 22Feb2011 | 17065 | 888.47  | 22.8338  | 2 K.DITLEVEA' Splice@chr | 6.26E-12 | 3.44E-04 |
| 22Feb2011 | 8271  | 1025.61 | -11.6755 | 1 K.LGLGSGL chr5@4945    | 2.98E-11 | 0.001136 |
| 22Feb2011 | 23529 | 774.46  | 22.64844 | 2 K.WAELVVI chr3@1117    | 1.03E-10 | 0.003007 |
| 22Feb2011 | 22172 | 634.84  | 6.410455 | 2 R.VDIGDILF Splice@chr  | 2.67E-13 | 0        |
| 22Feb2011 | 23148 | 795.65  | -23.4135 | 4 K.SGTIFDNI Splice@chr  | 1.27E-13 | 0        |
| 22Feb2011 | 15328 | 858.48  | 6.006088 | 3 _LETGIKPI Splice@chr   | 8.94E-15 | 0        |
| 22Feb2011 | 18047 | 722.45  | -4.95112 | 2 R.RK+14.01 Splice@chr  | 2.43E-10 | 0.006088 |
| 22Feb2011 | 24807 | 984.81  | -24.8852 | 3 K.SGTIFDNI Splice@chr  | 1.56E-11 | 7.71E-04 |
| 22Feb2011 | 9450  | 431.74  | 5.455516 | 2 _PIQDVYK Splice@chr    | 2.38E-10 | 0.006007 |
| 22Feb2011 | 21672 | 957.5   | 22.57714 | 3 K.LFQVLQN Splice@chr   | 2.69E-10 | 0.006657 |
| 22Feb2011 | 10086 | 752.39  | 6.092325 | 2 R.LVVYGAN Splice@chr   | 6.09E-14 | 0        |
| 22Feb2011 | 6139  | 626.8   | -12.4435 | 2 R.LCESGAA Splice@chr   | 3.85E-16 | 0        |
| 22Feb2011 | 9294  | 423.26  | -10.1904 | 2 R.STVAAKIF chr3@3293   | 2.63E-10 | 0.00649  |
| 22Feb2011 | 6572  | 463.24  | 9.837402 | 2 K.NTSEIFSK chr3@1171   | 2.30E-10 | 0.005758 |
| 22Feb2011 | 16706 | 1056.56 | 28.0642  | 3 I.SRVEDDS' Splice@chr  | 8.10E-14 | 0        |
| 22Feb2011 | 21057 | 1003.19 | 17.13413 | 3 R.CWNRRA Splice@chr    | 9.75E-11 | 0.002742 |
| 22Feb2011 | 21392 | 1003.18 | 7.145987 | 3 R.CWNRRA Splice@chr    | 2.45E-13 | 0        |
| 22Feb2011 | 21397 | 1007.85 | 5.172966 | 3 R.CWNRRA Splice@chr    | 5.95E-12 | 3.44E-04 |
| 22Feb2011 | 24321 | 984.82  | -14.7074 | 3 K.SGTIFDNI Splice@chr  | 2.06E-10 | 0.005072 |
| 22Feb2011 | 24328 | 795.65  | -15.5001 | 4 K.SGTIFDNI Splice@chr  | 1.14E-16 | 0        |
| 22Feb2011 | 23246 | 795.65  | -15.5001 | 4 K.SGTIFDNI Splice@chr  | 4.09E-16 | 0        |
| 22Feb2011 | 23098 | 795.4   | -22.3578 | 4 K.SGTIFDNI Splice@chr  | 2.73E-11 | 0.001136 |
| 22Feb2011 | 17008 | 792.42  | 5.26594  | 4 R.TTGVVLD chr2@1512    | 3.84E-10 | 0.009336 |
| 22Feb2011 | 17000 | 888.47  | 22.8338  | 2 K.DITLEVEA' Splice@chr | 6.52E-11 | 0.001663 |
| 22Feb2011 | 22942 | 795.65  | -15.5001 | 4 K.SGTIFDNI Splice@chr  | 1.74E-14 | 0        |
| 22Feb2011 | 21627 | 957.5   | 22.57714 | 3 K.LFQVLQN Splice@chr   | 2.73E-11 | 0.001136 |
| 22Feb2011 | 23207 | 968.13  | 18.26018 | 3 _GCSIVPIS Splice@chr   | 1.10E-10 | 0.003187 |
| 22Feb2011 | 23199 | 795.65  | -15.5001 | 4 K.SGTIFDNI Splice@chr  | 4.58E-15 | 0        |
| 22Feb2011 | 6193  | 626.8   | -12.4435 | 2 R.LCESGAA Splice@chr   | 3.67E-16 | 0        |
| 22Feb2011 | 24578 | 929.15  | -28.8338 | 3 R.KSTAKLK' chr2@8593   | 2.26E-10 | 0.005673 |
| 22Feb2011 | 8249  | 1089.65 | -29.1532 | 1 K.KLKSMKN chr5@3701    | 1.62E-10 | 0.004439 |
| 22Feb2011 | 26074 | 828.38  | -20.1128 | 2 K.PNLK+14 chr2@3862    | 1.39E-10 | 0.004122 |

|           |       |         |          |                         |          |          |
|-----------|-------|---------|----------|-------------------------|----------|----------|
| 22Feb2011 | 16655 | 1056.56 | 28.0642  | 3 I.SRVEDDS( Splice@chr | 1.85E-16 | 0        |
| 22Feb2011 | 26129 | 828.39  | -8.00743 | 2 K.PNLK+14 chr2@3862   | 4.10E-10 | 0.009736 |
| 22Feb2011 | 22725 | 975.8   | -15.4281 | 3 K.SGTIFDNI Splice@chr | 1.36E-10 | 0.004053 |
| 22Feb2011 | 19122 | 895     | -10.9918 | 2 K.M+15.99 chrX@1445   | 3.53E-10 | 0.008661 |
| 22Feb2011 | 25214 | 688.75  | 8.895763 | 5 R.FQSAAIG Splice@chr  | 5.65E-11 | 0.001474 |
| 22Feb2011 | 15269 | 858.47  | -5.67211 | 3 _LETGIIPi Splice@chr  | 1.35E-13 | 0        |
| 22Feb2011 | 21029 | 1007.86 | 15.19559 | 3 R.CWNRRRA Splice@chr  | 1.73E-11 | 9.75E-04 |
| 22Feb2011 | 23526 | 795.65  | -15.5001 | 4 K.SGTIFDNI Splice@chr | 4.13E-15 | 0        |
| 22Feb2011 | 4850  | 433.76  | 2.609238 | 2 _IVDLP GPI chr3@1104  | 1.69E-10 | 0.004439 |
| 22Feb2011 | 21726 | 957.5   | 22.57714 | 3 K.LFQVLQN Splice@chr  | 1.14E-10 | 0.003448 |
| 22Feb2011 | 22219 | 634.84  | 6.410455 | 2 R.VDIGDILF Splice@chr | 2.86E-12 | 1.28E-04 |
| 22Feb2011 | 11357 | 897.42  | -27.6753 | 3 _QVREMH Splice@chr    | 2.13E-10 | 0.005072 |
| 22Feb2011 | 16949 | 792.42  | 5.26594  | 4 R.TTGVVLD chr2@1512   | 4.29E-10 | 0.009796 |
| 22Feb2011 | 3231  | 735.33  | -27.5112 | 2 K.YGHANVI chr1@1065   | 3.61E-10 | 0.008903 |
| 22Feb2011 | 16238 | 490.74  | -7.60235 | 2 K.DITMEIM chr3@1481   | 2.77E-10 | 0.006898 |
| 22Feb2011 | 20563 | 1007.86 | 15.19559 | 3 R.CWNRRRA Splice@chr  | 3.35E-11 | 0.001136 |
| 22Feb2011 | 25868 | 770.43  | -18.4033 | 3 K.YLDAKCK chr4@3751   | 1.54E-10 | 0.00428  |
| 22Feb2011 | 18825 | 1059.81 | -20.7519 | 3 I.SRSAAMF Splice@chr  | 2.12E-15 | 0        |
| 22Feb2011 | 20790 | 1003.18 | 7.145987 | 3 R.CWNRRRA Splice@chr  | 6.26E-11 | 0.001567 |
| 22Feb2011 | 18776 | 1060.15 | -15.5056 | 3 I.SRSAAMF Splice@chr  | 6.91E-16 | 0        |
| 22Feb2011 | 16770 | 1056.56 | 28.0642  | 3 I.SRVEDDS( Splice@chr | 1.12E-13 | 0        |
| 22Feb2011 | 22275 | 634.84  | 6.410455 | 2 R.VDIGDILF Splice@chr | 7.60E-13 | 0        |
| 22Feb2011 | 6228  | 571.36  | 10.76628 | 2 R.KRKQGAi chr1@1385   | 1.81E-10 | 0.004775 |
| 22Feb2011 | 22746 | 980.48  | -7.04314 | 3 K.SGTIFDNI Splice@chr | 2.33E-10 | 0.005928 |
| 22Feb2011 | 21465 | 897.46  | 8.122101 | 4 R.FWFFGKI chr2@7020   | 1.53E-10 | 0.00428  |
| 22Feb2011 | 3264  | 460.72  | 10.9535  | 2 R.MGMDPI Splice@chr   | 2.91E-10 | 0.007209 |
| 22Feb2011 | 7496  | 533.82  | 16.26677 | 2 K.TNIYTILTI chr5@1325 | 3.66E-10 | 0.009134 |
| 22Feb2011 | 16067 | 622.33  | 9.587405 | 2 R.AK+14.01 chr2@4270  | 1.98E-10 | 0.005014 |
| 22Feb2011 | 25238 | 1062.61 | 3.365979 | 2 E.EYFFRNL5 chrX@1001  | 3.31E-10 | 0.008432 |
| 22Feb2011 | 21786 | 934.48  | 16.93502 | 2 R.QFRQSGI chr5@4795   | 3.61E-10 | 0.008903 |
| 22Feb2011 | 13535 | 859.13  | -8.70361 | 3 _LRFKDNC chrX@1053    | 1.95E-10 | 0.005014 |
| 22Feb2011 | 17273 | 902.54  | -28.5309 | 1 R.PFGVVVK chr2@1360   | 1.64E-10 | 0.004439 |
| 22Feb2011 | 20582 | 1003.19 | 17.13413 | 3 R.CWNRRRA Splice@chr  | 2.23E-12 | 1.28E-04 |
| 22Feb2011 | 20632 | 864.45  | 24.03456 | 2 R.KSSTLMR chr4@1655   | 2.63E-10 | 0.00649  |
| 22Feb2011 | 25661 | 1147.24 | 4.705638 | 3 R.FQSAAIG Splice@chr  | 2.31E-13 | 0        |
| 22Feb2011 | 8325  | 1025.61 | -11.6755 | 1 K.LGLGSGI chr5@4945   | 5.58E-11 | 0.001474 |
| 22Feb2011 | 26147 | 1147.24 | 4.705638 | 3 R.FQSAAIG Splice@chr  | 4.51E-13 | 0        |
| 22Feb2011 | 12265 | 705.36  | 3.466185 | 3 R.TFSKNFTi chr4@1383  | 4.23E-10 | 0.009796 |
| 22Feb2011 | 12718 | 851.49  | -3.4814  | 2 K.RGVRLSH chr2@2785   | 2.59E-10 | 0.00641  |
| 22Feb2011 | 15391 | 858.48  | 6.006088 | 3 _LETGIIPi Splice@chr  | 5.02E-12 | 3.44E-04 |
| 22Feb2011 | 5836  | 787.43  | -1.78505 | 1 K.SDAAPAK chrX@8018   | 1.05E-10 | 0.003007 |
| 22Feb2011 | 18754 | 708.38  | -25.9997 | 3 K.DNLK+14 chr1@7853   | 2.13E-10 | 0.005072 |
| 22Feb2011 | 7760  | 493.78  | -11.3951 | 2 R.KNQENLI Splice@chr  | 2.16E-10 | 0.005072 |
| 22Feb2011 | 17163 | 888.97  | 20.94366 | 2 K.DITLEVEA Splice@chr | 1.77E-12 | 0        |
| 22Feb2011 | 21048 | 694.87  | 2.550973 | 2 K.YHNITLQ chrX@3836   | 3.84E-10 | 0.009336 |
| 22Feb2011 | 21360 | 897.46  | 8.122101 | 4 R.FWFFGKI chr2@7020   | 1.26E-11 | 6.69E-04 |
| 22Feb2011 | 15638 | 938.46  | 22.50833 | 2 R.ECSQSDS chr2@8876   | 3.81E-10 | 0.009284 |

|           |       |         |          |                         |          |          |
|-----------|-------|---------|----------|-------------------------|----------|----------|
| 22Feb2011 | 9429  | 975.55  | -13.0268 | 1 K.LPKLDAYI chr4@1149  | 1.73E-10 | 0.004517 |
| 22Feb2011 | 20683 | 864.44  | 12.44142 | 2 R.KSSTLMR chr4@1659   | 3.62E-10 | 0.008987 |
| 22Feb2011 | 24983 | 968.51  | -23.6218 | 3 R.FFYNIFAL chrX@4721  | 8.55E-11 | 0.002201 |
| 22Feb2011 | 21446 | 1003.18 | 7.145987 | 3 R.CWNRRRA Splice@chr  | 6.97E-12 | 3.44E-04 |
| 22Feb2011 | 25250 | 860.68  | 2.433027 | 4 R.FQSAAIG Splice@chr  | 8.05E-15 | 0        |
| 22Feb2011 | 25258 | 688.75  | 8.895763 | 5 R.FQSAAIG Splice@chr  | 4.46E-11 | 0.001399 |
| 22Feb2011 | 8220  | 1025.61 | -11.6755 | 1 K.LGLGSGL chr5@4949   | 5.30E-12 | 3.44E-04 |
| 22Feb2011 | 14648 | 484.27  | -10.2722 | 3 K.ISSAIAMf chr4@7544  | 2.74E-11 | 0.001136 |
| 22Feb2011 | 7911  | 1089.65 | -29.1532 | 1 K.KLKSMKN chr5@3701   | 8.15E-11 | 0.002442 |
| 22Feb2011 | 23870 | 1147.24 | 4.705638 | 3 R.FQSAAIG Splice@chr  | 1.04E-14 | 0        |
| 22Feb2011 | 24415 | 770.76  | -24.193  | 3 K.YLDAK+1 chr4@3751   | 4.27E-10 | 0.00806  |
| 22Feb2011 | 3512  | 735.33  | -27.5112 | 2 K.YGHANVI chr1@1069   | 4.81E-10 | 0.008763 |
| 22Feb2011 | 14596 | 858.48  | 6.006088 | 3 _LETGIKPI Splice@chr  | 4.34E-13 | 1.29E-04 |
| 22Feb2011 | 5706  | 446.75  | 3.354779 | 2 R.IFSAGELF chr3@5608  | 1.90E-10 | 0.004389 |
| 22Feb2011 | 14142 | 655.34  | 18.15857 | 2 K.FFLAQN chr4@1746    | 3.47E-10 | 0.006852 |
| 22Feb2011 | 21039 | 634.84  | 6.410455 | 2 R.VDIGDILF Splice@chr | 5.66E-13 | 1.29E-04 |
| 22Feb2011 | 14658 | 762.43  | 16.40509 | 2 _MK+14.0 chr4@7749    | 4.81E-10 | 0.008763 |
| 22Feb2011 | 11175 | 521.95  | 5.936294 | 3 _AIFEQM+ chrX@4380    | 1.98E-10 | 0.004389 |
| 22Feb2011 | 23792 | 1147.24 | 4.705638 | 3 R.FQSAAIG Splice@chr  | 1.81E-15 | 0        |
| 22Feb2011 | 7421  | 493.78  | -11.3951 | 2 R.KNQENLL Splice@chr  | 5.07E-10 | 0.009244 |
| 22Feb2011 | 14539 | 858.47  | -5.67211 | 3 _LETGIKPI Splice@chr  | 1.18E-13 | 0        |
| 22Feb2011 | 15613 | 965.76  | 6.091444 | 4 R.KTSSCQK chr5@2089   | 2.80E-10 | 0.005428 |
| 22Feb2011 | 25457 | 770.13  | -20.1423 | 4 _MSLIREK- chr3@1239   | 2.45E-10 | 0.004933 |
| 22Feb2011 | 20214 | 1007.85 | 5.172966 | 3 R.CWNRRRA Splice@chr  | 4.30E-11 | 0.001736 |
| 22Feb2011 | 14863 | 938.46  | 22.50833 | 2 R.ECSQSDS chr2@8876   | 1.51E-10 | 0.003634 |
| 22Feb2011 | 6784  | 693.87  | -6.6949  | 2 V.ICVAVGD chr5@1069   | 8.12E-11 | 0.002442 |
| 22Feb2011 | 6251  | 493.28  | 9.299081 | 2 R.EPKNATC chr2@1056   | 2.79E-10 | 0.005428 |
| 22Feb2011 | 14486 | 858.48  | 6.006088 | 3 _LETGIKPI Splice@chr  | 1.37E-12 | 1.29E-04 |
| 22Feb2011 | 18120 | 895     | -10.9918 | 2 K.M+15.99 chrX@1449   | 4.91E-10 | 0.008922 |
| 22Feb2011 | 25554 | 760.4   | -4.0463  | 3 _TQTNTKI' chrX@7978   | 3.60E-10 | 0.007098 |
| 22Feb2011 | 15256 | 622.33  | 9.587405 | 2 R.AK+14.01 chr2@4270  | 1.19E-10 | 0.00275  |
| 22Feb2011 | 13932 | 484.61  | 1.222351 | 3 K.ISSAIAMf chr4@7544  | 3.86E-11 | 0.001543 |
| 22Feb2011 | 16117 | 792.42  | 5.26594  | 4 R.TTGVVLD chr2@1512   | 3.63E-11 | 0.001345 |
| 22Feb2011 | 22021 | 968.13  | 18.26018 | 3 _GCSIVPIS Splice@chr  | 4.43E-12 | 2.39E-04 |
| 22Feb2011 | 3402  | 735.33  | -27.5112 | 2 K.YGHANVI chr1@1069   | 4.98E-10 | 0.009085 |
| 22Feb2011 | 3407  | 460.72  | 10.9535  | 2 R.MGMDPI Splice@chr   | 6.05E-11 | 0.001982 |
| 22Feb2011 | 7961  | 1089.65 | -29.1532 | 1 K.KLKSMKN chr5@3701   | 2.24E-10 | 0.004619 |
| 22Feb2011 | 21900 | 795.65  | -23.4135 | 4 K.SGTIFDNI Splice@chr | 2.05E-15 | 0        |
| 22Feb2011 | 21887 | 984.81  | -24.8852 | 3 K.SGTIFDNI Splice@chr | 2.42E-10 | 0.004933 |
| 22Feb2011 | 15208 | 679.02  | 15.8828  | 3 K.M+15.99 Splice@chr  | 4.53E-10 | 0.008521 |
| 22Feb2011 | 20989 | 634.84  | 6.410455 | 2 R.VDIGDILF Splice@chr | 6.01E-13 | 1.29E-04 |
| 22Feb2011 | 19612 | 762.13  | -4.55161 | 4 K.SGDAGIV Splice@chr  | 5.36E-10 | 0.009556 |
| 22Feb2011 | 540   | 452.26  | -4.66636 | 2 R.VLHNAPF chr2@1406   | 3.47E-10 | 0.006852 |
| 22Feb2011 | 20302 | 897.46  | 8.122101 | 4 R.FWFFGKI chr2@7020   | 3.00E-10 | 0.005852 |
| 22Feb2011 | 5348  | 741.38  | -23.1647 | 2 K.FPENRHI, chr2@1477  | 2.53E-10 | 0.004933 |
| 22Feb2011 | 23190 | 959.51  | 6.028186 | 3 K.GICDSLKI chrX@1654  | 4.10E-10 | 0.007817 |
| 22Feb2011 | 22290 | 795.65  | -15.5001 | 4 K.SGTIFDNI Splice@chr | 9.28E-15 | 0        |

|           |       |         |          |                         |          |          |
|-----------|-------|---------|----------|-------------------------|----------|----------|
| 22Feb2011 | 19935 | 694.87  | 2.550973 | 2 K.YHNITLQ chrX@3836   | 4.91E-10 | 0.008922 |
| 22Feb2011 | 20219 | 1003.18 | 7.145987 | 3 R.CWNRRRA Splice@chr  | 1.38E-11 | 4.42E-04 |
| 22Feb2011 | 1794  | 833.4   | -14.0782 | 1 _.RDEAQSk Splice@chr  | 4.71E-10 | 0.008521 |
| 22Feb2011 | 23833 | 1147.24 | 4.705638 | 3 R.FQSAAIG Splice@chr  | 9.37E-17 | 0        |
| 22Feb2011 | 14810 | 938.46  | 22.50833 | 2 R.ECSQSDS chr2@8876   | 7.28E-11 | 0.002355 |
| 22Feb2011 | 12748 | 554.26  | 6.682444 | 2 R.M+15.99 Splice@chr  | 4.50E-10 | 0.008521 |
| 22Feb2011 | 20492 | 957.5   | 22.57714 | 3 K.LFQVLQN Splice@chr  | 1.69E-10 | 0.003791 |
| 22Feb2011 | 21721 | 792.15  | -18.5783 | 4 K.SGTIFDNI Splice@chr | 2.73E-17 | 0        |
| 22Feb2011 | 1835  | 833.4   | -14.0782 | 1 _.RDEAQSk Splice@chr  | 4.76E-10 | 0.008604 |
| 22Feb2011 | 8900  | 724.35  | 19.12636 | 3 V.CLTEEGK Splice@chr  | 6.28E-11 | 0.001982 |
| 22Feb2011 | 23025 | 795.65  | -15.5001 | 4 K.SGTIFDNI Splice@chr | 2.36E-13 | 0        |
| 22Feb2011 | 21949 | 795.65  | -15.5001 | 4 K.SGTIFDNI Splice@chr | 9.65E-16 | 0        |
| 22Feb2011 | 22955 | 606.63  | -14.6199 | 3 K.KCNEEGC chr3@1174   | 1.59E-10 | 0.003714 |
| 22Feb2011 | 3466  | 460.72  | 10.9535  | 2 R.MGMDPI Splice@chr   | 1.99E-10 | 0.004543 |
| 22Feb2011 | 14715 | 762.43  | 16.40509 | 2 _.MK+14.0 chr4@7749   | 1.77E-10 | 0.00396  |
| 22Feb2011 | 19245 | 798.15  | -11.5616 | 4 K.SGDAGIV Splice@chr  | 2.42E-10 | 0.004933 |
| 22Feb2011 | 5982  | 626.8   | -12.4435 | 2 R.LCESGAA Splice@chr  | 1.30E-15 | 0        |
| 22Feb2011 | 23847 | 860.68  | 2.433027 | 4 R.FQSAAIG Splice@chr  | 1.33E-14 | 0        |
| 22Feb2011 | 23590 | 968.17  | -29.3651 | 3 R.FFYNIFAL chrX@4722  | 1.33E-10 | 0.003196 |
| 22Feb2011 | 22467 | 799.16  | -7.85909 | 4 K.SGTIFDNI Splice@chr | 9.68E-11 | 0.002582 |
| 22Feb2011 | 23146 | 799.15  | -20.3276 | 4 K.SGTIFDNI Splice@chr | 7.72E-12 | 4.42E-04 |
| 22Feb2011 | 21716 | 795.65  | -23.4135 | 4 K.SGTIFDNI Splice@chr | 1.62E-13 | 0        |
| 22Feb2011 | 20603 | 1008.18 | 0.829193 | 3 R.CWNRRRA Splice@chr  | 3.82E-11 | 0.001543 |
| 22Feb2011 | 17864 | 1060.15 | -15.5056 | 3 I.SRSAAMF Splice@chr  | 1.30E-18 | 0        |
| 22Feb2011 | 15392 | 490.74  | -7.60235 | 2 K.DITMEIM chr3@1481   | 2.13E-10 | 0.004543 |
| 22Feb2011 | 24220 | 1147.24 | 4.705638 | 3 R.FQSAAIG Splice@chr  | 2.28E-14 | 0        |
| 22Feb2011 | 4876  | 433.76  | 2.609238 | 2 _.IVDLPGPI chr3@1104  | 4.08E-10 | 0.007817 |
| 22Feb2011 | 20325 | 1008.18 | 0.829193 | 3 R.CWNRRRA Splice@chr  | 1.22E-10 | 0.00275  |
| 22Feb2011 | 8955  | 724.35  | 19.12636 | 3 V.CLTEEGK Splice@chr  | 5.25E-10 | 0.009556 |
| 22Feb2011 | 22784 | 980.48  | -7.04314 | 3 K.SGTIFDNI Splice@chr | 9.43E-12 | 4.42E-04 |
| 22Feb2011 | 22928 | 795.65  | -15.5001 | 4 K.SGTIFDNI Splice@chr | 3.50E-14 | 0        |
| 22Feb2011 | 23135 | 929.15  | -28.8338 | 3 R.KSTAKLK' chr2@8595  | 1.18E-10 | 0.00275  |
| 22Feb2011 | 13830 | 623.03  | -18.2266 | 3 P.RNWGKG chrX@1446    | 1.47E-10 | 0.003634 |
| 22Feb2011 | 22976 | 984.81  | -24.8852 | 3 K.SGTIFDNI Splice@chr | 5.54E-11 | 0.001907 |
| 22Feb2011 | 22975 | 795.65  | -15.5001 | 4 K.SGTIFDNI Splice@chr | 1.16E-15 | 0        |
| 22Feb2011 | 24701 | 1147.24 | 4.705638 | 3 R.FQSAAIG Splice@chr  | 2.43E-14 | 0        |
| 22Feb2011 | 12090 | 851.49  | -3.4814  | 2 K.RGVRLSH chr2@2785   | 2.09E-10 | 0.004543 |
| 22Feb2011 | 1760  | 632.78  | -25.4076 | 2 _.KM+15.9 Splice@chr  | 3.48E-10 | 0.006852 |
| 22Feb2011 | 15690 | 759.4   | -15.0495 | 2 K.FIDANLQ chr4@8206   | 4.40E-10 | 0.008387 |
| 22Feb2011 | 20952 | 634.84  | 6.410455 | 2 R.VDIGDILF Splice@chr | 4.86E-13 | 1.29E-04 |
| 22Feb2011 | 23641 | 968.17  | -29.3651 | 3 R.FFYNIFAL chrX@4722  | 3.72E-10 | 0.007165 |
| 22Feb2011 | 23398 | 984.81  | -24.8852 | 3 K.SGTIFDNI Splice@chr | 6.99E-11 | 0.002355 |
| 22Feb2011 | 15740 | 759.4   | -15.0495 | 2 K.FIDANLQ chr4@8206   | 1.36E-10 | 0.003196 |
| 22Feb2011 | 20171 | 897.45  | -3.04709 | 4 R.FWFFGKI chr2@7020   | 1.71E-10 | 0.003791 |
| 22Feb2011 | 21899 | 1060.54 | -6.74128 | 3 K.SGTIFDNI Splice@chr | 7.37E-13 | 1.29E-04 |
| 22Feb2011 | 20262 | 897.46  | 8.122101 | 4 R.FWFFGKI chr2@7020   | 2.80E-10 | 0.005428 |
| 22Feb2011 | 20267 | 1003.18 | 7.145987 | 3 R.CWNRRRA Splice@chr  | 3.83E-13 | 1.29E-04 |

|           |       |         |          |                          |          |          |
|-----------|-------|---------|----------|--------------------------|----------|----------|
| 22Feb2011 | 19511 | 1007.86 | 15.19559 | 3 R.CWNRRA Splice@chr    | 7.34E-12 | 4.42E-04 |
| 22Feb2011 | 1751  | 833.4   | -14.0782 | 1 _RDEAQSk Splice@chr    | 5.32E-10 | 0.009556 |
| 22Feb2011 | 17112 | 667.34  | -28.9884 | 3 _FFM+15.! chr3@141!    | 2.23E-10 | 0.004214 |
| 22Feb2011 | 14753 | 938.46  | 22.50833 | 2 R.ECSQSDS chr2@887!    | 2.42E-10 | 0.004475 |
| 22Feb2011 | 4665  | 741.38  | -23.1647 | 2 K.FPENRHI, chr2@147!   | 2.84E-10 | 0.005602 |
| 22Feb2011 | 21252 | 634.83  | -9.39461 | 2 R.VDIGDILF Splice@chr  | 1.26E-12 | 0        |
| 22Feb2011 | 23625 | 984.81  | -24.8852 | 3 K.SGTIFDNI Splice@chr  | 1.46E-10 | 0.003213 |
| 22Feb2011 | 23975 | 1147.24 | 4.705638 | 3 R.FQSAAIG Splice@chr   | 5.18E-15 | 0        |
| 22Feb2011 | 24898 | 760.4   | -4.0463  | 3 _TQTNTKI' chrX@797!    | 4.56E-10 | 0.009095 |
| 22Feb2011 | 20702 | 957.83  | -2.70061 | 3 R.FIEPIEDIF Splice@chr | 4.93E-10 | 0.009964 |
| 22Feb2011 | 19308 | 798.15  | -11.5616 | 4 K.SGDAGIV Splice@chr   | 2.09E-10 | 0.004136 |
| 22Feb2011 | 14808 | 938.46  | 22.50833 | 2 R.ECSQSDS chr2@887!    | 6.56E-11 | 0.001545 |
| 22Feb2011 | 15235 | 622.33  | 9.587405 | 2 R.AK+14.0! chr2@427!   | 7.90E-11 | 0.001847 |
| 22Feb2011 | 4971  | 446.75  | 3.354779 | 2 R.IFSAGELF chr3@560!   | 1.87E-10 | 0.003765 |
| 22Feb2011 | 23258 | 795.65  | -23.4135 | 4 K.SGTIFDNI Splice@chr  | 4.74E-14 | 0        |
| 22Feb2011 | 14538 | 858.47  | -5.67211 | 3 _LETGIKPI Splice@chr   | 1.28E-14 | 0        |
| 22Feb2011 | 2900  | 661.36  | 7.817807 | 2 K.QKFEICE! chr1@300!   | 1.89E-10 | 0.003765 |
| 22Feb2011 | 22239 | 795.65  | -15.5001 | 4 K.SGTIFDNI Splice@chr  | 2.32E-15 | 0        |
| 22Feb2011 | 6437  | 434.24  | 13.9946  | 3 _RSNDQTI chr5@637!     | 4.04E-10 | 0.008313 |
| 22Feb2011 | 13798 | 484.27  | -10.2722 | 3 K.ISSAIAMf chr4@754!   | 7.94E-12 | 0        |
| 22Feb2011 | 6379  | 434.24  | 13.9946  | 3 _RSNDQTI chr5@637!     | 2.43E-10 | 0.004475 |
| 22Feb2011 | 14020 | 607     | -9.70672 | 3 I.NRFNISK chrX@125!    | 4.85E-11 | 0.001351 |
| 22Feb2011 | 17809 | 1059.81 | -20.7519 | 3 I.SRSAAMF Splice@chr   | 1.19E-17 | 0        |
| 22Feb2011 | 20477 | 897.46  | 8.122101 | 4 R.FWFFGKf chr2@702!    | 9.71E-11 | 0.002343 |
| 22Feb2011 | 18708 | 1043.5  | 8.382467 | 1 R.SLGLYSD! chr5@446!   | 5.72E-11 | 0.001455 |
| 22Feb2011 | 22289 | 1060.53 | -16.1915 | 3 K.SGTIFDNI Splice@chr  | 6.68E-13 | 0        |
| 22Feb2011 | 5276  | 626.8   | -12.4435 | 2 R.LCESGAA Splice@chr   | 2.01E-14 | 0        |
| 22Feb2011 | 14427 | 858.47  | -5.67211 | 3 _LETGIKPI Splice@chr   | 4.46E-11 | 0.001351 |
| 22Feb2011 | 13739 | 484.27  | -10.2722 | 3 K.ISSAIAMf chr4@754!   | 4.42E-11 | 0.001351 |
| 22Feb2011 | 24354 | 1147.24 | 4.705638 | 3 R.FQSAAIG Splice@chr   | 2.76E-14 | 0        |
| 22Feb2011 | 5387  | 626.3   | -9.76097 | 2 R.LCESGAA Splice@chr   | 1.58E-15 | 0        |
| 22Feb2011 | 15782 | 888.47  | 22.8338  | 2 K.DITLEVE! Splice@chr  | 3.86E-16 | 0        |
| 22Feb2011 | 20762 | 973.46  | 16.48633 | 3 _GCSIVPIS Splice@chr   | 1.64E-11 | 4.99E-04 |
| 22Feb2011 | 22184 | 795.65  | -15.5001 | 4 K.SGTIFDNI Splice@chr  | 7.34E-14 | 0        |
| 22Feb2011 | 22180 | 1060.53 | -16.1915 | 3 K.SGTIFDNI Splice@chr  | 1.36E-15 | 0        |
| 22Feb2011 | 11736 | 608.84  | 15.16282 | 2 R.KTEEKLE! chr2@394!   | 2.20E-10 | 0.004214 |
| 22Feb2011 | 24017 | 1147.24 | 4.705638 | 3 R.FQSAAIG Splice@chr   | 8.38E-17 | 0        |
| 22Feb2011 | 19291 | 987.51  | 4.289691 | 3 K.KYLFLDNI chr4@128!   | 3.09E-11 | 0.001158 |
| 22Feb2011 | 4609  | 741.38  | -23.1647 | 2 K.FPENRHI, chr2@147!   | 3.61E-10 | 0.007121 |
| 22Feb2011 | 3952  | 433.76  | 2.609238 | 2 _IVDLPGPI chr3@110!    | 2.32E-10 | 0.004405 |
| 22Feb2011 | 24626 | 828.38  | -20.1128 | 2 K.PNLK+14 chr2@386!    | 1.27E-11 | 2.51E-04 |
| 22Feb2011 | 20558 | 1007.85 | 5.172966 | 3 R.CWNRRA Splice@chr    | 2.03E-11 | 7.29E-04 |
| 22Feb2011 | 6873  | 493.78  | -11.3951 | 2 R.KNQENLI Splice@chr   | 3.06E-10 | 0.006159 |
| 22Feb2011 | 22135 | 795.65  | -15.5001 | 4 K.SGTIFDNI Splice@chr  | 7.44E-14 | 0        |
| 22Feb2011 | 22129 | 984.81  | -24.8852 | 3 K.SGTIFDNI Splice@chr  | 1.47E-10 | 0.003213 |
| 22Feb2011 | 15639 | 965.76  | 6.091444 | 4 R.KTSSCQK chr5@208!    | 3.30E-10 | 0.006604 |
| 22Feb2011 | 12456 | 544.8   | -6.50987 | 2 R.LPTYVPA chrX@124!    | 2.03E-10 | 0.004136 |

|           |       |         |          |                          |          |          |
|-----------|-------|---------|----------|--------------------------|----------|----------|
| 22Feb2011 | 19969 | 887.1   | 9.027743 | 3 F.YEEMDYI' Splice@chr  | 5.34E-11 | 0.001351 |
| 22Feb2011 | 19656 | 762.13  | -4.55161 | 4 K.SGDAGIV Splice@chr   | 2.98E-10 | 0.005975 |
| 22Feb2011 | 23431 | 929.15  | -28.8338 | 3 R.KSTAKLK' chr2@8595   | 2.89E-10 | 0.005691 |
| 22Feb2011 | 22746 | 799.15  | -20.3276 | 4 K.SGTIFDNI Splice@chr  | 1.08E-13 | 0        |
| 22Feb2011 | 8735  | 431.74  | 5.455516 | 2 _PIQDVYK Splice@chr    | 2.95E-10 | 0.005784 |
| 22Feb2011 | 9667  | 509.3   | -20.473  | 2 R.SSVIMLIV chr2@5767   | 5.99E-11 | 0.001545 |
| 22Feb2011 | 14479 | 858.47  | -5.67211 | 3 _LETGIKPI Splice@chr   | 2.55E-13 | 0        |
| 22Feb2011 | 21319 | 767.74  | -27.8985 | 3 K.TFLKNPK' chr3@1045   | 2.04E-10 | 0.004136 |
| 22Feb2011 | 5327  | 626.8   | -12.4435 | 2 R.LCESGAA Splice@chr   | 2.71E-16 | 0        |
| 22Feb2011 | 22439 | 984.81  | -24.8852 | 3 K.SGTIFDNI Splice@chr  | 5.87E-13 | 0        |
| 22Feb2011 | 11803 | 851.48  | -15.2578 | 2 K.RGVRLSH chr2@2785    | 2.30E-10 | 0.004405 |
| 22Feb2011 | 9696  | 616.33  | -16.7632 | 2 K.LSKSVIFQ chr3@2798   | 2.32E-10 | 0.004405 |
| 22Feb2011 | 12481 | 554.26  | 6.682444 | 2 R.M+15.99 Splice@chr   | 2.61E-10 | 0.004847 |
| 22Feb2011 | 17858 | 1059.81 | -20.7519 | 3 I.SRSAAMF Splice@chr   | 1.39E-15 | 0        |
| 22Feb2011 | 19285 | 1063.86 | -15.3899 | 3 K.SGDAGIV Splice@chr   | 4.79E-10 | 0.009808 |
| 22Feb2011 | 8489  | 423.26  | -10.1904 | 2 R.STVAAKIF chr3@3295   | 7.21E-11 | 0.001747 |
| 22Feb2011 | 2155  | 587.3   | 4.892896 | 2 Q.NAVEQE' Splice@chr   | 6.83E-12 | 0        |
| 22Feb2011 | 2316  | 735.33  | -27.5112 | 2 K.YGHANVI chr1@1065    | 4.50E-10 | 0.009005 |
| 22Feb2011 | 15946 | 1056.22 | 29.33653 | 3 R.TTGVVLD Splice@chr   | 3.95E-13 | 0        |
| 22Feb2011 | 15748 | 1056.56 | 28.0642  | 3 I.SRVEDDS' Splice@chr  | 2.04E-12 | 0        |
| 22Feb2011 | 8518  | 1086.01 | 9.000639 | 2 V.CLTEEGK Splice@chr   | 2.81E-10 | 0.005602 |
| 22Feb2011 | 21299 | 634.83  | -9.39461 | 2 R.VDIGDILF Splice@chr  | 1.59E-12 | 0        |
| 22Feb2011 | 20441 | 1003.18 | 7.145987 | 3 R.CWNRRA Splice@chr    | 3.21E-14 | 0        |
| 22Feb2011 | 13880 | 887.93  | 29.43791 | 2 I.DEREESTA Splice@chr  | 8.68E-11 | 0.001945 |
| 22Feb2011 | 23995 | 860.68  | 2.433027 | 4 R.FQSAAIG Splice@chr   | 3.52E-14 | 0        |
| 22Feb2011 | 24653 | 828.38  | -20.1128 | 2 K.PNLK+14 chr2@3862    | 1.66E-10 | 0.003685 |
| 22Feb2011 | 2259  | 735.33  | -27.5112 | 2 K.YGHANVI chr1@1065    | 1.37E-10 | 0.003019 |
| 22Feb2011 | 19648 | 864.95  | 22.09183 | 2 R.KSSTLMR chr4@1655    | 2.73E-11 | 0.001158 |
| 22Feb2011 | 6746  | 493.78  | -11.3951 | 2 R.KNQENLI Splice@chr   | 2.46E-10 | 0.00561  |
| 22Feb2011 | 578   | 484.73  | -5.6149  | 2 K.FSEKLESE Splice@chr  | 3.28E-10 | 0.007336 |
| 22Feb2011 | 18900 | 672.59  | -4.41756 | 5 R.KVSNVQ' chr5@8812    | 2.50E-10 | 0.00561  |
| 22Feb2011 | 6801  | 493.78  | -11.3951 | 2 R.KNQENLI Splice@chr   | 2.22E-10 | 0.005243 |
| 22Feb2011 | 20244 | 1003.18 | 7.145987 | 3 R.CWNRRA Splice@chr    | 5.32E-11 | 0.001889 |
| 22Feb2011 | 6104  | 693.87  | -6.6949  | 2 V.ICVAVGD chr5@1065    | 2.73E-10 | 0.006412 |
| 22Feb2011 | 14468 | 858.47  | -5.67211 | 3 _LETGIKPI Splice@chr   | 1.31E-12 | 0        |
| 22Feb2011 | 23871 | 1070.58 | 11.90479 | 2 R.KSTENMI chr1@1074    | 4.47E-10 | 0.009858 |
| 22Feb2011 | 23622 | 1147.24 | 4.705638 | 3 R.FQSAAIG Splice@chr   | 9.93E-15 | 0        |
| 22Feb2011 | 21992 | 795.65  | -23.4135 | 4 K.SGTIFDNI Splice@chr  | 4.39E-13 | 0        |
| 22Feb2011 | 22084 | 984.82  | -14.7074 | 3 K.SGTIFDNI Splice@chr  | 6.87E-11 | 0.002207 |
| 22Feb2011 | 21890 | 799.16  | -7.85909 | 4 K.SGTIFDNI Splice@chr  | 7.80E-12 | 2.64E-04 |
| 22Feb2011 | 10469 | 443.24  | -17.2689 | 2 K.PVVIDDA chrX@5274    | 2.18E-10 | 0.00515  |
| 22Feb2011 | 19611 | 873.47  | 13.68595 | 2 R.SIFVDLEP Splice@chr  | 1.13E-10 | 0.003327 |
| 22Feb2011 | 11440 | 943.57  | -3.04345 | 1 K.GSK+14.C chrX@1205   | 3.16E-10 | 0.007246 |
| 22Feb2011 | 19408 | 1003.19 | 17.13413 | 3 R.CWNRRA Splice@chr    | 6.71E-13 | 0        |
| 22Feb2011 | 11385 | 747.76  | -8.61645 | 5 S.HLPRPGH Splice@chr   | 7.24E-11 | 0.002527 |
| 22Feb2011 | 16082 | 888.97  | 20.94366 | 2 K.DITLEVEA' Splice@chr | 1.35E-11 | 2.64E-04 |
| 22Feb2011 | 20266 | 649.9   | -9.68814 | 2 K.LKIITNLEI chr2@6716  | 1.68E-10 | 0.004619 |

|           |       |         |          |                         |          |          |
|-----------|-------|---------|----------|-------------------------|----------|----------|
| 22Feb2011 | 19886 | 582.65  | 15.01592 | 3 R.SIFVDLEP Splice@chr | 3.15E-11 | 9.95E-04 |
| 22Feb2011 | 13037 | 1174.09 | -25.7902 | 2 R.KGFWQV Splice@chr   | 2.64E-10 | 0.006111 |
| 22Feb2011 | 10072 | 595.33  | 16.43181 | 3 R.DECYASK Splice@chr  | 4.65E-11 | 0.001557 |
| 22Feb2011 | 14527 | 858.48  | 6.006088 | 3 _LETGIKPI Splice@chr  | 9.71E-15 | 0        |
| 22Feb2011 | 17124 | 722.45  | -4.95112 | 2 R.RK+14.01 Splice@chr | 1.13E-10 | 0.003327 |
| 22Feb2011 | 21401 | 975.8   | -15.4281 | 3 K.SGTIFDNI Splice@chr | 4.49E-10 | 0.009937 |
| 22Feb2011 | 8595  | 724.34  | 5.400383 | 3 V.CLTEEGK Splice@chr  | 4.81E-12 | 0        |
| 22Feb2011 | 21936 | 795.65  | -15.5001 | 4 K.SGTIFDNI Splice@chr | 9.68E-14 | 0        |
| 22Feb2011 | 14415 | 858.47  | -5.67211 | 3 _LETGIKPI Splice@chr  | 2.70E-13 | 0        |
| 22Feb2011 | 19874 | 1007.86 | 15.19559 | 3 R.CWNRRRA Splice@chr  | 2.48E-11 | 9.95E-04 |
| 22Feb2011 | 22876 | 795.65  | -15.5001 | 4 K.SGTIFDNI Splice@chr | 1.62E-15 | 0        |
| 22Feb2011 | 23584 | 1147.25 | 13.44098 | 3 R.FQSAAIG Splice@chr  | 2.29E-15 | 0        |
| 22Feb2011 | 13744 | 484.61  | 1.222351 | 3 K.ISSAIAMf chr4@754   | 1.69E-11 | 3.90E-04 |
| 22Feb2011 | 4320  | 741.38  | -23.1647 | 2 K.FPENRHI, chr2@147   | 2.59E-10 | 0.00571  |
| 22Feb2011 | 14787 | 938.46  | 22.50833 | 2 R.ECSQSDS chr2@887    | 7.04E-11 | 0.002437 |
| 22Feb2011 | 20909 | 634.84  | 6.410455 | 2 R.VDIGDILF Splice@chr | 1.01E-12 | 0        |
| 22Feb2011 | 21887 | 795.65  | -15.5001 | 4 K.SGTIFDNI Splice@chr | 6.79E-15 | 0        |
| 22Feb2011 | 21628 | 795.65  | -23.4135 | 4 K.SGTIFDNI Splice@chr | 1.76E-16 | 0        |
| 22Feb2011 | 21784 | 795.65  | -23.4135 | 4 K.SGTIFDNI Splice@chr | 6.96E-15 | 0        |
| 22Feb2011 | 13801 | 484.27  | -10.2722 | 3 K.ISSAIAMf chr4@754   | 2.73E-11 | 9.95E-04 |
| 22Feb2011 | 22378 | 799.16  | -7.85909 | 4 K.SGTIFDNI Splice@chr | 2.30E-12 | 0        |
| 22Feb2011 | 4232  | 741.38  | -23.1647 | 2 K.FPENRHI, chr2@147   | 2.28E-10 | 0.00534  |
| 22Feb2011 | 20960 | 634.84  | 6.410455 | 2 R.VDIGDILF Splice@chr | 3.35E-13 | 0        |
| 22Feb2011 | 15193 | 622.33  | 9.587405 | 2 R.AK+14.01 chr2@427   | 1.76E-10 | 0.004684 |
| 22Feb2011 | 23022 | 929.15  | -28.8338 | 3 R.KSTAKLK' chr2@859   | 1.00E-10 | 0.003024 |
| 22Feb2011 | 17843 | 1059.81 | -20.7519 | 3 I.SRSAAMF Splice@chr  | 2.55E-15 | 0        |
| 22Feb2011 | 13951 | 887.93  | 29.43791 | 2 I.DEREESTM Splice@chr | 1.04E-10 | 0.003024 |
| 22Feb2011 | 19415 | 1007.86 | 15.19559 | 3 R.CWNRRRA Splice@chr  | 1.22E-10 | 0.003757 |
| 22Feb2011 | 21738 | 795.65  | -15.5001 | 4 K.SGTIFDNI Splice@chr | 3.28E-13 | 0        |
| 22Feb2011 | 22924 | 795.65  | -23.4135 | 4 K.SGTIFDNI Splice@chr | 1.45E-14 | 0        |
| 22Feb2011 | 25105 | 760.4   | -4.0463  | 3 _TQTNTKI' chrX@797    | 2.88E-10 | 0.006673 |
| 22Feb2011 | 19848 | 887.11  | 20.42052 | 3 F.YEEMDYI' Splice@chr | 4.72E-12 | 0        |
| 22Feb2011 | 20196 | 897.46  | 8.122101 | 4 R.FWFFGKI chr2@702    | 3.64E-10 | 0.007895 |
| 22Feb2011 | 20445 | 957.5   | 22.57714 | 3 K.LFQVLQN Splice@chr  | 6.59E-11 | 0.002207 |
| 22Feb2011 | 9725  | 616.33  | -16.7632 | 2 K.LSKSVIFQ chr3@279   | 4.27E-10 | 0.009095 |
| 22Feb2011 | 22841 | 795.65  | -15.5001 | 4 K.SGTIFDNI Splice@chr | 1.11E-12 | 0        |
| 22Feb2011 | 20876 | 730.92  | -24.8083 | 2 _FFHKVK+ chr5@200     | 3.14E-10 | 0.007246 |
| 22Feb2011 | 9837  | 879.47  | 21.53913 | 1 R.YNRAPM chr5@430     | 3.05E-10 | 0.006868 |
| 22Feb2011 | 23348 | 688.37  | 19.57571 | 3 R.MIFSLDP chrX@605    | 1.12E-10 | 0.003327 |
| 22Feb2011 | 21763 | 984.81  | -24.8852 | 3 K.SGTIFDNI Splice@chr | 6.90E-12 | 0        |
| 22Feb2011 | 1813  | 450.77  | 18.59199 | 2 K.IEVDGVLI chrX@125   | 3.20E-10 | 0.007336 |
| 22Feb2011 | 17784 | 1059.81 | -20.7519 | 3 I.SRSAAMF Splice@chr  | 6.51E-17 | 0        |
| 22Feb2011 | 21838 | 795.65  | -15.5001 | 4 K.SGTIFDNI Splice@chr | 2.57E-14 | 0        |
| 22Feb2011 | 23143 | 1147.25 | 13.44098 | 3 R.FQSAAIG Splice@chr  | 2.36E-12 | 1.57E-04 |
| 22Feb2011 | 8448  | 724.34  | 5.400383 | 3 V.CLTEEGK Splice@chr  | 1.05E-11 | 4.07E-04 |
| 22Feb2011 | 3806  | 403.2   | 4.561063 | 2 K.DDIAASG chr3@110    | 2.02E-10 | 0.005558 |
| 22Feb2011 | 13563 | 484.27  | -10.2722 | 3 K.ISSAIAMf chr4@754   | 1.11E-10 | 0.003605 |

|           |       |         |          |                         |          |          |
|-----------|-------|---------|----------|-------------------------|----------|----------|
| 22Feb2011 | 19731 | 1007.86 | 15.19559 | 3 R.CWNRRA Splice@chr   | 3.54E-11 | 9.88E-04 |
| 22Feb2011 | 7412  | 1025.61 | -11.6755 | 1 K.LGLGSGL chr5@4945   | 8.52E-12 | 4.07E-04 |
| 22Feb2011 | 15526 | 759.4   | -15.0495 | 2 K.FIDANLQ chr4@8206   | 1.09E-10 | 0.003381 |
| 22Feb2011 | 15525 | 965.76  | 6.091444 | 4 R.K+14.016 chr5@2085  | 2.30E-10 | 0.006043 |
| 22Feb2011 | 15935 | 592.98  | 16.54196 | 3 K.DITLEVEA Splice@chr | 2.26E-10 | 0.005945 |
| 22Feb2011 | 14319 | 858.47  | -5.67211 | 3 _LETGIKPI Splice@chr  | 5.90E-15 | 0        |
| 22Feb2011 | 10723 | 747.76  | -8.61645 | 5 S.HLPRPGH Splice@chr  | 1.33E-10 | 0.004425 |
| 22Feb2011 | 7520  | 1025.61 | -11.6755 | 1 K.LGLGSGL chr5@4945   | 2.33E-11 | 7.74E-04 |
| 22Feb2011 | 16568 | 820.39  | -23.8985 | 4 R.TTGVVLD Splice@chr  | 1.56E-10 | 0.004809 |
| 22Feb2011 | 19130 | 1064.2  | -10.2401 | 3 K.SGDAGIV Splice@chr  | 4.44E-11 | 0.001218 |
| 22Feb2011 | 20040 | 1003.18 | 7.145987 | 3 R.CWNRRA Splice@chr   | 1.34E-12 | 1.57E-04 |
| 22Feb2011 | 23430 | 770.76  | -24.193  | 3 K.YLDAKCK chr4@3751   | 1.50E-10 | 0.004611 |
| 22Feb2011 | 9991  | 550.82  | 1.472544 | 4 K.NPSKIQK chr3@2560   | 1.30E-10 | 0.004337 |
| 22Feb2011 | 20280 | 1007.85 | 5.172966 | 3 R.CWNRRA Splice@chr   | 3.59E-10 | 0.009264 |
| 22Feb2011 | 20757 | 634.84  | 6.410455 | 2 R.VDIGDILF Splice@chr | 6.73E-13 | 0        |
| 22Feb2011 | 19750 | 694.87  | 2.550973 | 2 K.YHNITLQ chrX@3836   | 3.99E-10 | 0.009812 |
| 22Feb2011 | 2673  | 411.7   | -22.8862 | 2 K.IYGGGGC chr4@1715   | 2.33E-13 | 0        |
| 22Feb2011 | 6742  | 493.78  | -11.3951 | 2 R.KNQENLI Splice@chr  | 2.79E-10 | 0.007683 |
| 22Feb2011 | 4582  | 741.38  | -23.1647 | 2 K.FPENRHI chr2@1477   | 3.84E-10 | 0.009624 |
| 22Feb2011 | 7504  | 1089.65 | -29.1532 | 1 K.KLKSMKN chr5@3701   | 2.56E-10 | 0.006826 |
| 22Feb2011 | 6368  | 434.24  | 13.9946  | 3 _RSNDQTI chr5@6378    | 1.94E-10 | 0.005558 |
| 22Feb2011 | 20089 | 1003.18 | 7.145987 | 3 R.CWNRRA Splice@chr   | 3.82E-12 | 3.04E-04 |
| 22Feb2011 | 2100  | 574.77  | -16.2754 | 2 K.IMADSIT chr4@4334   | 3.06E-11 | 9.88E-04 |
| 22Feb2011 | 19361 | 1003.19 | 17.13413 | 3 R.CWNRRA Splice@chr   | 8.42E-13 | 0        |
| 22Feb2011 | 19089 | 987.51  | 4.289691 | 3 K.KYLFLDNI chr4@1288  | 2.43E-10 | 0.006332 |
| 22Feb2011 | 20109 | 897.45  | -3.04709 | 4 R.FWFFGKI chr2@7020   | 1.37E-10 | 0.004425 |
| 22Feb2011 | 23170 | 860.69  | 14.08015 | 4 R.FQSAAIG Splice@chr  | 6.76E-13 | 0        |
| 22Feb2011 | 14265 | 858.47  | -5.67211 | 3 _LETGIKPI Splice@chr  | 2.10E-13 | 0        |
| 22Feb2011 | 20061 | 897.46  | 8.122101 | 4 R.FWFFGKI chr2@7020   | 1.36E-10 | 0.004425 |
| 22Feb2011 | 20064 | 1007.85 | 5.172966 | 3 R.CWNRRA Splice@chr   | 2.26E-10 | 0.005945 |
| 22Feb2011 | 22700 | 929.15  | -28.8338 | 3 R.KSTAKLK chr2@8595   | 1.83E-10 | 0.005393 |
| 22Feb2011 | 15045 | 622.33  | 9.587405 | 2 R.AK+14.01 chr2@4270  | 3.95E-10 | 0.009624 |
| 22Feb2011 | 14477 | 762.43  | 16.40509 | 2 _MK+14.0 chr4@7749    | 2.97E-10 | 0.007873 |
| 22Feb2011 | 20799 | 634.84  | 6.410455 | 2 R.VDIGDILF Splice@chr | 4.79E-13 | 0        |
| 22Feb2011 | 13778 | 887.93  | 29.43791 | 2 I.DEREESTI chr5@9925  | 6.11E-11 | 0.002605 |
| 22Feb2011 | 12    | 495.29  | -6.17408 | 2 R.VFIEVNLF chr4@5737  | 1.80E-10 | 0.005393 |
| 22Feb2011 | 20233 | 1007.85 | 5.172966 | 3 R.CWNRRA Splice@chr   | 1.96E-10 | 0.005558 |
| 22Feb2011 | 14990 | 622.33  | 9.587405 | 2 R.AK+14.01 chr2@4270  | 1.88E-10 | 0.005492 |
| 22Feb2011 | 19373 | 1007.86 | 15.19559 | 3 R.CWNRRA Splice@chr   | 9.49E-11 | 0.003279 |
| 22Feb2011 | 23168 | 688.75  | 8.895763 | 5 R.FQSAAIG Splice@chr  | 2.64E-10 | 0.007121 |
| 22Feb2011 | 23161 | 1147.25 | 13.44098 | 3 R.FQSAAIG Splice@chr  | 1.53E-14 | 0        |
| 22Feb2011 | 14381 | 858.48  | 6.006088 | 3 _LETGIKPI Splice@chr  | 5.15E-11 | 0.001806 |
| 22Feb2011 | 15855 | 571.64  | -12.8771 | 3 R.IAEK+14 chr1@2921   | 1.50E-10 | 0.004611 |
| 22Feb2011 | 14634 | 938.46  | 22.50833 | 2 R.ECSQSDS chr2@8876   | 1.74E-10 | 0.005393 |
| 22Feb2011 | 4531  | 741.38  | -23.1647 | 2 K.FPENRHI chr2@1477   | 2.97E-10 | 0.007873 |
| 22Feb2011 | 13619 | 484.27  | -10.2722 | 3 K.ISSAIAMF chr4@7544  | 6.32E-12 | 4.07E-04 |
| 22Feb2011 | 10333 | 897.42  | -27.6753 | 3 _QVREMH Splice@chr    | 4.11E-10 | 0.009987 |

|           |       |         |          |                          |          |          |
|-----------|-------|---------|----------|--------------------------|----------|----------|
| 22Feb2011 | 22972 | 975.8   | -15.4281 | 3 K.SGTIFDNI Splice@chr  | 5.32E-10 | 0.009972 |
| 22Feb2011 | 15029 | 833.93  | -9.2006  | 2 _..IIEPYVAV Splice@chr | 2.35E-10 | 0.0054   |
| 22Feb2011 | 290   | 735.33  | -27.5112 | 2 K.YGHANVI chr1@1065    | 3.78E-10 | 0.007863 |
| 22Feb2011 | 18638 | 742.88  | -6.21424 | 2 K.M+15.99 chr4@1648    | 8.22E-11 | 0.001746 |
| 22Feb2011 | 15233 | 858.47  | -5.67211 | 3 _..LETGIKPI Splice@chr | 1.02E-10 | 0.001962 |
| 22Feb2011 | 21107 | 694.87  | 2.550973 | 2 K.YHNITLQ chrX@3836    | 3.04E-10 | 0.006567 |
| 22Feb2011 | 16179 | 490.74  | -7.60235 | 2 K.DITMEIM chr3@1481    | 4.60E-10 | 0.008922 |
| 22Feb2011 | 11333 | 747.56  | -7.71771 | 5 S.HLPRPGH Splice@chr   | 3.34E-10 | 0.007148 |
| 22Feb2011 | 20664 | 864.94  | 10.49869 | 2 R.KSSTLMR chr4@1655    | 4.56E-12 | 5.52E-04 |
| 22Feb2011 | 3340  | 488.28  | 18.24649 | 2 K.INAEFVG chr4@4519    | 5.21E-10 | 0.009606 |
| 22Feb2011 | 23407 | 1060.53 | -16.1915 | 3 K.SGTIFDNI Splice@chr  | 1.81E-12 | 2.37E-04 |
| 22Feb2011 | 23466 | 795.65  | -15.5001 | 4 K.SGTIFDNI Splice@chr  | 1.24E-14 | 0        |
| 22Feb2011 | 14412 | 1005.16 | -21.3951 | 3 L.LTTCNRRl Splice@chr  | 3.10E-11 | 0.001302 |
| 22Feb2011 | 15645 | 938.46  | 22.50833 | 2 R.ECSQSDS chr2@8876    | 1.55E-10 | 0.003242 |
| 22Feb2011 | 25149 | 984.81  | -24.8852 | 3 K.SGTIFDNI Splice@chr  | 4.28E-11 | 0.001356 |
| 22Feb2011 | 21440 | 649.9   | -9.68814 | 2 K.LKIITNLEI chr2@6716  | 3.24E-10 | 0.007011 |
| 22Feb2011 | 15998 | 622.33  | 9.587405 | 2 R.AK+14.01 chr2@4270   | 1.76E-10 | 0.003956 |
| 22Feb2011 | 5232  | 741.38  | -23.1647 | 2 K.FPENRHL chr2@1475    | 2.16E-10 | 0.004961 |
| 22Feb2011 | 2572  | 574.77  | -16.2754 | 2 K.IMADSIT chr4@4334    | 3.24E-10 | 0.007011 |
| 22Feb2011 | 26236 | 713.68  | -6.48229 | 3 I.YSNTTNSI chr1@2335   | 3.53E-10 | 0.007588 |
| 22Feb2011 | 14264 | 1041.04 | -10.4206 | 2 K.EKKAMRI chr1@3014    | 7.56E-11 | 0.001663 |
| 22Feb2011 | 2745  | 412.23  | 25.3069  | 2 R.IASYQGG chrX@1679    | 4.29E-10 | 0.008787 |
| 22Feb2011 | 15402 | 762.43  | 16.40509 | 2 _..MK+14.0 chr4@7749   | 2.01E-10 | 0.004489 |
| 22Feb2011 | 18831 | 1059.81 | -20.7519 | 3 I.SRSAAMF Splice@chr   | 5.57E-17 | 0        |
| 22Feb2011 | 23100 | 792.15  | -18.5783 | 4 K.SGTIFDNI Splice@chr  | 3.68E-17 | 0        |
| 22Feb2011 | 7110  | 434.24  | 13.9946  | 3 _..RSNDQTI chr5@6378   | 1.86E-10 | 0.004268 |
| 22Feb2011 | 25711 | 1147.24 | 4.705638 | 3 R.FQSAAG Splice@chr    | 2.32E-15 | 0        |
| 22Feb2011 | 23412 | 795.65  | -15.5001 | 4 K.SGTIFDNI Splice@chr  | 4.16E-14 | 0        |
| 22Feb2011 | 3172  | 488.28  | 18.24649 | 2 K.INAEFVG chr4@4519    | 2.68E-10 | 0.005757 |
| 22Feb2011 | 14437 | 623.03  | -18.2266 | 3 P.RNWGKG chrX@1446     | 5.21E-10 | 0.009606 |
| 22Feb2011 | 21942 | 887.42  | -14.0465 | 2 S.FCLLYKGF Splice@chr  | 2.08E-10 | 0.004728 |
| 22Feb2011 | 21947 | 646     | -23.2783 | 3 N.NDSDILF chr1@1264    | 2.15E-10 | 0.004961 |
| 22Feb2011 | 2695  | 412.23  | 25.3069  | 2 R.IASYQGG chrX@1679    | 4.27E-10 | 0.008787 |
| 22Feb2011 | 25341 | 968.51  | -23.6218 | 3 R.FFYNIFAL chrX@4722   | 4.60E-11 | 0.001356 |
| 22Feb2011 | 21657 | 897.45  | -3.04709 | 4 R.FWFFGKI chr2@7020    | 9.36E-11 | 0.001895 |
| 22Feb2011 | 2797  | 412.23  | 25.3069  | 2 R.IASYQGG chrX@1679    | 2.99E-10 | 0.006343 |
| 22Feb2011 | 13265 | 554.26  | 6.682444 | 2 R.M+15.99 Splice@chr   | 4.10E-11 | 0.001356 |
| 22Feb2011 | 15091 | 833.93  | -9.2006  | 2 _..IIEPYVAV Splice@chr | 6.42E-11 | 0.001419 |
| 22Feb2011 | 19659 | 746.9   | 0.654628 | 2 V.EK+14.01 chrX@6709   | 3.91E-10 | 0.00801  |
| 22Feb2011 | 18530 | 991.51  | 24.02083 | 3 _..IYVPADD Splice@chr  | 1.10E-14 | 0        |
| 22Feb2011 | 3536  | 456.29  | -1.0042  | 2 R.RAAAPLR Splice@chr   | 2.18E-10 | 0.005039 |
| 22Feb2011 | 23575 | 795.65  | -23.4135 | 4 K.SGTIFDNI Splice@chr  | 1.47E-13 | 0        |
| 22Feb2011 | 26511 | 828.38  | -20.1128 | 2 K.PNLK+14 chr2@3862    | 7.17E-11 | 0.001663 |
| 22Feb2011 | 21144 | 1007.86 | 15.19559 | 3 R.CWNRRA Splice@chr    | 3.98E-12 | 4.51E-04 |
| 22Feb2011 | 25203 | 984.81  | -24.8852 | 3 K.SGTIFDNI Splice@chr  | 2.53E-13 | 0        |
| 22Feb2011 | 16473 | 1056.56 | 28.0642  | 3 I.SRVEDDS Splice@chr   | 3.08E-15 | 0        |
| 22Feb2011 | 22484 | 805.46  | -26.0992 | 2 K.TPIFIPAP chr5@1861   | 4.35E-11 | 0.001356 |

|           |       |         |          |                         |          |          |
|-----------|-------|---------|----------|-------------------------|----------|----------|
| 22Feb2011 | 7336  | 533.82  | 16.26677 | 2 K.TNIYTILTI chr5@1329 | 1.63E-10 | 0.003397 |
| 22Feb2011 | 12565 | 730.38  | -23.8587 | 3 K.DNVVNTI chr3@7829   | 1.02E-10 | 0.001962 |
| 22Feb2011 | 5693  | 446.75  | 3.354779 | 2 R.IFSAGELF chr3@5608  | 4.12E-10 | 0.008444 |
| 22Feb2011 | 2159  | 562.83  | -11.5155 | 2 K.RQERGILI chr1@1844  | 1.61E-10 | 0.003316 |
| 22Feb2011 | 14555 | 623.03  | -18.2266 | 3 P.RNWGKC chrX@1446    | 2.37E-10 | 0.0054   |
| 22Feb2011 | 28191 | 439.73  | -4.03447 | 2 R.SIAMFGP chr2@4157   | 2.84E-10 | 0.006205 |
| 22Feb2011 | 23521 | 795.65  | -23.4135 | 4 K.SGTIFDNI Splice@chr | 5.66E-14 | 0        |
| 22Feb2011 | 16761 | 792.42  | 5.26594  | 4 R.TTGVVLD chr2@1512   | 5.10E-10 | 0.009463 |
| 22Feb2011 | 16404 | 759.4   | -15.0495 | 2 K.FIDANLQ chr4@8206   | 2.44E-10 | 0.005524 |
| 22Feb2011 | 20653 | 1003.18 | 7.145987 | 3 R.CWNRRA Splice@chr   | 5.43E-11 | 0.001419 |
| 22Feb2011 | 15346 | 858.47  | -5.67211 | 3 _LETGIKPI Splice@chr  | 6.73E-12 | 6.35E-04 |
| 22Feb2011 | 25381 | 959.84  | 1.380437 | 3 K.GICDLSKI chrX@1654  | 4.08E-10 | 0.008294 |
| 22Feb2011 | 8086  | 1089.65 | -29.1532 | 1 K.KLKSMKN chr5@3701   | 1.22E-10 | 0.002284 |
| 22Feb2011 | 26187 | 713.68  | -6.48229 | 3 I.YSNTTNSI chr1@2339  | 3.60E-11 | 0.001356 |
| 22Feb2011 | 281   | 439.73  | -4.03447 | 2 R.SIAMFGP chr2@4157   | 2.46E-10 | 0.005524 |
| 22Feb2011 | 12636 | 851.48  | -15.2578 | 2 K.RGVRLSH chr2@2789   | 1.25E-10 | 0.002607 |
| 22Feb2011 | 23147 | 795.65  | -15.5001 | 4 K.SGTIFDNI Splice@chr | 2.15E-14 | 0        |
| 22Feb2011 | 21450 | 1003.18 | 7.145987 | 3 R.CWNRRA Splice@chr   | 5.12E-13 | 0        |
| 22Feb2011 | 25965 | 1070.58 | 11.90479 | 2 R.KSTENMI chr1@1074   | 5.20E-10 | 0.009606 |
| 22Feb2011 | 20112 | 1060.14 | -25.0362 | 3 I.SRSAAMF Splice@chr  | 1.43E-13 | 0        |
| 22Feb2011 | 12826 | 833.42  | -4.62234 | 1 K.HEVTVFT chr4@1317   | 1.58E-10 | 0.003316 |
| 22Feb2011 | 28176 | 439.73  | -4.03447 | 2 R.SIAMFGP chr2@4157   | 3.73E-10 | 0.007863 |
| 22Feb2011 | 19086 | 756.05  | -0.97004 | 3 _EM+15.9 chr4@6159    | 3.11E-10 | 0.006867 |
| 22Feb2011 | 25175 | 799.15  | -20.3276 | 4 K.SGTIFDNI Splice@chr | 9.51E-11 | 0.001895 |
| 22Feb2011 | 23896 | 984.81  | -24.8852 | 3 K.SGTIFDNI Splice@chr | 2.49E-10 | 0.005524 |
| 22Feb2011 | 21155 | 694.87  | 2.550973 | 2 K.YHNITLQ chrX@3836   | 3.72E-10 | 0.007863 |
| 22Feb2011 | 9519  | 560.94  | -12.2507 | 3 _EMFSAAI chr4@3419    | 1.17E-10 | 0.002206 |
| 22Feb2011 | 16463 | 759.4   | -15.0495 | 2 K.FIDANLQ chr4@8206   | 2.16E-10 | 0.004961 |
| 22Feb2011 | 23360 | 795.65  | -15.5001 | 4 K.SGTIFDNI Splice@chr | 1.65E-12 | 2.37E-04 |
| 22Feb2011 | 18778 | 1059.81 | -20.7519 | 3 I.SRSAAMF Splice@chr  | 1.02E-18 | 0        |
| 22Feb2011 | 2109  | 562.83  | -11.5155 | 2 K.RQERGILI chr1@1844  | 1.10E-10 | 0.001962 |
| 22Feb2011 | 11022 | 832.46  | -1.02771 | 2 S.KMKV+14 chr5@1963   | 2.86E-10 | 0.005636 |
| 22Feb2011 | 1892  | 587.3   | 4.892896 | 2 Q.NAVEQE Splice@chr   | 8.21E-12 | 5.83E-04 |
| 22Feb2011 | 3151  | 460.72  | 10.9535  | 2 R.MGMDPI Splice@chr   | 1.19E-10 | 0.002147 |
| 22Feb2011 | 25102 | 1146.91 | 18.11004 | 4 _WVRYLV( Splice@chr   | 1.40E-10 | 0.002801 |
| 22Feb2011 | 6346  | 493.28  | 9.299081 | 2 R.EPKNATG chr2@1056   | 2.10E-10 | 0.004121 |
| 22Feb2011 | 11635 | 747.57  | 5.690177 | 5 S.HLPRPGH Splice@chr  | 3.59E-11 | 9.35E-04 |
| 22Feb2011 | 17723 | 835.45  | -7.2977  | 4 R.K+14.016 chrX@9996  | 3.34E-10 | 0.006443 |
| 22Feb2011 | 12711 | 851.49  | -3.4814  | 2 K.RGVRLSH chr2@2789   | 4.19E-10 | 0.00834  |
| 22Feb2011 | 5257  | 741.38  | -23.1647 | 2 K.FPENRHI chr2@1477   | 2.99E-10 | 0.005771 |
| 22Feb2011 | 16614 | 759.4   | -15.0495 | 2 K.FIDANLQ chr4@8206   | 6.35E-11 | 0.001523 |
| 22Feb2011 | 7691  | 527.95  | 11.73747 | 3 K.SVVSISSE chr4@1049  | 3.63E-10 | 0.007426 |
| 22Feb2011 | 21555 | 934.48  | 16.93502 | 2 R.QFRQSGI chr5@4799   | 1.29E-10 | 0.0023   |
| 22Feb2011 | 1930  | 587.3   | 4.892896 | 2 Q.NAVEQE Splice@chr   | 7.40E-12 | 5.83E-04 |
| 22Feb2011 | 15597 | 762.43  | 16.40509 | 2 _MK+14.0 chr4@7749    | 2.22E-10 | 0.004666 |
| 22Feb2011 | 20418 | 1007.86 | 15.19559 | 3 R.CWNRRA Splice@chr   | 3.96E-10 | 0.007856 |
| 22Feb2011 | 14810 | 664.37  | 2.821611 | 3 R.TPLVPTEI chr2@1108  | 1.95E-10 | 0.003968 |

|           |       |         |          |                          |          |          |
|-----------|-------|---------|----------|--------------------------|----------|----------|
| 22Feb2011 | 26145 | 769.88  | -19.0515 | 4 _._MSLIREK- chr3@1235  | 2.28E-10 | 0.004666 |
| 22Feb2011 | 24804 | 968.51  | -23.6218 | 3 R.FFYNIFAL chrX@4722   | 4.13E-10 | 0.008142 |
| 22Feb2011 | 5199  | 741.38  | -23.1647 | 2 K.FPENRHL chr2@1477    | 3.60E-10 | 0.007349 |
| 22Feb2011 | 23938 | 911.42  | 20.49399 | 2 _._PRM+15. Splice@chr  | 3.55E-10 | 0.007197 |
| 22Feb2011 | 19502 | 886.77  | -29.5706 | 3 G.FLFKSLC\ chr2@9496   | 4.76E-10 | 0.008906 |
| 22Feb2011 | 15463 | 858.48  | 6.006088 | 3 _._LETGIKPI Splice@chr | 1.03E-10 | 0.0019   |
| 22Feb2011 | 16343 | 490.74  | -7.60235 | 2 K.DITMEIM chr3@1481    | 2.95E-10 | 0.005771 |
| 22Feb2011 | 24391 | 929.15  | -28.8338 | 3 R.KSTAKLK\ chr2@8595   | 1.07E-11 | 5.83E-04 |
| 22Feb2011 | 10637 | 550.82  | 1.472544 | 4 K.NPSKIQK- chr3@2560   | 2.66E-10 | 0.005257 |
| 22Feb2011 | 16157 | 622.33  | 9.587405 | 2 R.AK+14.01 chr2@4270   | 2.48E-10 | 0.005035 |
| 22Feb2011 | 17012 | 888.47  | 22.8338  | 2 K.DITLEVEA Splice@chr  | 3.18E-12 | 3.41E-04 |
| 22Feb2011 | 14779 | 484.27  | -10.2722 | 3 K.ISSAIAMf chr4@7544   | 1.87E-10 | 0.00374  |
| 22Feb2011 | 22016 | 634.83  | -9.39461 | 2 R.VDIGDILF Splice@chr  | 2.53E-12 | 2.38E-04 |
| 22Feb2011 | 21407 | 957.5   | 22.57714 | 3 K.LFQVLQN Splice@chr   | 1.74E-10 | 0.003591 |
| 22Feb2011 | 18503 | 742.88  | -6.21424 | 2 K.M+15.99 chr4@1648    | 2.87E-10 | 0.005636 |
| 22Feb2011 | 20433 | 873.47  | 13.68595 | 2 R.SIFVDLEP Splice@chr  | 1.27E-11 | 5.83E-04 |
| 22Feb2011 | 25146 | 1147.24 | 4.705638 | 3 R.FQSAAIG Splice@chr   | 1.74E-15 | 0        |
| 22Feb2011 | 3324  | 562.83  | -11.5155 | 2 K.RQERGIL chr1@1844    | 6.12E-11 | 0.001447 |
| 22Feb2011 | 2243  | 735.33  | -27.5112 | 2 K.YGHANVI chr1@1065    | 2.87E-10 | 0.005636 |
| 22Feb2011 | 5733  | 446.75  | 3.354779 | 2 R.IFSAGELF chr3@5608   | 3.48E-10 | 0.00689  |
| 22Feb2011 | 17931 | 722.45  | -4.95112 | 2 R.RK+14.01 Splice@chr  | 2.95E-10 | 0.005771 |
| 22Feb2011 | 10806 | 829.89  | -16.1259 | 2 R.FEVFEIEC chr4@7295   | 3.55E-10 | 0.007197 |
| 22Feb2011 | 15402 | 858.47  | -5.67211 | 3 _._LETGIKPI Splice@chr | 4.97E-12 | 5.83E-04 |
| 22Feb2011 | 22076 | 805.47  | -13.7324 | 2 K.TPIFIPAP\ chr5@1861  | 4.19E-11 | 0.001204 |
| 22Feb2011 | 22072 | 634.84  | 6.410455 | 2 R.VDIGDILF Splice@chr  | 9.43E-13 | 0        |
| 22Feb2011 | 7544  | 493.78  | -11.3951 | 2 R.KNQENLI Splice@chr   | 2.55E-10 | 0.005257 |
| 22Feb2011 | 7198  | 434.24  | 13.9946  | 3 _._RSNDQTI chr5@6378   | 1.68E-10 | 0.003513 |
| 22Feb2011 | 24841 | 962.8   | 19.96909 | 3 _._GCSIVPIS Splice@chr | 3.13E-10 | 0.005917 |
| 22Feb2011 | 16932 | 888.97  | 20.94366 | 2 K.DITLEVEA Splice@chr  | 2.20E-10 | 0.004598 |
| 22Feb2011 | 14578 | 623.03  | -18.2266 | 3 P.RNWGKG chrX@1446     | 3.67E-11 | 9.35E-04 |
| 22Feb2011 | 8109  | 1089.65 | -29.1532 | 1 K.KLKSMKN chr5@3701    | 3.82E-10 | 0.007633 |
| 22Feb2011 | 19933 | 987.51  | 4.289691 | 3 K.KYLFLDNI chr4@1288   | 1.56E-10 | 0.003118 |
| 22Feb2011 | 20428 | 1003.18 | 7.145987 | 3 R.CWNRRA Splice@chr    | 1.61E-11 | 5.83E-04 |
| 22Feb2011 | 1971  | 587.8   | 2.031861 | 2 Q.NAVEQE Splice@chr    | 1.54E-11 | 5.83E-04 |
| 22Feb2011 | 21447 | 957.5   | 22.57714 | 3 K.LFQVLQN Splice@chr   | 1.22E-10 | 0.002226 |
| 22Feb2011 | 15178 | 833.93  | -9.2006  | 2 _._IIEPYVAM Splice@chr | 8.38E-11 | 0.0019   |
| 22Feb2011 | 21974 | 634.84  | 6.410455 | 2 R.VDIGDILF Splice@chr  | 1.40E-12 | 0        |
| 22Feb2011 | 3062  | 412.23  | 25.3069  | 2 R.IASYQGG chrX@1679    | 2.83E-10 | 0.005636 |
| 22Feb2011 | 3203  | 460.72  | 10.9535  | 2 R.MGMDPI Splice@chr    | 3.97E-10 | 0.007575 |
| 22Feb2011 | 23329 | 984.81  | -24.8852 | 3 K.SGTIFDNI Splice@chr  | 1.55E-11 | 4.98E-04 |
| 22Feb2011 | 23330 | 795.65  | -15.5001 | 4 K.SGTIFDNI Splice@chr  | 2.10E-14 | 0        |
| 22Feb2011 | 24485 | 795.65  | -15.5001 | 4 K.SGTIFDNI Splice@chr  | 6.38E-13 | 0        |
| 22Feb2011 | 22398 | 805.46  | -26.0992 | 2 K.TPIFIPAP\ chr5@1861  | 3.56E-10 | 0.006771 |
| 22Feb2011 | 14049 | 924.9   | -24.4218 | 2 Q.KPDDISN Splice@chr   | 1.12E-10 | 0.002341 |
| 22Feb2011 | 23597 | 984.81  | -24.8852 | 3 K.SGTIFDNI Splice@chr  | 2.40E-12 | 0        |
| 22Feb2011 | 20762 | 873.48  | 25.16572 | 2 R.SIFVDLEP Splice@chr  | 1.60E-11 | 4.98E-04 |
| 22Feb2011 | 15359 | 858.47  | -5.67211 | 3 _._LETGIKPI Splice@chr | 2.40E-13 | 0        |

|           |       |         |          |                          |          |          |
|-----------|-------|---------|----------|--------------------------|----------|----------|
| 22Feb2011 | 15168 | 833.93  | -9.2006  | 2 _..IIEPYVAV Splice@chr | 6.46E-11 | 0.001878 |
| 22Feb2011 | 21725 | 957.5   | 22.57714 | 3 K.LFQVLQN Splice@chr   | 5.88E-10 | 0.00997  |
| 22Feb2011 | 16822 | 792.42  | 5.26594  | 4 R.TTGVVLD chr2@1512    | 1.06E-10 | 0.002341 |
| 22Feb2011 | 26270 | 828.38  | -20.1128 | 2 K.PNLK+14 chr2@3862    | 3.69E-10 | 0.006996 |
| 22Feb2011 | 15342 | 599.28  | -28.7398 | 2 K.LCSTADT chrX@1481    | 4.93E-11 | 0.001558 |
| 22Feb2011 | 21168 | 1007.86 | 15.19559 | 3 R.CWNRRA Splice@chr    | 1.36E-11 | 4.05E-04 |
| 22Feb2011 | 23548 | 984.81  | -24.8852 | 3 K.SGTIFDNI Splice@chr  | 4.41E-12 | 3.30E-04 |
| 22Feb2011 | 926   | 833.4   | -14.0782 | 1 _..RDEAQSK Splice@chr  | 4.56E-10 | 0.008337 |
| 22Feb2011 | 21523 | 1003.18 | 7.145987 | 3 R.CWNRRA Splice@chr    | 5.98E-13 | 0        |
| 22Feb2011 | 22877 | 975.8   | -15.4281 | 3 K.SGTIFDNI Splice@chr  | 1.21E-10 | 0.002669 |
| 22Feb2011 | 16873 | 792.42  | 5.26594  | 4 R.TTGVVLD chr2@1512    | 6.06E-11 | 0.001878 |
| 22Feb2011 | 17866 | 722.45  | -4.95112 | 2 R.RK+14.01 Splice@chr  | 2.73E-10 | 0.005441 |
| 22Feb2011 | 14661 | 623.03  | -18.2266 | 3 P.RNWGKC chrX@1446     | 1.98E-10 | 0.004397 |
| 22Feb2011 | 23436 | 795.65  | -15.5001 | 4 K.SGTIFDNI Splice@chr  | 5.18E-14 | 0        |
| 22Feb2011 | 3260  | 460.72  | 10.9535  | 2 R.MGMDPI Splice@chr    | 1.23E-10 | 0.002754 |
| 22Feb2011 | 18930 | 902.79  | -26.6077 | 3 K.RKLEYTIS Splice@chr  | 8.85E-11 | 0.002193 |
| 22Feb2011 | 25045 | 984.81  | -24.8852 | 3 K.SGTIFDNI Splice@chr  | 1.46E-11 | 4.05E-04 |
| 22Feb2011 | 14739 | 484.27  | -10.2722 | 3 K.ISSAIAMF Splice@chr  | 1.01E-10 | 0.002341 |
| 22Feb2011 | 25410 | 911.18  | 22.35347 | 3 R.KTDNKNI Splice@chr   | 4.35E-10 | 0.008226 |
| 22Feb2011 | 11401 | 747.57  | 5.690177 | 5 S.HLPRPGH Splice@chr   | 1.56E-10 | 0.003698 |
| 22Feb2011 | 22939 | 980.48  | -7.04314 | 3 K.SGTIFDNI Splice@chr  | 5.37E-10 | 0.009335 |
| 22Feb2011 | 23267 | 984.81  | -24.8852 | 3 K.SGTIFDNI Splice@chr  | 3.08E-12 | 0        |
| 22Feb2011 | 26358 | 769.88  | -19.0515 | 4 _..MSLIREK chr3@1235   | 3.96E-10 | 0.007575 |
| 22Feb2011 | 22272 | 634.84  | 6.410455 | 2 R.VDIGDILF Splice@chr  | 4.48E-13 | 0        |
| 22Feb2011 | 7224  | 434.24  | 13.9946  | 3 _..RSNDQTI chr5@6378   | 1.67E-10 | 0.003698 |
| 22Feb2011 | 18586 | 742.88  | -6.21424 | 2 K.M+15.99 chr4@1648    | 2.30E-10 | 0.004606 |
| 22Feb2011 | 23143 | 980.47  | -17.2661 | 3 K.SGTIFDNI Splice@chr  | 8.28E-12 | 4.05E-04 |
| 22Feb2011 | 19072 | 554.3   | -28.4599 | 2 K.CLGLGYL chr2@9237    | 3.39E-11 | 9.50E-04 |
| 22Feb2011 | 17980 | 722.45  | -4.95112 | 2 R.RK+14.01 Splice@chr  | 2.39E-10 | 0.004831 |
| 22Feb2011 | 23384 | 795.65  | -15.5001 | 4 K.SGTIFDNI Splice@chr  | 2.64E-14 | 0        |
| 22Feb2011 | 3082  | 418.89  | -10.5715 | 3 R.ENFATKC chr5@5231    | 3.65E-10 | 0.006839 |
| 22Feb2011 | 13122 | 833.42  | -4.62234 | 1 K.HEVTVFT chr4@1317    | 1.43E-10 | 0.003225 |
| 22Feb2011 | 24993 | 984.81  | -24.8852 | 3 K.SGTIFDNI Splice@chr  | 5.55E-12 | 3.30E-04 |
| 22Feb2011 | 23777 | 984.81  | -24.8852 | 3 K.SGTIFDNI Splice@chr  | 1.78E-10 | 0.004007 |
| 22Feb2011 | 21547 | 649.9   | -9.68814 | 2 K.LKIITNLEI chr2@6716  | 5.25E-10 | 0.009189 |
| 22Feb2011 | 22497 | 975.8   | -15.4281 | 3 K.SGTIFDNI Splice@chr  | 8.55E-11 | 0.002193 |
| 22Feb2011 | 23038 | 792.15  | -18.5783 | 4 K.SGTIFDNI Splice@chr  | 4.74E-17 | 0        |
| 22Feb2011 | 18640 | 742.88  | -6.21424 | 2 K.M+15.99 chr4@1648    | 5.24E-10 | 0.009189 |
| 22Feb2011 | 3245  | 735.33  | -27.5112 | 2 K.YGHANVI chr1@1065    | 3.62E-10 | 0.006839 |
| 22Feb2011 | 21469 | 1003.18 | 7.145987 | 3 R.CWNRRA Splice@chr    | 1.35E-13 | 0        |
| 22Feb2011 | 16163 | 622.33  | 9.587405 | 2 R.AK+14.01 chr2@4270   | 2.33E-10 | 0.004767 |
| 22Feb2011 | 18480 | 991.51  | 24.02083 | 3 _..IYVPADD Splice@chr  | 2.04E-13 | 0        |
| 22Feb2011 | 9240  | 423.26  | -10.1904 | 2 R.STVAAKII chr3@3295   | 5.21E-10 | 0.009049 |
| 22Feb2011 | 5499  | 741.38  | -23.1647 | 2 K.FPENRHI chr2@1477    | 3.93E-10 | 0.00751  |
| 22Feb2011 | 24530 | 795.65  | -15.5001 | 4 K.SGTIFDNI Splice@chr  | 3.92E-16 | 0        |
| 22Feb2011 | 7281  | 434.24  | 13.9946  | 3 _..RSNDQTI chr5@6378   | 5.03E-10 | 0.008913 |
| 22Feb2011 | 25406 | 1147.24 | 4.705638 | 3 R.FQSAAIG Splice@chr   | 6.34E-14 | 0        |

|           |       |         |          |                          |          |          |
|-----------|-------|---------|----------|--------------------------|----------|----------|
| 22Feb2011 | 8194  | 1089.65 | -29.1532 | 1 K.KLKSMKN chr5@3701    | 4.06E-11 | 0.001122 |
| 22Feb2011 | 22321 | 634.83  | -9.39461 | 2 R.VDIGDILF Splice@chr  | 2.25E-12 | 0        |
| 22Feb2011 | 23296 | 1060.54 | -6.74128 | 3 K.SGTIFDNI Splice@chr  | 2.50E-11 | 6.81E-04 |
| 22Feb2011 | 16545 | 759.4   | -15.0495 | 2 K.FIDANLQ chr4@8206    | 2.87E-10 | 0.005505 |
| 22Feb2011 | 25455 | 1147.25 | 13.44098 | 3 R.FQSAAIG Splice@chr   | 1.79E-16 | 0        |
| 22Feb2011 | 15594 | 833.42  | -19.2103 | 2 _..IIEPYVAV Splice@chr | 1.29E-10 | 0.002908 |
| 22Feb2011 | 8250  | 1089.65 | -29.1532 | 1 K.KLKSMKN chr5@3701    | 1.22E-10 | 0.002669 |
| 22Feb2011 | 23221 | 984.81  | -24.8852 | 3 K.SGTIFDNI Splice@chr  | 4.10E-14 | 0        |
| 22Feb2011 | 22378 | 634.84  | 6.410455 | 2 R.VDIGDILF Splice@chr  | 5.89E-13 | 0        |
| 22Feb2011 | 18742 | 1059.82 | -11.3751 | 3 I.SRSAAMF Splice@chr   | 9.26E-18 | 0        |
| 22Feb2011 | 15304 | 858.47  | -5.67211 | 3 _..LETGIKPI Splice@chr | 7.33E-11 | 0.001878 |
| 22Feb2011 | 20812 | 873.47  | 13.68595 | 2 R.SIFVDLEP Splice@chr  | 5.80E-12 | 3.30E-04 |
| 22Feb2011 | 24425 | 606.63  | -14.6199 | 3 K.KCNEEGC chr3@1174    | 1.86E-10 | 0.004158 |
| 22Feb2011 | 10879 | 550.82  | 1.472544 | 4 K.NPSKIQK chr3@2560    | 1.71E-10 | 0.003859 |
| 22Feb2011 | 12936 | 662.85  | -7.15081 | 2 S.INM+15.5 chr4@2551   | 4.54E-10 | 0.008337 |
| 22Feb2011 | 23276 | 795.65  | -15.5001 | 4 K.SGTIFDNI Splice@chr  | 3.61E-13 | 0        |
| 22Feb2011 | 12761 | 851.49  | -3.4814  | 2 K.RGVRLSH chr2@2785    | 4.57E-10 | 0.008337 |
| 22Feb2011 | 7466  | 533.82  | 16.26677 | 2 K.TNIYTILTI chr5@1325  | 3.53E-10 | 0.0067   |
| 22Feb2011 | 23602 | 1113.56 | -4.81022 | 3 R.ELGPIDIL chr4@3717   | 9.20E-17 | 0        |
| 22Feb2011 | 19398 | 644.4   | -15.5206 | 2 K.KIIISDFLP chr5@1401  | 3.75E-10 | 0.007383 |
| 22Feb2011 | 5969  | 693.86  | -21.1418 | 2 V.ICVAVGD chr5@1063    | 9.99E-12 | 2.86E-04 |
| 22Feb2011 | 20547 | 957.5   | 22.57714 | 3 K.LFQVLQN Splice@chr   | 1.46E-11 | 2.86E-04 |
| 22Feb2011 | 23360 | 984.82  | -14.7074 | 3 K.SGTIFDNI Splice@chr  | 1.90E-10 | 0.003684 |
| 22Feb2011 | 23362 | 795.65  | -23.4135 | 4 K.SGTIFDNI Splice@chr  | 1.44E-15 | 0        |
| 22Feb2011 | 14536 | 938.46  | 22.50833 | 2 R.ECSQSDS chr2@8876    | 8.00E-11 | 0.0013   |
| 22Feb2011 | 19796 | 1007.85 | 5.172966 | 3 R.CWNRRA Splice@chr    | 1.76E-10 | 0.003376 |
| 22Feb2011 | 19854 | 582.65  | 15.01592 | 3 R.SIFVDLEP Splice@chr  | 2.66E-11 | 5.65E-04 |
| 22Feb2011 | 24016 | 968.17  | -29.3651 | 3 R.FFYNIFAL chrX@4722   | 4.46E-10 | 0.008386 |
| 22Feb2011 | 4690  | 446.75  | 3.354779 | 2 R.IFSAGELF chr3@5608   | 3.54E-10 | 0.006847 |
| 22Feb2011 | 22085 | 795.39  | -27.0447 | 4 K.SGTIFDNI Splice@chr  | 9.72E-12 | 2.86E-04 |
| 22Feb2011 | 20592 | 957.5   | 22.57714 | 3 K.LFQVLQN Splice@chr   | 4.06E-10 | 0.007885 |
| 22Feb2011 | 22532 | 795.65  | -15.5001 | 4 K.SGTIFDNI Splice@chr  | 1.02E-13 | 0        |
| 22Feb2011 | 20417 | 1007.85 | 5.172966 | 3 R.CWNRRA Splice@chr    | 1.49E-10 | 0.002748 |
| 22Feb2011 | 12291 | 554.26  | 6.682444 | 2 R.M+15.99 Splice@chr   | 1.55E-10 | 0.002814 |
| 22Feb2011 | 19803 | 582.65  | 15.01592 | 3 R.SIFVDLEP Splice@chr  | 4.08E-11 | 8.12E-04 |
| 22Feb2011 | 22304 | 795.65  | -23.4135 | 4 K.SGTIFDNI Splice@chr  | 1.69E-12 | 0        |
| 22Feb2011 | 7258  | 1025.61 | -11.6755 | 1 K.LGLGSGL chr5@4945    | 6.69E-12 | 2.86E-04 |
| 22Feb2011 | 17780 | 1059.81 | -20.7519 | 3 I.SRSAAMF Splice@chr   | 1.59E-16 | 0        |
| 22Feb2011 | 14551 | 833.42  | -19.2103 | 2 _..IIEPYVAV Splice@chr | 1.54E-10 | 0.002814 |
| 22Feb2011 | 23177 | 911.42  | 20.49399 | 2 _..PRM+15. Splice@chr  | 3.57E-10 | 0.006847 |
| 22Feb2011 | 5910  | 693.86  | -21.1418 | 2 V.ICVAVGD chr5@1063    | 5.90E-12 | 2.10E-04 |
| 22Feb2011 | 4305  | 741.38  | -23.1647 | 2 K.FPENRHL chr2@1477    | 3.33E-10 | 0.006556 |
| 22Feb2011 | 11812 | 662.35  | -4.61447 | 2 S.INM+15.5 chr4@2551   | 3.87E-10 | 0.007753 |
| 22Feb2011 | 7143  | 1025.61 | -11.6755 | 1 K.LGLGSGL chr5@4945    | 7.16E-12 | 2.86E-04 |
| 22Feb2011 | 24273 | 1147.24 | 4.705638 | 3 R.FQSAAIG Splice@chr   | 2.21E-13 | 0        |
| 22Feb2011 | 24269 | 1062.62 | 12.79939 | 2 E.EYFFRNL chrX@1001    | 1.25E-10 | 0.002508 |
| 22Feb2011 | 19127 | 987.51  | 4.289691 | 3 K.KYLFLDNI chr4@1288   | 5.46E-11 | 0.001069 |

|           |       |         |          |                         |          |          |
|-----------|-------|---------|----------|-------------------------|----------|----------|
| 22Feb2011 | 6404  | 533.82  | 16.26677 | 2 K.TNIYTILTI chr5@1329 | 2.01E-10 | 0.003729 |
| 22Feb2011 | 19940 | 694.87  | 2.550973 | 2 K.YHNITLQ chrX@3836   | 3.97E-10 | 0.007816 |
| 22Feb2011 | 19941 | 1007.86 | 15.19559 | 3 R.CWNRRA Splice@chr   | 8.84E-11 | 0.001457 |
| 22Feb2011 | 21064 | 634.84  | 6.410455 | 2 R.VDIGDILF Splice@chr | 3.64E-12 | 2.10E-04 |
| 22Feb2011 | 22136 | 795.65  | -23.4135 | 4 K.SGTIFDNI Splice@chr | 8.65E-14 | 0        |
| 22Feb2011 | 17725 | 1059.82 | -11.3751 | 3 I.SRSAAMF Splice@chr  | 2.52E-17 | 0        |
| 22Feb2011 | 16031 | 888.97  | 20.94366 | 2 K.DITLEVEA Splice@chr | 4.68E-11 | 8.12E-04 |
| 22Feb2011 | 4361  | 741.38  | -23.1647 | 2 K.FPENRHI chr2@1477   | 3.21E-10 | 0.006187 |
| 22Feb2011 | 22236 | 795.65  | -23.4135 | 4 K.SGTIFDNI Splice@chr | 2.78E-14 | 0        |
| 22Feb2011 | 22284 | 968.13  | 18.26018 | 3 _GCSIVPIS Splice@chr  | 6.24E-11 | 0.001215 |
| 22Feb2011 | 11682 | 851.48  | -15.2578 | 2 K.RGVRLSH chr2@2785   | 3.36E-10 | 0.006556 |
| 22Feb2011 | 7122  | 1089.65 | -29.1532 | 1 K.KLKSMKN chr5@3701   | 4.06E-11 | 8.12E-04 |
| 22Feb2011 | 14653 | 938.46  | 22.50833 | 2 R.ECSQSDS chr2@8876   | 1.30E-10 | 0.002508 |
| 22Feb2011 | 11737 | 851.48  | -15.2578 | 2 K.RGVRLSH chr2@2785   | 2.32E-10 | 0.003807 |
| 22Feb2011 | 20320 | 1003.18 | 7.145987 | 3 R.CWNRRA Splice@chr   | 3.09E-12 | 2.10E-04 |
| 22Feb2011 | 13690 | 887.93  | 29.43791 | 2 I.DEREESTA Splice@chr | 5.03E-10 | 0.009246 |
| 22Feb2011 | 5672  | 523.78  | 24.05167 | 2 K.LWDNNE Splice@chr   | 1.57E-10 | 0.002814 |
| 22Feb2011 | 12353 | 554.26  | 6.682444 | 2 R.M+15.99 Splice@chr  | 2.38E-10 | 0.004122 |
| 22Feb2011 | 15008 | 622.33  | 9.587405 | 2 R.AK+14.01 chr2@4270  | 1.21E-10 | 0.002508 |
| 22Feb2011 | 14224 | 858.47  | -5.67211 | 3 _LETGIKPI Splice@chr  | 1.10E-11 | 2.86E-04 |
| 22Feb2011 | 14593 | 938.46  | 22.50833 | 2 R.ECSQSDS chr2@8876   | 3.77E-10 | 0.007456 |
| 22Feb2011 | 25259 | 828.38  | -20.1128 | 2 K.PNLK+14 chr2@3862   | 1.81E-10 | 0.003449 |
| 22Feb2011 | 23311 | 795.65  | -15.5001 | 4 K.SGTIFDNI Splice@chr | 6.64E-14 | 0        |
| 22Feb2011 | 21177 | 634.83  | -9.39461 | 2 R.VDIGDILF Splice@chr | 3.57E-12 | 2.10E-04 |
| 22Feb2011 | 16970 | 722.45  | -4.95112 | 2 R.RK+14.01 Splice@chr | 4.90E-10 | 0.009109 |
| 22Feb2011 | 20222 | 1003.18 | 7.145987 | 3 R.CWNRRA Splice@chr   | 2.36E-12 | 1.14E-04 |
| 22Feb2011 | 10208 | 747.57  | 5.690177 | 5 S.HLPRPGH Splice@chr  | 5.91E-11 | 0.001151 |
| 22Feb2011 | 16474 | 750.39  | -29.6236 | 2 R.KRM+15. chr4@5225   | 1.88E-10 | 0.003525 |
| 22Feb2011 | 17666 | 742.88  | -6.21424 | 2 K.M+15.99 chr4@1648   | 1.04E-10 | 0.001879 |
| 22Feb2011 | 4345  | 407.74  | 5.852463 | 2 R.ASDIAPIK chrX@1795  | 3.45E-10 | 0.006629 |
| 22Feb2011 | 22182 | 968.13  | 18.26018 | 3 _GCSIVPIS Splice@chr  | 1.61E-11 | 2.86E-04 |
| 22Feb2011 | 22191 | 1060.54 | -6.74128 | 3 K.SGTIFDNI Splice@chr | 8.91E-13 | 0        |
| 22Feb2011 | 15590 | 1056.56 | 28.0642  | 3 I.SRVEDDS Splice@chr  | 6.74E-16 | 0        |
| 22Feb2011 | 15067 | 622.33  | 9.587405 | 2 R.AK+14.01 chr2@4270  | 4.91E-10 | 0.009109 |
| 22Feb2011 | 23823 | 984.81  | -24.8852 | 3 K.SGTIFDNI Splice@chr | 7.24E-11 | 0.001215 |
| 22Feb2011 | 24884 | 713.68  | -6.48229 | 3 I.YSNTTNSI chr1@2335  | 2.69E-11 | 6.43E-04 |
| 22Feb2011 | 15495 | 759.4   | -15.0495 | 2 K.FIDANLQ chr4@8206   | 3.93E-10 | 0.007816 |
| 22Feb2011 | 21115 | 634.83  | -9.39461 | 2 R.VDIGDILF Splice@chr | 1.24E-12 | 0        |
| 22Feb2011 | 21116 | 767.74  | -27.8985 | 3 K.TFLKNPK chr3@1045   | 5.05E-10 | 0.009316 |
| 22Feb2011 | 17611 | 742.88  | -6.21424 | 2 K.M+15.99 chr4@1648   | 4.09E-10 | 0.007962 |
| 22Feb2011 | 9337  | 616.33  | -16.7632 | 2 K.LSKSVIFQ chr3@2798  | 5.32E-10 | 0.009965 |
| 22Feb2011 | 14165 | 858.47  | -5.67211 | 3 _LETGIKPI Splice@chr  | 1.90E-13 | 0        |
| 22Feb2011 | 16240 | 490.74  | -7.60235 | 2 K.DITMEIM chr3@1481   | 6.02E-10 | 0.009971 |
| 22Feb2011 | 23234 | 1060.53 | -16.1915 | 3 K.SGTIFDNI Splice@chr | 1.29E-13 | 0        |
| 22Feb2011 | 5135  | 741.38  | -23.1647 | 2 K.FPENRHI chr2@1477   | 4.24E-10 | 0.00835  |
| 22Feb2011 | 14850 | 887.93  | 29.43791 | 2 I.DEREESTA Splice@chr | 2.54E-10 | 0.005381 |
| 22Feb2011 | 16987 | 888.97  | 20.94366 | 2 K.DITLEVEA Splice@chr | 3.87E-10 | 0.007901 |

|           |       |         |          |                         |          |          |
|-----------|-------|---------|----------|-------------------------|----------|----------|
| 22Feb2011 | 25048 | 984.81  | -24.8852 | 3 K.SGTIFDNI Splice@chr | 3.96E-12 | 0        |
| 22Feb2011 | 8156  | 1089.65 | -29.1532 | 1 K.KLKSMKN chr5@3701   | 1.64E-10 | 0.003829 |
| 22Feb2011 | 16007 | 622.33  | 9.587405 | 2 R.AK+14.01 chr2@4270  | 6.89E-11 | 0.001828 |
| 22Feb2011 | 26050 | 598.64  | 12.32363 | 3 T.FQGVLDI Splice@chr  | 2.64E-10 | 0.005676 |
| 22Feb2011 | 10530 | 616.33  | -16.7632 | 2 K.LSKSVIFQ chr3@2798  | 2.09E-10 | 0.004538 |
| 22Feb2011 | 23116 | 1055.86 | -22.4368 | 3 K.SGTIFDNI Splice@chr | 3.15E-12 | 0        |
| 22Feb2011 | 10469 | 616.33  | -16.7632 | 2 K.LSKSVIFQ chr3@2798  | 6.01E-10 | 0.009971 |
| 22Feb2011 | 12728 | 851.48  | -15.2578 | 2 K.RGVRLSH chr2@2785   | 1.52E-10 | 0.00369  |
| 22Feb2011 | 3337  | 493.61  | 28.00299 | 3 _FQRHNLN chrX@1408    | 7.11E-11 | 0.001903 |
| 22Feb2011 | 26536 | 828.38  | -20.1128 | 2 K.PNLK+14 chr2@3862   | 2.56E-11 | 5.34E-04 |
| 22Feb2011 | 8209  | 1089.65 | -29.1532 | 1 K.KLKSMKN chr5@3701   | 1.37E-10 | 0.00364  |
| 22Feb2011 | 8217  | 1025.61 | -11.6755 | 1 K.LGLGSGL chr5@4945   | 5.89E-12 | 2.00E-04 |
| 22Feb2011 | 25096 | 984.81  | -24.8852 | 3 K.SGTIFDNI Splice@chr | 2.52E-11 | 5.34E-04 |
| 22Feb2011 | 858   | 508.6   | 0.721467 | 3 R.LHFCLLP5 chr2@3274  | 3.24E-10 | 0.006948 |
| 22Feb2011 | 23623 | 984.81  | -24.8852 | 3 K.SGTIFDNI Splice@chr | 1.15E-11 | 4.62E-04 |
| 22Feb2011 | 21535 | 1008.19 | 10.77099 | 3 R.CWNRRRA Splice@chr  | 4.13E-11 | 0.001274 |
| 22Feb2011 | 22201 | 634.84  | 6.410455 | 2 R.VDIGDILF Splice@chr | 6.84E-13 | 0        |
| 22Feb2011 | 7337  | 533.82  | 16.26677 | 2 K.TNIYTILTI chr5@1325 | 3.43E-10 | 0.007283 |
| 22Feb2011 | 7105  | 434.24  | 13.9946  | 3 _RSNDQTI chr5@6378    | 1.64E-11 | 4.62E-04 |
| 22Feb2011 | 12043 | 782.4   | -16.2268 | 3 I.NQSSM+1 chr2@6685   | 2.87E-11 | 6.21E-04 |
| 22Feb2011 | 21483 | 1007.85 | 5.172966 | 3 R.CWNRRRA Splice@chr  | 4.94E-11 | 0.001274 |
| 22Feb2011 | 15114 | 833.93  | -9.2006  | 2 _IIEPYVAM Splice@chr  | 1.31E-10 | 0.003334 |
| 22Feb2011 | 17242 | 902.54  | -28.5309 | 1 R.PFGVVVK chr2@1360   | 1.00E-10 | 0.002905 |
| 22Feb2011 | 26492 | 828.38  | -20.1128 | 2 K.PNLK+14 chr2@3862   | 1.55E-10 | 0.00369  |
| 22Feb2011 | 22778 | 975.8   | -15.4281 | 3 K.SGTIFDNI Splice@chr | 1.16E-10 | 0.003031 |
| 22Feb2011 | 24603 | 795.65  | -15.5001 | 4 K.SGTIFDNI Splice@chr | 3.84E-16 | 0        |
| 22Feb2011 | 19783 | 886.77  | -29.5706 | 3 G.FLFKSLC\ chr2@9496  | 5.27E-10 | 0.009328 |
| 22Feb2011 | 22311 | 634.83  | -9.39461 | 2 R.VDIGDILF Splice@chr | 7.81E-13 | 0        |
| 22Feb2011 | 22256 | 634.83  | -9.39461 | 2 R.VDIGDILF Splice@chr | 1.08E-12 | 0        |
| 22Feb2011 | 12667 | 851.48  | -15.2578 | 2 K.RGVRLSH chr2@2785   | 4.01E-10 | 0.008172 |
| 22Feb2011 | 23728 | 795.65  | -15.5001 | 4 K.SGTIFDNI Splice@chr | 2.45E-15 | 0        |
| 22Feb2011 | 20915 | 582.65  | 15.01592 | 3 R.SIFVDLEP Splice@chr | 7.28E-11 | 0.001903 |
| 22Feb2011 | 11776 | 521.95  | 6.014404 | 3 _AIFEQML chrX@4380    | 4.91E-10 | 0.009079 |
| 22Feb2011 | 16516 | 759.4   | -15.0495 | 2 K.FIDANLQ chr4@8206   | 3.24E-10 | 0.006948 |
| 22Feb2011 | 18807 | 1059.81 | -20.7519 | 3 I.SRSAAMF Splice@chr  | 3.30E-16 | 0        |
| 22Feb2011 | 25309 | 968.17  | -29.3651 | 3 R.FFYNIFAL chrX@4722  | 3.03E-10 | 0.006454 |
| 22Feb2011 | 21730 | 957.5   | 22.57714 | 3 K.LFQVLQN Splice@chr  | 5.70E-12 | 2.00E-04 |
| 22Feb2011 | 13346 | 554.26  | 6.682444 | 2 R.M+15.99 Splice@chr  | 9.24E-11 | 0.00236  |
| 22Feb2011 | 21437 | 897.45  | -3.04709 | 4 R.FWFFGKI chr2@7020   | 1.31E-10 | 0.003256 |
| 22Feb2011 | 21383 | 1007.85 | 5.172966 | 3 R.CWNRRRA Splice@chr  | 3.53E-10 | 0.007417 |
| 22Feb2011 | 24839 | 929.15  | -28.8338 | 3 R.KSTAKLK5 chr2@8595  | 2.30E-10 | 0.004964 |
| 22Feb2011 | 23306 | 1060.53 | -16.1915 | 3 K.SGTIFDNI Splice@chr | 2.78E-12 | 0        |
| 22Feb2011 | 18752 | 1060.15 | -15.5056 | 3 I.SRSAAMF Splice@chr  | 4.59E-17 | 0        |
| 22Feb2011 | 21678 | 957.5   | 22.57714 | 3 K.LFQVLQN Splice@chr  | 5.21E-10 | 0.009259 |
| 22Feb2011 | 25576 | 1147.24 | 4.705638 | 3 R.FQSAAIG Splice@chr  | 4.55E-13 | 0        |
| 22Feb2011 | 23776 | 795.65  | -15.5001 | 4 K.SGTIFDNI Splice@chr | 1.79E-12 | 0        |
| 22Feb2011 | 23224 | 984.81  | -24.8852 | 3 K.SGTIFDNI Splice@chr | 5.23E-12 | 2.00E-04 |

|           |       |         |          |                         |          |          |
|-----------|-------|---------|----------|-------------------------|----------|----------|
| 22Feb2011 | 7425  | 534.32  | 13.11853 | 2 K.TNIYTILTI chr5@1329 | 3.07E-10 | 0.006593 |
| 22Feb2011 | 12843 | 662.35  | -4.61447 | 2 S.INM+15.5 chr4@2551  | 3.43E-10 | 0.007283 |
| 22Feb2011 | 12401 | 661.7   | -24.738  | 3 K.FQEYLK+ chr5@1916   | 3.81E-10 | 0.007688 |
| 22Feb2011 | 12874 | 833.42  | -4.62234 | 1 K.HEVTVFT chr4@1317   | 3.96E-10 | 0.008034 |
| 22Feb2011 | 23065 | 795.65  | -15.5001 | 4 K.SGTIFDNI Splice@chr | 2.52E-14 | 0        |
| 22Feb2011 | 9588  | 431.74  | 5.455516 | 2 _PIQDVYK Splice@chr   | 2.19E-10 | 0.004822 |
| 22Feb2011 | 3505  | 735.33  | -27.5112 | 2 K.YGHANVI chr1@1065   | 2.16E-10 | 0.004757 |
| 22Feb2011 | 16911 | 792.42  | 5.26594  | 4 R.TTGVLVD chr2@1512   | 2.68E-10 | 0.005893 |
| 22Feb2011 | 21491 | 897.45  | -3.04709 | 4 R.FWFFGKI chr2@7020   | 2.78E-10 | 0.006034 |
| 22Feb2011 | 24783 | 929.15  | -28.8338 | 3 R.KSTAKLK chr2@8595   | 3.42E-10 | 0.007283 |
| 22Feb2011 | 23254 | 795.65  | -15.5001 | 4 K.SGTIFDNI Splice@chr | 2.63E-14 | 0        |
| 22Feb2011 | 18996 | 786.4   | -28.8866 | 2 R.FQTPQPL chrX@1230   | 1.27E-10 | 0.003178 |
| 22Feb2011 | 16185 | 490.74  | -7.60235 | 2 K.DITMEIM chr3@1481   | 5.27E-10 | 0.009328 |
| 22Feb2011 | 25489 | 968.51  | -23.6218 | 3 R.FFYNIFAL chrX@4722  | 8.85E-11 | 0.00236  |
| 22Feb2011 | 18502 | 991.51  | 24.02083 | 3 _IYVPADD Splice@chr   | 9.57E-16 | 0        |
| 22Feb2011 | 16066 | 622.33  | 9.587405 | 2 R.AK+14.01 chr2@4270  | 2.25E-10 | 0.004892 |
| 22Feb2011 | 21545 | 897.45  | -3.04709 | 4 R.FWFFGKI chr2@7020   | 1.06E-10 | 0.002978 |
| 22Feb2011 | 23202 | 795.65  | -15.5001 | 4 K.SGTIFDNI Splice@chr | 6.76E-13 | 0        |
| 22Feb2011 | 18623 | 742.88  | -6.21424 | 2 K.M+15.99 chr4@1648   | 1.62E-10 | 0.003755 |
| 22Feb2011 | 11705 | 747.56  | -7.71771 | 5 S.HLPRPGH Splice@chr  | 4.74E-10 | 0.008877 |
| 22Feb2011 | 21447 | 649.9   | -9.68814 | 2 K.LKIITNLEI chr2@6716 | 1.61E-10 | 0.003755 |
| 22Feb2011 | 16467 | 759.4   | -15.0495 | 2 K.FIDANLQ chr4@8206   | 1.97E-10 | 0.004482 |
| 22Feb2011 | 1052  | 833.4   | -14.0782 | 1 _RDEAQSk Splice@chr   | 5.70E-10 | 0.009776 |
| 22Feb2011 | 26088 | 1147.24 | 4.705638 | 3 R.FQSAAIG Splice@chr  | 1.90E-13 | 0        |
| 22Feb2011 | 14590 | 623.03  | -18.2266 | 3 P.RNWGKC chrX@1446    | 1.57E-10 | 0.003755 |
| 22Feb2011 | 21143 | 694.87  | 2.550973 | 2 K.YHNITLQ chrX@3836   | 5.50E-10 | 0.009188 |
| 22Feb2011 | 18479 | 991.51  | 24.02083 | 3 _IYVPADD Splice@chr   | 1.28E-16 | 0        |
| 22Feb2011 | 12731 | 662.35  | -4.61447 | 2 S.INM+15.5 chr4@2551  | 1.76E-10 | 0.003329 |
| 22Feb2011 | 26138 | 598.64  | 12.32363 | 3 T.FQGVLDN Splice@chr  | 6.98E-11 | 0.001348 |
| 22Feb2011 | 23500 | 795.65  | -15.5001 | 4 K.SGTIFDNI Splice@chr | 3.60E-15 | 0        |
| 22Feb2011 | 14683 | 887.93  | 29.43791 | 2 I.DEREESTN Splice@chr | 1.58E-10 | 0.003024 |
| 22Feb2011 | 23398 | 795.65  | -15.5001 | 4 K.SGTIFDNI Splice@chr | 9.02E-12 | 5.55E-04 |
| 22Feb2011 | 19724 | 747.41  | 11.74382 | 2 V.EK+14.01 Splice@chr | 3.32E-10 | 0.006156 |
| 22Feb2011 | 22343 | 634.84  | 6.410455 | 2 R.VDIGDILF Splice@chr | 7.69E-13 | 0        |
| 22Feb2011 | 25480 | 968.17  | -29.3651 | 3 R.FFYNIFAL chrX@4722  | 3.98E-10 | 0.007129 |
| 22Feb2011 | 20489 | 644.4   | -15.5206 | 2 K.KIISDFLP chr5@1401  | 4.77E-10 | 0.008009 |
| 22Feb2011 | 3265  | 411.7   | -22.8862 | 2 K.IYGGGGC chr4@1715   | 2.33E-13 | 0        |
| 22Feb2011 | 14498 | 484.28  | 10.44055 | 3 K.ISSAIAMF chr4@7544  | 7.67E-11 | 0.001348 |
| 22Feb2011 | 22978 | 975.8   | -15.4281 | 3 K.SGTIFDNI Splice@chr | 2.35E-10 | 0.004598 |
| 22Feb2011 | 13218 | 554.26  | 6.682444 | 2 R.M+15.99 Splice@chr  | 1.10E-10 | 0.002133 |
| 22Feb2011 | 22398 | 634.83  | -9.39461 | 2 R.VDIGDILF Splice@chr | 1.14E-12 | 0        |
| 22Feb2011 | 1256  | 418.89  | -10.5715 | 3 R.ENFATKC chr5@5231   | 3.77E-10 | 0.007129 |
| 22Feb2011 | 1356  | 418.89  | -10.5715 | 3 R.ENFATKC chr5@5231   | 6.43E-12 | 5.15E-04 |
| 22Feb2011 | 17868 | 635.34  | 18.57072 | 2 K.NCLKAEN chr2@3505   | 5.45E-10 | 0.0089   |
| 22Feb2011 | 14966 | 833.93  | -9.2006  | 2 _IIEPYVAV Splice@chr  | 2.32E-10 | 0.004598 |
| 22Feb2011 | 22294 | 634.84  | 6.410455 | 2 R.VDIGDILF Splice@chr | 5.50E-13 | 0        |
| 22Feb2011 | 23448 | 795.65  | -23.4135 | 4 K.SGTIFDNI Splice@chr | 1.28E-13 | 0        |

|           |       |         |          |                          |          |          |
|-----------|-------|---------|----------|--------------------------|----------|----------|
| 22Feb2011 | 7404  | 534.32  | 13.11853 | 2 K.TNIYTILTI chr5@1329  | 4.78E-10 | 0.008009 |
| 22Feb2011 | 17951 | 722.45  | -4.95112 | 2 R.RK+14.01 Splice@chr  | 3.78E-10 | 0.007129 |
| 22Feb2011 | 22209 | 730.93  | -11.0855 | 2 _._FFHKVK+ chr5@2007   | 4.68E-10 | 0.008009 |
| 22Feb2011 | 24774 | 917.51  | 5.964791 | 2 _._SIMSRLEI Splice@chr | 5.46E-10 | 0.008973 |
| 22Feb2011 | 21506 | 1003.18 | 7.145987 | 3 R.CWNRRA Splice@chr    | 1.39E-14 | 0        |
| 22Feb2011 | 13658 | 1174.09 | -25.7902 | 2 R.KGFWQV Splice@chr    | 3.99E-10 | 0.007129 |
| 22Feb2011 | 15968 | 622.33  | 9.587405 | 2 R.AK+14.01 chr2@4270   | 3.68E-10 | 0.006941 |
| 22Feb2011 | 18619 | 742.88  | -6.21424 | 2 K.M+15.99 chr4@1648    | 5.94E-10 | 0.009797 |
| 22Feb2011 | 8079  | 1089.65 | -29.1532 | 1 K.KLKSMKN chr5@3701    | 1.49E-10 | 0.002962 |
| 22Feb2011 | 13453 | 1115.1  | 6.276672 | 2 S.LYSSCPD chrX@1173    | 3.35E-10 | 0.006295 |
| 22Feb2011 | 18746 | 1060.15 | -15.5056 | 3 I.SRSAAMF Splice@chr   | 9.74E-19 | 0        |
| 22Feb2011 | 22459 | 634.84  | 6.410455 | 2 R.VDIGDILF Splice@chr  | 2.34E-12 | 2.20E-04 |
| 22Feb2011 | 23424 | 984.82  | -14.7074 | 3 K.SGTIFDNI Splice@chr  | 1.89E-11 | 5.55E-04 |
| 22Feb2011 | 17084 | 902.54  | -28.5309 | 1 R.PFGVVVK chr2@1360    | 2.04E-10 | 0.004006 |
| 22Feb2011 | 15515 | 938.46  | 22.50833 | 2 R.ECSQSDS chr2@8876    | 4.58E-10 | 0.007955 |
| 22Feb2011 | 25243 | 984.81  | -24.8852 | 3 K.SGTIFDNI Splice@chr  | 2.40E-11 | 6.19E-04 |
| 22Feb2011 | 8308  | 696.83  | -11.9803 | 2 R.TDRTESV chr1@1452    | 4.29E-10 | 0.00777  |
| 22Feb2011 | 26618 | 828.38  | -20.1128 | 2 K.PNLK+14 chr2@3862    | 4.23E-10 | 0.00777  |
| 22Feb2011 | 23732 | 984.81  | -24.8852 | 3 K.SGTIFDNI Splice@chr  | 7.98E-12 | 5.55E-04 |
| 22Feb2011 | 23247 | 795.65  | -23.4135 | 4 K.SGTIFDNI Splice@chr  | 9.06E-13 | 0        |
| 22Feb2011 | 8029  | 1089.65 | -29.1532 | 1 K.KLKSMKN chr5@3701    | 1.22E-10 | 0.002516 |
| 22Feb2011 | 24709 | 984.82  | -14.7074 | 3 K.SGTIFDNI Splice@chr  | 1.61E-11 | 5.55E-04 |
| 22Feb2011 | 21563 | 1003.18 | 7.145987 | 3 R.CWNRRA Splice@chr    | 4.09E-12 | 4.17E-04 |
| 22Feb2011 | 5195  | 741.38  | -23.1647 | 2 K.FPENRHI chr2@1477    | 3.67E-10 | 0.006871 |
| 22Feb2011 | 13975 | 454.25  | -15.7105 | 3 R.VLIRINGM Splice@chr  | 2.19E-10 | 0.004381 |
| 22Feb2011 | 6964  | 434.24  | 13.9946  | 3 _._RSNDQTI chr5@6378   | 3.59E-10 | 0.006727 |
| 22Feb2011 | 4698  | 430.75  | 0.781151 | 2 K.IMTTVGP Splice@chr   | 5.62E-10 | 0.009466 |
| 22Feb2011 | 15372 | 762.43  | 16.40509 | 2 _._MK+14.0 chr4@7749   | 5.33E-10 | 0.008619 |
| 22Feb2011 | 5803  | 447.23  | -22.0898 | 4 L.SK+14.01 chr4@7034   | 1.32E-10 | 0.002739 |
| 22Feb2011 | 20862 | 574.33  | -24.0364 | 3 _._FIWELLS Splice@chr  | 4.10E-10 | 0.007268 |
| 22Feb2011 | 18682 | 742.88  | -6.21424 | 2 K.M+15.99 chr4@1648    | 1.76E-10 | 0.003251 |
| 22Feb2011 | 24763 | 795.65  | -15.5001 | 4 K.SGTIFDNI Splice@chr  | 4.94E-14 | 0        |
| 22Feb2011 | 21496 | 649.9   | -9.68814 | 2 K.LKIITNLEI chr2@6716  | 2.40E-10 | 0.004816 |
| 22Feb2011 | 21827 | 957.5   | 22.57714 | 3 K.LFQVLQN Splice@chr   | 2.39E-10 | 0.004816 |
| 22Feb2011 | 23157 | 792.15  | -18.5783 | 4 K.SGTIFDNI Splice@chr  | 3.92E-16 | 0        |
| 22Feb2011 | 21653 | 1007.86 | 15.19559 | 3 R.CWNRRA Splice@chr    | 1.19E-10 | 0.002365 |
| 22Feb2011 | 7285  | 533.82  | 16.26677 | 2 K.TNIYTILTI chr5@1329  | 5.02E-10 | 0.008203 |
| 22Feb2011 | 15572 | 938.46  | 22.50833 | 2 R.ECSQSDS chr2@8876    | 1.90E-10 | 0.003781 |
| 22Feb2011 | 19673 | 747.41  | 11.74382 | 2 V.EK+14.01 chrX@6709   | 5.11E-10 | 0.008203 |
| 22Feb2011 | 24961 | 929.15  | -28.8338 | 3 R.KSTAKLK chr2@8593    | 1.72E-10 | 0.003172 |
| 22Feb2011 | 20669 | 864.94  | 10.49869 | 2 R.KSSTLMR chr4@1659    | 4.99E-12 | 4.17E-04 |
| 22Feb2011 | 25190 | 984.81  | -24.8852 | 3 K.SGTIFDNI Splice@chr  | 5.72E-11 | 8.60E-04 |
| 22Feb2011 | 23259 | 792.15  | -18.5783 | 4 K.SGTIFDNI Splice@chr  | 2.00E-18 | 0        |
| 22Feb2011 | 21095 | 694.87  | 2.550973 | 2 K.YHNITLQ chrX@3836    | 3.62E-10 | 0.006727 |
| 22Feb2011 | 18009 | 722.45  | -4.95112 | 2 R.RK+14.01 Splice@chr  | 3.82E-10 | 0.007129 |
| 22Feb2011 | 16468 | 759.4   | -15.0495 | 2 K.FIDANLQ chr4@8206    | 3.04E-10 | 0.00573  |
| 22Feb2011 | 22500 | 767.74  | -27.8985 | 3 K.TFLKNPK chr3@1043    | 5.49E-10 | 0.009044 |

|           |       |         |          |                           |          |          |
|-----------|-------|---------|----------|---------------------------|----------|----------|
| 22Feb2011 | 15149 | 599.28  | -28.7398 | 2 K.LCSTADT' chrX@1481    | 6.74E-11 | 0.001276 |
| 22Feb2011 | 24707 | 795.65  | -23.4135 | 4 K.SGTIFDNI Splice@chr   | 5.67E-15 | 0        |
| 22Feb2011 | 25430 | 968.51  | -23.6218 | 3 R.FFYNIFAL chrX@4721    | 3.64E-11 | 6.19E-04 |
| 22Feb2011 | 9290  | 703.86  | -3.21304 | 2 Y.VVQVAID chr1@1045     | 7.81E-13 | 0        |
| 22Feb2011 | 21986 | 795.65  | -15.5001 | 4 K.SGTIFDNI Splice@chr   | 5.10E-16 | 0        |
| 22Feb2011 | 12055 | 924.4   | -22.6053 | 2 Q.KPDDISN Splice@chr    | 8.18E-13 | 0        |
| 22Feb2011 | 11139 | 851.48  | -15.2578 | 2 K.RGVRLSH chr2@2785     | 1.90E-10 | 0.004241 |
| 22Feb2011 | 13463 | 833.93  | -9.2006  | 2 _..IIEPYVAV Splice@chr  | 1.53E-10 | 0.003574 |
| 22Feb2011 | 14118 | 938.46  | 22.50833 | 2 R.ECSQSDS chr2@8876     | 2.42E-10 | 0.005873 |
| 22Feb2011 | 18075 | 747.4   | -1.59422 | 2 V.EK+14.01 Splice@chr   | 6.98E-11 | 0.001463 |
| 22Feb2011 | 20154 | 957.5   | 22.57714 | 3 K.LFQVLQN Splice@chr    | 4.23E-10 | 0.009358 |
| 22Feb2011 | 3101  | 741.38  | -23.1647 | 2 K.FPENRHI' chr2@1471    | 4.67E-10 | 0.009905 |
| 22Feb2011 | 14513 | 622.33  | 9.587405 | 2 R.AK+14.01 chr2@4270    | 6.19E-11 | 0.001279 |
| 22Feb2011 | 5730  | 719.35  | -29.5675 | 2 L.RFPMTVE chr1@9136     | 2.84E-10 | 0.006261 |
| 22Feb2011 | 22598 | 980.48  | -7.04314 | 3 K.SGTIFDNI Splice@chr   | 3.14E-10 | 0.006744 |
| 22Feb2011 | 10060 | 521.95  | 5.936294 | 3 _..AIFEQM+ chrX@4380    | 2.37E-10 | 0.005715 |
| 22Feb2011 | 19886 | 1003.18 | 7.145987 | 3 R.CWNRRRA Splice@chr    | 2.89E-11 | 7.16E-04 |
| 22Feb2011 | 19987 | 1007.85 | 5.172966 | 3 R.CWNRRRA Splice@chr    | 3.28E-11 | 7.16E-04 |
| 22Feb2011 | 5153  | 434.24  | 13.9946  | 3 _..RSNDQTI chr5@6378    | 3.13E-10 | 0.006744 |
| 22Feb2011 | 17189 | 630.74  | 22.20865 | 3 Y.QVALLGA chr3@6607     | 7.64E-13 | 0        |
| 22Feb2011 | 20864 | 975.8   | -15.4281 | 3 K.SGTIFDNI Splice@chr   | 4.05E-10 | 0.009133 |
| 22Feb2011 | 20207 | 957.5   | 1.956888 | 3 R.FIEPIEDIF Splice@chr  | 2.05E-10 | 0.004323 |
| 22Feb2011 | 25370 | 760.4   | -4.0463  | 3 _..TQTNTKI' chrX@7978   | 2.56E-10 | 0.006039 |
| 22Feb2011 | 19832 | 1003.18 | 7.145987 | 3 R.CWNRRRA Splice@chr    | 3.09E-11 | 7.16E-04 |
| 22Feb2011 | 6601  | 622.65  | 20.40203 | 3 K.QIEQGEA Splice@chr    | 4.95E-13 | 0        |
| 22Feb2011 | 5450  | 534.32  | 13.11853 | 2 K.TNIYTILTI chr5@1329   | 1.14E-10 | 0.002912 |
| 22Feb2011 | 8411  | 638.84  | -15.3687 | 2 _..NFLNK+1 chr2@1147    | 3.57E-10 | 0.008401 |
| 22Feb2011 | 21708 | 795.65  | -15.5001 | 4 K.SGTIFDNI Splice@chr   | 3.34E-12 | 0        |
| 22Feb2011 | 6525  | 696.83  | -11.9803 | 2 R.TDRTESV chr1@1452     | 3.48E-10 | 0.008089 |
| 22Feb2011 | 13180 | 887.93  | 29.43791 | 2 I.DEREESTN Splice@chr   | 1.35E-10 | 0.003237 |
| 22Feb2011 | 22540 | 980.47  | -17.2661 | 3 K.SGTIFDNI Splice@chr   | 2.70E-11 | 6.29E-04 |
| 22Feb2011 | 13714 | 858.47  | -5.67211 | 3 _..LETGIKPI' Splice@chr | 6.18E-12 | 0        |
| 22Feb2011 | 10433 | 747.76  | -8.61645 | 5 S.HLPRPGH Splice@chr    | 2.32E-10 | 0.005455 |
| 22Feb2011 | 20660 | 634.83  | -9.39461 | 2 R.VDIGDILF Splice@chr   | 8.94E-14 | 0        |
| 22Feb2011 | 13828 | 858.47  | -5.67211 | 3 _..LETGIKPI' Splice@chr | 2.88E-14 | 0        |
| 22Feb2011 | 19447 | 1007.86 | 15.19559 | 3 R.CWNRRRA Splice@chr    | 2.52E-11 | 5.26E-04 |
| 22Feb2011 | 9812  | 747.56  | -7.71771 | 5 S.HLPRPGH Splice@chr    | 4.88E-11 | 0.001279 |
| 22Feb2011 | 15415 | 888.97  | 20.94366 | 2 K.DITLEVEA' Splice@chr  | 3.63E-12 | 0        |
| 22Feb2011 | 19381 | 582.65  | 15.01592 | 3 R.SIFVDLEP Splice@chr   | 1.81E-11 | 2.14E-04 |
| 22Feb2011 | 12204 | 924.4   | -22.6053 | 2 Q.KPDDISN Splice@chr    | 2.01E-10 | 0.004241 |
| 22Feb2011 | 23636 | 1147.24 | 4.705638 | 3 R.FQSAAG Splice@chr     | 5.25E-16 | 0        |
| 22Feb2011 | 19922 | 897.45  | -3.04709 | 4 R.FWFFGKI' chr2@7020    | 1.69E-10 | 0.003736 |
| 22Feb2011 | 21655 | 795.65  | -15.5001 | 4 K.SGTIFDNI Splice@chr   | 2.39E-16 | 0        |
| 22Feb2011 | 19025 | 761.88  | -3.44933 | 4 K.SGDAGIV Splice@chr    | 4.99E-11 | 0.001279 |
| 22Feb2011 | 20111 | 957.5   | 22.57714 | 3 K.LFQVLQN Splice@chr    | 2.44E-10 | 0.005873 |
| 22Feb2011 | 14290 | 753.95  | -13.1319 | 2 K.K+14.016 chr2@1375    | 6.77E-11 | 0.001463 |
| 22Feb2011 | 14946 | 965.76  | -8.14688 | 4 R.FPHFRAS chr1@4387     | 2.47E-10 | 0.005873 |

|           |       |         |          |                          |          |          |
|-----------|-------|---------|----------|--------------------------|----------|----------|
| 22Feb2011 | 14940 | 1056.22 | 29.33653 | 3 R.TTGVLVD Splice@chr   | 2.73E-12 | 0        |
| 22Feb2011 | 15352 | 785.42  | 22.95449 | 1 _..MPAWAF chr2@1115    | 2.04E-11 | 3.20E-04 |
| 22Feb2011 | 20608 | 634.83  | -9.39461 | 2 R.VDIGDILF Splice@chr  | 5.09E-13 | 0        |
| 22Feb2011 | 23452 | 968.17  | -29.3651 | 3 R.FFYNIFAL chrX@4722   | 3.16E-10 | 0.006909 |
| 22Feb2011 | 21403 | 795.65  | -15.5001 | 4 K.SGTIFDNI Splice@chr  | 1.15E-14 | 0        |
| 22Feb2011 | 20028 | 1007.85 | 5.172966 | 3 R.CWNRRA Splice@chr    | 1.77E-10 | 0.003911 |
| 22Feb2011 | 14456 | 622.33  | 9.587405 | 2 R.AK+14.01 chr2@4270   | 1.70E-10 | 0.003736 |
| 22Feb2011 | 19851 | 649.9   | -9.68814 | 2 K.LKIITNLEI chr2@6716  | 1.74E-10 | 0.003822 |
| 22Feb2011 | 5093  | 434.24  | 13.9946  | 3 _..RSNDQTI chr5@6378   | 2.12E-10 | 0.004406 |
| 22Feb2011 | 18701 | 798.15  | -11.5616 | 4 K.SGDAGIV Splice@chr   | 4.13E-10 | 0.009285 |
| 22Feb2011 | 18705 | 1064.19 | -19.6578 | 3 K.SGDAGIV Splice@chr   | 5.23E-12 | 0        |
| 22Feb2011 | 19823 | 897.45  | -3.04709 | 4 R.FWFFGKI chr2@7020    | 1.14E-10 | 0.002912 |
| 22Feb2011 | 9755  | 747.56  | -7.71771 | 5 S.HLPRPGH Splice@chr   | 2.02E-10 | 0.004323 |
| 22Feb2011 | 21605 | 795.65  | -23.4135 | 4 K.SGTIFDNI Splice@chr  | 1.76E-12 | 0        |
| 22Feb2011 | 5540  | 533.82  | 16.26677 | 2 K.TNIYTILTI chr5@1329  | 4.14E-10 | 0.009285 |
| 22Feb2011 | 17157 | 1059.81 | -20.7519 | 3 I.SRSAAMF Splice@chr   | 1.94E-14 | 0        |
| 22Feb2011 | 3157  | 741.38  | -23.1647 | 2 K.FPENRHI, chr2@1477   | 4.57E-10 | 0.009905 |
| 22Feb2011 | 20565 | 634.84  | 6.410455 | 2 R.VDIGDILF Splice@chr  | 6.11E-13 | 0        |
| 22Feb2011 | 18977 | 761.88  | -3.44933 | 4 K.SGDAGIV Splice@chr   | 2.09E-10 | 0.004406 |
| 22Feb2011 | 23681 | 1147.24 | 4.705638 | 3 R.FQSAAIG Splice@chr   | 6.19E-14 | 0        |
| 22Feb2011 | 14889 | 792.42  | 5.26594  | 4 R.TTGVLVD chr2@1512    | 2.47E-10 | 0.005873 |
| 22Feb2011 | 16491 | 722.45  | -4.95112 | 2 R.RK+14.01 Splice@chr  | 9.28E-11 | 0.002383 |
| 22Feb2011 | 13768 | 858.47  | -5.67211 | 3 _..LETGIKPI Splice@chr | 2.59E-13 | 0        |
| 22Feb2011 | 11198 | 851.48  | -15.2578 | 2 K.RGVRLSH chr2@2785    | 8.38E-11 | 0.002019 |
| 22Feb2011 | 16176 | 835.45  | -7.2977  | 4 R.K+14.016 chrX@9996   | 4.16E-10 | 0.009285 |
| 22Feb2011 | 9064  | 595.32  | -0.4108  | 3 R.DECYASK Splice@chr   | 1.53E-10 | 0.003574 |
| 22Feb2011 | 14642 | 490.74  | -7.60235 | 2 K.DITMEIM chr3@1481    | 1.76E-10 | 0.003911 |
| 22Feb2011 | 3216  | 741.38  | -23.1647 | 2 K.FPENRHI, chr2@1477   | 6.95E-11 | 0.001463 |
| 22Feb2011 | 12509 | 705.83  | -3.72364 | 2 M.PSMEEV Splice@chr    | 1.12E-13 | 0        |
| 22Feb2011 | 20794 | 1007.86 | 15.19559 | 3 R.CWNRRA Splice@chr    | 6.17E-11 | 0.001311 |
| 22Feb2011 | 21249 | 1007.85 | 5.172966 | 3 R.CWNRRA Splice@chr    | 2.74E-11 | 7.89E-04 |
| 22Feb2011 | 15989 | 622.33  | 9.587405 | 2 R.AK+14.01 chr2@4270   | 3.84E-10 | 0.008104 |
| 22Feb2011 | 15038 | 804.96  | 9.07939  | 2 _..EK+14.01 chr2@4905  | 1.10E-10 | 0.002149 |
| 22Feb2011 | 3695  | 412.56  | -22.1132 | 3 _..NPRGKKC Splice@chr  | 6.05E-11 | 0.001311 |
| 22Feb2011 | 19765 | 798.15  | -11.5616 | 4 K.SGDAGIV Splice@chr   | 4.16E-11 | 0.001048 |
| 22Feb2011 | 15542 | 938.46  | 22.50833 | 2 R.ECSQSDS chr2@8876    | 1.25E-10 | 0.002571 |
| 22Feb2011 | 23343 | 774.46  | 22.64844 | 2 K.WAELVVI chr3@1117    | 1.73E-10 | 0.003808 |
| 22Feb2011 | 7988  | 1089.65 | -29.1532 | 1 K.KLKSMKN chr5@3701    | 2.19E-10 | 0.00426  |
| 22Feb2011 | 21123 | 1003.18 | 7.145987 | 3 R.CWNRRA Splice@chr    | 1.05E-11 | 5.16E-04 |
| 22Feb2011 | 15163 | 858.47  | -5.67211 | 3 _..LETGIKPI Splice@chr | 2.89E-14 | 0        |
| 22Feb2011 | 18553 | 630.74  | 22.20865 | 3 Y.QVALLGA chr3@6607    | 3.52E-15 | 0        |
| 22Feb2011 | 11976 | 782.4   | -16.2268 | 3 I.NQSSM+1 chr2@6685    | 7.39E-12 | 5.16E-04 |
| 22Feb2011 | 23269 | 984.81  | -24.8852 | 3 K.SGTIFDNI Splice@chr  | 3.63E-11 | 9.70E-04 |
| 22Feb2011 | 15517 | 516.3   | 4.106203 | 3 R.NIIFLMVI chrX@1294   | 2.28E-10 | 0.004413 |
| 22Feb2011 | 9251  | 431.74  | 5.455516 | 2 _..PIQDVYK Splice@chr  | 1.80E-10 | 0.003884 |
| 22Feb2011 | 16442 | 759.4   | -15.0495 | 2 K.FIDANLQ chr4@8206    | 4.67E-10 | 0.009759 |
| 22Feb2011 | 2727  | 460.72  | 10.9535  | 2 R.MGMDPI Splice@chr    | 6.52E-11 | 0.001392 |

|           |       |         |          |                         |          |          |
|-----------|-------|---------|----------|-------------------------|----------|----------|
| 22Feb2011 | 21835 | 634.83  | -9.39461 | 2 R.VDIGDILF Splice@chr | 6.77E-13 | 0        |
| 22Feb2011 | 12665 | 662.85  | -7.15081 | 2 S.INM+15.5 chr4@2551  | 3.74E-10 | 0.007963 |
| 22Feb2011 | 19822 | 798.15  | -11.5616 | 4 K.SGDAGIV Splice@chr  | 2.55E-12 | 0        |
| 22Feb2011 | 15111 | 858.47  | -5.67211 | 3 _LETGIKPI Splice@chr  | 9.36E-12 | 5.16E-04 |
| 22Feb2011 | 21494 | 1008.19 | 10.77099 | 3 R.CWNRRRA Splice@chr  | 1.82E-11 | 7.14E-04 |
| 22Feb2011 | 8053  | 1025.61 | -11.6755 | 1 K.LGLGSGL chr5@4945   | 1.11E-11 | 5.16E-04 |
| 22Feb2011 | 15932 | 622.33  | 9.587405 | 2 R.AK+14.01 chr2@4270  | 5.84E-11 | 0.001311 |
| 22Feb2011 | 24939 | 1147.24 | 4.705638 | 3 R.FQSAAG Splice@chr   | 2.95E-15 | 0        |
| 22Feb2011 | 22670 | 795.65  | -15.5001 | 4 K.SGTIFDNI Splice@chr | 6.18E-13 | 0        |
| 22Feb2011 | 24631 | 1172.1  | -3.10143 | 2 K.K+14.016 chr5@1557  | 4.42E-10 | 0.009239 |
| 22Feb2011 | 18576 | 1060.15 | -15.5056 | 3 I.SRSAAMF Splice@chr  | 1.06E-15 | 0        |
| 22Feb2011 | 19713 | 798.15  | -11.5616 | 4 K.SGDAGIV Splice@chr  | 4.16E-10 | 0.008634 |
| 22Feb2011 | 18441 | 742.88  | -6.21424 | 2 K.M+15.99 chr4@1648   | 8.12E-11 | 0.001642 |
| 22Feb2011 | 24700 | 968.51  | -23.6218 | 3 R.FFYNIFAL chrX@4722  | 3.63E-10 | 0.007822 |
| 22Feb2011 | 24511 | 984.81  | -24.8852 | 3 K.SGTIFDNI Splice@chr | 3.14E-12 | 1.16E-04 |
| 22Feb2011 | 16869 | 888.97  | 20.94366 | 2 K.DITLEVEA Splice@chr | 1.16E-10 | 0.002407 |
| 22Feb2011 | 17868 | 722.45  | -4.95112 | 2 R.RK+14.01 Splice@chr | 7.46E-11 | 0.001479 |
| 22Feb2011 | 4747  | 756.43  | -9.04908 | 1 R.PLSAAAA chr5@3132   | 4.87E-10 | 0.00998  |
| 22Feb2011 | 21363 | 957.5   | 22.57714 | 3 K.LFQVLQN Splice@chr  | 2.21E-11 | 7.89E-04 |
| 22Feb2011 | 21941 | 634.84  | 6.410455 | 2 R.VDIGDILF Splice@chr | 1.21E-12 | 0        |
| 22Feb2011 | 21408 | 957.5   | 22.57714 | 3 K.LFQVLQN Splice@chr  | 2.76E-11 | 7.89E-04 |
| 22Feb2011 | 16576 | 1056.56 | 28.0642  | 3 I.SRVEDDS Splice@chr  | 4.33E-13 | 0        |
| 22Feb2011 | 18518 | 1059.81 | -20.7519 | 3 I.SRSAAMF Splice@chr  | 7.46E-17 | 0        |
| 22Feb2011 | 1866  | 439.91  | 17.33685 | 3 K.NSQKNPI chr2@3540   | 2.54E-10 | 0.005221 |
| 22Feb2011 | 9004  | 724.34  | 5.400383 | 3 V.CLTEEGK Splice@chr  | 2.48E-10 | 0.005221 |
| 22Feb2011 | 24070 | 795.65  | -15.5001 | 4 K.SGTIFDNI Splice@chr | 3.16E-13 | 0        |
| 22Feb2011 | 23862 | 962.47  | -16.0654 | 3 R.WFWGQI chr4@3030    | 3.54E-10 | 0.007673 |
| 22Feb2011 | 11512 | 747.56  | -7.71771 | 5 S.HLPRPGH Splice@chr  | 2.04E-10 | 0.004018 |
| 22Feb2011 | 16139 | 490.74  | -7.60235 | 2 K.DITMEIM chr3@1481   | 2.72E-10 | 0.005873 |
| 22Feb2011 | 4949  | 741.38  | -23.1647 | 2 K.FPENRHI chr2@1477   | 3.46E-10 | 0.007601 |
| 22Feb2011 | 16813 | 792.42  | 5.26594  | 4 R.TTGVVLD chr2@1512   | 1.01E-11 | 5.16E-04 |
| 22Feb2011 | 8196  | 696.83  | -11.9803 | 2 R.TDRTESV chr1@1452   | 2.95E-10 | 0.006338 |
| 22Feb2011 | 23120 | 795.65  | -23.4135 | 4 K.SGTIFDNI Splice@chr | 1.17E-10 | 0.002407 |
| 22Feb2011 | 1823  | 439.91  | 17.33685 | 3 K.NSQKNPI chr2@3540   | 4.30E-10 | 0.009008 |
| 22Feb2011 | 399   | 439.74  | 18.7116  | 2 R.SIAMFGP chr2@4157   | 4.03E-11 | 0.001048 |
| 22Feb2011 | 24023 | 795.65  | -15.5001 | 4 K.SGTIFDNI Splice@chr | 8.49E-14 | 0        |
| 22Feb2011 | 23051 | 795.65  | -23.4135 | 4 K.SGTIFDNI Splice@chr | 9.87E-14 | 0        |
| 22Feb2011 | 21179 | 649.9   | -9.68814 | 2 K.LKIITNLEI chr2@6716 | 6.71E-11 | 0.001392 |
| 22Feb2011 | 21884 | 634.83  | -9.39461 | 2 R.VDIGDILF Splice@chr | 7.10E-13 | 0        |
| 22Feb2011 | 502   | 439.74  | 18.7116  | 2 R.SIAMFGP chr2@4157   | 3.60E-10 | 0.007822 |
| 22Feb2011 | 15222 | 858.47  | -5.67211 | 3 _LETGIKPI Splice@chr  | 2.15E-13 | 0        |
| 22Feb2011 | 15484 | 938.46  | 22.50833 | 2 R.ECSQSDS chr2@8876   | 2.20E-10 | 0.00426  |
| 22Feb2011 | 14683 | 887.93  | 29.43791 | 2 I.DEREESTA Splice@chr | 8.88E-11 | 0.001732 |
| 22Feb2011 | 23154 | 650.08  | 4.795781 | 4 _VLPEGSIS Splice@chr  | 3.03E-10 | 0.006659 |
| 22Feb2011 | 26061 | 760.4   | -4.0463  | 3 _TQTNTKI chrX@7978    | 1.51E-10 | 0.003141 |
| 22Feb2011 | 20813 | 694.87  | 2.550973 | 2 K.YHNITLQ chrX@3836   | 4.52E-10 | 0.009542 |
| 22Feb2011 | 17679 | 576.37  | -8.27427 | 2 K.KLILPHFR chr2@4900  | 4.31E-10 | 0.009008 |

|           |       |         |          |                         |          |          |
|-----------|-------|---------|----------|-------------------------|----------|----------|
| 22Feb2011 | 450   | 439.74  | 18.7116  | 2 R.SIAMFGP chr2@4157   | 4.38E-10 | 0.009008 |
| 22Feb2011 | 7266  | 533.82  | 16.26677 | 2 K.TNIYILTl chr5@1329  | 1.46E-10 | 0.003066 |
| 22Feb2011 | 25316 | 598.64  | 12.32363 | 3 T.FQGVLDN Splice@chr  | 8.38E-11 | 0.001642 |
| 22Feb2011 | 23217 | 984.81  | -24.8852 | 3 K.SGTIFDNI Splice@chr | 4.56E-11 | 0.001048 |
| 22Feb2011 | 6919  | 434.24  | 13.9946  | 3 _RSNDQTI chr5@6378    | 9.51E-11 | 0.001991 |
| 22Feb2011 | 22953 | 795.65  | -15.5001 | 4 K.SGTIFDNI Splice@chr | 3.29E-13 | 0        |
| 22Feb2011 | 21171 | 1003.18 | 7.145987 | 3 R.CWNRRRA Splice@chr  | 1.25E-11 | 5.16E-04 |
| 22Feb2011 | 19275 | 661.39  | 17.1596  | 2 R.AFIIRM+ chrX@7389   | 4.11E-10 | 0.008561 |
| 22Feb2011 | 296   | 439.73  | -4.03447 | 2 R.SIAMFGP chr2@4157   | 8.52E-11 | 0.001642 |
| 22Feb2011 | 25027 | 1147.24 | 4.705638 | 3 R.FQSAAIG Splice@chr  | 3.08E-14 | 0        |
| 22Feb2011 | 6629  | 493.78  | -11.3951 | 2 R.KNQENLI Splice@chr  | 3.61E-10 | 0.008068 |
| 22Feb2011 | 11726 | 705.83  | -3.72364 | 2 M.PSMEEV Splice@chr   | 1.06E-11 | 3.40E-04 |
| 22Feb2011 | 2205  | 584.3   | -7.53396 | 2 R.FSLKNTel chr4@2692  | 6.65E-11 | 0.0019   |
| 22Feb2011 | 2590  | 488.28  | 18.24649 | 2 K.INAEFVG chr4@4519   | 1.15E-10 | 0.002673 |
| 22Feb2011 | 4277  | 741.38  | -23.1647 | 2 K.FPENRHI chr2@1477   | 2.76E-10 | 0.006527 |
| 22Feb2011 | 21484 | 795.65  | -15.5001 | 4 K.SGTIFDNI Splice@chr | 1.14E-14 | 0        |
| 22Feb2011 | 14173 | 858.47  | -5.67211 | 3 _LETGIKPI Splice@chr  | 5.51E-13 | 0        |
| 22Feb2011 | 12319 | 516.29  | 9.357636 | 2 K.VSVDVLE chrX@1218   | 4.13E-11 | 0.001028 |
| 22Feb2011 | 19583 | 1008.18 | 0.829193 | 3 R.CWNRRRA Splice@chr  | 2.65E-11 | 6.36E-04 |
| 22Feb2011 | 18759 | 1003.18 | 7.145987 | 3 R.CWNRRRA Splice@chr  | 6.58E-13 | 0        |
| 22Feb2011 | 20095 | 887.92  | -15.9388 | 2 S.FCLLYKGF Splice@chr | 2.08E-10 | 0.005116 |
| 22Feb2011 | 13732 | 887.93  | 29.43791 | 2 I.DEREESTN Splice@chr | 3.10E-10 | 0.007088 |
| 22Feb2011 | 15620 | 792.42  | 5.26594  | 4 R.TTGVVLD chr2@1512   | 1.11E-10 | 0.002673 |
| 22Feb2011 | 21739 | 774.46  | 22.64844 | 2 K.WAELVVI chr3@1117   | 2.05E-10 | 0.005029 |
| 22Feb2011 | 17159 | 742.88  | -6.21424 | 2 K.M+15.99 chr4@1648   | 1.66E-10 | 0.003901 |
| 22Feb2011 | 15748 | 888.97  | 20.94366 | 2 K.DITLEVEA Splice@chr | 1.18E-10 | 0.002673 |
| 22Feb2011 | 10716 | 747.56  | -7.71771 | 5 S.HLPRPGH Splice@chr  | 6.24E-11 | 0.001509 |
| 22Feb2011 | 23306 | 860.68  | 2.433027 | 4 R.FQSAAIG Splice@chr  | 2.87E-11 | 6.36E-04 |
| 22Feb2011 | 13956 | 833.93  | -9.2006  | 2 _IIEPYVAV Splice@chr  | 6.29E-11 | 0.001609 |
| 22Feb2011 | 14902 | 622.33  | 9.587405 | 2 R.AK+14.01 chr2@4270  | 3.21E-10 | 0.007243 |
| 22Feb2011 | 19769 | 1007.85 | 5.172966 | 3 R.CWNRRRA Splice@chr  | 6.91E-11 | 0.001981 |
| 22Feb2011 | 20445 | 634.84  | 6.410455 | 2 R.VDIGDILF Splice@chr | 1.04E-12 | 0        |
| 22Feb2011 | 23720 | 713.68  | -6.48229 | 3 I.YSNTTNSI chr1@2335  | 1.94E-10 | 0.004773 |
| 22Feb2011 | 2640  | 488.28  | 18.24649 | 2 K.INAEFVG chr4@4519   | 6.26E-12 | 3.40E-04 |
| 22Feb2011 | 21384 | 795.65  | -15.5001 | 4 K.SGTIFDNI Splice@chr | 2.61E-13 | 0        |
| 22Feb2011 | 19812 | 1007.85 | 5.172966 | 3 R.CWNRRRA Splice@chr  | 3.18E-10 | 0.007243 |
| 22Feb2011 | 14531 | 938.46  | 22.50833 | 2 R.ECSQSDS chr2@8876   | 7.01E-11 | 0.001981 |
| 22Feb2011 | 16528 | 722.45  | -4.95112 | 2 R.RK+14.01 Splice@chr | 3.48E-10 | 0.007749 |
| 22Feb2011 | 14849 | 622.33  | 9.587405 | 2 R.AK+14.01 chr2@4270  | 2.97E-10 | 0.006756 |
| 22Feb2011 | 18881 | 761.88  | -3.44933 | 4 K.SGDAGIV Splice@chr  | 1.35E-10 | 0.003024 |
| 22Feb2011 | 20491 | 634.84  | 6.410455 | 2 R.VDIGDILF Splice@chr | 1.39E-12 | 1.25E-04 |
| 22Feb2011 | 23250 | 1147.25 | 13.44098 | 3 R.FQSAAIG Splice@chr  | 1.19E-14 | 0        |
| 22Feb2011 | 17231 | 1060.15 | -15.5056 | 3 I.SRSAAMF Splice@chr  | 1.55E-17 | 0        |
| 22Feb2011 | 18490 | 987.51  | 4.289691 | 3 K.KYLFLDNI chr4@1288  | 3.79E-10 | 0.008578 |
| 22Feb2011 | 22485 | 795.65  | -15.5001 | 4 K.SGTIFDNI Splice@chr | 2.83E-13 | 0        |
| 22Feb2011 | 6560  | 570.33  | 10.24926 | 2 K.QIHHSLYI Splice@chr | 1.45E-10 | 0.003289 |
| 22Feb2011 | 10310 | 747.57  | 5.690177 | 5 S.HLPRPGH Splice@chr  | 9.87E-11 | 0.002521 |

|           |       |         |          |                         |          |          |
|-----------|-------|---------|----------|-------------------------|----------|----------|
| 22Feb2011 | 21250 | 795.66  | -2.97654 | 4 K.SGTIFDNI Splice@chr | 4.58E-11 | 0.001028 |
| 22Feb2011 | 7247  | 1025.61 | -11.6755 | 1 K.LGLGSGL chr5@4945   | 9.23E-12 | 3.40E-04 |
| 22Feb2011 | 22862 | 984.81  | -24.8852 | 3 K.SGTIFDNI Splice@chr | 1.21E-11 | 3.40E-04 |
| 22Feb2011 | 19650 | 1003.18 | 7.145987 | 3 R.CWNRRRA Splice@chr  | 9.34E-13 | 0        |
| 22Feb2011 | 11757 | 851.49  | -3.4814  | 2 K.RGVRLSH chr2@2785   | 3.32E-10 | 0.007415 |
| 22Feb2011 | 23281 | 1147.24 | 4.705638 | 3 R.FQSAAIG Splice@chr  | 1.80E-15 | 0        |
| 22Feb2011 | 21669 | 984.81  | -24.8852 | 3 K.SGTIFDNI Splice@chr | 1.20E-10 | 0.002673 |
| 22Feb2011 | 21825 | 795.65  | -15.5001 | 4 K.SGTIFDNI Splice@chr | 5.74E-15 | 0        |
| 22Feb2011 | 21783 | 774.46  | 22.64844 | 2 K.WAELVVI chr3@1117   | 7.53E-12 | 3.40E-04 |
| 22Feb2011 | 21435 | 795.65  | -15.5001 | 4 K.SGTIFDNI Splice@chr | 1.31E-13 | 0        |
| 22Feb2011 | 23596 | 897.95  | 3.643817 | 2 T.FQGVLDN Splice@chr  | 3.41E-10 | 0.00767  |
| 22Feb2011 | 21531 | 795.65  | -15.5001 | 4 K.SGTIFDNI Splice@chr | 2.41E-14 | 0        |
| 22Feb2011 | 17279 | 1059.82 | -11.3751 | 3 I.SRSAAMF Splice@chr  | 1.27E-15 | 0        |
| 22Feb2011 | 18537 | 798.15  | -11.5616 | 4 K.SGDAGIV Splice@chr  | 1.16E-10 | 0.002673 |
| 22Feb2011 | 19666 | 649.9   | -9.68814 | 2 K.LKIITNLEI chr2@6716 | 2.70E-10 | 0.006527 |
| 22Feb2011 | 11116 | 747.76  | -8.61645 | 5 S.HLPRPGH Splice@chr  | 2.39E-10 | 0.005966 |
| 22Feb2011 | 6139  | 795.42  | 1.690276 | 1 K.MTGIAFR chr4@1145   | 2.82E-10 | 0.006684 |
| 22Feb2011 | 4328  | 741.38  | -23.1647 | 2 K.FPENRHL chr2@1477   | 4.21E-10 | 0.009634 |
| 22Feb2011 | 7301  | 1025.61 | -11.6755 | 1 K.LGLGSGL chr5@4945   | 8.82E-12 | 3.40E-04 |
| 22Feb2011 | 7307  | 1089.65 | -29.1532 | 1 K.KLKSMKN chr5@3701   | 4.06E-11 | 0.001028 |
| 22Feb2011 | 15083 | 712.4   | -22.2875 | 3 F.LRSLSTEV chrX@1664  | 4.31E-10 | 0.009802 |
| 22Feb2011 | 12858 | 894.41  | 13.57006 | 2 _FDSDDVT Splice@chr   | 4.15E-10 | 0.009308 |
| 22Feb2011 | 19629 | 1007.85 | 5.172966 | 3 R.CWNRRRA Splice@chr  | 6.25E-11 | 0.001509 |
| 22Feb2011 | 17109 | 742.88  | -6.21424 | 2 K.M+15.99 chr4@1648   | 4.35E-10 | 0.009962 |
| 22Feb2011 | 18558 | 1063.86 | -15.3899 | 3 K.SGDAGIV Splice@chr  | 4.32E-10 | 0.009886 |
| 22Feb2011 | 14117 | 858.48  | 6.006088 | 3 _LETGIKPI Splice@chr  | 2.19E-13 | 0        |
| 22Feb2011 | 14016 | 833.94  | 2.824179 | 2 _IIEPYVAV Splice@chr  | 2.83E-10 | 0.006684 |
| 22Feb2011 | 20050 | 957.5   | 22.57714 | 3 K.LFQVLQN Splice@chr  | 3.16E-10 | 0.007243 |
| 22Feb2011 | 23316 | 1147.25 | 13.44098 | 3 R.FQSAAIG Splice@chr  | 4.07E-14 | 0        |
| 22Feb2011 | 17276 | 1167.55 | -25.3067 | 2 L.K+14.016 Splice@chr | 3.15E-12 | 1.25E-04 |
| 22Feb2011 | 13789 | 887.93  | 29.43791 | 2 I.DEREESTN Splice@chr | 2.70E-10 | 0.006527 |
| 22Feb2011 | 6664  | 693.86  | -21.1418 | 2 V.ICVAVGD chr5@1065   | 2.28E-11 | 8.26E-04 |
| 22Feb2011 | 5339  | 446.75  | 3.354779 | 2 R.IFSAGELF chr3@5608  | 1.90E-10 | 0.004754 |
| 22Feb2011 | 24430 | 799.15  | -20.3276 | 4 K.SGTIFDNI Splice@chr | 8.10E-11 | 0.002527 |
| 22Feb2011 | 25064 | 860.68  | 2.433027 | 4 R.FQSAAIG Splice@chr  | 2.09E-11 | 7.36E-04 |
| 22Feb2011 | 22995 | 984.81  | -24.8852 | 3 K.SGTIFDNI Splice@chr | 5.29E-12 | 0        |
| 22Feb2011 | 3632  | 412.56  | -22.1132 | 3 _NPRGKKC Splice@chr   | 1.52E-10 | 0.004314 |
| 22Feb2011 | 19286 | 661.39  | 17.1596  | 2 R.AFIIRM+ chrX@7389   | 4.50E-11 | 0.001669 |
| 22Feb2011 | 7962  | 1089.65 | -29.1532 | 1 K.KLKSMKN chr5@3701   | 2.59E-10 | 0.006301 |
| 22Feb2011 | 15276 | 592.36  | -24.6673 | 2 K.LIKISTNA chr5@1997  | 2.17E-10 | 0.005156 |
| 22Feb2011 | 25093 | 1147.24 | 4.705638 | 3 R.FQSAAIG Splice@chr  | 7.33E-16 | 0        |
| 22Feb2011 | 24328 | 795.65  | -15.5001 | 4 K.SGTIFDNI Splice@chr | 8.27E-14 | 0        |
| 22Feb2011 | 22628 | 975.8   | -15.4281 | 3 K.SGTIFDNI Splice@chr | 1.82E-10 | 0.004687 |
| 22Feb2011 | 23457 | 774.46  | 22.64844 | 2 K.WAELVVI chr3@1117   | 7.39E-12 | 0        |
| 22Feb2011 | 9018  | 724.34  | 5.400383 | 3 V.CLTEEGK Splice@chr  | 4.84E-11 | 0.001669 |
| 22Feb2011 | 7162  | 533.82  | 16.26677 | 2 K.TNIYTILT chr5@1329  | 2.28E-10 | 0.005316 |
| 22Feb2011 | 15165 | 762.42  | 3.25006  | 2 _MK+14.0 chr4@7749    | 4.39E-10 | 0.00999  |

|           |       |         |          |                          |          |          |
|-----------|-------|---------|----------|--------------------------|----------|----------|
| 22Feb2011 | 23656 | 1015.49 | -29.2989 | 2 R.FMNSSK chr2@8237     | 2.22E-10 | 0.005238 |
| 22Feb2011 | 4972  | 741.38  | -23.1647 | 2 K.FPENRHI chr2@1477    | 4.33E-10 | 0.00999  |
| 22Feb2011 | 23505 | 795.65  | -23.4135 | 4 K.SGTIFDNI Splice@chr  | 1.10E-14 | 0        |
| 22Feb2011 | 22165 | 634.83  | -9.39461 | 2 R.VDIGDILF Splice@chr  | 2.91E-13 | 0        |
| 22Feb2011 | 15737 | 679.02  | 15.8828  | 3 K.M+15.99 Splice@chr   | 1.55E-10 | 0.004479 |
| 22Feb2011 | 20721 | 582.65  | 15.01592 | 3 R.SIFVDLEP Splice@chr  | 1.13E-11 | 0        |
| 22Feb2011 | 77    | 509.3   | -20.473  | 2 R.SSVIMLIV chr2@5767   | 2.66E-11 | 9.29E-04 |
| 22Feb2011 | 6911  | 434.24  | 13.9946  | 3 _RSNDQTI chr5@6378     | 2.96E-10 | 0.00718  |
| 22Feb2011 | 13211 | 554.26  | 6.682444 | 2 R.M+15.99 Splice@chr   | 5.11E-11 | 0.001847 |
| 22Feb2011 | 21443 | 957.5   | 22.57714 | 3 K.LFQVLQN Splice@chr   | 1.41E-11 | 1.08E-04 |
| 22Feb2011 | 15060 | 858.47  | -5.67211 | 3 _LETGIKPI Splice@chr   | 1.09E-14 | 0        |
| 22Feb2011 | 24715 | 984.81  | -24.8852 | 3 K.SGTIFDNI Splice@chr  | 1.59E-11 | 2.14E-04 |
| 22Feb2011 | 18485 | 1059.81 | -20.7519 | 3 I.SRSAAMF Splice@chr   | 3.02E-17 | 0        |
| 22Feb2011 | 25053 | 1147.24 | 4.705638 | 3 R.FQSAAIG Splice@chr   | 2.81E-14 | 0        |
| 22Feb2011 | 4511  | 526.78  | -3.83085 | 2 K.KLDLNM chr2@7182     | 2.19E-11 | 8.26E-04 |
| 22Feb2011 | 23363 | 984.81  | -24.8852 | 3 K.SGTIFDNI Splice@chr  | 4.79E-11 | 0.001669 |
| 22Feb2011 | 14386 | 484.27  | -10.2722 | 3 K.ISSAIAMf chr4@7544   | 1.06E-11 | 0        |
| 22Feb2011 | 24861 | 968.51  | -23.6218 | 3 R.FFYNIFAL chrX@4722   | 2.50E-10 | 0.006301 |
| 22Feb2011 | 13557 | 924.9   | -24.4218 | 2 Q.KPDDISN Splice@chr   | 1.79E-14 | 0        |
| 22Feb2011 | 24273 | 984.82  | -14.7074 | 3 K.SGTIFDNI Splice@chr  | 1.94E-12 | 0        |
| 22Feb2011 | 24270 | 795.65  | -15.5001 | 4 K.SGTIFDNI Splice@chr  | 1.92E-15 | 0        |
| 22Feb2011 | 21178 | 1003.18 | 7.145987 | 3 R.CWNRRA Splice@chr    | 1.25E-13 | 0        |
| 22Feb2011 | 21173 | 1007.85 | 5.172966 | 3 R.CWNRRA Splice@chr    | 1.30E-11 | 0        |
| 22Feb2011 | 20225 | 1003.18 | 7.145987 | 3 R.CWNRRA Splice@chr    | 1.43E-11 | 1.08E-04 |
| 22Feb2011 | 21233 | 1003.18 | 7.145987 | 3 R.CWNRRA Splice@chr    | 3.14E-11 | 0.001016 |
| 22Feb2011 | 15006 | 858.47  | -5.67211 | 3 _LETGIKPI Splice@chr   | 2.52E-14 | 0        |
| 22Feb2011 | 17703 | 635.34  | 18.57072 | 2 K.NCLKAEN chr2@3509    | 3.13E-10 | 0.007744 |
| 22Feb2011 | 18540 | 1060.15 | -15.5056 | 3 I.SRSAAMF Splice@chr   | 5.48E-14 | 0        |
| 22Feb2011 | 18545 | 630.74  | 22.20865 | 3 Y.QVALLGA chr3@6607    | 3.18E-13 | 0        |
| 22Feb2011 | 21264 | 649.9   | -9.68814 | 2 K.LKIITNLEI chr2@6716  | 2.98E-10 | 0.00718  |
| 22Feb2011 | 23158 | 795.65  | -15.5001 | 4 K.SGTIFDNI Splice@chr  | 9.58E-14 | 0        |
| 22Feb2011 | 16001 | 490.74  | -7.60235 | 2 K.DITMEIM chr3@1481    | 4.07E-10 | 0.009462 |
| 22Feb2011 | 18514 | 742.88  | -6.21424 | 2 K.M+15.99 chr4@1648    | 5.98E-11 | 0.002191 |
| 22Feb2011 | 21486 | 957.5   | 1.956888 | 3 R.FIEPIEDIF Splice@chr | 2.39E-10 | 0.006159 |
| 22Feb2011 | 22111 | 634.83  | -9.39461 | 2 R.VDIGDILF Splice@chr  | 2.33E-12 | 0        |
| 22Feb2011 | 23529 | 984.81  | -24.8852 | 3 K.SGTIFDNI Splice@chr  | 4.30E-10 | 0.009919 |
| 22Feb2011 | 10182 | 616.33  | -16.7632 | 2 K.LSKSVIFQ chr3@2798   | 4.32E-10 | 0.009919 |
| 22Feb2011 | 47    | 509.3   | -20.473  | 2 R.SSVIMLIV chr2@5767   | 3.32E-10 | 0.008062 |
| 22Feb2011 | 11563 | 747.56  | -7.71771 | 5 S.HLPRPGH Splice@chr   | 2.36E-10 | 0.006001 |
| 22Feb2011 | 11683 | 747.76  | -8.61645 | 5 S.HLPRPGH Splice@chr   | 3.90E-10 | 0.009153 |
| 22Feb2011 | 21532 | 957.5   | 22.57714 | 3 K.LFQVLQN Splice@chr   | 4.43E-12 | 0        |
| 22Feb2011 | 22061 | 634.83  | -9.39461 | 2 R.VDIGDILF Splice@chr  | 1.75E-13 | 0        |
| 22Feb2011 | 25919 | 828.38  | -20.1128 | 2 K.PNLK+14 chr2@3862    | 6.14E-12 | 0        |
| 22Feb2011 | 13929 | 454.25  | -15.7105 | 3 R.VLIRINGM Splice@chr  | 2.44E-10 | 0.006159 |
| 22Feb2011 | 23507 | 774.46  | 22.64844 | 2 K.WAELVVI chr3@1117    | 1.67E-10 | 0.004624 |
| 22Feb2011 | 5026  | 741.38  | -23.1647 | 2 K.FPENRHI chr2@1477    | 2.44E-10 | 0.006159 |
| 22Feb2011 | 23679 | 799.15  | -20.3276 | 4 K.SGTIFDNI Splice@chr  | 9.61E-11 | 0.003049 |

|           |       |         |          |                         |          |          |
|-----------|-------|---------|----------|-------------------------|----------|----------|
| 22Feb2011 | 23684 | 984.81  | -24.8852 | 3 K.SGTIFDNI Splice@chr | 3.64E-12 | 1.19E-04 |
| 22Feb2011 | 22119 | 984.81  | -24.8852 | 3 K.SGTIFDNI Splice@chr | 1.75E-10 | 0.004063 |
| 22Feb2011 | 24130 | 1147.24 | 4.705638 | 3 R.FQSAAIG Splice@chr  | 8.28E-11 | 0.002802 |
| 22Feb2011 | 5019  | 741.38  | -23.1647 | 2 K.FPENRHI chr2@1477   | 1.44E-10 | 0.003578 |
| 22Feb2011 | 12603 | 516.28  | -9.94989 | 2 K.VSVDVLE chrX@1218   | 8.43E-11 | 0.002802 |
| 22Feb2011 | 23220 | 984.82  | -14.7074 | 3 K.SGTIFDNI Splice@chr | 1.09E-10 | 0.003198 |
| 22Feb2011 | 14751 | 641.35  | -19.9207 | 2 K.RGK+14.1 Splice@chr | 2.40E-10 | 0.00493  |
| 22Feb2011 | 8438  | 450.25  | 28.36219 | 2 K.LLTDQTH chr5@1848   | 3.84E-10 | 0.006958 |
| 22Feb2011 | 12666 | 516.29  | 9.357636 | 2 K.VSVDVLE chrX@1218   | 2.37E-10 | 0.00493  |
| 22Feb2011 | 332   | 439.91  | -1.85417 | 3 K.VAGSGSL chr5@1747   | 3.59E-10 | 0.006576 |
| 22Feb2011 | 23647 | 984.81  | -24.8852 | 3 K.SGTIFDNI Splice@chr | 8.62E-12 | 3.28E-04 |
| 22Feb2011 | 23829 | 968.51  | -23.6218 | 3 R.FFYNIFAL chrX@4722  | 1.07E-10 | 0.003198 |
| 22Feb2011 | 6788  | 434.24  | 13.9946  | 3 _RSNDQTI chr5@6378    | 1.74E-11 | 5.24E-04 |
| 22Feb2011 | 17660 | 742.88  | -6.21424 | 2 K.M+15.99 chr4@1648   | 2.90E-10 | 0.005807 |
| 22Feb2011 | 14383 | 858.47  | -5.67211 | 3 _LETGIKPI Splice@chr  | 9.21E-14 | 0        |
| 22Feb2011 | 22126 | 795.65  | -23.4135 | 4 K.SGTIFDNI Splice@chr | 1.86E-14 | 0        |
| 22Feb2011 | 15176 | 622.33  | 9.587405 | 2 R.AK+14.01 chr2@4270  | 1.58E-10 | 0.003908 |
| 22Feb2011 | 20365 | 1003.18 | 7.145987 | 3 R.CWNRRA Splice@chr   | 3.23E-13 | 0        |
| 22Feb2011 | 22078 | 984.81  | -24.8852 | 3 K.SGTIFDNI Splice@chr | 7.49E-11 | 0.002455 |
| 22Feb2011 | 14741 | 938.46  | 22.50833 | 2 R.ECSQSDS chr2@8876   | 5.11E-10 | 0.009282 |
| 22Feb2011 | 23842 | 959.83  | -9.06276 | 3 K.GICDSLKI chrX@1654  | 1.23E-10 | 0.003268 |
| 22Feb2011 | 22374 | 984.81  | -24.8852 | 3 K.SGTIFDNI Splice@chr | 1.78E-12 | 0        |
| 22Feb2011 | 23274 | 795.65  | -15.5001 | 4 K.SGTIFDNI Splice@chr | 1.85E-14 | 0        |
| 22Feb2011 | 22513 | 795.65  | -15.5001 | 4 K.SGTIFDNI Splice@chr | 1.43E-14 | 0        |
| 22Feb2011 | 3311  | 460.72  | 10.9535  | 2 R.MGMDPI Splice@chr   | 2.09E-10 | 0.004464 |
| 22Feb2011 | 13637 | 623.03  | -18.2266 | 3 P.RNWGKG chrX@1446    | 4.16E-10 | 0.007417 |
| 22Feb2011 | 13796 | 484.61  | 1.222351 | 3 K.ISSAIAMF Splice@chr | 4.91E-11 | 0.00164  |
| 22Feb2011 | 24012 | 1147.24 | 4.705638 | 3 R.FQSAAIG Splice@chr  | 1.37E-16 | 0        |
| 22Feb2011 | 17768 | 742.88  | -6.21424 | 2 K.M+15.99 chr4@1648   | 1.11E-10 | 0.003198 |
| 22Feb2011 | 24206 | 581.95  | -26.8252 | 3 R.VKSEHQI chr4@1532   | 3.27E-10 | 0.006188 |
| 22Feb2011 | 19594 | 1003.19 | 17.13413 | 3 R.CWNRRA Splice@chr   | 4.93E-13 | 0        |
| 22Feb2011 | 22676 | 799.16  | -7.85909 | 4 K.SGTIFDNI Splice@chr | 3.39E-10 | 0.006497 |
| 22Feb2011 | 3373  | 460.72  | 10.9535  | 2 R.MGMDPI Splice@chr   | 5.37E-10 | 0.009677 |
| 22Feb2011 | 23947 | 1116.22 | 16.71106 | 3 K.QAFDDAI Splice@chr  | 1.84E-10 | 0.004063 |
| 22Feb2011 | 20548 | 1007.86 | 15.19559 | 3 R.CWNRRA Splice@chr   | 2.34E-11 | 7.05E-04 |
| 22Feb2011 | 436   | 439.91  | -1.85417 | 3 K.VAGSGSL chr5@1747   | 3.79E-10 | 0.006958 |
| 22Feb2011 | 20384 | 1007.85 | 5.172966 | 3 R.CWNRRA Splice@chr   | 4.88E-12 | 2.29E-04 |
| 22Feb2011 | 15371 | 490.74  | -7.60235 | 2 K.DITMEIM chr3@1481   | 4.59E-10 | 0.008615 |
| 22Feb2011 | 8675  | 724.35  | 19.12636 | 3 V.CLTEEGK Splice@chr  | 1.56E-13 | 0        |
| 22Feb2011 | 21178 | 634.84  | 6.410455 | 2 R.VDIGDILF Splice@chr | 1.15E-12 | 0        |
| 22Feb2011 | 15236 | 622.33  | 9.587405 | 2 R.AK+14.01 chr2@4270  | 3.85E-10 | 0.006958 |
| 22Feb2011 | 14188 | 833.93  | -9.2006  | 2 _IIEPYVAV Splice@chr  | 4.37E-10 | 0.008063 |
| 22Feb2011 | 24048 | 1147.24 | 4.705638 | 3 R.FQSAAIG Splice@chr  | 2.45E-16 | 0        |
| 22Feb2011 | 20416 | 1003.18 | 7.145987 | 3 R.CWNRRA Splice@chr   | 5.53E-14 | 0        |
| 22Feb2011 | 20417 | 649.9   | -9.68814 | 2 K.LKIITNLEI chr2@6716 | 1.59E-10 | 0.003908 |
| 22Feb2011 | 16698 | 760.38  | 11.14557 | 3 R.RAINGTE Splice@chr  | 4.89E-10 | 0.008823 |
| 22Feb2011 | 18336 | 931.53  | 0.362106 | 2 R.CTLLYISQ chr4@2818  | 1.70E-10 | 0.003908 |

|           |       |         |          |                          |          |          |
|-----------|-------|---------|----------|--------------------------|----------|----------|
| 22Feb2011 | 26441 | 723.36  | 12.94886 | 1 R.FQGGGEI chr1@2595    | 3.42E-10 | 0.006497 |
| 22Feb2011 | 6733  | 434.24  | 13.9946  | 3 _RSNDQTI chr5@6378     | 3.45E-10 | 0.006497 |
| 22Feb2011 | 7123  | 493.78  | -11.3951 | 2 R.KNQENLI Splice@chr   | 2.49E-10 | 0.005013 |
| 22Feb2011 | 21234 | 634.84  | 6.410455 | 2 R.VDIGDILF Splice@chr  | 5.90E-13 | 0        |
| 22Feb2011 | 21865 | 792.15  | -18.5783 | 4 K.SGTIFDNI Splice@chr  | 2.96E-18 | 0        |
| 22Feb2011 | 11044 | 521.95  | 5.936294 | 3 _AIFEQM+ chrX@4380     | 2.89E-10 | 0.005807 |
| 22Feb2011 | 460   | 439.91  | -1.85417 | 3 K.VAGSGSL chr5@1747    | 3.10E-10 | 0.00613  |
| 22Feb2011 | 14333 | 858.48  | 6.006088 | 3 _LETGIKPI Splice@chr   | 4.97E-12 | 2.29E-04 |
| 22Feb2011 | 21940 | 1055.86 | -22.4368 | 3 K.SGTIFDNI Splice@chr  | 1.44E-13 | 0        |
| 22Feb2011 | 11941 | 851.48  | -15.2578 | 2 K.RGVRLSH chr2@2785    | 5.81E-11 | 0.001728 |
| 22Feb2011 | 22167 | 1060.53 | -16.1915 | 3 K.SGTIFDNI Splice@chr  | 5.58E-13 | 0        |
| 22Feb2011 | 25339 | 760.4   | -4.0463  | 3 _TQTNTKI' chrX@7978    | 3.54E-10 | 0.006497 |
| 22Feb2011 | 17873 | 1060.15 | -15.5056 | 3 I.SRSAAMF Splice@chr   | 1.21E-19 | 0        |
| 22Feb2011 | 10801 | 747.56  | -7.71771 | 5 S.HLPRPGH Splice@chr   | 3.66E-10 | 0.006732 |
| 22Feb2011 | 7426  | 460.25  | -17.4268 | 2 K.YPGIGGI' Splice@chr  | 7.99E-11 | 0.002722 |
| 22Feb2011 | 16156 | 888.47  | 22.8338  | 2 K.DITLEVEA Splice@chr  | 1.68E-11 | 5.24E-04 |
| 22Feb2011 | 1749  | 833.4   | -14.0782 | 1 _RDEAQSK Splice@chr    | 4.91E-10 | 0.008823 |
| 22Feb2011 | 22507 | 774.46  | 22.64844 | 2 K.WAELVVI chr3@1117    | 5.05E-11 | 0.00164  |
| 22Feb2011 | 22174 | 795.65  | -23.4135 | 4 K.SGTIFDNI Splice@chr  | 1.29E-14 | 0        |
| 22Feb2011 | 19747 | 1003.19 | 17.13413 | 3 R.CWNRRA Splice@chr    | 4.72E-11 | 0.001465 |
| 22Feb2011 | 10747 | 747.57  | 5.690177 | 5 S.HLPRPGH Splice@chr   | 2.57E-10 | 0.005253 |
| 22Feb2011 | 23182 | 795.65  | -15.5001 | 4 K.SGTIFDNI Splice@chr  | 3.87E-15 | 0        |
| 22Feb2011 | 22284 | 795.65  | -15.5001 | 4 K.SGTIFDNI Splice@chr  | 2.73E-13 | 0        |
| 22Feb2011 | 22994 | 911.42  | 20.49399 | 2 _PRM+15. Splice@chr    | 4.23E-10 | 0.007656 |
| 22Feb2011 | 22330 | 984.81  | -24.8852 | 3 K.SGTIFDNI Splice@chr  | 5.72E-11 | 0.001728 |
| 22Feb2011 | 17824 | 1060.15 | -15.5056 | 3 I.SRSAAMF Splice@chr   | 2.42E-18 | 0        |
| 22Feb2011 | 20629 | 957.5   | 22.57714 | 3 K.LFQVLQN Splice@chr   | 2.35E-10 | 0.00493  |
| 22Feb2011 | 16112 | 792.42  | 5.26594  | 4 R.TTGVVLD chr2@1512    | 8.16E-12 | 3.28E-04 |
| 22Feb2011 | 14440 | 858.47  | -5.67211 | 3 _LETGIKPI Splice@chr   | 3.53E-13 | 0        |
| 22Feb2011 | 19718 | 873.47  | 13.68595 | 2 R.SIFVDLEP Splice@chr  | 1.44E-12 | 0        |
| 22Feb2011 | 20121 | 1007.86 | 15.19559 | 3 R.CWNRRA Splice@chr    | 5.67E-12 | 2.29E-04 |
| 22Feb2011 | 447   | 439.91  | -1.85417 | 3 K.VAGSGSL chr5@1747    | 9.02E-11 | 0.002968 |
| 22Feb2011 | 19413 | 1063.87 | -6.04876 | 3 K.SGDAGIV Splice@chr   | 4.78E-11 | 0.00156  |
| 22Feb2011 | 11999 | 851.48  | -15.2578 | 2 K.RGVRLSH chr2@2785    | 1.25E-10 | 0.003268 |
| 22Feb2011 | 25113 | 760.4   | -4.0463  | 3 _TQTNTKI' chrX@7978    | 4.19E-10 | 0.007417 |
| 22Feb2011 | 20465 | 649.9   | -9.68814 | 2 K.LKIITNLEI chr2@6716  | 7.51E-11 | 0.002455 |
| 22Feb2011 | 20660 | 754.09  | 18.40716 | 3 _TLLEALDS Splice@chr   | 5.55E-10 | 0.00989  |
| 22Feb2011 | 20668 | 957.5   | 22.57714 | 3 K.LFQVLQN Splice@chr   | 2.33E-11 | 7.05E-04 |
| 22Feb2011 | 16101 | 888.97  | 20.94366 | 2 K.DITLEVEA Splice@chr  | 9.99E-11 | 0.003124 |
| 22Feb2011 | 4720  | 526.78  | -3.83085 | 2 K.KLDLNM' chr2@7182    | 4.38E-11 | 0.001275 |
| 22Feb2011 | 22222 | 795.65  | -15.5001 | 4 K.SGTIFDNI Splice@chr  | 3.47E-14 | 0        |
| 22Feb2011 | 24082 | 1147.24 | 4.705638 | 3 R.FQSAAIG Splice@chr   | 5.96E-16 | 0        |
| 22Feb2011 | 23454 | 929.15  | -28.8338 | 3 R.KSTAKLK' chr2@8593   | 2.37E-10 | 0.00493  |
| 22Feb2011 | 20500 | 1007.85 | 5.172966 | 3 R.CWNRRA Splice@chr    | 5.58E-10 | 0.00989  |
| 22Feb2011 | 20713 | 957.5   | 22.57714 | 3 K.LFQVLQN Splice@chr   | 3.78E-10 | 0.006891 |
| 22Feb2011 | 21129 | 634.84  | 6.410455 | 2 R.VDIGDILF Splice@chr  | 4.19E-13 | 0        |
| 22Feb2011 | 21044 | 957.5   | 1.956888 | 3 R.FIEPIEDIF Splice@chr | 4.03E-10 | 0.009553 |

|           |       |         |          |                         |          |          |
|-----------|-------|---------|----------|-------------------------|----------|----------|
| 22Feb2011 | 24722 | 770.76  | -24.193  | 3 K.YLDAKCK chr4@3751   | 2.61E-10 | 0.005964 |
| 22Feb2011 | 18059 | 1059.81 | -20.7519 | 3 I.SRSAAMF Splice@chr  | 3.38E-16 | 0        |
| 22Feb2011 | 23562 | 795.65  | -23.4135 | 4 K.SGTIFDNI Splice@chr | 2.39E-15 | 0        |
| 22Feb2011 | 8642  | 724.35  | 19.12636 | 3 V.CLTEEGK Splice@chr  | 3.22E-10 | 0.007295 |
| 22Feb2011 | 24330 | 1147.25 | 13.44098 | 3 R.FQSAAIG Splice@chr  | 3.92E-13 | 0        |
| 22Feb2011 | 22656 | 795.66  | -10.8901 | 4 K.SGTIFDNI Splice@chr | 7.58E-14 | 0        |
| 22Feb2011 | 1029  | 439.74  | 18.7116  | 2 R.SIAMFGP chr2@4157   | 2.61E-10 | 0.005964 |
| 22Feb2011 | 22749 | 799.16  | -7.85909 | 4 K.SGTIFDNI Splice@chr | 2.33E-11 | 7.50E-04 |
| 22Feb2011 | 12354 | 833.42  | -4.62234 | 1 K.HEVTVFT chr4@1317   | 1.67E-10 | 0.004019 |
| 22Feb2011 | 16232 | 916.53  | 4.866717 | 1 K.FPGDVLL chr1@1206   | 1.35E-10 | 0.003427 |
| 22Feb2011 | 13316 | 924.9   | -24.4218 | 2 Q.KPDDISN Splice@chr  | 2.16E-10 | 0.005226 |
| 22Feb2011 | 1681  | 419.21  | 29.38476 | 3 K.NVSMEM chr2@1445    | 1.94E-10 | 0.004793 |
| 22Feb2011 | 4414  | 526.78  | -3.83085 | 2 K.KLDLNM chr2@7182    | 4.47E-11 | 9.27E-04 |
| 22Feb2011 | 5815  | 493.28  | 9.299081 | 2 R.EPKNATC chr2@1056   | 4.20E-10 | 0.009964 |
| 22Feb2011 | 14000 | 484.27  | -10.2722 | 3 K.ISSAIAMF chr4@7544  | 3.62E-11 | 8.35E-04 |
| 22Feb2011 | 20862 | 1007.85 | 5.172966 | 3 R.CWNRRA Splice@chr   | 2.44E-12 | 1.30E-04 |
| 22Feb2011 | 10813 | 897.42  | -27.6753 | 3 _QVREMH Splice@chr    | 2.64E-10 | 0.005964 |
| 22Feb2011 | 19883 | 762.13  | -4.55161 | 4 K.SGDAGIV Splice@chr  | 5.38E-11 | 0.001219 |
| 22Feb2011 | 20705 | 1008.18 | 0.829193 | 3 R.CWNRRA Splice@chr   | 8.74E-11 | 0.002658 |
| 22Feb2011 | 23026 | 799.16  | -7.85909 | 4 K.SGTIFDNI Splice@chr | 2.90E-11 | 7.50E-04 |
| 22Feb2011 | 15496 | 622.33  | 9.587405 | 2 R.AK+14.01 chr2@4270  | 2.98E-10 | 0.006705 |
| 22Feb2011 | 24008 | 984.82  | -14.7074 | 3 K.SGTIFDNI Splice@chr | 2.13E-11 | 7.50E-04 |
| 22Feb2011 | 22631 | 968.13  | 18.26018 | 3 _GCSIVPIS Splice@chr  | 6.25E-11 | 0.001611 |
| 22Feb2011 | 24298 | 688.75  | 8.895763 | 5 R.FQSAAIG Splice@chr  | 2.79E-10 | 0.006285 |
| 22Feb2011 | 17901 | 742.88  | -6.21424 | 2 K.M+15.99 chr4@1648   | 3.17E-10 | 0.007219 |
| 22Feb2011 | 23428 | 911.42  | 20.49399 | 2 _PRM+15. Splice@chr   | 2.27E-10 | 0.005567 |
| 22Feb2011 | 22770 | 984.82  | -14.7074 | 3 K.SGTIFDNI Splice@chr | 3.08E-11 | 8.35E-04 |
| 22Feb2011 | 7663  | 1089.65 | -29.1532 | 1 K.KLKSMKN chr5@3701   | 1.22E-10 | 0.003244 |
| 22Feb2011 | 14952 | 516.3   | 4.106203 | 3 R.NIIFLMVI chrX@1294  | 3.82E-10 | 0.009061 |
| 22Feb2011 | 12761 | 554.26  | 6.682444 | 2 R.M+15.99 Splice@chr  | 4.51E-11 | 9.27E-04 |
| 22Feb2011 | 2324  | 412.23  | 25.3069  | 2 R.IASYQGG chrX@1679   | 1.78E-10 | 0.004092 |
| 22Feb2011 | 15047 | 938.46  | 22.50833 | 2 R.ECSQSDS chr2@8876   | 2.62E-10 | 0.005964 |
| 22Feb2011 | 14646 | 858.47  | -5.67211 | 3 _LETGIKPI Splice@chr  | 8.61E-14 | 0        |
| 22Feb2011 | 6697  | 434.24  | 13.9946  | 3 _RSNDQTI chr5@6378    | 4.22E-11 | 9.27E-04 |
| 22Feb2011 | 2539  | 460.72  | 10.9535  | 2 R.MGMDPI Splice@chr   | 1.56E-10 | 0.003763 |
| 22Feb2011 | 21008 | 957.5   | 22.57714 | 3 K.LFQVLQN Splice@chr  | 1.84E-11 | 7.50E-04 |
| 22Feb2011 | 19040 | 672.59  | -4.41756 | 5 R.KVSNVQ chr5@8812    | 2.95E-10 | 0.00662  |
| 22Feb2011 | 17240 | 635.34  | 18.57072 | 2 K.NCLKAEN chr2@3509   | 3.45E-10 | 0.007979 |
| 22Feb2011 | 12152 | 851.48  | -15.2578 | 2 K.RGVRLSH chr2@2785   | 2.94E-10 | 0.00662  |
| 22Feb2011 | 20765 | 1003.18 | 7.145987 | 3 R.CWNRRA Splice@chr   | 5.01E-12 | 2.48E-04 |
| 22Feb2011 | 24288 | 1147.25 | 13.44098 | 3 R.FQSAAIG Splice@chr  | 7.40E-13 | 0        |
| 22Feb2011 | 14381 | 833.93  | -9.2006  | 2 _IIEPYVAV Splice@chr  | 2.48E-10 | 0.005964 |
| 22Feb2011 | 22449 | 795.65  | -23.4135 | 4 K.SGTIFDNI Splice@chr | 2.19E-10 | 0.0054   |
| 22Feb2011 | 20137 | 1007.86 | 15.19559 | 3 R.CWNRRA Splice@chr   | 1.84E-10 | 0.004268 |
| 22Feb2011 | 23989 | 799.16  | -7.85909 | 4 K.SGTIFDNI Splice@chr | 5.52E-12 | 3.66E-04 |
| 22Feb2011 | 20709 | 1003.18 | 7.145987 | 3 R.CWNRRA Splice@chr   | 5.49E-11 | 0.001219 |
| 22Feb2011 | 14706 | 858.47  | -5.67211 | 3 _LETGIKPI Splice@chr  | 1.19E-11 | 5.78E-04 |

|           |       |         |          |                         |          |          |
|-----------|-------|---------|----------|-------------------------|----------|----------|
| 22Feb2011 | 2301  | 574.77  | -16.2754 | 2 K.IMADSIT chr4@4334   | 5.15E-11 | 0.001219 |
| 22Feb2011 | 21541 | 634.84  | 6.410455 | 2 R.VDIGDILF Splice@chr | 9.28E-12 | 5.78E-04 |
| 22Feb2011 | 23772 | 929.15  | -28.8338 | 3 R.KSTAKLK chr2@8595   | 3.68E-10 | 0.008559 |
| 22Feb2011 | 15617 | 490.74  | -7.60235 | 2 K.DITMEIM chr3@1481   | 2.80E-10 | 0.006285 |
| 22Feb2011 | 22490 | 795.65  | -23.4135 | 4 K.SGTIFDNI Splice@chr | 3.84E-14 | 0        |
| 22Feb2011 | 18005 | 1059.81 | -20.7519 | 3 I.SRSAAMF Splice@chr  | 9.47E-19 | 0        |
| 22Feb2011 | 4795  | 741.38  | -23.1647 | 2 K.FPENRHI chr2@1477   | 3.69E-10 | 0.008559 |
| 22Feb2011 | 7683  | 1025.61 | -11.6755 | 1 K.LGLGSGL chr5@4945   | 2.46E-11 | 7.50E-04 |
| 22Feb2011 | 19424 | 1063.87 | -6.04876 | 3 K.SGDAGIV Splice@chr  | 3.31E-10 | 0.007552 |
| 22Feb2011 | 4740  | 741.38  | -23.1647 | 2 K.FPENRHI chr2@1477   | 2.26E-10 | 0.005486 |
| 22Feb2011 | 19716 | 1007.86 | 15.19559 | 3 R.CWNRRA Splice@chr   | 2.53E-10 | 0.005964 |
| 22Feb2011 | 22822 | 795.65  | -23.4135 | 4 K.SGTIFDNI Splice@chr | 1.74E-15 | 0        |
| 22Feb2011 | 7738  | 1025.61 | -11.6755 | 1 K.LGLGSGL chr5@4945   | 1.13E-11 | 5.78E-04 |
| 22Feb2011 | 13893 | 623.03  | -18.2266 | 3 P.RNWGKC chrX@1446    | 1.74E-10 | 0.004092 |
| 22Feb2011 | 23659 | 795.65  | -15.5001 | 4 K.SGTIFDNI Splice@chr | 6.47E-16 | 0        |
| 22Feb2011 | 2780  | 488.28  | 18.24649 | 2 K.INAEFVG chr4@4515   | 2.04E-10 | 0.004963 |
| 22Feb2011 | 21593 | 634.84  | 6.410455 | 2 R.VDIGDILF Splice@chr | 3.82E-13 | 0        |
| 22Feb2011 | 22286 | 795.65  | -15.5001 | 4 K.SGTIFDNI Splice@chr | 4.39E-14 | 0        |
| 22Feb2011 | 20263 | 582.65  | 15.01592 | 3 R.SIFVDLEP Splice@chr | 5.11E-12 | 2.48E-04 |
| 22Feb2011 | 21491 | 634.84  | 6.410455 | 2 R.VDIGDILF Splice@chr | 4.82E-13 | 0        |
| 22Feb2011 | 19758 | 1003.19 | 17.13413 | 3 R.CWNRRA Splice@chr   | 6.06E-12 | 3.66E-04 |
| 22Feb2011 | 10974 | 747.56  | -7.71771 | 5 S.HLPRPGH Splice@chr  | 2.37E-10 | 0.005742 |
| 22Feb2011 | 10565 | 703.86  | -3.21304 | 2 Y.VVQVAID chr1@1045   | 4.06E-11 | 7.02E-04 |
| 22Feb2011 | 23339 | 968.13  | 18.26018 | 3 _GCSIVPIS Splice@chr  | 9.34E-11 | 0.002363 |
| 22Feb2011 | 21269 | 1007.85 | 5.172966 | 3 R.CWNRRA Splice@chr   | 2.21E-10 | 0.00449  |
| 22Feb2011 | 5913  | 493.28  | 9.299081 | 2 R.EPKNATC chr2@1056   | 3.31E-10 | 0.007009 |
| 22Feb2011 | 6453  | 424.71  | 0.936339 | 2 K.TENSVNC Splice@chr  | 7.83E-11 | 0.001631 |
| 22Feb2011 | 23406 | 984.81  | -24.8852 | 3 K.SGTIFDNI Splice@chr | 5.50E-11 | 9.87E-04 |
| 22Feb2011 | 25162 | 1062.61 | 3.365979 | 2 E.EYFFRNL chrX@1001   | 3.86E-10 | 0.00812  |
| 22Feb2011 | 11403 | 747.76  | -8.61645 | 5 S.HLPRPGH Splice@chr  | 7.56E-11 | 0.001443 |
| 22Feb2011 | 22965 | 795.65  | -15.5001 | 4 K.SGTIFDNI Splice@chr | 3.43E-13 | 0        |
| 22Feb2011 | 7874  | 1025.61 | -11.6755 | 1 K.LGLGSGL chr5@4945   | 3.19E-11 | 7.02E-04 |
| 22Feb2011 | 1477  | 412.56  | -22.1132 | 3 _NPRGKKC Splice@chr   | 2.83E-10 | 0.006061 |
| 22Feb2011 | 21022 | 762.13  | -4.55161 | 4 K.SGDAGIV Splice@chr  | 6.66E-11 | 0.001166 |
| 22Feb2011 | 23629 | 795.65  | -23.4135 | 4 K.SGTIFDNI Splice@chr | 8.02E-15 | 0        |
| 22Feb2011 | 23187 | 795.65  | -23.4135 | 4 K.SGTIFDNI Splice@chr | 4.37E-13 | 0        |
| 22Feb2011 | 1779  | 412.56  | -22.1132 | 3 _NPRGKKC Splice@chr   | 1.46E-10 | 0.00282  |
| 22Feb2011 | 19556 | 747.41  | 11.74382 | 2 V.EK+14.01 chrX@6705  | 2.25E-10 | 0.00449  |
| 22Feb2011 | 15652 | 622.33  | 9.587405 | 2 R.AK+14.01 chr2@4270  | 2.40E-10 | 0.004642 |
| 22Feb2011 | 20464 | 1003.52 | 12.6889  | 3 R.CWNRRA Splice@chr   | 6.64E-12 | 2.21E-04 |
| 22Feb2011 | 11339 | 747.56  | -7.71771 | 5 S.HLPRPGH Splice@chr  | 2.84E-10 | 0.006061 |
| 22Feb2011 | 20988 | 1007.86 | 15.19559 | 3 R.CWNRRA Splice@chr   | 9.16E-11 | 0.002363 |
| 22Feb2011 | 15596 | 622.33  | 9.587405 | 2 R.AK+14.01 chr2@4270  | 2.32E-10 | 0.004565 |
| 22Feb2011 | 25136 | 1147.24 | 4.705638 | 3 R.FQSAAIG Splice@chr  | 3.26E-16 | 0        |
| 22Feb2011 | 6871  | 434.24  | 13.9946  | 3 _RSNDQTI chr5@6378    | 1.57E-10 | 0.002986 |
| 22Feb2011 | 21215 | 1007.85 | 5.172966 | 3 R.CWNRRA Splice@chr   | 1.93E-10 | 0.003744 |
| 22Feb2011 | 22200 | 634.83  | -9.39461 | 2 R.VDIGDILF Splice@chr | 2.05E-12 | 0        |

|           |       |         |          |                         |          |          |
|-----------|-------|---------|----------|-------------------------|----------|----------|
| 22Feb2011 | 25965 | 828.38  | -20.1128 | 2 K.PNLK+14 chr2@3862   | 2.71E-10 | 0.00582  |
| 22Feb2011 | 6930  | 434.24  | 13.9946  | 3 _RSNDQTI chr5@6378    | 4.35E-11 | 7.02E-04 |
| 22Feb2011 | 27234 | 736.05  | -13.3738 | 3 K.NVLNVAI chrX@2592   | 5.26E-12 | 2.21E-04 |
| 22Feb2011 | 12545 | 662.35  | -4.61447 | 2 S.INM+15.5 chr4@2551  | 3.09E-10 | 0.006539 |
| 22Feb2011 | 23242 | 795.65  | -23.4135 | 4 K.SGTIFDNI Splice@chr | 5.75E-16 | 0        |
| 22Feb2011 | 17577 | 722.45  | -4.95112 | 2 R.RK+14.01 Splice@chr | 4.80E-10 | 0.009895 |
| 22Feb2011 | 20023 | 672.59  | -4.41756 | 5 R.KVSNVQI chr5@8812   | 5.57E-12 | 2.21E-04 |
| 22Feb2011 | 2167  | 440.24  | -12.0041 | 3 K.VAGSGSL chr5@1747   | 1.78E-11 | 3.19E-04 |
| 22Feb2011 | 12427 | 851.48  | -15.2578 | 2 K.RGVRLSH chr2@2785   | 4.60E-10 | 0.009833 |
| 22Feb2011 | 23518 | 984.81  | -24.8852 | 3 K.SGTIFDNI Splice@chr | 3.26E-11 | 7.02E-04 |
| 22Feb2011 | 17632 | 722.45  | -4.95112 | 2 R.RK+14.01 Splice@chr | 3.04E-10 | 0.006286 |
| 22Feb2011 | 18439 | 630.74  | 22.20865 | 3 Y.QVALLGA chr3@6607   | 1.41E-12 | 0        |
| 22Feb2011 | 21324 | 1007.85 | 5.172966 | 3 R.CWNRRA Splice@chr   | 1.19E-10 | 0.002685 |
| 22Feb2011 | 18537 | 1059.82 | -11.3751 | 3 I.SRSAAMF Splice@chr  | 7.86E-15 | 0        |
| 22Feb2011 | 14338 | 887.93  | 29.43791 | 2 I.DEREESTA Splice@chr | 1.95E-10 | 0.003831 |
| 22Feb2011 | 23299 | 795.65  | -15.5001 | 4 K.SGTIFDNI Splice@chr | 1.18E-13 | 0        |
| 22Feb2011 | 14817 | 858.47  | -5.67211 | 3 _LETGIKPI Splice@chr  | 8.19E-13 | 0        |
| 22Feb2011 | 14998 | 858.48  | 6.006088 | 3 _LETGIKPI Splice@chr  | 2.10E-13 | 0        |
| 22Feb2011 | 21642 | 957.5   | 22.57714 | 3 K.LFQVLQN Splice@chr  | 5.45E-11 | 9.87E-04 |
| 22Feb2011 | 23139 | 795.65  | -15.5001 | 4 K.SGTIFDNI Splice@chr | 2.43E-13 | 0        |
| 22Feb2011 | 23148 | 984.48  | -20.3556 | 3 K.SGTIFDNI Splice@chr | 1.58E-11 | 3.19E-04 |
| 22Feb2011 | 13235 | 859.14  | 2.870693 | 3 _LRFKDNC chrX@1053    | 1.11E-10 | 0.002512 |
| 22Feb2011 | 8782  | 724.35  | 19.12636 | 3 V.CLTEEGK Splice@chr  | 3.21E-10 | 0.006768 |
| 22Feb2011 | 15244 | 938.46  | 22.50833 | 2 R.ECSQSDS chr2@8876   | 1.90E-10 | 0.003744 |
| 22Feb2011 | 24494 | 799.16  | -7.85909 | 4 K.SGTIFDNI Splice@chr | 1.66E-10 | 0.003242 |
| 22Feb2011 | 4542  | 756.42  | -22.2995 | 1 R.PLSAAAA chr5@3132   | 4.25E-10 | 0.009295 |
| 22Feb2011 | 20592 | 762.13  | -4.55161 | 4 K.SGDAGIV Splice@chr  | 3.59E-10 | 0.007645 |
| 22Feb2011 | 18239 | 742.88  | -6.21424 | 2 K.M+15.99 chr4@1648   | 4.38E-10 | 0.009369 |
| 22Feb2011 | 24336 | 795.65  | -15.5001 | 4 K.SGTIFDNI Splice@chr | 3.22E-16 | 0        |
| 22Feb2011 | 22931 | 980.47  | -17.2661 | 3 K.SGTIFDNI Splice@chr | 5.99E-11 | 0.001166 |
| 22Feb2011 | 21303 | 1003.18 | 7.145987 | 3 R.CWNRRA Splice@chr   | 4.02E-11 | 7.02E-04 |
| 22Feb2011 | 25175 | 1147.24 | 4.705638 | 3 R.FQSAAIG Splice@chr  | 7.95E-16 | 0        |
| 22Feb2011 | 4862  | 741.38  | -23.1647 | 2 K.FPENRHI chr2@1477   | 3.97E-10 | 0.008432 |
| 22Feb2011 | 14935 | 858.47  | -5.67211 | 3 _LETGIKPI Splice@chr  | 6.39E-14 | 0        |
| 22Feb2011 | 24912 | 968.51  | -23.6218 | 3 R.FFYNIFAL chrX@4722  | 9.62E-11 | 0.002421 |
| 22Feb2011 | 7860  | 1089.65 | -29.1532 | 1 K.KLKSMKN chr5@3701   | 1.22E-10 | 0.002746 |
| 22Feb2011 | 14875 | 858.47  | -5.67211 | 3 _LETGIKPI Splice@chr  | 2.95E-15 | 0        |
| 22Feb2011 | 21397 | 649.9   | -9.68814 | 2 K.LKIITNLEI chr2@6716 | 3.68E-10 | 0.007877 |
| 22Feb2011 | 23202 | 984.81  | -24.8852 | 3 K.SGTIFDNI Splice@chr | 9.17E-11 | 0.002363 |
| 22Feb2011 | 23285 | 968.13  | 18.26018 | 3 _GCSIVPIS Splice@chr  | 3.96E-10 | 0.008432 |
| 22Feb2011 | 22150 | 634.84  | 6.410455 | 2 R.VDIGDILF Splice@chr | 1.23E-12 | 0        |
| 22Feb2011 | 21414 | 897.45  | -3.04709 | 4 R.FWFFGKI chr2@7020   | 4.10E-10 | 0.008753 |
| 22Feb2011 | 20641 | 873.47  | 13.68595 | 2 R.SIFVDLEP Splice@chr | 3.31E-11 | 7.02E-04 |
| 22Feb2011 | 14611 | 833.93  | -9.2006  | 2 _IIEPYVAV Splice@chr  | 3.58E-10 | 0.007645 |
| 22Feb2011 | 21492 | 1007.86 | 15.19559 | 3 R.CWNRRA Splice@chr   | 3.27E-11 | 7.02E-04 |
| 22Feb2011 | 16506 | 571.64  | -12.8771 | 3 R.IAEEKK+1 chr1@2921  | 3.40E-10 | 0.007166 |
| 22Feb2011 | 24535 | 929.15  | -28.8338 | 3 R.KSTAKLK chr2@8593   | 3.56E-12 | 1.23E-04 |

|           |       |         |          |                         |          |          |
|-----------|-------|---------|----------|-------------------------|----------|----------|
| 22Feb2011 | 10435 | 829.89  | -16.1259 | 2 R.FEVFEIEC chr4@7295  | 2.22E-10 | 0.00449  |
| 22Feb2011 | 25657 | 713.68  | -6.48229 | 3 I.YSNTTNSI chr1@2335  | 9.92E-11 | 0.002421 |
| 22Feb2011 | 21361 | 1003.18 | 7.145987 | 3 R.CWNRRA Splice@chr   | 1.21E-12 | 0        |
| 22Feb2011 | 4807  | 741.38  | -23.1647 | 2 K.FPENRHI chr2@1477   | 3.35E-10 | 0.007084 |
| 22Feb2011 | 18482 | 1060.15 | -15.5056 | 3 I.SRSAAMF Splice@chr  | 6.76E-16 | 0        |
| 22Feb2011 | 16617 | 888.47  | 22.8338  | 2 K.DITLEVEA Splice@chr | 1.20E-11 | 2.21E-04 |
| 22Feb2011 | 4922  | 741.38  | -23.1647 | 2 K.FPENRHI chr2@1477   | 3.30E-10 | 0.007009 |
| 22Feb2011 | 23795 | 795.65  | -15.5001 | 4 K.SGTIFDNI Splice@chr | 2.65E-14 | 0        |
| 22Feb2011 | 1333  | 439.91  | -18.8195 | 3 R.NSYNGLP chr4@9687   | 1.34E-11 | 6.38E-04 |
| 22Feb2011 | 20865 | 1003.18 | 7.145987 | 3 R.CWNRRA Splice@chr   | 1.59E-11 | 6.38E-04 |
| 22Feb2011 | 12853 | 516.29  | 9.357636 | 2 K.VSVDVLE chrX@1218   | 1.46E-10 | 0.004201 |
| 22Feb2011 | 20778 | 1007.85 | 5.172966 | 3 R.CWNRRA Splice@chr   | 2.41E-10 | 0.006328 |
| 22Feb2011 | 24748 | 1147.24 | 4.705638 | 3 R.FQSAAIG Splice@chr  | 4.46E-17 | 0        |
| 22Feb2011 | 24502 | 968.51  | -23.6218 | 3 R.FFYNIFAL chrX@4722  | 4.86E-11 | 0.001398 |
| 22Feb2011 | 6925  | 533.82  | 16.26677 | 2 K.TNIYTILTI chr5@1325 | 2.87E-10 | 0.007716 |
| 22Feb2011 | 3768  | 450.77  | 18.59199 | 2 K.IEVDGVL chrX@1251   | 5.53E-11 | 0.001575 |
| 22Feb2011 | 1190  | 439.74  | 18.7116  | 2 R.SIAMFGP chr2@4157   | 2.34E-10 | 0.006093 |
| 22Feb2011 | 21707 | 634.84  | 6.410455 | 2 R.VDIGDILF Splice@chr | 5.61E-13 | 0        |
| 22Feb2011 | 23748 | 795.65  | -23.4135 | 4 K.SGTIFDNI Splice@chr | 4.39E-13 | 0        |
| 22Feb2011 | 16349 | 888.97  | 20.94366 | 2 K.DITLEVEA Splice@chr | 9.18E-11 | 0.003036 |
| 22Feb2011 | 22506 | 984.81  | -24.8852 | 3 K.SGTIFDNI Splice@chr | 1.02E-10 | 0.003478 |
| 22Feb2011 | 2486  | 574.77  | -16.2754 | 2 K.IMADSIT chr4@4334   | 3.39E-11 | 0.001028 |
| 22Feb2011 | 15068 | 938.46  | 22.50833 | 2 R.ECSQSDS chr2@8876   | 1.23E-10 | 0.004036 |
| 22Feb2011 | 8093  | 430.23  | -19.8571 | 2 R.GKRGGG chr1@5306    | 9.23E-12 | 4.53E-04 |
| 22Feb2011 | 20848 | 649.9   | -9.68814 | 2 K.LKIITNLEI chr2@6716 | 2.14E-10 | 0.005951 |
| 22Feb2011 | 23269 | 799.16  | -7.85909 | 4 K.SGTIFDNI Splice@chr | 7.10E-11 | 0.001941 |
| 22Feb2011 | 21640 | 634.84  | 6.410455 | 2 R.VDIGDILF Splice@chr | 2.31E-13 | 0        |
| 22Feb2011 | 23074 | 795.65  | -15.5001 | 4 K.SGTIFDNI Splice@chr | 1.20E-13 | 0        |
| 22Feb2011 | 11444 | 747.56  | -7.71771 | 5 S.HLPRPGH Splice@chr  | 1.07E-11 | 4.53E-04 |
| 22Feb2011 | 14689 | 858.48  | 6.006088 | 3 _LETGIKPI Splice@chr  | 2.21E-12 | 1.24E-04 |
| 22Feb2011 | 20353 | 582.65  | 15.01592 | 3 R.SIFVDLEP Splice@chr | 8.59E-12 | 4.53E-04 |
| 22Feb2011 | 20326 | 1007.86 | 15.19559 | 3 R.CWNRRA Splice@chr   | 8.87E-13 | 1.24E-04 |
| 22Feb2011 | 15671 | 490.74  | -7.60235 | 2 K.DITMEIM chr3@1481   | 3.18E-10 | 0.00834  |
| 22Feb2011 | 4663  | 756.42  | -22.2995 | 1 R.PLSAAAA chr5@3132   | 1.24E-10 | 0.004036 |
| 22Feb2011 | 20985 | 1008.19 | 10.77099 | 3 R.CWNRRA Splice@chr   | 2.25E-11 | 6.38E-04 |
| 22Feb2011 | 22675 | 795.65  | -23.4135 | 4 K.SGTIFDNI Splice@chr | 6.35E-13 | 0        |
| 22Feb2011 | 7197  | 527.95  | 11.73747 | 3 K.SVVSISSE chr4@1045  | 3.85E-10 | 0.009749 |
| 22Feb2011 | 21186 | 957.5   | 22.57714 | 3 K.LFQVLQN Splice@chr  | 2.40E-10 | 0.006328 |
| 22Feb2011 | 16327 | 792.42  | 5.26594  | 4 R.TTGVVLD chr2@1512   | 2.36E-10 | 0.00626  |
| 22Feb2011 | 24706 | 1147.24 | 4.705638 | 3 R.FQSAAIG Splice@chr  | 2.30E-16 | 0        |
| 22Feb2011 | 20132 | 873.47  | 13.68595 | 2 R.SIFVDLEP Splice@chr | 2.45E-12 | 1.24E-04 |
| 22Feb2011 | 20135 | 1003.18 | 7.145987 | 3 R.CWNRRA Splice@chr   | 2.31E-11 | 6.38E-04 |
| 22Feb2011 | 4849  | 741.38  | -23.1647 | 2 K.FPENRHI chr2@1477   | 3.36E-10 | 0.008649 |
| 22Feb2011 | 22623 | 795.65  | -15.5001 | 4 K.SGTIFDNI Splice@chr | 6.05E-14 | 0        |
| 22Feb2011 | 22803 | 795.65  | -23.4135 | 4 K.SGTIFDNI Splice@chr | 2.63E-12 | 1.24E-04 |
| 22Feb2011 | 14748 | 858.48  | 6.006088 | 3 _LETGIKPI Splice@chr  | 6.21E-14 | 0        |
| 22Feb2011 | 12285 | 851.48  | -15.2578 | 2 K.RGVRLSH chr2@2785   | 2.57E-10 | 0.006482 |

|           |       |         |          |                         |          |          |
|-----------|-------|---------|----------|-------------------------|----------|----------|
| 22Feb2011 | 23963 | 929.15  | -28.8338 | 3 R.KSTAKLK chr2@859    | 5.62E-11 | 0.001575 |
| 22Feb2011 | 15451 | 622.33  | 9.587405 | 2 R.AK+14.0 chr2@427    | 2.73E-10 | 0.006794 |
| 22Feb2011 | 22566 | 984.48  | -20.3556 | 3 K.SGTIFDNI Splice@chr | 1.93E-12 | 1.24E-04 |
| 22Feb2011 | 26627 | 736.05  | -13.3738 | 3 K.NVLNVA chrX@259     | 7.62E-11 | 0.002313 |
| 22Feb2011 | 18193 | 1060.15 | -15.5056 | 3 I.SRSAAMF Splice@chr  | 2.95E-17 | 0        |
| 22Feb2011 | 21587 | 634.84  | 6.410455 | 2 R.VDIGDILF Splice@chr | 2.31E-12 | 1.24E-04 |
| 22Feb2011 | 2608  | 447.74  | -24.0456 | 2 K.IIYDGSVK chrX@251   | 1.68E-10 | 0.004606 |
| 22Feb2011 | 21030 | 1007.85 | 5.172966 | 3 R.CWNRRA Splice@chr   | 1.88E-11 | 6.38E-04 |
| 22Feb2011 | 25013 | 598.63  | -4.42561 | 3 T.FQGVLDN Splice@chr  | 3.09E-10 | 0.008281 |
| 22Feb2011 | 2611  | 536.29  | -10.9462 | 2 _QVEFNPI Splice@chr   | 2.61E-10 | 0.006724 |
| 22Feb2011 | 20453 | 762.13  | -4.55161 | 4 K.SGDAGIV Splice@chr  | 1.33E-10 | 0.004036 |
| 22Feb2011 | 6472  | 693.87  | -6.6949  | 2 V.ICVAVGD chr5@106    | 1.46E-10 | 0.004201 |
| 22Feb2011 | 14253 | 887.93  | 29.43791 | 2 I.DEREESTN Splice@chr | 1.17E-10 | 0.003909 |
| 22Feb2011 | 22722 | 799.16  | -7.85909 | 4 K.SGTIFDNI Splice@chr | 6.35E-12 | 4.53E-04 |
| 22Feb2011 | 22726 | 795.65  | -23.4135 | 4 K.SGTIFDNI Splice@chr | 9.92E-16 | 0        |
| 22Feb2011 | 22882 | 984.81  | -24.8852 | 3 K.SGTIFDNI Splice@chr | 6.72E-11 | 0.001848 |
| 22Feb2011 | 14977 | 762.43  | 16.40509 | 2 _MK+14.0 chr4@774     | 2.10E-10 | 0.005951 |
| 22Feb2011 | 16029 | 1056.56 | 28.0642  | 3 I.SRVEDDS Splice@chr  | 2.56E-15 | 0        |
| 22Feb2011 | 16271 | 792.42  | 5.26594  | 4 R.TTGVVLD chr2@151    | 1.07E-10 | 0.00356  |
| 22Feb2011 | 22350 | 795.65  | -23.4135 | 4 K.SGTIFDNI Splice@chr | 3.52E-13 | 0        |
| 22Feb2011 | 19972 | 1007.86 | 15.19559 | 3 R.CWNRRA Splice@chr   | 2.79E-10 | 0.007309 |
| 22Feb2011 | 19974 | 1003.18 | 7.145987 | 3 R.CWNRRA Splice@chr   | 2.43E-12 | 1.24E-04 |
| 22Feb2011 | 14308 | 887.93  | 29.43791 | 2 I.DEREESTN chr5@992   | 3.59E-10 | 0.009135 |
| 22Feb2011 | 16412 | 888.97  | 20.94366 | 2 K.DITLEVEA Splice@chr | 1.19E-10 | 0.003909 |
| 22Feb2011 | 9796  | 616.33  | -16.7632 | 2 K.LSKSVIFQ chr3@279   | 3.85E-10 | 0.008402 |
| 22Feb2011 | 6565  | 434.24  | 13.9946  | 3 _RSNDQTI chr5@637     | 1.96E-10 | 0.004006 |
| 22Feb2011 | 22809 | 984.81  | -24.8852 | 3 K.SGTIFDNI Splice@chr | 4.49E-11 | 8.23E-04 |
| 22Feb2011 | 14567 | 858.47  | -5.67211 | 3 _LETGIKPI Splice@chr  | 2.57E-11 | 5.28E-04 |
| 22Feb2011 | 22994 | 774.96  | 20.47968 | 2 K.WAELVVI chr3@111    | 1.09E-10 | 0.002215 |
| 22Feb2011 | 18047 | 1059.81 | -20.7519 | 3 I.SRSAAMF Splice@chr  | 4.19E-17 | 0        |
| 22Feb2011 | 22630 | 795.65  | -15.5001 | 4 K.SGTIFDNI Splice@chr | 6.18E-14 | 0        |
| 22Feb2011 | 22636 | 984.81  | -24.8852 | 3 K.SGTIFDNI Splice@chr | 3.62E-11 | 5.28E-04 |
| 22Feb2011 | 16329 | 888.97  | 20.94366 | 2 K.DITLEVEA Splice@chr | 1.56E-12 | 0        |
| 22Feb2011 | 25260 | 828.38  | -20.1128 | 2 K.PNLK+14 chr2@386    | 4.80E-11 | 8.23E-04 |
| 22Feb2011 | 23021 | 795.65  | -23.4135 | 4 K.SGTIFDNI Splice@chr | 6.82E-14 | 0        |
| 22Feb2011 | 4376  | 756.42  | -22.2995 | 1 R.PLSAAAA chr5@313    | 2.86E-10 | 0.007052 |
| 22Feb2011 | 14761 | 762.42  | 3.25006  | 2 _MK+14.0 chr4@774     | 2.63E-10 | 0.006372 |
| 22Feb2011 | 24580 | 1147.24 | 4.705638 | 3 R.FQSAAIG Splice@chr  | 3.43E-14 | 0        |
| 22Feb2011 | 24624 | 1147.25 | 13.44098 | 3 R.FQSAAIG Splice@chr  | 4.03E-15 | 0        |
| 22Feb2011 | 20809 | 649.9   | -9.68814 | 2 K.LKIITNLEI chr2@671  | 3.89E-10 | 0.00848  |
| 22Feb2011 | 23883 | 962.46  | -26.3952 | 3 R.WFWGQI chr4@303     | 4.11E-10 | 0.00896  |
| 22Feb2011 | 4753  | 741.38  | -23.1647 | 2 K.FPENRHI chr2@147    | 2.97E-10 | 0.007291 |
| 22Feb2011 | 16272 | 888.97  | 20.94366 | 2 K.DITLEVEA Splice@chr | 4.24E-11 | 7.31E-04 |
| 22Feb2011 | 4814  | 437.23  | -20.8939 | 3 I.LVWGGG chrX@260     | 4.12E-10 | 0.00896  |
| 22Feb2011 | 8753  | 724.34  | 5.400383 | 3 V.CLTEEGK Splice@chr  | 1.89E-10 | 0.003734 |
| 22Feb2011 | 1427  | 460.72  | 10.9535  | 2 R.MGMDPI Splice@chr   | 3.58E-10 | 0.00816  |
| 22Feb2011 | 14885 | 938.46  | 22.50833 | 2 R.ECSQSDS chr2@887    | 1.35E-10 | 0.002775 |

|           |       |         |          |                          |          |          |
|-----------|-------|---------|----------|--------------------------|----------|----------|
| 22Feb2011 | 22948 | 774.46  | 22.64844 | 2 K.WAELVVI chr3@1117    | 1.73E-11 | 4.46E-04 |
| 22Feb2011 | 23225 | 799.16  | -7.85909 | 4 K.SGTIFDNI Splice@chr  | 7.15E-11 | 0.001305 |
| 22Feb2011 | 22681 | 795.65  | -15.5001 | 4 K.SGTIFDNI Splice@chr  | 2.30E-15 | 0        |
| 22Feb2011 | 24363 | 968.51  | -23.6218 | 3 R.FFYNIFAL chrX@4722   | 3.64E-10 | 0.00816  |
| 22Feb2011 | 20868 | 1008.19 | 10.77099 | 3 R.CWNRRA Splice@chr    | 6.30E-12 | 0        |
| 22Feb2011 | 5540  | 510.75  | 13.59037 | 2 K.TAGLCED chr2@1058    | 3.55E-10 | 0.008092 |
| 22Feb2011 | 14708 | 762.43  | 16.40509 | 2 _MK+14.0 chr4@7749     | 2.66E-10 | 0.00655  |
| 22Feb2011 | 23722 | 795.65  | -23.4135 | 4 K.SGTIFDNI Splice@chr  | 1.74E-16 | 0        |
| 22Feb2011 | 22439 | 792.15  | -18.5783 | 4 K.SGTIFDNI Splice@chr  | 9.59E-16 | 0        |
| 22Feb2011 | 20428 | 761.88  | -3.44933 | 4 K.SGDAGIV Splice@chr   | 1.53E-10 | 0.003219 |
| 22Feb2011 | 21096 | 957.5   | 1.956888 | 3 R.FIEPIEDIF Splice@chr | 1.33E-10 | 0.002775 |
| 22Feb2011 | 20323 | 582.65  | 15.01592 | 3 R.SIFVDLEP Splice@chr  | 1.57E-12 | 0        |
| 22Feb2011 | 14621 | 858.48  | 6.006088 | 3 _LETGIKPI Splice@chr   | 5.12E-15 | 0        |
| 22Feb2011 | 19909 | 762.13  | -4.55161 | 4 K.SGDAGIV Splice@chr   | 4.45E-10 | 0.009528 |
| 22Feb2011 | 20912 | 1007.85 | 5.172966 | 3 R.CWNRRA Splice@chr    | 1.67E-10 | 0.003482 |
| 22Feb2011 | 20711 | 1007.85 | 5.172966 | 3 R.CWNRRA Splice@chr    | 2.31E-11 | 5.28E-04 |
| 22Feb2011 | 21125 | 1008.19 | 10.77099 | 3 R.CWNRRA Splice@chr    | 3.55E-10 | 0.008092 |
| 22Feb2011 | 12094 | 851.49  | -3.4814  | 2 K.RGVRLSH chr2@2785    | 2.21E-10 | 0.004797 |
| 22Feb2011 | 15379 | 622.33  | 9.587405 | 2 R.AK+14.01 chr2@4270   | 1.49E-10 | 0.003219 |
| 22Feb2011 | 16188 | 792.42  | 5.26594  | 4 R.TTGVLVD chr2@1512    | 4.59E-11 | 8.23E-04 |
| 22Feb2011 | 15322 | 622.33  | 9.587405 | 2 R.AK+14.01 chr2@4270   | 1.63E-10 | 0.003395 |
| 22Feb2011 | 21048 | 957.5   | 22.57714 | 3 K.LFQVLQN Splice@chr   | 2.69E-10 | 0.006635 |
| 22Feb2011 | 14122 | 887.93  | 29.43791 | 2 I.DEREESTM Splice@chr  | 4.21E-10 | 0.009045 |
| 22Feb2011 | 22589 | 984.81  | -24.8852 | 3 K.SGTIFDNI Splice@chr  | 3.37E-11 | 5.28E-04 |
| 22Feb2011 | 22721 | 968.13  | 18.26018 | 3 _GCSIVPIS Splice@chr   | 8.26E-11 | 0.001888 |
| 22Feb2011 | 6646  | 574.81  | -4.78661 | 2 K.NGPNNQ chrX@1712     | 2.41E-10 | 0.00559  |
| 22Feb2011 | 20800 | 1003.18 | 7.145987 | 3 R.CWNRRA Splice@chr    | 2.07E-11 | 5.28E-04 |
| 22Feb2011 | 24144 | 799.16  | -7.85909 | 4 K.SGTIFDNI Splice@chr  | 8.72E-12 | 0        |
| 22Feb2011 | 15879 | 1056.56 | 28.0642  | 3 I.SRVEDDSI Splice@chr  | 7.43E-15 | 0        |
| 22Feb2011 | 22856 | 984.81  | -24.8852 | 3 K.SGTIFDNI Splice@chr  | 1.18E-11 | 1.15E-04 |
| 22Feb2011 | 17222 | 722.45  | -4.95112 | 2 R.RK+14.01 Splice@chr  | 2.52E-10 | 0.005753 |
| 22Feb2011 | 21530 | 634.83  | -9.39461 | 2 R.VDIGDILF Splice@chr  | 5.26E-13 | 0        |
| 22Feb2011 | 17920 | 742.88  | -6.21424 | 2 K.M+15.99 chr4@1648    | 3.30E-10 | 0.007511 |
| 22Feb2011 | 20746 | 1003.18 | 7.145987 | 3 R.CWNRRA Splice@chr    | 3.83E-13 | 0        |
| 22Feb2011 | 24544 | 1147.25 | 13.44098 | 3 R.FQSAAIG Splice@chr   | 8.34E-13 | 0        |
| 22Feb2011 | 14680 | 858.47  | -5.67211 | 3 _LETGIKPI Splice@chr   | 3.63E-15 | 0        |
| 22Feb2011 | 21579 | 634.83  | -9.39461 | 2 R.VDIGDILF Splice@chr  | 1.97E-12 | 0        |
| 22Feb2011 | 24172 | 984.81  | -24.8852 | 3 K.SGTIFDNI Splice@chr  | 1.19E-11 | 1.15E-04 |
| 22Feb2011 | 22733 | 795.65  | -23.4135 | 4 K.SGTIFDNI Splice@chr  | 1.02E-12 | 0        |
| 22Feb2011 | 4693  | 741.38  | -23.1647 | 2 K.FPENRHI chr2@1477    | 2.80E-10 | 0.006791 |
| 22Feb2011 | 22363 | 795.65  | -23.4135 | 4 K.SGTIFDNI Splice@chr  | 7.75E-13 | 0        |
| 22Feb2011 | 8561  | 606.3   | -17.646  | 2 R.MLNFLSC chr2@1612    | 1.06E-10 | 0.002215 |
| 22Feb2011 | 7574  | 1089.65 | -29.1532 | 1 K.KLKSMKN chr5@3701    | 1.23E-10 | 0.002215 |
| 22Feb2011 | 14429 | 833.93  | -9.2006  | 2 _IIEPYVAM Splice@chr   | 2.22E-10 | 0.004797 |
| 22Feb2011 | 22622 | 968.13  | 18.26018 | 3 _GCSIVPIS Splice@chr   | 4.29E-10 | 0.009363 |
| 22Feb2011 | 14183 | 887.93  | 29.43791 | 2 I.DEREESTM Splice@chr  | 2.05E-10 | 0.004545 |
| 22Feb2011 | 19523 | 1063.87 | -6.04876 | 3 K.SGDAGIV Splice@chr   | 2.95E-10 | 0.007213 |

|           |       |         |          |                         |          |          |
|-----------|-------|---------|----------|-------------------------|----------|----------|
| 22Feb2011 | 20766 | 1008.18 | 0.829193 | 3 R.CWNRRA Splice@chr   | 4.48E-12 | 0        |
| 22Feb2011 | 22310 | 795.65  | -23.4135 | 4 K.SGTIFDNI Splice@chr | 2.66E-12 | 0        |
| 22Feb2011 | 13302 | 547.8   | 19.42296 | 2 R.WIDCFLL chr2@2424   | 3.43E-10 | 0.007931 |
| 22Feb2011 | 10918 | 747.56  | -7.71771 | 5 S.HLPRPGH Splice@chr  | 2.83E-10 | 0.006964 |
| 22Feb2011 | 1412  | 584.8   | -10.4097 | 2 R.FSLKNTI chr4@2692   | 2.51E-11 | 5.28E-04 |
| 22Feb2011 | 12152 | 851.49  | -3.4814  | 2 K.RGVRLSH chr2@2785   | 7.39E-11 | 0.001404 |
| 22Feb2011 | 4638  | 741.38  | -23.1647 | 2 K.FPENRHI chr2@1477   | 1.93E-10 | 0.003821 |
| 22Feb2011 | 1495  | 584.3   | -7.53396 | 2 R.FSLKNTI chr4@2692   | 3.71E-11 | 5.28E-04 |
| 22Feb2011 | 6902  | 533.82  | 16.26677 | 2 K.TNIYTILTI chr5@1329 | 3.04E-10 | 0.007375 |
| 22Feb2011 | 11572 | 747.76  | -8.61645 | 5 S.HLPRPGH Splice@chr  | 4.14E-11 | 6.28E-04 |
| 22Feb2011 | 22789 | 795.4   | -22.3578 | 4 K.SGTIFDNI Splice@chr | 3.23E-13 | 0        |
| 22Feb2011 | 19822 | 1003.19 | 17.13413 | 3 R.CWNRRA Splice@chr   | 5.00E-11 | 8.23E-04 |
| 22Feb2011 | 14451 | 767.42  | 2.946597 | 2 K.QLDFLVD chr4@1393   | 4.41E-10 | 0.009449 |
| 22Feb2011 | 21007 | 957.5   | 22.57714 | 3 K.LFQVLQN Splice@chr  | 1.63E-11 | 4.46E-04 |
| 22Feb2011 | 20356 | 895.78  | -1.06827 | 3 _RELTEEDI Splice@chr  | 3.53E-10 | 0.008092 |
| 22Feb2011 | 4434  | 756.42  | -22.2995 | 1 R.PLSAAAA chr5@3132   | 1.59E-10 | 0.003395 |
| 22Feb2011 | 24317 | 968.18  | -19.0158 | 3 R.FFYNIFAL chrX@4722  | 3.41E-10 | 0.007857 |
| 22Feb2011 | 15934 | 1056.56 | 28.0642  | 3 I.SRVEDDS Splice@chr  | 2.75E-13 | 0        |
| 22Feb2011 | 14941 | 938.46  | 22.50833 | 2 R.ECSQSDS chr2@8876   | 3.22E-10 | 0.007511 |
| 22Feb2011 | 9917  | 616.33  | -16.7632 | 2 K.LSKSVIFQ chr3@2798  | 2.35E-10 | 0.005231 |
| 22Feb2011 | 404   | 418.89  | -10.5715 | 3 R.ENFATKC chr5@5231   | 1.31E-10 | 0.00362  |
| 22Feb2011 | 24049 | 980.47  | -17.2661 | 3 K.SGTIFDNI Splice@chr | 1.36E-11 | 9.18E-04 |
| 22Feb2011 | 1243  | 587.8   | 2.031861 | 2 Q.NAVEQE Splice@chr   | 1.34E-11 | 9.18E-04 |
| 22Feb2011 | 9271  | 560.94  | -12.2507 | 3 _EMFSAAI chr4@3419    | 2.45E-10 | 0.005009 |
| 22Feb2011 | 13914 | 1128.04 | -2.03078 | 2 _IPSAVGY Splice@chr   | 6.80E-11 | 0.002078 |
| 22Feb2011 | 7197  | 533.82  | 16.26677 | 2 K.TNIYTILTI chr5@1329 | 4.65E-10 | 0.00902  |
| 22Feb2011 | 23089 | 795.65  | -23.4135 | 4 K.SGTIFDNI Splice@chr | 1.76E-13 | 1.29E-04 |
| 22Feb2011 | 16554 | 888.97  | 20.94366 | 2 K.DITLEVEA Splice@chr | 2.74E-11 | 0.001163 |
| 22Feb2011 | 25283 | 1147.24 | 4.705638 | 3 R.FQSAAIG Splice@chr  | 1.85E-16 | 0        |
| 22Feb2011 | 12485 | 730.38  | -23.8587 | 3 K.DNVVNTI chr3@7825   | 2.51E-10 | 0.005163 |
| 22Feb2011 | 1333  | 587.3   | 4.892896 | 2 Q.NAVEQE Splice@chr   | 3.70E-11 | 0.001497 |
| 22Feb2011 | 371   | 735.33  | -27.5112 | 2 K.YGHANVI chr1@1065   | 3.65E-10 | 0.007255 |
| 22Feb2011 | 5426  | 460.25  | 8.040761 | 2 _ATDGSSII chr5@1148   | 1.80E-10 | 0.004448 |
| 22Feb2011 | 24013 | 911.42  | 20.49399 | 2 _PRM+15. Splice@chr   | 6.50E-11 | 0.001907 |
| 22Feb2011 | 16272 | 759.4   | -15.0495 | 2 K.FIDANLQ chr4@8206   | 9.30E-11 | 0.002556 |
| 22Feb2011 | 24794 | 984.81  | -24.8852 | 3 K.SGTIFDNI Splice@chr | 3.05E-11 | 0.00125  |
| 22Feb2011 | 19464 | 886.77  | -29.5706 | 3 G.FLFKSLC chr2@9496   | 2.37E-10 | 0.004929 |
| 22Feb2011 | 17591 | 635.34  | 18.57072 | 2 K.NCLKAEN chr2@3509   | 1.92E-10 | 0.004561 |
| 22Feb2011 | 1420  | 587.8   | 2.031861 | 2 Q.NAVEQE Splice@chr   | 3.84E-11 | 0.001497 |
| 22Feb2011 | 6938  | 434.24  | 13.9946  | 3 _RSNDQTI chr5@6378    | 4.85E-11 | 0.001665 |
| 22Feb2011 | 18749 | 831.95  | -16.4251 | 2 K.PM+15.9 chr3@1124   | 4.80E-11 | 0.001665 |
| 22Feb2011 | 15947 | 490.74  | -7.60235 | 2 K.DITMEIM chr3@1481   | 4.64E-10 | 0.00902  |
| 22Feb2011 | 14546 | 887.93  | 29.43791 | 2 I.DEREESTA Splice@chr | 4.47E-10 | 0.008811 |
| 22Feb2011 | 10950 | 897.42  | -27.6753 | 3 _QVREMH Splice@chr    | 3.52E-10 | 0.006956 |
| 22Feb2011 | 4296  | 526.78  | -3.83085 | 2 K.KLDLNM chr2@7182    | 4.43E-11 | 0.001497 |
| 22Feb2011 | 1754  | 536.29  | -10.9462 | 2 _QVEFNPI Splice@chr   | 3.63E-10 | 0.007255 |
| 22Feb2011 | 15417 | 938.46  | 22.50833 | 2 R.ECSQSDS chr2@8876   | 2.77E-10 | 0.005782 |

|           |       |         |          |                         |          |          |
|-----------|-------|---------|----------|-------------------------|----------|----------|
| 22Feb2011 | 7444  | 493.78  | -11.3951 | 2 R.KNQENLI Splice@chr  | 2.36E-10 | 0.004859 |
| 22Feb2011 | 2648  | 447.74  | -24.0456 | 2 K.IIYDGSVK chrX@2516  | 2.17E-10 | 0.004705 |
| 22Feb2011 | 24850 | 984.81  | -24.8852 | 3 K.SGTIFDNI Splice@chr | 7.45E-12 | 5.33E-04 |
| 22Feb2011 | 13066 | 516.28  | -9.94989 | 2 K.VSVDVLE chrX@1218   | 2.47E-10 | 0.005082 |
| 22Feb2011 | 20729 | 582.65  | 15.01592 | 3 R.SIFVDLEP Splice@chr | 1.57E-11 | 9.18E-04 |
| 22Feb2011 | 23197 | 795.65  | -23.4135 | 4 K.SGTIFDNI Splice@chr | 3.42E-12 | 2.26E-04 |
| 22Feb2011 | 18526 | 1059.82 | -11.3751 | 3 I.SRSAAMF Splice@chr  | 6.20E-18 | 0        |
| 22Feb2011 | 21995 | 634.83  | -9.39461 | 2 R.VDIGDILF Splice@chr | 3.04E-13 | 1.29E-04 |
| 22Feb2011 | 2615  | 536.29  | -10.9462 | 2 _QVEFNPII Splice@chr  | 4.47E-10 | 0.008811 |
| 22Feb2011 | 3206  | 536.29  | -10.9462 | 2 _QVEFNPII Splice@chr  | 3.86E-10 | 0.007547 |
| 22Feb2011 | 14761 | 833.93  | -9.2006  | 2 _IIEPYVAV Splice@chr  | 4.12E-11 | 0.001497 |
| 22Feb2011 | 3916  | 415.74  | -1.69243 | 2 R.LAELSAAI chr1@1418  | 1.69E-10 | 0.004297 |
| 22Feb2011 | 15021 | 599.28  | -28.7398 | 2 K.LCSTADT chrX@1481   | 9.65E-11 | 0.002639 |
| 22Feb2011 | 21171 | 897.45  | -3.04709 | 4 R.FWFFGKI chr2@7020   | 4.94E-10 | 0.009685 |
| 22Feb2011 | 21174 | 1007.85 | 5.172966 | 3 R.CWNRRA Splice@chr   | 7.25E-11 | 0.002159 |
| 22Feb2011 | 25054 | 968.17  | -29.3651 | 3 R.FFYNIFAL chrX@4722  | 4.07E-10 | 0.008    |
| 22Feb2011 | 23042 | 795.65  | -15.5001 | 4 K.SGTIFDNI Splice@chr | 5.11E-12 | 5.33E-04 |
| 22Feb2011 | 14817 | 833.93  | -9.2006  | 2 _IIEPYVAV Splice@chr  | 4.16E-10 | 0.008142 |
| 22Feb2011 | 23522 | 795.65  | -23.4135 | 4 K.SGTIFDNI Splice@chr | 2.35E-12 | 2.26E-04 |
| 22Feb2011 | 22101 | 634.83  | -9.39461 | 2 R.VDIGDILF Splice@chr | 2.78E-12 | 2.26E-04 |
| 22Feb2011 | 14604 | 887.93  | 29.43791 | 2 I.DEREESTA Splice@chr | 1.67E-10 | 0.004297 |
| 22Feb2011 | 15143 | 858.47  | -5.67211 | 3 _LETGIKPI Splice@chr  | 7.01E-12 | 5.33E-04 |
| 22Feb2011 | 7904  | 1089.65 | -29.1532 | 1 K.KLKSMKI chr5@3701   | 1.62E-10 | 0.004228 |
| 22Feb2011 | 17639 | 722.45  | -4.95112 | 2 R.RK+14.01 Splice@chr | 1.67E-10 | 0.004297 |
| 22Feb2011 | 1280  | 587.8   | 2.031861 | 2 Q.NAVEQE Splice@chr   | 4.72E-11 | 0.001665 |
| 22Feb2011 | 19219 | 661.39  | 17.1596  | 2 R.AFIIRM+ chrX@7389   | 2.93E-10 | 0.006146 |
| 22Feb2011 | 20332 | 1011.17 | 5.478214 | 3 R.CWNRRA Splice@chr   | 5.15E-10 | 0.009886 |
| 22Feb2011 | 24305 | 984.81  | -24.8852 | 3 K.SGTIFDNI Splice@chr | 2.23E-10 | 0.004705 |
| 22Feb2011 | 1119  | 587.8   | 2.031861 | 2 Q.NAVEQE Splice@chr   | 3.52E-11 | 0.001426 |
| 22Feb2011 | 11353 | 747.56  | -7.71771 | 5 S.HLPRPGH Splice@chr  | 4.14E-11 | 0.001497 |
| 22Feb2011 | 23119 | 1060.53 | -16.1915 | 3 K.SGTIFDNI Splice@chr | 2.74E-13 | 1.29E-04 |
| 22Feb2011 | 13123 | 554.26  | 6.682444 | 2 R.M+15.99 Splice@chr  | 2.09E-10 | 0.004561 |
| 22Feb2011 | 4866  | 741.38  | -23.1647 | 2 K.FPENRHI chr2@1477   | 2.76E-10 | 0.005782 |
| 22Feb2011 | 26206 | 828.38  | -20.1128 | 2 K.PNLK+14 chr2@3862   | 5.25E-11 | 0.001757 |
| 22Feb2011 | 16775 | 888.97  | 20.94366 | 2 K.DITLEVEA Splice@chr | 1.65E-13 | 1.29E-04 |
| 22Feb2011 | 15365 | 938.46  | 22.50833 | 2 R.ECSQSDS chr2@8876   | 1.54E-10 | 0.003992 |
| 22Feb2011 | 18743 | 554.3   | -28.4599 | 2 K.CLGLGYLI chr2@9237  | 4.21E-11 | 0.001497 |
| 22Feb2011 | 14883 | 833.93  | -9.2006  | 2 _IIEPYVAV Splice@chr  | 3.98E-10 | 0.007926 |
| 22Feb2011 | 859   | 439.73  | -4.03447 | 2 R.SIAMFGP chr2@4157   | 1.50E-10 | 0.003992 |
| 22Feb2011 | 15085 | 858.47  | -5.67211 | 3 _LETGIKPI Splice@chr  | 6.13E-13 | 1.29E-04 |
| 22Feb2011 | 21114 | 1003.18 | 7.145987 | 3 R.CWNRRA Splice@chr   | 1.04E-12 | 1.29E-04 |
| 22Feb2011 | 22043 | 634.83  | -9.39461 | 2 R.VDIGDILF Splice@chr | 2.80E-12 | 2.26E-04 |
| 22Feb2011 | 15831 | 622.33  | 9.587405 | 2 R.AK+14.01 chr2@4270  | 1.59E-10 | 0.004154 |
| 22Feb2011 | 1181  | 587.8   | 2.031861 | 2 Q.NAVEQE Splice@chr   | 1.90E-11 | 0.001087 |
| 22Feb2011 | 25307 | 860.68  | 2.433027 | 4 R.FQSAAIG Splice@chr  | 3.61E-12 | 2.26E-04 |
| 22Feb2011 | 14079 | 660.37  | -16.199  | 2 K.TK+14.01 chr1@1424  | 2.36E-10 | 0.004929 |
| 22Feb2011 | 21413 | 957.5   | 22.57714 | 3 K.LFQVLQN Splice@chr  | 2.39E-11 | 0.001163 |

|           |       |         |          |                          |          |          |
|-----------|-------|---------|----------|--------------------------|----------|----------|
| 22Feb2011 | 21167 | 1003.18 | 7.145987 | 3 R.CWNRRA Splice@chr    | 2.90E-12 | 2.26E-04 |
| 22Feb2011 | 1212  | 587.8   | 2.031861 | 2 Q.NAVEQE Splice@chr    | 3.30E-11 | 0.001342 |
| 22Feb2011 | 24294 | 795.65  | -15.5001 | 4 K.SGTIFDNI Splice@chr  | 7.24E-16 | 0        |
| 22Feb2011 | 22192 | 805.46  | -26.0992 | 2 K.TPIFIPAP: chr5@1861  | 2.01E-11 | 0.001087 |
| 22Feb2011 | 17974 | 988.04  | 8.32247  | 2 K.FDYFNMI chr4@1602    | 2.18E-10 | 0.004705 |
| 22Feb2011 | 16615 | 888.47  | 22.8338  | 2 K.DITLEVEA Splice@chr  | 3.44E-13 | 1.29E-04 |
| 22Feb2011 | 24396 | 917.5   | -4.96296 | 2 _..SIMSRLEI Splice@chr | 1.40E-10 | 0.003929 |
| 22Feb2011 | 15772 | 622.33  | 9.587405 | 2 R.AK+14.01 chr2@4270   | 3.60E-10 | 0.007035 |
| 22Feb2011 | 1153  | 587.3   | 4.892896 | 2 Q.NAVEQE Splice@chr    | 2.34E-11 | 0.001163 |
| 22Feb2011 | 16552 | 622.33  | 9.587405 | 2 R.AK+14.01 chr2@4270   | 1.42E-10 | 0.003605 |
| 22Feb2011 | 21589 | 897.45  | -3.04709 | 4 R.FWFFGKI chr2@7020    | 3.46E-10 | 0.007463 |
| 22Feb2011 | 21649 | 1003.18 | 7.145987 | 3 R.CWNRRA Splice@chr    | 2.33E-13 | 0        |
| 22Feb2011 | 3473  | 460.72  | 10.9535  | 2 R.MGMDPI Splice@chr    | 3.86E-10 | 0.008007 |
| 22Feb2011 | 17015 | 759.4   | -15.0495 | 2 K.FIDANLQ chr4@8206    | 6.56E-11 | 0.001771 |
| 22Feb2011 | 16158 | 938.46  | 22.50833 | 2 R.ECSQSDS chr2@8876    | 1.08E-10 | 0.002705 |
| 22Feb2011 | 22537 | 634.83  | -9.39461 | 2 R.VDIGDILF Splice@chr  | 3.91E-12 | 1.06E-04 |
| 22Feb2011 | 25257 | 984.81  | -24.8852 | 3 K.SGTIFDNI Splice@chr  | 1.31E-10 | 0.003316 |
| 22Feb2011 | 25491 | 968.51  | -23.6218 | 3 R.FFYNIFAL chrX@4722   | 2.23E-10 | 0.005358 |
| 22Feb2011 | 5441  | 741.38  | -23.1647 | 2 K.FPENRHI: chr2@1477   | 1.78E-10 | 0.00417  |
| 22Feb2011 | 3445  | 735.33  | -27.5112 | 2 K.YGHANVI chr1@1065    | 5.23E-10 | 0.009841 |
| 22Feb2011 | 23111 | 975.8   | -15.4281 | 3 K.SGTIFDNI Splice@chr  | 2.15E-10 | 0.005055 |
| 22Feb2011 | 23578 | 1060.53 | -16.1915 | 3 K.SGTIFDNI Splice@chr  | 1.02E-13 | 0        |
| 22Feb2011 | 20853 | 864.44  | 12.44142 | 2 R.KSSTLMR chr4@1655    | 2.97E-10 | 0.006702 |
| 22Feb2011 | 8478  | 1025.61 | -11.6755 | 1 K.LGLGSL chr5@4945     | 1.30E-11 | 3.68E-04 |
| 22Feb2011 | 18318 | 722.45  | -4.95112 | 2 R.RK+14.01 Splice@chr  | 2.91E-10 | 0.006702 |
| 22Feb2011 | 6642  | 463.23  | -11.7521 | 2 K.NTSEIFSK chr3@1171   | 2.59E-10 | 0.005986 |
| 22Feb2011 | 25703 | 1147.24 | 4.705638 | 3 R.FQSAAG Splice@chr    | 2.10E-16 | 0        |
| 22Feb2011 | 15523 | 833.93  | -9.2006  | 2 _..IIEPYVAV Splice@chr | 2.85E-10 | 0.006644 |
| 22Feb2011 | 18260 | 722.45  | -4.95112 | 2 R.RK+14.01 Splice@chr  | 2.58E-10 | 0.005986 |
| 22Feb2011 | 16219 | 938.46  | 22.50833 | 2 R.ECSQSDS chr2@8876    | 1.07E-10 | 0.002625 |
| 22Feb2011 | 26750 | 828.38  | -20.1128 | 2 K.PNLK+14 chr2@3862    | 2.78E-10 | 0.006644 |
| 22Feb2011 | 3331  | 735.33  | -27.5112 | 2 K.YGHANVI chr1@1065    | 4.26E-10 | 0.008466 |
| 22Feb2011 | 22424 | 634.83  | -9.39461 | 2 R.VDIGDILF Splice@chr  | 3.97E-12 | 1.06E-04 |
| 22Feb2011 | 15800 | 858.48  | 6.006088 | 3 _..LETGIKPI Splice@chr | 1.89E-10 | 0.004245 |
| 22Feb2011 | 4431  | 450.77  | 18.59199 | 2 K.IEVDGVL chrX@1251    | 8.26E-11 | 0.002004 |
| 22Feb2011 | 5496  | 741.38  | -23.1647 | 2 K.FPENRHI: chr2@1477   | 5.19E-10 | 0.009841 |
| 22Feb2011 | 21730 | 1007.85 | 5.172966 | 3 R.CWNRRA Splice@chr    | 9.84E-12 | 2.91E-04 |
| 22Feb2011 | 25730 | 1062.62 | 12.79939 | 2 E.EYFFRNLS chrX@1001   | 1.56E-10 | 0.003654 |
| 22Feb2011 | 25024 | 929.15  | -28.8338 | 3 R.KSTAKLK: chr2@8593   | 4.74E-10 | 0.009219 |
| 22Feb2011 | 6028  | 460.75  | 4.388206 | 2 _..ATDGSSII chr5@1148  | 1.01E-11 | 2.91E-04 |
| 22Feb2011 | 15209 | 887.93  | 29.43791 | 2 I.DEREESTA Splice@chr  | 3.73E-10 | 0.0078   |
| 22Feb2011 | 28450 | 795.47  | -12.9834 | 1 K.LMLPPPK Splice@chr   | 4.40E-10 | 0.008532 |
| 22Feb2011 | 18938 | 742.88  | -6.21424 | 2 K.M+15.99 chr4@1648    | 4.40E-11 | 0.001304 |
| 22Feb2011 | 18232 | 784.42  | -26.6807 | 3 _..LVK+14.0 Splice@chr | 3.64E-10 | 0.007732 |
| 22Feb2011 | 21875 | 957.5   | 22.57714 | 3 K.LFQVLQN Splice@chr   | 1.34E-10 | 0.003471 |
| 22Feb2011 | 18374 | 722.45  | -4.95112 | 2 R.RK+14.01 Splice@chr  | 2.56E-10 | 0.005986 |
| 22Feb2011 | 4250  | 412.56  | -22.1132 | 3 _..NPRGKKC Splice@chr  | 1.76E-10 | 0.00417  |

|           |       |         |          |                          |          |          |
|-----------|-------|---------|----------|--------------------------|----------|----------|
| 22Feb2011 | 28429 | 795.47  | -12.9834 | 1 K.LMLPPPK Splice@chr   | 3.53E-10 | 0.007533 |
| 22Feb2011 | 23616 | 795.65  | -15.5001 | 4 K.SGTIFDNI Splice@chr  | 2.89E-14 | 0        |
| 22Feb2011 | 17360 | 888.47  | 22.8338  | 2 K.DITLEVEA Splice@chr  | 4.03E-13 | 0        |
| 22Feb2011 | 22636 | 805.46  | -26.0992 | 2 K.TPIFIPAP: chr5@1861  | 7.00E-11 | 0.001771 |
| 22Feb2011 | 21228 | 1007.86 | 15.19559 | 3 R.CWNRRA Splice@chr    | 3.57E-11 | 7.98E-04 |
| 22Feb2011 | 15006 | 623.03  | -18.2266 | 3 P.RNWGKC chrX@1446     | 7.94E-11 | 0.001925 |
| 22Feb2011 | 1678  | 498.27  | 4.90972  | 2 R.RSAGGEF chr5@2885    | 4.37E-11 | 0.001304 |
| 22Feb2011 | 15465 | 833.93  | -9.2006  | 2 _..IIEPYVAV Splice@chr | 2.03E-10 | 0.004761 |
| 22Feb2011 | 8404  | 1089.65 | -29.1532 | 1 K.KLKSMKN chr5@3701    | 1.63E-10 | 0.003731 |
| 22Feb2011 | 18982 | 1060.14 | -25.0362 | 3 I.SRSAAMF Splice@chr   | 4.00E-17 | 0        |
| 22Feb2011 | 26499 | 770.76  | -24.193  | 3 K.YLDAKCK chr4@3751    | 5.13E-11 | 0.001624 |
| 22Feb2011 | 16976 | 1056.56 | 28.0642  | 3 I.SRVEDDS: Splice@chr  | 2.27E-14 | 0        |
| 22Feb2011 | 13744 | 516.28  | -9.94989 | 2 K.VSVDVLE chrX@1218    | 4.36E-12 | 2.02E-04 |
| 22Feb2011 | 8629  | 696.83  | -11.9803 | 2 R.TDRTESV chr1@1452    | 3.11E-10 | 0.00698  |
| 22Feb2011 | 3525  | 473.75  | -3.74414 | 2 R.RASENLE chr4@6738    | 1.07E-10 | 0.002625 |
| 22Feb2011 | 24833 | 795.65  | -15.5001 | 4 K.SGTIFDNI Splice@chr  | 1.85E-15 | 0        |
| 22Feb2011 | 23340 | 795.65  | -23.4135 | 4 K.SGTIFDNI Splice@chr  | 7.51E-13 | 0        |
| 22Feb2011 | 22585 | 805.46  | -26.0992 | 2 K.TPIFIPAP: chr5@1861  | 3.70E-10 | 0.007732 |
| 22Feb2011 | 15266 | 887.93  | 29.43791 | 2 I.DEREESTN Splice@chr  | 6.40E-11 | 0.001702 |
| 22Feb2011 | 15063 | 484.27  | -10.2722 | 3 K.ISSAIAMf chr4@7544   | 1.80E-11 | 3.68E-04 |
| 22Feb2011 | 23560 | 984.81  | -24.8852 | 3 K.SGTIFDNI Splice@chr  | 3.96E-11 | 0.00123  |
| 22Feb2011 | 20753 | 644.4   | -15.5206 | 2 K.KIISDFLP chr5@1401   | 3.95E-10 | 0.008219 |
| 22Feb2011 | 23517 | 795.65  | -23.4135 | 4 K.SGTIFDNI Splice@chr  | 9.29E-12 | 2.91E-04 |
| 22Feb2011 | 25607 | 1116.55 | 12.78935 | 3 K.QAFDDAI Splice@chr   | 5.65E-11 | 0.001624 |
| 22Feb2011 | 14877 | 1005.16 | -21.3951 | 3 L.LTTCNRRi Splice@chr  | 1.20E-11 | 3.68E-04 |
| 22Feb2011 | 7473  | 434.24  | 13.9946  | 3 _..RSNDQTI chr5@6378   | 1.29E-10 | 0.003316 |
| 22Feb2011 | 5017  | 430.75  | 0.781151 | 2 K.IMTTVGP Splice@chr   | 3.39E-10 | 0.0074   |
| 22Feb2011 | 15731 | 599.28  | -28.7398 | 2 K.LCSTADT: chrX@1481   | 1.53E-11 | 3.68E-04 |
| 22Feb2011 | 22480 | 634.83  | -9.39461 | 2 R.VDIGDILF Splice@chr  | 5.36E-13 | 0        |
| 22Feb2011 | 28473 | 795.47  | -12.9834 | 1 K.LMLPPPK Splice@chr   | 4.35E-10 | 0.008532 |
| 22Feb2011 | 1320  | 508.6   | 0.721467 | 3 R.LHFCLLPs chr2@3274   | 4.78E-10 | 0.009219 |
| 22Feb2011 | 14907 | 484.27  | -10.2722 | 3 K.ISSAIAMF Splice@chr  | 3.42E-11 | 0.001521 |
| 22Feb2011 | 26546 | 713.68  | -6.48229 | 3 I.YSNTTNSI chr1@2335   | 4.05E-10 | 0.008724 |
| 22Feb2011 | 19451 | 831.95  | -16.4251 | 2 K.PM+15.9 chr3@1124    | 1.89E-10 | 0.00445  |
| 22Feb2011 | 21465 | 694.87  | 2.550973 | 2 K.YHNITLQ chrX@3836    | 3.56E-10 | 0.007828 |
| 22Feb2011 | 16614 | 490.74  | -7.60235 | 2 K.DITMEIM chr3@1481    | 4.73E-10 | 0.009701 |
| 22Feb2011 | 15140 | 887.93  | 29.43791 | 2 I.DEREESTN Splice@chr  | 1.82E-10 | 0.00445  |
| 22Feb2011 | 26018 | 1147.24 | 4.705638 | 3 R.FQSAAIG Splice@chr   | 4.69E-16 | 0        |
| 22Feb2011 | 22771 | 634.83  | -9.39461 | 2 R.VDIGDILF Splice@chr  | 1.78E-13 | 0        |
| 22Feb2011 | 5789  | 741.38  | -23.1647 | 2 K.FPENRHI, chr2@1477   | 3.10E-10 | 0.006915 |
| 22Feb2011 | 12982 | 851.48  | -15.2578 | 2 K.RGVRLSH chr2@2785    | 4.12E-10 | 0.008724 |
| 22Feb2011 | 22835 | 634.84  | 6.410455 | 2 R.VDIGDILF Splice@chr  | 4.41E-12 | 3.18E-04 |
| 22Feb2011 | 18443 | 722.45  | -4.95112 | 2 R.RK+14.01 Splice@chr  | 2.03E-10 | 0.004745 |
| 22Feb2011 | 15660 | 858.47  | -5.67211 | 3 _..LETGIKPi Splice@chr | 4.88E-12 | 3.18E-04 |
| 22Feb2011 | 3455  | 735.33  | -27.5112 | 2 K.YGHANVI chr1@1065    | 3.99E-10 | 0.008599 |
| 22Feb2011 | 21887 | 897.45  | -3.04709 | 4 R.FWFFGKI chr2@7020    | 1.21E-10 | 0.003444 |
| 22Feb2011 | 21880 | 1007.85 | 5.172966 | 3 R.CWNRRA Splice@chr    | 1.40E-11 | 8.63E-04 |

|           |       |         |          |                          |          |          |
|-----------|-------|---------|----------|--------------------------|----------|----------|
| 22Feb2011 | 26895 | 828.38  | -20.1128 | 2 K.PNLK+14 chr2@3862    | 3.03E-10 | 0.006774 |
| 22Feb2011 | 19055 | 742.88  | -6.21424 | 2 K.M+15.99 chr4@1648    | 1.81E-10 | 0.00445  |
| 22Feb2011 | 23902 | 968.13  | 14.47345 | 3 _._CSIRPISG Splice@chr | 3.32E-10 | 0.007499 |
| 22Feb2011 | 564   | 833.4   | -14.0782 | 1 _._RDEAQSK Splice@chr  | 4.56E-10 | 0.009358 |
| 22Feb2011 | 26246 | 581.95  | -26.8252 | 3 R.VKSEHQN chr4@1532    | 4.44E-10 | 0.009213 |
| 22Feb2011 | 27678 | 769.88  | -19.0515 | 4 _._MSLIREK- chr3@1235  | 1.58E-10 | 0.004104 |
| 22Feb2011 | 7998  | 534.32  | 13.11853 | 2 K.TNIYTILTI chr5@1329  | 1.47E-10 | 0.003957 |
| 22Feb2011 | 6552  | 571.36  | 10.76628 | 2 R.KRKQGAI chr1@1385    | 1.13E-10 | 0.003294 |
| 22Feb2011 | 24957 | 606.63  | -14.6199 | 3 K.KCNEEGC chr3@1174    | 3.78E-10 | 0.008188 |
| 22Feb2011 | 21913 | 1003.18 | 7.145987 | 3 R.CWNRRRA Splice@chr   | 5.06E-13 | 0        |
| 22Feb2011 | 18995 | 742.88  | -6.21424 | 2 K.M+15.99 chr4@1648    | 2.14E-10 | 0.00504  |
| 22Feb2011 | 13629 | 554.26  | 6.682444 | 2 R.M+15.99 Splice@chr   | 7.80E-11 | 0.002366 |
| 22Feb2011 | 8517  | 1089.65 | -29.1532 | 1 K.KLKSMKN chr5@3701    | 8.12E-11 | 0.002366 |
| 22Feb2011 | 24826 | 911.42  | 20.49399 | 2 _._PRM+15. Splice@chr  | 1.60E-10 | 0.004175 |
| 22Feb2011 | 26015 | 688.75  | 8.895763 | 5 R.FQSAAIG Splice@chr   | 3.09E-10 | 0.006846 |
| 22Feb2011 | 18891 | 991.51  | 24.02083 | 3 _._IYVPADD Splice@chr  | 1.06E-15 | 0        |
| 22Feb2011 | 4361  | 412.56  | -22.1132 | 3 _._NPRGKKC Splice@chr  | 2.19E-10 | 0.005105 |
| 22Feb2011 | 16911 | 759.4   | -15.0495 | 2 K.FIDANLQ chr4@8206    | 3.62E-10 | 0.007828 |
| 22Feb2011 | 25060 | 795.65  | -15.5001 | 4 K.SGTIFDNI Splice@chr  | 4.88E-13 | 0        |
| 22Feb2011 | 581   | 833.4   | -14.0782 | 1 _._RDEAQSK Splice@chr  | 4.71E-10 | 0.009701 |
| 22Feb2011 | 9880  | 975.55  | -13.0268 | 1 K.LPKLDAYI chr4@1149   | 8.37E-11 | 0.002366 |
| 22Feb2011 | 15724 | 858.48  | 6.006088 | 3 _._LETGIKPI Splice@chr | 1.89E-10 | 0.00445  |
| 22Feb2011 | 9789  | 821.44  | 15.92055 | 1 K.TGFGING chrX@2647    | 2.67E-10 | 0.005968 |
| 22Feb2011 | 21425 | 582.65  | 15.01592 | 3 R.SIFVDLEP Splice@chr  | 1.69E-11 | 9.54E-04 |
| 22Feb2011 | 21997 | 1007.86 | 15.19559 | 3 R.CWNRRRA Splice@chr   | 5.52E-11 | 0.002    |
| 22Feb2011 | 25049 | 984.81  | -24.8852 | 3 K.SGTIFDNI Splice@chr  | 2.24E-10 | 0.005105 |
| 22Feb2011 | 26675 | 770.76  | -24.193  | 3 K.YLDAKCK chr4@3751    | 3.36E-10 | 0.007649 |
| 22Feb2011 | 23806 | 795.65  | -23.4135 | 4 K.SGTIFDNI Splice@chr  | 4.90E-13 | 0        |
| 22Feb2011 | 22247 | 957.5   | 1.956888 | 3 R.FIEPIEDIF Splice@chr | 1.23E-10 | 0.003524 |
| 22Feb2011 | 23655 | 763.14  | 20.21827 | 3 K.TK+14.01 chrX@1037   | 2.95E-10 | 0.006552 |
| 22Feb2011 | 24133 | 678.86  | -16.6575 | 2 K.QRSRPVIL chr5@8132   | 4.35E-10 | 0.00908  |
| 22Feb2011 | 9010  | 483.94  | 28.22667 | 3 R.ALLTNSM Splice@chr   | 5.04E-10 | 0.009887 |
| 22Feb2011 | 25983 | 1062.62 | 12.79939 | 2 E.EYFFRNL chrX@1001    | 1.06E-10 | 0.003152 |
| 22Feb2011 | 7554  | 434.24  | 13.9946  | 3 _._RSNDQTI chr5@6378   | 4.27E-10 | 0.009011 |
| 22Feb2011 | 19163 | 1060.15 | -15.5056 | 3 I.SRSAAMF Splice@chr   | 8.57E-16 | 0        |
| 22Feb2011 | 23754 | 795.65  | -15.5001 | 4 K.SGTIFDNI Splice@chr  | 8.86E-12 | 5.86E-04 |
| 22Feb2011 | 7713  | 404.22  | 20.84272 | 2 R.TSGGGG chr1@3738     | 6.84E-11 | 0.002319 |
| 22Feb2011 | 22878 | 805.46  | -26.0992 | 2 K.TPIFIPAP chr5@1861   | 3.80E-11 | 0.001575 |
| 22Feb2011 | 22389 | 646.34  | -14.6661 | 3 N.NDSDILF chr1@1264    | 4.67E-10 | 0.009637 |
| 22Feb2011 | 8611  | 1025.61 | -11.6755 | 1 K.LGLGSGL chr5@4945    | 4.88E-12 | 3.18E-04 |
| 22Feb2011 | 15955 | 938.46  | 22.50833 | 2 R.ECSQSDS chr2@8876    | 5.05E-10 | 0.009887 |
| 22Feb2011 | 6144  | 446.75  | 3.354779 | 2 R.IFSAGELF chr3@5608   | 3.41E-10 | 0.00779  |
| 22Feb2011 | 24811 | 980.48  | -7.04314 | 3 K.SGTIFDNI Splice@chr  | 2.27E-10 | 0.005257 |
| 22Feb2011 | 7851  | 533.82  | 16.26677 | 2 K.TNIYTILTI chr5@1329  | 1.56E-10 | 0.004104 |
| 22Feb2011 | 19116 | 742.88  | -6.21424 | 2 K.M+15.99 chr4@1648    | 1.40E-10 | 0.003957 |
| 22Feb2011 | 17637 | 902.54  | -28.5309 | 1 R.PFGVVVK chr2@1360    | 1.83E-10 | 0.00445  |
| 22Feb2011 | 23862 | 795.65  | -23.4135 | 4 K.SGTIFDNI Splice@chr  | 5.90E-13 | 0        |

|           |       |         |          |                          |          |          |
|-----------|-------|---------|----------|--------------------------|----------|----------|
| 22Feb2011 | 22717 | 634.84  | 6.410455 | 2 R.VDIGDILF Splice@chr  | 3.91E-13 | 0        |
| 22Feb2011 | 5733  | 741.38  | -23.1647 | 2 K.FPENRHI chr2@1477    | 3.38E-10 | 0.007721 |
| 22Feb2011 | 15307 | 833.93  | -9.2006  | 2 _..IIEPYVAV Splice@chr | 4.11E-10 | 0.008724 |
| 22Feb2011 | 1769  | 644.32  | -16.5669 | 2 R.M+15.99 chr5@1877    | 2.67E-10 | 0.005968 |
| 22Feb2011 | 24271 | 795.65  | -23.4135 | 4 K.SGTIFDNI Splice@chr  | 1.72E-12 | 1.12E-04 |
| 22Feb2011 | 18383 | 722.45  | -4.95112 | 2 R.RK+14.01 Splice@chr  | 3.42E-10 | 0.007828 |
| 22Feb2011 | 9956  | 560.94  | -12.2507 | 3 _..EMFSAA\ chr4@3419   | 4.88E-10 | 0.009819 |
| 22Feb2011 | 17401 | 888.47  | 22.8338  | 2 K.DITLEVEA Splice@chr  | 1.37E-12 | 0        |
| 22Feb2011 | 3865  | 488.28  | 18.24649 | 2 K.INAEFVG chr4@4519    | 3.13E-10 | 0.006915 |
| 22Feb2011 | 3862  | 411.7   | -22.8862 | 2 K.IYGGGGG chr4@1719    | 1.04E-14 | 0        |
| 22Feb2011 | 13575 | 554.26  | 6.682444 | 2 R.M+15.99 Splice@chr   | 6.62E-11 | 0.002319 |
| 22Feb2011 | 21861 | 1003.18 | 7.145987 | 3 R.CWNRRA Splice@chr    | 5.97E-13 | 0        |
| 22Feb2011 | 13643 | 516.29  | 9.357636 | 2 K.VSVDVLE chrX@1218    | 3.94E-11 | 0.001575 |
| 22Feb2011 | 8579  | 1089.65 | -29.1532 | 1 K.KLKSMKN chr5@3701    | 1.69E-10 | 0.004319 |
| 24Mar2011 | 3895  | 533.82  | 16.26677 | 2 K.TNIYTILTI chr5@1329  | 1.77E-10 | 0.001616 |
| 24Mar2011 | 9834  | 490.74  | -7.60235 | 2 K.DITMEIM chr3@1481    | 5.60E-10 | 0.007618 |
| 24Mar2011 | 2308  | 741.38  | -23.1647 | 2 K.FPENRHI chr2@1477    | 8.00E-11 | 7.77E-04 |
| 24Mar2011 | 11167 | 819.42  | -16.1831 | 2 K.LMFFLKI\ chr1@1469   | 4.10E-10 | 0.005488 |
| 24Mar2011 | 10074 | 1056.56 | 28.0642  | 3 I.SRVEDDS\ Splice@chr  | 8.29E-15 | 0        |
| 24Mar2011 | 10309 | 785.42  | 22.95449 | 1 _..MPAWAF chr2@1119    | 2.85E-11 | 0        |
| 24Mar2011 | 2264  | 741.38  | -23.1647 | 2 K.FPENRHI chr2@1477    | 1.65E-10 | 0.001476 |
| 24Mar2011 | 3818  | 493.78  | -11.3951 | 2 R.KNQENLI Splice@chr   | 3.71E-10 | 0.00425  |
| 24Mar2011 | 985   | 510.3   | 12.8833  | 2 R.RHVAYVF chr1@1479    | 1.23E-10 | 0.001204 |
| 24Mar2011 | 10157 | 1005.47 | -16.3827 | 2 K.KVELALW Splice@chr   | 2.20E-20 | 0        |
| 24Mar2011 | 2405  | 741.38  | -23.1647 | 2 K.FPENRHI chr2@1477    | 1.51E-10 | 0.001476 |
| 24Mar2011 | 9806  | 622.33  | 9.587405 | 2 R.AK+14.01 chr2@4270   | 3.77E-10 | 0.00467  |
| 24Mar2011 | 1338  | 510.3   | 12.8833  | 2 R.RHVAYVF chr1@1479    | 1.31E-11 | 0        |
| 24Mar2011 | 6596  | 825.96  | -15.1379 | 2 R.SARENKT Splice@chr   | 5.48E-11 | 4.74E-04 |
| 24Mar2011 | 10118 | 1005.47 | -16.3827 | 2 K.KVELALW Splice@chr   | 9.29E-23 | 0        |
| 24Mar2011 | 1127  | 510.3   | 12.8833  | 2 R.RHVAYVF chr1@1479    | 7.05E-11 | 6.25E-04 |
| 24Mar2011 | 9761  | 622.33  | 9.587405 | 2 R.AK+14.01 chr2@4270   | 4.60E-10 | 0.005877 |
| 24Mar2011 | 1211  | 510.3   | 12.8833  | 2 R.RHVAYVF chr1@1479    | 6.40E-11 | 6.25E-04 |
| 24Mar2011 | 10844 | 722.45  | -4.95112 | 2 R.RK+14.01 Splice@chr  | 6.25E-10 | 0.008266 |
| 24Mar2011 | 1168  | 510.3   | 12.8833  | 2 R.RHVAYVF chr1@1479    | 7.23E-11 | 6.25E-04 |
| 24Mar2011 | 6442  | 897.42  | -27.6753 | 3 _..QVREMH Splice@chr   | 6.66E-10 | 0.009056 |
| 24Mar2011 | 6761  | 1075.05 | -16.1169 | 2 R.TCSK+14. chr2@1253   | 1.21E-10 | 0.001204 |
| 24Mar2011 | 2614  | 936.48  | 27.86052 | 1 K.LNGGYEC chr2@1191    | 1.76E-11 | 0        |
| 24Mar2011 | 944   | 510.3   | 12.8833  | 2 R.RHVAYVF chr1@1479    | 6.54E-12 | 0        |
| 24Mar2011 | 9098  | 606.66  | -18.8783 | 3 I.NRFNISK chrX@1250    | 1.34E-10 | 0.001476 |
| 24Mar2011 | 9095  | 833.93  | -9.2006  | 2 _..IIEPYVAV Splice@chr | 4.70E-10 | 0.006154 |
| 24Mar2011 | 12903 | 968.12  | 7.825792 | 3 _..GCSIVPIS Splice@chr | 3.99E-11 | 0        |
| 24Mar2011 | 10798 | 722.45  | -4.95112 | 2 R.RK+14.01 Splice@chr  | 3.37E-10 | 0.003698 |
| 24Mar2011 | 3719  | 434.24  | 13.9946  | 3 _..RSNDQTI chr5@6378   | 9.75E-11 | 0.001204 |
| 24Mar2011 | 12009 | 1003.18 | 7.145987 | 3 R.CWNRRA Splice@chr    | 2.70E-12 | 0        |
| 24Mar2011 | 2289  | 531.29  | -6.73762 | 2 K.MPMGV\ chr2@6727     | 6.91E-10 | 0.009589 |
| 24Mar2011 | 11883 | 614.57  | 18.13825 | 4 K.QNSVQG Splice@chr    | 5.62E-10 | 0.007618 |
| 24Mar2011 | 11164 | 742.88  | -6.21424 | 2 K.M+15.99 chr4@1648    | 4.89E-10 | 0.006278 |

|           |       |         |          |                         |          |          |
|-----------|-------|---------|----------|-------------------------|----------|----------|
| 24Mar2011 | 1568  | 510.3   | 12.8833  | 2 R.RHVAYVF chr1@1479   | 6.54E-12 | 0        |
| 24Mar2011 | 12093 | 884.41  | -1.81927 | 3 R.YRVDLAF chr5@6435   | 5.66E-10 | 0.007618 |
| 24Mar2011 | 6192  | 830.39  | -18.1496 | 2 R.FEVFEIEC chr4@7295  | 4.35E-10 | 0.005742 |
| 24Mar2011 | 1003  | 447.73  | -5.60175 | 2 K.YLDENLK chr3@1259   | 6.15E-10 | 0.008139 |
| 24Mar2011 | 1092  | 510.3   | 12.8833  | 2 R.RHVAYVF chr1@1479   | 1.69E-10 | 0.001476 |
| 24Mar2011 | 1301  | 510.3   | 12.8833  | 2 R.RHVAYVF chr1@1479   | 6.40E-11 | 6.25E-04 |
| 22Feb2011 | 2480  | 603.34  | -2.98998 | 2 K.KMNISEK chr2@1509   | 2.40E-10 | 0.006234 |
| 22Feb2011 | 13255 | 701.35  | -14.7282 | 2 K.FPANRQ1 chr2@1240   | 1.87E-10 | 0.004224 |
| 22Feb2011 | 11728 | 684.35  | -5.67429 | 2 K.RLNKDID chrX@1486   | 3.03E-10 | 0.004431 |
| 22Feb2011 | 12230 | 684.35  | -5.67429 | 2 K.RLNKDID chrX@1486   | 5.59E-10 | 0.009222 |
| 22Feb2011 | 12904 | 684.35  | -5.67429 | 2 K.RLNKDID chrX@1486   | 4.32E-10 | 0.007841 |
| 22Feb2011 | 7607  | 479.23  | -21.6748 | 4 R.YAFAGPV chrX@1509   | 4.15E-11 | 0.001659 |
| 22Feb2011 | 21711 | 704.78  | 29.09756 | 5 R.FHGCPST chr4@1346   | 3.36E-10 | 0.007014 |
| 22Feb2011 | 24245 | 620.06  | 3.77365  | 4 R.NVGCCT\ chr5@5837   | 3.75E-10 | 0.00752  |
| 22Feb2011 | 2708  | 438.89  | -28.2483 | 3 K.MKGCISS chr4@8425   | 1.70E-10 | 0.004816 |
| 22Feb2011 | 6729  | 597.3   | 21.46428 | 2 R.IEVSVQD Splice@chr  | 4.06E-10 | 0.008896 |
| 22Feb2011 | 1324  | 506.62  | -8.17233 | 3 R.CIAARPLI chr2@1579  | 4.69E-10 | 0.009544 |
| 22Feb2011 | 5066  | 520.26  | 26.70185 | 3 _FSNAPMI chrX@4289    | 1.23E-10 | 0.00315  |
| 22Feb2011 | 4428  | 519.92  | 15.99676 | 3 _FSNAPMI chrX@4289    | 4.52E-11 | 8.12E-04 |
| 22Feb2011 | 3181  | 520.26  | 26.70185 | 3 _FSNAPMI chrX@4289    | 1.27E-11 | 2.14E-04 |
| 22Feb2011 | 4449  | 520.26  | 26.70185 | 3 _FSNAPMI chrX@4289    | 4.20E-10 | 0.009561 |
| 22Feb2011 | 8529  | 548.82  | 15.15283 | 2 R.KFFVLGE\ chr5@7773  | 1.86E-10 | 0.003734 |
| 22Feb2011 | 9520  | 548.82  | 15.15283 | 2 R.KFFVLGE\ chr5@7773  | 9.96E-11 | 0.003083 |
| 22Feb2011 | 6924  | 416.22  | 9.505929 | 3 R.SPEDSLRI Splice@chr | 3.47E-10 | 0.006814 |
| 22Feb2011 | 24741 | 823.08  | -15.3245 | 3 K.PNFSGFP chr3@2767   | 2.54E-10 | 0.004772 |
| 22Feb2011 | 26611 | 960.81  | -21.2669 | 3 K.WEKNKN chr3@9625    | 2.48E-10 | 0.005082 |
| 22Feb2011 | 23459 | 777.02  | 13.843   | 5 R.SSCFLAG\ chrX@1191  | 1.81E-10 | 0.004999 |
| 22Feb2011 | 27074 | 791.39  | -13.9459 | 2 K.RSCWKS\ chr5@1920   | 4.75E-10 | 0.008877 |
| 22Feb2011 | 27393 | 627.35  | -18.4171 | 2 R.SLMEIVLI chr3@5395  | 3.51E-10 | 0.007588 |
| 22Feb2011 | 24215 | 1165.91 | -29.75   | 3 K.NK+14.0\ chr4@8435  | 2.49E-10 | 0.003435 |
| 22Feb2011 | 11720 | 799.39  | -9.3694  | 2 R.M+15.99 Splice@chr  | 3.09E-10 | 0.007963 |
| 22Feb2011 | 9923  | 799.39  | -9.3694  | 2 R.M+15.99 Splice@chr  | 1.05E-10 | 0.002835 |
| 22Feb2011 | 15986 | 1153.62 | 26.19866 | 2 K.IFSQVDF\ chr3@1358  | 1.04E-10 | 0.003297 |
| 22Feb2011 | 17374 | 1153.62 | 26.19866 | 2 K.IFSQVDF\ chr3@1358  | 2.19E-10 | 0.004512 |
| 22Feb2011 | 24064 | 851.4   | -29.2626 | 2 R.TDQSMS\ chr2@6561   | 4.80E-10 | 0.009079 |
| 22Feb2011 | 27754 | 851.4   | -29.2626 | 2 R.TDQSMS\ chr2@6561   | 3.64E-10 | 0.007863 |
| 22Feb2011 | 16202 | 819.42  | 10.88844 | 2 K.LLCLNEN\ chr2@1674  | 2.90E-10 | 0.004271 |
| 22Feb2011 | 16180 | 819.42  | 10.88844 | 2 K.LLCLNEN\ chr2@1674  | 1.17E-10 | 0.003644 |
| 22Feb2011 | 17860 | 819.42  | 10.88844 | 2 K.LLCLNEN\ chr2@1674  | 2.07E-10 | 0.005072 |
| 22Feb2011 | 17664 | 819.42  | 10.88844 | 2 K.LLCLNEN\ chr2@1674  | 9.99E-11 | 0.002149 |
| 22Feb2011 | 2558  | 439.72  | 11.68651 | 2 K.VTSTGNC chr3@3986   | 3.07E-10 | 0.007123 |
| 22Feb2011 | 1987  | 439.72  | 11.68651 | 2 K.VTSTGNC chr3@3986   | 1.40E-11 | 4.07E-04 |
| 22Feb2011 | 26354 | 1008.07 | 11.39427 | 2 K.FQYFFQN chr1@1142   | 2.21E-10 | 0.005114 |
| 22Feb2011 | 26661 | 1008.07 | 11.39427 | 2 K.FQYFFQN chr1@1142   | 3.09E-10 | 0.006846 |
| 22Feb2011 | 10282 | 672.71  | 14.03196 | 3 R.LYRNTSK\ chrX@1435  | 2.98E-10 | 0.006208 |
| 22Feb2011 | 10997 | 575.3   | -15.3686 | 2 R.SSAAFAT Splice@chr  | 4.20E-10 | 0.009964 |
| 22Feb2011 | 5508  | 660.35  | 14.62624 | 3 R.K+14.016 chr5@8274  | 2.17E-10 | 0.004619 |

|           |       |         |          |                         |          |          |
|-----------|-------|---------|----------|-------------------------|----------|----------|
| 22Feb2011 | 4237  | 434.23  | 29.37655 | 3 R.VFISTPET Splice@chr | 2.06E-10 | 0.004561 |
| 22Feb2011 | 83    | 470.75  | -19.2947 | 2 R.HVDTELV chr1@1456   | 1.73E-10 | 0.003729 |
| 22Feb2011 | 62    | 470.75  | -19.2947 | 2 R.HVDTELV chr1@1456   | 1.47E-10 | 0.003344 |
| 22Feb2011 | 84    | 470.75  | -19.2947 | 2 R.HVDTELV chr1@1456   | 1.08E-10 | 0.003096 |
| 22Feb2011 | 52    | 470.75  | -19.2947 | 2 R.HVDTELV chr1@1456   | 4.80E-10 | 0.009808 |
| 22Feb2011 | 24542 | 1022.48 | -14.9619 | 3 R.AHQCAPi chr3@1495   | 1.52E-10 | 0.003649 |
| 24Mar2011 | 6948  | 673.89  | 2.811926 | 2 R.KPLK+14. Splice@chr | 5.67E-10 | 0.007755 |
| 22Feb2011 | 5267  | 552.34  | 29.33765 | 2 R.QVRRSSS Splice@chr  | 1.70E-10 | 0.003736 |
| 22Feb2011 | 7789  | 636.34  | -5.66799 | 2 R.RFRMYA chr2@3726    | 4.98E-10 | 0.008438 |
| 22Feb2011 | 24302 | 702.71  | 7.770413 | 3 _HSATIGT chr4@1652    | 8.85E-11 | 0.002527 |
| 22Feb2011 | 88    | 423.22  | 7.806321 | 2 _TLEEPEK. chr5@1436   | 3.18E-10 | 0.006499 |
| 22Feb2011 | 8560  | 423.22  | 7.806321 | 2 _TLEEPEK. chr5@1436   | 2.64E-10 | 0.004249 |
| 22Feb2011 | 8618  | 423.22  | 7.806321 | 2 _TLEEPEK. chr5@1436   | 2.57E-10 | 0.004084 |
| 22Feb2011 | 3231  | 870.5   | 23.37592 | 1 K.VKDGQA chrX@1198    | 7.44E-11 | 0.001443 |
| 22Feb2011 | 8177  | 503.3   | 18.77415 | 2 K.QFGAIAI chr5@1615   | 4.97E-10 | 0.007385 |
| 22Feb2011 | 9492  | 503.3   | 18.77415 | 2 K.QFGAIAI chr5@1615   | 2.04E-10 | 0.004761 |
| 22Feb2011 | 21227 | 855.4   | -18.3653 | 3 _LIHKGTS chr1@3087    | 1.22E-10 | 0.00309  |
| 22Feb2011 | 21255 | 855.4   | -18.3653 | 3 _LIHKGTS chr1@3087    | 3.38E-10 | 0.00767  |
| 22Feb2011 | 2346  | 537.26  | -1.40329 | 3 R.SM+15.9 chrX@1538   | 4.16E-10 | 0.008142 |
| 22Feb2011 | 17311 | 1055.47 | 4.707819 | 3 V.DNGSGM Splice@chr   | 2.27E-10 | 0.005243 |
| 22Feb2011 | 24728 | 825.74  | -22.777  | 3 R.FEKPPAR Splice@chr  | 4.41E-10 | 0.009409 |
| 22Feb2011 | 252   | 589.79  | 21.63454 | 2 K.YFFMIFF chr1@5696   | 2.42E-10 | 0.006159 |
| 22Feb2011 | 24847 | 809.47  | 26.87708 | 2 R.TKCLSLA chr5@1810   | 1.66E-10 | 0.004533 |
| 22Feb2011 | 19461 | 816.42  | 8.907456 | 2 R.DTRRKST chr1@1598   | 2.89E-10 | 0.006684 |
| 22Feb2011 | 12428 | 596.81  | -23.3562 | 2 K.LLSFTHT chr5@7521   | 4.42E-10 | 0.008386 |
| 22Feb2011 | 14872 | 633.85  | -28.5472 | 2 R.K+14.016 chr1@6257  | 4.69E-10 | 0.008681 |
| 22Feb2011 | 17261 | 650.85  | 13.24333 | 2 R.NVIEAVE. chr3@1051  | 1.50E-12 | 0        |
| 22Feb2011 | 17416 | 1024.54 | -14.4428 | 1 K.LPKFEDFI chr3@3075  | 1.50E-10 | 0.003558 |
| 22Feb2011 | 19357 | 896.7   | -23.7704 | 4 _LIPIHSAK chrX@6449   | 1.95E-10 | 0.004616 |
| 22Feb2011 | 20284 | 832.68  | 28.64996 | 4 R.K+14.016 Splice@chr | 1.92E-10 | 0.004417 |
| 22Feb2011 | 22392 | 892.95  | -3.67851 | 4 K.RIRKMKE chr2@1058   | 3.67E-10 | 0.00728  |
| 22Feb2011 | 22710 | 892.95  | -3.67851 | 4 K.RIRKMKE chr2@1058   | 3.36E-10 | 0.006507 |
| 22Feb2011 | 2325  | 460.23  | -12.4934 | 2 K.FSDPIANI chr1@1327  | 4.43E-10 | 0.009552 |
| 22Feb2011 | 9438  | 607.31  | 19.32861 | 2 R.LSVVCYTI chrX@1680  | 5.74E-10 | 0.00976  |
| 22Feb2011 | 23747 | 761.61  | 25.55093 | 5 _TATWKFS chr4@4975    | 3.67E-10 | 0.006139 |
| 22Feb2011 | 25657 | 742.91  | 6.66379  | 4 R.LVFASTG chr5@1505   | 3.51E-10 | 0.00591  |
| 22Feb2011 | 21603 | 585.6   | -14.7283 | 3 K.SSAVNM- Splice@chr  | 3.94E-10 | 0.008034 |
| 22Feb2011 | 19926 | 585.6   | -14.7283 | 3 K.SSAVNM- Splice@chr  | 2.62E-10 | 0.006106 |
| 22Feb2011 | 21415 | 585.26  | -24.1661 | 3 K.SSAVNM- Splice@chr  | 3.68E-10 | 0.008757 |
| 22Feb2011 | 22830 | 745.86  | -11.6831 | 2 K.FNSAACR Splice@chr  | 3.93E-10 | 0.007697 |
| 22Feb2011 | 20915 | 877.78  | 10.42372 | 3 K.NHDGCH chr5@9979    | 1.17E-10 | 0.00285  |
| 22Feb2011 | 19357 | 871.48  | -22.2032 | 2 R.QVAGKG chr5@5117    | 1.10E-10 | 0.001812 |
| 22Feb2011 | 16567 | 798.77  | -5.30452 | 3 K.TPTKISKK chr3@2874  | 2.99E-10 | 0.006496 |
| 22Feb2011 | 27192 | 531.76  | -6.20982 | 2 _QTLCCRP Splice@chr   | 5.73E-10 | 0.009509 |
| 22Feb2011 | 23771 | 597.29  | 1.740115 | 2 _MPM+15 chr5@1122     | 1.12E-10 | 0.001977 |
| 22Feb2011 | 5907  | 460.25  | 7.907855 | 2 _VGSSSV chr1@1195     | 1.98E-10 | 0.003911 |
| 22Feb2011 | 23737 | 809.47  | -25.4935 | 2 R.VLK+14.0 Splice@chr | 3.45E-10 | 0.007607 |

|           |       |         |          |                          |          |          |
|-----------|-------|---------|----------|--------------------------|----------|----------|
| 22Feb2011 | 19477 | 981.48  | -22.7418 | 3 R.RPSVRAS Splice@chr   | 4.41E-10 | 0.009517 |
| 22Feb2011 | 796   | 613.78  | -29.1834 | 2 R.MFTEEN\ chr1@1416    | 1.33E-10 | 0.003009 |
| 22Feb2011 | 4040  | 403.23  | 15.12037 | 2 R.WTTGALI Splice@chr   | 4.49E-10 | 0.007955 |
| 22Feb2011 | 18101 | 610.74  | -28.5081 | 5 _..KKRENGk Splice@chr  | 8.33E-11 | 0.00183  |
| 22Feb2011 | 24284 | 1182.92 | 11.72657 | 3 K.NMITGTS Splice@chr   | 2.50E-11 | 0.001011 |
| 22Feb2011 | 26214 | 1182.55 | -18.3896 | 3 K.NMITGTS Splice@chr   | 8.73E-14 | 0        |
| 22Feb2011 | 25804 | 1182.92 | 11.72657 | 3 K.NMITGTS Splice@chr   | 4.62E-10 | 0.008933 |
| 22Feb2011 | 16974 | 1182.55 | -18.3896 | 3 K.NMITGTS Splice@chr   | 7.66E-12 | 3.79E-04 |
| 22Feb2011 | 25668 | 1182.92 | 11.72657 | 3 K.NMITGTS Splice@chr   | 2.58E-12 | 2.38E-04 |
| 22Feb2011 | 25686 | 1182.55 | -18.3896 | 3 K.NMITGTS Splice@chr   | 6.36E-13 | 0        |
| 22Feb2011 | 25533 | 1182.92 | 11.72657 | 3 K.NMITGTS Splice@chr   | 3.41E-11 | 9.70E-04 |
| 22Feb2011 | 22636 | 1182.94 | 28.53207 | 3 K.NMITGTS Splice@chr   | 3.75E-10 | 0.008811 |
| 22Feb2011 | 26627 | 1182.92 | 11.72657 | 3 K.NMITGTS Splice@chr   | 2.41E-11 | 0.001182 |
| 22Feb2011 | 8329  | 411.58  | 13.57769 | 3 K.TIPLCFLI chr5@1001   | 3.11E-10 | 0.006744 |
| 22Feb2011 | 279   | 584.79  | -20.8736 | 2 K.M+15.99 chr5@1758    | 3.19E-10 | 0.006643 |
| 1Mar2011- | 2266  | 665.39  | -2.57228 | 2 _..KDPKGGF Splice@chr  | 2.55E-10 | 0.007048 |
| 22Feb2011 | 968   | 624.79  | -11.1544 | 2 R.DGEWDK Splice@chr    | 5.21E-11 | 0.001351 |
| 22Feb2011 | 993   | 624.79  | -11.1544 | 2 R.DGEWDK Splice@chr    | 2.80E-10 | 0.005602 |
| 22Feb2011 | 22572 | 885.46  | 1.28817  | 3 R.VAELLSDI chrX@5324   | 3.45E-10 | 0.007415 |
| 22Feb2011 | 24697 | 968.2   | -22.8719 | 3 K.CKKK+14.C Splice@chr | 5.46E-11 | 0.001535 |
| 22Feb2011 | 24802 | 968.2   | -22.8719 | 3 K.CKKK+14 Splice@chr   | 2.77E-10 | 0.006898 |
| 22Feb2011 | 24999 | 968.2   | -22.8719 | 3 K.CKKK+14 Splice@chr   | 5.27E-10 | 0.009189 |
| 22Feb2011 | 23664 | 968.2   | -22.8719 | 3 K.CKKK+14 Splice@chr   | 3.05E-10 | 0.005965 |
| 22Feb2011 | 24182 | 968.2   | -22.8719 | 3 K.CKKK+14 Splice@chr   | 7.05E-11 | 0.00121  |
| 22Feb2011 | 10764 | 717.41  | 19.99454 | 2 _..KIAYNSDI chr1@1627  | 3.12E-10 | 0.007447 |
| 22Feb2011 | 5170  | 474.27  | 11.83198 | 3 K.K+14.016 chr5@1677   | 1.53E-10 | 0.003344 |
| 22Feb2011 | 9039  | 589.36  | 8.048535 | 2 K.LQNSLYV chrX@1018    | 3.53E-10 | 0.007236 |
| 22Feb2011 | 5655  | 512.28  | 25.33595 | 2 _..SSEITSSR chr5@1362  | 2.18E-11 | 4.13E-04 |
| 22Feb2011 | 6806  | 512.28  | 25.33595 | 2 _..SSEITSSR chr5@1362  | 3.09E-10 | 0.006636 |
| 22Feb2011 | 6275  | 512.28  | 25.33595 | 2 _..SSEITSSR chr5@1362  | 1.58E-10 | 0.003499 |
| 22Feb2011 | 6217  | 512.28  | 25.33595 | 2 _..SSEITSSR chr5@1362  | 6.09E-11 | 0.001545 |
| 22Feb2011 | 6206  | 512.28  | 25.33595 | 2 _..SSEITSSR chr5@1362  | 3.82E-10 | 0.009624 |
| 22Feb2011 | 6259  | 512.28  | 25.33595 | 2 _..SSEITSSR chr5@1362  | 3.08E-11 | 9.88E-04 |
| 22Feb2011 | 5973  | 512.28  | 25.33595 | 2 _..SSEITSSR chr5@1362  | 4.23E-11 | 8.12E-04 |
| 22Feb2011 | 6704  | 512.28  | 25.33595 | 2 _..SSEITSSR chr5@1362  | 1.53E-11 | 2.14E-04 |
| 22Feb2011 | 6705  | 512.28  | 25.33595 | 2 _..SSEITSSR chr5@1362  | 2.61E-11 | 6.24E-04 |
| 22Feb2011 | 6725  | 512.28  | 25.33595 | 2 _..SSEITSSR chr5@1362  | 4.55E-10 | 0.008883 |
| 22Feb2011 | 27844 | 902.14  | -29.1564 | 3 K.PTEIK+14 chr4@3617   | 3.73E-10 | 0.007688 |
| 22Feb2011 | 22976 | 901.79  | 25.83903 | 3 _..RGKKGCF chrX@3554   | 2.62E-10 | 0.00601  |
| 22Feb2011 | 16732 | 540.32  | 1.161552 | 4 _..IPKQGKG chrX@7747   | 4.04E-10 | 0.007636 |
| 22Feb2011 | 6375  | 596.97  | 1.160699 | 3 _..SEGVWG chr5@5453    | 2.94E-10 | 0.005576 |
| 22Feb2011 | 2916  | 603.3   | -23.6798 | 2 K.TETGGAA Splice@chr   | 5.95E-10 | 0.008808 |
| 22Feb2011 | 23474 | 876.2   | 25.79157 | 3 K.LPK+14.0 chr2@2749   | 4.03E-10 | 0.008237 |
| 22Feb2011 | 16765 | 760.37  | -4.14071 | 2 K.FHKSGNM chr3@1215    | 3.71E-10 | 0.007532 |
| 22Feb2011 | 16244 | 743.4   | -2.54863 | 2 K.ECRLGTI chrX@1487    | 1.29E-10 | 0.003361 |
| 22Feb2011 | 23306 | 848.96  | 28.77492 | 2 K.LK+14.01 chr3@3997   | 3.62E-10 | 0.007822 |
| 22Feb2011 | 7085  | 542.3   | 11.27595 | 2 R.EEINK+14 chr4@1388   | 1.18E-10 | 0.002365 |

|           |       |        |          |                         |          |          |
|-----------|-------|--------|----------|-------------------------|----------|----------|
| 22Feb2011 | 17692 | 800.38 | -9.13986 | 3 R.TLVFAPM Splice@chr  | 4.38E-10 | 0.009008 |
| 22Feb2011 | 10754 | 632.81 | 2.467087 | 2 R.FM+15.9 chrX@8090   | 1.64E-10 | 0.004518 |
| 22Feb2011 | 10061 | 504.29 | -22.0306 | 2 R.RHVPQLT chr5@1255   | 1.40E-10 | 0.004142 |
| 22Feb2011 | 27777 | 795.47 | 1.871118 | 3 T.ITKLLILSI chr2@1210 | 4.67E-10 | 0.008933 |
| 22Feb2011 | 22522 | 734.41 | 20.92875 | 5 R.STLMRPT chr4@1418   | 1.77E-10 | 0.003956 |
| 22Feb2011 | 3342  | 418.24 | 13.91665 | 2 K.ISTTTSPK chr3@8470  | 4.17E-10 | 0.008342 |
| 22Feb2011 | 12469 | 733.39 | -25.7507 | 2 A.LNNSAGI chrX@5984   | 3.14E-10 | 0.006026 |
| 22Feb2011 | 25176 | 991.54 | -15.5276 | 3 K.NMEKSLI chr3@1084   | 1.73E-10 | 0.003057 |
| 22Feb2011 | 22811 | 812.19 | -25.1186 | 4 _NERK+14 Splice@chr   | 2.51E-10 | 0.005221 |
| 22Feb2011 | 687   | 477.77 | 13.31427 | 2 R.APHMGV chrX@2850    | 5.00E-10 | 0.007385 |
| 22Feb2011 | 673   | 477.77 | 13.31427 | 2 R.APHMGV chrX@2850    | 4.15E-11 | 8.00E-04 |
| 22Feb2011 | 1133  | 477.77 | 13.31427 | 2 R.APHMGV chrX@2850    | 5.99E-10 | 0.009922 |
| 22Feb2011 | 1201  | 477.77 | 13.31427 | 2 R.APHMGV chrX@2850    | 3.77E-10 | 0.007241 |
| 22Feb2011 | 892   | 477.77 | 13.31427 | 2 R.APHMGV chrX@2850    | 2.75E-10 | 0.006087 |
| 22Feb2011 | 27216 | 477.77 | 13.31427 | 2 R.APHMGV chrX@2850    | 3.23E-10 | 0.006439 |
| 22Feb2011 | 27085 | 477.77 | 13.31427 | 2 R.APHMGV chrX@2850    | 1.90E-10 | 0.004561 |
| 22Feb2011 | 23155 | 1082.9 | 18.75546 | 3 K.IFKIYASN chr4@1455  | 2.11E-10 | 0.003539 |
| 22Feb2011 | 3709  | 734.36 | -11.5685 | 1 _ETSGNVK chr3@1248    | 2.38E-10 | 0.007342 |
| 22Feb2011 | 20995 | 557.27 | -23.2609 | 3 _TIQSSQLC chr3@5432   | 2.00E-10 | 0.006662 |
| 22Feb2011 | 24582 | 721.85 | 27.80478 | 4 R.FGEVFDV Splice@chr  | 4.78E-10 | 0.009219 |
| 22Feb2011 | 3026  | 533.29 | -0.45867 | 2 K.TLTCKISS Splice@chr | 7.64E-11 | 0.002056 |
| 22Feb2011 | 9812  | 438.76 | -1.67261 | 2 R.IIFAGGA/ chr3@7095  | 1.37E-11 | 6.69E-04 |
| 22Feb2011 | 9438  | 438.76 | -1.67261 | 2 R.IIFAGGA/ chr3@7095  | 6.57E-12 | 2.39E-04 |
| 22Feb2011 | 9049  | 438.76 | -1.67261 | 2 R.IIFAGGA/ chr3@7095  | 3.75E-12 | 3.04E-04 |
| 22Feb2011 | 4921  | 408.75 | -2.61958 | 2 R.LKSGGVC chr4@4115   | 4.62E-10 | 0.009617 |
| 22Feb2011 | 22968 | 788.91 | -19.7258 | 2 R.RICCSPLV Splice@chr | 1.62E-10 | 0.003358 |
| 22Feb2011 | 18764 | 676.6  | -19.7687 | 4 K.WSLQSVI Splice@chr  | 3.56E-17 | 0        |
| 22Feb2011 | 19676 | 676.6  | -19.7687 | 4 K.WSLQSVI Splice@chr  | 8.34E-16 | 0        |
| 22Feb2011 | 19372 | 676.6  | -19.7687 | 4 K.WSLQSVI Splice@chr  | 3.19E-17 | 0        |
| 22Feb2011 | 22573 | 855.73 | 2.596399 | 3 K.ARSDYGS Splice@chr  | 2.62E-10 | 0.004648 |
| 22Feb2011 | 9271  | 572.3  | 19.19635 | 2 R.IDVAGFN chr3@4257   | 1.05E-11 | 4.42E-04 |
| 22Feb2011 | 17499 | 890.44 | -22.0845 | 4 _GFQNaN Splice@chr    | 3.08E-10 | 0.00656  |
| 22Feb2011 | 17692 | 890.44 | -22.0845 | 4 _GFQNaN Splice@chr    | 4.21E-10 | 0.008232 |
| 22Feb2011 | 25132 | 663.82 | -28.796  | 2 K.K+14.016 chr2@1192  | 2.75E-11 | 6.43E-04 |
| 22Feb2011 | 12765 | 593.34 | 16.89919 | 3 K.IVMNITV chr3@5742   | 1.52E-10 | 0.003413 |
| 22Feb2011 | 12202 | 593.34 | 16.89919 | 3 K.IVMNITV chr3@5742   | 2.36E-10 | 0.004152 |
| 22Feb2011 | 8599  | 630.36 | 20.17244 | 2 R.K+14.016 chr3@1178  | 1.94E-10 | 0.002602 |
| 22Feb2011 | 5566  | 522.26 | -27.8674 | 2 K.IFGTSYDI chrX@8710  | 2.73E-10 | 0.006733 |
| 22Feb2011 | 1569  | 599.35 | -13.0149 | 2 R.FVSVFIAC chr2@1415  | 4.08E-10 | 0.007616 |
| 22Feb2011 | 27518 | 859.44 | -10.902  | 3 K.CLDAMLI chr3@1022   | 1.80E-10 | 0.004694 |
| 22Feb2011 | 7132  | 460.25 | -17.4268 | 2 R.TPVVYSP chr4@3274   | 3.45E-10 | 0.006441 |
| 22Feb2011 | 8947  | 442.78 | 23.07322 | 2 R.LSKPGGL Splice@chr  | 4.03E-10 | 0.008031 |
| 22Feb2011 | 8762  | 442.78 | 23.07322 | 2 R.LSKPGGL Splice@chr  | 6.04E-11 | 0.001814 |
| 22Feb2011 | 7029  | 533.3  | 10.89327 | 2 R.RPSPEKSI chr4@1710  | 2.36E-11 | 4.13E-04 |
| 22Feb2011 | 25657 | 743.43 | 23.05832 | 3 R.TK+14.01 chr1@1821  | 2.67E-10 | 0.005968 |
| 22Feb2011 | 24473 | 927.45 | -2.60255 | 2 K.EETGCMI chr4@6498   | 4.31E-11 | 5.81E-04 |
| 22Feb2011 | 19285 | 795.44 | -10.3385 | 2 R.DSRIVFDI chr5@1244  | 1.11E-10 | 0.003924 |

|           |       |         |          |                         |          |          |
|-----------|-------|---------|----------|-------------------------|----------|----------|
| 22Feb2011 | 10924 | 481.26  | -1.90634 | 2 K.INVGGTC chr3@772    | 2.86E-10 | 0.007269 |
| 22Feb2011 | 17643 | 937.25  | -13.4945 | 4 R.NSKSTLA chr4@110    | 2.18E-11 | 7.74E-04 |
| 22Feb2011 | 12436 | 700.38  | -21.7395 | 3 K.YIYIIVN chrX@769    | 8.37E-11 | 0.002452 |
| 22Feb2011 | 13725 | 700.38  | -21.7395 | 3 K.YIYIIVN chrX@769    | 8.33E-11 | 0.002366 |
| 22Feb2011 | 25458 | 616.01  | 4.668182 | 3 K.FK+14.01 chr2@107   | 4.47E-10 | 0.009552 |
| 22Feb2011 | 7387  | 661.34  | -10.8143 | 2 _KEYSSVH: Splice@chr  | 5.20E-10 | 0.009351 |
| 22Feb2011 | 7853  | 661.34  | -10.8143 | 2 _KEYSSVH: Splice@chr  | 1.27E-10 | 0.004479 |
| 22Feb2011 | 7695  | 661.34  | -10.8143 | 2 _KEYSSVH: Splice@chr  | 9.31E-11 | 0.002515 |
| 22Feb2011 | 7277  | 661.34  | -10.8143 | 2 _KEYSSVH: Splice@chr  | 3.96E-10 | 0.008035 |
| 22Feb2011 | 1700  | 609.83  | 29.17395 | 2 K.YNQNHR Splice@chr   | 1.72E-10 | 0.003934 |
| 22Feb2011 | 16906 | 687.38  | 10.19675 | 3 R.TRGSNLL Splice@chr  | 1.73E-10 | 0.004816 |
| 22Feb2011 | 20483 | 841.94  | 25.79317 | 4 _TQNCRK+ chr4@204     | 3.14E-10 | 0.007808 |
| 22Feb2011 | 16340 | 765.09  | 13.56009 | 3 K.AELK+14. chr2@192   | 4.22E-10 | 0.006983 |
| 22Feb2011 | 21449 | 778.44  | 16.89535 | 5 R.PFSLFSR chr1@607    | 1.04E-10 | 0.001879 |
| 22Feb2011 | 22910 | 1039.86 | -3.81944 | 3 R.NNMLEV Splice@chr   | 4.42E-10 | 0.009858 |
| 22Feb2011 | 5105  | 791.41  | -12.3551 | 1 _MTAQGK chr4@133      | 3.72E-10 | 0.005396 |
| 22Feb2011 | 5051  | 791.41  | -12.3551 | 1 _MTAQGK chr4@133      | 1.49E-10 | 0.002016 |
| 22Feb2011 | 5179  | 791.41  | -12.3551 | 1 _MTAQGK chr4@133      | 2.86E-10 | 0.004641 |
| 22Feb2011 | 2756  | 510.27  | -20.0146 | 2 R.STLSIFSH chr1@111   | 2.14E-10 | 0.004214 |
| 22Feb2011 | 2655  | 510.27  | -20.0146 | 2 R.STLSIFSH Splice@chr | 1.46E-10 | 0.004611 |
| 22Feb2011 | 2511  | 717.35  | -4.43058 | 1 K.SSNAPNK chr2@270    | 4.75E-10 | 0.00863  |
| 22Feb2011 | 7736  | 583.83  | -22.515  | 2 K.KIDEK+14 chr3@162   | 3.68E-10 | 0.007635 |
| 22Feb2011 | 5739  | 546.94  | -3.61575 | 3 R.K+14.016 chr2@167   | 3.17E-10 | 0.00834  |
| 22Feb2011 | 23244 | 989.49  | -16.532  | 3 K.SGTIFDNI Splice@chr | 3.08E-12 | 3.48E-04 |
| 22Feb2011 | 24516 | 989.49  | -16.532  | 3 K.SGTIFDNI Splice@chr | 2.26E-12 | 1.24E-04 |
| 22Feb2011 | 26395 | 785.09  | 21.17369 | 3 R.K+14.016 Splice@chr | 1.28E-10 | 0.002746 |
| 22Feb2011 | 16801 | 534.94  | -13.1527 | 3 R.M+15.99 chr2@363    | 2.59E-10 | 0.004084 |
| 22Feb2011 | 16557 | 534.94  | -13.1527 | 3 R.M+15.99 chr2@363    | 3.30E-10 | 0.007511 |
| 22Feb2011 | 24895 | 967.86  | -22.4589 | 3 _NYLDAHK chr3@896     | 3.37E-10 | 0.005674 |
| 22Feb2011 | 21286 | 1012.19 | -23.8086 | 3 G.SCGEQNI chrX@485    | 4.36E-10 | 0.009868 |
| 22Feb2011 | 7737  | 626.32  | -10.6948 | 2 K.YSFFSEKK Splice@chr | 2.12E-10 | 0.003551 |
| 22Feb2011 | 20291 | 1139.56 | -6.72974 | 2 R.RKCVM+ chr2@286     | 3.81E-10 | 0.007299 |
| 22Feb2011 | 9006  | 545.32  | -6.22709 | 2 K.LLIYEVNP chrX@124   | 2.03E-10 | 0.00444  |
| 22Feb2011 | 6635  | 560.31  | -17.2873 | 3 K.SVLFGID chr4@166    | 5.97E-10 | 0.009971 |
| 22Feb2011 | 6250  | 560.31  | -17.2873 | 3 K.SVLFGID Splice@chr  | 3.10E-10 | 0.007136 |
| 22Feb2011 | 10967 | 500.28  | -7.49784 | 3 R.PLNLQR chr1@162     | 1.94E-10 | 0.004296 |
| 22Feb2011 | 10399 | 500.28  | -7.49784 | 3 R.PLNLQR chr1@162     | 4.87E-10 | 0.008374 |
| 22Feb2011 | 10810 | 500.28  | -7.49784 | 3 R.PLNLQR chr1@162     | 1.03E-10 | 0.002421 |
| 22Feb2011 | 10728 | 500.28  | -7.49784 | 3 R.PLNLQR chr1@162     | 2.60E-10 | 0.006567 |
| 22Feb2011 | 10603 | 500.28  | -7.49784 | 3 R.PLNLQR chr1@162     | 4.28E-10 | 0.009363 |
| 22Feb2011 | 8196  | 509.75  | -24.2939 | 2 R.ERETSAT chr4@169    | 1.24E-10 | 0.003003 |
| 22Feb2011 | 13163 | 532.25  | -22.4033 | 2 K.ETDKTEE chrX@642    | 4.29E-11 | 0.001048 |
| 24Mar2011 | 6347  | 944.48  | -14.3614 | 2 R.K+14.016 chr4@284   | 6.68E-10 | 0.009324 |
| 22Feb2011 | 23565 | 728.88  | -20.1098 | 4 I.FLLQGYK chr3@541    | 3.96E-10 | 0.008035 |
| 22Feb2011 | 7740  | 709.36  | -16.8881 | 2 E.TCEIVSVK chr2@228   | 6.50E-10 | 0.009339 |
| 22Feb2011 | 15129 | 789.17  | -6.95171 | 4 K.ISCSHQK chr3@560    | 5.71E-10 | 0.008163 |
| 22Feb2011 | 23787 | 804.81  | -1.18922 | 3 R.KLLIFLISA chr4@123  | 1.91E-10 | 0.00477  |

|           |       |         |          |                        |          |          |
|-----------|-------|---------|----------|------------------------|----------|----------|
| 22Feb2011 | 25066 | 932.51  | 14.21877 | 2 R.WELEEVC chr3@7847  | 1.97E-10 | 0.003931 |
| 22Feb2011 | 24450 | 642.56  | 2.784681 | 4 K.DNSITGSi chr3@1267 | 2.73E-10 | 0.00582  |
| 22Feb2011 | 16348 | 601.81  | -18.3687 | 4 K.NFFFNQ\ chr4@1571  | 1.77E-10 | 0.003666 |
| 22Feb2011 | 19805 | 698.36  | 7.052356 | 2 K.KEFLNNN chrX@6004  | 4.57E-11 | 6.97E-04 |
| 22Feb2011 | 6640  | 892.45  | 13.96764 | 1 R.SSNTLNE Splice@chr | 3.79E-10 | 0.009284 |
| 22Feb2011 | 22824 | 1152.61 | -27.5594 | 1 K.DIKKYFK\ chr2@1258 | 5.72E-10 | 0.009533 |
| 22Feb2011 | 25938 | 777.14  | -15.7912 | 4 _TIFRSHHf chr1@6700  | 2.30E-11 | 5.28E-04 |
| 22Feb2011 | 23514 | 597.29  | 19.75578 | 2 R.NNSFKPC Splice@chr | 1.29E-10 | 0.004036 |
| 22Feb2011 | 23993 | 597.29  | 19.75578 | 2 R.NNSFKPC Splice@chr | 1.84E-10 | 0.004561 |
| 22Feb2011 | 24017 | 963.19  | -26.9674 | 3 R.CIK+14.0 chr3@1274 | 1.06E-10 | 0.001962 |
| 22Feb2011 | 24149 | 963.19  | -26.9674 | 3 R.CIK+14.0 chr3@1274 | 3.55E-10 | 0.006661 |
| 22Feb2011 | 22239 | 963.19  | -26.9674 | 3 R.CIK+14.0 chr3@1274 | 2.89E-10 | 0.00641  |
| 22Feb2011 | 26739 | 1077.89 | -3.91129 | 3 R.MIASARL Splice@chr | 2.35E-10 | 0.004565 |
| 22Feb2011 | 19949 | 736.11  | -22.1684 | 4 R.QMPTIFF chr1@5721  | 3.18E-10 | 0.007038 |
| 22Feb2011 | 19544 | 736.11  | -22.1684 | 4 R.QMPTIFF chr1@5721  | 1.60E-10 | 0.004366 |
| 22Feb2011 | 21199 | 889.45  | -3.72383 | 5 R.M+15.99 chr5@1638  | 4.56E-10 | 0.008952 |
| 22Feb2011 | 21947 | 797.42  | -18.8525 | 2 K.FWIFKNV chr2@4404  | 3.04E-10 | 0.007545 |
| 22Feb2011 | 3881  | 506.24  | -18.4427 | 3 K.EFSK+14. chr2@7966 | 4.53E-11 | 8.12E-04 |
| 22Feb2011 | 23794 | 1069.57 | -11.2852 | 2 K.MK+14.0 chr4@8810  | 2.29E-10 | 0.006518 |
| 22Feb2011 | 22929 | 963.85  | 21.6672  | 3 _DKLTLAR\ Splice@chr | 4.29E-10 | 0.009597 |
| 22Feb2011 | 25368 | 938.49  | -22.7105 | 4 _KLWK+14 chr3@7599   | 1.84E-10 | 0.00467  |
| 22Feb2011 | 20861 | 964.5   | 11.06119 | 2 V.RGDLKH\ chrX@7824  | 3.21E-10 | 0.007038 |
| 22Feb2011 | 20519 | 857.44  | -25.7359 | 3 K.VVQSVNI Splice@chr | 5.79E-12 | 6.35E-04 |
| 22Feb2011 | 20220 | 857.44  | -25.7359 | 3 K.VVQSVNI Splice@chr | 4.23E-10 | 0.008955 |
| 22Feb2011 | 334   | 434.9   | 23.16402 | 3 R.NEEENISI chr5@3204 | 5.36E-10 | 0.009588 |
| 22Feb2011 | 20880 | 1042.55 | -21.8964 | 2 R.FSTFTPT\ chrX@3212 | 2.56E-10 | 0.007164 |
| 22Feb2011 | 22818 | 1042.55 | -21.8964 | 2 R.FSTFTPT\ chrX@3212 | 3.73E-10 | 0.009215 |
| 22Feb2011 | 3026  | 499.26  | 9.309975 | 3 R.TAEYGNE Splice@chr | 1.62E-10 | 0.002814 |
| 22Feb2011 | 6054  | 525.26  | -7.21819 | 3 _NTSSQSK chr4@1248   | 3.35E-10 | 0.006973 |
| 22Feb2011 | 24316 | 863.46  | 5.405013 | 3 R.VITEVCTI chr5@2015 | 3.62E-10 | 0.008987 |
| 22Feb2011 | 10803 | 513.94  | 29.03505 | 3 _KLENFFEI chr2@7426  | 5.87E-10 | 0.0099   |
| 22Feb2011 | 7367  | 435.75  | -0.0702  | 4 R.IESAK+14 chrX@5290 | 1.33E-10 | 0.002783 |
| 22Feb2011 | 26817 | 955.81  | -6.20205 | 3 R.FWTYSQI chr2@5434  | 4.45E-10 | 0.008401 |
| 22Feb2011 | 28075 | 832.09  | -22.7009 | 3 K.WWLFSP chr4@7435   | 4.07E-10 | 0.008237 |
| 22Feb2011 | 1549  | 410.22  | 20.25378 | 3 R.FSWLVNI chrX@1768  | 5.16E-10 | 0.009488 |
| 22Feb2011 | 21459 | 856.4   | -9.87348 | 3 R.FCGELDS Splice@chr | 1.33E-10 | 0.002755 |
| 22Feb2011 | 23628 | 856.07  | -4.75871 | 3 R.FCGELDS Splice@chr | 3.44E-10 | 0.006852 |
| 22Feb2011 | 21928 | 856.4   | -9.87348 | 3 R.FCGELDS Splice@chr | 6.00E-11 | 0.001311 |
| 22Feb2011 | 10652 | 554.32  | 20.88555 | 3 R.VTFIIQQI chr3@3729 | 1.99E-10 | 0.003296 |
| 22Feb2011 | 15011 | 695.37  | 21.53622 | 2 R.QSLICACI chr1@4125 | 1.13E-10 | 0.002594 |
| 22Feb2011 | 23820 | 747.74  | 22.59807 | 3 S.LFRSFNY\ chr3@3729 | 3.98E-10 | 0.00737  |
| 22Feb2011 | 25485 | 915.49  | -19.2643 | 2 K.SNLLKRM Splice@chr | 3.27E-10 | 0.008062 |
| 22Feb2011 | 7575  | 489.77  | 23.81628 | 2 _LVFGDAE chr3@1148   | 3.16E-10 | 0.008035 |
| 22Feb2011 | 7430  | 489.77  | 23.81628 | 2 _LVFGDAE chr3@1148   | 2.22E-10 | 0.005114 |
| 22Feb2011 | 16168 | 858.8   | -23.7174 | 3 _CIQIQIFQ chr1@1054  | 8.76E-11 | 0.002213 |
| 22Feb2011 | 15991 | 858.8   | -23.7174 | 3 _CIQIQIFQ chr1@1054  | 3.60E-10 | 0.008053 |
| 22Feb2011 | 15338 | 858.8   | -23.7174 | 3 _CIQIQIFQ chr1@1054  | 4.51E-10 | 0.008521 |

|           |       |         |          |                          |          |          |
|-----------|-------|---------|----------|--------------------------|----------|----------|
| 22Feb2011 | 15138 | 858.8   | -23.7174 | 3 _..CIQIQIFQ chr1@1054  | 3.59E-10 | 0.006847 |
| 22Feb2011 | 14635 | 858.8   | -23.7174 | 3 _..CIQIQIFQ chr1@1054  | 4.27E-10 | 0.009358 |
| 22Feb2011 | 15786 | 859.14  | -17.2417 | 3 _..CIQIQIFQ chr1@1054  | 4.93E-11 | 8.95E-04 |
| 22Feb2011 | 15396 | 858.8   | -23.7174 | 3 _..CIQIQIFQ chr1@1054  | 1.67E-10 | 0.003482 |
| 22Feb2011 | 16596 | 858.8   | -23.7174 | 3 _..CIQIQIFQ chr1@1054  | 2.62E-10 | 0.005828 |
| 22Feb2011 | 8299  | 597.66  | -29.324  | 3 R.AVQNSIV Splice@chr   | 9.93E-11 | 0.0033   |
| 22Feb2011 | 23719 | 764.41  | 5.010319 | 3 R.STGSSDG chr5@2648    | 3.95E-10 | 0.007884 |
| 22Feb2011 | 23818 | 764.41  | 5.010319 | 3 R.STGSSDG chr5@2648    | 3.11E-12 | 0        |
| 22Feb2011 | 3288  | 402.2   | 10.20855 | 2 _..DGGGGG chrX@6756    | 4.35E-10 | 0.009171 |
| 22Feb2011 | 2676  | 515.29  | -28.0642 | 3 _..QK+14.01 Splice@chr | 4.19E-11 | 0.001659 |
| 22Feb2011 | 9334  | 528.82  | 25.44101 | 2 R.AEPLVLS/ chr4@1858   | 3.13E-11 | 3.94E-04 |
| 22Feb2011 | 8864  | 528.82  | 25.44101 | 2 R.AEPLVLS/ chr4@1858   | 8.59E-11 | 0.001457 |
| 22Feb2011 | 9618  | 528.82  | 25.44101 | 2 R.AEPLVLS/ chr4@1858   | 8.04E-12 | 5.33E-04 |
| 22Feb2011 | 10403 | 598.34  | 12.36388 | 2 L.FKLDTTTL chrX@1057   | 3.31E-10 | 0.00715  |
| 22Feb2011 | 9039  | 765.43  | -26.4039 | 2 K.LFSLLSAY chr5@1851   | 5.62E-10 | 0.009305 |
| 22Feb2011 | 12859 | 565.32  | -11.7531 | 3 _..LLELETG Splice@chr  | 3.81E-10 | 0.007593 |
| 22Feb2011 | 297   | 523.78  | -29.2718 | 2 R.KNGIFQN chr5@1780    | 4.10E-10 | 0.00841  |
| 22Feb2011 | 25659 | 833.09  | -17.9774 | 3 R.YCK+14.C chr1@4459   | 1.87E-10 | 0.00467  |
| 22Feb2011 | 5137  | 521.95  | -28.7432 | 3 R.NPNKRK/ chr5@1477    | 2.34E-10 | 0.0054   |
| 22Feb2011 | 4244  | 521.95  | -28.7432 | 3 R.NPNKRK/ chr5@1477    | 2.77E-10 | 0.005041 |
| 22Feb2011 | 4741  | 521.95  | -28.7432 | 3 R.NPNKRK/ chr5@1477    | 3.27E-10 | 0.006672 |
| 22Feb2011 | 23090 | 924.49  | -3.06261 | 3 K.PRDNLLD chr2@1245    | 2.28E-10 | 0.003781 |
| 22Feb2011 | 14689 | 747.39  | -12.7342 | 3 K.FCETGLV chr2@1307    | 5.60E-10 | 0.009688 |
| 22Feb2011 | 13889 | 663.65  | 25.42267 | 3 R.NSNTSTC Splice@chr   | 5.57E-10 | 0.007847 |
| 22Feb2011 | 14537 | 663.65  | 25.42267 | 3 R.NSNTSTC Splice@chr   | 1.06E-10 | 0.002582 |
| 22Feb2011 | 1297  | 455.22  | -28.9196 | 2 R.FGSDLPN chr5@5481    | 4.23E-11 | 0.001265 |
| 22Feb2011 | 16323 | 594.85  | -6.06399 | 2 R.GIETVSK+ Splice@chr  | 4.10E-10 | 0.008068 |
| 22Feb2011 | 9039  | 651.35  | -25.9022 | 2 K.FFFDSK+ chr2@1199    | 2.21E-10 | 0.00515  |
| 22Feb2011 | 24992 | 1075.55 | 7.985342 | 2 I.YQLATFN( chrX@1425   | 1.74E-10 | 0.004607 |
| 22Feb2011 | 13710 | 684.37  | -4.4443  | 4 _..RSLPRCD Splice@chr  | 1.01E-10 | 0.003124 |
| 22Feb2011 | 27241 | 846.44  | -26.8848 | 1 K.NGKNREI Splice@chr   | 3.00E-10 | 0.008043 |
| 22Feb2011 | 21757 | 812.44  | -24.4548 | 3 K.TVFELCM chrX@1739    | 1.54E-10 | 0.002814 |
| 22Feb2011 | 24933 | 1060.05 | -25.1092 | 2 F.SYIHLVSI/ chrX@1236  | 3.11E-10 | 0.005917 |
| 22Feb2011 | 24967 | 1059.55 | -23.5246 | 2 F.SYIHLVSI/ chrX@1236  | 4.36E-10 | 0.00999  |
| 22Feb2011 | 25560 | 1060.05 | -25.1092 | 2 F.SYIHLVSI/ chrX@1236  | 1.95E-10 | 0.004542 |
| 22Feb2011 | 16073 | 653.9   | 20.97317 | 4 L.VTVDFK+ chrX@1073    | 4.52E-10 | 0.007955 |
| 22Feb2011 | 6522  | 483.64  | 6.576124 | 3 R.LVILSKM- chrX@7347   | 5.82E-10 | 0.008245 |
| 22Feb2011 | 7838  | 483.64  | 6.576124 | 3 R.LVILSKM- chrX@7347   | 2.05E-10 | 0.004471 |
| 22Feb2011 | 7270  | 483.64  | 6.576124 | 3 R.LVILSKM- chrX@7347   | 1.36E-10 | 0.004036 |
| 22Feb2011 | 20552 | 864.45  | 21.68024 | 2 K.NLVPNPF chr2@1072    | 1.83E-10 | 0.0034   |
| 22Feb2011 | 8184  | 688.38  | -2.21987 | 1 R.MKGGAP chr5@1820     | 1.64E-10 | 0.004624 |
| 22Feb2011 | 7919  | 688.38  | -2.21987 | 1 R.MKGGAP chr5@1820     | 8.79E-11 | 0.002756 |
| 22Feb2011 | 8590  | 688.38  | -2.21987 | 1 R.MKGGAP chr5@1820     | 4.39E-11 | 0.001304 |
| 22Feb2011 | 8485  | 560.32  | 10.54208 | 2 R.LTELSGG' chrX@1103   | 2.63E-10 | 0.005828 |
| 22Feb2011 | 6103  | 405.19  | -8.83395 | 2 R.DGDFSLR chr3@9081    | 5.49E-10 | 0.009876 |
| 22Feb2011 | 6254  | 405.19  | -8.83395 | 2 R.DGDFSLR chr3@9081    | 5.01E-10 | 0.009875 |
| 22Feb2011 | 6322  | 405.19  | -8.83395 | 2 R.DGDFSLR chr3@9081    | 5.01E-10 | 0.008839 |

|           |       |         |          |                         |          |          |
|-----------|-------|---------|----------|-------------------------|----------|----------|
| 22Feb2011 | 6066  | 405.19  | -8.83395 | 2 R.DGDFSLR chr3@9081   | 4.84E-10 | 0.009015 |
| 22Feb2011 | 25713 | 1057.56 | 0.34661  | 2 K.K+14.016 chr3@1846  | 1.77E-10 | 0.003565 |
| 22Feb2011 | 13178 | 601.34  | 14.57276 | 3 _..LLNCNPV Splice@chr | 2.27E-10 | 0.004869 |
| 22Feb2011 | 11395 | 564.65  | -10.3233 | 3 R.ILNIEM+1 chr2@9116  | 2.96E-10 | 0.004349 |
| 22Feb2011 | 11318 | 564.65  | -10.3233 | 3 R.ILNIEM+1 chr2@9116  | 1.83E-10 | 0.00252  |
| 22Feb2011 | 12268 | 564.65  | -10.3233 | 3 R.ILNIEM+1 chr2@9116  | 4.12E-11 | 0.001354 |
| 22Feb2011 | 11837 | 564.65  | -10.3233 | 3 R.ILNIEM+1 chr2@9116  | 5.51E-12 | 1.20E-04 |
| 22Feb2011 | 11745 | 564.65  | -10.3233 | 3 R.ILNIEM+1 chr2@9116  | 8.48E-11 | 0.001748 |
| 22Feb2011 | 12396 | 564.65  | -10.3233 | 3 R.ILNIEM+1 chr2@9116  | 4.73E-11 | 8.72E-04 |
| 22Feb2011 | 12130 | 564.65  | -10.3233 | 3 R.ILNIEM+1 chr2@9116  | 2.01E-10 | 0.004699 |
| 22Feb2011 | 12541 | 564.65  | -10.3233 | 3 R.ILNIEM+1 chr2@9116  | 2.48E-11 | 0.001136 |
| 22Feb2011 | 11936 | 564.65  | -10.3233 | 3 R.ILNIEM+1 chr2@9116  | 2.04E-11 | 8.66E-04 |
| 22Feb2011 | 11677 | 564.65  | -10.3233 | 3 R.ILNIEM+1 chr2@9116  | 1.52E-11 | 2.51E-04 |
| 22Feb2011 | 11450 | 564.65  | -10.3233 | 3 R.ILNIEM+1 chr2@9116  | 1.83E-10 | 0.003449 |
| 22Feb2011 | 12378 | 564.65  | -10.3233 | 3 R.ILNIEM+1 chr2@9116  | 1.37E-10 | 0.002739 |
| 22Feb2011 | 11751 | 564.65  | -10.3233 | 3 R.ILNIEM+1 chr2@9116  | 5.34E-11 | 0.00164  |
| 22Feb2011 | 11993 | 564.65  | -10.3233 | 3 R.ILNIEM+1 chr2@9116  | 2.23E-11 | 7.50E-04 |
| 22Feb2011 | 12824 | 564.65  | -10.3233 | 3 R.ILNIEM+1 chr2@9116  | 3.88E-11 | 0.001575 |
| 22Feb2011 | 18607 | 915.24  | -9.47999 | 4 Q.APILQVP Splice@chr  | 4.80E-12 | 3.48E-04 |
| 22Feb2011 | 18663 | 915.24  | -9.47999 | 4 Q.APILQVP Splice@chr  | 3.12E-12 | 3.48E-04 |
| 22Feb2011 | 20184 | 915.49  | -10.3974 | 4 Q.APILQVP Splice@chr  | 1.92E-11 | 8.17E-04 |
| 22Feb2011 | 19709 | 732.59  | -15.2041 | 5 Q.APILQVP Splice@chr  | 2.84E-10 | 0.005429 |
| 22Feb2011 | 19845 | 915.49  | -10.3974 | 4 Q.APILQVP Splice@chr  | 5.35E-11 | 0.001007 |
| 22Feb2011 | 19784 | 915.49  | -10.3974 | 4 Q.APILQVP Splice@chr  | 3.54E-10 | 0.006747 |
| 22Feb2011 | 19761 | 732.59  | -15.2041 | 5 Q.APILQVP Splice@chr  | 5.97E-10 | 0.009922 |
| 22Feb2011 | 19975 | 915.49  | -10.3974 | 4 Q.APILQVP Splice@chr  | 5.71E-12 | 1.10E-04 |
| 22Feb2011 | 20134 | 732.59  | -15.2041 | 5 Q.APILQVP Splice@chr  | 3.10E-10 | 0.006636 |
| 22Feb2011 | 19890 | 915.49  | -10.3974 | 4 Q.APILQVP Splice@chr  | 8.56E-12 | 6.90E-04 |
| 22Feb2011 | 18696 | 915.23  | -20.4287 | 4 Q.APILQVP Splice@chr  | 3.66E-11 | 0.001392 |
| 22Feb2011 | 19938 | 915.49  | -10.3974 | 4 Q.APILQVP Splice@chr  | 3.77E-12 | 1.11E-04 |
| 22Feb2011 | 19993 | 915.49  | -10.3974 | 4 Q.APILQVP Splice@chr  | 1.19E-11 | 3.18E-04 |
| 22Feb2011 | 19945 | 732.59  | -15.2041 | 5 Q.APILQVP Splice@chr  | 2.21E-10 | 0.004512 |
| 22Feb2011 | 20043 | 915.49  | -10.3974 | 4 Q.APILQVP Splice@chr  | 1.42E-10 | 0.002996 |
| 22Feb2011 | 20094 | 915.24  | -9.47999 | 4 Q.APILQVP Splice@chr  | 4.59E-13 | 0        |
| 22Feb2011 | 20037 | 915.49  | -10.3974 | 4 Q.APILQVP Splice@chr  | 7.23E-11 | 0.001935 |
| 22Feb2011 | 19981 | 915.49  | -10.3974 | 4 Q.APILQVP Splice@chr  | 2.95E-11 | 6.62E-04 |
| 22Feb2011 | 18743 | 732.59  | -15.2041 | 5 Q.APILQVP Splice@chr  | 2.15E-10 | 0.006349 |
| 22Feb2011 | 20401 | 915.49  | -10.3974 | 4 Q.APILQVP Splice@chr  | 2.69E-10 | 0.006657 |
| 22Feb2011 | 20456 | 915.24  | -9.47999 | 4 Q.APILQVP Splice@chr  | 5.52E-13 | 0        |
| 22Feb2011 | 19309 | 915.49  | -10.3974 | 4 Q.APILQVP Splice@chr  | 8.55E-12 | 4.42E-04 |
| 22Feb2011 | 19408 | 915.24  | -9.47999 | 4 Q.APILQVP Splice@chr  | 5.81E-11 | 0.001982 |
| 22Feb2011 | 19354 | 915.49  | -10.3974 | 4 Q.APILQVP Splice@chr  | 3.15E-12 | 1.29E-04 |
| 22Feb2011 | 19244 | 732.59  | -15.2041 | 5 Q.APILQVP Splice@chr  | 1.81E-10 | 0.004684 |
| 22Feb2011 | 20487 | 915.49  | -10.3974 | 4 Q.APILQVP Splice@chr  | 4.96E-10 | 0.008762 |
| 22Feb2011 | 19314 | 732.59  | -15.2041 | 5 Q.APILQVP Splice@chr  | 2.00E-10 | 0.003729 |
| 22Feb2011 | 19260 | 732.59  | -15.2041 | 5 Q.APILQVP Splice@chr  | 3.41E-10 | 0.006556 |
| 22Feb2011 | 19255 | 915.49  | -10.3974 | 4 Q.APILQVP Splice@chr  | 9.89E-12 | 2.86E-04 |

|           |       |        |          |                         |          |          |
|-----------|-------|--------|----------|-------------------------|----------|----------|
| 22Feb2011 | 19306 | 915.23 | -20.4287 | 4 Q.APILQVP Splice@chr  | 4.94E-12 | 2.10E-04 |
| 22Feb2011 | 20274 | 915.49 | -10.3974 | 4 Q.APILQVP Splice@chr  | 1.75E-11 | 5.34E-04 |
| 22Feb2011 | 20329 | 915.49 | -10.3974 | 4 Q.APILQVP Splice@chr  | 5.76E-12 | 2.00E-04 |
| 22Feb2011 | 20300 | 915.49 | -10.3974 | 4 Q.APILQVP Splice@chr  | 2.90E-11 | 6.19E-04 |
| 22Feb2011 | 20409 | 915.24 | -9.47999 | 4 Q.APILQVP Splice@chr  | 1.47E-10 | 0.002962 |
| 22Feb2011 | 20352 | 915.49 | -10.3974 | 4 Q.APILQVP Splice@chr  | 8.31E-11 | 0.001833 |
| 22Feb2011 | 20468 | 915.49 | -10.3974 | 4 Q.APILQVP Splice@chr  | 8.53E-12 | 5.55E-04 |
| 22Feb2011 | 18706 | 915.49 | -10.3974 | 4 Q.APILQVP Splice@chr  | 1.15E-10 | 0.002912 |
| 22Feb2011 | 18751 | 915.49 | -10.3974 | 4 Q.APILQVP Splice@chr  | 1.85E-11 | 2.14E-04 |
| 22Feb2011 | 19936 | 915.49 | -10.3974 | 4 Q.APILQVP Splice@chr  | 7.77E-12 | 5.16E-04 |
| 22Feb2011 | 19947 | 732.59 | -15.2041 | 5 Q.APILQVP Splice@chr  | 1.97E-10 | 0.004018 |
| 22Feb2011 | 19890 | 732.59 | -15.2041 | 5 Q.APILQVP Splice@chr  | 3.42E-11 | 9.70E-04 |
| 22Feb2011 | 19880 | 915.49 | -10.3974 | 4 Q.APILQVP Splice@chr  | 4.26E-12 | 3.39E-04 |
| 22Feb2011 | 18608 | 915.49 | -10.3974 | 4 Q.APILQVP Splice@chr  | 1.99E-12 | 1.25E-04 |
| 22Feb2011 | 18665 | 915.49 | -10.3974 | 4 Q.APILQVP Splice@chr  | 7.52E-13 | 0        |
| 22Feb2011 | 20147 | 732.59 | -15.2041 | 5 Q.APILQVP Splice@chr  | 2.99E-10 | 0.007259 |
| 22Feb2011 | 20087 | 732.59 | -15.2041 | 5 Q.APILQVP Splice@chr  | 3.54E-10 | 0.008603 |
| 22Feb2011 | 20071 | 915.24 | -9.47999 | 4 Q.APILQVP Splice@chr  | 4.97E-12 | 0        |
| 22Feb2011 | 19546 | 915.23 | -20.4287 | 4 Q.APILQVP Splice@chr  | 9.32E-11 | 0.002968 |
| 22Feb2011 | 19472 | 732.59 | -15.2041 | 5 Q.APILQVP Splice@chr  | 1.05E-11 | 3.28E-04 |
| 22Feb2011 | 19500 | 915.49 | -10.3974 | 4 Q.APILQVP Splice@chr  | 5.81E-11 | 0.001728 |
| 22Feb2011 | 19560 | 915.23 | -20.4287 | 4 Q.APILQVP Splice@chr  | 9.92E-11 | 0.003109 |
| 22Feb2011 | 19612 | 915.49 | -10.3974 | 4 Q.APILQVP Splice@chr  | 3.06E-13 | 0        |
| 22Feb2011 | 19555 | 732.59 | -15.2041 | 5 Q.APILQVP Splice@chr  | 1.64E-10 | 0.003933 |
| 22Feb2011 | 19681 | 915.49 | -10.3974 | 4 Q.APILQVP Splice@chr  | 4.01E-12 | 2.48E-04 |
| 22Feb2011 | 20339 | 915.49 | -10.3974 | 4 Q.APILQVP Splice@chr  | 1.34E-12 | 0        |
| 22Feb2011 | 20387 | 915.49 | -10.3974 | 4 Q.APILQVP Splice@chr  | 5.26E-13 | 0        |
| 22Feb2011 | 19837 | 915.49 | -10.3974 | 4 Q.APILQVP Splice@chr  | 2.98E-11 | 9.30E-04 |
| 22Feb2011 | 19783 | 915.24 | -9.47999 | 4 Q.APILQVP Splice@chr  | 7.97E-11 | 0.002587 |
| 22Feb2011 | 19671 | 915.49 | -10.3974 | 4 Q.APILQVP Splice@chr  | 2.57E-10 | 0.006202 |
| 22Feb2011 | 19779 | 915.49 | -10.3974 | 4 Q.APILQVP Splice@chr  | 4.47E-11 | 8.23E-04 |
| 22Feb2011 | 19724 | 915.49 | -10.3974 | 4 Q.APILQVP Splice@chr  | 1.38E-11 | 2.28E-04 |
| 22Feb2011 | 20020 | 915.49 | -10.3974 | 4 Q.APILQVP Splice@chr  | 3.89E-11 | 0.001497 |
| 22Feb2011 | 19971 | 915.49 | -10.3974 | 4 Q.APILQVP Splice@chr  | 9.04E-12 | 5.33E-04 |
| 22Feb2011 | 20884 | 732.59 | -15.2041 | 5 Q.APILQVP Splice@chr  | 1.76E-10 | 0.004385 |
| 22Feb2011 | 25872 | 859.79 | -12.0347 | 3 K.DISEMKL Splice@chr  | 1.97E-10 | 0.006565 |
| 22Feb2011 | 26983 | 953.5  | 7.030646 | 3 _NFIFCQLS chr5@1345   | 3.92E-11 | 6.97E-04 |
| 22Feb2011 | 11805 | 461.75 | 7.352216 | 2 K.KCGMTV chr2@1081    | 4.37E-10 | 0.009768 |
| 22Feb2011 | 25950 | 653.69 | -25.1042 | 3 K.STLYPNA Splice@chr  | 2.51E-10 | 0.005688 |
| 22Feb2011 | 1557  | 458.25 | 2.469486 | 2 R.ESNVLPT chr2@8570   | 2.84E-10 | 0.006368 |
| 22Feb2011 | 22800 | 618.99 | -7.17689 | 3 K.EIK+14.0: chr5@7582 | 5.03E-11 | 0.001827 |
| 22Feb2011 | 22846 | 618.99 | -7.17689 | 3 K.EIK+14.0: chr5@7582 | 1.79E-11 | 7.24E-04 |
| 22Feb2011 | 24281 | 618.99 | -7.17689 | 3 K.EIK+14.0: chr5@7582 | 1.85E-11 | 5.20E-04 |
| 22Feb2011 | 24238 | 618.99 | -7.17689 | 3 K.EIK+14.0: chr5@7582 | 1.55E-10 | 0.003413 |
| 22Feb2011 | 24364 | 619.32 | -14.3855 | 3 K.EIK+14.0: chr5@7582 | 1.95E-11 | 2.95E-04 |
| 22Feb2011 | 24316 | 619.32 | -14.3855 | 3 K.EIK+14.0: chr5@7582 | 3.49E-11 | 0.001116 |
| 22Feb2011 | 23281 | 618.99 | -7.17689 | 3 K.EIK+14.0: chr5@7582 | 2.95E-11 | 7.16E-04 |

|           |       |         |          |                         |          |          |
|-----------|-------|---------|----------|-------------------------|----------|----------|
| 22Feb2011 | 23356 | 619.32  | -14.3855 | 3 K.EIK+14.0: chr5@7582 | 4.54E-11 | 0.001351 |
| 22Feb2011 | 22642 | 618.99  | -7.17689 | 3 K.EIK+14.0: chr5@7582 | 1.96E-10 | 0.005558 |
| 22Feb2011 | 22851 | 619.32  | -14.3855 | 3 K.EIK+14.0: chr5@7582 | 1.19E-11 | 2.14E-04 |
| 22Feb2011 | 24140 | 619.32  | -14.3855 | 3 K.EIK+14.0: chr5@7582 | 2.26E-11 | 7.89E-04 |
| 22Feb2011 | 22528 | 618.99  | -7.17689 | 3 K.EIK+14.0: chr5@7582 | 1.89E-11 | 5.46E-04 |
| 22Feb2011 | 24403 | 619.32  | -14.3855 | 3 K.EIK+14.0: chr5@7582 | 2.14E-11 | 3.19E-04 |
| 22Feb2011 | 23860 | 619.32  | -14.3855 | 3 K.EIK+14.0: chr5@7582 | 2.60E-11 | 8.36E-04 |
| 22Feb2011 | 23787 | 618.99  | -7.17689 | 3 K.EIK+14.0: chr5@7582 | 4.38E-11 | 8.23E-04 |
| 22Feb2011 | 24409 | 619.32  | -14.3855 | 3 K.EIK+14.0: chr5@7582 | 1.35E-11 | 9.18E-04 |
| 22Feb2011 | 8020  | 565.31  | -0.48525 | 2 K.QIFFGFLE chr5@3487  | 3.61E-10 | 0.008068 |
| 22Feb2011 | 23621 | 859.77  | -17.6082 | 3 _TYPGVVC chr4@1746    | 3.14E-10 | 0.008344 |
| 22Feb2011 | 25270 | 859.78  | -5.94785 | 3 _TYPGVVC chr4@1746    | 4.12E-10 | 0.008998 |
| 22Feb2011 | 24828 | 859.77  | -17.6082 | 3 _TYPGVVC chr4@1746    | 8.47E-11 | 0.002863 |
| 22Feb2011 | 3186  | 408.24  | 15.85214 | 3 R.AITHPGE chrX@1384   | 4.26E-10 | 0.007656 |
| 22Feb2011 | 19706 | 894.48  | 20.49412 | 2 R.RWITASIN Splice@chr | 4.42E-11 | 0.001476 |
| 22Feb2011 | 27051 | 576.54  | -22.1462 | 4 R.YPTVYYH Splice@chr  | 1.28E-10 | 0.002746 |
| 22Feb2011 | 14632 | 584.32  | -17.4738 | 2 K.FNRIYVID chr4@1240  | 2.34E-10 | 0.005455 |
| 22Feb2011 | 16033 | 584.32  | -17.4738 | 2 K.FNRIYVID chr4@1240  | 1.50E-10 | 0.004314 |
| 22Feb2011 | 15693 | 584.32  | -17.4738 | 2 K.FNRIYVID chr4@1240  | 5.20E-11 | 0.001575 |
| 22Feb2011 | 12297 | 582.29  | -23.567  | 3 K.TINSRSFE chr5@2837  | 3.69E-10 | 0.008757 |
| 22Feb2011 | 17153 | 697.04  | -0.0867  | 3 K.SMNPKNK chr2@3875   | 3.41E-10 | 0.007257 |
| 22Feb2011 | 17257 | 697.04  | -0.0867  | 3 K.SMNPKNK chr2@3875   | 4.67E-10 | 0.008337 |
| 22Feb2011 | 17215 | 697.04  | -0.0867  | 3 K.SMNPKNK chr2@3875   | 3.88E-10 | 0.009073 |
| 22Feb2011 | 12961 | 635.28  | 3.516831 | 2 K.M+15.99 chr2@9939   | 2.84E-11 | 9.88E-04 |
| 22Feb2011 | 5289  | 568.78  | 8.707525 | 2 _GRPFCGT Splice@chr   | 8.73E-11 | 0.002527 |
| 22Feb2011 | 14723 | 555.36  | 29.39804 | 2 K.KNQGK+ chr3@3485    | 4.05E-10 | 0.008738 |
| 22Feb2011 | 21541 | 591.95  | -10.0918 | 3 R.YAKTAEC Splice@chr  | 3.36E-10 | 0.007014 |
| 22Feb2011 | 20580 | 591.95  | -10.0918 | 3 R.YAKTAEC Splice@chr  | 2.19E-10 | 0.004619 |
| 22Feb2011 | 21875 | 591.95  | -10.0918 | 3 R.YAKTAEC chr2@1189   | 1.96E-10 | 0.004489 |
| 22Feb2011 | 4884  | 499.26  | -19.6606 | 2 K.DVGDTIH chr2@1274   | 1.44E-10 | 0.004049 |
| 22Feb2011 | 1249  | 467.24  | -11.3237 | 2 K.LCVETGV chr1@2621   | 1.65E-10 | 0.003437 |
| 22Feb2011 | 22953 | 1127.25 | 7.174441 | 3 R.MLYDTK+ Splice@chr  | 4.51E-10 | 0.008813 |
| 22Feb2011 | 10496 | 520.77  | -17.9663 | 4 R.FGSGEVT chr4@1181   | 4.34E-10 | 0.009008 |
| 22Feb2011 | 11421 | 782.4   | -25.8121 | 3 K.SRK+14.0 chr2@1774  | 2.08E-10 | 0.00463  |
| 22Feb2011 | 22408 | 813.41  | -7.49003 | 3 K.MLLEVLG Splice@chr  | 2.34E-10 | 0.00572  |
| 22Feb2011 | 1319  | 546.29  | 18.46931 | 2 K.NDTVVM chr5@1445    | 2.79E-11 | 9.50E-04 |
| 22Feb2011 | 26043 | 875.19  | -24.0761 | 4 R.QTDSLEG Splice@chr  | 2.83E-10 | 0.004641 |
| 22Feb2011 | 26200 | 874.94  | -23.1164 | 4 R.QTDSLEG Splice@chr  | 5.59E-10 | 0.009688 |
| 22Feb2011 | 26892 | 874.94  | -23.1164 | 4 R.QTDSLEG Splice@chr  | 4.14E-10 | 0.008724 |
| 22Feb2011 | 24200 | 929.01  | 25.71692 | 4 R.SLTSSATF chr1@1129  | 2.56E-10 | 0.003606 |
| 22Feb2011 | 25861 | 929.01  | 25.71692 | 4 R.SLTSSATF chr1@1129  | 4.29E-10 | 0.008433 |
| 22Feb2011 | 23272 | 864.47  | 15.86457 | 3 R.AK+14.01 chr1@7748  | 5.98E-10 | 0.009922 |
| 22Feb2011 | 24198 | 722.9   | -17.1472 | 4 R.K+14.016 chr5@1444  | 2.72E-10 | 0.005327 |
| 22Feb2011 | 21744 | 794.42  | -25.0777 | 2 K.KNGKRHI chr3@1039   | 3.92E-10 | 0.007816 |
| 22Feb2011 | 19553 | 570.3   | 2.253013 | 5 R.PRNLSM+ chr5@4787   | 2.97E-10 | 0.006082 |
| 22Feb2011 | 28253 | 767.74  | 4.91203  | 3 K.RVSQWE Splice@chr   | 3.46E-11 | 7.98E-04 |
| 22Feb2011 | 1303  | 485.78  | 28.07756 | 2 K.LVDAVYY chr3@3586   | 1.40E-10 | 0.00316  |

|           |       |         |          |                         |          |          |
|-----------|-------|---------|----------|-------------------------|----------|----------|
| 22Feb2011 | 1378  | 485.78  | 28.07756 | 2 K.LVDAVYY chr3@3586   | 8.65E-11 | 0.002016 |
| 22Feb2011 | 1338  | 485.78  | 28.07756 | 2 K.LVDAVYY chr3@3586   | 5.70E-11 | 0.001602 |
| 22Feb2011 | 1535  | 485.78  | 28.07756 | 2 K.LVDAVYY chr3@3586   | 2.58E-10 | 0.00641  |
| 22Feb2011 | 1641  | 485.78  | 28.07756 | 2 K.LVDAVYY chr3@3586   | 1.57E-11 | 3.68E-04 |
| 22Feb2011 | 6127  | 552.63  | -5.64507 | 3 K.DFKPNPK chr1@2435   | 3.73E-10 | 0.007732 |
| 1Mar2011- | 17539 | 1157.11 | 0.316764 | 2 K.FQFFREK chr2@2569   | 1.73E-10 | 0.005034 |
| 22Feb2011 | 16750 | 984.03  | -18.7902 | 2 K.YFNRRKK chr3@1570   | 2.71E-10 | 0.006036 |
| 1Mar2011- | 14479 | 458.91  | 2.80277  | 3 R.SM+15.9 Splice@chr  | 3.41E-10 | 0.008906 |
| 22Feb2011 | 23002 | 926     | -6.36976 | 2 _FIFSVVVF chr5@1601   | 4.14E-10 | 0.00824  |
| 22Feb2011 | 27646 | 1057.57 | -14.3031 | 2 _IQRILLPM chrX@1486   | 4.59E-10 | 0.008817 |
| 22Feb2011 | 19569 | 901.49  | 23.62034 | 3 G.EVINDNF Splice@chr  | 3.76E-11 | 0.00139  |
| 22Feb2011 | 19310 | 761.13  | -1.10373 | 4 K.M+15.99 Splice@chr  | 6.07E-11 | 0.001419 |
| 22Feb2011 | 21673 | 974.84  | 24.18137 | 3 R.LCTLFMS Splice@chr  | 3.63E-10 | 0.007558 |
| 22Feb2011 | 913   | 561.76  | -15.4132 | 2 P.ACLTTDD Splice@chr  | 8.03E-11 | 0.001435 |
| 22Feb2011 | 1355  | 561.26  | -12.4193 | 2 P.ACLTTDD Splice@chr  | 5.41E-11 | 0.00228  |
| 22Feb2011 | 1248  | 561.26  | -12.4193 | 2 P.ACLTTDD Splice@chr  | 1.49E-10 | 0.003084 |
| 22Feb2011 | 1328  | 561.26  | -12.4193 | 2 P.ACLTTDD Splice@chr  | 5.16E-10 | 0.009463 |
| 22Feb2011 | 980   | 561.26  | -12.4193 | 2 P.ACLTTDD Splice@chr  | 1.34E-10 | 0.003024 |
| 22Feb2011 | 466   | 561.26  | -12.4193 | 2 P.ACLTTDD Splice@chr  | 2.40E-10 | 0.005966 |
| 22Feb2011 | 430   | 561.26  | -12.4193 | 2 P.ACLTTDD Splice@chr  | 5.70E-11 | 0.001509 |
| 22Feb2011 | 2209  | 561.26  | -12.4193 | 2 P.ACLTTDD Splice@chr  | 1.90E-10 | 0.004561 |
| 22Feb2011 | 2165  | 561.26  | -12.4193 | 2 P.ACLTTDD Splice@chr  | 2.39E-10 | 0.004929 |
| 22Feb2011 | 2257  | 561.26  | -12.4193 | 2 P.ACLTTDD Splice@chr  | 2.09E-10 | 0.004561 |
| 22Feb2011 | 9524  | 728.35  | -1.51047 | 2 R.GCSWAS chrX@1319    | 2.61E-10 | 0.005524 |
| 22Feb2011 | 2556  | 555.27  | 7.850607 | 4 R.WK+14.0 Splice@chr  | 4.98E-10 | 0.009463 |
| 22Feb2011 | 15163 | 708.37  | -0.69028 | 2 _SWRHSTF Splice@chr   | 4.14E-10 | 0.009003 |
| 22Feb2011 | 25714 | 996.8   | -16.0836 | 3 R.SFK+14.0 Splice@chr | 2.60E-10 | 0.003686 |
| 22Feb2011 | 26620 | 996.8   | -16.0836 | 3 R.SFK+14.0 Splice@chr | 3.91E-10 | 0.009285 |
| 22Feb2011 | 24914 | 996.47  | -11.6085 | 3 R.SFK+14.0 Splice@chr | 1.54E-10 | 0.004106 |
| 22Feb2011 | 26075 | 996.47  | -11.6085 | 3 R.SFK+14.0 Splice@chr | 4.17E-10 | 0.007902 |
| 22Feb2011 | 26103 | 996.8   | -16.0836 | 3 R.SFK+14.0 Splice@chr | 1.05E-10 | 0.001962 |
| 22Feb2011 | 27774 | 996.81  | -6.02836 | 3 R.SFK+14.0 Splice@chr | 7.10E-11 | 0.001687 |
| 22Feb2011 | 27578 | 996.8   | -16.0836 | 3 R.SFK+14.0 Splice@chr | 1.01E-10 | 0.002341 |
| 22Feb2011 | 27527 | 996.8   | -16.0836 | 3 R.SFK+14.0 Splice@chr | 1.20E-11 | 4.05E-04 |
| 22Feb2011 | 23350 | 996.8   | -16.0836 | 3 R.SFK+14.0 Splice@chr | 4.57E-10 | 0.007955 |
| 22Feb2011 | 26002 | 996.8   | -16.0836 | 3 R.SFK+14.0 Splice@chr | 1.62E-10 | 0.003659 |
| 22Feb2011 | 19380 | 996.8   | -16.0836 | 3 R.SFK+14.0 Splice@chr | 2.31E-10 | 0.005535 |
| 22Feb2011 | 25524 | 996.81  | -6.02836 | 3 R.SFK+14.0 Splice@chr | 2.76E-12 | 1.30E-04 |
| 22Feb2011 | 26239 | 996.47  | -11.6085 | 3 R.SFK+14.0 Splice@chr | 1.23E-10 | 0.002215 |
| 22Feb2011 | 27777 | 996.8   | -16.0836 | 3 R.SFK+14.0 Splice@chr | 1.64E-11 | 0.001012 |
| 22Feb2011 | 28098 | 996.8   | -16.0836 | 3 R.SFK+14.0 Splice@chr | 2.13E-10 | 0.004561 |
| 22Feb2011 | 28759 | 996.47  | -11.6085 | 3 R.SFK+14.0 Splice@chr | 2.16E-10 | 0.00504  |
| 22Feb2011 | 15195 | 922.47  | -5.5989  | 2 R.FVTFVVG chrX@5768   | 1.39E-10 | 0.003237 |
| 22Feb2011 | 24563 | 960.48  | -15.5897 | 3 N.GFEPRLA Splice@chr  | 6.89E-12 | 4.13E-04 |
| 22Feb2011 | 24635 | 960.48  | -15.5897 | 3 N.GFEPRLA Splice@chr  | 5.51E-10 | 0.007765 |
| 22Feb2011 | 24522 | 960.48  | -15.5897 | 3 N.GFEPRLA Splice@chr  | 2.55E-10 | 0.003606 |
| 22Feb2011 | 25826 | 960.15  | -10.8603 | 3 N.GFEPRLA Splice@chr  | 6.03E-11 | 0.001602 |

|           |       |        |          |                        |          |          |
|-----------|-------|--------|----------|------------------------|----------|----------|
| 22Feb2011 | 25873 | 960.15 | -10.8603 | 3 N.GFEPRLA Splice@chr | 8.91E-11 | 0.002104 |
| 22Feb2011 | 26244 | 960.48 | -15.5897 | 3 N.GFEPRLA Splice@chr | 6.24E-12 | 5.61E-04 |
| 22Feb2011 | 26022 | 960.14 | -21.3812 | 3 N.GFEPRLA Splice@chr | 1.74E-11 | 3.94E-04 |
| 22Feb2011 | 26060 | 960.48 | -15.5897 | 3 N.GFEPRLA Splice@chr | 1.69E-10 | 0.002985 |
| 22Feb2011 | 26079 | 960.47 | -26.0257 | 3 N.GFEPRLA Splice@chr | 7.23E-11 | 0.002056 |
| 22Feb2011 | 26116 | 960.48 | -15.5897 | 3 N.GFEPRLA Splice@chr | 1.04E-10 | 0.00229  |
| 22Feb2011 | 25785 | 960.15 | -10.8603 | 3 N.GFEPRLA Splice@chr | 7.34E-11 | 0.002056 |
| 22Feb2011 | 25703 | 960.15 | -10.8603 | 3 N.GFEPRLA Splice@chr | 1.38E-10 | 0.003022 |
| 22Feb2011 | 24210 | 960.14 | -21.3812 | 3 N.GFEPRLA Splice@chr | 1.04E-10 | 0.003196 |
| 22Feb2011 | 24169 | 960.15 | -10.8603 | 3 N.GFEPRLA Splice@chr | 2.81E-10 | 0.007891 |
| 22Feb2011 | 25153 | 960.15 | -10.8603 | 3 N.GFEPRLA Splice@chr | 2.27E-12 | 0        |
| 22Feb2011 | 25195 | 960.48 | -15.5897 | 3 N.GFEPRLA Splice@chr | 5.70E-11 | 0.002623 |
| 22Feb2011 | 26413 | 960.48 | -15.5897 | 3 N.GFEPRLA Splice@chr | 9.55E-11 | 0.002654 |
| 22Feb2011 | 24580 | 960.15 | -10.8603 | 3 N.GFEPRLA Splice@chr | 3.19E-10 | 0.006509 |
| 22Feb2011 | 24179 | 960.15 | -10.8603 | 3 N.GFEPRLA Splice@chr | 1.32E-10 | 0.004142 |
| 22Feb2011 | 26485 | 960.48 | -15.5897 | 3 N.GFEPRLA Splice@chr | 6.02E-14 | 0        |
| 22Feb2011 | 26999 | 960.48 | -15.5897 | 3 N.GFEPRLA Splice@chr | 2.52E-12 | 3.46E-04 |
| 22Feb2011 | 26907 | 960.15 | -10.8603 | 3 N.GFEPRLA Splice@chr | 1.06E-10 | 0.001962 |
| 22Feb2011 | 26952 | 960.48 | -15.5897 | 3 N.GFEPRLA Splice@chr | 1.69E-12 | 2.37E-04 |
| 22Feb2011 | 26587 | 960.48 | -15.5897 | 3 N.GFEPRLA Splice@chr | 1.58E-10 | 0.003316 |
| 22Feb2011 | 26538 | 960.48 | -15.5897 | 3 N.GFEPRLA Splice@chr | 3.46E-12 | 4.51E-04 |
| 22Feb2011 | 26358 | 960.48 | -15.5897 | 3 N.GFEPRLA Splice@chr | 8.69E-14 | 0        |
| 22Feb2011 | 25943 | 960.15 | -10.8603 | 3 N.GFEPRLA Splice@chr | 1.04E-12 | 0        |
| 22Feb2011 | 25992 | 960.15 | -10.8603 | 3 N.GFEPRLA Splice@chr | 7.97E-12 | 5.83E-04 |
| 22Feb2011 | 26404 | 960.48 | -15.5897 | 3 N.GFEPRLA Splice@chr | 3.31E-12 | 3.41E-04 |
| 22Feb2011 | 26271 | 960.15 | -10.8603 | 3 N.GFEPRLA Splice@chr | 2.96E-10 | 0.005891 |
| 22Feb2011 | 26221 | 960.15 | -10.8603 | 3 N.GFEPRLA Splice@chr | 3.01E-11 | 9.50E-04 |
| 22Feb2011 | 25246 | 960.15 | -10.8603 | 3 N.GFEPRLA Splice@chr | 3.27E-10 | 0.006556 |
| 22Feb2011 | 25203 | 960.15 | -10.8603 | 3 N.GFEPRLA Splice@chr | 3.40E-11 | 6.43E-04 |
| 22Feb2011 | 26522 | 960.15 | -10.8603 | 3 N.GFEPRLA Splice@chr | 1.01E-10 | 0.002905 |
| 22Feb2011 | 26474 | 960.15 | -10.8603 | 3 N.GFEPRLA Splice@chr | 5.20E-12 | 2.00E-04 |
| 22Feb2011 | 27026 | 960.15 | -10.8603 | 3 N.GFEPRLA Splice@chr | 4.31E-10 | 0.008408 |
| 22Feb2011 | 26571 | 960.15 | -10.8603 | 3 N.GFEPRLA Splice@chr | 2.26E-10 | 0.004892 |
| 22Feb2011 | 24398 | 960.14 | -21.3812 | 3 N.GFEPRLA Splice@chr | 4.39E-12 | 0        |
| 22Feb2011 | 25751 | 960.15 | -10.8603 | 3 N.GFEPRLA Splice@chr | 4.67E-11 | 0.001048 |
| 22Feb2011 | 23939 | 960.15 | -10.8603 | 3 N.GFEPRLA Splice@chr | 1.32E-10 | 0.003024 |
| 22Feb2011 | 25901 | 960.15 | -10.8603 | 3 N.GFEPRLA Splice@chr | 1.45E-10 | 0.004231 |
| 22Feb2011 | 25948 | 960.15 | -10.8603 | 3 N.GFEPRLA Splice@chr | 2.76E-10 | 0.006776 |
| 22Feb2011 | 26240 | 960.47 | -26.0257 | 3 N.GFEPRLA Splice@chr | 1.04E-10 | 0.003054 |
| 22Feb2011 | 24760 | 960.14 | -21.3812 | 3 N.GFEPRLA Splice@chr | 1.62E-12 | 0        |
| 22Feb2011 | 24846 | 960.15 | -10.8603 | 3 N.GFEPRLA Splice@chr | 4.65E-10 | 0.008671 |
| 22Feb2011 | 25180 | 960.48 | -15.5897 | 3 N.GFEPRLA Splice@chr | 1.89E-12 | 0        |
| 22Feb2011 | 24804 | 960.15 | -10.8603 | 3 N.GFEPRLA Splice@chr | 8.14E-12 | 3.28E-04 |
| 22Feb2011 | 25893 | 960.15 | -10.8603 | 3 N.GFEPRLA Splice@chr | 4.81E-10 | 0.009895 |
| 22Feb2011 | 25937 | 960.15 | -10.8603 | 3 N.GFEPRLA Splice@chr | 1.91E-10 | 0.003744 |
| 22Feb2011 | 26340 | 960.48 | -15.5897 | 3 N.GFEPRLA Splice@chr | 6.30E-11 | 0.001166 |
| 22Feb2011 | 25486 | 960.15 | -10.8603 | 3 N.GFEPRLA Splice@chr | 1.34E-11 | 6.38E-04 |

|           |       |         |          |                         |          |          |
|-----------|-------|---------|----------|-------------------------|----------|----------|
| 22Feb2011 | 25443 | 960.15  | -10.8603 | 3 N.GFEPRLA Splice@chr  | 3.10E-12 | 1.24E-04 |
| 22Feb2011 | 26203 | 960.48  | -15.5897 | 3 N.GFEPRLA Splice@chr  | 2.58E-13 | 1.29E-04 |
| 22Feb2011 | 26715 | 960.15  | -10.8603 | 3 N.GFEPRLA Splice@chr  | 4.32E-11 | 0.001304 |
| 22Feb2011 | 26762 | 960.15  | -10.8603 | 3 N.GFEPRLA Splice@chr  | 5.43E-12 | 2.02E-04 |
| 22Feb2011 | 21349 | 627     | -3.05504 | 3 L.YVRLNCM Splice@chr  | 5.11E-11 | 9.84E-04 |
| 22Feb2011 | 22866 | 627.34  | 5.818712 | 3 L.YVRLNCM chrX@3295   | 1.50E-10 | 0.003413 |
| 22Feb2011 | 22454 | 627.34  | 5.818712 | 3 L.YVRLNCM Splice@chr  | 2.89E-10 | 0.005858 |
| 22Feb2011 | 22500 | 627     | -3.05504 | 3 L.YVRLNCM Splice@chr  | 1.08E-10 | 0.002276 |
| 22Feb2011 | 21439 | 627     | -3.05504 | 3 L.YVRLNCM Splice@chr  | 3.95E-11 | 0.001576 |
| 22Feb2011 | 23509 | 627.34  | 5.818712 | 3 L.YVRLNCM Splice@chr  | 2.79E-10 | 0.006113 |
| 22Feb2011 | 22881 | 627.34  | 5.818712 | 3 L.YVRLNCM Splice@chr  | 9.14E-11 | 0.002168 |
| 22Feb2011 | 24717 | 627.33  | -10.1715 | 3 L.YVRLNCM Splice@chr  | 3.19E-10 | 0.006821 |
| 22Feb2011 | 24768 | 627     | -3.05504 | 3 L.YVRLNCM Splice@chr  | 1.30E-10 | 0.003211 |
| 22Feb2011 | 23208 | 627.34  | 5.818712 | 3 L.YVRLNCM Splice@chr  | 2.88E-10 | 0.008468 |
| 22Feb2011 | 22599 | 627.33  | -10.1715 | 3 L.YVRLNCM Splice@chr  | 1.31E-10 | 0.004772 |
| 22Feb2011 | 22437 | 627     | -3.05504 | 3 L.YVRLNCM Splice@chr  | 9.48E-11 | 0.002515 |
| 22Feb2011 | 23679 | 627.33  | -10.1715 | 3 L.YVRLNCM Splice@chr  | 4.21E-10 | 0.008666 |
| 22Feb2011 | 22057 | 627     | -3.05504 | 3 L.YVRLNCM Splice@chr  | 1.48E-10 | 0.002748 |
| 22Feb2011 | 25131 | 627     | -3.05504 | 3 L.YVRLNCM Splice@chr  | 5.44E-10 | 0.009588 |
| 22Feb2011 | 23196 | 627.33  | -10.1715 | 3 L.YVRLNCM Splice@chr  | 4.49E-10 | 0.008619 |
| 22Feb2011 | 23900 | 627     | -3.05504 | 3 L.YVRLNCM Splice@chr  | 1.87E-10 | 0.004341 |
| 22Feb2011 | 23371 | 627     | -3.05504 | 3 L.YVRLNCM Splice@chr  | 4.05E-11 | 6.97E-04 |
| 22Feb2011 | 21513 | 627.33  | -10.1715 | 3 L.YVRLNCM Splice@chr  | 1.96E-10 | 0.004241 |
| 22Feb2011 | 21562 | 627.33  | -10.1715 | 3 L.YVRLNCM Splice@chr  | 1.95E-10 | 0.004241 |
| 22Feb2011 | 22876 | 627.34  | 5.818712 | 3 L.YVRLNCM Splice@chr  | 4.40E-10 | 0.009165 |
| 22Feb2011 | 22828 | 627.34  | 5.818712 | 3 L.YVRLNCM Splice@chr  | 1.08E-10 | 0.002149 |
| 22Feb2011 | 21307 | 627     | -3.05504 | 3 L.YVRLNCM Splice@chr  | 1.68E-10 | 0.003989 |
| 22Feb2011 | 21348 | 627.34  | 5.818712 | 3 L.YVRLNCM Splice@chr  | 2.46E-10 | 0.006041 |
| 22Feb2011 | 23103 | 627.34  | 5.818712 | 3 L.YVRLNCM chrX@3295   | 1.10E-10 | 0.002421 |
| 22Feb2011 | 23150 | 627     | -3.05504 | 3 L.YVRLNCM chrX@3295   | 5.68E-11 | 0.001083 |
| 22Feb2011 | 22468 | 627     | -3.05504 | 3 L.YVRLNCM Splice@chr  | 1.08E-10 | 0.00356  |
| 22Feb2011 | 22524 | 627     | -3.05504 | 3 L.YVRLNCM Splice@chr  | 3.74E-10 | 0.00944  |
| 22Feb2011 | 22523 | 627.33  | -10.1715 | 3 L.YVRLNCM Splice@chr  | 2.97E-10 | 0.007213 |
| 22Feb2011 | 22478 | 627.34  | 5.818712 | 3 L.YVRLNCM Splice@chr  | 1.49E-10 | 0.003219 |
| 22Feb2011 | 24843 | 627     | -3.05504 | 3 L.YVRLNCM Splice@chr  | 3.21E-10 | 0.006439 |
| 22Feb2011 | 25773 | 1070.9  | 10.04054 | 3 K.KNTSEITT chr5@3066  | 5.48E-10 | 0.009796 |
| 22Feb2011 | 28390 | 1070.89 | 0.608518 | 3 K.KNTSEITT chr5@3066  | 7.08E-11 | 0.002366 |
| 22Feb2011 | 9011  | 557.31  | -1.90174 | 3 K.IHTTFIYKI chrX@1281 | 4.61E-10 | 0.009617 |
| 22Feb2011 | 18031 | 763.12  | 8.088837 | 4 K.SVVNPEI' chrX@1545  | 3.81E-10 | 0.009677 |
| 22Feb2011 | 3488  | 416.24  | -19.2761 | 2 K.NKKGGG' chrX@1682   | 3.17E-10 | 0.007219 |
| 22Feb2011 | 20667 | 595.34  | 25.45039 | 3 K.SLYTFRTF chr1@5741  | 5.33E-10 | 0.009464 |
| 22Feb2011 | 25484 | 1049.61 | 2.010103 | 2 K.VQK+14.( chr4@1051  | 1.78E-10 | 0.002355 |
| 22Feb2011 | 13652 | 635.34  | -22.7502 | 3 K.FSVQLDV Splice@chr  | 4.28E-11 | 0.001265 |
| 22Feb2011 | 22    | 499.26  | 15.33014 | 2 R.AYTLVNC chr5@5971   | 1.41E-10 | 0.002996 |
| 22Feb2011 | 11527 | 493.78  | 13.31521 | 4 _K+14.016 chr5@1810   | 3.83E-10 | 0.007593 |
| 22Feb2011 | 24564 | 523.78  | 2.366413 | 4 K.AMIYPLIY chr2@2770  | 5.66E-10 | 0.009642 |
| 22Feb2011 | 22080 | 606.66  | 14.98224 | 3 R.RDSRRSV Splice@chr  | 2.31E-10 | 0.007255 |

|           |       |         |          |                          |          |          |
|-----------|-------|---------|----------|--------------------------|----------|----------|
| 22Feb2011 | 17666 | 839.2   | -4.57001 | 4 R.YDFLK+1 chr5@1107    | 5.19E-11 | 0.002426 |
| 22Feb2011 | 11661 | 613.82  | -8.66499 | 2 R.CILTHNG chr1@9418    | 8.95E-11 | 0.002968 |
| 22Feb2011 | 12419 | 633.34  | 8.274455 | 3 R.IIFAISSN chr4@3002   | 2.06E-10 | 0.003377 |
| 22Feb2011 | 21289 | 1012.53 | -20.0182 | 3 K.WAWHL1 chr5@5025     | 4.41E-10 | 0.008296 |
| 22Feb2011 | 25983 | 642.84  | -19.2089 | 4 L.MSLKIEEL chr3@2514   | 1.76E-10 | 0.004607 |
| 22Feb2011 | 27275 | 642.84  | -19.2089 | 4 L.MSLKIEEL chr3@2514   | 5.83E-11 | 0.00132  |
| 22Feb2011 | 27820 | 642.84  | -19.2089 | 4 L.MSLKIEEL chr3@2514   | 7.92E-11 | 0.001663 |
| 22Feb2011 | 2629  | 515.28  | -24.4104 | 2 K.ESNLKNP chr3@8379    | 3.70E-10 | 0.006815 |
| 22Feb2011 | 15121 | 630.02  | -19.7297 | 3 K.ILFFYIFV chr3@6375   | 3.65E-10 | 0.009322 |
| 22Feb2011 | 24905 | 731.37  | -25.6099 | 3 R.LK+14.01 chr5@1405   | 2.77E-10 | 0.004641 |
| 22Feb2011 | 15142 | 725.39  | -17.4939 | 2 K.IDFFQFF chr1@1409    | 6.90E-11 | 0.001981 |
| 22Feb2011 | 23280 | 812.19  | -12.8508 | 4 K.NYFRSRI chr3@8504    | 3.80E-10 | 0.007129 |
| 22Feb2011 | 21541 | 1029.83 | -15.6462 | 3 K.WTADM C Splice@chr   | 4.94E-12 | 2.56E-04 |
| 22Feb2011 | 24124 | 698.38  | -8.13945 | 2 K.K+14.016 chrX@1714   | 9.14E-12 | 3.31E-04 |
| 22Feb2011 | 9157  | 726.34  | -29.2826 | 2 R.RM+15.9 chrX@1392    | 4.33E-10 | 0.009919 |
| 22Feb2011 | 26967 | 794.73  | -13.4312 | 3 _KCSK+14. chr3@3136    | 3.67E-10 | 0.006871 |
| 22Feb2011 | 9967  | 682.35  | 17.82689 | 4 R.AM+15.9 Splice@chr   | 2.54E-10 | 0.005411 |
| 22Feb2011 | 16741 | 576.31  | -24.4006 | 3 K.SPEKRAK chr2@7954    | 3.99E-10 | 0.007907 |
| 22Feb2011 | 7072  | 573.3   | -6.45609 | 2 K.LEASDQK chrX@8588    | 1.37E-10 | 0.00493  |
| 22Feb2011 | 17412 | 714.86  | 7.292337 | 4 _SWSVCS C Splice@chr   | 3.21E-10 | 0.007494 |
| 22Feb2011 | 21609 | 797.94  | 0.729389 | 2 K.AIGCIVQ chr3@9160    | 2.81E-10 | 0.007474 |
| 22Feb2011 | 21996 | 797.94  | 0.729389 | 2 K.AIGCIVQ Splice@chr   | 2.11E-10 | 0.004561 |
| 22Feb2011 | 3592  | 416.26  | -1.32186 | 2 K.VLTGTA chr1@1034     | 1.80E-10 | 0.004192 |
| 22Feb2011 | 5033  | 572.35  | 16.02441 | 3 R.ALK+14.0 chr5@1575   | 2.78E-10 | 0.006342 |
| 22Feb2011 | 9115  | 578.31  | -1.40966 | 3 R.YILATHD C Splice@chr | 6.00E-10 | 0.009884 |
| 22Feb2011 | 2145  | 420.22  | 0.658525 | 2 R.EHGSPRR chr1@2404    | 3.18E-10 | 0.007295 |
| 22Feb2011 | 19608 | 891.46  | -12.8861 | 3 _VRQHRLS Splice@chr    | 2.44E-10 | 0.006332 |
| 22Feb2011 | 26509 | 833.89  | 13.4568  | 2 K.EADNDIV Splice@chr   | 1.81E-11 | 5.20E-04 |
| 22Feb2011 | 26557 | 833.89  | 13.4568  | 2 K.EADNDIV Splice@chr   | 4.78E-12 | 1.11E-04 |
| 22Feb2011 | 26516 | 833.89  | 13.4568  | 2 K.EADNDIV Splice@chr   | 2.15E-11 | 3.90E-04 |
| 22Feb2011 | 24641 | 833.89  | 13.4568  | 2 K.EADNDIV Splice@chr   | 2.23E-10 | 0.006518 |
| 22Feb2011 | 25642 | 833.89  | 13.4568  | 2 K.EADNDIV Splice@chr   | 2.50E-12 | 0        |
| 22Feb2011 | 26591 | 833.89  | 13.4568  | 2 K.EADNDIV Splice@chr   | 1.91E-10 | 0.004946 |
| 22Feb2011 | 26546 | 833.89  | 13.4568  | 2 K.EADNDIV Splice@chr   | 1.24E-10 | 0.003705 |
| 22Feb2011 | 25013 | 833.89  | 13.4568  | 2 K.EADNDIV Splice@chr   | 1.01E-10 | 0.002343 |
| 22Feb2011 | 27109 | 833.89  | 13.4568  | 2 K.EADNDIV Splice@chr   | 3.87E-11 | 0.001356 |
| 22Feb2011 | 25784 | 833.89  | 13.4568  | 2 K.EADNDIV Splice@chr   | 1.60E-10 | 0.002814 |
| 22Feb2011 | 27139 | 833.89  | 13.4568  | 2 K.EADNDIV Splice@chr   | 9.52E-12 | 3.85E-04 |
| 22Feb2011 | 27093 | 833.89  | 13.4568  | 2 K.EADNDIV Splice@chr   | 4.34E-10 | 0.008408 |
| 22Feb2011 | 27094 | 833.89  | 13.4568  | 2 K.EADNDIV Splice@chr   | 2.96E-10 | 0.005662 |
| 22Feb2011 | 27139 | 833.89  | 13.4568  | 2 K.EADNDIV Splice@chr   | 1.00E-10 | 0.002059 |
| 22Feb2011 | 26011 | 833.89  | 13.4568  | 2 K.EADNDIV Splice@chr   | 2.09E-11 | 6.38E-04 |
| 22Feb2011 | 26730 | 833.89  | 13.4568  | 2 K.EADNDIV Splice@chr   | 1.25E-10 | 0.003452 |
| 22Feb2011 | 15913 | 850.42  | -10.922  | 3 K.WEGSYD chrX@1768     | 2.36E-10 | 0.004743 |
| 22Feb2011 | 12508 | 484.31  | -7.26149 | 2 _ILILSPPK Splice@chr   | 5.85E-10 | 0.009958 |
| 22Feb2011 | 19978 | 840.72  | 26.45833 | 4 _TLLEALD C Splice@chr  | 3.17E-12 | 1.10E-04 |
| 22Feb2011 | 20161 | 840.72  | 26.45833 | 4 _TLLEALD C Splice@chr  | 4.43E-14 | 0        |

|           |       |         |          |                           |          |          |
|-----------|-------|---------|----------|---------------------------|----------|----------|
| 22Feb2011 | 20190 | 840.72  | 26.45833 | 4 _..TLLEALD\$ Splice@chr | 5.52E-15 | 0        |
| 22Feb2011 | 20126 | 840.72  | 26.45833 | 4 _..TLLEALD\$ Splice@chr | 3.49E-12 | 1.19E-04 |
| 22Feb2011 | 18822 | 840.72  | 26.45833 | 4 _..TLLEALD\$ Splice@chr | 4.23E-13 | 0        |
| 22Feb2011 | 18763 | 840.72  | 26.45833 | 4 _..TLLEALD\$ Splice@chr | 2.31E-16 | 0        |
| 22Feb2011 | 19593 | 840.72  | 26.45833 | 4 _..TLLEALD\$ Splice@chr | 1.09E-10 | 0.002435 |
| 22Feb2011 | 20404 | 840.72  | 26.45833 | 4 _..TLLEALD\$ Splice@chr | 3.57E-13 | 0        |
| 22Feb2011 | 20344 | 840.72  | 26.45833 | 4 _..TLLEALD\$ Splice@chr | 9.98E-11 | 0.002905 |
| 22Feb2011 | 18832 | 840.72  | 26.45833 | 4 _..TLLEALD\$ Splice@chr | 2.96E-12 | 0        |
| 22Feb2011 | 19910 | 840.97  | 25.45952 | 4 _..TLLEALD\$ Splice@chr | 4.31E-10 | 0.009008 |
| 22Feb2011 | 20148 | 840.72  | 26.45833 | 4 _..TLLEALD\$ Splice@chr | 5.64E-12 | 0        |
| 22Feb2011 | 19676 | 840.72  | 26.45833 | 4 _..TLLEALD\$ Splice@chr | 6.68E-13 | 0        |
| 22Feb2011 | 19734 | 840.72  | 26.45833 | 4 _..TLLEALD\$ Splice@chr | 3.56E-14 | 0        |
| 22Feb2011 | 20097 | 840.72  | 26.45833 | 4 _..TLLEALD\$ Splice@chr | 1.06E-12 | 1.29E-04 |
| 22Feb2011 | 20613 | 840.72  | 26.45833 | 4 _..TLLEALD\$ Splice@chr | 2.19E-11 | 3.68E-04 |
| 22Feb2011 | 15686 | 707.37  | -23.4019 | 4 R.CSSKTTQ chrX@108\$    | 4.50E-10 | 0.009793 |
| 22Feb2011 | 4413  | 432.75  | -4.87722 | 4 R.YPLIKPKV chr3@2950    | 5.51E-10 | 0.007765 |
| 22Feb2011 | 4351  | 432.75  | -4.87722 | 4 R.YPLIKPKV chr3@2950    | 4.37E-10 | 0.006535 |
| 22Feb2011 | 1318  | 546.29  | 24.59453 | 2 K.EEEEWKL chrX@1538     | 1.85E-10 | 0.00374  |
| 22Feb2011 | 5182  | 475.25  | -4.50449 | 4 R.TRTRELL1 chr5@1129    | 1.55E-10 | 0.003413 |
| 22Feb2011 | 2416  | 408.73  | 6.736451 | 2 R.VAAEAGI chr5@1764     | 4.87E-10 | 0.008298 |
| 22Feb2011 | 25997 | 1183.6  | 9.930092 | 3 K.SWSPYSC chrX@5576     | 4.18E-10 | 0.007417 |
| 22Feb2011 | 823   | 437.24  | -8.18493 | 2 K.LTDANIAI chr1@1293    | 1.43E-10 | 0.003344 |
| 22Feb2011 | 671   | 437.24  | -8.18493 | 2 K.LTDANIAI chr1@1293    | 2.52E-10 | 0.005524 |
| 22Feb2011 | 796   | 437.24  | -8.18493 | 2 K.LTDANIAI chr1@1293    | 4.51E-10 | 0.009542 |
| 22Feb2011 | 2881  | 437.24  | -8.18493 | 2 K.LTDANIAI chr1@1293    | 4.18E-10 | 0.008724 |
| 22Feb2011 | 2413  | 498.24  | -28.9067 | 2 R.TSASGST1 chr4@7898    | 1.51E-11 | 5.55E-04 |
| 22Feb2011 | 4159  | 477.75  | 29.12665 | 2 _..NTNIYSSF chr1@5741   | 5.24E-10 | 0.009866 |
| 22Feb2011 | 4939  | 477.75  | 29.12665 | 2 _..NTNIYSSF chr1@5741   | 4.59E-10 | 0.009499 |
| 22Feb2011 | 22742 | 799.93  | 28.21987 | 4 R.ENTPKTG chr4@3286     | 3.67E-10 | 0.00941  |
| 22Feb2011 | 25777 | 1175.65 | 8.61128  | 3 K.RFQKKKK chr2@1302     | 4.00E-10 | 0.008571 |
| 22Feb2011 | 24191 | 1082.89 | 11.88505 | 3 R.FAPCSGG chr2@6606     | 4.38E-10 | 0.008408 |
| 22Feb2011 | 18507 | 811.9   | -17.8385 | 2 R.ELAPVK+ chrX@5664     | 3.98E-10 | 0.007856 |
| 22Feb2011 | 17600 | 811.9   | -17.8385 | 2 R.ELAPVK+ chrX@5664     | 2.18E-10 | 0.003729 |
| 22Feb2011 | 19892 | 1054.54 | 24.7963  | 3 N.CQTKDS1 chrX@7221     | 4.61E-10 | 0.008954 |
| 22Feb2011 | 19010 | 1054.53 | 15.29491 | 3 N.CQTKDS1 chrX@7221     | 2.20E-10 | 0.00515  |
| 22Feb2011 | 53    | 424.22  | -12.2584 | 2 R.KYGSHQ1 Splice@chr    | 3.29E-10 | 0.008432 |
| 22Feb2011 | 11566 | 522.29  | -12.2939 | 2 K.PDSKAVE chr3@7030     | 4.13E-10 | 0.00896  |
| 22Feb2011 | 2236  | 419.7   | 27.04213 | 2 K.NYNGEGI Splice@chr    | 4.10E-10 | 0.007636 |
| 22Feb2011 | 19038 | 638.84  | 15.85135 | 2 R.NYSISFR1 Splice@chr   | 2.44E-10 | 0.005873 |
| 22Feb2011 | 18591 | 784.42  | 4.391702 | 3 K.TPTNHSN chrX@1022     | 1.98E-10 | 0.004389 |
| 22Feb2011 | 18646 | 784.42  | 4.391702 | 3 K.TPTNHSN chrX@1022     | 6.84E-11 | 0.002207 |
| 22Feb2011 | 19587 | 784.42  | 4.391702 | 3 K.TPTNHSN chrX@1022     | 2.48E-10 | 0.005524 |
| 22Feb2011 | 19847 | 784.42  | 4.391702 | 3 K.TPTNHSN chrX@1022     | 1.24E-11 | 3.68E-04 |
| 22Feb2011 | 15622 | 610.36  | 23.13842 | 2 K.VFGVVFS chr4@9658     | 2.04E-10 | 0.003728 |
| 22Feb2011 | 20925 | 821.14  | -4.73918 | 3 K.KNTSSKLI chr5@1643    | 3.34E-10 | 0.007148 |
| 22Feb2011 | 26935 | 960.14  | -12.8792 | 3 _..ENTKLSSI chr3@1362   | 1.06E-10 | 0.002978 |
| 22Feb2011 | 6690  | 677.95  | 14.30323 | 2 R.AIERVQK Splice@chr    | 3.42E-10 | 0.006581 |

|           |       |         |          |                         |          |          |
|-----------|-------|---------|----------|-------------------------|----------|----------|
| 22Feb2011 | 5535  | 467.24  | -8.60108 | 3 R.TIRNEETf chr3@2476  | 3.03E-10 | 0.006108 |
| 22Feb2011 | 12294 | 733.39  | 4.475505 | 3 _..HLMHAN chrX@1371   | 5.42E-10 | 0.008757 |
| 22Feb2011 | 18681 | 629.31  | -16.7485 | 3 K.NLLRSSV\ chrX@1225  | 4.83E-10 | 0.008374 |
| 22Feb2011 | 27344 | 1061.22 | -5.58523 | 3 K.LHDSGLC Splice@chr  | 6.39E-12 | 5.13E-04 |
| 22Feb2011 | 3123  | 485.77  | -4.09197 | 2 K.LKYSNFAI chrX@1251  | 3.02E-10 | 0.007466 |
| 22Feb2011 | 26738 | 853.1   | 18.14654 | 3 R.RTNLELS/ Splice@chr | 4.08E-10 | 0.00954  |
| 22Feb2011 | 15299 | 798.4   | -25.7945 | 2 K.FEWENL/ chr5@4248   | 2.37E-10 | 0.00493  |
| 22Feb2011 | 22316 | 709.38  | -27.9773 | 2 I.ENNTKKLI Splice@chr | 4.48E-10 | 0.008888 |
| 22Feb2011 | 12789 | 753.87  | -27.6326 | 4 R.EVDANDI chr4@1570   | 2.43E-10 | 0.006797 |
| 22Feb2011 | 26193 | 908.13  | 19.94715 | 3 K.NYCFNIIV chr4@9607  | 2.33E-10 | 0.005623 |
| 22Feb2011 | 23764 | 860.11  | 1.540749 | 3 _..VNYWK+ chr1@1011   | 2.41E-10 | 0.005169 |
| 22Feb2011 | 21032 | 1098.28 | -22.2369 | 3 K.KFKITFNC chr5@1929  | 4.16E-10 | 0.006129 |
| 22Feb2011 | 22278 | 1098.28 | -22.2369 | 3 K.KFKITFNC chr5@1929  | 2.19E-10 | 0.005029 |
| 22Feb2011 | 21494 | 1098.28 | -22.2369 | 3 K.KFKITFNC chr5@1929  | 1.04E-10 | 0.003024 |
| 22Feb2011 | 20861 | 960.02  | -16.738  | 4 R.M+15.99 chr3@1211   | 4.80E-10 | 0.009828 |
| 22Feb2011 | 1728  | 477.23  | 22.26288 | 2 R.YGEYGAf chr5@3578   | 5.61E-11 | 0.001422 |
| 22Feb2011 | 13002 | 730.14  | 11.13346 | 4 K.K+14.016 chr1@1370  | 2.83E-10 | 0.006261 |
| 22Feb2011 | 8240  | 525.24  | 3.376415 | 2 _..DSALNCD chr1@9127  | 2.86E-10 | 0.005807 |
| 22Feb2011 | 7375  | 456.27  | 28.28872 | 4 K.KLFPAAA chrX@1384   | 2.86E-10 | 0.005858 |
| 22Feb2011 | 24874 | 854.95  | 8.619081 | 2 E.YVTRYKSt chr5@1345  | 3.31E-10 | 0.008495 |
| 22Feb2011 | 20175 | 731.38  | -12.2668 | 4 R.PDM+15. chr2@2817   | 7.67E-11 | 0.001435 |
| 22Feb2011 | 1186  | 531.77  | -27.8281 | 2 K.TINVSEIN chr1@1094  | 4.02E-10 | 0.007925 |
| 22Feb2011 | 1121  | 531.77  | -27.8281 | 2 K.TINVSEIN chr1@1094  | 3.13E-10 | 0.005917 |
| 22Feb2011 | 191   | 531.77  | -27.8281 | 2 K.TINVSEIN chr1@1094  | 3.84E-10 | 0.009061 |
| 22Feb2011 | 24851 | 764.35  | -7.07946 | 2 K.M+15.99 chr2@1496   | 4.50E-10 | 0.008813 |
| 22Feb2011 | 20593 | 672.38  | 26.18307 | 2 R.ESLNEAI/ Splice@chr | 8.29E-11 | 0.002016 |
| 22Feb2011 | 20270 | 672.38  | 26.18307 | 2 R.ESLNEAI/ Splice@chr | 1.48E-10 | 0.002514 |
| 22Feb2011 | 20590 | 672.38  | 26.18307 | 2 R.ESLNEAI/ Splice@chr | 3.82E-10 | 0.007867 |
| 22Feb2011 | 19247 | 672.38  | 26.18307 | 2 R.ESLNEAI/ Splice@chr | 1.28E-10 | 0.003801 |
| 22Feb2011 | 20511 | 672.38  | 26.18307 | 2 R.ESLNEAI/ Splice@chr | 2.39E-10 | 0.007342 |
| 22Feb2011 | 20902 | 672.38  | 26.18307 | 2 R.ESLNEAI/ Splice@chr | 8.97E-11 | 0.002474 |
| 22Feb2011 | 19765 | 672.38  | 26.18307 | 2 R.ESLNEAI/ Splice@chr | 4.21E-11 | 0.001331 |
| 22Feb2011 | 19650 | 672.38  | 26.18307 | 2 R.ESLNEAI/ Splice@chr | 3.12E-10 | 0.008052 |
| 22Feb2011 | 20616 | 672.38  | 26.18307 | 2 R.ESLNEAI/ Splice@chr | 1.27E-10 | 0.004168 |
| 22Feb2011 | 19924 | 672.38  | 26.18307 | 2 R.ESLNEAI/ Splice@chr | 3.35E-10 | 0.006497 |
| 22Feb2011 | 20233 | 672.38  | 26.18307 | 2 R.ESLNEAI/ Splice@chr | 2.12E-10 | 0.005951 |
| 22Feb2011 | 20628 | 672.38  | 26.18307 | 2 R.ESLNEAI/ Splice@chr | 2.63E-10 | 0.00539  |
| 22Feb2011 | 26013 | 1036.55 | -16.3308 | 3 R.YK+14.01 chr1@8601  | 1.08E-10 | 0.0019   |
| 22Feb2011 | 16711 | 702.71  | 19.2915  | 3 K.TRCGTAE chr4@1544   | 3.35E-10 | 0.007523 |
| 22Feb2011 | 13535 | 560.31  | -1.47262 | 2 K.KCRVETG chr2@1481   | 6.75E-11 | 0.002185 |
| 22Feb2011 | 14175 | 560.31  | -1.47262 | 2 K.KCRVETG chr2@1481   | 2.40E-10 | 0.004475 |
| 22Feb2011 | 14122 | 560.31  | -1.47262 | 2 K.KCRVETG chr2@1481   | 5.06E-12 | 0        |
| 22Feb2011 | 15011 | 560.31  | -1.47262 | 2 K.KCRVETG chr2@1481   | 1.54E-10 | 0.00369  |
| 22Feb2011 | 14320 | 560.31  | -1.47262 | 2 K.KCRVETG chr2@1481   | 1.49E-10 | 0.003763 |
| 22Feb2011 | 16919 | 697.04  | -28.2772 | 3 R.MSREGLI chr5@1112   | 2.24E-10 | 0.005064 |
| 22Feb2011 | 20947 | 630     | 8.706776 | 3 R.M+15.99 Splice@chr  | 5.86E-11 | 0.001602 |
| 22Feb2011 | 20845 | 630     | 8.706776 | 3 R.M+15.99 Splice@chr  | 2.31E-10 | 0.00484  |

|           |       |         |          |                         |          |          |
|-----------|-------|---------|----------|-------------------------|----------|----------|
| 22Feb2011 | 20222 | 629.99  | -7.2158  | 3 R.M+15.99 Splice@chr  | 4.48E-11 | 0.001351 |
| 22Feb2011 | 20273 | 630     | 8.706776 | 3 R.M+15.99 Splice@chr  | 8.56E-11 | 0.001945 |
| 22Feb2011 | 21194 | 629.66  | -0.12945 | 3 R.M+15.99 Splice@chr  | 3.01E-10 | 0.006416 |
| 22Feb2011 | 20916 | 630     | 8.706776 | 3 R.M+15.99 Splice@chr  | 3.37E-10 | 0.006507 |
| 22Feb2011 | 21210 | 630     | 8.706776 | 3 R.M+15.99 Splice@chr  | 9.75E-11 | 0.001988 |
| 22Feb2011 | 21259 | 629.66  | -0.12945 | 3 R.M+15.99 Splice@chr  | 4.21E-10 | 0.0077   |
| 22Feb2011 | 19471 | 630     | 8.706776 | 3 R.M+15.99 Splice@chr  | 1.40E-10 | 0.003105 |
| 22Feb2011 | 20455 | 629.66  | -0.12945 | 3 R.M+15.99 Splice@chr  | 2.15E-10 | 0.005226 |
| 22Feb2011 | 20481 | 630     | 8.706776 | 3 R.M+15.99 Splice@chr  | 9.52E-11 | 0.002155 |
| 22Feb2011 | 24311 | 1081.2  | -29.2954 | 3 _GVFSLTTI Splice@chr  | 9.15E-11 | 0.002968 |
| 22Feb2011 | 5334  | 678.39  | -27.3009 | 2 K.YIYTLWKI chrX@1582  | 4.99E-10 | 0.009875 |
| 22Feb2011 | 23111 | 1086.81 | 10.36006 | 4 R.SKMLPRL Splice@chr  | 3.62E-10 | 0.009322 |
| 22Feb2011 | 3646  | 524.28  | 13.13697 | 2 K.ICKPGRCI chr2@1493  | 3.87E-10 | 0.006958 |
| 22Feb2011 | 5621  | 444.75  | -6.94605 | 2 K.FPPGFVP chr2@7217   | 1.95E-10 | 0.004561 |
| 22Feb2011 | 10246 | 750.56  | -5.65207 | 5 R.LAPSSPG Splice@chr  | 2.09E-10 | 0.003888 |
| 22Feb2011 | 9365  | 750.57  | 7.70576  | 5 R.LAPSSPG Splice@chr  | 4.79E-10 | 0.009079 |
| 22Feb2011 | 8646  | 750.57  | 7.70576  | 5 R.LAPSSPG Splice@chr  | 2.27E-11 | 9.24E-04 |
| 22Feb2011 | 9446  | 750.57  | 7.70576  | 5 R.LAPSSPG Splice@chr  | 3.73E-10 | 0.008344 |
| 22Feb2011 | 9395  | 750.57  | 7.70576  | 5 R.LAPSSPG Splice@chr  | 1.42E-10 | 0.003344 |
| 22Feb2011 | 9154  | 750.57  | 7.70576  | 5 R.LAPSSPG Splice@chr  | 4.04E-10 | 0.009901 |
| 22Feb2011 | 9692  | 750.57  | 7.70576  | 5 R.LAPSSPG Splice@chr  | 1.30E-10 | 0.004168 |
| 22Feb2011 | 9331  | 750.57  | 7.70576  | 5 R.LAPSSPG Splice@chr  | 7.68E-11 | 0.002638 |
| 22Feb2011 | 9390  | 750.57  | 7.70576  | 5 R.LAPSSPG Splice@chr  | 2.64E-11 | 7.50E-04 |
| 22Feb2011 | 9387  | 750.57  | 7.70576  | 5 R.LAPSSPG Splice@chr  | 9.31E-11 | 0.002363 |
| 22Feb2011 | 9479  | 750.57  | 7.70576  | 5 R.LAPSSPG Splice@chr  | 1.11E-10 | 0.003651 |
| 22Feb2011 | 9414  | 750.57  | 7.70576  | 5 R.LAPSSPG Splice@chr  | 3.80E-10 | 0.008322 |
| 22Feb2011 | 9362  | 750.57  | 7.70576  | 5 R.LAPSSPG Splice@chr  | 1.94E-11 | 5.28E-04 |
| 22Feb2011 | 9524  | 750.57  | 7.70576  | 5 R.LAPSSPG Splice@chr  | 2.06E-10 | 0.004561 |
| 22Feb2011 | 10053 | 750.57  | 7.70576  | 5 R.LAPSSPG Splice@chr  | 5.09E-10 | 0.009635 |
| 22Feb2011 | 10256 | 750.57  | 7.70576  | 5 R.LAPSSPG Splice@chr  | 1.53E-10 | 0.004036 |
| 22Feb2011 | 20792 | 969.49  | -27.5396 | 4 R.DRKHEQI Splice@chr  | 1.38E-10 | 0.003929 |
| 22Feb2011 | 15684 | 565.52  | -12.1778 | 5 R.IITQLLFKI chr4@4601 | 2.86E-10 | 0.005819 |
| 22Feb2011 | 15806 | 565.52  | -12.1778 | 5 R.IITQLLFKI chr4@4601 | 4.71E-11 | 8.72E-04 |
| 22Feb2011 | 15455 | 565.52  | -12.1778 | 5 R.IITQLLFKI chr4@4601 | 1.18E-10 | 0.003361 |
| 22Feb2011 | 1905  | 458.26  | -15.417  | 2 _ITALAPSS Splice@chr  | 3.35E-10 | 0.007251 |
| 22Feb2011 | 17816 | 715.09  | -28.0223 | 4 _K+14.016 Splice@chr  | 8.20E-11 | 0.001746 |
| 22Feb2011 | 16859 | 953.13  | -14.7696 | 3 _K+14.016 Splice@chr  | 4.98E-10 | 0.009246 |
| 22Feb2011 | 18528 | 856.44  | -25.9708 | 2 Q.K+14.016 chr2@1717  | 4.36E-10 | 0.007834 |
| 22Feb2011 | 6835  | 433.73  | 7.981081 | 2 K.FKDGAEE chr4@1129   | 4.21E-11 | 0.001204 |
| 22Feb2011 | 11681 | 614.73  | -23.1386 | 5 K.TWVNLG chr3@1279    | 3.07E-10 | 0.00897  |
| 22Feb2011 | 11568 | 515.61  | 28.07099 | 3 R.LQNSSKY Splice@chr  | 1.57E-10 | 0.003312 |
| 22Feb2011 | 8606  | 604.85  | 17.18355 | 2 K.KMDVTFI Splice@chr  | 2.45E-10 | 0.007419 |
| 22Feb2011 | 11424 | 577.85  | 2.010377 | 2 K.SPVSLGR chr4@1329   | 3.69E-10 | 0.007069 |
| 22Feb2011 | 22972 | 734.63  | -18.7871 | 4 N.K+14.016 chr3@1354  | 7.38E-11 | 0.001305 |
| 22Feb2011 | 6616  | 417.26  | 21.45935 | 4 R.AGEK+14 chr4@4773   | 4.44E-11 | 0.001497 |
| 22Feb2011 | 10520 | 531.27  | -6.9683  | 2 R.FAGTIVCI chr1@1476  | 3.05E-10 | 0.005037 |
| 22Feb2011 | 14014 | 648.86  | -13.0566 | 2 R.QM+15.9 chr3@9694   | 1.73E-10 | 0.003376 |

|           |       |        |          |                       |          |          |
|-----------|-------|--------|----------|-----------------------|----------|----------|
| 22Feb2011 | 12716 | 593.71 | 12.21818 | 5 _SVEMLTN Splice@chr | 8.49E-11 | 0.002213 |
| 22Feb2011 | 25619 | 953.26 | 0.337154 | 4 R.DVTM+ chr4@144    | 2.45E-10 | 0.005495 |
| 22Feb2011 | 20935 | 933.97 | -6.38077 | 2 L.FLCVFFVS chr2@849 | 3.15E-10 | 0.006693 |
| 22Feb2011 | 27148 | 789.5  | 4.67316  | 3 K.KPKSVGL chr2@311  | 2.03E-10 | 0.003993 |
| 22Feb2011 | 21158 | 614.01 | -16.6354 | 3 K.NMIIKSKI chr5@209 | 2.49E-10 | 0.003435 |
| 22Feb2011 | 21209 | 614.01 | -16.6354 | 3 K.NMIIKSKI chr5@209 | 2.44E-10 | 0.003273 |
| 22Feb2011 | 22734 | 614.01 | -16.6354 | 3 K.NMIIKSKI chr5@209 | 2.28E-10 | 0.004764 |
| 22Feb2011 | 22295 | 614.01 | -16.6354 | 3 K.NMIIKSKI chr5@209 | 4.29E-10 | 0.007834 |
| 22Feb2011 | 22353 | 614.01 | -16.6354 | 3 K.NMIIKSKI chr5@209 | 2.88E-10 | 0.005776 |
| 22Feb2011 | 22710 | 614.01 | -16.6354 | 3 K.NMIIKSKI chr5@209 | 2.39E-11 | 6.96E-04 |
| 22Feb2011 | 22413 | 614.01 | -16.6354 | 3 K.NMIIKSKI chr5@209 | 5.86E-11 | 0.002388 |
| 22Feb2011 | 21270 | 614.01 | -16.6354 | 3 K.NMIIKSKI chr5@209 | 2.29E-10 | 0.005552 |
| 22Feb2011 | 22630 | 613.67 | -25.702  | 3 K.NMIIKSKI chr5@209 | 2.17E-10 | 0.004512 |
| 22Feb2011 | 22092 | 613.67 | -25.702  | 3 K.NMIIKSKI chr5@209 | 1.14E-10 | 0.002476 |
| 22Feb2011 | 22939 | 614.01 | -16.6354 | 3 K.NMIIKSKI chr5@209 | 3.59E-10 | 0.008903 |
| 22Feb2011 | 21897 | 614.01 | -16.6354 | 3 K.NMIIKSKI chr5@209 | 4.21E-10 | 0.008666 |
| 22Feb2011 | 23161 | 614.01 | -16.6354 | 3 K.NMIIKSKI chr5@209 | 4.75E-10 | 0.009355 |
| 22Feb2011 | 23111 | 613.67 | -25.702  | 3 K.NMIIKSKI chr5@209 | 1.44E-10 | 0.003005 |
| 22Feb2011 | 22770 | 614.01 | -16.6354 | 3 K.NMIIKSKI chr5@209 | 3.92E-10 | 0.007783 |
| 22Feb2011 | 22717 | 614.01 | -16.6354 | 3 K.NMIIKSKI chr5@209 | 9.41E-11 | 0.0019   |
| 22Feb2011 | 21854 | 613.67 | -25.702  | 3 K.NMIIKSKI chr5@209 | 2.72E-10 | 0.004805 |
| 22Feb2011 | 23014 | 614.01 | -16.6354 | 3 K.NMIIKSKI chr5@209 | 4.71E-10 | 0.008877 |
| 22Feb2011 | 23064 | 614.01 | -16.6354 | 3 K.NMIIKSKI chr5@209 | 2.32E-10 | 0.004964 |
| 22Feb2011 | 23246 | 614.01 | -16.6354 | 3 K.NMIIKSKI chr5@209 | 3.77E-11 | 6.19E-04 |
| 22Feb2011 | 21360 | 613.67 | -25.702  | 3 K.NMIIKSKI chr5@209 | 8.04E-11 | 0.001928 |
| 22Feb2011 | 22689 | 614.01 | -16.6354 | 3 K.NMIIKSKI chr5@209 | 1.57E-10 | 0.00331  |
| 22Feb2011 | 22641 | 613.67 | -25.702  | 3 K.NMIIKSKI chr5@209 | 6.82E-11 | 0.001392 |
| 22Feb2011 | 21141 | 613.67 | -25.702  | 3 K.NMIIKSKI chr5@209 | 2.19E-10 | 0.00527  |
| 22Feb2011 | 22827 | 613.67 | -25.702  | 3 K.NMIIKSKI chr5@209 | 4.14E-10 | 0.009611 |
| 22Feb2011 | 22878 | 614.01 | -16.6354 | 3 K.NMIIKSKI chr5@209 | 4.34E-10 | 0.00999  |
| 22Feb2011 | 21910 | 614.01 | -16.6354 | 3 K.NMIIKSKI chr5@209 | 3.79E-10 | 0.006958 |
| 22Feb2011 | 22957 | 613.67 | -25.702  | 3 K.NMIIKSKI chr5@209 | 3.56E-10 | 0.007569 |
| 22Feb2011 | 22276 | 613.67 | -25.702  | 3 K.NMIIKSKI chr5@209 | 3.37E-10 | 0.007684 |
| 22Feb2011 | 22328 | 613.67 | -25.702  | 3 K.NMIIKSKI chr5@209 | 3.17E-10 | 0.007447 |
| 22Feb2011 | 22844 | 613.67 | -25.702  | 3 K.NMIIKSKI chr5@209 | 3.82E-10 | 0.007472 |
| 22Feb2011 | 22794 | 614.01 | -16.6354 | 3 K.NMIIKSKI chr5@209 | 2.82E-11 | 0.001163 |
| 22Feb2011 | 23273 | 613.67 | -25.702  | 3 K.NMIIKSKI chr5@209 | 3.31E-10 | 0.00718  |
| 22Feb2011 | 23533 | 613.67 | -25.702  | 3 K.NMIIKSKI chr5@209 | 1.47E-10 | 0.003957 |
| 22Feb2011 | 23588 | 614.01 | -16.6354 | 3 K.NMIIKSKI chr5@209 | 1.05E-10 | 0.003152 |
| 22Feb2011 | 14591 | 802.39 | -20.1826 | 4 R.ELQNDM chr1@383   | 2.41E-10 | 0.005873 |
| 22Feb2011 | 24270 | 966.5  | -27.646  | 3 R.K+14.016 chr4@850 | 1.53E-10 | 0.005507 |
| 22Feb2011 | 5748  | 562.3  | -24.7581 | 2 _SRTKMTS chrX@153   | 4.38E-10 | 0.008586 |
| 22Feb2011 | 14430 | 776.93 | 0        | 2 D.AILNEK chrX@788   | 4.37E-10 | 0.009868 |
| 22Feb2011 | 15650 | 690.37 | -13.6348 | 2 K.FWPVVS Splice@chr | 5.25E-10 | 0.007538 |
| 22Feb2011 | 2387  | 506.24 | -4.16779 | 4 K.STFSTSSS chr2@133 | 1.16E-10 | 0.002276 |
| 22Feb2011 | 25086 | 735.39 | -1.63428 | 3 R.HELGLS Splice@chr | 3.90E-11 | 0.001397 |
| 22Feb2011 | 24259 | 735.06 | 4.434593 | 3 R.HELGLS Splice@chr | 1.88E-10 | 0.004635 |

|           |       |         |          |                         |          |          |
|-----------|-------|---------|----------|-------------------------|----------|----------|
| 22Feb2011 | 25684 | 735.06  | 4.434593 | 3 R.HELGLS Splice@chr   | 3.02E-10 | 0.006849 |
| 22Feb2011 | 11750 | 500.28  | -12.9246 | 3 R.LHVHGLL Splice@chr  | 2.49E-10 | 0.005163 |
| 22Feb2011 | 12205 | 500.28  | -12.9246 | 3 R.LHVHGLL Splice@chr  | 5.43E-10 | 0.009405 |
| 22Feb2011 | 11657 | 500.28  | -12.9246 | 3 R.LHVHGLL chr2@1475   | 3.00E-10 | 0.006705 |
| 22Feb2011 | 11767 | 500.28  | -12.9246 | 3 R.LHVHGLL Splice@chr  | 3.15E-10 | 0.00834  |
| 22Feb2011 | 11946 | 500.28  | -12.9246 | 3 R.LHVHGLL Splice@chr  | 2.38E-11 | 0.001163 |
| 22Feb2011 | 12404 | 500.28  | -12.9246 | 3 R.LHVHGLL Splice@chr  | 2.30E-10 | 0.00565  |
| 22Feb2011 | 12473 | 500.28  | -12.9246 | 3 R.LHVHGLL chr2@1475   | 8.67E-11 | 0.002524 |
| 22Feb2011 | 27211 | 447.27  | 16.22812 | 2 _YLLGGLI chr3@1308    | 4.35E-10 | 0.009008 |
| 22Feb2011 | 16187 | 863.14  | 6.823499 | 3 R.IKKEYHM chr3@8478   | 5.38E-11 | 0.00132  |
| 22Feb2011 | 22541 | 869.8   | -24.62   | 3 R.FIYFLITNI chr5@1717 | 2.58E-10 | 0.005773 |
| 22Feb2011 | 6539  | 540.28  | -5.54582 | 4 _KNKMGS Splice@chr    | 3.96E-10 | 0.009336 |
| 22Feb2011 | 17740 | 722.45  | 13.42035 | 2 _EKKNK+1 chr5@1386    | 4.74E-10 | 0.009008 |
| 22Feb2011 | 17873 | 722.45  | 13.42035 | 2 _EKKNK+1 chr5@1386    | 1.87E-10 | 0.006491 |
| 22Feb2011 | 17922 | 722.45  | 13.42035 | 2 _EKKNK+1 chr5@1386    | 5.68E-10 | 0.009688 |
| 22Feb2011 | 5495  | 460.25  | 6.255701 | 2 K.NGGNGN chr4@1087    | 3.80E-11 | 7.21E-04 |
| 22Feb2011 | 13880 | 473.57  | 1.463792 | 3 R.RSPCSLG chr4@4255   | 3.30E-10 | 0.00718  |
| 1Mar2011- | 14822 | 929.51  | -8.25299 | 2 K.NCRNNA chr1@2857    | 2.25E-10 | 0.005718 |
| 22Feb2011 | 19563 | 785.06  | 24.18468 | 3 S.FFRKFYA chr2@1465   | 5.06E-10 | 0.009657 |
| 22Feb2011 | 1791  | 484.23  | -27.7871 | 3 R.DTMAIG chrX@1516    | 2.17E-10 | 0.005072 |
| 22Feb2011 | 25133 | 1165.14 | -3.6445  | 2 R.RRRRIFNI chr4@3035  | 5.40E-11 | 0.002096 |
| 22Feb2011 | 20247 | 759.45  | -18.8306 | 2 R.LNLKFPLI chr2@1206  | 3.70E-10 | 0.007069 |
| 22Feb2011 | 1062  | 582.31  | -23.7288 | 2 K.NKNGAA chrX@1641    | 1.32E-10 | 0.004168 |
| 22Feb2011 | 5731  | 458.3   | -16.4991 | 2 K.LKKVGEIK chrX@1372  | 3.06E-10 | 0.006146 |
| 22Feb2011 | 20723 | 757.06  | 18.51414 | 3 K.LSK+14.0 chrX@1314  | 3.37E-10 | 0.006691 |
| 22Feb2011 | 6126  | 454.75  | -3.76821 | 2 _ESKMVS\ chrX@4980    | 9.60E-11 | 0.002343 |
| 22Feb2011 | 6185  | 454.75  | -3.76821 | 2 _ESKMVS\ chrX@4980    | 5.98E-11 | 0.002605 |
| 22Feb2011 | 25277 | 848.47  | 16.63715 | 4 T.NWAAM- chr4@8902    | 1.77E-10 | 0.004999 |
| 22Feb2011 | 19841 | 749.75  | 20.97746 | 3 _TLLEALDS Splice@chr  | 2.24E-10 | 0.004869 |
| 1Mar2011- | 17092 | 1118.91 | -28.307  | 3 K.K+14.016 chr1@1235  | 3.10E-10 | 0.007989 |
| 22Feb2011 | 18405 | 986.14  | -29.7381 | 3 K.SEKKPAM chr5@1955   | 1.91E-10 | 0.003744 |
| 22Feb2011 | 5411  | 660.35  | -22.8951 | 3 K.NKGGRM chr5@1090    | 5.52E-10 | 0.009588 |
| 22Feb2011 | 3367  | 421.58  | 16.31722 | 3 R.LSDVSGA chr5@1769   | 4.61E-10 | 0.009271 |
| 22Feb2011 | 3745  | 421.58  | 16.31722 | 3 R.LSDVSGA chr5@1769   | 2.38E-11 | 7.42E-04 |
| 22Feb2011 | 24260 | 858.78  | -5.1006  | 3 _KFIQEKNI chr1@6776   | 4.34E-10 | 0.008522 |
| 22Feb2011 | 22882 | 858.45  | 0.09491  | 3 _KFIQEKNI chr1@6776   | 4.06E-10 | 0.008738 |
| 22Feb2011 | 22563 | 858.78  | -5.1006  | 3 _KFIQEKNI chr1@6776   | 1.68E-10 | 0.005219 |
| 22Feb2011 | 24316 | 858.45  | 0.09491  | 3 _KFIQEKNI chr1@6776   | 1.46E-10 | 0.003992 |
| 22Feb2011 | 4614  | 559.29  | -21.9742 | 2 K.STSVTRQ Splice@chr  | 3.96E-10 | 0.006608 |
| 22Feb2011 | 2098  | 573.82  | -5.59706 | 2 K.QTPITM+ chr2@6634   | 3.28E-10 | 0.007577 |
| 22Feb2011 | 16196 | 640.85  | -6.39115 | 2 R.LVYANGk chr5@3924   | 1.60E-10 | 0.003172 |
| 22Feb2011 | 14812 | 641.34  | -24.5613 | 2 R.LVYANGk chr5@3924   | 8.98E-11 | 0.002515 |
| 22Feb2011 | 15651 | 640.84  | -21.9398 | 2 R.LVYANGk chr5@3924   | 2.87E-10 | 0.005505 |
| 22Feb2011 | 15561 | 641.34  | -24.5613 | 2 R.LVYANGk chr5@3924   | 1.90E-10 | 0.00441  |
| 22Feb2011 | 14252 | 707.36  | 7.027978 | 3 K.PMK+14. chr2@6947   | 1.26E-10 | 0.003594 |
| 22Feb2011 | 20795 | 643.98  | -27.1296 | 3 R.RYSQFVN chr3@1102   | 4.33E-11 | 0.001331 |
| 22Feb2011 | 862   | 437.75  | -17.9759 | 2 R.LQTTSPV chrX@1575   | 3.24E-10 | 0.006843 |

|           |       |        |          |                         |          |          |
|-----------|-------|--------|----------|-------------------------|----------|----------|
| 22Feb2011 | 9235  | 504.78 | 4.361645 | 2 K.NLSVFVS: chrX@1706  | 1.17E-10 | 0.002554 |
| 22Feb2011 | 8746  | 504.78 | 4.361645 | 2 K.NLSVFVS: chrX@1706  | 4.42E-11 | 0.001351 |
| 22Feb2011 | 8812  | 504.78 | 4.361645 | 2 K.NLSVFVS: chrX@1706  | 4.77E-11 | 0.001557 |
| 22Feb2011 | 8923  | 504.78 | 4.361645 | 2 K.NLSVFVS: chrX@1706  | 4.42E-11 | 8.23E-04 |
| 22Feb2011 | 12993 | 439.74 | 20.65932 | 4 _SHERSGC chr5@1819    | 2.27E-10 | 0.005945 |
| 22Feb2011 | 23950 | 722.64 | 16.94393 | 4 K.LEMSM+ Splice@chr   | 5.16E-11 | 0.001847 |
| 1Mar2011- | 15037 | 879.5  | -27.2834 | 2 K.SYYLQK+: chr1@1326  | 1.79E-10 | 0.005034 |
| 22Feb2011 | 26946 | 812.46 | -2.60752 | 3 _NRAAVSk chr2@7352    | 5.74E-10 | 0.00976  |
| 22Feb2011 | 24472 | 918.93 | -16.091  | 2 R.NFRFGEC chr5@6493   | 3.49E-10 | 0.006747 |
| 22Feb2011 | 25414 | 918.93 | -16.091  | 2 R.NFRFGEC chr5@6493   | 5.49E-10 | 0.009588 |
| 22Feb2011 | 11246 | 661.7  | 10.26063 | 3 _ILMK+14. chr4@4818   | 5.78E-11 | 0.002385 |
| 22Feb2011 | 3010  | 582.31 | 6.674979 | 2 K.NWSLGP: chrX@1446   | 5.16E-11 | 0.001827 |
| 22Feb2011 | 636   | 456.89 | 2.67768  | 3 _DSYGQSE chr1@8980    | 1.31E-10 | 0.004772 |
| 22Feb2011 | 203   | 456.88 | -19.2793 | 3 _DSYGQSE chr1@8980    | 1.23E-10 | 0.003268 |
| 22Feb2011 | 159   | 456.89 | 2.67768  | 3 _DSYGQSE chr1@8980    | 6.33E-11 | 0.001814 |
| 22Feb2011 | 3628  | 585.81 | 21.50045 | 2 K.LFFSSPTM Splice@chr | 3.53E-10 | 0.008169 |
| 22Feb2011 | 662   | 480.18 | -20.1887 | 2 _FSNSCGC Splice@chr   | 4.84E-10 | 0.008884 |
| 22Feb2011 | 4998  | 663.38 | -28.9331 | 2 R.DNIKGIT: chr4@7335  | 3.94E-13 | 0        |
| 22Feb2011 | 5057  | 663.38 | -28.9331 | 2 R.DNIKGIT: chr4@7335  | 1.21E-12 | 1.10E-04 |
| 22Feb2011 | 453   | 558.79 | -3.611   | 2 K.LENSGNR chr2@4573   | 3.52E-10 | 0.006661 |
| 22Feb2011 | 12543 | 645.32 | 0.757834 | 2 R.IYNQSMF chr1@1428   | 1.68E-10 | 0.003739 |
| 22Feb2011 | 19080 | 787.42 | -22.5589 | 2 K.SRLEPNG chr2@6639   | 3.47E-10 | 0.008427 |
| 22Feb2011 | 548   | 427.21 | -5.44184 | 2 _YLSGSGN chrX@1111    | 2.22E-10 | 0.004215 |
| 22Feb2011 | 519   | 427.21 | -5.44184 | 2 _YLSGSGN chrX@1111    | 9.02E-11 | 0.002213 |
| 22Feb2011 | 375   | 427.21 | -5.44184 | 2 _YLSGSGN chrX@1111    | 4.70E-11 | 8.72E-04 |
| 22Feb2011 | 1369  | 427.21 | -5.44184 | 2 _YLSGSGN chrX@1111    | 1.74E-10 | 0.004607 |
| 22Feb2011 | 1329  | 427.21 | -5.44184 | 2 _YLSGSGN chrX@1111    | 5.15E-10 | 0.009721 |
| 22Feb2011 | 1364  | 427.21 | -5.44184 | 2 _YLSGSGN chrX@1111    | 8.02E-11 | 0.002006 |
| 22Feb2011 | 1248  | 427.21 | -5.44184 | 2 _YLSGSGN chrX@1111    | 2.32E-10 | 0.005154 |
| 22Feb2011 | 1319  | 427.21 | -5.44184 | 2 _YLSGSGN chrX@1111    | 2.40E-10 | 0.00524  |
| 22Feb2011 | 1283  | 427.21 | -5.44184 | 2 _YLSGSGN chrX@1111    | 1.36E-10 | 0.002755 |
| 22Feb2011 | 2459  | 427.21 | -5.44184 | 2 _YLSGSGN chrX@1111    | 2.94E-11 | 0.001136 |
| 22Feb2011 | 2360  | 427.21 | -5.44184 | 2 _YLSGSGN chrX@1111    | 2.33E-10 | 0.005928 |
| 22Feb2011 | 1064  | 427.21 | -5.44184 | 2 _YLSGSGN chrX@1111    | 5.74E-11 | 0.002385 |
| 22Feb2011 | 1027  | 427.21 | -5.44184 | 2 _YLSGSGN chrX@1111    | 1.70E-10 | 0.005393 |
| 22Feb2011 | 1278  | 427.21 | -5.44184 | 2 _YLSGSGN chrX@1111    | 6.19E-11 | 0.001419 |
| 22Feb2011 | 1245  | 427.21 | -5.44184 | 2 _YLSGSGN chrX@1111    | 4.52E-10 | 0.008852 |
| 22Feb2011 | 1213  | 427.21 | -5.44184 | 2 _YLSGSGN chrX@1111    | 6.06E-11 | 0.001419 |
| 22Feb2011 | 2279  | 427.21 | -5.44184 | 2 _YLSGSGN chrX@1111    | 2.39E-10 | 0.004816 |
| 22Feb2011 | 2099  | 427.21 | -5.44184 | 2 _YLSGSGN chrX@1111    | 2.94E-11 | 6.19E-04 |
| 22Feb2011 | 2185  | 427.21 | -5.44184 | 2 _YLSGSGN chrX@1111    | 3.14E-11 | 6.19E-04 |
| 22Feb2011 | 2140  | 427.21 | -5.44184 | 2 _YLSGSGN chrX@1111    | 2.94E-11 | 6.19E-04 |
| 22Feb2011 | 2231  | 427.21 | -5.44184 | 2 _YLSGSGN chrX@1111    | 2.87E-11 | 6.19E-04 |
| 22Feb2011 | 1161  | 427.21 | -5.44184 | 2 _YLSGSGN chrX@1111    | 2.01E-10 | 0.004018 |
| 22Feb2011 | 1223  | 427.21 | -5.44184 | 2 _YLSGSGN chrX@1111    | 3.07E-11 | 8.81E-04 |
| 22Feb2011 | 784   | 427.21 | -5.44184 | 2 _YLSGSGN chrX@1111    | 7.18E-11 | 0.001981 |
| 22Feb2011 | 698   | 427.21 | -5.44184 | 2 _YLSGSGN chrX@1111    | 4.94E-11 | 0.001127 |

|           |       |         |          |                         |          |          |
|-----------|-------|---------|----------|-------------------------|----------|----------|
| 22Feb2011 | 863   | 427.21  | -5.44184 | 2 _YLSGSGN chrX@1111    | 7.83E-11 | 0.00217  |
| 22Feb2011 | 714   | 427.21  | -5.44184 | 2 _YLSGSGN chrX@1111    | 7.08E-11 | 0.001981 |
| 22Feb2011 | 921   | 427.21  | -5.44184 | 2 _YLSGSGN chrX@1111    | 1.35E-10 | 0.003024 |
| 22Feb2011 | 891   | 427.21  | -5.44184 | 2 _YLSGSGN chrX@1111    | 3.57E-10 | 0.007913 |
| 22Feb2011 | 916   | 427.21  | -5.44184 | 2 _YLSGSGN chrX@1111    | 5.88E-11 | 0.001513 |
| 22Feb2011 | 22985 | 759.75  | 2.710377 | 3 K.YDRVPVS chrX@1395   | 5.87E-11 | 0.001509 |
| 22Feb2011 | 3966  | 422.74  | -20.1887 | 2 R.NQVSGVI chr5@6728   | 4.70E-10 | 0.008242 |
| 22Feb2011 | 4249  | 422.74  | -20.1887 | 2 R.NQVSGVI chr5@6728   | 1.15E-10 | 0.002373 |
| 22Feb2011 | 26881 | 786.42  | -6.81461 | 3 K.QARVRQ' chr1@6011   | 9.50E-11 | 0.0019   |
| 22Feb2011 | 25173 | 1081.54 | -4.9528  | 3 R.RFSCIAA' Splice@chr | 4.68E-10 | 0.00848  |
| 22Feb2011 | 10793 | 872.81  | 27.07139 | 3 _ICRRIYVC chr4@1747   | 2.30E-10 | 0.004837 |
| 22Feb2011 | 10627 | 872.81  | 27.07139 | 3 _ICRRIYVC chr4@1747   | 9.63E-11 | 0.002252 |
| 22Feb2011 | 10622 | 872.81  | 27.07139 | 3 _ICRRIYVC chr4@1747   | 3.41E-10 | 0.007747 |
| 22Feb2011 | 9988  | 872.81  | 27.07139 | 3 _ICRRIYVC chr4@1747   | 3.09E-11 | 7.35E-04 |
| 22Feb2011 | 10768 | 872.81  | 27.07139 | 3 _ICRRIYVC chr4@1747   | 6.08E-11 | 0.001907 |
| 22Feb2011 | 11262 | 872.81  | 27.07139 | 3 _ICRRIYVC chr4@1747   | 3.17E-10 | 0.007055 |
| 22Feb2011 | 24733 | 830.41  | -0.17091 | 3 R.FCTCSFSI chrX@1044  | 2.76E-10 | 0.006277 |
| 22Feb2011 | 27182 | 566.29  | -15.1815 | 2 K.WNNNW chr1@6874     | 3.27E-10 | 0.00718  |
| 22Feb2011 | 26107 | 1001.51 | 5.798116 | 3 K.VDGDfEk chrX@9705   | 6.25E-11 | 0.001112 |
| 22Feb2011 | 25196 | 1001.5  | -4.21003 | 3 K.VDGDfEk chrX@9705   | 4.42E-10 | 0.009239 |
| 22Feb2011 | 24497 | 1001.52 | 15.80626 | 3 K.VDGDfEk chrX@9705   | 3.47E-11 | 8.35E-04 |
| 22Feb2011 | 10429 | 747.37  | 25.66971 | 5 _YCSVVFG chr4@8267    | 3.46E-11 | 3.94E-04 |
| 22Feb2011 | 10783 | 747.37  | 25.66971 | 5 _YCSVVFG chr4@8267    | 4.37E-10 | 0.009171 |
| 22Feb2011 | 10262 | 747.37  | 25.66971 | 5 _YCSVVFG chr4@8267    | 1.89E-10 | 0.005492 |
| 22Feb2011 | 11572 | 747.36  | 12.18892 | 5 _YCSVVFG chr4@8267    | 2.97E-10 | 0.006312 |
| 22Feb2011 | 5795  | 472.29  | 29.3033  | 2 K.LPFGIGPI chrX@1364  | 3.00E-11 | 0.001279 |
| 22Feb2011 | 1754  | 471.77  | -9.65897 | 2 K.LPFGIGPI chrX@1364  | 1.03E-11 | 5.01E-04 |
| 22Feb2011 | 185   | 471.77  | -9.65897 | 2 K.LPFGIGPI chrX@1364  | 2.36E-10 | 0.005542 |
| 22Feb2011 | 1907  | 471.77  | -9.65897 | 2 K.LPFGIGPI chrX@1364  | 3.01E-11 | 7.62E-04 |
| 22Feb2011 | 3141  | 471.77  | -9.65897 | 2 K.LPFGIGPI chrX@1364  | 7.73E-12 | 3.85E-04 |
| 22Feb2011 | 317   | 471.77  | -9.65897 | 2 K.LPFGIGPI chrX@1364  | 4.39E-10 | 0.009088 |
| 22Feb2011 | 1414  | 471.77  | -9.65897 | 2 K.LPFGIGPI chrX@1364  | 8.60E-11 | 0.002863 |
| 22Feb2011 | 1311  | 471.77  | -9.65897 | 2 K.LPFGIGPI chrX@1364  | 1.98E-11 | 6.38E-04 |
| 22Feb2011 | 1451  | 471.77  | -9.65897 | 2 K.LPFGIGPI chrX@1364  | 1.82E-11 | 6.38E-04 |
| 22Feb2011 | 1154  | 471.77  | -9.65897 | 2 K.LPFGIGPI chrX@1364  | 3.84E-10 | 0.009749 |
| 22Feb2011 | 1557  | 471.77  | -9.65897 | 2 K.LPFGIGPI chrX@1364  | 3.53E-12 | 1.24E-04 |
| 22Feb2011 | 2938  | 471.77  | -9.65897 | 2 K.LPFGIGPI chrX@1364  | 2.26E-10 | 0.005586 |
| 22Feb2011 | 3050  | 471.77  | -9.65897 | 2 K.LPFGIGPI chrX@1364  | 1.50E-11 | 3.68E-04 |
| 22Feb2011 | 3188  | 471.77  | -9.65897 | 2 K.LPFGIGPI chrX@1364  | 3.53E-12 | 3.18E-04 |
| 22Feb2011 | 23098 | 823.42  | -27.5329 | 2 K.LNK+14.C chr2@1185  | 3.37E-10 | 0.008703 |
| 22Feb2011 | 371   | 464.27  | 6.324078 | 2 _LGTGVDF Splice@chr   | 4.84E-10 | 0.009665 |
| 22Feb2011 | 2953  | 413.22  | -7.79815 | 3 R.LFSGTSK- Splice@chr | 4.04E-10 | 0.009684 |
| 22Feb2011 | 9068  | 560.29  | -7.53    | 2 K.TRM+15. Splice@chr  | 1.71E-10 | 0.004073 |
| 22Feb2011 | 2286  | 471.26  | -24.7248 | 2 R.MVKTHG chr4@5755    | 1.13E-10 | 0.002435 |
| 22Feb2011 | 3261  | 471.26  | -24.7248 | 2 R.MVKTHG chr4@5755    | 5.30E-10 | 0.009189 |
| 22Feb2011 | 3480  | 471.26  | -24.7248 | 2 R.MVKTHG chr4@5755    | 5.29E-11 | 0.001522 |
| 22Feb2011 | 2792  | 471.26  | -24.7248 | 2 R.MVKTHG chr4@5755    | 3.31E-10 | 0.008062 |

|           |       |         |          |                         |          |          |
|-----------|-------|---------|----------|-------------------------|----------|----------|
| 22Feb2011 | 3485  | 471.26  | -24.7248 | 2 R.MVKTHG chr4@575     | 3.21E-10 | 0.007044 |
| 22Feb2011 | 3596  | 471.26  | -24.7248 | 2 R.MVKTHG chr4@575     | 2.60E-10 | 0.005757 |
| 22Feb2011 | 14508 | 566.31  | 3.455022 | 2 _K+14.016 chr2@1131   | 2.69E-10 | 0.005237 |
| 22Feb2011 | 17844 | 969.5   | -18.4417 | 2 Y.DNKFSS chr5@168     | 6.73E-11 | 0.001545 |
| 22Feb2011 | 1060  | 495.27  | -24.9438 | 3 _FLLFSSVA chr3@734    | 5.46E-10 | 0.0089   |
| 22Feb2011 | 6615  | 745.41  | -13.2826 | 2 K.KKFQKNF chr5@196    | 3.90E-10 | 0.00801  |
| 22Feb2011 | 6481  | 625.37  | 20.98769 | 2 R.QVFICILL chr4@139   | 3.35E-10 | 0.007597 |
| 22Feb2011 | 14861 | 587.84  | 17.85476 | 2 R.NLNISDKI chr3@5221  | 2.94E-10 | 0.00788  |
| 22Feb2011 | 14599 | 802.39  | 16.29901 | 2 R.CK+14.01 chr5@104   | 2.81E-10 | 0.007891 |
| 22Feb2011 | 5216  | 595.29  | -26.8393 | 3 R.FPMTVE1 chr1@913    | 4.08E-10 | 0.008237 |
| 22Feb2011 | 19225 | 1139.56 | 8.684521 | 2 R.DDRNTF\ chr3@961    | 1.28E-10 | 0.001943 |
| 22Feb2011 | 9470  | 505.72  | -5.02146 | 2 R.SSWENS\ chr2@636    | 4.41E-10 | 0.00737  |
| 22Feb2011 | 19922 | 758.15  | -21.0255 | 4 K.LIHKKN chrX@128     | 3.81E-10 | 0.007684 |
| 22Feb2011 | 18764 | 1081.53 | -28.7592 | 3 K.LTYSSK+1 chr1@858   | 2.19E-10 | 0.004848 |
| 22Feb2011 | 16064 | 689.38  | 6.472654 | 2 R.WK+14.0 chrX@155    | 6.91E-13 | 0        |
| 22Feb2011 | 17400 | 937.25  | 24.73174 | 4 K.ITVFEM+ chr5@746    | 3.62E-10 | 0.007822 |
| 22Feb2011 | 9663  | 582.82  | -18.3388 | 4 R.GGNKTGI chr3@1731   | 3.30E-10 | 0.008495 |
| 22Feb2011 | 2165  | 437.24  | -28.982  | 3 K.VILEVGS\ chr4@1961  | 1.03E-10 | 0.003007 |
| 22Feb2011 | 27204 | 1068.54 | -10.4056 | 1 K.ATYLATC\ Splice@chr | 1.10E-10 | 0.00221  |
| 22Feb2011 | 6661  | 669.87  | -15.9689 | 2 K.KFQTLGK chr4@124    | 4.83E-10 | 0.008763 |
| 24Mar2011 | 12812 | 953.26  | 8.717074 | 4 F.YRSK+14. chr5@158   | 5.96E-10 | 0.008008 |
| 22Feb2011 | 15311 | 975.52  | -21.4821 | 1 K.K+14.016 chr3@129   | 4.67E-10 | 0.008933 |
| 22Feb2011 | 17325 | 575.97  | 2.901581 | 3 R.VCMDVP chr4@152     | 1.94E-10 | 0.004472 |
| 22Feb2011 | 20444 | 871.95  | 9.481684 | 4 K.TLLEALD\ Splice@chr | 4.94E-11 | 8.23E-04 |
| 22Feb2011 | 18887 | 779.4   | -25.1957 | 3 R.MVLLSNS chr2@489    | 7.13E-11 | 0.001161 |
| 22Feb2011 | 26176 | 943     | -26.1014 | 4 _QARNVV\ Splice@chr   | 3.26E-10 | 0.006085 |
| 22Feb2011 | 1678  | 436.25  | -9.04492 | 2 R.DGLATRP chr1@233    | 2.45E-10 | 0.004912 |
| 22Feb2011 | 1642  | 436.25  | -9.04492 | 2 R.DGLATRP chr1@233    | 1.58E-10 | 0.003698 |
| 22Feb2011 | 1896  | 436.25  | -9.04492 | 2 R.DGLATRP chr1@233    | 3.19E-10 | 0.007055 |
| 22Feb2011 | 11520 | 669.85  | 27.2624  | 2 K.TRTEEME chrX@152    | 2.18E-10 | 0.006447 |
| 22Feb2011 | 680   | 478.26  | 0.642367 | 2 R.ISKNFSM chr2@334    | 4.01E-10 | 0.006762 |
| 22Feb2011 | 560   | 478.26  | 0.642367 | 2 R.ISKNFSM chr2@334    | 4.13E-10 | 0.006827 |
| 22Feb2011 | 480   | 478.26  | 0.642367 | 2 R.ISKNFSM chr2@334    | 5.89E-10 | 0.009731 |
| 22Feb2011 | 642   | 478.26  | 0.642367 | 2 R.ISKNFSM chr2@334    | 4.16E-10 | 0.006827 |
| 22Feb2011 | 25970 | 931.82  | 29.32282 | 3 _WWNDG Splice@chr     | 1.20E-10 | 0.003444 |
| 22Feb2011 | 6741  | 644.85  | -14.4661 | 2 _QLLALHM Splice@chr   | 2.04E-11 | 3.20E-04 |
| 22Feb2011 | 1506  | 604.82  | -24.0572 | 2 K.EQDRLH\ chr2@107    | 5.57E-10 | 0.007765 |
| 22Feb2011 | 2227  | 437.24  | 5.13022  | 3 R.TLHPSDG chr1@303    | 3.80E-11 | 0.001354 |
| 22Feb2011 | 1823  | 437.24  | 5.13022  | 3 R.TLHPSDG chr1@303    | 2.46E-10 | 0.004966 |
| 22Feb2011 | 1655  | 437.24  | 5.13022  | 3 R.TLHPSDG chr1@303    | 2.82E-10 | 0.00553  |
| 22Feb2011 | 1898  | 437.24  | 5.13022  | 3 R.TLHPSDG chr1@303    | 3.61E-10 | 0.006727 |
| 22Feb2011 | 22662 | 581.84  | -0.10508 | 2 N.SAEFILID Splice@chr | 6.47E-10 | 0.009339 |
| 22Feb2011 | 24446 | 581.84  | -0.10508 | 2 N.SAEFILID Splice@chr | 3.92E-10 | 0.008361 |
| 22Feb2011 | 15552 | 752.93  | 11.52658 | 2 T.QK+14.01 Splice@chr | 3.23E-10 | 0.008611 |
| 22Feb2011 | 20873 | 756.14  | 3.80152  | 3 R.DPK+14.( chr3@192   | 3.64E-10 | 0.00789  |
| 22Feb2011 | 20383 | 756.15  | 17.17091 | 3 R.DPK+14.( chr3@192   | 3.64E-10 | 0.008476 |
| 22Feb2011 | 24925 | 791.39  | 14.6445  | 2 K.SSNFQGk chr4@138    | 8.41E-11 | 0.002019 |

|           |       |         |          |                          |          |          |
|-----------|-------|---------|----------|--------------------------|----------|----------|
| 22Feb2011 | 7751  | 469.75  | 27.5069  | 2 R.YSTEGGV chr3@1298    | 2.61E-11 | 8.70E-04 |
| 22Feb2011 | 27476 | 487.33  | 7.342011 | 2 K.IIFGAVL chr2@5035    | 3.47E-10 | 0.007334 |
| 22Feb2011 | 9194  | 438.76  | 11.991   | 2 R.LIAPGMF Splice@chr   | 2.97E-10 | 0.005879 |
| 22Feb2011 | 14708 | 475.9   | -28.3602 | 3 K.ALSFFFFC chr5@1289   | 3.96E-10 | 0.007816 |
| 22Feb2011 | 1391  | 504.29  | 15.52334 | 2 R.WILPSTYI chr5@6540   | 2.85E-10 | 0.005636 |
| 22Feb2011 | 1325  | 504.29  | 15.52334 | 2 R.WILPSTYI chr5@6540   | 1.68E-10 | 0.003513 |
| 22Feb2011 | 1268  | 504.29  | 15.52334 | 2 R.WILPSTYI chr5@6540   | 1.59E-10 | 0.003195 |
| 22Feb2011 | 1357  | 504.29  | 15.52334 | 2 R.WILPSTYI chr5@6540   | 4.82E-10 | 0.009051 |
| 22Feb2011 | 3140  | 880.4   | 16.58833 | 2 R.ENFNTCT Splice@chr   | 4.25E-11 | 0.001659 |
| 22Feb2011 | 3913  | 423.73  | -5.99198 | 2 R.EAESGLLI chr3@1120   | 4.03E-10 | 0.00757  |
| 22Feb2011 | 10088 | 510.76  | -21.511  | 2 K.KMGGTG chr1@4061     | 3.14E-10 | 0.00834  |
| 22Feb2011 | 12817 | 749.35  | 8.775147 | 2 _FNEDEK+ chr1@4889     | 1.15E-10 | 0.003282 |
| 22Feb2011 | 13654 | 748.85  | 11.01815 | 2 _FNEDEK+ chr1@4889     | 2.19E-10 | 0.00515  |
| 22Feb2011 | 13379 | 748.85  | 11.01815 | 2 _FNEDEK+ chr1@4889     | 7.04E-11 | 0.001215 |
| 22Feb2011 | 13836 | 748.85  | 11.01815 | 2 _FNEDEK+ chr1@4889     | 3.62E-10 | 0.00816  |
| 22Feb2011 | 14914 | 748.85  | 11.01815 | 2 _FNEDEK+ chr1@4889     | 2.56E-10 | 0.005986 |
| 22Feb2011 | 15985 | 654.37  | -1.35394 | 2 K.LWRM+1 Splice@chr    | 4.24E-10 | 0.008477 |
| 22Feb2011 | 22433 | 1029.86 | -25.4567 | 3 K.IRLDCAH chr1@5945    | 1.86E-10 | 0.003139 |
| 22Feb2011 | 25223 | 968.19  | -3.36565 | 3 L.SAQRENK chr5@1368    | 3.79E-10 | 0.008909 |
| 22Feb2011 | 26045 | 1060.56 | -20.602  | 2 R.LFDSSFRI chr5@2265   | 2.40E-10 | 0.007342 |
| 22Feb2011 | 8517  | 568.28  | -14.9129 | 2 R.FYENK+1 chrX@1580    | 3.18E-10 | 0.007044 |
| 22Feb2011 | 21913 | 842.19  | -10.6504 | 4 K.LSAISGD chr5@1268    | 2.74E-10 | 0.004578 |
| 22Feb2011 | 5813  | 635.35  | -5.38818 | 2 K.HLVVEM chr5@8937     | 5.59E-10 | 0.009369 |
| 22Feb2011 | 22131 | 696.03  | -12.8797 | 3 _SELLNCN Splice@chr    | 9.36E-11 | 0.0019   |
| 22Feb2011 | 9900  | 630.36  | 26.96142 | 2 R.RTLGAGS Splice@chr   | 1.79E-11 | 9.75E-04 |
| 22Feb2011 | 21200 | 730.89  | 22.07704 | 2 K.PRSSSKHI chr1@2071   | 2.08E-10 | 0.004121 |
| 22Feb2011 | 19397 | 640.57  | 12.81787 | 4 R.GIFDCNP chr4@1246    | 6.30E-11 | 0.001892 |
| 22Feb2011 | 18521 | 640.57  | 12.81787 | 4 R.GIFDCNP chr4@1246    | 3.76E-10 | 0.009564 |
| 22Feb2011 | 14801 | 647.33  | -10.9543 | 2 _YRENDQC chr1@4434     | 3.19E-10 | 0.006428 |
| 22Feb2011 | 24818 | 1077.23 | -28.431  | 3 K.TRKNDEK chr1@2427    | 2.39E-10 | 0.005742 |
| 22Feb2011 | 21982 | 596.35  | 8.672221 | 2 K.ILGFELLSI chr1@1445  | 1.47E-10 | 0.003084 |
| 22Feb2011 | 26945 | 752.08  | -6.47592 | 3 K.IIEYIFTISF chr4@5297 | 5.12E-10 | 0.008974 |
| 22Feb2011 | 24331 | 735.44  | 6.399144 | 2 K.MEKITAK Splice@chr   | 2.17E-10 | 0.005064 |
| 22Feb2011 | 16806 | 601.59  | 16.802   | 4 _TLLEALDS Splice@chr   | 1.20E-11 | 4.13E-04 |
| 22Feb2011 | 16863 | 601.59  | 16.802   | 4 _TLLEALDS Splice@chr   | 1.36E-11 | 4.13E-04 |
| 22Feb2011 | 16754 | 601.59  | 16.802   | 4 _TLLEALDS Splice@chr   | 3.57E-11 | 6.09E-04 |
| 22Feb2011 | 18034 | 601.59  | 16.802   | 4 _TLLEALDS Splice@chr   | 8.20E-13 | 0        |
| 22Feb2011 | 17977 | 601.59  | 16.802   | 4 _TLLEALDS Splice@chr   | 2.29E-10 | 0.004837 |
| 22Feb2011 | 18153 | 601.59  | 16.802   | 4 _TLLEALDS Splice@chr   | 8.57E-11 | 0.002016 |
| 22Feb2011 | 18091 | 601.59  | 16.802   | 4 _TLLEALDS Splice@chr   | 3.25E-11 | 0.001279 |
| 22Feb2011 | 17780 | 601.59  | 16.802   | 4 _TLLEALDS Splice@chr   | 4.70E-12 | 1.20E-04 |
| 22Feb2011 | 17724 | 601.59  | 16.802   | 4 _TLLEALDS Splice@chr   | 8.41E-14 | 0        |
| 22Feb2011 | 17885 | 601.59  | 16.802   | 4 _TLLEALDS Splice@chr   | 6.33E-12 | 1.10E-04 |
| 22Feb2011 | 17944 | 601.59  | 16.802   | 4 _TLLEALDS Splice@chr   | 1.62E-12 | 1.10E-04 |
| 22Feb2011 | 18279 | 601.59  | 16.802   | 4 _TLLEALDS Splice@chr   | 4.94E-12 | 2.26E-04 |
| 22Feb2011 | 17929 | 601.59  | 16.802   | 4 _TLLEALDS Splice@chr   | 2.50E-11 | 0.001587 |
| 22Feb2011 | 16785 | 601.59  | 16.802   | 4 _TLLEALDS Splice@chr   | 4.16E-12 | 0        |

|           |       |        |          |                         |          |          |
|-----------|-------|--------|----------|-------------------------|----------|----------|
| 22Feb2011 | 16730 | 601.34 | 18.19908 | 4 _TLLEALD\$ Splice@chr | 7.94E-12 | 2.21E-04 |
| 22Feb2011 | 16903 | 601.34 | 18.19908 | 4 _TLLEALD\$ Splice@chr | 1.62E-10 | 0.004363 |
| 22Feb2011 | 16844 | 601.59 | 16.802   | 4 _TLLEALD\$ Splice@chr | 2.61E-13 | 0        |
| 22Feb2011 | 18075 | 601.59 | 16.802   | 4 _TLLEALD\$ Splice@chr | 7.43E-13 | 0        |
| 22Feb2011 | 18135 | 601.59 | 16.802   | 4 _TLLEALD\$ Splice@chr | 2.39E-12 | 1.11E-04 |
| 22Feb2011 | 18018 | 601.59 | 16.802   | 4 _TLLEALD\$ Splice@chr | 3.24E-12 | 1.11E-04 |
| 22Feb2011 | 18192 | 601.59 | 16.802   | 4 _TLLEALD\$ Splice@chr | 1.20E-11 | 2.04E-04 |
| 22Feb2011 | 18072 | 601.59 | 16.802   | 4 _TLLEALD\$ Splice@chr | 2.27E-11 | 5.73E-04 |
| 22Feb2011 | 18131 | 601.59 | 16.802   | 4 _TLLEALD\$ Splice@chr | 2.67E-13 | 0        |
| 22Feb2011 | 18489 | 601.59 | 16.802   | 4 _TLLEALD\$ Splice@chr | 2.84E-11 | 0.001136 |
| 22Feb2011 | 17504 | 601.59 | 16.802   | 4 _TLLEALD\$ Splice@chr | 5.36E-12 | 2.39E-04 |
| 22Feb2011 | 17457 | 601.59 | 16.802   | 4 _TLLEALD\$ Splice@chr | 3.33E-10 | 0.006686 |
| 22Feb2011 | 17318 | 601.59 | 16.802   | 4 _TLLEALD\$ Splice@chr | 1.25E-11 | 4.07E-04 |
| 22Feb2011 | 18407 | 601.59 | 16.802   | 4 _TLLEALD\$ Splice@chr | 5.19E-12 | 6.35E-04 |
| 22Feb2011 | 18290 | 601.59 | 16.802   | 4 _TLLEALD\$ Splice@chr | 6.46E-11 | 0.001523 |
| 22Feb2011 | 18341 | 601.59 | 16.802   | 4 _TLLEALD\$ Splice@chr | 3.99E-12 | 1.13E-04 |
| 22Feb2011 | 17323 | 601.59 | 16.802   | 4 _TLLEALD\$ Splice@chr | 4.16E-12 | 2.10E-04 |
| 22Feb2011 | 17379 | 601.59 | 16.802   | 4 _TLLEALD\$ Splice@chr | 2.89E-12 | 2.10E-04 |
| 22Feb2011 | 17437 | 601.59 | 16.802   | 4 _TLLEALD\$ Splice@chr | 6.88E-11 | 0.001215 |
| 22Feb2011 | 18430 | 601.59 | 16.802   | 4 _TLLEALD\$ Splice@chr | 8.58E-12 | 3.85E-04 |
| 22Feb2011 | 18491 | 601.59 | 16.802   | 4 _TLLEALD\$ Splice@chr | 1.45E-11 | 4.62E-04 |
| 22Feb2011 | 18368 | 601.59 | 16.802   | 4 _TLLEALD\$ Splice@chr | 1.12E-11 | 4.62E-04 |
| 22Feb2011 | 18307 | 601.59 | 16.802   | 4 _TLLEALD\$ Splice@chr | 4.40E-11 | 6.97E-04 |
| 22Feb2011 | 18423 | 601.59 | 16.802   | 4 _TLLEALD\$ Splice@chr | 6.56E-11 | 0.001276 |
| 22Feb2011 | 18363 | 601.59 | 16.802   | 4 _TLLEALD\$ Splice@chr | 4.67E-13 | 0        |
| 22Feb2011 | 16810 | 601.59 | 16.802   | 4 _TLLEALD\$ Splice@chr | 1.68E-12 | 0        |
| 22Feb2011 | 18161 | 601.59 | 16.802   | 4 _TLLEALD\$ Splice@chr | 7.48E-11 | 0.001479 |
| 22Feb2011 | 18218 | 601.59 | 16.802   | 4 _TLLEALD\$ Splice@chr | 3.72E-12 | 1.16E-04 |
| 22Feb2011 | 18277 | 601.59 | 16.802   | 4 _TLLEALD\$ Splice@chr | 1.03E-10 | 0.002149 |
| 22Feb2011 | 16923 | 601.59 | 16.802   | 4 _TLLEALD\$ Splice@chr | 7.33E-13 | 0        |
| 22Feb2011 | 16976 | 601.59 | 16.802   | 4 _TLLEALD\$ Splice@chr | 1.38E-11 | 5.46E-04 |
| 22Feb2011 | 18283 | 601.59 | 16.802   | 4 _TLLEALD\$ Splice@chr | 1.03E-12 | 0        |
| 22Feb2011 | 18224 | 601.59 | 16.802   | 4 _TLLEALD\$ Splice@chr | 1.07E-13 | 0        |
| 22Feb2011 | 17593 | 601.59 | 16.802   | 4 _TLLEALD\$ Splice@chr | 3.57E-10 | 0.006576 |
| 22Feb2011 | 17538 | 601.59 | 16.802   | 4 _TLLEALD\$ Splice@chr | 3.92E-13 | 0        |
| 22Feb2011 | 17482 | 601.59 | 16.802   | 4 _TLLEALD\$ Splice@chr | 8.12E-12 | 3.28E-04 |
| 22Feb2011 | 17759 | 601.59 | 16.802   | 4 _TLLEALD\$ Splice@chr | 1.40E-11 | 6.76E-04 |
| 22Feb2011 | 17640 | 601.59 | 16.802   | 4 _TLLEALD\$ Splice@chr | 5.16E-12 | 2.48E-04 |
| 22Feb2011 | 17698 | 601.59 | 16.802   | 4 _TLLEALD\$ Splice@chr | 1.58E-12 | 0        |
| 22Feb2011 | 17989 | 601.59 | 16.802   | 4 _TLLEALD\$ Splice@chr | 1.02E-10 | 0.002421 |
| 22Feb2011 | 18046 | 601.59 | 16.802   | 4 _TLLEALD\$ Splice@chr | 2.52E-13 | 0        |
| 22Feb2011 | 18105 | 601.59 | 16.802   | 4 _TLLEALD\$ Splice@chr | 2.54E-10 | 0.004982 |
| 22Feb2011 | 17845 | 601.59 | 16.802   | 4 _TLLEALD\$ Splice@chr | 5.83E-12 | 4.53E-04 |
| 22Feb2011 | 17903 | 601.59 | 16.802   | 4 _TLLEALD\$ Splice@chr | 7.32E-11 | 0.002224 |
| 22Feb2011 | 17774 | 601.59 | 16.802   | 4 _TLLEALD\$ Splice@chr | 2.51E-10 | 0.005753 |
| 22Feb2011 | 17718 | 601.59 | 16.802   | 4 _TLLEALD\$ Splice@chr | 3.05E-12 | 0        |
| 22Feb2011 | 17663 | 601.59 | 16.802   | 4 _TLLEALD\$ Splice@chr | 5.41E-11 | 9.17E-04 |

|           |       |         |          |                           |          |          |
|-----------|-------|---------|----------|---------------------------|----------|----------|
| 22Feb2011 | 18117 | 601.59  | 16.802   | 4 _..TLLEALD\$ Splice@chr | 2.61E-12 | 2.26E-04 |
| 22Feb2011 | 18177 | 601.59  | 16.802   | 4 _..TLLEALD\$ Splice@chr | 1.87E-11 | 0.001087 |
| 22Feb2011 | 18236 | 601.59  | 16.802   | 4 _..TLLEALD\$ Splice@chr | 4.72E-10 | 0.009317 |
| 22Feb2011 | 18603 | 601.59  | 16.802   | 4 _..TLLEALD\$ Splice@chr | 1.58E-11 | 3.68E-04 |
| 22Feb2011 | 18660 | 601.59  | 16.802   | 4 _..TLLEALD\$ Splice@chr | 3.45E-12 | 1.06E-04 |
| 22Feb2011 | 18784 | 601.59  | 16.802   | 4 _..TLLEALD\$ Splice@chr | 2.40E-11 | 0.001182 |
| 22Feb2011 | 1847  | 452.57  | -6.48785 | 3 K.ISSGKSNE Splice@chr   | 3.58E-10 | 0.006576 |
| 22Feb2011 | 20569 | 582.65  | -6.26351 | 3 R.ISAAAK\$ Splice@chr   | 2.89E-10 | 0.006259 |
| 22Feb2011 | 17029 | 504.25  | 0.485136 | 4 R.YQTGQM Splice@chr     | 2.20E-10 | 0.007088 |
| 22Feb2011 | 9016  | 516.8   | -21.9696 | 2 R.NFRNVLL chr2@1307     | 3.79E-10 | 0.007593 |
| 22Feb2011 | 3327  | 839.41  | 23.87877 | 1 R.FTNNSEK Splice@chr    | 3.90E-10 | 0.00848  |
| 22Feb2011 | 19847 | 1035.51 | 0.707995 | 1 R.AMRRCA Splice@chr     | 6.07E-10 | 0.008808 |
| 22Feb2011 | 9958  | 483.24  | 0.421893 | 3 K.MPETGIC chr5@4024     | 1.94E-10 | 0.00477  |
| 22Feb2011 | 5047  | 627.29  | -12.2793 | 2 R.SWNSST\$ chr5@1315    | 2.43E-11 | 5.28E-04 |
| 22Feb2011 | 21247 | 956.52  | 17.37482 | 4 K.ADLVPHK chr4@1695     | 3.95E-10 | 0.007129 |
| 22Feb2011 | 19565 | 1020.49 | -25.1318 | 3 K.VQKM+1 chr3@1195      | 5.51E-10 | 0.009876 |
| 22Feb2011 | 23597 | 863.46  | -23.2118 | 3 K.LTDRAFLI chr3@1236    | 7.34E-11 | 0.002159 |
| 22Feb2011 | 1448  | 469.56  | -8.68415 | 3 R.SADSQG\$ chrX@1987    | 6.32E-11 | 0.001814 |
| 22Feb2011 | 25692 | 760.4   | -14.4671 | 3 K.MICNVIG chrX@1272     | 2.58E-10 | 0.004648 |
| 22Feb2011 | 26390 | 740.05  | -1.21127 | 3 R.EIWDGA\$ chr2@7644    | 4.79E-10 | 0.008298 |
| 22Feb2011 | 2817  | 501.26  | 2.444778 | 2 R.IPTSNEP\$ chrX@4924   | 4.95E-10 | 0.008981 |
| 22Feb2011 | 8742  | 410.24  | -14.5415 | 2 R.VVISHHK Splice@chr    | 4.41E-10 | 0.008386 |
| 22Feb2011 | 16333 | 1026.52 | -22.1198 | 2 R.QTCK+14 chr5@1815     | 4.21E-10 | 0.009905 |
| 22Feb2011 | 18356 | 1026.53 | -12.3545 | 2 R.QTCK+14 chr5@1815     | 4.28E-10 | 0.009011 |
| 22Feb2011 | 23744 | 895.22  | 7.254865 | 4 _..FMMMTI Splice@chr    | 9.55E-11 | 0.002421 |
| 22Feb2011 | 22015 | 573.64  | -6.67941 | 3 K.NGQKMC chr1@1212      | 5.27E-11 | 0.001474 |
| 22Feb2011 | 22667 | 910.46  | -6.96415 | 4 K.TNAERAC chr5@1834     | 4.67E-10 | 0.009097 |
| 22Feb2011 | 21465 | 780.06  | -3.83964 | 3 _..SREKSIG\$ chrX@1475  | 2.12E-10 | 0.005198 |
| 22Feb2011 | 5459  | 544.63  | -27.4692 | 3 R.VVITSSD\$ Splice@chr  | 1.60E-10 | 0.003574 |
| 22Feb2011 | 1649  | 414.23  | 10.38402 | 4 K.KGFNPG\$ chr4@1405    | 6.18E-11 | 0.001907 |
| 22Feb2011 | 13078 | 583.82  | -26.2537 | 2 K.KRWQTY chr5@1368      | 7.98E-11 | 0.001928 |
| 22Feb2011 | 6972  | 520.29  | -28.7567 | 3 _..LIIGGGV. Splice@chr  | 3.05E-11 | 7.16E-04 |
| 22Feb2011 | 20595 | 937.49  | -5.38777 | 3 K.IYSCLK+1 chr5@6936    | 2.74E-10 | 0.004578 |
| 22Feb2011 | 16556 | 751.38  | 9.646744 | 2 K.YTWMGC chrX@2097      | 2.42E-10 | 0.004691 |
| 22Feb2011 | 1900  | 495.29  | -27.5976 | 2 _..ATITTNLk chr1@9520   | 1.59E-10 | 0.002865 |
| 22Feb2011 | 1939  | 495.29  | -27.5976 | 2 _..ATITTNLk chr1@9520   | 1.08E-10 | 0.002276 |
| 22Feb2011 | 345   | 495.29  | -27.5976 | 2 _..ATITTNLk chr1@9520   | 4.18E-10 | 0.007689 |
| 22Feb2011 | 25278 | 808.42  | 0.624506 | 4 R.EISIPASC chr1@1041    | 4.41E-10 | 0.007911 |
| 22Feb2011 | 26056 | 1008.54 | -18.2228 | 4 _..GRRLRNV Splice@chr   | 8.02E-11 | 0.002523 |
| 22Feb2011 | 3830  | 581.29  | -18.6168 | 2 R.EKNQIEC Splice@chr    | 4.38E-10 | 0.009868 |
| 22Feb2011 | 745   | 472.28  | 6.151833 | 2 K.IGSTEIPV Splice@chr   | 2.01E-10 | 0.004801 |
| 22Feb2011 | 12582 | 710.35  | -16.0569 | 2 R.NFCNIPV chr3@1197     | 7.32E-11 | 0.001228 |
| 22Feb2011 | 20083 | 546.31  | -29.2936 | 2 R.TKNLGRL chr2@1194     | 3.96E-10 | 0.007856 |
| 22Feb2011 | 7095  | 458.27  | 25.05788 | 2 _..NGGGDLI chr2@1095    | 3.81E-10 | 0.00768  |
| 22Feb2011 | 6662  | 458.27  | 25.05788 | 2 _..NGGGDLI chr2@1095    | 1.81E-11 | 3.29E-04 |
| 22Feb2011 | 6925  | 458.27  | 25.05788 | 2 _..NGGGDLI chr2@1095    | 1.75E-10 | 0.004092 |
| 22Feb2011 | 6851  | 458.27  | 25.05788 | 2 _..NGGGDLI chr2@1095    | 1.78E-10 | 0.003658 |

|           |       |         |          |                         |          |          |
|-----------|-------|---------|----------|-------------------------|----------|----------|
| 22Feb2011 | 24497 | 955.51  | -9.7008  | 3 R.IDTQKSN chr5@2898   | 4.10E-11 | 0.001837 |
| 22Feb2011 | 26605 | 955.18  | -5.03201 | 3 R.IDTQKSN chr5@2898   | 1.13E-10 | 0.002423 |
| 22Feb2011 | 16262 | 772.74  | -27.9286 | 3 N.LPTSKPG chr3@4625   | 1.86E-10 | 0.003573 |
| 22Feb2011 | 12874 | 599.64  | 10.23677 | 3 K.FTENRQS chr5@1788   | 2.54E-10 | 0.005952 |
| 22Feb2011 | 1202  | 457.21  | -22.8329 | 3 R.ISM+15.9 Splice@chr | 2.98E-10 | 0.00718  |
| 22Feb2011 | 19905 | 666.87  | -2.61276 | 2 K.TSWAKAI Splice@chr  | 4.52E-10 | 0.009005 |
| 22Feb2011 | 4430  | 411.55  | -16.0561 | 3 _ALFVNHF Splice@chr   | 4.89E-10 | 0.008466 |
| 22Feb2011 | 1699  | 476.23  | -20.9345 | 2 R.FCLAGDL Splice@chr  | 2.19E-10 | 0.00449  |
| 22Feb2011 | 2690  | 409.74  | -11.6591 | 2 K.IVNSSGLI chr5@6788  | 4.07E-10 | 0.008724 |
| 22Feb2011 | 89    | 402.25  | 12.72038 | 2 K.KVSAAAC chr4@1545   | 1.14E-10 | 0.002458 |
| 22Feb2011 | 5565  | 888.48  | 1.169162 | 1 R.DLSADVL chr1@7088   | 3.60E-10 | 0.007822 |
| 22Feb2011 | 24081 | 859.78  | 14.59378 | 3 K.VNDTCEN chr2@1006   | 5.37E-10 | 0.009838 |
| 22Feb2011 | 25468 | 1148.57 | -12.9774 | 2 _SNYSTRM chr2@2978    | 2.54E-10 | 0.005773 |
| 22Feb2011 | 27268 | 786.75  | 17.03739 | 4 K.KIFSILFKI chr2@1210 | 4.41E-10 | 0.008342 |
| 22Feb2011 | 2972  | 556.8   | 9.070062 | 2 K.INFFLENS chr2@1389  | 3.73E-10 | 0.007069 |
| 22Feb2011 | 2927  | 556.8   | 9.070062 | 2 K.INFFLENS chr2@1389  | 4.19E-10 | 0.007689 |
| 22Feb2011 | 3027  | 556.8   | 9.070062 | 2 K.INFFLENS chr2@1389  | 5.27E-10 | 0.008748 |
| 22Feb2011 | 22715 | 619.32  | -14.3855 | 3 K.EIK+14.0: chr5@7582 | 1.38E-11 | 4.83E-04 |
| 22Feb2011 | 22661 | 619.32  | -14.3855 | 3 K.EIK+14.0: chr5@7582 | 2.93E-11 | 9.46E-04 |
| 22Feb2011 | 23787 | 619.32  | -14.3855 | 3 K.EIK+14.0: chr5@7582 | 1.66E-11 | 8.51E-04 |
| 22Feb2011 | 22928 | 618.99  | -7.17689 | 3 K.EIK+14.0: chr5@7582 | 2.16E-10 | 0.00515  |
| 22Feb2011 | 24673 | 618.99  | -7.17689 | 3 K.EIK+14.0: chr5@7582 | 2.34E-11 | 5.34E-04 |
| 22Feb2011 | 22902 | 618.99  | -7.17689 | 3 K.EIK+14.0: chr5@7582 | 3.48E-11 | 7.16E-04 |
| 22Feb2011 | 24897 | 618.99  | -7.17689 | 3 K.EIK+14.0: chr5@7582 | 4.05E-11 | 0.00123  |
| 22Feb2011 | 14393 | 700.7   | -29.5415 | 3 R.K+14.016 chr5@1144  | 4.43E-10 | 0.008503 |
| 22Feb2011 | 16052 | 955.48  | -23.7023 | 3 K.IYPKCILII chr4@1215 | 1.95E-10 | 0.002602 |
| 22Feb2011 | 22883 | 924.51  | -2.54472 | 2 _SIMSRLEI Splice@chr  | 1.65E-10 | 0.004523 |
| 22Feb2011 | 9630  | 541.83  | -26.3737 | 2 R.FLGLHLVI chr5@1319  | 1.52E-10 | 0.00428  |
| 22Feb2011 | 23472 | 574.83  | -3.82916 | 2 N.SAEFILID Splice@chr | 5.29E-10 | 0.008753 |
| 22Feb2011 | 23301 | 574.83  | -3.82916 | 2 N.SAEFILID Splice@chr | 4.38E-10 | 0.009171 |
| 22Feb2011 | 23052 | 574.83  | -3.82916 | 2 N.SAEFILID Splice@chr | 2.70E-10 | 0.007745 |
| 22Feb2011 | 22659 | 574.83  | -3.82916 | 2 N.SAEFILID Splice@chr | 3.89E-10 | 0.008809 |
| 22Feb2011 | 22305 | 574.83  | -3.82916 | 2 N.SAEFILID Splice@chr | 4.25E-10 | 0.00806  |
| 22Feb2011 | 22263 | 574.83  | -3.82916 | 2 N.SAEFILID Splice@chr | 4.72E-10 | 0.008521 |
| 22Feb2011 | 23329 | 574.83  | -3.82916 | 2 N.SAEFILID Splice@chr | 3.52E-10 | 0.007123 |
| 22Feb2011 | 23677 | 574.83  | -3.82916 | 2 N.SAEFILID Splice@chr | 5.16E-10 | 0.009259 |
| 22Feb2011 | 23724 | 574.83  | -3.82916 | 2 N.SAEFILID Splice@chr | 5.48E-10 | 0.009588 |
| 22Feb2011 | 23777 | 574.83  | -3.82916 | 2 N.SAEFILID Splice@chr | 3.82E-10 | 0.007761 |
| 22Feb2011 | 23503 | 574.83  | -3.82916 | 2 N.SAEFILID Splice@chr | 4.11E-10 | 0.00954  |
| 22Feb2011 | 1015  | 689.33  | 1.241415 | 1 R.NMAEPK chr4@1247    | 6.11E-10 | 0.009985 |
| 22Feb2011 | 1024  | 434.22  | -4.93112 | 2 K.FFDVPSR chr3@2345   | 6.01E-10 | 0.009922 |
| 22Feb2011 | 17190 | 701.9   | -5.13782 | 2 Q.LK+14.01 chrX@2729  | 1.79E-10 | 0.003975 |
| 22Feb2011 | 21215 | 763.14  | -13.4323 | 3 Q.ILKTIVLA chr5@1385  | 1.22E-10 | 0.003801 |
| 22Feb2011 | 3759  | 729.39  | -20.1943 | 1 K.FHGGALK chr3@1907   | 3.97E-10 | 0.00825  |
| 22Feb2011 | 18841 | 546.63  | -11.7082 | 3 _EVGILLAN Splice@chr  | 7.39E-11 | 0.001747 |
| 22Feb2011 | 18647 | 546.63  | -11.7082 | 3 _EVGILLAN Splice@chr  | 8.14E-11 | 0.002889 |
| 22Feb2011 | 9291  | 870.57  | 10.89471 | 1 _TPLAKLAI Splice@chr  | 3.03E-10 | 0.006443 |

|           |       |         |          |                          |          |          |
|-----------|-------|---------|----------|--------------------------|----------|----------|
| 22Feb2011 | 26333 | 1082.57 | 16.80419 | 3 _..CPAGPQC Splice@chr  | 1.12E-11 | 2.04E-04 |
| 22Feb2011 | 25954 | 827.4   | -25.9233 | 2 R.TFFFNSA' chr1@5815   | 3.94E-10 | 0.009285 |
| 22Feb2011 | 17786 | 681.87  | 16.37392 | 2 K.K+14.016 chr4@8494   | 6.10E-11 | 8.50E-04 |
| 22Feb2011 | 1926  | 458.27  | 6.546895 | 3 R.EK+14.01 Splice@chr  | 3.58E-10 | 0.007998 |
| 22Feb2011 | 1964  | 458.27  | 6.546895 | 3 R.EK+14.01 Splice@chr  | 3.85E-10 | 0.008661 |
| 22Feb2011 | 10104 | 652.36  | 7.032657 | 3 K.IELVISTII Splice@chr | 3.32E-10 | 0.006351 |
| 22Feb2011 | 3339  | 460.23  | 7.886047 | 3 K.NEMEKD' chr2@7967    | 3.52E-10 | 0.006781 |
| 22Feb2011 | 19233 | 1068.55 | -28.2702 | 3 A.AGRLYVT Splice@chr   | 2.79E-12 | 3.48E-04 |
| 22Feb2011 | 20621 | 1068.55 | -28.2702 | 3 A.AGRLYVT Splice@chr   | 3.19E-11 | 0.001279 |
| 22Feb2011 | 20678 | 1068.55 | -28.2702 | 3 A.AGRLYVT Splice@chr   | 1.69E-10 | 0.003899 |
| 22Feb2011 | 20278 | 1068.56 | -18.891  | 3 A.AGRLYVT Splice@chr   | 4.07E-12 | 1.20E-04 |
| 22Feb2011 | 20333 | 1068.55 | -28.2702 | 3 A.AGRLYVT Splice@chr   | 2.09E-12 | 0        |
| 22Feb2011 | 20443 | 1068.55 | -28.2702 | 3 A.AGRLYVT Splice@chr   | 1.31E-10 | 0.003361 |
| 22Feb2011 | 19288 | 1068.55 | -28.2702 | 3 A.AGRLYVT Splice@chr   | 5.67E-13 | 0        |
| 22Feb2011 | 20637 | 1068.55 | -28.2702 | 3 A.AGRLYVT Splice@chr   | 2.29E-11 | 6.90E-04 |
| 22Feb2011 | 20588 | 1068.55 | -28.2702 | 3 A.AGRLYVT Splice@chr   | 2.57E-11 | 6.90E-04 |
| 22Feb2011 | 20541 | 1068.55 | -28.2702 | 3 A.AGRLYVT Splice@chr   | 1.74E-10 | 0.003729 |
| 22Feb2011 | 20599 | 1068.56 | -18.891  | 3 A.AGRLYVT Splice@chr   | 5.16E-10 | 0.009721 |
| 22Feb2011 | 20543 | 1068.55 | -28.2702 | 3 A.AGRLYVT Splice@chr   | 5.38E-11 | 0.002518 |
| 22Feb2011 | 20295 | 1068.56 | -18.891  | 3 A.AGRLYVT Splice@chr   | 1.24E-10 | 0.002554 |
| 22Feb2011 | 20933 | 1068.55 | -28.2702 | 3 A.AGRLYVT Splice@chr   | 2.19E-11 | 0.001063 |
| 22Feb2011 | 19843 | 1068.55 | -28.2702 | 3 A.AGRLYVT Splice@chr   | 1.53E-10 | 0.003634 |
| 22Feb2011 | 19811 | 1068.56 | -18.891  | 3 A.AGRLYVT Splice@chr   | 9.42E-11 | 0.003024 |
| 22Feb2011 | 20958 | 1068.55 | -28.2702 | 3 A.AGRLYVT Splice@chr   | 5.45E-11 | 0.001419 |
| 22Feb2011 | 21016 | 1068.55 | -28.2702 | 3 A.AGRLYVT Splice@chr   | 3.77E-12 | 4.51E-04 |
| 22Feb2011 | 21042 | 1068.56 | -18.891  | 3 A.AGRLYVT Splice@chr   | 1.30E-12 | 0        |
| 22Feb2011 | 20989 | 1068.56 | -18.891  | 3 A.AGRLYVT Splice@chr   | 4.45E-11 | 0.001476 |
| 22Feb2011 | 19703 | 1068.55 | -28.2702 | 3 A.AGRLYVT Splice@chr   | 2.43E-12 | 1.14E-04 |
| 22Feb2011 | 20919 | 1068.55 | -28.2702 | 3 A.AGRLYVT Splice@chr   | 1.23E-12 | 0        |
| 22Feb2011 | 21032 | 1068.56 | -18.891  | 3 A.AGRLYVT Splice@chr   | 1.66E-13 | 0        |
| 22Feb2011 | 20984 | 1068.56 | -18.891  | 3 A.AGRLYVT Splice@chr   | 1.70E-11 | 5.55E-04 |
| 22Feb2011 | 19339 | 1068.55 | -28.2702 | 3 A.AGRLYVT Splice@chr   | 1.72E-11 | 2.14E-04 |
| 22Feb2011 | 19282 | 1068.55 | -28.2702 | 3 A.AGRLYVT Splice@chr   | 3.80E-12 | 0        |
| 22Feb2011 | 20653 | 1068.55 | -28.2702 | 3 A.AGRLYVT Splice@chr   | 1.33E-13 | 0        |
| 22Feb2011 | 19182 | 1068.55 | -28.2702 | 3 A.AGRLYVT Splice@chr   | 2.66E-13 | 0        |
| 22Feb2011 | 20644 | 1068.55 | -28.2702 | 3 A.AGRLYVT Splice@chr   | 6.94E-11 | 0.002191 |
| 22Feb2011 | 20588 | 1068.55 | -28.2702 | 3 A.AGRLYVT Splice@chr   | 6.15E-12 | 0        |
| 22Feb2011 | 20204 | 1068.55 | -28.2702 | 3 A.AGRLYVT Splice@chr   | 8.32E-13 | 0        |
| 22Feb2011 | 20260 | 1068.56 | -18.891  | 3 A.AGRLYVT Splice@chr   | 1.38E-12 | 0        |
| 22Feb2011 | 20946 | 1068.55 | -28.2702 | 3 A.AGRLYVT Splice@chr   | 8.59E-14 | 0        |
| 22Feb2011 | 20285 | 1068.55 | -28.2702 | 3 A.AGRLYVT Splice@chr   | 8.07E-13 | 1.24E-04 |
| 22Feb2011 | 20265 | 1068.56 | -18.891  | 3 A.AGRLYVT Splice@chr   | 4.34E-12 | 0        |
| 22Feb2011 | 20315 | 1068.55 | -28.2702 | 3 A.AGRLYVT Splice@chr   | 5.03E-12 | 0        |
| 22Feb2011 | 20661 | 1068.55 | -28.2702 | 3 A.AGRLYVT Splice@chr   | 5.37E-13 | 1.29E-04 |
| 22Feb2011 | 20723 | 1068.55 | -28.2702 | 3 A.AGRLYVT Splice@chr   | 6.65E-13 | 1.29E-04 |
| 22Feb2011 | 21150 | 1068.55 | -28.2702 | 3 A.AGRLYVT Splice@chr   | 7.04E-12 | 2.02E-04 |
| 22Feb2011 | 21389 | 1068.55 | -28.2702 | 3 A.AGRLYVT Splice@chr   | 2.71E-13 | 0        |

|           |       |         |          |                         |          |          |
|-----------|-------|---------|----------|-------------------------|----------|----------|
| 22Feb2011 | 21679 | 791.4   | 10.82757 | 1 R.GMPDSK Splice@chr   | 3.49E-10 | 0.007491 |
| 22Feb2011 | 3081  | 616.33  | -2.82753 | 2 K.FFSILQNS chr4@336   | 2.11E-10 | 0.003539 |
| 22Feb2011 | 8167  | 496.87  | 8.497514 | 5 _VKKFFQT chr4@123     | 1.62E-11 | 8.51E-04 |
| 22Feb2011 | 12612 | 772.43  | 8.670777 | 2 F.DK+14.01 chr4@143   | 4.55E-10 | 0.008954 |
| 22Feb2011 | 5518  | 416.23  | -19.9908 | 2 R.ISLANASF Splice@chr | 2.43E-10 | 0.005169 |
| 22Feb2011 | 6124  | 416.23  | -19.9908 | 2 R.ISLANASF Splice@chr | 2.96E-10 | 0.006552 |
| 22Feb2011 | 23443 | 825.44  | -9.45442 | 3 K.VSISRPPK chr4@128   | 3.42E-10 | 0.007463 |
| 22Feb2011 | 5203  | 516.25  | -11.1804 | 3 R.DNQSK+1 chr5@155    | 2.48E-10 | 0.005934 |
| 22Feb2011 | 1936  | 533.76  | 9.852752 | 2 R.ELESSAT chr4@444    | 1.96E-10 | 0.003911 |
| 24Mar2011 | 1544  | 463.78  | 10.61728 | 2 K.KINHSSLK chr2@342   | 6.36E-10 | 0.008528 |
| 22Feb2011 | 15406 | 707.72  | 9.672967 | 3 K.GTRRSAN chr3@501    | 1.56E-10 | 0.003574 |
| 22Feb2011 | 73    | 435.24  | 19.25693 | 2 K.KTLGYCK Splice@chr  | 4.08E-10 | 0.009835 |
| 22Feb2011 | 8489  | 709.35  | -21.1964 | 2 R.RSETEAC chr1@135    | 2.57E-10 | 0.005773 |
| 22Feb2011 | 7944  | 709.86  | -9.43349 | 2 R.RSETEAC chr1@135    | 5.79E-11 | 0.00192  |
| 22Feb2011 | 8754  | 709.86  | -9.43349 | 2 R.RSETEAC chr1@135    | 2.65E-10 | 0.005457 |
| 22Feb2011 | 9014  | 709.86  | -9.43349 | 2 R.RSETEAC chr1@135    | 2.24E-10 | 0.007088 |
| 22Feb2011 | 8757  | 709.86  | -9.43349 | 2 R.RSETEAC chr1@135    | 2.46E-10 | 0.00524  |
| 22Feb2011 | 8364  | 709.35  | -21.1964 | 2 R.RSETEAC chr1@135    | 3.04E-10 | 0.006159 |
| 22Feb2011 | 8272  | 709.35  | -21.1964 | 2 R.RSETEAC chr1@135    | 1.16E-10 | 0.004021 |
| 22Feb2011 | 8997  | 709.86  | -9.43349 | 2 R.RSETEAC chr1@135    | 4.64E-10 | 0.008538 |
| 22Feb2011 | 8005  | 709.36  | -7.06548 | 2 R.RSETEAC chr1@135    | 1.93E-10 | 0.003684 |
| 22Feb2011 | 9266  | 709.86  | -9.43349 | 2 R.RSETEAC chr1@135    | 2.08E-10 | 0.004538 |
| 22Feb2011 | 8840  | 709.85  | -23.5644 | 2 R.RSETEAC chr1@135    | 7.11E-11 | 0.001392 |
| 22Feb2011 | 8628  | 709.36  | -7.06548 | 2 R.RSETEAC chr1@135    | 1.18E-10 | 0.002594 |
| 22Feb2011 | 8506  | 709.36  | -7.06548 | 2 R.RSETEAC chr1@135    | 3.45E-10 | 0.007931 |
| 22Feb2011 | 8743  | 709.86  | -9.43349 | 2 R.RSETEAC chr1@135    | 4.30E-10 | 0.00836  |
| 22Feb2011 | 9242  | 709.35  | -21.1964 | 2 R.RSETEAC chr1@135    | 1.42E-10 | 0.003605 |
| 22Feb2011 | 9508  | 709.86  | -9.43349 | 2 R.RSETEAC chr1@135    | 3.41E-10 | 0.00779  |
| 22Feb2011 | 9570  | 709.86  | -9.43349 | 2 R.RSETEAC chr1@135    | 1.83E-10 | 0.00445  |
| 22Feb2011 | 22358 | 1010.24 | 5.684854 | 4 R.MMHTIP Splice@chr   | 4.03E-10 | 0.008674 |
| 22Feb2011 | 19871 | 529.64  | -5.65967 | 3 K.MTNKTTI chr4@678    | 4.93E-10 | 0.008615 |
| 22Feb2011 | 3298  | 566.29  | -10.5347 | 2 K.KINSGTS\ chr4@127   | 3.30E-10 | 0.009499 |
| 22Feb2011 | 2686  | 566.29  | -10.5347 | 2 K.KINSGTS\ chr4@127   | 1.97E-10 | 0.004711 |
| 22Feb2011 | 2628  | 566.3   | 7.1884   | 2 K.KINSGTS\ chr4@127   | 3.61E-11 | 9.24E-04 |
| 22Feb2011 | 26791 | 960.15  | -0.14779 | 3 R.FSVLNGS Splice@chr  | 3.75E-11 | 0.001043 |
| 22Feb2011 | 26847 | 960.15  | -0.14779 | 3 R.FSVLNGS Splice@chr  | 5.55E-10 | 0.009255 |
| 22Feb2011 | 24828 | 759.42  | 8.477041 | 3 K.YDRVPVS chrX@139    | 4.60E-10 | 0.008933 |
| 22Feb2011 | 25381 | 759.75  | 2.603073 | 3 K.YDRVPVS chrX@139    | 5.69E-11 | 8.60E-04 |
| 22Feb2011 | 24859 | 759.42  | 8.477041 | 3 K.YDRVPVS chrX@139    | 8.84E-11 | 0.002277 |
| 22Feb2011 | 14005 | 808.4   | 3.12462  | 3 R.TTNEKAS chr4@140    | 4.76E-10 | 0.008877 |
| 22Feb2011 | 6856  | 507.02  | -21.892  | 4 K.HFPARSIC Splice@chr | 6.79E-10 | 0.009892 |
| 22Feb2011 | 7542  | 507.02  | -21.892  | 4 K.HFPARSIC Splice@chr | 2.27E-10 | 0.00407  |
| 22Feb2011 | 8192  | 507.02  | -21.892  | 4 K.HFPARSIC Splice@chr | 2.45E-10 | 0.004691 |
| 22Feb2011 | 7684  | 507.02  | -21.892  | 4 K.HFPARSIC Splice@chr | 3.68E-10 | 0.007364 |
| 22Feb2011 | 11511 | 523.29  | 13.90682 | 2 R.LLECQAR chrX@176    | 1.67E-10 | 0.003098 |
| 22Feb2011 | 10437 | 494.8   | 13.28771 | 2 R.LSSVNSLI chr4@114   | 2.31E-10 | 0.006043 |
| 22Feb2011 | 334   | 487.28  | -4.35122 | 3 K.NEM+15. chr3@870    | 4.03E-10 | 0.008644 |

|           |       |         |          |                         |          |          |
|-----------|-------|---------|----------|-------------------------|----------|----------|
| 22Feb2011 | 462   | 487.28  | -4.35122 | 3 K.NEM+15. chr3@870    | 3.29E-10 | 0.007432 |
| 22Feb2011 | 19355 | 778.38  | -0.94218 | 3 K.DTNGDLI chrX@766    | 6.26E-11 | 0.002921 |
| 22Feb2011 | 13751 | 444.24  | -19.4848 | 4 R.ENQNKII chr1@145    | 1.70E-10 | 0.003646 |
| 22Feb2011 | 5709  | 563.01  | -10.7516 | 4 R.WNDEDS chrX@153     | 2.74E-10 | 0.005091 |
| 22Feb2011 | 5645  | 615.33  | -9.83592 | 2 K.FPQKKNE chr5@374    | 4.74E-10 | 0.009759 |
| 22Feb2011 | 6213  | 615.33  | -9.83592 | 2 K.FPQKKNE chr5@374    | 2.96E-11 | 0.001734 |
| 22Feb2011 | 6000  | 615.33  | -9.83592 | 2 K.FPQKKNE chr5@374    | 4.09E-10 | 0.008981 |
| 22Feb2011 | 6327  | 615.33  | -9.83592 | 2 K.FPQKKNE chr5@374    | 8.05E-11 | 0.002201 |
| 22Feb2011 | 6274  | 615.33  | -9.83592 | 2 K.FPQKKNE chr5@374    | 1.82E-10 | 0.004775 |
| 22Feb2011 | 6080  | 615.33  | -9.83592 | 2 K.FPQKKNE chr5@374    | 1.10E-11 | 4.42E-04 |
| 22Feb2011 | 6129  | 615.33  | -9.83592 | 2 K.FPQKKNE chr5@374    | 1.85E-10 | 0.004224 |
| 22Feb2011 | 5470  | 615.33  | -9.83592 | 2 K.FPQKKNE chr5@374    | 4.10E-10 | 0.008666 |
| 22Feb2011 | 5453  | 615.33  | -9.83592 | 2 K.FPQKKNE chr5@374    | 8.31E-11 | 0.00262  |
| 22Feb2011 | 5400  | 615.33  | -9.83592 | 2 K.FPQKKNE chr5@374    | 3.62E-11 | 0.001331 |
| 22Feb2011 | 5508  | 615.33  | -9.83592 | 2 K.FPQKKNE chr5@374    | 1.49E-10 | 0.004611 |
| 22Feb2011 | 5449  | 615.33  | -9.83592 | 2 K.FPQKKNE chr5@374    | 6.26E-11 | 0.002605 |
| 22Feb2011 | 6105  | 615.33  | -9.83592 | 2 K.FPQKKNE chr5@374    | 1.95E-10 | 0.004489 |
| 22Feb2011 | 6200  | 615.33  | -9.83592 | 2 K.FPQKKNE chr5@374    | 4.39E-10 | 0.008401 |
| 22Feb2011 | 6251  | 615.33  | -9.83592 | 2 K.FPQKKNE chr5@374    | 1.42E-10 | 0.002801 |
| 22Feb2011 | 5259  | 615.33  | -9.83592 | 2 K.FPQKKNE chr5@374    | 3.73E-10 | 0.007383 |
| 22Feb2011 | 6074  | 615.33  | -9.83592 | 2 K.FPQKKNE chr5@374    | 2.88E-10 | 0.006245 |
| 22Feb2011 | 6034  | 615.33  | -9.83592 | 2 K.FPQKKNE chr5@374    | 3.66E-10 | 0.006871 |
| 22Feb2011 | 5922  | 615.33  | -9.83592 | 2 K.FPQKKNE chr5@374    | 6.65E-11 | 0.002191 |
| 22Feb2011 | 5855  | 615.33  | -9.83592 | 2 K.FPQKKNE chr5@374    | 7.26E-11 | 0.002364 |
| 22Feb2011 | 5733  | 615.33  | -9.83592 | 2 K.FPQKKNE chr5@374    | 2.43E-10 | 0.005912 |
| 22Feb2011 | 5680  | 615.33  | -9.83592 | 2 K.FPQKKNE chr5@374    | 1.62E-10 | 0.003933 |
| 22Feb2011 | 5800  | 615.33  | -9.83592 | 2 K.FPQKKNE chr5@374    | 4.57E-10 | 0.009772 |
| 22Feb2011 | 6587  | 615.33  | -9.83592 | 2 K.FPQKKNE chr5@374    | 1.74E-10 | 0.004385 |
| 22Feb2011 | 1916  | 625.32  | -5.96356 | 2 K.KMMELE Splice@chr   | 2.30E-10 | 0.004869 |
| 22Feb2011 | 4917  | 424.21  | -22.6904 | 3 K.LYDTGNN Splice@chr  | 4.40E-10 | 0.008629 |
| 22Feb2011 | 20516 | 776.95  | 27.92487 | 4 K.K+14.016 chr1@288   | 3.10E-10 | 0.004514 |
| 22Feb2011 | 18740 | 761.38  | 11.04596 | 2 K.NHYHQM Splice@chr   | 4.42E-10 | 0.009517 |
| 22Feb2011 | 26665 | 1092.06 | -22.1524 | 2 R.MLELFVN chr5@176    | 6.99E-11 | 0.001124 |
| 22Feb2011 | 10786 | 934.46  | -5.03473 | 4 S.HLPPQVII Splice@chr | 3.60E-10 | 0.007895 |
| 22Feb2011 | 11336 | 934.46  | -5.03473 | 4 S.HLPPQVII Splice@chr | 1.97E-10 | 0.005373 |
| 22Feb2011 | 26729 | 794.93  | 22.42596 | 2 K.QK+14.0 chr2@638    | 2.02E-10 | 0.003968 |
| 22Feb2011 | 25168 | 1078.58 | -11.1016 | 2 _K+14.016 chr2@138    | 1.03E-11 | 1.15E-04 |
| 22Feb2011 | 23130 | 1043.93 | -23.9424 | 3 K.TK+14.01 chr1@365   | 3.61E-10 | 0.007098 |
| 22Feb2011 | 24131 | 1043.94 | -14.4198 | 3 K.TK+14.01 chr1@365   | 5.47E-10 | 0.009588 |
| 22Feb2011 | 5137  | 409.24  | -7.55024 | 2 _VSLGSLG Splice@chr   | 5.25E-10 | 0.007538 |
| 22Feb2011 | 3592  | 488.29  | 23.7633  | 2 K.IIMNTLNI Splice@chr | 5.35E-10 | 0.009556 |
| 22Feb2011 | 24911 | 847.77  | -9.68572 | 3 N.CK+14.0 chr4@930    | 2.85E-10 | 0.006205 |
| 22Feb2011 | 24727 | 847.78  | 2.140061 | 3 N.CK+14.0 chr4@930    | 5.11E-10 | 0.008974 |
| 22Feb2011 | 25058 | 847.78  | 2.140061 | 3 N.CK+14.0 chr4@930    | 4.44E-10 | 0.008676 |
| 22Feb2011 | 28821 | 949.85  | -18.7828 | 4 K.RKKNEKK chr2@134    | 2.38E-10 | 0.005473 |
| 22Feb2011 | 20705 | 779.72  | 7.55479  | 3 R.FCDATFLI chr5@155   | 2.29E-10 | 0.003729 |
| 22Feb2011 | 21272 | 779.72  | 7.55479  | 3 R.FCDATFLI chr5@155   | 3.18E-10 | 0.00834  |

|           |       |         |          |                         |          |          |
|-----------|-------|---------|----------|-------------------------|----------|----------|
| 22Feb2011 | 21218 | 779.72  | 7.55479  | 3 R.FCDATFL chr5@1559   | 4.17E-11 | 6.28E-04 |
| 22Feb2011 | 22366 | 779.72  | 7.55479  | 3 R.FCDATFL chr5@1559   | 5.52E-12 | 4.18E-04 |
| 22Feb2011 | 23198 | 654.34  | -10.4362 | 3 K.ETMLLEH chr3@9118   | 4.39E-10 | 0.009768 |
| 22Feb2011 | 16027 | 644.01  | 7.087571 | 3 R.HQRELGI chr2@9571   | 1.42E-10 | 0.003266 |
| 22Feb2011 | 4762  | 573.34  | 13.22389 | 2 K.IQEIQQLP chr4@9948  | 2.18E-10 | 0.004606 |
| 22Feb2011 | 4444  | 573.34  | 13.22389 | 2 K.IQEIQQLP chr4@9948  | 4.54E-10 | 0.007955 |
| 22Feb2011 | 4965  | 573.34  | 13.22389 | 2 K.IQEIQQLP chr4@9948  | 8.38E-11 | 0.002366 |
| 22Feb2011 | 10735 | 447.25  | 4.103293 | 2 K.WLYAVNI chrX@1534   | 4.49E-10 | 0.008337 |
| 22Feb2011 | 26894 | 968.18  | -11.9481 | 3 K.SRFLSSKI chr3@1902  | 3.83E-10 | 0.007863 |
| 22Feb2011 | 12184 | 759.43  | 23.98257 | 2 H.ASWPSLC chr1@2750   | 8.66E-11 | 0.002213 |
| 22Feb2011 | 4594  | 417.23  | -4.76897 | 2 R.LSETGGLI chr5@9984  | 1.58E-10 | 0.003963 |
| 22Feb2011 | 14836 | 551.78  | -26.9279 | 4 K.TTTLSPIT chr2@3453  | 2.63E-10 | 0.004847 |
| 22Feb2011 | 24263 | 871.09  | -12.3266 | 3 S.LMSLM+1 chr2@1455   | 6.42E-11 | 0.001371 |
| 22Feb2011 | 25493 | 1133.9  | -15.8751 | 3 K.AKNVENI chr4@1741   | 2.94E-10 | 0.005662 |
| 22Feb2011 | 514   | 471.28  | 25.69846 | 2 _QLSPGGA Splice@chr   | 1.05E-11 | 2.64E-04 |
| 22Feb2011 | 16703 | 820.39  | -15.1211 | 4 _ERSSLNIN chrX@5451   | 3.04E-10 | 0.00656  |
| 22Feb2011 | 20939 | 881.11  | 16.27442 | 3 R.AWTKSSS chr1@1288   | 4.30E-10 | 0.007834 |
| 22Feb2011 | 8329  | 516.31  | 28.26976 | 3 K.TTVEAPF chrX@1564   | 1.40E-10 | 0.00369  |
| 22Feb2011 | 16121 | 744.7   | -17.5971 | 3 K.VFEICNKI chr5@1797  | 4.57E-11 | 0.001399 |
| 22Feb2011 | 4164  | 476.76  | -6.61171 | 2 R.KTIFGEEK chr4@1413  | 4.04E-10 | 0.00864  |
| 22Feb2011 | 23740 | 802.1   | -20.6217 | 3 K.TLVLDEAI chr3@7497  | 3.45E-10 | 0.007415 |
| 22Feb2011 | 26267 | 816.11  | 24.49741 | 3 R.FLNPSLET Splice@chr | 4.32E-10 | 0.009171 |
| 22Feb2011 | 707   | 510.26  | -7.79035 | 2 K.SFFLTYNK chrX@6973  | 2.68E-10 | 0.005418 |
| 22Feb2011 | 14644 | 653.83  | -10.9387 | 4 R.TQSGQV chr5@2070    | 1.53E-10 | 0.003649 |
| 22Feb2011 | 5779  | 465.27  | -18.4708 | 2 _CLPALTIK chr1@6807   | 2.88E-10 | 0.005936 |
| 22Feb2011 | 5205  | 465.27  | -18.4708 | 2 _CLPALTIK chr1@6807   | 1.35E-10 | 0.002439 |
| 22Feb2011 | 4821  | 465.27  | -18.4708 | 2 _CLPALTIK chr1@6807   | 1.35E-10 | 0.002315 |
| 22Feb2011 | 4764  | 465.27  | -18.4708 | 2 _CLPALTIK chr1@6807   | 1.35E-10 | 0.002315 |
| 22Feb2011 | 5978  | 465.27  | -18.4708 | 2 _CLPALTIK chr1@6807   | 1.35E-10 | 0.002677 |
| 22Feb2011 | 5634  | 465.27  | -18.4708 | 2 _CLPALTIK chr1@6807   | 4.73E-10 | 0.009759 |
| 22Feb2011 | 4993  | 465.27  | -18.4708 | 2 _CLPALTIK chr1@6807   | 2.88E-10 | 0.006684 |
| 22Feb2011 | 5648  | 465.27  | -18.4708 | 2 _CLPALTIK chr1@6807   | 3.02E-10 | 0.006286 |
| 22Feb2011 | 5592  | 465.27  | -18.4708 | 2 _CLPALTIK chr1@6807   | 3.90E-10 | 0.007697 |
| 22Feb2011 | 10234 | 582.31  | 7.979858 | 2 K.DVKRGGI chr1@5572   | 5.11E-10 | 0.007385 |
| 22Feb2011 | 23269 | 1078.55 | -12.8989 | 3 R.RWAETK chr2@3991    | 4.38E-10 | 0.007906 |
| 22Feb2011 | 24706 | 788.93  | 8.256542 | 2 R.ICEWGTG chr5@1746   | 6.14E-10 | 0.008883 |
| 22Feb2011 | 23656 | 680.38  | -27.8498 | 3 K.RREK+14 chr5@9175   | 2.11E-10 | 0.005198 |
| 22Feb2011 | 25621 | 680.38  | -27.8498 | 3 K.RREK+14 chr5@9175   | 3.16E-10 | 0.007744 |
| 22Feb2011 | 15641 | 1045.51 | -27.1043 | 4 R.TVRK+14 Splice@chr  | 2.28E-13 | 0        |
| 22Feb2011 | 15780 | 1045.51 | -27.1043 | 4 R.TVRK+14 Splice@chr  | 2.36E-14 | 0        |
| 22Feb2011 | 15737 | 1045.51 | -27.1043 | 4 R.TVRK+14 Splice@chr  | 7.81E-17 | 0        |
| 22Feb2011 | 14163 | 1045.51 | -27.1043 | 4 R.TVRK+14 Splice@chr  | 1.62E-16 | 0        |
| 22Feb2011 | 16001 | 1045.51 | -27.1043 | 4 R.TVRK+14 Splice@chr  | 3.56E-16 | 0        |
| 22Feb2011 | 9627  | 532.32  | 18.49542 | 2 R.FLRASAR chr1@1154   | 3.28E-10 | 0.006556 |
| 22Feb2011 | 20385 | 761.88  | -24.1192 | 2 K.IYKLGTTI chrX@1566  | 3.19E-10 | 0.007295 |
| 22Feb2011 | 10753 | 518.95  | 8.327544 | 3 _IVHMGEG chrX@9495    | 1.56E-10 | 0.003963 |
| 22Feb2011 | 7894  | 408.23  | -14.6485 | 3 _RKFSIAAI chr3@1228   | 1.66E-10 | 0.004449 |

|           |       |         |          |                         |          |          |
|-----------|-------|---------|----------|-------------------------|----------|----------|
| 22Feb2011 | 7193  | 475.27  | 20.07682 | 3 K.TLNSFQC Splice@chr  | 2.12E-10 | 0.004381 |
| 22Feb2011 | 15794 | 785.37  | -23.9498 | 3 K.INLFCCLK chr5@1449  | 1.49E-10 | 0.003413 |
| 22Feb2011 | 15558 | 572.34  | -11.1101 | 2 _KNNVKLV chr5@1080    | 2.13E-10 | 0.003539 |
| 22Feb2011 | 17315 | 754.09  | -23.9721 | 3 T.YGK+14.C chr1@1229  | 5.98E-10 | 0.009922 |
| 22Feb2011 | 18329 | 754.09  | -23.9721 | 3 T.YGK+14.C chr1@1229  | 1.55E-10 | 0.004104 |
| 22Feb2011 | 21802 | 896.81  | 17.83634 | 3 _LMIELPFt chr5@1558   | 1.94E-10 | 0.003729 |
| 22Feb2011 | 26595 | 987.18  | -2.78531 | 3 R.KYHMKQ chr4@1061    | 1.78E-10 | 0.003721 |
| 22Feb2011 | 6704  | 450.25  | 26.79794 | 2 R.PHPPHSA chr5@5840   | 1.88E-10 | 0.00374  |
| 22Feb2011 | 6832  | 450.25  | 26.79794 | 2 R.PHPPHSA chr5@5840   | 2.78E-10 | 0.006644 |
| 22Feb2011 | 16630 | 644.84  | -20.9176 | 2 R.KMFTFM chr5@1596    | 6.12E-10 | 0.009985 |
| 22Feb2011 | 15948 | 644.84  | -20.9176 | 2 R.KMFTFM chr5@1596    | 4.06E-10 | 0.008896 |
| 22Feb2011 | 26296 | 816.44  | 26.34792 | 2 R.WWGSIII chr3@1009   | 4.33E-10 | 0.008503 |
| 22Feb2011 | 4429  | 429.73  | -5.90812 | 2 K.LESDPLGI chr4@1376  | 4.55E-10 | 0.006769 |
| 22Feb2011 | 4930  | 517.26  | -24.3167 | 2 R.GWSVGG chr3@1146    | 1.88E-10 | 0.006491 |
| 22Feb2011 | 4327  | 517.26  | -24.3167 | 2 R.GWSVGG chr3@1146    | 4.60E-13 | 0        |
| 22Feb2011 | 4329  | 517.26  | -24.3167 | 2 R.GWSVGG chr3@1146    | 5.05E-10 | 0.00983  |
| 22Feb2011 | 3151  | 462.23  | -28.0159 | 2 K.YLSGVGG chr1@4438   | 3.33E-10 | 0.008432 |
| 22Feb2011 | 3210  | 462.23  | -28.0159 | 2 K.YLSGVGG chr1@4438   | 2.14E-10 | 0.005072 |
| 22Feb2011 | 2939  | 462.23  | -28.0159 | 2 K.YLSGVGG chr1@4438   | 8.79E-11 | 0.001833 |
| 22Feb2011 | 2574  | 462.23  | -28.0159 | 2 K.YLSGVGG chr1@4438   | 3.26E-10 | 0.008424 |
| 22Feb2011 | 3410  | 462.23  | -28.0159 | 2 K.YLSGVGG chr1@4438   | 5.87E-11 | 0.001624 |
| 22Feb2011 | 24451 | 818.16  | -3.13708 | 4 K.NMRIATi chr3@1351   | 1.37E-11 | 4.13E-04 |
| 22Feb2011 | 19466 | 800.94  | -15.1073 | 2 _KVRTQLD chr5@1296    | 3.88E-10 | 0.009213 |
| 22Feb2011 | 20817 | 1038.02 | -7.50677 | 2 K.K+14.016 Splice@chr | 2.03E-10 | 0.005558 |
| 22Feb2011 | 3770  | 494.28  | -22.0244 | 2 K.NAGIFPA chr3@3020   | 1.33E-10 | 0.002825 |
| 22Feb2011 | 3380  | 494.28  | -22.0244 | 2 K.NAGIFPA chr3@3020   | 6.75E-11 | 0.002207 |
| 22Feb2011 | 6208  | 568.96  | 5.158361 | 3 _SEWLASC Splice@chr   | 1.57E-10 | 0.005594 |
| 22Feb2011 | 21369 | 851.94  | 15.61142 | 2 K.IFIYLSGH chr5@1529  | 1.69E-11 | 0.00131  |
| 22Feb2011 | 17895 | 893.44  | -4.71902 | 2 R.EYSLALSC chr2@7027  | 1.35E-10 | 0.003009 |
| 22Feb2011 | 5310  | 480.75  | 19.74313 | 2 _WVADAC Splice@chr    | 4.05E-10 | 0.008313 |
| 22Feb2011 | 16110 | 576.64  | -27.9712 | 3 F.NAEK+14 chr1@1384   | 5.11E-10 | 0.009351 |
| 22Feb2011 | 15651 | 576.31  | -20.2986 | 3 F.NAEK+14 chr1@1384   | 3.99E-10 | 0.009812 |
| 22Feb2011 | 4948  | 501.27  | 19.27737 | 2 _QNGNVQ Splice@chr    | 3.66E-11 | 0.001521 |
| 22Feb2011 | 24119 | 924.52  | 23.82449 | 3 R.YWRNLKI Splice@chr  | 3.67E-10 | 0.005396 |
| 22Feb2011 | 18242 | 900.49  | -19.7216 | 2 L.LMPIFV chr5@1734    | 1.39E-10 | 0.003605 |
| 22Feb2011 | 21930 | 847.42  | -28.112  | 4 K.CFKIVNQ chrX@7130   | 2.78E-10 | 0.005571 |
| 22Feb2011 | 19219 | 785.06  | -26.4513 | 3 K.QITEM+1 Splice@chr  | 1.76E-10 | 0.004007 |
| 22Feb2011 | 17345 | 923.48  | -11.891  | 3 K.HTM+15 chr4@2837    | 1.50E-10 | 0.003578 |
| 22Feb2011 | 3714  | 437.93  | -6.51898 | 3 K.FKKFPLKf chr1@1366  | 2.46E-10 | 0.006242 |
| 22Feb2011 | 24379 | 723.13  | -15.5353 | 4 _NFETPTPi chr3@1054   | 4.54E-12 | 2.26E-04 |
| 22Feb2011 | 24204 | 723.14  | -1.66912 | 4 _NFETPTPi chr3@1054   | 3.16E-10 | 0.00656  |
| 22Feb2011 | 6417  | 598.28  | -28.9925 | 2 R.RSSMECL chr1@2879   | 3.88E-10 | 0.007299 |
| 22Feb2011 | 16783 | 708.35  | 10.32036 | 2 K.QYFLEETi chr1@6449  | 3.49E-10 | 0.007828 |
| 22Feb2011 | 10508 | 638.32  | -18.7705 | 4 _FM+15.9i Splice@chr  | 3.96E-10 | 0.009219 |
| 22Feb2011 | 23233 | 818.41  | -10.4322 | 3 K.YLGNSEK chr2@9042   | 2.49E-10 | 0.006728 |
| 22Feb2011 | 17143 | 778.41  | -24.4702 | 2 R.LFPLNSA Splice@chr  | 2.69E-11 | 9.53E-04 |
| 22Feb2011 | 4132  | 534.3   | -3.77683 | 2 R.EKHVPSK chrX@6749   | 9.37E-11 | 0.002515 |

|           |       |         |          |                         |          |          |
|-----------|-------|---------|----------|-------------------------|----------|----------|
| 22Feb2011 | 26999 | 894.85  | -26.662  | 3 _..MAIKGIF Splice@chr | 1.24E-10 | 0.002832 |
| 22Feb2011 | 27539 | 439.25  | 0.835637 | 3 K.AASRASN Splice@chr  | 4.11E-10 | 0.006827 |
| 22Feb2011 | 27657 | 439.25  | 0.835637 | 3 K.AASRASN Splice@chr  | 2.06E-11 | 3.94E-04 |
| 22Feb2011 | 27597 | 439.25  | 0.835637 | 3 K.AASRASN Splice@chr  | 7.22E-12 | 1.10E-04 |
| 22Feb2011 | 27195 | 439.25  | 0.835637 | 3 K.AASRASN Splice@chr  | 8.45E-11 | 0.001384 |
| 22Feb2011 | 27672 | 439.25  | 0.835637 | 3 K.AASRASN Splice@chr  | 5.62E-10 | 0.009437 |
| 22Feb2011 | 1936  | 439.25  | 0.835637 | 3 K.AASRASN Splice@chr  | 1.08E-10 | 0.003282 |
| 22Feb2011 | 16247 | 698.34  | -22.523  | 3 K.GQK+14.1 Splice@chr | 1.31E-10 | 0.003256 |
| 22Feb2011 | 20200 | 1012.2  | 19.02063 | 3 R.IWRWQV Splice@chr   | 1.56E-10 | 0.003963 |
| 22Feb2011 | 20450 | 1012.2  | 19.02063 | 3 R.IWRWQV Splice@chr   | 3.81E-10 | 0.008104 |
| 22Feb2011 | 21008 | 1012.2  | 19.02063 | 3 R.IWRWQV Splice@chr   | 3.16E-10 | 0.00698  |
| 22Feb2011 | 1057  | 487.27  | 21.64794 | 3 _..NSIEKVIE chr3@6554 | 3.15E-10 | 0.006388 |
| 22Feb2011 | 341   | 487.27  | 21.64794 | 3 _..NSIEKVIE chr3@6554 | 5.02E-10 | 0.009246 |
| 22Feb2011 | 5217  | 461.25  | -7.16666 | 2 R.GLGGFG( chr2@8938   | 3.22E-10 | 0.004931 |
| 22Feb2011 | 5764  | 461.24  | -28.9391 | 2 R.GLGGFG( chr2@8938   | 1.14E-10 | 0.002539 |
| 22Feb2011 | 19891 | 563.84  | 22.23129 | 2 R.TPLDLAD chr4@9155   | 8.54E-11 | 0.002016 |
| 22Feb2011 | 19829 | 563.84  | 22.23129 | 2 R.TPLDLAD chr4@9155   | 2.47E-11 | 3.94E-04 |
| 22Feb2011 | 19881 | 563.84  | 22.23129 | 2 R.TPLDLAD chr4@9155   | 6.30E-11 | 0.001032 |
| 22Feb2011 | 18678 | 563.84  | 22.23129 | 2 R.TPLDLAD chr4@9155   | 9.86E-11 | 0.003196 |
| 22Feb2011 | 19313 | 563.84  | 22.23129 | 2 R.TPLDLAD chr4@9155   | 4.49E-10 | 0.009005 |
| 22Feb2011 | 19120 | 563.84  | 22.23129 | 2 R.TPLDLAD chr4@9155   | 7.78E-11 | 0.001215 |
| 22Feb2011 | 19881 | 563.84  | 22.23129 | 2 R.TPLDLAD chr4@9155   | 2.42E-10 | 0.004903 |
| 22Feb2011 | 19966 | 563.84  | 22.23129 | 2 R.TPLDLAD chr4@9155   | 9.33E-11 | 0.00261  |
| 22Feb2011 | 19923 | 563.84  | 22.23129 | 2 R.TPLDLAD chr4@9155   | 5.27E-11 | 0.001847 |
| 22Feb2011 | 19895 | 563.84  | 22.23129 | 2 R.TPLDLAD chr4@9155   | 1.11E-10 | 0.002963 |
| 22Feb2011 | 25883 | 1082.23 | 22.98351 | 3 K.SVKIRLPN Splice@chr | 1.36E-10 | 0.002775 |
| 22Feb2011 | 6361  | 618.87  | -8.59417 | 2 K.SLHLQLL( chr1@4308  | 2.39E-10 | 0.006703 |
| 22Feb2011 | 6474  | 510.27  | -7.25592 | 2 R.SFLLYGYF chrX@1559  | 2.43E-10 | 0.005544 |
| 22Feb2011 | 8895  | 583.29  | -21.8485 | 3 K.MSQNFV chr5@5942    | 1.05E-10 | 0.002421 |
| 22Feb2011 | 8911  | 583.29  | -21.8485 | 3 K.MSQNFV chr5@5942    | 4.30E-11 | 0.001203 |
| 22Feb2011 | 1804  | 524.76  | -14.5666 | 2 K.ESEASLEF chr5@1553  | 3.03E-10 | 0.006566 |
| 22Feb2011 | 1848  | 524.76  | -14.5666 | 2 K.ESEASLEF chr5@1553  | 1.17E-10 | 0.002675 |
| 22Feb2011 | 22353 | 735.82  | -22.5924 | 2 K.FAETNAK chr5@1229   | 6.13E-11 | 0.001419 |
| 22Feb2011 | 22414 | 735.83  | -8.97052 | 2 K.FAETNAK chr5@1229   | 8.19E-11 | 0.001746 |
| 22Feb2011 | 22890 | 735.82  | -22.5924 | 2 K.FAETNAK chr5@1229   | 6.03E-11 | 0.002249 |
| 22Feb2011 | 8311  | 446.59  | 0.182638 | 3 R.ISVTNTGI Splice@chr | 1.76E-10 | 0.004517 |
| 22Feb2011 | 26417 | 696.06  | -21.6603 | 3 R.RRILKNDI chr4@5221  | 3.37E-10 | 0.007084 |
| 22Feb2011 | 2662  | 430.73  | -17.2745 | 2 R.KSLDSGP chr2@1385   | 1.27E-10 | 0.002844 |
| 22Feb2011 | 19721 | 1171.49 | -28.9774 | 2 K.DLYANTV Splice@chr  | 1.15E-10 | 0.002537 |
| 22Feb2011 | 19363 | 1171.49 | -28.9774 | 2 K.DLYANTV Splice@chr  | 5.08E-11 | 0.002096 |
| 22Feb2011 | 18916 | 1171.49 | -28.9774 | 2 K.DLYANTV Splice@chr  | 1.15E-10 | 0.002634 |
| 22Feb2011 | 18888 | 1171.49 | -28.9774 | 2 K.DLYANTV Splice@chr  | 6.03E-11 | 0.002109 |
| 22Feb2011 | 18764 | 1171.49 | -28.9774 | 2 K.DLYANTV Splice@chr  | 5.92E-11 | 0.002502 |
| 22Feb2011 | 19004 | 1171.49 | -28.9774 | 2 K.DLYANTV Splice@chr  | 7.91E-12 | 3.28E-04 |
| 22Feb2011 | 20011 | 910.98  | -2.38124 | 2 R.KM+15.9 chr2@1489   | 1.60E-10 | 0.00273  |
| 22Feb2011 | 18022 | 474.67  | 13.02125 | 5 R.NQNKKEI chr1@1325   | 2.96E-10 | 0.006498 |
| 22Feb2011 | 12930 | 832.46  | 11.12943 | 2 _..NIHTFSVI chr5@6576 | 6.24E-10 | 0.008955 |

|           |       |         |          |                        |          |          |
|-----------|-------|---------|----------|------------------------|----------|----------|
| 22Feb2011 | 27012 | 816.44  | -26.5711 | 2 R.K+14.016 chr1@4347 | 2.65E-10 | 0.005237 |
| 22Feb2011 | 5935  | 552.3   | 10.18569 | 2 R.LDASDAS chr2@1388  | 2.51E-10 | 0.005952 |
| 22Feb2011 | 10824 | 567.32  | -12.6097 | 2 K.IKTCKARF chrX@1431 | 3.09E-10 | 0.006251 |
| 22Feb2011 | 18320 | 798.41  | -27.4376 | 3 K.IMLTMQ` chr5@4637  | 4.69E-10 | 0.008671 |
| 22Feb2011 | 16437 | 711.59  | -22.6614 | 4 _K+14.016 Splice@chr | 4.54E-10 | 0.009937 |
| 22Feb2011 | 17910 | 711.59  | -22.6614 | 4 _K+14.016 Splice@chr | 4.14E-10 | 0.008219 |
| 22Feb2011 | 16356 | 948.45  | -23.4347 | 3 _K+14.016 Splice@chr | 3.17E-10 | 0.006112 |
| 22Feb2011 | 16404 | 711.34  | -21.4807 | 4 _K+14.016 Splice@chr | 1.55E-11 | 2.86E-04 |
| 22Feb2011 | 17253 | 948.45  | -23.4347 | 3 _K+14.016 Splice@chr | 4.99E-11 | 0.001274 |
| 22Feb2011 | 17741 | 711.59  | -22.6614 | 4 _K+14.016 Splice@chr | 5.21E-10 | 0.008486 |
| 22Feb2011 | 17200 | 711.59  | -22.6614 | 4 _K+14.016 Splice@chr | 4.36E-10 | 0.008063 |
| 22Feb2011 | 16479 | 948.45  | -23.4347 | 3 _K+14.016 Splice@chr | 1.76E-10 | 0.004092 |
| 22Feb2011 | 16902 | 711.59  | -22.6614 | 4 _K+14.016 Splice@chr | 7.63E-11 | 0.001443 |
| 22Feb2011 | 17269 | 711.59  | -22.6614 | 4 _K+14.016 Splice@chr | 4.46E-10 | 0.009528 |
| 22Feb2011 | 16513 | 948.45  | -23.4347 | 3 _K+14.016 Splice@chr | 2.80E-10 | 0.006791 |
| 22Feb2011 | 16937 | 711.59  | -22.6614 | 4 _K+14.016 Splice@chr | 6.23E-12 | 5.33E-04 |
| 22Feb2011 | 17775 | 711.59  | -22.6614 | 4 _K+14.016 Splice@chr | 1.62E-10 | 0.004228 |
| 22Feb2011 | 17843 | 711.59  | -22.6614 | 4 _K+14.016 Splice@chr | 4.13E-10 | 0.00841  |
| 22Feb2011 | 19514 | 843.45  | 26.13584 | 2 _WAKLED( chr4@1001   | 1.33E-10 | 0.002824 |
| 22Feb2011 | 19446 | 843.45  | 26.13584 | 2 _WAKLED( chr4@1001   | 3.03E-10 | 0.006146 |
| 22Feb2011 | 25205 | 1042.88 | -20.9194 | 3 K.LYVLNNL chr4@1065  | 5.07E-10 | 0.009938 |
| 22Feb2011 | 25831 | 1042.89 | -11.3872 | 3 K.LYVLNNL chr4@1065  | 4.72E-10 | 0.008009 |
| 22Feb2011 | 26492 | 856.07  | 1.108311 | 2 G.FQLVLVV chr2@1105  | 1.66E-10 | 0.004624 |
| 22Feb2011 | 10500 | 662.88  | -22.7463 | 2 K.SILLNSFV chr2@1831 | 8.52E-11 | 0.001465 |
| 22Feb2011 | 28256 | 996.8   | 3.18725  | 3 Q.EM+15.9 Splice@chr | 8.18E-11 | 0.002004 |
| 22Feb2011 | 555   | 416.23  | -6.54119 | 2 R.AEKVAGE chr5@8920  | 3.59E-10 | 0.007563 |
| 22Feb2011 | 482   | 416.23  | -6.54119 | 2 R.AEKVAGE chr5@8920  | 6.19E-12 | 2.21E-04 |
| 22Feb2011 | 12399 | 1066.05 | -27.3756 | 2 K.SFKENK+ chr5@3237  | 1.74E-10 | 0.004377 |
| 22Feb2011 | 25591 | 615.07  | -1.46581 | 4 W.NNITIISI chr3@6945 | 2.50E-10 | 0.004691 |
| 22Feb2011 | 24073 | 615.07  | -1.46581 | 4 W.NNITIISI chr3@6945 | 6.54E-11 | 0.002543 |
| 22Feb2011 | 23828 | 615.07  | -1.46581 | 4 W.NNITIISI chr3@6945 | 1.70E-10 | 0.003989 |
| 22Feb2011 | 23515 | 867.45  | -3.66304 | 3 R.ICNK+14. chrX@3531 | 4.59E-10 | 0.009617 |
| 22Feb2011 | 16642 | 465.78  | -18.8445 | 2 R.LGMLTLL chr5@5865  | 6.75E-11 | 0.001161 |
| 22Feb2011 | 16594 | 465.78  | -18.8445 | 2 R.LGMLTLL chr5@5865  | 3.57E-11 | 6.09E-04 |
| 22Feb2011 | 17796 | 465.78  | -18.8445 | 2 R.LGMLTLL chr5@5865  | 1.06E-10 | 0.002426 |
| 22Feb2011 | 17851 | 465.78  | -18.8445 | 2 R.LGMLTLL chr5@5865  | 1.42E-10 | 0.00316  |
| 22Feb2011 | 17504 | 465.78  | -18.8445 | 2 R.LGMLTLL chr5@5865  | 4.40E-11 | 8.19E-04 |
| 22Feb2011 | 17560 | 465.78  | -18.8445 | 2 R.LGMLTLL chr5@5865  | 6.75E-11 | 0.001291 |
| 22Feb2011 | 17802 | 465.78  | -18.8445 | 2 R.LGMLTLL chr5@5865  | 8.13E-11 | 0.001384 |
| 22Feb2011 | 17748 | 465.78  | -18.8445 | 2 R.LGMLTLL chr5@5865  | 1.05E-10 | 0.001725 |
| 22Feb2011 | 18095 | 465.78  | -18.8445 | 2 R.LGMLTLL chr5@5865  | 8.88E-11 | 0.002213 |
| 22Feb2011 | 18154 | 465.78  | -18.8445 | 2 R.LGMLTLL chr5@5865  | 7.35E-11 | 0.002056 |
| 22Feb2011 | 17754 | 465.78  | -18.8445 | 2 R.LGMLTLL chr5@5865  | 2.41E-10 | 0.005616 |
| 22Feb2011 | 18258 | 465.78  | -18.8445 | 2 R.LGMLTLL chr5@5865  | 8.27E-11 | 0.002201 |
| 22Feb2011 | 17291 | 465.78  | -18.8445 | 2 R.LGMLTLL chr5@5865  | 5.83E-11 | 0.001982 |
| 22Feb2011 | 18159 | 465.78  | -18.8445 | 2 R.LGMLTLL chr5@5865  | 7.81E-11 | 0.001663 |
| 22Feb2011 | 18213 | 465.78  | -18.8445 | 2 R.LGMLTLL chr5@5865  | 4.90E-11 | 0.001356 |

|           |       |         |          |                         |          |          |
|-----------|-------|---------|----------|-------------------------|----------|----------|
| 22Feb2011 | 18079 | 465.78  | -18.8445 | 2 R.LGMLTLL chr5@5865   | 7.81E-11 | 0.00177  |
| 22Feb2011 | 18131 | 465.78  | -18.8445 | 2 R.LGMLTLL chr5@5865   | 7.04E-11 | 0.001687 |
| 22Feb2011 | 18241 | 465.78  | -18.8445 | 2 R.LGMLTLL chr5@5865   | 2.91E-11 | 9.50E-04 |
| 22Feb2011 | 18182 | 465.78  | -18.8445 | 2 R.LGMLTLL chr5@5865   | 1.03E-10 | 0.002341 |
| 22Feb2011 | 18127 | 465.78  | -18.8445 | 2 R.LGMLTLL chr5@5865   | 6.75E-11 | 0.001878 |
| 22Feb2011 | 17208 | 465.78  | -18.8445 | 2 R.LGMLTLL chr5@5865   | 8.86E-11 | 0.001457 |
| 22Feb2011 | 18197 | 465.78  | -18.8445 | 2 R.LGMLTLL chr5@5865   | 7.67E-11 | 0.00206  |
| 22Feb2011 | 18170 | 465.78  | -18.8445 | 2 R.LGMLTLL chr5@5865   | 2.91E-11 | 6.19E-04 |
| 22Feb2011 | 16624 | 465.78  | -18.8445 | 2 R.LGMLTLL chr5@5865   | 6.75E-11 | 0.001463 |
| 22Feb2011 | 16679 | 465.78  | -18.8445 | 2 R.LGMLTLL chr5@5865   | 1.03E-10 | 0.002835 |
| 22Feb2011 | 18030 | 465.78  | -18.8445 | 2 R.LGMLTLL chr5@5865   | 9.32E-11 | 0.001906 |
| 22Feb2011 | 16797 | 465.78  | -18.8445 | 2 R.LGMLTLL chr5@5865   | 9.36E-11 | 0.002521 |
| 22Feb2011 | 18085 | 465.78  | -18.8445 | 2 R.LGMLTLL chr5@5865   | 1.56E-10 | 0.004479 |
| 22Feb2011 | 18027 | 465.78  | -18.8445 | 2 R.LGMLTLL chr5@5865   | 2.91E-11 | 0.001016 |
| 22Feb2011 | 17355 | 465.78  | -18.8445 | 2 R.LGMLTLL chr5@5865   | 8.77E-11 | 0.00289  |
| 22Feb2011 | 17301 | 465.78  | -18.8445 | 2 R.LGMLTLL chr5@5865   | 5.83E-11 | 0.001728 |
| 22Feb2011 | 17509 | 465.78  | -18.8445 | 2 R.LGMLTLL chr5@5865   | 1.08E-10 | 0.003173 |
| 22Feb2011 | 17860 | 465.78  | -18.8445 | 2 R.LGMLTLL chr5@5865   | 1.42E-10 | 0.00282  |
| 22Feb2011 | 17805 | 465.78  | -18.8445 | 2 R.LGMLTLL chr5@5865   | 3.83E-11 | 7.02E-04 |
| 22Feb2011 | 17668 | 465.78  | -18.8445 | 2 R.LGMLTLL chr5@5865   | 6.75E-11 | 0.001848 |
| 22Feb2011 | 17492 | 465.78  | -18.8445 | 2 R.LGMLTLL chr5@5865   | 7.67E-11 | 0.001498 |
| 22Feb2011 | 17954 | 465.78  | -18.8445 | 2 R.LGMLTLL chr5@5865   | 7.96E-11 | 0.002409 |
| 22Feb2011 | 7040  | 568.82  | 3.00978  | 2 A.LVHNEN\ chr5@1630   | 3.99E-10 | 0.008237 |
| 22Feb2011 | 13039 | 594.8   | -4.52268 | 2 K.M+15.99 chr3@4822   | 1.26E-10 | 0.003463 |
| 22Feb2011 | 4848  | 492.58  | 0.082775 | 3 K.TNDDAID chr5@1638   | 4.84E-10 | 0.009808 |
| 22Feb2011 | 22254 | 799.4   | 9.000079 | 3 K.EVK+14.C Splice@chr | 3.21E-10 | 0.00646  |
| 22Feb2011 | 13787 | 592.32  | 21.40138 | 3 R.EILHFSM- chr3@2780  | 1.17E-10 | 0.004021 |
| 22Feb2011 | 8411  | 421.23  | 7.124426 | 3 _VESGGVA Splice@chr   | 2.93E-10 | 0.006338 |
| 22Feb2011 | 11774 | 670.35  | 26.93122 | 3 K.NNHFLYC chr4@4085   | 3.93E-10 | 0.007816 |
| 22Feb2011 | 17384 | 813.92  | -19.8964 | 2 K.NLLNFFPI chrX@1605  | 2.42E-10 | 0.004903 |
| 22Feb2011 | 19844 | 841.23  | 20.77596 | 4 _PFSEALD\ Splice@chr  | 3.37E-11 | 0.001655 |
| 22Feb2011 | 1661  | 460.72  | -29.0754 | 2 R.SFHTATT Splice@chr  | 1.32E-10 | 0.002775 |
| 22Feb2011 | 24133 | 1029.51 | -2.13637 | 4 K.FKDVLH Splice@chr   | 5.95E-10 | 0.009971 |
| 22Feb2011 | 22608 | 1083.23 | -4.58702 | 3 _PYEYK+14 chr5@1735   | 3.69E-10 | 0.007402 |
| 22Feb2011 | 16378 | 823.43  | 2.745922 | 2 A.LYEYLFNI Splice@chr | 3.46E-14 | 0        |
| 22Feb2011 | 5151  | 525.77  | 8.209824 | 2 R.SLGWCAI chrX@1635   | 1.93E-10 | 0.004269 |
| 22Feb2011 | 14499 | 502.79  | 19.21898 | 2 K.LLYQNPT chrX@4655   | 3.26E-10 | 0.006499 |
| 22Feb2011 | 14808 | 502.79  | 19.21898 | 2 K.LLYQNPT chrX@4655   | 1.51E-10 | 0.003649 |
| 22Feb2011 | 14488 | 502.79  | 19.21898 | 2 K.LLYQNPT chrX@4655   | 1.96E-10 | 0.004389 |
| 22Feb2011 | 5151  | 489.6   | -6.74566 | 3 R.ILLLGHW chr5@1541   | 4.51E-10 | 0.008852 |
| 22Feb2011 | 4692  | 489.6   | -6.74566 | 3 R.ILLLGHW chr5@1541   | 3.39E-10 | 0.00777  |
| 22Feb2011 | 20976 | 932.96  | -28.3478 | 4 R.NISENIK+ chr2@1005  | 2.68E-10 | 0.005968 |
| 22Feb2011 | 7933  | 539.76  | 2.213209 | 2 R.SEEVESI chrX@3640   | 3.51E-10 | 0.008016 |
| 22Feb2011 | 5357  | 412.75  | 25.60523 | 2 R.VSGFGTK chr5@1305   | 3.72E-10 | 0.007069 |
| 22Feb2011 | 5044  | 412.75  | 25.60523 | 2 R.VSGFGTK chr5@1305   | 2.92E-10 | 0.005503 |
| 22Feb2011 | 5697  | 412.75  | 25.60523 | 2 R.VSGFGTK chr5@1305   | 2.22E-10 | 0.005238 |
| 22Feb2011 | 21426 | 812.69  | 29.43101 | 4 _NFKLSFM chr3@5318    | 6.03E-10 | 0.008808 |

|           |       |         |          |                        |          |          |
|-----------|-------|---------|----------|------------------------|----------|----------|
| 22Feb2011 | 27516 | 785.92  | -3.11041 | 2 R.SPILLSTYI chr5@205 | 3.55E-10 | 0.007605 |
| 22Feb2011 | 5970  | 559.32  | -7.98386 | 3 K.TADFVVL Splice@chr | 2.97E-10 | 0.006126 |
| 22Feb2011 | 8433  | 560.66  | -14.2502 | 3 K.KLKITKQF chrX@173  | 1.28E-10 | 0.002607 |
| 22Feb2011 | 26500 | 764.41  | -21.4083 | 3 K.YK+14.01 chr5@199  | 3.38E-10 | 0.008276 |
| 22Feb2011 | 23530 | 1068.04 | -5.92203 | 2 K.EGDKVG/ Splice@chr | 1.53E-10 | 0.003418 |
| 22Feb2011 | 15016 | 628.81  | 7.77769  | 2 R.REESSFQ Splice@chr | 5.15E-10 | 0.009282 |
| 22Feb2011 | 16379 | 628.81  | 7.77769  | 2 R.REESSFQ Splice@chr | 3.37E-10 | 0.007251 |
| 22Feb2011 | 13827 | 858.47  | -21.9233 | 2 R.NATLTEA Splice@chr | 3.36E-10 | 0.005098 |
| 22Feb2011 | 14977 | 858.47  | -21.9233 | 2 R.NATLTEA chr2@144   | 9.17E-11 | 0.002262 |
| 22Feb2011 | 15319 | 858.47  | -21.9233 | 2 R.NATLTEA chr2@144   | 6.47E-11 | 0.001671 |
| 22Feb2011 | 15221 | 858.47  | -21.9233 | 2 R.NATLTEA chr2@144   | 1.27E-10 | 0.002595 |
| 22Feb2011 | 22745 | 794.26  | 26.55328 | 5 _K.FQTGTL chr5@133   | 2.69E-10 | 0.006106 |
| 22Feb2011 | 20119 | 956.52  | -28.6799 | 4 K.RGGGKRI chr5@445   | 4.15E-10 | 0.009308 |
| 22Feb2011 | 21611 | 956.52  | -28.6799 | 4 K.RGGGKRI chr5@445   | 5.02E-10 | 0.009819 |
| 22Feb2011 | 13549 | 1137.05 | -9.86206 | 2 K.STRVLRQ chr1@403   | 2.16E-10 | 0.004438 |
| 22Feb2011 | 3297  | 518.5   | -28.525  | 4 K.EMTTGK chr1@589    | 4.18E-10 | 0.007417 |
| 22Feb2011 | 6112  | 531.94  | -27.2602 | 3 K.VNKK+14 chr5@951   | 2.00E-10 | 0.005885 |
| 22Feb2011 | 23825 | 735.08  | -28.4351 | 4 R.DFCEKLA chr2@764   | 4.29E-10 | 0.007656 |
| 22Feb2011 | 2558  | 569.31  | 2.098027 | 2 R.VNQNTK chr4@700    | 7.54E-11 | 0.001571 |
| 22Feb2011 | 21181 | 788.93  | -18.8726 | 2 H.KIVSPTFI chr4@739  | 6.01E-11 | 0.001814 |
| 22Feb2011 | 21550 | 788.93  | -18.8726 | 2 H.KIVSPTFI chr4@739  | 2.98E-10 | 0.006705 |
| 22Feb2011 | 20670 | 777.41  | 14.15051 | 3 K.M+15.99 chr4@382   | 1.06E-10 | 0.001725 |
| 22Feb2011 | 15885 | 872.42  | -22.0236 | 3 _DVHPYRI chr1@143    | 6.42E-10 | 0.009339 |
| 22Feb2011 | 53    | 733.74  | -12.9715 | 3 R.EIIPSENV chrX@122  | 3.56E-10 | 0.005331 |
| 22Feb2011 | 179   | 759.86  | 18.55335 | 2 Q.DQHYCP Splice@chr  | 4.04E-10 | 0.006762 |
| 22Feb2011 | 2462  | 759.34  | -5.55351 | 2 Q.DQHYCP Splice@chr  | 1.09E-11 | 2.86E-04 |
| 22Feb2011 | 3725  | 759.34  | -5.55351 | 2 Q.DQHYCP Splice@chr  | 2.59E-11 | 5.34E-04 |
| 22Feb2011 | 2926  | 458.58  | -16.0064 | 3 K.LSEICAV Splice@chr | 1.24E-10 | 0.001768 |
| 22Feb2011 | 16156 | 690.86  | 25.57013 | 2 K.TMTYHQ chr4@600    | 2.71E-10 | 0.007731 |
| 22Feb2011 | 24213 | 996.87  | -23.3576 | 3 S.VPFSK+1 Splice@chr | 2.01E-10 | 0.004397 |
| 22Feb2011 | 18480 | 624.33  | 2.545903 | 3 R.MNVLAD Splice@chr  | 6.66E-11 | 0.001161 |
| 22Feb2011 | 20532 | 624.67  | 11.45771 | 3 R.MNVLAD Splice@chr  | 1.58E-10 | 0.002094 |
| 22Feb2011 | 19850 | 624.34  | 18.60468 | 3 R.MNVLAD Splice@chr  | 9.35E-11 | 0.002262 |
| 22Feb2011 | 19591 | 624.66  | -4.60106 | 3 R.MNVLAD Splice@chr  | 2.45E-11 | 3.94E-04 |
| 22Feb2011 | 19565 | 624.34  | 18.60468 | 3 R.MNVLAD Splice@chr  | 6.35E-11 | 0.00244  |
| 22Feb2011 | 19621 | 624.33  | 2.545903 | 3 R.MNVLAD Splice@chr  | 1.34E-10 | 0.003451 |
| 22Feb2011 | 19721 | 624.33  | 2.545903 | 3 R.MNVLAD Splice@chr  | 3.60E-11 | 8.81E-04 |
| 22Feb2011 | 20219 | 624.67  | 11.45771 | 3 R.MNVLAD Splice@chr  | 7.83E-11 | 0.002123 |
| 22Feb2011 | 19176 | 624.67  | 11.45771 | 3 R.MNVLAD Splice@chr  | 1.66E-10 | 0.003791 |
| 22Feb2011 | 19132 | 624.67  | 11.45771 | 3 R.MNVLAD Splice@chr  | 4.33E-11 | 0.001819 |
| 22Feb2011 | 19977 | 624.67  | 11.45771 | 3 R.MNVLAD Splice@chr  | 4.51E-11 | 0.001365 |
| 22Feb2011 | 19865 | 624.34  | 18.60468 | 3 R.MNVLAD Splice@chr  | 1.64E-11 | 5.83E-04 |
| 22Feb2011 | 20111 | 624.34  | 18.60468 | 3 R.MNVLAD Splice@chr  | 3.78E-11 | 0.001122 |
| 22Feb2011 | 19717 | 624.33  | 2.545903 | 3 R.MNVLAD Splice@chr  | 1.22E-10 | 0.002571 |
| 22Feb2011 | 18493 | 624.67  | 11.45771 | 3 R.MNVLAD Splice@chr  | 1.78E-10 | 0.004158 |
| 22Feb2011 | 19202 | 624.67  | 11.45771 | 3 R.MNVLAD Splice@chr  | 2.65E-11 | 7.05E-04 |
| 22Feb2011 | 19378 | 624.34  | 18.60468 | 3 R.MNVLAD Splice@chr  | 1.22E-10 | 0.003244 |

|           |       |         |          |                          |          |          |
|-----------|-------|---------|----------|--------------------------|----------|----------|
| 22Feb2011 | 19472 | 624.67  | 11.45771 | 3 R.MNVLAD Splice@chr    | 8.01E-12 | 0        |
| 22Feb2011 | 22368 | 624.67  | 11.45771 | 3 R.MNVLAD Splice@chr    | 9.39E-11 | 0.002553 |
| 22Feb2011 | 24602 | 789.43  | -18.992  | 3 K.VIFPNSY7 chrX@1610   | 6.61E-11 | 0.002191 |
| 22Feb2011 | 12576 | 504.26  | -3.94163 | 2 _._DFLANSV Splice@chr  | 4.08E-10 | 0.008098 |
| 22Feb2011 | 25037 | 735.06  | 24.31965 | 3 _._EHLISK+1 Splice@chr | 4.12E-10 | 0.00864  |
| 22Feb2011 | 2424  | 501.27  | -13.8593 | 2 K.VIDDLGN chrX@2305    | 2.15E-10 | 0.004424 |
| 22Feb2011 | 17301 | 795.93  | -24.4159 | 4 _._YLVPLK+1 chr3@1026  | 2.70E-10 | 0.00561  |
| 22Feb2011 | 7154  | 605.83  | -11.8653 | 2 K.KISSIANV Splice@chr  | 1.63E-10 | 0.002865 |
| 22Feb2011 | 7647  | 605.83  | -11.8653 | 2 K.KISSIANV Splice@chr  | 3.17E-10 | 0.006085 |
| 22Feb2011 | 15347 | 772.41  | -15.2968 | 3 K.LGPD LKG chr1@2678   | 4.06E-10 | 0.009308 |
| 22Feb2011 | 20850 | 669.84  | -15.0391 | 4 _._IWSRCGA chr5@1902   | 3.35E-10 | 0.005098 |
| 22Feb2011 | 3279  | 727.37  | -5.3778  | 1 K.GHSADIK chr2@3586    | 5.73E-10 | 0.009533 |
| 22Feb2011 | 12439 | 678.85  | -17.9183 | 2 K.NIYSNKTI chr4@1638   | 5.41E-10 | 0.008903 |
| 22Feb2011 | 11406 | 678.85  | -17.9183 | 2 K.NIYSNKTI chr4@1638   | 4.07E-10 | 0.009835 |
| 22Feb2011 | 12715 | 678.85  | -17.9183 | 2 K.NIYSNKTI chr4@1638   | 2.61E-10 | 0.005237 |
| 22Feb2011 | 25129 | 837.41  | 18.19507 | 4 R.DM+15.9 Splice@chr   | 2.84E-10 | 0.0061   |
| 22Feb2011 | 15513 | 759.4   | -11.2328 | 2 K.K+14.016 chr5@1378   | 2.91E-10 | 0.006756 |
| 22Feb2011 | 21614 | 670.09  | -24.903  | 4 _._NGEKQT1 chr3@3375   | 4.00E-10 | 0.007105 |
| 22Feb2011 | 996   | 408.54  | -16.0748 | 3 K.NKGKKM chr1@6698     | 3.38E-11 | 0.001302 |
| 22Feb2011 | 17934 | 763.93  | -23.6    | 2 K.VCLSIFSF chrX@1447   | 3.42E-11 | 0.001276 |
| 22Feb2011 | 17089 | 763.93  | -23.6    | 2 K.VCLSIFSF chrX@1447   | 2.36E-11 | 9.70E-04 |
| 22Feb2011 | 1532  | 498.27  | -0.6736  | 2 R.RRGPSHE Splice@chr   | 6.14E-10 | 0.009985 |
| 22Feb2011 | 1115  | 477.23  | -13.5853 | 2 R.SSSKGST1 Splice@chr  | 1.73E-10 | 0.003591 |
| 22Feb2011 | 20457 | 729.81  | 8.528477 | 5 K.IRFKILFSC chr5@7088  | 2.28E-10 | 0.004862 |
| 22Feb2011 | 14710 | 871.43  | -27.7267 | 1 R.LPVPECR chrX@1092    | 1.62E-10 | 0.002865 |
| 22Feb2011 | 15521 | 871.43  | -27.7267 | 1 R.LPVPECR chrX@1092    | 1.76E-10 | 0.004007 |
| 22Feb2011 | 6898  | 595.3   | -6.5729  | 2 R.INNCLTEI chr2@1305   | 3.17E-13 | 0        |
| 22Feb2011 | 7975  | 595.3   | -6.5729  | 2 R.INNCLTEI Splice@chr  | 1.39E-12 | 0        |
| 22Feb2011 | 7465  | 595.3   | -6.5729  | 2 R.INNCLTEI chr2@1305   | 6.83E-13 | 1.35E-04 |
| 22Feb2011 | 7801  | 595.3   | -6.5729  | 2 R.INNCLTEI chr2@1305   | 3.40E-11 | 8.30E-04 |
| 22Feb2011 | 7800  | 595.3   | -6.5729  | 2 R.INNCLTEI chr2@1305   | 1.31E-11 | 4.42E-04 |
| 22Feb2011 | 7928  | 595.3   | -6.5729  | 2 R.INNCLTEI chr2@1305   | 3.18E-13 | 0        |
| 22Feb2011 | 23038 | 723.13  | -13.0162 | 4 _._KKFCM+1 chrX@1658   | 1.41E-10 | 0.002016 |
| 22Feb2011 | 23860 | 918.49  | -8.0344  | 4 R.WFCTSFS chr1@4544    | 1.68E-10 | 0.003482 |
| 22Feb2011 | 293   | 527.64  | -7.64915 | 3 R.WETHQV chr2@1195     | 2.81E-10 | 0.005428 |
| 22Feb2011 | 10020 | 586.65  | -16.2579 | 3 K.LTLSTTIRI chr1@1361  | 3.86E-10 | 0.008661 |
| 22Feb2011 | 13436 | 851.44  | 16.22019 | 1 R.GEEVVYR chr1@4158    | 4.07E-10 | 0.008294 |
| 22Feb2011 | 12482 | 851.44  | 16.22019 | 1 R.GEEVVYR chr1@4158    | 2.79E-10 | 0.005199 |
| 22Feb2011 | 27131 | 744.92  | -4.34843 | 2 R.K+14.016 Splice@chr  | 2.74E-10 | 0.006036 |
| 22Feb2011 | 12306 | 564.65  | -10.3233 | 3 R.ILNIEM+1 chr2@9116   | 2.34E-11 | 7.89E-04 |
| 22Feb2011 | 12095 | 564.65  | -10.3233 | 3 R.ILNIEM+1 chr2@9116   | 1.36E-11 | 6.38E-04 |
| 22Feb2011 | 22544 | 864.13  | -0.4472  | 3 K.MIKLFFIS chr4@1608   | 4.40E-10 | 0.009678 |
| 22Feb2011 | 15809 | 1045.56 | -24.6064 | 3 V.LKVSNMI Splice@chr   | 1.61E-10 | 0.003024 |
| 22Feb2011 | 28162 | 1001.8  | -13.563  | 3 _._NRDWSV Splice@chr   | 4.78E-11 | 0.001389 |
| 22Feb2011 | 20300 | 599.91  | -10.9074 | 5 _._CKKKM+1 chrX@1325   | 5.89E-10 | 0.009922 |
| 22Feb2011 | 22051 | 760.73  | 13.06861 | 3 R.ICKNFKIS chr3@2982   | 4.78E-10 | 0.009633 |
| 22Feb2011 | 19495 | 981.48  | -12.6818 | 3 K.LKM+15.1 chr2@9331   | 2.64E-10 | 0.006724 |

|           |       |         |          |                         |          |          |
|-----------|-------|---------|----------|-------------------------|----------|----------|
| 22Feb2011 | 10520 | 432.25  | -5.09518 | 5 R.RIRMKLV chrX@1735   | 3.25E-10 | 0.009128 |
| 22Feb2011 | 16827 | 787.39  | 13.24337 | 2 R.HPCIGGN chr5@6888   | 4.57E-10 | 0.009869 |
| 22Feb2011 | 19971 | 1109.91 | -6.80811 | 3 R.ISGESGHI Splice@chr | 4.03E-10 | 0.008031 |
| 22Feb2011 | 27479 | 1136.93 | -1.8447  | 3 K.MNNNEI chr4@1031    | 1.83E-10 | 0.003715 |
| 22Feb2011 | 946   | 455.26  | -3.82936 | 2 K.PTPTGPA chr2@1098   | 2.39E-11 | 6.36E-04 |
| 22Feb2011 | 1180  | 455.26  | -3.82936 | 2 K.PTPTGPA chr2@1098   | 2.42E-10 | 0.006041 |
| 22Feb2011 | 320   | 455.26  | -3.82936 | 2 K.PTPTGPA chr2@1098   | 4.10E-11 | 0.001028 |
| 22Feb2011 | 358   | 455.26  | -3.82936 | 2 K.PTPTGPA Splice@chr  | 1.39E-10 | 0.003105 |
| 22Feb2011 | 919   | 455.26  | -3.82936 | 2 K.PTPTGPA chr2@1098   | 1.11E-10 | 0.002673 |
| 22Feb2011 | 897   | 455.26  | -3.82936 | 2 K.PTPTGPA Splice@chr  | 1.79E-10 | 0.004158 |
| 22Feb2011 | 5822  | 488.28  | -6.76393 | 2 K.LSVASSG chr5@5475   | 5.58E-10 | 0.009642 |
| 22Feb2011 | 21939 | 655.42  | 8.767189 | 2 _VLLPEGIK chr1@1115   | 6.30E-11 | 0.001523 |
| 22Feb2011 | 25274 | 760.4   | -0.61553 | 3 F.SSSIKKVR chrX@8628  | 3.68E-10 | 0.005396 |
| 22Feb2011 | 21713 | 605.29  | 15.45391 | 2 R.RCDGSSC Splice@chr  | 4.47E-10 | 0.008549 |
| 22Feb2011 | 21158 | 605.8   | 29.243   | 2 R.RCDGSSC Splice@chr  | 3.22E-10 | 0.00834  |
| 22Feb2011 | 21457 | 605.29  | 15.45391 | 2 R.RCDGSSC Splice@chr  | 4.45E-10 | 0.008737 |
| 22Feb2011 | 1746  | 592.28  | -13.7905 | 2 _KMSCETV chr1@1427    | 1.68E-10 | 0.004619 |
| 22Feb2011 | 23161 | 998.49  | -29.0436 | 3 K.HLK+14.C chr5@1571  | 5.21E-11 | 0.001575 |
| 22Feb2011 | 6142  | 419.9   | -13.268  | 3 R.TVQFHA chr5@6035    | 6.06E-11 | 0.001602 |
| 22Feb2011 | 24074 | 873     | 26.45884 | 2 R.WRNILG chr2@1140    | 3.61E-10 | 0.007563 |
| 22Feb2011 | 20663 | 1114.56 | 0.43849  | 3 K.NENLKFF chr3@1126   | 1.14E-10 | 0.002594 |
| 22Feb2011 | 20719 | 1114.56 | 0.43849  | 3 K.NENLKFF chr3@1126   | 2.24E-10 | 0.00449  |
| 22Feb2011 | 20092 | 1114.56 | 0.43849  | 3 K.NENLKFF chr3@1126   | 2.03E-10 | 0.004457 |
| 22Feb2011 | 11327 | 733.39  | 12.88616 | 2 K.DRWLLD chr1@4422    | 6.37E-11 | 0.002543 |
| 22Feb2011 | 28501 | 405.72  | 26.24185 | 2 K.NTYAVSR chrX@1117   | 2.17E-10 | 0.005055 |
| 22Feb2011 | 23852 | 728.63  | 4.552982 | 4 K.FQKPLK chr4@1311    | 2.94E-10 | 0.006414 |
| 22Feb2011 | 608   | 460.22  | -17.367  | 3 K.SNCVGRI chr5@6211   | 1.86E-10 | 0.004561 |
| 22Feb2011 | 10980 | 601.34  | -3.05006 | 3 R.LNIIANIIT chr4@1177 | 2.54E-10 | 0.005952 |
| 22Feb2011 | 20529 | 983.19  | -22.1083 | 3 Q.APILQVP Splice@chr  | 6.53E-11 | 0.001907 |
| 22Feb2011 | 21949 | 799.41  | 18.17766 | 3 _CDSK+14 chr1@1164    | 1.23E-10 | 0.004064 |
| 22Feb2011 | 23836 | 845.42  | -21.0093 | 3 R.ESSK+14. chrX@1632  | 3.92E-10 | 0.00737  |
| 22Feb2011 | 14170 | 506.89  | -9.45894 | 5 E.ISLK+14.C chr5@9884 | 3.80E-10 | 0.0074   |
| 22Feb2011 | 8624  | 758.97  | -24.1467 | 5 K.NEKNRGI chr1@1383   | 1.94E-10 | 0.004616 |
| 22Feb2011 | 7210  | 542.8   | -24.6707 | 2 K.LQMNLQ Splice@chr   | 1.24E-10 | 0.002554 |
| 22Feb2011 | 7819  | 526.29  | -28.893  | 3 R.LNIFSMI chr1@2078   | 5.94E-10 | 0.009922 |
| 22Feb2011 | 7826  | 526.29  | -28.893  | 3 R.LNIFSMI chr1@2078   | 3.62E-10 | 0.00816  |
| 22Feb2011 | 17155 | 625.7   | -10.9801 | 3 K.RSLISNLY chr1@5925  | 3.94E-10 | 0.008644 |
| 22Feb2011 | 17078 | 625.7   | -10.9801 | 3 K.RSLISNLY chr1@5925  | 2.91E-10 | 0.007683 |
| 22Feb2011 | 23035 | 950.48  | 8.716191 | 2 K.NLSLCTTI chr2@1355  | 3.14E-10 | 0.006659 |
| 22Feb2011 | 17910 | 1031.51 | -27.1654 | 3 R.SSCLSVNI chr1@7647  | 3.88E-10 | 0.007129 |
| 22Feb2011 | 4090  | 476.75  | 14.90036 | 2 _LSTSVSDI Splice@chr  | 2.61E-10 | 0.004665 |
| 22Feb2011 | 4231  | 476.75  | 14.90036 | 2 _LSTSVSDI Splice@chr  | 8.93E-11 | 0.002151 |
| 22Feb2011 | 11000 | 618.33  | -16.8692 | 2 R.ELSRIAGF chr2@1295  | 3.98E-10 | 0.005632 |
| 22Feb2011 | 12126 | 618.33  | -16.8692 | 2 R.ELSRIAGF chr2@1295  | 2.78E-10 | 0.006776 |
| 22Feb2011 | 11544 | 618.34  | -0.64143 | 2 R.ELSRIAGF chr2@1295  | 3.93E-10 | 0.007032 |
| 22Feb2011 | 11765 | 618.34  | -0.64143 | 2 R.ELSRIAGF chr2@1295  | 3.13E-10 | 0.007136 |
| 22Feb2011 | 22188 | 900.14  | -0.06711 | 3 R.FRFHPTM Splice@chr  | 5.52E-10 | 0.009642 |

|           |       |         |          |                         |          |          |
|-----------|-------|---------|----------|-------------------------|----------|----------|
| 22Feb2011 | 22337 | 900.14  | -0.06711 | 3 R.FRHHPTM Splice@chr  | 6.20E-10 | 0.009985 |
| 22Feb2011 | 22199 | 900.14  | -0.06711 | 3 R.FRHHPTM Splice@chr  | 3.46E-10 | 0.00749  |
| 22Feb2011 | 18037 | 955.51  | 13.59666 | 2 R.WFLCLSV chrX@9829   | 1.83E-10 | 0.00252  |
| 22Feb2011 | 19652 | 955.51  | 13.59666 | 2 R.WFLCLSV chrX@9829   | 4.54E-10 | 0.007955 |
| 22Feb2011 | 19707 | 955.51  | 13.59666 | 2 R.WFLCLSV chrX@9829   | 3.14E-10 | 0.005949 |
| 22Feb2011 | 20094 | 955.51  | 13.59666 | 2 R.WFLCLSV chrX@9829   | 1.27E-10 | 0.003594 |
| 22Feb2011 | 3228  | 466.24  | -11.6863 | 2 _..IAGTEHFI chr3@1255 | 5.60E-10 | 0.009437 |
| 22Feb2011 | 6663  | 454.75  | 8.810814 | 2 R.ESIFGVTF chr4@1629  | 1.27E-10 | 0.002929 |
| 22Feb2011 | 7017  | 454.75  | 8.810814 | 2 R.ESIFGVTF chr4@1629  | 4.10E-10 | 0.009736 |
| 22Feb2011 | 27298 | 703.45  | 14.19081 | 4 K.LINLRFSK chr2@1355  | 3.51E-10 | 0.007491 |
| 22Feb2011 | 13817 | 629.82  | 22.71354 | 2 K.REKYCM+ chr1@2130   | 1.02E-10 | 0.002905 |
| 22Feb2011 | 3528  | 471.27  | -14.7958 | 2 K.TTWLPVF chr5@5962   | 5.52E-11 | 0.001575 |
| 22Feb2011 | 10317 | 548.76  | 8.757186 | 2 _..NGM+15 chr2@1067   | 1.39E-10 | 0.003063 |
| 22Feb2011 | 27221 | 697.9   | -15.2923 | 2 K.KKKK+14 chr3@7501   | 3.94E-10 | 0.008151 |
| 22Feb2011 | 12162 | 687.39  | -5.15751 | 2 K.NFLSNAK chr4@1638   | 3.99E-12 | 1.23E-04 |
| 22Feb2011 | 19217 | 753.39  | 21.06722 | 2 _..SARM+15 chrX@1189  | 3.86E-10 | 0.007245 |
| 22Feb2011 | 18861 | 837.42  | -25.9776 | 2 R.GLQVDV chr2@1395    | 2.44E-10 | 0.003925 |
| 22Feb2011 | 11502 | 497.28  | 15.31215 | 2 K.NVSSPFSI chrX@7887  | 2.10E-10 | 0.004832 |
| 22Feb2011 | 783   | 594.28  | -11.4194 | 2 K.LSSNGTT chr2@9532   | 1.47E-10 | 0.003578 |
| 22Feb2011 | 22789 | 772.42  | 6.14872  | 3 V.QTLFVTL: Splice@chr | 4.80E-10 | 0.008392 |
| 22Feb2011 | 22011 | 772.42  | 6.14872  | 3 V.QTLFVTL: Splice@chr | 2.12E-10 | 0.005051 |
| 22Feb2011 | 2379  | 452.77  | -8.91683 | 2 _..MVGVSr chr5@1835   | 1.62E-10 | 0.002094 |
| 22Feb2011 | 3064  | 452.77  | -8.91683 | 2 _..MVGVSr chr5@1835   | 3.71E-10 | 0.009264 |
| 22Feb2011 | 3383  | 452.77  | -8.91683 | 2 _..MVGVSr chr5@1835   | 1.40E-10 | 0.003929 |
| 22Feb2011 | 21422 | 1041.53 | -19.0049 | 2 R.NFQENGI chr1@1316   | 3.75E-10 | 0.007963 |
| 22Feb2011 | 7632  | 727.01  | -1.20457 | 3 R.KVVGCSs Splice@chr  | 1.12E-11 | 7.33E-04 |
| 22Feb2011 | 7730  | 727.01  | -1.20457 | 3 R.KVVGCSs Splice@chr  | 9.04E-13 | 0        |
| 22Feb2011 | 7743  | 727.01  | -1.20457 | 3 R.KVVGCSs Splice@chr  | 1.10E-11 | 6.28E-04 |
| 22Feb2011 | 7641  | 727.01  | -1.20457 | 3 R.KVVGCSs Splice@chr  | 5.70E-11 | 0.001131 |
| 22Feb2011 | 7591  | 727.01  | -1.20457 | 3 R.KVVGCSs Splice@chr  | 5.99E-11 | 0.001982 |
| 22Feb2011 | 7252  | 727.01  | -1.20457 | 3 R.KVVGCSs Splice@chr  | 1.57E-10 | 0.003297 |
| 22Feb2011 | 7159  | 727.01  | -1.20457 | 3 R.KVVGCSs Splice@chr  | 6.94E-11 | 0.002207 |
| 22Feb2011 | 7092  | 727.02  | 12.58928 | 3 R.KVVGCSs Splice@chr  | 2.65E-11 | 9.95E-04 |
| 22Feb2011 | 7128  | 727.01  | -1.20457 | 3 R.KVVGCSs Splice@chr  | 8.94E-13 | 0        |
| 22Feb2011 | 7188  | 727.01  | -1.20457 | 3 R.KVVGCSs Splice@chr  | 1.02E-11 | 4.07E-04 |
| 22Feb2011 | 7884  | 727.01  | -1.20457 | 3 R.KVVGCSs Splice@chr  | 2.36E-11 | 5.34E-04 |
| 22Feb2011 | 7791  | 727.01  | -1.20457 | 3 R.KVVGCSs Splice@chr  | 1.23E-12 | 0        |
| 22Feb2011 | 7614  | 727.01  | -1.20457 | 3 R.KVVGCSs Splice@chr  | 1.59E-11 | 2.14E-04 |
| 22Feb2011 | 7269  | 727.01  | -1.20457 | 3 R.KVVGCSs Splice@chr  | 5.25E-12 | 0        |
| 22Feb2011 | 7594  | 727.01  | -1.20457 | 3 R.KVVGCSs Splice@chr  | 2.10E-12 | 2.26E-04 |
| 22Feb2011 | 8126  | 727.01  | -1.20457 | 3 R.KVVGCSs Splice@chr  | 5.73E-11 | 0.001624 |
| 22Feb2011 | 8235  | 727.01  | -1.20457 | 3 R.KVVGCSs Splice@chr  | 2.11E-13 | 0        |
| 22Feb2011 | 18484 | 855.71  | -1.57104 | 4 R.AMLIIGF5 chr2@1176  | 3.03E-10 | 0.006566 |
| 22Feb2011 | 25364 | 826.39  | 18.8328  | 2 R.FM+15.9 chrX@2659   | 3.74E-10 | 0.005396 |
| 22Feb2011 | 21047 | 756.73  | 13.13779 | 3 K.FPTRIDN: Splice@chr | 3.47E-10 | 0.007236 |
| 22Feb2011 | 19328 | 582.98  | 2.764571 | 3 R.IPTNLHEI Splice@chr | 6.54E-10 | 0.009339 |
| 22Feb2011 | 21220 | 582.98  | 2.764571 | 3 R.IPTNLHEI Splice@chr | 3.08E-10 | 0.006915 |

|           |       |         |          |                         |          |          |
|-----------|-------|---------|----------|-------------------------|----------|----------|
| 22Feb2011 | 22645 | 845.44  | -12.7933 | 2 R.SSFGTRK chr5@2049   | 1.16E-11 | 7.41E-04 |
| 22Feb2011 | 15392 | 909.99  | -20.8589 | 2 R.EFHVITFL chr1@8228  | 4.40E-10 | 0.008503 |
| 22Feb2011 | 15412 | 909.99  | -20.8589 | 2 R.EFHVITFL chr1@8228  | 1.46E-10 | 0.003167 |
| 22Feb2011 | 15749 | 909.99  | -20.8589 | 2 R.EFHVITFL chr1@8228  | 3.31E-10 | 0.006443 |
| 22Feb2011 | 14590 | 909.99  | -20.8589 | 2 R.EFHVITFL chr1@8228  | 6.03E-11 | 0.001215 |
| 22Feb2011 | 15626 | 909.99  | -20.8589 | 2 R.EFHVITFL chr1@8228  | 3.44E-10 | 0.007283 |
| 22Feb2011 | 15614 | 909.99  | -20.8589 | 2 R.EFHVITFL chr1@8228  | 6.08E-10 | 0.009985 |
| 22Feb2011 | 14479 | 909.99  | -20.8589 | 2 R.EFHVITFL chr1@8228  | 4.02E-10 | 0.009247 |
| 22Feb2011 | 15419 | 909.99  | -20.8589 | 2 R.EFHVITFL chr1@8228  | 1.03E-10 | 0.003054 |
| 22Feb2011 | 15029 | 909.99  | -20.8589 | 2 R.EFHVITFL chr1@8228  | 2.72E-11 | 7.50E-04 |
| 22Feb2011 | 14974 | 909.99  | -20.8589 | 2 R.EFHVITFL chr1@8228  | 2.02E-10 | 0.004457 |
| 22Feb2011 | 16171 | 909.99  | -20.8589 | 2 R.EFHVITFL chr1@8228  | 1.27E-10 | 0.003077 |
| 22Feb2011 | 15986 | 909.99  | -20.8589 | 2 R.EFHVITFL chr1@8228  | 6.22E-11 | 0.002319 |
| 22Feb2011 | 25812 | 707.4   | 7.603615 | 3 R.CTNLKGK chrX@2878   | 3.48E-10 | 0.00749  |
| 22Feb2011 | 5704  | 532.28  | -22.4021 | 2 R.WTTRTSF chr2@1135   | 1.74E-10 | 0.003899 |
| 22Feb2011 | 14678 | 647.33  | 7.83813  | 2 N.FWDIFPC chrX@1615   | 2.20E-10 | 0.004214 |
| 22Feb2011 | 5399  | 450.26  | -1.76617 | 4 R.LHRQM+ Splice@chr   | 5.56E-11 | 0.002245 |
| 22Feb2011 | 5345  | 450.51  | -3.63304 | 4 R.LHRQM+ Splice@chr   | 4.49E-11 | 0.002045 |
| 22Feb2011 | 6967  | 450.26  | -1.76617 | 4 R.LHRQM+ Splice@chr   | 2.82E-10 | 0.008199 |
| 22Feb2011 | 270   | 507.78  | 0.272181 | 4 K.NIGK+14. chr1@2387  | 4.71E-10 | 0.00701  |
| 22Feb2011 | 24944 | 715.38  | 13.93426 | 3 K.FAKPISN1 chr3@1080  | 3.27E-10 | 0.007093 |
| 22Feb2011 | 21403 | 706.85  | -8.17577 | 2 K.MTEIDLF chr4@2706   | 4.63E-10 | 0.007955 |
| 22Feb2011 | 24613 | 487.3   | 19.09999 | 2 K.TAKIGGG chr2@1495   | 2.79E-10 | 0.005602 |
| 22Feb2011 | 26884 | 964.82  | -12.8341 | 3 N.GFEPRLA Splice@chr  | 3.20E-10 | 0.007011 |
| 22Feb2011 | 2783  | 508.26  | -23.2824 | 2 K.RGAPEM chr5@1362    | 3.46E-10 | 0.00704  |
| 24Mar2011 | 13911 | 809.01  | -7.47824 | 2 R.FTTELLLL chr3@8986  | 4.81E-10 | 0.006278 |
| 22Feb2011 | 18499 | 678.89  | -0.40389 | 2 D.LPEMREL chr4@1907   | 2.32E-10 | 0.00565  |
| 22Feb2011 | 21746 | 829.44  | 17.82979 | 2 R.WGSRAY chr3@1277    | 4.74E-10 | 0.008298 |
| 22Feb2011 | 15877 | 765.03  | -20.7701 | 3 R.MLTFCRK chrX@9240   | 3.92E-11 | 0.001331 |
| 22Feb2011 | 20965 | 970.25  | -10.7291 | 3 R.KKNPSKS chr3@3496   | 2.33E-10 | 0.00302  |
| 22Feb2011 | 26828 | 1012.46 | -0.84482 | 2 L.AMEEEIA Splice@chr  | 3.54E-11 | 9.35E-04 |
| 22Feb2011 | 26399 | 1012.46 | -0.84482 | 2 L.AMEEEIA Splice@chr  | 1.39E-10 | 0.00272  |
| 22Feb2011 | 26125 | 1012.47 | 8.991261 | 2 L.AMEEEIA Splice@chr  | 1.94E-10 | 0.003729 |
| 22Feb2011 | 27434 | 1012.46 | -0.84482 | 2 L.AMEEEIA Splice@chr  | 2.02E-10 | 0.004538 |
| 22Feb2011 | 26325 | 1012.46 | -0.84482 | 2 L.AMEEEIA Splice@chr  | 3.80E-10 | 0.008909 |
| 22Feb2011 | 25542 | 1012.97 | 7.332861 | 2 L.AMEEEIA Splice@chr  | 1.15E-12 | 0        |
| 22Feb2011 | 25202 | 1012.47 | 8.991261 | 2 L.AMEEEIA Splice@chr  | 1.90E-10 | 0.00431  |
| 22Feb2011 | 15301 | 656.39  | 25.61116 | 2 R.PMVVYSI Splice@chr  | 5.21E-10 | 0.009717 |
| 22Feb2011 | 15214 | 656.39  | 25.61116 | 2 R.PMVVYSI Splice@chr  | 1.28E-11 | 0        |
| 22Feb2011 | 11889 | 609.32  | -4.6154  | 2 K.LSAENSEI chr2@1065  | 1.73E-10 | 0.004107 |
| 22Feb2011 | 27521 | 968.06  | -1.79859 | 2 K.KRK+14.C chr4@7688  | 4.77E-10 | 0.008877 |
| 22Feb2011 | 14518 | 565.31  | -24.5598 | 5 K.IIK+14.01 chr4@7046 | 2.60E-10 | 0.005455 |
| 22Feb2011 | 13829 | 565.31  | -24.5598 | 5 K.IIK+14.01 chr4@7046 | 2.77E-10 | 0.006791 |
| 22Feb2011 | 3364  | 586.32  | -9.69776 | 2 K.AEREAKK chr5@5826   | 4.03E-10 | 0.008818 |
| 22Feb2011 | 11309 | 983.51  | 6.898683 | 3 K.GTETQLK Splice@chr  | 4.36E-10 | 0.00968  |
| 22Feb2011 | 22849 | 894.27  | 25.30693 | 4 R.RSVARRP Splice@chr  | 6.03E-12 | 3.66E-04 |
| 22Feb2011 | 22070 | 650.37  | 11.46721 | 2 R.IDERLHFI chr5@1911  | 3.83E-10 | 0.009749 |

|           |       |         |          |                         |          |          |
|-----------|-------|---------|----------|-------------------------|----------|----------|
| 22Feb2011 | 26957 | 1082.23 | 7.925014 | 3 R.VIVTEIDP Splice@chr | 2.03E-11 | 8.76E-04 |
| 22Feb2011 | 27684 | 1082.23 | 7.925014 | 3 R.VIVTEIDP Splice@chr | 1.90E-11 | 3.68E-04 |
| 22Feb2011 | 14130 | 818.12  | -21.4993 | 4 _._FFAECGS chr5@1211  | 3.22E-10 | 0.006884 |
| 22Feb2011 | 25002 | 944     | -22.9556 | 2 R.STRRRDS chr4@4664   | 6.19E-11 | 0.001523 |
| 22Feb2011 | 6821  | 704.37  | 24.29795 | 2 _._EESANN chr5@2063   | 4.07E-10 | 0.008753 |
| 22Feb2011 | 24182 | 734.84  | -1.8089  | 4 R.DSIEDEV chr2@4474   | 3.44E-10 | 0.007662 |
| 22Feb2011 | 13789 | 661.34  | -19.4695 | 2 K.QK+14.0 chr3@7397   | 4.00E-10 | 0.007982 |
| 22Feb2011 | 13870 | 661.34  | -19.4695 | 2 K.QK+14.0 chr3@7397   | 5.42E-11 | 0.002518 |
| 22Feb2011 | 13091 | 661.34  | -19.4695 | 2 K.QK+14.0 chr3@7397   | 2.23E-10 | 0.004214 |
| 22Feb2011 | 14412 | 661.34  | -19.4695 | 2 K.QK+14.0 chr3@7397   | 9.08E-11 | 0.00249  |
| 22Feb2011 | 27783 | 752.15  | 2.521031 | 3 K.NFFIKILIK chr2@1353 | 2.45E-10 | 0.005524 |
| 22Feb2011 | 27661 | 752.14  | -10.9194 | 3 K.NFFIKILIK chr2@1353 | 4.73E-11 | 0.001356 |
| 22Feb2011 | 27204 | 752.14  | -10.9194 | 3 K.NFFIKILIK chr2@1353 | 1.91E-10 | 0.004344 |
| 22Feb2011 | 27970 | 752.14  | -10.9194 | 3 K.NFFIKILIK chr2@1353 | 5.67E-11 | 0.001419 |
| 22Feb2011 | 12218 | 617.34  | -12.5766 | 2 K.SVLDLK+ chr4@4594   | 5.29E-10 | 0.008619 |
| 22Feb2011 | 2027  | 506.27  | -18.9248 | 3 K.DKM+15. chr2@3373   | 2.12E-10 | 0.004543 |
| 22Feb2011 | 13441 | 742.36  | -17.5875 | 2 _._DHLDCLC Splice@chr | 3.07E-10 | 0.006146 |
| 22Feb2011 | 21241 | 949.97  | -10.649  | 2 _._M+15.99 chr4@8232  | 2.54E-10 | 0.005688 |
| 22Feb2011 | 25905 | 996.47  | 28.15381 | 3 P.SSSSGVD Splice@chr  | 1.18E-10 | 0.00285  |
| 22Feb2011 | 17584 | 768.4   | -1.07304 | 2 _._TFETNSLL chrX@1703 | 4.06E-10 | 0.009901 |
| 22Feb2011 | 22814 | 974.79  | -20.7107 | 3 K.AVPFVPI Splice@chr  | 5.69E-11 | 0.001982 |
| 22Feb2011 | 1065  | 520.26  | -29.1501 | 2 R.IGEYNKS chr5@1070   | 4.67E-10 | 0.009011 |
| 22Feb2011 | 20983 | 716.42  | 7.191084 | 4 F.CTFRSLTI Splice@chr | 4.28E-10 | 0.008433 |
| 22Feb2011 | 20009 | 716.42  | 7.191084 | 4 F.CTFRSLTI Splice@chr | 4.18E-10 | 0.008174 |
| 22Feb2011 | 20148 | 809.38  | 16.28276 | 2 K.YK+14.01 chr5@2885  | 2.84E-10 | 0.006104 |
| 22Feb2011 | 17079 | 746.39  | -16.4649 | 3 K.SWYDGG chr1@3130    | 3.68E-11 | 0.001959 |
| 22Feb2011 | 4661  | 455.26  | 19.79669 | 3 R.EYTFVKP chr4@9557   | 1.29E-10 | 0.003361 |
| 22Feb2011 | 26534 | 572.31  | -3.88268 | 3 _._TFEHPEK chrX@1569  | 2.00E-10 | 0.004338 |
| 22Feb2011 | 26500 | 857.96  | -5.09419 | 2 _._TFEHPEK chrX@1569  | 1.53E-10 | 0.002986 |
| 22Feb2011 | 1457  | 471.77  | 6.547458 | 2 _._LPAALNS chr3@3498  | 3.82E-10 | 0.007593 |
| 22Feb2011 | 3069  | 459.57  | -5.67895 | 3 R.SDIDK+1 chr5@3678   | 7.31E-11 | 0.002728 |
| 22Feb2011 | 804   | 464.26  | 3.952624 | 2 R.VVVM+1 chr5@1689    | 3.34E-10 | 0.007036 |
| 22Feb2011 | 785   | 464.26  | 3.952624 | 2 R.VVVM+1 chr5@1689    | 2.56E-10 | 0.005314 |
| 22Feb2011 | 355   | 464.26  | 3.952624 | 2 R.VVVM+1 chr5@1689    | 2.70E-10 | 0.00561  |
| 22Feb2011 | 749   | 464.26  | 3.952624 | 2 R.VVVM+1 chr5@1689    | 2.11E-10 | 0.004496 |
| 22Feb2011 | 446   | 464.26  | 3.952624 | 2 R.VVVM+1 chr5@1689    | 4.34E-10 | 0.009139 |
| 22Feb2011 | 1598  | 464.26  | 3.952624 | 2 R.VVVM+1 chr5@1689    | 2.58E-10 | 0.005179 |
| 22Feb2011 | 326   | 464.26  | 3.952624 | 2 R.VVVM+1 chr5@1689    | 3.19E-10 | 0.00697  |
| 22Feb2011 | 285   | 464.26  | 3.952624 | 2 R.VVVM+1 chr5@1689    | 2.82E-10 | 0.005939 |
| 22Feb2011 | 453   | 464.26  | 3.952624 | 2 R.VVVM+1 chr5@1689    | 3.04E-10 | 0.006659 |
| 22Feb2011 | 18212 | 754.39  | -19.8483 | 2 R.SK+14.01 chrX@8720  | 6.12E-11 | 0.001671 |
| 22Feb2011 | 2803  | 481.78  | 14.47278 | 2 K.LSISSSGR chr2@2189  | 3.30E-10 | 0.005015 |
| 22Feb2011 | 13461 | 675.84  | 5.064942 | 2 K.IYVPSSPS chr4@5353  | 3.27E-10 | 0.008367 |
| 22Feb2011 | 6003  | 510.75  | 13.59037 | 2 _._ATGLRVC chrX@1431  | 2.71E-10 | 0.006733 |
| 22Feb2011 | 5920  | 510.75  | 13.59037 | 2 _._ATGLRVC chrX@1431  | 4.27E-10 | 0.00834  |
| 22Feb2011 | 5781  | 510.75  | 13.59037 | 2 _._ATGLRVC chrX@1431  | 2.60E-10 | 0.005179 |
| 22Feb2011 | 18478 | 861.48  | -18.629  | 2 R.SLETTSK+ chr5@1311  | 5.13E-10 | 0.009259 |

|           |       |         |          |                         |          |          |
|-----------|-------|---------|----------|-------------------------|----------|----------|
| 22Feb2011 | 23757 | 968.19  | 15.39814 | 3 R.NSNQKN chr1@1436    | 1.05E-10 | 0.002673 |
| 22Feb2011 | 24643 | 968.52  | 10.79206 | 3 R.NSNQKN chr1@1436    | 4.06E-10 | 0.008896 |
| 22Feb2011 | 25929 | 1045.56 | -23.9175 | 3 C.VPNCGFk chr5@2197   | 1.31E-10 | 0.002667 |
| 22Feb2011 | 7384  | 578.61  | -9.93287 | 3 K.MSENKN chrX@1384    | 5.41E-10 | 0.008901 |
| 22Feb2011 | 9385  | 583.28  | -12.9978 | 3 K.MSENK+ chrX@1384    | 6.28E-11 | 0.001702 |
| 22Feb2011 | 7401  | 462.22  | 7.146216 | 3 K.TKEEAGY chr1@7954   | 4.01E-10 | 0.008809 |
| 22Feb2011 | 2693  | 443.26  | -4.00227 | 2 K.IGGVQGV chr2@1329   | 1.15E-10 | 0.002321 |
| 22Feb2011 | 15665 | 759.72  | 29.32379 | 3 K.LEVM+15 Splice@chr  | 2.90E-10 | 0.00472  |
| 22Feb2011 | 23478 | 799.44  | 16.23122 | 4 R.GDLPHSL Splice@chr  | 2.18E-12 | 0        |
| 22Feb2011 | 16659 | 697.36  | -2.45419 | 2 I.M+15.995 chr5@8163  | 3.92E-10 | 0.007697 |
| 22Feb2011 | 25269 | 958.01  | 3.542639 | 2 G.LNQEHK\ chr5@1169   | 1.63E-10 | 0.003731 |
| 22Feb2011 | 10477 | 690.65  | 4.159641 | 4 _RQFVLILK chr5@3327   | 2.82E-10 | 0.005602 |
| 22Feb2011 | 22627 | 768.08  | 0.239744 | 3 R.STNATEP chrX@1356   | 4.63E-10 | 0.009011 |
| 22Feb2011 | 8934  | 532.32  | -12.8186 | 2 K.LLVFART\ chr5@1206  | 1.82E-10 | 0.004999 |
| 22Feb2011 | 11015 | 750.37  | 1.498673 | 5 S.HLPRPGH Splice@chr  | 2.85E-10 | 0.005994 |
| 22Feb2011 | 10399 | 750.37  | 1.498673 | 5 S.HLPRPGH Splice@chr  | 1.22E-10 | 0.002761 |
| 22Feb2011 | 22798 | 909.14  | -6.36246 | 3 K.NSNIKSG chr5@1683   | 2.52E-10 | 0.006728 |
| 22Feb2011 | 2052  | 448.23  | 27.84191 | 2 _QAEGYA1 Splice@chr   | 3.15E-10 | 0.006899 |
| 22Feb2011 | 20371 | 870.45  | 17.33979 | 2 K.IFRVCGG chr4@2521   | 3.82E-10 | 0.006958 |
| 22Feb2011 | 10307 | 573.33  | -0.63987 | 2 _SDIELERK chr2@5861   | 4.63E-10 | 0.006846 |
| 22Feb2011 | 15999 | 670.38  | 24.43756 | 2 K.K+14.016 chr4@8629  | 2.58E-10 | 0.005236 |
| 22Feb2011 | 26093 | 918.01  | -24.9384 | 2 P.IKIEILESA chr1@2569 | 2.67E-10 | 0.005348 |
| 22Feb2011 | 25684 | 918.01  | -24.9384 | 2 P.IKIEILESA chr1@2569 | 1.14E-10 | 0.002373 |
| 22Feb2011 | 26989 | 918.01  | -24.9384 | 2 P.IKIEILESA chr1@2569 | 1.91E-10 | 0.00441  |
| 22Feb2011 | 25201 | 918.01  | -24.9384 | 2 P.IKIEILESA chr1@2569 | 5.07E-10 | 0.009211 |
| 22Feb2011 | 26362 | 918.01  | -24.9384 | 2 P.IKIEILESA chr1@2569 | 2.65E-10 | 0.005488 |
| 22Feb2011 | 26404 | 918.01  | -24.9384 | 2 P.IKIEILESA chr1@2569 | 2.04E-10 | 0.003993 |
| 22Feb2011 | 27379 | 918.01  | -24.9384 | 2 P.IKIEILESA chr1@2569 | 2.98E-10 | 0.006552 |
| 22Feb2011 | 7790  | 545.33  | 9.419056 | 2 K.KLPRLGYI chrX@1111  | 3.97E-11 | 0.001179 |
| 22Feb2011 | 23922 | 914     | -12.4873 | 4 I.MKINK+1 chr1@1197   | 3.52E-10 | 0.00749  |
| 22Feb2011 | 20057 | 803.94  | -12.8151 | 2 K.FELEKWC chr4@9945   | 8.30E-12 | 0        |
| 22Feb2011 | 19766 | 803.94  | -12.8151 | 2 K.FELEKWC chr4@9945   | 2.61E-12 | 1.57E-04 |
| 22Feb2011 | 1492  | 555.78  | -18.7028 | 2 R.SIRFQTA chr1@1102   | 4.11E-10 | 0.008048 |
| 22Feb2011 | 18178 | 856.9   | -15.8747 | 2 R.FTYRSTCI Splice@chr | 2.68E-10 | 0.005873 |
| 22Feb2011 | 24058 | 764.43  | 2.819854 | 4 _PYHCRLP chr3@2586    | 1.47E-10 | 0.00316  |
| 22Feb2011 | 23587 | 788.41  | -1.27844 | 2 K.CVLCPALi chr4@1491  | 4.15E-10 | 0.006827 |
| 22Feb2011 | 7330  | 496.29  | -4.74709 | 2 R.IFKLNNN Splice@chr  | 3.80E-10 | 0.007129 |
| 22Feb2011 | 26291 | 1085.55 | 2.70132  | 3 K.FPAKILGL chr4@1582  | 3.71E-11 | 9.73E-04 |
| 22Feb2011 | 18475 | 888.45  | 7.330102 | 2 R.QTSAASR chr2@1476   | 3.69E-10 | 0.008471 |
| 22Feb2011 | 25243 | 856.45  | -21.1026 | 3 _K+14.016 chr3@5261   | 5.78E-10 | 0.009624 |
| 22Feb2011 | 6083  | 518.28  | 6.320938 | 2 K.FVNWQN chr2@2974    | 3.46E-10 | 0.006497 |
| 22Feb2011 | 25001 | 532.26  | -18.967  | 3 _SSSFLASF Splice@chr  | 4.70E-10 | 0.009544 |
| 22Feb2011 | 1031  | 553.28  | 2.983953 | 2 R.QTK+14.( Splice@chr | 3.08E-10 | 0.005037 |
| 22Feb2011 | 21326 | 996.47  | -26.8833 | 3 K.SGDAGIV Splice@chr  | 1.48E-10 | 0.003957 |
| 22Feb2011 | 24507 | 897.46  | 15.64379 | 3 K.LSKIDLSP Splice@chr | 2.30E-10 | 0.004869 |
| 22Feb2011 | 24468 | 897.46  | 15.64379 | 3 K.LSKIDLSP Splice@chr | 1.48E-10 | 0.003578 |
| 22Feb2011 | 718   | 471.26  | 17.28341 | 2 K.YILSGMT Splice@chr  | 2.77E-10 | 0.006527 |

|           |       |         |          |                         |          |          |
|-----------|-------|---------|----------|-------------------------|----------|----------|
| 22Feb2011 | 23884 | 1072.49 | -18.4349 | 2 K.LAFDDAI/ Splice@chr | 5.89E-11 | 0.001447 |
| 22Feb2011 | 23540 | 1072.49 | -18.4349 | 2 K.LAFDDAI/ Splice@chr | 4.57E-11 | 0.001203 |
| 22Feb2011 | 24457 | 1072.48 | -27.7811 | 2 K.LAFDDAI/ Splice@chr | 1.98E-10 | 0.004542 |
| 22Feb2011 | 7510  | 474.78  | -7.40756 | 2 R.IYIPAMLk chr2@2768  | 4.98E-11 | 7.77E-04 |
| 22Feb2011 | 7117  | 488.79  | -11.1363 | 2 _KVFEVINI chr1@6583   | 5.23E-10 | 0.009906 |
| 22Feb2011 | 20028 | 544.1   | -9.17049 | 5 K.KNIDNYK chr5@1005   | 4.08E-10 | 0.007998 |
| 22Feb2011 | 19926 | 544.1   | -9.17049 | 5 K.KNIDNYK chr5@1005   | 5.09E-10 | 0.009886 |
| 22Feb2011 | 23044 | 821.44  | -17.6558 | 3 K.TVVQLQK+ chr5@1524  | 2.31E-10 | 0.004565 |
| 22Feb2011 | 14825 | 762.39  | -8.5268  | 3 R.DQFM+1 chr4@1428    | 2.26E-10 | 0.00302  |
| 22Feb2011 | 21908 | 1077.53 | 24.19396 | 2 K.NWCWW chr5@9628     | 2.27E-10 | 0.004892 |
| 22Feb2011 | 2593  | 446.24  | -29.0918 | 2 _LSGSSSKF Splice@chr  | 5.35E-10 | 0.008901 |
| 22Feb2011 | 21426 | 797.42  | -0.65048 | 2 K.YRKHFGC chr5@9631   | 2.87E-12 | 1.42E-04 |
| 22Feb2011 | 21390 | 690.34  | -26.0925 | 2 R.MTNSIGC chr5@1603   | 2.58E-10 | 0.007571 |
| 22Feb2011 | 12343 | 562.79  | 27.70539 | 2 K.NYVELAN chr4@1278   | 3.57E-10 | 0.006727 |
| 22Feb2011 | 19676 | 859.44  | 13.87107 | 3 K.SYKNGM- chr5@1287   | 3.69E-10 | 0.007877 |
| 22Feb2011 | 5966  | 543.25  | 15.1584  | 3 R.YLEGDCC chr5@7278   | 2.73E-10 | 0.004578 |
| 22Feb2011 | 23497 | 782.42  | -14.825  | 4 K.KSTKEKKI chrX@7244  | 2.65E-10 | 0.004847 |
| 22Feb2011 | 1516  | 704.32  | -10.7609 | 2 S.RAVMNC Splice@chr   | 5.26E-16 | 0        |
| 22Feb2011 | 1628  | 704.32  | -10.7609 | 2 S.RAVMNC Splice@chr   | 5.48E-15 | 0        |
| 22Feb2011 | 1444  | 704.32  | -10.7609 | 2 S.RAVMNC Splice@chr   | 2.91E-15 | 0        |
| 22Feb2011 | 1400  | 704.32  | -10.7609 | 2 S.RAVMNC Splice@chr   | 3.13E-14 | 0        |
| 22Feb2011 | 1481  | 704.32  | -10.7609 | 2 S.RAVMNC Splice@chr   | 1.53E-15 | 0        |
| 22Feb2011 | 1553  | 704.32  | -10.7609 | 2 S.RAVMNC Splice@chr   | 1.98E-15 | 0        |
| 22Feb2011 | 1587  | 704.32  | -10.7609 | 2 S.RAVMNC Splice@chr   | 2.57E-15 | 0        |
| 22Feb2011 | 1357  | 704.32  | -10.7609 | 2 S.RAVMNC Splice@chr   | 2.63E-14 | 0        |
| 22Feb2011 | 1813  | 704.32  | -10.7609 | 2 S.RAVMNC Splice@chr   | 2.16E-14 | 0        |
| 22Feb2011 | 1771  | 704.32  | -10.7609 | 2 S.RAVMNC Splice@chr   | 4.62E-15 | 0        |
| 22Feb2011 | 5774  | 478.78  | 17.07502 | 2 _ILVSSGHS chrX@3166   | 4.38E-10 | 0.009171 |
| 22Feb2011 | 5829  | 478.78  | 17.07502 | 2 _ILVSSGHS chrX@3166   | 1.61E-10 | 0.003485 |
| 22Feb2011 | 6436  | 478.78  | 17.07502 | 2 _ILVSSGHS chrX@3166   | 3.08E-10 | 0.00596  |
| 22Feb2011 | 6217  | 478.78  | 17.07502 | 2 _ILVSSGHS chrX@3166   | 3.26E-10 | 0.007093 |
| 22Feb2011 | 5825  | 478.78  | 17.07502 | 2 _ILVSSGHS chrX@3166   | 1.88E-10 | 0.003734 |
| 22Feb2011 | 936   | 403.23  | -11.1644 | 2 K.SLTGGLI Splice@chr  | 5.67E-10 | 0.009688 |
| 22Feb2011 | 27753 | 1141.6  | -12.3923 | 2 _YWLGSKF chr2@1477    | 5.06E-10 | 0.009463 |
| 22Feb2011 | 23586 | 632.66  | -29.8073 | 3 _KQLACSH chr4@2051    | 6.01E-10 | 0.009884 |
| 22Feb2011 | 4859  | 402.73  | -7.14084 | 2 R.ASIASSR chr2@9330   | 4.29E-10 | 0.00834  |
| 22Feb2011 | 4238  | 402.73  | -7.14084 | 2 R.ASIASSR chr2@9330   | 4.32E-10 | 0.009363 |
| 22Feb2011 | 26416 | 670.83  | -11.8456 | 2 R.SK+14.01 chr4@3531  | 3.31E-10 | 0.007343 |
| 22Feb2011 | 26392 | 670.82  | -26.7894 | 2 R.SK+14.01 chr4@3531  | 9.37E-11 | 0.002168 |
| 22Feb2011 | 12635 | 599.01  | 22.70688 | 3 K.GFSLPNE Splice@chr  | 1.80E-10 | 0.004063 |
| 22Feb2011 | 26100 | 1083.24 | 12.73179 | 3 K.ICCHK+14 chr1@3885  | 4.68E-10 | 0.009833 |
| 22Feb2011 | 10234 | 483.24  | 1.096924 | 3 R.DIETERDI chrX@1614  | 1.87E-10 | 0.004224 |
| 22Feb2011 | 10518 | 483.24  | 1.096924 | 3 R.DIETERDI chrX@1614  | 5.55E-12 | 0        |
| 22Feb2011 | 47    | 500.28  | 4.645456 | 2 K.QELEQKP chr2@9837   | 4.03E-10 | 0.006762 |
| 22Feb2011 | 9461  | 486.29  | 0.31697  | 2 K.VVK+14.( Splice@chr | 1.25E-10 | 0.004036 |
| 22Feb2011 | 19857 | 840.73  | -15.0312 | 4 K.IKQASLDI chr4@6130  | 4.19E-10 | 0.008166 |
| 22Feb2011 | 21597 | 978.55  | -28.212  | 4 _KKSCLIQK chr5@2028   | 1.22E-10 | 0.002675 |

|           |       |        |          |                         |          |          |
|-----------|-------|--------|----------|-------------------------|----------|----------|
| 22Feb2011 | 17328 | 682.85 | -15.5754 | 2 _SVTSASN chr4@1330    | 3.52E-10 | 0.007417 |
| 22Feb2011 | 421   | 515.29 | 4.575762 | 2 K.RDPPPPP chr1@1125   | 1.94E-10 | 0.003563 |
| 22Feb2011 | 924   | 515.29 | 4.575762 | 2 K.RDPPPPP chr1@1125   | 8.80E-11 | 0.002213 |
| 22Feb2011 | 520   | 515.29 | 4.575762 | 2 K.RDPPPPP chr1@1125   | 3.69E-10 | 0.007635 |
| 22Feb2011 | 1055  | 515.29 | 4.575762 | 2 K.RDPPPPP chr1@1125   | 3.37E-10 | 0.00718  |
| 22Feb2011 | 459   | 515.29 | 4.575762 | 2 K.RDPPPPP chr1@1125   | 1.91E-10 | 0.003482 |
| 22Feb2011 | 1174  | 515.29 | 4.575762 | 2 K.RDPPPPP chr1@1125   | 3.34E-10 | 0.00718  |
| 22Feb2011 | 880   | 515.29 | 4.575762 | 2 K.RDPPPPP chr1@1125   | 3.98E-10 | 0.008237 |
| 22Feb2011 | 2979  | 515.3  | 24.05842 | 2 K.RDPPPPP chr1@1125   | 4.15E-10 | 0.008666 |
| 22Feb2011 | 1871  | 515.29 | 4.575762 | 2 K.RDPPPPP chr1@1125   | 1.72E-10 | 0.004073 |
| 22Feb2011 | 1826  | 515.29 | 4.575762 | 2 K.RDPPPPP chr1@1125   | 3.56E-10 | 0.007828 |
| 22Feb2011 | 1951  | 515.29 | 4.575762 | 2 K.RDPPPPP chr1@1125   | 2.58E-10 | 0.006111 |
| 22Feb2011 | 1912  | 515.29 | 4.575762 | 2 K.RDPPPPP chr1@1125   | 6.99E-11 | 0.001981 |
| 22Feb2011 | 1785  | 515.29 | 4.575762 | 2 K.RDPPPPP chr1@1125   | 2.37E-10 | 0.005966 |
| 22Feb2011 | 1703  | 515.29 | 4.575762 | 2 K.RDPPPPP chr1@1125   | 3.05E-10 | 0.007088 |
| 22Feb2011 | 3906  | 515.29 | 4.575762 | 2 K.RDPPPPP chr1@1125   | 4.06E-10 | 0.009462 |
| 22Feb2011 | 2051  | 515.28 | -14.7881 | 2 K.RDPPPPP chr1@1125   | 4.11E-11 | 7.02E-04 |
| 22Feb2011 | 2012  | 515.29 | 4.575762 | 2 K.RDPPPPP chr1@1125   | 7.21E-11 | 0.001443 |
| 22Feb2011 | 3819  | 515.29 | 4.575762 | 2 K.RDPPPPP chr1@1125   | 8.46E-13 | 0        |
| 22Feb2011 | 2211  | 515.29 | 4.575762 | 2 K.RDPPPPP chr1@1125   | 2.29E-10 | 0.00449  |
| 22Feb2011 | 2255  | 515.29 | 4.575762 | 2 K.RDPPPPP chr1@1125   | 1.22E-11 | 2.21E-04 |
| 22Feb2011 | 1967  | 515.29 | 4.575762 | 2 K.RDPPPPP chr1@1125   | 1.18E-11 | 2.21E-04 |
| 22Feb2011 | 9349  | 460.27 | 19.00482 | 2 K.VLMSSAF chr5@1018   | 3.53E-10 | 0.007828 |
| 22Feb2011 | 22906 | 890.13 | -10.5257 | 3 R.NSVLIDW chr3@6410   | 2.86E-10 | 0.005636 |
| 22Feb2011 | 20044 | 844.41 | 2.755806 | 1 K.FMMRMI chr1@1304    | 4.21E-10 | 0.008794 |
| 22Feb2011 | 18099 | 846.79 | -9.21567 | 3 K.FQQEM+ chr4@1675    | 3.97E-10 | 0.008644 |
| 22Feb2011 | 21609 | 756.91 | 7.636928 | 2 K.KNFQRN chr3@1085    | 3.71E-10 | 0.007065 |
| 22Feb2011 | 20494 | 714.41 | -3.42219 | 4 K.TLLEALD Splice@chr  | 1.77E-10 | 0.002948 |
| 22Feb2011 | 20445 | 714.41 | -3.42219 | 4 K.TLLEALD Splice@chr  | 5.16E-10 | 0.008596 |
| 22Feb2011 | 23535 | 848.94 | 2.846214 | 2 K.LLEM+15 chr5@9177   | 2.45E-10 | 0.005009 |
| 22Feb2011 | 24894 | 774.39 | -18.6749 | 2 K.STK+14.0 chr3@4255  | 1.95E-10 | 0.002602 |
| 22Feb2011 | 11410 | 822.4  | -23.2333 | 2 R.K+14.016 Splice@chr | 1.36E-10 | 0.002739 |
| 22Feb2011 | 24898 | 607.36 | 28.28614 | 4 K.KIILTTINT chrX@8579 | 1.34E-10 | 0.00493  |
| 22Feb2011 | 23090 | 799.08 | 8.08555  | 3 E.LYDQVSG Splice@chr  | 1.49E-10 | 0.003252 |
| 22Feb2011 | 16724 | 985.76 | -0.3099  | 4 K.NVLTNFF Splice@chr  | 4.89E-10 | 0.007246 |
| 22Feb2011 | 16775 | 985.76 | -0.3099  | 4 K.NVLTNFF Splice@chr  | 1.58E-10 | 0.002094 |
| 22Feb2011 | 18236 | 985.76 | -0.3099  | 4 K.NVLTNFF Splice@chr  | 3.88E-11 | 7.88E-04 |
| 22Feb2011 | 18435 | 985.76 | -0.3099  | 4 K.NVLTNFF Splice@chr  | 3.11E-10 | 0.007963 |
| 22Feb2011 | 18377 | 985.76 | -0.3099  | 4 K.NVLTNFF Splice@chr  | 1.11E-11 | 4.56E-04 |
| 22Feb2011 | 18399 | 985.76 | -0.3099  | 4 K.NVLTNFF Splice@chr  | 4.01E-10 | 0.008227 |
| 22Feb2011 | 18338 | 985.76 | -0.3099  | 4 K.NVLTNFF Splice@chr  | 2.92E-10 | 0.005664 |
| 22Feb2011 | 16701 | 985.77 | 9.854852 | 4 K.NVLTNFF Splice@chr  | 1.50E-10 | 0.003574 |
| 22Feb2011 | 16756 | 985.76 | -0.3099  | 4 K.NVLTNFF Splice@chr  | 6.86E-12 | 1.17E-04 |
| 22Feb2011 | 17513 | 985.76 | -0.3099  | 4 K.NVLTNFF Splice@chr  | 6.70E-11 | 0.001994 |
| 22Feb2011 | 17832 | 985.76 | -0.3099  | 4 K.NVLTNFF Splice@chr  | 6.38E-11 | 0.001659 |
| 22Feb2011 | 18056 | 985.77 | 9.854852 | 4 K.NVLTNFF Splice@chr  | 4.03E-10 | 0.008    |
| 22Feb2011 | 18806 | 985.76 | -0.3099  | 4 K.NVLTNFF Splice@chr  | 1.99E-10 | 0.004671 |

|           |       |         |          |                         |          |          |
|-----------|-------|---------|----------|-------------------------|----------|----------|
| 22Feb2011 | 18729 | 985.77  | 9.854852 | 4 K.NVLTNFF Splice@chr  | 1.69E-10 | 0.004319 |
| 22Feb2011 | 1037  | 573.98  | -15.4102 | 3 R.K+14.016 chr5@9384  | 2.18E-10 | 0.005156 |
| 22Feb2011 | 1115  | 420.23  | 21.51834 | 3 K.LDNGGG chr2@1165    | 7.75E-11 | 0.002442 |
| 22Feb2011 | 1070  | 420.23  | 21.51834 | 3 K.LDNGGG chr2@1165    | 2.61E-11 | 9.53E-04 |
| 22Feb2011 | 18712 | 674.69  | -20.173  | 3 _LENRKM+ Splice@chr   | 5.67E-10 | 0.009688 |
| 22Feb2011 | 17146 | 674.69  | -20.173  | 3 _LENRKM+ Splice@chr   | 4.48E-10 | 0.009838 |
| 22Feb2011 | 731   | 623.29  | -21.348  | 2 K.NFDFSKE chrX@1477   | 2.52E-10 | 0.005308 |
| 22Feb2011 | 856   | 400.56  | -27.394  | 3 R.QNK+14.1 chr2@3315  | 4.87E-10 | 0.008392 |
| 22Feb2011 | 23942 | 1048.28 | 10.9804  | 3 _RSCKIRKY chr5@1145   | 3.32E-10 | 0.00696  |
| 22Feb2011 | 21254 | 1064.19 | 2.546568 | 3 _LEMNRNI Splice@chr   | 4.04E-10 | 0.006762 |
| 22Feb2011 | 3343  | 592.28  | -3.5097  | 2 K.KCETTSCL chr2@1192  | 3.43E-10 | 0.006548 |
| 22Feb2011 | 3258  | 531.32  | 2.018062 | 2 K.QTWKTKI chrX@4811   | 4.69E-10 | 0.008933 |
| 22Feb2011 | 27073 | 644.37  | -4.93317 | 1 R.GGGGGV chr4@6487    | 3.06E-10 | 0.006636 |
| 22Feb2011 | 14405 | 734.71  | -13.5317 | 3 R.WWNWV chr5@9908     | 1.51E-10 | 0.002514 |
| 22Feb2011 | 2763  | 474.24  | -6.06596 | 2 V.IEGHATY chr4@7600   | 2.46E-10 | 0.006535 |
| 22Feb2011 | 23056 | 815.94  | 28.98559 | 4 R.KAFKMKI chrX@1838   | 4.14E-10 | 0.008666 |
| 22Feb2011 | 26972 | 703.04  | -3.70946 | 3 K.PGWVAT chr5@7971    | 1.32E-10 | 0.002746 |
| 22Feb2011 | 20537 | 797.03  | -15.0281 | 3 R.WCYLESS chr5@7231   | 1.45E-10 | 0.003344 |
| 22Feb2011 | 20906 | 675.39  | 11.76583 | 4 _NCLKFRLI Splice@chr  | 3.18E-10 | 0.007295 |
| 22Feb2011 | 19725 | 527.3   | 17.86001 | 2 R.NILNGSFI Splice@chr | 4.07E-10 | 0.009462 |
| 22Feb2011 | 20130 | 527.3   | 17.86001 | 2 R.NILNGSFI Splice@chr | 2.16E-10 | 0.005055 |
| 22Feb2011 | 4145  | 438.26  | 19.6125  | 2 R.IGSTSAAI Splice@chr | 7.17E-12 | 1.10E-04 |
| 22Feb2011 | 5165  | 438.26  | 19.6125  | 2 R.IGSTSAAI chrX@2308  | 3.83E-10 | 0.007867 |
| 22Feb2011 | 3176  | 438.26  | 19.6125  | 2 R.IGSTSAAI chrX@2308  | 5.60E-11 | 0.002245 |
| 22Feb2011 | 3438  | 438.26  | 19.6125  | 2 R.IGSTSAAI chrX@2308  | 2.64E-11 | 6.29E-04 |
| 22Feb2011 | 7155  | 424.22  | -25.9148 | 2 R.NIANMG chr5@1878    | 1.03E-10 | 0.00229  |
| 22Feb2011 | 952   | 474.25  | -26.9808 | 2 _LCVKSSPI chr4@6165   | 4.44E-10 | 0.009858 |
| 22Feb2011 | 2793  | 447.74  | 16.66863 | 2 _LIYDNEK. Splice@chr  | 4.64E-10 | 0.009068 |
| 22Feb2011 | 2634  | 447.74  | 16.66863 | 2 _LIYDNEK. Splice@chr  | 4.64E-10 | 0.009068 |
| 22Feb2011 | 2991  | 447.74  | 16.66863 | 2 _LIYDNEK. Splice@chr  | 4.12E-10 | 0.007636 |
| 22Feb2011 | 22412 | 972.14  | 13.32427 | 3 _SIRPNLW Splice@chr   | 4.03E-11 | 0.001054 |
| 22Feb2011 | 22457 | 966.81  | 15.08309 | 3 _SIRPNLW Splice@chr   | 2.85E-10 | 0.006684 |
| 22Feb2011 | 24018 | 966.81  | 15.08309 | 3 _SIRPNLW Splice@chr   | 3.10E-10 | 0.008281 |
| 22Feb2011 | 20729 | 874.98  | 9.888865 | 2 _GSPRSRH Splice@chr   | 3.87E-10 | 0.007245 |
| 22Feb2011 | 22366 | 926.81  | 6.44199  | 3 R.M+15.99 chr5@1182   | 3.92E-10 | 0.007907 |
| 22Feb2011 | 21505 | 926.81  | 6.44199  | 3 R.M+15.99 chr5@1182   | 4.02E-11 | 8.12E-04 |
| 22Feb2011 | 22041 | 926.81  | 6.44199  | 3 R.M+15.99 chr5@1182   | 1.69E-10 | 0.003482 |
| 22Feb2011 | 22884 | 926.81  | 6.44199  | 3 R.M+15.99 chr5@1182   | 5.22E-11 | 0.001624 |
| 22Feb2011 | 6796  | 617.82  | -24.6074 | 2 I.NLQEDLKI chr3@2710  | 4.11E-10 | 0.006827 |
| 22Feb2011 | 25482 | 760.73  | 6.350541 | 3 R.RFDKVVN Splice@chr  | 3.10E-10 | 0.006274 |
| 22Feb2011 | 26563 | 760.73  | 6.350541 | 3 R.RFDKVVN Splice@chr  | 2.52E-10 | 0.004084 |
| 22Feb2011 | 25783 | 760.4   | 12.32412 | 3 R.RFDKVVN Splice@chr  | 2.86E-10 | 0.00535  |
| 22Feb2011 | 24901 | 760.4   | 12.32412 | 3 R.RFDKVVN Splice@chr  | 4.35E-10 | 0.009597 |
| 22Feb2011 | 26142 | 760.4   | 12.32412 | 3 R.RFDKVVN Splice@chr  | 2.92E-10 | 0.006261 |
| 22Feb2011 | 26323 | 760.73  | 6.350541 | 3 R.RFDKVVN Splice@chr  | 3.58E-10 | 0.007822 |
| 22Feb2011 | 24369 | 760.73  | 6.350541 | 3 R.RFDKVVN Splice@chr  | 7.47E-11 | 0.001981 |
| 22Feb2011 | 26101 | 760.72  | -6.83091 | 3 R.RFDKVVN Splice@chr  | 2.98E-10 | 0.008043 |

|           |       |         |          |                         |          |          |
|-----------|-------|---------|----------|-------------------------|----------|----------|
| 22Feb2011 | 25651 | 760.73  | 6.350541 | 3 R.RFDKVVN Splice@chr  | 4.81E-11 | 8.23E-04 |
| 22Feb2011 | 26738 | 760.4   | 12.32412 | 3 R.RFDKVVN Splice@chr  | 4.73E-10 | 0.009317 |
| 22Feb2011 | 25870 | 840.1   | -28.9844 | 3 _TVLIDKISI Splice@chr | 4.23E-10 | 0.009964 |
| 22Feb2011 | 14959 | 939.93  | -25.5916 | 2 R.RRLEFSPI Splice@chr | 5.47E-10 | 0.009588 |
| 22Feb2011 | 27638 | 1182.23 | 7.854083 | 3 Q.EM+15.9 Splice@chr  | 1.82E-11 | 0.001087 |
| 22Feb2011 | 1447  | 557.31  | -0.65829 | 2 K.KNNNGA chr4@1649    | 2.17E-10 | 0.004764 |
| 22Feb2011 | 1397  | 557.31  | -0.65829 | 2 K.KNNNGA chr4@1649    | 1.15E-10 | 0.002509 |
| 22Feb2011 | 2684  | 557.31  | -0.65829 | 2 K.KNNNGA chr4@1649    | 2.70E-10 | 0.005623 |
| 22Feb2011 | 25139 | 765.41  | -26.2795 | 3 _KMVTTDI chr5@6356    | 4.15E-10 | 0.009003 |
| 22Feb2011 | 14150 | 751.39  | -27.2477 | 4 _PQGYQYI Splice@chr   | 5.10E-10 | 0.009721 |
| 22Feb2011 | 2227  | 443.22  | -29.3519 | 3 K.LSKFAEF/ chr5@1309  | 4.43E-10 | 0.00892  |
| 22Feb2011 | 27003 | 1054.05 | 8.728352 | 2 _RK+14.01 chrX@7630   | 4.24E-10 | 0.008232 |
| 22Feb2011 | 20115 | 737.87  | -18.6893 | 2 K.KPMEILYI chr1@8387  | 8.85E-12 | 4.13E-04 |
| 22Feb2011 | 21550 | 737.87  | -18.6893 | 2 K.KPMEILYI chr1@8387  | 5.99E-13 | 0        |
| 22Feb2011 | 20843 | 737.87  | -18.6893 | 2 K.KPMEILYI chr1@8387  | 1.42E-11 | 2.51E-04 |
| 22Feb2011 | 21276 | 737.88  | -5.09604 | 2 K.KPMEILYI chr1@8387  | 6.76E-11 | 0.002207 |
| 22Feb2011 | 21936 | 737.87  | -18.6893 | 2 K.KPMEILYI chr1@8387  | 4.30E-12 | 5.52E-04 |
| 22Feb2011 | 22615 | 737.88  | -5.09604 | 2 K.KPMEILYI chr1@8387  | 3.56E-11 | 0.001356 |
| 22Feb2011 | 21580 | 737.87  | -18.6893 | 2 K.KPMEILYI chr1@8387  | 3.95E-12 | 3.41E-04 |
| 22Feb2011 | 21895 | 737.87  | -18.6893 | 2 K.KPMEILYI chr1@8387  | 8.41E-12 | 4.05E-04 |
| 22Feb2011 | 22674 | 737.87  | -18.6893 | 2 K.KPMEILYI chr1@8387  | 4.69E-11 | 6.97E-04 |
| 22Feb2011 | 22277 | 737.87  | -18.6893 | 2 K.KPMEILYI chr1@8387  | 4.72E-10 | 0.009317 |
| 22Feb2011 | 23064 | 737.88  | -5.09604 | 2 K.KPMEILYI chr1@8387  | 7.76E-12 | 5.86E-04 |
| 22Feb2011 | 12215 | 562.79  | 5.323662 | 2 R.ESPQIM+ Splice@chr  | 2.62E-10 | 0.00539  |
| 22Feb2011 | 25084 | 1054.55 | -22.9411 | 2 F.FLEFCK+1 chr4@2874  | 3.13E-10 | 0.008344 |
| 22Feb2011 | 664   | 400.24  | 6.785262 | 3 K.K+14.016 chrX@1546  | 1.53E-10 | 0.003957 |
| 22Feb2011 | 22453 | 645.85  | -25.5552 | 2 R.FFKTNIVf chr4@1538  | 4.55E-10 | 0.008954 |
| 22Feb2011 | 2020  | 474.25  | -27.0454 | 2 K.MGGAQI chr5@1795    | 2.54E-10 | 0.003435 |
| 22Feb2011 | 3108  | 474.25  | -27.0454 | 2 K.MGGAQI chr5@1795    | 4.53E-10 | 0.008401 |
| 22Feb2011 | 2744  | 474.25  | -27.0454 | 2 K.MGGAQI chr5@1795    | 2.37E-10 | 0.004565 |
| 22Feb2011 | 3090  | 474.25  | -27.0454 | 2 K.MGGAQI chr5@1795    | 2.49E-10 | 0.006409 |
| 22Feb2011 | 2978  | 474.25  | -27.0454 | 2 K.MGGAQI chr5@1795    | 3.36E-10 | 0.008649 |
| 22Feb2011 | 12160 | 748.38  | 13.77165 | 2 R.QWASWf Splice@chr   | 1.11E-10 | 0.002269 |
| 22Feb2011 | 17077 | 587.58  | -18.6063 | 4 R.KK+14.01 Splice@chr | 1.34E-10 | 0.00493  |
| 22Feb2011 | 16308 | 587.58  | -18.6063 | 4 R.KK+14.01 Splice@chr | 9.78E-11 | 0.002343 |
| 22Feb2011 | 16388 | 587.58  | -18.6063 | 4 R.KK+14.01 Splice@chr | 5.30E-11 | 0.001889 |
| 22Feb2011 | 19962 | 550.58  | -14.4154 | 4 R.LLSFHACI chr2@1175  | 1.28E-10 | 0.003178 |
| 22Feb2011 | 8051  | 479.28  | 27.69343 | 2 R.TPSDVITf chr1@1375  | 9.73E-11 | 0.001959 |
| 22Feb2011 | 15383 | 642.36  | -22.3636 | 4 K.K+14.016 chr5@2061  | 9.88E-11 | 0.002632 |
| 22Feb2011 | 4015  | 407.74  | -8.02827 | 2 _LILGEGGf chr5@1316   | 3.80E-10 | 0.006958 |
| 22Feb2011 | 2114  | 515.27  | -9.85577 | 3 _IQERCVD chr4@8772    | 7.29E-12 | 1.10E-04 |
| 22Feb2011 | 17145 | 608.31  | -3.59354 | 4 K.MMKKFT chr4@1721    | 1.98E-10 | 0.004489 |
| 22Feb2011 | 16996 | 608.31  | -3.59354 | 4 K.MMKKFT chr4@1721    | 6.87E-12 | 4.05E-04 |
| 22Feb2011 | 16859 | 608.31  | -3.59354 | 4 K.MMKKFT chr4@1721    | 2.56E-10 | 0.005066 |
| 22Feb2011 | 16475 | 608.31  | -3.59354 | 4 K.MMKKFT chr4@1721    | 3.13E-10 | 0.007447 |
| 22Feb2011 | 17434 | 608.31  | -3.59354 | 4 K.MMKKFT chr4@1721    | 2.62E-10 | 0.005986 |
| 22Feb2011 | 17576 | 608.06  | -2.21195 | 4 K.MMKKFT chr4@1721    | 2.45E-10 | 0.005544 |

|           |       |         |          |                         |          |          |
|-----------|-------|---------|----------|-------------------------|----------|----------|
| 22Feb2011 | 27631 | 1050.53 | -16.0506 | 2 R.NVPNFQI chr2@3039   | 8.06E-11 | 0.001746 |
| 22Feb2011 | 23334 | 472.99  | -16.229  | 4 R.RSSSDKLI chr4@1310  | 5.22E-11 | 0.00136  |
| 22Feb2011 | 17726 | 1054.16 | -19.9224 | 3 I.SRSAALFC Splice@chr | 8.54E-12 | 4.13E-04 |
| 22Feb2011 | 20366 | 1054.16 | -19.9224 | 3 I.SRSAALFC Splice@chr | 3.59E-12 | 3.55E-04 |
| 22Feb2011 | 18799 | 1054.17 | -10.3377 | 3 I.SRSAALFC Splice@chr | 7.95E-12 | 2.28E-04 |
| 22Feb2011 | 20285 | 1054.16 | -19.9224 | 3 I.SRSAALFC Splice@chr | 2.86E-12 | 1.10E-04 |
| 22Feb2011 | 18914 | 1053.83 | -15.7684 | 3 I.SRSAALFC Splice@chr | 1.16E-11 | 3.25E-04 |
| 22Feb2011 | 18736 | 1053.83 | -15.7684 | 3 I.SRSAALFC Splice@chr | 1.57E-13 | 0        |
| 22Feb2011 | 18786 | 1053.83 | -15.7684 | 3 I.SRSAALFC Splice@chr | 1.94E-15 | 0        |
| 22Feb2011 | 20090 | 1054.15 | -29.3525 | 3 I.SRSAALFC Splice@chr | 5.96E-14 | 0        |
| 22Feb2011 | 18987 | 1054.16 | -19.9224 | 3 I.SRSAALFC Splice@chr | 2.91E-13 | 0        |
| 22Feb2011 | 18997 | 1053.83 | -15.7684 | 3 I.SRSAALFC Splice@chr | 4.91E-14 | 0        |
| 22Feb2011 | 20716 | 1054.15 | -29.3525 | 3 I.SRSAALFC Splice@chr | 7.99E-12 | 3.44E-04 |
| 22Feb2011 | 19577 | 1054.16 | -19.9224 | 3 I.SRSAALFC Splice@chr | 3.54E-11 | 0.001345 |
| 22Feb2011 | 18358 | 1054.16 | -19.9224 | 3 I.SRSAALFC Splice@chr | 1.82E-14 | 0        |
| 22Feb2011 | 18431 | 1053.83 | -15.7684 | 3 I.SRSAALFC Splice@chr | 2.77E-11 | 0.001158 |
| 22Feb2011 | 18332 | 1053.83 | -15.7684 | 3 I.SRSAALFC Splice@chr | 1.19E-14 | 0        |
| 22Feb2011 | 20705 | 1054.15 | -29.3525 | 3 I.SRSAALFC Splice@chr | 9.81E-12 | 5.55E-04 |
| 22Feb2011 | 17587 | 1054.16 | -19.9224 | 3 I.SRSAALFC Splice@chr | 2.58E-14 | 0        |
| 22Feb2011 | 17644 | 1054.16 | -19.9224 | 3 I.SRSAALFC Splice@chr | 4.66E-15 | 0        |
| 22Feb2011 | 17721 | 1054.16 | -19.9224 | 3 I.SRSAALFC Splice@chr | 9.38E-13 | 0        |
| 22Feb2011 | 19058 | 1053.83 | -15.7684 | 3 I.SRSAALFC Splice@chr | 6.58E-14 | 0        |
| 22Feb2011 | 19114 | 1053.83 | -15.7684 | 3 I.SRSAALFC Splice@chr | 2.20E-10 | 0.005156 |
| 22Feb2011 | 19660 | 1054.15 | -29.3525 | 3 I.SRSAALFC Splice@chr | 1.71E-13 | 0        |
| 22Feb2011 | 18572 | 1053.83 | -15.7684 | 3 I.SRSAALFC Splice@chr | 7.12E-14 | 0        |
| 22Feb2011 | 2428  | 672.31  | 17.69918 | 2 K.NWRFC5 chr5@1814    | 2.32E-10 | 0.004405 |
| 22Feb2011 | 3298  | 672.31  | 17.69918 | 2 K.NWRFC5 chr5@1814    | 4.95E-10 | 0.008692 |
| 22Feb2011 | 3069  | 660.56  | -18.6759 | 4 R.FINNCSG chrX@1482   | 7.02E-11 | 0.002265 |
| 22Feb2011 | 4246  | 660.56  | -18.6759 | 4 R.FINNCSG chrX@1482   | 3.73E-10 | 0.007593 |
| 22Feb2011 | 4550  | 660.31  | -17.4039 | 4 R.FINNCSG chrX@1482   | 1.59E-10 | 0.003714 |
| 22Feb2011 | 4406  | 660.31  | -17.4039 | 4 R.FINNCSG chrX@1482   | 3.81E-11 | 0.001356 |
| 22Feb2011 | 4339  | 660.31  | -17.4039 | 4 R.FINNCSG chrX@1482   | 7.74E-11 | 0.001687 |
| 22Feb2011 | 4733  | 660.31  | -17.4039 | 4 R.FINNCSG chrX@1482   | 1.80E-10 | 0.004007 |
| 22Feb2011 | 4790  | 660.31  | -17.4039 | 4 R.FINNCSG chrX@1482   | 4.13E-10 | 0.007709 |
| 22Feb2011 | 4447  | 660.31  | -17.4039 | 4 R.FINNCSG chrX@1482   | 6.52E-11 | 0.00175  |
| 22Feb2011 | 3997  | 660.31  | -17.4039 | 4 R.FINNCSG chrX@1482   | 3.74E-10 | 0.008811 |
| 22Feb2011 | 21487 | 873.12  | -21.5551 | 3 R.ENFYMLC chr3@4479   | 1.91E-10 | 0.004751 |
| 22Feb2011 | 27167 | 1042.55 | -11.72   | 3 R.NRNCSVC Splice@chr  | 4.36E-10 | 0.00999  |
| 22Feb2011 | 4290  | 603.33  | -27.5618 | 1 R.AGGGTLK chr2@8218   | 2.21E-10 | 0.005114 |
| 22Feb2011 | 17709 | 1179.49 | -26.6046 | 2 K.DLYANTV Splice@chr  | 2.52E-11 | 3.94E-04 |
| 22Feb2011 | 21220 | 875.48  | 10.58159 | 2 R.AWSVIGI Splice@chr  | 1.81E-10 | 0.004999 |
| 22Feb2011 | 19345 | 953.26  | 21.3665  | 4 K.NGM+15 chr3@6603    | 4.16E-10 | 0.008166 |
| 22Feb2011 | 19272 | 630.05  | 23.22478 | 4 K.K+14.016 chrX@1589  | 2.58E-10 | 0.005308 |
| 22Feb2011 | 25579 | 1047.9  | 5.230063 | 3 K.KMTENLI chr2@2506   | 3.02E-10 | 0.006774 |
| 22Feb2011 | 22757 | 580.08  | 20.55374 | 4 K.K+14.016 chr5@2059  | 1.67E-11 | 5.01E-04 |
| 22Feb2011 | 11607 | 715.36  | 25.26778 | 2 K.CFREME+1 chr4@5824  | 2.98E-10 | 0.005765 |
| 22Feb2011 | 6149  | 511.3   | -12.1999 | 2 K.NLFTAISK Splice@chr | 5.01E-10 | 0.009246 |

|           |       |         |          |                         |          |          |
|-----------|-------|---------|----------|-------------------------|----------|----------|
| 22Feb2011 | 4697  | 583.3   | -10.7962 | 2 R.LGPFFSTf chr1@8262  | 6.24E-12 | 4.53E-04 |
| 22Feb2011 | 20110 | 911.96  | 25.66223 | 2 K.GGK+14.1 chr4@4624  | 1.47E-10 | 0.003066 |
| 22Feb2011 | 3557  | 419.22  | -0.53384 | 3 K.FAGCALG chrX@1060   | 4.37E-10 | 0.00892  |
| 22Feb2011 | 26683 | 979.84  | -26.6873 | 3 K.LVFFFRFS chr1@1280  | 2.68E-10 | 0.005893 |
| 22Feb2011 | 10950 | 576.84  | -3.36585 | 4 R.NKTGEID chr1@9861   | 1.51E-10 | 0.002986 |
| 22Feb2011 | 26968 | 838.39  | -4.51904 | 2 K.TTWRIISG chr1@1007  | 2.39E-10 | 0.005169 |
| 22Feb2011 | 16442 | 580.31  | -14.1883 | 3 R.IILGHISIK chr1@1042 | 3.36E-10 | 0.007251 |
| 22Feb2011 | 8163  | 476.24  | -25.1521 | 4 K.LEMMKS chrX@7784    | 1.10E-10 | 0.003924 |
| 22Feb2011 | 16164 | 741.41  | 15.64348 | 3 K.IEVCHESI chr4@7149  | 1.52E-10 | 0.003574 |
| 22Feb2011 | 17619 | 741.41  | 15.64348 | 3 K.IEVCHESI chr4@7149  | 9.41E-11 | 0.001991 |
| 22Feb2011 | 15461 | 695.67  | 22.49345 | 3 K.FCK+14.0 chr1@1469  | 4.26E-10 | 0.009095 |
| 22Feb2011 | 26991 | 811.26  | -19.3456 | 4 K.KEKKIEKN chr1@1375  | 4.28E-10 | 0.008433 |
| 22Feb2011 | 23919 | 1048.27 | 29.8406  | 3 R.TWSETQI chr2@6368   | 4.66E-10 | 0.009011 |
| 22Feb2011 | 22840 | 1048.6  | 25.50896 | 3 R.TWSETQI chr2@6368   | 1.30E-10 | 0.003646 |
| 22Feb2011 | 25579 | 993.51  | 4.837728 | 3 R.DFDK+14 chr1@3640   | 4.16E-10 | 0.009285 |
| 22Feb2011 | 26300 | 698.4   | 21.67859 | 2 R.K+14.016 chr4@4482  | 3.80E-10 | 0.006298 |
| 22Feb2011 | 25979 | 698.4   | 21.67859 | 2 R.K+14.016 chr4@4482  | 4.58E-10 | 0.008401 |
| 22Feb2011 | 10989 | 521.95  | 11.09156 | 3 R.SPFENVF chr2@1575   | 1.65E-10 | 0.004518 |
| 22Feb2011 | 8374  | 549.81  | 21.09697 | 2 R.RYALGFS chr3@1334   | 1.27E-10 | 0.003801 |
| 22Feb2011 | 17031 | 811.94  | -13.8486 | 2 R.FLTTFQF5 chrX@1630  | 3.98E-11 | 8.12E-04 |
| 22Feb2011 | 17965 | 811.94  | -13.8486 | 2 R.FLTTFQF5 chrX@1630  | 1.11E-10 | 0.002133 |
| 22Feb2011 | 17808 | 811.94  | -13.8486 | 2 R.FLTTFQF5 chrX@1630  | 1.95E-11 | 4.22E-04 |
| 22Feb2011 | 12722 | 833.42  | -28.868  | 2 K.FSKRYIIC chr4@7075  | 3.42E-10 | 0.007931 |
| 22Feb2011 | 5606  | 417.57  | 3.711882 | 3 K.TPSFVAF7 chr5@1854  | 3.55E-10 | 0.009264 |
| 22Feb2011 | 24751 | 1123.88 | -9.18823 | 3 L.ESNM+15 chrX@1694   | 1.58E-10 | 0.003418 |
| 22Feb2011 | 19680 | 840.73  | 12.04727 | 3 K.NDHMSE chr4@8720    | 1.41E-10 | 0.003283 |
| 22Feb2011 | 23896 | 637.15  | 19.4458  | 5 R.QARIVTP chr4@7635   | 6.38E-11 | 0.001567 |
| 22Feb2011 | 5076  | 616.34  | 16.63    | 2 K.NINNATF chr3@1160   | 5.25E-10 | 0.00995  |
| 22Feb2011 | 28272 | 949.59  | 12.93322 | 4 R.EKTEEKRI chr2@2935  | 9.08E-11 | 0.002601 |
| 22Feb2011 | 4109  | 497.25  | 28.28958 | 2 _NQAAEAI Splice@chr   | 5.01E-10 | 0.007385 |
| 22Feb2011 | 4049  | 497.25  | 28.28958 | 2 _NQAAEAI Splice@chr   | 1.43E-10 | 0.002016 |
| 22Feb2011 | 3994  | 497.25  | 28.28958 | 2 _NQAAEAI Splice@chr   | 1.28E-10 | 0.001943 |
| 22Feb2011 | 5158  | 497.25  | 28.28958 | 2 _NQAAEAI Splice@chr   | 5.96E-12 | 5.61E-04 |
| 22Feb2011 | 5215  | 497.25  | 28.28958 | 2 _NQAAEAI Splice@chr   | 6.34E-12 | 5.61E-04 |
| 22Feb2011 | 3977  | 497.25  | 28.28958 | 2 _NQAAEAI Splice@chr   | 7.02E-11 | 0.001124 |
| 22Feb2011 | 5106  | 497.25  | 28.28958 | 2 _NQAAEAI Splice@chr   | 1.35E-10 | 0.002958 |
| 22Feb2011 | 3836  | 497.25  | 28.28958 | 2 _NQAAEAI Splice@chr   | 3.57E-10 | 0.008591 |
| 22Feb2011 | 3891  | 497.25  | 28.28958 | 2 _NQAAEAI Splice@chr   | 1.78E-11 | 7.24E-04 |
| 22Feb2011 | 4796  | 497.25  | 28.28958 | 2 _NQAAEAI Splice@chr   | 8.28E-11 | 0.002023 |
| 22Feb2011 | 5071  | 497.25  | 28.28958 | 2 _NQAAEAI Splice@chr   | 3.02E-11 | 6.62E-04 |
| 22Feb2011 | 5424  | 497.25  | 28.28958 | 2 _NQAAEAI Splice@chr   | 1.84E-10 | 0.006491 |
| 22Feb2011 | 5501  | 497.25  | 28.28958 | 2 _NQAAEAI Splice@chr   | 1.31E-10 | 0.003881 |
| 22Feb2011 | 5558  | 497.25  | 28.28958 | 2 _NQAAEAI Splice@chr   | 5.70E-11 | 0.001474 |
| 22Feb2011 | 5438  | 497.25  | 28.28958 | 2 _NQAAEAI Splice@chr   | 1.36E-10 | 0.003196 |
| 22Feb2011 | 4712  | 497.25  | 28.28958 | 2 _NQAAEAI Splice@chr   | 3.00E-11 | 0.001158 |
| 22Feb2011 | 4489  | 497.25  | 28.28958 | 2 _NQAAEAI Splice@chr   | 1.33E-10 | 0.004142 |
| 22Feb2011 | 4670  | 497.25  | 28.28958 | 2 _NQAAEAI Splice@chr   | 2.09E-11 | 7.74E-04 |

|           |       |         |          |                         |          |          |
|-----------|-------|---------|----------|-------------------------|----------|----------|
| 22Feb2011 | 5412  | 497.25  | 28.28958 | 2 _..NQAAEAI Splice@chr | 7.07E-11 | 0.001687 |
| 22Feb2011 | 5609  | 497.25  | 28.28958 | 2 _..NQAAEAI Splice@chr | 1.56E-11 | 4.98E-04 |
| 22Feb2011 | 5665  | 497.25  | 28.28958 | 2 _..NQAAEAI Splice@chr | 1.04E-10 | 0.002341 |
| 22Feb2011 | 4396  | 497.25  | 28.28958 | 2 _..NQAAEAI Splice@chr | 4.53E-12 | 2.10E-04 |
| 22Feb2011 | 4445  | 497.25  | 28.28958 | 2 _..NQAAEAI Splice@chr | 6.16E-11 | 0.001215 |
| 22Feb2011 | 5302  | 497.25  | 28.28958 | 2 _..NQAAEAI Splice@chr | 4.94E-11 | 0.001274 |
| 22Feb2011 | 5358  | 497.25  | 28.28958 | 2 _..NQAAEAI Splice@chr | 2.08E-11 | 5.34E-04 |
| 22Feb2011 | 5401  | 497.25  | 28.28958 | 2 _..NQAAEAI Splice@chr | 3.63E-11 | 6.19E-04 |
| 22Feb2011 | 5343  | 497.25  | 28.28958 | 2 _..NQAAEAI Splice@chr | 3.57E-11 | 6.19E-04 |
| 22Feb2011 | 5079  | 497.25  | 28.28958 | 2 _..NQAAEAI Splice@chr | 3.46E-10 | 0.007601 |
| 22Feb2011 | 5083  | 497.25  | 28.28958 | 2 _..NQAAEAI Splice@chr | 5.00E-12 | 0        |
| 22Feb2011 | 5145  | 497.25  | 28.28958 | 2 _..NQAAEAI Splice@chr | 2.80E-11 | 0.001016 |
| 22Feb2011 | 5164  | 497.25  | 28.28958 | 2 _..NQAAEAI Splice@chr | 4.06E-10 | 0.007105 |
| 22Feb2011 | 5112  | 497.25  | 28.28958 | 2 _..NQAAEAI Splice@chr | 1.33E-10 | 0.003342 |
| 22Feb2011 | 4902  | 497.25  | 28.28958 | 2 _..NQAAEAI Splice@chr | 2.12E-10 | 0.005051 |
| 22Feb2011 | 4952  | 497.25  | 28.28958 | 2 _..NQAAEAI Splice@chr | 9.99E-12 | 5.78E-04 |
| 22Feb2011 | 5025  | 497.25  | 28.28958 | 2 _..NQAAEAI Splice@chr | 1.27E-10 | 0.002746 |
| 22Feb2011 | 4969  | 497.25  | 28.28958 | 2 _..NQAAEAI Splice@chr | 5.90E-11 | 0.001166 |
| 22Feb2011 | 5032  | 497.25  | 28.28958 | 2 _..NQAAEAI Splice@chr | 5.92E-11 | 0.001575 |
| 22Feb2011 | 4818  | 497.25  | 28.28958 | 2 _..NQAAEAI Splice@chr | 2.38E-10 | 0.00532  |
| 22Feb2011 | 4875  | 497.25  | 28.28958 | 2 _..NQAAEAI Splice@chr | 1.34E-11 | 2.28E-04 |
| 22Feb2011 | 4997  | 497.25  | 28.28958 | 2 _..NQAAEAI Splice@chr | 3.21E-10 | 0.006439 |
| 22Feb2011 | 4940  | 497.25  | 28.28958 | 2 _..NQAAEAI Splice@chr | 2.81E-11 | 0.001163 |
| 22Feb2011 | 5651  | 497.25  | 28.28958 | 2 _..NQAAEAI Splice@chr | 1.76E-10 | 0.00417  |
| 22Feb2011 | 5597  | 497.25  | 28.28958 | 2 _..NQAAEAI Splice@chr | 2.28E-10 | 0.00565  |
| 22Feb2011 | 5862  | 497.25  | 28.28958 | 2 _..NQAAEAI Splice@chr | 1.14E-11 | 5.86E-04 |
| 22Feb2011 | 5917  | 497.25  | 28.28958 | 2 _..NQAAEAI Splice@chr | 4.42E-11 | 0.001575 |
| 22Feb2011 | 26169 | 816.45  | -25.4327 | 3 R.KQDK+14 chr5@9962   | 4.41E-11 | 5.81E-04 |
| 22Feb2011 | 23211 | 903.47  | -8.18562 | 3 K.CSNSHCC chrX@1559   | 3.02E-10 | 0.006499 |
| 22Feb2011 | 21572 | 1008.56 | 14.8199  | 2 _..KEALPVH chr2@1318  | 3.78E-10 | 0.008344 |
| 22Feb2011 | 24850 | 859.44  | 11.41972 | 2 R.K+14.016 chr1@1456  | 1.48E-10 | 0.00341  |
| 22Feb2011 | 18566 | 726.38  | 28.6729  | 2 R.KNRM+1. Splice@chr  | 4.03E-10 | 0.009302 |
| 22Feb2011 | 19672 | 968.17  | 20.56027 | 3 R.ENLNCFK chr4@9175   | 4.34E-10 | 0.008466 |
| 22Feb2011 | 20201 | 840.73  | -3.39839 | 4 K.SSANPAN chr1@1107   | 3.16E-10 | 0.00698  |
| 22Feb2011 | 26843 | 859.78  | -21.4947 | 3 K.SSLISDKIC chr5@1781 | 2.93E-10 | 0.00614  |
| 22Feb2011 | 25630 | 917.92  | 5.629107 | 2 K.TENIEKSE chr2@6325  | 3.65E-10 | 0.006139 |
| 22Feb2011 | 17265 | 1065.15 | -12.7712 | 3 I.SRSAAM+ Splice@chr  | 5.21E-11 | 9.63E-04 |
| 22Feb2011 | 18623 | 742.88  | -16.4226 | 2 L.FKKFSCPC chr2@8865  | 2.87E-10 | 0.005712 |
| 22Feb2011 | 455   | 496.26  | 12.8788  | 2 R.LGTCQGS chr3@1374   | 4.86E-10 | 0.009905 |
| 22Feb2011 | 19619 | 882.41  | -9.59497 | 2 _..FQKMDF: Splice@chr | 4.38E-10 | 0.006535 |
| 22Feb2011 | 20649 | 882.41  | -9.59497 | 2 _..FQKMDF: Splice@chr | 3.27E-10 | 0.007511 |
| 22Feb2011 | 26225 | 1105.21 | -11.0549 | 3 K.LAFDDAI: Splice@chr | 9.60E-12 | 2.21E-04 |
| 22Feb2011 | 27116 | 1105.21 | -11.0549 | 3 K.LAFDDAI: Splice@chr | 2.02E-10 | 0.004921 |
| 22Feb2011 | 27600 | 1105.21 | -11.0549 | 3 K.LAFDDAI: Splice@chr | 4.85E-10 | 0.009465 |
| 22Feb2011 | 24084 | 816.45  | -23.7355 | 3 K.KNEK KKK Splice@chr | 3.84E-10 | 0.005473 |
| 22Feb2011 | 25747 | 816.45  | -23.7355 | 3 K.KNEK+14 Splice@chr  | 2.83E-10 | 0.005776 |
| 22Feb2011 | 26172 | 821.12  | -25.9827 | 3 K.KNEK+14 Splice@chr  | 8.88E-11 | 0.001465 |

|           |       |         |          |                         |          |          |
|-----------|-------|---------|----------|-------------------------|----------|----------|
| 22Feb2011 | 25935 | 816.45  | -23.7355 | 3 K.KNEK+14 Splice@chr  | 1.05E-10 | 0.001725 |
| 22Feb2011 | 24842 | 816.45  | -23.7355 | 3 K.KNEK+14 Splice@chr  | 3.50E-10 | 0.007123 |
| 22Feb2011 | 24408 | 816.45  | -23.7355 | 3 K.KNEK+14 Splice@chr  | 7.29E-11 | 0.002265 |
| 22Feb2011 | 25840 | 816.45  | -23.7355 | 3 K.KNEK+14 Splice@chr  | 3.92E-10 | 0.008492 |
| 22Feb2011 | 24025 | 816.45  | -23.7355 | 3 K.KNEKK+1 Splice@chr  | 3.16E-10 | 0.008435 |
| 22Feb2011 | 25043 | 816.45  | -23.7355 | 3 K.KNEKKKK Splice@chr  | 3.72E-10 | 0.007383 |
| 22Feb2011 | 26336 | 816.45  | -23.7355 | 3 K.KNEK+14 Splice@chr  | 3.16E-10 | 0.006659 |
| 22Feb2011 | 26441 | 816.45  | -23.7355 | 3 K.KNEK+14 Splice@chr  | 5.69E-10 | 0.009466 |
| 22Feb2011 | 26394 | 816.45  | -23.7355 | 3 K.KNEK+14 Splice@chr  | 1.78E-10 | 0.003406 |
| 22Feb2011 | 25310 | 816.45  | -23.7355 | 3 K.KNEK+14 Splice@chr  | 3.27E-11 | 9.30E-04 |
| 22Feb2011 | 25137 | 816.45  | -23.7355 | 3 K.KNEKK+1 Splice@chr  | 1.95E-10 | 0.003914 |
| 22Feb2011 | 26113 | 816.45  | -23.7355 | 3 K.KNEK+14 Splice@chr  | 1.22E-10 | 0.003374 |
| 22Feb2011 | 8817  | 674.84  | 0        | 2 R.RKSSQDS chr4@8883   | 3.23E-10 | 0.008611 |
| 22Feb2011 | 13128 | 889.69  | 24.20073 | 4 K.NNPYMS Splice@chr   | 1.68E-10 | 0.004297 |
| 22Feb2011 | 23161 | 979.77  | -5.05209 | 3 _GCSFVPI Splice@chr   | 5.11E-10 | 0.009388 |
| 22Feb2011 | 12089 | 540.28  | 25.32205 | 2 R.FTCPGNA chr1@1192   | 3.35E-10 | 0.007523 |
| 22Feb2011 | 3096  | 510.28  | -0.35954 | 2 K.WDSGKV chr2@1264    | 1.12E-10 | 0.003294 |
| 22Feb2011 | 19939 | 897.5   | 25.7854  | 2 K.FFQNFGL chr3@2602   | 1.52E-10 | 0.004314 |
| 22Feb2011 | 21877 | 1078.57 | 18.39019 | 2 F.EM+15.9' Splice@chr | 3.27E-10 | 0.008367 |
| 22Feb2011 | 20839 | 1078.57 | 18.39019 | 2 F.EM+15.9' Splice@chr | 2.13E-10 | 0.004633 |
| 22Feb2011 | 22021 | 1078.57 | 18.39019 | 2 F.EM+15.9' Splice@chr | 4.96E-10 | 0.009424 |
| 22Feb2011 | 1072  | 415.23  | 18.33724 | 3 _LLNSYSGI chrX@6459   | 1.18E-10 | 0.003644 |
| 22Feb2011 | 915   | 414.89  | 4.915687 | 3 _LLNSYSGI chrX@6459   | 8.74E-11 | 0.002611 |
| 22Feb2011 | 893   | 414.9   | 29.00255 | 3 _LLNSYSGI chrX@6459   | 7.61E-11 | 0.002353 |
| 22Feb2011 | 968   | 414.9   | 29.00255 | 3 _LLNSYSGI chrX@6459   | 1.92E-10 | 0.004836 |
| 22Feb2011 | 1030  | 415.23  | 18.33724 | 3 _LLNSYSGI chrX@6459   | 2.48E-10 | 0.005688 |
| 22Feb2011 | 545   | 414.89  | 4.915687 | 3 _LLNSYSGI chrX@6459   | 3.40E-10 | 0.006507 |
| 22Feb2011 | 460   | 414.89  | 4.915687 | 3 _LLNSYSGI chrX@6459   | 1.38E-10 | 0.002637 |
| 22Feb2011 | 1013  | 414.89  | 4.915687 | 3 _LLNSYSGI chrX@6459   | 4.28E-11 | 0.001296 |
| 22Feb2011 | 1340  | 414.9   | 29.00255 | 3 _LLNSYSGI chrX@6459   | 5.17E-10 | 0.009684 |
| 22Feb2011 | 363   | 414.9   | 29.00255 | 3 _LLNSYSGI chrX@6459   | 4.75E-10 | 0.008009 |
| 22Feb2011 | 936   | 414.89  | 4.915687 | 3 _LLNSYSGI chrX@6459   | 2.99E-10 | 0.005662 |
| 22Feb2011 | 396   | 414.89  | 4.915687 | 3 _LLNSYSGI chrX@6459   | 4.54E-10 | 0.007955 |
| 22Feb2011 | 534   | 414.89  | 4.915687 | 3 _LLNSYSGI chrX@6459   | 5.67E-10 | 0.009466 |
| 22Feb2011 | 472   | 414.89  | 4.915687 | 3 _LLNSYSGI chrX@6459   | 5.10E-11 | 7.77E-04 |
| 22Feb2011 | 508   | 414.89  | 4.915687 | 3 _LLNSYSGI chrX@6459   | 3.05E-10 | 0.00573  |
| 22Feb2011 | 17499 | 783.41  | -16.4598 | 4 _IDRENML chr5@1834    | 2.74E-10 | 0.005091 |
| 22Feb2011 | 24836 | 673.61  | -14.3193 | 4 K.QNSQRL chr3@1272    | 2.32E-10 | 0.00407  |
| 22Feb2011 | 24309 | 673.61  | -14.3193 | 4 K.QNSQRL chr3@1272    | 3.88E-10 | 0.00801  |
| 22Feb2011 | 23409 | 673.61  | -14.3193 | 4 K.QNSQRL chr3@1272    | 1.30E-10 | 0.00269  |
| 22Feb2011 | 20828 | 758.15  | -28.2827 | 4 R.TRVEAYC chr2@6335   | 5.07E-10 | 0.00983  |
| 22Feb2011 | 7111  | 488.28  | -15.0308 | 2 R.PFLGFLG chr4@1349   | 4.09E-10 | 0.008896 |
| 22Feb2011 | 15305 | 601.81  | -29.1412 | 4 _LFQLFRG chr4@3873    | 9.77E-11 | 0.003279 |
| 22Feb2011 | 13527 | 700.85  | -26.1631 | 2 K.FPANRQ1 chr2@1025   | 3.82E-10 | 0.006369 |
| 22Feb2011 | 13567 | 701.35  | -28.5599 | 2 K.FPANRQ1 chr2@1025   | 4.85E-10 | 0.009225 |
| 22Feb2011 | 19776 | 929.46  | 5.474826 | 4 _SGVAIEN Splice@chr   | 4.05E-10 | 0.008172 |
| 22Feb2011 | 2604  | 450.76  | 24.36025 | 2 R.VQNDGV chr5@1744    | 1.28E-10 | 0.002364 |

|           |       |         |          |                         |          |          |
|-----------|-------|---------|----------|-------------------------|----------|----------|
| 22Feb2011 | 11441 | 737.66  | -9.69735 | 3 K.HQK+14.l chrX@1508  | 5.08E-11 | 0.001474 |
| 22Feb2011 | 18973 | 740.35  | -28.5076 | 3 _K+14.016 chr4@8228   | 2.88E-10 | 0.005691 |
| 22Feb2011 | 8635  | 496.3   | 23.59922 | 2 R.ELLFGTRI chrX@2676  | 2.99E-10 | 0.005765 |
| 22Feb2011 | 23208 | 866.74  | 16.63856 | 3 S.MTCRDE( chrX@4604   | 2.51E-10 | 0.005221 |
| 22Feb2011 | 22243 | 934.26  | 5.315822 | 4 R.HHSFCDI( chr4@4808  | 2.72E-10 | 0.003938 |
| 22Feb2011 | 23397 | 934.26  | 5.315822 | 4 R.HHSFCDI( chr4@4808  | 6.10E-10 | 0.009922 |
| 22Feb2011 | 23898 | 934.26  | 5.315822 | 4 R.HHSFCDI( chr4@4808  | 2.66E-10 | 0.005457 |
| 22Feb2011 | 24321 | 934.25  | -5.4128  | 4 R.HHSFCDI( chr4@4808  | 2.57E-11 | 0.001144 |
| 22Feb2011 | 24205 | 934.26  | 5.315822 | 4 R.HHSFCDI( chr4@4808  | 2.58E-10 | 0.0053   |
| 22Feb2011 | 24295 | 934.26  | 5.315822 | 4 R.HHSFCDI( chr4@4808  | 5.94E-10 | 0.009971 |
| 22Feb2011 | 24166 | 934.26  | 5.315822 | 4 R.HHSFCDI( chr4@4808  | 2.26E-10 | 0.00449  |
| 22Feb2011 | 23339 | 934.26  | 5.315822 | 4 R.HHSFCDI( chr4@4808  | 3.17E-10 | 0.007447 |
| 22Feb2011 | 24623 | 1022.51 | -28.2441 | 2 C.QFNNVF\$ chr1@7688  | 4.70E-10 | 0.009759 |
| 22Feb2011 | 26385 | 569.28  | -21.4805 | 2 R.LPHYGM( chr1@1115   | 6.09E-11 | 0.002823 |
| 22Feb2011 | 27079 | 813.14  | 8.617758 | 3 R.TK+14.01 chrX@9566  | 2.76E-10 | 0.006819 |
| 22Feb2011 | 3103  | 733.39  | 23.00178 | 1 R.DETIAGK( chr4@6865  | 2.28E-10 | 0.00534  |
| 22Feb2011 | 2185  | 733.39  | 23.00178 | 1 R.DETIAGK( chr4@6865  | 2.24E-10 | 0.005108 |
| 22Feb2011 | 4535  | 733.39  | 23.00178 | 1 R.DETIAGK( chr4@6865  | 3.31E-10 | 0.007426 |
| 22Feb2011 | 936   | 473.58  | 22.64573 | 3 L.ADGRSNI( chr3@8699  | 1.77E-10 | 0.00417  |
| 22Feb2011 | 14119 | 863.42  | 10.87128 | 2 L.PDVK+14 chr5@1100   | 3.13E-10 | 0.007088 |
| 22Feb2011 | 21899 | 812.43  | -23.5311 | 4 K.NAGIFLL( Splice@chr | 2.03E-10 | 0.005073 |
| 22Feb2011 | 11897 | 691.4   | -28.8197 | 2 K.IFSLK+14 chr1@3005  | 6.48E-11 | 0.002676 |
| 24Mar2011 | 11736 | 685.69  | -18.3039 | 3 R.PVTRK+1 chr2@3857   | 6.52E-10 | 0.008654 |
| 22Feb2011 | 26325 | 968.17  | -12.7723 | 3 P.KNFSISSK chr4@8026  | 1.07E-10 | 0.001725 |
| 22Feb2011 | 2533  | 574.25  | -18.3131 | 2 _ENGTA( chr5@1732     | 7.43E-11 | 0.002034 |
| 22Feb2011 | 1091  | 574.25  | -18.3131 | 2 _ENGTA( chr5@1732     | 1.24E-10 | 0.004021 |
| 22Feb2011 | 1051  | 574.25  | -18.3131 | 2 _ENGTA( chr5@1732     | 1.33E-10 | 0.003427 |
| 22Feb2011 | 1094  | 574.25  | -18.3131 | 2 _ENGTA( chr5@1732     | 3.64E-10 | 0.008476 |
| 22Feb2011 | 9190  | 535.32  | -4.60885 | 3 K.NIINPKFP chr4@9320  | 1.91E-11 | 6.23E-04 |
| 22Feb2011 | 9184  | 535.32  | -4.60885 | 3 K.NIINPKFP chr4@9320  | 1.96E-10 | 0.004793 |
| 22Feb2011 | 9195  | 535.32  | -4.60885 | 3 K.NIINPKFP chr4@9320  | 5.63E-11 | 9.17E-04 |
| 22Feb2011 | 8462  | 665.99  | -25.1906 | 3 K.VLAGCSP chr5@2101   | 1.31E-10 | 0.002607 |
| 22Feb2011 | 14396 | 597.97  | -18.6079 | 3 K.ISKCQTE1 Splice@chr | 4.56E-11 | 9.19E-04 |
| 22Feb2011 | 14664 | 560.31  | 1.527785 | 2 _GFFHGKL Splice@chr   | 1.22E-10 | 0.002554 |
| 22Feb2011 | 23222 | 660.07  | 29.62104 | 3 K.KGDFDTIS( chr4@1257 | 2.68E-10 | 0.005893 |
| 22Feb2011 | 12849 | 614.99  | -0.99409 | 3 ?.KSSKDEN Splice@chr  | 3.75E-10 | 0.009664 |
| 22Feb2011 | 14200 | 615.32  | -8.24975 | 3 ?.KSSKDEN Splice@chr  | 2.26E-10 | 0.005064 |
| 22Feb2011 | 13556 | 615.32  | -8.24975 | 3 ?.KSSKDEN Splice@chr  | 3.76E-10 | 0.009624 |
| 22Feb2011 | 5529  | 495.63  | 28.2177  | 3 K.ITIPPEAK( chr5@1117 | 3.86E-10 | 0.009664 |
| 22Feb2011 | 6556  | 495.63  | 28.2177  | 3 K.ITIPPEAK( chr5@1117 | 2.33E-10 | 0.004475 |
| 22Feb2011 | 7103  | 495.63  | 28.2177  | 3 K.ITIPPEAK( chr5@1117 | 1.25E-10 | 0.002226 |
| 22Feb2011 | 6186  | 495.63  | 28.2177  | 3 K.ITIPPEAK( chr5@1117 | 3.64E-10 | 0.007155 |
| 22Feb2011 | 7319  | 491.25  | 21.1032  | 2 K.QMGFE( chrX@2275    | 4.00E-10 | 0.007816 |
| 22Feb2011 | 8201  | 491.25  | 21.1032  | 2 K.QMGFE( chrX@2275    | 5.63E-10 | 0.009466 |
| 22Feb2011 | 8553  | 491.25  | 21.1032  | 2 K.QMGFE( chrX@2275    | 2.51E-10 | 0.005986 |
| 22Feb2011 | 797   | 479.72  | -28.3039 | 2 R.QEATAEC( chr5@1845  | 2.70E-10 | 0.006862 |
| 22Feb2011 | 580   | 479.72  | -28.3039 | 2 R.QEATAEC( chr5@1845  | 1.33E-10 | 0.003211 |

|           |       |        |          |                         |          |          |
|-----------|-------|--------|----------|-------------------------|----------|----------|
| 22Feb2011 | 987   | 479.72 | -28.3039 | 2 R.QEATAEC chr5@1845   | 2.05E-10 | 0.004338 |
| 22Feb2011 | 557   | 479.72 | -28.3039 | 2 R.QEATAEC chr5@1845   | 3.05E-11 | 6.62E-04 |
| 22Feb2011 | 642   | 479.72 | -28.3039 | 2 R.QEATAEC chr5@1845   | 7.68E-12 | 1.05E-04 |
| 22Feb2011 | 968   | 479.72 | -28.3039 | 2 R.QEATAEC chr5@1845   | 2.55E-10 | 0.005314 |
| 22Feb2011 | 485   | 479.72 | -28.3039 | 2 R.QEATAEC chr5@1845   | 2.62E-11 | 5.73E-04 |
| 22Feb2011 | 532   | 479.72 | -28.3039 | 2 R.QEATAEC chr5@1845   | 2.98E-11 | 6.62E-04 |
| 22Feb2011 | 624   | 479.72 | -28.3039 | 2 R.QEATAEC chr5@1845   | 1.22E-11 | 2.04E-04 |
| 22Feb2011 | 1027  | 479.72 | -28.3039 | 2 R.QEATAEC chr5@1845   | 3.96E-10 | 0.007884 |
| 22Feb2011 | 948   | 479.72 | -28.3039 | 2 R.QEATAEC chr5@1845   | 1.23E-10 | 0.00315  |
| 22Feb2011 | 657   | 479.72 | -28.3039 | 2 R.QEATAEC chr5@1845   | 1.34E-11 | 2.95E-04 |
| 22Feb2011 | 509   | 479.72 | -28.3039 | 2 R.QEATAEC chr5@1845   | 1.12E-11 | 2.04E-04 |
| 22Feb2011 | 1043  | 479.72 | -28.3039 | 2 R.QEATAEC chr5@1845   | 3.90E-10 | 0.007811 |
| 22Feb2011 | 603   | 479.72 | -28.3039 | 2 R.QEATAEC chr5@1845   | 9.81E-12 | 2.04E-04 |
| 22Feb2011 | 1004  | 479.72 | -28.3039 | 2 R.QEATAEC chr5@1845   | 6.15E-11 | 0.001867 |
| 22Feb2011 | 481   | 479.72 | -28.3039 | 2 R.QEATAEC chr5@1845   | 1.46E-10 | 0.003363 |
| 22Feb2011 | 618   | 479.72 | -28.3039 | 2 R.QEATAEC chr5@1845   | 4.95E-11 | 0.00103  |
| 22Feb2011 | 681   | 479.72 | -28.3039 | 2 R.QEATAEC chr5@1845   | 8.09E-11 | 0.00165  |
| 22Feb2011 | 514   | 479.72 | -28.3039 | 2 R.QEATAEC chr5@1845   | 1.49E-10 | 0.003467 |
| 22Feb2011 | 2560  | 479.72 | -28.3039 | 2 R.QEATAEC chr5@1845   | 4.07E-10 | 0.007817 |
| 22Feb2011 | 199   | 479.72 | -28.3039 | 2 R.QEATAEC chr5@1845   | 1.53E-10 | 0.004712 |
| 22Feb2011 | 1344  | 479.72 | -28.3039 | 2 R.QEATAEC chr5@1845   | 1.19E-11 | 5.83E-04 |
| 22Feb2011 | 1178  | 479.72 | -28.3039 | 2 R.QEATAEC chr5@1845   | 3.34E-11 | 9.35E-04 |
| 22Feb2011 | 1316  | 479.72 | -28.3039 | 2 R.QEATAEC chr5@1845   | 1.29E-11 | 5.83E-04 |
| 22Feb2011 | 1218  | 479.72 | -28.3039 | 2 R.QEATAEC chr5@1845   | 2.22E-11 | 5.83E-04 |
| 22Feb2011 | 1260  | 479.72 | -28.3039 | 2 R.QEATAEC chr5@1845   | 8.92E-11 | 0.0019   |
| 22Feb2011 | 1288  | 479.72 | -28.3039 | 2 R.QEATAEC chr5@1845   | 2.49E-11 | 6.74E-04 |
| 22Feb2011 | 1354  | 479.72 | -28.3039 | 2 R.QEATAEC chr5@1845   | 6.36E-12 | 5.15E-04 |
| 22Feb2011 | 1386  | 479.72 | -28.3039 | 2 R.QEATAEC chr5@1845   | 2.37E-11 | 6.19E-04 |
| 22Feb2011 | 1328  | 479.72 | -28.3039 | 2 R.QEATAEC chr5@1845   | 1.21E-12 | 0        |
| 22Feb2011 | 239   | 479.72 | -28.3039 | 2 R.QEATAEC chr5@1845   | 5.17E-11 | 0.001219 |
| 22Feb2011 | 268   | 479.72 | -28.3039 | 2 R.QEATAEC chr5@1845   | 7.74E-11 | 0.002382 |
| 22Feb2011 | 26817 | 785.92 | -20.8902 | 2 K.FYLRK+14 chrX@1004  | 4.83E-10 | 0.009665 |
| 22Feb2011 | 25324 | 785.92 | -20.8902 | 2 K.FYLRK+14 chrX@1004  | 1.78E-11 | 2.14E-04 |
| 22Feb2011 | 12146 | 657.68 | 24.66232 | 3 R.QACRQA chr2@1141    | 2.97E-10 | 0.005771 |
| 22Feb2011 | 6706  | 813.39 | -3.53115 | 1 R.SSMYGLF chr4@9981   | 2.54E-10 | 0.005524 |
| 22Feb2011 | 6802  | 790.41 | 25.6703  | 2 R.SRNDLK+ chr3@5607   | 3.79E-10 | 0.008188 |
| 22Feb2011 | 18308 | 861.46 | -2.1753  | 3 K.LYNNVKN chr2@8946   | 4.04E-10 | 0.009684 |
| 22Feb2011 | 21724 | 605.35 | -1.1106  | 5 K.VILIFSSQI chr5@1409 | 1.81E-10 | 0.003993 |
| 22Feb2011 | 21054 | 882.48 | 20.98085 | 1 K.MMMITK chr1@1395    | 5.45E-10 | 0.009796 |
| 22Feb2011 | 16047 | 798.73 | -14.8941 | 3 R.LFM+15.1 chr4@1665  | 4.46E-10 | 0.007955 |
| 22Feb2011 | 13580 | 871.46 | -22.0634 | 2 R.LICLVSK+ Splice@chr | 1.93E-10 | 0.004296 |
| 22Feb2011 | 19735 | 787.39 | 17.38609 | 3 K.GFFSCQN chr5@1741   | 4.53E-10 | 0.008892 |
| 22Feb2011 | 20147 | 716.66 | 16.40301 | 4 R.PQSSIGLI Splice@chr | 1.32E-11 | 4.13E-04 |
| 22Feb2011 | 21491 | 716.41 | 17.57538 | 4 R.PQSSIGLI Splice@chr | 2.15E-11 | 3.90E-04 |
| 22Feb2011 | 20462 | 716.41 | 17.57538 | 4 R.PQSSIGLI Splice@chr | 2.36E-10 | 0.004475 |
| 22Feb2011 | 21118 | 716.41 | 17.57538 | 4 R.PQSSIGLI Splice@chr | 2.83E-10 | 0.006776 |
| 22Feb2011 | 20731 | 716.41 | 17.57538 | 4 R.PQSSIGLI Splice@chr | 4.50E-10 | 0.00838  |

|           |       |         |          |                         |          |          |
|-----------|-------|---------|----------|-------------------------|----------|----------|
| 22Feb2011 | 20778 | 716.41  | 17.57538 | 4 R.PQSSIGLI Splice@chr | 2.29E-10 | 0.004869 |
| 22Feb2011 | 21638 | 716.41  | 17.57538 | 4 R.PQSSIGLI Splice@chr | 2.61E-10 | 0.00539  |
| 22Feb2011 | 21922 | 716.41  | 17.57538 | 4 R.PQSSIGLI Splice@chr | 2.72E-11 | 6.35E-04 |
| 22Feb2011 | 24372 | 707.36  | 26.42656 | 3 K.TKPICSSG chr4@1000  | 4.75E-11 | 8.00E-04 |
| 22Feb2011 | 16548 | 574.31  | -3.47776 | 3 K.ITFLELSLF chrX@4634 | 2.77E-10 | 0.006183 |
| 22Feb2011 | 10183 | 447.93  | 20.84978 | 3 R.ILPRVAM Splice@chr  | 5.09E-10 | 0.008974 |
| 22Feb2011 | 22745 | 803.73  | 15.51143 | 3 K.KFHISGAI chr3@9345  | 9.93E-11 | 0.001959 |
| 22Feb2011 | 13768 | 711.89  | -25.5587 | 2 K.GLEQLYK Splice@chr  | 1.05E-10 | 0.003007 |
| 22Feb2011 | 8390  | 546.95  | 2.683155 | 3 K.TM+15.9 chr3@2700   | 3.78E-10 | 0.007675 |
| 22Feb2011 | 4748  | 451.9   | -7.94137 | 3 K.VCKSGGV chrX@9880   | 2.88E-10 | 0.006373 |
| 22Feb2011 | 12181 | 556.81  | -7.24771 | 2 R.IPEAAELL chr4@1361  | 2.50E-10 | 0.005696 |
| 22Feb2011 | 17391 | 505.53  | -21.1099 | 4 K.AILEIRGY chr2@6532  | 1.48E-10 | 0.003297 |
| 22Feb2011 | 20853 | 658.9   | 6.030333 | 2 _..LLNFNLL Splice@chr | 2.43E-10 | 0.005616 |
| 22Feb2011 | 7328  | 416.22  | -9.11376 | 2 K.LIDSMPR chrX@1131   | 4.23E-10 | 0.008433 |
| 22Feb2011 | 6900  | 416.22  | -9.11376 | 2 K.LIDSMPR chrX@1131   | 4.23E-10 | 0.00777  |
| 22Feb2011 | 7374  | 416.22  | -9.11376 | 2 K.LIDSMPR chrX@1131   | 4.23E-10 | 0.008872 |
| 22Feb2011 | 7518  | 416.22  | -9.11376 | 2 K.LIDSMPR chrX@1131   | 4.23E-10 | 0.00835  |
| 22Feb2011 | 7433  | 416.23  | 14.99361 | 2 K.LIDSMPR chrX@1131   | 4.24E-10 | 0.00777  |
| 22Feb2011 | 7118  | 416.22  | -9.11376 | 2 K.LIDSMPR chrX@1131   | 4.23E-10 | 0.009964 |
| 22Feb2011 | 7853  | 416.22  | -9.11376 | 2 K.LIDSMPR chrX@1131   | 4.23E-10 | 0.008466 |
| 22Feb2011 | 20400 | 1000.81 | -26.1152 | 3 _..DLKPPDIF chrX@1525 | 8.30E-11 | 0.001435 |
| 22Feb2011 | 26384 | 861.42  | -6.78808 | 3 K.M+15.99 chr5@1145   | 4.10E-10 | 0.008237 |
| 22Feb2011 | 27272 | 861.43  | 4.850053 | 3 K.M+15.99 chr5@1145   | 3.81E-10 | 0.007129 |
| 22Feb2011 | 9313  | 716.33  | -2.50287 | 3 G.MSLPCCf Splice@chr  | 4.12E-10 | 0.009905 |
| 22Feb2011 | 3855  | 494.28  | 4.825698 | 2 _..ANSLDLN chr4@1695  | 3.86E-10 | 0.00768  |
| 22Feb2011 | 149   | 450.25  | -23.6395 | 3 K.IMQEKSP Splice@chr  | 9.03E-11 | 0.003089 |
| 22Feb2011 | 23817 | 728.63  | -19.2088 | 4 I.AESAVLSE Splice@chr | 3.95E-10 | 0.00825  |
| 22Feb2011 | 3312  | 524.27  | -16.0516 | 2 K.IKCFEPPR chr4@1711  | 5.00E-10 | 0.009875 |
| 22Feb2011 | 12457 | 423.92  | -24.534  | 3 R.ENVTLRL chr3@3811   | 5.59E-10 | 0.009688 |
| 22Feb2011 | 4442  | 765.86  | 4.149614 | 2 K.LEHYSHR chr5@1815   | 2.46E-10 | 0.004993 |
| 22Feb2011 | 19883 | 854.46  | -22.4554 | 2 K.ERYKKVS chr1@1167   | 2.14E-10 | 0.003539 |
| 22Feb2011 | 20286 | 659.85  | -29.1808 | 2 K.MIKWISS Splice@chr  | 7.61E-11 | 0.001384 |
| 22Feb2011 | 22003 | 903.47  | -3.68678 | 2 K.IHCHRVG Splice@chr  | 7.16E-11 | 0.001771 |
| 22Feb2011 | 10325 | 717.87  | -22.6191 | 2 K.FKRLNDN chr5@1915   | 1.31E-10 | 0.003646 |
| 22Feb2011 | 6835  | 549.97  | -26.3126 | 3 _..IGKSK+14 chr5@1858 | 5.36E-10 | 0.008901 |
| 22Feb2011 | 15693 | 800.09  | -12.8109 | 3 K.DK+14.01 chr4@1671  | 3.88E-10 | 0.009213 |
| 22Feb2011 | 17540 | 671.83  | 1.091828 | 2 A.MTTMM chr3@1370     | 4.30E-10 | 0.009363 |
| 22Feb2011 | 2010  | 413.98  | -7.8735  | 4 _..KLAQK+1 chr5@1444  | 7.69E-11 | 0.001848 |
| 22Feb2011 | 11227 | 700.93  | -5.97611 | 2 K.IITHKK+1 Splice@chr | 5.93E-10 | 0.009909 |
| 22Feb2011 | 8167  | 501.3   | 5.009152 | 2 K.KVCPKGR chrX@8368   | 2.72E-10 | 0.006039 |
| 22Feb2011 | 23840 | 913.96  | -21.5822 | 4 K.IMDAIVS Splice@chr  | 2.66E-10 | 0.006724 |
| 22Feb2011 | 27044 | 1086.57 | -23.8386 | 3 K.KSCSPK! chr2@3558   | 2.13E-10 | 0.004098 |
| 22Feb2011 | 3438  | 456.24  | -15.9993 | 3 R.ITQMVQI Splice@chr  | 4.20E-10 | 0.008174 |
| 22Feb2011 | 4062  | 456.24  | -15.9993 | 3 R.ITQMVQI Splice@chr  | 1.49E-10 | 0.004231 |
| 22Feb2011 | 7069  | 543.96  | -28.5522 | 3 K.KTSVM+1 chr1@2661   | 3.29E-10 | 0.007432 |
| 22Feb2011 | 1143  | 453.21  | -3.23935 | 2 R.CTPSTPSI chr3@1334  | 3.12E-10 | 0.006717 |
| 22Feb2011 | 1176  | 453.21  | -3.23935 | 2 R.CTPSTPSI chr3@1334  | 3.24E-10 | 0.00718  |

|           |       |         |          |                         |          |          |
|-----------|-------|---------|----------|-------------------------|----------|----------|
| 22Feb2011 | 778   | 453.21  | -3.23935 | 2 R.CTPSTPSI chr3@1334  | 4.35E-10 | 0.009363 |
| 22Feb2011 | 801   | 453.21  | -3.23935 | 2 R.CTPSTPSI chr3@1334  | 1.94E-10 | 0.003821 |
| 22Feb2011 | 726   | 453.21  | -3.23935 | 2 R.CTPSTPSI chr3@1334  | 3.16E-11 | 5.28E-04 |
| 22Feb2011 | 2045  | 410.22  | -0.29831 | 2 R.QSISTAGI chrX@1489  | 1.52E-10 | 0.003574 |
| 22Feb2011 | 26357 | 610     | 7.85637  | 3 K.QQLYK+1 chr3@1279   | 4.92E-10 | 0.009362 |
| 22Feb2011 | 12876 | 862.46  | 18.46915 | 2 K.ECSIESAL chr4@1390  | 2.81E-10 | 0.006285 |
| 22Feb2011 | 13739 | 862.45  | 6.842524 | 2 K.ECSIESAL chr4@1390  | 3.75E-10 | 0.008188 |
| 22Feb2011 | 6534  | 474.5   | -29.2425 | 4 K.QIQSNTK chrX@7261   | 2.21E-10 | 0.004802 |
| 22Feb2011 | 5041  | 617.36  | -14.7154 | 2 R.K+14.016 chr4@5155  | 2.94E-10 | 0.007209 |
| 22Feb2011 | 26566 | 1092.06 | -8.47799 | 2 _NFWKK+ chr3@2114     | 1.14E-10 | 0.002509 |
| 22Feb2011 | 11260 | 529.98  | -21.6149 | 3 K.KNPQKV chr1@3688    | 5.33E-10 | 0.009556 |
| 22Feb2011 | 21074 | 780.9   | -4.4232  | 2 K.KTEVESE chrX@8129   | 4.36E-10 | 0.009597 |
| 22Feb2011 | 21504 | 780.9   | -4.4232  | 2 K.KTEVESE chrX@8129   | 5.04E-10 | 0.009211 |
| 22Feb2011 | 18135 | 869.99  | -20.5792 | 2 G.WDAVLG Splice@chr   | 1.19E-10 | 0.003909 |
| 22Feb2011 | 5223  | 550.81  | -22.2945 | 4 R.VAVMGK chrX@6930    | 2.62E-10 | 0.004926 |
| 22Feb2011 | 3721  | 461.57  | -17.3713 | 3 R.M+15.99 gi 3929184  | 4.26E-10 | 0.006983 |
| 22Feb2011 | 19215 | 663.36  | -28.1837 | 4 K.FRQVADL chr5@5129   | 2.32E-10 | 0.006518 |
| 22Feb2011 | 19454 | 578.31  | -16.3518 | 3 K.INFFSNS chr5@8530   | 2.85E-10 | 0.007052 |
| 22Feb2011 | 19823 | 578.31  | -16.3518 | 3 K.INFFSNS chr5@8530   | 1.79E-10 | 0.004448 |
| 22Feb2011 | 490   | 501.76  | 1.462646 | 2 _IADIEAEN chrX@1571   | 1.93E-10 | 0.003482 |
| 22Feb2011 | 417   | 501.76  | 1.462646 | 2 _IADIEAEN chrX@1571   | 1.51E-10 | 0.003172 |
| 22Feb2011 | 458   | 501.76  | 1.462646 | 2 _IADIEAEN chrX@1571   | 3.49E-10 | 0.007491 |
| 22Feb2011 | 373   | 501.76  | 1.462646 | 2 _IADIEAEN chrX@1571   | 4.14E-10 | 0.008309 |
| 22Feb2011 | 17857 | 923.49  | -28.8343 | 3 K.IACPLANI chr3@8403  | 2.60E-10 | 0.005964 |
| 22Feb2011 | 18477 | 737.77  | -27.0292 | 5 R.EHSSSSL chr5@8572   | 2.90E-10 | 0.007103 |
| 22Feb2011 | 3116  | 517.27  | -14.4944 | 2 K.IDAVERS chr5@6972   | 5.23E-10 | 0.009439 |
| 22Feb2011 | 14267 | 581.81  | 16.49904 | 2 _DLEICPLF chr5@2063   | 2.72E-10 | 0.006036 |
| 22Feb2011 | 14128 | 581.81  | 16.49904 | 2 _DLEICPLF chr5@2063   | 1.40E-10 | 0.003283 |
| 22Feb2011 | 12852 | 581.81  | 16.49904 | 2 _DLEICPLF chr5@2063   | 4.37E-10 | 0.009597 |
| 22Feb2011 | 13844 | 581.81  | 16.49904 | 2 _DLEICPLF chr5@2063   | 1.64E-10 | 0.003395 |
| 22Feb2011 | 14902 | 581.81  | 16.49904 | 2 _DLEICPLF chr5@2063   | 4.64E-10 | 0.009024 |
| 22Feb2011 | 22272 | 996.47  | 6.540137 | 3 K.KCCQYFC chr3@1533   | 9.93E-11 | 0.001962 |
| 22Feb2011 | 331   | 503.59  | 18.29777 | 3 R.RWWRM Splice@chr    | 2.14E-10 | 0.004495 |
| 22Feb2011 | 21917 | 1010.56 | -26.1079 | 4 _LRIPKGN chrX@6812    | 3.23E-11 | 7.55E-04 |
| 22Feb2011 | 18468 | 674.36  | -1.96386 | 3 K.HGTHSPT chr5@6512   | 2.39E-11 | 5.27E-04 |
| 22Feb2011 | 6096  | 434.74  | 16.06349 | 2 R.HSNTPRR chr3@1591   | 1.83E-10 | 0.003449 |
| 22Feb2011 | 15540 | 703.38  | 27.57658 | 3 R.SQLENSV Splice@chr  | 3.76E-10 | 0.006891 |
| 22Feb2011 | 4542  | 507.8   | -6.56363 | 2 R.IATPLVSV chr4@1578  | 3.33E-10 | 0.00623  |
| 22Feb2011 | 9569  | 775.41  | -18.8366 | 2 H.FSKIELMI chr4@4997  | 3.02E-10 | 0.007545 |
| 22Feb2011 | 25178 | 763.43  | 1.162961 | 2 R.SEASQHF chr2@1010   | 5.25E-10 | 0.008676 |
| 22Feb2011 | 21063 | 797.37  | -26.4179 | 2 K.NVTFSSA chr5@1128   | 1.16E-10 | 0.002365 |
| 22Feb2011 | 9927  | 921.48  | -11.4712 | 1 R.GRQAGG chr4@1715    | 9.47E-11 | 0.002962 |
| 22Feb2011 | 26968 | 1082.23 | -10.4457 | 3 K.DRKK+14 chrX@2595   | 1.48E-11 | 3.19E-04 |
| 22Feb2011 | 20224 | 859.44  | 18.34432 | 2 R.TWM+15 chr2@4752    | 4.23E-10 | 0.006287 |
| 22Feb2011 | 24431 | 893.13  | -20.2346 | 3 K.SLQDIIAI Splice@chr | 1.86E-10 | 0.004687 |
| 22Feb2011 | 20770 | 838.68  | 5.047927 | 4 _TQNCCLK+ chr4@1989   | 3.49E-10 | 0.005254 |
| 22Feb2011 | 7871  | 573.81  | -16.6884 | 2 R.NSVRKSE chrX@1100   | 3.71E-10 | 0.007402 |

|           |       |         |          |                         |          |          |
|-----------|-------|---------|----------|-------------------------|----------|----------|
| 22Feb2011 | 3348  | 468.92  | 22.69733 | 3 _TDHQTN chrX@8014     | 3.23E-10 | 0.006948 |
| 22Feb2011 | 9620  | 480.27  | 23.43338 | 2 K.LVMVGG chr5@1457    | 4.02E-11 | 0.001054 |
| 22Feb2011 | 10492 | 758.4   | 26.83584 | 1 R.PVANSDF chr2@4736   | 5.53E-10 | 0.009215 |
| 22Feb2011 | 11091 | 758.4   | 26.83584 | 1 R.PVANSDF chr2@4736   | 3.55E-10 | 0.007491 |
| 22Feb2011 | 16438 | 1016.59 | -9.01472 | 1 K.ELELISGK chr5@1597  | 2.56E-10 | 0.006202 |
| 22Feb2011 | 1089  | 427.2   | 5.442025 | 3 R.MGQEGN chr2@7892    | 4.56E-10 | 0.008521 |
| 22Feb2011 | 23726 | 1083.22 | -5.77254 | 3 R.FPNVSTC chrX@1531   | 1.71E-10 | 0.003513 |
| 22Feb2011 | 16209 | 803.4   | -4.908   | 2 R.QVSLSSS Splice@chr  | 9.59E-11 | 0.001465 |
| 22Feb2011 | 13854 | 511.29  | -7.30127 | 2 R.SIAVTM+ Splice@chr  | 2.33E-10 | 0.0058   |
| 22Feb2011 | 14433 | 511.28  | -26.9366 | 2 R.SIAVTM+ Splice@chr  | 3.46E-10 | 0.00749  |
| 22Feb2011 | 28049 | 725.37  | -18.4527 | 1 R.GSLYGTK chr2@8355   | 4.03E-10 | 0.008    |
| 22Feb2011 | 20093 | 637.84  | 14.82114 | 2 _SK+14.01 chrX@1345   | 2.50E-10 | 0.006409 |
| 22Feb2011 | 17447 | 812.4   | -13.7202 | 3 _LSCKNNF chr5@1324    | 2.27E-10 | 0.004764 |
| 22Feb2011 | 16315 | 812.4   | -13.7202 | 3 _LSCKNNF chr5@1324    | 5.21E-11 | 0.001827 |
| 22Feb2011 | 17986 | 812.4   | -13.7202 | 3 _LSCKNNF chr5@1324    | 4.38E-10 | 0.009868 |
| 22Feb2011 | 17888 | 812.4   | -13.7202 | 3 _LSCKNNF chr5@1324    | 8.51E-11 | 0.001895 |
| 22Feb2011 | 17832 | 812.4   | -13.7202 | 3 _LSCKNNF chr5@1324    | 8.61E-11 | 0.001895 |
| 22Feb2011 | 16473 | 812.4   | -13.7202 | 3 _LSCKNNF chr5@1324    | 1.15E-10 | 0.002673 |
| 22Feb2011 | 23455 | 777.08  | 13.6322  | 3 Q.EPVEDGI Splice@chr  | 1.52E-10 | 0.005311 |
| 22Feb2011 | 895   | 572.85  | -18.0378 | 2 K.KIEICLKL chr5@8194  | 3.32E-10 | 0.007511 |
| 22Feb2011 | 6155  | 570.33  | -18.2926 | 2 R.KNGKIGE chr5@2088   | 1.31E-11 | 3.94E-04 |
| 22Feb2011 | 24334 | 1040.19 | -1.93815 | 3 R.DNMLEV Splice@chr   | 4.39E-10 | 0.00737  |
| 22Feb2011 | 24137 | 1040.19 | -1.93815 | 3 R.DNMLEV Splice@chr   | 1.83E-11 | 6.96E-04 |
| 22Feb2011 | 24818 | 1039.86 | 2.428442 | 3 R.DNMLEV Splice@chr   | 2.85E-11 | 7.15E-04 |
| 22Feb2011 | 17178 | 602.3   | 3.420495 | 3 R.M+15.99 Splice@chr  | 1.54E-10 | 0.005594 |
| 22Feb2011 | 18667 | 794.91  | -0.69192 | 2 R.MFLAAH chr2@7397    | 1.81E-10 | 0.00252  |
| 22Feb2011 | 19699 | 794.91  | -0.69192 | 2 R.MFLAAH chr2@7397    | 1.70E-10 | 0.003482 |
| 22Feb2011 | 18247 | 957.53  | -8.458   | 2 R.QNYFLVC chr3@6107   | 3.98E-10 | 0.008649 |
| 24Mar2011 | 13936 | 870.52  | 13.07833 | 4 K.LTFK+14 chr4@1517   | 4.08E-10 | 0.005488 |
| 22Feb2011 | 5621  | 412.75  | 25.60523 | 2 R.VSSGFAK Splice@chr  | 1.96E-10 | 0.004269 |
| 22Feb2011 | 963   | 568.76  | 21.68341 | 2 R.ACNEAG chr3@3054    | 2.49E-10 | 0.004691 |
| 22Feb2011 | 1195  | 568.76  | 21.68341 | 2 R.ACNEAG chr3@3054    | 2.84E-10 | 0.005819 |
| 22Feb2011 | 1098  | 568.76  | 21.68341 | 2 R.ACNEAG chr3@3054    | 3.60E-10 | 0.007563 |
| 22Feb2011 | 22863 | 715.42  | 2.07326  | 4 K.LLSKILFPI chr2@1707 | 2.18E-10 | 0.004705 |
| 22Feb2011 | 24631 | 702.71  | -18.7666 | 3 K.KQTSKIQ Splice@chr  | 1.29E-10 | 0.00269  |
| 22Feb2011 | 28118 | 974.5   | -11.1003 | 3 _ENEMIRC Splice@chr   | 1.40E-10 | 0.00369  |
| 22Feb2011 | 9912  | 565.27  | -13.2603 | 2 R.NGEDHK chr4@1726    | 8.40E-11 | 0.00183  |
| 22Feb2011 | 20398 | 686.35  | -23.3727 | 3 _SLFEAVP chr2@7596    | 2.74E-10 | 0.005994 |
| 22Feb2011 | 19847 | 686.35  | -23.3727 | 3 _SLFEAVP chr2@7596    | 4.74E-10 | 0.008741 |
| 22Feb2011 | 5141  | 476.75  | -27.6737 | 2 K.FEAVTGS chr5@1141   | 2.33E-10 | 0.005552 |
| 22Feb2011 | 12202 | 525.3   | 6.003168 | 2 R.VNCTVTV chr5@9512   | 5.89E-11 | 9.17E-04 |
| 22Feb2011 | 13104 | 525.3   | 6.003168 | 2 R.VNCTVTV chr5@9512   | 1.79E-10 | 0.004385 |
| 22Feb2011 | 20288 | 887.49  | -29.4484 | 2 _NFRQIGIL chr5@3054   | 1.82E-10 | 0.004055 |
| 22Feb2011 | 19980 | 887.49  | -29.4484 | 2 _NFRQIGIL chr5@3054   | 2.51E-10 | 0.00432  |
| 22Feb2011 | 19926 | 886.99  | -27.5552 | 2 _NFRQIGIL chr5@3054   | 5.78E-10 | 0.009624 |
| 22Feb2011 | 19369 | 887.49  | -29.4484 | 2 _NFRQIGIL chr5@3054   | 6.80E-11 | 0.002676 |
| 22Feb2011 | 16792 | 861.47  | 2.127994 | 1 _DLGETGK Splice@chr   | 1.54E-10 | 0.003574 |

|           |       |         |          |                         |          |          |
|-----------|-------|---------|----------|-------------------------|----------|----------|
| 22Feb2011 | 14352 | 506.3   | 5.440678 | 3 R.PFFVLK+ chr5@1654   | 1.27E-10 | 0.004479 |
| 22Feb2011 | 21161 | 717.71  | -23.1447 | 3 R.STTSK+14 Splice@chr | 1.68E-10 | 0.002865 |
| 22Feb2011 | 18957 | 529.3   | 20.18016 | 3 R.RNSDINE Splice@chr  | 3.11E-10 | 0.006335 |
| 22Feb2011 | 26419 | 476.27  | 24.10782 | 2 _YTPGGTR chrX@1281    | 2.54E-10 | 0.005688 |
| 22Feb2011 | 16563 | 618.07  | -24.9099 | 4 _FTEITNEV Splice@chr  | 1.83E-10 | 0.004999 |
| 22Feb2011 | 12311 | 465.5   | 0.231233 | 4 _WVWLFC Splice@chr    | 4.43E-10 | 0.006687 |
| 22Feb2011 | 3887  | 406.76  | 27.79114 | 2 _LLGMLHK Splice@chr   | 5.47E-10 | 0.009061 |
| 22Feb2011 | 18033 | 823.89  | -22.7704 | 4 R.TTGVLVD Splice@chr  | 5.33E-11 | 7.61E-04 |
| 22Feb2011 | 16894 | 531.78  | 19.20422 | 2 R.EIEGDAT chr5@4004   | 3.75E-10 | 0.009517 |
| 22Feb2011 | 16723 | 531.78  | 19.20422 | 2 R.EIEGDAT chr5@4004   | 2.47E-10 | 0.005672 |
| 22Feb2011 | 2361  | 533.26  | -12.796  | 2 S.ETLSDSIS chr4@9826  | 3.96E-10 | 0.009302 |
| 22Feb2011 | 16875 | 835.45  | -24.784  | 4 L.MQQNAS Splice@chr   | 2.60E-10 | 0.005912 |
| 22Feb2011 | 9440  | 503.3   | 18.77415 | 2 R.KFGLNGE chr5@2928   | 3.74E-10 | 0.007494 |
| 22Feb2011 | 13720 | 669.34  | 26.21084 | 2 K.KVMSAT chr5@1752    | 3.67E-10 | 0.007877 |
| 22Feb2011 | 1801  | 476.26  | -24.4861 | 3 R.FM+15.9 chr1@1666   | 2.46E-10 | 0.004642 |
| 22Feb2011 | 15575 | 745.92  | 5.45389  | 2 K.PVFFYSF chr4@4301   | 9.05E-11 | 0.003089 |
| 22Feb2011 | 5138  | 432.22  | -28.6926 | 2 R.VFAQQG Splice@chr   | 2.88E-10 | 0.007146 |
| 22Feb2011 | 21457 | 917.46  | -10.7747 | 4 R.DM+15.9 chr1@7152   | 1.90E-10 | 0.004754 |
| 22Feb2011 | 10007 | 636.85  | -20.8924 | 2 K.NSKK+14 chr4@7303   | 2.29E-10 | 0.005064 |
| 22Feb2011 | 23894 | 876.46  | 9.781521 | 4 K.IVLTGGP chr5@3697   | 3.97E-10 | 0.008034 |
| 22Feb2011 | 16751 | 607.33  | -6.47844 | 3 K.SLSSFNM Splice@chr  | 1.54E-10 | 0.003763 |
| 22Feb2011 | 3112  | 531.29  | -5.29454 | 2 _QKMEEKI chr5@1320    | 4.84E-10 | 0.009741 |
| 22Feb2011 | 16883 | 621.3   | -20.9242 | 2 _VARAGSC chrX@1304    | 5.67E-11 | 0.001982 |
| 22Feb2011 | 4536  | 439.24  | 21.65786 | 2 R.FEGALGC chrX@9204   | 1.29E-10 | 0.003169 |
| 22Feb2011 | 6281  | 628.86  | 8.125521 | 2 R.LLMHPGI chr3@5211   | 1.56E-10 | 0.004366 |
| 22Feb2011 | 22355 | 914.02  | -25.9838 | 2 V.LVTTSWL Splice@chr  | 1.33E-10 | 0.002755 |
| 22Feb2011 | 22155 | 883.45  | 12.01737 | 3 K.KCIQWQ Splice@chr   | 7.32E-11 | 0.001443 |
| 22Feb2011 | 27449 | 959.85  | 0.424367 | 3 R.SNSREEK Splice@chr  | 3.54E-10 | 0.008661 |
| 22Feb2011 | 5875  | 539.29  | -7.99931 | 2 L.M+15.99 Splice@chr  | 5.32E-10 | 0.009189 |
| 22Feb2011 | 18646 | 669.37  | -5.05304 | 3 R.SHKVKRL chr5@6358   | 2.53E-11 | 0.001081 |
| 22Feb2011 | 4373  | 491.92  | -20.3607 | 3 R.DLGSK+1 chr2@1249   | 5.85E-10 | 0.0099   |
| 22Feb2011 | 10551 | 637.83  | 25.11158 | 2 A.ENMNKV chr1@9767    | 4.80E-10 | 0.009079 |
| 22Feb2011 | 10914 | 637.83  | 25.11158 | 2 A.ENMNKV chr1@9767    | 1.29E-10 | 0.002753 |
| 22Feb2011 | 25245 | 755.39  | 1.215101 | 3 K.SYFFFLFS chr5@2033  | 3.26E-10 | 0.007126 |
| 22Feb2011 | 3260  | 583.32  | 14.67434 | 2 _K+14.016 chr4@1254   | 8.16E-11 | 0.001435 |
| 22Feb2011 | 22257 | 805.41  | 0.075876 | 2 K.EK+14.01 chrX@2953  | 2.85E-10 | 0.006964 |
| 22Feb2011 | 8590  | 824.39  | -27.553  | 2 R.FLDVKFFI chr3@4176  | 5.16E-10 | 0.009886 |
| 22Feb2011 | 22776 | 1078.07 | -19.3598 | 2 K.KCIDILNS chr3@7493  | 3.63E-10 | 0.005396 |
| 22Feb2011 | 26050 | 631.03  | 28.59608 | 3 R.SSLQCLLT chr5@1500  | 2.45E-10 | 0.00493  |
| 22Feb2011 | 26696 | 748.36  | -17.7883 | 4 R.LNMHRE chr5@1260    | 7.24E-11 | 0.002191 |
| 22Feb2011 | 85    | 509.27  | 20.11481 | 2 R.KYAENHC chr3@1103   | 1.34E-10 | 0.003487 |
| 22Feb2011 | 25709 | 996.47  | -11.6085 | 3 R.SFK+14.0 Splice@chr | 4.89E-10 | 0.007246 |
| 22Feb2011 | 23375 | 996.47  | -11.6085 | 3 R.SFK+14.0 Splice@chr | 2.91E-10 | 0.007511 |
| 22Feb2011 | 26648 | 996.8   | -16.0836 | 3 R.SFK+14.0 Splice@chr | 8.79E-11 | 0.002611 |
| 22Feb2011 | 26571 | 996.8   | -16.0836 | 3 R.SFK+14.0 Splice@chr | 2.41E-10 | 0.005623 |
| 22Feb2011 | 24670 | 996.47  | -11.6085 | 3 R.SFK+14.0 Splice@chr | 4.11E-10 | 0.008369 |
| 22Feb2011 | 27256 | 996.8   | -16.0836 | 3 R.SFK+14.0 Splice@chr | 4.28E-11 | 0.001203 |

|           |       |         |          |                         |          |          |
|-----------|-------|---------|----------|-------------------------|----------|----------|
| 22Feb2011 | 23635 | 1110    | -17.9416 | 2 R.EFQFFQK chr2@1412   | 3.72E-10 | 0.006941 |
| 22Feb2011 | 4713  | 537.79  | 4.434539 | 4 K.RSDCAPE chrX@5476   | 2.23E-10 | 0.00527  |
| 22Feb2011 | 13623 | 801.93  | -2.74341 | 2 _ILYFETKM Splice@chr  | 1.31E-10 | 0.002315 |
| 22Feb2011 | 12556 | 565.32  | 2.112875 | 2 R.KPLGGSE chr1@1339   | 3.60E-11 | 9.24E-04 |
| 22Feb2011 | 22101 | 918.24  | -0.38214 | 4 K.WLKMGCC chr4@9610   | 1.06E-10 | 0.003297 |
| 22Feb2011 | 23201 | 918.24  | -0.38214 | 4 K.WLKMGCC chr4@9610   | 3.75E-10 | 0.009517 |
| 22Feb2011 | 3638  | 400.75  | -8.93207 | 2 K.IISVAAAR chr4@5684  | 3.76E-10 | 0.007532 |
| 22Feb2011 | 1989  | 572.34  | 3.797676 | 2 R.TLGTGLR chrX@1517   | 5.95E-10 | 0.009971 |
| 22Feb2011 | 5338  | 485.73  | -25.7932 | 4 R.YSGNYFN chrX@1466   | 1.30E-10 | 0.003646 |
| 22Feb2011 | 18285 | 918.85  | -28.0045 | 3 I.SATIIINLK chrX@1059 | 3.17E-10 | 0.009047 |
| 24Mar2011 | 9703  | 729.88  | -18.0564 | 2 R.KK+14.01 chr3@4332  | 1.34E-10 | 0.001476 |
| 22Feb2011 | 22976 | 1048.59 | -18.7991 | 3 K.KEDK+14 chr2@4431   | 3.84E-10 | 0.009664 |
| 22Feb2011 | 5066  | 416.22  | -0.29399 | 2 R.NAAADTI chr4@1432   | 5.17E-10 | 0.009556 |
| 22Feb2011 | 5181  | 416.21  | -24.4016 | 2 R.NAAADTI chr4@1432   | 6.63E-11 | 0.001878 |
| 22Feb2011 | 4925  | 416.21  | -24.4016 | 2 R.NAAADTI chr4@1432   | 2.02E-10 | 0.004006 |
| 22Feb2011 | 4499  | 416.21  | -24.4016 | 2 R.NAAADTI chr4@1432   | 2.21E-10 | 0.0054   |
| 22Feb2011 | 4612  | 416.21  | -24.4016 | 2 R.NAAADTI chr4@1432   | 1.99E-10 | 0.005632 |
| 22Feb2011 | 5213  | 416.21  | -24.4016 | 2 R.NAAADTI chr4@1432   | 2.13E-10 | 0.004907 |
| 22Feb2011 | 5426  | 416.21  | -24.4016 | 2 R.NAAADTI chr4@1432   | 6.41E-11 | 0.002319 |
| 22Feb2011 | 11517 | 687.38  | 4.268384 | 2 K.KMLPDSE Splice@chr  | 1.13E-10 | 0.002673 |
| 22Feb2011 | 20203 | 996.87  | 15.63485 | 3 K.STKTVLIK chr4@6084  | 4.65E-10 | 0.009905 |
| 22Feb2011 | 1596  | 478.26  | 0.831277 | 2 R.APHGFA5 chr4@1659   | 5.51E-10 | 0.009215 |
| 22Feb2011 | 18391 | 712.88  | 25.32474 | 4 R.MGKNEE chr1@2779    | 2.39E-10 | 0.005966 |
| 22Feb2011 | 19327 | 859.44  | -25.2181 | 2 R.SSWHSLA chr1@4648   | 1.13E-10 | 0.001897 |
| 22Feb2011 | 16792 | 720.09  | -7.44349 | 3 R.RRM+15. chr3@1358   | 1.85E-10 | 0.004775 |
| 22Feb2011 | 16662 | 662.05  | -3.75481 | 3 K.RLLSPILL chr3@1038  | 5.72E-11 | 0.001878 |
| 22Feb2011 | 6628  | 452.23  | 9.278522 | 2 K.MNGNEII chr1@5168   | 3.71E-10 | 0.007494 |
| 22Feb2011 | 22306 | 853.8   | -21.2636 | 3 K.SKTRLNV chr3@6045   | 1.24E-10 | 0.003361 |
| 22Feb2011 | 2378  | 530.26  | -21.4497 | 3 K.LSSAGGD chr1@1458   | 4.97E-10 | 0.009463 |
| 22Feb2011 | 10600 | 587.71  | -23.5386 | 5 _HK+14.01 Splice@chr  | 1.76E-10 | 0.004607 |
| 22Feb2011 | 241   | 450.25  | 6.249713 | 4 K.MCEK+14 chr2@1000   | 1.65E-10 | 0.00356  |
| 22Feb2011 | 11320 | 546.05  | 20.4196  | 4 R.KVSVAFA chr5@7595   | 4.57E-10 | 0.009617 |
| 22Feb2011 | 10783 | 747.36  | -20.1987 | 2 _VPISGFNI Splice@chr  | 1.65E-10 | 0.005007 |
| 22Feb2011 | 9931  | 747.36  | -20.1987 | 2 _VPISGFNI Splice@chr  | 9.01E-11 | 0.002203 |
| 22Feb2011 | 11321 | 747.37  | -6.78743 | 2 _VPISGFNI Splice@chr  | 1.17E-10 | 0.003909 |
| 22Feb2011 | 19736 | 890.24  | -10.83   | 4 _MYSSK+1 Splice@chr   | 1.61E-10 | 0.003739 |
| 22Feb2011 | 19255 | 890.24  | -10.83   | 4 _MYSSK+1 Splice@chr   | 2.33E-10 | 0.005444 |
| 22Feb2011 | 23263 | 985.56  | -8.01767 | 3 R.K+14.016 chrX@1171  | 6.29E-10 | 0.008955 |
| 22Feb2011 | 6495  | 679.34  | -18.9525 | 2 _K+14.016 chr2@1200   | 2.26E-10 | 0.006518 |
| 22Feb2011 | 20253 | 659.36  | -2.93618 | 3 _RFFLNFSI chr3@1157   | 3.66E-10 | 0.009368 |
| 22Feb2011 | 8461  | 587.35  | 5.367332 | 2 _NLLMTKS chr4@5998    | 8.94E-11 | 0.002477 |
| 22Feb2011 | 25742 | 818.4   | -19.7126 | 3 K.FEKSFPC chr3@2387   | 3.81E-10 | 0.00768  |
| 22Feb2011 | 16123 | 660.34  | -15.6751 | 3 K.YSYSPFLL chrX@5076  | 3.74E-10 | 0.005396 |
| 22Feb2011 | 16114 | 736.36  | -27.1993 | 2 R.KM+15.9 Splice@chr  | 1.89E-10 | 0.00431  |
| 22Feb2011 | 4814  | 570.64  | 28.19863 | 3 K.FEK+14.0 chr1@5714  | 7.84E-11 | 0.001435 |
| 22Feb2011 | 22130 | 1035.56 | -0.70796 | 2 R.SMPVK+1 chr3@1685   | 1.33E-10 | 0.002925 |
| 22Feb2011 | 9025  | 466.27  | 3.08848  | 2 _EPTTTILR Splice@chr  | 3.88E-10 | 0.006369 |

|           |       |         |          |                          |          |          |
|-----------|-------|---------|----------|--------------------------|----------|----------|
| 22Feb2011 | 3594  | 552.3   | 23.32879 | 2 R.EEDLENIL chr4@6504   | 3.26E-10 | 0.007333 |
| 22Feb2011 | 3555  | 468.58  | -24.2792 | 3 K.CLK+14.0 chrX@3566   | 4.80E-10 | 0.009015 |
| 22Feb2011 | 1853  | 431.72  | 22.24858 | 2 R.GASDNSF chr2@1466    | 2.46E-10 | 0.007419 |
| 22Feb2011 | 1911  | 431.72  | 22.24858 | 2 R.GASDNSF chr2@1466    | 2.16E-10 | 0.005064 |
| 22Feb2011 | 12401 | 775.43  | -21.4369 | 1 K.PTPVHPK chrX@1640    | 5.56E-11 | 9.17E-04 |
| 22Feb2011 | 24438 | 738.75  | -17.1873 | 3 K.M+15.99 chrX@2946    | 1.37E-10 | 0.002016 |
| 22Feb2011 | 24128 | 738.75  | -17.1873 | 3 K.M+15.99 chrX@2946    | 5.08E-10 | 0.007385 |
| 22Feb2011 | 25898 | 738.76  | -3.61325 | 3 K.M+15.99 chrX@2946    | 4.69E-10 | 0.008933 |
| 22Feb2011 | 26261 | 738.75  | -17.1873 | 3 K.M+15.99 chrX@2946    | 3.57E-11 | 0.001116 |
| 22Feb2011 | 24192 | 738.75  | -17.1873 | 3 K.M+15.99 chrX@2946    | 3.73E-10 | 0.008471 |
| 22Feb2011 | 26794 | 738.75  | -17.1873 | 3 K.M+15.99 chrX@2946    | 4.40E-10 | 0.008787 |
| 22Feb2011 | 26196 | 738.75  | -17.1873 | 3 K.M+15.99 chrX@2946    | 2.08E-10 | 0.004121 |
| 22Feb2011 | 25150 | 738.75  | -17.1873 | 3 K.M+15.99 chrX@2946    | 1.06E-10 | 0.00213  |
| 22Feb2011 | 25112 | 738.42  | -11.1462 | 3 K.M+15.99 chrX@2946    | 4.72E-10 | 0.008741 |
| 22Feb2011 | 25189 | 738.75  | -17.1873 | 3 K.M+15.99 chrX@2946    | 2.75E-10 | 0.004884 |
| 22Feb2011 | 26798 | 738.75  | -17.1873 | 3 K.M+15.99 chrX@2946    | 5.02E-10 | 0.009143 |
| 22Feb2011 | 26841 | 738.75  | -17.1873 | 3 K.M+15.99 chrX@2946    | 5.91E-10 | 0.009736 |
| 22Feb2011 | 25959 | 738.75  | -17.1873 | 3 K.M+15.99 chrX@2946    | 3.28E-10 | 0.007035 |
| 22Feb2011 | 25061 | 738.75  | -17.1873 | 3 K.M+15.99 chrX@2946    | 5.08E-10 | 0.009211 |
| 22Feb2011 | 25741 | 738.75  | -17.1873 | 3 K.M+15.99 chrX@2946    | 1.46E-10 | 0.004201 |
| 22Feb2011 | 25431 | 738.75  | -17.1873 | 3 K.M+15.99 chrX@2946    | 3.44E-10 | 0.008732 |
| 22Feb2011 | 25384 | 738.75  | -17.1873 | 3 K.M+15.99 chrX@2946    | 3.14E-10 | 0.00834  |
| 22Feb2011 | 25221 | 738.75  | -17.1873 | 3 K.M+15.99 chrX@2946    | 1.22E-10 | 0.002215 |
| 22Feb2011 | 26619 | 738.42  | -11.1462 | 3 K.M+15.99 chrX@2946    | 1.26E-10 | 0.003077 |
| 22Feb2011 | 26658 | 738.75  | -17.1873 | 3 K.M+15.99 chrX@2946    | 2.26E-10 | 0.005586 |
| 22Feb2011 | 22434 | 967.79  | 1.705904 | 3 K.AVPFVPI\$ Splice@chr | 4.01E-10 | 0.008809 |
| 22Feb2011 | 17145 | 638.69  | 16.05786 | 3 K.TNRPTNS Splice@chr   | 2.51E-10 | 0.00751  |
| 22Feb2011 | 17617 | 999.5   | -20.6057 | 3 R.NAENIRIS chr1@9640   | 3.05E-10 | 0.004431 |
| 22Feb2011 | 18845 | 999.5   | -20.6057 | 3 R.NAENIRIS chr1@9640   | 9.07E-11 | 0.002193 |
| 22Feb2011 | 18932 | 999.5   | -20.6057 | 3 R.NAENIRIS chr1@9640   | 5.09E-10 | 0.009721 |
| 22Feb2011 | 19213 | 999.5   | -20.6057 | 3 R.NAENIRIS chr1@9640   | 1.80E-10 | 0.003642 |
| 22Feb2011 | 24566 | 812.43  | -5.94234 | 4 _MQFLQM Splice@chr     | 7.82E-11 | 0.001215 |
| 22Feb2011 | 22356 | 721.4   | -21.5569 | 3 _K+14.016 chr3@5990    | 2.85E-10 | 0.007269 |
| 22Feb2011 | 4874  | 538.78  | -18.6852 | 2 K.KGWNKE chr5@1027     | 3.11E-10 | 0.006335 |
| 22Feb2011 | 28000 | 715.41  | 8.25187  | 2 R.ARMAGN chr1@1362     | 3.37E-10 | 0.006738 |
| 22Feb2011 | 1232  | 520.26  | -15.8682 | 2 K.WLPTYSN Splice@chr   | 9.09E-11 | 0.00236  |
| 22Feb2011 | 15970 | 542.49  | -13.2371 | 5 R.FLFIFSVI chr5@1400   | 1.26E-10 | 0.002848 |
| 22Feb2011 | 14740 | 646.12  | -17.5798 | 4 K.RTVTKIRI chr5@2267   | 1.30E-10 | 0.003211 |
| 22Feb2011 | 2225  | 545.31  | -20.1838 | 2 K.IKMTENL chr3@5672    | 1.60E-10 | 0.003654 |
| 22Feb2011 | 25948 | 1085.88 | -4.35077 | 3 K.KLIFFSIFE chr3@1234  | 6.35E-11 | 0.001195 |
| 22Feb2011 | 17634 | 779.04  | -9.83207 | 3 L.KVLAGGL Splice@chr   | 2.51E-10 | 0.006728 |
| 22Feb2011 | 20694 | 492.3   | 3.29221  | 2 R.QTGNLPI chr2@1488    | 1.52E-10 | 0.005411 |
| 22Feb2011 | 20380 | 492.3   | 3.29221  | 2 R.QTGNLPI chr2@1488    | 1.96E-10 | 0.004711 |
| 22Feb2011 | 22357 | 863.46  | -20.459  | 3 _QPAMIGI Splice@chr    | 2.70E-10 | 0.006635 |
| 22Feb2011 | 15492 | 571.31  | -2.03342 | 2 _YLFDITLE chr2@1007    | 2.07E-11 | 7.74E-04 |
| 22Feb2011 | 15692 | 803.17  | 25.56632 | 4 R.TTGVVLD Splice@chr   | 1.44E-11 | 3.94E-04 |
| 22Feb2011 | 15929 | 803.42  | 24.52075 | 4 R.TTGVVLD Splice@chr   | 2.71E-10 | 0.005424 |

|           |       |         |          |                         |          |          |
|-----------|-------|---------|----------|-------------------------|----------|----------|
| 22Feb2011 | 16004 | 1070.89 | 23.83594 | 3 R.TTGVLVD Splice@chr  | 1.57E-10 | 0.003172 |
| 22Feb2011 | 15981 | 803.17  | 25.56632 | 4 R.TTGVLVD Splice@chr  | 1.64E-10 | 0.003172 |
| 22Feb2011 | 15652 | 803.17  | 25.56632 | 4 R.TTGVLVD Splice@chr  | 4.18E-10 | 0.008402 |
| 22Feb2011 | 15634 | 803.17  | 25.56632 | 4 R.TTGVLVD Splice@chr  | 7.74E-11 | 0.001935 |
| 22Feb2011 | 14704 | 1051.88 | 25.1969  | 3 R.TTGVLVD Splice@chr  | 3.20E-12 | 2.65E-04 |
| 22Feb2011 | 15934 | 803.17  | 25.56632 | 4 R.TTGVLVD Splice@chr  | 4.62E-11 | 6.97E-04 |
| 22Feb2011 | 7313  | 557.3   | 13.82464 | 2 K.CFKIEGA chr1@935    | 3.18E-11 | 0.001279 |
| 22Feb2011 | 7463  | 557.3   | 13.82464 | 2 K.CFKIEGA chr1@935    | 1.39E-10 | 0.002677 |
| 22Feb2011 | 18532 | 859.77  | -22.0637 | 3 K.EHLIYCLN Splice@chr | 3.77E-11 | 0.001158 |
| 22Feb2011 | 19472 | 859.78  | -10.4034 | 3 K.EHLIYCLN Splice@chr | 3.67E-10 | 0.006839 |
| 22Feb2011 | 19141 | 859.78  | -10.4034 | 3 K.EHLIYCLN Splice@chr | 2.74E-10 | 0.005623 |
| 22Feb2011 | 2480  | 415.24  | 22.88816 | 3 R.NNQATV chr2@600     | 3.83E-10 | 0.007472 |
| 22Feb2011 | 15489 | 904.44  | -26.5726 | 3 R.KNFNNC chr1@134     | 1.54E-10 | 0.003574 |
| 22Feb2011 | 25764 | 751.78  | 10.18927 | 3 K.ESGEK+1. Splice@chr | 1.22E-10 | 0.00411  |
| 22Feb2011 | 22581 | 700.43  | -24.9299 | 2 K.KSKK+14. chr4@164   | 3.73E-10 | 0.006139 |
| 22Feb2011 | 18066 | 776.42  | 0.188912 | 5 R.RTFCDGK Splice@chr  | 1.92E-10 | 0.004793 |
| 22Feb2011 | 25002 | 931.83  | -23.7659 | 3 K.MQNLDL Splice@chr   | 1.00E-10 | 0.002675 |
| 22Feb2011 | 24530 | 931.49  | -29.7356 | 3 K.MQNLDL Splice@chr   | 8.67E-11 | 0.002076 |
| 22Feb2011 | 12777 | 473.57  | -11.6241 | 3 R.SSSHK+1. chr5@195   | 3.98E-10 | 0.007105 |
| 22Feb2011 | 14649 | 640.6   | -12.7872 | 4 K.MLK+14. chr2@352    | 8.33E-11 | 0.002703 |
| 22Feb2011 | 14679 | 640.6   | -12.7872 | 4 K.MLK+14. chr2@352    | 2.12E-10 | 0.004571 |
| 22Feb2011 | 13632 | 640.6   | -12.7872 | 4 K.MLK+14. chr2@352    | 3.53E-10 | 0.009062 |
| 22Feb2011 | 14908 | 640.6   | -12.7872 | 4 K.MLK+14. chr2@352    | 4.89E-10 | 0.00998  |
| 22Feb2011 | 14336 | 640.6   | -12.7872 | 4 K.MLK+14. chr2@352    | 3.49E-10 | 0.007931 |
| 22Feb2011 | 20865 | 897.46  | 17.72505 | 4 _FSVLNM+ Splice@chr   | 2.84E-10 | 0.006285 |
| 22Feb2011 | 22136 | 897.46  | 17.72505 | 4 _FSVLNM+ Splice@chr   | 4.39E-10 | 0.009148 |
| 22Feb2011 | 22001 | 878.48  | -25.0185 | 2 K.K+14.016 chr4@750   | 2.13E-10 | 0.005064 |
| 22Feb2011 | 11765 | 707.38  | 1.641726 | 2 K.YWKNM chr1@523      | 4.15E-10 | 0.008666 |
| 22Feb2011 | 10681 | 523.8   | -28.9528 | 2 R.ARYPAGK chr1@319    | 4.73E-10 | 0.007087 |
| 22Feb2011 | 4581  | 468.74  | 3.980012 | 2 K.TTMSANI chr2@874    | 6.08E-10 | 0.009922 |
| 22Feb2011 | 18400 | 957.86  | 29.29028 | 3 R.SRKSTQG chr1@212    | 1.72E-10 | 0.003323 |
| 22Feb2011 | 13662 | 762.93  | 7.897192 | 2 K.CSKNSQI chr5@374    | 8.94E-11 | 0.001732 |
| 22Feb2011 | 7556  | 505.28  | 5.002852 | 3 K.VIYFSDFP chr4@907   | 2.08E-10 | 0.004871 |
| 22Feb2011 | 21418 | 1134.06 | -14.5441 | 2 K.KM+15.9 chrX@165    | 5.14E-11 | 0.001279 |
| 22Feb2011 | 4874  | 525.77  | -28.7278 | 2 K.SLGWYV Splice@chr   | 3.05E-10 | 0.006645 |
| 22Feb2011 | 18692 | 822.43  | -13.8797 | 4 K.GILK+14. chr4@119   | 3.13E-10 | 0.006659 |
| 22Feb2011 | 108   | 515.24  | -22.0363 | 2 K.QTSHNW chrX@383     | 2.26E-10 | 0.004676 |
| 22Feb2011 | 105   | 515.24  | -22.0363 | 2 K.QTSHNW chrX@383     | 4.23E-10 | 0.00874  |
| 22Feb2011 | 98    | 515.24  | -22.0363 | 2 K.QTSHNW chrX@383     | 2.65E-10 | 0.006135 |
| 22Feb2011 | 27661 | 846.44  | 16.04892 | 1 K.VSYFAM Splice@chr   | 2.95E-11 | 3.94E-04 |
| 22Feb2011 | 13891 | 597.35  | 0.974938 | 2 R.KMIFGNK chr1@452    | 3.55E-10 | 0.008339 |
| 22Feb2011 | 21975 | 772.74  | 10.26062 | 3 Q.DPVEDG Splice@chr   | 2.12E-12 | 1.57E-04 |
| 22Feb2011 | 23211 | 729.4   | -7.52234 | 4 R.KSDTQVF chrX@163    | 4.10E-10 | 0.009308 |
| 22Feb2011 | 16536 | 893.44  | 10.94283 | 3 _M+15.99 chr2@649     | 5.47E-11 | 0.001279 |
| 22Feb2011 | 5143  | 468.24  | -26.1514 | 2 K.FGKLPGC chr1@345    | 4.40E-11 | 0.002233 |
| 22Feb2011 | 480   | 473.59  | -27.9823 | 3 R.AGTTRTS chrX@435    | 2.20E-10 | 0.00521  |
| 22Feb2011 | 17426 | 618.66  | -25.0786 | 3 R.SLFLGEG chr5@185    | 2.23E-10 | 0.0054   |

|           |       |        |          |                         |          |          |
|-----------|-------|--------|----------|-------------------------|----------|----------|
| 22Feb2011 | 11593 | 682.85 | -26.4958 | 2 K.ICTICLKI chr3@3229  | 1.20E-10 | 0.00215  |
| 22Feb2011 | 17819 | 792.93 | -14.4123 | 2 R.SWQELG chr5@3295    | 2.95E-10 | 0.004349 |
| 22Feb2011 | 19228 | 792.93 | -14.4123 | 2 R.SWQELG chr5@3295    | 2.58E-10 | 0.005257 |
| 22Feb2011 | 19477 | 792.93 | -14.4123 | 2 R.SWQELG chr5@3295    | 4.85E-10 | 0.009015 |
| 22Feb2011 | 19234 | 792.93 | -14.4123 | 2 R.SWQELG chr5@3295    | 2.44E-10 | 0.006242 |
| 22Feb2011 | 19142 | 792.93 | -14.4123 | 2 R.SWQELG chr5@3295    | 3.05E-10 | 0.006146 |
| 22Feb2011 | 19857 | 793.43 | -16.5304 | 2 R.SWQELG chr5@3295    | 3.69E-10 | 0.008049 |
| 24Mar2011 | 5886  | 708.34 | 27.18185 | 2 _CSLNGGS chr4@9980    | 6.04E-10 | 0.008008 |
| 22Feb2011 | 10984 | 451.77 | -0.60762 | 2 R.IIICVGAR chr3@9571  | 5.82E-10 | 0.00983  |
| 22Feb2011 | 10445 | 552.28 | -8.45515 | 3 R.SNDRAG chr1@1095    | 3.84E-10 | 0.00751  |
| 22Feb2011 | 20054 | 996.8  | -11.5057 | 3 K.WKTSKM chr3@1297    | 3.85E-10 | 0.00751  |
| 22Feb2011 | 8448  | 665.87 | 3.538643 | 2 K.NSKYALV chr2@6992   | 2.65E-10 | 0.00649  |
| 22Feb2011 | 3689  | 700.82 | 1.308249 | 2 R.TFVSCGT Splice@chr  | 1.01E-13 | 0        |
| 22Feb2011 | 3576  | 700.82 | 1.308249 | 2 R.TFVSCGT Splice@chr  | 3.09E-13 | 0        |
| 22Feb2011 | 3810  | 700.82 | 1.308249 | 2 R.TFVSCGT Splice@chr  | 1.74E-13 | 0        |
| 22Feb2011 | 3633  | 700.82 | 1.308249 | 2 R.TFVSCGT Splice@chr  | 3.83E-13 | 0        |
| 22Feb2011 | 3750  | 700.82 | 1.308249 | 2 R.TFVSCGT Splice@chr  | 9.44E-14 | 0        |
| 22Feb2011 | 5051  | 700.82 | 1.308249 | 2 R.TFVSCGT Splice@chr  | 3.91E-14 | 0        |
| 22Feb2011 | 4996  | 700.82 | 1.308249 | 2 R.TFVSCGT Splice@chr  | 7.60E-13 | 0        |
| 22Feb2011 | 4790  | 700.82 | 1.308249 | 2 R.TFVSCGT Splice@chr  | 6.72E-14 | 0        |
| 22Feb2011 | 4730  | 700.82 | 1.308249 | 2 R.TFVSCGT Splice@chr  | 2.49E-13 | 1.35E-04 |
| 22Feb2011 | 17589 | 715.05 | -16.8458 | 3 R.AK+14.01 chrX@1636  | 2.65E-10 | 0.007571 |
| 22Feb2011 | 18736 | 652.66 | -4.90305 | 3 R.FEK+14.0 chr3@1370  | 1.07E-10 | 0.002276 |
| 22Feb2011 | 13581 | 623.83 | 5.445012 | 2 _M+15.99 chr4@7229    | 4.51E-10 | 0.00838  |
| 22Feb2011 | 21108 | 867.64 | -26.9628 | 4 _GLAIGNG Splice@chr   | 5.27E-13 | 0        |
| 22Feb2011 | 20407 | 820.43 | 16.16364 | 4 R.KSQKEFC chrX@1534   | 1.84E-10 | 0.004699 |
| 22Feb2011 | 15619 | 649.33 | -18.4517 | 2 K.FMTQVKI chrX@1535   | 5.67E-10 | 0.009642 |
| 22Feb2011 | 4427  | 880.4  | 16.58833 | 2 R.ENFNTCT Splice@chr  | 5.39E-11 | 0.001522 |
| 22Feb2011 | 25510 | 853.45 | 3.905791 | 2 V.VYTRAIW chr4@4866   | 3.07E-11 | 0.00125  |
| 22Feb2011 | 21448 | 763.07 | -16.959  | 3 _FFSVGK+ Splice@chr   | 2.98E-10 | 0.008719 |
| 22Feb2011 | 17882 | 762.73 | 3.982386 | 3 K.LTVWWF chr4@1104    | 3.25E-10 | 0.006344 |
| 22Feb2011 | 17320 | 762.73 | 3.982386 | 3 K.LTVWWF chr4@1104    | 2.94E-10 | 0.006756 |
| 22Feb2011 | 18616 | 762.73 | 3.982386 | 3 K.LTVWWF chr4@1104    | 2.02E-10 | 0.004921 |
| 22Feb2011 | 1493  | 526.79 | 14.97512 | 2 K.LDCNFKK chr2@1421   | 4.09E-10 | 0.008098 |
| 22Feb2011 | 1533  | 526.79 | 14.97512 | 2 K.LDCNFKK chr2@1421   | 4.84E-10 | 0.009225 |
| 22Feb2011 | 2621  | 526.79 | 14.97512 | 2 K.LDCNFKK chr2@1421   | 4.29E-10 | 0.009796 |
| 22Feb2011 | 331   | 526.79 | 14.97512 | 2 K.LDCNFKK chr2@1421   | 2.00E-10 | 0.004489 |
| 22Feb2011 | 1149  | 526.79 | 14.97512 | 2 K.LDCNFKK chr2@1421   | 3.04E-10 | 0.006659 |
| 22Feb2011 | 176   | 526.79 | 14.97512 | 2 K.LDCNFKK chr2@1421   | 2.92E-10 | 0.006756 |
| 22Feb2011 | 928   | 526.79 | 14.97512 | 2 K.LDCNFKK chr2@1421   | 2.11E-10 | 0.005051 |
| 22Feb2011 | 959   | 526.79 | 14.97512 | 2 K.LDCNFKK chr2@1421   | 2.32E-10 | 0.006093 |
| 22Feb2011 | 1210  | 526.79 | 14.97512 | 2 K.LDCNFKK chr2@1421   | 2.06E-10 | 0.005883 |
| 22Feb2011 | 1056  | 526.79 | 14.97512 | 2 K.LDCNFKK chr2@1421   | 2.75E-10 | 0.006794 |
| 22Feb2011 | 1030  | 526.79 | 14.97512 | 2 K.LDCNFKK chr2@1421   | 3.85E-10 | 0.009749 |
| 22Feb2011 | 19400 | 884.94 | 1.279359 | 2 R.VEDYGIQ chr5@1146   | 3.33E-10 | 0.00718  |
| 22Feb2011 | 9911  | 613.32 | -27.2118 | 2 R.QVYSFLP chr2@5595   | 3.69E-10 | 0.00816  |
| 22Feb2011 | 28101 | 723.14 | -8.94035 | 4 R.VGVSRIII Splice@chr | 4.80E-10 | 0.009771 |

|           |       |        |          |                          |          |          |
|-----------|-------|--------|----------|--------------------------|----------|----------|
| 22Feb2011 | 7677  | 726.41 | 26.02791 | 3 K.TFK+14.0 Splice@chr  | 4.08E-10 | 0.008294 |
| 22Feb2011 | 17515 | 713.35 | 2.530925 | 2 R.WYSFSST chr4@9759    | 2.87E-10 | 0.005936 |
| 22Feb2011 | 12714 | 679.33 | -7.2677  | 4 R.DTLFNGT chr5@1815    | 1.76E-10 | 0.003975 |
| 22Feb2011 | 11378 | 679.33 | -7.2677  | 4 R.DTLFNGT chr5@1815    | 4.99E-11 | 0.001279 |
| 22Feb2011 | 5109  | 489.6  | -21.236  | 3 K.LILNHGSI Splice@chr  | 2.02E-10 | 0.004043 |
| 22Feb2011 | 17245 | 685.02 | -20.7995 | 3 R.SFK+14.0 chr2@1428   | 4.54E-10 | 0.009696 |
| 22Feb2011 | 1854  | 494.59 | -4.57696 | 3 R.ICMTVCE chrX@1434    | 6.67E-11 | 0.002543 |
| 22Feb2011 | 18640 | 875.48 | 12.53706 | 2 K.RNSHK+1 chrX@8418    | 4.30E-10 | 0.007656 |
| 22Feb2011 | 1296  | 454.72 | 10.37229 | 2 K.M+15.99 Splice@chr   | 2.49E-10 | 0.00561  |
| 22Feb2011 | 1381  | 454.72 | 10.37229 | 2 K.M+15.99 Splice@chr   | 1.90E-10 | 0.00477  |
| 22Feb2011 | 10458 | 872.81 | -15.9441 | 3 R.NEKGRKE Splice@chr   | 2.90E-10 | 0.00472  |
| 22Feb2011 | 10340 | 872.81 | -15.9441 | 3 R.NEKGRKE Splice@chr   | 4.73E-10 | 0.009633 |
| 22Feb2011 | 24896 | 964.17 | -11.8956 | 3 K.DQKSAAI Splice@chr   | 9.37E-11 | 0.002213 |
| 22Feb2011 | 13665 | 686.35 | -22.1847 | 3 K.M+15.99 chr5@1362    | 3.24E-10 | 0.008329 |
| 22Feb2011 | 1940  | 406.89 | 9.684058 | 3 R.LYFQLVC chr3@4438    | 1.45E-10 | 0.003957 |
| 22Feb2011 | 1843  | 406.89 | 9.684058 | 3 R.LYFQLVC chr3@4438    | 6.84E-11 | 0.002319 |
| 22Feb2011 | 22488 | 901.49 | 18.70778 | 3 R.FIEPIEDIF Splice@chr | 1.06E-12 | 0        |
| 22Feb2011 | 22172 | 901.5  | 29.82399 | 3 R.FIEPIEDIF Splice@chr | 2.45E-13 | 0        |
| 22Feb2011 | 22455 | 901.49 | 18.70778 | 3 R.FIEPIEDIF Splice@chr | 4.03E-10 | 0.009049 |
| 22Feb2011 | 15800 | 531.26 | -5.56558 | 3 R.IAKSCGSI chrX@1618   | 5.20E-10 | 0.009717 |
| 22Feb2011 | 4405  | 462.23 | 1.588005 | 2 K.DMTSAA' chr2@1158    | 2.84E-10 | 0.005915 |
| 22Feb2011 | 4130  | 462.23 | 1.588005 | 2 K.DMTSAA' chr2@1158    | 8.34E-11 | 0.002001 |
| 22Feb2011 | 3086  | 439.25 | -25.6951 | 2 K.IGYVANI' Splice@chr  | 3.94E-11 | 0.001113 |
| 22Feb2011 | 26544 | 794.93 | -16.2684 | 2 K.QIK+14.0 chr2@7920   | 3.13E-10 | 0.007744 |
| 22Feb2011 | 27184 | 957.5  | -16.4894 | 3 R.WIGQSSI chr2@3137    | 9.07E-11 | 0.002193 |
| 22Feb2011 | 23889 | 631.35 | 24.19676 | 5 R.K+14.016 chr4@5275   | 1.18E-10 | 0.003448 |
| 22Feb2011 | 979   | 747.39 | -13.4926 | 1 _IDTATAR. chr4@1368    | 4.61E-10 | 0.008401 |
| 22Feb2011 | 1149  | 747.39 | -13.4926 | 1 _IDTATAR. chr4@1368    | 3.31E-10 | 0.007148 |
| 22Feb2011 | 890   | 747.39 | -13.4926 | 1 _IDTATAR. chr4@1368    | 1.53E-10 | 0.002986 |
| 22Feb2011 | 626   | 747.39 | -13.4926 | 1 _IDTATAR. chr4@1368    | 3.12E-10 | 0.007447 |
| 22Feb2011 | 19768 | 1086.1 | 0.449991 | 2 F.RNETPLL( chr3@3348   | 2.32E-10 | 0.00565  |
| 22Feb2011 | 10342 | 567.78 | -24.1218 | 2 K.NANFLEI( chr3@1435   | 1.32E-11 | 4.62E-04 |
| 22Feb2011 | 10402 | 567.78 | -24.1218 | 2 K.NANFLEI( chr3@1435   | 6.57E-11 | 0.001771 |
| 22Feb2011 | 22321 | 815.69 | -23.0622 | 4 R.QK+14.0' Splice@chr  | 1.73E-10 | 0.003936 |
| 22Feb2011 | 13478 | 483.94 | 20.89601 | 3 _NSIFYSIL( chr1@1217   | 2.24E-10 | 0.004881 |
| 22Feb2011 | 6103  | 582.8  | -11.33   | 2 L.FLSVPSSV Splice@chr  | 3.97E-10 | 0.007032 |
| 22Feb2011 | 26851 | 789.45 | -8.23403 | 3 R.LVWVSTf chr3@1248    | 1.04E-10 | 0.002625 |
| 22Feb2011 | 24455 | 829.75 | -15.1028 | 3 R.HSGGIFQ Splice@chr   | 2.06E-10 | 0.00506  |
| 22Feb2011 | 7336  | 496.29 | -12.2718 | 2 K.LKFINMP chr1@1245    | 2.60E-10 | 0.007571 |
| 22Feb2011 | 7246  | 496.29 | -12.2718 | 2 K.LKFINMP chr1@1245    | 3.67E-10 | 0.007165 |
| 22Feb2011 | 6655  | 496.29 | -12.2718 | 2 K.LKFINMP chr1@1245    | 2.86E-10 | 0.006673 |
| 22Feb2011 | 2778  | 733.36 | -18.0014 | 1 K.DEGSVV( chr4@1044    | 2.05E-10 | 0.003811 |
| 22Feb2011 | 2962  | 733.36 | -18.0014 | 1 K.DEGSVV( chr4@1044    | 2.36E-10 | 0.004929 |
| 22Feb2011 | 19947 | 528.94 | 12.71745 | 3 R.SDEQIH( chr5@1966    | 8.02E-11 | 0.002703 |
| 22Feb2011 | 23111 | 812.43 | -11.8688 | 4 K.NETSWP( chr1@1316    | 4.81E-11 | 0.001669 |
| 22Feb2011 | 21654 | 842.74 | -22.4136 | 3 _IWSAHGI( chr2@1061    | 2.06E-10 | 0.004963 |
| 22Feb2011 | 1991  | 514.91 | -23.9906 | 3 R.IESGGK+ chr5@1092    | 1.74E-10 | 0.003989 |

|           |       |         |          |                         |          |          |
|-----------|-------|---------|----------|-------------------------|----------|----------|
| 22Feb2011 | 18925 | 1047.51 | 20.94578 | 3 R.LQIPCVAl chr4@2001  | 2.61E-10 | 0.004926 |
| 22Feb2011 | 26876 | 731.21  | 11.39346 | 4 K.VRIKIRGL chr3@1289  | 2.31E-10 | 0.004818 |
| 1Mar2011- | 19444 | 675.38  | -15.8939 | 2 F.NKVFAQG chrX@1052   | 3.38E-10 | 0.008906 |
| 22Feb2011 | 24164 | 927.53  | 5.93758  | 1 R.LGAPNIM chr5@7826   | 1.07E-11 | 2.04E-04 |
| 22Feb2011 | 21744 | 818.08  | 0.497999 | 3 K.INRQNNF chr2@1384   | 6.05E-11 | 0.001671 |
| 22Feb2011 | 3225  | 588.35  | 11.32714 | 2 K.LDFDLVA chr5@2081   | 2.87E-10 | 0.006179 |
| 22Feb2011 | 20721 | 594.85  | -9.5133  | 2 K.TLNTGISI chr5@9306  | 2.65E-10 | 0.004249 |
| 22Feb2011 | 1124  | 468.58  | -27.0381 | 3 K.NEAM+1 chrX@1504    | 3.16E-10 | 0.009047 |
| 22Feb2011 | 5711  | 458.22  | -4.67227 | 2 K.FYASHYK Splice@chr  | 8.94E-11 | 0.0027   |
| 22Feb2011 | 5001  | 458.22  | -4.67227 | 2 K.FYASHYK Splice@chr  | 2.76E-11 | 7.16E-04 |
| 22Feb2011 | 6789  | 458.22  | -4.67227 | 2 K.FYASHYK Splice@chr  | 8.56E-11 | 0.002477 |
| 22Feb2011 | 21288 | 880.48  | 3.747601 | 2 S.ADFLDQM chrX@1601   | 5.70E-10 | 0.009464 |
| 22Feb2011 | 20404 | 880.48  | 3.747601 | 2 S.ADFLDQM chrX@1601   | 3.13E-10 | 0.006744 |
| 22Feb2011 | 3141  | 454.75  | 23.97313 | 2 R.VGSGCAI Splice@chr  | 5.21E-10 | 0.008676 |
| 22Feb2011 | 19899 | 736.11  | -11.3573 | 4 R.M+15.99 Splice@chr  | 1.93E-10 | 0.003296 |
| 22Feb2011 | 16206 | 736.36  | 8.881214 | 2 K.LYSETEN chr4@5569   | 3.38E-11 | 5.28E-04 |
| 22Feb2011 | 11346 | 478.81  | -22.5673 | 2 _INLAGKL chrX@1336    | 3.06E-10 | 0.007056 |
| 22Feb2011 | 13005 | 458.59  | -19.1183 | 3 R.LRFAVAV chr5@6611   | 4.83E-10 | 0.009819 |
| 22Feb2011 | 23226 | 880.42  | -28.455  | 2 R.RWWQG chr4@1678     | 2.38E-10 | 0.005107 |
| 22Feb2011 | 6807  | 679.39  | -14.2153 | 2 R.KSGDRLS chrX@1406   | 4.01E-11 | 0.001316 |
| 22Feb2011 | 24924 | 788.72  | 15.60037 | 3 K.NMRNSLI Splice@chr  | 3.71E-10 | 0.007963 |
| 22Feb2011 | 20207 | 637.84  | 6.517286 | 2 R.M+15.99 chrX@1560   | 3.87E-11 | 0.002036 |
| 22Feb2011 | 25441 | 725.87  | -7.1185  | 2 K.NFYPFKN chr5@1976   | 2.70E-10 | 0.005968 |
| 22Feb2011 | 1873  | 426.21  | -10.1437 | 3 R.TSTDAIS chrX@1152   | 2.87E-10 | 0.007146 |
| 22Feb2011 | 2379  | 426.21  | -10.1437 | 3 R.TSTDAIS chrX@1152   | 8.02E-11 | 0.002527 |
| 22Feb2011 | 27663 | 708.36  | -15.325  | 2 K.EERHRQY Splice@chr  | 6.79E-11 | 0.001867 |
| 22Feb2011 | 10791 | 719.7   | -15.2641 | 3 K.TLFNSTF Splice@chr  | 4.11E-11 | 5.81E-04 |
| 22Feb2011 | 11442 | 771.72  | 6.04867  | 3 R.QTFVKEG chr4@7049   | 2.94E-10 | 0.004349 |
| 22Feb2011 | 20047 | 658.99  | 7.889854 | 3 K.K+14.016 chr2@1351  | 1.00E-10 | 0.002568 |
| 22Feb2011 | 25927 | 1046.53 | -2.07237 | 2 K.CTFYWRI chr5@3183   | 2.35E-10 | 0.007255 |
| 22Feb2011 | 5810  | 678.34  | -3.24399 | 1 R.GNATSTK chrX@8918   | 2.17E-10 | 0.004057 |
| 22Feb2011 | 6527  | 679.39  | 28.25189 | 2 K.KRTTHTF chrX@1521   | 2.32E-10 | 0.004933 |
| 22Feb2011 | 14499 | 686.35  | -22.1847 | 3 K.MM+15.9 chr5@1362   | 2.64E-10 | 0.007571 |
| 22Feb2011 | 139   | 409.54  | 9.960172 | 3 K.YM+15.9 chr4@1449   | 4.59E-11 | 0.001356 |
| 22Feb2011 | 899   | 516.27  | 4.619749 | 2 R.K+14.016 chr4@6473  | 3.46E-10 | 0.00591  |
| 1Mar2011- | 13278 | 479.62  | -20.7437 | 3 K.LERKLRF chr4@8945   | 2.41E-10 | 0.006584 |
| 22Feb2011 | 24861 | 675.42  | -5.61105 | 4 K.KKLRLKC Splice@chr  | 2.03E-11 | 5.17E-04 |
| 22Feb2011 | 5004  | 553.28  | 2.983953 | 2 R.KGSGEGK Splice@chr  | 4.20E-10 | 0.009796 |
| 22Feb2011 | 4876  | 553.28  | 2.983953 | 2 R.KGSGEGK Splice@chr  | 4.15E-11 | 0.001274 |
| 22Feb2011 | 5878  | 761.4   | -5.85953 | 1 K.VGLDETK Splice@chr  | 3.98E-10 | 0.008085 |
| 22Feb2011 | 6053  | 761.4   | -5.85953 | 1 K.VGLDETK Splice@chr  | 3.98E-10 | 0.008492 |
| 22Feb2011 | 6414  | 761.4   | -5.85953 | 1 K.VGLDETK Splice@chr  | 3.98E-10 | 0.008227 |
| 22Feb2011 | 21436 | 1046.54 | 29.4525  | 3 _M+15.99 Splice@chr   | 1.96E-10 | 0.004269 |
| 22Feb2011 | 26388 | 970.73  | 16.95206 | 4 K.DKEETVE chr4@1088   | 3.39E-10 | 0.007218 |
| 22Feb2011 | 26494 | 960.27  | 27.12948 | 4 K.CVK+14.C Splice@chr | 4.84E-10 | 0.008009 |
| 1Mar2011- | 475   | 631.35  | -18.6876 | 2 R.KLENKYD chr4@1557   | 6.85E-11 | 0.00234  |
| 22Feb2011 | 26824 | 956.76  | -11.5587 | 4 K.QMHTTK chr1@8323    | 2.99E-10 | 0.006499 |

|           |       |         |          |                         |          |          |
|-----------|-------|---------|----------|-------------------------|----------|----------|
| 22Feb2011 | 22206 | 752.71  | 27.53938 | 3 _FCNLSKN Splice@chr   | 2.15E-10 | 0.005064 |
| 22Feb2011 | 2894  | 443.58  | 28.38738 | 3 R.FDAYMG chr3@1185    | 2.37E-10 | 0.006703 |
| 22Feb2011 | 26403 | 861.45  | -11.9878 | 2 K.VKHYDYV Splice@chr  | 2.68E-10 | 0.005656 |
| 22Feb2011 | 21747 | 915.47  | 26.41374 | 2 R.HFGCGFS chr2@2882   | 1.32E-10 | 0.002315 |
| 22Feb2011 | 19761 | 758.39  | -28.0435 | 2 K.NGFFCVK Splice@chr  | 1.49E-10 | 0.002016 |
| 22Feb2011 | 21192 | 758.39  | -28.0435 | 2 K.NGFFCVK Splice@chr  | 4.89E-10 | 0.009427 |
| 22Feb2011 | 11179 | 657.33  | 0.489232 | 4 K.EFQNYPK chr4@8395   | 2.20E-10 | 0.00521  |
| 22Feb2011 | 3444  | 473.76  | 17.36506 | 2 K.ELNVSTG Splice@chr  | 3.36E-10 | 0.00718  |
| 22Feb2011 | 17652 | 690.86  | 23.18117 | 2 K.SM+15.9 chrX@5282   | 2.43E-10 | 0.004903 |
| 22Feb2011 | 5467  | 840.49  | -5.16208 | 1 _STPVAPLI chr1@1372   | 3.23E-10 | 0.007577 |
| 22Feb2011 | 1382  | 435.24  | 4.427622 | 4 K.LEFLQIYS Splice@chr | 4.47E-10 | 0.008712 |
| 22Feb2011 | 20863 | 919.82  | -14.4192 | 3 K.FSLPEVK chr4@5639   | 2.45E-10 | 0.00561  |
| 22Feb2011 | 20941 | 956.76  | 5.619787 | 4 R.SCCSLWK Splice@chr  | 2.89E-10 | 0.007716 |
| 22Feb2011 | 19142 | 936.99  | -29.0645 | 2 R.NPFLEEV chr3@1097   | 2.12E-10 | 0.004972 |
| 22Feb2011 | 72    | 451.23  | -9.97279 | 2 K.KYGTFER chr1@1412   | 3.93E-10 | 0.008174 |
| 22Feb2011 | 12169 | 737.88  | -15.9699 | 4 R.MELK+14 Splice@chr  | 2.70E-10 | 0.005994 |
| 22Feb2011 | 23434 | 799.64  | -4.02039 | 5 R.LLFCENLI chr4@1110  | 2.64E-10 | 0.006189 |
| 22Feb2011 | 24790 | 875.5   | 5.653425 | 1 R.VGSGSII chr3@8102   | 1.31E-10 | 0.003211 |
| 22Feb2011 | 99    | 465.27  | 12.22658 | 2 K.FPANGKF chr5@3772   | 7.82E-11 | 0.002728 |
| 22Feb2011 | 9523  | 402.24  | -7.22561 | 2 R.YALPAIR Splice@chr  | 4.97E-10 | 0.009819 |
| 22Feb2011 | 4272  | 489.6   | -28.7309 | 3 R.LLLHLSN Splice@chr  | 2.14E-10 | 0.003729 |
| 22Feb2011 | 15417 | 569.32  | -19.4001 | 2 R.FWIFLSVI chr5@6774  | 1.70E-10 | 0.003057 |
| 22Feb2011 | 16197 | 569.32  | -19.4001 | 2 R.FWIFLSVI chr5@6774  | 2.82E-10 | 0.00641  |
| 24Mar2011 | 14005 | 930.56  | -7.6524  | 2 R.KEKQWT Splice@chr   | 2.34E-10 | 0.002028 |
| 22Feb2011 | 10032 | 570.34  | -15.6517 | 2 K.NQVTAIL Splice@chr  | 3.71E-11 | 9.24E-04 |
| 22Feb2011 | 9252  | 570.34  | -15.6517 | 2 K.NQVTAIL Splice@chr  | 1.65E-10 | 0.002978 |
| 22Feb2011 | 10683 | 570.34  | -15.6517 | 2 K.NQVTAIL Splice@chr  | 1.19E-10 | 0.003444 |
| 22Feb2011 | 18891 | 757.88  | 23.95104 | 2 R.IISTSDSL chr2@1452  | 6.17E-11 | 0.002191 |
| 22Feb2011 | 2048  | 428.26  | 8.214236 | 2 _ATVAPQI chr2@1286    | 2.99E-10 | 0.007291 |
| 22Feb2011 | 2093  | 428.26  | 8.214236 | 2 _ATVAPQI chr2@1286    | 2.12E-10 | 0.004719 |
| 22Feb2011 | 22272 | 781.43  | 27.29529 | 2 R.FIPRPLSC chr5@5608  | 3.48E-10 | 0.008089 |
| 22Feb2011 | 21083 | 1010.25 | -24.2408 | 4 R.MMHTIP Splice@chr   | 1.02E-10 | 0.003629 |
| 22Feb2011 | 16489 | 611     | 13.71695 | 3 _WFMEKT chr5@1462     | 3.66E-10 | 0.009322 |
| 22Feb2011 | 13942 | 473.25  | -2.0033  | 2 K.CANSPKL chr5@1902   | 2.98E-10 | 0.008719 |
| 22Feb2011 | 25712 | 705.38  | -3.69713 | 3 K.ADKIVVIN chr1@4941  | 3.78E-10 | 0.009057 |
| 22Feb2011 | 27545 | 705.37  | -18.0235 | 3 K.ADKIVVIN chr1@4941  | 3.67E-10 | 0.007863 |
| 22Feb2011 | 25281 | 705.71  | -10.0217 | 3 K.ADKIVVIN chr1@4941  | 4.09E-10 | 0.009212 |
| 22Feb2011 | 22890 | 688.37  | 12.87562 | 4 K.RIIAVGNI chr1@8085  | 4.21E-11 | 0.001304 |
| 22Feb2011 | 23259 | 836.42  | -18.0185 | 2 _KLYSWG chr5@1928     | 3.34E-10 | 0.006691 |
| 22Feb2011 | 1210  | 416.23  | -19.9908 | 2 _LSNATAV chr5@9139    | 1.14E-10 | 0.002476 |
| 22Feb2011 | 27492 | 953.34  | 14.18446 | 4 _K+14.016 chr3@2842   | 2.13E-10 | 0.00504  |
| 22Feb2011 | 27157 | 765.07  | -24.1602 | 3 K.KIDFILAY chrX@7126  | 1.55E-11 | 5.16E-04 |
| 22Feb2011 | 24425 | 1175.32 | 2.286916 | 3 S.WSPAYVI chrX@1681   | 2.19E-10 | 0.004619 |
| 22Feb2011 | 2086  | 513.27  | -26.6091 | 3 K.GKRNG chr5@1790     | 7.16E-11 | 0.00244  |
| 22Feb2011 | 5475  | 553.8   | 19.2868  | 2 R.KLDSPAN chrX@1558   | 3.93E-11 | 0.001122 |
| 22Feb2011 | 59    | 450.24  | -21.738  | 3 R.EEGKIGRI chr3@3488  | 4.95E-10 | 0.009099 |
| 22Feb2011 | 14556 | 560.31  | 21.02823 | 2 K.KCGVTQF chr2@7976   | 3.68E-10 | 0.008471 |

|           |       |         |          |                        |          |          |
|-----------|-------|---------|----------|------------------------|----------|----------|
| 22Feb2011 | 14203 | 560.31  | 21.02823 | 2 K.KCGVTQf chr2@7976  | 2.42E-10 | 0.00524  |
| 22Feb2011 | 20404 | 560.06  | 21.43685 | 4 K.QDENKN chr1@4750   | 1.81E-10 | 0.0034   |
| 22Feb2011 | 20950 | 560.06  | 21.43685 | 4 K.QDENKN chr1@4750   | 4.35E-10 | 0.008532 |
| 22Feb2011 | 1447  | 508.24  | 8.362992 | 2 R.FEYTNWI chrX@1339  | 1.52E-10 | 0.002016 |
| 22Feb2011 | 11144 | 489.28  | 6.973609 | 4 S.NRIRK+14 chr3@1080 | 3.97E-10 | 0.008968 |
| 22Feb2011 | 21380 | 1004.83 | -3.0607  | 3 _K+14.016 Splice@chr | 4.31E-13 | 0        |
| 24Mar2011 | 4398  | 1025.61 | -11.6755 | 1 K.LGLGSGL chr5@4945  | 3.11E-11 | 0        |
| 24Mar2011 | 1256  | 510.3   | 12.8833  | 2 R.RHVAYVF chr1@1479  | 6.54E-12 | 0        |
| 24Mar2011 | 9472  | 938.46  | 22.50833 | 2 R.ECSQSDS chr2@8876  | 5.20E-10 | 0.006806 |
| 24Mar2011 | 6872  | 626.31  | 6.247018 | 2 K.SEELMYN Splice@chr | 8.83E-13 | 0        |
| 24Mar2011 | 3961  | 533.82  | 16.26677 | 2 K.TNIYTILT chr5@1329 | 2.14E-10 | 0.001888 |
| 24Mar2011 | 4347  | 1025.61 | -11.6755 | 1 K.LGLGSGL chr5@4945  | 1.88E-11 | 0        |
| 24Mar2011 | 13434 | 860.68  | 2.433027 | 4 R.FQSAAIG Splice@chr | 2.70E-13 | 0        |
| 24Mar2011 | 1035  | 510.3   | 12.8833  | 2 R.RHVAYVF chr1@1479  | 6.40E-11 | 6.25E-04 |
| 24Mar2011 | 11978 | 1003.19 | 17.13413 | 3 R.CWNRRA Splice@chr  | 4.96E-10 | 0.006406 |
| 24Mar2011 | 3473  | 693.87  | -6.6949  | 2 V.ICVAVGD chr5@1065  | 3.20E-10 | 0.003423 |
| 24Mar2011 | 2364  | 741.38  | -23.1647 | 2 K.FPENRHI chr2@1477  | 2.73E-10 | 0.002591 |
| 24Mar2011 | 13186 | 962.46  | -26.3952 | 3 R.WFWGQI chr4@3030   | 4.12E-10 | 0.005488 |
| 24Mar2011 | 10629 | 747.39  | 13.7081  | 2 K.MLRFNEC chr2@8355  | 1.00E-10 | 0.001204 |
| 24Mar2011 | 6715  | 1075.05 | -16.1169 | 2 R.TCSK+14. chr2@1255 | 6.67E-11 | 6.25E-04 |
| 24Mar2011 | 11609 | 731.89  | -5.88992 | 2 R.VDETLILC chr2@8606 | 2.03E-13 | 0        |
| 24Mar2011 | 6876  | 825.46  | -13.1033 | 2 R.SARENKT Splice@chr | 5.04E-10 | 0.007665 |
| 24Mar2011 | 7734  | 706.34  | 8.098268 | 2 M.PSMEEV chr5@4890   | 5.56E-15 | 0        |
| 24Mar2011 | 7757  | 671.37  | -24.0361 | 2 T.FNIVHTQ Splice@chr | 1.81E-10 | 0.001949 |
| 24Mar2011 | 2097  | 536.29  | -10.9462 | 2 _QVEFNPI Splice@chr  | 3.00E-11 | 1.78E-04 |
| 24Mar2011 | 10686 | 747.39  | 13.7081  | 2 K.MLRFNEC chr2@8355  | 1.35E-10 | 0.001318 |
| 24Mar2011 | 6965  | 1075.06 | -6.79295 | 2 R.TCSK+14. chr2@1255 | 3.95E-10 | 0.00559  |
| 24Mar2011 | 13448 | 970.45  | -29.5364 | 3 _VACNKM Splice@chr   | 2.61E-11 | 1.78E-04 |
| 24Mar2011 | 10167 | 1005.47 | -16.3827 | 2 K.KVELALW Splice@chr | 9.74E-23 | 0        |
| 24Mar2011 | 7029  | 1004.81 | -8.08885 | 3 K.AVMFTVI Splice@chr | 3.32E-18 | 0        |
| 24Mar2011 | 2970  | 741.38  | -23.1647 | 2 K.FPENRHI chr2@1477  | 1.16E-10 | 0.001318 |
| 24Mar2011 | 7800  | 671.37  | -24.0361 | 2 T.FNIVHTQ Splice@chr | 3.54E-10 | 0.005007 |
| 24Mar2011 | 2902  | 741.39  | -17.2291 | 2 K.QKSNWH chr5@1229   | 1.90E-11 | 1.78E-04 |
| 24Mar2011 | 13539 | 1147.25 | 13.44098 | 3 R.FQSAAIG Splice@chr | 2.27E-16 | 0        |
| 24Mar2011 | 3014  | 741.39  | -17.2291 | 2 K.QKSNWH chr5@1229   | 3.52E-11 | 1.78E-04 |
| 24Mar2011 | 13524 | 1147.25 | 13.44098 | 3 R.FQSAAIG Splice@chr | 5.94E-15 | 0        |
| 24Mar2011 | 7846  | 671.37  | -24.0361 | 2 T.FNIVHTQ Splice@chr | 4.76E-10 | 0.006923 |
| 24Mar2011 | 9182  | 833.93  | -9.2006  | 2 _IIEPYVAV Splice@chr | 3.87E-10 | 0.00559  |
| 24Mar2011 | 2094  | 562.83  | -11.5155 | 2 K.RQERGILI chr1@1844 | 3.77E-11 | 1.78E-04 |
| 24Mar2011 | 6687  | 663.85  | -5.06443 | 2 N.KMIFSMI chr4@8622  | 4.49E-10 | 0.006326 |
| 24Mar2011 | 1913  | 510.3   | 12.8833  | 2 R.RHVAYVF chr1@1479  | 1.31E-11 | 1.78E-04 |
| 24Mar2011 | 1025  | 1115.56 | -14.3036 | 1 R.RMPPAA chr2@1507   | 7.06E-11 | 5.15E-04 |
| 24Mar2011 | 1954  | 510.3   | 12.8833  | 2 R.RHVAYVF chr1@1479  | 6.54E-12 | 0        |
| 24Mar2011 | 4323  | 493.78  | -11.3951 | 2 R.KNQENLI Splice@chr | 3.27E-10 | 0.004552 |
| 24Mar2011 | 2379  | 593.34  | -8.71255 | 2 R.RSTFGSFI chrX@1374 | 3.52E-10 | 0.005007 |
| 24Mar2011 | 9868  | 622.33  | 9.587405 | 2 R.AK+14.01 chr2@4270 | 3.97E-10 | 0.00559  |
| 24Mar2011 | 4195  | 434.24  | 13.9946  | 3 _RSNDQTI chr5@6378   | 1.80E-10 | 0.001949 |

|           |       |         |          |                          |          |          |
|-----------|-------|---------|----------|--------------------------|----------|----------|
| 24Mar2011 | 3204  | 936.48  | 27.86052 | 1 K.LNGGYEC chr2@1191    | 4.37E-11 | 5.15E-04 |
| 24Mar2011 | 10365 | 785.42  | 22.95449 | 1 _..MPAWAF chr2@1115    | 3.60E-11 | 1.78E-04 |
| 24Mar2011 | 10117 | 1056.56 | 28.0642  | 3 I.SRVEDDS Splice@chr   | 7.78E-17 | 0        |
| 24Mar2011 | 9821  | 622.33  | 9.587405 | 2 R.AK+14.01 chr2@4270   | 3.00E-10 | 0.003949 |
| 24Mar2011 | 6303  | 688.03  | -17.0347 | 3 L.IFK+14.01 chr3@8836  | 3.41E-10 | 0.00486  |
| 24Mar2011 | 4267  | 493.78  | -11.3951 | 2 R.KNQENLI Splice@chr   | 2.61E-10 | 0.003336 |
| 24Mar2011 | 12194 | 884.41  | -1.81927 | 3 R.YRVDLAF chr5@6435    | 1.58E-10 | 0.001471 |
| 24Mar2011 | 11601 | 1067.09 | 27.52422 | 2 K.QK+14.01 chr1@4915   | 3.37E-10 | 0.00486  |
| 24Mar2011 | 9472  | 938.46  | 22.50833 | 2 R.ECSQSDS chr2@8876    | 3.81E-10 | 0.00559  |
| 24Mar2011 | 9142  | 833.93  | -9.2006  | 2 _..IIEPYVAV Splice@chr | 3.09E-10 | 0.004404 |
| 24Mar2011 | 3630  | 423.26  | 23.30279 | 2 K.LGAETVV chr2@6180    | 2.23E-10 | 0.002569 |
| 24Mar2011 | 2860  | 741.39  | -17.2291 | 2 K.QKSNWH chr5@1225     | 3.70E-11 | 1.78E-04 |
| 24Mar2011 | 8365  | 1075.06 | -6.79295 | 2 R.TCSK+14. chr2@1255   | 5.85E-10 | 0.009719 |
| 24Mar2011 | 9775  | 622.33  | 9.587405 | 2 R.AK+14.01 chr2@4270   | 4.90E-10 | 0.007372 |
| 24Mar2011 | 3698  | 761.41  | 7.224077 | 1 K.VGLDETK Splice@chr   | 3.98E-10 | 0.00559  |
| 24Mar2011 | 19688 | 990     | -17.5035 | 2 G.CSWRNG chrX@1595     | 1.40E-10 | 0.003449 |
| 24Mar2011 | 15766 | 983.96  | -5.49698 | 2 R.SFSTIPDS chr2@1305   | 5.07E-19 | 0        |
| 24Mar2011 | 3613  | 510.3   | 12.8833  | 2 R.RHVAYVF chr1@1475    | 1.33E-10 | 0.003179 |
| 24Mar2011 | 18666 | 1007.86 | 15.19559 | 3 R.CWNRRA Splice@chr    | 1.87E-11 | 3.25E-04 |
| 24Mar2011 | 22188 | 550.63  | 9.075933 | 3 R.CFELFLK+ chrX@2485   | 3.73E-10 | 0.007876 |
| 24Mar2011 | 20312 | 959.03  | 9.429101 | 2 Y.NNCKLNS chrX@1250    | 2.29E-10 | 0.004941 |
| 24Mar2011 | 18267 | 1104.82 | -4.70082 | 3 S.EDLGSDA chr5@7527    | 2.40E-21 | 0        |
| 24Mar2011 | 2352  | 506.77  | -14.421  | 2 _..VDKNVYF chr4@1192   | 3.45E-10 | 0.007633 |
| 24Mar2011 | 20685 | 1147.24 | 4.705638 | 3 R.FQSAAG Splice@chr    | 8.33E-15 | 0        |
| 24Mar2011 | 14271 | 606.66  | -18.8783 | 3 I.NRFNISK chrX@1250    | 1.58E-10 | 0.003799 |
| 24Mar2011 | 18240 | 828.87  | -1.01339 | 4 S.EDLGSDA Splice@chr   | 2.38E-16 | 0        |
| 24Mar2011 | 13239 | 742.38  | -26.3192 | 2 R.ETFISVEK chr5@7445   | 9.62E-11 | 0.002544 |
| 24Mar2011 | 14215 | 606.66  | -18.8783 | 3 I.NRFNISK chrX@1250    | 1.35E-10 | 0.003266 |
| 24Mar2011 | 3519  | 692.34  | -2.47201 | 2 K.TAEHVEC Splice@chr   | 1.68E-13 | 0        |
| 24Mar2011 | 11660 | 626.3   | -9.76097 | 2 K.SEELMYN chr4@2675    | 1.51E-13 | 0        |
| 24Mar2011 | 6181  | 936.48  | 27.86052 | 1 K.LNGGYEC chr2@1191    | 2.77E-11 | 4.23E-04 |
| 24Mar2011 | 19780 | 491.64  | 23.22207 | 3 R.LLLDKPLF Splice@chr  | 2.06E-10 | 0.004406 |
| 24Mar2011 | 14960 | 753.95  | -13.1319 | 2 K.K+14.016 chr2@1375   | 4.99E-11 | 0.001326 |
| 24Mar2011 | 17236 | 912.99  | -3.34628 | 2 F.TEMPLGC chrX@9861    | 1.38E-11 | 2.18E-04 |
| 24Mar2011 | 5682  | 439.75  | -7.44254 | 2 K.LYGEVGL chrX@2908    | 7.70E-11 | 0.001888 |
| 24Mar2011 | 2141  | 503.28  | -21.0222 | 2 K.RSLEYIPK chr1@1227   | 2.46E-10 | 0.005668 |
| 24Mar2011 | 11193 | 825.96  | -15.1379 | 2 R.SARENKT Splice@chr   | 7.63E-11 | 0.001888 |
| 24Mar2011 | 14902 | 753.95  | -13.1319 | 2 K.K+14.016 chr2@1375   | 2.37E-11 | 4.23E-04 |
| 24Mar2011 | 15834 | 785.42  | 22.95449 | 1 _..MPAWAF chr2@1115    | 1.61E-11 | 2.18E-04 |
| 24Mar2011 | 3501  | 510.3   | 12.8833  | 2 R.RHVAYVF chr1@1475    | 1.77E-10 | 0.004155 |
| 24Mar2011 | 15893 | 785.42  | 22.95449 | 1 _..MPAWAF chr2@1115    | 2.85E-11 | 4.23E-04 |
| 24Mar2011 | 13948 | 801.7   | -6.78619 | 3 K.FFKPNTD chr5@7527    | 1.46E-15 | 0        |
| 24Mar2011 | 18009 | 665.37  | -26.6417 | 2 Q.INNK+14 Splice@chr   | 2.38E-10 | 0.005485 |
| 24Mar2011 | 15842 | 575.97  | 16.41892 | 3 K.TSASGEE Splice@chr   | 3.40E-10 | 0.007633 |
| 24Mar2011 | 3461  | 692.34  | -2.47201 | 2 K.TAEHVEC Splice@chr   | 2.18E-13 | 0        |
| 24Mar2011 | 14793 | 814.48  | -1.6879  | 2 L.LNESRDG chr3@5385    | 2.29E-10 | 0.004941 |
| 24Mar2011 | 5866  | 741.39  | -17.2291 | 2 K.QKSNWH chr5@1225     | 3.15E-10 | 0.007147 |

|           |       |         |          |                         |          |          |
|-----------|-------|---------|----------|-------------------------|----------|----------|
| 24Mar2011 | 3419  | 452.26  | -4.66636 | 2 R.VLHNAPF chr2@1406   | 3.89E-10 | 0.008132 |
| 24Mar2011 | 7866  | 533.82  | 16.26677 | 2 K.TNIYTILTI chr5@1329 | 2.91E-10 | 0.006801 |
| 24Mar2011 | 19425 | 634.83  | -9.39461 | 2 R.VDIGDILF Splice@chr | 5.80E-13 | 0        |
| 24Mar2011 | 15710 | 983.96  | -5.49698 | 2 R.SFSTIPDS chr2@1305  | 4.64E-18 | 0        |
| 24Mar2011 | 7235  | 583.79  | -23.2497 | 2 R.YLAAAAC chr5@9265   | 1.50E-10 | 0.003799 |
| 24Mar2011 | 19750 | 491.64  | 23.22207 | 3 R.LLLDKPLF Splice@chr | 1.03E-10 | 0.002544 |
| 24Mar2011 | 3556  | 510.3   | 12.8833  | 2 R.RHVAYVF chr1@1479   | 1.25E-10 | 0.002902 |
| 24Mar2011 | 19348 | 634.84  | 6.410455 | 2 R.VDIGDILF Splice@chr | 1.15E-12 | 0        |
| 24Mar2011 | 5887  | 531.29  | -6.73762 | 2 K.MPMGVt chr2@6727    | 3.34E-10 | 0.007587 |
| 24Mar2011 | 3480  | 461.9   | 6.268311 | 3 K.TAEHVEC chr5@1002   | 3.71E-10 | 0.007795 |
| 24Mar2011 | 17093 | 641.36  | 4.696963 | 4 A.EITEMLPi Splice@chr | 7.52E-11 | 0.001796 |
| 24Mar2011 | 13903 | 801.7   | -6.78619 | 3 K.FFKPNTD chr5@7527   | 4.83E-16 | 0        |
| 24Mar2011 | 11249 | 825.96  | -15.1379 | 2 R.SARENKT Splice@chr  | 6.65E-11 | 0.001706 |
| 24Mar2011 | 20709 | 860.68  | 2.433027 | 4 R.FQSAAIG Splice@chr  | 8.83E-14 | 0        |
| 24Mar2011 | 21396 | 921     | -9.12591 | 2 K.K+14.016 chr1@1372  | 5.27E-11 | 0.00161  |
| 24Mar2011 | 17009 | 742.88  | -6.21424 | 2 K.M+15.99 chr4@1648   | 3.71E-10 | 0.007795 |
| 24Mar2011 | 5917  | 741.38  | -23.1647 | 2 K.FPENRHI, chr2@1477  | 1.92E-10 | 0.004406 |
| 24Mar2011 | 15664 | 1005.47 | -16.3827 | 2 K.KVELALW Splice@chr  | 4.98E-20 | 0        |
| 24Mar2011 | 19385 | 634.83  | -9.39461 | 2 R.VDIGDILF Splice@chr | 4.54E-13 | 0        |
| 24Mar2011 | 20712 | 1147.24 | 4.705638 | 3 R.FQSAAIG Splice@chr  | 7.17E-17 | 0        |
| 24Mar2011 | 14478 | 858.47  | -5.67211 | 3 _LETGIKPI Splice@chr  | 1.42E-11 | 2.18E-04 |
| 24Mar2011 | 17991 | 672.58  | -19.3267 | 5 R.KVSNVQ\ chr5@8812   | 3.25E-10 | 0.007232 |
| 24Mar2011 | 7554  | 908.47  | 22.76165 | 1 R.DGRMTV chr2@5006    | 2.27E-10 | 0.004853 |
| 24Mar2011 | 17345 | 1143.87 | 4.220916 | 3 K.NMITGTS Splice@chr  | 4.60E-11 | 0.001131 |
| 24Mar2011 | 19881 | 909.81  | -14.9364 | 3 Y.FRLQGSIL chrX@9505  | 3.68E-10 | 0.007795 |
| 24Mar2011 | 8046  | 527.95  | 11.73747 | 3 K.SVVSISSE chr4@1045  | 4.80E-10 | 0.009559 |
| 24Mar2011 | 1223  | 873.5   | -22.6649 | 1 R.QLGFPIAI chr3@2252  | 3.39E-10 | 0.007633 |
| 24Mar2011 | 5912  | 509.3   | -20.473  | 2 R.SSVIMLIV chr2@5767  | 3.76E-11 | 0.002517 |
| 24Mar2011 | 1659  | 510.3   | 12.8833  | 2 R.RHVAYVF chr1@1479   | 6.54E-12 | 3.00E-04 |
| 24Mar2011 | 4284  | 529.6   | -12.9775 | 3 _AFHESKLi chrX@3405   | 1.60E-10 | 0.007476 |
| 24Mar2011 | 1724  | 510.3   | 12.8833  | 2 R.RHVAYVF chr1@1479   | 6.54E-12 | 3.00E-04 |
| 24Mar2011 | 11999 | 634.84  | 6.410455 | 2 R.VDIGDILF Splice@chr | 8.49E-13 | 0        |
| 24Mar2011 | 782   | 452.23  | -1.48793 | 2 R.SGEPLSA' Splice@chr | 2.83E-11 | 0.001151 |
| 24Mar2011 | 2942  | 519.6   | -26.5197 | 3 K.IGSM+15 chr5@1654   | 1.87E-10 | 0.008205 |
| 24Mar2011 | 9772  | 983.97  | 4.629411 | 2 R.SFSTIPDS chr2@1305  | 2.39E-17 | 0        |
| 24Mar2011 | 5862  | 509.3   | -20.473  | 2 R.SSVIMLIV chr2@5767  | 6.08E-11 | 0.003573 |
| 24Mar2011 | 5863  | 1017.59 | -22.5744 | 1 R.SSVIMLIV chr2@5767  | 6.68E-11 | 0.00382  |
| 24Mar2011 | 12019 | 634.83  | -9.39461 | 2 R.VDIGDILF Splice@chr | 1.75E-12 | 0        |
| 24Mar2011 | 11268 | 987.51  | 4.289691 | 3 K.KYLFLDNI chr4@1288  | 1.10E-11 | 3.00E-04 |
| 24Mar2011 | 13392 | 1105.21 | -11.0549 | 3 K.LAFDDAI, Splice@chr | 6.17E-12 | 0        |
| 24Mar2011 | 2843  | 936.48  | 27.86052 | 1 K.LNGGYEC chr2@1191   | 4.82E-11 | 0.002779 |
| 24Mar2011 | 7877  | 748.73  | -12.625  | 3 R.LPSKENL\ chr4@5635  | 2.24E-10 | 0.009891 |
| 24Mar2011 | 1275  | 452.23  | -1.48793 | 2 R.SGEPLSA' Splice@chr | 5.88E-11 | 0.003573 |
| 24Mar2011 | 1126  | 452.23  | -1.48793 | 2 R.SGEPLSA' Splice@chr | 4.76E-11 | 0.002779 |
| 24Mar2011 | 1097  | 452.23  | -1.48793 | 2 R.SGEPLSA' Splice@chr | 5.72E-11 | 0.003313 |
| 24Mar2011 | 5956  | 509.3   | -20.473  | 2 R.SSVIMLIV chr2@5767  | 4.82E-11 | 0.002779 |
| 24Mar2011 | 12805 | 1147.25 | 13.44098 | 3 R.FQSAAIG Splice@chr  | 2.88E-13 | 0        |

|           |       |         |          |                         |          |          |
|-----------|-------|---------|----------|-------------------------|----------|----------|
| 24Mar2011 | 9373  | 622.33  | 9.587405 | 2 R.AK+14.01 chr2@4270  | 7.40E-11 | 0.004299 |
| 24Mar2011 | 2581  | 741.39  | -17.2291 | 2 K.QKSNWH chr5@1229    | 4.66E-11 | 0.002517 |
| 24Mar2011 | 4518  | 1197.59 | 5.566354 | 1 R.YEVASGS chr2@2996   | 7.05E-11 | 0.00382  |
| 24Mar2011 | 12789 | 1147.25 | 13.44098 | 3 R.FQSAAIG Splice@chr  | 3.18E-15 | 0        |
| 24Mar2011 | 5154  | 822.47  | -23.826  | 2 K.KVLLVST( chr1@1119  | 2.11E-10 | 0.009167 |
| 24Mar2011 | 1689  | 510.3   | 12.8833  | 2 R.RHVAYVF chr1@1479   | 7.05E-11 | 0.00382  |
| 24Mar2011 | 1695  | 587.34  | 11.13845 | 2 R.ARAIEK+ chr4@5939   | 2.26E-10 | 0.009891 |
| 24Mar2011 | 12049 | 634.84  | 6.410455 | 2 R.VDIGDILF Splice@chr | 5.04E-13 | 0        |
| 24Mar2011 | 1507  | 510.3   | 12.8833  | 2 R.RHVAYVF chr1@1479   | 1.31E-11 | 3.00E-04 |
| 24Mar2011 | 6012  | 509.3   | -20.473  | 2 R.SSVIMLIV chr2@5767  | 1.06E-10 | 0.005319 |
| 24Mar2011 | 11399 | 1003.19 | 17.13413 | 3 R.CWNRRA Splice@chr   | 6.32E-12 | 0        |
| 24Mar2011 | 10255 | 978.99  | 0.312046 | 2 R.HYLLNLPI Splice@chr | 2.24E-10 | 0.009891 |
| 24Mar2011 | 8742  | 606.67  | -2.35139 | 3 I.NRFNISK chrX@1250   | 1.06E-10 | 0.005319 |
| 24Mar2011 | 3811  | 434.24  | 13.9946  | 3 _RSNDQTI chr5@6378    | 1.28E-12 | 0        |
| 24Mar2011 | 8301  | 945.45  | -23.4585 | 2 K.FSKKNMI chr4@1701   | 1.46E-10 | 0.007476 |
| 24Mar2011 | 808   | 452.23  | -1.48793 | 2 R.SGEPLSA: Splice@chr | 2.45E-11 | 0.001151 |
| 24Mar2011 | 5816  | 509.3   | -20.473  | 2 R.SSVIMLIV chr2@5767  | 4.60E-11 | 0.002517 |
| 24Mar2011 | 8506  | 801.71  | 5.720343 | 3 K.FFKPNTD chr5@7527   | 3.80E-16 | 0        |
| 24Mar2011 | 5769  | 509.3   | -20.473  | 2 R.SSVIMLIV chr2@5767  | 5.12E-11 | 0.002779 |
| 24Mar2011 | 9694  | 1005.47 | -16.3827 | 2 K.KVELALM Splice@chr  | 2.49E-22 | 0        |
| 24Mar2011 | 8457  | 801.71  | 5.720343 | 3 K.FFKPNTD chr5@7527   | 1.55E-16 | 0        |
| 24Mar2011 | 1491  | 452.23  | -1.48793 | 2 R.SGEPLSA: Splice@chr | 2.28E-11 | 4.05E-04 |
| 24Mar2011 | 10714 | 622.33  | 3.688505 | 2 K.EREREKEI chrX@1638  | 5.59E-10 | 0.007516 |
| 24Mar2011 | 14284 | 1005.47 | -16.3827 | 2 K.KVELALM Splice@chr  | 3.81E-22 | 0        |
| 24Mar2011 | 11001 | 844.43  | 17.99527 | 2 _EGDGEIEI Splice@chr  | 1.38E-11 | 4.05E-04 |
| 24Mar2011 | 1589  | 452.23  | -1.48793 | 2 R.SGEPLSA: Splice@chr | 9.29E-11 | 0.001874 |
| 24Mar2011 | 10303 | 626.3   | -9.76097 | 2 K.SEELMYN Splice@chr  | 9.79E-14 | 0        |
| 24Mar2011 | 13229 | 858.47  | -5.67211 | 3 _LETGIKPI Splice@chr  | 9.85E-12 | 2.88E-04 |
| 24Mar2011 | 1538  | 452.23  | -1.48793 | 2 R.SGEPLSA: Splice@chr | 2.33E-10 | 0.004358 |
| 24Mar2011 | 9538  | 831.39  | -27.5413 | 2 K.KFTFEIEE chrX@1364  | 1.64E-10 | 0.003507 |
| 24Mar2011 | 1834  | 517.29  | -7.09318 | 2 _FRVEVVE Splice@chr   | 1.67E-10 | 0.00362  |
| 24Mar2011 | 8063  | 724.34  | 5.400383 | 3 V.CLTEEGK Splice@chr  | 4.63E-12 | 1.54E-04 |
| 24Mar2011 | 13744 | 803.93  | 13.57891 | 2 H.ASSLMII\ Splice@chr | 5.18E-10 | 0.006872 |
| 24Mar2011 | 15238 | 722.45  | -4.95112 | 2 R.RK+14.01 Splice@chr | 1.83E-10 | 0.003715 |
| 24Mar2011 | 4979  | 936.48  | 27.86052 | 1 K.LNGGYEC Splice@chr  | 1.12E-10 | 0.002338 |
| 24Mar2011 | 12954 | 607     | -9.70672 | 3 I.NRFNISK chrX@1250   | 5.78E-11 | 0.00128  |
| 24Mar2011 | 14258 | 1056.56 | 28.0642  | 3 I.SRVEDDS( Splice@chr | 1.98E-13 | 0        |
| 24Mar2011 | 18810 | 1147.24 | 4.705638 | 3 R.FQSAAIG Splice@chr  | 2.80E-13 | 0        |
| 24Mar2011 | 3800  | 626.82  | -18.5922 | 2 W.QFDLGK Splice@chr   | 6.92E-10 | 0.008743 |
| 24Mar2011 | 12270 | 1128.04 | -2.03078 | 2 _IPSAVGY( Splice@chr  | 4.26E-12 | 1.54E-04 |
| 24Mar2011 | 1869  | 562.33  | 22.25853 | 2 R.FYLLYLYK Splice@chr | 7.10E-11 | 0.001655 |
| 24Mar2011 | 13629 | 516.3   | 4.106203 | 3 R.NIIFLMVI chrX@1294  | 2.25E-10 | 0.00427  |
| 24Mar2011 | 8109  | 496.29  | -10.6595 | 2 R.EIKLFDVK Splice@chr | 4.32E-10 | 0.00627  |
| 24Mar2011 | 14339 | 1005.46 | -26.2921 | 2 K.KVELALM Splice@chr  | 3.89E-21 | 0        |
| 24Mar2011 | 2902  | 469.74  | 26.75955 | 2 K.YLEGKAE Splice@chr  | 2.32E-10 | 0.004358 |
| 24Mar2011 | 3081  | 454.23  | -12.7934 | 2 K.QFTGTPT chrX@5751   | 2.71E-10 | 0.004456 |
| 24Mar2011 | 1642  | 452.23  | -1.48793 | 2 R.SGEPLSA: Splice@chr | 4.48E-11 | 7.87E-04 |

|           |       |         |          |                         |          |          |
|-----------|-------|---------|----------|-------------------------|----------|----------|
| 24Mar2011 | 5316  | 626.8   | -12.4435 | 2 R.LCESGAA Splice@chr  | 8.80E-16 | 0        |
| 24Mar2011 | 2360  | 498.58  | 26.57833 | 3 R.SQYLQM Splice@chr   | 1.42E-10 | 0.002931 |
| 24Mar2011 | 12332 | 1120.57 | -6.43296 | 2 K.YNFVRLV chrX@745    | 7.50E-10 | 0.009376 |
| 24Mar2011 | 13691 | 803.92  | 1.104277 | 2 H.ASSLMI\ Splice@chr  | 6.52E-10 | 0.00789  |
| 24Mar2011 | 2510  | 510.3   | 12.82338 | 2 N.RHVSFVF chrX@693    | 6.26E-10 | 0.007689 |
| 24Mar2011 | 13900 | 505.25  | 2.602438 | 2 K.HVFNQF\ chrX@383    | 6.52E-10 | 0.00789  |
| 24Mar2011 | 13103 | 833.93  | -9.2006  | 2 _IIEPYVAV Splice@chr  | 7.02E-10 | 0.008743 |
| 24Mar2011 | 10297 | 1004.81 | -8.08885 | 3 K.AVMFTVI Splice@chr  | 4.63E-17 | 0        |
| 24Mar2011 | 9718  | 831.4   | -15.4799 | 2 K.KFTFEIEE chrX@136   | 2.11E-11 | 4.05E-04 |
| 24Mar2011 | 14551 | 1118.92 | 11.45146 | 3 R.NWKPKT Splice@chr   | 5.91E-10 | 0.007689 |
| 24Mar2011 | 14310 | 792.67  | 25.51992 | 4 I.SRVEDDS Splice@chr  | 2.14E-10 | 0.004163 |
| 24Mar2011 | 10040 | 825.46  | -13.1033 | 2 R.SARENKT Splice@chr  | 8.77E-11 | 0.001874 |
| 24Mar2011 | 2128  | 615.38  | -4.86791 | 1 K.LGGGALK chrX@637    | 5.64E-10 | 0.007628 |
| 24Mar2011 | 11777 | 889.69  | 24.20073 | 4 K.NNPYMS Splice@chr   | 3.11E-11 | 5.35E-04 |
| 24Mar2011 | 18021 | 1055.86 | -22.4368 | 3 K.SGTIFDNI Splice@chr | 3.93E-14 | 0        |
| 24Mar2011 | 18827 | 1147.24 | 4.705638 | 3 R.FQSAAIG Splice@chr  | 1.26E-17 | 0        |
| 24Mar2011 | 1929  | 562.31  | -13.4391 | 2 R.FYLLYLYK Splice@chr | 7.91E-11 | 0.001759 |
| 24Mar2011 | 12260 | 701.35  | 13.82807 | 3 K.NNPYMS Splice@chr   | 1.42E-12 | 1.54E-04 |
| 24Mar2011 | 4958  | 463.76  | 10.16944 | 2 R.TVFQTTT Splice@chr  | 2.99E-10 | 0.004901 |
| 24Mar2011 | 6043  | 1075.06 | -6.79295 | 2 R.TCSK+14. chr2@125   | 2.37E-10 | 0.003593 |
| 24Mar2011 | 7122  | 622.33  | 9.587405 | 2 R.AK+14.01 chr2@427   | 1.54E-10 | 0.002192 |
| 24Mar2011 | 4904  | 825.96  | -15.1379 | 2 R.SARENKT Splice@chr  | 2.65E-11 | 0        |
| 24Mar2011 | 2845  | 434.24  | 13.9946  | 3 _RSNDQTI chr5@637     | 6.22E-11 | 0.001013 |
| 24Mar2011 | 1326  | 536.29  | -10.9462 | 2 _QVEFNPI Splice@chr   | 1.51E-10 | 0.002192 |
| 24Mar2011 | 1937  | 741.39  | -9.64508 | 2 K.FPENRHI\ chr2@147   | 1.17E-10 | 0.001479 |
| 24Mar2011 | 1862  | 741.38  | -23.1647 | 2 K.FPENRHI\ chr2@147   | 2.27E-10 | 0.003593 |
| 24Mar2011 | 7783  | 747.39  | 13.7081  | 2 K.MLRFNEC chr2@835    | 2.70E-10 | 0.00499  |
| 24Mar2011 | 6606  | 833.93  | -9.2006  | 2 _IIEPYVAV Splice@chr  | 1.74E-10 | 0.002662 |
| 24Mar2011 | 5903  | 1187.91 | -26.8667 | 3 K.NQPIHVF Splice@chr  | 1.09E-11 | 0        |
| 24Mar2011 | 6166  | 701.36  | 28.23715 | 3 K.NNPYMS Splice@chr   | 5.08E-14 | 0        |
| 24Mar2011 | 7365  | 1004.97 | -14.712  | 2 K.KVELALV Splice@chr  | 1.46E-22 | 0        |
| 24Mar2011 | 1474  | 510.28  | -26.3658 | 2 R.RHVAYVF chr1@147    | 7.05E-11 | 0.001013 |
| 24Mar2011 | 2118  | 936.48  | 27.86052 | 1 K.LNGGYEC chr2@119    | 3.51E-11 | 5.19E-04 |
| 24Mar2011 | 1966  | 741.39  | -9.64508 | 2 K.FPENRHI\ chr2@147   | 5.75E-11 | 0.001013 |
| 24Mar2011 | 5045  | 1075.06 | -6.79295 | 2 R.TCSK+14. chr2@125   | 3.73E-10 | 0.006774 |
| 24Mar2011 | 2891  | 434.24  | 13.9946  | 3 _RSNDQTI chr5@637     | 1.85E-11 | 0        |
| 24Mar2011 | 10003 | 802.41  | 12.28004 | 1 K.RDPNGSF chr2@109    | 1.33E-10 | 0.00196  |
| 24Mar2011 | 12807 | 634.84  | 6.410455 | 2 R.VDIGDILF Splice@chr | 4.79E-13 | 0        |
| 24Mar2011 | 8538  | 671.87  | -26.5383 | 2 T.FNIVHTQ Splice@chr  | 3.83E-10 | 0.005013 |
| 24Mar2011 | 7939  | 751.88  | -20.0772 | 2 K.ILNSCELP chr1@316   | 5.84E-10 | 0.007232 |
| 24Mar2011 | 2585  | 741.39  | -17.2291 | 2 K.QKSNWH chr5@122     | 1.10E-10 | 0.001185 |
| 24Mar2011 | 1493  | 510.3   | 12.8833  | 2 R.RHVAYVF chr1@147    | 6.40E-11 | 6.16E-04 |
| 24Mar2011 | 1578  | 510.3   | 12.8833  | 2 R.RHVAYVF chr1@147    | 6.54E-12 | 1.63E-04 |
| 24Mar2011 | 3395  | 423.26  | 23.30279 | 2 K.LGAETVV chr2@618    | 1.40E-10 | 0.00161  |
| 24Mar2011 | 14320 | 953.26  | 21.08789 | 4 _CSSFFFKL chr4@145    | 2.04E-10 | 0.002157 |
| 24Mar2011 | 11731 | 886.77  | -29.5706 | 3 G.FLFKSLC\ chr2@949   | 4.85E-10 | 0.006474 |
| 24Mar2011 | 1536  | 510.3   | 12.8833  | 2 R.RHVAYVF chr1@147    | 6.54E-12 | 1.63E-04 |

|           |       |         |          |                         |          |          |
|-----------|-------|---------|----------|-------------------------|----------|----------|
| 24Mar2011 | 1225  | 510.3   | 12.8833  | 2 R.RHVAYVF chr1@1479   | 6.40E-11 | 6.16E-04 |
| 24Mar2011 | 7851  | 671.37  | -24.0361 | 2 T.FNIVHTQ Splice@chr  | 3.81E-10 | 0.005013 |
| 24Mar2011 | 9537  | 675.81  | 14.83385 | 2 K.LDSM+15 Splice@chr  | 7.18E-10 | 0.009025 |
| 24Mar2011 | 1453  | 510.3   | 12.8833  | 2 R.RHVAYVF chr1@1479   | 1.31E-11 | 1.63E-04 |
| 24Mar2011 | 6238  | 616.33  | -16.7632 | 2 K.LSKSVIFQ chr3@2798  | 3.34E-10 | 0.004211 |
| 24Mar2011 | 4041  | 434.24  | 13.9946  | 3 _RSNDQTI chr5@6378    | 3.61E-10 | 0.004618 |
| 24Mar2011 | 9141  | 671.37  | -24.0361 | 2 T.FNIVHTQ Splice@chr  | 3.98E-10 | 0.005013 |
| 24Mar2011 | 833   | 464.24  | -7.11495 | 2 K.ETSFSTKk chr4@8236  | 5.23E-10 | 0.006995 |
| 24Mar2011 | 2891  | 936.48  | 27.86052 | 1 K.LNGGYEC chr2@1191   | 4.06E-11 | 6.16E-04 |
| 24Mar2011 | 10488 | 785.42  | 22.95449 | 1 _MPAWAF chr2@1115     | 1.61E-11 | 1.63E-04 |
| 24Mar2011 | 12759 | 634.84  | 6.410455 | 2 R.VDIGDILF Splice@chr | 3.11E-13 | 0        |
| 24Mar2011 | 8933  | 671.37  | -24.0361 | 2 T.FNIVHTQ Splice@chr  | 4.15E-10 | 0.005274 |
| 24Mar2011 | 9676  | 833.42  | -19.2103 | 2 _IIEPYVAM Splice@chr  | 9.23E-11 | 9.06E-04 |
| 24Mar2011 | 9431  | 858.48  | 6.006088 | 3 _LETGIKPI Splice@chr  | 8.68E-13 | 0        |
| 24Mar2011 | 1270  | 510.3   | 12.8833  | 2 R.RHVAYVF chr1@1479   | 1.21E-10 | 0.001185 |
| 24Mar2011 | 1616  | 510.3   | 12.8833  | 2 R.RHVAYVF chr1@1479   | 6.40E-11 | 6.16E-04 |
| 24Mar2011 | 3655  | 583.79  | -23.2497 | 2 R.YLAAAAC chr5@9265   | 6.52E-10 | 0.007721 |
| 24Mar2011 | 8433  | 1075.05 | -16.1169 | 2 R.TCSK+14. chr2@1255  | 2.99E-10 | 0.003382 |
| 24Mar2011 | 6850  | 825.96  | -15.1379 | 2 R.SARENKT Splice@chr  | 7.19E-11 | 7.64E-04 |
| 24Mar2011 | 1753  | 493.61  | 28.00299 | 3 _FQRHNLN chrX@1408    | 2.98E-10 | 0.003382 |
| 24Mar2011 | 13639 | 970.45  | -29.5364 | 3 _VACNKM Splice@chr    | 3.90E-10 | 0.005013 |
| 24Mar2011 | 10238 | 1056.56 | 28.0642  | 3 I.SRVEDDS Splice@chr  | 5.55E-15 | 0        |
| 24Mar2011 | 9941  | 622.33  | 9.587405 | 2 R.AK+14.01 chr2@4270  | 1.79E-10 | 0.001887 |
| 24Mar2011 | 12780 | 634.84  | 6.410455 | 2 R.VDIGDILF Splice@chr | 1.67E-11 | 1.63E-04 |
| 24Mar2011 | 5802  | 532.28  | 9.190877 | 2 K.TTEFPIAE chr5@1064  | 1.02E-10 | 0.001185 |
| 24Mar2011 | 12290 | 884.41  | -1.81927 | 3 R.YRVDLAF chr5@6435   | 2.86E-10 | 0.003257 |
| 24Mar2011 | 2686  | 741.39  | -17.2291 | 2 K.QKSNWH chr5@1229    | 2.35E-11 | 1.63E-04 |
| 24Mar2011 | 11096 | 991.04  | -8.04821 | 2 S.K+14.016 chr5@5228  | 3.92E-10 | 0.005013 |
| 24Mar2011 | 2635  | 741.39  | -17.2291 | 2 K.QKSNWH chr5@1229    | 9.40E-11 | 0.001054 |
| 24Mar2011 | 6544  | 674.91  | 13.82396 | 2 I.NIILHAIFH chr2@9529 | 7.08E-10 | 0.008772 |
| 24Mar2011 | 13611 | 962.8   | 19.96909 | 3 _GCSIVPIS Splice@chr  | 1.34E-11 | 1.63E-04 |
| 24Mar2011 | 13728 | 1147.24 | 4.705638 | 3 R.FQSAAIG Splice@chr  | 3.14E-16 | 0        |
| 24Mar2011 | 4665  | 455.25  | 8.8683   | 3 K.LEAKGGC chr5@1298   | 5.04E-10 | 0.006599 |
| 24Mar2011 | 14278 | 809.01  | -7.47824 | 2 R.FTTELLLL chr3@8986  | 3.74E-11 | 6.16E-04 |
| 24Mar2011 | 6979  | 1075.06 | -6.79295 | 2 R.TCSK+14. chr2@1255  | 1.30E-10 | 0.001328 |
| 24Mar2011 | 9767  | 753.96  | 0.162122 | 2 K.K+14.016 chr2@1375  | 1.53E-11 | 1.63E-04 |
| 24Mar2011 | 11268 | 742.88  | -6.21424 | 2 K.M+15.99 chr4@1648   | 2.69E-10 | 0.002843 |
| 24Mar2011 | 6250  | 509.8   | -23.773  | 2 R.SSVIMLIV chr2@5767  | 5.33E-11 | 6.16E-04 |
| 24Mar2011 | 3930  | 434.24  | 13.9946  | 3 _RSNDQTI chr5@6378    | 6.64E-10 | 0.007721 |
| 24Mar2011 | 4634  | 1025.61 | -11.6755 | 1 K.LGLGSGL chr5@4945   | 2.75E-11 | 1.63E-04 |
| 24Mar2011 | 2992  | 936.48  | 27.86052 | 1 K.LNGGYEC chr2@1191   | 7.48E-10 | 0.009799 |
| 24Mar2011 | 12758 | 730.93  | -11.0855 | 2 _FFHKVK+ chr5@2007    | 4.13E-10 | 0.005274 |
| 24Mar2011 | 12256 | 884.41  | -1.81927 | 3 R.YRVDLAF chr5@6435   | 2.15E-10 | 0.002291 |
| 24Mar2011 | 10282 | 1005.47 | -16.3827 | 2 K.KVELALW Splice@chr  | 1.63E-22 | 0        |
| 24Mar2011 | 11428 | 1143.88 | 13.05325 | 3 K.NMITGTS Splice@chr  | 2.88E-10 | 0.003257 |
| 24Mar2011 | 9896  | 622.33  | 9.587405 | 2 R.AK+14.01 chr2@4270  | 8.80E-11 | 9.06E-04 |
| 24Mar2011 | 9090  | 671.37  | -24.0361 | 2 T.FNIVHTQ Splice@chr  | 7.64E-10 | 0.009799 |

|           |       |         |          |                          |          |          |
|-----------|-------|---------|----------|--------------------------|----------|----------|
| 24Mar2011 | 1694  | 510.3   | 12.8833  | 2 R.RHVAYVF chr1@1479    | 6.40E-11 | 6.16E-04 |
| 24Mar2011 | 6183  | 616.33  | -16.7632 | 2 K.LSKSVIFQ chr3@2798   | 4.56E-10 | 0.006474 |
| 24Mar2011 | 1765  | 488.28  | 18.24649 | 2 K.INAEFVG chr4@4519    | 1.95E-10 | 0.002018 |
| 24Mar2011 | 10199 | 1141.62 | 4.816002 | 1 _._YLFDTITLE chr2@1007 | 5.17E-11 | 6.16E-04 |
| 24Mar2011 | 7109  | 626.31  | 6.247018 | 2 K.SEELMYN chr4@2673    | 1.19E-13 | 0        |
| 24Mar2011 | 1656  | 510.3   | 12.8833  | 2 R.RHVAYVF chr1@1479    | 6.40E-11 | 6.16E-04 |
| 24Mar2011 | 6363  | 400.75  | 5.038673 | 2 K.VEAATAI Splice@chr   | 3.57E-10 | 0.005835 |
| 24Mar2011 | 11119 | 785.42  | 22.95449 | 1 _._MPAWAF chr2@1115    | 2.29E-11 | 0        |
| 24Mar2011 | 4597  | 434.24  | 13.9946  | 3 _._RSNDQTI chr5@6378   | 1.35E-10 | 0.001938 |
| 24Mar2011 | 6991  | 830.39  | -18.1496 | 2 R.FEVFEIEC chr4@7299   | 5.69E-10 | 0.008862 |
| 24Mar2011 | 10432 | 753.96  | 0.162122 | 2 K.K+14.016 chr2@1375   | 1.74E-11 | 0        |
| 24Mar2011 | 8918  | 580.63  | 1.053017 | 3 K.MPNFRTI chr5@2689    | 1.88E-10 | 0.002214 |
| 24Mar2011 | 10071 | 858.48  | 6.006088 | 3 _._LETGIKPI Splice@chr | 1.26E-12 | 0        |
| 24Mar2011 | 1787  | 510.3   | 12.8833  | 2 R.RHVAYVF chr1@1479    | 6.54E-12 | 0        |
| 24Mar2011 | 11984 | 742.88  | -6.21424 | 2 K.M+15.99 chr4@1648    | 5.77E-10 | 0.009117 |
| 24Mar2011 | 12983 | 884.41  | -1.81927 | 3 R.YRVDLAF chr5@6435    | 5.07E-11 | 4.71E-04 |
| 24Mar2011 | 3260  | 741.38  | -23.1647 | 2 K.FPENRHI chr2@1477    | 1.65E-10 | 0.001938 |
| 24Mar2011 | 8222  | 604.33  | 18.58137 | 2 _._KDK+14.( chrX@1077  | 1.56E-10 | 0.001938 |
| 24Mar2011 | 7546  | 1075.05 | -16.1169 | 2 R.TCSK+14. chr2@1253   | 2.25E-10 | 0.002634 |
| 24Mar2011 | 11908 | 742.88  | -6.21424 | 2 K.M+15.99 chr4@1648    | 2.48E-10 | 0.002758 |
| 24Mar2011 | 12104 | 1143.87 | 4.220916 | 3 K.NMITGTS Splice@chr   | 9.89E-12 | 0        |
| 24Mar2011 | 8696  | 671.37  | -24.0361 | 2 T.FNIVHTQ Splice@chr   | 3.69E-10 | 0.005963 |
| 24Mar2011 | 11810 | 1182.56 | -9.918   | 3 K.NMITGTS Splice@chr   | 2.34E-11 | 1.66E-04 |
| 24Mar2011 | 12735 | 1064.2  | -10.2401 | 3 K.SGDAGIV Splice@chr   | 1.83E-10 | 0.002214 |
| 24Mar2011 | 10385 | 753.96  | 0.162122 | 2 K.K+14.016 chr2@1375   | 1.54E-10 | 0.001938 |
| 24Mar2011 | 7603  | 516.78  | 20.90941 | 2 L.EQGTAAT Splice@chr   | 3.91E-10 | 0.006371 |
| 24Mar2011 | 3191  | 741.38  | -23.1647 | 2 K.FPENRHI chr2@1477    | 3.00E-10 | 0.004295 |
| 24Mar2011 | 6814  | 1017.59 | -22.5744 | 1 R.SSVIMLIV chr2@5767   | 3.96E-10 | 0.006787 |
| 24Mar2011 | 12977 | 812.12  | 14.27915 | 3 A.EITEMLPi chr2@6588   | 4.64E-14 | 0        |
| 24Mar2011 | 10120 | 858.48  | 6.006088 | 3 _._LETGIKPI Splice@chr | 1.18E-11 | 0        |
| 24Mar2011 | 8757  | 748.73  | -12.625  | 3 R.LPSKENL chr4@5639    | 4.17E-10 | 0.00704  |
| 24Mar2011 | 2669  | 837.45  | -19.6495 | 1 K.TYIVGQR chr4@5607    | 5.37E-10 | 0.008603 |
| 24Mar2011 | 13304 | 783.45  | -3.51026 | 2 K.MLK+14.( chr5@1675   | 6.10E-10 | 0.009375 |
| 24Mar2011 | 10184 | 938.46  | 22.50833 | 2 R.ECSQSDS chr2@8876    | 6.23E-10 | 0.009633 |
| 24Mar2011 | 8588  | 671.37  | -24.0361 | 2 T.FNIVHTQ Splice@chr   | 5.60E-10 | 0.008726 |
| 24Mar2011 | 1984  | 510.3   | 12.8833  | 2 R.RHVAYVF chr1@1479    | 6.54E-12 | 0        |
| 24Mar2011 | 6812  | 509.8   | -23.773  | 2 R.SSVIMLIV chr2@5767   | 4.54E-11 | 4.71E-04 |
| 24Mar2011 | 3561  | 936.48  | 27.86052 | 1 K.LNGGYEC chr2@1191    | 8.54E-11 | 9.28E-04 |
| 24Mar2011 | 2031  | 510.3   | 12.8833  | 2 R.RHVAYVF chr1@1479    | 6.54E-12 | 0        |
| 24Mar2011 | 8529  | 671.37  | -24.0361 | 2 T.FNIVHTQ Splice@chr   | 2.71E-10 | 0.003329 |
| 24Mar2011 | 1838  | 510.3   | 12.8833  | 2 R.RHVAYVF chr1@1479    | 6.54E-12 | 0        |
| 24Mar2011 | 10025 | 858.48  | 6.006088 | 3 _._LETGIKPI Splice@chr | 1.57E-14 | 0        |
| 24Mar2011 | 14370 | 970.46  | -19.2078 | 3 _._VACNKM Splice@chr   | 6.69E-11 | 6.20E-04 |
| 24Mar2011 | 14461 | 1147.25 | 13.44098 | 3 R.FQSAAIG Splice@chr   | 5.84E-15 | 0        |
| 24Mar2011 | 3334  | 460.75  | -3.71898 | 2 K.IAECSVLK chrX@2064   | 1.42E-10 | 0.001938 |
| 24Mar2011 | 8213  | 583.82  | -28.5596 | 2 R.LVFPITFS chr1@2422   | 5.42E-10 | 0.008603 |
| 24Mar2011 | 10939 | 1005.47 | -16.3827 | 2 K.KVELALW Splice@chr   | 5.17E-23 | 0        |

|           |       |         |          |                         |          |          |
|-----------|-------|---------|----------|-------------------------|----------|----------|
| 24Mar2011 | 15107 | 1105.22 | -1.98989 | 3 K.LAFDDAI\ Splice@chr | 1.31E-14 | 0        |
| 24Mar2011 | 10584 | 622.33  | 9.587405 | 2 R.AK+14.01 chr2@4270  | 1.78E-10 | 0.002214 |
| 24Mar2011 | 1889  | 510.3   | 12.8833  | 2 R.RHVAYVF chr1@1479   | 6.54E-12 | 0        |
| 24Mar2011 | 3146  | 741.39  | -17.2291 | 2 K.QKSNWH chr5@1229    | 7.77E-11 | 6.20E-04 |
| 24Mar2011 | 10538 | 622.33  | 9.587405 | 2 R.AK+14.01 chr2@4270  | 2.42E-10 | 0.002758 |
| 24Mar2011 | 11436 | 747.39  | 13.7081  | 2 K.MLRFNE\ chr2@8359   | 2.20E-11 | 0        |
| 24Mar2011 | 6867  | 509.8   | -23.773  | 2 R.SSVIMLIV chr2@5767  | 6.69E-11 | 6.20E-04 |
| 24Mar2011 | 12728 | 798.15  | -11.5616 | 4 K.SGDAGIV Splice@chr  | 1.92E-12 | 0        |
| 24Mar2011 | 9651  | 713.38  | -5.25494 | 3 _DVGAILV Splice@chr   | 4.75E-10 | 0.007557 |
| 24Mar2011 | 1741  | 510.3   | 12.8833  | 2 R.RHVAYVF chr1@1479   | 6.54E-12 | 0        |
| 24Mar2011 | 7425  | 825.96  | -15.1379 | 2 R.SARENKT Splice@chr  | 3.89E-11 | 4.71E-04 |
| 24Mar2011 | 13861 | 968.13  | 18.26018 | 3 _GCSIVPIS Splice@chr  | 7.01E-12 | 0        |
| 24Mar2011 | 15004 | 809.01  | -7.47824 | 2 R.FTTELLLL chr3@8986  | 4.13E-11 | 4.71E-04 |
| 24Mar2011 | 15739 | 1051.88 | 25.1969  | 3 R.TTGVVLD Splice@chr  | 5.92E-11 | 0.001619 |
| 24Mar2011 | 14941 | 767.41  | -10.114  | 2 K.QLDFLVD chr4@1395   | 3.35E-10 | 0.007281 |
| 24Mar2011 | 22553 | 962.8   | 16.16136 | 3 _CSIRPISG Splice@chr  | 1.20E-11 | 4.22E-04 |
| 24Mar2011 | 23501 | 1175.12 | 6.371728 | 2 K.INWAVTI chr4@2890   | 2.61E-19 | 0        |
| 24Mar2011 | 3642  | 510.3   | 12.8833  | 2 R.RHVAYVF chr1@1479   | 1.28E-10 | 0.003903 |
| 24Mar2011 | 8917  | 1025.61 | -11.6755 | 1 K.LGLGSGL chr5@4945   | 1.16E-11 | 4.22E-04 |
| 24Mar2011 | 22712 | 1147.24 | 4.705638 | 3 R.FQSAAIG Splice@chr  | 4.27E-15 | 0        |
| 24Mar2011 | 18934 | 886.77  | -29.5706 | 3 G.FLFKSLC\ chr2@9496  | 5.96E-11 | 0.001619 |
| 24Mar2011 | 15176 | 858.47  | -5.67211 | 3 _LETGIKPI Splice@chr  | 3.26E-12 | 1.10E-04 |
| 24Mar2011 | 15798 | 622.33  | 9.587405 | 2 R.AK+14.01 chr2@4270  | 1.75E-10 | 0.004628 |
| 24Mar2011 | 2169  | 1115.55 | -23.2926 | 1 R.RMPPAA chr2@1507    | 5.05E-10 | 0.009875 |
| 24Mar2011 | 6204  | 741.38  | -23.1647 | 2 K.FPENRHI\ chr2@1477  | 4.76E-10 | 0.009662 |
| 24Mar2011 | 5916  | 439.75  | -7.44254 | 2 K.LYGEVGL chrX@2908   | 4.31E-10 | 0.009129 |
| 24Mar2011 | 20207 | 754.09  | 18.40716 | 3 _TLLEALD\ Splice@chr  | 1.20E-11 | 4.22E-04 |
| 24Mar2011 | 18561 | 1039.03 | -2.11678 | 2 R.NSVANIG Splice@chr  | 3.77E-20 | 0        |
| 24Mar2011 | 24180 | 742.35  | -8.7359  | 1 R.RTSASYG Splice@chr  | 3.35E-10 | 0.007281 |
| 24Mar2011 | 22728 | 860.69  | 14.08015 | 4 R.FQSAAIG Splice@chr  | 8.79E-11 | 0.002703 |
| 24Mar2011 | 14815 | 607     | -9.70672 | 3 I.NRFNISLK chrX@1250  | 1.39E-10 | 0.004063 |
| 24Mar2011 | 11947 | 1075.05 | -16.1169 | 2 R.TCSK+14. chr2@1255  | 1.07E-10 | 0.002933 |
| 24Mar2011 | 5863  | 439.75  | -7.44254 | 2 K.LYGEVGL chrX@2908   | 1.89E-10 | 0.004703 |
| 24Mar2011 | 6741  | 416.73  | -24.0304 | 2 R.ISLANASF Splice@chr | 2.31E-10 | 0.005601 |
| 24Mar2011 | 18350 | 732.07  | 19.51873 | 3 R.ATDDWII Splice@chr  | 2.18E-10 | 0.005442 |
| 24Mar2011 | 15938 | 1153.22 | -26.2628 | 3 F.EGIRTGG Splice@chr  | 8.93E-14 | 0        |
| 24Mar2011 | 6550  | 936.48  | 27.86052 | 1 K.LNGGYEC chr2@1191   | 3.47E-11 | 8.83E-04 |
| 24Mar2011 | 15481 | 833.42  | -19.2103 | 2 _IIEPYVAV Splice@chr  | 1.54E-11 | 6.10E-04 |
| 24Mar2011 | 18069 | 742.88  | -6.21424 | 2 K.M+15.99 chr4@1648   | 3.68E-10 | 0.007762 |
| 24Mar2011 | 8093  | 434.24  | 13.9946  | 3 _RSNDQTI chr5@6378    | 3.76E-10 | 0.008174 |
| 24Mar2011 | 14946 | 833.93  | -9.2006  | 2 _IIEPYVAV Splice@chr  | 3.13E-10 | 0.006803 |
| 24Mar2011 | 16518 | 1004.96 | -24.6213 | 2 K.KVELALW Splice@chr  | 1.45E-18 | 0        |
| 24Mar2011 | 17005 | 743.39  | -25.8721 | 2 R.LKQK+14 chr5@1607   | 2.91E-10 | 0.006738 |
| 24Mar2011 | 682   | 548.28  | -18.0669 | 2 P.M+15.99 Splice@chr  | 2.26E-10 | 0.005522 |
| 24Mar2011 | 3393  | 858.49  | -10.5443 | 1 _TVASRAP chrX@7067    | 1.02E-10 | 0.002933 |
| 24Mar2011 | 20888 | 634.83  | -9.39461 | 2 R.VDIGDILF Splice@chr | 9.95E-13 | 1.10E-04 |
| 24Mar2011 | 3584  | 510.3   | 12.8833  | 2 R.RHVAYVF chr1@1479   | 6.54E-12 | 1.10E-04 |

|           |       |         |          |                          |          |          |
|-----------|-------|---------|----------|--------------------------|----------|----------|
| 24Mar2011 | 20023 | 1007.86 | 15.19559 | 3 R.CWNRRA Splice@chr    | 4.69E-12 | 1.10E-04 |
| 24Mar2011 | 2223  | 1115.55 | -23.2926 | 1 R.RMPPAA chr2@1507     | 4.72E-10 | 0.0095   |
| 24Mar2011 | 11748 | 825.46  | -13.1033 | 2 R.SARENKT Splice@chr   | 3.10E-10 | 0.006803 |
| 24Mar2011 | 19870 | 884.41  | -1.81927 | 3 R.YRVDLAF chr5@6435    | 1.09E-11 | 3.20E-04 |
| 24Mar2011 | 15008 | 833.93  | -9.2006  | 2 _..IIEPYVAV Splice@chr | 2.12E-10 | 0.005442 |
| 24Mar2011 | 4384  | 545.3   | -26.5421 | 2 K.RTSTQGL chr3@1135    | 1.41E-10 | 0.00412  |
| 24Mar2011 | 12931 | 730.38  | -23.8587 | 3 K.DNVVNTI chr3@7825    | 3.18E-10 | 0.006875 |
| 24Mar2011 | 12066 | 626.3   | -9.76097 | 2 K.SEELMYN chr4@2675    | 1.25E-13 | 0        |
| 24Mar2011 | 16531 | 1056.56 | 28.0642  | 3 I.SRVEDDS Splice@chr   | 2.71E-12 | 1.10E-04 |
| 24Mar2011 | 8858  | 1025.61 | -11.6755 | 1 K.LGLGSGL chr5@4945    | 1.24E-11 | 4.22E-04 |
| 24Mar2011 | 11692 | 825.46  | -13.1033 | 2 R.SARENKT Splice@chr   | 1.17E-10 | 0.003279 |
| 24Mar2011 | 16732 | 785.42  | 22.95449 | 1 _..MPAWAF chr2@1115    | 2.85E-11 | 7.91E-04 |
| 24Mar2011 | 22991 | 663.89  | 0.276226 | 2 P.ARSRDISI chr5@1515   | 1.77E-10 | 0.004628 |
| 24Mar2011 | 17257 | 747.39  | 13.7081  | 2 K.MLRFNEI chr2@8355    | 3.94E-10 | 0.008748 |
| 24Mar2011 | 12959 | 705.83  | -3.72364 | 2 M.PSMEEV chr5@4890     | 2.00E-15 | 0        |
| 24Mar2011 | 15357 | 762.42  | 3.25006  | 2 _..MK+14.0 chr4@7745   | 3.90E-10 | 0.008583 |
| 24Mar2011 | 22760 | 860.68  | 2.433027 | 4 R.FQSAAIG Splice@chr   | 5.94E-13 | 1.10E-04 |
| 24Mar2011 | 18130 | 742.88  | -6.21424 | 2 K.M+15.99 chr4@1648    | 4.92E-10 | 0.009802 |
| 24Mar2011 | 8803  | 1025.61 | -11.6755 | 1 K.LGLGSGL chr5@4945    | 1.86E-11 | 6.10E-04 |
| 24Mar2011 | 13761 | 924.45  | -15.7965 | 2 R.MSQEVA Splice@chr    | 1.87E-13 | 0        |
| 24Mar2011 | 19415 | 672.58  | -19.3267 | 5 R.KVSNVQI chr5@8812    | 4.85E-10 | 0.009802 |
| 24Mar2011 | 16347 | 1141.62 | 4.816002 | 1 _..YLFDITLE chr2@1007  | 1.04E-10 | 0.002933 |
| 24Mar2011 | 16792 | 785.42  | 22.95449 | 1 _..MPAWAF chr2@1115    | 2.52E-11 | 7.02E-04 |
| 24Mar2011 | 16232 | 965.76  | 6.091444 | 4 R.KTSSCQK chr5@2085    | 3.44E-10 | 0.007362 |
| 24Mar2011 | 15907 | 622.33  | 9.587405 | 2 R.AK+14.01 chr2@4270   | 6.11E-11 | 0.001804 |
| 24Mar2011 | 20923 | 634.83  | -9.39461 | 2 R.VDIGDILF Splice@chr  | 6.04E-13 | 1.10E-04 |
| 24Mar2011 | 14617 | 760.92  | 4.096271 | 2 R.FLIDISCVI chr1@4425  | 2.67E-12 | 1.10E-04 |
| 24Mar2011 | 15634 | 753.95  | -13.1319 | 2 K.K+14.016 chr2@1375   | 1.88E-11 | 6.10E-04 |
| 24Mar2011 | 4234  | 735.33  | -27.5112 | 2 K.YGHANVI chr1@1065    | 2.75E-10 | 0.006576 |
| 24Mar2011 | 14869 | 607     | -9.70672 | 3 I.NRFNISK chrX@1250    | 9.13E-11 | 0.002787 |
| 24Mar2011 | 16465 | 1005.46 | -26.2921 | 2 K.KVELALV Splice@chr   | 5.48E-22 | 0        |
| 24Mar2011 | 15123 | 858.47  | -5.67211 | 3 _..LETGIKPI Splice@chr | 7.70E-12 | 2.15E-04 |
| 24Mar2011 | 22743 | 1147.24 | 4.705638 | 3 R.FQSAAIG Splice@chr   | 7.54E-14 | 0        |
| 24Mar2011 | 9357  | 665.88  | -25.2158 | 2 _..ILYYFLKIE chr3@2365 | 4.74E-10 | 0.0095   |
| 24Mar2011 | 15573 | 753.95  | -13.1319 | 2 K.K+14.016 chr2@1375   | 6.13E-11 | 0.001804 |
| 24Mar2011 | 507   | 748.36  | 16.41564 | 1 R.ATAGDGI chr3@5845    | 4.69E-12 | 1.10E-04 |
| 24Mar2011 | 21336 | 491.64  | 23.22207 | 3 R.LLLDKPLF Splice@chr  | 4.83E-10 | 0.009745 |
| 24Mar2011 | 21588 | 968.12  | 7.825792 | 3 _..GCSIVPIS Splice@chr | 1.69E-10 | 0.004461 |
| 24Mar2011 | 20977 | 634.83  | -9.39461 | 2 R.VDIGDILF Splice@chr  | 2.06E-13 | 1.10E-04 |
| 24Mar2011 | 10533 | 622.33  | 9.587405 | 2 R.AK+14.01 chr2@4270   | 1.82E-10 | 0.001983 |
| 24Mar2011 | 7761  | 873.45  | 11.16623 | 2 S.IM+15.99 Splice@chr  | 6.09E-10 | 0.007628 |
| 24Mar2011 | 2409  | 744.38  | -27.5047 | 1 K.DGNAVLFI chr5@8904   | 2.10E-10 | 0.002391 |
| 24Mar2011 | 3095  | 741.39  | -17.2291 | 2 K.QKSNWH chr5@1225     | 9.54E-11 | 8.78E-04 |
| 24Mar2011 | 10970 | 1005.47 | -16.3827 | 2 K.KVELALV Splice@chr   | 9.36E-23 | 0        |
| 24Mar2011 | 1800  | 510.3   | 12.8833  | 2 R.RHVAYVF chr1@1475    | 6.54E-12 | 1.52E-04 |
| 24Mar2011 | 14660 | 1147.25 | 13.44098 | 3 R.FQSAAIG Splice@chr   | 3.09E-13 | 0        |
| 24Mar2011 | 4377  | 434.24  | 13.9946  | 3 _..RSNDQTI chr5@6378   | 4.55E-10 | 0.006527 |

|           |       |         |          |                          |          |          |
|-----------|-------|---------|----------|--------------------------|----------|----------|
| 24Mar2011 | 10369 | 753.96  | 0.162122 | 2 K.K+14.016 chr2@1375   | 2.93E-11 | 1.52E-04 |
| 24Mar2011 | 8688  | 671.37  | -24.0361 | 2 T.FNIVHTQ Splice@chr   | 6.19E-10 | 0.007737 |
| 24Mar2011 | 12265 | 1143.87 | 4.220916 | 3 K.NMITGTS Splice@chr   | 4.46E-12 | 1.52E-04 |
| 24Mar2011 | 1847  | 510.3   | 12.8833  | 2 R.RHVAYVF chr1@1475    | 6.54E-12 | 1.52E-04 |
| 24Mar2011 | 3194  | 741.39  | -17.2291 | 2 K.QKSNWH chr5@1225     | 7.41E-11 | 8.78E-04 |
| 24Mar2011 | 13128 | 884.41  | -1.81927 | 3 R.YRVDLAF chr5@6435    | 5.93E-10 | 0.007628 |
| 24Mar2011 | 9030  | 924.46  | -4.95707 | 2 R.MSQEVA Splice@chr    | 3.72E-14 | 0        |
| 24Mar2011 | 15219 | 809.02  | 4.909957 | 2 R.FTTELLLL chr3@8986   | 3.90E-11 | 1.52E-04 |
| 24Mar2011 | 12022 | 742.88  | -6.21424 | 2 K.M+15.99 chr4@1648    | 6.72E-10 | 0.008887 |
| 24Mar2011 | 8377  | 671.37  | -24.0361 | 2 T.FNIVHTQ Splice@chr   | 2.06E-10 | 0.002115 |
| 24Mar2011 | 6982  | 830.39  | -18.1496 | 2 R.FEVFEIEC chr4@7295   | 5.71E-10 | 0.007531 |
| 24Mar2011 | 10413 | 753.96  | 0.162122 | 2 K.K+14.016 chr2@1375   | 1.37E-11 | 1.52E-04 |
| 24Mar2011 | 13447 | 783.45  | -3.51026 | 2 K.MLKK+14 chr5@1675    | 6.75E-10 | 0.009146 |
| 24Mar2011 | 7300  | 546.81  | -27.0613 | 2 R.ITIIASATF Splice@chr | 5.27E-10 | 0.007285 |
| 24Mar2011 | 13423 | 783.45  | -3.51026 | 2 K.MLKK+14 chr5@1675    | 5.95E-10 | 0.007628 |
| 24Mar2011 | 11167 | 785.42  | 22.95449 | 1 _.MPAWAF chr2@1115     | 1.74E-11 | 1.52E-04 |
| 24Mar2011 | 10174 | 653.89  | -9.62894 | 2 K.QINLKLQ chr2@1024    | 3.99E-10 | 0.005894 |
| 24Mar2011 | 14379 | 959.54  | 18.06294 | 2 Y.NNCKLNS chrX@1250    | 1.75E-10 | 0.001848 |
| 24Mar2011 | 11703 | 722.45  | -4.95112 | 2 R.RK+14.01 Splice@chr  | 6.87E-10 | 0.009268 |
| 24Mar2011 | 1932  | 510.3   | 12.8833  | 2 R.RHVAYVF chr1@1475    | 6.54E-12 | 1.52E-04 |
| 24Mar2011 | 10580 | 622.33  | 9.587405 | 2 R.AK+14.01 chr2@4270   | 6.53E-10 | 0.008373 |
| 24Mar2011 | 3144  | 741.39  | -17.2291 | 2 K.QKSNWH chr5@1225     | 5.60E-11 | 3.02E-04 |
| 24Mar2011 | 13633 | 634.84  | 6.410455 | 2 R.VDIGDILF Splice@chr  | 2.68E-12 | 1.52E-04 |
| 24Mar2011 | 9828  | 607     | -9.70672 | 3 I.NRFNISK chrX@1250    | 1.49E-10 | 0.001293 |
| 24Mar2011 | 1978  | 510.3   | 12.8833  | 2 R.RHVAYVF chr1@1475    | 6.67E-11 | 8.78E-04 |
| 24Mar2011 | 10089 | 762.43  | 16.40509 | 2 _.MK+14.0 chr4@7745    | 3.38E-10 | 0.004961 |
| 24Mar2011 | 9887  | 833.93  | -9.2006  | 2 _.IIEPYVAV Splice@chr  | 4.59E-10 | 0.00678  |
| 24Mar2011 | 1348  | 464.24  | -7.11495 | 2 K.ETSFSTKk chr4@8236   | 5.43E-10 | 0.007531 |
| 24Mar2011 | 8460  | 751.88  | -20.0772 | 2 K.ILNSCELP chr1@3164   | 2.94E-10 | 0.004435 |
| 24Mar2011 | 1753  | 510.3   | 12.8833  | 2 R.RHVAYVF chr1@1475    | 1.21E-10 | 0.001013 |
| 24Mar2011 | 12093 | 742.88  | -6.21424 | 2 K.M+15.99 chr4@1648    | 6.68E-10 | 0.008887 |
| 24Mar2011 | 6037  | 431.74  | 5.455516 | 2 _.PIQDVYK Splice@chr   | 5.91E-10 | 0.007628 |
| 24Mar2011 | 7434  | 825.46  | -13.1033 | 2 R.SARENKT Splice@chr   | 3.74E-10 | 0.005626 |
| 24Mar2011 | 9938  | 833.93  | -9.2006  | 2 _.IIEPYVAV Splice@chr  | 3.25E-10 | 0.004961 |
| 24Mar2011 | 8329  | 671.37  | -24.0361 | 2 T.FNIVHTQ Splice@chr   | 2.30E-10 | 0.002803 |
| 24Mar2011 | 12054 | 742.88  | -6.21424 | 2 K.M+15.99 chr4@1648    | 4.08E-10 | 0.006275 |
| 24Mar2011 | 3378  | 936.48  | 27.86052 | 1 K.LNGGYEC chr2@1191    | 5.75E-11 | 3.02E-04 |
| 24Mar2011 | 12129 | 742.88  | -6.21424 | 2 K.M+15.99 chr4@1648    | 3.32E-10 | 0.004961 |
| 24Mar2011 | 2027  | 510.3   | 12.8833  | 2 R.RHVAYVF chr1@1475    | 6.84E-12 | 1.52E-04 |
| 24Mar2011 | 9026  | 616.64  | -9.1871  | 3 R.MSQEVA Splice@chr    | 1.03E-12 | 0        |
| 24Mar2011 | 9842  | 833.93  | -9.2006  | 2 _.IIEPYVAV Splice@chr  | 9.25E-11 | 8.78E-04 |
| 24Mar2011 | 4429  | 434.24  | 13.9946  | 3 _.RSNDQTI chr5@6378    | 6.72E-11 | 8.78E-04 |
| 24Mar2011 | 8285  | 671.37  | -24.0361 | 2 T.FNIVHTQ Splice@chr   | 5.72E-10 | 0.007628 |
| 24Mar2011 | 12294 | 1143.87 | 4.220916 | 3 K.NMITGTS Splice@chr   | 6.93E-10 | 0.009648 |
| 24Mar2011 | 3047  | 741.39  | -17.2291 | 2 K.QKSNWH chr5@1225     | 1.27E-11 | 1.52E-04 |
| 24Mar2011 | 7518  | 1075.06 | -6.79295 | 2 R.TCSK+14. chr2@1255   | 1.26E-10 | 0.001013 |
| 24Mar2011 | 8426  | 671.37  | -24.0361 | 2 T.FNIVHTQ Splice@chr   | 5.35E-10 | 0.00741  |

|           |       |         |          |                         |          |          |
|-----------|-------|---------|----------|-------------------------|----------|----------|
| 24Mar2011 | 5461  | 548.84  | -21.1679 | 2 R.LKRNTPV Splice@chr  | 1.49E-11 | 1.52E-04 |
| 24Mar2011 | 7389  | 825.97  | -3.07095 | 2 R.SARENKT Splice@chr  | 5.22E-11 | 1.52E-04 |
| 24Mar2011 | 2075  | 510.3   | 12.8833  | 2 R.RHVAYVF chr1@1479   | 6.54E-12 | 1.52E-04 |
| 24Mar2011 | 13662 | 634.84  | 6.410455 | 2 R.VDIGDILF Splice@chr | 5.01E-12 | 1.52E-04 |
| 24Mar2011 | 10331 | 753.96  | 0.162122 | 2 K.K+14.016 chr2@1379  | 1.24E-10 | 0.001013 |
| 24Mar2011 | 9027  | 634.83  | -9.39461 | 2 R.VDIGDILF Splice@chr | 2.00E-12 | 0        |
| 24Mar2011 | 970   | 510.3   | 12.8833  | 2 R.RHVAYVF chr1@1479   | 6.54E-12 | 4.71E-04 |
| 24Mar2011 | 3885  | 530.02  | -19.8939 | 3 A.HVNIIIVI chrX@2068  | 4.75E-10 | 0.008813 |
| 24Mar2011 | 2259  | 434.24  | 13.9946  | 3 _RSNDQTI chr5@6378    | 1.15E-10 | 0.002091 |
| 24Mar2011 | 1600  | 741.38  | -23.1647 | 2 K.FPENRHI chr2@1477   | 3.64E-10 | 0.006523 |
| 24Mar2011 | 1004  | 510.3   | 12.8833  | 2 R.RHVAYVF chr1@1479   | 6.40E-11 | 0.001725 |
| 24Mar2011 | 6290  | 858.48  | 6.006088 | 3 _LETGIKPI Splice@chr  | 1.57E-12 | 0        |
| 24Mar2011 | 6601  | 622.33  | 9.587405 | 2 R.AK+14.01 chr2@4270  | 5.24E-10 | 0.009713 |
| 24Mar2011 | 7331  | 747.39  | 13.7081  | 2 K.MLRFNE chr2@8359    | 2.00E-10 | 0.003677 |
| 24Mar2011 | 9534  | 959.04  | 19.81385 | 2 Y.NNCKLNS chrX@1250   | 5.25E-10 | 0.009713 |
| 24Mar2011 | 3956  | 509.8   | -23.773  | 2 R.SSVIMLIV chr2@5767  | 3.76E-11 | 0.001539 |
| 24Mar2011 | 822   | 401.74  | -8.14847 | 2 R.AIGLVSSF chr2@1017  | 1.99E-10 | 0.003677 |
| 24Mar2011 | 8570  | 884.41  | -1.81927 | 3 R.YRVDLAF chr5@6439   | 8.38E-11 | 0.001902 |
| 24Mar2011 | 2668  | 717.89  | -17.2831 | 2 K.LRGWNK chr3@8881    | 1.42E-10 | 0.002285 |
| 24Mar2011 | 5398  | 833.41  | -5.13266 | 2 _IDM+15.9 chrX@3237   | 9.88E-11 | 0.001902 |
| 24Mar2011 | 1199  | 510.3   | 12.8833  | 2 R.RHVAYVF chr1@1479   | 7.05E-11 | 0.001725 |
| 24Mar2011 | 4422  | 1075.05 | -16.1169 | 2 R.TCSK+14. chr2@1253  | 4.42E-10 | 0.008237 |
| 24Mar2011 | 5737  | 772.39  | -25.873  | 2 R.QFVEVH chr3@6909    | 3.37E-10 | 0.006357 |
| 24Mar2011 | 6888  | 1005.47 | -16.3827 | 2 K.KVELALV Splice@chr  | 3.68E-22 | 0        |
| 24Mar2011 | 3953  | 616.33  | -16.7632 | 2 K.LSKSVIFQ chr3@2798  | 3.72E-10 | 0.006523 |
| 24Mar2011 | 3910  | 509.8   | -23.773  | 2 R.SSVIMLIV chr2@5767  | 6.52E-11 | 0.001725 |
| 24Mar2011 | 8381  | 987.5   | -5.85708 | 3 K.KYLFLDNI chr4@1288  | 2.82E-10 | 0.005008 |
| 24Mar2011 | 7044  | 785.42  | 22.95449 | 1 _MPAWAF chr2@1119     | 1.61E-11 | 4.71E-04 |
| 24Mar2011 | 1168  | 510.28  | -26.3658 | 2 R.RHVAYVF chr1@1479   | 2.76E-10 | 0.005008 |
| 24Mar2011 | 7561  | 722.45  | -4.95112 | 2 R.RK+14.01 Splice@chr | 4.92E-10 | 0.00919  |
| 24Mar2011 | 4509  | 626.3   | -9.76097 | 2 K.SEELMYN chr4@2673   | 1.99E-13 | 0        |
| 24Mar2011 | 6452  | 744.39  | 26.99177 | 2 L.FTENLTT chr5@1256   | 1.47E-10 | 0.002689 |
| 24Mar2011 | 1521  | 741.38  | -23.1647 | 2 K.FPENRHI chr2@1477   | 6.33E-11 | 0.001725 |
| 24Mar2011 | 7087  | 785.42  | 22.95449 | 1 _MPAWAF chr2@1119     | 1.61E-11 | 4.71E-04 |
| 24Mar2011 | 4469  | 1075.05 | -16.1169 | 2 R.TCSK+14. chr2@1253  | 1.85E-10 | 0.003485 |
| 24Mar2011 | 9007  | 634.83  | -9.39461 | 2 R.VDIGDILF Splice@chr | 5.12E-12 | 4.71E-04 |
| 24Mar2011 | 6580  | 1153.22 | -26.2628 | 3 F.EGIRTTG Splice@chr  | 8.16E-12 | 4.71E-04 |
| 24Mar2011 | 7157  | 622.33  | 9.587405 | 2 R.AK+14.01 chr2@4270  | 5.46E-10 | 0.007589 |
| 24Mar2011 | 4972  | 1075.06 | -6.79295 | 2 R.TCSK+14. chr2@1253  | 1.74E-10 | 0.002338 |
| 24Mar2011 | 5932  | 606.35  | 4.290517 | 2 C.AK+14.01 chr2@2907  | 5.86E-10 | 0.008647 |
| 24Mar2011 | 4915  | 825.46  | -13.1033 | 2 R.SARENKT Splice@chr  | 3.78E-11 | 0        |
| 24Mar2011 | 1804  | 741.39  | -17.2291 | 2 K.QKSNWH chr5@1229    | 1.55E-10 | 0.002129 |
| 24Mar2011 | 4726  | 897.42  | -27.6753 | 3 _QVREMH Splice@chr    | 6.30E-10 | 0.009453 |
| 24Mar2011 | 5602  | 705.84  | 10.47814 | 2 M.PSMEEV chr5@4890    | 6.11E-14 | 0        |
| 24Mar2011 | 6798  | 858.48  | 6.006088 | 3 _LETGIKPI Splice@chr  | 1.12E-11 | 0        |
| 24Mar2011 | 5680  | 671.37  | -24.0361 | 2 T.FNIVHTQ Splice@chr  | 3.58E-10 | 0.005236 |
| 24Mar2011 | 7112  | 622.33  | 9.587405 | 2 R.AK+14.01 chr2@4270  | 1.69E-10 | 0.002338 |

|           |       |         |          |                          |          |          |
|-----------|-------|---------|----------|--------------------------|----------|----------|
| 24Mar2011 | 4674  | 897.42  | -27.6753 | 3 _..QVREMH Splice@chr   | 3.35E-10 | 0.005024 |
| 24Mar2011 | 6714  | 833.93  | -9.2006  | 2 _..IIEPYVAV Splice@chr | 5.82E-11 | 0        |
| 24Mar2011 | 5083  | 626.31  | 6.247018 | 2 K.SEELMYN chr4@2675    | 1.17E-13 | 0        |
| 24Mar2011 | 5300  | 657.04  | -26.9179 | 3 R.GNVRK+1 chrX@7490    | 1.23E-11 | 0        |
| 24Mar2011 | 4476  | 509.8   | -23.773  | 2 R.SSVIMLIV chr2@5767   | 6.19E-11 | 0        |
| 24Mar2011 | 2802  | 434.24  | 13.9946  | 3 _..RSNDQTI chr5@6378   | 6.52E-10 | 0.009453 |
| 24Mar2011 | 10166 | 1147.25 | 13.44098 | 3 R.FQSAAIG Splice@chr   | 7.25E-14 | 0        |
| 24Mar2011 | 1926  | 741.39  | -17.2291 | 2 K.QKSNWH chr5@1229     | 1.07E-11 | 0        |
| 24Mar2011 | 7827  | 747.39  | 13.7081  | 2 K.MLRFNEC chr2@8355    | 1.50E-10 | 0.001896 |
| 24Mar2011 | 1887  | 741.39  | -17.2291 | 2 K.QKSNWH chr5@1229     | 1.76E-10 | 0.002338 |
| 24Mar2011 | 7547  | 785.42  | 22.95449 | 1 _..MPAWAF chr2@1115    | 2.29E-11 | 0        |
| 24Mar2011 | 4869  | 825.97  | -3.07095 | 2 R.SARENKT Splice@chr   | 7.45E-11 | 2.45E-04 |
| 24Mar2011 | 1842  | 741.39  | -17.2291 | 2 K.QKSNWH chr5@1229     | 1.03E-11 | 0        |
| 24Mar2011 | 7417  | 1005.47 | -16.3827 | 2 K.KVELALW Splice@chr   | 1.20E-19 | 0        |
| 24Mar2011 | 4359  | 1025.61 | -11.6755 | 1 K.LGLGSGL chr5@4945    | 1.01E-11 | 0.001973 |
| 24Mar2011 | 4270  | 1025.61 | -11.6755 | 1 K.LGLGSGL chr5@4945    | 4.32E-12 | 0        |
| 24Mar2011 | 2576  | 936.48  | 27.86052 | 1 K.LNGGYEC chr2@1191    | 1.75E-11 | 0.002618 |
| 24Mar2011 | 14783 | 1147.25 | 13.44098 | 3 R.FQSAAIG Splice@chr   | 1.26E-14 | 0        |
| 24Mar2011 | 12207 | 1003.18 | 7.145987 | 3 R.CWNRRA Splice@chr    | 1.04E-11 | 0.001973 |
| 24Mar2011 | 8965  | 858.48  | 6.006088 | 3 _..LETGIKPI Splice@chr | 1.30E-10 | 0.007392 |
| 24Mar2011 | 9277  | 823.93  | 0.706339 | 2 A.LYEYLFNI Splice@chr  | 1.63E-16 | 0        |
| 24Mar2011 | 3249  | 583.79  | -23.2497 | 2 R.YLAAAAC chr5@9265    | 1.26E-10 | 0.007392 |
| 24Mar2011 | 2622  | 936.48  | 27.86052 | 1 K.LNGGYEC chr2@1191    | 2.62E-11 | 0.002618 |
| 24Mar2011 | 1313  | 510.3   | 12.8833  | 2 R.RHVAYVF chr1@1479    | 6.54E-12 | 8.21E-04 |
| 24Mar2011 | 9322  | 823.93  | 0.706339 | 2 A.LYEYLFNI Splice@chr  | 1.12E-14 | 0        |
| 24Mar2011 | 1278  | 510.3   | 12.8833  | 2 R.RHVAYVF chr1@1479    | 7.05E-11 | 0.005534 |
| 24Mar2011 | 2378  | 741.38  | -23.1647 | 2 K.FPENRHLI chr2@1477   | 1.65E-10 | 0.008934 |
| 24Mar2011 | 1250  | 510.3   | 12.8833  | 2 R.RHVAYVF chr1@1479    | 1.31E-11 | 0.002618 |
| 24Mar2011 | 9062  | 938.46  | 22.50833 | 2 R.ECSQSDS chr2@8876    | 7.92E-11 | 0.005534 |
| 24Mar2011 | 9008  | 858.47  | -5.67211 | 3 _..LETGIKPI Splice@chr | 5.56E-11 | 0.003908 |
| 24Mar2011 | 3300  | 583.79  | -23.2497 | 2 R.YLAAAAC chr5@9265    | 1.46E-10 | 0.008008 |
| 24Mar2011 | 2292  | 741.39  | -17.2291 | 2 K.QKSNWH chr5@1229     | 2.17E-11 | 0.003396 |
| 24Mar2011 | 8816  | 785.42  | 22.95449 | 1 _..MPAWAF chr2@1115    | 2.73E-11 | 0.004408 |
| 24Mar2011 | 2261  | 741.39  | -17.2291 | 2 K.QKSNWH chr5@1229     | 9.26E-11 | 0.007121 |
| 24Mar2011 | 8120  | 823.93  | 0.706339 | 2 A.LYEYLFNI Splice@chr  | 1.46E-16 | 0        |
| 24Mar2011 | 10799 | 1003.19 | 17.13413 | 3 R.CWNRRA Splice@chr    | 1.28E-11 | 0.003396 |
| 24Mar2011 | 3837  | 1025.61 | -11.6755 | 1 K.LGLGSGL chr5@4945    | 7.01E-12 | 0        |
| 24Mar2011 | 1310  | 510.3   | 12.8833  | 2 R.RHVAYVF chr1@1479    | 1.33E-11 | 0.003396 |
| 24Mar2011 | 2492  | 936.48  | 27.86052 | 1 K.LNGGYEC chr2@1191    | 3.99E-11 | 0.004857 |
| 24Mar2011 | 8080  | 823.43  | 2.745922 | 2 A.LYEYLFNI Splice@chr  | 9.62E-16 | 0        |
| 24Mar2011 | 1239  | 510.28  | -26.3658 | 2 R.RHVAYVF chr1@1479    | 1.31E-11 | 0.003396 |
| 24Mar2011 | 845   | 452.23  | -1.48793 | 2 R.SGEPLSA Splice@chr   | 1.99E-11 | 0.00104  |
| 24Mar2011 | 5025  | 1017.59 | -22.5744 | 1 R.SSVIMLIV chr2@5767   | 1.88E-11 | 0.00104  |
| 24Mar2011 | 3268  | 533.82  | 16.26677 | 2 K.TNIYTILTI chr5@1329  | 2.32E-10 | 0.009615 |
| 24Mar2011 | 5067  | 509.3   | -20.473  | 2 R.SSVIMLIV chr2@5767   | 9.30E-11 | 0.005873 |
| 24Mar2011 | 2215  | 741.38  | -23.1647 | 2 K.FPENRHLI chr2@1477   | 2.25E-10 | 0.009615 |
| 24Mar2011 | 8747  | 983.47  | 6.336758 | 2 R.SFSTIPDS Splice@chr  | 4.05E-13 | 0        |

|           |       |         |          |                         |          |          |
|-----------|-------|---------|----------|-------------------------|----------|----------|
| 24Mar2011 | 10733 | 634.83  | -9.39461 | 2 R.VDIGDILF Splice@chr | 2.00E-12 | 0        |
| 24Mar2011 | 10714 | 634.84  | 6.410455 | 2 R.VDIGDILF Splice@chr | 8.14E-13 | 0        |
| 24Mar2011 | 8457  | 1182.56 | -21.0399 | 1 R.RFAENQI chr5@1779   | 1.85E-11 | 0.00104  |
| 24Mar2011 | 11350 | 860.69  | 14.08015 | 4 R.FQSAAIG Splice@chr  | 1.15E-12 | 0        |
| 24Mar2011 | 5022  | 509.3   | -20.473  | 2 R.SSVIMLIV chr2@5767  | 1.54E-10 | 0.007304 |
| 24Mar2011 | 5164  | 509.3   | -20.473  | 2 R.SSVIMLIV chr2@5767  | 3.76E-11 | 0.00104  |
| 24Mar2011 | 870   | 452.23  | -1.48793 | 2 R.SGEPLSA: Splice@chr | 1.40E-10 | 0.007304 |
| 24Mar2011 | 10474 | 1162.12 | 8.441505 | 2 K.YLGAYLL: Splice@chr | 3.57E-18 | 0        |
| 24Mar2011 | 2146  | 741.39  | -17.2291 | 2 K.QKSNWH chr5@1229    | 2.41E-11 | 0.00104  |
| 24Mar2011 | 3094  | 434.24  | 13.9946  | 3 _RSNDQTI chr5@6378    | 3.71E-11 | 0.00104  |
| 24Mar2011 | 2180  | 741.38  | -23.1647 | 2 K.FPENRHL: chr2@1477  | 1.66E-10 | 0.007524 |
| 24Mar2011 | 507   | 452.23  | -1.48793 | 2 R.SGEPLSA: Splice@chr | 1.15E-10 | 0.006437 |
| 24Mar2011 | 11349 | 1147.24 | 4.705638 | 3 R.FQSAAIG Splice@chr  | 1.14E-16 | 0        |
| 24Mar2011 | 5488  | 663.85  | -5.06443 | 2 N.KMIFSMI chr4@8622   | 1.29E-10 | 0.006437 |
| 24Mar2011 | 3178  | 434.24  | 13.9946  | 3 _RSNDQTI chr5@6378    | 1.78E-10 | 0.007524 |
| 24Mar2011 | 5208  | 509.3   | -20.473  | 2 R.SSVIMLIV chr2@5767  | 7.35E-11 | 0.00467  |
| 24Mar2011 | 8489  | 1182.56 | -21.0399 | 1 R.RFAENQI chr5@1779   | 4.94E-11 | 0.001358 |
| 24Mar2011 | 3133  | 434.24  | 13.9946  | 3 _RSNDQTI chr5@6378    | 6.32E-11 | 0.003365 |
| 24Mar2011 | 4460  | 422.74  | -20.1887 | 2 R.LLGTVAD chrX@4451   | 1.50E-10 | 0.007304 |
| 24Mar2011 | 5068  | 1017.59 | -22.5744 | 1 R.SSVIMLIV chr2@5767  | 1.88E-11 | 0.00104  |
| 24Mar2011 | 8527  | 1182.57 | -12.6646 | 1 R.RFAENQI chr5@1779   | 1.01E-10 | 0.005873 |
| 24Mar2011 | 3699  | 529.6   | -12.9775 | 3 _AFHESKLI chrX@3409   | 7.05E-12 | 3.77E-04 |
| 24Mar2011 | 4424  | 476.73  | -8.21113 | 2 R.SSHEISHF chr5@1494  | 8.05E-11 | 0.00496  |
| 24Mar2011 | 5116  | 509.3   | -20.473  | 2 R.SSVIMLIV chr2@5767  | 8.23E-11 | 0.00496  |
| 24Mar2011 | 3714  | 630.86  | 16.57085 | 2 K.SQISQAT: Splice@chr | 2.32E-10 | 0.002732 |
| 24Mar2011 | 6474  | 617.98  | -7.84814 | 3 K.LTNLSTA: Splice@chr | 3.05E-10 | 0.003897 |
| 24Mar2011 | 1719  | 741.39  | -17.2291 | 2 K.QKSNWH chr5@1229    | 1.07E-10 | 0.001278 |
| 24Mar2011 | 1817  | 741.39  | -17.2291 | 2 K.QKSNWH chr5@1229    | 4.44E-11 | 2.67E-04 |
| 24Mar2011 | 4609  | 663.85  | -5.06443 | 2 N.KMIFSMI chr4@8622   | 2.48E-10 | 0.002962 |
| 24Mar2011 | 9164  | 634.84  | 6.410455 | 2 R.VDIGDILF Splice@chr | 2.41E-12 | 0        |
| 24Mar2011 | 4299  | 509.8   | -23.773  | 2 R.SSVIMLIV chr2@5767  | 1.60E-10 | 0.002013 |
| 24Mar2011 | 1787  | 741.39  | -17.2291 | 2 K.QKSNWH chr5@1229    | 5.07E-11 | 2.67E-04 |
| 24Mar2011 | 2797  | 533.82  | 16.26677 | 2 K.TNIYTILTI chr5@1329 | 3.92E-10 | 0.005542 |
| 24Mar2011 | 4252  | 616.33  | -16.7632 | 2 K.LSKSVIFQ chr3@2798  | 3.39E-10 | 0.003897 |
| 24Mar2011 | 6571  | 855.41  | -22.1447 | 2 _HVQEVAI Splice@chr   | 1.79E-11 | 0        |
| 24Mar2011 | 4718  | 586.34  | 11.36604 | 2 R.LVILFFLF: chr2@6458 | 5.31E-10 | 0.006916 |
| 24Mar2011 | 902   | 544.82  | 19.97836 | 2 K.SNFQPVA chr1@1327   | 2.11E-10 | 0.002494 |
| 24Mar2011 | 9141  | 634.84  | 6.410455 | 2 R.VDIGDILF Splice@chr | 3.90E-13 | 0        |
| 24Mar2011 | 342   | 873.51  | -11.1925 | 1 R.QLGFPIAI chr3@2252  | 3.91E-10 | 0.005542 |
| 24Mar2011 | 7006  | 622.33  | 9.587405 | 2 R.AK+14.01 chr2@4270  | 1.11E-10 | 0.001278 |
| 24Mar2011 | 4833  | 1075.06 | -6.79295 | 2 R.TCSK+14. chr2@1253  | 4.77E-10 | 0.006449 |
| 24Mar2011 | 7048  | 1153.23 | -17.5731 | 3 F.EGIRTGG: Splice@chr | 8.30E-12 | 0        |
| 24Mar2011 | 2871  | 870.51  | 4.219085 | 1 K.IQKMPPF chrX@1229   | 4.61E-10 | 0.006231 |
| 24Mar2011 | 9751  | 1147.25 | 13.44098 | 3 R.FQSAAIG Splice@chr  | 6.89E-16 | 0        |
| 24Mar2011 | 8157  | 953.26  | 20.59712 | 4 _SDNDLFE Splice@chr   | 4.19E-10 | 0.005769 |
| 24Mar2011 | 1754  | 741.39  | -17.2291 | 2 K.QKSNWH chr5@1229    | 4.22E-11 | 2.67E-04 |
| 24Mar2011 | 4659  | 663.85  | -5.06443 | 2 N.KMIFSMI chr4@8622   | 2.49E-10 | 0.002962 |

|           |       |         |          |                          |          |          |
|-----------|-------|---------|----------|--------------------------|----------|----------|
| 24Mar2011 | 9759  | 1147.25 | 13.44098 | 3 R.FQSAAIG Splice@chr   | 4.02E-15 | 0        |
| 24Mar2011 | 2842  | 534.32  | 13.11853 | 2 K.TNIYTILTI chr5@1329  | 3.69E-10 | 0.005092 |
| 24Mar2011 | 2820  | 885.58  | 22.31512 | 1 K.SSIVPLIR. Splice@chr | 5.73E-10 | 0.007134 |
| 24Mar2011 | 10004 | 609.31  | -21.0703 | 2 K.LSAENSEI chr2@1065   | 1.17E-10 | 0.00369  |
| 24Mar2011 | 12920 | 622.33  | 9.587405 | 2 R.AK+14.01 chr2@4270   | 1.70E-10 | 0.005066 |
| 24Mar2011 | 13582 | 785.42  | 22.95449 | 1 _.MPAWAF chr2@1115     | 4.59E-11 | 0.001452 |
| 24Mar2011 | 8021  | 509.3   | -20.473  | 2 R.SSVIMLIV chr2@5767   | 9.76E-11 | 0.003246 |
| 24Mar2011 | 11022 | 1075.05 | -16.1169 | 2 R.TCSK+14. chr2@1255   | 3.56E-10 | 0.008095 |
| 24Mar2011 | 11983 | 607     | -9.70672 | 3 I.NRFNISK chrX@1250    | 8.71E-11 | 0.002693 |
| 24Mar2011 | 2241  | 744.38  | -27.5047 | 1 K.DGNAVLf chr5@8904    | 3.41E-10 | 0.007686 |
| 24Mar2011 | 14257 | 722.45  | -4.95112 | 2 R.RK+14.01 Splice@chr  | 5.23E-10 | 0.009948 |
| 24Mar2011 | 14931 | 732.07  | 19.51873 | 3 R.ATDDWII Splice@chr   | 8.11E-11 | 0.002576 |
| 24Mar2011 | 14728 | 641.36  | 4.696963 | 4 A.EITEMLPi Splice@chr  | 2.41E-13 | 0        |
| 24Mar2011 | 13352 | 1004.96 | -24.6213 | 2 K.KVELALV Splice@chr   | 2.39E-21 | 0        |
| 24Mar2011 | 11247 | 1156.88 | -0.96774 | 3 _.HTGPGVI Splice@chr   | 2.14E-11 | 8.73E-04 |
| 24Mar2011 | 17687 | 953.02  | 5.934625 | 2 K.EKKCNLIS chr1@1262   | 1.97E-10 | 0.005791 |
| 24Mar2011 | 10876 | 889.69  | 24.20073 | 4 K.NNPYMS. Splice@chr   | 2.53E-10 | 0.006812 |
| 24Mar2011 | 2504  | 403.22  | 17.24795 | 2 K.KGGGGCI chr1@1417    | 1.58E-11 | 5.17E-04 |
| 24Mar2011 | 14976 | 732.07  | 19.51873 | 3 R.ATDDWII Splice@chr   | 4.28E-11 | 0.001452 |
| 24Mar2011 | 18246 | 860.68  | 2.433027 | 4 R.FQSAAIG Splice@chr   | 2.98E-12 | 1.34E-04 |
| 24Mar2011 | 4273  | 566.81  | 0.647242 | 2 I.RIPLDYAE chr5@2047   | 3.78E-11 | 0.001105 |
| 24Mar2011 | 12064 | 833.93  | -9.2006  | 2 _.IIEPYVAV Splice@chr  | 7.44E-11 | 0.002367 |
| 24Mar2011 | 1521  | 510.3   | 12.8833  | 2 R.RHVAVVF chr1@1479    | 1.50E-10 | 0.004534 |
| 24Mar2011 | 12122 | 833.93  | -9.2006  | 2 _.IIEPYVAV Splice@chr  | 1.73E-10 | 0.005389 |
| 24Mar2011 | 3310  | 741.38  | -23.1647 | 2 K.FPENRHI. chr2@1477   | 3.05E-10 | 0.0074   |
| 24Mar2011 | 13524 | 785.42  | 22.95449 | 1 _.MPAWAF chr2@1115     | 6.69E-11 | 0.002257 |
| 24Mar2011 | 16247 | 1007.86 | 15.19559 | 3 R.CWNRRA Splice@chr    | 7.67E-12 | 1.34E-04 |
| 24Mar2011 | 8824  | 825.46  | -13.1033 | 2 R.SARENKT Splice@chr   | 1.17E-10 | 0.00369  |
| 24Mar2011 | 3642  | 407.74  | 5.852463 | 2 R.ASDIAPIK chrX@1799   | 1.35E-10 | 0.004338 |
| 24Mar2011 | 14050 | 636.36  | -24.7842 | 2 P.LSSVGAD chrX@9700    | 5.82E-11 | 0.001917 |
| 24Mar2011 | 14054 | 747.39  | 13.7081  | 2 K.MLRFNEC chr2@8355    | 4.61E-10 | 0.009278 |
| 24Mar2011 | 12855 | 1153.22 | -26.2628 | 3 F.EGIRTTGG Splice@chr  | 5.40E-13 | 0        |
| 24Mar2011 | 292   | 713.88  | -22.346  | 2 K.MKEKK+1 chr4@7820    | 6.69E-11 | 0.002257 |
| 24Mar2011 | 14508 | 991.51  | 24.02083 | 3 _.IYVPADD Splice@chr   | 8.55E-13 | 0        |
| 24Mar2011 | 15010 | 1143.87 | 4.220916 | 3 K.NMITGTS Splice@chr   | 4.02E-11 | 0.001105 |
| 24Mar2011 | 1907  | 488.28  | 18.24649 | 2 K.INAEFVG chr4@4519    | 1.49E-10 | 0.004534 |
| 24Mar2011 | 8766  | 825.96  | -15.1379 | 2 R.SARENKT Splice@chr   | 2.38E-10 | 0.00639  |
| 24Mar2011 | 3547  | 460.75  | -3.71898 | 2 K.IAECSVLK chrX@2064   | 1.20E-10 | 0.003912 |
| 24Mar2011 | 2184  | 412.56  | -22.1132 | 3 _.NPRGKKC Splice@chr   | 2.96E-10 | 0.0074   |
| 24Mar2011 | 5185  | 908.47  | 22.76165 | 1 R.DGRMTV chr2@5006     | 3.88E-10 | 0.008586 |
| 24Mar2011 | 12809 | 622.33  | 9.587405 | 2 R.AK+14.01 chr2@4270   | 1.50E-10 | 0.004534 |
| 24Mar2011 | 19443 | 550.3   | 17.11216 | 3 R.CFELFLK+ chrX@2489   | 1.60E-11 | 5.17E-04 |
| 24Mar2011 | 3152  | 439.75  | -7.44254 | 2 K.LYGEVGL chrX@2908    | 7.67E-11 | 0.002478 |
| 24Mar2011 | 2558  | 403.21  | -7.67034 | 2 K.KGGGGCI chr1@1417    | 1.44E-11 | 5.17E-04 |
| 24Mar2011 | 12862 | 622.33  | 9.587405 | 2 R.AK+14.01 chr2@4270   | 5.09E-10 | 0.009948 |
| 24Mar2011 | 16178 | 1003.18 | 7.145987 | 3 R.CWNRRA Splice@chr    | 1.06E-11 | 3.92E-04 |
| 24Mar2011 | 18241 | 1147.24 | 4.705638 | 3 R.FQSAAIG Splice@chr   | 7.33E-16 | 0        |

|           |       |         |          |                          |          |          |
|-----------|-------|---------|----------|--------------------------|----------|----------|
| 24Mar2011 | 1478  | 510.3   | 12.8833  | 2 R.RHVAYVF chr1@1479    | 1.21E-10 | 0.003912 |
| 24Mar2011 | 2239  | 412.56  | -22.1132 | 3 _..NPRGKKC Splice@chr  | 1.09E-10 | 0.00358  |
| 24Mar2011 | 3423  | 741.38  | -23.1647 | 2 K.FPENRHI, chr2@1477   | 3.20E-10 | 0.007495 |
| 24Mar2011 | 9040  | 1075.05 | -16.1169 | 2 R.TCSK+14. chr2@1255   | 1.89E-10 | 0.005582 |
| 24Mar2011 | 16092 | 884.41  | -1.81927 | 3 R.YRVDLAF chr5@6435    | 1.23E-10 | 0.003912 |
| 24Mar2011 | 13297 | 1005.47 | -16.3827 | 2 K.KVELALW Splice@chr   | 1.60E-22 | 0        |
| 24Mar2011 | 14352 | 722.45  | -4.95112 | 2 R.RK+14.01 Splice@chr  | 2.00E-10 | 0.005791 |
| 24Mar2011 | 11080 | 1075.05 | -16.1169 | 2 R.TCSK+14. chr2@1255   | 4.40E-10 | 0.009084 |
| 24Mar2011 | 3484  | 741.38  | -23.1647 | 2 K.FPENRHI, chr2@1477   | 3.63E-10 | 0.008095 |
| 24Mar2011 | 12253 | 858.47  | -5.67211 | 3 _..LETGIKPI Splice@chr | 1.25E-12 | 0        |
| 24Mar2011 | 8042  | 616.33  | -16.7632 | 2 K.LSKSVIFQ chr3@2798   | 5.26E-10 | 0.009948 |
| 24Mar2011 | 5156  | 825.97  | -3.07095 | 2 R.SARENKT Splice@chr   | 4.87E-11 | 0.001252 |
| 24Mar2011 | 6938  | 962.49  | 24.16856 | 2 R.AYFHVTA chr1@1005    | 2.80E-10 | 0.005904 |
| 24Mar2011 | 5080  | 663.85  | -5.06443 | 2 N.KMIFSMI chr4@8622    | 2.20E-10 | 0.004376 |
| 24Mar2011 | 8094  | 747.39  | 13.7081  | 2 K.MLRFNEC chr2@8355    | 4.07E-10 | 0.007345 |
| 24Mar2011 | 2238  | 741.39  | -17.2291 | 2 K.QKSNWH chr5@1229     | 9.93E-12 | 2.68E-04 |
| 24Mar2011 | 3666  | 455.25  | 8.8683   | 3 K.LEAKGGC chr5@1298    | 5.70E-10 | 0.009819 |
| 24Mar2011 | 8792  | 762.81  | 21.17414 | 5 _..SDNDLFE Splice@chr  | 5.04E-10 | 0.009011 |
| 24Mar2011 | 9575  | 634.84  | 6.410455 | 2 R.VDIGDILF Splice@chr  | 6.82E-12 | 0        |
| 24Mar2011 | 9554  | 634.84  | 6.410455 | 2 R.VDIGDILF Splice@chr  | 1.68E-12 | 0        |
| 24Mar2011 | 1489  | 562.83  | -11.5155 | 2 K.RQERGIL chr1@1844    | 1.41E-10 | 0.002824 |
| 24Mar2011 | 6942  | 607     | -9.70672 | 3 I.NRFNISK chrX@1250    | 2.09E-10 | 0.004151 |
| 24Mar2011 | 7402  | 622.33  | 9.587405 | 2 R.AK+14.01 chr2@4270   | 2.36E-10 | 0.004792 |
| 24Mar2011 | 4750  | 688.03  | -17.0347 | 3 L.IFK+14.01 chr3@8836  | 3.00E-10 | 0.006128 |
| 24Mar2011 | 5405  | 626.31  | 6.247018 | 2 K.SEELMYN chr4@2675    | 1.41E-12 | 0        |
| 24Mar2011 | 6980  | 833.93  | -9.2006  | 2 _..IIEPYVAV Splice@chr | 5.22E-10 | 0.009436 |
| 24Mar2011 | 3620  | 455.25  | 8.8683   | 3 K.LEAKGGC chr5@1298    | 3.73E-10 | 0.007154 |
| 24Mar2011 | 2112  | 741.39  | -17.2291 | 2 K.QKSNWH chr5@1229     | 1.81E-11 | 2.68E-04 |
| 24Mar2011 | 8571  | 928.01  | 17.71166 | 2 R.K+14.016 chr5@2010   | 5.35E-10 | 0.009628 |
| 24Mar2011 | 2149  | 741.39  | -17.2291 | 2 K.QKSNWH chr5@1229     | 2.49E-11 | 5.15E-04 |
| 24Mar2011 | 2193  | 741.39  | -9.64508 | 2 K.FPENRHI, chr2@1477   | 1.94E-10 | 0.004151 |
| 24Mar2011 | 10202 | 1147.25 | 13.44098 | 3 R.FQSAAIG Splice@chr   | 1.06E-10 | 0.002374 |
| 24Mar2011 | 6113  | 495.29  | -6.17408 | 2 R.VFIEVNLF chr4@5737   | 1.80E-10 | 0.00395  |
| 24Mar2011 | 5978  | 671.37  | -24.0361 | 2 T.FNIVHTQ Splice@chr   | 3.56E-10 | 0.006938 |
| 24Mar2011 | 7445  | 622.33  | 9.587405 | 2 R.AK+14.01 chr2@4270   | 4.48E-10 | 0.008182 |
| 24Mar2011 | 10196 | 860.68  | 2.433027 | 4 R.FQSAAIG Splice@chr   | 1.01E-10 | 0.002374 |
| 24Mar2011 | 852   | 562.31  | -13.4391 | 2 R.FYLLYLYK Splice@chr  | 9.50E-11 | 0.002374 |
| 24Mar2011 | 5275  | 663.85  | -5.06443 | 2 N.KMIFSMI chr4@8622    | 2.19E-10 | 0.002987 |
| 24Mar2011 | 6195  | 671.37  | -24.0361 | 2 T.FNIVHTQ Splice@chr   | 3.29E-10 | 0.004474 |
| 24Mar2011 | 10300 | 634.84  | 6.410455 | 2 R.VDIGDILF Splice@chr  | 2.47E-12 | 0        |
| 24Mar2011 | 7289  | 606.67  | -2.35139 | 3 I.NRFNISK chrX@1250    | 4.42E-10 | 0.00687  |
| 24Mar2011 | 46    | 420.22  | -19.7277 | 2 K.KNAQNH chr2@1322     | 4.48E-10 | 0.00687  |
| 24Mar2011 | 6841  | 701.36  | 28.23715 | 3 K.NNPYMS Splice@chr    | 5.25E-12 | 0        |
| 24Mar2011 | 11029 | 1147.25 | 13.44098 | 3 R.FQSAAIG Splice@chr   | 1.33E-10 | 0.001833 |
| 24Mar2011 | 10792 | 962.47  | -16.0654 | 3 R.WFWGQI chr4@3030     | 2.26E-10 | 0.003173 |
| 24Mar2011 | 8337  | 746.91  | -22.4202 | 2 I.SSNRLMN Splice@chr   | 3.64E-10 | 0.005396 |
| 24Mar2011 | 7378  | 631.37  | -7.84281 | 2 R.SKILTFFLI chr1@1496  | 3.70E-10 | 0.005396 |

|           |       |         |          |                         |          |          |
|-----------|-------|---------|----------|-------------------------|----------|----------|
| 24Mar2011 | 10824 | 959.04  | 19.81385 | 2 Y.NNCKLNS chrX@1250   | 3.31E-11 | 6.53E-04 |
| 24Mar2011 | 1313  | 510.3   | 12.8833  | 2 R.RHVAYVF chr1@1479   | 2.81E-11 | 4.47E-04 |
| 24Mar2011 | 10959 | 962.8   | 19.96909 | 3 _GCSIVPIS Splice@chr  | 3.32E-10 | 0.004474 |
| 24Mar2011 | 7821  | 622.33  | 9.587405 | 2 R.AK+14.01 chr2@4270  | 1.62E-10 | 0.002225 |
| 24Mar2011 | 8920  | 991.51  | 24.02083 | 3 _IYVPADD Splice@chr   | 1.64E-14 | 0        |
| 24Mar2011 | 2170  | 741.39  | -17.2291 | 2 K.QKSNWH chr5@1229    | 2.33E-11 | 4.47E-04 |
| 24Mar2011 | 8238  | 983.97  | 4.629411 | 2 R.SFSTIPDS Splice@chr | 2.01E-13 | 0        |
| 24Mar2011 | 8580  | 747.39  | 13.7081  | 2 K.MLRFNEC chr2@8355   | 5.89E-10 | 0.009778 |
| 24Mar2011 | 7911  | 622.33  | 9.587405 | 2 R.AK+14.01 chr2@4270  | 3.61E-10 | 0.005396 |
| 24Mar2011 | 3622  | 455.25  | 8.8683   | 3 K.LEAKGGC chr5@1298   | 4.28E-10 | 0.006312 |
| 24Mar2011 | 1574  | 510.3   | 12.8833  | 2 R.RHVAYVF chr1@1479   | 7.00E-11 | 0.001274 |
| 24Mar2011 | 10970 | 970.45  | -29.5364 | 3 _VACNKM Splice@chr    | 5.42E-10 | 0.008886 |
| 24Mar2011 | 3164  | 652.36  | 24.80642 | 2 V.SRDQTLG chr4@1458   | 4.24E-10 | 0.006312 |
| 24Mar2011 | 6591  | 864.45  | -14.392  | 2 K.LKCSFPM chr5@1599   | 3.10E-10 | 0.004288 |
| 24Mar2011 | 7466  | 858.48  | 6.006088 | 3 _LETGIKPI Splice@chr  | 3.88E-13 | 0        |
| 24Mar2011 | 11043 | 1064.23 | -7.63665 | 3 R.QWQQDI chr5@5475    | 7.45E-11 | 0.001274 |
| 24Mar2011 | 2127  | 741.39  | -17.2291 | 2 K.QKSNWH chr5@1229    | 7.78E-11 | 0.00145  |
| 24Mar2011 | 6139  | 671.37  | -24.0361 | 2 T.FNIVHTQ Splice@chr  | 7.42E-11 | 0.001274 |
| 24Mar2011 | 6557  | 1042.55 | 20.23923 | 1 R.YLELDNFI Splice@chr | 5.80E-11 | 8.59E-04 |
| 24Mar2011 | 5528  | 1075.06 | -6.79295 | 2 R.TCSK+14. chr2@1255  | 4.17E-10 | 0.006312 |
| 24Mar2011 | 8157  | 850.42  | 25.00643 | 3 K.RASGWA chrX@1018    | 5.07E-10 | 0.007774 |
| 24Mar2011 | 2087  | 741.39  | -17.2291 | 2 K.QKSNWH chr5@1229    | 6.61E-11 | 0.001069 |
| 24Mar2011 | 5390  | 825.97  | -3.07095 | 2 R.SARENKT Splice@chr  | 1.59E-10 | 0.002225 |
| 24Mar2011 | 9769  | 761.88  | -3.44933 | 4 K.SGDAGIV Splice@chr  | 2.85E-10 | 0.004288 |
| 24Mar2011 | 8191  | 1005.47 | -16.3827 | 2 K.KVELALW Splice@chr  | 1.46E-19 | 0        |
| 24Mar2011 | 10265 | 634.84  | 6.410455 | 2 R.VDIGDILF Splice@chr | 1.71E-12 | 0        |
| 24Mar2011 | 7332  | 833.94  | 2.824179 | 2 _IIEPYVAV Splice@chr  | 3.44E-10 | 0.005238 |
| 24Mar2011 | 7053  | 705.83  | -3.72364 | 2 M.PSMEEV chr5@4890    | 2.25E-15 | 0        |
| 24Mar2011 | 1091  | 452.23  | -1.48793 | 2 R.SGEPLSA: Splice@chr | 2.13E-10 | 0.007017 |
| 24Mar2011 | 1547  | 510.3   | 12.8833  | 2 R.RHVAYVF chr1@1479   | 6.54E-12 | 0        |
| 24Mar2011 | 2564  | 936.48  | 27.86052 | 1 K.LNGGYEC chr2@1191   | 6.74E-11 | 0.003305 |
| 24Mar2011 | 11608 | 634.84  | 6.410455 | 2 R.VDIGDILF Splice@chr | 3.29E-12 | 0        |
| 24Mar2011 | 1051  | 452.23  | -1.48793 | 2 R.SGEPLSA: Splice@chr | 5.31E-11 | 0.003305 |
| 24Mar2011 | 7953  | 945.95  | -25.2346 | 2 K.FSKKNMI chr4@1701   | 1.06E-10 | 0.00433  |
| 24Mar2011 | 5773  | 509.3   | -20.473  | 2 R.SSVIMLIV chr2@5767  | 5.38E-11 | 0.003305 |
| 24Mar2011 | 166   | 452.23  | -1.48793 | 2 R.SGEPLSA: Splice@chr | 3.25E-11 | 0.00232  |
| 24Mar2011 | 9291  | 803.42  | 3.194723 | 2 H.ASSLMII\ Splice@chr | 8.79E-11 | 0.003811 |
| 24Mar2011 | 1626  | 510.3   | 12.8833  | 2 R.RHVAYVF chr1@1479   | 1.31E-11 | 6.00E-04 |
| 24Mar2011 | 5626  | 509.8   | -23.773  | 2 R.SSVIMLIV chr2@5767  | 4.60E-11 | 0.003305 |
| 24Mar2011 | 6328  | 1075.06 | -6.79295 | 2 R.TCSK+14. chr2@1255  | 1.06E-10 | 0.00433  |
| 24Mar2011 | 11019 | 1003.18 | 7.145987 | 3 R.CWNRRA Splice@chr   | 7.96E-13 | 0        |
| 24Mar2011 | 5676  | 509.8   | -23.773  | 2 R.SSVIMLIV chr2@5767  | 5.14E-11 | 0.003305 |
| 24Mar2011 | 5719  | 509.3   | -20.473  | 2 R.SSVIMLIV chr2@5767  | 5.12E-11 | 0.003305 |
| 24Mar2011 | 2339  | 741.38  | -23.1647 | 2 K.FPENRHI\ chr2@1477  | 3.24E-10 | 0.009962 |
| 24Mar2011 | 367   | 801.46  | -26.9469 | 1 K.WAGVVL chr4@3669    | 7.32E-11 | 0.003305 |
| 24Mar2011 | 2001  | 548.28  | -5.99626 | 4 R.KVDK+14 chr3@5261   | 2.38E-10 | 0.007774 |
| 24Mar2011 | 3508  | 434.24  | 13.9946  | 3 _RSNDQTI chr5@6378    | 6.49E-11 | 0.003305 |

|           |       |         |          |                         |          |          |
|-----------|-------|---------|----------|-------------------------|----------|----------|
| 24Mar2011 | 5271  | 571.86  | -2.35222 | 2 T.KKGDIVEI chr5@1238  | 2.59E-10 | 0.008749 |
| 24Mar2011 | 9346  | 1005.47 | -16.3827 | 2 K.KVELALW Splice@chr  | 1.88E-22 | 0        |
| 24Mar2011 | 7635  | 881.47  | 19.52679 | 2 A.HRK+14.( chr5@1438  | 2.45E-10 | 0.008023 |
| 24Mar2011 | 3978  | 692.38  | -0.08828 | 2 K.NK+14.0 chr4@1019   | 3.04E-10 | 0.00948  |
| 24Mar2011 | 9531  | 785.42  | 22.95449 | 1 _MPAWAF chr2@1119     | 3.28E-11 | 0.00232  |
| 24Mar2011 | 176   | 452.23  | -1.48793 | 2 R.SGEPLSA Splice@chr  | 7.87E-11 | 0.003305 |
| 24Mar2011 | 154   | 452.23  | -1.48793 | 2 R.SGEPLSA Splice@chr  | 4.30E-11 | 0.003158 |
| 24Mar2011 | 4841  | 476.73  | -8.21113 | 2 R.SSHEISHF chr5@1494  | 1.61E-10 | 0.006584 |
| 24Mar2011 | 5586  | 509.8   | -23.773  | 2 R.SSVIMLIV chr2@5767  | 5.12E-11 | 0.003305 |
| 24Mar2011 | 10158 | 991.51  | 24.02083 | 3 _IYVPADD Splice@chr   | 3.49E-13 | 0        |
| 24Mar2011 | 11583 | 634.84  | 6.410455 | 2 R.VDIGDILF Splice@chr | 6.82E-13 | 0        |
| 24Mar2011 | 2419  | 741.39  | -17.2291 | 2 K.QKSNWH chr5@1229    | 3.01E-11 | 0.00232  |
| 24Mar2011 | 1504  | 510.3   | 12.8833  | 2 R.RHVAYVF chr1@1479   | 6.40E-11 | 0.003305 |
| 24Mar2011 | 2301  | 741.39  | -17.2291 | 2 K.QKSNWH chr5@1229    | 1.13E-10 | 0.004582 |
| 24Mar2011 | 1465  | 510.3   | 12.8833  | 2 R.RHVAYVF chr1@1479   | 7.05E-11 | 0.003305 |
| 24Mar2011 | 4733  | 476.73  | -8.21113 | 2 R.SSHEISHF chr5@1494  | 1.90E-10 | 0.006789 |
| 24Mar2011 | 12416 | 1147.25 | 13.44098 | 3 R.FQSAAIG Splice@chr  | 1.43E-15 | 0        |
| 24Mar2011 | 6918  | 583.82  | -28.5596 | 2 R.LVFPITFS chr1@2422  | 2.58E-10 | 0.008749 |
| 24Mar2011 | 9604  | 742.88  | -6.21424 | 2 K.M+15.99 chr4@1648   | 3.69E-10 | 0.008367 |
| 24Mar2011 | 5934  | 1075.06 | -6.79295 | 2 R.TCSK+14. chr2@1253  | 2.83E-10 | 0.004749 |
| 24Mar2011 | 5796  | 825.47  | -1.03642 | 2 R.SARENKT Splice@chr  | 2.97E-10 | 0.00533  |
| 24Mar2011 | 2307  | 741.39  | -17.2291 | 2 K.QKSNWH chr5@1229    | 1.00E-10 | 0.001459 |
| 24Mar2011 | 12009 | 1028.61 | 15.56192 | 2 _WWSLWI chr5@9909     | 2.00E-10 | 0.002015 |
| 24Mar2011 | 6933  | 748.73  | -12.625  | 3 R.LPSKENL chr4@5639   | 2.61E-10 | 0.00397  |
| 24Mar2011 | 2525  | 936.48  | 27.86052 | 1 K.LNGGYEC chr2@1191   | 1.75E-11 | 2.17E-04 |
| 24Mar2011 | 2268  | 741.38  | -23.1647 | 2 K.FPENRHI chr2@1477   | 1.81E-10 | 0.001827 |
| 24Mar2011 | 6770  | 671.37  | -24.0361 | 2 T.FNIVHTQ Splice@chr  | 4.38E-10 | 0.009241 |
| 24Mar2011 | 1259  | 544.82  | 19.97836 | 2 K.SNFQPVA chr1@1327   | 4.76E-11 | 2.17E-04 |
| 24Mar2011 | 8719  | 1004.97 | -14.712  | 2 K.KVELALW Splice@chr  | 2.68E-22 | 0        |
| 24Mar2011 | 5843  | 825.46  | -13.1033 | 2 R.SARENKT Splice@chr  | 4.57E-10 | 0.009597 |
| 24Mar2011 | 7873  | 607     | -9.70672 | 3 I.NRFNISK chrX@1250   | 9.52E-11 | 0.001259 |
| 24Mar2011 | 1853  | 548.03  | -4.46306 | 4 R.KVDK+14 chr3@5261   | 3.69E-10 | 0.008367 |
| 24Mar2011 | 6081  | 626.31  | 6.247018 | 2 K.SEELMYN Splice@chr  | 1.47E-13 | 0        |
| 24Mar2011 | 289   | 629.4   | 2.233974 | 1 K.LAVAGAK Splice@chr  | 4.11E-10 | 0.009241 |
| 24Mar2011 | 9013  | 902.54  | -28.5309 | 1 R.PFGVVVK chr2@1360   | 9.69E-11 | 0.001459 |
| 24Mar2011 | 6631  | 706.34  | 8.098268 | 2 M.PSMEEV chr5@4890    | 6.12E-15 | 0        |
| 24Mar2011 | 807   | 915.47  | 1.201399 | 1 K.FHEIGGQ chrX@4727   | 1.37E-10 | 0.001644 |
| 24Mar2011 | 8867  | 785.42  | 22.95449 | 1 _MPAWAF chr2@1119     | 2.95E-11 | 2.17E-04 |
| 24Mar2011 | 8431  | 622.33  | 9.587405 | 2 R.AK+14.01 chr2@4270  | 4.52E-10 | 0.009416 |
| 24Mar2011 | 8387  | 622.33  | 9.587405 | 2 R.AK+14.01 chr2@4270  | 4.62E-10 | 0.009765 |
| 24Mar2011 | 7166  | 833.41  | -5.13266 | 2 _IDM+15.5 chrX@3237   | 3.48E-10 | 0.007619 |
| 24Mar2011 | 3914  | 1025.61 | -11.6755 | 1 K.LGLGSGL chr5@4945   | 4.22E-11 | 2.17E-04 |
| 24Mar2011 | 2390  | 741.39  | -17.2291 | 2 K.QKSNWH chr5@1229    | 3.41E-11 | 2.17E-04 |
| 24Mar2011 | 5351  | 509.3   | -20.473  | 2 R.SSVIMLIV chr2@5767  | 1.66E-10 | 0.001827 |
| 24Mar2011 | 6892  | 748.73  | -12.625  | 3 R.LPSKENL chr4@5639   | 3.51E-10 | 0.007619 |
| 24Mar2011 | 5312  | 509.8   | -23.773  | 2 R.SSVIMLIV chr2@5767  | 3.76E-11 | 2.17E-04 |
| 24Mar2011 | 5318  | 1017.59 | -22.5744 | 1 R.SSVIMLIV chr2@5767  | 5.64E-11 | 0.00105  |

|           |       |         |          |                          |          |          |
|-----------|-------|---------|----------|--------------------------|----------|----------|
| 24Mar2011 | 10491 | 1007.86 | 15.19559 | 3 R.CWNRRA Splice@chr    | 1.69E-10 | 0.001827 |
| 24Mar2011 | 2350  | 741.39  | -17.2291 | 2 K.QKSNWH chr5@1229     | 2.62E-11 | 2.17E-04 |
| 24Mar2011 | 7942  | 833.94  | 2.824179 | 2 _..IIEPYVAV Splice@chr | 4.47E-10 | 0.009416 |
| 24Mar2011 | 8916  | 785.42  | 22.95449 | 1 _..MPAWAF chr2@1115    | 2.60E-11 | 2.17E-04 |
| 24Mar2011 | 5978  | 1075.06 | -6.79295 | 2 R.TCSK+14. chr2@1253   | 2.06E-10 | 0.002207 |
| 24Mar2011 | 8313  | 785.42  | 22.95449 | 1 _..MPAWAF chr2@1115    | 1.74E-11 | 2.36E-04 |
| 24Mar2011 | 6261  | 671.37  | -24.0361 | 2 T.FNIVHTQ Splice@chr   | 3.41E-10 | 0.007099 |
| 24Mar2011 | 3119  | 434.24  | 13.9946  | 3 _..RSNDQTI chr5@6378   | 2.09E-10 | 0.002086 |
| 24Mar2011 | 8818  | 722.45  | -4.95112 | 2 R.RK+14.01 Splice@chr  | 1.76E-10 | 0.002086 |
| 24Mar2011 | 8847  | 610.67  | 21.02419 | 3 _..WFMEKT chr5@1462    | 1.42E-10 | 0.001494 |
| 24Mar2011 | 4924  | 616.33  | -16.7632 | 2 K.LSKSVIFQ chr3@2798   | 4.06E-10 | 0.008031 |
| 24Mar2011 | 2848  | 583.79  | -23.2497 | 2 R.YLAAAAC chr5@9265    | 4.31E-10 | 0.008413 |
| 24Mar2011 | 8789  | 835.45  | -7.2977  | 4 R.K+14.016 chrX@9996   | 5.48E-10 | 0.009267 |
| 24Mar2011 | 7367  | 767.91  | -17.0808 | 2 K.SGSRTQV Splice@chr   | 4.76E-10 | 0.008927 |
| 24Mar2011 | 5406  | 825.46  | -13.1033 | 2 R.SARENKT Splice@chr   | 9.58E-11 | 8.70E-04 |
| 24Mar2011 | 7891  | 622.33  | 9.587405 | 2 R.AK+14.01 chr2@4270   | 1.57E-10 | 0.001699 |
| 24Mar2011 | 7895  | 1153.22 | -26.2628 | 3 F.EGIRTGG Splice@chr   | 2.04E-12 | 0        |
| 24Mar2011 | 1347  | 510.3   | 12.8833  | 2 R.RHVAYVF chr1@1479    | 6.74E-12 | 2.36E-04 |
| 24Mar2011 | 1381  | 510.3   | 12.8833  | 2 R.RHVAYVF chr1@1479    | 2.06E-10 | 0.002086 |
| 24Mar2011 | 8235  | 983.96  | -5.49698 | 2 R.SFSTIPDS chr2@1305   | 3.83E-15 | 0        |
| 24Mar2011 | 1421  | 510.3   | 12.8833  | 2 R.RHVAYVF chr1@1479    | 1.31E-11 | 2.36E-04 |
| 24Mar2011 | 7731  | 753.96  | 0.162122 | 2 K.K+14.016 chr2@1375   | 2.38E-11 | 2.36E-04 |
| 24Mar2011 | 8356  | 785.42  | 22.95449 | 1 _..MPAWAF chr2@1115    | 3.33E-11 | 4.53E-04 |
| 24Mar2011 | 3172  | 434.24  | 13.9946  | 3 _..RSNDQTI chr5@6378   | 1.90E-10 | 0.002086 |
| 24Mar2011 | 11092 | 1094.62 | -5.8897  | 2 K.KWWQKI chr5@2043     | 3.17E-10 | 0.006513 |
| 24Mar2011 | 7658  | 814.49  | 10.62466 | 2 L.LNESRDG chr3@5389    | 1.42E-10 | 0.001494 |
| 24Mar2011 | 7552  | 937.96  | 24.29864 | 2 R.ECSQSDS chr2@8876    | 4.81E-10 | 0.008927 |
| 24Mar2011 | 8175  | 1005.47 | -16.3827 | 2 K.KVELALW Splice@chr   | 6.43E-21 | 0        |
| 24Mar2011 | 7349  | 607     | -9.70672 | 3 I.NRFNISK chrX@1250    | 8.38E-11 | 8.70E-04 |
| 24Mar2011 | 9836  | 644.4   | -15.5206 | 2 K.KIISDFLP chr5@1401   | 5.49E-10 | 0.009267 |
| 24Mar2011 | 2115  | 741.38  | -23.1647 | 2 K.FPENRHI, chr2@1477   | 2.02E-10 | 0.002086 |
| 24Mar2011 | 2076  | 741.38  | -23.1647 | 2 K.FPENRHI, chr2@1477   | 9.27E-11 | 8.70E-04 |
| 24Mar2011 | 837   | 401.74  | -8.14847 | 2 R.AIGLVSSF chr2@1017   | 1.99E-10 | 0.002086 |
| 24Mar2011 | 11099 | 959.54  | 18.06294 | 2 Y.NNCKLNS chrX@1250    | 2.26E-10 | 0.002086 |
| 24Mar2011 | 3070  | 434.24  | 13.9946  | 3 _..RSNDQTI chr5@6378   | 4.06E-10 | 0.008031 |
| 24Mar2011 | 2035  | 741.38  | -23.1647 | 2 K.FPENRHI, chr2@1477   | 4.33E-10 | 0.008413 |
| 24Mar2011 | 5456  | 825.96  | -15.1379 | 2 R.SARENKT Splice@chr   | 9.20E-11 | 8.70E-04 |
| 24Mar2011 | 2997  | 693.87  | -6.6949  | 2 V.ICVAVGD chr5@1063    | 2.39E-10 | 0.002902 |
| 24Mar2011 | 3223  | 434.24  | 13.9946  | 3 _..RSNDQTI chr5@6378   | 2.08E-10 | 0.002086 |
| 24Mar2011 | 7844  | 622.33  | 9.587405 | 2 R.AK+14.01 chr2@4270   | 1.77E-10 | 0.002086 |
| 24Mar2011 | 1995  | 741.38  | -23.1647 | 2 K.FPENRHI, chr2@1477   | 2.78E-10 | 0.004739 |
| 24Mar2011 | 10003 | 1007.86 | 15.19559 | 3 R.CWNRRA Splice@chr    | 3.79E-11 | 4.53E-04 |
| 24Mar2011 | 153   | 748.36  | 16.41564 | 1 R.ATAGDGI chr3@5843    | 2.92E-10 | 0.005333 |
| 24Mar2011 | 7985  | 629     | 0.453558 | 3 L.VFHSFFIL chrX@1261   | 3.34E-10 | 0.006911 |
| 24Mar2011 | 11338 | 1147.24 | 4.705638 | 3 R.FQSAAIG Splice@chr   | 1.75E-15 | 0        |
| 24Mar2011 | 6809  | 833.93  | -9.2006  | 2 _..IIEPYVAV Splice@chr | 2.47E-10 | 0.004702 |
| 24Mar2011 | 2702  | 434.24  | 13.9946  | 3 _..RSNDQTI chr5@6378   | 1.68E-10 | 0.002783 |

|           |      |         |          |                         |          |          |
|-----------|------|---------|----------|-------------------------|----------|----------|
| 24Mar2011 | 6091 | 1187.91 | -26.8667 | 3 K.NQPIHVF Splice@chr  | 1.56E-11 | 2.81E-04 |
| 24Mar2011 | 9514 | 634.84  | 6.410455 | 2 R.VDIGDILF Splice@chr | 1.16E-12 | 0        |
| 24Mar2011 | 1830 | 741.39  | -17.2291 | 2 K.QKSNWH chr5@1229    | 2.95E-11 | 2.81E-04 |
| 24Mar2011 | 1909 | 741.39  | -17.2291 | 2 K.QKSNWH chr5@1229    | 5.96E-11 | 5.38E-04 |
| 24Mar2011 | 7416 | 1075.57 | -5.83143 | 3 K.EIVSTDLE Splice@chr | 3.90E-10 | 0.008464 |
| 24Mar2011 | 5142 | 626.31  | 6.247018 | 2 K.SEELMYN chr4@2675   | 1.02E-13 | 0        |
| 24Mar2011 | 8584 | 804.44  | 2.559552 | 3 R.DSAICNG Splice@chr  | 1.84E-10 | 0.003531 |
| 24Mar2011 | 3002 | 533.82  | 16.26677 | 2 K.TNIYTILTI chr5@1329 | 3.24E-10 | 0.006369 |
| 24Mar2011 | 7677 | 983.97  | 4.629411 | 2 R.SFSTIPDS chr2@1309  | 1.60E-15 | 0        |
| 24Mar2011 | 7315 | 622.33  | 9.587405 | 2 R.AK+14.01 chr2@4270  | 2.60E-10 | 0.004702 |
| 24Mar2011 | 1330 | 510.3   | 12.8833  | 2 R.RHVAYVF chr1@1479   | 6.54E-12 | 2.81E-04 |
| 24Mar2011 | 1865 | 741.39  | -17.2291 | 2 K.QKSNWH chr5@1229    | 8.34E-11 | 0.001571 |
| 24Mar2011 | 1791 | 741.38  | -23.1647 | 2 K.FPENRHLI chr2@1477  | 3.27E-10 | 0.006611 |
| 24Mar2011 | 7086 | 814.49  | 10.62466 | 2 L.LNESRDG chr3@5389   | 2.65E-10 | 0.004702 |
| 24Mar2011 | 7356 | 1153.23 | -17.5731 | 3 F.EGIRTTGG Splice@chr | 1.28E-12 | 0        |
| 24Mar2011 | 1242 | 510.3   | 12.8833  | 2 R.RHVAYVF chr1@1479   | 6.54E-12 | 2.81E-04 |
| 24Mar2011 | 2539 | 422.24  | -14.1272 | 2 R.KVHGFAE chr4@4031   | 1.12E-11 | 2.81E-04 |
| 24Mar2011 | 6972 | 762.43  | 16.40509 | 2 _MK+14.0 chr4@7749    | 2.95E-10 | 0.005164 |
| 24Mar2011 | 9534 | 634.84  | 6.410455 | 2 R.VDIGDILF Splice@chr | 3.97E-12 | 0        |
| 24Mar2011 | 2831 | 434.24  | 13.9946  | 3 _RSNDQTI chr5@6378    | 2.18E-10 | 0.00424  |
| 24Mar2011 | 6388 | 692.35  | -25.4254 | 2 K.KDKNAAF chr3@8929   | 1.83E-10 | 0.003732 |
| 24Mar2011 | 4235 | 1017.59 | -22.5744 | 1 R.SSVIMLIV chr2@5767  | 5.25E-10 | 0.009018 |
| 24Mar2011 | 4234 | 509.8   | -23.773  | 2 R.SSVIMLIV chr2@5767  | 3.76E-11 | 4.80E-04 |
| 24Mar2011 | 6709 | 858.48  | 6.006088 | 3 _LETGIKPI Splice@chr  | 1.01E-10 | 0.002052 |
| 24Mar2011 | 6571 | 607     | -9.70672 | 3 I.NRFNISLK chrX@1250  | 7.51E-11 | 0.00139  |
| 24Mar2011 | 9572 | 1147.24 | 4.705638 | 3 R.FQSAAIG Splice@chr  | 6.38E-14 | 0        |
| 24Mar2011 | 1784 | 936.48  | 27.86052 | 1 K.LNGGYEC chr2@1191   | 4.25E-11 | 7.10E-04 |
| 24Mar2011 | 8134 | 953.26  | 20.59712 | 4 _SDNDLFE Splice@chr   | 2.59E-10 | 0.004556 |
| 24Mar2011 | 6834 | 938.46  | 22.50833 | 2 R.ECSQSDS chr2@8876   | 3.71E-10 | 0.007008 |
| 24Mar2011 | 1600 | 741.38  | -23.1647 | 2 K.FPENRHLI chr2@1477  | 2.00E-10 | 0.003732 |
| 24Mar2011 | 8487 | 665.37  | -26.6417 | 2 Q.INNK+14 Splice@chr  | 4.50E-10 | 0.00803  |
| 24Mar2011 | 4565 | 897.42  | -27.6753 | 3 _QVREMH Splice@chr    | 3.13E-10 | 0.006203 |
| 24Mar2011 | 2708 | 533.82  | 16.26677 | 2 K.TNIYTILTI chr5@1329 | 2.72E-10 | 0.005622 |
| 24Mar2011 | 4605 | 897.42  | -27.6753 | 3 _QVREMH Splice@chr    | 5.07E-10 | 0.008827 |
| 24Mar2011 | 7183 | 1182.57 | -12.6646 | 1 R.RFAENQI chr5@1779   | 1.76E-10 | 0.003543 |
| 24Mar2011 | 6289 | 801.7   | -6.78619 | 3 K.FFKPNTD chr5@7527   | 5.91E-15 | 0        |
| 24Mar2011 | 612  | 510.3   | 12.8833  | 2 R.RHVAYVF chr1@1479   | 6.40E-11 | 0.001166 |
| 24Mar2011 | 4257 | 616.33  | -16.7632 | 2 K.LSKSVIFQ chr3@2798  | 5.41E-10 | 0.00922  |
| 24Mar2011 | 4275 | 509.8   | -23.773  | 2 R.SSVIMLIV chr2@5767  | 5.39E-11 | 9.37E-04 |
| 24Mar2011 | 7679 | 747.39  | 13.7081  | 2 K.MLRFNEC chr2@8359   | 1.49E-10 | 0.003337 |
| 24Mar2011 | 7450 | 785.42  | 22.95449 | 1 _MPAWAF chr2@1119     | 2.82E-11 | 4.80E-04 |
| 24Mar2011 | 3375 | 648.35  | -3.15935 | 2 K.TTVTLQN chr4@3816   | 1.47E-10 | 0.003141 |
| 24Mar2011 | 1560 | 741.38  | -23.1647 | 2 K.FPENRHLI chr2@1477  | 1.92E-10 | 0.003732 |
| 24Mar2011 | 6252 | 801.7   | -6.78619 | 3 K.FFKPNTD chr5@7527   | 4.39E-15 | 0        |
| 24Mar2011 | 4763 | 1075.05 | -16.1169 | 2 R.TCSK+14. chr2@1253  | 4.48E-10 | 0.00803  |
| 24Mar2011 | 6393 | 887.93  | 29.43791 | 2 I.DEREESTN Splice@chr | 1.94E-10 | 0.003732 |
| 24Mar2011 | 4708 | 825.96  | -15.1379 | 2 R.SARENKT Splice@chr  | 1.72E-10 | 0.003543 |

|           |      |         |          |                         |          |          |
|-----------|------|---------|----------|-------------------------|----------|----------|
| 24Mar2011 | 3708 | 476.73  | -8.21113 | 2 R.SSHEISHF chr5@1494  | 5.12E-10 | 0.009018 |
| 24Mar2011 | 6916 | 516.3   | 4.106203 | 3 R.NIIFLMVI chrX@1294  | 7.50E-11 | 0.00139  |
| 24Mar2011 | 7344 | 983.97  | 4.629411 | 2 R.SFSTIPDS chr2@1305  | 2.48E-15 | 0        |
| 24Mar2011 | 1749 | 936.48  | 27.86052 | 1 K.LNGGYEC chr2@1191   | 6.25E-11 | 9.37E-04 |
| 24Mar2011 | 9579 | 1147.24 | 4.705638 | 3 R.FQSAAIG Splice@chr  | 1.05E-15 | 0        |
| 24Mar2011 | 3023 | 1025.61 | -11.6755 | 1 K.LGLGSGL chr5@4945   | 6.15E-11 | 9.37E-04 |
| 24Mar2011 | 1634 | 741.39  | -9.64508 | 2 K.FPENRHI chr2@1477   | 1.49E-10 | 0.003337 |
| 24Mar2011 | 2499 | 434.24  | 13.9946  | 3 _RSNDQTI chr5@6378    | 1.95E-10 | 0.003732 |
| 24Mar2011 | 5926 | 671.37  | -24.0361 | 2 T.FNIVHTQ Splice@chr  | 3.02E-10 | 0.006203 |
| 24Mar2011 | 3698 | 975.55  | -20.6673 | 1 K.IPKMPVY chr2@1115   | 2.02E-10 | 0.003732 |
| 24Mar2011 | 343  | 419.21  | 29.38476 | 3 K.NVSMEM chr2@1445    | 5.55E-10 | 0.009839 |
| 24Mar2011 | 7203 | 1056.56 | 28.0642  | 3 I.SRVEDDS Splice@chr  | 7.62E-17 | 0        |
| 24Mar2011 | 9053 | 634.84  | 6.410455 | 2 R.VDIGDILF Splice@chr | 2.46E-12 | 0        |
| 24Mar2011 | 5445 | 748.73  | -12.625  | 3 R.LPSKENL chr4@5639   | 3.71E-11 | 4.80E-04 |
| 24Mar2011 | 5723 | 606.34  | -12.1581 | 2 C.AK+14.01 chr2@2907  | 5.18E-10 | 0.009018 |
| 24Mar2011 | 1117 | 626.82  | -18.5922 | 2 W.QFDLGK Splice@chr   | 3.75E-10 | 0.007008 |
| 24Mar2011 | 587  | 510.3   | 12.8833  | 2 R.RHVAYVF chr1@1479   | 6.40E-11 | 0.001166 |
| 24Mar2011 | 9070 | 634.84  | 6.410455 | 2 R.VDIGDILF Splice@chr | 9.20E-13 | 0        |
| 24Mar2011 | 8148 | 931.53  | 0.362106 | 2 R.CTLLYISQ chr4@2818  | 5.96E-10 | 0.009883 |
| 24Mar2011 | 2420 | 434.24  | 13.9946  | 3 _RSNDQTI chr5@6378    | 2.52E-10 | 0.003355 |
| 24Mar2011 | 4696 | 1075.06 | -6.79295 | 2 R.TCSK+14. chr2@1255  | 4.43E-10 | 0.007338 |
| 24Mar2011 | 6196 | 887.93  | 29.43791 | 2 I.DEREESTA Splice@chr | 3.62E-10 | 0.006396 |
| 24Mar2011 | 9001 | 634.84  | 6.410455 | 2 R.VDIGDILF Splice@chr | 8.43E-13 | 0        |
| 24Mar2011 | 4157 | 509.8   | -23.773  | 2 R.SSVIMLIV chr2@5767  | 4.28E-10 | 0.007157 |
| 24Mar2011 | 4438 | 897.42  | -27.6753 | 3 _QVREMH Splice@chr    | 3.36E-10 | 0.005802 |
| 24Mar2011 | 6103 | 713.38  | -5.25494 | 3 _DVGAILV Splice@chr   | 1.35E-10 | 0.002378 |
| 24Mar2011 | 2468 | 434.24  | 13.9946  | 3 _RSNDQTI chr5@6378    | 6.55E-11 | 6.78E-04 |
| 24Mar2011 | 4112 | 616.33  | -16.7632 | 2 K.LSKSVIFQ chr3@2798  | 5.14E-10 | 0.008738 |
| 24Mar2011 | 7272 | 1118.93 | 20.33541 | 3 R.NWKPKT Splice@chr   | 9.07E-12 | 0        |
| 24Mar2011 | 9026 | 634.84  | 6.410455 | 2 R.VDIGDILF Splice@chr | 1.22E-13 | 0        |
| 24Mar2011 | 7092 | 1056.56 | 28.0642  | 3 I.SRVEDDS Splice@chr  | 5.11E-13 | 0        |
| 24Mar2011 | 2938 | 1025.61 | -11.6755 | 1 K.LGLGSGL chr5@4945   | 1.69E-11 | 0        |
| 24Mar2011 | 7259 | 785.42  | 22.95449 | 1 _MPAWAF chr2@1115     | 3.20E-11 | 0        |
| 24Mar2011 | 5867 | 701.36  | 28.23715 | 3 K.NNPYMS Splice@chr   | 2.12E-10 | 0.002754 |
| 24Mar2011 | 8043 | 1143.87 | 4.220916 | 3 K.NMITGTS Splice@chr  | 2.14E-10 | 0.002754 |
| 24Mar2011 | 4228 | 1173.17 | -9.30319 | 3 K.PTMRTCC Splice@chr  | 1.61E-12 | 0        |
| 24Mar2011 | 2892 | 1025.61 | -11.6755 | 1 K.LGLGSGL chr5@4945   | 7.88E-12 | 0        |
| 24Mar2011 | 9232 | 968.13  | 14.47345 | 3 _CSIRPISG Splice@chr  | 1.61E-10 | 0.002754 |
| 24Mar2011 | 6341 | 607     | -9.70672 | 3 I.NRFNISK chrX@1250   | 1.22E-10 | 0.002187 |
| 24Mar2011 | 475  | 562.31  | -13.4391 | 2 R.FYLLLYLK Splice@chr | 5.44E-11 | 6.78E-04 |
| 24Mar2011 | 1717 | 936.48  | 27.86052 | 1 K.LNGGYEC chr2@1191   | 2.87E-11 | 0        |
| 24Mar2011 | 6872 | 622.33  | 9.587405 | 2 R.AK+14.01 chr2@4270  | 3.16E-10 | 0.004777 |
| 24Mar2011 | 1520 | 741.39  | -17.2291 | 2 K.QKSNWH chr5@1229    | 7.92E-11 | 0.001571 |
| 24Mar2011 | 3289 | 724.35  | 19.12636 | 3 V.CLTEEGK Splice@chr  | 7.19E-11 | 9.03E-04 |
| 24Mar2011 | 696  | 510.3   | 12.8833  | 2 R.RHVAYVF chr1@1479   | 1.31E-11 | 0        |
| 24Mar2011 | 6566 | 664.7   | 1.197202 | 3 _PTLNK+1. chr1@6526   | 4.50E-11 | 4.59E-04 |
| 24Mar2011 | 7914 | 742.88  | -6.21424 | 2 K.M+15.99 chr4@1648   | 2.01E-10 | 0.002754 |

|           |       |         |          |                          |          |          |
|-----------|-------|---------|----------|--------------------------|----------|----------|
| 24Mar2011 | 1681  | 936.48  | 27.86052 | 1 K.LNGGYEC Splice@chr   | 5.84E-10 | 0.009883 |
| 24Mar2011 | 2597  | 696.37  | -15.3603 | 2 _..LPTSPIGC chr5@1204  | 2.99E-10 | 0.00458  |
| 24Mar2011 | 5813  | 671.87  | -26.5383 | 2 T.FNIVHTQ Splice@chr   | 2.51E-10 | 0.003355 |
| 24Mar2011 | 8918  | 887.42  | -14.0465 | 2 S.FCLLYKGF Splice@chr  | 2.97E-10 | 0.00458  |
| 24Mar2011 | 1567  | 741.39  | -17.2291 | 2 K.QKSNWH chr5@1229     | 1.17E-11 | 0        |
| 24Mar2011 | 649   | 544.82  | 19.97836 | 2 K.SNFQPVF chr1@1327    | 2.24E-10 | 0.00296  |
| 24Mar2011 | 4249  | 829.89  | -16.1259 | 2 R.FEVFEIEC chr4@7299   | 3.07E-10 | 0.004777 |
| 24Mar2011 | 674   | 510.3   | 12.8833  | 2 R.RHVAYVF chr1@1479    | 1.31E-11 | 0        |
| 24Mar2011 | 6291  | 618.32  | 1.155298 | 3 K.LTNLSTA Splice@chr   | 3.55E-10 | 0.006396 |
| 24Mar2011 | 6862  | 833.42  | -19.2103 | 2 _..IIEPYVAV Splice@chr | 5.03E-10 | 0.008738 |
| 24Mar2011 | 5704  | 1185.93 | -27.6085 | 3 _..NNQMYMY chr5@1745   | 6.08E-10 | 0.009883 |
| 24Mar2011 | 6843  | 622.33  | 9.587405 | 2 R.AK+14.01 chr2@4270   | 3.14E-10 | 0.004777 |
| 24Mar2011 | 8220  | 868.47  | -17.3524 | 2 L.FLWSK+1 chr2@1462    | 3.42E-10 | 0.006396 |
| 24Mar2011 | 1137  | 744.38  | -27.5047 | 1 K.DGNAVLf chr5@8904    | 5.11E-10 | 0.008738 |
| 24Mar2011 | 1484  | 741.39  | -9.64508 | 2 K.FPENRHI chr2@1477    | 1.91E-10 | 0.002754 |
| 24Mar2011 | 9610  | 860.69  | 14.08015 | 4 R.FQSAAIG Splice@chr   | 6.09E-13 | 0        |
| 24Mar2011 | 7632  | 671.37  | -24.0361 | 2 T.FNIVHTQ Splice@chr   | 1.62E-10 | 0.001776 |
| 24Mar2011 | 13810 | 809.01  | -7.47824 | 2 R.FTTELLLL chr3@8986   | 2.34E-10 | 0.002445 |
| 24Mar2011 | 9715  | 629     | 0.453558 | 3 L.VFHSFFIL chrX@1261   | 3.14E-10 | 0.003842 |
| 24Mar2011 | 12073 | 930.49  | -13.6405 | 3 E.SEYSTFV7 chr4@3265   | 6.84E-10 | 0.009992 |
| 24Mar2011 | 13319 | 1047.06 | 2.482016 | 2 L.ESSQKIDL chr4@3516   | 1.15E-10 | 0.001205 |
| 24Mar2011 | 6622  | 825.96  | -15.1379 | 2 R.SARENKT Splice@chr   | 9.59E-11 | 9.17E-04 |
| 24Mar2011 | 3809  | 434.24  | 13.9946  | 3 _..RSNDQTI chr5@6378   | 2.10E-10 | 0.002175 |
| 24Mar2011 | 9951  | 1004.97 | -14.712  | 2 K.KVELALW Splice@chr   | 4.76E-23 | 0        |
| 24Mar2011 | 9795  | 965.76  | 6.091444 | 4 R.K+14.016 chr5@2085   | 5.14E-10 | 0.006945 |
| 24Mar2011 | 8225  | 616.64  | -9.1871  | 3 R.MSQEVA Splice@chr    | 1.90E-10 | 0.002042 |
| 24Mar2011 | 1419  | 510.3   | 12.8833  | 2 R.RHVAYVF chr1@1479    | 1.80E-10 | 0.002042 |
| 24Mar2011 | 9617  | 833.42  | -19.2103 | 2 _..IIEPYVAV Splice@chr | 8.36E-11 | 9.17E-04 |
| 24Mar2011 | 1363  | 510.3   | 12.8833  | 2 R.RHVAYVF chr1@1479    | 6.40E-11 | 4.63E-04 |
| 24Mar2011 | 12748 | 968.12  | 7.825792 | 3 _..GCSIVPIS Splice@chr | 4.55E-11 | 4.63E-04 |
| 24Mar2011 | 2591  | 741.38  | -23.1647 | 2 K.FPENRHI chr2@1477    | 2.75E-10 | 0.002728 |
| 24Mar2011 | 10169 | 785.42  | 22.95449 | 1 _..MPAWAF chr2@1115    | 2.29E-11 | 3.23E-04 |
| 24Mar2011 | 1848  | 488.28  | 18.24649 | 2 K.INAEFVG chr4@4519    | 5.75E-10 | 0.007729 |
| 24Mar2011 | 2682  | 741.38  | -23.1647 | 2 K.FPENRHI chr2@1477    | 2.70E-10 | 0.002728 |
| 24Mar2011 | 3753  | 434.24  | 13.9946  | 3 _..RSNDQTI chr5@6378   | 1.89E-10 | 0.002042 |
| 24Mar2011 | 9657  | 622.33  | 9.587405 | 2 R.AK+14.01 chr2@4270   | 6.88E-10 | 0.009992 |
| 24Mar2011 | 9611  | 622.33  | 9.587405 | 2 R.AK+14.01 chr2@4270   | 4.60E-10 | 0.005996 |
| 24Mar2011 | 12605 | 990.01  | -7.37741 | 2 G.CSWRNG chrX@1593     | 1.70E-11 | 3.23E-04 |
| 24Mar2011 | 9013  | 607     | -9.70672 | 3 I.NRFNISK chrX@1250    | 7.69E-11 | 4.63E-04 |
| 24Mar2011 | 2845  | 936.48  | 27.86052 | 1 K.LNGGYEC chr2@1191    | 2.91E-11 | 3.23E-04 |
| 24Mar2011 | 992   | 562.31  | -13.4391 | 2 R.FYLLLYLK Splice@chr  | 4.86E-11 | 4.63E-04 |
| 24Mar2011 | 11897 | 884.41  | -1.81927 | 3 R.YRVDLAF chr5@6435    | 1.19E-10 | 0.001205 |
| 24Mar2011 | 13282 | 860.69  | 14.08015 | 4 R.FQSAAIG Splice@chr   | 2.07E-13 | 0        |
| 24Mar2011 | 2967  | 787.43  | -1.78505 | 1 K.SDAAPAK chrX@8018    | 3.50E-11 | 3.23E-04 |
| 24Mar2011 | 9917  | 1056.56 | 28.0642  | 3 I.SRVEDDS Splice@chr   | 6.32E-15 | 0        |
| 24Mar2011 | 11137 | 732.07  | 19.51873 | 3 R.ATDDWII Splice@chr   | 1.65E-10 | 0.001776 |
| 24Mar2011 | 10943 | 742.88  | -6.21424 | 2 K.M+15.99 chr4@1648    | 6.76E-10 | 0.00986  |

|           |       |         |          |                         |          |          |
|-----------|-------|---------|----------|-------------------------|----------|----------|
| 24Mar2011 | 3864  | 434.24  | 13.9946  | 3 _RSNDQTI chr5@6378    | 5.18E-10 | 0.006945 |
| 24Mar2011 | 2546  | 741.38  | -23.1647 | 2 K.FPENRHI chr2@1477   | 6.57E-10 | 0.009183 |
| 24Mar2011 | 9998  | 1005.47 | -16.3827 | 2 K.KVELALW Splice@chr  | 8.88E-21 | 0        |
| 24Mar2011 | 3705  | 434.24  | 13.9946  | 3 _RSNDQTI chr5@6378    | 2.65E-10 | 0.002445 |
| 24Mar2011 | 8832  | 692.35  | -25.4254 | 2 K.KDKNAAI chr3@8925   | 5.96E-10 | 0.007993 |
| 24Mar2011 | 3920  | 434.24  | 13.9946  | 3 _RSNDQTI chr5@6378    | 3.51E-10 | 0.004951 |
| 24Mar2011 | 1852  | 536.29  | -10.9462 | 2 _QVEFNPII Splice@chr  | 9.86E-11 | 0.001064 |
| 24Mar2011 | 10123 | 785.42  | 22.95449 | 1 _MPAWAF chr2@1115     | 4.13E-11 | 4.63E-04 |
| 24Mar2011 | 1321  | 510.3   | 12.8833  | 2 R.RHVAYVF chr1@1479   | 1.21E-10 | 0.001205 |
| 24Mar2011 | 13209 | 970.45  | -29.5364 | 3 _VACNKM Splice@chr    | 4.15E-10 | 0.005609 |
| 24Mar2011 | 3067  | 562.3   | -24.7581 | 2 _SRTKMTS chrX@1535    | 6.16E-10 | 0.008249 |
| 24Mar2011 | 6738  | 1075.05 | -16.1169 | 2 R.TCSK+14. chr2@1253  | 4.21E-10 | 0.005609 |
| 24Mar2011 | 5291  | 975.55  | -20.6673 | 1 K.IPKMPVY chr2@1115   | 2.02E-10 | 0.002042 |
| 24Mar2011 | 1283  | 562.31  | -13.4391 | 2 R.FYLLYLYK Splice@chr | 6.41E-11 | 0        |
| 24Mar2011 | 3076  | 936.48  | 27.86052 | 1 K.LNGGYEC chr2@1191   | 4.81E-11 | 0        |
| 24Mar2011 | 1833  | 510.3   | 12.8833  | 2 R.RHVAYVF chr1@1479   | 1.31E-11 | 0        |
| 24Mar2011 | 821   | 452.23  | -1.48793 | 2 R.SGEPLSA: Splice@chr | 4.24E-11 | 0        |
| 24Mar2011 | 1234  | 464.24  | -7.11495 | 2 K.ETSFSTKk chr4@8236  | 1.52E-10 | 0.00487  |
| 24Mar2011 | 1792  | 510.3   | 12.8833  | 2 R.RHVAYVF chr1@1479   | 6.54E-12 | 0        |
| 24Mar2011 | 842   | 452.23  | -1.48793 | 2 R.SGEPLSA: Splice@chr | 7.48E-11 | 8.93E-04 |
| 24Mar2011 | 913   | 452.23  | -1.48793 | 2 R.SGEPLSA: Splice@chr | 2.44E-10 | 0.005551 |
| 24Mar2011 | 1278  | 401.74  | -8.14847 | 2 R.AIGLVSSF chr2@1017  | 2.68E-10 | 0.006319 |
| 24Mar2011 | 1873  | 510.3   | 12.8833  | 2 R.RHVAYVF chr1@1479   | 1.31E-11 | 0        |
| 24Mar2011 | 863   | 420.68  | -22.1784 | 2 R.MMTGTG chrX@9534    | 2.33E-12 | 0        |
| 24Mar2011 | 4017  | 434.24  | 13.9946  | 3 _RSNDQTI chr5@6378    | 5.63E-11 | 0        |
| 24Mar2011 | 2740  | 741.39  | -17.2291 | 2 K.QKSNWH chr5@1229    | 3.67E-11 | 0        |
| 24Mar2011 | 4437  | 501.79  | -26.5691 | 2 K.TIQFGLVI Splice@chr | 3.11E-10 | 0.007722 |
| 24Mar2011 | 1132  | 452.23  | -1.48793 | 2 R.SGEPLSA: Splice@chr | 1.86E-10 | 0.00487  |
| 24Mar2011 | 3710  | 435.75  | 9.757472 | 2 R.VLHPYNK chrX@1200   | 2.23E-10 | 0.005551 |
| 24Mar2011 | 2778  | 741.39  | -17.2291 | 2 K.QKSNWH chr5@1229    | 1.10E-11 | 0        |
| 24Mar2011 | 1265  | 593.34  | 22.56673 | 2 K.FLSAKCG chr2@1152   | 1.41E-10 | 0.001348 |
| 24Mar2011 | 777   | 422.27  | 2.173301 | 2 K.IGKGEVLI chrX@1204  | 2.50E-10 | 0.003881 |
| 24Mar2011 | 2170  | 452.23  | -1.48793 | 2 R.SGEPLSA: Splice@chr | 2.33E-11 | 0        |
| 24Mar2011 | 513   | 515.33  | 11.70274 | 2 _KQKPKFP chr5@2015    | 3.21E-10 | 0.008838 |
| 24Mar2011 | 859   | 748.36  | 16.41564 | 1 R.ATAGDGI chr3@5843   | 1.56E-12 | 0        |
| 24Mar2011 | 456   | 713.88  | -22.346  | 2 K.MKEKK+1 chr4@7820   | 2.57E-10 | 0.003881 |
| 24Mar2011 | 2239  | 506.77  | -14.421  | 2 _VDKNVYF chr4@1192    | 2.42E-10 | 0.002628 |
| 24Mar2011 | 2269  | 452.23  | -1.48793 | 2 R.SGEPLSA: Splice@chr | 1.59E-11 | 0        |
| 24Mar2011 | 1984  | 1115.55 | -23.2926 | 1 R.RMPPAA chr2@1507    | 2.27E-10 | 0.002628 |
| 24Mar2011 | 2217  | 452.23  | -1.48793 | 2 R.SGEPLSA: Splice@chr | 1.39E-10 | 0.001348 |
| 24Mar2011 | 2044  | 741.39  | -17.2291 | 2 K.QKSNWH chr5@1229    | 1.92E-11 | 0        |
| 24Mar2011 | 7341  | 648.87  | 2.405882 | 2 R.QM+15.9 chr3@9694   | 2.60E-10 | 0.003495 |
| 24Mar2011 | 2004  | 741.38  | -23.1647 | 2 K.FPENRHI chr2@1477   | 2.53E-10 | 0.003495 |
| 24Mar2011 | 4771  | 616.33  | -16.7632 | 2 K.LSKSVIFQ chr3@2798  | 6.80E-10 | 0.008953 |
| 24Mar2011 | 7224  | 606.66  | -18.8783 | 3 I.NRFNISK chrX@1250   | 1.46E-10 | 0.001651 |
| 24Mar2011 | 3236  | 533.82  | 16.26677 | 2 K.TNIYTILTI chr5@1329 | 5.78E-10 | 0.007829 |
| 24Mar2011 | 3581  | 1025.61 | -11.6755 | 1 K.LGLGSGL chr5@4945   | 5.78E-11 | 3.51E-04 |

|           |      |         |          |                         |          |          |
|-----------|------|---------|----------|-------------------------|----------|----------|
| 24Mar2011 | 1062 | 510.3   | 12.8833  | 2 R.RHVAYVF chr1@1479   | 6.54E-12 | 0        |
| 24Mar2011 | 777  | 562.31  | -13.4391 | 2 R.FYLLYLYK Splice@chr | 9.72E-11 | 0.001651 |
| 24Mar2011 | 5451 | 1004.81 | -8.08885 | 3 K.AVMFTVI Splice@chr  | 1.17E-15 | 0        |
| 24Mar2011 | 2088 | 741.39  | -17.2291 | 2 K.QKSNWH chr5@1229    | 2.74E-11 | 0        |
| 24Mar2011 | 6627 | 671.37  | -24.0361 | 2 T.FNIVHTQ Splice@chr  | 3.20E-10 | 0.004717 |
| 24Mar2011 | 6628 | 1075.05 | -16.1169 | 2 R.TCSK+14. chr2@1253  | 3.92E-10 | 0.005288 |
| 24Mar2011 | 5436 | 1075.06 | -6.79295 | 2 R.TCSK+14. chr2@1253  | 8.95E-11 | 0.001651 |
| 24Mar2011 | 5387 | 1075.06 | -6.79295 | 2 R.TCSK+14. chr2@1253  | 6.68E-11 | 0.001046 |
| 24Mar2011 | 6196 | 671.37  | -24.0361 | 2 T.FNIVHTQ Splice@chr  | 6.27E-11 | 6.99E-04 |
| 24Mar2011 | 5491 | 626.31  | 6.247018 | 2 K.SEELMYN chr4@2673   | 2.22E-13 | 0        |
| 24Mar2011 | 593  | 1115.55 | -23.2926 | 1 R.RMPPAA chr2@1507    | 9.72E-11 | 0.001651 |
| 24Mar2011 | 5287 | 825.96  | -15.1379 | 2 R.SARENKT Splice@chr  | 1.41E-11 | 0        |
| 24Mar2011 | 5152 | 897.42  | -27.6753 | 3 _QVREMH Splice@chr    | 9.94E-11 | 0.001651 |
| 24Mar2011 | 5778 | 715.16  | -22.3572 | 5 _TWISTKPI Splice@chr  | 3.80E-10 | 0.005288 |
| 24Mar2011 | 6082 | 671.37  | -24.0361 | 2 T.FNIVHTQ Splice@chr  | 2.86E-10 | 0.0038   |
| 24Mar2011 | 307  | 437.26  | -8.67422 | 2 R.QLGFPIAI chr3@2252  | 4.43E-10 | 0.005852 |
| 24Mar2011 | 1419 | 488.28  | 18.24649 | 2 K.INAEFVG chr4@4519   | 7.21E-10 | 0.008953 |
| 24Mar2011 | 6127 | 671.37  | -24.0361 | 2 T.FNIVHTQ Splice@chr  | 1.03E-10 | 0.001651 |
| 24Mar2011 | 1029 | 510.3   | 12.8833  | 2 R.RHVAYVF chr1@1479   | 6.54E-12 | 0        |
| 24Mar2011 | 534  | 572.38  | 17.19865 | 2 R.KTRSVVG chr2@8214   | 6.18E-10 | 0.007829 |
| 24Mar2011 | 2472 | 434.24  | 13.9946  | 3 _RSNDQTI chr5@6378    | 4.58E-11 | 9.00E-04 |
| 24Mar2011 | 673  | 510.3   | 12.8833  | 2 R.RHVAYVF chr1@1479   | 6.54E-12 | 0        |
| 24Mar2011 | 4438 | 1179.65 | -27.0001 | 1 R.VKYSVK+ chr5@7993   | 3.78E-10 | 0.009353 |
| 24Mar2011 | 4156 | 509.8   | -23.773  | 2 R.SSVIMLIV chr2@5767  | 5.33E-11 | 0.001338 |
| 24Mar2011 | 3362 | 724.35  | 19.12636 | 3 V.CLTEEGK Splice@chr  | 6.29E-12 | 0        |
| 24Mar2011 | 1519 | 741.39  | -17.2291 | 2 K.QKSNWH chr5@1229    | 8.29E-11 | 0.002539 |
| 24Mar2011 | 1486 | 741.39  | -17.2291 | 2 K.QKSNWH chr5@1229    | 2.67E-11 | 4.69E-04 |
| 24Mar2011 | 732  | 587.34  | 11.13845 | 2 R.ARAIEK+ chr4@5939   | 2.35E-10 | 0.005248 |
| 24Mar2011 | 644  | 510.3   | 12.8833  | 2 R.RHVAYVF chr1@1479   | 6.40E-11 | 0.0022   |
| 24Mar2011 | 4112 | 509.8   | -23.773  | 2 R.SSVIMLIV chr2@5767  | 5.12E-11 | 9.00E-04 |
| 24Mar2011 | 4119 | 1017.59 | -22.5744 | 1 R.SSVIMLIV chr2@5767  | 1.88E-11 | 0        |
| 24Mar2011 | 1587 | 741.39  | -17.2291 | 2 K.QKSNWH chr5@1229    | 3.05E-11 | 9.00E-04 |
| 24Mar2011 | 2954 | 1025.61 | -11.6755 | 1 K.LGLGSGL chr5@4945   | 4.13E-11 | 9.00E-04 |
| 24Mar2011 | 2598 | 533.82  | 16.26677 | 2 K.TNIYTILTI chr5@1329 | 3.17E-10 | 0.006327 |
| 24Mar2011 | 1552 | 741.39  | -17.2291 | 2 K.QKSNWH chr5@1229    | 2.14E-11 | 0        |
| 24Mar2011 | 4319 | 509.8   | -23.773  | 2 R.SSVIMLIV chr2@5767  | 4.54E-11 | 6.25E-04 |
| 24Mar2011 | 2020 | 936.48  | 27.86052 | 1 K.LNGGYEC chr2@1191   | 2.91E-11 | 0        |
| 24Mar2011 | 1785 | 741.39  | -17.2291 | 2 K.QKSNWH chr5@1229    | 1.16E-10 | 0.001142 |
| 24Mar2011 | 264  | 629.4   | 2.233974 | 1 K.LAVAGAK Splice@chr  | 2.54E-10 | 0.00443  |
| 24Mar2011 | 1819 | 741.39  | -17.2291 | 2 K.QKSNWH chr5@1229    | 6.78E-12 | 0        |
| 24Mar2011 | 740  | 562.31  | -13.4391 | 2 R.FYLLYLYK Splice@chr | 6.01E-11 | 0.001142 |
| 24Mar2011 | 2094 | 626.3   | -9.76097 | 2 R.LCESGAA Splice@chr  | 1.84E-15 | 0        |
| 24Mar2011 | 4357 | 509.8   | -23.773  | 2 R.SSVIMLIV chr2@5767  | 1.12E-10 | 0.001142 |
| 24Mar2011 | 1861 | 741.39  | -17.2291 | 2 K.QKSNWH chr5@1229    | 5.52E-11 | 0.001142 |
| 24Mar2011 | 4331 | 616.33  | -16.7632 | 2 K.LSKSVIFQ chr3@2798  | 3.00E-10 | 0.006579 |
| 24Mar2011 | 2747 | 434.24  | 13.9946  | 3 _RSNDQTI chr5@6378    | 1.21E-10 | 0.001142 |
| 24Mar2011 | 115  | 544.29  | 17.07677 | 2 K.QNFIHET chr1@5247   | 3.45E-10 | 0.007513 |

|           |       |         |          |                         |          |          |
|-----------|-------|---------|----------|-------------------------|----------|----------|
| 24Mar2011 | 133   | 748.36  | 16.41564 | 1 R.ATAGDGI chr3@5845   | 3.15E-10 | 0.007513 |
| 24Mar2011 | 2356  | 936.48  | 27.86052 | 1 K.LNGGYEC chr2@1191   | 1.21E-10 | 0.002735 |
| 24Mar2011 | 2456  | 626.3   | -9.76097 | 2 R.LCESGAA Splice@chr  | 1.47E-14 | 0        |
| 24Mar2011 | 2110  | 741.38  | -23.1647 | 2 K.FPENRHI chr2@1477   | 1.60E-10 | 0.003591 |
| 24Mar2011 | 2063  | 741.38  | -23.1647 | 2 K.FPENRHI chr2@1477   | 2.85E-10 | 0.005963 |
| 24Mar2011 | 939   | 510.3   | 12.8833  | 2 R.RHVAYVF chr1@1479   | 1.21E-10 | 0.002735 |
| 24Mar2011 | 976   | 510.3   | 12.8833  | 2 R.RHVAYVF chr1@1479   | 1.23E-10 | 0.002735 |
| 24Mar2011 | 2022  | 741.38  | -23.1647 | 2 K.FPENRHI chr2@1477   | 6.11E-11 | 0        |
| 24Mar2011 | 2293  | 936.48  | 27.86052 | 1 K.LNGGYEC chr2@1191   | 3.70E-11 | 0        |
| 24Mar2011 | 960   | 510.3   | 12.8833  | 2 R.RHVAYVF chr1@1479   | 6.40E-11 | 0        |
| 24Mar2011 | 993   | 510.3   | 12.8833  | 2 R.RHVAYVF chr1@1479   | 6.54E-12 | 0        |
| 24Mar2011 | 2355  | 432.75  | 10.60282 | 2 R.VYQVLDK chr1@9136   | 4.71E-10 | 0.003865 |
| 24Mar2011 | 2280  | 787.43  | -1.78505 | 1 K.SDAAPAK chrX@8018   | 1.47E-11 | 0        |
| 24Mar2011 | 2249  | 936.48  | 27.86052 | 1 K.LNGGYEC chr2@1191   | 1.76E-11 | 0        |
| 24Mar2011 | 2336  | 936.48  | 27.86052 | 1 K.LNGGYEC chr2@1191   | 6.96E-10 | 0.009337 |
| 24Mar2011 | 754   | 401.74  | -8.14847 | 2 R.AIGLVSSF chr2@1017  | 3.15E-10 | 0.00197  |
| 24Mar2011 | 702   | 464.24  | -7.11495 | 2 K.ETSFSTK chr4@8236   | 2.59E-10 | 0.00197  |
| 24Mar2011 | 1979  | 936.48  | 27.86052 | 1 K.LNGGYEC chr2@1191   | 5.85E-11 | 0.001071 |
| 24Mar2011 | 7441  | 1005.47 | -16.3827 | 2 K.KVELALW Splice@chr  | 2.81E-22 | 0        |
| 24Mar2011 | 1844  | 741.38  | -23.1647 | 2 K.FPENRHI chr2@1477   | 2.19E-10 | 0.0034   |
| 24Mar2011 | 1806  | 741.38  | -23.1647 | 2 K.FPENRHI chr2@1477   | 4.31E-10 | 0.007912 |
| 24Mar2011 | 1772  | 741.38  | -23.1647 | 2 K.FPENRHI chr2@1477   | 1.97E-10 | 0.00261  |
| 24Mar2011 | 3833  | 630.86  | 16.57085 | 2 K.SQISQAT Splice@chr  | 1.86E-10 | 0.002415 |
| 24Mar2011 | 1466  | 510.3   | 12.8833  | 2 R.RHVAYVF chr1@1479   | 6.40E-11 | 0.001267 |
| 24Mar2011 | 10042 | 1147.24 | 4.705638 | 3 R.FQSAAIG Splice@chr  | 1.12E-14 | 0        |
| 24Mar2011 | 7140  | 622.33  | 9.587405 | 2 R.AK+14.01 chr2@4270  | 1.33E-10 | 0.001629 |
| 24Mar2011 | 2606  | 693.87  | -6.6949  | 2 V.ICVAVGD chr5@1065   | 1.85E-10 | 0.002219 |
| 24Mar2011 | 9913  | 959.04  | 19.81385 | 2 Y.NNCKLNS chrX@1250   | 3.04E-10 | 0.004718 |
| 24Mar2011 | 1371  | 744.38  | -27.5047 | 1 K.DGNAVLI chr5@8904   | 3.41E-10 | 0.005474 |
| 24Mar2011 | 4975  | 1075.05 | -16.1169 | 2 R.TCSK+14. chr2@1255  | 1.55E-10 | 0.001821 |
| 24Mar2011 | 1879  | 741.38  | -23.1647 | 2 K.FPENRHI chr2@1477   | 2.15E-10 | 0.003004 |
| 24Mar2011 | 2771  | 434.24  | 13.9946  | 3 _RSNDQTI chr5@6378    | 8.19E-11 | 0.001451 |
| 24Mar2011 | 1201  | 510.3   | 12.8833  | 2 R.RHVAYVF chr1@1479   | 1.21E-10 | 0.001629 |
| 24Mar2011 | 766   | 510.3   | 12.8833  | 2 R.RHVAYVF chr1@1479   | 1.27E-10 | 0.001629 |
| 24Mar2011 | 10376 | 809.52  | 2.833995 | 2 R.FTTELLLL chr3@8986  | 1.60E-10 | 0.001821 |
| 24Mar2011 | 5953  | 1187.91 | -26.8667 | 3 K.NQPIHVF Splice@chr  | 9.36E-11 | 0.001451 |
| 24Mar2011 | 1027  | 473.58  | -15.5845 | 3 G.SVGSASR chr4@3039   | 1.48E-10 | 0.001629 |
| 24Mar2011 | 7182  | 622.33  | 9.587405 | 2 R.AK+14.01 chr2@4270  | 4.49E-10 | 0.007912 |
| 24Mar2011 | 2017  | 936.48  | 27.86052 | 1 K.LNGGYEC chr2@1191   | 1.75E-11 | 0        |
| 24Mar2011 | 7238  | 1153.22 | -26.2628 | 3 F.EGIRTTGG Splice@chr | 5.05E-12 | 0        |
| 24Mar2011 | 7450  | 857.95  | -28.6314 | 2 N.M+15.99 chrX@1774   | 1.31E-10 | 0.001629 |
| 24Mar2011 | 7589  | 785.42  | 22.95449 | 1 _MPAWAF chr2@1115     | 2.17E-11 | 2.22E-04 |
| 24Mar2011 | 6639  | 607     | -9.70672 | 3 I.NRFNISK chrX@1250   | 6.98E-11 | 0.001267 |
| 24Mar2011 | 4441  | 616.33  | -16.7632 | 2 K.LSKSVIFQ chr3@2798  | 5.36E-10 | 0.009933 |
| 24Mar2011 | 4863  | 825.96  | -15.1379 | 2 R.SARENKT Splice@chr  | 2.34E-10 | 0.003779 |
| 24Mar2011 | 10034 | 1147.24 | 4.705638 | 3 R.FQSAAIG Splice@chr  | 3.36E-15 | 0        |
| 24Mar2011 | 792   | 510.3   | 12.8833  | 2 R.RHVAYVF chr1@1479   | 1.21E-10 | 0.001629 |

|           |       |         |          |                        |          |          |
|-----------|-------|---------|----------|------------------------|----------|----------|
| 24Mar2011 | 9368  | 965.53  | -19.1507 | 2 F.FLRQIRQI chr4@3226 | 3.91E-11 | 6.57E-04 |
| 24Mar2011 | 3033  | 693.87  | -6.6949  | 2 V.ICVAVGD chr5@1063  | 5.40E-10 | 0.007524 |
| 24Mar2011 | 7715  | 622.33  | 9.587405 | 2 R.AK+14.01 chr2@4270 | 1.28E-10 | 0.001134 |
| 24Mar2011 | 5334  | 586.34  | 11.36604 | 2 R.LVILFFLF chr2@6458 | 4.73E-10 | 0.00694  |
| 24Mar2011 | 10700 | 809.02  | 4.909957 | 2 R.FTTELLLL chr3@8986 | 3.23E-11 | 2.42E-04 |
| 24Mar2011 | 3895  | 548.84  | -21.1679 | 2 R.LKRNTPV Splice@chr | 4.99E-11 | 4.65E-04 |
| 24Mar2011 | 1534  | 562.83  | -11.5155 | 2 K.RQERGILI chr1@1844 | 5.66E-10 | 0.008106 |
| 24Mar2011 | 8789  | 946.46  | -26.1447 | 2 K.MWMNV Splice@chr   | 5.49E-10 | 0.007932 |
| 24Mar2011 | 2383  | 936.48  | 27.86052 | 1 K.LNGGYEC chr2@1191  | 5.26E-11 | 4.65E-04 |
| 24Mar2011 | 8382  | 675.33  | -24.7716 | 2 K.IEMEFLVI chrX@1244 | 5.08E-10 | 0.007119 |
| 24Mar2011 | 958   | 402.25  | 12.64423 | 2 R.AIGLVSSF chr2@1017 | 5.62E-10 | 0.008106 |
| 24Mar2011 | 2228  | 741.39  | -17.2291 | 2 K.QKSNWH chr5@1229   | 3.16E-11 | 2.42E-04 |
| 24Mar2011 | 2121  | 741.39  | -17.2291 | 2 K.QKSNWH chr5@1229   | 6.90E-11 | 4.65E-04 |
| 24Mar2011 | 3236  | 434.24  | 13.9946  | 3 _RSNDQTI chr5@6378   | 5.39E-10 | 0.007524 |
| 24Mar2011 | 5346  | 825.46  | -13.1033 | 2 R.SARENKT Splice@chr | 2.01E-10 | 0.001974 |
| 24Mar2011 | 5488  | 1075.05 | -16.1169 | 2 R.TCSK+14. chr2@1253 | 9.07E-11 | 6.92E-04 |
| 24Mar2011 | 8099  | 983.97  | 4.629411 | 2 R.SFSTIPDS chr2@1305 | 9.20E-16 | 0        |
| 24Mar2011 | 2196  | 741.39  | -9.64508 | 2 K.FPENRHI chr2@1477  | 6.46E-11 | 4.65E-04 |
| 24Mar2011 | 3121  | 693.87  | -6.6949  | 2 V.ICVAVGD chr5@1063  | 8.23E-11 | 4.65E-04 |
| 24Mar2011 | 9438  | 751.37  | -29.1192 | 4 R.ICIKAQRS chrX@1213 | 2.55E-10 | 0.002824 |
| 24Mar2011 | 2158  | 741.39  | -17.2291 | 2 K.QKSNWH chr5@1229   | 2.69E-11 | 2.42E-04 |
| 24Mar2011 | 8184  | 1118.93 | 20.33541 | 3 R.NWKPKT Splice@chr  | 2.94E-12 | 0        |
| 24Mar2011 | 2117  | 531.29  | -6.73762 | 2 K.MPMGV chr2@6727    | 5.87E-10 | 0.008106 |
| 24Mar2011 | 8805  | 1089.18 | -19.7299 | 3 Q.LMLLQY chr1@1059   | 5.56E-10 | 0.008106 |
| 24Mar2011 | 7289  | 833.93  | -9.2006  | 2 _IIEPYVAV Splice@chr | 3.46E-11 | 2.42E-04 |
| 24Mar2011 | 4883  | 829.89  | -16.1259 | 2 R.FEVFEIEC chr4@7299 | 6.35E-10 | 0.005502 |
| 24Mar2011 | 3341  | 1025.61 | -11.6755 | 1 K.LGLGSGL chr5@4945  | 1.87E-11 | 3.93E-04 |
| 24Mar2011 | 1185  | 744.38  | -27.5047 | 1 K.DGNAVL chr5@8904   | 1.70E-10 | 0.001197 |
| 24Mar2011 | 7872  | 622.33  | 9.587405 | 2 R.AK+14.01 chr2@4270 | 7.80E-10 | 0.007348 |
| 24Mar2011 | 1020  | 510.3   | 12.8833  | 2 R.RHVAYVF chr1@1479  | 1.21E-10 | 0.00104  |
| 24Mar2011 | 8181  | 1004.97 | -14.712  | 2 K.KVELALV Splice@chr | 1.11E-22 | 0        |
| 24Mar2011 | 9617  | 665.37  | -26.6417 | 2 Q.INNK+14 Splice@chr | 6.22E-10 | 0.005353 |
| 24Mar2011 | 9511  | 886.77  | -29.5706 | 3 G.FLFKSLC chr2@9496  | 1.07E-09 | 0.009921 |
| 24Mar2011 | 8087  | 782.89  | 1.170929 | 2 K.FFFFEKF Splice@chr | 4.37E-10 | 0.004461 |
| 24Mar2011 | 7003  | 713.37  | -19.4204 | 3 _DVGAILV Splice@chr  | 1.54E-10 | 0.00104  |
| 24Mar2011 | 932   | 510.3   | 12.8833  | 2 R.RHVAYVF chr1@1479  | 6.57E-11 | 8.99E-04 |
| 24Mar2011 | 3809  | 438.91  | -18.0263 | 3 _KNDKKT chr2@4168    | 2.64E-10 | 0.001521 |
| 24Mar2011 | 1562  | 406.76  | 27.79114 | 2 _LLGMLHK Splice@chr  | 1.01E-09 | 0.009003 |
| 24Mar2011 | 801   | 510.3   | 12.8833  | 2 R.RHVAYVF chr1@1479  | 6.85E-11 | 8.99E-04 |
| 24Mar2011 | 7698  | 753.96  | 0.162122 | 2 K.K+14.016 chr2@1375 | 6.84E-10 | 0.006288 |
| 24Mar2011 | 4687  | 616.33  | -16.7632 | 2 K.LSKSVIFQ chr3@2798 | 6.99E-10 | 0.006444 |
| 24Mar2011 | 839   | 510.3   | 12.8833  | 2 R.RHVAYVF chr1@1479  | 1.31E-11 | 1.97E-04 |
| 24Mar2011 | 677   | 510.3   | 12.8833  | 2 R.RHVAYVF chr1@1479  | 7.05E-11 | 8.99E-04 |
| 24Mar2011 | 9747  | 859.44  | -29.7537 | 3 R.M+15.99 Splice@chr | 6.30E-10 | 0.005502 |
| 24Mar2011 | 1645  | 741.38  | -23.1647 | 2 K.FPENRHI chr2@1477  | 2.06E-10 | 0.001357 |
| 24Mar2011 | 1111  | 744.38  | -27.5047 | 1 K.DGNAVL chr5@8904   | 1.70E-10 | 0.001197 |
| 24Mar2011 | 1917  | 936.48  | 27.86052 | 1 K.LNGGYEC chr2@1191  | 2.07E-10 | 0.001357 |

|           |       |         |          |                         |          |          |
|-----------|-------|---------|----------|-------------------------|----------|----------|
| 24Mar2011 | 2610  | 693.87  | -6.6949  | 2 V.ICVAVGD chr5@1065   | 4.17E-10 | 0.004136 |
| 24Mar2011 | 597   | 510.3   | 12.8833  | 2 R.RHVAYVF chr1@1479   | 6.40E-11 | 8.99E-04 |
| 24Mar2011 | 6436  | 1187.91 | -26.8667 | 3 K.NQPIHVF Splice@chr  | 2.24E-10 | 0.001357 |
| 24Mar2011 | 1874  | 936.48  | 27.86052 | 1 K.LNGGYEC chr2@1191   | 1.77E-11 | 1.97E-04 |
| 24Mar2011 | 7824  | 622.33  | 9.587405 | 2 R.AK+14.01 chr2@4270  | 9.86E-10 | 0.008862 |
| 24Mar2011 | 8340  | 785.42  | 22.95449 | 1 _.MPAWAF chr2@1115    | 1.74E-11 | 1.97E-04 |
| 24Mar2011 | 5231  | 825.96  | -15.1379 | 2 R.SARENKT Splice@chr  | 1.07E-10 | 0.00104  |
| 24Mar2011 | 497   | 510.3   | 12.8833  | 2 R.RHVAYVF chr1@1479   | 6.40E-11 | 8.99E-04 |
| 24Mar2011 | 9571  | 762.81  | 21.17414 | 5 _.SDNDLFE Splice@chr  | 9.97E-10 | 0.009003 |
| 24Mar2011 | 1606  | 741.38  | -23.1647 | 2 K.FPENRHI chr2@1477   | 4.96E-10 | 0.004907 |
| 24Mar2011 | 5361  | 1075.05 | -16.1169 | 2 R.TCSK+14. chr2@1255  | 1.65E-10 | 0.001197 |
| 24Mar2011 | 9580  | 754.1   | 20.46108 | 3 _.DLLEALD Splice@chr  | 2.18E-10 | 0.001357 |
| 24Mar2011 | 714   | 510.3   | 12.8833  | 2 R.RHVAYVF chr1@1479   | 6.57E-11 | 8.99E-04 |
| 24Mar2011 | 1685  | 741.38  | -23.1647 | 2 K.FPENRHI chr2@1477   | 1.33E-10 | 0.00104  |
| 24Mar2011 | 872   | 510.3   | 12.8833  | 2 R.RHVAYVF chr1@1479   | 1.25E-10 | 0.00104  |
| 24Mar2011 | 763   | 510.3   | 12.8833  | 2 R.RHVAYVF chr1@1479   | 6.67E-11 | 8.99E-04 |
| 24Mar2011 | 11638 | 1105.21 | -11.0549 | 3 K.LAFDDAI Splice@chr  | 3.67E-10 | 0.003496 |
| 24Mar2011 | 11504 | 809.01  | -7.47824 | 2 R.FTTELLLL chr3@8986  | 1.71E-10 | 0.001197 |
| 24Mar2011 | 8504  | 1118.92 | 11.45146 | 3 R.NWKPKT Splice@chr   | 3.82E-10 | 0.003817 |
| 24Mar2011 | 6101  | 671.37  | -24.0361 | 2 T.FNIVHTQ Splice@chr  | 9.74E-10 | 0.008238 |
| 24Mar2011 | 9103  | 819.93  | 4.811536 | 2 R.RAPCIYPI chr3@4428  | 5.03E-10 | 0.004907 |
| 24Mar2011 | 525   | 510.3   | 12.8833  | 2 R.RHVAYVF chr1@1479   | 1.28E-10 | 0.00104  |
| 24Mar2011 | 7172  | 501.3   | -0.81333 | 3 K.FLVK+14. chrX@8948  | 1.00E-09 | 0.009003 |
| 24Mar2011 | 11094 | 860.69  | 14.08015 | 4 R.FQSAAIG Splice@chr  | 2.18E-13 | 0        |
| 24Mar2011 | 11090 | 1147.24 | 4.705638 | 3 R.FQSAAIG Splice@chr  | 4.00E-16 | 0        |
| 24Mar2011 | 3127  | 474.78  | -7.40756 | 2 R.IYIPAMLI chr2@2768  | 6.40E-10 | 0.005654 |
| 24Mar2011 | 6148  | 671.37  | -24.0361 | 2 T.FNIVHTQ Splice@chr  | 3.44E-10 | 0.003496 |
| 24Mar2011 | 560   | 510.3   | 12.8833  | 2 R.RHVAYVF chr1@1479   | 6.40E-11 | 8.99E-04 |
| 24Mar2011 | 10905 | 959.54  | 18.06294 | 2 Y.NNCKLNS chrX@1250   | 4.03E-10 | 0.003979 |
| 24Mar2011 | 6414  | 833.41  | -5.13266 | 2 _.IDM+15.5 chrX@3237  | 3.38E-10 | 0.007757 |
| 24Mar2011 | 4766  | 509.8   | -23.773  | 2 R.SSVIMLIV chr2@5767  | 3.76E-11 | 7.14E-04 |
| 24Mar2011 | 9563  | 884.41  | -1.81927 | 3 R.YRVDLAF chr5@6435   | 3.69E-10 | 0.007954 |
| 24Mar2011 | 6689  | 1128.04 | -2.03078 | 2 _.IPSAVGY Splice@chr  | 1.15E-11 | 4.91E-04 |
| 24Mar2011 | 10577 | 1147.25 | 13.44098 | 3 R.FQSAAIG Splice@chr  | 9.29E-16 | 0        |
| 24Mar2011 | 8536  | 722.45  | -4.95112 | 2 R.RK+14.01 Splice@chr | 4.35E-10 | 0.008725 |
| 24Mar2011 | 1851  | 741.39  | -17.2291 | 2 K.QKSNWH chr5@1229    | 2.35E-11 | 4.91E-04 |
| 24Mar2011 | 2612  | 634.88  | -7.6068  | 2 _.YNYKITLI chr2@6867  | 2.65E-10 | 0.004818 |
| 24Mar2011 | 6267  | 748.72  | -26.0118 | 3 R.LPSKENLI chr4@5639  | 3.85E-10 | 0.008725 |
| 24Mar2011 | 11011 | 1105.21 | -11.0549 | 3 K.LAFDDAI Splice@chr  | 1.77E-10 | 0.002895 |
| 24Mar2011 | 7962  | 1005.47 | -16.3827 | 2 K.KVELALW Splice@chr  | 5.18E-21 | 0        |
| 24Mar2011 | 9374  | 781.41  | -2.97197 | 2 K.FNFAFAL Splice@chr  | 3.93E-10 | 0.008725 |
| 24Mar2011 | 5318  | 1075.06 | -6.79295 | 2 R.TCSK+14. chr2@1255  | 2.11E-10 | 0.003319 |
| 24Mar2011 | 3489  | 1025.61 | -11.6755 | 1 K.LGLGSGL chr5@4945   | 1.14E-11 | 4.91E-04 |
| 24Mar2011 | 7186  | 833.93  | -9.2006  | 2 _.IIEPYVAV Splice@chr | 2.39E-10 | 0.004184 |
| 24Mar2011 | 4773  | 1017.59 | -22.5744 | 1 R.SSVIMLIV chr2@5767  | 1.88E-11 | 4.91E-04 |
| 24Mar2011 | 9461  | 1003.18 | 7.145987 | 3 R.CWNRRA Splice@chr   | 3.12E-12 | 0        |
| 24Mar2011 | 10585 | 1147.24 | 4.705638 | 3 R.FQSAAIG Splice@chr  | 9.51E-12 | 4.91E-04 |

|           |      |         |          |                          |          |          |
|-----------|------|---------|----------|--------------------------|----------|----------|
| 24Mar2011 | 4811 | 509.8   | -23.773  | 2 R.SSVIMLIV chr2@5767   | 2.12E-10 | 0.003537 |
| 24Mar2011 | 2076 | 936.48  | 27.86052 | 1 K.LNGGYEC chr2@1191    | 4.67E-11 | 7.14E-04 |
| 24Mar2011 | 1996 | 460.25  | -0.06645 | 2 K.IAECSVLK chrX@2064   | 1.23E-10 | 0.001144 |
| 24Mar2011 | 6686 | 701.36  | 28.23715 | 3 K.NNPYMS Splice@chr    | 2.00E-10 | 0.003319 |
| 24Mar2011 | 8385 | 747.39  | 13.7081  | 2 K.MLRFNEC chr2@8359    | 3.79E-10 | 0.008374 |
| 24Mar2011 | 7396 | 938.46  | 22.50833 | 2 R.ECSQSDS chr2@8876    | 1.80E-10 | 0.002895 |
| 24Mar2011 | 7111 | 640.61  | 2.862811 | 4 K.MLK+14.1 chr2@3526   | 3.43E-10 | 0.007757 |
| 24Mar2011 | 7707 | 622.33  | 9.587405 | 2 R.AK+14.01 chr2@4270   | 1.85E-10 | 0.002895 |
| 24Mar2011 | 537  | 401.74  | -8.14847 | 2 R.AIGLVSSF chr2@1017   | 1.99E-10 | 0.003319 |
| 24Mar2011 | 9176 | 886.77  | -29.5706 | 3 G.FLFKSLC\ chr2@9496   | 2.05E-10 | 0.003319 |
| 24Mar2011 | 6082 | 671.37  | -24.0361 | 2 T.FNIVHTQ Splice@chr   | 1.58E-10 | 0.002471 |
| 24Mar2011 | 5216 | 825.96  | -15.1379 | 2 R.SARENKT Splice@chr   | 6.18E-11 | 9.38E-04 |
| 24Mar2011 | 1888 | 741.39  | -9.64508 | 2 K.FPENRHL\ chr2@1477   | 1.27E-10 | 0.001368 |
| 24Mar2011 | 1163 | 562.83  | -11.5155 | 2 K.RQERGILI chr1@1844   | 4.38E-10 | 0.008725 |
| 24Mar2011 | 8101 | 785.42  | 22.95449 | 1 _ .MPAWAF chr2@1119    | 8.47E-11 | 0.001144 |
| 24Mar2011 | 1926 | 741.38  | -23.1647 | 2 K.FPENRHL\ chr2@1477   | 4.46E-10 | 0.00933  |
| 24Mar2011 | 6522 | 1153.22 | -26.2628 | 3 F.EGIRTGG Splice@chr   | 1.71E-14 | 0        |
| 24Mar2011 | 8851 | 634.83  | -9.39461 | 2 R.VDIGDILF Splice@chr  | 1.07E-12 | 0        |
| 24Mar2011 | 9551 | 860.68  | 2.433027 | 4 R.FQSAAIG Splice@chr   | 1.58E-11 | 8.12E-04 |
| 24Mar2011 | 1411 | 741.38  | -23.1647 | 2 K.FPENRHL\ chr2@1477   | 1.52E-10 | 0.003135 |
| 24Mar2011 | 6871 | 785.42  | 22.95449 | 1 _ .MPAWAF chr2@1119    | 3.54E-11 | 0.001016 |
| 24Mar2011 | 1034 | 510.3   | 12.8833  | 2 R.RHVAYVF chr1@1479    | 1.28E-10 | 0.002676 |
| 24Mar2011 | 4367 | 626.3   | -9.76097 | 2 K.SEELMYN chr4@2673    | 7.67E-14 | 0        |
| 24Mar2011 | 9561 | 1147.24 | 4.705638 | 3 R.FQSAAIG Splice@chr   | 4.01E-14 | 0        |
| 24Mar2011 | 8834 | 634.84  | 6.410455 | 2 R.VDIGDILF Splice@chr  | 4.67E-13 | 0        |
| 24Mar2011 | 1127 | 510.3   | 12.8833  | 2 R.RHVAYVF chr1@1479    | 6.40E-11 | 0.001016 |
| 24Mar2011 | 6007 | 833.93  | -9.2006  | 2 _ .IIEPYVAV Splice@chr | 3.03E-10 | 0.007433 |
| 24Mar2011 | 6494 | 622.33  | 9.587405 | 2 R.AK+14.01 chr2@4270   | 2.68E-10 | 0.006551 |
| 24Mar2011 | 6453 | 622.33  | 9.587405 | 2 R.AK+14.01 chr2@4270   | 2.35E-10 | 0.005183 |
| 24Mar2011 | 1510 | 936.48  | 27.86052 | 1 K.LNGGYEC chr2@1191    | 3.32E-11 | 0.001016 |
| 24Mar2011 | 7661 | 912.99  | -3.34628 | 2 F.TEMPLGC chrX@9861    | 9.62E-12 | 8.12E-04 |
| 24Mar2011 | 6735 | 1005.47 | -16.3827 | 2 K.KVELALW Splice@chr   | 4.12E-21 | 0        |
| 24Mar2011 | 2141 | 434.24  | 13.9946  | 3 _ .RSNDQTI chr5@6378   | 3.55E-10 | 0.00962  |
| 24Mar2011 | 2101 | 434.24  | 13.9946  | 3 _ .RSNDQTI chr5@6378   | 3.26E-10 | 0.008545 |
| 24Mar2011 | 4177 | 825.96  | -15.1379 | 2 R.SARENKT Splice@chr   | 6.24E-11 | 0.001016 |
| 24Mar2011 | 9081 | 1055.86 | -22.4368 | 3 K.SGTIFDNI Splice@chr  | 4.19E-11 | 0.001016 |
| 24Mar2011 | 1171 | 510.3   | 12.8833  | 2 R.RHVAYVF chr1@1479    | 1.38E-10 | 0.002911 |
| 24Mar2011 | 5281 | 1187.91 | -26.8667 | 3 K.NQPIHVF Splice@chr   | 1.67E-10 | 0.003589 |
| 24Mar2011 | 3742 | 509.8   | -23.773  | 2 R.SSVIMLIV chr2@5767   | 9.53E-11 | 0.002441 |
| 24Mar2011 | 9549 | 1147.24 | 4.705638 | 3 R.FQSAAIG Splice@chr   | 3.15E-15 | 0        |
| 24Mar2011 | 8924 | 1192.55 | -27.8353 | 1 R.TRAYSGN Splice@chr   | 7.80E-11 | 0.001753 |
| 24Mar2011 | 1346 | 741.38  | -23.1647 | 2 K.FPENRHL\ chr2@1477   | 1.51E-10 | 0.003135 |
| 24Mar2011 | 3860 | 831.39  | -27.5413 | 2 K.KFTFEIEE chrX@1364   | 3.52E-11 | 0.001016 |
| 24Mar2011 | 2622 | 1025.61 | -11.6755 | 1 K.LGLGSGL chr5@4949    | 1.09E-10 | 0.002441 |
| 24Mar2011 | 2085 | 741.39  | -17.2291 | 2 K.QKSNWH chr5@1229     | 8.04E-11 | 0.00447  |
| 24Mar2011 | 4819 | 1017.59 | -22.5744 | 1 R.SSVIMLIV chr2@5767   | 1.96E-10 | 0.009741 |
| 24Mar2011 | 1979 | 741.39  | -17.2291 | 2 K.QKSNWH chr5@1229     | 6.56E-12 | 3.52E-04 |

|           |       |         |          |                          |          |          |
|-----------|-------|---------|----------|--------------------------|----------|----------|
| 24Mar2011 | 6845  | 833.41  | -5.13266 | 2 _ .IDM+15.5 chrX@3237  | 7.90E-11 | 0.00447  |
| 24Mar2011 | 3020  | 434.24  | 13.9946  | 3 _ .RSNDQTI chr5@6378   | 2.63E-11 | 0.00102  |
| 24Mar2011 | 2229  | 936.48  | 27.86052 | 1 K.LNGGYEC chr2@1191    | 1.08E-10 | 0.006295 |
| 24Mar2011 | 9368  | 742.88  | -6.21424 | 2 K.M+15.99 chr4@1648    | 1.20E-10 | 0.006577 |
| 24Mar2011 | 11268 | 860.68  | 2.433027 | 4 R.FQSAAIG Splice@chr   | 5.71E-11 | 0.002299 |
| 24Mar2011 | 8315  | 1182.56 | -21.0399 | 1 R.RFAENQI chr5@1779    | 1.80E-10 | 0.009172 |
| 24Mar2011 | 2048  | 741.39  | -17.2291 | 2 K.QKSNWH chr5@1229     | 1.91E-11 | 3.52E-04 |
| 24Mar2011 | 342   | 452.23  | -1.48793 | 2 R.SGEPLSA: Splice@chr  | 7.33E-11 | 0.004192 |
| 24Mar2011 | 4957  | 1017.59 | -22.5744 | 1 R.SSVIMLIV chr2@5767   | 6.88E-11 | 0.003253 |
| 24Mar2011 | 361   | 452.23  | -1.48793 | 2 R.SGEPLSA: Splice@chr  | 7.09E-11 | 0.003896 |
| 24Mar2011 | 379   | 452.23  | -1.48793 | 2 R.SGEPLSA: Splice@chr  | 7.94E-11 | 0.00447  |
| 24Mar2011 | 838   | 401.74  | -8.14847 | 2 R.AIGLVSSF chr2@1017   | 1.99E-10 | 0.009741 |
| 24Mar2011 | 8505  | 983.97  | 4.629411 | 2 R.SFSTIPDS chr2@1309   | 2.43E-14 | 0        |
| 24Mar2011 | 8937  | 974.02  | -8.56562 | 2 E.LMENQV chr1@3654     | 1.56E-10 | 0.008328 |
| 24Mar2011 | 10845 | 968.13  | 18.26018 | 3 _ .GCSIVPIS Splice@chr | 8.63E-11 | 0.00447  |
| 24Mar2011 | 10591 | 634.84  | 6.410455 | 2 R.VDIGDILF Splice@chr  | 4.13E-13 | 0        |
| 24Mar2011 | 871   | 452.23  | -1.48793 | 2 R.SGEPLSA: Splice@chr  | 3.66E-11 | 0.001349 |
| 24Mar2011 | 10107 | 1003.18 | 7.145987 | 3 R.CWNRRA Splice@chr    | 2.97E-11 | 0.00102  |
| 24Mar2011 | 4811  | 509.8   | -23.773  | 2 R.SSVIMLIV chr2@5767   | 3.76E-11 | 0.001349 |
| 24Mar2011 | 995   | 452.23  | -1.48793 | 2 R.SGEPLSA: Splice@chr  | 7.62E-11 | 0.004192 |
| 24Mar2011 | 2011  | 741.39  | -17.2291 | 2 K.QKSNWH chr5@1229     | 2.93E-11 | 0.00102  |
| 24Mar2011 | 4132  | 476.73  | -8.21113 | 2 R.SSHEISHF chr5@1494   | 1.35E-10 | 0.007446 |
| 24Mar2011 | 11276 | 1147.24 | 4.705638 | 3 R.FQSAAIG Splice@chr   | 9.56E-15 | 0        |
| 24Mar2011 | 4898  | 509.3   | -20.473  | 2 R.SSVIMLIV chr2@5767   | 5.12E-11 | 0.001994 |
| 24Mar2011 | 4947  | 509.3   | -20.473  | 2 R.SSVIMLIV chr2@5767   | 1.01E-10 | 0.005675 |
| 24Mar2011 | 10566 | 634.84  | 6.410455 | 2 R.VDIGDILF Splice@chr  | 9.68E-13 | 0        |
| 24Mar2011 | 4297  | 822.47  | -23.826  | 2 K.KVLLVST( chr1@1119   | 1.33E-10 | 0.007446 |
| 24Mar2011 | 4853  | 509.3   | -20.473  | 2 R.SSVIMLIV chr2@5767   | 8.83E-11 | 0.004782 |
| 24Mar2011 | 4988  | 509.3   | -20.473  | 2 R.SSVIMLIV chr2@5767   | 3.76E-11 | 0.001349 |
| 24Mar2011 | 4326  | 476.73  | -8.21113 | 2 R.SSHEISHF chr5@1494   | 1.20E-10 | 0.006577 |
| 24Mar2011 | 4378  | 822.47  | -23.826  | 2 K.KVLLVST( chr1@1119   | 4.26E-11 | 0.002852 |
| 24Mar2011 | 545   | 452.23  | -1.48793 | 2 R.SGEPLSA: Splice@chr  | 7.45E-11 | 0.005106 |
| 24Mar2011 | 762   | 452.23  | -1.48793 | 2 R.SGEPLSA: Splice@chr  | 5.52E-11 | 0.003978 |
| 24Mar2011 | 2385  | 936.48  | 27.86052 | 1 K.LNGGYEC chr2@1191    | 4.01E-11 | 0.001634 |
| 24Mar2011 | 4922  | 509.8   | -23.773  | 2 R.SSVIMLIV chr2@5767   | 3.76E-11 | 0.001634 |
| 24Mar2011 | 475   | 452.23  | -1.48793 | 2 R.SGEPLSA: Splice@chr  | 2.88E-11 | 4.15E-04 |
| 24Mar2011 | 10331 | 634.84  | 6.410455 | 2 R.VDIGDILF Splice@chr  | 3.96E-12 | 0        |
| 24Mar2011 | 8085  | 584.69  | -9.76929 | 5 _ .TVFYGDL chr4@5567   | 5.49E-11 | 0.003978 |
| 24Mar2011 | 2150  | 741.39  | -17.2291 | 2 K.QKSNWH chr5@1229     | 6.24E-11 | 0.004351 |
| 24Mar2011 | 510   | 452.23  | -1.48793 | 2 R.SGEPLSA: Splice@chr  | 6.55E-11 | 0.004351 |
| 24Mar2011 | 967   | 452.23  | -1.48793 | 2 R.SGEPLSA: Splice@chr  | 4.84E-11 | 0.003978 |
| 24Mar2011 | 10987 | 1147.25 | 13.44098 | 3 R.FQSAAIG Splice@chr   | 3.60E-13 | 0        |
| 24Mar2011 | 2341  | 936.48  | 27.86052 | 1 K.LNGGYEC chr2@1191    | 1.11E-10 | 0.007302 |
| 24Mar2011 | 8109  | 1182.56 | -21.0399 | 1 R.RFAENQI chr5@1779    | 1.05E-10 | 0.006178 |
| 24Mar2011 | 1051  | 452.23  | -1.48793 | 2 R.SGEPLSA: Splice@chr  | 1.00E-10 | 0.006178 |
| 24Mar2011 | 5036  | 509.3   | -20.473  | 2 R.SSVIMLIV chr2@5767   | 4.62E-11 | 0.003978 |
| 24Mar2011 | 4958  | 509.3   | -20.473  | 2 R.SSVIMLIV chr2@5767   | 3.76E-11 | 0.001634 |

|           |       |         |          |                         |          |          |
|-----------|-------|---------|----------|-------------------------|----------|----------|
| 24Mar2011 | 2188  | 741.39  | -17.2291 | 2 K.QKSNWH chr5@1229    | 1.74E-11 | 4.15E-04 |
| 24Mar2011 | 5083  | 509.3   | -20.473  | 2 R.SSVIMLIV chr2@5767  | 1.15E-10 | 0.007302 |
| 24Mar2011 | 4994  | 509.3   | -20.473  | 2 R.SSVIMLIV chr2@5767  | 3.26E-11 | 8.30E-04 |
| 24Mar2011 | 8141  | 965.76  | 6.091444 | 4 R.KTSSCQK chr5@2085   | 1.14E-10 | 0.007302 |
| 24Mar2011 | 10352 | 634.83  | -9.39461 | 2 R.VDIGDILF Splice@chr | 1.16E-13 | 0        |
| 24Mar2011 | 11289 | 809.02  | 4.909957 | 2 R.FTTELLLL chr3@8986  | 7.14E-11 | 0.005106 |
| 24Mar2011 | 8406  | 785.42  | 22.95449 | 1 _..MPAWAF chr2@1115   | 8.72E-11 | 0.005825 |
| 24Mar2011 | 4959  | 1017.59 | -22.5744 | 1 R.SSVIMLIV chr2@5767  | 1.88E-11 | 4.15E-04 |
| 24Mar2011 | 8330  | 983.47  | 6.336758 | 2 R.SFSTIPDS chr2@1305  | 1.46E-18 | 0        |
| 24Mar2011 | 4585  | 476.73  | -8.21113 | 2 R.SSHEISHF chr5@1494  | 1.75E-10 | 0.006289 |
| 24Mar2011 | 3904  | 529.6   | -12.9775 | 3 _..AFHESKL chrX@3409  | 1.11E-10 | 0.005238 |
| 24Mar2011 | 996   | 452.23  | -1.48793 | 2 R.SGEPLSA: Splice@chr | 5.53E-11 | 0.002931 |
| 24Mar2011 | 7730  | 801.71  | 5.720343 | 3 K.FFKPNTD chr5@7527   | 6.14E-16 | 0        |
| 24Mar2011 | 1021  | 452.23  | -1.48793 | 2 R.SGEPLSA: Splice@chr | 3.68E-11 | 0.002545 |
| 24Mar2011 | 1047  | 452.23  | -1.48793 | 2 R.SGEPLSA: Splice@chr | 8.67E-11 | 0.004479 |
| 24Mar2011 | 7694  | 801.37  | -1.32183 | 3 K.FFKPNTD chr5@7527   | 3.88E-15 | 0        |
| 24Mar2011 | 2616  | 936.48  | 27.86052 | 1 K.LNGGYEC chr2@1191   | 3.26E-11 | 0.002165 |
| 24Mar2011 | 1239  | 452.23  | -1.48793 | 2 R.SGEPLSA: Splice@chr | 1.65E-10 | 0.005915 |
| 24Mar2011 | 729   | 452.23  | -1.48793 | 2 R.SGEPLSA: Splice@chr | 1.29E-10 | 0.005611 |
| 24Mar2011 | 10262 | 828.87  | -1.01339 | 4 S.EDLGSDA Splice@chr  | 5.29E-15 | 0        |
| 24Mar2011 | 2376  | 741.39  | -17.2291 | 2 K.QKSNWH chr5@1229    | 1.76E-11 | 8.92E-04 |
| 24Mar2011 | 5397  | 509.8   | -23.773  | 2 R.SSVIMLIV chr2@5767  | 3.76E-11 | 0.002545 |
| 24Mar2011 | 11611 | 1147.25 | 13.44098 | 3 R.FQSAAIG Splice@chr  | 4.95E-13 | 0        |
| 24Mar2011 | 2642  | 979.49  | 11.24178 | 1 _..NLQNGN chr2@1080   | 5.96E-11 | 0.002931 |
| 24Mar2011 | 5493  | 509.3   | -20.473  | 2 R.SSVIMLIV chr2@5767  | 9.34E-11 | 0.004479 |
| 24Mar2011 | 2444  | 741.39  | -17.2291 | 2 K.QKSNWH chr5@1229    | 1.44E-10 | 0.005915 |
| 24Mar2011 | 6763  | 748.73  | -12.625  | 3 R.LPSKENL chr4@5639   | 1.22E-10 | 0.005238 |
| 24Mar2011 | 8812  | 983.97  | 4.629411 | 2 R.SFSTIPDS chr2@1305  | 1.85E-19 | 0        |
| 24Mar2011 | 5298  | 509.8   | -23.773  | 2 R.SSVIMLIV chr2@5767  | 3.76E-11 | 0.002545 |
| 24Mar2011 | 6815  | 748.73  | -12.625  | 3 R.LPSKENL chr4@5639   | 1.82E-10 | 0.006667 |
| 24Mar2011 | 7626  | 945.45  | -23.4585 | 2 K.FSKKNMI chr4@1701   | 2.01E-10 | 0.008577 |
| 24Mar2011 | 3948  | 529.6   | -12.9775 | 3 _..AFHESKL chrX@3409  | 1.47E-10 | 0.005915 |
| 24Mar2011 | 2701  | 519.6   | -26.5197 | 3 K.IGSM+15 chr5@1654   | 7.15E-11 | 0.00331  |
| 24Mar2011 | 3750  | 570.33  | 10.24926 | 2 K.QIHHSLYI Splice@chr | 2.07E-10 | 0.009724 |
| 24Mar2011 | 10568 | 1162.13 | 17.06615 | 2 K.YLGAYLL Splice@chr  | 1.70E-16 | 0        |
| 24Mar2011 | 1194  | 452.23  | -1.48793 | 2 R.SGEPLSA: Splice@chr | 4.77E-11 | 0.002545 |
| 24Mar2011 | 10873 | 634.84  | 6.410455 | 2 R.VDIGDILF Splice@chr | 8.59E-13 | 0        |
| 24Mar2011 | 5440  | 509.3   | -20.473  | 2 R.SSVIMLIV chr2@5767  | 1.88E-11 | 8.92E-04 |
| 24Mar2011 | 9003  | 599.78  | 26.60544 | 2 _..M+15.99 chr2@8892  | 1.56E-10 | 0.005915 |
| 24Mar2011 | 9297  | 1109.26 | -7.32627 | 3 F.PETHVLA chr5@6493   | 1.53E-10 | 0.005915 |
| 24Mar2011 | 10846 | 634.84  | 6.410455 | 2 R.VDIGDILF Splice@chr | 1.48E-12 | 0        |
| 24Mar2011 | 5347  | 509.8   | -23.773  | 2 R.SSVIMLIV chr2@5767  | 2.07E-10 | 0.009724 |
| 24Mar2011 | 973   | 452.23  | -1.48793 | 2 R.SGEPLSA: Splice@chr | 7.84E-11 | 0.003707 |
| 24Mar2011 | 7546  | 945.95  | -25.2346 | 2 K.FSKKNMI chr4@1701   | 1.89E-10 | 0.007825 |
| 24Mar2011 | 2409  | 741.39  | -17.2291 | 2 K.QKSNWH chr5@1229    | 4.82E-11 | 0.002545 |
| 24Mar2011 | 7587  | 945.95  | -25.2346 | 2 K.FSKKNMI chr4@1701   | 3.24E-11 | 0.002165 |
| 24Mar2011 | 6459  | 671.37  | -24.0361 | 2 T.FNIVHTQ Splice@chr  | 4.51E-10 | 0.008273 |

|           |       |         |          |                          |          |          |
|-----------|-------|---------|----------|--------------------------|----------|----------|
| 24Mar2011 | 7062  | 833.42  | -19.2103 | 2 _..IIEPYVAV Splice@chr | 8.62E-11 | 0.001298 |
| 24Mar2011 | 7864  | 722.45  | -4.95112 | 2 R.RK+14.01 Splice@chr  | 4.45E-10 | 0.008273 |
| 24Mar2011 | 3208  | 1025.61 | -11.6755 | 1 K.LGLGSL chr5@4945     | 2.27E-11 | 4.65E-04 |
| 24Mar2011 | 7043  | 622.33  | 9.587405 | 2 R.AK+14.01 chr2@4270   | 4.82E-10 | 0.008824 |
| 24Mar2011 | 882   | 510.3   | 12.8833  | 2 R.RHVAYVF chr1@1479    | 6.40E-11 | 8.78E-04 |
| 24Mar2011 | 5909  | 671.37  | -24.0361 | 2 T.FNIVHTQ Splice@chr   | 1.04E-10 | 0.002125 |
| 24Mar2011 | 9790  | 1147.24 | 4.705638 | 3 R.FQSAAIG Splice@chr   | 4.92E-13 | 0        |
| 24Mar2011 | 1755  | 741.38  | -23.1647 | 2 K.FPENRHL chr2@1477    | 4.13E-10 | 0.007337 |
| 24Mar2011 | 5708  | 671.37  | -24.0361 | 2 T.FNIVHTQ Splice@chr   | 3.02E-10 | 0.005841 |
| 24Mar2011 | 8603  | 665.37  | -26.6417 | 2 Q.INNK+14 Splice@chr   | 4.97E-10 | 0.00899  |
| 24Mar2011 | 7331  | 1005.47 | -16.3827 | 2 K.KVELALW Splice@chr   | 7.13E-23 | 0        |
| 24Mar2011 | 6596  | 833.93  | -9.2006  | 2 _..IIEPYVAV Splice@chr | 3.97E-10 | 0.007337 |
| 24Mar2011 | 7457  | 785.42  | 22.95449 | 1 _..MPAWAF chr2@1115    | 2.85E-11 | 6.77E-04 |
| 24Mar2011 | 4780  | 825.96  | -15.1379 | 2 R.SARENKT Splice@chr   | 3.45E-10 | 0.006987 |
| 24Mar2011 | 1795  | 741.38  | -23.1647 | 2 K.FPENRHL chr2@1477    | 1.67E-10 | 0.003104 |
| 24Mar2011 | 10477 | 1021.48 | -21.9097 | 1 K.RWMWV chr1@2685      | 2.85E-11 | 6.77E-04 |
| 24Mar2011 | 6639  | 648.87  | 2.405882 | 2 R.QM+15.9 chr3@9694    | 1.51E-10 | 0.002709 |
| 24Mar2011 | 5454  | 706.34  | 8.098268 | 2 M.PSMEEV chr5@4890     | 1.42E-14 | 0        |
| 24Mar2011 | 3447  | 665.88  | -25.2158 | 2 _..ILYYFLKIE chr3@2365 | 4.60E-10 | 0.008453 |
| 24Mar2011 | 856   | 510.3   | 12.8833  | 2 R.RHVAYVF chr1@1479    | 1.21E-10 | 0.002322 |
| 24Mar2011 | 1828  | 741.38  | -23.1647 | 2 K.FPENRHL chr2@1477    | 3.53E-10 | 0.006987 |
| 24Mar2011 | 1274  | 510.3   | 12.8833  | 2 R.RHVAYVF chr1@1479    | 6.54E-12 | 0        |
| 24Mar2011 | 1719  | 741.38  | -23.1647 | 2 K.FPENRHL chr2@1477    | 3.67E-10 | 0.007174 |
| 24Mar2011 | 2216  | 566.81  | 0.647242 | 2 I.RIPLDYAE chr5@2047   | 8.16E-11 | 0.001298 |
| 24Mar2011 | 910   | 510.3   | 12.8833  | 2 R.RHVAYVF chr1@1479    | 6.40E-11 | 8.78E-04 |
| 24Mar2011 | 2846  | 533.82  | 16.26677 | 2 K.TNIYTILTI chr5@1329  | 5.46E-10 | 0.009542 |
| 24Mar2011 | 4881  | 1075.05 | -16.1169 | 2 R.TCSK+14. chr2@1253   | 1.08E-10 | 0.002125 |
| 24Mar2011 | 6011  | 671.87  | -26.5383 | 2 T.FNIVHTQ Splice@chr   | 1.24E-10 | 0.002322 |
| 24Mar2011 | 1474  | 510.3   | 12.8833  | 2 R.RHVAYVF chr1@1479    | 6.67E-11 | 0.001094 |
| 24Mar2011 | 1434  | 837.45  | -19.6495 | 1 K.TYIVGQR chr4@5607    | 5.37E-10 | 0.009371 |
| 24Mar2011 | 8712  | 1003.18 | 7.145987 | 3 R.CWNRRA Splice@chr    | 1.99E-12 | 0        |
| 24Mar2011 | 2800  | 870.51  | 4.219085 | 1 K.IQKMPPF chrX@1229    | 6.01E-10 | 0.00922  |
| 24Mar2011 | 8780  | 634.84  | 6.410455 | 2 R.VDIGDILF Splice@chr  | 3.97E-13 | 0        |
| 24Mar2011 | 7539  | 611     | 13.71695 | 3 _..WFMEKT chr5@1462    | 5.04E-10 | 0.008768 |
| 24Mar2011 | 5071  | 621.83  | 6.390414 | 2 K.EREREKEI chrX@1638   | 1.82E-10 | 0.003704 |
| 24Mar2011 | 7577  | 611     | 13.71695 | 3 _..WFMEKT chr5@1462    | 6.23E-10 | 0.009427 |
| 24Mar2011 | 1817  | 741.39  | -17.2291 | 2 K.QKSNWH chr5@1229     | 1.67E-11 | 6.04E-04 |
| 24Mar2011 | 1785  | 741.39  | -17.2291 | 2 K.QKSNWH chr5@1229     | 7.35E-11 | 0.001688 |
| 24Mar2011 | 1752  | 741.39  | -17.2291 | 2 K.QKSNWH chr5@1229     | 5.47E-11 | 0.001428 |
| 24Mar2011 | 4795  | 1075.06 | -6.79295 | 2 R.TCSK+14. chr2@1253   | 4.77E-10 | 0.008323 |
| 24Mar2011 | 2816  | 533.82  | 16.26677 | 2 K.TNIYTILTI chr5@1329  | 4.48E-10 | 0.008107 |
| 24Mar2011 | 9282  | 1147.25 | 13.44098 | 3 R.FQSAAIG Splice@chr   | 1.13E-17 | 0        |
| 24Mar2011 | 5586  | 1187.91 | -26.8667 | 3 K.NQPIHVF Splice@chr   | 1.23E-10 | 0.002433 |
| 24Mar2011 | 341   | 437.26  | 8.81428  | 2 K.KLEDGLA chrX@7918    | 4.77E-10 | 0.008323 |
| 24Mar2011 | 6787  | 622.33  | 9.587405 | 2 R.AK+14.01 chr2@4270   | 6.15E-10 | 0.009427 |
| 24Mar2011 | 4652  | 825.96  | -15.1379 | 2 R.SARENKT Splice@chr   | 7.59E-11 | 0.001688 |
| 24Mar2011 | 8757  | 634.84  | 6.410455 | 2 R.VDIGDILF Splice@chr  | 2.63E-13 | 0        |

|           |       |         |          |                         |          |          |
|-----------|-------|---------|----------|-------------------------|----------|----------|
| 24Mar2011 | 6833  | 1153.23 | -17.5731 | 3 F.EGIRTGG Splice@chr  | 1.93E-11 | 6.04E-04 |
| 24Mar2011 | 8726  | 430.89  | 24.70532 | 3 K.K+14.016 chr1@125   | 6.40E-10 | 0.009894 |
| 24Mar2011 | 2671  | 434.24  | 13.9946  | 3 _RSNDQTI chr5@637     | 1.78E-10 | 0.003704 |
| 24Mar2011 | 1847  | 741.39  | -17.2291 | 2 K.QKSNWH chr5@122     | 3.63E-11 | 0.00117  |
| 24Mar2011 | 766   | 401.74  | -8.14847 | 2 R.AIGLVSSF chr2@101   | 1.99E-10 | 0.003704 |
| 24Mar2011 | 4758  | 1075.06 | -6.79295 | 2 R.TCSK+14. chr2@125   | 3.85E-10 | 0.007916 |
| 24Mar2011 | 5182  | 711.88  | -29.4253 | 2 K.TIGFGGQ Splice@chr  | 4.08E-11 | 0.001999 |
| 24Mar2011 | 13066 | 833.42  | -19.2103 | 2 _IIEPYVAV Splice@chr  | 1.26E-10 | 0.004934 |
| 24Mar2011 | 14906 | 1022.99 | 17.00069 | 2 R.QSRRTFD chr1@116    | 2.07E-10 | 0.006128 |
| 24Mar2011 | 12811 | 753.95  | -13.1319 | 2 K.K+14.016 chr2@137   | 1.58E-11 | 8.60E-04 |
| 24Mar2011 | 17826 | 1147.24 | 4.705638 | 3 R.FQSAAIG Splice@chr  | 8.89E-13 | 1.73E-04 |
| 24Mar2011 | 6806  | 1025.61 | -11.6755 | 1 K.LGLGSGL chr5@494    | 1.35E-11 | 7.25E-04 |
| 24Mar2011 | 10859 | 748.72  | -26.0118 | 3 R.LPSKENL chr4@563    | 5.46E-11 | 0.002474 |
| 24Mar2011 | 12327 | 833.93  | -9.2006  | 2 _IIEPYVAV Splice@chr  | 2.28E-10 | 0.006588 |
| 24Mar2011 | 13446 | 1056.56 | 28.0642  | 3 I.SRVEDDS Splice@chr  | 5.07E-13 | 1.73E-04 |
| 24Mar2011 | 16714 | 634.83  | -9.39461 | 2 R.VDIGDILF Splice@chr | 5.76E-13 | 1.73E-04 |
| 24Mar2011 | 8678  | 509.3   | -20.473  | 2 R.SSVIMLIV chr2@576   | 1.30E-10 | 0.004934 |
| 24Mar2011 | 1968  | 510.3   | 12.8833  | 2 R.RHVAYVF chr1@147    | 6.54E-12 | 4.62E-04 |
| 24Mar2011 | 2078  | 510.3   | 12.8833  | 2 R.RHVAYVF chr1@147    | 6.54E-12 | 4.62E-04 |
| 24Mar2011 | 1374  | 562.31  | -13.4391 | 2 R.FYLLYLYK Splice@chr | 8.14E-11 | 0.003315 |
| 24Mar2011 | 6444  | 460.25  | -17.4268 | 2 K.YPGIGGI Splice@chr  | 6.67E-11 | 0.002715 |
| 24Mar2011 | 2135  | 510.3   | 12.8833  | 2 R.RHVAYVF chr1@147    | 1.21E-10 | 0.004857 |
| 24Mar2011 | 12273 | 833.93  | -9.2006  | 2 _IIEPYVAV Splice@chr  | 6.89E-11 | 0.002715 |
| 24Mar2011 | 1844  | 858.49  | -10.5443 | 1 _TVASRAP chrX@706     | 1.29E-10 | 0.004934 |
| 24Mar2011 | 4612  | 936.48  | 27.86052 | 1 K.LNGGYEC chr2@119    | 5.32E-11 | 0.002474 |
| 24Mar2011 | 9354  | 825.96  | -15.1379 | 2 R.SARENKT Splice@chr  | 1.02E-10 | 0.004034 |
| 24Mar2011 | 12633 | 762.43  | 16.40509 | 2 _MK+14.0 chr4@774     | 3.32E-10 | 0.008906 |
| 24Mar2011 | 1424  | 562.33  | 22.25853 | 2 R.FYLLYLYK Splice@chr | 4.72E-11 | 0.002124 |
| 24Mar2011 | 16276 | 753.76  | 24.32539 | 3 _TLLEALDS Splice@chr  | 1.29E-10 | 0.004934 |
| 24Mar2011 | 4710  | 489.28  | 28.87637 | 2 R.RGTASRS chr5@195    | 8.71E-11 | 0.003315 |
| 24Mar2011 | 15312 | 1067.09 | 27.52422 | 2 K.QK+14.0 chr1@491    | 2.46E-10 | 0.007014 |
| 24Mar2011 | 4061  | 491.26  | -25.7288 | 3 K.IIQYSEVR chr5@963   | 1.95E-10 | 0.006037 |
| 24Mar2011 | 2021  | 510.3   | 12.8833  | 2 R.RHVAYVF chr1@147    | 6.40E-11 | 0.002597 |
| 24Mar2011 | 11346 | 1075.05 | -16.1169 | 2 R.TCSK+14. chr2@125   | 3.28E-10 | 0.008796 |
| 24Mar2011 | 264   | 420.68  | -22.1784 | 2 R.MMTGT chrX@953      | 3.32E-10 | 0.008906 |
| 24Mar2011 | 4259  | 741.39  | -17.2291 | 2 K.QKSNWH chr5@122     | 4.84E-11 | 0.002252 |
| 24Mar2011 | 8694  | 1017.59 | -22.5744 | 1 R.SSVIMLIV chr2@576   | 1.38E-10 | 0.004934 |
| 24Mar2011 | 4367  | 741.38  | -23.1647 | 2 K.FPENRHI chr2@147    | 3.36E-10 | 0.009013 |
| 24Mar2011 | 12473 | 858.47  | -5.67211 | 3 _LETGIKPI Splice@chr  | 2.45E-11 | 0.001248 |
| 24Mar2011 | 4665  | 936.48  | 27.86052 | 1 K.LNGGYEC chr2@119    | 2.25E-11 | 9.85E-04 |
| 24Mar2011 | 1285  | 562.33  | 22.25853 | 2 R.FYLLYLYK Splice@chr | 3.04E-10 | 0.00824  |
| 24Mar2011 | 1389  | 517.29  | -7.09318 | 2 _FRVEVVE Splice@chr   | 1.82E-10 | 0.005829 |
| 24Mar2011 | 9524  | 1075.05 | -16.1169 | 2 R.TCSK+14. chr2@125   | 2.32E-10 | 0.00669  |
| 24Mar2011 | 12858 | 753.96  | 0.162122 | 2 K.K+14.016 chr2@137   | 2.93E-10 | 0.008026 |
| 24Mar2011 | 14707 | 902.46  | -21.5757 | 3 K.RKLEYTIS Splice@chr | 3.17E-10 | 0.008463 |
| 24Mar2011 | 13533 | 1005.47 | -16.3827 | 2 K.KVELALW Splice@chr  | 4.96E-19 | 0        |
| 24Mar2011 | 13702 | 785.42  | 22.95449 | 1 _MPAWAF chr2@111      | 2.17E-11 | 9.85E-04 |

|            |       |         |          |                          |          |          |
|------------|-------|---------|----------|--------------------------|----------|----------|
| 24Mar2011  | 13760 | 785.42  | 22.95449 | 1 _..MPAWAF chr2@1115    | 2.29E-11 | 0.001121 |
| 24Mar2011  | 1970  | 741.39  | -17.2291 | 2 K.QKSNWH chr5@1229     | 1.81E-11 | 2.69E-04 |
| 24Mar2011  | 6612  | 762.43  | 16.40509 | 2 _..MK+14.0 chr4@7749   | 5.72E-10 | 0.008937 |
| 24Mar2011  | 5049  | 873.45  | 11.16623 | 2 S.IM+15.99 Splice@chr  | 3.15E-10 | 0.004952 |
| 24Mar2011  | 5169  | 657.04  | -26.9179 | 3 R.GNVRK+1 chrX@7490    | 3.05E-11 | 2.69E-04 |
| 24Mar2011  | 5898  | 1075.06 | -6.79295 | 2 R.TCSK+14. chr2@1253   | 2.29E-10 | 0.003109 |
| 24Mar2011  | 2873  | 434.24  | 13.9946  | 3 _..RSNDQTI chr5@6378   | 3.68E-10 | 0.005634 |
| 24Mar2011  | 1859  | 741.39  | -17.2291 | 2 K.QKSNWH chr5@1229     | 1.45E-10 | 0.002438 |
| 24Mar2011  | 8032  | 837.43  | -14.0104 | 2 R.GLQVDV chr2@1393     | 4.66E-10 | 0.006967 |
| 24Mar2011  | 6897  | 622.33  | 9.587405 | 2 R.AK+14.01 chr2@4270   | 6.22E-10 | 0.009363 |
| 24Mar2011  | 7850  | 742.88  | -6.21424 | 2 K.M+15.99 chr4@1648    | 2.52E-10 | 0.003109 |
| 24Mar2011  | 778   | 562.31  | -13.4391 | 2 R.FYLLYLYK Splice@chr  | 5.58E-11 | 5.20E-04 |
| 24Mar2011  | 4921  | 1075.06 | -6.79295 | 2 R.TCSK+14. chr2@1253   | 1.63E-10 | 0.002438 |
| 24Mar2011  | 5989  | 671.37  | -24.0361 | 2 T.FNIVHTQ Splice@chr   | 4.87E-10 | 0.007387 |
| 24Mar2011  | 3314  | 1025.62 | -1.90621 | 1 K.LGLGSGL chr5@4945    | 4.78E-11 | 5.20E-04 |
| 24Mar2011  | 1926  | 741.39  | -17.2291 | 2 K.QKSNWH chr5@1229     | 2.91E-10 | 0.004032 |
| 24Mar2011  | 8419  | 1003.19 | 17.13413 | 3 R.CWNRRA Splice@chr    | 3.89E-12 | 0        |
| 24Mar2011  | 9446  | 1147.25 | 13.44098 | 3 R.FQSAAIG Splice@chr   | 5.32E-15 | 0        |
| 24Mar2011  | 6458  | 833.94  | 2.824179 | 2 _..IIEPYVAV Splice@chr | 2.63E-10 | 0.003343 |
| 24Mar2011  | 4778  | 825.96  | -15.1379 | 2 R.SARENKT Splice@chr   | 7.10E-11 | 7.71E-04 |
| 24Mar2011  | 9420  | 1116.22 | 16.71106 | 3 K.QAFDDAI Splice@chr   | 4.14E-10 | 0.006078 |
| 24Mar2011  | 6211  | 671.37  | -24.0361 | 2 T.FNIVHTQ Splice@chr   | 4.27E-10 | 0.006528 |
| 24Mar2011  | 8398  | 1003.19 | 17.13413 | 3 R.CWNRRA Splice@chr    | 1.94E-10 | 0.002672 |
| 24Mar2011  | 4674  | 663.85  | -5.06443 | 2 N.KMIFSMI chr4@8622    | 5.97E-10 | 0.008937 |
| 24Mar2011  | 7239  | 785.42  | 22.95449 | 1 _..MPAWAF chr2@1115    | 2.73E-11 | 2.69E-04 |
| 24Mar2011  | 1891  | 741.39  | -9.64508 | 2 K.FPENRHI chr2@1477    | 1.29E-10 | 0.002438 |
| 26July2011 | 5609  | 773.36  | -26.9468 | 2 R.SRICYWY chr3@9781    | 9.25E-11 | 0.008627 |
| 26July2011 | 1977  | 509.3   | -20.473  | 2 R.SSVIMLIV chr2@5767   | 1.88E-11 | 9.09E-04 |
| 26July2011 | 2021  | 509.3   | -20.473  | 2 R.SSVIMLIV chr2@5767   | 1.88E-11 | 9.09E-04 |
| 26July2011 | 912   | 793.91  | -25.0169 | 2 _..FKKK+14. chr2@1162  | 5.21E-11 | 0.004184 |
| 26July2011 | 1010  | 762.4   | -17.8492 | 3 R.HILRQNA chr3@3082    | 2.38E-11 | 0.005682 |
| 26July2011 | 2833  | 555.97  | 19.65028 | 3 K.M+15.99 chr5@1600    | 2.12E-10 | 0.008535 |
| 26July2011 | 1016  | 472.29  | -0.64754 | 2 _..SPLFVPKf chrX@4402  | 1.30E-10 | 0.002941 |
| 26July2011 | 5270  | 984.01  | 14.83986 | 2 R.NWNTLIC chr3@8316    | 1.91E-10 | 0.005747 |
| 26July2011 | 2844  | 858.48  | 6.006088 | 3 _..LETGIKPI Splice@chr | 4.32E-11 | 7.78E-04 |
| 26July2011 | 2609  | 994.84  | -20.7023 | 3 K.SQVFSTA chrX@6089    | 5.33E-14 | 0        |
| 26July2011 | 2755  | 734.44  | 12.7326  | 2 K.VVNLLAP chr1@9173    | 7.60E-12 | 0        |
| 26July2011 | 2805  | 733.06  | -27.8862 | 3 _..KYATFLYf chr1@1336  | 7.75E-11 | 7.78E-04 |
| 26July2011 | 369   | 513.31  | -9.53103 | 2 K.LGLGSGL chr5@4945    | 4.99E-11 | 0.003953 |
| 26July2011 | 1140  | 559.79  | 11.35993 | 2 R.DGWSIG chr4@4253     | 1.44E-10 | 0.006124 |
| 26July2011 | 547   | 454.75  | 8.810814 | 2 K.TDLAYLG chr4@1543    | 1.21E-10 | 0.005587 |
| 26July2011 | 4507  | 588.31  | -13.7179 | 3 K.NYDQCAI chrX@1180    | 2.66E-10 | 0.009855 |
| 26July2011 | 1180  | 559.79  | 11.35993 | 2 R.DGWSIG chr4@4253     | 1.13E-10 | 0.005587 |
| 26July2011 | 50    | 506.78  | 5.370163 | 2 _..VDKNVYf chr4@1192   | 1.07E-10 | 0.005587 |
| 26July2011 | 5101  | 757.93  | 7.142486 | 2 F.QVFENV chr3@8444     | 3.39E-11 | 7.16E-04 |
| 26July2011 | 4413  | 858.48  | 6.006088 | 3 _..LETGIKPI Splice@chr | 2.89E-11 | 7.16E-04 |
| 26July2011 | 3310  | 758.42  | 25.18171 | 3 R.GPSWIIN chr5@8323    | 2.78E-11 | 0.002817 |

|            |       |        |          |                          |          |          |
|------------|-------|--------|----------|--------------------------|----------|----------|
| 26July2011 | 2204  | 905.14 | -11.7011 | 3 T.TPTTTTTI Splice@chr  | 6.07E-11 | 0.003759 |
| 26July2011 | 1497  | 858.48 | 6.006088 | 3 _..LETGIKPI Splice@chr | 2.18E-12 | 0        |
| 26July2011 | 5470  | 757.43 | 9.360043 | 2 F.QVFENV\ chr3@844     | 3.20E-11 | 0.002423 |
| 26July2011 | 5041  | 990.5  | -11.7554 | 2 F.RLSESELE chr4@751    | 1.32E-10 | 0.008481 |
| 26July2011 | 3542  | 472.29 | -0.64754 | 2 _..SPLFVPKI chrX@440   | 1.30E-10 | 0.008481 |
| 26July2011 | 1634  | 559.79 | 11.35993 | 2 R.DGWSIG chr4@425      | 7.18E-11 | 0.005185 |
| 26July2011 | 5888  | 757.43 | 9.360043 | 2 F.QVFENV\ chr3@844     | 1.91E-12 | 0        |
| 26July2011 | 1353  | 559.79 | 11.35993 | 2 R.DGWSIG chr4@425      | 1.00E-10 | 0.002556 |
| 26July2011 | 5852  | 757.43 | 9.360043 | 2 F.QVFENV\ chr3@844     | 2.09E-11 | 5.79E-04 |
| 26July2011 | 6196  | 988.05 | 18.46899 | 2 K.FDYFNMI chr4@160     | 6.40E-11 | 0.002147 |
| 26July2011 | 4769  | 687.91 | 18.98648 | 2 E.M+15.99 chr2@854     | 5.85E-11 | 0.002147 |
| 26July2011 | 3487  | 515.62 | -18.8182 | 3 K.ILKIK+14. chr2@144   | 2.13E-10 | 0.007685 |
| 26July2011 | 2883  | 767.75 | -14.8381 | 3 K.TFLKNPK chr3@104     | 5.51E-11 | 0.009836 |
| 26July2011 | 5314  | 685.88 | 4.188613 | 2 K.IVPGGGA chrX@157     | 5.37E-11 | 0.001813 |
| 26July2011 | 4705  | 508.94 | 26.99757 | 3 K.AIIACSTH chr2@126    | 4.51E-10 | 0.009236 |
| 26July2011 | 7095  | 858.15 | 11.29842 | 3 _..LETGIKPI Splice@chr | 7.31E-11 | 0.002682 |
| 26July2011 | 9448  | 593.34 | 22.02044 | 2 R.NSHTLPL chrX@907     | 4.33E-10 | 0.009019 |
| 26July2011 | 3680  | 560.82 | 28.56613 | 2 R.PDFSLNS chr3@332     | 2.64E-10 | 0.006681 |
| 26July2011 | 4336  | 452.73 | -24.0502 | 2 K.SVDLVDI chr5@850     | 2.60E-10 | 0.006681 |
| 26July2011 | 10120 | 792.16 | -5.99938 | 4 K.SGTIFDNI Splice@chr  | 1.35E-10 | 0.004832 |
| 26July2011 | 3267  | 702.36 | 19.55301 | 2 R.LQENVEK chr4@738     | 2.01E-10 | 0.005588 |
| 26July2011 | 3433  | 836.94 | 6.20627  | 2 R.IGENLST chr3@885     | 5.54E-12 | 6.22E-04 |
| 26July2011 | 1153  | 707.34 | -26.4152 | 2 K.KNNFIEY chr5@517     | 2.69E-10 | 0.006681 |
| 26July2011 | 7957  | 757.43 | 9.360043 | 2 F.QVFENV\ chr3@844     | 2.71E-11 | 0.001175 |
| 26July2011 | 8009  | 905.15 | -0.54005 | 3 T.TPTTTTTI Splice@chr  | 8.90E-13 | 0        |
| 26July2011 | 683   | 587.3  | 4.892896 | 2 Q.NAVEQE Splice@chr    | 1.07E-11 | 6.22E-04 |
| 26July2011 | 7462  | 762.4  | 0.669255 | 3 _..FYSM+15 chrX@998    | 3.61E-10 | 0.008429 |
| 26July2011 | 5449  | 472.29 | -0.64754 | 2 _..SPLFVPKI chrX@440   | 1.32E-10 | 0.004832 |
| 26July2011 | 1114  | 508.94 | 26.99757 | 3 K.AIIACSTH chr2@126    | 2.74E-11 | 0.002602 |
| 26July2011 | 1347  | 472.3  | 20.52712 | 2 _..SPLFVPKI chrX@440   | 1.30E-10 | 0.00721  |
| 26July2011 | 4127  | 767.75 | -14.8381 | 3 K.TFLKNPK chr3@104     | 1.95E-10 | 0.008517 |
| 26July2011 | 1881  | 994.84 | -20.7023 | 3 K.SQVFSTA chrX@608     | 7.16E-12 | 9.96E-04 |
| 26July2011 | 846   | 560.82 | 28.56613 | 2 R.PDFSLNS chr3@332     | 1.32E-10 | 0.00721  |
| 26July2011 | 2831  | 479.27 | -26.2887 | 3 _..AIIACSTH Splice@chr | 1.85E-11 | 5.49E-04 |
| 26July2011 | 2486  | 556.81 | -8.45565 | 4 K.RK+14.01 chr4@615    | 1.53E-10 | 0.005858 |
| 26July2011 | 4322  | 858.48 | 6.006088 | 3 _..LETGIKPI Splice@chr | 2.06E-12 | 5.49E-04 |
| 26July2011 | 7314  | 958.52 | 24.39638 | 2 S.DSGSTIIM chr2@423    | 2.51E-10 | 0.009223 |
| 26July2011 | 1996  | 508.94 | 26.99757 | 3 K.AIIACSTH chr2@126    | 1.46E-10 | 0.005858 |
| 26July2011 | 2762  | 837.44 | 4.199642 | 2 R.IGENLST chr3@885     | 4.13E-13 | 0        |
| 26July2011 | 5880  | 685.88 | 4.188613 | 2 K.IVPGGGA chrX@157     | 2.86E-16 | 0        |
| 26July2011 | 884   | 472.29 | -0.64754 | 2 _..SPLFVPKI chrX@440   | 1.30E-10 | 0.004496 |
| 26July2011 | 7479  | 757.43 | 9.360043 | 2 F.QVFENV\ chr3@844     | 1.40E-11 | 0        |
| 26July2011 | 5182  | 874.08 | 3.821679 | 3 _..ARPLYM+ chr4@303    | 2.65E-10 | 0.009091 |
| 26July2011 | 6634  | 858.49 | 17.68429 | 3 _..LETGIKPI Splice@chr | 5.28E-13 | 0        |
| 26July2011 | 417   | 533.76 | 0.976743 | 2 G.FGGGGIS chr2@508     | 1.76E-10 | 0.003351 |
| 26July2011 | 2093  | 693.87 | -6.6949  | 2 V.ICVAVGD chr5@106     | 2.80E-10 | 0.009895 |
| 26July2011 | 1176  | 433.76 | 2.609238 | 2 _..IVDLP GPI chr3@110  | 6.60E-11 | 0        |

|            |       |        |          |                           |          |          |
|------------|-------|--------|----------|---------------------------|----------|----------|
| 26July2011 | 59    | 688.3  | 6.038794 | 2 R.GGDGGA chr3@2778      | 3.33E-18 | 0        |
| 26July2011 | 706   | 508.94 | 26.99757 | 3 K.AIIACSTH chr2@1266    | 5.92E-11 | 0.007979 |
| 26July2011 | 1051  | 460.25 | 8.040761 | 2 _ .ATDGSSII chr5@1148   | 2.96E-10 | 0.009826 |
| 26July2011 | 1802  | 565.31 | 11.85615 | 2 H.FVHAFAF chr1@1061     | 9.55E-11 | 0.003374 |
| 26July2011 | 8941  | 792.16 | -5.99938 | 4 K.SGTIFDNI Splice@chr   | 5.73E-11 | 0.001781 |
| 26July2011 | 404   | 692.35 | 11.91862 | 2 K.TAEHVEC Splice@chr    | 5.56E-12 | 0        |
| 26July2011 | 6411  | 994.84 | -20.7023 | 3 K.SQVFSTA chrX@6089     | 7.49E-14 | 0        |
| 26July2011 | 7407  | 757.43 | 9.360043 | 2 F.QVFENV\ chr3@8444     | 1.70E-11 | 0.001435 |
| 26July2011 | 8566  | 593.34 | 22.02044 | 2 R.NSHTLPL chrX@9076     | 5.53E-11 | 0.001781 |
| 26July2011 | 3700  | 509.3  | -20.473  | 2 R.SSVIMLIV chr2@5767    | 3.76E-11 | 0.001781 |
| 26July2011 | 3747  | 509.3  | -20.473  | 2 R.SSVIMLIV chr2@5767    | 3.76E-11 | 0.001781 |
| 26July2011 | 8349  | 768.47 | 28.88322 | 3 K.IVEIPLNQ Splice@chr   | 2.58E-10 | 0.008006 |
| 26July2011 | 4689  | 897.09 | -22.7039 | 3 _ .QVREMH Splice@chr    | 1.15E-10 | 0.004149 |
| 26July2011 | 632   | 417.22 | -11.0053 | 3 K.KGGSSSA chr5@8375     | 8.92E-11 | 0.005355 |
| 26July2011 | 2459  | 509.3  | -20.473  | 2 R.SSVIMLIV chr2@5767    | 3.76E-11 | 0.001433 |
| 26July2011 | 2425  | 509.3  | -20.473  | 2 R.SSVIMLIV chr2@5767    | 1.88E-11 | 0.001433 |
| 26July2011 | 290   | 583.83 | -11.3703 | 2 R.LVFPITFS chr1@2422    | 1.25E-10 | 0.009524 |
| 26July2011 | 746   | 902.46 | -21.5757 | 3 K.RKLEYTIS Splice@chr   | 1.97E-10 | 0.009524 |
| 26July2011 | 3408  | 836.94 | 6.20627  | 2 R.IGENLST5 chr3@8855    | 3.23E-13 | 0        |
| 26July2011 | 7840  | 757.43 | 9.360043 | 2 F.QVFENV\ chr3@8444     | 3.55E-10 | 0.007752 |
| 26July2011 | 3062  | 559.79 | 11.35993 | 2 R.DGWSIG6 chr4@4255     | 6.28E-11 | 0.001168 |
| 26July2011 | 10029 | 794.38 | -28.189  | 1 _ .TMSKNGI chr4@8922    | 3.73E-10 | 0.008239 |
| 26July2011 | 5036  | 897.42 | -27.6753 | 3 _ .QVREMH Splice@chr    | 6.80E-11 | 0.001168 |
| 26July2011 | 7191  | 990.5  | -11.7554 | 2 F.RLSESELE chr4@7519    | 3.03E-10 | 0.007051 |
| 26July2011 | 9964  | 619.33 | 1.81184  | 3 K.EIK+14.0: chr5@7582   | 3.12E-11 | 9.01E-04 |
| 26July2011 | 843   | 584.3  | -7.53396 | 2 R.FSLKNTel chr4@2692    | 3.78E-10 | 0.008729 |
| 26July2011 | 5615  | 479.27 | -26.2887 | 3 _ .AII SPLGC Splice@chr | 4.71E-13 | 0        |
| 26July2011 | 8298  | 902.46 | -21.5757 | 3 K.RKLEYTIS Splice@chr   | 1.74E-10 | 0.004114 |
| 26July2011 | 83    | 688.3  | 6.038794 | 2 R.GGDGGA chr3@2778      | 4.97E-13 | 0        |
| 26July2011 | 7072  | 555.63 | -25.3104 | 3 R.YFKGGGk chr1@1628     | 3.42E-10 | 0.007521 |
| 26July2011 | 5579  | 472.29 | -0.64754 | 2 _ .SPLFVPKf chrX@4402   | 1.97E-10 | 0.005413 |
| 26July2011 | 5301  | 472.29 | -0.64754 | 2 _ .SPLFVPKf chrX@4402   | 2.63E-10 | 0.006647 |
| 26July2011 | 361   | 632.78 | -25.4076 | 2 _ .KM+15.9 Splice@chr   | 1.06E-10 | 0.001984 |
| 26July2011 | 4225  | 452.73 | -24.0502 | 2 K.SVDLVDt chr5@8505     | 8.19E-11 | 0.001168 |
| 26July2011 | 1292  | 472.3  | 20.52712 | 2 _ .SPLFVPKf chrX@4402   | 1.30E-10 | 0.006353 |
| 26July2011 | 739   | 560.82 | 28.56613 | 2 R.PDFSLNS. chr3@3320    | 3.24E-11 | 0.001395 |
| 26July2011 | 2146  | 628.82 | 23.72195 | 2 R.REESSFQ. Splice@chr   | 1.41E-10 | 0.007463 |
| 26July2011 | 4741  | 472.29 | -0.64754 | 2 _ .SPLFVPKf chrX@4402   | 1.30E-10 | 0.004697 |
| 26July2011 | 4911  | 479.27 | -26.2887 | 3 _ .AII SPLGC Splice@chr | 1.09E-10 | 0.004697 |
| 26July2011 | 3720  | 509.3  | -20.473  | 2 R.SSVIMLIV chr2@5767    | 1.98E-11 | 5.13E-04 |
| 26July2011 | 118   | 495.26 | -0.67919 | 2 _ .RDEAQSk Splice@chr   | 1.60E-10 | 0.005887 |
| 26July2011 | 1833  | 768.9  | -19.3937 | 2 R.RSFK+14. chr4@8857    | 5.50E-11 | 0.002326 |
| 26July2011 | 4687  | 472.29 | -0.64754 | 2 _ .SPLFVPKf chrX@4402   | 1.30E-10 | 0.004697 |
| 26July2011 | 3048  | 499.75 | 25.85062 | 2 _ .QFFSDPE Splice@chr   | 7.58E-11 | 0.003135 |
| 26July2011 | 3653  | 509.3  | -20.473  | 2 R.SSVIMLIV chr2@5767    | 2.66E-11 | 9.82E-04 |
| 26July2011 | 1054  | 641.28 | -9.81857 | 2 _ .CFFSVDA chr3@9630    | 2.24E-10 | 0.009289 |
| 26July2011 | 5076  | 672.02 | -1.39472 | 3 K.WAMPEN chrX@4851      | 1.82E-10 | 0.007861 |

|            |      |        |          |                           |          |          |
|------------|------|--------|----------|---------------------------|----------|----------|
| 26July2011 | 3386 | 858.48 | 6.006088 | 3 _..LETGIHKP: Splice@chr | 3.62E-11 | 6.19E-04 |
| 26July2011 | 3302 | 994.84 | -20.7023 | 3 K.SQVFSTA chrX@6089     | 1.31E-13 | 0        |
| 26July2011 | 2025 | 793.91 | -25.0169 | 2 _..FKKK+14. chr2@1162   | 8.37E-11 | 0.005674 |
| 26July2011 | 2944 | 509.3  | -20.473  | 2 R.SSVIMLIV chr2@5767    | 3.76E-11 | 0.002406 |
| 26July2011 | 3638 | 515.62 | -18.8182 | 3 K.ILKIK+14. chr2@1445   | 2.18E-10 | 0.009032 |
| 26July2011 | 4537 | 752.37 | -29.649  | 2 R.AEEIEEK+ chr2@1375    | 1.97E-10 | 0.007833 |
| 26July2011 | 6819 | 984.52 | 23.31644 | 2 R.NWNTLIC chr3@8316     | 1.61E-10 | 0.006676 |
| 26July2011 | 3679 | 515.62 | -18.8182 | 3 K.ILKIK+14. chr2@1445   | 6.48E-11 | 0.004444 |
| 26July2011 | 7637 | 434.89 | -13.2785 | 3 R.MKRHSA chr5@1170      | 1.46E-10 | 0.007986 |
| 26July2011 | 3364 | 509.3  | -20.473  | 2 R.SSVIMLIV chr2@5767    | 3.49E-11 | 0.002008 |
| 26July2011 | 2346 | 559.79 | 11.35993 | 2 R.DGWSIG: chr4@4255     | 8.03E-11 | 0.002962 |
| 26July2011 | 4200 | 472.29 | -0.64754 | 2 _..SPLFVPKf chrX@4402   | 1.30E-10 | 0.006373 |
| 26July2011 | 4215 | 705.69 | -27.0057 | 3 K.NSVQYLS chr5@3315     | 1.45E-10 | 0.007484 |
| 26July2011 | 6539 | 988.05 | 18.46899 | 2 K.FDYFNMI chr4@1602     | 1.53E-11 | 0        |
| 26July2011 | 6263 | 757.43 | 9.360043 | 2 F.QVFENV\ chr3@8444     | 9.89E-11 | 0.002962 |
| 26July2011 | 3411 | 509.3  | -20.473  | 2 R.SSVIMLIV chr2@5767    | 1.88E-11 | 0        |
| 26July2011 | 946  | 433.76 | 2.609238 | 2 _..IVDLPGPI chr3@1104   | 5.72E-11 | 0.002962 |
| 26July2011 | 2719 | 702.68 | -18.4193 | 3 _..SLKNMKE chr2@9388    | 7.95E-12 | 0        |
| 26July2011 | 1510 | 485.25 | 21.36468 | 2 K.MNTEFLS chr5@7280     | 1.10E-10 | 0.002962 |
| 26July2011 | 4169 | 515.62 | -18.8182 | 3 K.ILKIK+14. chr2@1445   | 5.60E-11 | 0.002962 |
| 26July2011 | 126  | 560.82 | 28.56613 | 2 R.PDFSLNS. chr3@3320    | 8.34E-11 | 0.01     |
| 26July2011 | 5195 | 555.97 | -15.3684 | 3 R.YFK+14.0 chr1@1628    | 2.83E-12 | 0        |
| 26July2011 | 1156 | 456.27 | 12.8705  | 3 K.TKLIINNL chr4@6321    | 1.48E-10 | 0.004585 |
| 26July2011 | 4357 | 924.91 | -13.6479 | 2 Q.KPDDISN Splice@chr    | 5.27E-11 | 0.001252 |
| 26July2011 | 5343 | 588.31 | -13.7179 | 3 K.NYDQCAI chrX@1180     | 3.85E-11 | 0.001252 |
| 26July2011 | 3676 | 479.27 | -26.2887 | 3 _..AILSPLGC Splice@chr  | 7.41E-11 | 0.003659 |
| 26July2011 | 5142 | 858.48 | 6.006088 | 3 _..LETGIHKP: Splice@chr | 1.35E-12 | 0        |
| 26July2011 | 125  | 513.31 | -9.53103 | 2 K.LGLGSGL chr5@4945     | 7.29E-11 | 0        |
| 26July2011 | 531  | 472.29 | -0.64754 | 2 _..SPLFVPKf chrX@4402   | 2.61E-10 | 0.003436 |
| 26July2011 | 694  | 472.29 | -0.64754 | 2 _..SPLFVPKf chrX@4402   | 1.30E-10 | 0        |
| 26July2011 | 217  | 560.82 | 28.56613 | 2 R.PDFSLNS. chr3@3320    | 1.50E-10 | 0        |
| 26July2011 | 216  | 513.31 | -9.53103 | 2 K.LGLGSGL chr5@4945     | 4.40E-11 | 0        |
| 26July2011 | 1055 | 853.81 | -16.5858 | 3 K.KNK+14.( chr3@9948    | 4.01E-10 | 0.006803 |
| 26July2011 | 549  | 472.29 | -0.64754 | 2 _..SPLFVPKf chrX@4402   | 5.52E-10 | 0.009772 |
| 26July2011 | 2389 | 559.79 | 11.35993 | 2 R.DGWSIG: chr4@4255     | 1.30E-10 | 0.003444 |
| 26July2011 | 479  | 752.37 | -15.7589 | 2 R.LSEILNMI chr4@1051    | 4.12E-10 | 0.00565  |
| 26July2011 | 261  | 461.9  | 6.268311 | 3 K.TAEHVEC chr5@1002     | 6.14E-10 | 0.008174 |
| 26July2011 | 514  | 587.3  | 4.892896 | 2 Q.NAVEQE: Splice@chr    | 1.34E-11 | 0        |
| 26July2011 | 53   | 495.26 | -0.67919 | 2 _..RDEAQSK Splice@chr   | 2.29E-10 | 0.00565  |
| 26July2011 | 118  | 546.26 | -17.7564 | 2 R.K+14.016 chr1@1915    | 4.17E-10 | 0.00565  |
| 26July2011 | 588  | 472.29 | -0.64754 | 2 _..SPLFVPKf chrX@4402   | 1.32E-10 | 0.00838  |
| 26July2011 | 89   | 452.23 | -1.48793 | 2 R.SGEPLSA: Splice@chr   | 3.02E-11 | 0        |
| 26July2011 | 4392 | 683.05 | -17.9571 | 3 K.RKNCK+1 Splice@chr    | 1.95E-12 | 0        |
| 26July2011 | 2653 | 565.32 | 1.153692 | 3 W.ELEIKNC chr4@1215     | 3.19E-11 | 0.003444 |
| 26July2011 | 6161 | 757.43 | 9.360043 | 2 F.QVFENV\ chr3@8444     | 3.38E-11 | 0.003444 |
| 26July2011 | 1284 | 538.78 | -18.6852 | 2 K.KGWNKE chr5@1027      | 1.01E-10 | 0.00879  |
| 26July2011 | 6902 | 757.43 | 9.360043 | 2 F.QVFENV\ chr3@8444     | 5.26E-11 | 0.001993 |

|            |       |         |          |                          |          |          |
|------------|-------|---------|----------|--------------------------|----------|----------|
| 26July2011 | 6195  | 555.63  | -25.3104 | 3 R.YFK+14.0 chr1@1628   | 5.18E-11 | 0.001993 |
| 26July2011 | 3595  | 509.3   | -20.473  | 2 R.SSVIMLIV chr2@5767   | 1.31E-10 | 0.007738 |
| 26July2011 | 1059  | 460.24  | -13.7557 | 2 _ .ATDGSSII chr5@1148  | 1.97E-11 | 0        |
| 26July2011 | 3496  | 757.43  | 9.360043 | 2 F.QVFENV\ chr3@8444    | 3.48E-11 | 0.001867 |
| 26July2011 | 2741  | 858.48  | 6.006088 | 3 _ .LETGIKPI Splice@chr | 3.14E-12 | 9.51E-04 |
| 26July2011 | 31    | 506.78  | 5.370163 | 2 _ .VDKNVYF chr4@1192   | 4.02E-11 | 0.002788 |
| 26July2011 | 2238  | 509.3   | -20.473  | 2 R.SSVIMLIV chr2@5767   | 3.11E-11 | 0.007429 |
| 26July2011 | 2520  | 509.3   | -20.473  | 2 R.SSVIMLIV chr2@5767   | 1.88E-11 | 0.004724 |
| 26July2011 | 2485  | 509.3   | -20.473  | 2 R.SSVIMLIV chr2@5767   | 3.61E-11 | 0.007429 |
| 26July2011 | 5082  | 757.43  | 9.360043 | 2 F.QVFENV\ chr3@8444    | 3.73E-11 | 0.008499 |
| 26July2011 | 2175  | 509.3   | -20.473  | 2 R.SSVIMLIV chr2@5767   | 1.88E-11 | 0.004724 |
| 26July2011 | 2557  | 509.3   | -20.473  | 2 R.SSVIMLIV chr2@5767   | 1.88E-11 | 0.004724 |
| 26July2011 | 4379  | 853.81  | -16.5858 | 3 K.KNK+14.( chr3@9948   | 9.89E-12 | 0        |
| 29Nov2011  | 10305 | 752.37  | -29.649  | 2 R.AEEIEEK+ chr2@1375   | 3.87E-11 | 8.86E-04 |
| 29Nov2011  | 16781 | 1065.2  | -17.9563 | 3 K.SGTIFDNI Splice@chr  | 1.53E-10 | 0.004247 |
| 29Nov2011  | 1020  | 439.74  | 18.7116  | 2 R.SIAMFGP chr2@4157    | 2.51E-10 | 0.007795 |
| 29Nov2011  | 5267  | 1025.62 | -1.90621 | 1 K.LGLGSGL chr5@4945    | 6.09E-11 | 0.001208 |
| 29Nov2011  | 5848  | 566.31  | 21.45326 | 2 R.EVAQLEC chr5@1706    | 1.36E-10 | 0.003947 |
| 29Nov2011  | 14146 | 858.45  | -15.2049 | 2 R.RM+15.9 chr1@1195    | 8.18E-11 | 0.001872 |
| 29Nov2011  | 2152  | 411.55  | -26.8589 | 3 K.ALQM+1! chr3@1125    | 2.26E-10 | 0.006406 |
| 29Nov2011  | 2616  | 877.41  | -12.3383 | 1 K.TEDEARR chrX@1138    | 1.58E-10 | 0.004247 |
| 29Nov2011  | 7653  | 762.39  | -14.4775 | 2 K.KM+15.9 chr1@3075    | 2.67E-10 | 0.008401 |
| 29Nov2011  | 15960 | 792.15  | -18.5783 | 4 K.SGTIFDNI Splice@chr  | 5.96E-14 | 0        |
| 29Nov2011  | 4984  | 868.43  | 10.92162 | 1 K.SSSGSLSS chr2@1132   | 2.72E-10 | 0.008707 |
| 29Nov2011  | 11743 | 1090.54 | -8.93818 | 2 K.INGVTVA chr3@6296    | 7.80E-11 | 0.001705 |
| 29Nov2011  | 3525  | 1106.57 | -9.7164  | 1 _ .SSLDKESC chr5@1239  | 1.91E-10 | 0.005184 |
| 29Nov2011  | 614   | 533.76  | 0.976743 | 2 G.FGGGGIS chr2@5085    | 2.20E-10 | 0.006091 |
| 29Nov2011  | 2636  | 876.41  | -8.50606 | 1 K.TEDEARR chrX@1138    | 4.26E-11 | 0.001047 |
| 29Nov2011  | 15850 | 792.15  | -18.5783 | 4 K.SGTIFDNI Splice@chr  | 3.83E-13 | 0        |
| 29Nov2011  | 5506  | 717.9   | -3.32039 | 2 K.LRGWNK chr3@8881     | 1.28E-10 | 0.003637 |
| 29Nov2011  | 15875 | 791.9   | -17.5179 | 4 K.SGTIFDNI Splice@chr  | 3.03E-15 | 0        |
| 29Nov2011  | 6985  | 625.82  | -20.2839 | 2 R.K+14.016 chrX@1356   | 2.09E-10 | 0.00563  |
| 29Nov2011  | 5805  | 566.31  | 21.45326 | 2 R.EVAQLEC chr5@1706    | 6.40E-11 | 0.001375 |
| 29Nov2011  | 16006 | 792.15  | -18.5783 | 4 K.SGTIFDNI Splice@chr  | 2.37E-12 | 0        |
| 29Nov2011  | 5170  | 866.48  | -1.97443 | 1 R.TTAIGFG, chr1@1378   | 2.44E-12 | 0        |
| 29Nov2011  | 4688  | 1026.62 | -5.1804  | 1 K.LGLGSGL chr5@4945    | 1.20E-11 | 4.31E-04 |
| 29Nov2011  | 2046  | 830.42  | -5.08114 | 1 K.YVYG TAR Splice@chr  | 4.22E-11 | 0.001448 |
| 29Nov2011  | 9228  | 948.99  | -14.4606 | 2 K.RKRLSM+ Splice@chr   | 2.28E-10 | 0.006801 |
| 29Nov2011  | 13834 | 792.15  | -18.5783 | 4 K.SGTIFDNI Splice@chr  | 1.43E-13 | 0        |
| 29Nov2011  | 5155  | 566.31  | 21.45326 | 2 R.EVAQLEC chr5@1706    | 6.25E-11 | 0.002026 |
| 29Nov2011  | 5491  | 1086.02 | 18.22629 | 2 V.CLTEEGK Splice@chr   | 7.12E-11 | 0.002205 |
| 29Nov2011  | 11367 | 791.9   | -15.2799 | 2 F.QFM+15. chr4@1546    | 2.10E-10 | 0.006452 |
| 29Nov2011  | 9286  | 719.39  | 28.86707 | 2 R.FTQAGSE Splice@chr   | 2.14E-13 | 0        |
| 29Nov2011  | 12626 | 665.37  | -26.6417 | 2 Q.INNK+14 Splice@chr   | 1.52E-10 | 0.004444 |
| 29Nov2011  | 4761  | 677.34  | -8.57314 | 2 K.MQQFST chr5@2080     | 1.68E-10 | 0.004612 |
| 29Nov2011  | 7134  | 1345.63 | -24.7692 | 2 _ .QVREMH Splice@chr   | 2.19E-10 | 0.006633 |
| 29Nov2011  | 12742 | 834.44  | -21.0656 | 2 _ .KYLFFVEF chr3@1094  | 9.88E-11 | 0.003166 |

|           |       |         |          |                          |          |          |
|-----------|-------|---------|----------|--------------------------|----------|----------|
| 29Nov2011 | 88    | 479.79  | -15.6161 | 2 _..KMVSPRI chr1@1106   | 2.05E-10 | 0.006093 |
| 29Nov2011 | 14274 | 917.51  | 5.964791 | 2 _..SIMSRLEI Splice@chr | 2.85E-10 | 0.00838  |
| 29Nov2011 | 5125  | 566.31  | 21.45326 | 2 R.EVAQLEC chr5@1706    | 1.12E-10 | 0.003743 |
| 29Nov2011 | 6113  | 625.82  | -20.2839 | 2 R.K+14.016 chrX@1356   | 2.02E-10 | 0.006093 |
| 29Nov2011 | 10423 | 1090.54 | -8.93818 | 2 K.INGVTVA chr3@6296    | 1.63E-10 | 0.004612 |
| 29Nov2011 | 13807 | 792.15  | -18.5783 | 4 K.SGTIFDNI Splice@chr  | 3.09E-14 | 0        |
| 29Nov2011 | 13783 | 791.9   | -17.5179 | 4 K.SGTIFDNI Splice@chr  | 1.41E-16 | 0        |
| 29Nov2011 | 9185  | 752.37  | -29.649  | 2 R.AEEIEEK+ chr2@1375   | 2.65E-10 | 0.007881 |
| 29Nov2011 | 13736 | 792.15  | -18.5783 | 4 K.SGTIFDNI Splice@chr  | 1.63E-12 | 2.55E-04 |
| 29Nov2011 | 19395 | 962.8   | 19.96909 | 3 _..GCSIVPIS Splice@chr | 1.78E-10 | 0.00461  |
| 29Nov2011 | 9609  | 1346.13 | -3.69865 | 2 _..QVREMH Splice@chr   | 3.31E-10 | 0.008012 |
| 29Nov2011 | 8371  | 625.82  | -20.2839 | 2 R.K+14.016 chrX@1356   | 2.87E-10 | 0.007272 |
| 29Nov2011 | 1594  | 587.3   | 4.892896 | 2 Q.NAVEQE Splice@chr    | 3.83E-11 | 0.001021 |
| 29Nov2011 | 4183  | 793.93  | -3.84873 | 2 R.TK+14.01 chr1@7238   | 7.12E-11 | 0.002584 |
| 29Nov2011 | 18572 | 1124.59 | 9.734324 | 1 K.MM+15.5 chr4@1389    | 1.36E-10 | 0.003592 |
| 29Nov2011 | 9672  | 1345.63 | -24.7692 | 2 _..QVREMH Splice@chr   | 1.63E-10 | 0.00427  |
| 29Nov2011 | 11413 | 538.29  | 5.831492 | 3 K.TFEISTRA Splice@chr  | 3.04E-10 | 0.007596 |
| 29Nov2011 | 3300  | 876.41  | -8.50606 | 1 K.TEDEARR chrX@1138    | 2.73E-10 | 0.007167 |
| 29Nov2011 | 6985  | 566.31  | 21.45326 | 2 R.EVAQLEC chr5@1706    | 2.29E-11 | 5.27E-04 |
| 29Nov2011 | 15823 | 792.48  | 26.43103 | 2 R.SRFAPPSI Splice@chr  | 1.17E-10 | 0.003366 |
| 29Nov2011 | 13043 | 1049.53 | 15.08228 | 3 G.DQSVDS chr4@9165     | 1.49E-11 | 4.00E-04 |
| 29Nov2011 | 12226 | 719.39  | 28.86707 | 2 R.FTQAGSE Splice@chr   | 7.66E-14 | 0        |
| 29Nov2011 | 67    | 722.35  | 3.723    | 1 R.FQGGGEI chr1@2595    | 3.33E-10 | 0.008122 |
| 29Nov2011 | 6355  | 1025.62 | -1.90621 | 1 K.LGLGSGL chr5@4945    | 6.50E-12 | 2.80E-04 |
| 29Nov2011 | 3255  | 685.38  | -12.3964 | 2 K.ISTQTHIC chr4@7638   | 2.58E-10 | 0.006849 |
| 29Nov2011 | 15298 | 910.99  | -12.6489 | 2 Y.FKNIDKD Splice@chr   | 2.23E-10 | 0.005961 |
| 29Nov2011 | 6963  | 1131.61 | 19.50805 | 1 R.EVAQLEC chr5@1706    | 1.20E-10 | 0.003366 |
| 29Nov2011 | 314   | 722.35  | 3.723    | 1 R.FQGGGEI chr1@2595    | 3.33E-10 | 0.008122 |
| 29Nov2011 | 19458 | 528.21  | -26.1287 | 2 K.TCEESGA Splice@chr   | 9.76E-11 | 0.002925 |
| 29Nov2011 | 10347 | 657.04  | -26.9179 | 3 R.GNVRK+1 chrX@7490    | 2.29E-10 | 0.006303 |
| 29Nov2011 | 6407  | 1025.62 | -1.90621 | 1 K.LGLGSGL chr5@4945    | 4.63E-11 | 0.001399 |
| 29Nov2011 | 8430  | 625.82  | -20.2839 | 2 R.K+14.016 chrX@1356   | 3.10E-10 | 0.007596 |
| 29Nov2011 | 12312 | 719.39  | 28.86707 | 2 R.FTQAGSE Splice@chr   | 3.51E-13 | 0        |
| 29Nov2011 | 12000 | 1128.05 | 6.854678 | 2 _..IPSAVGY Splice@chr  | 1.03E-10 | 0.00316  |
| 29Nov2011 | 7481  | 724.35  | 19.12636 | 3 V.CLTEEGK Splice@chr   | 1.45E-10 | 0.003817 |
| 29Nov2011 | 7486  | 1086.02 | 18.22629 | 2 V.CLTEEGK Splice@chr   | 1.60E-10 | 0.00427  |
| 29Nov2011 | 4292  | 794.43  | -5.96418 | 2 R.TK+14.01 chr1@7238   | 6.25E-11 | 0.001999 |
| 29Nov2011 | 3655  | 741.39  | -17.2291 | 2 K.QKSNWH chr5@1229     | 3.92E-11 | 0.001021 |
| 29Nov2011 | 755   | 444.25  | -3.23598 | 2 R.AELSSRPI chr3@8104   | 2.34E-10 | 0.006643 |
| 29Nov2011 | 1412  | 401.74  | 27.30093 | 2 R.IEAGGGC chr5@8776    | 1.02E-12 | 2.80E-04 |
| 29Nov2011 | 2010  | 1059.54 | -17.6437 | 1 _..YDHKNAI chr5@1738   | 3.14E-10 | 0.007708 |
| 29Nov2011 | 14268 | 917     | 8.168234 | 2 R.LTGNISM chrX@3445    | 2.56E-10 | 0.00674  |
| 29Nov2011 | 6938  | 566.31  | 21.45326 | 2 R.EVAQLEC chr5@1706    | 3.98E-11 | 0.001021 |
| 29Nov2011 | 15254 | 910.99  | -12.6489 | 2 Y.FKNIDKD Splice@chr   | 2.27E-10 | 0.006193 |
| 29Nov2011 | 6306  | 1025.62 | -1.90621 | 1 K.LGLGSGL chr5@4945    | 7.87E-12 | 2.80E-04 |
| 29Nov2011 | 4237  | 794.43  | -5.96418 | 2 R.TK+14.01 chr1@7238   | 5.07E-11 | 0.001647 |
| 29Nov2011 | 3338  | 685.38  | -12.3964 | 2 K.ISTQTHIC chr4@7638   | 5.87E-11 | 0.001803 |

|           |       |         |          |                         |          |          |
|-----------|-------|---------|----------|-------------------------|----------|----------|
| 29Nov2011 | 1471  | 401.74  | 27.30093 | 2 R.IEAGGGC chr5@8776   | 1.02E-12 | 3.58E-04 |
| 29Nov2011 | 4168  | 794.43  | -5.96418 | 2 R.TK+14.01 chr1@7238  | 9.01E-11 | 0.002414 |
| 29Nov2011 | 14883 | 758.37  | 10.90412 | 4 _MREEGM chr1@2888     | 1.79E-10 | 0.003639 |
| 29Nov2011 | 12056 | 1040.53 | -29.1053 | 2 V.IFSKINKN chr5@1728  | 2.06E-11 | 0.001159 |
| 29Nov2011 | 12058 | 1040.03 | -27.4909 | 2 V.IFSKINKN chr5@1728  | 4.31E-11 | 0.001405 |
| 29Nov2011 | 11463 | 719.39  | 28.86707 | 2 R.FTQAGSE Splice@chr  | 1.98E-13 | 1.85E-04 |
| 29Nov2011 | 7242  | 975.56  | -2.75567 | 1 K.LPKLDAYI chr4@1149  | 1.27E-10 | 0.002763 |
| 29Nov2011 | 4990  | 693.87  | -6.6949  | 2 V.ICVAVGD chr5@1065   | 2.43E-10 | 0.005908 |
| 29Nov2011 | 11841 | 852.91  | 1.862793 | 2 R.FQMQRNL chr1@1224   | 3.76E-10 | 0.008751 |
| 29Nov2011 | 16892 | 968.47  | 20.13314 | 3 _CSIRPISG Splice@chr  | 1.08E-10 | 0.00253  |
| 29Nov2011 | 6648  | 566.31  | 21.45326 | 2 R.EVAQLEC chr5@1706   | 7.79E-11 | 0.002175 |
| 29Nov2011 | 4115  | 793.93  | -3.84873 | 2 R.TK+14.01 chr1@7238  | 2.53E-10 | 0.006148 |
| 29Nov2011 | 7910  | 625.82  | -20.2839 | 2 R.K+14.016 chrX@1356  | 1.18E-10 | 0.00253  |
| 29Nov2011 | 12882 | 515.3   | 13.29211 | 3 K.PNFTVILS chr4@1642  | 2.11E-10 | 0.004395 |
| 29Nov2011 | 2796  | 411.55  | -26.8589 | 3 K.ALQM+1! chr3@1125   | 8.02E-11 | 0.002175 |
| 29Nov2011 | 12839 | 515.3   | 13.29211 | 3 K.PNFTVILS chr4@1642  | 3.13E-10 | 0.007337 |
| 29Nov2011 | 10931 | 1288.71 | -10.8067 | 2 K.TKKQKKK chrX@6244   | 3.45E-10 | 0.007906 |
| 29Nov2011 | 4286  | 1106.57 | -9.7164  | 1 _SSLDKESC chr5@1239   | 3.12E-10 | 0.007337 |
| 29Nov2011 | 7060  | 724.35  | 19.12636 | 3 V.CLTEEGK Splice@chr  | 4.13E-12 | 4.77E-04 |
| 29Nov2011 | 3574  | 741.39  | -17.2291 | 2 K.QKSNWH chr5@1229    | 1.03E-10 | 0.002414 |
| 29Nov2011 | 14916 | 895     | -10.9918 | 2 K.M+15.99 chrX@1449   | 2.27E-10 | 0.005414 |
| 29Nov2011 | 7042  | 1086.02 | 18.22629 | 2 V.CLTEEGK Splice@chr  | 3.25E-10 | 0.00743  |
| 29Nov2011 | 7291  | 975.56  | -2.75567 | 1 K.LPKLDAYI chr4@1149  | 3.81E-11 | 0.001405 |
| 29Nov2011 | 13371 | 762.4   | 0.669255 | 3 _FYSM+15 chrX@9985    | 3.89E-10 | 0.009238 |
| 29Nov2011 | 14356 | 911     | -1.64299 | 2 Y.FKNIDKD Splice@chr  | 1.03E-10 | 0.002414 |
| 29Nov2011 | 8912  | 1345.63 | -24.7692 | 2 _QVREMH Splice@chr    | 2.96E-10 | 0.00709  |
| 29Nov2011 | 8767  | 954.49  | 14.74095 | 1 K.MTTSSLT chrX@7280   | 3.46E-10 | 0.007906 |
| 29Nov2011 | 14425 | 910.99  | -12.6489 | 2 Y.FKNIDKD Splice@chr  | 3.86E-10 | 0.009238 |
| 29Nov2011 | 6223  | 1025.62 | -1.90621 | 1 K.LGLGSL chr5@4945    | 7.45E-12 | 7.72E-04 |
| 29Nov2011 | 6700  | 566.31  | 21.45326 | 2 R.EVAQLEC chr5@1706   | 2.17E-11 | 0.001159 |
| 29Nov2011 | 14807 | 791.9   | -17.5179 | 4 K.SGTIFDNI Splice@chr | 1.21E-13 | 0        |
| 29Nov2011 | 12540 | 988.05  | 18.46899 | 2 K.FDYFNMI chr4@1602   | 2.78E-10 | 0.008983 |
| 29Nov2011 | 5565  | 566.31  | 21.45326 | 2 R.EVAQLEC chr5@1706   | 1.56E-10 | 0.006202 |
| 29Nov2011 | 15263 | 528.21  | -26.1287 | 2 K.TCEESGA Splice@chr  | 2.50E-11 | 0.001825 |
| 29Nov2011 | 3201  | 794.43  | -5.96418 | 2 R.TK+14.01 chr1@7238  | 1.47E-11 | 9.37E-04 |
| 29Nov2011 | 3155  | 794.43  | -5.96418 | 2 R.TK+14.01 chr1@7238  | 2.21E-11 | 0.001382 |
| 29Nov2011 | 12382 | 791.9   | -15.2799 | 2 F.QFM+15. chr4@1546   | 1.37E-10 | 0.005887 |
| 29Nov2011 | 2588  | 1184.58 | 10.47923 | 1 K.KCNYSKN chrX@1241   | 9.91E-11 | 0.00498  |
| 29Nov2011 | 380   | 586.29  | 24.82004 | 2 K.HQHHLPI Splice@chr  | 1.92E-11 | 0.001382 |
| 29Nov2011 | 7501  | 762.85  | -15.3018 | 2 G.TSK+14.C chr5@9327  | 8.33E-11 | 0.004413 |
| 29Nov2011 | 7546  | 762.85  | -15.3018 | 2 G.TSK+14.C chr5@9327  | 1.16E-10 | 0.005537 |
| 29Nov2011 | 14005 | 1003.53 | 22.67704 | 3 R.CWNRRA Splice@chr   | 2.87E-10 | 0.009731 |
| 29Nov2011 | 9568  | 1115.1  | 6.276672 | 2 S.LYSSCPE chrX@1173   | 2.90E-10 | 0.009731 |
| 29Nov2011 | 14786 | 792.15  | -18.5783 | 4 K.SGTIFDNI Splice@chr | 5.41E-14 | 0        |
| 29Nov2011 | 3105  | 794.43  | -5.96418 | 2 R.TK+14.01 chr1@7238  | 6.18E-11 | 0.003624 |
| 29Nov2011 | 1425  | 1059.54 | -17.6437 | 1 _YDHKNAI chr5@1738    | 3.84E-11 | 0.00222  |
| 29Nov2011 | 5518  | 566.31  | 21.45326 | 2 R.EVAQLEC chr5@1706   | 7.03E-11 | 0.004035 |

|           |       |         |          |                          |          |          |
|-----------|-------|---------|----------|--------------------------|----------|----------|
| 29Nov2011 | 4978  | 1025.62 | -1.90621 | 1 K.LGLGSGL chr5@4945    | 2.76E-11 | 0.002008 |
| 29Nov2011 | 8417  | 908.98  | -18.8645 | 2 _._RISSRAVF Splice@chr | 1.43E-11 | 7.11E-04 |
| 29Nov2011 | 5836  | 934.45  | -14.385  | 1 K.SDSAQIM chr4@1711    | 6.84E-11 | 0.003831 |
| 29Nov2011 | 3305  | 446.75  | 3.354779 | 2 R.IFSAGELF chr3@5608   | 1.87E-10 | 0.006566 |
| 29Nov2011 | 7239  | 595.66  | -25.5699 | 3 K.LKLTAKT chr5@9936    | 1.02E-10 | 0.00498  |
| 29Nov2011 | 15156 | 917.51  | 5.964791 | 2 _._SIMSRLEF Splice@chr | 2.28E-10 | 0.007511 |
| 29Nov2011 | 1829  | 411.55  | -26.8589 | 3 K.ALQM+1! chr3@1125    | 2.26E-10 | 0.007565 |
| 29Nov2011 | 8078  | 908.98  | -18.8645 | 2 _._RISSRAVF Splice@chr | 9.98E-12 | 0.001235 |
| 29Nov2011 | 2929  | 626.3   | -9.76097 | 2 R.LCESGAA Splice@chr   | 2.50E-15 | 0        |
| 29Nov2011 | 6231  | 625.82  | -20.2839 | 2 R.K+14.016 chrX@1356   | 2.13E-10 | 0.007181 |
| 29Nov2011 | 2359  | 1184.59 | 18.94375 | 1 K.KCNYSKN chrX@1241    | 2.30E-10 | 0.007765 |
| 29Nov2011 | 2135  | 830.42  | -5.08114 | 1 K.YVYG TAR Splice@chr  | 2.53E-10 | 0.008554 |
| 29Nov2011 | 841   | 439.74  | 18.7116  | 2 R.SIAMFGP chr2@4157    | 1.97E-10 | 0.006803 |
| 29Nov2011 | 3009  | 794.43  | -5.96418 | 2 R.TK+14.01 chr1@7238   | 7.76E-11 | 0.00359  |
| 29Nov2011 | 1793  | 487.3   | 24.66358 | 2 K.LQTSNGL Splice@chr   | 2.20E-10 | 0.007376 |
| 29Nov2011 | 14974 | 1138.62 | -11.8655 | 1 K.KSEMK+1 chr2@1477    | 3.13E-10 | 0.009856 |
| 29Nov2011 | 13145 | 1072.55 | -28.1212 | 2 R.YFFLIKNY chr5@1791   | 2.18E-11 | 0.001675 |
| 29Nov2011 | 3050  | 794.43  | -5.96418 | 2 R.TK+14.01 chr1@7238   | 1.85E-11 | 0.001675 |
| 29Nov2011 | 5280  | 566.31  | 21.45326 | 2 R.EVAQLEC chr5@1706    | 8.59E-11 | 0.003796 |
| 29Nov2011 | 9234  | 752.37  | -29.649  | 2 R.AEEIEEK+ chr2@1375   | 3.07E-10 | 0.009856 |
| 29Nov2011 | 2343  | 1183.58 | 13.31613 | 1 K.KCNYSKN chrX@1241    | 3.21E-11 | 0.002556 |
| 29Nov2011 | 14157 | 770.39  | 12.07686 | 1 R.MKTMM chr1@4694      | 2.67E-10 | 0.009559 |
| 29Nov2011 | 7222  | 1345.63 | -24.7692 | 2 _._QVREMH Splice@chr   | 5.35E-11 | 0.003204 |
| 29Nov2011 | 13478 | 934.48  | 16.93502 | 2 R.QFRQSGI chr5@4795    | 1.58E-10 | 0.005149 |
| 29Nov2011 | 13121 | 1003.19 | 17.13413 | 3 R.CWNRRA Splice@chr    | 1.21E-12 | 2.70E-04 |
| 29Nov2011 | 3028  | 447.25  | -0.40838 | 2 R.IFSAGELF chr3@5608   | 1.87E-10 | 0.006191 |
| 29Nov2011 | 12477 | 858.45  | -15.2049 | 2 R.RM+15.9 chr1@1195    | 8.47E-12 | 0.001235 |
| 29Nov2011 | 14202 | 917.51  | 5.964791 | 2 _._SIMSRLEF Splice@chr | 2.80E-10 | 0.009687 |
| 29Nov2011 | 4690  | 866.47  | -13.5535 | 1 R.TTAIGFG, chr1@1378   | 2.37E-10 | 0.008171 |
| 29Nov2011 | 13748 | 791.9   | -17.5179 | 4 K.SGTIFDNI Splice@chr  | 6.30E-16 | 0        |
| 29Nov2011 | 6279  | 625.82  | -11.1921 | 2 I.QLEDIEFIS Splice@chr | 2.95E-10 | 0.009687 |
| 29Nov2011 | 5251  | 566.31  | 21.45326 | 2 R.EVAQLEC chr5@1706    | 2.69E-10 | 0.009559 |
| 29Nov2011 | 16023 | 792.15  | -18.5783 | 4 K.SGTIFDNI Splice@chr  | 9.39E-16 | 0        |
| 29Nov2011 | 1533  | 439.74  | 18.7116  | 2 R.SIAMFGP chr2@4157    | 7.88E-11 | 0.003689 |
| 29Nov2011 | 3941  | 794.43  | -5.96418 | 2 R.TK+14.01 chr1@7238   | 3.72E-11 | 0.001944 |
| 29Nov2011 | 874   | 410.22  | 15.60847 | 2 K.WGTPTI chr2@8222     | 2.47E-10 | 0.009707 |
| 29Nov2011 | 3897  | 794.43  | -5.96418 | 2 R.TK+14.01 chr1@7238   | 1.40E-10 | 0.006101 |
| 29Nov2011 | 8422  | 1345.63 | -24.7692 | 2 _._QVREMH Splice@chr   | 2.05E-10 | 0.008476 |
| 29Nov2011 | 2147  | 519.29  | 8.714637 | 2 K.SIYGLEISf chr1@4967  | 2.50E-10 | 0.009707 |
| 29Nov2011 | 3166  | 876.41  | -8.50606 | 1 K.TEDEARR chrX@1138    | 4.26E-11 | 0.002119 |
| 29Nov2011 | 4052  | 794.43  | -5.96418 | 2 R.TK+14.01 chr1@7238   | 1.24E-10 | 0.005768 |
| 29Nov2011 | 2188  | 519.29  | 8.714637 | 2 K.SIYGLEISf chr1@4967  | 2.06E-10 | 0.008476 |
| 29Nov2011 | 5808  | 1025.62 | -1.90621 | 1 K.LGLGSGL chr5@4945    | 2.37E-11 | 0.001546 |
| 29Nov2011 | 6364  | 566.31  | 21.45326 | 2 R.EVAQLEC chr5@1706    | 1.33E-10 | 0.005931 |
| 29Nov2011 | 7146  | 870.57  | 10.89471 | 1 _._TPLAKLAI Splice@chr | 1.28E-10 | 0.005768 |
| 29Nov2011 | 15981 | 792.15  | -18.5783 | 4 K.SGTIFDNI Splice@chr  | 1.94E-15 | 0        |
| 29Nov2011 | 3209  | 876.41  | -8.50606 | 1 K.TEDEARR chrX@1138    | 4.26E-11 | 0.002119 |

|           |       |         |          |                          |          |          |
|-----------|-------|---------|----------|--------------------------|----------|----------|
| 29Nov2011 | 3996  | 794.43  | -5.96418 | 2 R.TK+14.01 chr1@7238   | 1.66E-11 | 0.001121 |
| 29Nov2011 | 7484  | 625.82  | -20.2839 | 2 R.K+14.016 chrX@1356   | 1.20E-10 | 0.005401 |
| 29Nov2011 | 2542  | 537.81  | 22.93479 | 2 K.IAENSVEI chr3@1076   | 2.10E-10 | 0.008666 |
| 29Nov2011 | 3134  | 830.42  | -5.08114 | 1 K.YVYG TAR Splice@chr  | 1.76E-10 | 0.007205 |
| 29Nov2011 | 1141  | 631.34  | 2.323929 | 2 R.WLTNFRI chr5@7535    | 1.60E-10 | 0.006641 |
| 29Nov2011 | 7073  | 531.77  | 15.7546  | 4 R.WTRSVH: chr2@1084    | 7.17E-11 | 0.003099 |
| 29Nov2011 | 7807  | 1346.13 | -3.69865 | 2 _QVREMH Splice@chr     | 5.64E-11 | 0.002589 |
| 29Nov2011 | 13713 | 858.45  | -15.2049 | 2 R.RM+15.9 chr1@1195    | 7.43E-13 | 2.88E-04 |
| 29Nov2011 | 3287  | 794.43  | -5.96418 | 2 R.TK+14.01 chr1@7238   | 2.28E-11 | 0.001711 |
| 29Nov2011 | 5691  | 689.4   | 10.07229 | 2 R.NQSASSv chr4@5261    | 1.44E-10 | 0.006162 |
| 29Nov2011 | 11245 | 990.5   | -11.7554 | 2 F.RLSESELE chr4@7515   | 1.84E-10 | 0.00735  |
| 29Nov2011 | 2424  | 433.55  | -23.4869 | 3 K.SLESLNRI chr3@1032   | 5.51E-11 | 0.002589 |
| 29Nov2011 | 9352  | 711.85  | -2.70508 | 2 R.SLHTLFST Splice@chr  | 1.72E-10 | 0.00716  |
| 29Nov2011 | 6485  | 870.57  | 10.89471 | 1 _TPLAKLAI Splice@chr   | 1.23E-10 | 0.005542 |
| 29Nov2011 | 3388  | 794.43  | -5.96418 | 2 R.TK+14.01 chr1@7238   | 2.64E-11 | 0.001711 |
| 29Nov2011 | 3441  | 794.43  | -5.96418 | 2 R.TK+14.01 chr1@7238   | 4.15E-11 | 0.002393 |
| 29Nov2011 | 3336  | 794.43  | -5.96418 | 2 R.TK+14.01 chr1@7238   | 8.05E-11 | 0.003891 |
| 29Nov2011 | 15892 | 1288.15 | -28.1526 | 2 _CTAVSAS Splice@chr    | 1.32E-11 | 0.001286 |
| 29Nov2011 | 6848  | 625.82  | -20.2839 | 2 R.K+14.016 chrX@1356   | 2.12E-10 | 0.009648 |
| 29Nov2011 | 10693 | 1040.53 | -29.1053 | 2 V.IFSKINKM chr5@1728   | 1.60E-10 | 0.00654  |
| 29Nov2011 | 5250  | 752.88  | -14.2545 | 2 R.GKCNGG chr4@5126     | 1.33E-10 | 0.005542 |
| 29Nov2011 | 5744  | 566.31  | 21.45326 | 2 R.EVAQLEC chr5@1706    | 3.35E-11 | 0.001711 |
| 29Nov2011 | 2779  | 537.3   | 7.397674 | 2 K.IAENSVEI chr3@1076   | 7.55E-11 | 0.003459 |
| 29Nov2011 | 3474  | 1073.56 | 20.18419 | 2 L.KIDDFEII chr4@1685   | 1.21E-10 | 0.003667 |
| 29Nov2011 | 5480  | 867.42  | 3.24052  | 1 K.SSSGSLSS chr2@1132   | 2.32E-10 | 0.006187 |
| 29Nov2011 | 7286  | 625.82  | -11.1921 | 2 I.QLEDIEFIS Splice@chr | 3.07E-10 | 0.008567 |
| 29Nov2011 | 237   | 710.36  | -9.42683 | 2 R.NFFDK+1 chr4@1075    | 2.50E-10 | 0.00655  |
| 29Nov2011 | 17264 | 962.48  | -5.65099 | 3 R.WFWGQI chr4@3030     | 5.52E-11 | 0.001557 |
| 29Nov2011 | 10652 | 719.39  | 28.86707 | 2 R.FTQAGSE Splice@chr   | 6.43E-13 | 3.05E-04 |
| 29Nov2011 | 1294  | 818.47  | -13.3647 | 1 K.MVITNLK Splice@chr   | 2.70E-10 | 0.006796 |
| 29Nov2011 | 1119  | 401.74  | 27.30093 | 2 R.IEAGGGC chr5@8776    | 3.33E-10 | 0.008907 |
| 29Nov2011 | 8279  | 1345.13 | -23.5213 | 2 _QVREMH Splice@chr     | 2.76E-10 | 0.007298 |
| 29Nov2011 | 6797  | 781.42  | 26.80586 | 2 _ESEVTVN Splice@chr    | 9.68E-11 | 0.002756 |
| 29Nov2011 | 8328  | 1345.63 | -24.7692 | 2 _QVREMH Splice@chr     | 1.64E-10 | 0.005313 |
| 29Nov2011 | 6134  | 566.31  | 21.45326 | 2 R.EVAQLEC chr5@1706    | 2.69E-11 | 5.85E-04 |
| 29Nov2011 | 9011  | 571.33  | 16.76655 | 3 _SKINVLEN Splice@chr   | 1.33E-10 | 0.00406  |
| 29Nov2011 | 1476  | 947.5   | -10.8427 | 1 K.NNSKNLT chr4@4595    | 1.50E-10 | 0.004974 |
| 29Nov2011 | 16924 | 1288.16 | -20.373  | 2 _CTAVSAS Splice@chr    | 7.20E-12 | 3.05E-04 |
| 29Nov2011 | 13829 | 989.54  | 2.811837 | 2 K.WKLK+14 Splice@chr   | 2.50E-10 | 0.00655  |
| 29Nov2011 | 11849 | 1090.54 | -8.93818 | 2 K.INGVTVA chr3@6296    | 1.14E-10 | 0.003667 |
| 29Nov2011 | 1037  | 409.74  | -10.6768 | 2 K.MVITNLK Splice@chr   | 3.46E-10 | 0.009532 |
| 29Nov2011 | 7919  | 595.33  | -18.0744 | 3 K.LKLT LAKT chr5@9936  | 6.34E-12 | 3.05E-04 |
| 29Nov2011 | 4113  | 522.27  | -24.2    | 2 K.VLAMMV chr2@4881     | 3.38E-10 | 0.009532 |
| 29Nov2011 | 283   | 722.35  | 3.723    | 1 R.FQGGGEI chr1@2595    | 3.33E-10 | 0.008921 |
| 29Nov2011 | 13518 | 1216.59 | -11.6275 | 2 L.RNTRNDI chr4@1012    | 1.09E-10 | 0.003501 |
| 29Nov2011 | 16751 | 792.15  | -18.5783 | 4 K.SGTIFDNI Splice@chr  | 9.85E-11 | 0.003501 |
| 29Nov2011 | 1845  | 934.47  | 6.996328 | 1 _EYQPELR Splice@chr    | 3.66E-10 | 0.009865 |

|           |       |         |          |                         |          |          |
|-----------|-------|---------|----------|-------------------------|----------|----------|
| 29Nov2011 | 16736 | 792.15  | -18.5783 | 4 K.SGTIFDNI Splice@chr | 8.79E-12 | 5.38E-04 |
| 29Nov2011 | 8070  | 595.33  | -18.0744 | 3 K.LKLTAKT chr5@9936   | 7.45E-12 | 5.38E-04 |
| 29Nov2011 | 3228  | 537.3   | 7.397674 | 2 K.IAENSVEI chr3@1076  | 3.42E-10 | 0.009052 |
| 29Nov2011 | 8374  | 762.85  | -15.3018 | 2 G.TSK+14.C chr5@9327  | 1.04E-10 | 0.003501 |
| 29Nov2011 | 8399  | 1345.13 | -23.5213 | 2 _QVREMH Splice@chr    | 1.33E-10 | 0.004364 |
| 29Nov2011 | 9081  | 870.57  | 10.89471 | 1 _TPLAKLAI Splice@chr  | 1.26E-10 | 0.003925 |
| 29Nov2011 | 10720 | 719.39  | 28.86707 | 2 R.FTQAGSE Splice@chr  | 1.20E-12 | 4.13E-04 |
| 29Nov2011 | 16099 | 1216.6  | -3.3897  | 2 L.RNTRNDI chr4@1012   | 3.17E-10 | 0.008804 |
| 29Nov2011 | 8344  | 1345.63 | -24.7692 | 2 _QVREMH Splice@chr    | 3.24E-10 | 0.008804 |
| 29Nov2011 | 16371 | 1288.15 | -28.1526 | 2 _CTAVSAS Splice@chr   | 3.31E-10 | 0.008921 |
| 29Nov2011 | 9307  | 1146.07 | 17.51893 | 2 K.VIGIQEYI Splice@chr | 1.81E-10 | 0.005894 |
| 29Nov2011 | 11620 | 990.5   | -11.7554 | 2 F.RLSESELE chr4@7519  | 1.28E-10 | 0.004223 |
| 29Nov2011 | 2398  | 411.55  | -26.8589 | 3 K.ALQM+1! chr3@1125   | 3.17E-10 | 0.008804 |
| 29Nov2011 | 16119 | 792.15  | -18.5783 | 4 K.SGTIFDNI Splice@chr | 2.09E-10 | 0.006699 |
| 29Nov2011 | 5756  | 1025.62 | -1.90621 | 1 K.LGLGSGL chr5@4945   | 1.22E-11 | 6.95E-04 |
| 29Nov2011 | 3006  | 537.3   | 7.397674 | 2 K.IAENSVEI chr3@1076  | 9.20E-11 | 0.003228 |
| 29Nov2011 | 16387 | 1288.16 | -20.373  | 2 _CTAVSAS Splice@chr   | 1.03E-11 | 6.95E-04 |
| 29Nov2011 | 8392  | 1346.13 | -3.69865 | 2 _QVREMH Splice@chr    | 9.48E-11 | 0.003228 |
| 29Nov2011 | 7356  | 625.82  | -20.2839 | 2 R.K+14.016 chrX@1356  | 1.50E-10 | 0.004906 |
| 29Nov2011 | 1175  | 439.74  | 18.7116  | 2 R.SIAMFGP chr2@4157   | 9.79E-11 | 0.003501 |
| 29Nov2011 | 844   | 464.27  | 6.324078 | 2 _LGTGVDF Splice@chr   | 5.04E-11 | 0.0016   |
| 29Nov2011 | 6618  | 1086.02 | 18.22629 | 2 V.CLTEEGK Splice@chr  | 1.25E-11 | 6.95E-04 |
| 29Nov2011 | 8429  | 762.85  | -15.3018 | 2 G.TSK+14.C chr5@9327  | 1.37E-11 | 6.95E-04 |
| 29Nov2011 | 5469  | 867.42  | 3.24052  | 1 K.SSSGSLSS chr2@1132  | 3.35E-10 | 0.008921 |
| 29Nov2011 | 6621  | 724.35  | 19.12636 | 3 V.CLTEEGK Splice@chr  | 1.65E-11 | 8.61E-04 |
| 29Nov2011 | 11845 | 719.39  | 28.86707 | 2 R.FTQAGSE Splice@chr  | 1.53E-13 | 1.95E-04 |
| 29Nov2011 | 11799 | 719.39  | 28.86707 | 2 R.FTQAGSE Splice@chr  | 4.56E-13 | 3.48E-04 |
| 29Nov2011 | 9918  | 472.29  | -0.64754 | 2 _SPLFVPKI chrX@4402   | 2.69E-10 | 0.007749 |
| 29Nov2011 | 6001  | 866.47  | -13.5535 | 1 R.TTAIGFG, chr1@1378  | 6.61E-12 | 4.50E-04 |
| 29Nov2011 | 79    | 722.35  | 3.723    | 1 R.FQGGGEI chr1@2595   | 3.33E-10 | 0.008738 |
| 29Nov2011 | 19100 | 528.21  | -26.1287 | 2 K.TCEESGA Splice@chr  | 1.87E-10 | 0.005643 |
| 29Nov2011 | 13528 | 1034.58 | 7.238552 | 2 K.FK+14.01 Splice@chr | 7.84E-12 | 5.76E-04 |
| 29Nov2011 | 13124 | 990.5   | -11.7554 | 2 F.RLSESELE chr4@7519  | 1.38E-10 | 0.004319 |
| 29Nov2011 | 309   | 710.36  | -9.42683 | 2 R.NFFDK+1 chr4@1075   | 1.02E-10 | 0.003246 |
| 29Nov2011 | 6770  | 566.31  | 21.45326 | 2 R.EVAQLEC chr5@1706   | 7.48E-11 | 0.002646 |
| 29Nov2011 | 6132  | 1025.62 | -1.90621 | 1 K.LGLGSGL chr5@4945   | 3.50E-11 | 0.001242 |
| 29Nov2011 | 14337 | 1275.61 | -17.5458 | 3 R.YSSECPEI Splice@chr | 2.62E-11 | 8.34E-04 |
| 29Nov2011 | 7562  | 870.57  | 10.89471 | 1 _TPLAKLAI Splice@chr  | 3.40E-10 | 0.008972 |
| 29Nov2011 | 6285  | 677.34  | -8.57314 | 2 K.MQQFSTI chr5@2080   | 3.45E-10 | 0.009329 |
| 29Nov2011 | 8765  | 595.33  | -18.0744 | 3 K.LKLTAKT chr5@9936   | 3.38E-10 | 0.008972 |
| 29Nov2011 | 3464  | 951.5   | -27.6756 | 1 R.KTAIESFR Splice@chr | 1.61E-10 | 0.004417 |
| 29Nov2011 | 6452  | 717.9   | -3.32039 | 2 K.LRGWNK chr3@8881    | 2.03E-10 | 0.005884 |
| 29Nov2011 | 5765  | 868.43  | 10.92162 | 1 K.SSSGSLSS chr2@1132  | 2.89E-10 | 0.008213 |
| 29Nov2011 | 17095 | 988.54  | 1.021401 | 2 _RFFLNFSI chr3@1157   | 2.37E-10 | 0.006828 |
| 29Nov2011 | 17987 | 792.15  | -18.5783 | 4 K.SGTIFDNI Splice@chr | 3.49E-16 | 0        |
| 29Nov2011 | 17914 | 791.9   | -17.5179 | 4 K.SGTIFDNI Splice@chr | 5.18E-13 | 3.48E-04 |
| 29Nov2011 | 4118  | 1073.56 | 20.18419 | 2 L.KIDDFEII chr4@1685  | 6.16E-11 | 0.002007 |

|           |       |         |          |                         |          |          |
|-----------|-------|---------|----------|-------------------------|----------|----------|
| 29Nov2011 | 4174  | 1073.56 | 20.18419 | 2 L.KIDDFEII chr4@1685  | 2.61E-10 | 0.007645 |
| 29Nov2011 | 13288 | 515.29  | -6.17134 | 3 K.PNFTVILS chr4@1642  | 2.47E-10 | 0.00718  |
| 29Nov2011 | 18964 | 963.14  | 25.74479 | 3 _GCSIVPIS Splice@chr  | 9.02E-11 | 0.00312  |
| 29Nov2011 | 12542 | 685.88  | 4.188613 | 2 K.IVPGGGA chrX@1570   | 4.40E-13 | 3.48E-04 |
| 29Nov2011 | 18534 | 1288.15 | -28.1526 | 2 _CTAVSAS Splice@chr   | 3.66E-11 | 0.001365 |
| 29Nov2011 | 8069  | 625.82  | -20.2839 | 2 R.K+14.016 chrX@1356  | 2.69E-10 | 0.007749 |
| 29Nov2011 | 1456  | 439.74  | 18.7116  | 2 R.SIAMFGP chr2@4157   | 9.27E-11 | 0.00312  |
| 29Nov2011 | 18511 | 1288.16 | -20.373  | 2 _CTAVSAS Splice@chr   | 7.67E-11 | 0.002646 |
| 29Nov2011 | 4015  | 446.75  | 3.354779 | 2 R.IFSAGELF chr3@5608  | 1.87E-10 | 0.005533 |
| 29Nov2011 | 6393  | 717.89  | -17.2831 | 2 K.LRGWNK chr3@8881    | 3.09E-10 | 0.00854  |
| 29Nov2011 | 6180  | 1025.62 | -1.90621 | 1 K.LGLGSGL chr5@4945   | 4.86E-11 | 0.001623 |
| 29Nov2011 | 9202  | 1345.63 | -24.7692 | 2 _QVREMH Splice@chr    | 2.67E-10 | 0.007749 |
| 29Nov2011 | 1598  | 439.74  | 18.7116  | 2 R.SIAMFGP chr2@4157   | 4.19E-11 | 0.001694 |
| 29Nov2011 | 6510  | 717.89  | -17.2831 | 2 K.LRGWNK chr3@8881    | 3.22E-10 | 0.008744 |
| 29Nov2011 | 17277 | 1288.16 | -20.373  | 2 _CTAVSAS Splice@chr   | 2.89E-11 | 0.001564 |
| 29Nov2011 | 3351  | 876.41  | -8.50606 | 1 K.TEDEARR chrX@1138   | 4.26E-11 | 0.001694 |
| 29Nov2011 | 2779  | 411.55  | -26.8589 | 3 K.ALQM+1! chr3@1125   | 1.91E-10 | 0.005357 |
| 29Nov2011 | 12652 | 1090.54 | -8.93818 | 2 K.INGVTVA chr3@6296   | 5.36E-11 | 0.00182  |
| 29Nov2011 | 6075  | 1026.62 | -5.1804  | 1 K.LGLGSGL chr5@4945   | 3.22E-11 | 0.001564 |
| 29Nov2011 | 8867  | 1346.13 | -3.69865 | 2 _QVREMH Splice@chr    | 2.51E-10 | 0.006664 |
| 29Nov2011 | 7746  | 625.82  | -20.2839 | 2 R.K+14.016 chrX@1356  | 2.75E-10 | 0.007592 |
| 29Nov2011 | 8796  | 762.85  | -15.3018 | 2 G.TSK+14.C chr5@9327  | 7.21E-11 | 0.002238 |
| 29Nov2011 | 6604  | 566.31  | 21.45326 | 2 R.EVAQLEC chr5@1706   | 1.32E-10 | 0.004339 |
| 29Nov2011 | 11421 | 719.39  | 28.86707 | 2 R.FTQAGSE Splice@chr  | 4.82E-13 | 0        |
| 29Nov2011 | 7414  | 870.57  | 10.89471 | 1 _TPLAKLAI Splice@chr  | 1.37E-10 | 0.004461 |
| 29Nov2011 | 7832  | 625.82  | -20.2839 | 2 R.K+14.016 chrX@1356  | 2.00E-10 | 0.005605 |
| 29Nov2011 | 12517 | 990.5   | -11.7554 | 2 F.RLSESELE chr4@7519  | 2.03E-10 | 0.005605 |
| 29Nov2011 | 17256 | 1288.16 | -20.373  | 2 _CTAVSAS Splice@chr   | 1.12E-10 | 0.003939 |
| 29Nov2011 | 74    | 722.35  | 3.723    | 1 R.FQGGGEI chr1@2595   | 3.33E-10 | 0.009    |
| 29Nov2011 | 7455  | 870.57  | 10.89471 | 1 _TPLAKLAI Splice@chr  | 1.49E-10 | 0.004578 |
| 29Nov2011 | 6658  | 566.31  | 21.45326 | 2 R.EVAQLEC chr5@1706   | 6.13E-11 | 0.002106 |
| 29Nov2011 | 3616  | 537.3   | 7.397674 | 2 K.IAENSVEI chr3@1076  | 6.75E-11 | 0.002238 |
| 29Nov2011 | 16877 | 975.81  | -5.15613 | 3 K.SGTIFDNI Splice@chr | 3.41E-10 | 0.009534 |
| 29Nov2011 | 6003  | 1025.62 | -1.90621 | 1 K.LGLGSGL chr5@4945   | 8.47E-11 | 0.002816 |
| 29Nov2011 | 12604 | 1090.54 | -8.93818 | 2 K.INGVTVA chr3@6296   | 1.03E-10 | 0.003666 |
| 29Nov2011 | 15700 | 1003.52 | 12.6889  | 3 R.CWNRRA Splice@chr   | 2.24E-11 | 0.00128  |
| 29Nov2011 | 10704 | 711.85  | -2.70508 | 2 R.SLHTLFST Splice@chr | 1.26E-10 | 0.0042   |
| 29Nov2011 | 2198  | 934.47  | 6.996328 | 1 _EYQPELR Splice@chr   | 3.61E-10 | 0.009923 |
| 29Nov2011 | 6986  | 724.35  | 19.12636 | 3 V.CLTEEGK Splice@chr  | 7.66E-11 | 0.002525 |
| 29Nov2011 | 6981  | 1086.02 | 18.22629 | 2 V.CLTEEGK Splice@chr  | 1.07E-10 | 0.003939 |
| 29Nov2011 | 14969 | 857.95  | -13.2476 | 2 R.RM+15.9 chr1@1195   | 2.65E-10 | 0.007057 |
| 29Nov2011 | 7554  | 870.57  | 10.89471 | 1 _TPLAKLAI Splice@chr  | 2.65E-10 | 0.007057 |
| 29Nov2011 | 64    | 479.79  | -15.6161 | 2 _KMVSPRI chr1@1106    | 5.08E-11 | 0.00182  |
| 29Nov2011 | 15728 | 792.15  | -18.5783 | 4 K.SGTIFDNI Splice@chr | 3.07E-18 | 0        |
| 29Nov2011 | 15017 | 1198.75 | 9.682211 | 2 R.K+14.016 chr3@5879  | 1.55E-10 | 0.004477 |
| 29Nov2011 | 3195  | 446.75  | 3.354779 | 2 R.IFSAGELF chr3@5608  | 1.93E-10 | 0.00567  |
| 29Nov2011 | 5073  | 868.43  | 10.92162 | 1 K.SSSGSLSS chr2@1132  | 3.02E-10 | 0.009362 |

|           |       |         |          |                          |          |          |
|-----------|-------|---------|----------|--------------------------|----------|----------|
| 29Nov2011 | 5662  | 758.41  | -12.8934 | 2 R.KDK+14.( chr1@9736   | 1.28E-11 | 6.07E-04 |
| 29Nov2011 | 742   | 444.25  | -3.23598 | 2 R.AELSSRPI chr3@8104   | 2.04E-10 | 0.005839 |
| 29Nov2011 | 3351  | 794.43  | -5.96418 | 2 R.TK+14.01 chr1@7238   | 1.84E-10 | 0.00516  |
| 29Nov2011 | 10678 | 1090.54 | -8.93818 | 2 K.INGVTVA chr3@6296    | 1.21E-10 | 0.003834 |
| 29Nov2011 | 15714 | 791.9   | -17.5179 | 4 K.SGTIFDNI Splice@chr  | 1.97E-15 | 0        |
| 29Nov2011 | 4743  | 1141.59 | -5.77929 | 1 K.ENKPSRG Splice@chr   | 2.97E-11 | 0.001174 |
| 29Nov2011 | 3250  | 794.43  | -5.96418 | 2 R.TK+14.01 chr1@7238   | 4.77E-11 | 0.001538 |
| 29Nov2011 | 17056 | 802.41  | 12.28004 | 1 K.RDPNGSF chr2@1095    | 1.33E-10 | 0.00416  |
| 29Nov2011 | 15749 | 792.15  | -18.5783 | 4 K.SGTIFDNI Splice@chr  | 7.28E-15 | 0        |
| 29Nov2011 | 3300  | 794.43  | -5.96418 | 2 R.TK+14.01 chr1@7238   | 1.33E-11 | 6.07E-04 |
| 29Nov2011 | 11176 | 857.96  | -1.56692 | 2 R.RM+15.9 chr1@1195    | 1.75E-10 | 0.004819 |
| 29Nov2011 | 10710 | 515.63  | 4.709014 | 3 K.PNFTVILS chr4@1642   | 2.87E-10 | 0.008863 |
| 29Nov2011 | 6510  | 625.82  | -20.2839 | 2 R.K+14.016 chrX@1356   | 2.20E-10 | 0.006696 |
| 29Nov2011 | 6514  | 765.38  | -12.3766 | 1 R.SPEHAPK chr5@4294    | 1.38E-10 | 0.00416  |
| 29Nov2011 | 10299 | 782.41  | -3.51552 | 3 I.NQSSM+1 chr2@6685    | 1.66E-10 | 0.004477 |
| 29Nov2011 | 5490  | 566.31  | 21.45326 | 2 R.EVAQLEC chr5@1706    | 8.76E-11 | 0.003333 |
| 29Nov2011 | 4784  | 1141.6  | 2.996671 | 1 K.ENKPSRG Splice@chr   | 1.48E-10 | 0.004324 |
| 29Nov2011 | 3146  | 794.43  | -5.96418 | 2 R.TK+14.01 chr1@7238   | 3.79E-11 | 0.001041 |
| 29Nov2011 | 3080  | 446.75  | 3.354779 | 2 R.IFSAGELF chr3@5608   | 1.87E-10 | 0.006528 |
| 29Nov2011 | 4980  | 1161.68 | -2.15604 | 1 K.NSKDKLV chr5@1250    | 7.53E-11 | 0.002824 |
| 29Nov2011 | 4794  | 1025.62 | -1.90621 | 1 K.LGLGSGL chr5@4945    | 2.57E-11 | 0.001041 |
| 29Nov2011 | 4665  | 1141.59 | -5.77929 | 1 K.ENKPSRG Splice@chr   | 2.18E-11 | 8.63E-04 |
| 29Nov2011 | 4633  | 1141.6  | 2.996671 | 1 K.ENKPSRG Splice@chr   | 1.95E-10 | 0.006681 |
| 29Nov2011 | 5245  | 566.31  | 21.45326 | 2 R.EVAQLEC chr5@1706    | 1.76E-10 | 0.006528 |
| 29Nov2011 | 3216  | 1106.57 | -9.7164  | 1 _..SSLDKESC chr5@1235  | 5.14E-11 | 0.00165  |
| 29Nov2011 | 7137  | 1345.63 | -24.7692 | 2 _..QVREMH Splice@chr   | 4.97E-11 | 0.00165  |
| 29Nov2011 | 11622 | 1143.59 | -25.1964 | 2 K.CKKTVDL Splice@chr   | 2.67E-10 | 0.008785 |
| 29Nov2011 | 10281 | 990.5   | -11.7554 | 2 F.RLSESELE chr4@7515   | 2.83E-10 | 0.008785 |
| 29Nov2011 | 3198  | 793.42  | 19.33353 | 2 R.NEKYSTM Splice@chr   | 1.22E-10 | 0.004131 |
| 29Nov2011 | 3097  | 794.43  | -5.96418 | 2 R.TK+14.01 chr1@7238   | 4.57E-11 | 0.001451 |
| 29Nov2011 | 4654  | 867.42  | 3.24052  | 1 K.SSSGSLSS chr2@1132   | 1.84E-10 | 0.006528 |
| 29Nov2011 | 4657  | 1142.6  | 0.055393 | 1 K.ENKPSRG Splice@chr   | 2.02E-10 | 0.006681 |
| 29Nov2011 | 14517 | 792.15  | -18.5783 | 4 K.SGTIFDNI Splice@chr  | 1.76E-10 | 0.006528 |
| 29Nov2011 | 2497  | 537.3   | 7.397674 | 2 K.IAENSVEI chr3@1076   | 2.64E-10 | 0.008785 |
| 29Nov2011 | 7090  | 1345.63 | -24.7692 | 2 _..QVREMH Splice@chr   | 4.53E-11 | 0.001451 |
| 29Nov2011 | 6270  | 625.82  | -11.1921 | 2 I.QLEDIEFIS Splice@chr | 2.45E-10 | 0.007541 |
| 29Nov2011 | 9139  | 990.5   | -11.7554 | 2 F.RLSESELE chr4@7515   | 1.64E-10 | 0.00648  |
| 29Nov2011 | 1894  | 830.42  | -5.08114 | 1 K.YVYG TAR Splice@chr  | 8.44E-11 | 0.004923 |
| 29Nov2011 | 2521  | 626.3   | -9.76097 | 2 R.LCESGAA Splice@chr   | 2.51E-14 | 0        |
| 29Nov2011 | 11193 | 832.2   | 18.72522 | 4 K.FFKDIMV chr3@4692    | 1.97E-10 | 0.00847  |
| 29Nov2011 | 7953  | 1115.1  | 6.276672 | 2 S.LYSSCPE chrX@1175    | 1.42E-10 | 0.006248 |
| 29Nov2011 | 5886  | 739.39  | -23.2367 | 3 K.M+15.99 chr4@1204    | 5.72E-11 | 0.002015 |
| 29Nov2011 | 9752  | 857.95  | -13.2476 | 2 R.RM+15.9 chr1@1195    | 1.04E-10 | 0.003575 |
| 29Nov2011 | 2219  | 793.42  | 19.33353 | 2 R.NEKYSTM Splice@chr   | 5.29E-11 | 0.002015 |
| 29Nov2011 | 3830  | 566.31  | 21.45326 | 2 R.EVAQLEC chr5@1706    | 5.70E-11 | 0.002015 |
| 29Nov2011 | 1408  | 718.34  | -23.3131 | 2 R.WNFHRL chr4@3217     | 6.77E-11 | 0.002653 |
| 29Nov2011 | 1675  | 1183.58 | 13.31613 | 1 K.KCNYSKN chrX@1241    | 9.45E-11 | 0.003281 |

|           |       |         |          |                         |          |          |
|-----------|-------|---------|----------|-------------------------|----------|----------|
| 29Nov2011 | 9462  | 1089.19 | -10.6033 | 3 Q.LMLLQYI chr1@105    | 2.22E-10 | 0.00782  |
| 29Nov2011 | 2202  | 794.43  | -5.96418 | 2 R.TK+14.01 chr1@723   | 3.75E-11 | 0.001743 |
| 29Nov2011 | 10650 | 792.15  | -18.5783 | 4 K.SGTIFDNI Splice@chr | 1.64E-12 | 3.98E-04 |
| 29Nov2011 | 6957  | 752.37  | -29.649  | 2 R.AEEIEEK+ chr2@137   | 1.21E-10 | 0.00388  |
| 29Nov2011 | 4965  | 1034.52 | 26.89942 | 1 K.YNNHINN Splice@chr  | 6.85E-11 | 0.002653 |
| 29Nov2011 | 821   | 545.81  | -0.83904 | 2 K.FPVAAK+ chr3@103    | 1.23E-10 | 0.004199 |
| 29Nov2011 | 105   | 823.42  | -23.1545 | 2 R.KYEEVRY Splice@chr  | 3.21E-13 | 3.98E-04 |
| 29Nov2011 | 2125  | 626.3   | -9.76097 | 2 R.LCESGAA Splice@chr  | 1.50E-15 | 0        |
| 29Nov2011 | 4697  | 1079.58 | 25.35245 | 1 R.FISHFTAE chr4@698   | 2.45E-10 | 0.009026 |
| 29Nov2011 | 9778  | 584.7   | 7.385785 | 5 _TVFYGDL chr4@556     | 1.59E-11 | 0.00103  |
| 29Nov2011 | 9833  | 584.7   | 7.385785 | 5 _TVFYGDL chr4@556     | 7.25E-11 | 0.005008 |
| 29Nov2011 | 6428  | 762.4   | -28.9646 | 3 _AQYK+14 chr1@133     | 5.93E-11 | 0.004699 |
| 29Nov2011 | 3870  | 696.37  | -15.3603 | 2 _LPTSPIGC chr5@120    | 2.14E-10 | 0.009982 |
| 29Nov2011 | 1537  | 626.3   | -9.76097 | 2 R.LCESGAA Splice@chr  | 1.75E-14 | 0        |
| 29Nov2011 | 10166 | 1142.59 | 12.00935 | 2 R.TSM+15.1 chrX@155   | 6.73E-11 | 0.004699 |
| 29Nov2011 | 1558  | 626.3   | -9.76097 | 2 R.LCESGAA Splice@chr  | 1.55E-15 | 0        |
| 29Nov2011 | 1584  | 626.3   | -9.76097 | 2 R.LCESGAA Splice@chr  | 1.35E-15 | 0        |
| 29Nov2011 | 1563  | 626.3   | -9.76097 | 2 R.LCESGAA Splice@chr  | 5.49E-15 | 0        |
| 29Nov2011 | 7645  | 870.57  | 10.89471 | 1 _TPLAKLAI Splice@chr  | 1.55E-10 | 0.00461  |
| 29Nov2011 | 4197  | 794.43  | -5.96418 | 2 R.TK+14.01 chr1@723   | 1.42E-10 | 0.004367 |
| 29Nov2011 | 1060  | 444.25  | -3.23598 | 2 R.AELSSRPI chr3@810   | 1.80E-10 | 0.005109 |
| 29Nov2011 | 8526  | 1034.52 | 26.89942 | 1 K.YNNHINN Splice@chr  | 8.40E-12 | 7.79E-04 |
| 29Nov2011 | 18118 | 968.14  | 24.73951 | 3 _CSIRPISG Splice@chr  | 3.11E-11 | 0.001046 |
| 29Nov2011 | 15096 | 910.99  | -12.6489 | 2 Y.FKNIDKD Splice@chr  | 2.47E-10 | 0.007512 |
| 29Nov2011 | 9280  | 1346.13 | -3.69865 | 2 _QVREMH Splice@chr    | 1.93E-10 | 0.005752 |
| 29Nov2011 | 7738  | 870.57  | 10.89471 | 1 _TPLAKLAI Splice@chr  | 3.04E-10 | 0.008726 |
| 29Nov2011 | 7689  | 870.57  | 10.89471 | 1 _TPLAKLAI Splice@chr  | 1.28E-10 | 0.003992 |
| 29Nov2011 | 12050 | 719.39  | 28.86707 | 2 R.FTQAGSE Splice@chr  | 2.14E-13 | 2.06E-04 |
| 29Nov2011 | 9339  | 1345.63 | -24.7692 | 2 _QVREMH Splice@chr    | 2.58E-10 | 0.007628 |
| 29Nov2011 | 10345 | 782.41  | -3.51552 | 3 I.NQSSM+1 chr2@668    | 8.60E-11 | 0.002247 |
| 29Nov2011 | 7786  | 870.57  | 10.89471 | 1 _TPLAKLAI Splice@chr  | 1.66E-10 | 0.004867 |
| 29Nov2011 | 6208  | 1026.62 | -5.1804  | 1 K.LGLGSGL chr5@494    | 8.83E-12 | 7.79E-04 |
| 29Nov2011 | 7127  | 816.44  | 8.832386 | 1 K.SRGTNIG chr5@140    | 1.30E-11 | 7.79E-04 |
| 29Nov2011 | 19211 | 962.8   | 19.96909 | 3 _GCSIVPIS Splice@chr  | 5.31E-11 | 0.001302 |
| 29Nov2011 | 18186 | 791.9   | -17.5179 | 4 K.SGTIFDNI Splice@chr | 3.63E-12 | 5.00E-04 |
| 29Nov2011 | 18185 | 1055.54 | -8.72034 | 3 K.SGTIFDNI Splice@chr | 6.32E-13 | 5.00E-04 |
| 29Nov2011 | 1720  | 401.74  | 27.30093 | 2 R.IEAGGGC chr5@877    | 1.03E-12 | 5.00E-04 |
| 29Nov2011 | 16888 | 1072.56 | -18.7756 | 2 R.YFFLIKNY chr5@179   | 2.08E-10 | 0.00626  |
| 29Nov2011 | 9016  | 1173.17 | -9.30319 | 3 K.PTMRTCC Splice@chr  | 2.05E-10 | 0.00626  |
| 29Nov2011 | 2534  | 484.74  | 15.01511 | 2 K.FSEKLESE Splice@chr | 2.70E-10 | 0.007994 |
| 29Nov2011 | 62    | 722.35  | 3.723    | 1 R.FQGGGEI chr1@259    | 3.33E-10 | 0.009691 |
| 29Nov2011 | 4498  | 816.93  | -8.79362 | 2 F.FHFRNAS chr4@940    | 3.38E-10 | 0.009814 |
| 29Nov2011 | 18711 | 1288.15 | -28.1526 | 2 _CTAVSAS Splice@chr   | 3.09E-11 | 0.001046 |
| 29Nov2011 | 6373  | 1025.62 | -1.90621 | 1 K.LGLGSGL chr5@494    | 4.25E-11 | 0.001161 |
| 29Nov2011 | 5671  | 503.79  | 14.81039 | 2 K.FSLLTPN Splice@chr  | 8.71E-11 | 0.002247 |
| 29Nov2011 | 6310  | 1025.62 | -1.90621 | 1 K.LGLGSGL chr5@494    | 2.35E-11 | 9.08E-04 |
| 29Nov2011 | 16393 | 1094.04 | 9.079267 | 2 R.SCSFFFNI chrX@848   | 2.39E-10 | 0.007401 |

|           |       |         |          |                         |          |          |
|-----------|-------|---------|----------|-------------------------|----------|----------|
| 29Nov2011 | 9233  | 1345.63 | -24.7692 | 2 _QVREMH Splice@chr    | 1.33E-10 | 0.004109 |
| 29Nov2011 | 7422  | 975.56  | -2.75567 | 1 K.LPKLDAYI chr4@1149  | 3.81E-11 | 0.001161 |
| 29Nov2011 | 5762  | 544.63  | -27.4692 | 3 R.VVITSSD( Splice@chr | 9.37E-11 | 0.002517 |
| 29Nov2011 | 13419 | 1090.54 | -8.93818 | 2 K.INGVTVA chr3@6296   | 1.48E-10 | 0.004493 |
| 29Nov2011 | 2907  | 411.55  | -26.8589 | 3 K.ALQM+1! chr3@1125   | 2.45E-10 | 0.007512 |
| 29Nov2011 | 4252  | 794.43  | -5.96418 | 2 R.TK+14.01 chr1@7238  | 1.12E-10 | 0.003322 |
| 29Nov2011 | 1628  | 439.74  | 18.7116  | 2 R.SIAMFGP chr2@4157   | 7.54E-11 | 0.001983 |
| 29Nov2011 | 558   | 710.36  | -9.42683 | 2 R.NFFDK+1 chr4@1075   | 1.98E-10 | 0.005881 |
| 29Nov2011 | 9392  | 1345.63 | -24.7692 | 2 _QVREMH Splice@chr    | 1.12E-10 | 0.003322 |
| 29Nov2011 | 9396  | 1345.13 | -23.5213 | 2 _QVREMH Splice@chr    | 2.27E-10 | 0.007156 |
| 29Nov2011 | 13384 | 1090.54 | -8.93818 | 2 K.INGVTVA chr3@6296   | 2.00E-10 | 0.006011 |
| 29Nov2011 | 18240 | 963.14  | 21.93704 | 3 _CSIRPISG Splice@chr  | 5.90E-12 | 1.74E-04 |
| 29Nov2011 | 5316  | 437.23  | 15.48445 | 3 R.VMLMIS( chr2@5842   | 2.02E-10 | 0.004868 |
| 29Nov2011 | 11166 | 719.39  | 28.86707 | 2 R.FTQAGSE Splice@chr  | 1.74E-13 | 0        |
| 29Nov2011 | 5539  | 1025.62 | -1.90621 | 1 K.LGLGSGL chr5@4945   | 3.08E-11 | 7.89E-04 |
| 29Nov2011 | 17879 | 1287.65 | -26.8489 | 2 _CTAVSAS Splice@chr   | 2.65E-10 | 0.006472 |
| 29Nov2011 | 8288  | 1173.17 | -9.30319 | 3 K.PTMRTC( Splice@chr  | 2.16E-10 | 0.005422 |
| 29Nov2011 | 6587  | 639.65  | -12.525  | 3 R.NLM+15. chr1@5405   | 1.74E-10 | 0.004736 |
| 29Nov2011 | 17905 | 1287.65 | -26.8489 | 2 _CTAVSAS Splice@chr   | 2.93E-10 | 0.007129 |
| 29Nov2011 | 4722  | 474.25  | -28.3486 | 3 K.WMFSGP chr4@6312    | 1.98E-10 | 0.004868 |
| 29Nov2011 | 8520  | 1345.63 | -24.7692 | 2 _QVREMH Splice@chr    | 1.37E-10 | 0.003957 |
| 29Nov2011 | 8465  | 1345.63 | -24.7692 | 2 _QVREMH Splice@chr    | 4.29E-11 | 9.39E-04 |
| 29Nov2011 | 1942  | 430.73  | -12.6409 | 2 K.TLDWGLI chr5@1381   | 2.17E-10 | 0.005422 |
| 29Nov2011 | 3563  | 794.43  | -5.96418 | 2 R.TK+14.01 chr1@7238  | 2.77E-11 | 7.89E-04 |
| 29Nov2011 | 17299 | 989.53  | -24.3686 | 2 N.FRLLVIFS chr1@1191  | 4.70E-11 | 0.001085 |
| 29Nov2011 | 2202  | 411.55  | -26.8589 | 3 K.ALQM+1! chr3@1125   | 1.16E-10 | 0.002968 |
| 29Nov2011 | 50    | 722.35  | 3.723    | 1 R.FQGGGEI chr1@2595   | 3.33E-10 | 0.008296 |
| 29Nov2011 | 15620 | 834.44  | -21.0656 | 2 _KYLFFVEF chr3@1094   | 2.94E-10 | 0.007129 |
| 29Nov2011 | 14865 | 1216.59 | -11.6275 | 2 L.RNTRNDI chr4@1012   | 2.25E-10 | 0.005557 |
| 29Nov2011 | 3620  | 794.43  | -5.96418 | 2 R.TK+14.01 chr1@7238  | 1.11E-10 | 0.002968 |
| 29Nov2011 | 3624  | 1073.56 | 20.18419 | 2 L.KIDDFEII chr4@1685  | 1.62E-10 | 0.004501 |
| 29Nov2011 | 17875 | 1288.16 | -20.373  | 2 _CTAVSAS Splice@chr   | 3.49E-10 | 0.008817 |
| 29Nov2011 | 8629  | 1345.63 | -24.7692 | 2 _QVREMH Splice@chr    | 3.25E-10 | 0.008296 |
| 29Nov2011 | 3568  | 1073.56 | 20.18419 | 2 L.KIDDFEII chr4@1685  | 2.63E-10 | 0.006345 |
| 29Nov2011 | 17513 | 933.97  | -6.38077 | 2 L.FLCVFFVS chr2@8497  | 2.62E-10 | 0.006925 |
| 29Nov2011 | 6462  | 1025.62 | -1.90621 | 1 K.LGLGSGL chr5@4945   | 7.15E-12 | 7.58E-04 |
| 29Nov2011 | 15410 | 1275.61 | -17.5458 | 3 R.YSSECPE( Splice@chr | 7.33E-12 | 7.58E-04 |
| 29Nov2011 | 8716  | 565.83  | 14.11658 | 2 R.ISLTNANI chr5@7795  | 2.35E-10 | 0.006366 |
| 29Nov2011 | 7920  | 870.57  | 10.89471 | 1 _TPLAKLAI Splice@chr  | 1.31E-10 | 0.004013 |
| 29Nov2011 | 19189 | 792.16  | -5.99938 | 4 K.SGTIFDNI Splice@chr | 2.71E-13 | 1.88E-04 |
| 29Nov2011 | 7420  | 724.35  | 19.12636 | 3 V.CLTEEGK Splice@chr  | 1.24E-10 | 0.003892 |
| 29Nov2011 | 7873  | 870.57  | 10.89471 | 1 _TPLAKLAI Splice@chr  | 1.47E-10 | 0.004752 |
| 29Nov2011 | 6520  | 1025.62 | -1.90621 | 1 K.LGLGSGL chr5@4945   | 1.27E-11 | 8.95E-04 |
| 29Nov2011 | 12260 | 719.39  | 28.86707 | 2 R.FTQAGSE Splice@chr  | 1.32E-13 | 0        |
| 29Nov2011 | 1630  | 464.27  | 6.324078 | 2 _LGTGVDF Splice@chr   | 3.56E-10 | 0.009211 |
| 29Nov2011 | 15774 | 756.89  | 1.614941 | 2 _FTEITNEV Splice@chr  | 3.23E-10 | 0.008525 |
| 29Nov2011 | 10387 | 515.62  | 14.07456 | 3 _QNLSLFF( Splice@chr  | 2.02E-10 | 0.005772 |

|           |       |         |          |                         |          |          |
|-----------|-------|---------|----------|-------------------------|----------|----------|
| 29Nov2011 | 3577  | 876.41  | -8.50606 | 1 K.TEDEARR chrX@1138   | 8.53E-11 | 0.003016 |
| 29Nov2011 | 11161 | 671.37  | -24.0361 | 2 T.FNIVHTQ Splice@chr  | 3.70E-10 | 0.009918 |
| 29Nov2011 | 7976  | 870.57  | 10.89471 | 1 _.TPLAKLAI Splice@chr | 1.87E-10 | 0.005688 |
| 29Nov2011 | 6939  | 717.89  | -17.2831 | 2 K.LRGWKN chr3@8881    | 2.06E-10 | 0.005772 |
| 29Nov2011 | 12832 | 1040.53 | -29.1053 | 2 V.IFSKINKN chr5@1728  | 3.52E-10 | 0.009105 |
| 29Nov2011 | 9119  | 653.37  | -8.42035 | 2 K.FHKISRTF chr5@1859  | 3.08E-10 | 0.007838 |
| 29Nov2011 | 9778  | 793.94  | 24.63228 | 2 K.WAERIAI chr3@1297   | 2.66E-10 | 0.00806  |
| 29Nov2011 | 9854  | 793.94  | 24.63228 | 2 K.WAERIAI chr3@1297   | 2.43E-10 | 0.007158 |
| 29Nov2011 | 11975 | 793.94  | 24.63228 | 2 K.WAERIAI chr3@1297   | 3.67E-11 | 0.001405 |
| 29Nov2011 | 10292 | 793.94  | 24.63228 | 2 K.WAERIAI chr3@1297   | 3.91E-11 | 0.00222  |
| 29Nov2011 | 8627  | 793.94  | 24.63228 | 2 K.WAERIAI chr3@1297   | 2.15E-10 | 0.009025 |
| 29Nov2011 | 7436  | 793.94  | 24.63228 | 2 K.WAERIAI chr3@1297   | 8.58E-12 | 7.37E-04 |
| 29Nov2011 | 14762 | 1203.97 | 12.40103 | 3 _.VIWESRR Splice@chr  | 1.45E-10 | 0.005638 |
| 24Mar2011 | 5132  | 792.9   | -12.2226 | 2 K.SKWDQA chr4@4195    | 3.39E-10 | 0.006357 |
| 24Mar2011 | 18406 | 773.93  | -7.73868 | 2 R.VLQM+1' Splice@chr  | 6.50E-11 | 0.002597 |
| 29Nov2011 | 2193  | 611.32  | -14.7611 | 2 K.KNIRSCRI chrX@1576  | 1.21E-10 | 0.006248 |
| 29Nov2011 | 3861  | 473.25  | 9.317929 | 2 K.NIDGDAI chrX@3025   | 8.64E-11 | 0.00312  |
| 29Nov2011 | 6821  | 473.25  | 9.317929 | 2 K.NIDGDAI chrX@3025   | 8.95E-11 | 0.003333 |
| 24Mar2011 | 1390  | 539.33  | -21.5032 | 2 _.LITLAAAL chr5@2203  | 5.27E-10 | 0.008398 |
| 24Mar2011 | 2926  | 446.73  | -28.8925 | 2 K.TIFTGPEK chr5@4766  | 3.35E-10 | 0.005141 |
| 29Nov2011 | 13727 | 935.53  | 16.87109 | 1 R.LKNPGSY chr4@1322   | 1.36E-10 | 0.002763 |
| 29Nov2011 | 7022  | 973.51  | 16.88298 | 2 R.QFAEFW' chr3@1135   | 1.68E-10 | 0.00716  |
| 29Nov2011 | 12176 | 517.3   | -19.4845 | 4 R.KEQVEIKI chrX@9761  | 3.18E-10 | 0.008642 |
| 24Mar2011 | 7371  | 631.37  | 6.15506  | 2 R.VQITVTKI chr2@1218  | 4.02E-10 | 0.003979 |
| 29Nov2011 | 2177  | 672.82  | -0.63596 | 2 _.HQLTEAS Splice@chr  | 3.87E-11 | 0.002119 |
| 29Nov2011 | 1652  | 672.82  | -0.63596 | 2 _.HQLTEAS Splice@chr  | 5.62E-11 | 0.001557 |
| 29Nov2011 | 1755  | 672.82  | -0.63596 | 2 _.HQLTEAS Splice@chr  | 2.36E-11 | 0.001166 |
| 29Nov2011 | 2125  | 672.82  | -0.63596 | 2 _.HQLTEAS Splice@chr  | 1.83E-11 | 7.16E-04 |
| 29Nov2011 | 2083  | 672.82  | -0.63596 | 2 _.HQLTEAS Splice@chr  | 6.83E-12 | 4.50E-04 |
| 29Nov2011 | 2180  | 672.82  | -0.63596 | 2 _.HQLTEAS Splice@chr  | 2.83E-11 | 8.34E-04 |
| 29Nov2011 | 2147  | 672.82  | -0.63596 | 2 _.HQLTEAS Splice@chr  | 2.32E-12 | 3.65E-04 |
| 29Nov2011 | 2197  | 672.82  | -0.63596 | 2 _.HQLTEAS Splice@chr  | 4.60E-12 | 5.10E-04 |
| 29Nov2011 | 2326  | 672.82  | -0.63596 | 2 _.HQLTEAS Splice@chr  | 4.02E-12 | 5.00E-04 |
| 29Nov2011 | 2233  | 672.82  | -0.63596 | 2 _.HQLTEAS Splice@chr  | 1.92E-12 | 5.00E-04 |
| 29Nov2011 | 2280  | 672.82  | -0.63596 | 2 _.HQLTEAS Splice@chr  | 2.66E-13 | 2.06E-04 |
| 29Nov2011 | 2375  | 672.82  | -0.63596 | 2 _.HQLTEAS Splice@chr  | 1.96E-11 | 9.08E-04 |
| 29Nov2011 | 2476  | 672.82  | -0.63596 | 2 _.HQLTEAS Splice@chr  | 3.18E-11 | 0.001161 |
| 29Nov2011 | 2436  | 672.82  | -0.63596 | 2 _.HQLTEAS Splice@chr  | 5.80E-11 | 0.001428 |
| 29Nov2011 | 2510  | 672.82  | -0.63596 | 2 _.HQLTEAS Splice@chr  | 1.24E-10 | 0.003892 |
| 24Mar2011 | 2317  | 494.24  | -5.44813 | 2 R.RATHCW Splice@chr   | 5.95E-10 | 0.009719 |
| 24Mar2011 | 4577  | 522.27  | 2.419888 | 3 R.TLCSPRLS chr2@1169  | 1.17E-10 | 0.003279 |
| 24Mar2011 | 2961  | 522.27  | 2.419888 | 3 R.TLCSPRLS chr2@1169  | 2.76E-10 | 0.007579 |
| 29Nov2011 | 11498 | 833.46  | -21.6039 | 2 R.RRVK+14 chr2@2138   | 1.83E-10 | 0.005408 |
| 29Nov2011 | 11731 | 833.46  | -21.6039 | 2 R.RRVK+14 chr2@2138   | 2.10E-10 | 0.00626  |
| 29Nov2011 | 11781 | 833.46  | -21.6039 | 2 R.RRVK+14 chr2@2138   | 4.64E-11 | 0.001161 |
| 29Nov2011 | 11946 | 833.47  | -9.64586 | 2 R.RRVK+14 chr2@2138   | 1.44E-10 | 0.004752 |
| 24Mar2011 | 22630 | 600.31  | -25.2566 | 2 K.TYSISLGG chr5@2080  | 3.74E-10 | 0.008174 |

|            |       |         |          |                         |          |          |
|------------|-------|---------|----------|-------------------------|----------|----------|
| 26July2011 | 5101  | 707.04  | 0        | 3 R.K+14.016 chr1@9378  | 1.71E-10 | 0.006354 |
| 24Mar2011  | 8908  | 898.84  | 5.463969 | 3 K.ICNKKNIC chr4@1270  | 1.14E-11 | 2.68E-04 |
| 24Mar2011  | 8845  | 898.84  | 5.463969 | 3 K.ICNKKNIC chr4@1270  | 4.40E-11 | 5.38E-04 |
| 24Mar2011  | 9281  | 898.84  | 5.463969 | 3 K.ICNKKNIC chr4@1270  | 1.44E-11 | 4.91E-04 |
| 24Mar2011  | 8072  | 898.83  | -5.68906 | 3 K.ICNKKNIC chr4@1270  | 1.27E-10 | 0.002441 |
| 24Mar2011  | 5689  | 792.9   | 20.81071 | 2 K.QKYSENN chr5@1758   | 5.62E-10 | 0.008005 |
| 29Nov2011  | 435   | 422.89  | 27.75355 | 3 K.ECSGISLK chr2@1146  | 1.06E-10 | 0.003371 |
| 24Mar2011  | 9575  | 1006.2  | 9.901445 | 3 R.ANTYTRL chr1@9940   | 3.56E-10 | 0.00962  |
| 26July2011 | 2525  | 575.8   | -3.47818 | 4 R.ISK+14.0: chrX@9524 | 8.05E-11 | 0.004325 |
| 29Nov2011  | 21071 | 1128.62 | -7.7452  | 1 K.IFWFSGK chr5@5121   | 1.11E-10 | 0.003366 |
| 29Nov2011  | 15464 | 1157.61 | -23.5354 | 2 N.K+14.016 chr4@1061  | 2.50E-11 | 9.08E-04 |
| 24Mar2011  | 5812  | 627.8   | -20.4488 | 2 K.SSLTSTSS Splice@chr | 5.35E-11 | 0.00128  |
| 24Mar2011  | 8679  | 1109.26 | 26.46289 | 3 S.DAFCSQM chr5@7574   | 5.97E-10 | 0.009933 |
| 26July2011 | 3453  | 508.27  | -0.3598  | 3 K.FQKDESV Splice@chr  | 4.56E-13 | 0        |
| 24Mar2011  | 171   | 544.77  | -11.6735 | 2 R.KNQEERE chr4@4053   | 2.89E-10 | 0.003949 |
| 24Mar2011  | 597   | 559.35  | 16.83479 | 2 _K+14.016 chr5@1089   | 4.98E-10 | 0.007774 |
| 29Nov2011  | 8273  | 662.35  | -25.3505 | 2 K.TFQVRW chr2@7159    | 1.53E-10 | 0.004612 |
| 24Mar2011  | 9221  | 430.89  | 17.9529  | 3 K.VDSFFRN chr5@1799   | 3.27E-10 | 0.006616 |
| 24Mar2011  | 897   | 643.89  | -11.5825 | 2 _QVAITQI Splice@chr   | 5.09E-11 | 0.001358 |
| 24Mar2011  | 612   | 643.89  | -11.5825 | 2 _QVAITQI Splice@chr   | 2.75E-10 | 0.003197 |
| 24Mar2011  | 6654  | 456.74  | 15.60282 | 2 K.FERADFK chr5@1813   | 4.25E-10 | 0.006312 |
| 24Mar2011  | 11510 | 834.39  | -11.8644 | 2 R.QVENMT chr5@1128    | 2.59E-10 | 0.005926 |
| 24Mar2011  | 2925  | 636.34  | 11.68333 | 2 R.QILSQMY chrX@1166   | 1.83E-10 | 0.001974 |
| 29Nov2011  | 3210  | 617.41  | -9.66032 | 2 K.TRKFAILK chr2@3269  | 2.53E-10 | 0.006664 |
| 24Mar2011  | 13862 | 1158.28 | -14.7532 | 3 K.SEK+14.0 chr1@1393  | 2.50E-10 | 0.003029 |
| 24Mar2011  | 3287  | 470.24  | -12.7585 | 2 R.ENHAQIA chr3@1718   | 1.40E-10 | 0.003449 |
| 24Mar2011  | 18143 | 914.5   | -20.7559 | 2 R.LELK+14. chr2@3096  | 2.38E-10 | 0.005771 |
| 24Mar2011  | 2127  | 558.3   | -13.909  | 2 R.FVFMVFI chr3@3158   | 3.10E-11 | 3.29E-04 |
| 24Mar2011  | 2764  | 935.55  | 7.651866 | 1 _QVVTKT chr1@6787     | 5.70E-11 | 0.003313 |
| 24Mar2011  | 2800  | 935.55  | 7.651866 | 1 _QVVTKT chr1@6787     | 6.95E-11 | 0.00382  |
| 24Mar2011  | 2469  | 935.55  | 7.651866 | 1 _QVVTKT chr1@6787     | 1.06E-10 | 0.00433  |
| 24Mar2011  | 2503  | 935.55  | 7.651866 | 1 _QVVTKT chr1@6787     | 8.27E-11 | 0.003811 |
| 24Mar2011  | 3000  | 935.55  | 7.651866 | 1 _QVVTKT chr1@6787     | 4.56E-11 | 0        |
| 24Mar2011  | 2963  | 935.55  | 7.651866 | 1 _QVVTKT chr1@6787     | 4.54E-11 | 0        |
| 24Mar2011  | 2260  | 935.55  | 7.651866 | 1 _QVVTKT chr1@6787     | 1.24E-10 | 0.008031 |
| 24Mar2011  | 2300  | 935.55  | 7.651866 | 1 _QVVTKT chr1@6787     | 4.54E-11 | 0.003978 |
| 24Mar2011  | 2556  | 935.55  | 7.651866 | 1 _QVVTKT chr1@6787     | 9.32E-11 | 0.004479 |
| 26July2011 | 111   | 618.32  | -22.6742 | 3 R.ISNWTK+ chr4@1094   | 3.10E-10 | 0.003436 |
| 24Mar2011  | 9254  | 757.41  | -6.93941 | 2 _GSDLLAG Splice@chr   | 1.95E-11 | 2.68E-04 |
| 29Nov2011  | 11123 | 799.68  | 20.20162 | 4 K.KSNYSSA chr2@1416   | 9.37E-11 | 0.006697 |
| 24Mar2011  | 6879  | 783.45  | -6.98459 | 2 K.KK+14.01 chr1@1075  | 5.78E-10 | 0.009117 |
| 26July2011 | 6074  | 591.31  | 13.40323 | 2 K.FFSLIDLY chr2@8740  | 7.32E-11 | 0.006441 |
| 24Mar2011  | 13138 | 979.53  | -23.938  | 3 K.KEISSLLM chr2@1417  | 2.48E-10 | 0.002445 |
| 24Mar2011  | 9014  | 432.22  | -16.6659 | 3 R.GCTPNFT chr1@9224   | 2.94E-11 | 4.23E-04 |
| 29Nov2011  | 17094 | 1190.14 | 0.642767 | 2 _EEKRVLT Splice@chr   | 6.74E-11 | 0.002935 |
| 24Mar2011  | 853   | 437.25  | 2.568654 | 3 K.PKPNPNF chr5@1674   | 3.47E-10 | 0.005236 |
| 24Mar2011  | 6034  | 463.25  | -27.992  | 2 K.KMGYVSI chrX@4589   | 1.17E-10 | 0.003802 |

|            |       |         |          |                           |          |          |
|------------|-------|---------|----------|---------------------------|----------|----------|
| 24Mar2011  | 1603  | 433.72  | 9.958328 | 2 K.MSKGGG chr2@1328      | 1.60E-10 | 0.001938 |
| 24Mar2011  | 14850 | 782.59  | -22.9272 | 5 K.KFTQIQN chr3@7095     | 2.90E-10 | 0.004032 |
| 29Nov2011  | 17492 | 848.48  | 13.70279 | 1 _ .RHGQPPI Splice@chr   | 2.65E-10 | 0.007759 |
| 24Mar2011  | 6697  | 431.76  | 14.45303 | 2 K.KNTGTTL chr5@4992     | 1.96E-10 | 0.003484 |
| 24Mar2011  | 8026  | 984.95  | -7.13354 | 2 K.RNCQEM chr5@1871      | 5.81E-11 | 9.37E-04 |
| 26July2011 | 1553  | 601.38  | 0.813298 | 3 R.LFIITSLN chr5@1564    | 1.44E-10 | 0.007072 |
| 24Mar2011  | 4274  | 496.78  | -27.33   | 2 K.RAKLYWf chr2@7001     | 1.88E-10 | 0.002987 |
| 26July2011 | 1250  | 677.36  | 17.72759 | 3 K.K+14.016 Splice@chr   | 2.10E-10 | 0.008718 |
| 24Mar2011  | 467   | 420.22  | -6.16669 | 3 R.TAMQIFL chr5@1875     | 3.83E-10 | 0.009581 |
| 29Nov2011  | 825   | 545.3   | 12.29243 | 2 R.WRGGGN chr5@1991      | 5.02E-11 | 0.001142 |
| 29Nov2011  | 1139  | 544.8   | 15.3771  | 2 R.WRGGGN chr5@1991      | 1.46E-10 | 0.005638 |
| 26July2011 | 5288  | 638.93  | -6.35298 | 5 K.K+14.016 chr1@1295    | 1.35E-10 | 0.00721  |
| 29Nov2011  | 2099  | 1018.53 | -10.6855 | 1 R.RAQAKC Splice@chr     | 1.40E-10 | 0.004255 |
| 24Mar2011  | 1979  | 561.31  | -16.0798 | 2 R.FETFK+14 chr2@1215    | 1.04E-10 | 0.00681  |
| 24Mar2011  | 9909  | 803.41  | -26.2419 | 2 _ .FSWKLLD chr3@6086    | 4.62E-10 | 0.007235 |
| 26July2011 | 9716  | 438.28  | -5.58323 | 3 K.PRLAK+14 chr5@7020    | 6.14E-11 | 0.002441 |
| 29Nov2011  | 16410 | 1044.88 | -17.994  | 3 K.FYFSIIVN chr3@9854    | 3.57E-10 | 0.009081 |
| 24Mar2011  | 9071  | 889.47  | -22.5782 | 2 R.KMEK+14 chr4@9722     | 1.41E-10 | 0.001588 |
| 24Mar2011  | 720   | 593.86  | 1.701956 | 2 R.K+14.016 chr5@1057    | 3.58E-10 | 0.004619 |
| 24Mar2011  | 612   | 593.86  | 1.701956 | 2 R.K+14.016 chr5@1057    | 1.40E-10 | 0.001629 |
| 24Mar2011  | 16658 | 620.56  | -25.9923 | 4 K.LGCSSPA Splice@chr    | 6.19E-10 | 0.007689 |
| 26July2011 | 4332  | 672.35  | -26.9708 | 3 _ .KAK+14.016 chr2@5535 | 2.17E-10 | 0.009305 |
| 24Mar2011  | 3576  | 749.9   | 7.626905 | 2 K.KSSRAGS Splice@chr    | 2.61E-10 | 0.005862 |
| 26July2011 | 1753  | 600.34  | 8.716363 | 2 R.REKADFY Splice@chr    | 3.68E-11 | 0.002436 |
| 26July2011 | 1931  | 623.32  | 14.7746  | 2 R.SKCHQCF Splice@chr    | 2.03E-10 | 0.005663 |
| 29Nov2011  | 9124  | 707.39  | 9.331858 | 2 _ .PTGTLAD chr3@9118    | 9.70E-11 | 0.002925 |
| 26July2011 | 2464  | 568.65  | -28.2217 | 3 _ .K+14.016 chr5@4680   | 1.04E-10 | 0.005567 |
| 29Nov2011  | 13017 | 761.74  | 29.20535 | 3 _ .LMKGGQ Splice@chr    | 2.04E-10 | 0.004145 |
| 29Nov2011  | 4364  | 620.83  | -20.0532 | 2 F.QYELATIF chrX@1616    | 2.37E-10 | 0.006643 |
| 29Nov2011  | 4309  | 620.83  | -20.0532 | 2 F.QYELATIF chrX@1616    | 1.80E-10 | 0.004841 |
| 29Nov2011  | 4344  | 620.83  | -20.0532 | 2 F.QYELATIF chrX@1616    | 1.95E-10 | 0.00376  |
| 26July2011 | 1015  | 419.27  | 27.43477 | 4 K.LNFPIGN chrX@1761     | 1.45E-10 | 0.005858 |
| 26July2011 | 455   | 468.58  | -22.6258 | 3 K.WWKHA chrX@1661       | 1.75E-10 | 0.009013 |
| 29Nov2011  | 12593 | 598.31  | -1.56683 | 3 K.MFLVSITI chrX@2972    | 2.95E-10 | 0.009137 |
| 26July2011 | 7209  | 663.75  | -8.71824 | 3 R.KPLELVQ chrX@2798     | 6.97E-11 | 0.002556 |
| 29Nov2011  | 4245  | 746.41  | -19.019  | 1 K.KAGGVD Splice@chr     | 3.65E-11 | 0.001361 |
| 24Mar2011  | 8163  | 481.77  | 18.8751  | 2 K.NFLSDPLI chrX@7775    | 1.35E-10 | 0.002571 |
| 24Mar2011  | 19988 | 783.47  | -18.0966 | 2 K.RDRTVGC Splice@chr    | 2.29E-11 | 4.23E-04 |
| 29Nov2011  | 12337 | 703.71  | -6.36953 | 3 K.NGLNSLE chr1@3647     | 1.27E-10 | 0.005542 |
| 26July2011 | 3107  | 468.92  | 1.5653   | 3 K.IQKWAN chrX@1563      | 8.23E-11 | 0.003523 |
| 24Mar2011  | 1086  | 600.41  | 20.1621  | 2 K.KVILKNPF chr1@3022    | 3.78E-10 | 0.00823  |
| 26July2011 | 8263  | 596.97  | -21.0969 | 3 R.TSCLTTGI chr5@1606    | 3.30E-12 | 0        |
| 29Nov2011  | 12493 | 1049.53 | -13.481  | 2 K.K+14.016 chrX@1366    | 1.90E-10 | 0.004736 |
| 26July2011 | 1698  | 443.24  | -20.5779 | 3 R.SPIADKK chr5@4774     | 1.92E-10 | 0.004551 |
| 24Mar2011  | 9695  | 1172.16 | 11.0486  | 2 K.K+14.016 Splice@chr   | 3.67E-10 | 0.00962  |
| 26July2011 | 3353  | 589.56  | -14.3109 | 4 R.FPSIFLEF chr5@1556    | 1.29E-10 | 0.005892 |
| 29Nov2011  | 10535 | 550.35  | 25.52472 | 2 R.RRALPSSI chr4@2567    | 1.72E-10 | 0.006202 |

|            |       |         |          |                         |          |          |
|------------|-------|---------|----------|-------------------------|----------|----------|
| 24Mar2011  | 13349 | 675.35  | -28.6783 | 4 K.SEITEIK+ chrX@919   | 3.80E-11 | 0.002517 |
| 24Mar2011  | 4350  | 877.43  | -25.813  | 3 R.DKSSTAE chrX@173    | 6.03E-11 | 0.00578  |
| 24Mar2011  | 4971  | 800.88  | -7.93578 | 2 K.LM+15.9 chr5@121    | 2.32E-10 | 0.005183 |
| 24Mar2011  | 455   | 530.31  | -14.4139 | 2 R.KKERNEK chr3@112    | 4.00E-10 | 0.007535 |
| 24Mar2011  | 9868  | 1003.07 | 18.19201 | 2 R.KITILSRDI chr4@831  | 4.98E-10 | 0.00899  |
| 24Mar2011  | 7113  | 876.43  | -6.39266 | 3 G.WSNLNN chrX@211     | 5.35E-10 | 0.009308 |
| 24Mar2011  | 9935  | 876.43  | -6.39266 | 3 G.WSNLNN chrX@211     | 5.88E-10 | 0.007863 |
| 24Mar2011  | 8013  | 876.43  | -6.39266 | 3 G.WSNLNN chrX@211     | 2.14E-10 | 0.001974 |
| 26July2011 | 3036  | 689.37  | -25.7128 | 4 K.NSNCGR chr2@661     | 1.13E-10 | 0.009694 |
| 29Nov2011  | 11763 | 960.82  | -27.2036 | 3 _SIESLDRG chr2@132    | 1.67E-10 | 0.003148 |
| 29Nov2011  | 7546  | 420.97  | -10.682  | 4 R.MENVTSI chrX@700    | 1.14E-10 | 0.007835 |
| 24Mar2011  | 5800  | 869.95  | -25.3563 | 2 K.SFCNLRK chr4@578    | 7.40E-11 | 0.001753 |
| 24Mar2011  | 15989 | 814.47  | 24.08564 | 2 K.FFIKYDLF chrX@128   | 4.22E-10 | 0.00627  |
| 24Mar2011  | 12314 | 814.47  | 24.08564 | 2 K.FFIKYDLF chrX@128   | 6.48E-10 | 0.00811  |
| 26July2011 | 8034  | 670.41  | -17.7795 | 2 R.MKHK+1 chrX@112     | 3.53E-11 | 0.002894 |
| 26July2011 | 878   | 660.35  | -17.5879 | 3 K.IENFRFSN chr3@133   | 8.74E-11 | 0.006526 |
| 26July2011 | 6908  | 766.73  | -25.0812 | 3 K.EINKSKLC chrX@719   | 1.99E-10 | 0.007685 |
| 29Nov2011  | 2227  | 681.86  | -10.0011 | 2 R.DRK+14 chr1@495     | 2.08E-10 | 0.005944 |
| 29Nov2011  | 18469 | 1277.59 | -5.83296 | 1 K.ETQQDT chrX@138     | 2.05E-10 | 0.00563  |
| 29Nov2011  | 4293  | 781.42  | 9.854415 | 2 R.K+14.016 chr5@159   | 2.16E-10 | 0.007524 |
| 29Nov2011  | 11464 | 826.44  | -27.4106 | 2 K.YQILQLM chr4@312    | 2.03E-10 | 0.00563  |
| 29Nov2011  | 11074 | 826.44  | -27.4106 | 2 K.YQILQLM chr4@312    | 3.74E-12 | 5.56E-04 |
| 29Nov2011  | 9005  | 826.44  | -27.4106 | 2 K.YQILQLM chr4@312    | 1.42E-10 | 0.006248 |
| 29Nov2011  | 11554 | 907.44  | -23.522  | 3 K.HRQK+14 Splice@chr  | 1.86E-10 | 0.005373 |
| 24Mar2011  | 1229  | 438.82  | -20.3896 | 5 K.FSRHVGS chr5@799    | 1.49E-10 | 0.002689 |
| 24Mar2011  | 15637 | 683.43  | -4.38249 | 2 _PEILK+14 chrX@120    | 3.19E-10 | 0.007147 |
| 24Mar2011  | 8237  | 683.43  | -4.38249 | 2 _PEILK+14 chrX@120    | 6.71E-10 | 0.005812 |
| 29Nov2011  | 6902  | 754.38  | -17.8031 | 3 R.DAYSEEK chr5@191    | 2.99E-10 | 0.009452 |
| 26July2011 | 1659  | 630.38  | -6.96003 | 4 K.NILDINPK chr2@992   | 4.19E-12 | 0        |
| 24Mar2011  | 10185 | 1186.06 | 12.90834 | 2 R.SLYSSM+ chr1@104    | 1.35E-10 | 0.006744 |
| 24Mar2011  | 16611 | 1108.59 | -17.4731 | 3 R.YRLLKM+ chr2@377    | 1.63E-10 | 0.003981 |
| 24Mar2011  | 11328 | 874.98  | -18.646  | 4 R.FK+14.01 Splice@chr | 2.29E-10 | 0.002634 |
| 24Mar2011  | 2755  | 559.32  | 1.530494 | 2 R.M+15.99 Splice@chr  | 4.21E-10 | 0.008929 |
| 26July2011 | 1296  | 566.97  | -10.4656 | 3 R.SRYTRTSI chrX@131   | 6.81E-11 | 0.002556 |
| 29Nov2011  | 12119 | 917.98  | 0.133123 | 2 R.RKMCVE chr5@674     | 2.25E-10 | 0.007565 |
| 24Mar2011  | 1773  | 464.21  | 21.43827 | 2 _GSVCSDS Splice@chr   | 3.55E-10 | 0.009581 |
| 24Mar2011  | 17132 | 1102.55 | -20.2293 | 3 K.WLLM+1 Splice@chr   | 2.23E-10 | 0.005981 |
| 26July2011 | 132   | 586.85  | -3.07421 | 2 R.SRAIAWF chr2@116    | 3.39E-10 | 0        |
| 24Mar2011  | 22218 | 1094.62 | 23.8157  | 2 R.FWKFLAI chr1@139    | 4.43E-10 | 0.009353 |
| 26July2011 | 1691  | 500.62  | -5.13091 | 3 _QFPGK+1 Splice@chr   | 6.66E-11 | 0.00303  |
| 24Mar2011  | 13811 | 1003.99 | 14.15683 | 2 _SELEKPM chr5@111     | 5.17E-10 | 0.009948 |
| 24Mar2011  | 15949 | 1077.57 | -18.8978 | 3 K.RFHIVDYI chr4@367   | 1.16E-10 | 0.007104 |
| 29Nov2011  | 14001 | 731.89  | -10.4385 | 2 K.M+15.99 chr2@516    | 3.32E-11 | 9.03E-04 |
| 24Mar2011  | 5959  | 927.52  | 12.38489 | 1 K.HCGILSLK chr1@116   | 2.98E-10 | 0.005841 |
| 24Mar2011  | 5090  | 703.35  | -24.7665 | 2 R.KRDRQR chrX@100     | 5.99E-10 | 0.007689 |
| 24Mar2011  | 4068  | 420.91  | -11.6844 | 3 K.NLNMTIK chr2@100    | 1.08E-09 | 0.009921 |
| 26July2011 | 123   | 485.92  | -11.4119 | 3 R.VNWKNE chr2@715     | 2.27E-10 | 0.003436 |

|            |       |         |          |                         |          |          |
|------------|-------|---------|----------|-------------------------|----------|----------|
| 26July2011 | 511   | 495.27  | 9.545424 | 4 _ .YECALLC Splice@chr | 5.40E-11 | 0.004926 |
| 24Mar2011  | 6122  | 1087.55 | -28.07   | 2 K.YFLRFLRN chr5@1984  | 4.74E-10 | 0.008214 |
| 24Mar2011  | 19838 | 1047.88 | -1.39926 | 3 K.NAQTCLKF chr2@1286  | 2.56E-10 | 0.006091 |
| 24Mar2011  | 13800 | 891.98  | 16.00616 | 2 R.EK+14.01 chrX@1524  | 4.17E-10 | 0.005609 |
| 26July2011 | 1761  | 762.9   | 2.883967 | 2 _ .TTALM+1 chrX@2674  | 1.93E-10 | 0.008574 |
| 29Nov2011  | 1098  | 402.21  | -10.4312 | 2 K.ATAGAQT chr2@7934   | 3.82E-11 | 0.00194  |
| 26July2011 | 825   | 402.23  | 23.12324 | 2 R.TAITMIGI chr2@9970  | 3.02E-11 | 0        |
| 24Mar2011  | 7705  | 896.98  | 22.93752 | 2 R.LHFFLTNI chr4@5287  | 5.37E-11 | 7.37E-04 |
| 26July2011 | 5742  | 748.41  | 18.54712 | 3 _ .IQGAENL chr4@3839  | 2.21E-10 | 0.006171 |
| 26July2011 | 461   | 724.35  | 9.956865 | 2 R.NGDSQV chr3@8853    | 7.83E-15 | 0        |
| 26July2011 | 559   | 724.35  | 9.956865 | 2 R.NGDSQV chr3@8853    | 6.61E-14 | 0        |
| 29Nov2011  | 16958 | 1032.55 | 8.875405 | 2 K.KMIKRNI chr5@1343   | 2.67E-10 | 0.007749 |
| 24Mar2011  | 5367  | 1023.87 | -29.5959 | 3 K.KNRNLQI chr1@1116   | 3.77E-10 | 0.00823  |
| 24Mar2011  | 24379 | 965.97  | -26.7991 | 2 K.SSHDLRR Splice@chr  | 4.18E-10 | 0.008886 |
| 29Nov2011  | 13312 | 647.33  | -26.4221 | 3 R.LLMSRFS Splice@chr  | 2.36E-10 | 0.009535 |
| 26July2011 | 408   | 442.24  | -20.9014 | 3 K.NGRNFS\ chr2@6792   | 6.99E-11 | 0.002762 |
| 24Mar2011  | 6030  | 580.61  | -20.2884 | 3 R.SCLEVGT chr4@1216   | 4.35E-10 | 0.005769 |
| 24Mar2011  | 10818 | 1072.54 | 10.65575 | 3 R.WVRM+1 chr2@7046    | 6.92E-10 | 0.008383 |
| 24Mar2011  | 9216  | 1096.9  | -7.92889 | 3 R.VEDVK+1 chr5@6222   | 1.61E-10 | 0.002438 |
| 24Mar2011  | 10348 | 926.13  | 28.18318 | 3 Q.DSPGK+1 Splice@chr  | 5.24E-10 | 0.009091 |
| 24Mar2011  | 9802  | 983.54  | 22.61229 | 4 _ .FSKSASLE chrX@2096 | 3.49E-10 | 0.009427 |
| 26July2011 | 2960  | 563.97  | 6.835704 | 3 _ .EPGLQFD Splice@chr | 9.67E-11 | 0.004697 |
| 24Mar2011  | 4640  | 826.95  | 14.08755 | 2 R.EEK+14.0 chrX@1425  | 9.13E-10 | 0.00793  |
| 29Nov2011  | 7125  | 601.83  | -1.4222  | 2 R.LMRDAEI chr5@1235   | 5.81E-11 | 0.004699 |
| 29Nov2011  | 10668 | 897.44  | -22.7861 | 2 V.SVFM+15 chr3@1289   | 1.35E-10 | 0.005704 |
| 29Nov2011  | 11780 | 1077.57 | -20.0495 | 2 V.KK+14.01 chr4@1240  | 2.45E-11 | 0.001711 |
| 29Nov2011  | 13023 | 1077.57 | -20.0495 | 2 V.KK+14.01 chr4@1240  | 4.83E-12 | 5.10E-04 |
| 29Nov2011  | 14103 | 1077.57 | -20.0495 | 2 V.KK+14.01 chr4@1240  | 5.47E-11 | 0.002311 |
| 29Nov2011  | 1541  | 577.3   | 15.67494 | 2 K.TSADIFG5 chr3@9503  | 8.76E-11 | 0.003333 |
| 26July2011 | 7915  | 842.39  | -22.8099 | 3 K.CLKNWLI chr5@5634   | 6.52E-11 | 0        |
| 24Mar2011  | 3769  | 743.44  | 5.847719 | 1 R.GGRISPR chr4@1236   | 4.65E-10 | 0.006783 |
| 24Mar2011  | 2297  | 743.44  | 5.847719 | 1 R.GGRISPR chr4@1236   | 4.65E-10 | 0.007338 |
| 26July2011 | 2026  | 934.17  | 21.22243 | 3 K.VNENIVT chr4@9889   | 1.32E-10 | 0.004496 |
| 24Mar2011  | 4200  | 456.91  | 14.33721 | 3 K.M+15.99 chr2@5770   | 6.09E-10 | 0.009375 |
| 24Mar2011  | 2983  | 456.91  | 14.33721 | 3 K.M+15.99 chr2@5770   | 6.15E-10 | 0.009087 |
| 29Nov2011  | 15445 | 671.88  | -1.36468 | 4 R.KELEIMRI chr2@5168  | 1.84E-10 | 0.006034 |
| 26July2011 | 6360  | 942.44  | -8.55778 | 3 _ .TCDKPD+ chr5@8669  | 3.85E-11 | 0.001511 |
| 24Mar2011  | 10879 | 1016.62 | 11.31164 | 1 K.RDIVFIPR chr3@3677  | 1.60E-10 | 0.002338 |
| 26July2011 | 7464  | 872.77  | -29.6849 | 3 R.CSCLFSHI chr4@8006  | 2.11E-11 | 0        |
| 29Nov2011  | 665   | 588.34  | 24.0803  | 2 _ .HQFLM+ chr4@1388   | 1.30E-10 | 0.003366 |
| 24Mar2011  | 59    | 792.36  | 28.38379 | 1 K.DEGESQK chrX@1046   | 1.55E-10 | 0.00487  |
| 26July2011 | 13    | 452.22  | -15.1499 | 3 _ .SDHLHST Splice@chr | 6.47E-11 | 0.003759 |
| 24Mar2011  | 5974  | 1033.54 | -10.8258 | 1 R.KLTNWEI chr5@9555   | 1.21E-10 | 0.002374 |
| 24Mar2011  | 6052  | 1033.54 | -10.8258 | 1 R.KLTNWEI chr5@9555   | 1.81E-10 | 0.002895 |
| 24Mar2011  | 9878  | 820.38  | -3.57551 | 2 R.HLFMCM chr5@1831    | 1.32E-10 | 0.00196  |
| 26July2011 | 3039  | 619.65  | 17.85775 | 4 _ .PRTKEM/ Splice@chr | 2.48E-10 | 0.0065   |
| 29Nov2011  | 14784 | 1090.55 | 7.54396  | 3 R.YFEK+14. Splice@chr | 2.49E-10 | 0.007641 |

|            |       |         |          |                         |          |          |
|------------|-------|---------|----------|-------------------------|----------|----------|
| 29Nov2011  | 3438  | 1030.53 | -22.6463 | 1 R.DKQLELE chr2@3386   | 3.10E-10 | 0.00854  |
| 29Nov2011  | 9936  | 1077.56 | 28.12152 | 1 K.LCAMDG Splice@chr   | 1.43E-10 | 0.004718 |
| 26July2011 | 234   | 407.57  | 12.51058 | 3 K.KK+14.01 chr4@1579  | 5.02E-11 | 0.004882 |
| 29Nov2011  | 8673  | 957.97  | 9.758452 | 2 K.RKM+15. chr1@8411   | 1.48E-10 | 0.006326 |
| 24Mar2011  | 5153  | 581.28  | -27.5267 | 2 K.KMCTTKS chr5@4380   | 5.32E-10 | 0.008603 |
| 24Mar2011  | 1364  | 487.79  | 0.692535 | 2 R.LKEQNTL Splice@chr  | 3.47E-10 | 0.004136 |
| 29Nov2011  | 6150  | 522.79  | 3.158319 | 2 R.IDEAAERI Splice@chr | 3.25E-10 | 0.008012 |
| 29Nov2011  | 5932  | 550.64  | -3.5914  | 3 _GRRGGG Splice@chr    | 7.30E-11 | 0.003231 |
| 26July2011 | 7411  | 849.79  | 18.31319 | 3 _ACNK+14 Splice@chr   | 1.25E-10 | 0.005892 |
| 24Mar2011  | 423   | 930.49  | -23.7704 | 1 K.RENRVEK chr3@1946   | 4.65E-10 | 0.003865 |
| 24Mar2011  | 3631  | 565.81  | -2.64803 | 2 K.KQENLG\ chr4@2187   | 3.26E-10 | 0.003842 |
| 26July2011 | 1086  | 601.38  | 8.33637  | 2 K.AERAFKV chr5@5341   | 2.82E-10 | 0.006828 |
| 26July2011 | 7513  | 773.1   | -8.83026 | 3 V.FDVRPPV chr2@1100   | 2.03E-10 | 0.005848 |
| 24Mar2011  | 10708 | 1113.25 | -23.5476 | 3 R.RLSSHIG\ chr2@1229  | 3.84E-11 | 7.14E-04 |
| 24Mar2011  | 14194 | 1028.56 | -17.5817 | 1 K.KVYSEFKI chrX@1099  | 3.59E-10 | 0.004951 |
| 26July2011 | 1803  | 477.92  | -21.2442 | 3 _HFDAQIV chrX@4176    | 9.04E-11 | 0.001647 |
| 24Mar2011  | 13488 | 777.99  | -18.0357 | 5 K.REGGNK+ chr3@3973   | 1.22E-10 | 0.004857 |
| 29Nov2011  | 18001 | 1268.2  | -2.69727 | 2 K.QYFLK+1. chrX@4233  | 1.32E-11 | 8.23E-04 |
| 29Nov2011  | 15791 | 892.98  | 18.61254 | 2 R.M+15.99 chr2@1001   | 1.10E-10 | 0.003366 |
| 26July2011 | 1448  | 665.88  | -27.5392 | 2 R.KFVNYVYV chr5@6606  | 2.00E-10 | 0.008582 |
| 29Nov2011  | 20177 | 992.04  | -27.4673 | 2 K.KRFM+15 chr4@3236   | 2.68E-10 | 0.007994 |
| 26July2011 | 3449  | 935.51  | 4.702559 | 2 R.ILEIGSGG chr4@1569  | 1.16E-15 | 0        |
| 29Nov2011  | 4924  | 985     | 25.53932 | 2 _TLNVNGC Splice@chr   | 1.51E-11 | 3.05E-04 |
| 29Nov2011  | 5517  | 985     | 25.53932 | 2 _TLNVNGC Splice@chr   | 4.50E-12 | 5.38E-04 |
| 29Nov2011  | 5558  | 985     | 25.53932 | 2 _TLNVNGC Splice@chr   | 1.18E-11 | 6.95E-04 |
| 29Nov2011  | 5498  | 985     | 25.53932 | 2 _TLNVNGC Splice@chr   | 1.33E-11 | 5.76E-04 |
| 29Nov2011  | 5641  | 985     | 25.53932 | 2 _TLNVNGC Splice@chr   | 1.25E-11 | 8.23E-04 |
| 29Nov2011  | 5760  | 985     | 25.53932 | 2 _TLNVNGC Splice@chr   | 1.14E-11 | 6.64E-04 |
| 29Nov2011  | 13344 | 910.46  | -7.55303 | 2 K.TRWPSFL chr4@1376   | 1.69E-10 | 0.00682  |
| 24Mar2011  | 18840 | 1118.25 | 26.44171 | 3 R.HSVM+1' Splice@chr  | 3.40E-10 | 0.007686 |
| 29Nov2011  | 9184  | 836.92  | 21.66407 | 2 K.HAWWD' chrX@1171    | 1.86E-10 | 0.005373 |
| 29Nov2011  | 15973 | 917.18  | -18.015  | 3 K.KCPLETL\ chr1@8363  | 3.16E-11 | 7.89E-04 |
| 26July2011 | 1712  | 626.33  | 22.81152 | 2 K.GVGQPSI chr3@1320   | 5.97E-11 | 0.004926 |
| 26July2011 | 6955  | 668.43  | 28.69329 | 2 R.RRIREHRI chr5@1557  | 2.22E-10 | 0.009836 |
| 24Mar2011  | 5359  | 946.48  | 3.808772 | 2 _NLPKVQF chr4@2163    | 1.05E-10 | 0.005873 |
| 24Mar2011  | 13569 | 741.9   | -29.6336 | 2 R.NFTEKTK chr1@1300   | 2.51E-10 | 0.005927 |
| 26July2011 | 8906  | 557.31  | 4.449452 | 2 R.LRIEMHV Splice@chr  | 3.21E-11 | 9.01E-04 |
| 24Mar2011  | 10259 | 661.37  | 27.77477 | 3 _RSRVM+1 chr5@9923    | 4.90E-10 | 0.006906 |
| 24Mar2011  | 6111  | 749.9   | -16.8394 | 2 K.ANYLLFSI chr2@1222  | 4.65E-10 | 0.006474 |
| 26July2011 | 3293  | 615.3   | -24.5253 | 4 R.KTCEFLD, chr5@4242  | 3.81E-10 | 0.008868 |
| 29Nov2011  | 14228 | 1067.03 | -1.03059 | 2 _TRMIASS Splice@chr   | 3.12E-10 | 0.007596 |
| 26July2011 | 3501  | 550.32  | -10.3383 | 3 K.VSLSRTK\ chr4@1426  | 2.56E-11 | 9.82E-04 |
| 26July2011 | 2278  | 549.98  | -20.4568 | 3 K.VSLSRTK\ chr4@1426  | 1.06E-10 | 0.004585 |
| 26July2011 | 3429  | 549.98  | -20.4568 | 3 K.VSLSRTK\ chr4@1426  | 5.00E-11 | 0.001993 |
| 24Mar2011  | 2123  | 482.25  | -25.4527 | 2 R.HISSLFMI Splice@chr | 4.14E-10 | 0.008886 |
| 24Mar2011  | 9591  | 1002.02 | -7.80454 | 2 K.YRK+14.C chr2@7346  | 2.11E-10 | 0.001974 |
| 24Mar2011  | 1890  | 543.29  | -5.17738 | 2 K.SLHQLLC\ chr1@1303  | 3.39E-10 | 0.005024 |

|            |       |         |          |                         |          |          |
|------------|-------|---------|----------|-------------------------|----------|----------|
| 29Nov2011  | 20029 | 1027.55 | 13.55639 | 2 K.YRSDYLK chr2@1117   | 3.28E-11 | 9.03E-04 |
| 29Nov2011  | 17331 | 1122.58 | -19.8082 | 1 K.LSMFVTP chr5@1374   | 2.54E-10 | 0.00655  |
| 26July2011 | 3736  | 626.68  | -7.70947 | 3 K.NEPKLND chr5@2070   | 1.02E-10 | 0.006089 |
| 26July2011 | 2431  | 634.01  | -18.1032 | 3 K.KAGFSK+ chr5@1935   | 1.06E-10 | 0.002962 |
| 26July2011 | 1402  | 482.28  | 4.358703 | 3 K.WIVLLEG chr2@3936   | 1.49E-10 | 0.005858 |
| 29Nov2011  | 10949 | 1033.06 | -7.33326 | 2 K.KFKSTTK chr5@5022   | 2.32E-11 | 0.001971 |
| 24Mar2011  | 11166 | 895.94  | 2.728042 | 2 K.IIGGFEDC chr4@2100  | 6.63E-19 | 0        |
| 24Mar2011  | 1438  | 563.77  | 17.1364  | 2 R.ETYTDGE chr5@1466   | 1.75E-10 | 0.002438 |
| 26July2011 | 939   | 487.27  | -25.4797 | 2 K.LVEADVIL chr3@1360  | 1.31E-10 | 0.003444 |
| 24Mar2011  | 3549  | 583.32  | -29.2135 | 2 R.KTFVLVTI chr4@4625  | 1.17E-10 | 0.001645 |
| 29Nov2011  | 5663  | 974.52  | 10.63364 | 2 R.WICCWR chr1@3654    | 3.64E-11 | 0.002305 |
| 24Mar2011  | 2631  | 419.72  | 21.74864 | 2 _SYPGGAA chr5@1526    | 5.84E-10 | 0.007863 |
| 24Mar2011  | 15101 | 785.39  | 18.7103  | 3 K.YNFSNNS chr1@5597   | 1.86E-10 | 0.005582 |
| 24Mar2011  | 7260  | 1009.55 | -9.9854  | 2 K.K+14.016 chr5@6317  | 2.27E-10 | 0.006299 |
| 29Nov2011  | 8437  | 672.35  | -22.6072 | 2 K.NQNINNI chr4@8938   | 7.97E-11 | 0.002175 |
| 26July2011 | 4171  | 873.97  | -2.30727 | 4 K.RQLFVILK chr5@1404  | 2.38E-11 | 0.001433 |
| 29Nov2011  | 10303 | 585.97  | -28.012  | 3 K.NLESLSQI chr4@2361  | 1.05E-10 | 0.004639 |
| 29Nov2011  | 9891  | 840.9   | -10.2464 | 2 K.YFPINQEI chrX@1121  | 1.26E-10 | 0.004522 |
| 26July2011 | 2346  | 986.5   | 8.670791 | 3 R.HHAMMI Splice@chr   | 2.26E-11 | 0        |
| 24Mar2011  | 1743  | 452.77  | 18.91501 | 2 R.RMSGGK chr1@7038    | 7.13E-11 | 0.002205 |
| 24Mar2011  | 15418 | 974.57  | 7.972446 | 1 R.RVACRRF chr4@1247   | 3.49E-10 | 0.005556 |
| 24Mar2011  | 7812  | 467.24  | -21.9632 | 3 R.RGEFCVK chr2@3348   | 3.42E-10 | 0.009359 |
| 26July2011 | 2562  | 644.36  | 10.05638 | 2 R.CCLLPMP chrX@2094   | 7.35E-11 | 0.00638  |
| 26July2011 | 1163  | 462.89  | -15.769  | 3 R.VSVLTGN Splice@chr  | 9.24E-12 | 0        |
| 24Mar2011  | 10315 | 1073.58 | 24.66572 | 1 R.IYMFEGG chr4@1020   | 1.50E-10 | 0.001776 |
| 29Nov2011  | 7063  | 481     | 19.18067 | 4 R.FEPPFVPI chr1@1601  | 1.20E-10 | 0.004131 |
| 26July2011 | 7249  | 798.42  | 0.938603 | 4 R.ATRDLYE chr1@4776   | 9.24E-11 | 0.002979 |
| 29Nov2011  | 14701 | 1134.59 | 5.091363 | 2 R.RM+15.9 chr1@1217   | 3.24E-10 | 0.008296 |
| 26July2011 | 641   | 700.4   | -23.8238 | 2 K.QKLFFFW chr4@1638   | 5.40E-11 | 0.003137 |
| 29Nov2011  | 14294 | 746.13  | 25.06599 | 4 K.YFYTIDNI chr2@7035  | 1.03E-10 | 0.004734 |
| 26July2011 | 6826  | 765.45  | 16.34023 | 2 K.IRVFVK+1 chrX@7136  | 2.44E-10 | 0.007983 |
| 29Nov2011  | 1376  | 594.3   | -0.77041 | 2 R.HNPIDFLI Splice@chr | 1.43E-10 | 0.002763 |
| 26July2011 | 2579  | 659.76  | 20.36455 | 3 K.FQAKKIKI chr3@2595  | 1.79E-10 | 0.007846 |
| 29Nov2011  | 16820 | 812.45  | 24.62401 | 4 K.TFFTNISe chrX@2537  | 5.78E-11 | 0.0019   |
| 24Mar2011  | 6914  | 803.43  | -23.5031 | 2 K.LVLRNITI chr2@6296  | 1.30E-10 | 0.00196  |
| 29Nov2011  | 15735 | 1021.52 | -20.0354 | 1 K.RYLWMP Splice@chr   | 9.69E-11 | 0.003569 |
| 24Mar2011  | 4125  | 544.3   | 5.729534 | 2 K.NEEITGIR chr2@1435  | 3.52E-10 | 0.005016 |
| 29Nov2011  | 3045  | 707.34  | 11.57926 | 2 R.QNHRVSI Splice@chr  | 4.66E-11 | 0.001399 |
| 24Mar2011  | 3160  | 405.21  | 21.14067 | 3 K.CDK+14.( chrX@1606  | 9.44E-11 | 0.002855 |
| 29Nov2011  | 2663  | 962.51  | -7.68668 | 1 K.ADRVMIE chr4@4949   | 8.78E-11 | 0.002794 |
| 29Nov2011  | 3055  | 962.51  | -7.68668 | 1 K.ADRVMIE chr4@4949   | 1.31E-10 | 0.005542 |
| 29Nov2011  | 7525  | 634.34  | -25.9233 | 2 R.FIKNVEFI chr1@4774  | 2.59E-10 | 0.007521 |
| 24Mar2011  | 4663  | 897.95  | -10.003  | 2 R.AEKRFDL Splice@chr  | 1.58E-10 | 0.003505 |
| 24Mar2011  | 4707  | 897.95  | -10.003  | 2 R.AEKRFDL Splice@chr  | 9.45E-12 | 2.68E-04 |
| 24Mar2011  | 4872  | 897.95  | -10.003  | 2 R.AEKRFDL Splice@chr  | 1.39E-10 | 0.001833 |
| 24Mar2011  | 4832  | 898.45  | -11.8731 | 2 R.AEKRFDL Splice@chr  | 1.99E-10 | 0.002987 |
| 24Mar2011  | 4746  | 897.95  | -10.003  | 2 R.AEKRFDL Splice@chr  | 4.41E-11 | 6.53E-04 |

|            |       |         |          |                         |          |          |
|------------|-------|---------|----------|-------------------------|----------|----------|
| 24Mar2011  | 4787  | 897.95  | -10.003  | 2 R.AEKRFDL Splice@chr  | 2.58E-10 | 0.003557 |
| 24Mar2011  | 4715  | 898.45  | -11.8731 | 2 R.AEKRFDL Splice@chr  | 1.41E-10 | 0.001651 |
| 24Mar2011  | 4663  | 897.95  | -10.003  | 2 R.AEKRFDL Splice@chr  | 3.38E-11 | 0        |
| 24Mar2011  | 4763  | 897.95  | -10.003  | 2 R.AEKRFDL Splice@chr  | 2.95E-11 | 0        |
| 24Mar2011  | 7299  | 1073.56 | 12.47634 | 1 R.CSRQHR1 chr1@6571   | 5.04E-11 | 4.59E-04 |
| 29Nov2011  | 5514  | 912.44  | -18.7258 | 2 R.FSK+14.0 Splice@chr | 1.93E-10 | 0.00376  |
| 26July2011 | 5254  | 659.32  | -27.6282 | 3 R.QLVHHN1 chr4@9991   | 2.32E-10 | 0.009289 |
| 29Nov2011  | 15559 | 1192.66 | -21.169  | 1 K.LCRMKR1 chr3@1171   | 2.40E-10 | 0.005801 |
| 24Mar2011  | 10600 | 995.87  | -14.7239 | 3 R.FADSSHL chr2@6801   | 3.98E-10 | 0.00657  |
| 24Mar2011  | 5342  | 938.97  | -4.81531 | 2 K.REKVNMI chr3@1301   | 2.08E-10 | 0.002086 |
| 29Nov2011  | 11017 | 874.44  | 26.9044  | 2 R.ETEEVAG chr2@8531   | 2.92E-10 | 0.009452 |
| 26July2011 | 2753  | 627.32  | 11.88924 | 2 K.HCSNKK1 chr5@1951   | 6.44E-11 | 0.002962 |
| 29Nov2011  | 12936 | 920.5   | 15.77508 | 2 R.HFRQK+1 chr3@6941   | 4.00E-11 | 0.001007 |
| 29Nov2011  | 10959 | 510.26  | 10.91527 | 3 R.GDQFVS1 chr1@3591   | 4.76E-11 | 0.003038 |
| 24Mar2011  | 4067  | 674.66  | -22.026  | 3 K.FKIQEQT1 chr3@5071  | 3.01E-10 | 0.006327 |
| 24Mar2011  | 9208  | 997.04  | 15.01341 | 4 R.LFRMFPR chr5@8461   | 5.47E-10 | 0.007836 |
| 24Mar2011  | 18458 | 884.99  | -28.8603 | 2 _IKK+14.01 chr2@6341  | 2.37E-10 | 0.005485 |
| 24Mar2011  | 5794  | 512     | -2.7074  | 3 R.K+14.016 chr1@6451  | 2.63E-11 | 2.36E-04 |
| 24Mar2011  | 5845  | 512     | -2.7074  | 3 R.K+14.016 chr1@6451  | 1.71E-10 | 0.00191  |
| 29Nov2011  | 15241 | 1231.98 | -3.48768 | 3 _KNYSFFPI chrX@8591   | 1.27E-10 | 0.0042   |
| 26July2011 | 7480  | 799.06  | -18.9483 | 3 R.FFGFISVL Splice@chr | 1.55E-10 | 0.007986 |
| 24Mar2011  | 3959  | 458.24  | -3.2927  | 3 K.LMYFSLE1 Splice@chr | 3.22E-10 | 0.006536 |
| 24Mar2011  | 12943 | 898.44  | 25.21396 | 2 K.NGGCKLL chr3@8261   | 1.19E-10 | 0.003279 |
| 24Mar2011  | 1124  | 498.27  | 25.8363  | 3 K.NKVLGVC chr2@1231   | 2.16E-10 | 0.00197  |
| 24Mar2011  | 5922  | 968.42  | -13.8799 | 2 R.KCK+14.01 chrX@8121 | 4.98E-11 | 0.001994 |
| 29Nov2011  | 11746 | 846.92  | -2.63387 | 2 _WYIDFVN1 chr2@1651   | 2.22E-10 | 0.007227 |
| 24Mar2011  | 8404  | 1071.61 | 25.24044 | 2 K.IISMSNQ chr4@5211   | 3.95E-10 | 0.007294 |
| 26July2011 | 178   | 482.93  | 7.176851 | 3 R.RLVNEKA Splice@chr  | 3.63E-11 | 9.74E-04 |
| 24Mar2011  | 10066 | 944.26  | 4.076567 | 4 R.FVM+15. Splice@chr  | 1.03E-10 | 8.70E-04 |
| 29Nov2011  | 6875  | 1051.49 | 19.91088 | 2 _GFNGDN Splice@chr    | 4.59E-13 | 3.05E-04 |
| 29Nov2011  | 6974  | 1051.49 | 19.91088 | 2 _GFNGDN Splice@chr    | 1.70E-11 | 8.61E-04 |
| 29Nov2011  | 7593  | 1051.5  | 29.44435 | 2 _GFNGDN Splice@chr    | 2.25E-10 | 0.006591 |
| 29Nov2011  | 2934  | 898.48  | -2.99329 | 1 R.SPSLPGSI chr5@1921  | 3.05E-10 | 0.009856 |
| 29Nov2011  | 2978  | 898.48  | -2.99329 | 1 R.SPSLPGSI chr5@1921  | 2.23E-10 | 0.007565 |
| 24Mar2011  | 4811  | 902.75  | -29.1366 | 3 R.SKLSPIFE chr5@1791  | 5.60E-10 | 0.00905  |
| 29Nov2011  | 6403  | 676.85  | 10.05159 | 4 R.MVARW1 Splice@chr   | 1.27E-10 | 0.007277 |
| 24Mar2011  | 1034  | 589.34  | 17.53282 | 2 K.ASWSKM chr2@2951    | 2.30E-10 | 0.004156 |
| 29Nov2011  | 10042 | 675.39  | -13.6115 | 3 K.KIKVYFFS chr4@1301  | 1.96E-10 | 0.005726 |
| 26July2011 | 3318  | 781.41  | 14.46904 | 2 _MTGSAQ Splice@chr    | 5.59E-12 | 0        |
| 26July2011 | 3060  | 781.41  | 14.46904 | 2 R.MTGSAQ chr4@7781    | 4.95E-13 | 0        |
| 24Mar2011  | 10091 | 908.46  | -5.80809 | 3 _DRIQSK+1 Splice@chr  | 4.90E-11 | 0.003908 |
| 24Mar2011  | 3437  | 610.32  | -7.16629 | 2 R.KRMSALT chr2@6821   | 1.21E-10 | 0.006577 |
| 24Mar2011  | 9828  | 888.43  | -29.1419 | 2 K.YWCINIK1 Splice@chr | 1.74E-10 | 0.002338 |
| 29Nov2011  | 13350 | 761.88  | -22.6877 | 4 K.FSENFVK- chr4@7781  | 1.27E-10 | 0.003798 |
| 29Nov2011  | 15300 | 761.63  | -21.5851 | 4 K.FSENFVK- chr4@7781  | 1.25E-10 | 0.003722 |
| 26July2011 | 43    | 487.78  | 21.62981 | 2 R.FQPSGIP1 chr2@1511  | 2.37E-10 | 0.00641  |
| 26July2011 | 3223  | 780.4   | -11.6723 | 3 R.IFIICKCLS chrX@8341 | 5.40E-11 | 0.009836 |

|            |       |         |          |                          |          |          |
|------------|-------|---------|----------|--------------------------|----------|----------|
| 26July2011 | 508   | 437.91  | 11.0465  | 3 K.KILTCFCC chr5@7342   | 8.21E-11 | 0.003135 |
| 26July2011 | 1515  | 476.25  | -15.0688 | 3 R.FIVM+15 Splice@chr   | 5.05E-11 | 0.002436 |
| 26July2011 | 549   | 703.86  | -23.3309 | 2 _IWNVPGI Splice@chr    | 1.59E-10 | 0.009975 |
| 29Nov2011  | 14495 | 1041.18 | -16.3363 | 3 R.NRICLKK+ chr5@1806   | 2.65E-10 | 0.006393 |
| 24Mar2011  | 141   | 402.21  | -18.5225 | 3 R.PTTTTTA chr1@3334    | 1.16E-10 | 0.001318 |
| 29Nov2011  | 2863  | 437.25  | -26.9322 | 2 _ATAAASL Splice@chr    | 3.04E-10 | 0.008701 |
| 24Mar2011  | 349   | 464.23  | 8.97194  | 2 K.SGGAYV chrX@6045     | 2.98E-10 | 0.00948  |
| 29Nov2011  | 4733  | 1086.06 | -1.01252 | 2 Q.KNQSLRC Splice@chr   | 2.01E-10 | 0.009798 |
| 24Mar2011  | 7571  | 747.42  | 13.73778 | 2 K.NQQNILY Splice@chr   | 4.71E-10 | 0.008214 |
| 29Nov2011  | 12076 | 620.36  | -19.2163 | 2 K.KMLISNH Splice@chr   | 3.12E-10 | 0.008678 |
| 29Nov2011  | 326   | 423.25  | -7.01063 | 4 K.KKK+14.C chr3@3028   | 2.84E-10 | 0.008969 |
| 24Mar2011  | 11002 | 992.53  | 24.13094 | 2 R.QCTVYIR Splice@chr   | 1.75E-10 | 0.007524 |
| 24Mar2011  | 8599  | 874.97  | 17.22631 | 2 R.TQRM+1 chr2@1375     | 2.72E-11 | 4.15E-04 |
| 29Nov2011  | 13463 | 917.52  | -5.36264 | 2 K.AWKTDK chrX@9466     | 2.16E-11 | 9.08E-04 |
| 24Mar2011  | 7075  | 572.3   | -7.79904 | 2 _LTVDVSA chr3@1010     | 1.01E-10 | 0.001064 |
| 24Mar2011  | 7979  | 680.84  | 2.78318  | 2 K.QHNFLISI Splice@chr  | 1.87E-10 | 0.001983 |
| 24Mar2011  | 11031 | 524.63  | -20.2816 | 3 K.LTWHTFL chr1@1494    | 2.19E-10 | 0.006359 |
| 24Mar2011  | 2614  | 415.23  | -11.6481 | 3 K.FIFRKCM chrX@6055    | 5.57E-10 | 0.009542 |
| 24Mar2011  | 2317  | 415.23  | -11.6481 | 3 K.FIFRKCM chrX@6055    | 1.87E-10 | 0.003704 |
| 24Mar2011  | 5673  | 846.44  | -19.7808 | 2 K.M+15.99 chr2@5637    | 4.06E-11 | 6.57E-04 |
| 29Nov2011  | 3771  | 1222.63 | 14.35296 | 1 R.NYFRYIS chrX@1014    | 1.51E-10 | 0.004873 |
| 24Mar2011  | 1502  | 469.28  | 5.539532 | 2 R.VHAAADI chr3@8965    | 5.76E-10 | 0.007232 |
| 24Mar2011  | 3481  | 526.6   | -26.631  | 3 K.IVFMLEN chr1@5377    | 2.48E-11 | 0        |
| 24Mar2011  | 3529  | 580.31  | -15.1716 | 2 R.IMVLHNC chr3@1324    | 6.26E-11 | 0.004351 |
| 24Mar2011  | 4967  | 711.36  | -19.9032 | 2 T.VDPLAFS Splice@chr   | 2.72E-10 | 0.001687 |
| 29Nov2011  | 5093  | 607.3   | 1.462691 | 2 R.KMSSAIV chr2@6745    | 2.53E-10 | 0.007628 |
| 29Nov2011  | 11649 | 794.05  | -16.7069 | 3 K.PFTESEF chr5@1227    | 1.39E-10 | 0.003592 |
| 24Mar2011  | 1577  | 472.29  | -14.2458 | 3 K.QKETK+1 chr1@9691    | 4.16E-10 | 0.008349 |
| 26July2011 | 1120  | 559.96  | -22.5666 | 3 K.ISAAVSSS chrX@9965   | 2.80E-11 | 0.002423 |
| 29Nov2011  | 7282  | 654.35  | -17.3583 | 4 K.TLIGLIVSI chr4@9392  | 1.14E-10 | 0.00607  |
| 29Nov2011  | 2413  | 412.56  | -5.98472 | 3 K.IAEFEQKI chr2@2059   | 1.08E-10 | 0.003501 |
| 24Mar2011  | 182   | 403.23  | 1.46987  | 3 K.LSTTTTA chr3@1308    | 1.93E-10 | 0.008678 |
| 26July2011 | 583   | 442.24  | 24.62315 | 3 K.SSGK+14. Splice@chr  | 1.45E-10 | 0.002941 |
| 24Mar2011  | 9474  | 741.71  | -0.63107 | 3 R.RISEELICI Splice@chr | 2.45E-10 | 0.005403 |
| 26July2011 | 2547  | 427.23  | 15.24084 | 3 R.LEPSLAG Splice@chr   | 2.68E-10 | 0.009836 |
| 29Nov2011  | 5091  | 1217.12 | 10.53975 | 2 R.HKVVRLC Splice@chr   | 2.48E-11 | 8.63E-04 |
| 29Nov2011  | 11070 | 689.36  | -4.34474 | 4 K.AK+14.01 chr5@1177   | 1.13E-10 | 0.006709 |
| 26July2011 | 5260  | 574.55  | -0.74492 | 4 R.ENLWML chr5@6380     | 3.88E-11 | 0.001252 |
| 24Mar2011  | 3135  | 765.45  | -7.54863 | 2 K.K+14.016 chr2@7690   | 8.23E-10 | 0.007489 |
| 24Mar2011  | 14088 | 810.44  | 19.12869 | 2 R.ICFLGFVI Splice@chr  | 2.11E-10 | 0.004049 |
| 26July2011 | 560   | 442.25  | 22.40927 | 3 K.CAIFVK+1 chrX@2955   | 8.41E-11 | 0.002556 |
| 29Nov2011  | 757   | 452.25  | 25.90302 | 2 K.FNSAHL chr1@7085     | 1.95E-10 | 0.008476 |
| 29Nov2011  | 523   | 452.25  | 25.90302 | 2 K.FNSAHL chr1@7085     | 1.43E-10 | 0.004319 |
| 29Nov2011  | 403   | 452.25  | 25.90302 | 2 K.FNSAHL chr1@7085     | 1.15E-10 | 0.00607  |
| 24Mar2011  | 4783  | 965.96  | -23.4454 | 2 R.ALSSCRH chr5@2102    | 3.66E-10 | 0.003496 |
| 26July2011 | 551   | 548.29  | 27.63027 | 2 R.RNMKMN chrX@9928     | 1.56E-10 | 0.007353 |
| 29Nov2011  | 16642 | 776.39  | 12.21974 | 1 K.TPAMNN chr4@1032     | 9.53E-11 | 0.004734 |

|            |       |         |          |                          |          |          |
|------------|-------|---------|----------|--------------------------|----------|----------|
| 29Nov2011  | 7769  | 718.87  | -25.6764 | 2 K.LDFWAKI chr2@2567    | 2.36E-10 | 0.007279 |
| 24Mar2011  | 14190 | 1120.58 | -0.84443 | 2 F.GSILRTSK chr1@1257   | 2.77E-10 | 0.006651 |
| 24Mar2011  | 7087  | 1120.58 | -0.84443 | 2 F.GSILRTSK chr1@1257   | 4.87E-10 | 0.009905 |
| 26July2011 | 5576  | 626.34  | -3.90416 | 2 _..LLGDFCEI Splice@chr | 1.36E-10 | 0.003599 |
| 24Mar2011  | 3797  | 789.44  | 22.99229 | 1 K.VGREGSC chrX@1428    | 1.21E-11 | 3.92E-04 |
| 26July2011 | 14    | 406.47  | 23.23585 | 4 K.KNQSSAN chr2@4108    | 2.46E-10 | 0.009397 |
| 24Mar2011  | 4515  | 456.75  | -25.512  | 2 K.ITLEPSPR chr5@5111   | 3.05E-10 | 0.004288 |
| 26July2011 | 80    | 601.84  | -1.82852 | 2 R.ELSEK+14 chr1@6191   | 2.11E-10 | 0.008535 |
| 29Nov2011  | 11654 | 741.47  | 10.38609 | 2 K.IPEISNIQI chr5@1745  | 2.91E-10 | 0.009452 |
| 24Mar2011  | 3048  | 618.29  | -16.1167 | 1 K.WGGGGC chr2@1084     | 1.52E-10 | 0.001827 |
| 29Nov2011  | 4536  | 691.87  | -21.968  | 2 R.QIGK+14 chr3@1645    | 3.06E-10 | 0.009362 |
| 24Mar2011  | 13291 | 776.46  | 24.00686 | 1 R.MMVVAI Splice@chr    | 5.53E-10 | 0.007729 |
| 29Nov2011  | 13202 | 1018.85 | -4.2982  | 3 K.ARKNNTF chr3@5841    | 2.48E-10 | 0.007334 |
| 29Nov2011  | 13761 | 1059.2  | 12.25181 | 3 R.KMDEND chr4@1157     | 2.35E-10 | 0.008171 |
| 26July2011 | 4729  | 765.41  | -21.8506 | 2 R.ARKTFLT chr4@1469    | 1.29E-10 | 0.00448  |
| 29Nov2011  | 657   | 585.31  | 9.986268 | 2 K.ATAK+14 chr2@1489    | 2.72E-10 | 0.006924 |
| 26July2011 | 6770  | 575.27  | 25.20598 | 3 K.EMMCSS chrX@1024     | 2.34E-10 | 0.007403 |
| 29Nov2011  | 1524  | 498.27  | -25.9834 | 2 _..RRVYASS chr5@1702   | 1.58E-10 | 0.004691 |
| 24Mar2011  | 5596  | 473.24  | 8.530454 | 2 R.QNQGEE chr5@4841     | 3.36E-10 | 0.006911 |
| 24Mar2011  | 10663 | 859.41  | -7.75019 | 2 R.RETQTTV chr4@1465    | 1.23E-10 | 0.002902 |
| 24Mar2011  | 10372 | 1113.58 | 9.326202 | 2 K.KM+15.9 Splice@chr   | 4.22E-10 | 0.007549 |
| 24Mar2011  | 1342  | 545.31  | 15.09823 | 2 R.EEGKTGR chrX@1004    | 5.44E-10 | 0.007328 |
| 29Nov2011  | 9722  | 744.39  | 2.260853 | 2 K.LDDDSLQ chr5@6041    | 3.12E-10 | 0.008081 |
| 29Nov2011  | 13713 | 1010.5  | -1.99522 | 2 _..GHVFEES Splice@chr  | 2.74E-11 | 6.50E-04 |
| 29Nov2011  | 13709 | 1011.01 | 6.258789 | 2 _..GHVFEES Splice@chr  | 9.31E-12 | 2.80E-04 |
| 29Nov2011  | 12826 | 1010.51 | 7.920407 | 2 _..GHVFEES Splice@chr  | 2.86E-10 | 0.006741 |
| 29Nov2011  | 12867 | 1011.01 | 6.258789 | 2 _..GHVFEES Splice@chr  | 4.69E-11 | 0.001405 |
| 24Mar2011  | 14234 | 870.95  | 20.48714 | 2 K.RWHWW chr2@1477      | 1.95E-10 | 0.005582 |
| 26July2011 | 927   | 545.93  | -12.47   | 3 R.RM+15.9 chr5@4285    | 3.89E-11 | 0.001395 |
| 24Mar2011  | 22015 | 636.79  | 16.99231 | 2 K.KDFCGNF chr1@1692    | 4.74E-10 | 0.0095   |
| 24Mar2011  | 10474 | 551.32  | 8.916574 | 3 K.K+14.016 chrX@1434   | 3.47E-10 | 0.006987 |
| 24Mar2011  | 5680  | 747.44  | 28.53826 | 1 K.KMGGNL chrX@1686     | 9.64E-10 | 0.008238 |
| 24Mar2011  | 1038  | 416.23  | -19.9908 | 2 R.AENTRIK. chrX@1159   | 5.21E-10 | 0.008336 |
| 24Mar2011  | 1316  | 416.23  | -19.9908 | 2 R.AENTRIK. chrX@1159   | 5.56E-10 | 0.007617 |
| 24Mar2011  | 4491  | 570.29  | 20.69278 | 2 K.FQFENTT chr5@1674    | 1.92E-10 | 0.001197 |
| 24Mar2011  | 1367  | 622.86  | -2.25746 | 2 _..QLQSMR chr4@7535    | 3.98E-10 | 0.009105 |
| 29Nov2011  | 7956  | 926.14  | -13.7225 | 3 K.VFHETIIF chr4@1491   | 1.07E-10 | 0.002968 |
| 29Nov2011  | 7937  | 614.64  | -17.9452 | 3 R.ISCDIDLN chrX@2528   | 2.58E-10 | 0.006849 |
| 29Nov2011  | 1666  | 548.35  | 15.61191 | 2 R.PLTLSSRF chr2@3740   | 4.24E-11 | 0.001538 |
| 26July2011 | 745   | 434.89  | -9.61827 | 3 K.SNM+15. Splice@chr   | 9.55E-11 | 0.0053   |
| 26July2011 | 2388  | 581.99  | 18.06981 | 3 _..WFQRGL Splice@chr   | 1.25E-10 | 0.009975 |
| 29Nov2011  | 2739  | 567.32  | 7.221079 | 2 R.LMSADVI Splice@chr   | 3.08E-11 | 0.001312 |
| 26July2011 | 5738  | 669     | -9.38067 | 3 K.VQGYVW chr5@2051     | 1.95E-10 | 0.008574 |
| 24Mar2011  | 11896 | 875.49  | -21.0779 | 2 K.ILQLTFKK chr3@2757   | 1.09E-10 | 0.009543 |
| 24Mar2011  | 13047 | 1174.68 | -19.137  | 2 R.NFATLRH chr3@1292    | 1.14E-10 | 0.001013 |
| 29Nov2011  | 12696 | 813.43  | -15.7765 | 2 K.KYIFK+14 chr2@9890   | 3.50E-10 | 0.009665 |
| 24Mar2011  | 5215  | 450.59  | 14.30023 | 3 R.ISSLSVVE chrX@1634   | 1.45E-10 | 0.001318 |

|            |       |         |          |                         |          |          |
|------------|-------|---------|----------|-------------------------|----------|----------|
| 24Mar2011  | 3493  | 450.59  | 14.30023 | 3 R.ISSLSVVE chrX@1634  | 9.32E-11 | 0.001278 |
| 24Mar2011  | 3993  | 450.59  | 14.30023 | 3 R.ISSLSVVE chrX@1634  | 1.06E-11 | 0        |
| 26July2011 | 5055  | 698.35  | -5.57407 | 3 K.RKINGEK chrX@1574   | 9.67E-11 | 0.005674 |
| 24Mar2011  | 8953  | 512     | 18.44807 | 3 K.EK+14.01 Splice@chr | 6.11E-10 | 0.008128 |
| 26July2011 | 9346  | 622.67  | 25.9858  | 3 K.SETSKKTS chr5@1386  | 2.38E-10 | 0.007403 |
| 29Nov2011  | 3115  | 541.8   | -25.5845 | 2 K.RCLHALR Splice@chr  | 2.38E-10 | 0.007692 |
| 29Nov2011  | 3168  | 541.8   | -25.5845 | 2 K.RCLHALR Splice@chr  | 1.74E-10 | 0.006202 |
| 29Nov2011  | 2882  | 541.8   | -25.5845 | 2 K.RCLHALR Splice@chr  | 1.45E-10 | 0.004974 |
| 29Nov2011  | 3339  | 541.8   | -25.5845 | 2 K.RCLHALR Splice@chr  | 2.06E-10 | 0.005944 |
| 29Nov2011  | 3595  | 541.8   | -25.5845 | 2 K.RCLHALR Splice@chr  | 2.97E-10 | 0.008427 |
| 29Nov2011  | 3932  | 541.8   | -25.5845 | 2 K.RCLHALR Splice@chr  | 1.03E-10 | 0.003246 |
| 29Nov2011  | 3957  | 541.8   | -25.5845 | 2 K.RCLHALR Splice@chr  | 1.61E-10 | 0.004691 |
| 29Nov2011  | 3125  | 541.8   | -25.5845 | 2 K.RCLHALR Splice@chr  | 1.67E-10 | 0.004477 |
| 29Nov2011  | 2939  | 541.8   | -25.5845 | 2 K.RCLHALR Splice@chr  | 1.60E-10 | 0.005998 |
| 29Nov2011  | 2104  | 541.8   | -25.5845 | 2 K.RCLHALR Splice@chr  | 1.80E-10 | 0.006971 |
| 29Nov2011  | 13912 | 801.46  | -17.5994 | 4 _RK+14.01 Splice@chr  | 4.46E-11 | 0.001451 |
| 29Nov2011  | 4279  | 518.01  | -14.4971 | 4 K.DLEKSSM Splice@chr  | 1.09E-10 | 0.002834 |
| 29Nov2011  | 5202  | 518.01  | -14.4971 | 4 K.DLEKSSM Splice@chr  | 1.04E-10 | 0.00316  |
| 29Nov2011  | 5088  | 518.01  | -14.4971 | 4 K.DLEKSSM Splice@chr  | 8.68E-11 | 0.002309 |
| 29Nov2011  | 3918  | 518.01  | -14.4971 | 4 K.DLEKSSM Splice@chr  | 2.73E-11 | 0.002375 |
| 29Nov2011  | 4919  | 518.01  | -14.4971 | 4 K.DLEKSSM Splice@chr  | 2.55E-10 | 0.009877 |
| 29Nov2011  | 5071  | 517.76  | -12.8742 | 4 K.DLEKSSM Splice@chr  | 2.25E-11 | 8.34E-04 |
| 29Nov2011  | 4998  | 518.01  | -14.4971 | 4 K.DLEKSSM Splice@chr  | 7.48E-12 | 5.10E-04 |
| 29Nov2011  | 3348  | 518.01  | -14.4971 | 4 K.DLEKSSM Splice@chr  | 1.75E-10 | 0.00648  |
| 29Nov2011  | 2955  | 518.01  | -14.4971 | 4 K.DLEKSSM Splice@chr  | 1.40E-10 | 0.005127 |
| 24Mar2011  | 11923 | 776.46  | -9.05147 | 1 K.NVFVAVk chrX@4651   | 3.79E-10 | 0.008174 |
| 24Mar2011  | 11974 | 776.46  | -9.05147 | 1 K.NVFVAVk chrX@4651   | 3.79E-10 | 0.008174 |
| 24Mar2011  | 18011 | 973.76  | -16.4269 | 4 R.FFQRK+1 chr4@6906   | 1.86E-10 | 0.005582 |
| 29Nov2011  | 13129 | 1020.16 | -13.3985 | 3 R.QQSPENC Splice@chr  | 3.52E-13 | 2.55E-04 |
| 29Nov2011  | 13110 | 1019.83 | -9.02599 | 3 R.QQSPENC Splice@chr  | 6.26E-11 | 0.002026 |
| 29Nov2011  | 15972 | 1019.83 | -9.02599 | 3 R.QQSPENC Splice@chr  | 1.81E-10 | 0.003639 |
| 29Nov2011  | 16006 | 1019.83 | -9.02599 | 3 R.QQSPENC Splice@chr  | 2.18E-10 | 0.004777 |
| 29Nov2011  | 14107 | 1019.83 | -9.02599 | 3 R.QQSPENC Splice@chr  | 1.46E-10 | 0.00605  |
| 29Nov2011  | 14796 | 1019.83 | -9.02599 | 3 R.QQSPENC Splice@chr  | 2.52E-10 | 0.009877 |
| 29Nov2011  | 14793 | 1019.83 | -9.02599 | 3 R.QQSPENC Splice@chr  | 3.73E-11 | 0.001453 |
| 29Nov2011  | 16742 | 1020.16 | -13.3985 | 3 R.QQSPENC Splice@chr  | 3.72E-11 | 0.001365 |
| 29Nov2011  | 16784 | 1019.83 | -9.02599 | 3 R.QQSPENC Splice@chr  | 1.89E-10 | 0.005643 |
| 29Nov2011  | 14536 | 1020.16 | -13.3985 | 3 R.QQSPENC Splice@chr  | 1.92E-10 | 0.00567  |
| 29Nov2011  | 13287 | 1019.83 | -9.02599 | 3 R.QQSPENC Splice@chr  | 6.62E-11 | 0.002264 |
| 29Nov2011  | 10243 | 1019.83 | -9.02599 | 3 R.QQSPENC Splice@chr  | 4.97E-11 | 0.002015 |
| 29Nov2011  | 11815 | 1019.83 | -9.02599 | 3 R.QQSPENC Splice@chr  | 5.66E-11 | 0.004699 |
| 29Nov2011  | 10861 | 1020.17 | -3.57375 | 3 R.QQSPENC Splice@chr  | 1.09E-10 | 0.00706  |
| 29Nov2011  | 16195 | 1019.83 | -9.02599 | 3 R.QQSPENC Splice@chr  | 5.19E-12 | 1.74E-04 |
| 24Mar2011  | 1193  | 416.56  | -20.1707 | 3 K.KIAEAGM chr3@1107   | 3.82E-10 | 0.008725 |
| 24Mar2011  | 10609 | 713.12  | -22.8699 | 4 K.VYM+15. chr5@1037   | 7.07E-10 | 0.008772 |
| 24Mar2011  | 2076  | 487.3   | -6.78235 | 2 _KSRVVDII chr1@1484   | 8.36E-11 | 9.28E-04 |
| 29Nov2011  | 10100 | 864.49  | 21.53777 | 2 R.LICLVSKN Splice@chr | 3.24E-10 | 0.00743  |

|            |       |         |          |                         |          |          |
|------------|-------|---------|----------|-------------------------|----------|----------|
| 26July2011 | 9287  | 662.04  | 0.061555 | 3 R.FHHRK+1 Splice@chr  | 2.42E-10 | 0.00641  |
| 29Nov2011  | 5440  | 702.35  | -16.0126 | 2 R.KKDFM+ chr2@5492    | 2.22E-10 | 0.007227 |
| 26July2011 | 4630  | 635.39  | 22.80276 | 2 K.LNFNKKC chr1@5075   | 1.67E-10 | 0.009045 |
| 24Mar2011  | 16454 | 1077.19 | -24.4125 | 3 R.LRHRK+1 Splice@chr  | 2.21E-10 | 0.00427  |
| 24Mar2011  | 11515 | 1077.19 | -24.4125 | 3 R.LRHRK+1 Splice@chr  | 8.28E-12 | 1.78E-04 |
| 26July2011 | 3596  | 464.26  | -0.59289 | 4 K.K+14.016 chr4@6620  | 6.84E-11 | 0.002963 |
| 29Nov2011  | 4184  | 593.34  | -11.2315 | 2 R.LPRLPRD Splice@chr  | 1.97E-10 | 0.00847  |
| 24Mar2011  | 10842 | 865.95  | -24.3445 | 2 K.TFVNFA chr2@5241    | 6.13E-10 | 0.005353 |
| 24Mar2011  | 11533 | 716.37  | -10.0789 | 1 K.TAQNGPI chr4@3056   | 4.05E-10 | 0.008031 |
| 24Mar2011  | 9351  | 869.98  | -2.66905 | 2 F.FPVFSIRE Splice@chr | 6.34E-10 | 0.007851 |
| 26July2011 | 5727  | 633.34  | -4.72965 | 4 K.MSELKM chr5@1818    | 8.79E-11 | 0.002979 |
| 24Mar2011  | 9024  | 735.37  | -1.82849 | 2 K.EETHLK+ chr2@2034   | 1.70E-10 | 0.001917 |
| 26July2011 | 6592  | 584.7   | -20.5639 | 5 K.SINWRG chr4@1536    | 3.84E-11 | 0.0026   |
| 26July2011 | 3026  | 403.72  | 15.91408 | 2 K.MLASSA chr5@1245    | 2.20E-10 | 0.008596 |
| 26July2011 | 3344  | 403.72  | 15.91408 | 2 K.MLASSA chr5@1245    | 1.81E-10 | 0.00673  |
| 29Nov2011  | 5030  | 563.62  | 1.518797 | 3 R.LGTTSET chrX@3862   | 1.13E-10 | 0.00607  |
| 26July2011 | 1829  | 456.57  | -20.3329 | 3 K.KM+15.9 chr3@1225   | 7.73E-11 | 0.001647 |
| 29Nov2011  | 7240  | 856.4   | -13.2002 | 2 R.SDQVSG chr3@9346    | 2.28E-10 | 0.007156 |
| 29Nov2011  | 8788  | 812.9   | -5.52753 | 2 K.KTNAETD chrX@6958   | 1.80E-11 | 0.001705 |
| 24Mar2011  | 9572  | 663.92  | -14.455  | 2 K.IQPGFK+ chrX@1591   | 4.94E-10 | 0.009905 |
| 29Nov2011  | 7271  | 467.24  | 6.948136 | 2 K.ACINEIGF chr2@3915  | 5.58E-11 | 0.001803 |
| 24Mar2011  | 9759  | 870.43  | -24.6884 | 2 K.IFFYRSSN chr2@1258  | 1.13E-10 | 0.002374 |
| 24Mar2011  | 5103  | 954.54  | 5.797072 | 2 K.IFRIQVVY chr3@5850  | 2.19E-10 | 0.004376 |
| 24Mar2011  | 4656  | 1051.56 | -17.7777 | 1 K.YVEKTGN chr4@1570   | 3.95E-10 | 0.006976 |
| 24Mar2011  | 6731  | 860.42  | -24.7142 | 1 K.NPTNRM Splice@chr   | 4.62E-10 | 0.00942  |
| 26July2011 | 4163  | 875.7   | -22.6777 | 4 K.FYNSHLIS Splice@chr | 3.50E-11 | 0.001761 |
| 26July2011 | 4137  | 588.99  | 16.95501 | 3 K.KIFQTDIT chr2@2447  | 1.20E-10 | 0.004432 |
| 24Mar2011  | 6019  | 823.18  | -3.47095 | 4 R.K+14.016 chr5@1926  | 8.35E-11 | 0.001019 |
| 24Mar2011  | 11667 | 889.5   | 13.53314 | 2 F.KCRKMVI Splice@chr  | 7.08E-10 | 0.008772 |
| 29Nov2011  | 6545  | 562.98  | -8.76104 | 3 R.IRSEK+14 chr5@6128  | 1.94E-10 | 0.005357 |
| 29Nov2011  | 10179 | 821.42  | -21.9212 | 2 K.FTEITNEV Splice@chr | 1.94E-13 | 0        |
| 29Nov2011  | 12495 | 820.92  | -19.8754 | 2 K.FTEITNEV Splice@chr | 1.05E-12 | 3.58E-04 |
| 29Nov2011  | 12268 | 820.92  | -19.8754 | 2 K.FTEITNEV Splice@chr | 7.27E-15 | 0        |
| 24Mar2011  | 8778  | 1113.55 | -18.1731 | 1 K.PTFPVLEF chr2@2337  | 8.60E-11 | 0.003811 |
| 29Nov2011  | 1093  | 560.8   | -5.07258 | 2 R.SSMVGR chrX@1738    | 6.43E-11 | 0.003029 |
| 29Nov2011  | 1171  | 560.8   | -5.07258 | 2 R.SSMVGR chrX@1738    | 3.11E-10 | 0.008678 |
| 29Nov2011  | 1334  | 560.8   | -5.07258 | 2 R.SSMVGR chrX@1738    | 1.91E-10 | 0.006454 |
| 29Nov2011  | 1593  | 560.8   | -5.07258 | 2 R.SSMVGR chrX@1738    | 1.78E-10 | 0.00529  |
| 29Nov2011  | 1836  | 560.8   | -5.07258 | 2 R.SSMVGR chrX@1738    | 2.58E-10 | 0.006934 |
| 24Mar2011  | 10718 | 808.43  | 19.02505 | 2 Y.VYFTHHA chr1@1129   | 5.76E-10 | 0.009117 |
| 24Mar2011  | 4979  | 1074.52 | -7.05004 | 2 K.QENFQE chrX@1450    | 1.44E-10 | 0.002679 |
| 26July2011 | 3586  | 672.62  | -17.5223 | 4 F.IFAGQRT chrX@7066   | 1.01E-10 | 0.006068 |
| 26July2011 | 2957  | 672.37  | -16.2731 | 4 F.IFAGQRT chrX@7066   | 1.12E-11 | 0.002227 |
| 26July2011 | 1289  | 678.34  | -8.14294 | 3 K.DDAGM+ Splice@chr   | 7.17E-11 | 0.005503 |
| 24Mar2011  | 1180  | 409.23  | -22.327  | 3 R.LSHALSG chr1@5436   | 2.87E-10 | 0.005841 |
| 29Nov2011  | 13336 | 1092.06 | -15.9774 | 2 K.VQYLMAI chr5@2035   | 1.57E-10 | 0.004417 |
| 29Nov2011  | 12726 | 1092.05 | -25.1559 | 2 K.VQYLMAI chr5@2035   | 1.16E-10 | 0.004065 |

|            |       |         |          |                          |          |          |
|------------|-------|---------|----------|--------------------------|----------|----------|
| 29Nov2011  | 12714 | 1092.06 | -15.9774 | 2 K.VQYLMAI chr5@2035    | 1.45E-10 | 0.003957 |
| 29Nov2011  | 13824 | 1092.06 | -15.9774 | 2 K.VQYLMAI chr5@2035    | 4.66E-11 | 0.001912 |
| 24Mar2011  | 2     | 430.89  | 27.64419 | 5 R.KERKLWF chr5@1138    | 2.15E-10 | 0.003879 |
| 29Nov2011  | 8560  | 1335.58 | 0.02368  | 2 _..IESSYDKE Splice@chr | 2.48E-15 | 0        |
| 29Nov2011  | 10231 | 1335.58 | 0.02368  | 2 _..IESSYDKE Splice@chr | 8.30E-11 | 0.002247 |
| 29Nov2011  | 10178 | 1335.08 | 1.28103  | 2 _..IESSYDKE Splice@chr | 2.20E-17 | 0        |
| 29Nov2011  | 10157 | 1335.58 | 0.02368  | 2 _..IESSYDKE Splice@chr | 6.78E-15 | 0        |
| 29Nov2011  | 949   | 630.26  | 18.52664 | 1 R.GGDGGG chr1@1068     | 1.18E-10 | 0.005537 |
| 29Nov2011  | 2797  | 1056.53 | -27.9697 | 2 I.RLISASAH chr5@3149   | 2.15E-10 | 0.005945 |
| 29Nov2011  | 3590  | 1056.53 | -27.9697 | 2 I.RLISASAH chr5@3149   | 8.25E-11 | 0.002584 |
| 24Mar2011  | 4969  | 860.48  | -4.82898 | 1 R.NGSLLQT Splice@chr   | 6.35E-10 | 0.009656 |
| 24Mar2011  | 146   | 615.38  | -8.14627 | 2 K.IEILKFPKI chr2@1477  | 9.58E-11 | 0.002433 |
| 26July2011 | 404   | 491.92  | -26.2494 | 3 R.YK+14.01 chr1@7957   | 1.50E-10 | 0.008959 |
| 26July2011 | 5159  | 527.26  | -10.5928 | 3 R.HSFFPGV chr4@1161    | 2.66E-11 | 0        |
| 29Nov2011  | 1865  | 498.31  | 3.933582 | 2 K.NLALLPP chr5@1112    | 6.29E-11 | 0.001385 |
| 26July2011 | 5678  | 681.01  | -16.5521 | 3 R.MDDISAE chr1@7675    | 1.78E-10 | 0.008495 |
| 26July2011 | 3420  | 467.28  | -11.9118 | 2 _..LLGYGVR Splice@chr  | 1.98E-10 | 0.004837 |
| 26July2011 | 7193  | 719.71  | -2.8028  | 3 _..KPKFSDTI chrX@1260  | 1.75E-10 | 0.004775 |
| 29Nov2011  | 5902  | 843.46  | -10.4326 | 1 R.TSAAPAG Splice@chr   | 3.33E-12 | 0        |
| 29Nov2011  | 5211  | 843.46  | -10.4326 | 1 R.TSAAPAG Splice@chr   | 3.33E-12 | 4.31E-04 |
| 29Nov2011  | 6996  | 843.46  | -10.4326 | 1 R.TSAAPAG Splice@chr   | 9.48E-11 | 0.002811 |
| 29Nov2011  | 5545  | 843.46  | -10.4326 | 1 R.TSAAPAG Splice@chr   | 1.66E-12 | 4.94E-04 |
| 29Nov2011  | 6319  | 843.46  | -10.4326 | 1 R.TSAAPAG Splice@chr   | 1.66E-12 | 4.73E-04 |
| 29Nov2011  | 6370  | 843.46  | -10.4326 | 1 R.TSAAPAG Splice@chr   | 1.22E-10 | 0.005587 |
| 29Nov2011  | 5929  | 843.46  | -10.4326 | 1 R.TSAAPAG Splice@chr   | 2.01E-12 | 2.88E-04 |
| 29Nov2011  | 5884  | 843.46  | -10.4326 | 1 R.TSAAPAG Splice@chr   | 1.69E-10 | 0.00716  |
| 29Nov2011  | 7101  | 843.46  | -10.4326 | 1 R.TSAAPAG Splice@chr   | 4.02E-12 | 6.23E-04 |
| 24Mar2011  | 3212  | 793.91  | -15.3182 | 2 R.KCYDIPY5 chr5@1476   | 1.78E-10 | 0.005389 |
| 29Nov2011  | 12722 | 531.27  | 16.65195 | 3 K.VCIEFEFP chrX@1228   | 9.28E-11 | 0.002517 |
| 24Mar2011  | 10440 | 534.26  | 9.729054 | 2 R.YNCPLCLi chr2@1691   | 2.14E-10 | 0.007017 |
| 24Mar2011  | 21019 | 983.53  | 7.969648 | 4 ?.VTLTLM+ Splice@chr   | 1.92E-10 | 0.004966 |
| 24Mar2011  | 7868  | 707.41  | -23.3865 | 2 K.FHK+14.C Splice@chr  | 6.92E-10 | 0.008383 |
| 24Mar2011  | 10462 | 690.43  | 23.08118 | 2 R.ALNSEPR Splice@chr   | 2.72E-10 | 0.00417  |
| 26July2011 | 2820  | 914.78  | -5.58972 | 3 R.FMACKHi chr2@7207    | 1.25E-10 | 0.00721  |
| 29Nov2011  | 1451  | 713.4   | -28.8481 | 2 _..KK+14.01 chr1@1383  | 1.42E-10 | 0.005277 |
| 26July2011 | 3966  | 697.85  | -4.35829 | 4 _..QVPITTG: chr3@7532  | 9.23E-12 | 0        |
| 29Nov2011  | 9234  | 545.29  | -1.53219 | 3 R.K+14.016 Splice@chr  | 1.31E-10 | 0.003999 |
| 29Nov2011  | 20974 | 1126.62 | -26.2109 | 1 K.IFKWYINI chrX@1536   | 2.73E-10 | 0.007749 |
| 24Mar2011  | 6737  | 670.37  | -12.3097 | 2 R.WTNLLH5 chr2@3229    | 1.89E-10 | 0.002086 |
| 24Mar2011  | 6684  | 670.37  | -12.3097 | 2 R.WTNLLH5 chr2@3229    | 3.67E-10 | 0.005538 |
| 24Mar2011  | 6590  | 670.37  | -12.3097 | 2 R.WTNLLH5 chr2@3229    | 5.47E-10 | 0.005065 |
| 24Mar2011  | 6577  | 670.36  | -27.2637 | 2 R.WTNLLH5 chr2@3229    | 1.12E-10 | 0.001144 |
| 24Mar2011  | 7565  | 552.35  | -19.3329 | 2 K.KVPKSIFR chr4@5399   | 7.84E-11 | 0.002061 |
| 26July2011 | 4361  | 780.72  | -9.89249 | 3 R.HFVDSIVi Splice@chr  | 2.06E-10 | 0.008403 |
| 29Nov2011  | 16096 | 931.5   | -14.5357 | 2 L.QCPLFNS Splice@chr   | 2.61E-10 | 0.007753 |
| 29Nov2011  | 14934 | 780.63  | 15.99644 | 4 R.ESLAHYG chr3@4957    | 1.70E-10 | 0.004417 |
| 24Mar2011  | 4931  | 871.45  | 14.1387  | 2 _..FPRDDAT chr5@9452   | 3.66E-10 | 0.00962  |

|            |       |         |          |                        |          |          |
|------------|-------|---------|----------|------------------------|----------|----------|
| 26July2011 | 1102  | 415.21  | -21.857  | 4 _FSKYIEPN chr5@1568  | 8.42E-11 | 0.002586 |
| 24Mar2011  | 8214  | 711.96  | -14.766  | 5 K.YSFFFPGL chr3@2650 | 2.68E-10 | 0.003336 |
| 26July2011 | 4337  | 749.71  | -9.45638 | 3 K.NFPKSVR chr2@2434  | 2.66E-10 | 0.009836 |
| 29Nov2011  | 3797  | 466.25  | 7.937062 | 2 R.ESLANIEF chr3@5627 | 1.07E-10 | 0.003277 |
| 26July2011 | 5831  | 855.98  | -18.7748 | 2 K.K+14.016 chrX@1156 | 4.05E-11 | 0.001133 |
| 29Nov2011  | 17356 | 1111.64 | -7.99858 | 2 Q.KLPISHKI chr5@1528 | 2.51E-10 | 0.007795 |
| 26July2011 | 75    | 411.92  | 21.26011 | 3 K.QKPK+14 chr2@2987  | 5.35E-12 | 0        |
| 24Mar2011  | 9659  | 1033.5  | -25.7732 | 2 K.TGSLYVV chr3@1280  | 4.48E-11 | 2.17E-04 |
| 29Nov2011  | 15463 | 984     | 21.83777 | 2 L.GVFFSDP chr1@1363  | 1.48E-10 | 0.004752 |
| 26July2011 | 3286  | 855.11  | -19.6106 | 3 K.LCQFSRN chr4@1284  | 1.56E-10 | 0.008674 |
| 29Nov2011  | 13813 | 1034.52 | 4.639212 | 2 _RSTACTN chr5@1812   | 2.59E-10 | 0.006213 |
| 24Mar2011  | 3269  | 758.92  | -4.47097 | 2 C.RGQKEEF chr1@5362  | 1.48E-10 | 0.002192 |
| 24Mar2011  | 5887  | 758.92  | -4.47097 | 2 C.RGQKEEF chr1@5362  | 7.73E-11 | 0.002478 |
| 24Mar2011  | 3535  | 758.92  | -4.47097 | 2 C.RGQKEEF chr1@5362  | 1.93E-11 | 4.47E-04 |
| 24Mar2011  | 2829  | 758.92  | -4.47097 | 2 C.RGQKEEF chr1@5362  | 2.29E-11 | 0        |
| 24Mar2011  | 3473  | 758.92  | -4.47097 | 2 C.RGQKEEF chr1@5362  | 2.45E-11 | 0        |
| 24Mar2011  | 3265  | 758.92  | -4.47097 | 2 C.RGQKEEF chr1@5362  | 1.45E-10 | 0.00104  |
| 24Mar2011  | 3311  | 758.92  | -4.47097 | 2 C.RGQKEEF chr1@5362  | 2.52E-10 | 0.004609 |
| 24Mar2011  | 6698  | 758.92  | -4.47097 | 2 C.RGQKEEF chr1@5362  | 2.14E-10 | 0.006128 |
| 26July2011 | 4370  | 1010.85 | 1.12822  | 3 K.YAKIHIFP chr3@2188 | 1.61E-10 | 0.006651 |
| 24Mar2011  | 14268 | 1142.58 | -8.98219 | 2 A.HVQEVAL Splice@chr | 6.62E-10 | 0.008099 |
| 24Mar2011  | 1679  | 472.26  | 0.841861 | 2 K.TLHGVNF chr2@4292  | 2.73E-11 | 2.22E-04 |
| 29Nov2011  | 18513 | 1277.59 | -1.38594 | 1 _SK+14.01 chr4@7491  | 1.89E-10 | 0.005184 |
| 29Nov2011  | 15320 | 1070    | 1.857498 | 2 K.CTWRCSC chr5@1691  | 2.14E-10 | 0.005284 |
| 26July2011 | 7487  | 745.07  | -22.9498 | 3 K.KKEQEAS chr2@1235  | 5.00E-11 | 0.001936 |
| 24Mar2011  | 11599 | 1151.08 | -11.2283 | 2 K.GK+14.01 chr4@1616 | 1.95E-10 | 0.006789 |
| 26July2011 | 1183  | 645.32  | 10.85673 | 2 _TDKWICY Splice@chr  | 4.33E-11 | 0.008499 |
| 29Nov2011  | 12752 | 916.51  | -3.80009 | 2 K.FLK+14.0 chr4@3905 | 1.55E-10 | 0.004361 |
| 24Mar2011  | 2938  | 681.35  | -28.0792 | 2 R.RFQERRV chr4@1682  | 1.44E-10 | 0.001778 |
| 29Nov2011  | 9944  | 597.01  | -5.08787 | 3 K.LILLMME chr1@4668  | 1.62E-10 | 0.004691 |
| 29Nov2011  | 7166  | 800.39  | -26.6236 | 2 _FRIFDATS Splice@chr | 1.43E-10 | 0.004906 |
| 24Mar2011  | 11385 | 1083.24 | -8.63075 | 3 Q.GKNHAG Splice@chr  | 3.02E-10 | 0.005527 |
| 29Nov2011  | 17099 | 763.89  | -23.1881 | 4 _SLCMSLL chr5@1716   | 3.45E-11 | 0.001161 |
| 24Mar2011  | 1440  | 447.23  | -20.6081 | 3 R.IFWLK GK chr2@3338 | 4.07E-11 | 0.003636 |
| 26July2011 | 2665  | 524.29  | 29.0051  | 3 R.LMM+15 chr4@7139   | 1.10E-10 | 0.001594 |
| 26July2011 | 6131  | 853.98  | -11.0605 | 2 K.M+15.99 chrX@1018  | 6.95E-11 | 0.002962 |
| 24Mar2011  | 3419  | 562.33  | 14.0366  | 3 R.VVVVVV chr4@2433   | 3.23E-10 | 0.006174 |
| 29Nov2011  | 4588  | 1053.52 | -12.6177 | 2 _SSELSAID chr2@9530  | 2.62E-10 | 0.009365 |
| 29Nov2011  | 13817 | 759.75  | -26.4756 | 3 R.LPAAIVK chrX@3691  | 9.82E-11 | 0.003569 |
| 24Mar2011  | 5991  | 585.33  | -20.0549 | 2 K.LFCKTVLF chr3@1104 | 5.00E-10 | 0.009875 |
| 24Mar2011  | 2161  | 585.34  | -2.92467 | 2 K.LFCKTVLF chr3@1104 | 4.45E-10 | 0.008767 |
| 24Mar2011  | 1259  | 402.72  | 27.27353 | 2 K.VIDGDGT chrX@1623  | 4.93E-11 | 0.001358 |
| 24Mar2011  | 964   | 402.72  | 27.27353 | 2 K.VIDGDGT chrX@1623  | 1.70E-10 | 0.002013 |
| 24Mar2011  | 1462  | 402.72  | 27.27353 | 2 K.VIDGDGT chrX@1623  | 5.09E-12 | 0        |
| 24Mar2011  | 8367  | 912.44  | 20.0233  | 2 K.RCEEPDH chr1@1163  | 3.44E-10 | 0.004542 |
| 29Nov2011  | 3120  | 768.35  | -21.5551 | 2 R.K+14.016 chr4@1634 | 4.98E-11 | 0.002589 |
| 29Nov2011  | 434   | 568.8   | -0.48227 | 2 K.NQKTKN chr2@3791   | 8.10E-11 | 0.005262 |

|            |       |         |          |                         |          |          |
|------------|-------|---------|----------|-------------------------|----------|----------|
| 29Nov2011  | 430   | 568.81  | 17.16259 | 2 K.NQKTKN chr2@3791    | 1.16E-10 | 0.007835 |
| 26July2011 | 4903  | 748.06  | -10.5431 | 3 K.FFSYIFTL chr3@3024  | 1.29E-10 | 0.006089 |
| 29Nov2011  | 1993  | 900.5   | -14.6974 | 2 _SK+14.01 chr4@2326   | 1.40E-10 | 0.004461 |
| 24Mar2011  | 17070 | 997.06  | 4.445923 | 2 F.HGTMKN Splice@chr   | 4.90E-10 | 0.009671 |
| 26July2011 | 5731  | 553.63  | 2.985164 | 3 K.EVIDDWL chr4@5806   | 1.77E-11 | 0        |
| 24Mar2011  | 1128  | 473.74  | -24.9825 | 2 R.AVEAGSF chr4@1069   | 1.70E-11 | 0.003396 |
| 29Nov2011  | 19679 | 545.82  | 18.37321 | 2 R.RANNLFS chrX@3308   | 2.59E-10 | 0.007628 |
| 29Nov2011  | 18463 | 545.82  | 18.37321 | 2 R.RANNLFS chrX@3308   | 1.22E-10 | 0.003693 |
| 29Nov2011  | 18477 | 545.82  | 18.37321 | 2 R.RANNLFS chrX@3308   | 1.78E-10 | 0.004736 |
| 29Nov2011  | 19797 | 545.82  | 18.37321 | 2 R.RANNLFS chrX@3308   | 1.61E-11 | 0.001017 |
| 26July2011 | 9154  | 704.66  | -4.94552 | 3 K.AK+14.01 Splice@chr | 1.44E-10 | 0.003599 |
| 26July2011 | 50    | 575.28  | -26.5699 | 3 K.RMKEVPI chr4@2116   | 7.93E-11 | 0.002586 |
| 24Mar2011  | 4673  | 760.02  | -17.9926 | 3 R.QGLEVLD Splice@chr  | 6.04E-10 | 0.009087 |
| 24Mar2011  | 9965  | 1090.06 | 25.55685 | 2 _PSDVL RP Splice@chr  | 5.96E-10 | 0.008008 |
| 29Nov2011  | 11965 | 792.94  | 2.199282 | 2 K.SKNM+1! chr3@1942   | 3.46E-10 | 0.007906 |
| 26July2011 | 999   | 570.84  | -8.14035 | 2 K.VLK+14.0 Splice@chr | 6.26E-11 | 0.005503 |
| 26July2011 | 505   | 570.84  | -8.14035 | 2 K.VLK+14.0 Splice@chr | 1.63E-12 | 0        |
| 26July2011 | 5160  | 787.42  | -29.4034 | 4 _NFEKSIIEI chr5@2010  | 8.35E-11 | 0.003135 |
| 24Mar2011  | 4755  | 720.82  | -7.46174 | 2 K.CVEDYRC chr5@7527   | 5.03E-12 | 0        |
| 24Mar2011  | 21714 | 1075.06 | -3.63691 | 2 R.KNSNFRV chr2@1512   | 3.73E-10 | 0.00793  |
| 24Mar2011  | 2234  | 550.3   | -17.3338 | 2 R.EGAEPV chr5@6458    | 6.18E-10 | 0.009375 |
| 29Nov2011  | 10684 | 783.93  | -26.0373 | 2 K.TIFKMK+ chr5@1467   | 2.86E-10 | 0.008293 |
| 29Nov2011  | 170   | 499.3   | -17.8989 | 2 R.RARDLLP Splice@chr  | 1.47E-10 | 0.006162 |
| 24Mar2011  | 7244  | 537.3   | 10.66826 | 3 _KPEISKLF chr3@1289   | 1.17E-10 | 0.002433 |
| 29Nov2011  | 17566 | 1287.29 | 16.47055 | 3 R.TFDDVLY Splice@chr  | 1.71E-11 | 7.79E-04 |
| 29Nov2011  | 17639 | 1286.96 | 19.87157 | 3 R.TFDDVLY Splice@chr  | 1.30E-10 | 0.004109 |
| 29Nov2011  | 17668 | 1287.3  | 24.25464 | 3 R.TFDDVLY Splice@chr  | 4.05E-14 | 0        |
| 29Nov2011  | 17607 | 1287.29 | 16.47055 | 3 R.TFDDVLY Splice@chr  | 2.50E-13 | 2.06E-04 |
| 26July2011 | 131   | 412.46  | -27.8873 | 4 R.KKLQCVY chr4@3106   | 1.37E-10 | 0.003868 |
| 26July2011 | 3403  | 710.69  | -8.82962 | 3 R.FSYSNPN chr1@1385   | 1.47E-10 | 0.007435 |
| 24Mar2011  | 7348  | 551.29  | 26.7315  | 2 Y.PDSIDAL Splice@chr  | 9.42E-11 | 0.003425 |
| 24Mar2011  | 1717  | 713.06  | -21.1431 | 3 K.TKIK+14.1 chrX@3026 | 2.56E-10 | 0.002962 |
| 24Mar2011  | 2002  | 713.06  | -21.1431 | 3 K.TKIK+14.1 chrX@3026 | 4.42E-10 | 0.008767 |
| 24Mar2011  | 1704  | 713.06  | -21.1431 | 3 K.TKIK+14.1 chrX@3026 | 1.43E-10 | 0.002709 |
| 24Mar2011  | 1759  | 713.06  | -21.1431 | 3 K.TKIK+14.1 chrX@3026 | 1.40E-10 | 0.002679 |
| 29Nov2011  | 18062 | 962.02  | -26.9093 | 2 R.HNIWKIR chr2@6350   | 1.45E-10 | 0.003957 |
| 26July2011 | 972   | 751.4   | 14.88502 | 2 K.CEKQTSR chr4@8039   | 1.70E-10 | 0        |
| 29Nov2011  | 13782 | 1325.67 | -4.28668 | 1 R.MFTPLFE Splice@chr  | 4.68E-12 | 4.73E-04 |
| 29Nov2011  | 13744 | 1324.67 | -1.75221 | 1 R.MFTPLFE Splice@chr  | 5.19E-11 | 0.002301 |
| 29Nov2011  | 13753 | 1325.67 | -4.28668 | 1 R.MFTPLFE Splice@chr  | 7.00E-13 | 4.73E-04 |
| 29Nov2011  | 13755 | 663.34  | -2.62669 | 2 R.MFTPLFE Splice@chr  | 2.41E-10 | 0.009535 |
| 29Nov2011  | 13771 | 1324.67 | -1.75221 | 1 R.MFTPLFE Splice@chr  | 7.64E-12 | 4.73E-04 |
| 29Nov2011  | 13555 | 1324.67 | -1.75221 | 1 R.MFTPLFE Splice@chr  | 1.50E-11 | 0.001286 |
| 29Nov2011  | 13569 | 1325.68 | 3.275484 | 1 R.MFTPLFE Splice@chr  | 1.10E-11 | 0.001286 |
| 29Nov2011  | 13591 | 1324.67 | -1.75221 | 1 R.MFTPLFE Splice@chr  | 9.53E-11 | 0.004734 |
| 29Nov2011  | 13787 | 1324.67 | -1.75221 | 1 R.MFTPLFE Splice@chr  | 6.55E-12 | 3.05E-04 |
| 29Nov2011  | 13777 | 1325.66 | -11.8488 | 1 R.MFTPLFE Splice@chr  | 1.07E-10 | 0.003285 |

|            |       |         |          |                         |          |          |
|------------|-------|---------|----------|-------------------------|----------|----------|
| 29Nov2011  | 13864 | 1325.68 | 3.275484 | 1 R.MFTPLFE Splice@chr  | 3.34E-11 | 5.85E-04 |
| 29Nov2011  | 13884 | 1324.67 | -1.75221 | 1 R.MFTPLFE Splice@chr  | 9.58E-11 | 0.002622 |
| 29Nov2011  | 13855 | 1324.67 | -1.75221 | 1 R.MFTPLFE Splice@chr  | 3.21E-13 | 3.05E-04 |
| 29Nov2011  | 13626 | 1324.68 | 5.809954 | 1 R.MFTPLFE Splice@chr  | 1.68E-11 | 8.61E-04 |
| 29Nov2011  | 13694 | 1324.68 | 5.809954 | 1 R.MFTPLFE Splice@chr  | 2.42E-10 | 0.007523 |
| 29Nov2011  | 15580 | 1324.67 | -1.75221 | 1 R.MFTPLFE Splice@chr  | 9.65E-12 | 5.76E-04 |
| 29Nov2011  | 15533 | 1324.67 | -1.75221 | 1 R.MFTPLFE Splice@chr  | 1.99E-12 | 4.50E-04 |
| 29Nov2011  | 14794 | 1324.67 | -1.75221 | 1 R.MFTPLFE Splice@chr  | 6.25E-13 | 1.90E-04 |
| 29Nov2011  | 14757 | 1324.67 | -1.75221 | 1 R.MFTPLFE Splice@chr  | 1.90E-11 | 9.68E-04 |
| 29Nov2011  | 14802 | 1325.67 | -4.28668 | 1 R.MFTPLFE Splice@chr  | 4.47E-12 | 5.10E-04 |
| 29Nov2011  | 14764 | 663.34  | -2.62669 | 2 R.MFTPLFE Splice@chr  | 1.40E-10 | 0.004461 |
| 29Nov2011  | 14761 | 1325.67 | -4.28668 | 1 R.MFTPLFE Splice@chr  | 8.07E-12 | 5.10E-04 |
| 29Nov2011  | 15738 | 1324.67 | -1.75221 | 1 R.MFTPLFE Splice@chr  | 3.45E-12 | 5.00E-04 |
| 29Nov2011  | 15769 | 1324.67 | -1.75221 | 1 R.MFTPLFE Splice@chr  | 1.35E-11 | 7.79E-04 |
| 29Nov2011  | 15806 | 1324.67 | -1.75221 | 1 R.MFTPLFE Splice@chr  | 9.86E-11 | 0.002781 |
| 29Nov2011  | 16300 | 1324.67 | -1.75221 | 1 R.MFTPLFE Splice@chr  | 9.73E-12 | 7.58E-04 |
| 29Nov2011  | 16309 | 1325.68 | 3.275484 | 1 R.MFTPLFE Splice@chr  | 1.90E-13 | 0        |
| 24Mar2011  | 14116 | 793.95  | 28.01897 | 2 K.LLFHQSK Splice@chr  | 1.61E-11 | 1.52E-04 |
| 29Nov2011  | 11254 | 1154.92 | 2.275731 | 3 A.HLEPKTD Splice@chr  | 7.34E-12 | 7.09E-04 |
| 29Nov2011  | 11354 | 1154.59 | 6.066963 | 3 A.HLEPKTD Splice@chr  | 2.27E-11 | 0.001971 |
| 29Nov2011  | 11315 | 1154.59 | 6.066963 | 3 A.HLEPKTD Splice@chr  | 6.71E-12 | 7.09E-04 |
| 29Nov2011  | 15388 | 1122.59 | 18.82926 | 2 R.TFDDVLY Splice@chr  | 2.05E-13 | 2.27E-04 |
| 29Nov2011  | 15418 | 1123.09 | 17.33367 | 2 R.TFDDVLY Splice@chr  | 3.42E-10 | 0.009052 |
| 29Nov2011  | 15468 | 1123.1  | 26.25852 | 2 R.TFDDVLY Splice@chr  | 1.60E-10 | 0.005322 |
| 29Nov2011  | 15429 | 1122.58 | 9.904408 | 2 R.TFDDVLY Splice@chr  | 2.48E-11 | 0.001166 |
| 29Nov2011  | 17420 | 1122.58 | 9.904408 | 2 R.TFDDVLY Splice@chr  | 1.10E-10 | 0.003618 |
| 29Nov2011  | 16392 | 1123.1  | 26.25852 | 2 R.TFDDVLY Splice@chr  | 2.97E-10 | 0.007697 |
| 29Nov2011  | 17709 | 1123.09 | 17.33367 | 2 R.TFDDVLY Splice@chr  | 1.67E-10 | 0.004867 |
| 29Nov2011  | 17612 | 1122.58 | 9.904408 | 2 R.TFDDVLY Splice@chr  | 3.19E-10 | 0.009204 |
| 29Nov2011  | 17673 | 1123.09 | 17.33367 | 2 R.TFDDVLY Splice@chr  | 1.30E-10 | 0.004109 |
| 29Nov2011  | 17642 | 1122.59 | 18.82926 | 2 R.TFDDVLY Splice@chr  | 2.89E-10 | 0.008101 |
| 29Nov2011  | 17589 | 1123.08 | 8.408819 | 2 R.TFDDVLY Splice@chr  | 6.36E-11 | 0.001428 |
| 29Nov2011  | 17555 | 1122.58 | 9.904408 | 2 R.TFDDVLY Splice@chr  | 1.06E-10 | 0.003196 |
| 29Nov2011  | 17712 | 1122.58 | 9.904408 | 2 R.TFDDVLY Splice@chr  | 8.01E-11 | 0.002116 |
| 29Nov2011  | 17676 | 1122.58 | 9.904408 | 2 R.TFDDVLY Splice@chr  | 2.03E-10 | 0.00626  |
| 24Mar2011  | 19661 | 1062.91 | -28.6503 | 3 C.FTKPQK+ chr3@8434   | 1.40E-10 | 0.003449 |
| 29Nov2011  | 9446  | 716.4   | 16.43683 | 2 K.M+15.99 chr2@8495   | 9.24E-11 | 0.003569 |
| 24Mar2011  | 10464 | 708.42  | 10.5442  | 1 R.VGAVAY+ chrX@4596   | 1.99E-10 | 0.004001 |
| 24Mar2011  | 11334 | 708.41  | -3.62589 | 1 R.VGAVAY+ chrX@4596   | 1.12E-10 | 0.001144 |
| 24Mar2011  | 9927  | 734.4   | -23.4413 | 2 R.PEAIAGK Splice@chr  | 5.00E-10 | 0.004907 |
| 24Mar2011  | 10579 | 792.95  | -9.55662 | 2 E.DEEQVK+ chrX@4210   | 3.36E-10 | 0.003496 |
| 24Mar2011  | 10237 | 894.44  | -11.0378 | 2 R.EIWSFCA chr1@1382   | 2.44E-10 | 0.005403 |
| 26July2011 | 1899  | 504.77  | -14.939  | 4 R.RDGSM+ Splice@chr   | 9.93E-11 | 0.006089 |
| 24Mar2011  | 8851  | 968.49  | -26.7355 | 3 R.NYSPK+1 Splice@chr  | 1.82E-10 | 0.003485 |
| 24Mar2011  | 9567  | 953.02  | 1.427428 | 4 _VFNFINK+ chrX@2822   | 3.41E-10 | 0.006684 |
| 24Mar2011  | 18746 | 892.09  | -24.0953 | 3 L.EAEKKPS+ Splice@chr | 4.07E-10 | 0.008586 |
| 26July2011 | 3140  | 675.69  | -24.4059 | 3 K.LFKTSGS+ chrX@1319  | 8.51E-11 | 0.003343 |

|            |       |         |          |                        |          |          |
|------------|-------|---------|----------|------------------------|----------|----------|
| 24Mar2011  | 4716  | 624.34  | -25.4579 | 2 K.IFTGTGIP chr4@756  | 1.76E-10 | 0.006289 |
| 26July2011 | 3129  | 1015.55 | -8.00319 | 3 R.KLK+14.0 chr5@106  | 9.70E-12 | 0.002227 |
| 24Mar2011  | 7333  | 683.34  | 11.23603 | 2 K.KWM+15 chr2@151    | 3.40E-10 | 0.006536 |
| 24Mar2011  | 7299  | 683.34  | 11.23603 | 2 K.KWM+15 chr2@151    | 5.09E-10 | 0.009436 |
| 29Nov2011  | 13241 | 959.5   | -0.73156 | 2 G.SGGGK+ chr2@100    | 1.76E-10 | 0.005313 |
| 29Nov2011  | 7510  | 594.3   | -11.0125 | 3 K.LM+15.9 chr3@129   | 1.75E-10 | 0.00648  |
| 24Mar2011  | 8809  | 963.46  | -29.2623 | 1 K.FPRDNW chr5@115    | 4.24E-10 | 0.008218 |
| 29Nov2011  | 2018  | 686.86  | -18.9227 | 2 _K+14.016 chr2@513   | 2.26E-10 | 0.007388 |
| 24Mar2011  | 2242  | 508.74  | 3.245716 | 2 K.QGSYYGI chr1@395   | 3.96E-10 | 0.008586 |
| 26July2011 | 7446  | 818.43  | -0.6969  | 3 K.NSKYRNK chrX@864   | 8.72E-11 | 0.001743 |
| 26July2011 | 6236  | 527.93  | -17.9639 | 3 R.IEVFGTE chr3@216   | 1.39E-10 | 0.005034 |
| 26July2011 | 4356  | 527.93  | -17.9639 | 3 R.IEVFGTE chr3@216   | 1.76E-10 | 0.007227 |
| 29Nov2011  | 15415 | 1327.65 | 13.83141 | 2 R.IHQAHHF chrX@773   | 3.53E-10 | 0.009653 |
| 29Nov2011  | 11556 | 739.4   | 23.80651 | 2 K.KECIDIDL chrX@101  | 1.53E-10 | 0.006326 |
| 29Nov2011  | 1799  | 623.34  | 13.53452 | 2 _MKSYLES chr4@122    | 2.24E-10 | 0.007388 |
| 26July2011 | 8326  | 826.94  | -19.2606 | 2 R.ASRGRV chrX@448    | 1.32E-10 | 0.007738 |
| 29Nov2011  | 1404  | 637.87  | -17.5379 | 2 R.KETRTGS Splice@chr | 2.91E-10 | 0.008863 |
| 29Nov2011  | 17256 | 1153.96 | -23.3628 | 3 _PNK+14.0 chr1@213   | 2.79E-10 | 0.008293 |
| 24Mar2011  | 2146  | 543.29  | -2.02594 | 2 _ENWEPLF chr2@160    | 4.92E-10 | 0.008927 |
| 26July2011 | 2882  | 537.29  | 21.22192 | 3 K.LSRFMNI chr3@704   | 7.30E-11 | 0.002682 |
| 26July2011 | 3936  | 818.4   | -24.566  | 2 R.QDFYLF Splice@chr  | 2.28E-10 | 0.009289 |
| 26July2011 | 1951  | 721.37  | -9.0283  | 2 Q.MCALGF Splice@chr  | 1.64E-10 | 0.009709 |
| 24Mar2011  | 5568  | 923.51  | 7.420665 | 1 _FGSLLET Splice@chr  | 6.13E-10 | 0.009933 |
| 24Mar2011  | 7529  | 1121.08 | 5.152802 | 2 E.GRKQEH chr3@772    | 2.64E-10 | 0.005215 |
| 29Nov2011  | 17560 | 792.46  | 29.03671 | 1 K.TMLTPK chr1@890    | 3.25E-10 | 0.008907 |
| 29Nov2011  | 8267  | 721.05  | 2.743045 | 3 I.CGFFRHS chr2@147   | 3.19E-10 | 0.009637 |
| 24Mar2011  | 17501 | 910.48  | -10.3603 | 3 _M+15.99 Splice@chr  | 1.01E-11 | 7.25E-04 |
| 29Nov2011  | 14162 | 1004    | -24.8692 | 2 V.HSQKKK chr4@112    | 1.34E-10 | 0.004109 |
| 26July2011 | 4780  | 529.68  | 21.5276  | 3 L.LFLITPRQ chr1@151  | 5.21E-11 | 0.003137 |
| 29Nov2011  | 3072  | 827.88  | 14.73645 | 2 R.STPAAET Splice@chr | 3.92E-15 | 0        |
| 29Nov2011  | 6170  | 554.36  | 0.661805 | 2 K.KNIIARK chr4@153   | 1.58E-10 | 0.004477 |
| 24Mar2011  | 6378  | 1031.02 | -0.56217 | 2 Q.VDLSELN chr5@160   | 4.97E-11 | 0.005333 |
| 24Mar2011  | 6362  | 687.69  | 10.2278  | 3 Q.VDLSELN chr5@160   | 5.19E-11 | 0.00578  |
| 24Mar2011  | 6559  | 436.75  | -3.71189 | 2 R.KGVSAPT Splice@chr | 1.44E-11 | 2.18E-04 |
| 24Mar2011  | 1888  | 436.75  | -3.71189 | 2 R.KGVSAPT Splice@chr | 4.19E-10 | 0.008057 |
| 24Mar2011  | 4082  | 436.75  | -3.71189 | 2 R.KGVSAPT Splice@chr | 3.47E-10 | 0.007791 |
| 24Mar2011  | 2628  | 436.75  | -3.71189 | 2 R.KGVSAPT Splice@chr | 1.46E-10 | 0.001559 |
| 29Nov2011  | 3503  | 606.79  | 23.87934 | 2 F.AENFDSS chr1@448   | 3.47E-10 | 0.009665 |
| 26July2011 | 4930  | 647.92  | 22.17238 | 2 K.KLMKFKR chr5@170   | 1.91E-10 | 0.007937 |
| 29Nov2011  | 2289  | 445.73  | 5.764253 | 2 _DEIESAV chr5@826    | 1.05E-10 | 0.003017 |
| 29Nov2011  | 1914  | 445.73  | 5.764253 | 2 _DEIESAV chr5@826    | 2.07E-10 | 0.006681 |
| 29Nov2011  | 8241  | 1040.68 | 24.89203 | 1 R.NMILPLL chrX@224   | 9.35E-11 | 0.004545 |
| 29Nov2011  | 16329 | 851.46  | -26.4099 | 2 F.SSSVITILS chr1@543 | 7.39E-11 | 0.001825 |
| 24Mar2011  | 1089  | 467.25  | -8.96717 | 2 K.NAISSNI chr5@831   | 8.20E-11 | 0.002576 |
| 24Mar2011  | 17722 | 881.01  | 9.155334 | 2 R.MKIAKKC chr5@512   | 3.98E-10 | 0.0083   |
| 24Mar2011  | 12523 | 881.51  | 7.249192 | 2 R.MKIAKKC chr5@512   | 7.05E-10 | 0.009648 |
| 29Nov2011  | 12620 | 837.92  | 17.86792 | 2 K.CSYEGPH chr4@117   | 1.76E-10 | 0.005607 |

|            |       |         |          |                        |          |          |
|------------|-------|---------|----------|------------------------|----------|----------|
| 26July2011 | 8723  | 708.05  | -25.5514 | 3 R.TK+14.01 chr3@1315 | 2.51E-10 | 0.00885  |
| 26July2011 | 462   | 481.99  | -16.0277 | 4 R.K+14.016 chrX@8894 | 4.47E-11 | 0.004325 |
| 26July2011 | 1749  | 589.78  | 25.29493 | 2 K.NCQLGES chr5@1838  | 1.66E-11 | 0        |
| 29Nov2011  | 4703  | 753.37  | -21.646  | 4 R.HRADMI5 chrX@8625  | 4.69E-11 | 0.003538 |
| 24Mar2011  | 8533  | 1145.67 | -8.31809 | 1 K.LFGLQRG chrX@1291  | 7.41E-10 | 0.009799 |
| 26July2011 | 1360  | 465.25  | 17.46389 | 4 R.VSEISGFF chr3@1162 | 4.07E-11 | 0.003114 |
| 24Mar2011  | 22024 | 1047.03 | 7.002021 | 2 T.YNEPKPP Splice@chr | 8.85E-11 | 0.002787 |
| 24Mar2011  | 7391  | 747.42  | -18.1529 | 2 R.EKVKINA chr5@1797  | 2.11E-10 | 0.002754 |
| 24Mar2011  | 2433  | 686.88  | -26.2242 | 2 K.LEKIVREC chr5@9790 | 2.29E-10 | 0.005248 |
| 29Nov2011  | 1629  | 426.21  | 22.24979 | 2 K.MASSAN5 chr3@1328  | 1.70E-10 | 0.005354 |
| 29Nov2011  | 1981  | 426.21  | 22.24979 | 2 K.MASSAN5 chr3@1328  | 5.41E-11 | 0.001903 |
| 29Nov2011  | 1103  | 426.21  | 22.24979 | 2 K.MASSAN5 chr3@1328  | 3.84E-11 | 0.001743 |
| 24Mar2011  | 605   | 508.6   | -10.9822 | 3 K.K+14.016 chr4@1549 | 1.50E-10 | 0.001348 |
| 29Nov2011  | 11162 | 764.42  | -19.5875 | 2 R.NQKFPAL chr2@1375  | 7.88E-11 | 0.00299  |
| 29Nov2011  | 5072  | 673     | -5.99456 | 3 K.LEQNQVI chr4@8558  | 1.74E-10 | 0.005462 |
| 29Nov2011  | 1779  | 731.42  | 13.78802 | 2 K.AFYFSVFI chrX@2241 | 3.21E-10 | 0.008425 |
| 29Nov2011  | 3100  | 488.25  | -19.3533 | 2 R.ETGIDTL7 chr2@1054 | 2.34E-10 | 0.007024 |
| 24Mar2011  | 5829  | 650.86  | -17.34   | 2 V.FKSVYVA chrX@1335  | 2.94E-10 | 0.003289 |
| 24Mar2011  | 2961  | 538.29  | -18.2475 | 2 R.PKCLSRV Splice@chr | 7.51E-10 | 0.007208 |
| 29Nov2011  | 2726  | 1075.04 | 28.41483 | 2 R.VFFCFLTE chr5@1264 | 1.58E-10 | 0.008411 |
| 24Mar2011  | 2712  | 594.31  | 6.760431 | 3 R.RDPEIASI chr5@2198 | 2.89E-10 | 0.006661 |
| 29Nov2011  | 6691  | 1331.65 | -13.8152 | 1 R.TLRASGA chr5@6244  | 2.41E-10 | 0.006944 |
| 26July2011 | 588   | 720.35  | -6.70299 | 2 K.LIYSENDk chr5@7260 | 9.71E-11 | 0.004902 |
| 29Nov2011  | 14565 | 1235.06 | -3.34705 | 3 K.TIFQRKFL chr3@1076 | 7.17E-11 | 0.003231 |
| 24Mar2011  | 3389  | 451.93  | 8.39216  | 3 K.TFISSK+1 chrX@8535 | 2.26E-10 | 0.002732 |
| 24Mar2011  | 101   | 773.43  | 3.950909 | 1 K.AGGVDA Splice@chr  | 1.35E-10 | 0.005611 |
| 29Nov2011  | 6390  | 761.4   | 25.263   | 2 R.QNPNGT Splice@chr  | 1.91E-10 | 0.005357 |
| 29Nov2011  | 6230  | 530.34  | 0.922448 | 2 K.KMPKKT7 chr4@1398  | 1.94E-10 | 0.006803 |
| 24Mar2011  | 8088  | 949.46  | 23.23175 | 2 R.CQGIDEN Splice@chr | 4.73E-10 | 0.008323 |
| 29Nov2011  | 18194 | 1114.6  | -0.84896 | 2 K.EENNQKI chr4@7121  | 3.02E-10 | 0.00844  |
| 24Mar2011  | 12402 | 688.35  | 8.576978 | 2 K.FLKMMN Splice@chr  | 2.77E-10 | 0.004456 |
| 29Nov2011  | 19002 | 1112.61 | 19.21795 | 1 R.YSRGLSCI chr5@5696 | 1.93E-10 | 0.004736 |
| 26July2011 | 3134  | 628.83  | -29.0536 | 4 K.FWIQLPL chr4@1192  | 1.66E-10 | 0.007718 |
| 24Mar2011  | 9204  | 766.09  | -0.93019 | 3 R.CLSENILS chr3@5861 | 1.47E-10 | 0.008328 |
| 24Mar2011  | 9488  | 766.09  | -0.93019 | 3 R.CLSENILS chr3@5861 | 8.32E-11 | 0.004479 |
| 24Mar2011  | 12125 | 983.54  | 20.39714 | 4 _K.LCKKCA Splice@chr | 4.63E-10 | 0.006632 |
| 26July2011 | 1669  | 584.81  | -11.9183 | 2 K.LKFSSAM chr1@7365  | 2.40E-10 | 0.009915 |
| 29Nov2011  | 13101 | 736.38  | 10.78999 | 2 K.LMTITM+ chrX@5716  | 2.58E-10 | 0.006934 |
| 24Mar2011  | 17680 | 1042.55 | 18.77884 | 3 K.M+15.99 Splice@chr | 7.57E-10 | 0.009461 |
| 24Mar2011  | 8811  | 859.45  | -23.4624 | 2 K.PQFRQFA chr2@1508  | 6.28E-11 | 0.001743 |
| 26July2011 | 501   | 555.31  | 20.33636 | 2 R.RFSKATN chr1@1282  | 9.20E-11 | 0.006813 |
| 26July2011 | 3098  | 939.49  | 2.514733 | 3 K.TM+15.9 chr1@9235  | 1.71E-10 | 0.005065 |
| 24Mar2011  | 12419 | 1041.05 | -21.4583 | 2 R.KEKRK+1. chr5@5196 | 1.36E-10 | 0.007692 |
| 29Nov2011  | 14429 | 1045.18 | 6.235042 | 3 Q.YEDHVQ chr3@7574   | 6.96E-11 | 0.002175 |
| 24Mar2011  | 1256  | 1045.57 | -2.22039 | 1 K.LSFFVSA chr4@1296  | 4.34E-10 | 0.008107 |
| 24Mar2011  | 2202  | 583.3   | -16.8755 | 2 R.GWNKIQ chr3@8881   | 2.94E-10 | 0.005333 |
| 29Nov2011  | 9167  | 595.33  | 16.43181 | 3 R.DECYASK Splice@chr | 3.40E-10 | 0.008573 |

|            |       |         |          |                         |          |          |
|------------|-------|---------|----------|-------------------------|----------|----------|
| 24Mar2011  | 625   | 749.43  | 6.116421 | 2 K.FEKLYKDI chr1@1378  | 2.41E-10 | 0.003779 |
| 24Mar2011  | 720   | 749.43  | 6.116421 | 2 K.FEKLYKDI chr1@1378  | 4.33E-10 | 0.008096 |
| 24Mar2011  | 12043 | 887.48  | -26.4246 | 3 R.KYPLLSPK chrX@1755  | 3.36E-10 | 0.007242 |
| 29Nov2011  | 15567 | 1368.69 | 10.72855 | 3 Y.TLNVNGC Splice@chr  | 6.25E-12 | 3.05E-04 |
| 29Nov2011  | 2386  | 815.93  | -18.3219 | 2 K.KNKKGQI chr5@8214   | 1.76E-10 | 0.004869 |
| 29Nov2011  | 1982  | 815.93  | -18.3219 | 2 K.KNKKGQI chr5@8214   | 1.32E-10 | 0.004088 |
| 26July2011 | 1170  | 571.32  | 4.232936 | 2 K.FNCIALKF chr1@1501  | 9.15E-11 | 0.00189  |
| 24Mar2011  | 6493  | 978.49  | -24.5465 | 3 R.YTSGIDL chr2@1441   | 2.79E-10 | 0.00698  |
| 24Mar2011  | 2273  | 515.77  | -25.0176 | 2 R.VRMGGC chrX@1659    | 3.00E-10 | 0.005841 |
| 26July2011 | 8880  | 675.72  | -9.01928 | 3 R.SRK+14.0 chr2@1420  | 1.89E-10 | 0.005194 |
| 26July2011 | 2047  | 537.05  | 10.50985 | 4 R.IGLHESPC Splice@chr | 1.86E-10 | 0.005588 |
| 29Nov2011  | 5976  | 546.27  | -2.20147 | 3 R.EIEDGVM chrX@5957   | 2.46E-11 | 0.001564 |
| 29Nov2011  | 1061  | 584.34  | -17.8529 | 2 R.NKPESK+ chr4@1705   | 5.20E-11 | 0.003038 |
| 26July2011 | 6414  | 903.49  | 19.27501 | 2 R.YLIK+14.0 chr4@1311 | 5.39E-11 | 0.004926 |
| 26July2011 | 8437  | 675.72  | -1.4772  | 3 R.KNKILDEI chr3@2505  | 2.74E-10 | 0.008006 |
| 29Nov2011  | 10342 | 1123.07 | 20.01795 | 2 _LINVRHV chr5@5345    | 2.69E-10 | 0.006472 |
| 29Nov2011  | 579   | 718.38  | -2.21222 | 1 R.DGIVGEK chr2@6947   | 2.67E-10 | 0.009559 |
| 24Mar2011  | 21661 | 1028.1  | -23.8693 | 2 K.SSEFLQF5 chr4@1170  | 1.07E-10 | 0.002635 |
| 29Nov2011  | 6659  | 1074.02 | -8.16533 | 2 K.WNERSKI chr5@1886   | 6.48E-11 | 0.004699 |
| 29Nov2011  | 10624 | 925.49  | -12.7457 | 3 R.MFLDFK+ chr2@6359   | 2.47E-10 | 0.009026 |
| 29Nov2011  | 20121 | 1053.9  | 13.29441 | 3 K.YFQLRSK5 chr5@3240  | 2.19E-10 | 0.006482 |
| 26July2011 | 6114  | 433.57  | 0.940677 | 3 K.HPCIPLSF chr2@3839  | 1.21E-10 | 0.00435  |
| 24Mar2011  | 12582 | 928.96  | 17.14485 | 2 K.VNTNFCM chr5@1104   | 5.63E-10 | 0.007531 |
| 24Mar2011  | 9342  | 992.52  | 18.87841 | 2 R.LRRRHNL chr5@5571   | 5.13E-10 | 0.009713 |
| 29Nov2011  | 21240 | 1165.1  | 17.23241 | 2 K.FYIFQNK5 chrX@8844  | 1.23E-10 | 0.003366 |
| 24Mar2011  | 8294  | 835.94  | 23.44509 | 2 K.ELHPKNG chr4@5861   | 3.07E-10 | 0.006333 |
| 24Mar2011  | 7305  | 781     | -11.5184 | 5 _QTVLLTTI chr2@1351   | 5.25E-11 | 4.53E-04 |
| 29Nov2011  | 12571 | 700.39  | -12.1812 | 2 R.QLPVFK+ chr2@1312   | 3.30E-11 | 0.001944 |
| 29Nov2011  | 13466 | 700.39  | -12.1812 | 2 R.QLPVFK+ chr2@1312   | 1.69E-10 | 0.004691 |
| 29Nov2011  | 20196 | 1124.65 | 19.80948 | 2 K.FFENFKK- chr2@1455  | 2.76E-10 | 0.007749 |
| 29Nov2011  | 17628 | 1263.6  | -8.48632 | 2 I.QFSCLLAI chr5@1739  | 3.10E-10 | 0.00898  |
| 29Nov2011  | 17595 | 1263.61 | -0.55529 | 2 I.QFSCLLAI chr5@1739  | 1.75E-10 | 0.005109 |
| 24Mar2011  | 2723  | 414.58  | 2.06613  | 3 K.KNGNGIC chr4@8682   | 5.74E-10 | 0.008937 |
| 24Mar2011  | 743   | 419.21  | 25.07655 | 3 K.GRM+15. chr4@4471   | 4.28E-10 | 0.008107 |
| 24Mar2011  | 8559  | 906.44  | -0.16743 | 2 R.RTFDMD chr1@1166    | 1.65E-10 | 0.003505 |
| 29Nov2011  | 10706 | 829.43  | 5.627131 | 3 R.AKNANN Splice@chr   | 8.78E-11 | 0.003871 |
| 29Nov2011  | 16144 | 1164.59 | -12.1474 | 2 _MDGWV Splice@chr     | 2.43E-10 | 0.005801 |
| 29Nov2011  | 16002 | 672.13  | -18.7178 | 4 R.YNFATKY chr5@6926   | 1.50E-10 | 0.004086 |
| 24Mar2011  | 5522  | 894.49  | 14.97968 | 1 R.ILSNLGYM chr5@7047  | 3.54E-10 | 0.007546 |
| 24Mar2011  | 7399  | 894.48  | 3.76382  | 1 R.ILSNLGYM chr5@7047  | 4.42E-10 | 0.005734 |
| 24Mar2011  | 20210 | 912.96  | 6.845908 | 4 R.CSFFPNP chr5@5429   | 4.88E-10 | 0.009808 |
| 24Mar2011  | 2202  | 417.22  | -5.64578 | 2 K.SGEVEGK Splice@chr  | 1.82E-10 | 0.006789 |
| 29Nov2011  | 6724  | 649.35  | 11.86183 | 2 K.FPK+14.0 chr4@4357  | 1.85E-10 | 0.005335 |
| 24Mar2011  | 3908  | 968.46  | 11.0543  | 1 K.NWQNFN chrX@1141    | 1.33E-10 | 0.001472 |
| 29Nov2011  | 12997 | 1155.11 | -25.0506 | 2 R.SFREK+1+ chr1@5550  | 2.48E-10 | 0.007708 |
| 26July2011 | 1635  | 620     | 14.26493 | 3 _HVPIKNG Splice@chr   | 2.95E-10 | 0.009895 |
| 29Nov2011  | 15147 | 836.2   | -3.28855 | 4 _RGFEK+1 chr1@6335    | 2.25E-10 | 0.006187 |

|            |       |         |          |                         |          |          |
|------------|-------|---------|----------|-------------------------|----------|----------|
| 29Nov2011  | 342   | 464.22  | -21.1684 | 2 K.GFGVGYC Splice@chr  | 6.48E-13 | 2.38E-04 |
| 29Nov2011  | 1207  | 636.3   | 16.97247 | 2 K.ISDFCANi chr3@1835  | 1.57E-10 | 0.005229 |
| 24Mar2011  | 9502  | 804.93  | 27.5886  | 4 K.NIK+14.0 Splice@chr | 4.41E-10 | 0.007963 |
| 29Nov2011  | 10674 | 466.27  | 13.6604  | 2 R.SKFGGIH chrX@2515   | 2.55E-10 | 0.00655  |
| 29Nov2011  | 11214 | 635.86  | 27.56856 | 2 K.KM+15.9 chr3@2591   | 2.83E-10 | 0.008359 |
| 26July2011 | 6721  | 752.06  | 8.885184 | 3 K.NRYAANI chrX@5665   | 2.46E-10 | 0.009223 |
| 24Mar2011  | 7665  | 720.41  | -22.737  | 2 R.K+14.016 chr3@4804  | 1.09E-10 | 0.002374 |
| 24Mar2011  | 7581  | 720.41  | -22.737  | 2 R.K+14.016 chr3@4804  | 1.66E-10 | 0.002783 |
| 24Mar2011  | 7547  | 720.41  | -22.737  | 2 R.K+14.016 chr3@4804  | 2.60E-10 | 0.004702 |
| 24Mar2011  | 7937  | 720.41  | -22.737  | 2 R.K+14.016 chr3@4804  | 1.46E-10 | 0.002258 |
| 24Mar2011  | 7076  | 659.36  | -15.6126 | 3 K.FGKNFQk chr5@1891   | 3.02E-10 | 0.006515 |
| 26July2011 | 10524 | 581.66  | 27.03204 | 3 K.GKFHGFc chr2@1861   | 7.17E-11 | 0.002682 |
| 29Nov2011  | 19080 | 860.95  | -7.09754 | 4 R.DTQRTVI chr4@1718   | 3.23E-10 | 0.008012 |
| 24Mar2011  | 5641  | 783.93  | 25.10315 | 2 L.QVYSSSRi chr4@8021  | 2.52E-11 | 0.002618 |
| 24Mar2011  | 4400  | 550.3   | 8.148574 | 3 K.KMCEFFF chrX@1415   | 3.34E-10 | 0.007587 |
| 24Mar2011  | 3786  | 711.85  | -17.7414 | 2 T.FSYSGM+ chr4@9472   | 4.66E-10 | 0.009765 |
| 29Nov2011  | 16444 | 746.13  | 13.32468 | 3 R.LKKNFRK chr4@5132   | 2.10E-10 | 0.009648 |
| 26July2011 | 3200  | 647.31  | -5.19404 | 2 R.YVTFECLi chr5@8975  | 1.30E-10 | 0.007738 |
| 29Nov2011  | 10427 | 984.82  | -16.2954 | 3 K.SLKYEAD' chr4@1028  | 1.78E-11 | 0.00201  |
| 29Nov2011  | 442   | 552.34  | 10.07424 | 2 K.AEKMQK chr2@5244    | 3.43E-10 | 0.009211 |
| 24Mar2011  | 13534 | 1012.05 | -16.6385 | 2 _TFRWIPIk chr3@1220   | 1.19E-10 | 0.001185 |
| 29Nov2011  | 18340 | 1163.27 | -23.0942 | 3 _QYK+14.( Splice@chr  | 1.40E-10 | 0.004243 |
| 29Nov2011  | 10584 | 667.35  | -13.8369 | 3 T.LYATRNa chr5@1731   | 1.86E-10 | 0.006191 |
| 24Mar2011  | 7128  | 738.8   | 28.18988 | 2 K.SCYWDEI chr2@4384   | 2.37E-10 | 0.0068   |
| 29Nov2011  | 644   | 859.47  | 27.05218 | 1 R.SGSGPLQ chr1@1250   | 9.72E-11 | 0.002925 |
| 24Mar2011  | 408   | 788.42  | 28.37079 | 1 K.PMEIGNk chr4@2725   | 4.68E-10 | 0.008927 |
| 29Nov2011  | 3183  | 520.27  | -17.7048 | 2 K.ESLSSQFI Splice@chr | 2.99E-10 | 0.007825 |
| 29Nov2011  | 11927 | 676.35  | 3.494576 | 3 K.YSNKCPV Splice@chr  | 1.55E-10 | 0.005829 |
| 26July2011 | 1830  | 662.34  | -0.58372 | 3 _SDGSAEV chrX@1361    | 2.16E-10 | 0.005673 |
| 29Nov2011  | 2328  | 672.65  | -11.2077 | 3 R.NEMNIEI chr2@5830   | 1.77E-10 | 0.004962 |
| 24Mar2011  | 4114  | 401.74  | -7.99616 | 2 K.VISAGSLF chr1@4821  | 4.04E-10 | 0.0083   |
| 24Mar2011  | 7278  | 920.5   | 5.974164 | 2 T.RWLNW\ chr5@1769    | 7.94E-11 | 0.001992 |
| 29Nov2011  | 12886 | 492.25  | -6.27441 | 2 K.DYRGTIM Splice@chr  | 9.55E-11 | 0.002653 |
| 24Mar2011  | 10706 | 1063.08 | -22.7378 | 2 K.YEFHKVV chr3@8106   | 4.72E-10 | 0.007589 |
| 29Nov2011  | 4771  | 894.47  | -27.2562 | 2 K.TPK+14.0 chr4@2358  | 8.52E-11 | 0.00301  |
| 29Nov2011  | 15529 | 1240.59 | -26.4748 | 2 _LTFQRAS chr3@4226    | 3.33E-10 | 0.008921 |
| 26July2011 | 1900  | 771.39  | -22.0247 | 4 R.QLFGFSD chr4@7152   | 4.25E-11 | 0.002976 |
| 24Mar2011  | 12528 | 1140.04 | -27.4348 | 2 R.VNSVGYY chr4@6555   | 1.28E-11 | 0.003396 |
| 26July2011 | 435   | 586.35  | 23.9535  | 2 K.KWNASR chr2@1155    | 5.01E-12 | 0        |
| 26July2011 | 4359  | 502.26  | -4.99236 | 2 K.SQNTAQI Splice@chr  | 5.98E-11 | 0.001395 |
| 24Mar2011  | 13569 | 980.12  | -17.106  | 3 K.AVPFVPIs Splice@chr | 1.21E-10 | 0.001512 |
| 29Nov2011  | 19003 | 872.71  | -10.1374 | 4 R.EKCKGRN chr5@8609   | 3.54E-10 | 0.009211 |
| 24Mar2011  | 11867 | 798.42  | -12.949  | 1 R.TVHTSPR chr3@1369   | 1.22E-10 | 0.001318 |
| 29Nov2011  | 6323  | 876.45  | -23.1463 | 2 _TRETSSAI chr5@2835   | 1.42E-10 | 0.004273 |
| 24Mar2011  | 14707 | 959.84  | -4.07395 | 3 R.GCGRKLI chrX@1584   | 5.31E-11 | 0.003908 |
| 29Nov2011  | 18698 | 962.02  | 17.14835 | 2 R.FKYLQLW chr3@8415   | 1.60E-10 | 0.004417 |
| 24Mar2011  | 9261  | 675.38  | -23.6217 | 2 R.RK+14.01 chr1@5546  | 5.48E-10 | 0.007105 |

|            |       |         |          |                         |          |          |
|------------|-------|---------|----------|-------------------------|----------|----------|
| 24Mar2011  | 7257  | 675.38  | -23.6217 | 2 R.RK+14.01 chr1@5546  | 6.24E-10 | 0.005353 |
| 24Mar2011  | 14634 | 999.3   | -16.5569 | 4 R.LFK+14.0 chrX@1075  | 2.01E-10 | 0.002115 |
| 26July2011 | 10361 | 723.36  | -2.70462 | 1 R.GGGNVY chrX@1147    | 1.63E-10 | 0.003599 |
| 24Mar2011  | 13370 | 738.06  | -29.2433 | 3 R.K+14.016 Splice@chr | 5.59E-10 | 0.008726 |
| 26July2011 | 3514  | 823.75  | -6.50529 | 3 K.TTEWM+ chrX@1352    | 1.89E-10 | 0.007846 |
| 24Mar2011  | 15117 | 921     | -14.3299 | 2 K.IVFNPILS chrX@1251  | 1.81E-10 | 0.003715 |
| 24Mar2011  | 124   | 693.36  | 3.085478 | 2 R.LHHPLYSI Splice@chr | 1.73E-15 | 0        |
| 24Mar2011  | 3781  | 486.27  | -21.0044 | 2 _LGLVGEV chrX@1292    | 4.79E-10 | 0.00953  |
| 26July2011 | 2660  | 585.81  | 26.96648 | 4 _AFGGAFS chr2@4952    | 2.98E-12 | 0        |
| 26July2011 | 2077  | 705.02  | -16.3921 | 3 R.KLCSDVT. Splice@chr | 9.67E-11 | 0.002556 |
| 26July2011 | 7364  | 659.42  | -1.66861 | 2 R.RGK+14.( chr5@1685  | 1.68E-10 | 0.007718 |
| 29Nov2011  | 17472 | 1310.7  | -9.32045 | 1 R.TREFIFRV chr1@4480  | 1.75E-10 | 0.005462 |
| 29Nov2011  | 11547 | 1310.69 | -16.9632 | 1 R.TREFIFRV chr1@4480  | 1.98E-10 | 0.007258 |
| 29Nov2011  | 3125  | 536.8   | 25.17601 | 2 R.NWGGG( chr3@1175    | 1.16E-10 | 0.003453 |
| 29Nov2011  | 10213 | 837.46  | 21.82782 | 3 K.SISFFDRS chrX@1264  | 2.37E-10 | 0.007024 |
| 24Mar2011  | 2714  | 549.32  | -4.00731 | 2 R.AKRVAHI chr2@5335   | 3.61E-10 | 0.008186 |
| 29Nov2011  | 16737 | 962.02  | -9.05389 | 2 R.KKYEKM+ chr3@2847   | 1.87E-10 | 0.00617  |
| 26July2011 | 2213  | 567.63  | -15.7265 | 3 K.PTPWSK+ chr1@7458   | 2.09E-11 | 0.001433 |
| 24Mar2011  | 8285  | 839.44  | 2.911879 | 1 K.VHELGER chr3@1061   | 1.54E-10 | 0.001827 |
| 24Mar2011  | 450   | 417.72  | -18.1617 | 2 _FSEAPRK. chr5@2085   | 5.19E-10 | 0.009436 |
| 29Nov2011  | 20321 | 1324.67 | 2.63194  | 1 R.EDRCFK+ chr5@8121   | 4.01E-11 | 0.0018   |
| 29Nov2011  | 8309  | 673.35  | -25.8439 | 2 L.KIAVRETE chr2@3514  | 3.01E-10 | 0.00709  |
| 29Nov2011  | 15144 | 1033.52 | 5.03162  | 1 K.SFSSFSRS chr4@7287  | 5.92E-11 | 0.002026 |
| 24Mar2011  | 6806  | 673.85  | -16.4187 | 2 K.EIAWIVQ chr4@7871   | 4.06E-10 | 0.00559  |
| 24Mar2011  | 4734  | 673.85  | -16.4187 | 2 K.EIAWIVQ chr4@7871   | 2.35E-10 | 0.002962 |
| 24Mar2011  | 4623  | 673.85  | -16.4187 | 2 K.EIAWIVQ chr4@7871   | 4.64E-10 | 0.008323 |
| 24Mar2011  | 4585  | 673.85  | -16.4187 | 2 K.EIAWIVQ chr4@7871   | 8.99E-11 | 0.002433 |
| 29Nov2011  | 5384  | 871.03  | 10.03674 | 3 R.KCDQCEI chr4@5179   | 4.82E-16 | 0        |
| 29Nov2011  | 4419  | 871.03  | 10.03674 | 3 R.KCDQCEI chr4@5179   | 1.11E-17 | 0        |
| 29Nov2011  | 2585  | 410.22  | -23.9652 | 2 R.SSNGGKI chr3@1185   | 1.46E-10 | 0.004324 |
| 29Nov2011  | 2624  | 410.22  | -23.9652 | 2 R.SSNGGKI chr3@1185   | 2.83E-10 | 0.008359 |
| 24Mar2011  | 2723  | 544.29  | 20.5596  | 2 K.FFAVSIEN Splice@chr | 7.53E-11 | 0.001753 |
| 24Mar2011  | 17139 | 746.91  | -2.37299 | 2 K.SSQTKIGI chr4@4479  | 2.00E-10 | 0.004406 |
| 26July2011 | 7102  | 578.55  | -14.3513 | 4 R.SLCNRFL( chr5@7364  | 2.73E-11 | 0.001407 |
| 24Mar2011  | 4593  | 908.9   | -27.2263 | 2 R.FWKFPAL chr1@1399   | 6.38E-10 | 0.008726 |
| 24Mar2011  | 5993  | 1154.69 | -9.52275 | 1 R.ALVVNLN chr5@5505   | 3.38E-11 | 0.00102  |
| 24Mar2011  | 3903  | 525.78  | -16.6318 | 2 K.LSDYRLQ chr1@1279   | 3.98E-10 | 0.007345 |
| 24Mar2011  | 3192  | 525.78  | -16.6318 | 2 K.LSDYRLQ chr1@1279   | 3.57E-10 | 0.006396 |
| 24Mar2011  | 9806  | 847.73  | -23.9313 | 3 K.DKM+15. Splice@chr  | 3.63E-10 | 0.00962  |
| 29Nov2011  | 3603  | 1162.57 | -16.394  | 1 K.DSMIVNC chr2@5955   | 2.26E-10 | 0.008117 |
| 29Nov2011  | 1718  | 801.45  | -10.3701 | 1 R.NLIASGA chrX@5905   | 2.42E-10 | 0.007192 |
| 29Nov2011  | 5373  | 1152.59 | -29.3471 | 2 _RQERLVK Splice@chr   | 1.60E-10 | 0.009001 |
| 24Mar2011  | 2065  | 787.43  | 10.86568 | 1 R.YGHRAIA chr2@1475   | 8.60E-11 | 0.001142 |
| 24Mar2011  | 6519  | 674.91  | -1.76583 | 2 _LLNLHLLL Splice@chr  | 5.67E-10 | 0.009443 |
| 26July2011 | 6255  | 755.4   | -20.5849 | 3 R.FYIDLRGI chr5@1081  | 3.01E-10 | 0.007051 |
| 26July2011 | 953   | 588.97  | 25.67583 | 3 K.LYTQQMI Splice@chr  | 5.81E-11 | 0.005682 |
| 24Mar2011  | 3853  | 922.49  | 1.589663 | 1 _EGTDLFIK Splice@chr  | 2.33E-10 | 0.005183 |

|            |       |         |          |                          |          |          |
|------------|-------|---------|----------|--------------------------|----------|----------|
| 24Mar2011  | 16019 | 983.54  | 5.608363 | 4 K.FQFFPK+ chr3@3209    | 3.52E-10 | 0.009462 |
| 29Nov2011  | 19066 | 1163.27 | -0.33207 | 3 K.LSREK+14 chr5@1921   | 6.91E-11 | 0.002935 |
| 29Nov2011  | 18409 | 838.68  | -5.15592 | 4 R.FFLMLKl chr5@4106    | 3.53E-10 | 0.009211 |
| 29Nov2011  | 2861  | 723.46  | 11.48986 | 1 R.APVIAPR chrX@1135    | 3.62E-10 | 0.009212 |
| 29Nov2011  | 18862 | 1356.19 | -14.6644 | 2 _IENMFLG chr5@2663     | 2.79E-10 | 0.008101 |
| 24Mar2011  | 2159  | 476.22  | -14.1922 | 2 K.ETEMTN\ chr2@1044    | 3.40E-11 | 6.28E-04 |
| 29Nov2011  | 18168 | 1202.64 | -18.1651 | 2 K.KCFLHFL\ chr3@3058   | 3.48E-10 | 0.008817 |
| 26July2011 | 2382  | 515.95  | -21.0704 | 3 R.RFLKWK5 chr4@1309    | 1.48E-10 | 0.003599 |
| 24Mar2011  | 14265 | 713.37  | 11.30988 | 2 S.TQYLNQT Splice@chr   | 3.92E-10 | 0.008583 |
| 24Mar2011  | 11440 | 713.37  | 11.30988 | 2 S.TQYLNQT Splice@chr   | 4.62E-10 | 0.009381 |
| 26July2011 | 826   | 694.37  | 1.496475 | 2 R.CPCAIAA chrX@4209    | 1.18E-10 | 0.009694 |
| 24Mar2011  | 2888  | 434.24  | -23.8254 | 3 K.QLIPSCQl chr2@1053   | 5.33E-10 | 0.006724 |
| 26July2011 | 1544  | 546.85  | 18.18949 | 2 R.SIVIPAAK chr5@1634   | 3.77E-11 | 0        |
| 24Mar2011  | 4697  | 996.49  | 1.002488 | 3 R.K+14.016 Splice@chr  | 2.09E-10 | 0.005248 |
| 26July2011 | 545   | 561.56  | 18.07507 | 4 _KYIRGIM- chrX@1738    | 1.58E-10 | 0.009975 |
| 24Mar2011  | 23650 | 814.14  | 8.807327 | 3 _RLQILQTl chr1@1097    | 1.38E-10 | 0.004063 |
| 24Mar2011  | 18814 | 814.14  | 8.807327 | 3 _RLQILQTl chr1@1097    | 3.07E-10 | 0.0074   |
| 29Nov2011  | 463   | 408.2   | 18.7627  | 2 _FGGNYEK chr3@5442     | 1.92E-10 | 0.005313 |
| 29Nov2011  | 520   | 408.2   | 18.7627  | 2 _FGGNYEK chr3@5442     | 2.54E-10 | 0.007895 |
| 26July2011 | 3302  | 591.57  | 3.645591 | 4 R.DLLK+14. chr2@7245   | 1.09E-10 | 0.009091 |
| 26July2011 | 173   | 739.74  | -22.803  | 3 _RFFLQFS\ chr1@1048    | 2.54E-11 | 0        |
| 24Mar2011  | 9939  | 517.27  | -6.77819 | 3 K.IGKSEELN Splice@chr  | 7.97E-11 | 0.001888 |
| 24Mar2011  | 9886  | 517.27  | -6.77819 | 3 K.IGKSEELN Splice@chr  | 2.93E-11 | 4.23E-04 |
| 26July2011 | 549   | 455.25  | -21.2295 | 3 K.PSGK+14 chr4@1107    | 1.98E-10 | 0.008786 |
| 29Nov2011  | 2188  | 521.75  | -8.99894 | 4 K.LDFISM+ chr2@2092    | 2.07E-10 | 0.00628  |
| 29Nov2011  | 12021 | 736.39  | -23.2948 | 2 K.NYTMIFE chr1@1118    | 1.19E-10 | 0.004065 |
| 24Mar2011  | 5751  | 982.47  | -16.0442 | 2 K.LMQAWl chr2@1680     | 1.28E-10 | 0.007179 |
| 24Mar2011  | 10116 | 1002.6  | 9.762117 | 1 _RATRRWl chr2@1197     | 6.08E-10 | 0.008937 |
| 26July2011 | 7168  | 574.55  | -19.5805 | 4 R.EIRVKMF chr4@1499    | 4.61E-10 | 0.009427 |
| 29Nov2011  | 11838 | 925.17  | -23.3206 | 3 _WCGKNE Splice@chr     | 5.28E-11 | 0.004143 |
| 24Mar2011  | 1187  | 503.77  | 0        | 2 R.FLAENER chr2@1146    | 4.15E-10 | 0.008349 |
| 29Nov2011  | 8931  | 654.35  | -14.5733 | 3 R.CLSLK+14 chr4@7951   | 2.34E-10 | 0.009982 |
| 24Mar2011  | 3351  | 450.59  | 9.503271 | 3 K.RHRHVDl chr3@2483    | 2.79E-10 | 0.004382 |
| 26July2011 | 3196  | 450.59  | 9.503271 | 3 K.RHRHVDl chr3@2483    | 1.50E-10 | 0.005478 |
| 24Mar2011  | 6264  | 559.32  | 28.3149  | 2 K.IDNIDFRl chr3@1878   | 4.38E-10 | 0.007295 |
| 29Nov2011  | 143   | 807.39  | -17.4274 | 1 K.SESAGVT chr1@6131    | 1.85E-11 | 0.001675 |
| 24Mar2011  | 21772 | 870.52  | 18.75037 | 3 R.ILAAGGE Splice@chr   | 3.86E-11 | 9.77E-04 |
| 24Mar2011  | 8921  | 858.96  | -6.93896 | 2 K.QM+15.9 chr1@9195    | 5.21E-11 | 6.78E-04 |
| 24Mar2011  | 1289  | 845.46  | -13.5293 | 1 K.KPPEAFR chrX@1352    | 6.06E-10 | 0.007628 |
| 26July2011 | 139   | 447.57  | 9.203059 | 3 K.MSFDNG Splice@chr    | 2.17E-10 | 0.006228 |
| 26July2011 | 6023  | 541.96  | -17.6762 | 3 K.IDIAFFKIS Splice@chr | 9.07E-11 | 0.002962 |
| 26July2011 | 5637  | 533.27  | 15.18594 | 3 K.QMIM+1 chr5@9484     | 2.24E-10 | 0.006171 |
| 24Mar2011  | 3515  | 505.27  | -14.7665 | 2 R.FNINFIN\ Splice@chr  | 2.27E-10 | 0.005522 |
| 29Nov2011  | 21002 | 1264.57 | -5.50663 | 1 L.ESETKQD chrX@2191    | 2.56E-10 | 0.00674  |
| 29Nov2011  | 17402 | 1264.57 | -5.50663 | 1 L.ESETKQD chrX@2191    | 5.36E-11 | 0.001722 |
| 29Nov2011  | 5208  | 525.28  | 9.615893 | 2 R.SSLESQN chrX@1724    | 2.47E-10 | 0.007512 |
| 29Nov2011  | 4561  | 525.28  | 9.615893 | 2 R.SSLESQN chrX@1724    | 2.11E-10 | 0.005001 |

|            |       |         |          |                         |          |          |
|------------|-------|---------|----------|-------------------------|----------|----------|
| 24Mar2011  | 9298  | 781.97  | -0.19414 | 2 R.RIK+14.0 chr5@6382  | 4.29E-10 | 0.007157 |
| 29Nov2011  | 4184  | 537.03  | -22.5451 | 4 _LEEMAA5 chr5@8785    | 8.54E-11 | 0.002353 |
| 24Mar2011  | 15645 | 960.55  | -19.1636 | 1 K.RGKTWR chrX@1435    | 4.43E-10 | 0.006527 |
| 29Nov2011  | 12437 | 786.41  | -26.6286 | 3 K.SGFHFTF chr1@5202   | 2.99E-10 | 0.009029 |
| 24Mar2011  | 1903  | 625.29  | -25.0281 | 2 _KMM+15 chr5@7925     | 1.44E-10 | 0.004223 |
| 26July2011 | 6588  | 901.16  | -19.0592 | 3 Q.DRSK+14 chr5@1402   | 1.45E-10 | 0.006124 |
| 29Nov2011  | 2357  | 854.93  | -2.21576 | 2 C.AGFFDS Splice@chr   | 1.19E-10 | 0.007012 |
| 29Nov2011  | 2132  | 1216.59 | -13.9584 | 2 _YGRWCW chr2@5845     | 1.20E-10 | 0.007277 |
| 24Mar2011  | 7887  | 748.4   | 0.898307 | 1 K.FSVPNGK chrX@5225   | 4.63E-10 | 0.00942  |
| 24Mar2011  | 4194  | 777.91  | 8.406228 | 2 _QILEVFLN Splice@chr  | 1.77E-10 | 0.002086 |
| 24Mar2011  | 10899 | 1143.6  | -22.4173 | 2 R.TKLKSHG chrX@9322   | 7.50E-11 | 0.00105  |
| 26July2011 | 4528  | 582.31  | -26.9278 | 3 R.IAYRFKLC chrX@1378  | 1.09E-10 | 0.001984 |
| 24Mar2011  | 1388  | 516.31  | 28.90151 | 2 R.RLKFSML chr4@1145   | 3.98E-10 | 0.009581 |
| 26July2011 | 3909  | 596.98  | -12.4259 | 3 R.LTCGGISL Splice@chr | 2.68E-10 | 0.009615 |
| 24Mar2011  | 6779  | 865.45  | -16.3804 | 2 K.SCIRHLSL Splice@chr | 5.70E-10 | 0.00898  |
| 24Mar2011  | 7774  | 665.84  | -5.55677 | 2 R.DNQPTV chr2@4912    | 1.26E-11 | 2.36E-04 |
| 24Mar2011  | 960   | 985.48  | 27.96181 | 1 R.EPTNHM Splice@chr   | 3.59E-10 | 0.007276 |
| 26July2011 | 8819  | 673.39  | -21.9669 | 3 R.K+14.016 chr4@1238  | 8.46E-11 | 0.001168 |
| 29Nov2011  | 4381  | 650.85  | -22.5098 | 2 R.DPMGRG chr5@4137    | 3.11E-10 | 0.009689 |
| 24Mar2011  | 8067  | 705.83  | 3.077899 | 2 R.SASFM+1 Splice@chr  | 2.12E-11 | 5.77E-04 |
| 24Mar2011  | 1355  | 444.59  | 14.03499 | 3 K.KM+15.9 chr4@1484   | 4.08E-10 | 0.006275 |
| 26July2011 | 414   | 461.49  | 0.729005 | 4 R.AFENSGC chrX@8041   | 5.78E-11 | 0.001946 |
| 24Mar2011  | 13879 | 851.67  | -18.3546 | 4 K.SKNTGEN chr4@8365   | 4.96E-10 | 0.006599 |
| 29Nov2011  | 6650  | 672.36  | 6.454919 | 4 R.NGSNLEF chr4@1955   | 6.88E-11 | 0.004349 |
| 26July2011 | 5509  | 622.74  | 24.00073 | 3 K.PRLSGLS chr4@1706   | 1.57E-11 | 7.16E-04 |
| 29Nov2011  | 1733  | 467.24  | 10.48662 | 2 _FEPGVGC chrX@6712    | 1.85E-10 | 0.005028 |
| 29Nov2011  | 1486  | 467.24  | 10.48662 | 2 _FEPGVGC chrX@6712    | 7.92E-11 | 0.00359  |
| 29Nov2011  | 1195  | 467.24  | 10.48662 | 2 _FEPGVGC chrX@6712    | 2.88E-11 | 0.001041 |
| 29Nov2011  | 1204  | 467.24  | 10.48662 | 2 _FEPGVGC chrX@6712    | 1.93E-10 | 0.007913 |
| 24Mar2011  | 12714 | 677.33  | 1.082949 | 2 K.M+15.99 chr1@6198   | 5.36E-10 | 0.00741  |
| 26July2011 | 985   | 692.87  | -6.04578 | 2 _VDTLK+1 chr1@1211    | 4.06E-10 | 0.009772 |
| 29Nov2011  | 15110 | 1156.59 | 22.28956 | 2 K.STPDMA chr3@1225    | 1.85E-10 | 0.005093 |
| 26July2011 | 2160  | 625.36  | 17.40115 | 2 K.IVGTVKSI chr1@8515  | 9.75E-11 | 0.005172 |
| 26July2011 | 64    | 742.86  | -13.6239 | 2 K.TVADTM Splice@chr   | 9.99E-11 | 0        |
| 24Mar2011  | 7290  | 829.94  | 6.405943 | 2 K.NLFFLEIF chr1@1390  | 5.66E-10 | 0.009893 |
| 26July2011 | 7364  | 836.2   | 15.4435  | 4 K.VNM+15 chrX@1626    | 2.77E-10 | 0.008739 |
| 26July2011 | 224   | 426.9   | 11.08286 | 3 K.QKCTRST chr5@1167   | 5.65E-11 | 0.003114 |
| 29Nov2011  | 14929 | 1040.51 | -22.3898 | 3 K.NQYFSTN chr2@1276   | 1.31E-10 | 0.004224 |
| 26July2011 | 1472  | 696.78  | 10.76079 | 3 K.IQKKSLKF chr4@1352  | 1.45E-10 | 0.009975 |
| 24Mar2011  | 788   | 559.31  | -23.103  | 3 R.K+14.016 Splice@chr | 3.18E-10 | 0.003382 |
| 24Mar2011  | 1208  | 559.31  | -23.103  | 3 R.K+14.016 Splice@chr | 3.32E-10 | 0.004859 |
| 26July2011 | 589   | 432.89  | -1.03637 | 3 R.LACRFVM Splice@chr  | 2.31E-10 | 0.009749 |
| 26July2011 | 1022  | 449.24  | -19.8481 | 3 R.VGYKSSK chr4@1555   | 3.89E-11 | 0.001252 |
| 29Nov2011  | 17127 | 885.14  | 20.61857 | 3 R.WICNSLN chr5@2898   | 3.10E-11 | 7.89E-04 |
| 29Nov2011  | 16370 | 1257.19 | -3.47455 | 2 K.VGHDYTE chr4@2111   | 1.98E-10 | 0.009038 |
| 29Nov2011  | 14590 | 822.69  | 18.19911 | 4 _EDPTPQP Splice@chr   | 2.46E-10 | 0.006664 |
| 29Nov2011  | 690   | 435.2   | 14.7798  | 2 K.SSSSNGS chr4@1361   | 1.90E-10 | 0.004736 |

|            |       |         |          |                          |          |          |
|------------|-------|---------|----------|--------------------------|----------|----------|
| 24Mar2011  | 9331  | 552.27  | -23.804  | 2 R.IDALGDD chr3@1019    | 1.15E-11 | 7.25E-04 |
| 24Mar2011  | 7837  | 618.34  | 27.38753 | 2 R.FSELNAA chr4@4318    | 5.01E-10 | 0.009905 |
| 24Mar2011  | 6628  | 618.34  | 27.38753 | 2 R.FSELNAA chr4@4318    | 3.57E-10 | 0.00962  |
| 24Mar2011  | 11694 | 677.33  | 1.082949 | 2 R.KMDNCS chr5@1863     | 5.10E-10 | 0.006535 |
| 24Mar2011  | 8884  | 677.33  | 1.082949 | 2 R.KMDNCS chr5@1863     | 6.89E-11 | 0.002205 |
| 24Mar2011  | 10056 | 677.33  | 1.082949 | 2 R.KMDNCS chr5@1863     | 1.18E-10 | 0.001644 |
| 24Mar2011  | 8804  | 677.33  | 1.082949 | 2 R.KMDNCS chr5@1863     | 4.02E-10 | 0.00917  |
| 24Mar2011  | 11449 | 677.33  | 1.082949 | 2 R.KMDNCS chr5@1863     | 4.77E-10 | 0.006406 |
| 24Mar2011  | 9536  | 677.33  | 1.082949 | 2 R.KMDNCS chr5@1863     | 3.38E-10 | 0.003496 |
| 24Mar2011  | 10090 | 677.34  | 15.88326 | 2 R.KMDNCS chr5@1863     | 1.34E-10 | 0.005611 |
| 24Mar2011  | 5459  | 771.42  | -27.0939 | 2 _HFEVRK+ chr5@5084     | 9.37E-11 | 0.001767 |
| 26July2011 | 7088  | 483.24  | -12.7832 | 2 K.NVIRYWI chr5@1443    | 1.58E-10 | 0.006676 |
| 24Mar2011  | 20757 | 798.65  | -9.24187 | 4 I.ITIINTLIFC chr4@7431 | 4.17E-10 | 0.008349 |
| 24Mar2011  | 2574  | 551.32  | -5.32365 | 2 K.ESIGERLR chrX@1396   | 3.46E-10 | 0.005556 |
| 26July2011 | 240   | 530.34  | 17.11618 | 3 K.EYK+14.0 chr5@8024   | 6.39E-11 | 0.003759 |
| 29Nov2011  | 10820 | 694.67  | -10.7681 | 3 R.FLCGCKG chr5@4880    | 1.62E-10 | 0.00427  |
| 24Mar2011  | 1977  | 917.53  | -12.9857 | 1 K.VISSLDRK chr5@9012   | 3.86E-10 | 0.005013 |
| 24Mar2011  | 2428  | 917.53  | -12.9857 | 1 K.VISSLDRK chr5@9012   | 6.44E-10 | 0.00811  |
| 26July2011 | 3065  | 503.27  | -13.9794 | 5 K.LLLPNSIQ chrX@1165   | 3.25E-11 | 0.00128  |
| 29Nov2011  | 12826 | 1109.57 | -27.9687 | 1 _SRWHLPI chr5@2962     | 1.34E-11 | 0.00103  |
| 26July2011 | 22    | 509.27  | 17.7461  | 3 K.CEFCNGK chr5@2531    | 5.51E-11 | 0        |
| 29Nov2011  | 2147  | 581.31  | 18.72208 | 2 R.KNDVWS chr4@5103     | 5.86E-11 | 0.003224 |
| 24Mar2011  | 6969  | 858.98  | -20.7474 | 2 R.CSRITVSS chr5@4113   | 5.81E-10 | 0.005205 |
| 29Nov2011  | 8921  | 682.38  | 25.48389 | 3 _ARLPRSP Splice@chr    | 2.01E-10 | 0.004868 |
| 24Mar2011  | 1975  | 473.31  | 20.70133 | 2 R.ATGAKQI chrX@1435    | 5.86E-10 | 0.008647 |
| 26July2011 | 9854  | 858.12  | 16.45709 | 3 R.STPCNAN chrX@1236    | 3.31E-10 | 0.007521 |
| 26July2011 | 1599  | 498.28  | 14.04435 | 3 _YFVSKNQ chr2@1075     | 3.38E-11 | 9.82E-04 |
| 29Nov2011  | 2484  | 486.29  | -28.8011 | 2 K.RGIEQKIK chrX@1265   | 3.22E-10 | 0.008012 |
| 29Nov2011  | 2518  | 486.29  | -28.8011 | 2 K.RGIEQKIK chrX@1265   | 3.18E-10 | 0.008642 |
| 29Nov2011  | 18414 | 1133.59 | -21.3401 | 2 K.MEMMMV Splice@chr    | 3.23E-10 | 0.008525 |
| 24Mar2011  | 7506  | 547.32  | -14.6354 | 2 _NIPDLLPF chrX@2547    | 1.54E-10 | 0.008008 |
| 24Mar2011  | 6591  | 547.32  | -14.6354 | 2 _NIPDLLPF chrX@2547    | 6.84E-11 | 0.006753 |
| 26July2011 | 6982  | 767.75  | 16.77003 | 3 K.AK+14.01 chr1@1344   | 1.83E-10 | 0.006816 |
| 26July2011 | 7818  | 767.75  | 16.77003 | 3 K.AK+14.01 chr1@1344   | 3.64E-12 | 0.00173  |
| 24Mar2011  | 1468  | 767.39  | 17.14828 | 1 R.YVGDGQ chr2@1066     | 1.22E-10 | 0.002902 |
| 29Nov2011  | 12324 | 694.37  | 25.44069 | 1 R.SPASPVH chr5@4600    | 2.27E-10 | 0.00959  |
| 24Mar2011  | 8627  | 781.37  | -26.2556 | 2 K.FNFSLK+ chr2@3065    | 3.15E-10 | 0.008094 |
| 24Mar2011  | 6122  | 662.87  | 0.737739 | 2 K.VKRPSFKI chr3@1006   | 1.13E-10 | 0.007104 |
| 29Nov2011  | 11058 | 1359.13 | -25.5257 | 2 S.QVREMH Splice@chr    | 3.33E-10 | 0.00743  |
| 24Mar2011  | 10292 | 880.97  | -2.01147 | 2 F.LMEILEIS chr1@4926   | 7.82E-11 | 0.001888 |
| 24Mar2011  | 9204  | 880.96  | -13.3173 | 2 F.LMEILEIS Splice@chr  | 4.31E-11 | 7.87E-04 |
| 24Mar2011  | 3838  | 880.97  | -2.01147 | 2 F.LMEILEIS Splice@chr  | 4.07E-10 | 0.00768  |
| 24Mar2011  | 7878  | 880.96  | -13.3173 | 2 F.LMEILEIS chr1@4926   | 2.63E-10 | 0.006913 |
| 24Mar2011  | 7937  | 880.96  | -13.3173 | 2 F.LMEILEIS Splice@chr  | 2.63E-10 | 0.006913 |
| 24Mar2011  | 4365  | 880.97  | -2.01147 | 2 F.LMEILEIS Splice@chr  | 6.77E-11 | 0.001267 |
| 29Nov2011  | 1592  | 904.4   | 26.55265 | 1 R.DNQGGG chr5@2489     | 3.30E-11 | 0.001944 |
| 29Nov2011  | 868   | 904.4   | 26.55265 | 1 R.DNQGGG chr5@2489     | 2.56E-10 | 0.008454 |

|            |       |         |          |                         |          |          |
|------------|-------|---------|----------|-------------------------|----------|----------|
| 24Mar2011  | 3465  | 485.94  | -29.2833 | 3 K.IVLKCSKN chr1@1011  | 1.61E-10 | 0.001821 |
| 29Nov2011  | 3294  | 717.38  | -29.5402 | 2 R.RYPVNAC chr4@6445   | 1.22E-10 | 0.005587 |
| 29Nov2011  | 3140  | 717.38  | -29.5402 | 2 R.RYPVNAC chr4@6445   | 4.22E-11 | 0.002119 |
| 29Nov2011  | 3251  | 717.38  | -29.5402 | 2 R.RYPVNAC chr4@6445   | 7.97E-11 | 0.003689 |
| 29Nov2011  | 3189  | 717.38  | -29.5402 | 2 R.RYPVNAC chr4@6445   | 4.87E-11 | 0.002301 |
| 29Nov2011  | 2631  | 717.39  | -15.558  | 2 R.RYPVNAC chr4@6445   | 1.90E-10 | 0.005313 |
| 29Nov2011  | 2998  | 717.38  | -29.5402 | 2 R.RYPVNAC chr4@6445   | 1.23E-10 | 0.003777 |
| 29Nov2011  | 3046  | 717.38  | -29.5402 | 2 R.RYPVNAC chr4@6445   | 4.89E-11 | 0.0016   |
| 29Nov2011  | 2802  | 717.39  | -15.558  | 2 R.RYPVNAC chr4@6445   | 2.15E-10 | 0.006699 |
| 29Nov2011  | 3156  | 717.38  | -29.5402 | 2 R.RYPVNAC chr4@6445   | 1.01E-10 | 0.003521 |
| 29Nov2011  | 3206  | 717.38  | -29.5402 | 2 R.RYPVNAC chr4@6445   | 1.92E-10 | 0.005357 |
| 29Nov2011  | 1114  | 717.38  | -29.5402 | 2 R.RYPVNAC chr4@6445   | 7.14E-11 | 0.004699 |
| 29Nov2011  | 1141  | 717.38  | -29.5402 | 2 R.RYPVNAC chr4@6445   | 4.67E-11 | 0.003845 |
| 29Nov2011  | 3011  | 717.38  | -29.5402 | 2 R.RYPVNAC chr4@6445   | 3.81E-11 | 7.89E-04 |
| 29Nov2011  | 3749  | 717.38  | -29.5402 | 2 R.RYPVNAC chr4@6445   | 5.17E-11 | 0.002182 |
| 29Nov2011  | 3687  | 717.38  | -29.5402 | 2 R.RYPVNAC chr4@6445   | 1.91E-10 | 0.005772 |
| 29Nov2011  | 3503  | 717.38  | -29.5402 | 2 R.RYPVNAC chr4@6445   | 5.54E-11 | 0.002435 |
| 26July2011 | 6     | 581.81  | -24.5899 | 2 _..M+15.99 chr2@1342  | 1.07E-10 | 0.007823 |
| 24Mar2011  | 4054  | 485.28  | -21.8035 | 2 R.ITIVDGVF Splice@chr | 4.09E-10 | 0.006078 |
| 29Nov2011  | 732   | 541.92  | 23.01937 | 3 K.LEM+15.! chrX@5528  | 1.96E-11 | 0.00201  |
| 24Mar2011  | 746   | 402.21  | -23.4276 | 2 _..MRGGGC chr2@1490   | 8.12E-11 | 0.001992 |
| 29Nov2011  | 1283  | 402.22  | 1.521271 | 2 _..MRGGGC chr2@1490   | 2.60E-10 | 0.007645 |
| 29Nov2011  | 1324  | 402.22  | 1.521271 | 2 _..MRGGGC chr2@1490   | 2.52E-10 | 0.007417 |
| 26July2011 | 2711  | 424.23  | -5.09558 | 3 R.VSPRFPO chr3@5375   | 1.65E-10 | 0.003444 |
| 29Nov2011  | 11178 | 792.93  | 22.27435 | 2 _..K+14.016 chr1@7445 | 3.24E-10 | 0.008795 |
| 24Mar2011  | 11413 | 461.67  | 12.71962 | 5 K.TIRKM+1 Splice@chr  | 2.71E-10 | 0.006474 |
| 26July2011 | 101   | 439.57  | -23.7214 | 3 R.EKAAGK/ chr1@1975   | 1.40E-10 | 0.003599 |
| 29Nov2011  | 16677 | 925.18  | -13.9832 | 3 R.ICMDVPL chr1@1504   | 3.40E-10 | 0.009814 |
| 26July2011 | 3522  | 648.34  | -25.6891 | 3 K.NQHLQSI chrX@4125   | 1.22E-10 | 0.004551 |
| 24Mar2011  | 15642 | 968.49  | 15.18154 | 2 D.QPLMFT( chr4@5815   | 3.59E-10 | 0.007633 |
| 24Mar2011  | 10121 | 967.99  | 16.91624 | 2 D.QPLMFT( chr4@5815   | 1.90E-10 | 0.002018 |
| 24Mar2011  | 16549 | 968.49  | 15.18154 | 2 D.QPLMFT( chr4@5815   | 3.39E-10 | 0.007281 |
| 24Mar2011  | 13340 | 968.49  | 15.18154 | 2 D.QPLMFT( chr4@5815   | 2.95E-10 | 0.0074   |
| 24Mar2011  | 12864 | 968.49  | 15.18154 | 2 D.QPLMFT( chr4@5815   | 3.04E-10 | 0.00824  |
| 24Mar2011  | 9510  | 1000.02 | 17.33065 | 2 I.ILRKSQDN chr4@1571  | 8.48E-11 | 0.002374 |
| 29Nov2011  | 18556 | 1329.71 | -19.0171 | 1 K.K+14.016 chr4@6445  | 3.14E-10 | 0.008214 |
| 24Mar2011  | 8765  | 625.32  | -14.2733 | 2 K.DKGK+1 Splice@chr   | 5.32E-10 | 0.006995 |
| 24Mar2011  | 15226 | 860.41  | 10.3691  | 1 K.MPMEPC chrX@8000    | 2.27E-10 | 0.005522 |
| 24Mar2011  | 1891  | 754.91  | 5.019483 | 2 R.NKAIQNA chr4@1625   | 1.26E-10 | 0.001368 |
| 24Mar2011  | 894   | 669.87  | 8.304021 | 2 R.LVEKYFH chr4@4160   | 3.90E-10 | 0.007216 |
| 26July2011 | 8012  | 825.92  | 6.437161 | 2 _..EMSWSV Splice@chr  | 4.62E-10 | 0.009427 |
| 24Mar2011  | 24279 | 1057.04 | 7.894075 | 2 K.KK+14.01 chr1@3887  | 2.49E-10 | 0.005844 |
| 24Mar2011  | 2978  | 666.88  | 6.376963 | 2 K.LLQCK+1. chrX@1715  | 2.95E-10 | 0.005008 |
| 29Nov2011  | 6932  | 595.33  | -26.9541 | 3 K.ENIKKKK- chr5@1024  | 3.26E-10 | 0.00743  |
| 26July2011 | 1914  | 571.87  | 23.84317 | 2 K.KKTKIWN chr1@4125   | 6.66E-11 | 0.005714 |
| 24Mar2011  | 10234 | 1016.61 | 24.90771 | 1 R.RRWWRf chrX@2605    | 2.82E-10 | 0.0052   |
| 26July2011 | 4137  | 613.31  | 22.44225 | 3 K.IELFVDEY chr5@4430  | 8.93E-11 | 0.003425 |

|            |       |         |          |                        |          |          |
|------------|-------|---------|----------|------------------------|----------|----------|
| 26July2011 | 923   | 565.82  | -25.286  | 2 K.IVEEMILF chr2@7574 | 4.50E-11 | 0.001813 |
| 24Mar2011  | 15786 | 735.87  | -6.68912 | 2 K.EETTFISP chrX@1502 | 3.91E-10 | 0.005976 |
| 24Mar2011  | 6624  | 516.61  | -9.90911 | 3 K.INVDCSLI chr5@1832 | 2.41E-11 | 0.001248 |
| 29Nov2011  | 3590  | 543.33  | -23.4846 | 2 R.RLVKWL chr1@5180   | 1.59E-10 | 0.004691 |
| 26July2011 | 1277  | 545.8   | 25.24887 | 4 K.LRETECL chrX@1010  | 2.19E-11 | 0.002602 |
| 24Mar2011  | 4039  | 639.86  | -24.5529 | 2 _K.FQLSHLI chrX@1593 | 3.49E-10 | 0.004136 |
| 26July2011 | 2578  | 934.47  | -21.7948 | 3 E.GEPNSNL Splice@chr | 3.90E-11 | 0.003759 |
| 26July2011 | 5629  | 934.47  | -21.7948 | 3 E.GEPNSNL Splice@chr | 2.62E-10 | 0.009615 |
| 24Mar2011  | 12822 | 909.21  | -12.9565 | 4 R.RTSDSM chr4@6771   | 4.69E-10 | 0.006474 |
| 24Mar2011  | 21369 | 909.21  | -12.9565 | 4 R.RTSDSM chr4@6771   | 3.37E-10 | 0.007281 |
| 29Nov2011  | 1396  | 417.25  | 20.85014 | 2 K.LAGAMTI Splice@chr | 1.25E-10 | 0.0042   |
| 24Mar2011  | 10424 | 905.47  | 20.44755 | 2 K.TCDVSTLI chr5@1676 | 1.93E-10 | 0.002015 |
| 29Nov2011  | 12101 | 807.94  | 1.779945 | 2 K.K+14.016 chr1@6245 | 2.21E-10 | 0.007376 |
| 24Mar2011  | 5662  | 779.07  | -16.087  | 3 K.LSK+14.0 chr5@1340 | 1.33E-10 | 0.00196  |
| 24Mar2011  | 8489  | 1164.57 | -8.44707 | 3 S.CFECK+14 chr4@8479 | 4.23E-10 | 0.007912 |
| 29Nov2011  | 4560  | 1214.1  | -25.3419 | 2 S.EAGGRK+ chr1@8767  | 2.73E-10 | 0.009687 |
| 24Mar2011  | 14343 | 954.51  | -0.25406 | 1 K.RIGHEWF chr5@7069  | 4.46E-10 | 0.006326 |
| 29Nov2011  | 3878  | 466.26  | -9.64217 | 2 _LLDTGSG Splice@chr  | 3.58E-10 | 0.009104 |
| 24Mar2011  | 17397 | 963.18  | -7.00061 | 3 _HSKQENK chrX@1047   | 1.96E-10 | 0.00513  |
| 24Mar2011  | 1702  | 875.43  | -23.4524 | 2 K.KSIFCTLY chr4@6743 | 3.25E-10 | 0.007232 |
| 24Mar2011  | 8334  | 1106.25 | 8.099488 | 3 K.YPVLSIAL chr3@2651 | 2.70E-10 | 0.005895 |
| 26July2011 | 306   | 478.58  | -10.8205 | 3 R.RRM+15. chrX@2711  | 1.11E-10 | 0.00552  |
| 26July2011 | 3132  | 562.32  | 1.471172 | 2 R.IVFSSK+1 chr5@4695 | 6.10E-11 | 0.001781 |
| 24Mar2011  | 1070  | 531.29  | 25.32251 | 2 R.EMVIDLV chr2@2352  | 1.26E-10 | 0.003816 |
| 29Nov2011  | 7948  | 571.87  | 27.26471 | 2 K.TIRSAQL chr2@7621  | 2.83E-10 | 0.008213 |
| 29Nov2011  | 4671  | 545.33  | 28.67858 | 2 R.RGESVEK chr2@1249  | 2.11E-10 | 0.005508 |
| 29Nov2011  | 4621  | 545.33  | 28.67858 | 2 R.RGESVEK chr2@1249  | 2.27E-10 | 0.005414 |
| 29Nov2011  | 19322 | 1029.05 | 27.42982 | 2 R.FYYRKKG chr1@1381  | 1.35E-10 | 0.004109 |
| 29Nov2011  | 14961 | 791.4   | -18.6872 | 2 _FRSLYGPI chr4@6547  | 2.33E-10 | 0.009387 |
| 29Nov2011  | 17323 | 957.17  | -28.6697 | 3 _FLKNPQN chr5@4128   | 2.83E-10 | 0.008213 |
| 29Nov2011  | 2212  | 959.53  | 2.738089 | 1 K.KNVEEGK chr5@9273  | 2.72E-10 | 0.007167 |
| 29Nov2011  | 2381  | 959.53  | 2.738089 | 1 K.KNVEEGK chr5@9273  | 1.94E-10 | 0.008476 |
| 29Nov2011  | 8454  | 985.84  | 1.75729  | 3 _NFPANRC chr5@1788   | 1.36E-10 | 0.005931 |
| 29Nov2011  | 2536  | 513.29  | 6.680725 | 2 K.VALFYFH chrX@1191  | 3.27E-10 | 0.008296 |
| 26July2011 | 1442  | 516.96  | -21.214  | 3 _NSNFRVL chr1@1160   | 1.91E-11 | 0        |
| 26July2011 | 3135  | 761.39  | -2.35455 | 3 _TIVFTVPL Splice@chr | 8.63E-11 | 0.003343 |
| 26July2011 | 9777  | 682.43  | 7.165671 | 3 K.KTIIKIKD chr2@1431 | 1.19E-10 | 0.002263 |
| 26July2011 | 6547  | 965.47  | 5.414752 | 2 R.K+14.016 chr1@1261 | 3.03E-10 | 0.007051 |
| 24Mar2011  | 3772  | 664.4   | -12.2901 | 2 K.KKFFFPK chr2@1213  | 3.62E-10 | 0.0086   |
| 24Mar2011  | 8168  | 1114.26 | -17.1648 | 3 K.RGESVFF chr5@5865  | 4.03E-10 | 0.005946 |
| 24Mar2011  | 4245  | 666.36  | -3.76106 | 2 R.QKLENIS Splice@chr | 2.90E-12 | 0        |
| 29Nov2011  | 18319 | 1354.72 | -12.6243 | 1 K.FQITNFEI chr1@5083 | 7.79E-11 | 0.002175 |
| 24Mar2011  | 10908 | 842.92  | -16.3113 | 2 R.M+15.99 chrX@3390  | 4.52E-10 | 0.006527 |
| 29Nov2011  | 2176  | 1047.56 | -22.7444 | 1 K.ISENFPAI chr2@1182 | 2.04E-10 | 0.009648 |
| 24Mar2011  | 10039 | 844.95  | -14.7534 | 2 _EM+15.9 Splice@chr  | 1.00E-09 | 0.009003 |
| 26July2011 | 674   | 419.56  | -0.92258 | 3 R.NSICPLPL chr5@1227 | 2.13E-10 | 0.007685 |
| 26July2011 | 247   | 774.38  | -18.0142 | 1 K.QNAEGV chrX@1299   | 1.49E-10 | 0.004432 |

|            |       |         |          |                         |          |          |
|------------|-------|---------|----------|-------------------------|----------|----------|
| 24Mar2011  | 5775  | 787.41  | 10.47789 | 2 K.FRRDFFF: Splice@chr | 5.14E-10 | 0.008336 |
| 24Mar2011  | 9636  | 893.97  | -25.9728 | 2 K.GKCEKGK chr3@349    | 8.72E-10 | 0.007634 |
| 24Mar2011  | 10705 | 646.34  | 19.07461 | 2 _AESLSYG: Splice@chr  | 4.68E-11 | 0.003305 |
| 24Mar2011  | 5262  | 735.34  | 20.08823 | 2 R.QIDFFGF chr1@302    | 1.93E-10 | 0.008678 |
| 24Mar2011  | 1657  | 816.41  | -15.8685 | 1 R.HHNGPV chr4@159     | 6.06E-11 | 4.71E-04 |
| 29Nov2011  | 10234 | 703.62  | -7.19015 | 4 R.FMRDSV: chr3@636    | 1.51E-10 | 0.004974 |
| 24Mar2011  | 14218 | 1094.62 | 23.48066 | 2 K.RRWWM+1 chr4@881    | 5.77E-10 | 0.009117 |
| 29Nov2011  | 4823  | 631.33  | 0.922338 | 2 F.SPPFSIAV chrX@132   | 1.27E-10 | 0.003637 |
| 29Nov2011  | 5029  | 630.82  | -12.3074 | 2 F.SPPFSIAV chrX@132   | 2.60E-10 | 0.00655  |
| 29Nov2011  | 5028  | 631.32  | -14.9707 | 2 F.SPPFSIAV chrX@132   | 5.05E-11 | 0.001142 |
| 24Mar2011  | 18551 | 1088    | -24.1262 | 2 R.SM+15.9 chr4@392    | 1.28E-10 | 0.003903 |
| 26July2011 | 3695  | 751.09  | 19.42099 | 3 K.LWNIGEF chr2@112    | 1.98E-10 | 0.008517 |
| 26July2011 | 7227  | 626.73  | 29.37832 | 3 R.QKEKIIQ: Splice@chr | 1.51E-10 | 0.007222 |
| 26July2011 | 5825  | 631.01  | 9.365238 | 3 R.CRM+15. chr1@132    | 1.75E-10 | 0.003351 |
| 24Mar2011  | 10771 | 970.5   | 5.548096 | 1 _RCQGRHI chr4@579     | 1.60E-10 | 0.001821 |
| 24Mar2011  | 3358  | 669.86  | -22.4479 | 2 K.TK+14.01 chr3@126   | 3.37E-10 | 0.009962 |
| 24Mar2011  | 7867  | 1036.53 | -6.19274 | 1 R.M+15.99 Splice@chr  | 5.37E-10 | 0.004907 |
| 29Nov2011  | 8653  | 618.83  | -6.67202 | 2 _QIMNNFI Splice@chr   | 1.02E-10 | 0.002682 |
| 29Nov2011  | 8194  | 618.83  | -6.67202 | 2 _QIMNNFI Splice@chr   | 1.33E-10 | 0.005704 |
| 29Nov2011  | 9076  | 618.83  | -6.67202 | 2 _QIMNNFI Splice@chr   | 1.26E-10 | 0.005768 |
| 24Mar2011  | 8806  | 1072.21 | -6.76137 | 3 R.NLMYK+: Splice@chr  | 5.02E-11 | 0.003978 |
| 24Mar2011  | 6663  | 906.5   | 17.75    | 1 _MLVPGEI chr4@957     | 3.56E-10 | 0.006938 |
| 29Nov2011  | 1144  | 850.42  | -26.2985 | 1 K.DFGEKVR chrX@153    | 2.10E-10 | 0.006452 |
| 26July2011 | 5271  | 473.76  | -9.231   | 2 K.VTEVETIF chr4@745   | 2.53E-10 | 0.0065   |
| 29Nov2011  | 15589 | 1125.92 | -29.2883 | 3 K.KISM+15 chr4@706    | 2.15E-10 | 0.005944 |
| 24Mar2011  | 11947 | 675.91  | -11.4469 | 2 K.K+14.016 chr1@300   | 4.43E-10 | 0.005742 |
| 26July2011 | 3024  | 650.61  | 23.89938 | 4 R.PLLTKGI chrX@172    | 1.95E-10 | 0.008574 |
| 24Mar2011  | 9354  | 862.46  | 9.32373  | 2 _WK+14.0 chr3@121     | 4.61E-10 | 0.007235 |
| 29Nov2011  | 2003  | 889.47  | 7.762881 | 1 R.DAEKLGE chr2@280    | 2.59E-10 | 0.009606 |
| 26July2011 | 554   | 504.92  | -27.9149 | 3 K.IFSRDHH: chr5@104   | 2.56E-10 | 0.009836 |
| 29Nov2011  | 15032 | 891.46  | 2.810312 | 1 R.IPGEYNA chr1@102    | 2.29E-10 | 0.007116 |
| 26July2011 | 339   | 406.97  | -15.3809 | 4 K.QETTLQF chr2@686    | 9.23E-11 | 0.00189  |
| 29Nov2011  | 20096 | 1024.45 | -27.3727 | 1 _FGDFYSFI chr5@211    | 2.55E-10 | 0.007537 |
| 26July2011 | 1311  | 606.31  | -16.3598 | 5 K.HFNSGFL Splice@chr  | 6.49E-11 | 0.009975 |
| 29Nov2011  | 16524 | 1054.87 | 1.95113  | 3 K.M+15.99 chr3@121    | 2.01E-11 | 4.55E-04 |
| 26July2011 | 1496  | 468.57  | -14.9339 | 3 R.YEILRNEF chr5@102   | 3.89E-10 | 0.009019 |
| 26July2011 | 694   | 524.79  | 24.20532 | 2 S.NSSTAPT chr5@111    | 2.20E-10 | 0.00565  |
| 26July2011 | 2962  | 602.99  | -3.988   | 3 K.TFGTIVYI chr5@137   | 1.18E-10 | 0.003057 |
| 29Nov2011  | 1425  | 946.5   | 4.583344 | 1 R.DNTLNLT chr1@880    | 1.98E-10 | 0.005331 |
| 29Nov2011  | 1093  | 946.5   | 4.583344 | 1 R.DNTLNLT chr1@880    | 2.44E-10 | 0.007158 |
| 29Nov2011  | 1935  | 947.5   | 1.035136 | 1 R.DNTLNLT chr1@880    | 3.13E-10 | 0.007337 |
| 29Nov2011  | 1988  | 947.5   | 1.035136 | 1 R.DNTLNLT chr1@880    | 2.51E-10 | 0.006148 |
| 29Nov2011  | 1620  | 946.5   | 4.583344 | 1 R.DNTLNLT chr1@880    | 7.65E-11 | 0.002649 |
| 29Nov2011  | 1211  | 946.5   | 4.583344 | 1 R.DNTLNLT chr1@880    | 9.08E-11 | 0.003398 |
| 24Mar2011  | 10117 | 875.81  | 27.29216 | 3 R.NYLLVCL: Splice@chr | 5.33E-10 | 0.009713 |
| 26July2011 | 9513  | 919.82  | 7.882891 | 3 K.LYCQILM chr5@147    | 2.42E-11 | 6.48E-04 |
| 29Nov2011  | 11649 | 786.94  | 3.184053 | 2 K.TQKLPET: chr5@347   | 9.88E-11 | 0.003973 |

|            |       |         |          |                         |          |          |
|------------|-------|---------|----------|-------------------------|----------|----------|
| 26July2011 | 2861  | 681.89  | 24.9209  | 4 _LTDHSVS Splice@chr   | 2.32E-10 | 0.009749 |
| 24Mar2011  | 732   | 495.26  | -8.08852 | 2 K.NCVKNV chr1@1209    | 1.46E-10 | 0.00161  |
| 24Mar2011  | 20765 | 779.4   | -16.6031 | 3 L.SLCRVILA chrX@1008  | 2.44E-10 | 0.005844 |
| 24Mar2011  | 9410  | 1128.56 | -17.4298 | 1 _LALKGVM Splice@chr   | 2.19E-10 | 0.009615 |
| 24Mar2011  | 12284 | 972.59  | 12.01345 | 1 _RGPVKAS chr5@6815    | 1.06E-10 | 0.001459 |
| 26July2011 | 29    | 420.72  | -6.61663 | 4 _ELVEELCS Splice@chr  | 5.11E-11 | 0.004184 |
| 26July2011 | 64    | 420.97  | -8.61489 | 4 _ELVEELCS Splice@chr  | 1.15E-10 | 0.002962 |
| 29Nov2011  | 1482  | 585.83  | -22.7511 | 2 K.WLQLLV chrX@1745    | 1.09E-10 | 0.0035   |
| 24Mar2011  | 7904  | 667.36  | 2.473097 | 2 R.RIQENYA Splice@chr  | 9.31E-11 | 0.001012 |
| 24Mar2011  | 5131  | 667.36  | 2.473097 | 2 R.RIQENYA Splice@chr  | 2.67E-10 | 0.004828 |
| 24Mar2011  | 5693  | 667.36  | 2.473097 | 2 R.RIQENYA Splice@chr  | 5.22E-10 | 0.009371 |
| 24Mar2011  | 6177  | 667.36  | 2.473097 | 2 R.RIQENYA Splice@chr  | 9.37E-10 | 0.00793  |
| 26July2011 | 4248  | 613.32  | -16.7207 | 3 _EKIEKKIEI chrX@1465  | 2.00E-10 | 0.005848 |
| 26July2011 | 7563  | 542.29  | -8.51925 | 2 K.GSRKMN chr4@1178    | 7.98E-13 | 0        |
| 26July2011 | 3633  | 714.75  | 9.04133  | 3 K.ILSSLRTP Splice@chr | 1.03E-10 | 0.005215 |
| 29Nov2011  | 7107  | 573.97  | 8.990239 | 3 R.VGDIK+1 chrX@2495   | 1.57E-10 | 0.00461  |
| 26July2011 | 7346  | 779.75  | 22.08696 | 3 K.EKQHTRT chr2@1148   | 9.47E-11 | 0.004697 |
| 29Nov2011  | 16933 | 1034.53 | 17.59885 | 1 R.ESQEKNT chrX@2955   | 7.14E-11 | 0.00282  |
| 29Nov2011  | 12674 | 1100.04 | 7.886084 | 2 R.EQMDEH chr3@8455    | 8.70E-11 | 0.00312  |
| 26July2011 | 510   | 570.29  | -26.7816 | 3 K.PSK+14.0 chr2@4107  | 1.35E-11 | 0.001681 |
| 29Nov2011  | 5447  | 844.48  | 0.437235 | 1 R.NVAMLA chr3@8412    | 5.50E-12 | 5.00E-04 |
| 24Mar2011  | 8731  | 820.95  | 2.124106 | 2 K.LSCDRIF chr3@1220   | 6.93E-10 | 0.00865  |
| 24Mar2011  | 734   | 759.41  | -26.8552 | 2 K.NCIRTLQ chr2@5322   | 3.21E-10 | 0.006875 |
| 24Mar2011  | 13914 | 747.38  | 14.66417 | 4 K.QVSK+14 chr5@7648   | 3.03E-10 | 0.0074   |
| 24Mar2011  | 1885  | 456.29  | -7.50731 | 2 R.VLASPIRF chr5@1182  | 6.50E-10 | 0.008654 |
| 29Nov2011  | 5575  | 717.37  | 3.237669 | 2 G.YLPAVDP Splice@chr  | 3.88E-11 | 0.001743 |
| 26July2011 | 5197  | 817.98  | -15.7633 | 2 K.IKTTRIWI Splice@chr | 9.78E-11 | 0.001984 |
| 24Mar2011  | 9579  | 880.47  | 27.55278 | 2 W.QCTDHL chr3@9682    | 3.32E-10 | 0.009962 |
| 29Nov2011  | 6429  | 974.5   | 9.592752 | 1 _SSPTTQTI Splice@chr  | 8.04E-11 | 0.004413 |
| 26July2011 | 5831  | 824.8   | 13.46629 | 3 R.KVLLM+1 chr5@1645   | 2.93E-11 | 0.001511 |
| 26July2011 | 3398  | 589.8   | -9.43312 | 2 _KFGRTMI chr4@6745    | 9.98E-11 | 0.004902 |
| 26July2011 | 3579  | 419.58  | -28.8438 | 3 R.RRKAGRF chrX@1546   | 5.23E-11 | 0.001781 |
| 24Mar2011  | 425   | 926.46  | -12.0798 | 1 R.YMQART chr5@1287    | 1.56E-10 | 0.001973 |
| 29Nov2011  | 14932 | 1109.59 | 8.977717 | 3 K.LTFM+15 Splice@chr  | 3.44E-10 | 0.008817 |
| 24Mar2011  | 596   | 418.9   | 25.99843 | 3 K.KNSLFVA chr3@5347   | 9.11E-11 | 0.001278 |
| 24Mar2011  | 17669 | 1159.61 | -6.19162 | 2 I.K+14.016 chrX@7012  | 4.20E-10 | 0.008879 |
| 26July2011 | 1435  | 439.91  | -9.3635  | 3 K.TLK+14.0 chr2@1400  | 3.94E-11 | 0        |
| 24Mar2011  | 3545  | 653.36  | 4.397418 | 2 K.KMLNIEN chr5@4398   | 2.90E-10 | 0.004288 |
| 24Mar2011  | 128   | 980.43  | -11.5382 | 1 R.DQSCASF chr1@1235   | 3.77E-10 | 0.00467  |
| 24Mar2011  | 107   | 980.43  | -11.5382 | 1 R.DQSCASF chr1@1235   | 4.82E-10 | 0.006278 |
| 24Mar2011  | 606   | 980.43  | -11.5382 | 1 R.DQSCASF chr1@1235   | 5.74E-10 | 0.007232 |
| 24Mar2011  | 1070  | 980.43  | -11.5382 | 1 R.DQSCASF chr1@1235   | 2.84E-10 | 0.007042 |
| 24Mar2011  | 469   | 980.43  | -11.5382 | 1 R.DQSCASF chr1@1235   | 1.97E-11 | 0        |
| 24Mar2011  | 8815  | 768.89  | -24.3218 | 2 R.FM+15.9 chrX@9155   | 1.63E-10 | 0.001827 |
| 24Mar2011  | 13665 | 768.89  | -24.3218 | 2 R.FM+15.9 chrX@9155   | 3.50E-10 | 0.009462 |
| 24Mar2011  | 2541  | 823.39  | -3.8614  | 1 K.DHLFGHF Splice@chr  | 2.42E-10 | 0.002902 |
| 26July2011 | 5667  | 749.09  | 21.21355 | 3 K.M+15.99 chrX@1631   | 7.15E-11 | 0.003415 |

|            |       |         |          |                         |          |          |
|------------|-------|---------|----------|-------------------------|----------|----------|
| 26July2011 | 718   | 546.29  | -19.2119 | 2 R.EKNSNFP chr2@1408   | 1.81E-10 | 0.009388 |
| 24Mar2011  | 10808 | 1083.96 | -19.8383 | 3 K.TWDAKR Splice@chr   | 2.88E-10 | 0.00185  |
| 29Nov2011  | 15234 | 1234.68 | -13.2185 | 1 K.KCFLHIFL chr5@1492  | 9.92E-11 | 0.004457 |
| 26July2011 | 7365  | 936.2   | 20.47991 | 3 R.IDNRMK( Splice@chr  | 5.62E-11 | 0.002147 |
| 24Mar2011  | 12949 | 937.44  | -26.2921 | 1 _KYSCPGP chrX@2272    | 1.65E-10 | 0.008934 |
| 24Mar2011  | 9470  | 864.45  | -14.1374 | 2 N.LQVCRFA chr3@1142   | 4.69E-10 | 0.008318 |
| 29Nov2011  | 5062  | 762.4   | -15.9211 | 2 K.SRNFEKN chr5@1614   | 1.30E-10 | 0.004701 |
| 29Nov2011  | 9767  | 1021.54 | 17.74292 | 2 T.TCNKMPI chr4@2876   | 2.86E-10 | 0.009731 |
| 24Mar2011  | 3671  | 461.28  | 10.25502 | 3 K.LFKSSKM chr1@1282   | 3.92E-11 | 4.53E-04 |
| 26July2011 | 1992  | 538.28  | -24.5195 | 4 K.SHK+14.C chr3@1106  | 9.24E-11 | 0.008627 |
| 24Mar2011  | 11572 | 773.44  | 7.032548 | 2 R.RKEGGKE chrX@1156   | 3.94E-10 | 0.006085 |
| 24Mar2011  | 6227  | 574.32  | -16.2882 | 2 R.KLCQISEK chr1@1213  | 2.17E-10 | 0.002086 |
| 29Nov2011  | 10911 | 1210.66 | 20.87909 | 3 S.EVPLSVRI chr3@6751  | 8.80E-12 | 7.09E-04 |
| 26July2011 | 6233  | 608.32  | -14.3513 | 4 K.MIKIPAIV chrX@1535  | 1.02E-10 | 0.00879  |
| 29Nov2011  | 13620 | 820.76  | 29.42371 | 3 R.TIFNYGK- chr3@5856  | 2.73E-10 | 0.006749 |
| 24Mar2011  | 8622  | 889.45  | 21.89471 | 2 K.IEGKWYS chr4@1172   | 8.58E-11 | 9.17E-04 |
| 24Mar2011  | 740   | 589.31  | -15.3545 | 2 R.TRDLSHH chr2@2719   | 4.12E-10 | 0.006137 |
| 24Mar2011  | 11478 | 715.71  | -11.4762 | 3 R.TVSRAAE chr2@7161   | 1.00E-10 | 0.001459 |
| 29Nov2011  | 17960 | 989.18  | -21.0823 | 3 _WSAWM chr1@9320      | 1.31E-12 | 3.05E-04 |
| 29Nov2011  | 21299 | 1160.58 | -4.52667 | 1 _KWLNWE chr2@7650     | 1.81E-11 | 4.00E-04 |
| 29Nov2011  | 10868 | 1018.52 | 3.811976 | 2 K.FLEKLTNI chr4@9569  | 2.27E-10 | 0.00959  |
| 24Mar2011  | 17079 | 1160.89 | -22.2994 | 3 R.DCHIGVC chr2@1477   | 1.96E-10 | 0.006037 |
| 24Mar2011  | 13730 | 684.34  | -7.37268 | 2 K.QLFDM+ chr1@9133    | 3.90E-10 | 0.008583 |
| 29Nov2011  | 611   | 639.33  | 7.03519  | 2 R.HERESSK Splice@chr  | 2.19E-10 | 0.009982 |
| 29Nov2011  | 11837 | 918.02  | 15.1518  | 2 K.MLFIVSTI chrX@9685  | 3.42E-10 | 0.009181 |
| 24Mar2011  | 1861  | 517.3   | -5.14539 | 2 K.KEISVSEL chrX@2228  | 4.10E-10 | 0.009581 |
| 29Nov2011  | 14203 | 1157.09 | -19.1114 | 2 R.SSDLMAL chr2@9291   | 1.69E-10 | 0.005322 |
| 24Mar2011  | 8858  | 937.44  | 19.64242 | 1 R.GNMCLV Splice@chr   | 1.13E-10 | 0.001757 |
| 24Mar2011  | 10341 | 1143.6  | 14.88465 | 2 R.AFFVRM- chr5@1055   | 5.39E-10 | 0.008603 |
| 24Mar2011  | 7159  | 1143.6  | 14.88465 | 2 R.AFFVRM- chr5@1055   | 4.16E-10 | 0.009382 |
| 24Mar2011  | 7129  | 1143.6  | 14.88465 | 2 R.AFFVRM- chr5@1055   | 2.09E-10 | 0.004001 |
| 29Nov2011  | 970   | 917.5   | -14.9314 | 1 R.SELLIDAR chr3@5122  | 2.28E-10 | 0.005414 |
| 29Nov2011  | 5467  | 641.01  | 10.91058 | 3 R.EFSVSKM chr5@1873   | 1.93E-10 | 0.007258 |
| 29Nov2011  | 1003  | 580.82  | 9.010066 | 2 K.ENRATTS chrX@1975   | 9.48E-11 | 0.003497 |
| 26July2011 | 2959  | 883.73  | -20.2657 | 3 R.QSRCFLFI chrX@2337  | 2.27E-10 | 0.008892 |
| 24Mar2011  | 4262  | 613.99  | -19.5819 | 3 _DFIEKRGi chr3@1353   | 3.75E-11 | 0.004857 |
| 29Nov2011  | 10117 | 811.43  | -11.3401 | 2 P.CEDLQNT chr5@1018   | 1.84E-10 | 0.00516  |
| 24Mar2011  | 8469  | 870.02  | -1.26423 | 4 _VLDKVSE chr3@1221    | 2.48E-10 | 0.004473 |
| 24Mar2011  | 8137  | 1145.6  | -24.3753 | 3 R.LIQKCLVE chr5@1220  | 2.60E-10 | 0.005215 |
| 26July2011 | 3318  | 621.31  | -18.671  | 3 K.ISEISEIFS chr3@1090 | 6.31E-11 | 0.003114 |
| 29Nov2011  | 6562  | 674.09  | -8.23142 | 4 K.GFVSTAF chrX@4428   | 1.26E-10 | 0.004497 |
| 26July2011 | 7928  | 702.38  | -14.672  | 2 K.QTFVIQL chrX@6811   | 3.60E-11 | 9.01E-04 |
| 24Mar2011  | 1150  | 547.31  | 19.66384 | 2 K.ENRFFRP chr1@1122   | 6.76E-10 | 0.008411 |
| 24Mar2011  | 7951  | 530.31  | -14.5292 | 2 R.KISGNREI chrX@1435  | 2.90E-10 | 0.004301 |
| 24Mar2011  | 7188  | 530.31  | -14.5292 | 2 R.KISGNREI chrX@1435  | 4.92E-10 | 0.006541 |
| 24Mar2011  | 5858  | 530.31  | -14.5292 | 2 R.KISGNREI chrX@1435  | 9.33E-11 | 6.92E-04 |
| 26July2011 | 3528  | 540.29  | 29.08773 | 2 R.QIKDM+1 chr3@1124   | 2.28E-10 | 0.006979 |

|            |       |         |          |                         |          |          |
|------------|-------|---------|----------|-------------------------|----------|----------|
| 26July2011 | 6367  | 601.34  | 6.506856 | 3 K.LLILYKM+ chr5@2026  | 1.70E-10 | 0.003872 |
| 26July2011 | 1245  | 476.29  | -1.79786 | 2 R.KLNLPPN chr5@1804   | 1.85E-10 | 0.007861 |
| 24Mar2011  | 2459  | 512     | 17.65122 | 3 K.KRPRSIIA chr5@1053  | 2.49E-10 | 0.005403 |
| 26July2011 | 7729  | 576.64  | 12.34357 | 3 R.DVVIVNC chrX@1445   | 2.71E-10 | 0.006681 |
| 29Nov2011  | 11037 | 833.46  | 1.725345 | 2 K.KRK+14.C chrX@3430  | 2.39E-10 | 0.006263 |
| 26July2011 | 8391  | 507.95  | -26.8883 | 3 K.KLHIAVVI Splice@chr | 1.78E-10 | 0.008495 |
| 24Mar2011  | 1975  | 772.39  | -24.4238 | 2 K.KPFELLDI chr3@3750  | 3.13E-10 | 0.008094 |
| 26July2011 | 155   | 455.91  | -28.3542 | 3 K.KNAK+14 chr3@3295   | 2.21E-10 | 0.009836 |
| 24Mar2011  | 23191 | 840.92  | 26.98761 | 4 K.CKCVEIFC chrX@1991  | 2.17E-10 | 0.005442 |
| 24Mar2011  | 1715  | 558.28  | -9.74762 | 2 K.QK+14.O chr2@1095   | 5.31E-10 | 0.006724 |
| 26July2011 | 3480  | 494.77  | -26.3906 | 4 R.RRHPTLLI chr5@2700  | 1.71E-10 | 0.006225 |
| 24Mar2011  | 6035  | 741.38  | -14.0636 | 2 K.SRNVLES Splice@chr  | 4.71E-10 | 0.008383 |
| 24Mar2011  | 6383  | 741.37  | -27.5925 | 2 K.SRNVLES Splice@chr  | 5.19E-10 | 0.009091 |
| 24Mar2011  | 5408  | 741.38  | -14.0636 | 2 K.SRNVLES Splice@chr  | 3.08E-10 | 0.006458 |
| 26July2011 | 7269  | 476.27  | -23.8863 | 3 L.LHLLQHP. Splice@chr | 3.62E-10 | 0.007996 |
| 29Nov2011  | 4051  | 1082.52 | -24.0227 | 2 _QLVYFEEI chrX@9571   | 1.37E-10 | 0.00416  |
| 29Nov2011  | 12127 | 917.48  | -20.222  | 2 K.WREIK+1 chr2@4710   | 3.65E-11 | 0.002556 |
| 29Nov2011  | 17168 | 950.47  | 13.22665 | 3 K.QTKTEKS Splice@chr  | 1.04E-10 | 0.002968 |
| 29Nov2011  | 9370  | 1290.68 | -28.6788 | 1 R.NLGAQLI chr5@2091   | 3.17E-10 | 0.007502 |
| 26July2011 | 3630  | 629.83  | -10.8293 | 2 K.EPVSMN' chrX@1146   | 5.25E-11 | 0.001936 |
| 24Mar2011  | 7698  | 937.96  | -5.44112 | 2 P.CLARPQE Splice@chr  | 6.55E-10 | 0.009087 |
| 26July2011 | 1377  | 620.82  | -23.4362 | 2 R.LM+15.9' Splice@chr | 5.67E-10 | 0.008174 |
| 24Mar2011  | 5908  | 1088.05 | -28.3941 | 2 _SCAYVFIII Splice@chr | 2.40E-10 | 0.003355 |
| 26July2011 | 5177  | 841.97  | 13.42707 | 4 R.RHFVDKY chr3@2993   | 6.77E-11 | 0.003066 |
| 29Nov2011  | 17670 | 1186.62 | 6.721917 | 2 _KYLVCVSI chr1@4898   | 2.40E-11 | 0.001174 |
| 26July2011 | 1081  | 493.75  | -2.60123 | 2 R.SENYAFK chr5@7473   | 6.52E-11 | 0        |
| 24Mar2011  | 10433 | 983.53  | -21.9177 | 4 K.LKKKLILK chr1@9281  | 1.70E-10 | 0.003827 |
| 24Mar2011  | 11102 | 939.23  | -17.6823 | 4 _NSNLPLK chr5@2034    | 2.97E-10 | 0.002017 |
| 26July2011 | 702   | 567.63  | -6.03215 | 3 R.RHCFYLK chr4@1450   | 6.12E-11 | 0        |
| 24Mar2011  | 24345 | 725.46  | -1.13668 | 2 K.KNPKKKF chr3@1788   | 7.94E-11 | 0.002061 |
| 24Mar2011  | 7536  | 1023.87 | -12.3949 | 3 K.CFLTRGV chr3@1163   | 6.13E-10 | 0.007486 |
| 24Mar2011  | 18090 | 1132.55 | -29.0188 | 2 G.WLLFWG Splice@chr   | 7.93E-10 | 0.009666 |
| 26July2011 | 115   | 549.6   | -4.56303 | 3 R.FCMRK+1 chr5@1841   | 1.43E-10 | 0.004585 |
| 26July2011 | 5149  | 651.66  | -4.34747 | 3 K.AYLFFSEL chr4@1286  | 4.48E-11 | 0.001781 |
| 26July2011 | 2674  | 543.27  | 0.525264 | 3 _NLFSVVS chr4@5588    | 4.28E-11 | 0.003404 |
| 29Nov2011  | 9443  | 675.36  | -2.89742 | 1 K.GGQVSAI chr4@4053   | 2.51E-10 | 0.008256 |
| 26July2011 | 8060  | 740.9   | 25.07818 | 2 K.LYFFLLEF Splice@chr | 1.57E-10 | 0.008177 |
| 26July2011 | 9105  | 740.9   | 25.07818 | 2 K.LYFFLLEF Splice@chr | 2.91E-10 | 0.009895 |
| 24Mar2011  | 4674  | 555.32  | 10.35042 | 2 K.FSTQLSLS Splice@chr | 9.89E-12 | 1.52E-04 |
| 26July2011 | 1446  | 674.37  | -4.29039 | 3 R.KNEENPL chr2@1486   | 1.55E-10 | 0.006124 |
| 24Mar2011  | 6121  | 820.95  | -22.2317 | 2 R.KLFSFPLS Splice@chr | 2.37E-10 | 0.003109 |
| 24Mar2011  | 11901 | 617.29  | -20.3023 | 2 R.LDPDIKN chrX@6272   | 7.85E-11 | 0.005534 |
| 29Nov2011  | 12948 | 1062.56 | -6.59285 | 3 Y.HRVVLDS Splice@chr  | 5.34E-13 | 4.73E-04 |
| 29Nov2011  | 12859 | 1062.55 | -16.0222 | 3 Y.HRVVLDS Splice@chr  | 5.92E-15 | 0        |
| 29Nov2011  | 12983 | 1062.55 | -16.0222 | 3 Y.HRVVLDS Splice@chr  | 4.88E-14 | 0        |
| 29Nov2011  | 13020 | 1062.55 | -16.0222 | 3 Y.HRVVLDS Splice@chr  | 1.45E-13 | 0        |
| 29Nov2011  | 12912 | 1062.56 | -6.59285 | 3 Y.HRVVLDS Splice@chr  | 1.93E-13 | 0        |

|            |       |         |          |                         |          |          |
|------------|-------|---------|----------|-------------------------|----------|----------|
| 29Nov2011  | 12889 | 1062.55 | -16.0222 | 3 Y.HRVVLDS Splice@chr  | 8.08E-14 | 0        |
| 29Nov2011  | 13057 | 1062.55 | -16.0222 | 3 Y.HRVVLDS Splice@chr  | 7.79E-11 | 0.003689 |
| 29Nov2011  | 10492 | 1116.18 | -6.1299  | 2 K.KMIRRRRII chr1@6141 | 2.99E-10 | 0.00832  |
| 29Nov2011  | 11317 | 703.87  | -1.80177 | 4 K.IYLQM+1 chr1@3698   | 4.75E-11 | 0.001489 |
| 24Mar2011  | 1707  | 419.23  | 26.66923 | 2 R.FPSSAATI chrX@5739  | 1.92E-10 | 0.002214 |
| 24Mar2011  | 1174  | 447.73  | -22.6799 | 2 K.YLGLDWI chr2@1199   | 4.00E-10 | 0.007345 |
| 24Mar2011  | 4479  | 622.84  | -14.0358 | 2 K.ICSVRVAI Splice@chr | 1.03E-10 | 8.78E-04 |
| 24Mar2011  | 13957 | 1002.05 | -8.69166 | 2 R.ILVM+15 chr2@1146   | 1.88E-10 | 0.002018 |
| 24Mar2011  | 10045 | 1002.02 | 1.190652 | 2 R.QK+14.0 chr2@2934   | 1.03E-09 | 0.009306 |
| 26July2011 | 2028  | 458.58  | 4.802032 | 3 K.EDWRVG chr1@6771    | 1.34E-10 | 0.003376 |
| 26July2011 | 1452  | 603.83  | -26.9315 | 2 K.KTTVSHK chr4@1539   | 3.49E-10 | 0.00565  |
| 26July2011 | 8705  | 678.62  | -7.18521 | 4 K.MEHRFQ Splice@chr   | 2.61E-10 | 0.009091 |
| 29Nov2011  | 2589  | 587.4   | 28.72853 | 2 K.FLVK+14. chr1@3691  | 1.14E-10 | 0.003322 |
| 24Mar2011  | 9741  | 873.94  | -9.43907 | 2 K.ITWENN5 chr2@9656   | 3.49E-10 | 0.005858 |
| 24Mar2011  | 14353 | 696.55  | 8.023521 | 5 R.EIWK+14 chr4@5076   | 6.08E-11 | 6.25E-04 |
| 24Mar2011  | 15511 | 696.55  | 8.023521 | 5 R.EIWK+14 chr4@5076   | 4.89E-10 | 0.009808 |
| 24Mar2011  | 6729  | 696.55  | 8.023521 | 5 R.EIWK+14 chr4@5076   | 5.75E-11 | 0.001725 |
| 24Mar2011  | 7136  | 696.55  | 8.023521 | 5 R.EIWK+14 chr4@5076   | 3.11E-10 | 0.006174 |
| 24Mar2011  | 6928  | 696.55  | 8.023521 | 5 R.EIWK+14 chr4@5076   | 2.72E-11 | 0.001143 |
| 24Mar2011  | 19003 | 696.55  | 8.023521 | 5 R.EIWK+14 chr4@5076   | 1.86E-11 | 6.42E-04 |
| 24Mar2011  | 9682  | 696.55  | 8.023521 | 5 R.EIWK+14 chr4@5076   | 3.86E-11 | 0.002598 |
| 29Nov2011  | 2668  | 814.86  | 7.993318 | 2 R.SSAGGW chrX@1744    | 8.91E-11 | 0.003398 |
| 29Nov2011  | 12265 | 1077.57 | -20.0495 | 2 V.K+14.016 chr4@1240  | 1.43E-11 | 9.13E-04 |
| 29Nov2011  | 11895 | 1077.57 | -20.0495 | 2 V.K+14.016 chr4@1240  | 1.87E-11 | 0.001517 |
| 29Nov2011  | 12993 | 1077.57 | -20.0495 | 2 V.K+14.016 chr4@1240  | 2.15E-11 | 0.00128  |
| 29Nov2011  | 13930 | 1077.57 | -20.0495 | 2 V.K+14.016 chr4@1240  | 6.42E-12 | 7.79E-04 |
| 29Nov2011  | 13969 | 1077.57 | -20.0495 | 2 V.K+14.016 chr4@1240  | 1.08E-11 | 7.79E-04 |
| 29Nov2011  | 13156 | 1077.57 | -20.0495 | 2 V.K+14.016 chr4@1240  | 4.03E-11 | 9.39E-04 |
| 29Nov2011  | 13119 | 1077.57 | -20.0495 | 2 V.K+14.016 chr4@1240  | 4.19E-11 | 9.39E-04 |
| 29Nov2011  | 14158 | 1077.57 | -20.0495 | 2 V.K+14.016 chr4@1240  | 6.20E-11 | 0.002697 |
| 26July2011 | 8056  | 909.99  | 11.12022 | 2 K.NQEFRGI chr4@1596   | 1.74E-10 | 0.004114 |
| 24Mar2011  | 18276 | 907.21  | 3.99236  | 4 _VGDLSWI Splice@chr   | 5.91E-11 | 0.00161  |
| 24Mar2011  | 16692 | 907.2   | -7.05658 | 4 _VGDLSWI Splice@chr   | 6.26E-10 | 0.007689 |
| 24Mar2011  | 15866 | 907.21  | 3.99236  | 4 _VGDLSWI Splice@chr   | 6.36E-11 | 0.002144 |
| 24Mar2011  | 9068  | 907.21  | 3.99236  | 4 _VGDLSWI Splice@chr   | 4.04E-10 | 0.007345 |
| 29Nov2011  | 4559  | 630.82  | -1.25983 | 2 R.FKETHGR chr1@9748   | 1.53E-10 | 0.004324 |
| 29Nov2011  | 4404  | 630.82  | -1.25983 | 2 R.FKETHGR chr1@9748   | 1.74E-10 | 0.006528 |
| 24Mar2011  | 9910  | 864.44  | 15.22108 | 4 _RALSDGK Splice@chr   | 2.97E-10 | 0.006515 |
| 29Nov2011  | 5873  | 745.37  | 4.509832 | 1 R.SSPMAPF chr4@1049   | 7.32E-11 | 0.002824 |
| 29Nov2011  | 6896  | 745.37  | 4.509832 | 1 R.SSPMAPF chr4@1049   | 7.32E-11 | 0.001825 |
| 29Nov2011  | 1267  | 861.38  | -10.2863 | 1 _NTGMGP Splice@chr    | 2.91E-12 | 2.29E-04 |
| 29Nov2011  | 1305  | 861.38  | -10.2863 | 1 _NTGMGP Splice@chr    | 2.91E-12 | 2.29E-04 |
| 29Nov2011  | 20072 | 1204.6  | -21.1618 | 1 R.PKNLTNT chr4@5946   | 3.22E-10 | 0.008012 |
| 26July2011 | 2293  | 633.84  | 7.426521 | 2 R.RRMDEFI chrX@1261   | 2.41E-10 | 0.009397 |
| 26July2011 | 3326  | 828.42  | -21.7193 | 3 K.KLSEIGIS chr4@7702  | 1.79E-10 | 0.007846 |
| 26July2011 | 9124  | 800.94  | 26.83849 | 2 F.RFPFCFVI chr3@6325  | 4.39E-10 | 0.009019 |
| 29Nov2011  | 8111  | 1085.52 | -29.7144 | 2 R.QLIDVPEI chr5@1815  | 6.63E-11 | 0.001428 |

|            |       |         |          |                        |          |          |
|------------|-------|---------|----------|------------------------|----------|----------|
| 26July2011 | 61    | 459.26  | 4.262137 | 3 K.SLNPIYTP chr5@5295 | 5.78E-10 | 0.008174 |
| 29Nov2011  | 7363  | 1152.61 | 12.64715 | 2 _PIHIFSDC chr3@5064  | 1.67E-10 | 0.00648  |
| 24Mar2011  | 11976 | 974.18  | -18.9671 | 3 D.NCDKVV\ chr3@4087  | 2.60E-10 | 0.00397  |
| 24Mar2011  | 1783  | 775.42  | -28.0573 | 2 K.FLKPFRR\ chr4@3981 | 2.26E-10 | 0.002175 |
| 29Nov2011  | 1609  | 770.34  | -13.8835 | 2 R.LCESGAA Splice@chr | 5.41E-12 | 7.09E-04 |
| 26July2011 | 6688  | 758.43  | 5.724879 | 3 K.K+14.016 chr2@1001 | 2.68E-10 | 0.009615 |
| 29Nov2011  | 12955 | 1029.05 | -10.6865 | 2 R.HYK+14.( chr2@1475 | 1.42E-10 | 0.004578 |
| 24Mar2011  | 6932  | 859.48  | -0.92427 | 2 R.MSRSHF\ chr1@7477  | 3.45E-10 | 0.009427 |
| 29Nov2011  | 9173  | 930.47  | -25.9836 | 2 R.AMISVKA Splice@chr | 3.85E-10 | 0.009119 |
| 29Nov2011  | 9786  | 1240.68 | -0.19694 | 1 R.TVVVPQ\ Splice@chr | 1.56E-12 | 4.73E-04 |
| 29Nov2011  | 9215  | 1240.69 | 7.779115 | 1 R.TVVVPQ\ Splice@chr | 9.55E-11 | 0.004734 |
| 29Nov2011  | 9786  | 1240.68 | -0.19694 | 1 R.TVVVPQ\ Splice@chr | 6.75E-11 | 0.001827 |
| 29Nov2011  | 9753  | 1240.68 | -0.19694 | 1 R.TVVVPQ\ Splice@chr | 4.72E-12 | 5.38E-04 |
| 29Nov2011  | 10809 | 1240.68 | -0.19694 | 1 R.TVVVPQ\ Splice@chr | 6.76E-12 | 4.50E-04 |
| 29Nov2011  | 10764 | 1240.68 | -0.19694 | 1 R.TVVVPQ\ Splice@chr | 1.28E-11 | 5.76E-04 |
| 29Nov2011  | 10989 | 1240.68 | -0.19694 | 1 R.TVVVPQ\ Splice@chr | 1.04E-11 | 7.79E-04 |
| 29Nov2011  | 10939 | 1240.68 | -0.19694 | 1 R.TVVVPQ\ Splice@chr | 1.76E-10 | 0.005109 |
| 29Nov2011  | 10951 | 1241.68 | -2.90313 | 1 R.TVVVPQ\ Splice@chr | 1.05E-11 | 7.79E-04 |
| 29Nov2011  | 11044 | 1240.68 | -0.19694 | 1 R.TVVVPQ\ Splice@chr | 1.05E-10 | 0.003196 |
| 29Nov2011  | 10960 | 1240.68 | -0.19694 | 1 R.TVVVPQ\ Splice@chr | 2.36E-10 | 0.006455 |
| 29Nov2011  | 21250 | 1161.58 | -2.2088  | 1 K.EVPM+15 chr4@1630  | 1.57E-10 | 0.004157 |
| 29Nov2011  | 8441  | 809.42  | -24.6879 | 2 _WRLCIICL Splice@chr | 2.87E-10 | 0.008863 |
| 29Nov2011  | 8440  | 809.92  | -26.7628 | 2 _WRLCIICL Splice@chr | 1.47E-10 | 0.004324 |
| 26July2011 | 271   | 527.01  | 24.96558 | 3 K.K+14.016 chr2@2565 | 5.20E-11 | 0.002436 |
| 26July2011 | 7429  | 756.9   | -9.36643 | 2 K.TSSKFGKI chr2@1220 | 1.80E-10 | 0.008188 |
| 26July2011 | 406   | 473.76  | 17.36506 | 2 R.EATTSGP chr5@6245  | 2.29E-11 | 0        |
| 29Nov2011  | 13543 | 918.52  | -2.36166 | 2 K.FPHFNLT chrX@1608  | 1.91E-10 | 0.005752 |
| 26July2011 | 966   | 475.76  | -21.2766 | 2 _RLHHYPK chr4@1154   | 1.17E-10 | 0.007123 |
| 26July2011 | 4019  | 538.3   | -7.19447 | 3 K.VFICIMA\ chr2@1448 | 2.12E-10 | 0.008403 |
| 29Nov2011  | 13941 | 984.51  | 28.05145 | 1 _DVSFSCK chr4@1192   | 2.41E-10 | 0.007401 |
| 24Mar2011  | 4221  | 629.37  | -25.5455 | 2 R.QSEK+14 chr3@4950  | 4.31E-10 | 0.007177 |
| 26July2011 | 7733  | 739.41  | 8.97607  | 2 R.KIDTNNS chr1@1047  | 1.29E-10 | 0.007738 |
| 24Mar2011  | 4789  | 576.68  | 14.11085 | 3 R.ELVHLNN Splice@chr | 2.07E-10 | 0.005183 |
| 24Mar2011  | 16096 | 1023.04 | -11.0822 | 2 R.LHDCKLN chr2@9245  | 1.90E-10 | 0.005582 |
| 24Mar2011  | 11703 | 814.11  | -4.57992 | 3 K.PNWK+1 chr5@8216   | 3.13E-10 | 0.004295 |
| 24Mar2011  | 9379  | 738.39  | -9.84986 | 1 K.MAVYVR Splice@chr  | 7.16E-10 | 0.008901 |
| 24Mar2011  | 7322  | 738.39  | -9.84986 | 1 K.MAVYVR Splice@chr  | 7.16E-10 | 0.006759 |
| 24Mar2011  | 1374  | 915.45  | -17.1699 | 1 K.YEFAEKK chr1@1337  | 3.08E-10 | 0.006333 |
| 24Mar2011  | 9616  | 1016.04 | -21.3857 | 2 R.SPREMK+ chr5@1464  | 9.24E-12 | 0.001973 |
| 24Mar2011  | 10705 | 827.07  | -19.9983 | 3 K.KVIVEQEI chr5@6380 | 2.95E-10 | 0.00345  |
| 26July2011 | 1911  | 572.97  | 16.00704 | 3 R.GNGWTE chrX@1866   | 8.00E-11 | 0.002556 |
| 24Mar2011  | 6271  | 834.47  | -19.7459 | 2 _SK+14.01 chr2@4405  | 2.51E-10 | 0.002824 |
| 24Mar2011  | 7846  | 687.74  | -7.73393 | 5 R.PVSFGM- chr3@1146  | 2.74E-10 | 0.00698  |
| 29Nov2011  | 4275  | 738.36  | -28.1431 | 2 K.KSIFNSE chr3@1175  | 2.95E-10 | 0.007129 |
| 24Mar2011  | 6091  | 816.88  | -0.03611 | 2 S.NFRSDNL Splice@chr | 2.77E-10 | 0.0052   |
| 24Mar2011  | 6395  | 816.88  | -0.03611 | 2 S.NFRSDNL Splice@chr | 3.86E-10 | 0.007345 |
| 24Mar2011  | 6434  | 816.88  | -0.03611 | 2 S.NFRSDNL Splice@chr | 1.95E-11 | 2.68E-04 |

|            |       |         |          |                         |          |          |
|------------|-------|---------|----------|-------------------------|----------|----------|
| 24Mar2011  | 6632  | 816.88  | -0.03611 | 2 S.NFRSDNL Splice@chr  | 1.05E-09 | 0.009455 |
| 29Nov2011  | 3246  | 1043.59 | 28.92073 | 1 K.SSTHQSK chr5@2798   | 3.77E-10 | 0.009765 |
| 29Nov2011  | 3163  | 1043.59 | 28.92073 | 1 K.SSTHQSK chr5@2798   | 1.88E-10 | 0.007952 |
| 29Nov2011  | 10227 | 578.32  | 27.75275 | 3 R.SLVGHTS Splice@chr  | 1.01E-10 | 0.003042 |
| 26July2011 | 4740  | 730.38  | -25.329  | 2 R.RTTIFEKF chr1@1251  | 1.47E-10 | 0.006711 |
| 24Mar2011  | 4330  | 584.32  | -20.4035 | 2 K.MKASSK+ chrX@1385   | 2.16E-10 | 0.005551 |
| 24Mar2011  | 7899  | 614.98  | -0.56247 | 3 _IFGDK+1+ chr3@1335   | 1.56E-10 | 0.008314 |
| 24Mar2011  | 4835  | 463.25  | -7.39427 | 3 K.ISQKKNTI Splice@chr | 1.81E-10 | 0.005829 |
| 24Mar2011  | 3753  | 529.8   | 23.89328 | 2 K.TICLGPEII chr3@6314 | 3.29E-10 | 0.003698 |
| 24Mar2011  | 3245  | 529.8   | 23.89328 | 2 K.TICLGPEII chr3@6314 | 4.29E-10 | 0.006138 |
| 26July2011 | 7426  | 770.38  | -27.7651 | 2 M.DMMK+ chr2@7964     | 1.85E-10 | 0.009388 |
| 24Mar2011  | 9111  | 864.45  | 27.48032 | 2 _FLYREIFC chr4@1351   | 6.02E-10 | 0.00922  |
| 24Mar2011  | 5234  | 723.36  | -21.517  | 2 K.VETLDLM chr5@5775   | 2.07E-10 | 0.002417 |
| 29Nov2011  | 7221  | 448.94  | -27.0427 | 3 K.NKTLKNK chr4@6387   | 3.00E-10 | 0.009733 |
| 24Mar2011  | 9241  | 1140.1  | 12.32408 | 2 R.FSNRTHE chr5@9416   | 4.71E-10 | 0.008619 |
| 26July2011 | 4452  | 635.3   | -26.75   | 2 R.K+14.016 chr3@8812  | 2.62E-11 | 0.006135 |
| 26July2011 | 6240  | 552.28  | -3.3215  | 2 K.HVSPMID Splice@chr  | 8.00E-11 | 0.00406  |
| 24Mar2011  | 553   | 410.21  | 9.709791 | 2 K.EGGKEGC chr4@5275   | 2.79E-11 | 0        |
| 24Mar2011  | 535   | 410.21  | 9.709791 | 2 K.EGGKEGC chr4@5275   | 3.33E-10 | 0.003698 |
| 24Mar2011  | 22410 | 781.9   | -11.4895 | 2 L.ESLLEQVI chr1@2055  | 4.39E-10 | 0.009353 |
| 24Mar2011  | 5829  | 688.4   | -26.4594 | 2 S.TK+14.01 chrX@1682  | 1.90E-10 | 0.004506 |
| 26July2011 | 2578  | 759.91  | 8.605613 | 2 P.LCLIPSTI chr2@1154  | 1.43E-10 | 0.006658 |
| 29Nov2011  | 8490  | 752.47  | -11.1739 | 2 R.LKSLKM+ chr4@6762   | 1.28E-10 | 0.003999 |
| 29Nov2011  | 11165 | 793.44  | -29.6528 | 2 K.EK+14.01 chr4@1695  | 1.43E-10 | 0.004906 |
| 29Nov2011  | 9737  | 794.05  | -19.1707 | 3 _WM+15.5 chr2@3294    | 2.86E-10 | 0.009155 |
| 29Nov2011  | 10716 | 794.05  | -19.1707 | 3 _WM+15.5 chr2@3294    | 1.77E-10 | 0.003528 |
| 29Nov2011  | 10143 | 794.05  | -19.1707 | 3 _WM+15.5 chr2@3294    | 1.55E-10 | 0.006273 |
| 29Nov2011  | 8923  | 794.05  | -19.1707 | 3 _WM+15.5 chr2@3294    | 7.10E-11 | 0.00282  |
| 24Mar2011  | 10653 | 621.34  | -8.81132 | 2 K.NYILKM+ chr4@1486   | 2.40E-10 | 0.00639  |
| 24Mar2011  | 6543  | 621.34  | -8.81132 | 2 K.NYILKM+ chr4@1486   | 2.93E-10 | 0.005333 |
| 29Nov2011  | 118   | 887.46  | -11.0164 | 1 K.RAEIENR. chr5@1047  | 3.31E-10 | 0.008012 |
| 29Nov2011  | 140   | 887.46  | -11.0164 | 1 K.RAEIENR. chr5@1047  | 3.10E-10 | 0.00709  |
| 29Nov2011  | 13675 | 1044.03 | -18.1186 | 2 _FQLM+15 Splice@chr   | 3.30E-10 | 0.008525 |
| 24Mar2011  | 8269  | 920.49  | -5.94304 | 2 R.IPATCILV Splice@chr | 5.53E-10 | 0.009542 |
| 26July2011 | 3534  | 571.81  | 5.05557  | 4 _MGNGPV chr4@3664     | 1.01E-10 | 0.005848 |
| 26July2011 | 7797  | 634.02  | -13.7941 | 3 R.RGM+15. chr5@5648   | 1.74E-10 | 0.005469 |
| 24Mar2011  | 10109 | 762.4   | -4.35645 | 3 R.NLNIMG5 chr5@2841   | 1.89E-10 | 0.002102 |
| 26July2011 | 8119  | 703.08  | 12.28707 | 3 R.HSEGSSP Splice@chr  | 1.95E-10 | 0.008237 |
| 24Mar2011  | 3504  | 692.38  | 4.502361 | 2 _QKPNKM chr1@1767     | 1.50E-11 | 0        |
| 26July2011 | 3630  | 552.3   | -3.65351 | 2 _ESLGLSW chr4@3645    | 1.53E-10 | 0.007738 |
| 29Nov2011  | 17565 | 1202.67 | 4.932779 | 1 R.RWRWRW\ chr4@4996   | 2.34E-10 | 0.00739  |
| 29Nov2011  | 8304  | 691.33  | 25.64114 | 1 R.SGSGGGC chr1@1075   | 2.69E-13 | 2.27E-04 |
| 24Mar2011  | 5010  | 548.84  | -21.2793 | 2 K.IKPNVTRI Splice@chr | 2.25E-10 | 0.002569 |
| 24Mar2011  | 11652 | 1174.1  | -7.26022 | 2 K.SMNNRN chr4@1395    | 3.73E-11 | 6.53E-04 |
| 26July2011 | 1083  | 426.23  | 0        | 4 K.M+15.99 Splice@chr  | 1.08E-10 | 0.005567 |
| 26July2011 | 1530  | 567.94  | -2.87089 | 3 R.EAM+15. Splice@chr  | 2.49E-10 | 0.007795 |
| 26July2011 | 7720  | 716.39  | -22.0494 | 3 R.LSALISKE chr1@2295  | 2.94E-10 | 0.006828 |

|            |       |         |          |                         |          |          |
|------------|-------|---------|----------|-------------------------|----------|----------|
| 29Nov2011  | 703   | 575.34  | 19.97945 | 2 R.RSLDSFRI chr5@181   | 9.60E-11 | 0.00706  |
| 29Nov2011  | 12556 | 1007.01 | 21.0952  | 2 K.QYPNVYL chr5@153    | 1.89E-10 | 0.005643 |
| 24Mar2011  | 2094  | 517.33  | 14.77664 | 2 K.KKKSGSA chr3@113    | 1.74E-10 | 0.004155 |
| 24Mar2011  | 10149 | 476.25  | -1.95845 | 4 R.ELYVSQT: Splice@chr | 2.22E-10 | 0.005442 |
| 24Mar2011  | 7241  | 476.25  | -1.95845 | 4 R.ELYVSQT: Splice@chr | 5.19E-10 | 0.009948 |
| 24Mar2011  | 3726  | 429.25  | -19.383  | 3 R.VVTKNG/ chr5@164    | 1.22E-10 | 0.001278 |
| 24Mar2011  | 8328  | 538.63  | 15.21298 | 3 R.TNIVSPEI Splice@chr | 2.81E-10 | 0.003898 |
| 26July2011 | 4691  | 601.67  | 13.5486  | 3 R.NAKSQCT Splice@chr  | 1.11E-10 | 0.006089 |
| 26July2011 | 6576  | 586.3   | 29.40825 | 3 F.QGEKGEF chr4@140    | 3.67E-10 | 0.008429 |
| 24Mar2011  | 931   | 419.23  | 26.66923 | 2 R.PFSATGT chr1@106    | 3.54E-10 | 0.007513 |
| 26July2011 | 4144  | 533.98  | 21.5066  | 3 R.EATKDAC chrX@329    | 2.50E-11 | 5.13E-04 |
| 26July2011 | 270   | 578.94  | -1.40813 | 3 R.LRRHCCF Splice@chr  | 1.23E-10 | 0.006678 |
| 29Nov2011  | 17365 | 916.14  | -28.5323 | 3 K.CVITAQR chrX@101    | 8.27E-11 | 0.003871 |
| 24Mar2011  | 17972 | 789.96  | 3.86813  | 2 K.FGHRLFK chr1@287    | 1.47E-10 | 0.003725 |
| 29Nov2011  | 3223  | 1044.59 | -5.14676 | 2 R.EERLEIVY chr1@611   | 1.71E-10 | 0.004494 |
| 24Mar2011  | 4478  | 686.42  | 2.095751 | 2 K.LLSETTG Splice@chr  | 2.47E-10 | 0.004473 |
| 24Mar2011  | 7032  | 743.9   | 9.826158 | 2 K.NVYFGPN chr2@142    | 1.98E-10 | 0.008112 |
| 29Nov2011  | 1395  | 471.26  | 7.073735 | 2 R.TPTVPPS: chr2@308   | 2.08E-10 | 0.005508 |
| 29Nov2011  | 1530  | 471.26  | 7.073735 | 2 R.TPTVPPS: chr2@308   | 2.34E-10 | 0.005662 |
| 24Mar2011  | 1826  | 569.38  | 24.16241 | 2 _EVGGLILL chr1@157    | 1.06E-10 | 0.001204 |
| 24Mar2011  | 2107  | 569.38  | 24.16241 | 2 _EVGGLILL chr1@157    | 5.66E-11 | 6.16E-04 |
| 24Mar2011  | 2183  | 569.38  | 24.16241 | 2 _EVGGLILL chr1@157    | 4.00E-10 | 0.005485 |
| 29Nov2011  | 13435 | 1181.57 | -9.38656 | 2 K.M+15.99 Splice@chr  | 2.51E-10 | 0.007512 |
| 29Nov2011  | 14840 | 1155.05 | 24.64648 | 2 R.RITSATD: chr2@104   | 1.24E-11 | 6.07E-04 |
| 26July2011 | 4103  | 747.38  | 5.420214 | 4 R.RAAIFEN: chr2@132   | 2.65E-11 | 9.51E-04 |
| 29Nov2011  | 15722 | 800.98  | 27.84904 | 2 K.VIGRVKFI chrX@127   | 1.23E-10 | 0.004065 |
| 26July2011 | 4985  | 543.54  | 21.71307 | 4 _WWLGG\ Splice@chr    | 2.62E-10 | 0.009615 |
| 24Mar2011  | 10265 | 988.58  | 20.97522 | 1 R.RRRNETR chr2@110    | 5.82E-10 | 0.009883 |
| 24Mar2011  | 13849 | 846.48  | -14.4091 | 2 R.GLNRNK+1 chr4@132   | 2.52E-10 | 0.003208 |
| 24Mar2011  | 1056  | 564.79  | -16.6718 | 2 _KCKMYLS chr2@146     | 3.89E-10 | 0.007008 |
| 29Nov2011  | 18382 | 895.5   | -26.2786 | 3 _CGK+14.( chr2@116    | 4.63E-11 | 0.001007 |
| 26July2011 | 4099  | 879.2   | -10.008  | 4 _EK+14.01 chr1@746    | 1.46E-10 | 0.005858 |
| 26July2011 | 2964  | 555.31  | -18.2512 | 3 K.LFFFSK+1 chr3@116   | 1.59E-10 | 0.007748 |
| 29Nov2011  | 17088 | 1258.62 | -3.00901 | 2 K.RRETALH Splice@chr  | 8.42E-11 | 0.002816 |
| 29Nov2011  | 7103  | 1050.99 | 9.800655 | 2 R.SYLLKNEI Splice@chr | 1.82E-11 | 0.001015 |
| 24Mar2011  | 12701 | 760.4   | -25.0593 | 3 R.ILMK+14. chr4@129   | 7.70E-11 | 0.007121 |
| 29Nov2011  | 1536  | 584.34  | -4.70841 | 2 R.YKLFLVEC Splice@chr | 9.33E-11 | 0.002811 |
| 24Mar2011  | 1838  | 504.26  | 28.19873 | 2 K.NEFEFPPI chrX@115   | 2.01E-10 | 0.002115 |
| 29Nov2011  | 11308 | 681.67  | -21.5    | 3 R.NYIKSEEK chr5@164   | 3.25E-10 | 0.009455 |
| 24Mar2011  | 8935  | 915.99  | 18.4113  | 2 Q.ESK+14.( Splice@chr | 2.12E-10 | 0.005183 |
| 26July2011 | 225   | 415.55  | 16.58876 | 3 K.AAQDRE/ Splice@chr  | 1.48E-10 | 0.007738 |
| 26July2011 | 3176  | 606.31  | -6.83807 | 5 R.K+14.016 chr5@118   | 1.32E-10 | 0.00721  |
| 26July2011 | 2829  | 676.34  | -0.36151 | 2 R.RMSNK+: chr5@104    | 2.84E-11 | 0.001613 |
| 29Nov2011  | 5100  | 1386.15 | -27.9359 | 2 R.KRLIFGYF chr3@128   | 2.22E-10 | 0.006091 |
| 29Nov2011  | 5030  | 1386.65 | -29.1469 | 2 R.KRLIFGYF chr3@128   | 2.05E-10 | 0.00563  |
| 29Nov2011  | 4487  | 1386.65 | -29.1469 | 2 R.KRLIFGYF chr3@128   | 2.01E-10 | 0.006093 |
| 29Nov2011  | 2543  | 859.45  | -18.4596 | 2 G.M+15.99 Splice@chr  | 1.08E-10 | 0.003366 |

|            |       |         |          |                         |          |          |
|------------|-------|---------|----------|-------------------------|----------|----------|
| 29Nov2011  | 17464 | 1042.05 | -2.19861 | 2 R.HLFMRE\ chr2@1106   | 1.04E-10 | 0.003659 |
| 24Mar2011  | 1767  | 535.36  | 2.170236 | 2 K.KLKEAPK\ chr5@5262  | 6.67E-11 | 0.003331 |
| 29Nov2011  | 15915 | 1069.06 | -17.122  | 2 K.RIFETK+1 chr1@5656  | 1.23E-10 | 0.003777 |
| 24Mar2011  | 132   | 878.46  | 2.01723  | 1 R.KSGGSSL chr1@1192   | 6.52E-11 | 0        |
| 26July2011 | 5713  | 632.33  | -5.60731 | 3 R.NECLKLQ chr3@1193   | 6.47E-11 | 0.001168 |
| 24Mar2011  | 7837  | 1074.56 | -16.0105 | 2 R.LFYVLLD\ chrX@5743  | 1.87E-10 | 0.002754 |
| 29Nov2011  | 8332  | 1154.62 | -6.00669 | 2 _M+15.99 Splice@chr   | 1.80E-11 | 8.63E-04 |
| 29Nov2011  | 5639  | 1093.53 | 1.899457 | 1 R.EIQSEQG Splice@chr  | 1.85E-11 | 9.08E-04 |
| 29Nov2011  | 274   | 484.74  | 13.5172  | 2 W.SSSSGRC chr4@1226   | 2.02E-10 | 0.004868 |
| 24Mar2011  | 8682  | 944.51  | -8.65395 | 4 K.IQYSNKS\ chr5@1440  | 1.04E-10 | 0.001902 |
| 26July2011 | 63    | 478.58  | 26.04963 | 3 K.FQFFK+1 chr4@5583   | 4.74E-10 | 0.009772 |
| 29Nov2011  | 19431 | 1272.62 | -9.77056 | 2 R.ESRQCTG chr3@4269   | 2.31E-10 | 0.006591 |
| 29Nov2011  | 17904 | 1114.54 | 27.15918 | 1 _TFASEESC chrX@1635   | 2.06E-10 | 0.00563  |
| 29Nov2011  | 14034 | 1114.53 | 18.16162 | 1 _TFASEESC chrX@1635   | 1.21E-10 | 0.006248 |
| 29Nov2011  | 972   | 735.86  | -28.132  | 2 D.RFFATK+ chr2@5778   | 1.09E-10 | 0.003575 |
| 26July2011 | 929   | 494.27  | 17.0761  | 3 _TIPISSKM chr5@1485   | 7.02E-12 | 9.96E-04 |
| 29Nov2011  | 11438 | 716.96  | -20.9417 | 2 R.RRKFSGK chr3@6871   | 1.42E-10 | 0.00416  |
| 24Mar2011  | 6550  | 1118.54 | -21.6089 | 2 R.GFCLVSK chr2@1313   | 5.22E-10 | 0.006724 |
| 29Nov2011  | 11177 | 818.44  | -10.4533 | 2 K.LQYLQLT\ chr2@1390  | 9.58E-11 | 0.002518 |
| 29Nov2011  | 13049 | 818.44  | -10.4533 | 2 K.LQYLQLT\ chr2@1390  | 8.36E-11 | 0.002584 |
| 29Nov2011  | 13095 | 818.44  | -10.4533 | 2 K.LQYLQLT\ chr2@1390  | 1.53E-10 | 0.003924 |
| 29Nov2011  | 12151 | 818.44  | -10.4533 | 2 K.LQYLQLT\ chr2@1390  | 1.78E-10 | 0.003528 |
| 29Nov2011  | 10475 | 818.44  | -10.4533 | 2 K.LQYLQLT\ chr2@1390  | 1.11E-10 | 0.005537 |
| 29Nov2011  | 9936  | 818.44  | -10.4533 | 2 K.LQYLQLT\ chr2@1390  | 2.92E-10 | 0.009687 |
| 29Nov2011  | 9980  | 818.44  | -10.4533 | 2 K.LQYLQLT\ chr2@1390  | 1.31E-10 | 0.004568 |
| 29Nov2011  | 11319 | 818.44  | -10.4533 | 2 K.LQYLQLT\ chr2@1390  | 1.85E-10 | 0.007952 |
| 24Mar2011  | 1866  | 417.72  | -18.1617 | 2 K.WTTSALF chr5@2081   | 2.72E-10 | 0.003329 |
| 24Mar2011  | 3069  | 447.24  | -27.6933 | 3 K.KNPENPT chr5@3607   | 2.55E-10 | 0.002824 |
| 29Nov2011  | 697   | 473.26  | -11.3086 | 2 R.SSARGQL chrX@1667   | 1.86E-10 | 0.005335 |
| 24Mar2011  | 1719  | 562.81  | 15.10143 | 2 R.ALEVVD\ chr5@3752   | 8.49E-11 | 0.007121 |
| 24Mar2011  | 7054  | 661.84  | -10.3443 | 2 R.KNACML\ chrX@4728   | 1.70E-10 | 0.007524 |
| 29Nov2011  | 12927 | 715.36  | -17.3443 | 4 K.FELSDK+ chr5@7442   | 4.89E-11 | 0.001538 |
| 26July2011 | 1069  | 716.36  | 17.74726 | 2 R.FQANPQ\ Splice@chr  | 3.17E-12 | 0        |
| 24Mar2011  | 310   | 497.04  | -21.9634 | 4 K.KFEKTET\ chr1@1519  | 2.84E-10 | 0.002867 |
| 24Mar2011  | 11621 | 859.96  | -5.29561 | 2 _FISVQFHI chr3@7969   | 7.99E-11 | 0.00145  |
| 24Mar2011  | 13806 | 859.96  | -5.29561 | 2 _FISVQFHI chr3@7969   | 5.95E-11 | 4.63E-04 |
| 24Mar2011  | 1583  | 713.1   | -24.0709 | 4 T.VFLIVFDP chr3@8981  | 6.05E-10 | 0.008937 |
| 24Mar2011  | 14015 | 663.35  | -28.9086 | 2 P.DRMNRP chrX@3182    | 2.39E-10 | 0.005485 |
| 26July2011 | 2244  | 562.81  | -2.11849 | 2 K.TSGFVTR chr2@6920   | 4.67E-11 | 0        |
| 29Nov2011  | 11113 | 739.41  | -1.2946  | 3 _AWFK+14 Splice@chr   | 1.68E-11 | 6.63E-04 |
| 24Mar2011  | 21434 | 1011.55 | 5.617085 | 2 K.MILIHK+ chr1@4434   | 3.50E-10 | 0.007633 |
| 24Mar2011  | 11110 | 1075.12 | 11.93315 | 2 R.DRLYLLP\ chr3@6807  | 2.61E-10 | 0.006091 |
| 24Mar2011  | 16434 | 1116.12 | 27.36802 | 2 Y.EKKIYEN\ chr4@1348  | 3.39E-10 | 0.007686 |
| 29Nov2011  | 12831 | 847.9   | -8.54397 | 2 R.KSFELDV\ Splice@chr | 2.50E-10 | 0.006455 |
| 29Nov2011  | 15988 | 669.7   | -5.78074 | 3 R.RRM+15. Splice@chr  | 7.39E-11 | 0.003231 |
| 24Mar2011  | 18202 | 899.94  | 9.981017 | 2 _EFQELTEI Splice@chr  | 4.39E-10 | 0.008604 |
| 29Nov2011  | 2392  | 946.5   | -3.35679 | 1 K.MVVNNL chr3@3206    | 1.98E-10 | 0.005772 |

|            |       |         |          |                          |          |          |
|------------|-------|---------|----------|--------------------------|----------|----------|
| 24Mar2011  | 6757  | 1118.04 | -25.2263 | 2 L.LHHHRVL Splice@chr   | 1.89E-10 | 0.002754 |
| 29Nov2011  | 3309  | 1278.65 | -25.1932 | 1 K.K+14.016 chrX@827    | 2.84E-10 | 0.009137 |
| 29Nov2011  | 9344  | 796.89  | -14.5706 | 2 L.ESLLEEN Splice@chr   | 1.38E-10 | 0.004255 |
| 26July2011 | 6644  | 855.98  | -18.7748 | 2 K.KAK+14.C chrX@115    | 2.06E-11 | 0.002894 |
| 26July2011 | 749   | 509.28  | -16.2511 | 3 K.QVWKVK chr1@489      | 1.48E-10 | 0.002941 |
| 26July2011 | 297   | 469.59  | 2.605106 | 3 K.RSIFATM chrX@133     | 1.26E-10 | 0.009524 |
| 29Nov2011  | 13389 | 571.3   | -25.3998 | 3 K.RIGSRKF chr4@918     | 3.03E-10 | 0.009687 |
| 26July2011 | 577   | 547.3   | 15.195   | 3 K.ILM+15.9 chrX@645    | 2.60E-11 | 6.19E-04 |
| 24Mar2011  | 5123  | 469.76  | -1.95291 | 2 R.SPSAPTH Splice@chr   | 3.21E-10 | 0.006875 |
| 24Mar2011  | 11041 | 778.9   | -26.6764 | 2 R.EWNVVN chr1@143      | 4.62E-10 | 0.007427 |
| 29Nov2011  | 18229 | 1004.48 | -11.2523 | 1 K.SLHNTNY chr2@908     | 1.41E-10 | 0.006101 |
| 26July2011 | 3826  | 725.36  | 25.05684 | 4 _._ESSNTCT chr3@131    | 2.06E-10 | 0.008582 |
| 26July2011 | 3527  | 664.35  | 1.381951 | 3 K.K+14.016 Splice@chr  | 3.29E-11 | 0.003741 |
| 26July2011 | 2468  | 583.29  | -0.90844 | 3 K.FAMSFFS chr1@133     | 5.00E-11 | 0.003137 |
| 29Nov2011  | 2243  | 474.27  | -3.41897 | 2 R.ATGGSAL chr5@106     | 1.54E-10 | 0.003924 |
| 24Mar2011  | 1798  | 756.39  | 1.131206 | 2 K.KTAEHVE chr5@100     | 2.72E-14 | 0        |
| 24Mar2011  | 1788  | 504.59  | -10.6657 | 3 K.KTAEHVE Splice@chr   | 4.15E-10 | 0.008349 |
| 24Mar2011  | 1852  | 756.39  | 1.131206 | 2 K.KTAEHVE Splice@chr   | 8.01E-13 | 0        |
| 26July2011 | 3649  | 550.82  | -8.05362 | 2 K.NILVGRN chr1@171     | 2.91E-11 | 0.002894 |
| 26July2011 | 461   | 602.33  | 27.30467 | 2 R.DNSVSVL chr5@634     | 2.06E-10 | 0.007685 |
| 24Mar2011  | 2452  | 414.58  | -25.088  | 3 K.RTRNANI chr5@807     | 2.93E-10 | 0.006327 |
| 29Nov2011  | 3001  | 963     | -21.042  | 2 _._VFADDYE chr4@498    | 5.20E-11 | 0.004388 |
| 29Nov2011  | 3022  | 963     | -21.042  | 2 _._VFADDYE chr4@498    | 5.67E-11 | 0.004756 |
| 29Nov2011  | 1203  | 458.26  | -19.4881 | 3 K.KISKK+14 chr4@149    | 1.36E-10 | 0.004461 |
| 24Mar2011  | 20473 | 1165.58 | -1.37991 | 3 _._DNKSWH chrX@103     | 2.80E-10 | 0.006727 |
| 24Mar2011  | 22411 | 1165.58 | -1.37991 | 3 _._DNKSWH chrX@103     | 7.64E-11 | 0.002061 |
| 29Nov2011  | 4494  | 569.3   | -21.873  | 2 R.SRRTSSS chr4@431     | 8.61E-11 | 0.002309 |
| 26July2011 | 744   | 533.27  | -2.48475 | 3 K.MKSADS chrX@835      | 2.19E-10 | 0.003436 |
| 26July2011 | 9926  | 745.15  | -14.1074 | 4 K.FKNPEKD chr4@220     | 2.76E-10 | 0.006681 |
| 26July2011 | 5635  | 527.26  | -25.5924 | 3 K.RCGKK+1 chr2@418     | 6.81E-11 | 0.002206 |
| 24Mar2011  | 13802 | 870.52  | 14.39012 | 2 R.KLWKIGC chrX@462     | 4.10E-10 | 0.005485 |
| 24Mar2011  | 12381 | 662.35  | -26.3019 | 4 _._FFFRNSTI chr2@108   | 2.61E-10 | 0.006091 |
| 24Mar2011  | 7826  | 794.89  | -14.1461 | 2 R.SEFWKAL Splice@chr   | 1.03E-09 | 0.009306 |
| 26July2011 | 3794  | 659.33  | -23.9194 | 3 K.LNKTRFL chr1@348     | 4.67E-11 | 0.001813 |
| 26July2011 | 799   | 788.4   | -25.5795 | 2 K.K+14.016 Splice@chr  | 3.19E-11 | 0.002423 |
| 29Nov2011  | 9422  | 806.93  | 25.06836 | 2 R.VEKK+14 chr5@208     | 2.49E-10 | 0.00932  |
| 29Nov2011  | 13795 | 925.52  | 25.11963 | 3 R.KFFEKNT chr3@282     | 2.67E-10 | 0.008811 |
| 26July2011 | 1210  | 582.26  | 9.618319 | 2 R.EEEEEEG chr3@106     | 6.29E-11 | 0.002441 |
| 26July2011 | 8725  | 751.14  | -28.7913 | 4 R.FRRFNFL Splice@chr   | 1.70E-10 | 0.003351 |
| 26July2011 | 2072  | 661.42  | 9.944405 | 2 _._KYKFIHsk chr4@837   | 6.08E-12 | 0        |
| 24Mar2011  | 14129 | 1018.55 | -8.33756 | 2 K.LFPWRCI Splice@chr   | 3.48E-10 | 0.004348 |
| 24Mar2011  | 10289 | 1018.55 | -8.33756 | 2 K.LFPWRCI Splice@chr   | 3.79E-10 | 0.007392 |
| 24Mar2011  | 11423 | 1018.55 | -8.33756 | 2 K.LFPWRCI Splice@chr   | 9.81E-10 | 0.008551 |
| 26July2011 | 3796  | 650.33  | 17.29598 | 4 R.SNPRCSC chr2@136     | 8.09E-11 | 0.003883 |
| 29Nov2011  | 2917  | 951.5   | -27.6756 | 1 K.KTIAESFR chr4@490    | 3.19E-10 | 0.008795 |
| 29Nov2011  | 12906 | 1099.08 | -14.6739 | 2 R.MRRLLFP Splice@chr   | 1.15E-10 | 0.005139 |
| 26July2011 | 6426  | 791.06  | -13.9056 | 3 _._ISVSFSLV Splice@chr | 1.24E-10 | 0.005279 |

|            |       |         |          |                         |          |          |
|------------|-------|---------|----------|-------------------------|----------|----------|
| 29Nov2011  | 8357  | 1152.61 | 3.633042 | 2 R.ACNTQVI chrX@1390   | 9.45E-11 | 0.003166 |
| 26July2011 | 5402  | 999.51  | -5.52288 | 3 K.NSIFSK+1 Splice@chr | 1.28E-11 | 5.79E-04 |
| 29Nov2011  | 12621 | 645.66  | -10.9827 | 3 K.MNETQE chr2@1084    | 2.11E-10 | 0.005944 |
| 29Nov2011  | 9579  | 847.94  | 19.16997 | 2 L.SCKDGTR Splice@chr  | 2.84E-10 | 0.009137 |
| 24Mar2011  | 2610  | 485.24  | 4.06819  | 4 K.ASDAWD Splice@chr   | 2.11E-11 | 4.23E-04 |
| 29Nov2011  | 3360  | 794.42  | 12.32683 | 1 R.HATRHA1 chr4@4166   | 1.79E-10 | 0.006769 |
| 29Nov2011  | 6472  | 682.02  | 23.90035 | 3 K.YANCMK chr5@2462    | 3.72E-11 | 0.002555 |
| 24Mar2011  | 9048  | 888.49  | 0.654927 | 2 _LRSWNA1 chr3@1411    | 7.23E-10 | 0.009025 |
| 24Mar2011  | 1981  | 1051.53 | 12.08491 | 1 _FQASDAk chr2@5015    | 2.53E-10 | 0.004609 |
| 24Mar2011  | 10748 | 872.44  | -22.8094 | 2 K.LSCAVVF chr5@9575   | 6.58E-10 | 0.005654 |
| 29Nov2011  | 10416 | 545.62  | -19.4252 | 3 Q.RM+15.9 chr5@3388   | 3.46E-10 | 0.009105 |
| 26July2011 | 5576  | 689.04  | -3.87449 | 3 K.K+14.016 chr1@1205  | 1.26E-10 | 0.00404  |
| 29Nov2011  | 19064 | 1288.16 | -20.373  | 2 _CTAVSAS Splice@chr   | 3.36E-12 | 4.86E-04 |
| 29Nov2011  | 13702 | 683.37  | 23.88288 | 2 K.FWNVLEI chr3@1304   | 3.03E-11 | 0.001688 |
| 29Nov2011  | 19210 | 792.15  | -18.5783 | 4 K.SGTIFDNI Splice@chr | 1.26E-11 | 8.95E-04 |
| 29Nov2011  | 3545  | 433.76  | 2.609238 | 2 _IVDLPGPI chr3@1104   | 1.59E-10 | 0.005108 |
| 29Nov2011  | 1080  | 435.2   | 14.7798  | 2 K.SSSSNGS chr4@1361   | 3.08E-10 | 0.007838 |
| 29Nov2011  | 534   | 408.2   | 18.7627  | 2 _FGGNYEK chr3@5442    | 2.07E-10 | 0.005772 |
| 29Nov2011  | 9416  | 1345.63 | -24.7692 | 2 _QVREMH Splice@chr    | 7.59E-11 | 0.002935 |
| 29Nov2011  | 12113 | 752.37  | -29.649  | 2 R.AEEIEEK+ chr2@1375  | 8.14E-11 | 0.003016 |
| 29Nov2011  | 19175 | 792.15  | -18.5783 | 4 K.SGTIFDNI Splice@chr | 5.83E-14 | 0        |
| 29Nov2011  | 81    | 722.35  | 3.723    | 1 R.FQGGGEI chr1@2595   | 3.33E-10 | 0.008644 |
| 29Nov2011  | 7145  | 566.31  | 21.45326 | 2 R.EVAQLEC chr5@1706   | 4.79E-11 | 0.001912 |
| 29Nov2011  | 1911  | 401.74  | 27.30093 | 2 R.IEAGGGC chr5@8776   | 4.58E-12 | 6.23E-04 |
| 29Nov2011  | 13384 | 821.43  | -9.71306 | 2 _FTEITNEv Splice@chr  | 1.70E-14 | 0        |
| 29Nov2011  | 15355 | 1275.6  | -25.4649 | 3 R.YSSECPE chr5@1000   | 5.16E-12 | 6.23E-04 |
| 29Nov2011  | 3403  | 537.8   | -5.57144 | 2 K.DQGMLN chr5@2025    | 7.53E-11 | 0.002935 |
| 29Nov2011  | 7683  | 975.56  | -2.75567 | 1 K.LPKLDAYI chr4@1149  | 2.94E-10 | 0.00772  |
| 29Nov2011  | 8257  | 625.82  | -20.2839 | 2 R.K+14.016 chrX@1356  | 4.26E-11 | 0.001912 |
| 29Nov2011  | 16343 | 1324.68 | 5.809954 | 1 R.MFTPLFE Splice@chr  | 4.51E-12 | 6.23E-04 |
| 29Nov2011  | 7464  | 639.65  | -12.525  | 3 R.NLM+15. chr1@5405   | 1.46E-10 | 0.004752 |
| 29Nov2011  | 2991  | 731.41  | -4.43201 | 1 _KDATAPK chr3@7059    | 1.18E-10 | 0.003783 |
| 29Nov2011  | 6716  | 1086.02 | 18.22629 | 2 V.CLTEEGK Splice@chr  | 1.69E-11 | 0.001398 |
| 29Nov2011  | 13336 | 1077.07 | -18.4907 | 2 V.K+14.016 chr4@1240  | 1.04E-10 | 0.004334 |
| 29Nov2011  | 14522 | 988.05  | 18.46899 | 2 K.FDYFNMI chr4@1602   | 3.01E-10 | 0.009635 |
| 29Nov2011  | 1240  | 560.8   | -5.07258 | 2 R.SSMVGR1 chrX@1738   | 1.78E-10 | 0.006359 |
| 29Nov2011  | 5851  | 1025.62 | -1.90621 | 1 K.LGLGSGL chr5@4945   | 1.41E-12 | 5.60E-04 |
| 29Nov2011  | 6493  | 843.46  | -10.4326 | 1 R.TSAAPAG Splice@chr  | 5.89E-11 | 0.003287 |
| 29Nov2011  | 6042  | 1161.68 | -2.15604 | 1 K.NSKDKLV chr5@1250   | 2.58E-10 | 0.008669 |
| 29Nov2011  | 7870  | 565.83  | 14.11658 | 2 R.ISLTNANI chr5@7795  | 2.16E-10 | 0.007848 |
| 29Nov2011  | 5844  | 752.88  | -14.2545 | 2 R.GKCNGG chr4@5126    | 3.04E-10 | 0.00988  |
| 29Nov2011  | 17485 | 1122.58 | 9.904408 | 2 R.TFDDVLY Splice@chr  | 2.18E-10 | 0.007848 |
| 29Nov2011  | 7566  | 625.82  | -20.2839 | 2 R.K+14.016 chrX@1356  | 2.77E-11 | 0.00167  |
| 29Nov2011  | 15880 | 857.95  | -13.2476 | 2 R.RM+15.9 chr1@1195   | 1.83E-11 | 0.001398 |
| 29Nov2011  | 2764  | 433.55  | -23.4869 | 3 K.SLESLNRI chr3@1032  | 9.75E-11 | 0.003928 |
| 29Nov2011  | 13279 | 1077.07 | -18.4907 | 2 V.K+14.016 chr4@1240  | 2.19E-11 | 0.001398 |
| 29Nov2011  | 18019 | 989.53  | -24.3686 | 2 N.FRLLVIFS chr1@1191  | 3.02E-10 | 0.009763 |

|           |       |         |          |                          |          |          |
|-----------|-------|---------|----------|--------------------------|----------|----------|
| 29Nov2011 | 16854 | 1019.83 | -9.02599 | 3 R.QQSPEN( Splice@chr   | 8.84E-11 | 0.003523 |
| 29Nov2011 | 15585 | 1325.68 | 3.275484 | 1 R.MFTPLFE Splice@chr   | 7.38E-11 | 0.003287 |
| 29Nov2011 | 7118  | 870.57  | 10.89471 | 1 _ .TPLAKLAI Splice@chr | 3.14E-10 | 0.009965 |
| 29Nov2011 | 3128  | 537.3   | 7.397674 | 2 K.IAENSVEI chr3@1076   | 3.07E-10 | 0.009965 |
| 29Nov2011 | 11199 | 719.39  | 28.86707 | 2 R.FTQAGSE Splice@chr   | 9.23E-14 | 2.28E-04 |
| 29Nov2011 | 11204 | 784.43  | -16.4086 | 2 D.FKESEKSI chrX@7057   | 2.57E-10 | 0.008669 |
| 29Nov2011 | 8625  | 1346.13 | -3.69865 | 2 _ .QVREMH Splice@chr   | 2.50E-10 | 0.008165 |
| 29Nov2011 | 6286  | 566.31  | 21.45326 | 2 R.EVAQLEC chr5@1706    | 4.55E-11 | 0.002652 |
| 29Nov2011 | 1290  | 560.8   | -5.07258 | 2 R.SSMVGR\ chrX@1738    | 3.75E-11 | 0.00225  |
| 29Nov2011 | 8572  | 1345.63 | -24.7692 | 2 _ .QVREMH Splice@chr   | 3.13E-10 | 0.009965 |
| 29Nov2011 | 13270 | 1077.57 | -20.0495 | 2 V.KK+14.01 chr4@1240   | 1.23E-11 | 0.001398 |
| 29Nov2011 | 18664 | 1287.65 | -26.8489 | 2 _ .CTAVSAS Splice@chr  | 3.90E-12 | 6.67E-04 |
| 29Nov2011 | 18807 | 917.51  | 5.964791 | 2 _ .SIMSRLEI Splice@chr | 1.47E-10 | 0.005608 |
| 29Nov2011 | 3892  | 1073.56 | 20.18419 | 2 L.KIDDFEII chr4@1685   | 9.17E-11 | 0.003662 |
| 29Nov2011 | 11248 | 719.39  | 28.86707 | 2 R.FTQAGSE Splice@chr   | 5.99E-14 | 0        |
| 29Nov2011 | 7070  | 870.57  | 10.89471 | 1 _ .TPLAKLAI Splice@chr | 3.05E-10 | 0.00988  |
| 29Nov2011 | 9515  | 1335.58 | 0.02368  | 2 _ .IESSYDKE Splice@chr | 2.99E-16 | 0        |
| 29Nov2011 | 3728  | 446.75  | 3.354779 | 2 R.IFSAGELF chr3@5608   | 1.87E-10 | 0.006875 |
| 29Nov2011 | 18109 | 1077.57 | -20.0495 | 2 V.K+14.016 chr4@1240   | 8.96E-12 | 4.80E-04 |
| 29Nov2011 | 15073 | 779.44  | 12.54541 | 1 R.LLSIGGG\ chr3@1550   | 1.18E-10 | 0.003454 |
| 29Nov2011 | 3048  | 1059.54 | -17.6437 | 1 _ .YDHKNAI chr5@1738   | 2.73E-10 | 0.007311 |
| 29Nov2011 | 9691  | 724.35  | 19.12636 | 3 V.CLTEEGK Splice@chr   | 4.32E-11 | 0.001448 |
| 29Nov2011 | 19526 | 1231.98 | -3.48768 | 3 _ .KNYSFFPI chrX@8592  | 5.01E-11 | 0.001535 |
| 29Nov2011 | 16536 | 685.88  | 4.188613 | 2 K.IVPGGGA chrX@1570    | 8.22E-18 | 0        |
| 29Nov2011 | 24103 | 968.47  | 23.9199  | 3 _ .GCSIVPIS Splice@chr | 6.66E-11 | 0.002049 |
| 29Nov2011 | 25073 | 1288.15 | -28.1526 | 2 _ .CTAVSAS Splice@chr  | 5.70E-13 | 2.07E-04 |
| 29Nov2011 | 5490  | 1073.56 | 20.18419 | 2 L.KIDDFEII chr4@1685   | 2.20E-10 | 0.006237 |
| 29Nov2011 | 9721  | 1086.02 | 18.22629 | 2 V.CLTEEGK Splice@chr   | 1.37E-10 | 0.003935 |
| 29Nov2011 | 15622 | 719.39  | 28.86707 | 2 R.FTQAGSE Splice@chr   | 2.60E-13 | 0        |
| 29Nov2011 | 13044 | 943.58  | 7.576255 | 1 K.GSK+14.( chrX@1205   | 2.77E-10 | 0.007311 |
| 29Nov2011 | 8619  | 1161.66 | -19.4191 | 1 K.NSKDKLV chr5@1250    | 2.75E-10 | 0.007311 |
| 29Nov2011 | 25027 | 1288.16 | -20.373  | 2 _ .CTAVSAS Splice@chr  | 1.81E-10 | 0.004874 |
| 29Nov2011 | 8514  | 677.34  | -8.57314 | 2 K.MQQFST\ chr5@2080    | 4.41E-11 | 0.001448 |
| 29Nov2011 | 12266 | 1345.13 | -23.5213 | 2 _ .QVREMH Splice@chr   | 2.57E-10 | 0.007173 |
| 29Nov2011 | 19622 | 835.45  | -7.2977  | 4 R.K+14.016 chrX@9996   | 2.77E-10 | 0.007311 |
| 29Nov2011 | 8423  | 1025.62 | -1.90621 | 1 K.LGLGSGL chr5@4945    | 3.09E-12 | 2.07E-04 |
| 29Nov2011 | 17593 | 1092.06 | -15.9774 | 2 K.VQYLMAI chr5@2035    | 1.80E-10 | 0.004793 |
| 29Nov2011 | 16378 | 531.27  | 16.65195 | 3 K.VCIEFEFP chrX@1228   | 2.40E-10 | 0.007031 |
| 29Nov2011 | 25360 | 963.14  | 25.74479 | 3 _ .GCSIVPIS Splice@chr | 1.22E-11 | 4.80E-04 |
| 29Nov2011 | 21922 | 1385.75 | 14.42536 | 1 K.FQNFAQI chr2@2226    | 1.19E-10 | 0.003454 |
| 29Nov2011 | 25119 | 1288.15 | -28.1526 | 2 _ .CTAVSAS Splice@chr  | 1.45E-10 | 0.004085 |
| 29Nov2011 | 21634 | 1094.05 | 18.24135 | 2 R.SCSFFFNI chrX@8486   | 1.28E-10 | 0.003694 |
| 29Nov2011 | 25074 | 1287.65 | -26.8489 | 2 _ .CTAVSAS Splice@chr  | 9.89E-11 | 0.003054 |
| 29Nov2011 | 23166 | 1263.6  | -8.48632 | 2 I.QFSCLLAI chr5@1735   | 3.02E-10 | 0.008333 |
| 29Nov2011 | 20338 | 1089.19 | -10.6033 | 3 Q.LMLLQYI chr1@1055    | 1.55E-11 | 4.80E-04 |
| 29Nov2011 | 18151 | 1077.57 | -20.0495 | 2 V.KK+14.01 chr4@1240   | 3.54E-11 | 0.001011 |
| 29Nov2011 | 9285  | 573.97  | 8.990239 | 3 R.VGDIK+1 chrX@2495    | 1.40E-10 | 0.004014 |

|           |       |         |          |                          |          |          |
|-----------|-------|---------|----------|--------------------------|----------|----------|
| 29Nov2011 | 24060 | 968.14  | -16.9813 | 3 _AVPFVPI\$ Splice@chr  | 1.99E-10 | 0.005595 |
| 29Nov2011 | 3947  | 411.55  | -26.8589 | 3 K.ALQM+1! chr3@112\$   | 2.45E-10 | 0.007031 |
| 29Nov2011 | 7930  | 437.23  | 15.48445 | 3 R.VMLMIS( chr2@584\$   | 8.46E-11 | 0.002725 |
| 29Nov2011 | 9738  | 724.35  | 19.12636 | 3 V.CLTEEGK Splice@chr   | 1.08E-11 | 4.80E-04 |
| 29Nov2011 | 25172 | 1288.16 | -20.373  | 2 _CTAVSAS Splice@chr    | 4.16E-11 | 0.001365 |
| 29Nov2011 | 15574 | 719.39  | 28.86707 | 2 R.FTQAGSE Splice@chr   | 3.06E-14 | 0        |
| 29Nov2011 | 16437 | 531.27  | 16.65195 | 3 K.VCIEFEFP chrX@122\$  | 4.25E-11 | 0.001365 |
| 29Nov2011 | 21887 | 1063.87 | -6.04876 | 3 K.SGDAGIV Splice@chr   | 2.47E-10 | 0.007031 |
| 29Nov2011 | 18333 | 849.93  | 18.38221 | 2 Q.DSSYFVE Splice@chr   | 5.58E-12 | 3.07E-04 |
| 29Nov2011 | 4626  | 876.41  | -8.50606 | 1 K.TEDEARR chrX@113\$   | 4.26E-11 | 0.001365 |
| 29Nov2011 | 5543  | 1073.56 | 20.18419 | 2 L.KIDDFEII chr4@168\$  | 1.59E-10 | 0.004394 |
| 29Nov2011 | 5542  | 626.3   | -9.76097 | 2 R.LCESGAA Splice@chr   | 1.86E-16 | 0        |
| 29Nov2011 | 11797 | 1173.17 | -9.30319 | 3 K.PTMRTCC Splice@chr   | 9.11E-11 | 0.002975 |
| 29Nov2011 | 23188 | 1263.61 | -0.55529 | 2 I.QFSCLLAI chr5@173\$  | 2.16E-10 | 0.005991 |
| 29Nov2011 | 13162 | 662.87  | 23.12012 | 2 S.INM+15.5 chr4@255\$  | 1.40E-10 | 0.004014 |
| 29Nov2011 | 11853 | 1173.51 | -4.63363 | 3 K.PTMRTCC Splice@chr   | 8.92E-13 | 2.07E-04 |
| 29Nov2011 | 26314 | 545.82  | 18.37321 | 2 R.RANNLFS chrX@330\$   | 1.87E-10 | 0.005034 |
| 29Nov2011 | 13053 | 944.58  | 4.081799 | 1 _SPLFVPKI chrX@440\$   | 1.30E-10 | 0.003694 |
| 29Nov2011 | 10742 | 625.82  | -20.2839 | 2 R.K+14.016 chrX@135\$  | 2.67E-10 | 0.007311 |
| 29Nov2011 | 20515 | 895     | -10.9918 | 2 K.M+15.99 chrX@144\$   | 4.19E-11 | 0.001365 |
| 29Nov2011 | 22862 | 783.46  | 9.282677 | 2 K.MLK+14.1 chr5@167\$  | 1.72E-10 | 0.004552 |
| 29Nov2011 | 16892 | 858.48  | 6.006088 | 3 _LETGIKPI Splice@chr   | 1.60E-11 | 4.80E-04 |
| 29Nov2011 | 21959 | 1384.75 | 16.84983 | 1 K.FQNFAQI chr2@222\$   | 2.27E-10 | 0.006392 |
| 29Nov2011 | 15155 | 833.46  | -21.6039 | 2 R.RRVK+14 chr2@213\$   | 1.34E-10 | 0.00377  |
| 29Nov2011 | 20462 | 1143.54 | 8.191279 | 3 K.NMITGTS Splice@chr   | 7.77E-11 | 0.002385 |
| 29Nov2011 | 22518 | 805.96  | -7.24438 | 2 R.FLIKSELEI chr3@608\$ | 3.10E-10 | 0.008486 |
| 29Nov2011 | 21404 | 889.95  | -19.8868 | 2 K.RSSVHTE chr2@844\$   | 1.65E-10 | 0.004394 |
| 29Nov2011 | 4531  | 876.41  | -8.50606 | 1 K.TEDEARR chrX@113\$   | 4.26E-11 | 0.001365 |
| 29Nov2011 | 18092 | 761.62  | -1.82546 | 4 S.RTEDPNL Splice@chr   | 8.67E-14 | 0        |
| 29Nov2011 | 5680  | 794.43  | -5.96418 | 2 R.TK+14.01 chr1@723\$  | 1.90E-10 | 0.005448 |
| 29Nov2011 | 13103 | 944.58  | 4.081799 | 1 _SPLFVPKI chrX@440\$   | 1.30E-10 | 0.003694 |
| 29Nov2011 | 17506 | 1275.61 | -17.5458 | 3 R.YSSECEP( Splice@chr  | 2.94E-10 | 0.006369 |
| 29Nov2011 | 21440 | 1123.09 | 17.33367 | 2 R.TFDDVLY Splice@chr   | 7.02E-11 | 0.001837 |
| 29Nov2011 | 21444 | 980.05  | -22.3594 | 2 K.K+14.016 chrX@380\$  | 2.26E-11 | 4.34E-04 |
| 29Nov2011 | 4009  | 876.41  | -8.50606 | 1 K.TEDEARR chrX@113\$   | 4.26E-11 | 0.001164 |
| 29Nov2011 | 8865  | 862.47  | 2.904885 | 1 _PIQDVYK Splice@chr    | 1.80E-10 | 0.004548 |
| 29Nov2011 | 17034 | 762.4   | 0.669255 | 3 _FYSM+15 chrX@998\$    | 2.99E-10 | 0.006369 |
| 29Nov2011 | 10786 | 1173.17 | -9.30319 | 3 K.PTMRTCC Splice@chr   | 5.71E-11 | 0.001558 |
| 29Nov2011 | 14263 | 719.39  | 28.86707 | 2 R.FTQAGSE Splice@chr   | 4.41E-13 | 3.54E-04 |
| 29Nov2011 | 24596 | 1129.08 | -6.57578 | 2 R.K+14.016 chr2@533\$  | 2.57E-10 | 0.005403 |
| 29Nov2011 | 2469  | 672.82  | -0.63596 | 2 _HQLTEAS Splice@chr    | 6.61E-13 | 3.54E-04 |
| 29Nov2011 | 12544 | 565.33  | 5.793462 | 2 R.RSALLCRI Splice@chr  | 7.53E-11 | 0.001837 |
| 29Nov2011 | 4870  | 1073.56 | 20.18419 | 2 L.KIDDFEII chr4@168\$  | 2.12E-10 | 0.004802 |
| 29Nov2011 | 23232 | 1287.65 | -26.8489 | 2 _CTAVSAS Splice@chr    | 2.02E-11 | 4.34E-04 |
| 29Nov2011 | 9220  | 870.57  | 10.89471 | 1 _TPLAKLAI Splice@chr   | 2.65E-10 | 0.005479 |
| 29Nov2011 | 19160 | 1324.67 | -1.75221 | 1 R.MFTPLFE Splice@chr   | 2.13E-10 | 0.004888 |
| 29Nov2011 | 19166 | 1325.68 | 3.275484 | 1 R.MFTPLFE Splice@chr   | 3.31E-12 | 3.54E-04 |

|           |       |         |          |                          |          |          |
|-----------|-------|---------|----------|--------------------------|----------|----------|
| 29Nov2011 | 15141 | 685.88  | 4.188613 | 2 K.IVPGGGA chrX@1570    | 3.75E-15 | 0        |
| 29Nov2011 | 22582 | 1027.6  | -14.245  | 2 I.KNELKSKA chrX@6127   | 2.65E-10 | 0.005479 |
| 29Nov2011 | 21514 | 1123.09 | 17.33367 | 2 R.TFDDVLY Splice@chr   | 5.58E-11 | 0.001461 |
| 29Nov2011 | 3825  | 717.38  | -29.5402 | 2 R.RYPVNAC chr4@6445    | 1.64E-10 | 0.0041   |
| 29Nov2011 | 21172 | 1123.08 | 8.408819 | 2 R.TFDDVLY Splice@chr   | 7.94E-12 | 3.54E-04 |
| 29Nov2011 | 16602 | 762.4   | 0.669255 | 3 _ .FYSM+15 chrX@9985   | 2.58E-10 | 0.005403 |
| 29Nov2011 | 2419  | 672.82  | -0.63596 | 2 _ .HQLTEAS Splice@chr  | 1.59E-10 | 0.003906 |
| 29Nov2011 | 12230 | 1335.08 | 1.28103  | 2 _ .IESSYDKE Splice@chr | 2.81E-16 | 0        |
| 29Nov2011 | 11828 | 943.58  | 7.64101  | 1 _ .SPLFVPKF chrX@4402  | 1.51E-10 | 0.00363  |
| 29Nov2011 | 8313  | 1064.59 | 7.411911 | 1 K.YLINGNEI chr1@8687   | 6.30E-11 | 0.001756 |
| 29Nov2011 | 3650  | 537.8   | -5.57144 | 2 K.DQGMLN chr5@2025     | 4.09E-10 | 0.009633 |
| 29Nov2011 | 23324 | 1287.65 | -26.8489 | 2 _ .CTAVSAS Splice@chr  | 2.45E-10 | 0.005312 |
| 29Nov2011 | 16728 | 761.62  | -1.82546 | 4 S.RTEDPNL Splice@chr   | 3.33E-11 | 5.34E-04 |
| 29Nov2011 | 13575 | 1289.21 | -12.1094 | 2 K.TKKQKKK chrX@6244    | 2.02E-10 | 0.004711 |
| 29Nov2011 | 21545 | 749.06  | 13.8508  | 3 R.TFDDVLY Splice@chr   | 1.21E-10 | 0.003189 |
| 29Nov2011 | 24243 | 1091.64 | 22.46434 | 1 R.RANNLFS chrX@3308    | 3.91E-10 | 0.009484 |
| 29Nov2011 | 8290  | 1063.59 | 10.56915 | 1 K.YLINGNEI chr1@8687   | 4.23E-10 | 0.009703 |
| 29Nov2011 | 15669 | 820.92  | -19.8754 | 2 _ .FTEITNEV Splice@chr | 3.16E-14 | 0        |
| 29Nov2011 | 19225 | 1325.68 | 3.275484 | 1 R.MFTPLFE Splice@chr   | 5.20E-11 | 0.001361 |
| 29Nov2011 | 4814  | 1073.56 | 20.18419 | 2 L.KIDDFEII chr4@1685   | 2.68E-10 | 0.005568 |
| 29Nov2011 | 12199 | 1335.58 | 0.02368  | 2 _ .IESSYDKE Splice@chr | 1.94E-16 | 0        |
| 29Nov2011 | 16749 | 1077.57 | -20.0495 | 2 V.K+14.016 chr4@1240   | 2.84E-11 | 4.34E-04 |
| 29Nov2011 | 3707  | 433.76  | 2.609238 | 2 _ .IVDLPGPI chr3@1104  | 1.61E-10 | 0.003906 |
| 29Nov2011 | 23193 | 1288.16 | -20.373  | 2 _ .CTAVSAS Splice@chr  | 3.48E-10 | 0.007499 |
| 29Nov2011 | 4259  | 741.39  | -17.2291 | 2 K.QKSNWH chr5@1225     | 2.67E-10 | 0.005568 |
| 29Nov2011 | 21569 | 1123.09 | 17.33367 | 2 R.TFDDVLY Splice@chr   | 3.97E-10 | 0.009562 |
| 29Nov2011 | 21570 | 1122.59 | 18.82926 | 2 R.TFDDVLY Splice@chr   | 2.95E-10 | 0.006369 |
| 29Nov2011 | 21385 | 1123.09 | 17.33367 | 2 R.TFDDVLY Splice@chr   | 1.14E-10 | 0.002996 |
| 29Nov2011 | 19736 | 665.37  | -26.6417 | 2 Q.INNK+14 Splice@chr   | 3.73E-10 | 0.008668 |
| 29Nov2011 | 16020 | 777.91  | 29.12834 | 2 C.TCLERYLE chrX@1535   | 1.54E-10 | 0.003818 |
| 29Nov2011 | 14312 | 719.39  | 28.86707 | 2 R.FTQAGSE Splice@chr   | 2.26E-13 | 1.51E-04 |
| 29Nov2011 | 24219 | 545.82  | 18.37321 | 2 R.RANNLFS chrX@3308    | 1.25E-10 | 0.003375 |
| 29Nov2011 | 3735  | 815.93  | -18.3219 | 2 K.KNKKGQI chr5@8214    | 1.59E-10 | 0.003906 |
| 29Nov2011 | 21400 | 1122.58 | 9.904408 | 2 R.TFDDVLY Splice@chr   | 6.89E-11 | 0.001837 |
| 29Nov2011 | 13626 | 1289.21 | -12.1094 | 2 K.TKKQKKK chrX@6244    | 2.37E-10 | 0.005238 |
| 29Nov2011 | 21209 | 1123.09 | 17.33367 | 2 R.TFDDVLY Splice@chr   | 1.21E-10 | 0.003189 |
| 29Nov2011 | 17466 | 1275.61 | -17.5458 | 3 R.YSSECPEI Splice@chr  | 4.08E-11 | 9.55E-04 |
| 29Nov2011 | 20236 | 1064.2  | -10.2401 | 3 K.SGDAGIV Splice@chr   | 2.99E-11 | 5.34E-04 |
| 29Nov2011 | 13902 | 833.46  | -21.6039 | 2 R.RRVK+14 chr2@2138    | 4.06E-11 | 9.55E-04 |
| 29Nov2011 | 23277 | 1288.16 | -20.373  | 2 _ .CTAVSAS Splice@chr  | 3.33E-10 | 0.007151 |
| 29Nov2011 | 1455  | 409.74  | -10.6768 | 2 K.MVITNLK Splice@chr   | 3.54E-10 | 0.007581 |
| 29Nov2011 | 22375 | 989.53  | -24.3686 | 2 N.FRLLVIFS chr1@1191   | 3.17E-10 | 0.006807 |
| 29Nov2011 | 4987  | 794.43  | -5.96418 | 2 R.TK+14.01 chr1@7238   | 7.33E-11 | 0.001837 |
| 29Nov2011 | 3958  | 876.41  | -8.50606 | 1 K.TEDEARR chrX@1138    | 4.26E-11 | 0.001164 |
| 29Nov2011 | 9034  | 870.57  | 10.89471 | 1 _ .TPLAKLAI Splice@chr | 1.47E-10 | 0.00363  |
| 29Nov2011 | 20339 | 1003.19 | 17.13413 | 3 R.CWNRRA Splice@chr    | 9.07E-11 | 0.002328 |
| 29Nov2011 | 7552  | 1025.62 | -1.90621 | 1 K.LGLGSGL chr5@4945    | 3.50E-12 | 3.54E-04 |

|           |       |         |          |                          |          |          |
|-----------|-------|---------|----------|--------------------------|----------|----------|
| 29Nov2011 | 16939 | 849.93  | 18.38221 | 2 Q.DSSYFVE Splice@chr   | 2.56E-13 | 2.98E-04 |
| 29Nov2011 | 9171  | 870.57  | 10.89471 | 1 _..TPLAKLAI Splice@chr | 2.82E-10 | 0.006108 |
| 29Nov2011 | 13106 | 1240.68 | -0.19694 | 1 R.TVVVPQ\ Splice@chr   | 4.05E-10 | 0.009633 |
| 29Nov2011 | 10845 | 1173.51 | -4.63363 | 3 K.PTMRTCC Splice@chr   | 5.59E-12 | 3.54E-04 |
| 29Nov2011 | 23231 | 1288.15 | -28.1526 | 2 _..CTAVSAS Splice@chr  | 5.98E-11 | 0.001657 |
| 29Nov2011 | 23366 | 895.5   | -26.2786 | 3 _..CGK+14.( chr2@1165  | 2.05E-11 | 4.34E-04 |
| 29Nov2011 | 5262  | 562.3   | 5.280571 | 2 K.SVNSMKI chr5@4245    | 3.73E-10 | 0.008668 |
| 29Nov2011 | 19171 | 662.84  | -0.09222 | 2 R.MFTPLFE Splice@chr   | 1.28E-11 | 4.34E-04 |
| 29Nov2011 | 1712  | 409.74  | -10.6768 | 2 K.MVITNLK Splice@chr   | 2.70E-10 | 0.005568 |
| 29Nov2011 | 17098 | 916.46  | 1.168576 | 2 G.TEVFGK+ chr1@2717    | 2.09E-10 | 0.004711 |
| 29Nov2011 | 8254  | 1064.59 | 7.411911 | 1 K.YLINGNEI chr1@8687   | 9.20E-11 | 0.002425 |
| 29Nov2011 | 1335  | 473.26  | -11.3086 | 2 R.SSARGQL Splice@chr   | 3.46E-10 | 0.007499 |
| 29Nov2011 | 20216 | 1385.75 | 14.42536 | 1 K.FQNFQAI chr2@2226    | 4.41E-10 | 0.009961 |
| 29Nov2011 | 21455 | 1263.6  | -8.48632 | 2 I.QFSCLLAI chr5@1735   | 4.11E-10 | 0.009703 |
| 29Nov2011 | 3165  | 833.47  | 7.710408 | 1 R.DMVQLV chrX@9811     | 3.54E-10 | 0.007581 |
| 29Nov2011 | 11078 | 1345.63 | -24.7692 | 2 _..QVREMH Splice@chr   | 1.14E-10 | 0.002996 |
| 29Nov2011 | 6458  | 985     | 25.53932 | 2 _..TLNVNGC Splice@chr  | 3.49E-11 | 5.34E-04 |
| 29Nov2011 | 16696 | 1077.57 | -20.0495 | 2 V.K+14.016 chr4@1240   | 4.17E-11 | 0.001059 |
| 29Nov2011 | 21538 | 1122.58 | 9.904408 | 2 R.TFDDVLY Splice@chr   | 3.62E-10 | 0.007762 |
| 29Nov2011 | 10136 | 1130.65 | 12.16972 | 1 R.ISLTNANI chr5@7795   | 5.52E-11 | 0.001461 |
| 29Nov2011 | 106   | 722.35  | 3.723    | 1 R.FQGGGEI chr1@2595    | 3.38E-10 | 0.007332 |
| 29Nov2011 | 4887  | 626.3   | -9.76097 | 2 R.LCESGAA Splice@chr   | 5.04E-16 | 0        |
| 29Nov2011 | 11181 | 1345.63 | -24.7692 | 2 _..QVREMH Splice@chr   | 3.14E-10 | 0.006717 |
| 29Nov2011 | 21481 | 1122.59 | 18.82926 | 2 R.TFDDVLY Splice@chr   | 1.85E-10 | 0.004548 |
| 29Nov2011 | 19213 | 1324.67 | -1.75221 | 1 R.MFTPLFE Splice@chr   | 1.98E-10 | 0.004711 |
| 29Nov2011 | 8560  | 870.57  | 10.89471 | 1 _..TPLAKLAI Splice@chr | 3.29E-10 | 0.008209 |
| 29Nov2011 | 15044 | 1010.5  | -1.99522 | 2 _..GHVFEES Splice@chr  | 9.45E-11 | 0.002074 |
| 29Nov2011 | 19975 | 1287.29 | 16.47055 | 3 R.TFDDVLY Splice@chr   | 9.36E-12 | 7.83E-04 |
| 29Nov2011 | 17949 | 662.84  | -0.09222 | 2 R.MFTPLFE Splice@chr   | 8.03E-11 | 0.001969 |
| 29Nov2011 | 1173  | 435.2   | 14.7798  | 2 K.SSSSNGS chr4@1361    | 2.49E-11 | 0.00146  |
| 29Nov2011 | 11379 | 1335.58 | 0.02368  | 2 _..IESSYDKE Splice@chr | 9.16E-16 | 0        |
| 29Nov2011 | 11383 | 1335.08 | 1.28103  | 2 _..IESSYDKE Splice@chr | 2.07E-16 | 0        |
| 29Nov2011 | 10323 | 1345.63 | -24.7692 | 2 _..QVREMH Splice@chr   | 8.36E-12 | 7.83E-04 |
| 29Nov2011 | 17893 | 662.84  | -0.09222 | 2 R.MFTPLFE Splice@chr   | 1.08E-10 | 0.002854 |
| 29Nov2011 | 6829  | 1025.62 | -1.90621 | 1 K.LGLGSGL chr5@4945    | 6.36E-12 | 7.83E-04 |
| 29Nov2011 | 8410  | 870.57  | 10.89471 | 1 _..TPLAKLAI Splice@chr | 1.55E-10 | 0.004224 |
| 29Nov2011 | 5400  | 738.36  | -28.1431 | 2 K.KSIFNSE chr3@1175    | 1.63E-10 | 0.004224 |
| 29Nov2011 | 4591  | 794.43  | -5.96418 | 2 R.TK+14.01 chr1@7238   | 9.58E-11 | 0.0023   |
| 29Nov2011 | 15535 | 1077.57 | -20.0495 | 2 V.K+14.016 chr4@1240   | 2.04E-11 | 0.00146  |
| 29Nov2011 | 6418  | 868.43  | 10.92162 | 1 K.SSSGSLSS chr2@1132   | 2.09E-10 | 0.005483 |
| 29Nov2011 | 13289 | 719.39  | 28.86707 | 2 R.FTQAGSE Splice@chr   | 1.05E-13 | 4.65E-04 |
| 29Nov2011 | 8510  | 870.57  | 10.89471 | 1 _..TPLAKLAI Splice@chr | 2.47E-10 | 0.0062   |
| 29Nov2011 | 19919 | 1123.09 | 17.33367 | 2 R.TFDDVLY Splice@chr   | 2.62E-10 | 0.006509 |
| 29Nov2011 | 2245  | 672.82  | -0.63596 | 2 _..HQLTEAS Splice@chr  | 4.44E-12 | 7.83E-04 |
| 29Nov2011 | 10377 | 1345.13 | -23.5213 | 2 _..QVREMH Splice@chr   | 2.22E-10 | 0.00558  |
| 29Nov2011 | 8461  | 870.57  | 10.89471 | 1 _..TPLAKLAI Splice@chr | 1.44E-10 | 0.003704 |
| 29Nov2011 | 15481 | 1077.57 | -20.0495 | 2 V.K+14.016 chr4@1240   | 1.72E-11 | 0.00146  |

|           |       |         |          |                          |          |          |
|-----------|-------|---------|----------|--------------------------|----------|----------|
| 29Nov2011 | 3306  | 830.42  | -5.08114 | 1 K.YVYG TAR Splice@chr  | 2.83E-10 | 0.007335 |
| 29Nov2011 | 19892 | 957.5   | 1.956888 | 3 R.FIEPIEDIF Splice@chr | 3.59E-10 | 0.009544 |
| 29Nov2011 | 15272 | 1034.57 | -2.45085 | 2 K.FK+14.01 Splice@chr  | 8.45E-12 | 7.83E-04 |
| 29Nov2011 | 20045 | 1122.59 | 18.82926 | 2 R.TFDDVLY Splice@chr   | 1.79E-10 | 0.004541 |
| 29Nov2011 | 12186 | 1240.68 | -0.19694 | 1 R.TVVVPQ\ Splice@chr   | 2.14E-10 | 0.005483 |
| 29Nov2011 | 19948 | 980.06  | -12.1303 | 2 K.K+14.016 chrX@3807   | 1.47E-10 | 0.003704 |
| 29Nov2011 | 19943 | 1287.3  | 24.25464 | 3 R.TFDDVLY Splice@chr   | 2.29E-11 | 0.00146  |
| 29Nov2011 | 4804  | 816.93  | -8.79362 | 2 F.FHFRNAS chr4@9404    | 2.65E-10 | 0.006607 |
| 29Nov2011 | 9009  | 625.82  | -20.2839 | 2 R.K+14.016 chrX@1356   | 2.13E-10 | 0.005483 |
| 29Nov2011 | 21383 | 1287.66 | -19.0694 | 2 _CTAVSAS Splice@chr    | 3.39E-11 | 0.00146  |
| 29Nov2011 | 12506 | 893.92  | 26.65922 | 2 _FSDDDVT Splice@chr    | 2.59E-10 | 0.006407 |
| 29Nov2011 | 15245 | 620.36  | -19.2163 | 2 K.KMLISNH Splice@chr   | 2.34E-11 | 0.00146  |
| 29Nov2011 | 16288 | 1275.61 | -17.5458 | 3 R.YSSECPE( Splice@chr  | 1.76E-10 | 0.004442 |
| 29Nov2011 | 15129 | 1092.05 | -25.1559 | 2 K.VQYLMAI chr5@2035    | 2.20E-10 | 0.005483 |
| 29Nov2011 | 6984  | 1025.62 | -1.90621 | 1 K.LGLG SGL chr5@4945   | 2.31E-11 | 0.00146  |
| 29Nov2011 | 19937 | 1122.59 | 18.82926 | 2 R.TFDDVLY Splice@chr   | 1.64E-10 | 0.004224 |
| 29Nov2011 | 22726 | 569.98  | -2.21696 | 3 K.LLEDVEV' chr2@2845   | 1.11E-10 | 0.00306  |
| 29Nov2011 | 16897 | 910.99  | -12.6489 | 2 Y.FKNIDKD Splice@chr   | 6.93E-11 | 0.001749 |
| 29Nov2011 | 17923 | 1324.67 | -1.75221 | 1 R.MFTPLFE Splice@chr   | 3.72E-13 | 4.65E-04 |
| 29Nov2011 | 10041 | 1173.17 | -9.30319 | 3 K.PTMRTCC Splice@chr   | 3.99E-11 | 0.001566 |
| 29Nov2011 | 14812 | 990.5   | -11.7554 | 2 F.RLSESELE chr4@7515   | 3.24E-10 | 0.008009 |
| 29Nov2011 | 16340 | 1275.61 | -17.5458 | 3 R.YSSECPE( Splice@chr  | 6.50E-11 | 0.001749 |
| 29Nov2011 | 2372  | 934.47  | 6.996328 | 1 _EYQPELR Splice@chr    | 3.61E-10 | 0.009544 |
| 29Nov2011 | 10245 | 1345.63 | -24.7692 | 2 _QVREMH Splice@chr     | 4.96E-11 | 0.001749 |
| 29Nov2011 | 21364 | 1288.16 | -20.373  | 2 _CTAVSAS Splice@chr    | 4.15E-11 | 0.001566 |
| 29Nov2011 | 9605  | 499.28  | 5.144758 | 2 _VYNIYVAI chrX@1610    | 3.16E-10 | 0.008009 |
| 29Nov2011 | 14871 | 799.9   | -18.6412 | 2 K.FKNVQFY chr2@1232    | 9.57E-11 | 0.0023   |
| 29Nov2011 | 16394 | 1275.61 | -17.5458 | 3 R.YSSECPE( Splice@chr  | 4.36E-11 | 0.001566 |
| 29Nov2011 | 429   | 473.26  | -11.3086 | 2 R.SSARGQL Splice@chr   | 3.42E-10 | 0.008827 |
| 29Nov2011 | 3729  | 951.5   | -27.6756 | 1 R.KTAIESFR Splice@chr  | 1.61E-10 | 0.004224 |
| 29Nov2011 | 12133 | 1240.68 | -0.19694 | 1 R.TVVVPQ\ Splice@chr   | 4.32E-11 | 0.001566 |
| 29Nov2011 | 8610  | 870.57  | 10.89471 | 1 _TPLAKLAI Splice@chr   | 2.67E-10 | 0.006607 |
| 29Nov2011 | 21414 | 1288.15 | -28.1526 | 2 _CTAVSAS Splice@chr    | 1.86E-11 | 0.00146  |
| 29Nov2011 | 14045 | 531.27  | 16.65195 | 3 K.VCIEFEFP chrX@1228   | 3.05E-10 | 0.007822 |
| 29Nov2011 | 11809 | 671.87  | -26.5383 | 2 T.FNIVHTQ Splice@chr   | 1.32E-10 | 0.0036   |
| 29Nov2011 | 314   | 726.38  | -29.0286 | 1 K.SAGKAHF chr5@1557    | 1.46E-10 | 0.003704 |
| 29Nov2011 | 22394 | 545.82  | 18.37321 | 2 R.RANNLFS chrX@3308    | 4.96E-11 | 0.001749 |
| 29Nov2011 | 105   | 722.35  | 3.723    | 1 R.FQGGGEI chr1@2595    | 3.33E-10 | 0.008315 |
| 29Nov2011 | 11325 | 1335.08 | 1.28103  | 2 _IESSYDKE Splice@chr   | 7.59E-15 | 0        |
| 29Nov2011 | 21449 | 1288.15 | -28.1526 | 2 _CTAVSAS Splice@chr    | 3.42E-14 | 3.72E-04 |
| 29Nov2011 | 2197  | 672.82  | -0.63596 | 2 _HQLTEAS Splice@chr    | 4.33E-12 | 7.83E-04 |
| 29Nov2011 | 3457  | 717.38  | -29.5402 | 2 R.RYPVNAC chr4@6445    | 2.26E-10 | 0.00558  |
| 29Nov2011 | 17877 | 1325.68 | 3.275484 | 1 R.MFTPLFE Splice@chr   | 9.15E-12 | 7.83E-04 |
| 29Nov2011 | 17870 | 1324.67 | -1.75221 | 1 R.MFTPLFE Splice@chr   | 2.02E-13 | 4.65E-04 |
| 29Nov2011 | 4474  | 794.43  | -5.96418 | 2 R.TK+14.01 chr1@7238   | 7.21E-11 | 0.001749 |
| 29Nov2011 | 19993 | 1123.09 | 17.33367 | 2 R.TFDDVLY Splice@chr   | 1.44E-10 | 0.003704 |
| 29Nov2011 | 4530  | 794.43  | -5.96418 | 2 R.TK+14.01 chr1@7238   | 3.51E-11 | 0.00146  |

|           |       |         |          |                          |          |          |
|-----------|-------|---------|----------|--------------------------|----------|----------|
| 29Nov2011 | 23467 | 1138.62 | -11.8655 | 1 K.KSEMK+1 chr2@1477    | 1.55E-10 | 0.004224 |
| 29Nov2011 | 17933 | 1325.68 | 3.275484 | 1 R.MFTPLFE Splice@chr   | 4.97E-13 | 4.65E-04 |
| 29Nov2011 | 11313 | 1335.58 | 0.02368  | 2 _ .IESSYDKE Splice@chr | 3.63E-17 | 0        |
| 29Nov2011 | 2300  | 672.82  | -0.63596 | 2 _ .HQLTEAS Splice@chr  | 5.27E-12 | 7.83E-04 |
| 29Nov2011 | 2145  | 672.82  | -0.63596 | 2 _ .HQLTEAS Splice@chr  | 1.03E-11 | 9.13E-04 |
| 29Nov2011 | 16740 | 835.45  | -7.2977  | 4 R.K+14.016 chrX@9996   | 2.25E-10 | 0.00558  |
| 29Nov2011 | 3064  | 876.41  | -8.50606 | 1 K.TEDEARR chrX@1138    | 4.26E-11 | 0.001993 |
| 29Nov2011 | 10952 | 1240.68 | -0.19694 | 1 R.TVVVPQ\ Splice@chr   | 7.09E-11 | 0.002585 |
| 29Nov2011 | 18362 | 1122.58 | 9.904408 | 2 R.TFDDVLY Splice@chr   | 4.25E-11 | 0.001993 |
| 29Nov2011 | 12031 | 719.39  | 28.86707 | 2 R.FTQAGSE Splice@chr   | 7.32E-14 | 0        |
| 29Nov2011 | 14239 | 1077.57 | -20.0495 | 2 V.K+14.016 chr4@1240   | 2.62E-11 | 0.001463 |
| 29Nov2011 | 20285 | 738.43  | 2.427875 | 3 K.M+15.99 chrX@2946    | 7.29E-11 | 0.002585 |
| 29Nov2011 | 10154 | 1335.08 | 1.28103  | 2 _ .IESSYDKE Splice@chr | 5.02E-16 | 0        |
| 29Nov2011 | 14998 | 1275.61 | -17.5458 | 3 R.YSSECPE\ Splice@chr  | 5.09E-11 | 0.00211  |
| 29Nov2011 | 16907 | 640.58  | 12.53126 | 4 _ .VAM+15. chr1@1002   | 1.56E-10 | 0.003923 |
| 29Nov2011 | 5415  | 985     | 25.53932 | 2 _ .TLNVNGC Splice@chr  | 1.81E-11 | 0.001338 |
| 29Nov2011 | 6147  | 1025.62 | -1.90621 | 1 K.LGLGSGL chr5@4945    | 2.42E-12 | 1.69E-04 |
| 29Nov2011 | 18208 | 1123.09 | 17.33367 | 2 R.TFDDVLY Splice@chr   | 1.94E-10 | 0.004759 |
| 29Nov2011 | 8007  | 625.82  | -20.2839 | 2 R.K+14.016 chrX@1356   | 7.12E-11 | 0.002585 |
| 29Nov2011 | 16441 | 1325.68 | 3.275484 | 1 R.MFTPLFE Splice@chr   | 3.07E-13 | 0        |
| 29Nov2011 | 19800 | 1288.16 | -20.373  | 2 _ .CTAVSAS Splice@chr  | 3.34E-11 | 0.001872 |
| 29Nov2011 | 16269 | 1216.59 | -11.6275 | 2 L.RNTRND\ chr4@1012    | 2.93E-11 | 0.001743 |
| 29Nov2011 | 113   | 845.45  | 2.312923 | 1 K.KPTADAS chr3@9621    | 1.53E-10 | 0.003665 |
| 29Nov2011 | 14176 | 1077.57 | -20.0495 | 2 V.K+14.016 chr4@1240   | 5.51E-11 | 0.002241 |
| 29Nov2011 | 9235  | 1345.63 | -24.7692 | 2 _ .QVREMH Splice@chr   | 1.93E-10 | 0.004635 |
| 29Nov2011 | 2771  | 433.76  | 2.609238 | 2 _ .IVDLP GPI chr3@1104 | 1.32E-10 | 0.003422 |
| 29Nov2011 | 1234  | 409.74  | -10.6768 | 2 K.MVITNLK Splice@chr   | 2.70E-10 | 0.007049 |
| 29Nov2011 | 9288  | 1345.63 | -24.7692 | 2 _ .QVREMH Splice@chr   | 2.20E-10 | 0.005749 |
| 29Nov2011 | 9010  | 1173.17 | -9.30319 | 3 K.PTMRTCC Splice@chr   | 9.10E-11 | 0.002817 |
| 29Nov2011 | 11709 | 833.46  | -21.6039 | 2 R.RRVK+14 chr2@2138    | 1.44E-10 | 0.003422 |
| 29Nov2011 | 9249  | 897.42  | -27.6753 | 3 _ .QVREMH Splice@chr   | 1.96E-10 | 0.004885 |
| 29Nov2011 | 5734  | 868.43  | 10.92162 | 1 K.SSSGSLSS chr2@1132   | 1.65E-10 | 0.004146 |
| 29Nov2011 | 1599  | 672.82  | -0.63596 | 2 _ .HQLTEAS Splice@chr  | 2.44E-10 | 0.006332 |
| 29Nov2011 | 10208 | 1335.58 | 0.02368  | 2 _ .IESSYDKE Splice@chr | 9.12E-15 | 0        |
| 29Nov2011 | 19834 | 1288.16 | -20.373  | 2 _ .CTAVSAS Splice@chr  | 8.10E-12 | 4.68E-04 |
| 29Nov2011 | 3444  | 717.38  | -29.5402 | 2 R.RYPVNAC chr4@6445    | 9.44E-11 | 0.002817 |
| 29Nov2011 | 3992  | 794.43  | -5.96418 | 2 R.TK+14.01 chr1@7238   | 1.06E-10 | 0.002817 |
| 29Nov2011 | 7632  | 745.37  | 4.509832 | 1 R.SSPMAPF chr4@1049    | 7.32E-11 | 0.002585 |
| 29Nov2011 | 19039 | 1055.54 | -8.72034 | 3 K.SGTIFDNI Splice@chr  | 6.15E-11 | 0.00249  |
| 29Nov2011 | 10211 | 1335.08 | 1.28103  | 2 _ .IESSYDKE Splice@chr | 4.93E-16 | 0        |
| 29Nov2011 | 10147 | 1335.58 | 0.02368  | 2 _ .IESSYDKE Splice@chr | 9.86E-16 | 0        |
| 29Nov2011 | 18389 | 1123.09 | 17.33367 | 2 R.TFDDVLY Splice@chr   | 3.52E-11 | 0.001872 |
| 29Nov2011 | 1665  | 672.82  | -0.63596 | 2 _ .HQLTEAS Splice@chr  | 6.89E-11 | 0.00249  |
| 29Nov2011 | 3938  | 794.43  | -5.96418 | 2 R.TK+14.01 chr1@7238   | 2.46E-11 | 0.001463 |
| 29Nov2011 | 6094  | 1025.62 | -1.90621 | 1 K.LGLGSGL chr5@4945    | 6.03E-12 | 3.18E-04 |
| 29Nov2011 | 19959 | 961.52  | -25.1629 | 2 R.HNIWKIR chr2@6350    | 4.66E-11 | 0.00211  |
| 29Nov2011 | 9957  | 943.58  | 7.64101  | 1 _ .SPLFVPKF chrX@4402  | 1.30E-10 | 0.003422 |

|           |       |         |          |                         |          |          |
|-----------|-------|---------|----------|-------------------------|----------|----------|
| 29Nov2011 | 18501 | 1123.09 | 17.33367 | 2 R.TFDDVLY Splice@chr  | 3.52E-10 | 0.00902  |
| 29Nov2011 | 18502 | 1122.58 | 9.904408 | 2 R.TFDDVLY Splice@chr  | 1.66E-10 | 0.004146 |
| 29Nov2011 | 9254  | 673.32  | -23.1345 | 4 _QVREMH Splice@chr    | 6.17E-11 | 0.00249  |
| 29Nov2011 | 11395 | 1289.21 | -12.1094 | 2 K.TKKQKKK chrX@624    | 9.51E-11 | 0.002817 |
| 29Nov2011 | 18418 | 1122.58 | 9.904408 | 2 R.TFDDVLY Splice@chr  | 1.18E-10 | 0.003058 |
| 29Nov2011 | 16456 | 662.84  | -0.09222 | 2 R.MFTPLFE Splice@chr  | 1.44E-10 | 0.003422 |
| 29Nov2011 | 3949  | 1073.56 | 20.18419 | 2 L.KIDDFEII chr4@168   | 1.38E-10 | 0.003422 |
| 29Nov2011 | 14016 | 1034.57 | -2.45085 | 2 K.FK+14.01 Splice@chr | 1.27E-11 | 9.21E-04 |
| 29Nov2011 | 13785 | 1092.06 | -15.9774 | 2 K.VQYLMAI chr5@203    | 2.34E-10 | 0.00611  |
| 29Nov2011 | 9899  | 943.58  | 7.64101  | 1 _SPLFVPKf chrX@440    | 1.30E-10 | 0.003422 |
| 29Nov2011 | 3884  | 794.43  | -5.96418 | 2 R.TK+14.01 chr1@723   | 1.35E-11 | 0.001213 |
| 29Nov2011 | 16431 | 1324.67 | -1.75221 | 1 R.MFTPLFE Splice@chr  | 1.78E-11 | 0.001338 |
| 29Nov2011 | 2862  | 433.76  | 2.609238 | 2 _IVDLPGPI chr3@110    | 1.06E-10 | 0.002817 |
| 29Nov2011 | 3352  | 741.89  | -19.4947 | 2 K.QKSNWH chr5@122     | 5.45E-11 | 0.002241 |
| 29Nov2011 | 2942  | 717.38  | -29.5402 | 2 R.RYPVNAC chr4@644    | 1.83E-10 | 0.004394 |
| 29Nov2011 | 14873 | 1275.61 | -17.5458 | 3 R.YSSECPE Splice@chr  | 1.62E-11 | 0.001213 |
| 29Nov2011 | 17367 | 1063.87 | -6.04876 | 3 K.SGDAGIV Splice@chr  | 2.41E-10 | 0.006228 |
| 29Nov2011 | 16385 | 1325.69 | 10.74542 | 1 R.MFTPLFE Splice@chr  | 2.83E-12 | 1.69E-04 |
| 29Nov2011 | 19801 | 1287.66 | -19.0694 | 2 _CTAVSAS Splice@chr   | 1.07E-10 | 0.002817 |
| 29Nov2011 | 19772 | 1288.15 | -28.1526 | 2 _CTAVSAS Splice@chr   | 1.91E-11 | 0.001338 |
| 29Nov2011 | 6206  | 566.31  | 21.45326 | 2 R.EVAQLEC chr5@170    | 2.24E-11 | 4.25E-04 |
| 29Nov2011 | 3523  | 447.25  | -0.40838 | 2 R.IFSAGELF chr3@560   | 1.87E-10 | 0.003255 |
| 29Nov2011 | 11851 | 1049.53 | 15.08228 | 3 G.DQSVDSI chr4@916    | 1.53E-10 | 0.002635 |
| 29Nov2011 | 6960  | 1050.99 | 9.800655 | 2 R.SYLLKNEI Splice@chr | 1.19E-10 | 0.001604 |
| 29Nov2011 | 7371  | 625.82  | -20.2839 | 2 R.K+14.016 chrX@135   | 4.41E-10 | 0.009321 |
| 29Nov2011 | 2699  | 717.38  | -29.5402 | 2 R.RYPVNAC chr4@644    | 5.98E-11 | 8.37E-04 |
| 29Nov2011 | 7319  | 625.82  | -20.2839 | 2 R.K+14.016 chrX@135   | 8.04E-11 | 0.001235 |
| 29Nov2011 | 14183 | 1108.93 | -3.30537 | 3 F.PETHVLA chr5@649    | 4.65E-11 | 5.67E-04 |
| 29Nov2011 | 3629  | 1073.56 | 20.18419 | 2 L.KIDDFEII chr4@168   | 3.07E-10 | 0.005703 |
| 29Nov2011 | 1601  | 463.3   | -2.70655 | 2 K.LTVIARPF chr3@137   | 4.30E-10 | 0.009078 |
| 29Nov2011 | 17687 | 1288.16 | -20.373  | 2 _CTAVSAS Splice@chr   | 4.68E-11 | 5.67E-04 |
| 29Nov2011 | 17688 | 1287.66 | -19.0694 | 2 _CTAVSAS Splice@chr   | 9.64E-11 | 0.001486 |
| 29Nov2011 | 6954  | 870.57  | 10.89471 | 1 _TPLAKLAI Splice@chr  | 2.39E-10 | 0.004486 |
| 29Nov2011 | 11132 | 719.39  | 28.86707 | 2 R.FTQAGSE Splice@chr  | 2.16E-13 | 0        |
| 29Nov2011 | 17110 | 791.9   | -17.5179 | 4 K.SGTIFDNI Splice@chr | 1.64E-14 | 0        |
| 29Nov2011 | 13045 | 1077.07 | -18.4907 | 2 V.K+14.016 chr4@124   | 1.54E-11 | 4.25E-04 |
| 29Nov2011 | 10091 | 861.98  | -14.4333 | 2 R.KTNLINIC chr4@445   | 3.55E-10 | 0.006781 |
| 29Nov2011 | 12454 | 1090.54 | -8.93818 | 2 K.INGVTVA chr3@629    | 1.27E-10 | 0.002125 |
| 29Nov2011 | 3421  | 541.8   | -25.5845 | 2 K.RCLHALR Splice@chr  | 2.06E-10 | 0.003757 |
| 29Nov2011 | 1175  | 560.8   | -5.07258 | 2 R.SSMVGR chrX@173     | 2.77E-11 | 4.25E-04 |
| 29Nov2011 | 13286 | 858.46  | -3.52431 | 2 R.RM+15.9 chr1@119    | 1.67E-10 | 0.003149 |
| 29Nov2011 | 1800  | 735.86  | -28.132  | 2 D.RFFATK+ chr2@577    | 2.16E-10 | 0.004007 |
| 29Nov2011 | 17133 | 792.15  | -18.5783 | 4 K.SGTIFDNI Splice@chr | 1.10E-13 | 0        |
| 29Nov2011 | 6150  | 566.31  | 21.45326 | 2 R.EVAQLEC chr5@170    | 2.10E-11 | 4.25E-04 |
| 29Nov2011 | 8437  | 1345.63 | -24.7692 | 2 _QVREMH Splice@chr    | 5.76E-11 | 8.37E-04 |
| 29Nov2011 | 3862  | 816.93  | -8.79362 | 2 F.FHFRNAS chr4@940    | 3.71E-10 | 0.007896 |
| 29Nov2011 | 1647  | 935.47  | 3.402383 | 1 _EYQPELR Splice@chr   | 3.86E-10 | 0.008375 |

|           |       |         |          |                         |          |          |
|-----------|-------|---------|----------|-------------------------|----------|----------|
| 29Nov2011 | 98    | 722.35  | 3.723    | 1 R.FQGGGEI chr1@2595   | 3.33E-10 | 0.006304 |
| 29Nov2011 | 17720 | 1287.65 | -26.8489 | 2 _CTAVSAS Splice@chr   | 1.04E-10 | 0.001486 |
| 29Nov2011 | 14889 | 1216.59 | -11.6275 | 2 L.RNTRNDI chr4@1012   | 4.06E-11 | 4.25E-04 |
| 29Nov2011 | 9198  | 618.83  | -6.67202 | 2 _QIMNNFI Splice@chr   | 2.74E-11 | 4.25E-04 |
| 29Nov2011 | 5608  | 1025.62 | -1.90621 | 1 K.LGLGSGL chr5@4945   | 4.14E-12 | 4.25E-04 |
| 29Nov2011 | 8497  | 1345.63 | -24.7692 | 2 _QVREMH Splice@chr    | 1.80E-10 | 0.003255 |
| 29Nov2011 | 16680 | 1122.58 | 9.904408 | 2 R.TFDDVLY Splice@chr  | 8.53E-11 | 0.001365 |
| 29Nov2011 | 10824 | 833.47  | -9.64586 | 2 R.RRVK+14 chr2@2138   | 6.35E-11 | 9.67E-04 |
| 29Nov2011 | 4533  | 518.01  | -14.4971 | 4 K.DLEKSSM Splice@chr  | 1.65E-11 | 4.25E-04 |
| 29Nov2011 | 8498  | 1345.13 | -23.5213 | 2 _QVREMH Splice@chr    | 2.56E-10 | 0.004734 |
| 29Nov2011 | 13082 | 1077.57 | -20.0495 | 2 V.K+14.016 chr4@1240  | 1.01E-10 | 0.001486 |
| 29Nov2011 | 2751  | 717.38  | -29.5402 | 2 R.RYPVNAC chr4@6445   | 3.55E-10 | 0.006781 |
| 29Nov2011 | 1220  | 560.8   | -5.07258 | 2 R.SSMVGR1 chrX@1738   | 1.64E-10 | 0.003021 |
| 29Nov2011 | 1026  | 439.74  | 18.7116  | 2 R.SIAMFGP chr2@4157   | 1.08E-10 | 0.001604 |
| 29Nov2011 | 5076  | 985     | 25.53932 | 2 _TLNVNGC Splice@chr   | 5.10E-12 | 4.25E-04 |
| 29Nov2011 | 13038 | 1077.57 | -20.0495 | 2 V.K+14.016 chr4@1240  | 1.83E-11 | 4.25E-04 |
| 29Nov2011 | 12443 | 799.9   | -18.6412 | 2 K.FKNVQFY chr2@1232   | 2.29E-10 | 0.004382 |
| 29Nov2011 | 6530  | 1086.02 | 18.22629 | 2 V.CLTEEGK Splice@chr  | 2.01E-10 | 0.003639 |
| 29Nov2011 | 16059 | 1003.19 | 17.13413 | 3 R.CWNRRA Splice@chr   | 9.68E-12 | 4.25E-04 |
| 29Nov2011 | 11028 | 752.37  | -29.649  | 2 R.AEEIEEK+ chr2@1375  | 2.50E-10 | 0.004611 |
| 29Nov2011 | 5640  | 1026.62 | -5.1804  | 1 K.LGLGSGL chr5@4945   | 5.66E-12 | 4.25E-04 |
| 29Nov2011 | 4781  | 474.25  | -28.3486 | 3 K.WMFSGP chr4@6312    | 4.93E-11 | 8.37E-04 |
| 29Nov2011 | 17719 | 1288.16 | -20.373  | 2 _CTAVSAS Splice@chr   | 2.22E-11 | 4.25E-04 |
| 29Nov2011 | 11117 | 947.99  | -25.0512 | 2 F.HLK+14.0 Splice@chr | 1.85E-10 | 0.003255 |
| 29Nov2011 | 7418  | 1034.52 | 26.89942 | 1 K.YNNHINN Splice@chr  | 4.65E-11 | 8.21E-04 |
| 29Nov2011 | 15366 | 1019.83 | -9.02599 | 3 R.QQSPENC Splice@chr  | 2.77E-10 | 0.006749 |
| 29Nov2011 | 5145  | 1141.59 | -5.77929 | 1 K.ENKPSRG Splice@chr  | 7.06E-11 | 0.001455 |
| 29Nov2011 | 5299  | 866.47  | -13.5535 | 1 R.TTAIGFG, chr1@1378  | 1.93E-10 | 0.004593 |
| 29Nov2011 | 1324  | 401.74  | 27.30093 | 2 R.IEAGGGC chr5@8776   | 9.97E-11 | 0.002379 |
| 29Nov2011 | 3584  | 794.43  | -5.96418 | 2 R.TK+14.01 chr1@7238  | 4.70E-11 | 8.21E-04 |
| 29Nov2011 | 1279  | 401.74  | 27.30093 | 2 R.IEAGGGC chr5@8776   | 2.49E-10 | 0.006339 |
| 29Nov2011 | 3639  | 794.43  | -5.96418 | 2 R.TK+14.01 chr1@7238  | 1.63E-11 | 3.45E-04 |
| 29Nov2011 | 8726  | 618.83  | -6.67202 | 2 _QIMNNFI Splice@chr   | 2.13E-11 | 3.45E-04 |
| 29Nov2011 | 3535  | 793.93  | -3.84873 | 2 R.TK+14.01 chr1@7238  | 1.54E-10 | 0.003544 |
| 29Nov2011 | 11740 | 990.5   | -11.7554 | 2 F.RLSESELE chr4@7519  | 1.49E-10 | 0.003415 |
| 29Nov2011 | 16962 | 528.21  | -26.1287 | 2 K.TCEESGA Splice@chr  | 3.97E-10 | 0.00987  |
| 29Nov2011 | 10240 | 1114.6  | 7.782975 | 2 S.LYYSSCPL chrX@1175  | 3.28E-10 | 0.008024 |
| 29Nov2011 | 648   | 444.25  | -3.23598 | 2 R.AELSSRPI chr3@8104  | 9.85E-11 | 0.002379 |
| 29Nov2011 | 5841  | 871.03  | 10.03674 | 3 R.KCDQCEI chr4@5179   | 7.17E-18 | 0        |
| 29Nov2011 | 965   | 580.82  | 9.010066 | 2 K.ENRATTS chrX@1975   | 1.68E-12 | 0        |
| 29Nov2011 | 9559  | 538.3   | 24.46197 | 3 K.TFEISTRA Splice@chr | 1.01E-10 | 0.002677 |
| 29Nov2011 | 4552  | 518.01  | -14.4971 | 4 K.DLEKSSM Splice@chr  | 1.14E-10 | 0.002677 |
| 29Nov2011 | 3427  | 541.8   | -25.5845 | 2 K.RCLHALR Splice@chr  | 1.87E-10 | 0.004593 |
| 29Nov2011 | 73    | 479.79  | -15.6161 | 2 _KMVSPRI chr1@1106    | 7.54E-11 | 0.001772 |
| 29Nov2011 | 1049  | 580.82  | 9.010066 | 2 K.ENRATTS chrX@1975   | 2.07E-10 | 0.004729 |
| 29Nov2011 | 2624  | 815.93  | -18.3219 | 2 K.KNKKGQI chr5@8214   | 1.29E-10 | 0.003123 |
| 29Nov2011 | 1806  | 1059.54 | -17.6437 | 1 _YDHKNAI chr5@1738    | 3.21E-10 | 0.007738 |

|           |       |         |          |                         |          |          |
|-----------|-------|---------|----------|-------------------------|----------|----------|
| 29Nov2011 | 3232  | 814.86  | 7.993318 | 2 R.SSAGGW chrX@174     | 1.14E-10 | 0.002677 |
| 29Nov2011 | 5373  | 1025.62 | -1.90621 | 1 K.LGLGSGL chr5@494    | 8.34E-11 | 0.001922 |
| 29Nov2011 | 5158  | 1142.6  | 0.055393 | 1 K.ENKPSRG Splice@chr  | 6.97E-11 | 0.001455 |
| 29Nov2011 | 11608 | 820.92  | -19.8754 | 2 _FTEITNEV Splice@chr  | 1.65E-11 | 3.45E-04 |
| 29Nov2011 | 4653  | 746.41  | -19.019  | 1 K.KAGGVD Splice@chr   | 3.01E-10 | 0.007321 |
| 29Nov2011 | 10408 | 752.37  | -29.649  | 2 R.AEEIEEK+ chr2@137   | 1.62E-10 | 0.003544 |
| 29Nov2011 | 15238 | 1003.19 | 17.13413 | 3 R.CWNRRA Splice@chr   | 1.27E-12 | 0        |
| 29Nov2011 | 15236 | 873.48  | 25.16572 | 2 R.SIFVDLEP Splice@chr | 2.63E-10 | 0.006612 |
| 29Nov2011 | 5933  | 566.31  | 21.45326 | 2 R.EVAQLEC chr5@170    | 1.63E-10 | 0.003544 |
| 29Nov2011 | 7271  | 765.38  | -12.3766 | 1 R.SPEHAPK chr5@429    | 6.91E-11 | 0.001455 |
| 29Nov2011 | 1078  | 464.27  | 6.324078 | 2 _LGTGVDF Splice@chr   | 1.47E-10 | 0.003415 |
| 29Nov2011 | 5891  | 566.31  | 21.45326 | 2 R.EVAQLEC chr5@170    | 5.45E-11 | 0.00114  |
| 29Nov2011 | 13764 | 1108.93 | -3.30537 | 3 F.PETHVLA chr5@649    | 9.53E-11 | 0.002224 |
| 29Nov2011 | 3112  | 741.39  | -17.2291 | 2 K.QKSNWH chr5@122     | 1.06E-11 | 1.76E-04 |
| 29Nov2011 | 6698  | 584.7   | 7.385785 | 5 _TVFYGDL chr4@556     | 1.27E-10 | 0.002975 |
| 29Nov2011 | 9756  | 711.85  | -2.70508 | 2 R.SLHTLFST Splice@chr | 2.47E-10 | 0.006197 |
| 29Nov2011 | 5422  | 1025.62 | -1.90621 | 1 K.LGLGSGL chr5@494    | 1.33E-11 | 1.76E-04 |
| 29Nov2011 | 15077 | 1003.53 | 22.67704 | 3 R.CWNRRA Splice@chr   | 8.05E-14 | 0        |
| 29Nov2011 | 5439  | 1026.62 | -5.1804  | 1 K.LGLGSGL chr5@494    | 2.89E-11 | 5.09E-04 |
| 29Nov2011 | 2034  | 411.55  | -26.8589 | 3 K.ALQM+1! chr3@112    | 1.77E-10 | 0.00441  |
| 29Nov2011 | 5062  | 1025.62 | -1.90621 | 1 K.LGLGSGL chr5@494    | 9.87E-12 | 3.75E-04 |
| 29Nov2011 | 16179 | 1055.87 | -13.022  | 3 K.SGTIFDNI Splice@chr | 2.27E-14 | 0        |
| 29Nov2011 | 16188 | 792.15  | -18.5783 | 4 K.SGTIFDNI Splice@chr | 3.46E-12 | 1.94E-04 |
| 29Nov2011 | 4679  | 507.3   | -7.17287 | 2 K.IVEIDVLG chr5@193   | 2.62E-10 | 0.006048 |
| 29Nov2011 | 16164 | 792.15  | -18.5783 | 4 K.SGTIFDNI Splice@chr | 3.01E-10 | 0.007535 |
| 29Nov2011 | 5968  | 1086.02 | 18.22629 | 2 V.CLTEEGK Splice@chr  | 3.26E-10 | 0.009023 |
| 29Nov2011 | 4890  | 1142.6  | 0.055393 | 1 K.ENKPSRG Splice@chr  | 4.23E-11 | 0.00137  |
| 29Nov2011 | 3268  | 794.43  | -5.96418 | 2 R.TK+14.01 chr1@723   | 5.27E-11 | 0.001838 |
| 29Nov2011 | 5132  | 1026.62 | -5.1804  | 1 K.LGLGSGL chr5@494    | 2.97E-10 | 0.007535 |
| 29Nov2011 | 1984  | 516.29  | -20.3315 | 2 R.EAVKVDI chr4@130    | 2.82E-10 | 0.007249 |
| 29Nov2011 | 2673  | 537.3   | 7.397674 | 2 K.IAENSVEI chr3@107   | 9.70E-11 | 0.002608 |
| 29Nov2011 | 4858  | 1141.6  | 2.996671 | 1 K.ENKPSRG Splice@chr  | 2.54E-11 | 0.001211 |
| 29Nov2011 | 2789  | 741.39  | -17.2291 | 2 K.QKSNWH chr5@122     | 5.97E-11 | 0.001838 |
| 29Nov2011 | 6922  | 974.02  | 12.35758 | 2 R.WICCWR chr1@365     | 4.27E-11 | 0.00137  |
| 29Nov2011 | 3136  | 541.8   | -25.5845 | 2 K.RCLHALR Splice@chr  | 2.77E-10 | 0.006948 |
| 29Nov2011 | 8339  | 618.83  | -6.67202 | 2 _QIMNNFI Splice@chr   | 2.79E-10 | 0.006948 |
| 29Nov2011 | 7734  | 1345.63 | -24.7692 | 2 _QVREMH Splice@chr    | 3.39E-10 | 0.009312 |
| 29Nov2011 | 5585  | 566.31  | 21.45326 | 2 R.EVAQLEC chr5@170    | 2.76E-11 | 0.001211 |
| 29Nov2011 | 1122  | 402.21  | -10.4312 | 2 K.ATAGAQI chr2@793    | 2.75E-10 | 0.006803 |
| 29Nov2011 | 4217  | 517.76  | -12.8742 | 4 K.DLEKSSM Splice@chr  | 1.36E-10 | 0.00337  |
| 29Nov2011 | 3378  | 794.43  | -5.96418 | 2 R.TK+14.01 chr1@723   | 7.47E-11 | 0.002149 |
| 29Nov2011 | 3216  | 793.93  | -3.84873 | 2 R.TK+14.01 chr1@723   | 1.21E-10 | 0.003061 |
| 29Nov2011 | 15322 | 1019.83 | -9.02599 | 3 R.QQSPENI Splice@chr  | 2.84E-10 | 0.007249 |
| 29Nov2011 | 15291 | 1019.83 | -9.02599 | 3 R.QQSPENI Splice@chr  | 2.21E-10 | 0.004841 |
| 29Nov2011 | 4904  | 1141.59 | -5.77929 | 1 K.ENKPSRG Splice@chr  | 9.60E-11 | 0.002608 |
| 29Nov2011 | 9635  | 584.7   | 7.385785 | 5 _TVFYGDL chr4@556     | 2.87E-10 | 0.007249 |
| 29Nov2011 | 14386 | 858.45  | -15.2049 | 2 R.RM+15.9 chr1@119    | 8.00E-12 | 3.75E-04 |

|           |       |         |          |                         |          |          |
|-----------|-------|---------|----------|-------------------------|----------|----------|
| 29Nov2011 | 3319  | 794.43  | -5.96418 | 2 R.TK+14.01 chr1@7238  | 2.68E-11 | 0.001211 |
| 29Nov2011 | 10296 | 985.48  | 4.684337 | 2 R.QNSYCTA Splice@chr  | 3.09E-10 | 0.007677 |
| 29Nov2011 | 5109  | 1025.62 | -1.90621 | 1 K.LGLGSGL chr5@4945   | 4.37E-11 | 0.001539 |
| 29Nov2011 | 12313 | 858.46  | -3.52431 | 2 R.RM+15.9 chr1@1195   | 1.50E-12 | 1.94E-04 |
| 29Nov2011 | 16233 | 1055.87 | -13.022  | 3 K.SGTIFDNI Splice@chr | 7.88E-11 | 0.002149 |
| 29Nov2011 | 7666  | 1345.63 | -24.7692 | 2 _QVREMH Splice@chr    | 2.19E-10 | 0.004841 |
| 29Nov2011 | 16214 | 791.9   | -17.5179 | 4 K.SGTIFDNI Splice@chr | 1.24E-11 | 5.46E-04 |
| 29Nov2011 | 114   | 823.42  | -23.1545 | 2 R.KYEEVRY Splice@chr  | 1.71E-13 | 0        |
| 29Nov2011 | 2308  | 889.47  | 7.762881 | 1 R.DAEKLGE chr2@2809   | 1.16E-10 | 0.004588 |
| 29Nov2011 | 3213  | 518.01  | -14.4971 | 4 K.DLEKSSM Splice@chr  | 9.25E-11 | 0.003955 |
| 29Nov2011 | 11358 | 832.2   | 18.72522 | 4 K.FFKDIMV chr3@4692   | 9.06E-11 | 0.003955 |
| 29Nov2011 | 4450  | 566.31  | 21.45326 | 2 R.EVAQLEC chr5@1706   | 7.30E-11 | 0.003309 |
| 29Nov2011 | 2428  | 626.3   | -9.76097 | 2 R.LCESGAA Splice@chr  | 8.93E-16 | 0        |
| 29Nov2011 | 11448 | 1231.98 | -3.48768 | 3 _KNYSFFPI chrX@8592   | 1.54E-10 | 0.006546 |
| 29Nov2011 | 6391  | 1345.63 | -24.7692 | 2 _QVREMH Splice@chr    | 5.36E-11 | 0.002157 |
| 29Nov2011 | 3899  | 866.47  | -13.5535 | 1 R.TTAIGFG, chr1@1378  | 3.44E-12 | 5.69E-04 |
| 29Nov2011 | 9642  | 820.93  | -7.66728 | 2 _FTEITNEV Splice@chr  | 1.91E-11 | 0.001494 |
| 29Nov2011 | 9645  | 826.44  | -27.4106 | 2 K.YQILQLM chr4@3120   | 1.16E-10 | 0.004588 |
| 29Nov2011 | 2769  | 816.93  | -8.79362 | 2 F.FHFRNAS chr4@9404   | 2.31E-10 | 0.00929  |
| 29Nov2011 | 2357  | 541.8   | -25.5845 | 2 K.RCLHALR Splice@chr  | 2.05E-10 | 0.008239 |
| 29Nov2011 | 8855  | 736.06  | 0.250192 | 3 K.NVLNVAI chrX@2592   | 3.11E-11 | 0.001494 |
| 29Nov2011 | 933   | 545.81  | -0.83904 | 2 K.FPVAAK+ chr3@1034   | 1.87E-10 | 0.007164 |
| 29Nov2011 | 1612  | 876.41  | -8.50606 | 1 K.TEDEARR chrX@1138   | 4.26E-11 | 0.003744 |
| 29Nov2011 | 11881 | 671.88  | -17.4676 | 4 R.YNFATKY chr5@6926   | 1.50E-10 | 0.005452 |
| 29Nov2011 | 5898  | 1345.63 | -24.7692 | 2 _QVREMH Splice@chr    | 1.49E-10 | 0.005452 |
| 29Nov2011 | 1252  | 411.55  | -26.8589 | 3 K.ALQM+1! chr3@1125   | 2.08E-10 | 0.009564 |
| 29Nov2011 | 8842  | 820.93  | -7.66728 | 2 _FTEITNEV Splice@chr  | 2.80E-11 | 0.002883 |
| 29Nov2011 | 2030  | 1076.56 | -11.4148 | 1 K.KGWNKE chr5@1027    | 7.27E-11 | 0.004475 |
| 29Nov2011 | 1576  | 876.41  | -8.50606 | 1 K.TEDEARR chrX@1138   | 4.26E-11 | 0.003744 |
| 29Nov2011 | 10251 | 791.9   | -15.2799 | 2 F.QFM+15. chr4@1546   | 1.65E-10 | 0.006555 |
| 29Nov2011 | 1533  | 717.38  | -29.5402 | 2 R.RYPVNAC chr4@6445   | 1.91E-10 | 0.008477 |
| 29Nov2011 | 2130  | 626.3   | -9.76097 | 2 R.LCESGAA Splice@chr  | 1.29E-14 | 0        |
| 29Nov2011 | 11463 | 858.45  | -15.2049 | 2 R.RM+15.9 chr1@1195   | 4.03E-12 | 0.001065 |
| 29Nov2011 | 3754  | 1026.62 | -5.1804  | 1 K.LGLGSGL chr5@4945   | 1.39E-10 | 0.005452 |
| 29Nov2011 | 11671 | 756.07  | -11.833  | 3 K.VFMVDN Splice@chr   | 1.24E-11 | 0.001657 |
| 29Nov2011 | 2195  | 794.43  | -5.96418 | 2 R.TK+14.01 chr1@7238  | 4.51E-11 | 0.004016 |
| 29Nov2011 | 738   | 545.81  | -0.83904 | 2 K.FPVAAK+ chr3@1034   | 1.12E-10 | 0.005255 |
| 29Nov2011 | 2256  | 794.43  | -5.96418 | 2 R.TK+14.01 chr1@7238  | 1.20E-10 | 0.005452 |
| 29Nov2011 | 4914  | 571.88  | -0.58667 | 2 K.KIMIAVV' chr5@5637  | 1.38E-10 | 0.005452 |
| 29Nov2011 | 12644 | 791.9   | -17.5179 | 4 K.SGTIFDNI Splice@chr | 6.21E-12 | 0.001065 |
| 29Nov2011 | 1499  | 717.38  | -29.5402 | 2 R.RYPVNAC chr4@6445   | 6.32E-11 | 0.00425  |
| 29Nov2011 | 4124  | 566.31  | 21.45326 | 2 R.EVAQLEC chr5@1706   | 3.80E-11 | 0.003161 |
| 29Nov2011 | 7706  | 1114.6  | 7.782975 | 2 S.LYSSCPEI chrX@1175  | 1.25E-11 | 0.001657 |
| 29Nov2011 | 16747 | 1275.61 | -17.5458 | 3 R.YSSECPEI Splice@chr | 8.11E-11 | 0.00128  |
| 29Nov2011 | 7827  | 566.31  | 21.45326 | 2 R.EVAQLEC chr5@1706   | 5.34E-11 | 9.90E-04 |
| 29Nov2011 | 10149 | 595.33  | 16.43181 | 3 R.DECYASK Splice@chr  | 5.74E-11 | 9.90E-04 |
| 29Nov2011 | 14378 | 855.41  | -22.1447 | 2 _HVQEVAI Splice@chr   | 4.48E-11 | 8.13E-04 |

|           |       |         |          |                          |          |          |
|-----------|-------|---------|----------|--------------------------|----------|----------|
| 29Nov2011 | 17500 | 988.04  | 8.32247  | 2 K.FDYFNMI chr4@160     | 9.72E-11 | 0.001561 |
| 29Nov2011 | 4319  | 741.39  | -17.2291 | 2 K.QKSNWH chr5@122      | 1.28E-10 | 0.002592 |
| 29Nov2011 | 16170 | 849.93  | 18.38221 | 2 Q.DSSYFVE Splice@chr   | 2.59E-12 | 1.20E-04 |
| 29Nov2011 | 14238 | 852.91  | 1.862793 | 2 R.FQMQRN chr1@122      | 4.72E-10 | 0.009682 |
| 29Nov2011 | 14850 | 858.48  | 6.006088 | 3 _LETGIKPI Splice@chr   | 3.31E-10 | 0.00638  |
| 29Nov2011 | 15476 | 515.3   | 13.29211 | 3 K.PNFTVILS chr4@164    | 2.48E-10 | 0.004639 |
| 29Nov2011 | 508   | 722.35  | 3.723    | 1 R.FQGGGEI chr1@259     | 3.33E-10 | 0.00638  |
| 29Nov2011 | 2158  | 560.8   | -5.07258 | 2 R.SSMVGR chrX@173      | 2.07E-10 | 0.003939 |
| 29Nov2011 | 4869  | 1073.56 | 20.18419 | 2 L.KIDDFEII chr4@168    | 2.87E-10 | 0.005607 |
| 29Nov2011 | 12531 | 1111.11 | -2.0893  | 2 R.LLM+15 chr4@328      | 3.25E-10 | 0.006203 |
| 29Nov2011 | 11564 | 657.04  | -26.9179 | 3 R.GNVRK+1 chrX@749     | 4.44E-10 | 0.009254 |
| 29Nov2011 | 3919  | 717.38  | -29.5402 | 2 R.RYPVNAC chr4@644     | 5.95E-11 | 9.90E-04 |
| 29Nov2011 | 8804  | 870.57  | 10.89471 | 1 _TPLAKLAI Splice@chr   | 3.96E-10 | 0.008397 |
| 29Nov2011 | 8801  | 1050.99 | 9.800655 | 2 R.SYLLKNEI Splice@chr  | 6.58E-11 | 9.90E-04 |
| 29Nov2011 | 21962 | 1288.15 | -28.1526 | 2 _CTAVSAS Splice@chr    | 3.91E-11 | 7.20E-04 |
| 29Nov2011 | 21963 | 1287.65 | -26.8489 | 2 _CTAVSAS Splice@chr    | 2.17E-10 | 0.004018 |
| 29Nov2011 | 3679  | 815.93  | -18.3219 | 2 K.KNKKGQI chr5@821     | 2.98E-10 | 0.005781 |
| 29Nov2011 | 20382 | 957.51  | 12.42199 | 3 R.FIEPIEDIF Splice@chr | 3.97E-10 | 0.008397 |
| 29Nov2011 | 15332 | 1090.54 | -8.93818 | 2 K.INGVTVA chr3@629     | 2.05E-10 | 0.003939 |
| 29Nov2011 | 21129 | 792.15  | -18.5783 | 4 K.SGTIFDNI Splice@chr  | 2.04E-15 | 0        |
| 29Nov2011 | 114   | 479.79  | -15.6161 | 2 _KMVSPRI chr1@110      | 1.63E-10 | 0.003035 |
| 29Nov2011 | 13332 | 833.46  | -21.6039 | 2 R.RRVK+14 chr2@213     | 4.57E-11 | 8.13E-04 |
| 29Nov2011 | 6209  | 746.41  | -19.019  | 1 K.KAGGVD Splice@chr    | 2.57E-10 | 0.004815 |
| 29Nov2011 | 15979 | 1077.07 | -18.4907 | 2 V.K+14.01 chr4@124     | 3.13E-11 | 7.20E-04 |
| 29Nov2011 | 4028  | 717.38  | -29.5402 | 2 R.RYPVNAC chr4@644     | 1.08E-10 | 0.002322 |
| 29Nov2011 | 7202  | 1025.62 | -1.90621 | 1 K.LGLGSGI chr5@494     | 1.81E-11 | 4.24E-04 |
| 29Nov2011 | 4793  | 446.75  | 3.354779 | 2 R.IFSAGELF chr3@560    | 1.87E-10 | 0.003676 |
| 29Nov2011 | 18176 | 1216.59 | -11.6275 | 2 L.RNTRNDI chr4@101     | 2.23E-10 | 0.0041   |
| 29Nov2011 | 6932  | 868.43  | 10.92162 | 1 K.SSSGSLSS chr2@113    | 2.89E-10 | 0.005781 |
| 29Nov2011 | 8858  | 870.57  | 10.89471 | 1 _TPLAKLAI Splice@chr   | 1.53E-10 | 0.00295  |
| 29Nov2011 | 11467 | 618.83  | -6.67202 | 2 _QIMNNFI Splice@chr    | 4.18E-10 | 0.008738 |
| 29Nov2011 | 2868  | 959.54  | 13.11736 | 1 K.KNVEEGK chr5@927     | 2.02E-10 | 0.003939 |
| 29Nov2011 | 4449  | 737.9   | 2.363663 | 2 K.VSWVAQ chr1@377      | 3.23E-10 | 0.006113 |
| 29Nov2011 | 11621 | 657.04  | -26.9179 | 3 R.GNVRK+1 chrX@749     | 4.17E-10 | 0.008738 |
| 29Nov2011 | 4076  | 717.38  | -29.5402 | 2 R.RYPVNAC chr4@644     | 9.57E-11 | 0.001561 |
| 29Nov2011 | 21196 | 791.9   | -17.5179 | 4 K.SGTIFDNI Splice@chr  | 4.64E-16 | 0        |
| 29Nov2011 | 10545 | 1345.63 | -24.7692 | 2 _QVREMH Splice@chr     | 5.03E-11 | 9.90E-04 |
| 29Nov2011 | 12786 | 759.89  | 5.916797 | 2 S.IDQLQLAI chr1@855    | 1.85E-10 | 0.003582 |
| 29Nov2011 | 18430 | 1324.68 | 5.809954 | 1 R.MFTPLFE Splice@chr   | 2.40E-13 | 1.20E-04 |
| 29Nov2011 | 3870  | 717.38  | -29.5402 | 2 R.RYPVNAC chr4@644     | 2.11E-10 | 0.004018 |
| 29Nov2011 | 15256 | 894     | -12.2343 | 2 _VETGIKPI Splice@chr   | 2.63E-11 | 5.25E-04 |
| 29Nov2011 | 18934 | 890.45  | 26.12723 | 2 K.GWSVPLI Splice@chr   | 9.30E-11 | 0.001561 |
| 29Nov2011 | 425   | 710.36  | -9.42683 | 2 R.NFFDK+1 chr4@107     | 1.35E-10 | 0.002769 |
| 29Nov2011 | 14992 | 820.92  | -19.8754 | 2 _FTEITNEV Splice@chr   | 1.00E-13 | 0        |
| 29Nov2011 | 9317  | 625.82  | -20.2839 | 2 R.K+14.01 chrX@135     | 2.99E-10 | 0.00586  |
| 29Nov2011 | 1856  | 439.74  | 18.7116  | 2 R.SIAMFGP chr2@415     | 8.54E-11 | 0.001372 |
| 29Nov2011 | 14544 | 1049.53 | 15.08228 | 3 G.DQSVDS chr4@916      | 1.04E-11 | 4.24E-04 |

|           |       |         |          |                          |          |          |
|-----------|-------|---------|----------|--------------------------|----------|----------|
| 29Nov2011 | 2603  | 1059.54 | -17.6437 | 1 _YDHKNAI chr5@1738     | 4.17E-10 | 0.008738 |
| 29Nov2011 | 3945  | 876.41  | -8.50606 | 1 K.TEDEARR chrX@1138    | 4.26E-11 | 8.13E-04 |
| 29Nov2011 | 10554 | 1345.13 | -23.5213 | 2 _QVREMH Splice@chr     | 1.76E-10 | 0.003306 |
| 29Nov2011 | 7886  | 566.31  | 21.45326 | 2 R.EVAQLEC chr5@1706    | 1.21E-10 | 0.002592 |
| 29Nov2011 | 8379  | 724.35  | 19.12636 | 3 V.CLTEEGK Splice@chr   | 2.06E-10 | 0.003939 |
| 29Nov2011 | 7260  | 1025.62 | -1.90621 | 1 K.LGLGSGL chr5@4945    | 6.64E-12 | 4.24E-04 |
| 29Nov2011 | 12134 | 671.37  | -24.0361 | 2 T.FNIVHTQ Splice@chr   | 1.60E-10 | 0.003035 |
| 29Nov2011 | 21924 | 1288.16 | -20.373  | 2 _CTAVSAS Splice@chr    | 9.13E-11 | 0.001469 |
| 29Nov2011 | 11454 | 944.58  | 4.081799 | 1 _SPLFVPKf chrX@4402    | 1.30E-10 | 0.002592 |
| 29Nov2011 | 3903  | 1043.59 | 28.92073 | 1 K.SSTHQSK chr5@2798    | 5.50E-11 | 9.90E-04 |
| 29Nov2011 | 13718 | 719.39  | 28.86707 | 2 R.FTQAGSE Splice@chr   | 7.37E-14 | 0        |
| 29Nov2011 | 5215  | 816.93  | -8.79362 | 2 F.FHFRNAS chr4@9404    | 1.88E-10 | 0.003763 |
| 29Nov2011 | 10606 | 1345.63 | -24.7692 | 2 _QVREMH Splice@chr     | 4.24E-11 | 8.13E-04 |
| 29Nov2011 | 9375  | 625.82  | -20.2839 | 2 R.K+14.016 chrX@1356   | 3.67E-10 | 0.007434 |
| 29Nov2011 | 16846 | 1275.61 | -17.5458 | 3 R.YSSECPEf Splice@chr  | 2.15E-11 | 4.24E-04 |
| 29Nov2011 | 9430  | 625.82  | -11.1921 | 2 I.QLEDIEFIS Splice@chr | 3.74E-10 | 0.007515 |
| 29Nov2011 | 13665 | 719.39  | 28.86707 | 2 R.FTQAGSE Splice@chr   | 9.84E-14 | 0        |
| 29Nov2011 | 8910  | 870.57  | 10.89471 | 1 _TPLAKLAI Splice@chr   | 2.48E-10 | 0.004639 |
| 29Nov2011 | 15245 | 894.5   | -14.1127 | 2 _VETGIKP Splice@chr    | 3.73E-12 | 2.32E-04 |
| 29Nov2011 | 15977 | 1077.57 | -20.0495 | 2 V.K+14.016 chr4@1240   | 1.85E-11 | 4.24E-04 |
| 29Nov2011 | 8360  | 1086.52 | 16.6803  | 2 V.CLTEEGK Splice@chr   | 6.80E-11 | 9.90E-04 |
| 29Nov2011 | 3590  | 717.38  | -29.5402 | 2 R.RYPVNAC chr4@6445    | 5.08E-11 | 0.001104 |
| 29Nov2011 | 15775 | 1275.6  | -25.4649 | 3 R.YSSECPEf Splice@chr  | 3.90E-11 | 7.50E-04 |
| 29Nov2011 | 17671 | 889.95  | -19.8868 | 2 K.RSSVHTE chr2@8442    | 2.79E-10 | 0.00628  |
| 29Nov2011 | 13326 | 855.41  | -22.1447 | 2 _HVQEVAI Splice@chr    | 3.32E-10 | 0.007613 |
| 29Nov2011 | 10576 | 472.29  | -0.64754 | 2 _SPLFVPKf chrX@4402    | 1.32E-10 | 0.002658 |
| 29Nov2011 | 11777 | 711.85  | -2.70508 | 2 R.SLHTLFST Splice@chr  | 1.48E-10 | 0.003447 |
| 29Nov2011 | 12393 | 833.46  | -21.6039 | 2 R.RRVK+14 chr2@2138    | 2.12E-10 | 0.004811 |
| 29Nov2011 | 10802 | 657.04  | -26.9179 | 3 R.GNVRK+1 chrX@7490    | 7.43E-11 | 0.002038 |
| 29Nov2011 | 7776  | 724.35  | 19.12636 | 3 V.CLTEEGK Splice@chr   | 4.68E-11 | 9.86E-04 |
| 29Nov2011 | 9782  | 1346.13 | -3.69865 | 2 _QVREMH Splice@chr     | 3.15E-10 | 0.006881 |
| 29Nov2011 | 8191  | 870.57  | 10.89471 | 1 _TPLAKLAI Splice@chr   | 1.23E-10 | 0.002658 |
| 29Nov2011 | 2603  | 735.86  | -28.132  | 2 D.RFFATK+ chr2@5778    | 3.07E-10 | 0.006678 |
| 29Nov2011 | 9737  | 1345.63 | -24.7692 | 2 _QVREMH Splice@chr     | 3.02E-11 | 3.80E-04 |
| 29Nov2011 | 6707  | 752.89  | -0.93272 | 2 R.GKCNGG chr4@5126     | 3.36E-10 | 0.007706 |
| 29Nov2011 | 20116 | 792.15  | -18.5783 | 4 K.SGTIFDNI Splice@chr  | 9.92E-14 | 0        |
| 29Nov2011 | 12695 | 719.39  | 28.86707 | 2 R.FTQAGSE Splice@chr   | 1.37E-13 | 0        |
| 29Nov2011 | 12339 | 833.46  | -21.6039 | 2 R.RRVK+14 chr2@2138    | 2.32E-10 | 0.005237 |
| 29Nov2011 | 1294  | 464.27  | 6.324078 | 2 _LGTGVDF Splice@chr    | 3.03E-10 | 0.00658  |
| 29Nov2011 | 4535  | 535.61  | -17.2487 | 3 K.QVLEKFN chr5@1221    | 2.43E-11 | 2.56E-04 |
| 29Nov2011 | 9791  | 1345.13 | -23.5213 | 2 _QVREMH Splice@chr     | 2.41E-11 | 2.56E-04 |
| 29Nov2011 | 20149 | 792.15  | -18.5783 | 4 K.SGTIFDNI Splice@chr  | 8.76E-14 | 0        |
| 29Nov2011 | 15095 | 849.93  | 18.38221 | 2 Q.DSSYFVE Splice@chr   | 1.68E-11 | 2.56E-04 |
| 29Nov2011 | 14714 | 1034.58 | 7.238552 | 2 K.FK+14.01 Splice@chr  | 9.23E-12 | 2.56E-04 |
| 29Nov2011 | 15873 | 1275.61 | -17.5458 | 3 R.YSSECPEf Splice@chr  | 2.99E-12 | 2.56E-04 |
| 29Nov2011 | 3644  | 717.38  | -29.5402 | 2 R.RYPVNAC chr4@6445    | 1.24E-10 | 0.002658 |
| 29Nov2011 | 14851 | 1077.07 | -18.4907 | 2 V.K+14.016 chr4@1240   | 6.44E-11 | 0.001694 |

|           |       |         |          |                         |          |          |
|-----------|-------|---------|----------|-------------------------|----------|----------|
| 29Nov2011 | 6833  | 1025.62 | -1.90621 | 1 K.LGLGSGI chr5@4945   | 3.14E-11 | 3.80E-04 |
| 29Nov2011 | 117   | 722.35  | 3.723    | 1 R.FQGGGEI chr1@2595   | 3.33E-10 | 0.007613 |
| 29Nov2011 | 19305 | 1123.09 | 17.33367 | 2 R.TFDDVLY Splice@chr  | 4.27E-10 | 0.009438 |
| 29Nov2011 | 8286  | 870.57  | 10.89471 | 1 _TPLAKLAI Splice@chr  | 1.28E-10 | 0.002658 |
| 29Nov2011 | 14136 | 990.5   | -11.7554 | 2 F.RLSESELE chr4@7515  | 2.31E-10 | 0.005237 |
| 29Nov2011 | 11402 | 671.37  | -24.0361 | 2 T.FNIVHTQ Splice@chr  | 2.90E-10 | 0.006485 |
| 29Nov2011 | 3894  | 717.38  | -29.5402 | 2 R.RYPVNAC chr4@6445   | 6.72E-11 | 0.001929 |
| 29Nov2011 | 15820 | 1275.61 | -17.5458 | 3 R.YSSECPEI Splice@chr | 7.21E-11 | 0.002038 |
| 29Nov2011 | 6724  | 1025.62 | -1.90621 | 1 K.LGLGSGI chr5@4945   | 2.42E-11 | 2.56E-04 |
| 29Nov2011 | 14274 | 1090.54 | -8.93818 | 2 K.INGVTVA chr3@6295   | 3.61E-10 | 0.008013 |
| 29Nov2011 | 7831  | 724.35  | 19.12636 | 3 V.CLTEEGK Splice@chr  | 7.72E-12 | 2.56E-04 |
| 29Nov2011 | 7830  | 1086.02 | 18.22629 | 2 V.CLTEEGK Splice@chr  | 1.06E-10 | 0.002658 |
| 29Nov2011 | 18702 | 1330.17 | 27.12755 | 2 F.YEEMDYI Splice@chr  | 6.97E-11 | 0.001929 |
| 29Nov2011 | 269   | 499.3   | -17.8989 | 2 R.RARDLLP Splice@chr  | 4.45E-10 | 0.009725 |
| 29Nov2011 | 105   | 479.79  | -15.6161 | 2 _KMOVSPRI chr1@1105   | 1.42E-10 | 0.003224 |
| 29Nov2011 | 15737 | 804.91  | 25.79416 | 2 _LTMTWN chr1@4515     | 2.71E-10 | 0.006178 |
| 29Nov2011 | 12590 | 752.37  | -29.649  | 2 R.AEEIEEK+ chr2@1375  | 1.94E-11 | 2.56E-04 |
| 29Nov2011 | 12750 | 719.39  | 28.86707 | 2 R.FTQAGSE Splice@chr  | 3.33E-14 | 0        |
| 29Nov2011 | 3197  | 445.73  | 5.764253 | 2 _DEIESAVI chr5@8265   | 1.27E-10 | 0.002658 |
| 29Nov2011 | 14178 | 894     | -12.2343 | 2 _VETGIKP Splice@chr   | 2.08E-11 | 2.56E-04 |
| 29Nov2011 | 3722  | 876.41  | -8.50606 | 1 K.TEDEARR chrX@1135   | 4.26E-11 | 8.69E-04 |
| 29Nov2011 | 3282  | 474.75  | 9.546346 | 2 K.NEKENSv chrX@6575   | 4.20E-10 | 0.009438 |
| 29Nov2011 | 1617  | 439.74  | 18.7116  | 2 R.SIAMFGP chr2@4155   | 1.72E-10 | 0.003977 |
| 29Nov2011 | 3389  | 948.48  | 18.96187 | 1 R.ENKENW Splice@chr   | 2.43E-10 | 0.005447 |
| 29Nov2011 | 2194  | 412.23  | 25.3069  | 2 R.IASYQGG chrX@1675   | 1.13E-10 | 0.002658 |
| 29Nov2011 | 15559 | 945.01  | -27.6072 | 2 Q.IRSISM+ chrX@8905   | 4.53E-10 | 0.009725 |
| 29Nov2011 | 7775  | 1086.02 | 18.22629 | 2 V.CLTEEGK Splice@chr  | 5.80E-11 | 0.001219 |
| 29Nov2011 | 10600 | 943.58  | 7.64101  | 1 _SPLFVPKI chrX@4405   | 1.30E-10 | 0.002658 |
| 29Nov2011 | 6773  | 1025.62 | -1.90621 | 1 K.LGLGSGI chr5@4945   | 5.72E-12 | 2.56E-04 |
| 29Nov2011 | 10657 | 943.58  | 7.576255 | 1 K.GSK+14.C chrX@1205  | 2.26E-10 | 0.005237 |
| 29Nov2011 | 14880 | 1077.57 | -20.0495 | 2 V.K+14.015 chr4@1240  | 6.67E-11 | 0.001929 |
| 29Nov2011 | 14882 | 1077.07 | -18.4907 | 2 V.K+14.015 chr4@1240  | 9.33E-11 | 0.002358 |
| 29Nov2011 | 14227 | 894     | -12.2343 | 2 _VETGIKP Splice@chr   | 4.60E-12 | 2.56E-04 |
| 29Nov2011 | 7347  | 566.31  | 21.45326 | 2 R.EVAQLEC chr5@1705   | 4.64E-11 | 9.86E-04 |
| 29Nov2011 | 19326 | 1122.59 | 18.82926 | 2 R.TFDDVLY Splice@chr  | 5.85E-11 | 0.001336 |
| 29Nov2011 | 20086 | 792.15  | -18.5783 | 4 K.SGTIFDNI Splice@chr | 5.07E-13 | 0        |
| 29Nov2011 | 3458  | 537.8   | -5.57144 | 2 K.DQGMLN chr5@2025    | 3.53E-10 | 0.008013 |
| 29Nov2011 | 1865  | 560.8   | -5.07258 | 2 R.SSMVGR chrX@1735    | 2.60E-10 | 0.006178 |
| 29Nov2011 | 20509 | 1288.15 | -28.1526 | 2 _CTAVSAS Splice@chr   | 6.35E-11 | 0.001575 |
| 29Nov2011 | 11904 | 894.42  | 24.78061 | 2 _FSDDDVT Splice@chr   | 2.81E-10 | 0.006384 |
| 29Nov2011 | 20184 | 792.15  | -18.5783 | 4 K.SGTIFDNI Splice@chr | 1.17E-14 | 0        |
| 29Nov2011 | 8266  | 1025.62 | -1.90621 | 1 K.LGLGSGI chr5@4945   | 3.63E-11 | 0.001201 |
| 29Nov2011 | 26556 | 545.82  | 18.37321 | 2 R.RANNLFS chrX@3305   | 3.18E-10 | 0.007709 |
| 29Nov2011 | 3224  | 735.86  | -28.132  | 2 D.RFFATK+ chr2@5775   | 6.09E-11 | 0.001892 |
| 29Nov2011 | 13257 | 1335.58 | 0.02368  | 2 _IESSYDKE Splice@chr  | 6.78E-15 | 1.68E-04 |
| 29Nov2011 | 14931 | 1289.21 | -12.1094 | 2 K.TKKQKKK chrX@6245   | 2.57E-10 | 0.006746 |
| 29Nov2011 | 10136 | 747.92  | 28.33609 | 2 R.SKWSTN chrX@8720    | 2.82E-10 | 0.007184 |

|           |       |         |          |                         |          |          |
|-----------|-------|---------|----------|-------------------------|----------|----------|
| 29Nov2011 | 4244  | 537.8   | -5.57144 | 2 K.DQGMLN chr5@2025    | 2.27E-10 | 0.006115 |
| 29Nov2011 | 25304 | 1288.15 | -28.1526 | 2 _CTAVSAS Splice@chr   | 1.12E-10 | 0.002963 |
| 29Nov2011 | 25305 | 1287.65 | -26.8489 | 2 _CTAVSAS Splice@chr   | 5.85E-11 | 0.001808 |
| 29Nov2011 | 7136  | 985     | 25.53932 | 2 _TLNVNGC Splice@chr   | 8.74E-12 | 4.95E-04 |
| 29Nov2011 | 19142 | 1275.61 | -17.5458 | 3 R.YSSECPEI Splice@chr | 2.66E-12 | 4.95E-04 |
| 29Nov2011 | 7254  | 985     | 25.53932 | 2 _TLNVNGC Splice@chr   | 7.56E-12 | 4.95E-04 |
| 29Nov2011 | 21029 | 662.84  | -0.09222 | 2 R.MFTPLFE Splice@chr  | 2.66E-10 | 0.006875 |
| 29Nov2011 | 4392  | 830.42  | -5.08114 | 1 K.YVYG TAR Splice@chr | 1.76E-10 | 0.004598 |
| 29Nov2011 | 2195  | 916.49  | -3.60177 | 1 K.QETTPAI chr5@3609   | 9.49E-11 | 0.002722 |
| 29Nov2011 | 3085  | 1059.54 | -17.6437 | 1 _YDHKNAI chr5@1738    | 4.56E-11 | 0.001374 |
| 29Nov2011 | 21062 | 1324.67 | -1.75221 | 1 R.MFTPLFE Splice@chr  | 5.64E-12 | 4.95E-04 |
| 29Nov2011 | 16632 | 685.88  | 4.188613 | 2 K.IVPGGGA chrX@1570   | 4.53E-19 | 0        |
| 29Nov2011 | 19999 | 988.05  | 18.46899 | 2 K.FDYFNMI chr4@1602   | 2.62E-10 | 0.006824 |
| 29Nov2011 | 5597  | 1073.56 | 20.18419 | 2 L.KIDDFEII chr4@1685  | 2.15E-10 | 0.005883 |
| 29Nov2011 | 23548 | 1123.09 | 17.33367 | 2 R.TFDDVLY Splice@chr  | 8.77E-11 | 0.002722 |
| 29Nov2011 | 2533  | 587.31  | 21.96598 | 2 Q.NAVEQE Splice@chr   | 3.52E-10 | 0.008564 |
| 29Nov2011 | 16473 | 531.27  | 16.65195 | 3 K.VCIEFEEP chrX@1228  | 2.78E-10 | 0.007035 |
| 29Nov2011 | 17706 | 1010.5  | -1.99522 | 2 _GHVFEES Splice@chr   | 4.23E-11 | 0.001286 |
| 29Nov2011 | 17705 | 1011    | -3.65684 | 2 _GHVFEES Splice@chr   | 3.05E-11 | 0.001123 |
| 29Nov2011 | 23843 | 911.97  | 3.283048 | 2 R.TMLELIN Splice@chr  | 2.44E-18 | 0        |
| 29Nov2011 | 3171  | 672.82  | -0.63596 | 2 _HQLTEAS Splice@chr   | 1.90E-11 | 6.70E-04 |
| 29Nov2011 | 4564  | 876.41  | -8.50606 | 1 K.TEDEARR chrX@1138   | 1.59E-10 | 0.004517 |
| 29Nov2011 | 4614  | 876.41  | -8.50606 | 1 K.TEDEARR chrX@1138   | 4.26E-11 | 0.001286 |
| 29Nov2011 | 24442 | 792.15  | -18.5783 | 4 K.SGTIFDNI Splice@chr | 9.70E-16 | 0        |
| 29Nov2011 | 21018 | 1325.68 | 3.275484 | 1 R.MFTPLFE Splice@chr  | 3.84E-12 | 4.95E-04 |
| 29Nov2011 | 13055 | 943.58  | 7.64101  | 1 _SPLFVPKI chrX@4402   | 3.77E-10 | 0.009272 |
| 29Nov2011 | 18326 | 1077.57 | -20.0495 | 2 V.K+14.016 chr4@1240  | 4.26E-11 | 0.001286 |
| 29Nov2011 | 10667 | 625.82  | -20.2839 | 2 R.K+14.016 chrX@1356  | 3.58E-10 | 0.008564 |
| 29Nov2011 | 23604 | 1122.59 | 18.82926 | 2 R.TFDDVLY Splice@chr  | 1.63E-10 | 0.004517 |
| 29Nov2011 | 15121 | 779.44  | 12.54541 | 1 R.LLSIGGG chr3@1550   | 3.58E-10 | 0.008564 |
| 29Nov2011 | 17444 | 990.5   | -11.7554 | 2 F.RLSESELE chr4@7519  | 1.40E-10 | 0.003962 |
| 29Nov2011 | 21010 | 1324.67 | -1.75221 | 1 R.MFTPLFE Splice@chr  | 3.84E-12 | 4.95E-04 |
| 29Nov2011 | 3060  | 672.82  | -0.63596 | 2 _HQLTEAS Splice@chr   | 1.54E-11 | 5.79E-04 |
| 29Nov2011 | 23521 | 1123.08 | 8.408819 | 2 R.TFDDVLY Splice@chr  | 7.09E-11 | 0.002139 |
| 29Nov2011 | 25345 | 1288.15 | -28.1526 | 2 _CTAVSAS Splice@chr   | 4.28E-11 | 0.001286 |
| 29Nov2011 | 4464  | 717.38  | -29.5402 | 2 R.RYPVNAC chr4@6445   | 1.51E-10 | 0.004203 |
| 29Nov2011 | 10443 | 800.42  | -11.802  | 2 R.ELWKNSI chrX@1126   | 4.75E-12 | 4.95E-04 |
| 29Nov2011 | 3110  | 672.82  | -0.63596 | 2 _HQLTEAS Splice@chr   | 1.94E-12 | 4.95E-04 |
| 29Nov2011 | 22583 | 1072.55 | -28.1212 | 2 R.YFFLIK NY chr5@1791 | 1.00E-10 | 0.002804 |
| 29Nov2011 | 21075 | 1325.67 | -4.28668 | 1 R.MFTPLFE Splice@chr  | 3.22E-13 | 4.95E-04 |
| 29Nov2011 | 23571 | 1122.58 | 9.904408 | 2 R.TFDDVLY Splice@chr  | 3.84E-11 | 0.001201 |
| 29Nov2011 | 16254 | 484.28  | 10.44055 | 3 K.ISSAIAMF chr4@7542  | 8.83E-11 | 0.002722 |
| 29Nov2011 | 23475 | 1287.29 | 16.47055 | 3 R.TFDDVLY Splice@chr  | 1.77E-11 | 6.70E-04 |
| 29Nov2011 | 14366 | 1111.11 | -2.0893  | 2 R.LLM+15.9 chr4@3282  | 3.51E-10 | 0.008564 |
| 29Nov2011 | 335   | 632.78  | -25.4076 | 2 _KM+15.9 Splice@chr   | 4.12E-10 | 0.009883 |
| 29Nov2011 | 13278 | 1335.08 | 1.28103  | 2 _IESSYDKE Splice@chr  | 4.52E-16 | 0        |
| 29Nov2011 | 22250 | 1384.75 | 16.84983 | 1 K.FQNFAQI chr2@2226   | 2.48E-10 | 0.006587 |

|           |       |         |          |                          |          |          |
|-----------|-------|---------|----------|--------------------------|----------|----------|
| 29Nov2011 | 18013 | 1034.57 | -2.45085 | 2 K.FK+14.01 Splice@chr  | 5.66E-12 | 4.95E-04 |
| 29Nov2011 | 13419 | 1290.68 | -28.6788 | 1 R.NLGAQLk chr5@2091    | 4.11E-10 | 0.009803 |
| 29Nov2011 | 7566  | 1093.52 | -7.26263 | 1 R.EIQSEQG Splice@chr   | 5.69E-11 | 0.001631 |
| 29Nov2011 | 14283 | 1240.68 | -0.19694 | 1 R.TVVVPQ\ Splice@chr   | 6.00E-11 | 0.001892 |
| 29Nov2011 | 13333 | 1335.58 | 0.02368  | 2 _ .IESSYDKE Splice@chr | 8.55E-15 | 1.68E-04 |
| 29Nov2011 | 13335 | 1335.08 | 1.28103  | 2 _ .IESSYDKE Splice@chr | 5.96E-16 | 0        |
| 29Nov2011 | 21615 | 890.45  | 26.12723 | 2 K.GWSVPLI Splice@chr   | 2.26E-10 | 0.006115 |
| 29Nov2011 | 114   | 722.35  | 3.723    | 1 R.FQGGGEI chr1@2595    | 3.38E-10 | 0.00826  |
| 29Nov2011 | 4949  | 741.89  | -19.4947 | 2 K.QKSNWH chr5@1225     | 7.70E-11 | 0.002223 |
| 29Nov2011 | 9331  | 573.97  | 8.990239 | 3 R.VGDIK+1. chrX@2495   | 1.97E-10 | 0.005234 |
| 29Nov2011 | 24401 | 791.9   | -17.5179 | 4 K.SGTIFDNI Splice@chr  | 5.61E-16 | 0        |
| 29Nov2011 | 23494 | 1122.58 | 9.904408 | 2 R.TFDDVLY Splice@chr   | 2.12E-10 | 0.005801 |
| 29Nov2011 | 24483 | 791.9   | -17.5179 | 4 K.SGTIFDNI Splice@chr  | 2.29E-16 | 0        |
| 29Nov2011 | 18286 | 1077.57 | -20.0495 | 2 V.K+14.016 chr4@1240   | 3.31E-11 | 0.001201 |
| 29Nov2011 | 13364 | 1290.68 | -28.6788 | 1 R.NLGAQLk chr5@2091    | 3.98E-10 | 0.009408 |
| 29Nov2011 | 25273 | 962.47  | -16.0654 | 3 R.WFWGQI chr4@3030     | 2.84E-10 | 0.007184 |
| 29Nov2011 | 11375 | 943.58  | 7.64101  | 1 _ .SPLFVPKI chrX@4402  | 1.30E-10 | 0.002659 |
| 29Nov2011 | 3859  | 717.38  | -29.5402 | 2 R.RYPVNAC chr4@6445    | 5.67E-11 | 0.001343 |
| 29Nov2011 | 13785 | 719.39  | 28.86707 | 2 R.FTQAGSE Splice@chr   | 6.30E-14 | 0        |
| 29Nov2011 | 7845  | 1064.59 | 7.411911 | 1 K.YLINGNEI chr1@8687   | 1.25E-10 | 0.002659 |
| 29Nov2011 | 14542 | 854.41  | -27.7489 | 2 _ .KSFEVAIE Splice@chr | 7.13E-20 | 0        |
| 29Nov2011 | 10708 | 1345.63 | -24.7692 | 2 _ .QVREMH Splice@chr   | 1.33E-10 | 0.002865 |
| 29Nov2011 | 8693  | 870.58  | 22.41941 | 1 _ .TPLAKLAI Splice@chr | 3.58E-10 | 0.009334 |
| 29Nov2011 | 21042 | 1123.09 | 17.33367 | 2 R.TFDDVLY Splice@chr   | 1.90E-10 | 0.004456 |
| 29Nov2011 | 17203 | 1275.61 | -17.5458 | 3 R.YSSECPEI Splice@chr  | 1.01E-10 | 0.002053 |
| 29Nov2011 | 22638 | 1288.16 | -20.373  | 2 _ .CTAVSAS Splice@chr  | 1.59E-10 | 0.003869 |
| 29Nov2011 | 7139  | 752.88  | -14.2545 | 2 R.GKCNGG. chr4@5126    | 2.90E-10 | 0.007471 |
| 29Nov2011 | 16328 | 1077.57 | -20.0495 | 2 V.K+14.016 chr4@1240   | 4.74E-11 | 0.001132 |
| 29Nov2011 | 8793  | 870.57  | 10.89471 | 1 _ .TPLAKLAI Splice@chr | 1.26E-10 | 0.002659 |
| 29Nov2011 | 4385  | 626.3   | -9.76097 | 2 R.LCESGAA Splice@chr   | 9.08E-16 | 0        |
| 29Nov2011 | 20899 | 1122.59 | 18.82926 | 2 R.TFDDVLY Splice@chr   | 1.77E-11 | 2.43E-04 |
| 29Nov2011 | 15496 | 894     | -12.2343 | 2 _ .VETGIIKP Splice@chr | 3.18E-10 | 0.00801  |
| 29Nov2011 | 16216 | 1077.57 | -20.0495 | 2 V.K+14.016 chr4@1240   | 2.07E-11 | 4.80E-04 |
| 29Nov2011 | 1301  | 916.49  | -3.60177 | 1 K.QETTPAII chr5@3605   | 1.42E-10 | 0.003172 |
| 29Nov2011 | 13074 | 1289.21 | -12.1094 | 2 K.TKKQKKK chrX@6244    | 1.51E-10 | 0.003464 |
| 29Nov2011 | 7037  | 1025.62 | -1.90621 | 1 K.LGLGSGL chr5@4945    | 6.58E-12 | 1.29E-04 |
| 29Nov2011 | 12172 | 671.37  | -24.0361 | 2 T.FNIVHTQ Splice@chr   | 2.50E-10 | 0.006218 |
| 29Nov2011 | 11810 | 1335.08 | 1.28103  | 2 _ .IESSYDKE Splice@chr | 3.93E-15 | 0        |
| 29Nov2011 | 23531 | 545.82  | 18.37321 | 2 R.RANNLFS chrX@3308    | 4.49E-11 | 0.001132 |
| 29Nov2011 | 18753 | 1325.68 | 3.275484 | 1 R.MFTPLFE Splice@chr   | 1.59E-12 | 1.29E-04 |
| 29Nov2011 | 15446 | 990.5   | -11.7554 | 2 F.RLSESELE chr4@7515   | 4.79E-11 | 0.001132 |
| 29Nov2011 | 23859 | 1129.08 | -6.57578 | 2 R.K+14.016 chr2@5335   | 1.79E-10 | 0.004157 |
| 29Nov2011 | 10648 | 1346.13 | -3.69865 | 2 _ .QVREMH Splice@chr   | 3.09E-10 | 0.007935 |
| 29Nov2011 | 20565 | 1003.52 | 12.6889  | 3 R.CWNRRA Splice@chr    | 1.65E-11 | 2.43E-04 |
| 29Nov2011 | 20127 | 1072.55 | -28.1212 | 2 R.YFFLIKNY chr5@1791   | 4.66E-11 | 0.001132 |
| 29Nov2011 | 22845 | 963.14  | 25.74479 | 3 _ .GCSIVPIS Splice@chr | 1.16E-10 | 0.00257  |
| 29Nov2011 | 79    | 723.35  | -0.92778 | 1 R.FQGGGEI chr1@2595    | 3.38E-10 | 0.008572 |

|           |       |         |          |                         |          |          |
|-----------|-------|---------|----------|-------------------------|----------|----------|
| 29Nov2011 | 11472 | 472.29  | -0.64754 | 2 _SPLFVPKf chrX@440    | 1.30E-10 | 0.002659 |
| 29Nov2011 | 11801 | 1335.58 | 0.02368  | 2 _IESSYDKE Splice@chr  | 5.92E-14 | 0        |
| 29Nov2011 | 17664 | 1113.6  | 21.82308 | 3 R.NWKPKT Splice@chr   | 2.09E-10 | 0.00516  |
| 29Nov2011 | 237   | 545.31  | -14.6894 | 2 K.RLQPTRY chr5@237    | 3.39E-10 | 0.008572 |
| 29Nov2011 | 20694 | 1123.08 | 8.408819 | 2 R.TFDDVLY Splice@chr  | 4.74E-11 | 0.001132 |
| 29Nov2011 | 18702 | 662.84  | -0.09222 | 2 R.MFTPLFE Splice@chr  | 3.69E-11 | 8.09E-04 |
| 29Nov2011 | 18700 | 1325.68 | 3.275484 | 1 R.MFTPLFE Splice@chr  | 7.70E-12 | 2.43E-04 |
| 29Nov2011 | 13838 | 719.39  | 28.86707 | 2 R.FTQAGSE Splice@chr  | 2.78E-13 | 1.29E-04 |
| 29Nov2011 | 16271 | 1077.57 | -20.0495 | 2 V.K+14.01 chr4@124    | 2.01E-11 | 3.62E-04 |
| 29Nov2011 | 14663 | 685.88  | 4.188613 | 2 K.IVPGGGA chrX@157    | 7.15E-12 | 2.43E-04 |
| 29Nov2011 | 11424 | 943.58  | 7.64101  | 1 _SPLFVPKf chrX@440    | 1.33E-10 | 0.002865 |
| 29Nov2011 | 16041 | 1034.57 | -2.45085 | 2 K.FK+14.01 Splice@chr | 9.07E-12 | 2.43E-04 |
| 29Nov2011 | 4284  | 1073.56 | 20.18419 | 2 L.KIDDFEI chr4@168    | 2.65E-10 | 0.006799 |
| 29Nov2011 | 10709 | 1345.13 | -23.5213 | 2 _QVREMH Splice@chr    | 2.55E-10 | 0.006312 |
| 29Nov2011 | 7243  | 677.34  | -8.57314 | 2 K.MQQFST chr5@208     | 2.99E-10 | 0.007646 |
| 29Nov2011 | 13016 | 1289.21 | -12.1094 | 2 K.TKKQKKK chrX@624    | 2.81E-10 | 0.007078 |
| 29Nov2011 | 22639 | 1287.66 | -19.0694 | 2 _CTAVSAS Splice@chr   | 8.95E-12 | 2.43E-04 |
| 29Nov2011 | 10378 | 1173.17 | -9.30319 | 3 K.PTMRTCC Splice@chr  | 2.63E-10 | 0.006602 |
| 29Nov2011 | 11742 | 1335.08 | 1.28103  | 2 _IESSYDKE Splice@chr  | 1.67E-16 | 0        |
| 29Nov2011 | 17964 | 643.08  | -23.5742 | 4 T.ENNKLSK chr5@679    | 1.25E-10 | 0.002659 |
| 29Nov2011 | 17154 | 1275.61 | -17.5458 | 3 R.YSSECPE Splice@chr  | 1.11E-10 | 0.002361 |
| 29Nov2011 | 4414  | 519.61  | -7.21837 | 3 K.IGSM+15 chr5@165    | 3.16E-10 | 0.00801  |
| 29Nov2011 | 22678 | 1288.16 | -20.373  | 2 _CTAVSAS Splice@chr   | 6.11E-14 | 0        |
| 29Nov2011 | 20999 | 1122.58 | 9.904408 | 2 R.TFDDVLY Splice@chr  | 3.15E-10 | 0.00801  |
| 29Nov2011 | 12628 | 1240.68 | -0.19694 | 1 R.TVVVPQ Splice@chr   | 1.94E-10 | 0.004658 |
| 29Nov2011 | 11697 | 571.33  | 16.76655 | 3 _SKINVLEI Splice@chr  | 2.47E-10 | 0.006218 |
| 29Nov2011 | 10435 | 1173.17 | -9.30319 | 3 K.PTMRTCC Splice@chr  | 1.52E-10 | 0.003464 |
| 29Nov2011 | 15791 | 1092.05 | -25.1559 | 2 K.VQYLMAI chr5@203    | 8.27E-11 | 0.001643 |
| 29Nov2011 | 12075 | 565.33  | 5.793462 | 2 R.RSALLCRI Splice@chr | 8.66E-11 | 0.001857 |
| 29Nov2011 | 3561  | 876.41  | -8.50606 | 1 K.TEDEARR chrX@113    | 4.26E-11 | 0.001132 |
| 29Nov2011 | 3559  | 1183.58 | 13.31613 | 1 K.KCNYSKN chrX@124    | 2.19E-10 | 0.005251 |
| 29Nov2011 | 20864 | 1123.09 | 17.33367 | 2 R.TFDDVLY Splice@chr  | 7.33E-11 | 0.001543 |
| 29Nov2011 | 20868 | 1122.58 | 9.904408 | 2 R.TFDDVLY Splice@chr  | 2.03E-11 | 3.62E-04 |
| 29Nov2011 | 15520 | 990.5   | -11.7554 | 2 F.RLSESELE chr4@751   | 2.83E-10 | 0.007078 |
| 29Nov2011 | 8335  | 975.57  | 7.515451 | 1 K.LPKLDAYI chr4@114   | 5.08E-11 | 0.001132 |
| 29Nov2011 | 13451 | 894.41  | 13.57006 | 2 _FDSDDVT Splice@chr   | 4.09E-13 | 1.29E-04 |
| 29Nov2011 | 13450 | 991.54  | -24.3808 | 2 R.RNDRK+1 chr3@480    | 9.52E-11 | 0.002053 |
| 29Nov2011 | 13458 | 833.46  | -21.6039 | 2 R.RRVK+14 chr2@213    | 2.21E-10 | 0.005251 |
| 29Nov2011 | 11721 | 1335.58 | 0.02368  | 2 _IESSYDKE Splice@chr  | 3.06E-16 | 0        |
| 29Nov2011 | 18689 | 1324.67 | -1.75221 | 1 R.MFTPLFE Splice@chr  | 3.30E-12 | 1.29E-04 |
| 29Nov2011 | 3146  | 433.76  | 2.609238 | 2 _IVDLPGPI chr3@110    | 5.72E-11 | 0.001343 |
| 29Nov2011 | 20914 | 1263.61 | -0.55529 | 2 I.QFSCLLAI chr5@173   | 2.14E-10 | 0.005251 |
| 29Nov2011 | 9336  | 948     | -28.7446 | 2 R.KKKM+1 chr5@158     | 3.76E-11 | 9.23E-04 |
| 29Nov2011 | 20998 | 1123.09 | 17.33367 | 2 R.TFDDVLY Splice@chr  | 2.15E-10 | 0.005251 |
| 29Nov2011 | 18185 | 809.11  | 19.47063 | 3 _AKNATKY chr1@309     | 1.49E-13 | 0        |
| 29Nov2011 | 20898 | 1123.09 | 17.33367 | 2 R.TFDDVLY Splice@chr  | 4.08E-11 | 0.001132 |
| 29Nov2011 | 18743 | 1324.67 | -1.75221 | 1 R.MFTPLFE Splice@chr  | 5.76E-11 | 0.001343 |

|           |       |         |          |                         |          |          |
|-----------|-------|---------|----------|-------------------------|----------|----------|
| 29Nov2011 | 7902  | 1064.59 | 7.411911 | 1 K.YLINGNEI chr1@8687  | 2.22E-11 | 5.99E-04 |
| 29Nov2011 | 10654 | 1345.63 | -24.7692 | 2 _QVREMH Splice@chr    | 3.05E-10 | 0.007935 |
| 29Nov2011 | 10655 | 1345.13 | -23.5213 | 2 _QVREMH Splice@chr    | 1.02E-10 | 0.002053 |
| 29Nov2011 | 20658 | 1123.09 | 17.33367 | 2 R.TFDDVLY Splice@chr  | 5.52E-11 | 0.001343 |
| 29Nov2011 | 5924  | 574.81  | -4.78661 | 2 K.NGPNNQ chrX@1712    | 2.40E-10 | 0.005941 |
| 29Nov2011 | 76    | 722.35  | 3.723    | 1 R.FQGGGEI chr1@2595   | 3.33E-10 | 0.008377 |
| 29Nov2011 | 6987  | 1025.62 | -1.90621 | 1 K.LGLGSGL chr5@4945   | 8.02E-12 | 2.43E-04 |
| 29Nov2011 | 7876  | 1063.59 | 10.56915 | 1 K.YLINGNEI chr1@8687  | 7.60E-11 | 0.001543 |
| 29Nov2011 | 10591 | 1345.63 | -24.7692 | 2 _QVREMH Splice@chr    | 3.27E-11 | 8.09E-04 |
| 29Nov2011 | 19276 | 889.95  | -19.8868 | 2 K.RSSVHTE chr2@8442   | 1.92E-11 | 3.62E-04 |
| 29Nov2011 | 2472  | 626.3   | -9.76097 | 2 R.LCESGAA Splice@chr  | 1.27E-15 | 0        |
| 29Nov2011 | 8282  | 739.38  | -18.606  | 3 K.FQKNQYI chr4@1445   | 1.37E-10 | 0.005095 |
| 29Nov2011 | 12282 | 1003.19 | 17.13413 | 3 R.CWNRRA Splice@chr   | 7.30E-13 | 3.47E-04 |
| 29Nov2011 | 3339  | 584.7   | 7.385785 | 5 _TVFYGDL chr4@5567    | 1.88E-10 | 0.006846 |
| 29Nov2011 | 1692  | 431.74  | 5.455516 | 2 _PIQDVYK Splice@chr   | 2.62E-10 | 0.009855 |
| 29Nov2011 | 1079  | 812.9   | -5.52753 | 2 K.KTNAETD chrX@6958   | 5.27E-11 | 0.002276 |
| 29Nov2011 | 1806  | 830.42  | -5.08114 | 1 K.YVYG TAR Splice@chr | 8.80E-11 | 0.004149 |
| 29Nov2011 | 4034  | 1025.62 | -1.90621 | 1 K.LGLGSGL chr5@4945   | 7.51E-11 | 0.002796 |
| 29Nov2011 | 2447  | 626.3   | -9.76097 | 2 R.LCESGAA Splice@chr  | 1.79E-15 | 0        |
| 29Nov2011 | 3581  | 855.43  | -4.18009 | 2 C.AFGFFDS Splice@chr  | 6.79E-11 | 0.002527 |
| 29Nov2011 | 13726 | 1147.25 | 13.44098 | 3 R.FQSAAIG Splice@chr  | 3.78E-13 | 3.47E-04 |
| 29Nov2011 | 10444 | 744.97  | 13.86507 | 2 L.PM+15.9 Splice@chr  | 2.98E-11 | 0.001178 |
| 29Nov2011 | 2504  | 626.3   | -9.76097 | 2 R.LCESGAA Splice@chr  | 1.56E-15 | 0        |
| 29Nov2011 | 13719 | 860.69  | 14.08015 | 4 R.FQSAAIG Splice@chr  | 2.12E-10 | 0.007343 |
| 29Nov2011 | 12666 | 1263.6  | -8.48632 | 2 I.QFSCLLAI chr5@1735  | 1.94E-10 | 0.006846 |
| 29Nov2011 | 8855  | 793.94  | 24.63228 | 2 K.WAERIAI chr3@1297   | 2.23E-10 | 0.008109 |
| 29Nov2011 | 2294  | 626.3   | -9.76097 | 2 R.LCESGAA Splice@chr  | 1.34E-15 | 0        |
| 29Nov2011 | 12397 | 791.9   | -17.5179 | 4 K.SGTIFDNI Splice@chr | 3.23E-13 | 0        |
| 29Nov2011 | 11936 | 1019.83 | -9.02599 | 3 R.QQSPENI Splice@chr  | 7.05E-12 | 0.00177  |
| 29Nov2011 | 11422 | 858.45  | -15.2049 | 2 R.RM+15.9 chr1@1195   | 3.09E-12 | 7.52E-04 |
| 29Nov2011 | 241   | 710.86  | 21.23823 | 2 R.DSTQKW chr3@1337    | 1.87E-11 | 0.002053 |
| 29Nov2011 | 5195  | 1079.58 | 25.35245 | 1 R.FISHFTA chr4@6987   | 1.88E-10 | 0.005834 |
| 29Nov2011 | 11389 | 857.95  | -13.2476 | 2 R.RM+15.9 chr1@1195   | 2.72E-11 | 0.002294 |
| 29Nov2011 | 2262  | 626.3   | -9.76097 | 2 R.LCESGAA Splice@chr  | 1.52E-15 | 0        |
| 29Nov2011 | 5437  | 1034.52 | 26.89942 | 1 K.YNNHINI Splice@chr  | 3.16E-11 | 0.002294 |
| 29Nov2011 | 12401 | 1055.87 | -13.022  | 3 K.SGTIFDNI Splice@chr | 5.99E-12 | 0.001466 |
| 29Nov2011 | 2334  | 626.3   | -9.76097 | 2 R.LCESGAA Splice@chr  | 4.54E-16 | 0        |
| 29Nov2011 | 5088  | 625.82  | -20.2839 | 2 R.K+14.016 chrX@1356  | 6.66E-11 | 0.003763 |
| 29Nov2011 | 1290  | 487.3   | 24.66358 | 2 K.LQTSNGL Splice@chr  | 9.74E-11 | 0.004551 |
| 29Nov2011 | 3310  | 854.93  | -2.21576 | 2 C.AFGFFDS Splice@chr  | 9.14E-11 | 0.004551 |
| 29Nov2011 | 10612 | 988.05  | 18.46899 | 2 K.FDYFNMI chr4@1602   | 1.03E-10 | 0.004551 |
| 29Nov2011 | 416   | 473.26  | -11.3086 | 2 R.SSARGQL Splice@chr  | 9.31E-11 | 0.002742 |
| 29Nov2011 | 2313  | 876.41  | -8.50606 | 1 K.TEDEARR chrX@1138   | 4.26E-11 | 0.001023 |
| 29Nov2011 | 6503  | 754.38  | -17.8031 | 3 R.DAYSEEK chr5@1910   | 2.66E-10 | 0.009899 |
| 29Nov2011 | 2231  | 717.38  | -29.5402 | 2 R.RYPVNAC chr4@6445   | 1.31E-10 | 0.005355 |
| 29Nov2011 | 4590  | 1141.6  | 2.996671 | 1 K.ENKPSRG Splice@chr  | 1.35E-10 | 0.005712 |
| 29Nov2011 | 6055  | 1050.99 | 9.800655 | 2 R.SYLLKNEI Splice@chr | 2.76E-11 | 4.19E-04 |

|           |       |         |          |                         |          |          |
|-----------|-------|---------|----------|-------------------------|----------|----------|
| 29Nov2011 | 3072  | 794.43  | -5.96418 | 2 R.TK+14.01 chr1@7238  | 3.59E-11 | 6.19E-04 |
| 29Nov2011 | 146   | 823.42  | -23.1545 | 2 R.KYEEVRY Splice@chr  | 1.07E-12 | 2.13E-04 |
| 29Nov2011 | 3020  | 794.43  | -5.96418 | 2 R.TK+14.01 chr1@7238  | 8.94E-11 | 0.002742 |
| 29Nov2011 | 2964  | 794.43  | -5.96418 | 2 R.TK+14.01 chr1@7238  | 2.22E-11 | 2.13E-04 |
| 29Nov2011 | 1185  | 545.81  | -0.83904 | 2 K.FPVAAK+ chr3@1034   | 1.36E-10 | 0.005712 |
| 29Nov2011 | 78    | 479.79  | -15.6161 | 2 _K.MVSPRI chr1@1106   | 2.24E-10 | 0.008321 |
| 29Nov2011 | 12293 | 1275.61 | -17.5458 | 3 R.YSSECPE( Splice@chr | 1.96E-10 | 0.007622 |
| 29Nov2011 | 1903  | 411.55  | -26.8589 | 3 K.ALQM+1! chr3@1125   | 1.35E-10 | 0.005712 |
| 29Nov2011 | 2436  | 717.39  | -15.558  | 2 R.RYPVNAC chr4@6445   | 9.19E-11 | 0.002742 |
| 29Nov2011 | 15308 | 791.9   | -17.5179 | 4 K.SGTIFDNI Splice@chr | 3.62E-16 | 0        |
| 29Nov2011 | 15325 | 792.15  | -18.5783 | 4 K.SGTIFDNI Splice@chr | 2.72E-13 | 0        |
| 29Nov2011 | 4360  | 507.3   | -7.17287 | 2 K.IVEIDVLG chr5@1932  | 1.76E-10 | 0.006921 |
| 29Nov2011 | 4563  | 1142.6  | 0.055393 | 1 K.ENKPSRG Splice@chr  | 4.18E-11 | 0.001023 |
| 29Nov2011 | 4548  | 1141.6  | 2.996671 | 1 K.ENKPSRG Splice@chr  | 1.64E-10 | 0.006762 |
| 29Nov2011 | 4412  | 868.43  | 10.92162 | 1 K.SSSGSLSS chr2@1132  | 2.49E-10 | 0.009196 |
| 29Nov2011 | 9637  | 752.37  | -29.649  | 2 R.AEEIEEK+ chr2@1375  | 1.76E-10 | 0.006921 |
| 29Nov2011 | 4405  | 507.3   | -7.17287 | 2 K.IVEIDVLG chr5@1932  | 1.09E-10 | 0.004269 |
| 29Nov2011 | 14496 | 1020.16 | -13.3985 | 3 R.QQSPENC Splice@chr  | 1.80E-10 | 0.006921 |
| 29Nov2011 | 17087 | 716.41  | 6.313414 | 1 K.GTGVGLC chr3@5080   | 5.32E-11 | 0.001414 |
| 29Nov2011 | 13636 | 858.45  | -15.2049 | 2 R.RM+15.9 chr1@1195   | 1.46E-12 | 2.13E-04 |
| 29Nov2011 | 5133  | 653.52  | 3.205766 | 4 R.KCDQCEI chr4@5179   | 2.36E-11 | 4.19E-04 |
| 29Nov2011 | 126   | 823.42  | -23.1545 | 2 R.KYEEVRY Splice@chr  | 7.28E-13 | 0        |
| 29Nov2011 | 4139  | 1141.59 | -5.77929 | 1 K.ENKPSRG Splice@chr  | 2.14E-11 | 0.001276 |
| 29Nov2011 | 11847 | 895     | -10.9918 | 2 K.M+15.99 chrX@1449   | 2.07E-10 | 0.006517 |
| 29Nov2011 | 664   | 409.74  | -10.6768 | 2 K.MVITNLK Splice@chr  | 2.70E-10 | 0.007552 |
| 29Nov2011 | 2614  | 541.8   | -25.5845 | 2 K.RCLHALR Splice@chr  | 3.07E-10 | 0.009446 |
| 29Nov2011 | 8125  | 794.05  | -19.1707 | 3 _WM+15.5 chr2@3294    | 2.41E-11 | 0.001276 |
| 29Nov2011 | 5496  | 1050.99 | 9.800655 | 2 R.SYLLKNEI Splice@chr | 1.41E-12 | 0        |
| 29Nov2011 | 10421 | 1077.57 | -20.0495 | 2 V.K+14.016 chr4@1240  | 4.15E-11 | 0.001967 |
| 29Nov2011 | 2013  | 717.39  | -15.558  | 2 R.RYPVNAC chr4@6445   | 7.83E-11 | 0.003074 |
| 29Nov2011 | 2711  | 794.43  | -5.96418 | 2 R.TK+14.01 chr1@7238  | 1.92E-11 | 0.001276 |
| 29Nov2011 | 4770  | 566.31  | 21.45326 | 2 R.EVAQLEC chr5@1706   | 5.16E-11 | 0.001967 |
| 29Nov2011 | 6677  | 1346.13 | -3.69865 | 2 _QVREMH Splice@chr    | 2.68E-10 | 0.007552 |
| 29Nov2011 | 2817  | 794.43  | -5.96418 | 2 R.TK+14.01 chr1@7238  | 5.12E-11 | 0.001967 |
| 29Nov2011 | 6638  | 1345.63 | -24.7692 | 2 _QVREMH Splice@chr    | 1.83E-10 | 0.005897 |
| 29Nov2011 | 7206  | 618.83  | -6.67202 | 2 _QIMNNFI Splice@chr   | 1.17E-10 | 0.004201 |
| 29Nov2011 | 3496  | 518.01  | -14.4971 | 4 K.DLEKSSM Splice@chr  | 1.58E-10 | 0.005682 |
| 29Nov2011 | 2680  | 447.25  | -0.40838 | 2 R.IFSAGELF chr3@5608  | 1.87E-10 | 0.005897 |
| 29Nov2011 | 1878  | 815.93  | -18.3219 | 2 K.KNKKGQI chr5@8214   | 2.38E-10 | 0.006934 |
| 29Nov2011 | 7450  | 1146.07 | 17.51893 | 2 K.VIGIQEYI Splice@chr | 1.06E-11 | 7.92E-04 |
| 29Nov2011 | 12601 | 1003.2  | 27.12227 | 3 R.CWNRRA Splice@chr   | 1.26E-10 | 0.004661 |
| 29Nov2011 | 2762  | 794.43  | -5.96418 | 2 R.TK+14.01 chr1@7238  | 1.77E-11 | 7.92E-04 |
| 29Nov2011 | 12622 | 1003.53 | 22.67704 | 3 R.CWNRRA Splice@chr   | 7.85E-12 | 7.92E-04 |
| 29Nov2011 | 13141 | 792.15  | -18.5783 | 4 K.SGTIFDNI Splice@chr | 1.65E-14 | 0        |
| 29Nov2011 | 13142 | 1055.87 | -13.022  | 3 K.SGTIFDNI Splice@chr | 1.93E-13 | 0        |
| 29Nov2011 | 3558  | 518.01  | -14.4971 | 4 K.DLEKSSM Splice@chr  | 4.82E-11 | 0.002276 |
| 29Nov2011 | 2735  | 794.43  | -5.96418 | 2 R.TK+14.01 chr1@7238  | 8.37E-11 | 0.003959 |

|           |       |         |          |                          |          |          |
|-----------|-------|---------|----------|--------------------------|----------|----------|
| 29Nov2011 | 8902  | 752.37  | -29.649  | 2 R.AEEIEEK+ chr2@1375   | 1.42E-10 | 0.005968 |
| 29Nov2011 | 2713  | 626.3   | -9.76097 | 2 R.LCESGAA Splice@chr   | 4.27E-16 | 0        |
| 29Nov2011 | 536   | 718.38  | -2.21222 | 1 R.DGIVGEK chr2@6947    | 1.84E-10 | 0.007547 |
| 29Nov2011 | 1067  | 545.81  | -0.83904 | 2 K.FPVAAK+ chr3@1034    | 1.39E-10 | 0.005754 |
| 29Nov2011 | 2590  | 601.83  | -1.4222  | 2 R.LMRDAEI chr5@1235    | 9.45E-11 | 0.004411 |
| 29Nov2011 | 2005  | 830.42  | -5.08114 | 1 K.YVYG TAR Splice@chr  | 1.76E-10 | 0.007106 |
| 29Nov2011 | 7664  | 908.48  | -17.0161 | 2 _ .RISSRAVF Splice@chr | 1.54E-10 | 0.006196 |
| 29Nov2011 | 12556 | 761.88  | -22.6877 | 4 K.FSENF FK- chr4@7785  | 1.19E-10 | 0.005309 |
| 29Nov2011 | 121   | 823.42  | -23.1545 | 2 R.KYEEVRY Splice@chr   | 8.38E-14 | 0        |
| 29Nov2011 | 10147 | 990.5   | -11.7554 | 2 F.RLSESELE chr4@7515   | 1.27E-10 | 0.005528 |
| 29Nov2011 | 2782  | 1141.11 | -9.93404 | 2 V.KLIGTDPI Splice@chr  | 2.13E-10 | 0.009383 |
| 29Nov2011 | 2819  | 794.43  | -5.96418 | 2 R.TK+14.01 chr1@7238   | 3.51E-11 | 0.001548 |
| 29Nov2011 | 3100  | 816.93  | -8.79362 | 2 F.FHFRNAS chr4@9404    | 2.30E-10 | 0.009795 |
| 29Nov2011 | 13753 | 791.9   | -17.5179 | 4 K.SGTIFDNI Splice@chr  | 3.28E-16 | 0        |
| 29Nov2011 | 4092  | 507.3   | -7.17287 | 2 K.IVEIDVLG chr5@1932   | 2.24E-10 | 0.009579 |
| 29Nov2011 | 7656  | 908.98  | -18.8645 | 2 _ .RISSRAVF Splice@chr | 1.73E-11 | 0.001326 |
| 29Nov2011 | 2775  | 794.43  | -5.96418 | 2 R.TK+14.01 chr1@7238   | 2.96E-11 | 0.001548 |
| 29Nov2011 | 8803  | 1114.6  | 7.782975 | 2 S.LYSSCPC chrX@1175    | 1.91E-10 | 0.007547 |
| 29Nov2011 | 4319  | 866.47  | -13.5535 | 1 R.TTAIGFG, chr1@1378   | 2.16E-10 | 0.009579 |
| 29Nov2011 | 4635  | 689.4   | 10.07229 | 2 R.NQSASSv chr4@5261    | 7.37E-11 | 0.001906 |
| 29Nov2011 | 996   | 545.81  | -0.83904 | 2 K.FPVAAK+ chr3@1034    | 1.63E-10 | 0.004927 |
| 29Nov2011 | 7336  | 908.98  | -18.8645 | 2 _ .RISSRAVF Splice@chr | 1.83E-10 | 0.005919 |
| 29Nov2011 | 11002 | 1045.19 | 15.74348 | 3 Q.YEDHVQ chr3@7574     | 2.60E-10 | 0.009052 |
| 29Nov2011 | 2632  | 446.75  | 3.354779 | 2 R.IFSAGELF chr3@5608   | 1.87E-10 | 0.005919 |
| 29Nov2011 | 2612  | 626.3   | -9.76097 | 2 R.LCESGAA Splice@chr   | 6.45E-16 | 0        |
| 29Nov2011 | 9883  | 1145.09 | 5.258106 | 2 P.YVAMRIN Splice@chr   | 1.54E-10 | 0.004927 |
| 29Nov2011 | 2697  | 793.42  | 19.33353 | 2 R.NEKYSTV Splice@chr   | 2.19E-10 | 0.007636 |
| 29Nov2011 | 8347  | 1115.1  | 6.276672 | 2 S.LYSSCPC chrX@1175    | 1.86E-10 | 0.005919 |
| 29Nov2011 | 12159 | 858.45  | -15.2049 | 2 R.RM+15.9 chr1@1195    | 8.49E-11 | 0.002167 |
| 29Nov2011 | 2707  | 794.43  | -5.96418 | 2 R.TK+14.01 chr1@7238   | 1.05E-10 | 0.002924 |
| 29Nov2011 | 2494  | 541.8   | -25.5845 | 2 K.RCLHALR Splice@chr   | 2.01E-10 | 0.006645 |
| 29Nov2011 | 1024  | 545.81  | -0.83904 | 2 K.FPVAAK+ chr3@1034    | 1.72E-10 | 0.005177 |
| 29Nov2011 | 6020  | 1034.52 | 26.89942 | 1 K.YNNHINN Splice@chr   | 1.04E-10 | 0.002924 |
| 29Nov2011 | 11227 | 1045.18 | 6.235042 | 3 Q.YEDHVQ chr3@7574     | 1.00E-10 | 0.002678 |
| 29Nov2011 | 3552  | 746.41  | -19.019  | 1 K.KAGGVD, Splice@chr   | 1.28E-10 | 0.003683 |
| 29Nov2011 | 12808 | 1072.56 | -18.7756 | 2 R.YFFLIKNY chr5@1791   | 3.68E-11 | 0.001123 |
| 29Nov2011 | 2600  | 793.93  | -3.84873 | 2 R.TK+14.01 chr1@7238   | 2.15E-10 | 0.007134 |
| 29Nov2011 | 12828 | 1019.83 | -9.02599 | 3 R.QQSPENC Splice@chr   | 1.88E-12 | 5.96E-04 |
| 29Nov2011 | 6548  | 1345.63 | -24.7692 | 2 _ .QVREMH Splice@chr   | 1.58E-10 | 0.004927 |
| 29Nov2011 | 2661  | 794.43  | -5.96418 | 2 R.TK+14.01 chr1@7238   | 4.01E-11 | 0.001123 |
| 29Nov2011 | 12194 | 858.45  | -15.2049 | 2 R.RM+15.9 chr1@1195    | 7.32E-12 | 5.96E-04 |
| 29Nov2011 | 7383  | 908.98  | -18.8645 | 2 _ .RISSRAVF Splice@chr | 1.20E-11 | 5.96E-04 |
| 29Nov2011 | 2744  | 793.42  | 19.33353 | 2 R.NEKYSTV Splice@chr   | 6.27E-11 | 0.001651 |
| 29Nov2011 | 2566  | 626.3   | -9.76097 | 2 R.LCESGAA Splice@chr   | 4.23E-14 | 0        |
| 29Nov2011 | 4680  | 566.31  | 21.45326 | 2 R.EVAQLEC chr5@1706    | 3.28E-11 | 0.001123 |
| 29Nov2011 | 7910  | 711.85  | -2.70508 | 2 R.SLHTLFST Splice@chr  | 1.80E-10 | 0.005676 |
| 29Nov2011 | 4402  | 518.01  | -14.4971 | 4 K.DLEKSSM Splice@chr   | 2.70E-10 | 0.00786  |

|           |       |         |          |                         |          |          |
|-----------|-------|---------|----------|-------------------------|----------|----------|
| 29Nov2011 | 2687  | 876.41  | -8.50606 | 1 K.TEDEARR chrX@1138   | 4.26E-11 | 9.90E-04 |
| 29Nov2011 | 3550  | 1107.57 | -12.7508 | 1 _..SSLDKESC chr5@1239 | 1.74E-10 | 0.004599 |
| 29Nov2011 | 132   | 823.42  | -23.1545 | 2 R.KYEEVRY Splice@chr  | 8.04E-14 | 0        |
| 29Nov2011 | 2525  | 1043.59 | 28.92073 | 1 K.SSTHQSK chr5@2798   | 2.64E-11 | 8.57E-04 |
| 29Nov2011 | 10079 | 794.05  | -19.1707 | 3 _..WM+15.9 chr2@3294  | 2.50E-11 | 8.57E-04 |
| 29Nov2011 | 5957  | 566.31  | 21.45326 | 2 R.EVAQLEC chr5@1706   | 1.98E-10 | 0.004835 |
| 29Nov2011 | 13001 | 917     | 8.168234 | 2 R.LTGNISM chrX@3445   | 2.17E-10 | 0.005609 |
| 29Nov2011 | 10838 | 719.39  | 28.86707 | 2 R.FTQAGSE Splice@chr  | 4.88E-13 | 0        |
| 29Nov2011 | 4347  | 604.83  | -0.40433 | 2 K.SISFSPD Splice@chr  | 1.41E-10 | 0.003321 |
| 29Nov2011 | 8279  | 1345.63 | -24.7692 | 2 _..QVREMH Splice@chr  | 1.13E-10 | 0.003082 |
| 29Nov2011 | 14995 | 858.45  | -15.2049 | 2 R.RM+15.9 chr1@1195   | 1.16E-12 | 0        |
| 29Nov2011 | 2630  | 876.41  | -8.50606 | 1 K.TEDEARR chrX@1138   | 4.26E-11 | 9.90E-04 |
| 29Nov2011 | 14682 | 1216.58 | -19.8654 | 2 L.RNTRNDI chr4@1012   | 1.14E-10 | 0.003082 |
| 29Nov2011 | 2875  | 741.39  | -17.2291 | 2 K.QKSNWH chr5@1229    | 2.34E-11 | 8.57E-04 |
| 29Nov2011 | 3388  | 794.43  | -5.96418 | 2 R.TK+14.01 chr1@7238  | 7.19E-11 | 0.001921 |
| 29Nov2011 | 3561  | 620.83  | -20.0532 | 2 F.QYELATIF chrX@1616  | 2.30E-10 | 0.006362 |
| 29Nov2011 | 15973 | 1020.17 | -3.57375 | 3 R.QQSPENC Splice@chr  | 2.31E-10 | 0.006362 |
| 29Nov2011 | 3446  | 794.43  | -5.96418 | 2 R.TK+14.01 chr1@7238  | 6.20E-11 | 0.00166  |
| 29Nov2011 | 4304  | 517.76  | -12.8742 | 4 K.DLEKSSM Splice@chr  | 3.22E-10 | 0.009199 |
| 29Nov2011 | 6013  | 566.31  | 21.45326 | 2 R.EVAQLEC chr5@1706   | 2.93E-11 | 8.57E-04 |
| 29Nov2011 | 7919  | 762.39  | -14.4775 | 2 K.KM+15.9 chr1@3075   | 3.42E-10 | 0.009805 |
| 29Nov2011 | 5382  | 1025.62 | -1.90621 | 1 K.LGLGSGL chr5@4945   | 7.37E-12 | 4.68E-04 |
| 29Nov2011 | 7519  | 565.83  | 14.11658 | 2 R.ISLTNANI chr5@7795  | 2.62E-10 | 0.007489 |
| 29Nov2011 | 5769  | 559.79  | 11.35993 | 2 R.DGWSIGC chr4@4255   | 2.47E-10 | 0.006605 |
| 29Nov2011 | 1339  | 946.5   | 4.583344 | 1 R.DNTLNLT chr1@8800   | 2.32E-10 | 0.006362 |
| 29Nov2011 | 4349  | 518.01  | -14.4971 | 4 K.DLEKSSM Splice@chr  | 6.63E-12 | 4.68E-04 |
| 29Nov2011 | 8280  | 1345.13 | -23.5213 | 2 _..QVREMH Splice@chr  | 1.00E-10 | 0.002562 |
| 29Nov2011 | 10265 | 1289.21 | -12.1094 | 2 K.TKKQKKK chrX@6244   | 3.42E-10 | 0.009805 |
| 29Nov2011 | 8223  | 1345.63 | -24.7692 | 2 _..QVREMH Splice@chr  | 2.86E-11 | 8.57E-04 |
| 29Nov2011 | 13092 | 858.47  | 8.08511  | 2 R.RM+15.9 chr1@1195   | 9.85E-11 | 0.002562 |
| 29Nov2011 | 3333  | 793.93  | -3.84873 | 2 R.TK+14.01 chr1@7238  | 1.32E-10 | 0.00319  |
| 29Nov2011 | 3700  | 794.43  | -5.96418 | 2 R.TK+14.01 chr1@7238  | 5.25E-11 | 0.001266 |
| 29Nov2011 | 7303  | 625.82  | -20.2839 | 2 R.K+14.016 chrX@1356  | 2.70E-10 | 0.007367 |
| 29Nov2011 | 8282  | 1345.63 | -24.7692 | 2 _..QVREMH Splice@chr  | 9.56E-11 | 0.002459 |
| 29Nov2011 | 3647  | 794.43  | -5.96418 | 2 R.TK+14.01 chr1@7238  | 1.94E-11 | 3.39E-04 |
| 29Nov2011 | 4041  | 620.83  | -20.0532 | 2 F.QYELATIF chrX@1616  | 2.64E-10 | 0.006799 |
| 29Nov2011 | 7194  | 625.82  | -20.2839 | 2 R.K+14.016 chrX@1356  | 3.01E-10 | 0.008039 |
| 29Nov2011 | 3591  | 794.43  | -5.96418 | 2 R.TK+14.01 chr1@7238  | 4.11E-11 | 0.001128 |
| 29Nov2011 | 6670  | 975.56  | -2.75567 | 1 K.LPKLDAYI chr4@1149  | 3.81E-11 | 9.74E-04 |
| 29Nov2011 | 12529 | 983.47  | 6.336758 | 2 R.SFSTIPDS chr2@1305  | 2.20E-11 | 8.41E-04 |
| 29Nov2011 | 598   | 444.25  | -3.23598 | 2 R.AELSSRPI chr3@8104  | 7.86E-11 | 0.002014 |
| 29Nov2011 | 3731  | 793.93  | -3.84873 | 2 R.TK+14.01 chr1@7238  | 1.30E-10 | 0.003328 |
| 29Nov2011 | 14395 | 1095.91 | 12.70999 | 3 K.VSNVLTV Splice@chr  | 2.07E-10 | 0.005857 |
| 29Nov2011 | 5704  | 1025.62 | -1.90621 | 1 K.LGLGSGL chr5@4945   | 2.32E-11 | 9.74E-04 |
| 29Nov2011 | 4780  | 517.76  | -12.8742 | 4 K.DLEKSSM Splice@chr  | 1.62E-10 | 0.004482 |
| 29Nov2011 | 3362  | 737.9   | 2.363663 | 2 K.VSWVAQ chr1@3777    | 1.22E-10 | 0.003185 |
| 29Nov2011 | 6181  | 566.31  | 21.45326 | 2 R.EVAQLEC chr5@1706   | 1.97E-11 | 5.07E-04 |

|           |       |         |          |                         |          |          |
|-----------|-------|---------|----------|-------------------------|----------|----------|
| 29Nov2011 | 8391  | 1345.63 | -24.7692 | 2 _QVREMH Splice@chr    | 1.89E-10 | 0.00559  |
| 29Nov2011 | 9259  | 705.69  | -2.85859 | 3 R.TFSKNFTI chr4@138   | 2.28E-10 | 0.006273 |
| 29Nov2011 | 12481 | 983.47  | 6.336758 | 2 R.SFSTIPDS Splice@chr | 1.61E-10 | 0.004482 |
| 29Nov2011 | 13286 | 1187.08 | -3.06225 | 2 H.YYFESKFI chr2@968   | 2.29E-10 | 0.006398 |
| 29Nov2011 | 11369 | 1040.53 | -29.1053 | 2 V.IFSKINKN chr5@172   | 1.26E-11 | 3.39E-04 |
| 29Nov2011 | 8442  | 1345.13 | -23.5213 | 2 _QVREMH Splice@chr    | 1.99E-10 | 0.005736 |
| 29Nov2011 | 10697 | 752.37  | -29.649  | 2 R.AEEIEEK+ chr2@137   | 2.17E-10 | 0.006273 |
| 29Nov2011 | 3190  | 537.3   | 7.397674 | 2 K.IAENSVEI chr3@107   | 2.99E-10 | 0.0079   |
| 29Nov2011 | 15353 | 1019.83 | -9.02599 | 3 R.QQSPEN( Splice@chr  | 1.56E-10 | 0.004482 |
| 29Nov2011 | 636   | 444.25  | -3.23598 | 2 R.AELSSRPI chr3@810   | 2.15E-10 | 0.006    |
| 29Nov2011 | 15688 | 896.49  | -18.3405 | 3 F.IFAGQRT, chrX@706   | 1.50E-10 | 0.004049 |
| 29Nov2011 | 617   | 444.25  | -3.23598 | 2 R.AELSSRPI chr3@810   | 7.86E-11 | 0.002014 |
| 29Nov2011 | 5620  | 1026.62 | -5.1804  | 1 K.LGLGSL chr5@494     | 8.89E-11 | 0.002159 |
| 29Nov2011 | 7246  | 625.82  | -20.2839 | 2 R.K+14.01 chrX@135    | 4.81E-11 | 0.001266 |
| 29Nov2011 | 13248 | 1187.08 | -3.06225 | 2 H.YYFESKFI chr2@968   | 2.66E-10 | 0.007084 |
| 29Nov2011 | 3999  | 620.83  | -20.0532 | 2 F.QYELATIF chrX@161   | 2.97E-10 | 0.007763 |
| 29Nov2011 | 8392  | 1345.13 | -23.5213 | 2 _QVREMH Splice@chr    | 3.65E-10 | 0.009933 |
| 29Nov2011 | 2974  | 537.3   | 7.397674 | 2 K.IAENSVEI chr3@107   | 1.14E-10 | 0.002746 |
| 29Nov2011 | 20011 | 1062.1  | 10.38858 | 2 R.QICPSRLI chr1@106   | 2.86E-10 | 0.008    |
| 29Nov2011 | 19340 | 1287.65 | -26.8489 | 2 _CTAVSAS Splice@chr   | 2.06E-10 | 0.00631  |
| 29Nov2011 | 2854  | 433.76  | 2.609238 | 2 _IVDLPGPI chr3@110    | 5.05E-11 | 0.001591 |
| 29Nov2011 | 7393  | 870.58  | 22.41941 | 1 _TPLAKLAI Splice@chr  | 3.59E-10 | 0.009429 |
| 29Nov2011 | 7531  | 870.57  | 10.89471 | 1 _TPLAKLAI Splice@chr  | 1.56E-10 | 0.005293 |
| 29Nov2011 | 3850  | 794.43  | -5.96418 | 2 R.TK+14.01 chr1@723   | 5.85E-11 | 0.002067 |
| 29Nov2011 | 19371 | 1288.15 | -28.1526 | 2 _CTAVSAS Splice@chr   | 2.53E-11 | 8.84E-04 |
| 29Nov2011 | 5493  | 507.3   | -7.17287 | 2 K.IVEIDVLG chr5@193   | 2.60E-10 | 0.007166 |
| 29Nov2011 | 5248  | 985     | 25.53932 | 2 _TLNVNGC Splice@chr   | 7.66E-12 | 3.95E-04 |
| 29Nov2011 | 2988  | 876.41  | -8.50606 | 1 K.TEDEARR chrX@113    | 4.26E-11 | 0.001106 |
| 29Nov2011 | 18178 | 1122.59 | 18.82926 | 2 R.TFDDVLY Splice@chr  | 2.00E-10 | 0.006229 |
| 29Nov2011 | 14666 | 1275.61 | -17.5458 | 3 R.YSSECPE( Splice@chr | 1.03E-11 | 3.95E-04 |
| 29Nov2011 | 14046 | 1077.07 | -18.4907 | 2 V.KK+14.01 chr4@124   | 1.70E-10 | 0.005716 |
| 29Nov2011 | 18702 | 792.15  | -18.5783 | 4 K.SGTIFDNI Splice@chr | 1.26E-11 | 3.95E-04 |
| 29Nov2011 | 17605 | 873.48  | 25.16572 | 2 R.SIFVDLEP Splice@chr | 7.32E-11 | 0.002761 |
| 29Nov2011 | 12956 | 858.48  | 6.006088 | 3 _LETGIKPI Splice@chr  | 6.27E-13 | 1.46E-04 |
| 29Nov2011 | 3520  | 962.52  | 2.73466  | 1 K.ADRVMIE chr4@494    | 7.40E-11 | 0.002877 |
| 29Nov2011 | 17701 | 1330.17 | 27.12755 | 2 F.YEEMDYI' Splice@chr | 3.79E-11 | 0.001106 |
| 29Nov2011 | 18189 | 1123.09 | 17.33367 | 2 R.TFDDVLY Splice@chr  | 3.14E-10 | 0.008598 |
| 29Nov2011 | 13959 | 1077.07 | -18.4907 | 2 V.K+14.01 chr4@124    | 1.28E-10 | 0.004204 |
| 29Nov2011 | 19769 | 962.8   | 19.96909 | 3 _GCSIVPIS Splice@chr  | 1.91E-10 | 0.006136 |
| 29Nov2011 | 18212 | 1122.59 | 18.82926 | 2 R.TFDDVLY Splice@chr  | 3.00E-10 | 0.008314 |
| 29Nov2011 | 17666 | 1003.19 | 17.13413 | 3 R.CWNRRA Splice@chr   | 5.35E-12 | 2.77E-04 |
| 29Nov2011 | 1764  | 672.82  | -0.63596 | 2 _HQLTEAS Splice@chr   | 2.03E-10 | 0.006229 |
| 29Nov2011 | 9753  | 472.29  | -0.64754 | 2 _SPLFVPKI chrX@440    | 1.37E-10 | 0.004533 |
| 29Nov2011 | 16790 | 889.95  | -19.8868 | 2 K.RSSVHTE chr2@844    | 6.28E-11 | 0.002181 |
| 29Nov2011 | 11890 | 719.39  | 28.86707 | 2 R.FTQAGSE Splice@chr  | 5.00E-14 | 0        |
| 29Nov2011 | 19915 | 1049.04 | 24.50237 | 2 F.QFFHEIQI chrX@192   | 2.42E-10 | 0.006745 |
| 29Nov2011 | 3797  | 794.43  | -5.96418 | 2 R.TK+14.01 chr1@723   | 3.90E-11 | 0.001106 |

|           |       |         |          |                          |          |          |
|-----------|-------|---------|----------|--------------------------|----------|----------|
| 29Nov2011 | 17357 | 1003.19 | 17.13413 | 3 R.CWNRRA Splice@chr    | 2.28E-11 | 8.84E-04 |
| 29Nov2011 | 16269 | 1324.67 | -1.75221 | 1 R.MFTPLFE Splice@chr   | 5.38E-12 | 2.77E-04 |
| 29Nov2011 | 18668 | 968.47  | 20.13314 | 3 _CSIRPISG Splice@chr   | 1.53E-10 | 0.005077 |
| 29Nov2011 | 13196 | 722.37  | -21.8005 | 2 R.ESEIVHTI chrX@1209   | 1.99E-10 | 0.006229 |
| 29Nov2011 | 14796 | 1275.61 | -17.5458 | 3 R.YSSECEPE Splice@chr  | 1.51E-10 | 0.005077 |
| 29Nov2011 | 9831  | 943.58  | 7.64101  | 1 _SPLFVPKI chrX@4402    | 1.30E-10 | 0.004435 |
| 29Nov2011 | 3289  | 741.89  | -19.4947 | 2 K.QKSNWH chr5@1229     | 1.73E-11 | 7.77E-04 |
| 29Nov2011 | 9969  | 1335.59 | 7.526856 | 2 _IESSYDKE Splice@chr   | 6.02E-16 | 0        |
| 29Nov2011 | 18108 | 957.5   | 1.956888 | 3 R.FIEPIEDIF Splice@chr | 8.24E-11 | 0.003212 |
| 29Nov2011 | 18392 | 1216.6  | -3.3897  | 2 L.RNTRNDI chr4@1012    | 2.68E-10 | 0.007591 |
| 29Nov2011 | 3030  | 876.41  | -8.50606 | 1 K.TEDEARR chrX@1138    | 1.63E-10 | 0.005716 |
| 29Nov2011 | 2899  | 717.38  | -29.5402 | 2 R.RYPVNAC chr4@6445    | 8.54E-11 | 0.003212 |
| 29Nov2011 | 14010 | 1077.07 | -18.4907 | 2 V.K+14.016 chr4@1240   | 8.56E-11 | 0.003212 |
| 29Nov2011 | 3792  | 1073.56 | 20.18419 | 2 L.KIDDFEII chr4@1685   | 2.34E-10 | 0.006415 |
| 29Nov2011 | 15016 | 864.1   | -6.10672 | 3 _TITEQIQE Splice@chr   | 1.41E-10 | 0.004636 |
| 29Nov2011 | 13309 | 1143.61 | 23.6492  | 2 R.AFFVRM- chr5@1055    | 2.51E-10 | 0.006943 |
| 29Nov2011 | 7196  | 975.56  | -2.75567 | 1 K.LPKLDAYI chr4@1149   | 1.27E-10 | 0.004204 |
| 29Nov2011 | 6453  | 689.4   | 10.07229 | 2 R.NQSASSv chr4@5261    | 1.67E-10 | 0.005716 |
| 29Nov2011 | 7434  | 870.57  | 10.89471 | 1 _TPLAKLAI Splice@chr   | 3.08E-10 | 0.008414 |
| 29Nov2011 | 8683  | 595.33  | -18.0744 | 3 K.LKLTAKI chr5@9936    | 2.08E-10 | 0.00631  |
| 29Nov2011 | 1827  | 500.94  | -13.5108 | 3 K.IAEK+14.1 chr3@2136  | 2.63E-10 | 0.007485 |
| 29Nov2011 | 14009 | 1077.57 | -20.0495 | 2 V.K+14.016 chr4@1240   | 7.55E-11 | 0.002877 |
| 29Nov2011 | 13954 | 1077.57 | -20.0495 | 2 V.K+14.016 chr4@1240   | 1.89E-11 | 7.77E-04 |
| 29Nov2011 | 18651 | 791.9   | -17.5179 | 4 K.SGTIFDNI Splice@chr  | 4.13E-16 | 0        |
| 29Nov2011 | 13978 | 761.62  | -1.82546 | 4 S.RTEDPNL Splice@chr   | 3.35E-12 | 2.77E-04 |
| 29Nov2011 | 2092  | 474.27  | -3.41897 | 2 R.ATGGSAL chr5@1068    | 6.44E-11 | 0.002298 |
| 29Nov2011 | 19339 | 1288.15 | -28.1526 | 2 _CTAVSAS Splice@chr    | 3.76E-11 | 0.001106 |
| 29Nov2011 | 3904  | 794.43  | -5.96418 | 2 R.TK+14.01 chr1@7238   | 8.01E-11 | 0.003107 |
| 29Nov2011 | 18773 | 1216.59 | -11.6275 | 2 L.RNTRNDI chr4@1012    | 1.61E-10 | 0.005514 |
| 29Nov2011 | 10828 | 801.43  | 2.557449 | 2 V.ENLNFRC chr2@1407    | 9.74E-12 | 3.95E-04 |
| 29Nov2011 | 7944  | 625.82  | -20.2839 | 2 R.K+14.016 chrX@1356   | 1.03E-10 | 0.003532 |
| 29Nov2011 | 14627 | 1275.61 | -17.5458 | 3 R.YSSECEPE Splice@chr  | 4.72E-11 | 0.001106 |
| 29Nov2011 | 9780  | 943.58  | 7.64101  | 1 _SPLFVPKI chrX@4402    | 1.30E-10 | 0.004435 |
| 29Nov2011 | 11510 | 833.46  | -21.6039 | 2 R.RRVK+14 chr2@2138    | 1.44E-10 | 0.004636 |
| 29Nov2011 | 2471  | 833.47  | 7.710408 | 1 R.DMVQLV chrX@9811     | 3.44E-10 | 0.00765  |
| 29Nov2011 | 14467 | 791.9   | -15.2799 | 2 F.QFM+15. chr4@1546    | 4.23E-10 | 0.00967  |
| 29Nov2011 | 11532 | 719.39  | 28.86707 | 2 R.FTQAGSE Splice@chr   | 3.53E-14 | 0        |
| 29Nov2011 | 17972 | 1288.16 | -20.373  | 2 _CTAVSAS Splice@chr    | 9.96E-12 | 6.10E-04 |
| 29Nov2011 | 18009 | 1288.15 | -28.1526 | 2 _CTAVSAS Splice@chr    | 4.82E-12 | 6.10E-04 |
| 29Nov2011 | 17180 | 1123.08 | 8.408819 | 2 R.TFDDVLY Splice@chr   | 1.18E-10 | 0.002675 |
| 29Nov2011 | 3798  | 794.43  | -5.96418 | 2 R.TK+14.01 chr1@7238   | 1.45E-10 | 0.002781 |
| 29Nov2011 | 11483 | 719.39  | 28.86707 | 2 R.FTQAGSE Splice@chr   | 8.11E-13 | 1.75E-04 |
| 29Nov2011 | 9525  | 1335.08 | 1.28103  | 2 _IESSYDKE Splice@chr   | 1.82E-16 | 0        |
| 29Nov2011 | 5772  | 1025.62 | -1.90621 | 1 K.LGLGSL chr5@4945     | 5.65E-11 | 0.001679 |
| 29Nov2011 | 3692  | 794.43  | -5.96418 | 2 R.TK+14.01 chr1@7238   | 6.95E-11 | 0.002089 |
| 29Nov2011 | 464   | 552.34  | 10.07424 | 2 K.AEKMOK Splice@chr    | 3.26E-10 | 0.007424 |
| 29Nov2011 | 19030 | 918.45  | -21.8421 | 1 R.HMSKW7 chr3@9745     | 1.80E-10 | 0.003783 |

|           |       |         |          |                         |          |          |
|-----------|-------|---------|----------|-------------------------|----------|----------|
| 29Nov2011 | 9522  | 944.58  | 4.081799 | 1 _SPLFVPKf chrX@440    | 1.50E-10 | 0.002897 |
| 29Nov2011 | 17820 | 622.67  | 14.83462 | 3 S.LFGTIVCN chr5@1591  | 2.05E-10 | 0.004537 |
| 29Nov2011 | 10475 | 671.37  | -24.0361 | 2 T.FNIVHTQ Splice@chr  | 2.51E-10 | 0.005635 |
| 29Nov2011 | 2793  | 537.8   | -5.57144 | 2 K.DQGMLN chr5@202     | 4.22E-10 | 0.009552 |
| 29Nov2011 | 8787  | 1345.13 | -23.5213 | 2 _QVREMH Splice@chr    | 1.97E-10 | 0.004415 |
| 29Nov2011 | 15254 | 1216.59 | -11.6275 | 2 L.RNTRNDI chr4@101    | 1.00E-10 | 0.002575 |
| 29Nov2011 | 2906  | 433.76  | 2.609238 | 2 _IVDLPGPI chr3@110    | 1.01E-10 | 0.002575 |
| 29Nov2011 | 3746  | 794.43  | -5.96418 | 2 R.TK+14.01 chr1@723   | 8.09E-11 | 0.002197 |
| 29Nov2011 | 18452 | 962.81  | 26.56894 | 3 _CSIRPISG Splice@chr  | 2.97E-10 | 0.006452 |
| 29Nov2011 | 2967  | 876.41  | -8.50606 | 1 K.TEDEARR chrX@113    | 1.63E-10 | 0.003146 |
| 29Nov2011 | 17075 | 1122.59 | 18.82926 | 2 R.TFDDVLY Splice@chr  | 2.85E-10 | 0.006344 |
| 29Nov2011 | 12091 | 1040.03 | -27.4909 | 2 V.IFSKINKN chr5@172   | 2.03E-10 | 0.004537 |
| 29Nov2011 | 15368 | 1324.68 | 5.809954 | 1 R.MFTPLFE Splice@chr  | 7.51E-13 | 1.75E-04 |
| 29Nov2011 | 6826  | 639.65  | -12.525  | 3 R.NLM+15. chr1@540    | 4.90E-11 | 0.001283 |
| 29Nov2011 | 15195 | 1216.6  | -3.3897  | 2 L.RNTRNDI chr4@101    | 2.09E-10 | 0.004655 |
| 29Nov2011 | 4189  | 1073.56 | 20.18419 | 2 L.KIDDFEII chr4@168   | 6.54E-11 | 0.001817 |
| 29Nov2011 | 8730  | 1345.13 | -23.5213 | 2 _QVREMH Splice@chr    | 1.52E-10 | 0.002897 |
| 29Nov2011 | 13221 | 1034.57 | -2.45085 | 2 K.FK+14.01 Splice@chr | 1.47E-11 | 6.10E-04 |
| 29Nov2011 | 13400 | 1077.57 | -20.0495 | 2 V.K+14.01 chr4@124    | 6.15E-11 | 0.001679 |
| 29Nov2011 | 8670  | 1345.63 | -24.7692 | 2 _QVREMH Splice@chr    | 2.05E-10 | 0.004655 |
| 29Nov2011 | 56    | 722.35  | 3.723    | 1 R.FQGGGEI chr1@259    | 3.33E-10 | 0.007537 |
| 29Nov2011 | 13314 | 1077.57 | -20.0495 | 2 V.KK+14.01 chr4@124   | 6.10E-11 | 0.001679 |
| 29Nov2011 | 7405  | 769.43  | -13.279  | 1 _NNAKPPk chr3@245     | 3.63E-10 | 0.00863  |
| 29Nov2011 | 2754  | 815.93  | -18.3219 | 2 K.KNKKGQI chr5@821    | 7.32E-11 | 0.002197 |
| 29Nov2011 | 12074 | 1040.53 | -29.1053 | 2 V.IFSKINKN chr5@172   | 2.95E-10 | 0.006452 |
| 29Nov2011 | 11163 | 833.46  | -21.6039 | 2 R.RRVK+14 chr2@213    | 1.71E-10 | 0.003276 |
| 29Nov2011 | 9485  | 1335.58 | 0.02368  | 2 _IESSYDKE Splice@chr  | 8.82E-16 | 0        |
| 29Nov2011 | 17209 | 1122.58 | 9.904408 | 2 R.TFDDVLY Splice@chr  | 3.11E-10 | 0.006941 |
| 29Nov2011 | 7193  | 870.57  | 10.89471 | 1 _TPLAKLAI Splice@chr  | 3.39E-10 | 0.00765  |
| 29Nov2011 | 7620  | 625.82  | -20.2839 | 2 R.K+14.016 chrX@135   | 3.74E-10 | 0.008738 |
| 29Nov2011 | 3202  | 717.38  | -29.5402 | 2 R.RYPVNAC chr4@644    | 2.95E-10 | 0.006452 |
| 29Nov2011 | 17109 | 1123.09 | 17.33367 | 2 R.TFDDVLY Splice@chr  | 6.41E-11 | 0.001679 |
| 29Nov2011 | 13357 | 1077.57 | -20.0495 | 2 V.K+14.01 chr4@124    | 3.48E-11 | 8.63E-04 |
| 29Nov2011 | 6323  | 689.39  | -4.47925 | 2 R.NQSASSv chr4@526    | 2.50E-10 | 0.00551  |
| 29Nov2011 | 13233 | 620.36  | -19.2163 | 2 K.KMLISNH Splice@chr  | 1.26E-10 | 0.002675 |
| 29Nov2011 | 17151 | 1123.09 | 17.33367 | 2 R.TFDDVLY Splice@chr  | 4.12E-10 | 0.009429 |
| 29Nov2011 | 17155 | 1122.58 | 9.904408 | 2 R.TFDDVLY Splice@chr  | 3.49E-10 | 0.008016 |
| 29Nov2011 | 3075  | 876.41  | -8.50606 | 1 K.TEDEARR chrX@113    | 4.26E-11 | 0.001001 |
| 29Nov2011 | 1085  | 545.81  | -0.83904 | 2 K.FPVAAK+ chr3@103    | 6.06E-11 | 0.00341  |
| 29Nov2011 | 14599 | 792.15  | -18.5783 | 4 K.SGTIFDNI Splice@chr | 1.00E-17 | 0        |
| 29Nov2011 | 14012 | 1019.83 | -9.02599 | 3 R.QQSPENI Splice@chr  | 1.10E-11 | 0.001347 |
| 29Nov2011 | 10123 | 1049.53 | 15.08228 | 3 G.DQSVDSI chr4@916    | 3.44E-11 | 0.001664 |
| 29Nov2011 | 3043  | 571.36  | -11.2978 | 2 R.TKK+14.C chrX@124   | 9.75E-11 | 0.004917 |
| 29Nov2011 | 2011  | 815.93  | -18.3219 | 2 K.KNKKGQI chr5@821    | 9.53E-11 | 0.004917 |
| 29Nov2011 | 13895 | 1003.53 | 22.67704 | 3 R.CWNRRA Splice@chr   | 3.47E-11 | 0.001664 |
| 29Nov2011 | 4347  | 867.43  | 14.79368 | 1 K.SSSGSLSS chr2@113   | 2.22E-10 | 0.00791  |
| 29Nov2011 | 4847  | 717.9   | -3.32039 | 2 K.LRGWNK chr3@888     | 1.47E-10 | 0.006362 |

|           |       |         |          |                          |          |          |
|-----------|-------|---------|----------|--------------------------|----------|----------|
| 29Nov2011 | 2203  | 876.41  | -8.50606 | 1 K.TEDEARR chrX@1138    | 4.26E-11 | 0.001851 |
| 29Nov2011 | 5118  | 566.31  | 21.45326 | 2 R.EVAQLEC chr5@1706    | 1.68E-10 | 0.006699 |
| 29Nov2011 | 13281 | 858.46  | -3.52431 | 2 R.RM+15.9 chr1@1195    | 3.28E-11 | 0.001664 |
| 29Nov2011 | 14614 | 792.15  | -18.5783 | 4 K.SGTIFDNI Splice@chr  | 3.00E-17 | 0        |
| 29Nov2011 | 2760  | 541.8   | -25.5845 | 2 K.RCLHALR Splice@chr   | 2.69E-10 | 0.009503 |
| 29Nov2011 | 5033  | 871.03  | 10.03674 | 3 R.KCDQCEL chr4@5179    | 6.88E-19 | 0        |
| 29Nov2011 | 5073  | 566.31  | 21.45326 | 2 R.EVAQLEC chr5@1706    | 2.01E-10 | 0.0072   |
| 29Nov2011 | 10740 | 1090.54 | -8.93818 | 2 K.INGVTVA chr3@6296    | 1.94E-10 | 0.0072   |
| 29Nov2011 | 7725  | 618.83  | -6.67202 | 2 _QIMNNFI Splice@chr    | 1.23E-10 | 0.005804 |
| 29Nov2011 | 4370  | 1386.65 | -29.1469 | 2 R.KRLIFGYF chr3@1281   | 2.86E-10 | 0.009853 |
| 29Nov2011 | 3760  | 517.76  | -12.8742 | 4 K.DLEKSSM Splice@chr   | 1.92E-10 | 0.007036 |
| 29Nov2011 | 10122 | 762.43  | 16.40509 | 2 _MK+14.0 chr4@7749     | 1.30E-10 | 0.005804 |
| 29Nov2011 | 11061 | 639.37  | -20.365  | 2 R.SPIK+14.1 Splice@chr | 3.35E-11 | 0.001664 |
| 29Nov2011 | 9165  | 1115.1  | 6.276672 | 2 S.LYSSCPE chrX@1175    | 2.93E-10 | 0.009853 |
| 29Nov2011 | 12592 | 791.9   | -17.5179 | 4 K.SGTIFDNI Splice@chr  | 6.35E-14 | 0        |
| 29Nov2011 | 11968 | 1003.19 | 17.13413 | 3 R.CWNRRA Splice@chr    | 1.36E-10 | 0.00611  |
| 29Nov2011 | 11386 | 857.95  | -13.2476 | 2 R.RM+15.9 chr1@1195    | 6.24E-11 | 0.003342 |
| 29Nov2011 | 12624 | 792.15  | -18.5783 | 4 K.SGTIFDNI Splice@chr  | 5.44E-12 | 5.56E-04 |
| 29Nov2011 | 12612 | 792.15  | -18.5783 | 4 K.SGTIFDNI Splice@chr  | 2.59E-13 | 0        |
| 29Nov2011 | 6141  | 750.91  | -11.069  | 2 K.SKTSRFRI chr1@2447   | 9.75E-11 | 0.005276 |
| 29Nov2011 | 2524  | 553.79  | -7.72895 | 2 _SSLDKESC chr5@1239    | 1.35E-10 | 0.00611  |
| 29Nov2011 | 4331  | 566.31  | 21.45326 | 2 R.EVAQLEC chr5@1706    | 9.34E-11 | 0.004901 |
| 29Nov2011 | 11946 | 1003.19 | 17.13413 | 3 R.CWNRRA Splice@chr    | 1.42E-10 | 0.00611  |
| 29Nov2011 | 12082 | 823.75  | -25.3212 | 3 R.IFNFPGF chr4@1095    | 3.24E-11 | 0.001488 |
| 29Nov2011 | 1877  | 537.3   | 7.397674 | 2 K.IAENSVEI chr3@1076   | 5.83E-11 | 0.002882 |
| 29Nov2011 | 10036 | 858.46  | -3.52431 | 2 R.RM+15.9 chr1@1195    | 1.95E-10 | 0.007797 |
| 29Nov2011 | 3863  | 752.88  | -14.2545 | 2 R.GKCNGG chr4@5126     | 1.83E-10 | 0.007581 |
| 29Nov2011 | 6107  | 1345.63 | -24.7692 | 2 _QVREMH Splice@chr     | 1.20E-10 | 0.005497 |
| 29Nov2011 | 11416 | 858.45  | -15.2049 | 2 R.RM+15.9 chr1@1195    | 6.06E-11 | 0.003342 |
| 29Nov2011 | 5370  | 625.82  | -11.1921 | 2 I.QLEDIEFIS Splice@chr | 2.09E-10 | 0.009105 |
| 31Mar2011 | 2933  | 476.73  | -8.21113 | 2 R.SSHEISHF chr5@1494   | 1.19E-10 | 0.004596 |
| 31Mar2011 | 3599  | 509.3   | -20.473  | 2 R.SSVIMLIV chr2@5767   | 5.12E-11 | 0.002764 |
| 31Mar2011 | 3645  | 509.3   | -20.473  | 2 R.SSVIMLIV chr2@5767   | 9.32E-11 | 0.003992 |
| 31Mar2011 | 5420  | 881.47  | 19.52679 | 2 A.HRK+14.1 chr5@1438   | 1.53E-10 | 0.00842  |
| 31Mar2011 | 2878  | 476.73  | -8.21113 | 2 R.SSHEISHF chr5@1494   | 7.72E-11 | 0.003376 |
| 31Mar2011 | 3557  | 509.8   | -23.773  | 2 R.SSVIMLIV chr2@5767   | 3.76E-11 | 0.002146 |
| 31Mar2011 | 239   | 452.23  | -1.48793 | 2 R.SGEPLSA Splice@chr   | 3.99E-11 | 0.002764 |
| 31Mar2011 | 3746  | 509.3   | -20.473  | 2 R.SSVIMLIV chr2@5767   | 1.09E-10 | 0.004596 |
| 31Mar2011 | 5685  | 945.95  | -25.2346 | 2 K.FSKKNMI chr4@1701    | 1.29E-10 | 0.00589  |
| 31Mar2011 | 8345  | 634.84  | 6.410455 | 2 R.VDIGDILF Splice@chr  | 2.05E-12 | 0        |
| 31Mar2011 | 3118  | 476.73  | -8.21113 | 2 R.SSHEISHF chr5@1494   | 1.07E-10 | 0.003992 |
| 31Mar2011 | 4972  | 748.73  | -12.625  | 3 R.LPSKENL chr4@5639    | 1.45E-10 | 0.007792 |
| 31Mar2011 | 3695  | 509.3   | -20.473  | 2 R.SSVIMLIV chr2@5767   | 1.33E-10 | 0.006527 |
| 31Mar2011 | 234   | 452.23  | -1.48793 | 2 R.SGEPLSA Splice@chr   | 8.79E-11 | 0.003376 |
| 31Mar2011 | 3028  | 476.73  | -8.21113 | 2 R.SSHEISHF chr5@1494   | 1.03E-10 | 0.003992 |
| 31Mar2011 | 3564  | 1017.59 | -22.5744 | 1 R.SSVIMLIV chr2@5767   | 1.88E-11 | 0        |
| 31Mar2011 | 220   | 452.23  | -1.48793 | 2 R.SGEPLSA Splice@chr   | 1.42E-10 | 0.007792 |

|           |       |         |          |                          |          |          |
|-----------|-------|---------|----------|--------------------------|----------|----------|
| 31Mar2011 | 226   | 452.23  | -1.48793 | 2 R.SGEPLSA: Splice@chr  | 3.50E-11 | 0.001433 |
| 31Mar2011 | 538   | 493.61  | 28.00299 | 3 _..FQRHNLN chrX@1408   | 5.18E-11 | 8.78E-04 |
| 31Mar2011 | 4514  | 767.41  | -10.114  | 2 K.QLDFLVD chr4@1395    | 3.31E-10 | 0.006369 |
| 31Mar2011 | 2766  | 830.39  | -18.1496 | 2 R.FEVFEIEC chr4@7295   | 6.09E-10 | 0.008894 |
| 31Mar2011 | 4440  | 833.93  | -9.2006  | 2 _..IIEPYVAV Splice@chr | 4.08E-10 | 0.007137 |
| 31Mar2011 | 528   | 493.61  | 28.00299 | 3 _..FQRHNLN chrX@1408   | 2.07E-10 | 0.004439 |
| 31Mar2011 | 6481  | 809.01  | -7.47824 | 2 R.FTTELLLL chr3@8986   | 1.42E-10 | 0.002489 |
| 31Mar2011 | 3967  | 742.38  | -26.3192 | 2 R.ETFISVEK chr5@7445   | 6.27E-10 | 0.008894 |
| 31Mar2011 | 3617  | 671.37  | -24.0361 | 2 T.FNIVHTQ Splice@chr   | 4.67E-10 | 0.007451 |
| 31Mar2011 | 4418  | 607     | -9.70672 | 3 I.NRFNISLK chrX@1250   | 1.16E-10 | 0.002081 |
| 31Mar2011 | 4736  | 753.96  | 0.162122 | 2 K.K+14.016 chr2@1375   | 2.45E-11 | 4.45E-04 |
| 31Mar2011 | 3014  | 586.34  | 11.36604 | 2 R.LVILFFLF chr2@6458   | 4.72E-10 | 0.007451 |
| 31Mar2011 | 1407  | 474.78  | -7.40756 | 2 R.IYIPAMLk chr2@2768   | 1.49E-10 | 0.002489 |
| 31Mar2011 | 4472  | 833.93  | -9.2006  | 2 _..IIEPYVAV Splice@chr | 6.28E-10 | 0.008894 |
| 31Mar2011 | 2859  | 829.89  | -16.1259 | 2 R.FEVFEIEC chr4@7295   | 6.80E-10 | 0.009227 |
| 31Mar2011 | 3593  | 671.37  | -24.0361 | 2 T.FNIVHTQ Splice@chr   | 3.30E-10 | 0.00601  |
| 31Mar2011 | 2646  | 771.39  | 2.218364 | 2 R.NFFKTPA chr3@1244    | 6.90E-10 | 0.009227 |
| 31Mar2011 | 6342  | 1116.22 | 16.71106 | 3 K.QAFDDAI Splice@chr   | 6.21E-11 | 0.001289 |
| 31Mar2011 | 5088  | 785.42  | 22.95449 | 1 _..MPAWAF chr2@1115    | 5.71E-11 | 0.001289 |
| 31Mar2011 | 4841  | 833.42  | -19.2103 | 2 _..IIEPYVAV Splice@chr | 8.41E-11 | 0.001703 |
| 31Mar2011 | 969   | 430.98  | 28.39109 | 4 K.YVITNGIN chr4@8395   | 7.83E-11 | 0.001703 |
| 31Mar2011 | 6145  | 634.84  | 6.410455 | 2 R.VDIGDILF Splice@chr  | 3.18E-11 | 4.45E-04 |
| 31Mar2011 | 4837  | 622.33  | 9.587405 | 2 R.AK+14.01 chr2@4270   | 6.99E-10 | 0.009227 |
| 31Mar2011 | 5544  | 819.93  | 4.811536 | 2 R.RAPCIYPI chr3@4428   | 5.80E-10 | 0.008564 |
| 31Mar2011 | 6125  | 634.84  | 6.410455 | 2 R.VDIGDILF Splice@chr  | 7.35E-12 | 0        |
| 31Mar2011 | 4808  | 622.33  | 9.587405 | 2 R.AK+14.01 chr2@4270   | 4.49E-10 | 0.007451 |
| 31Mar2011 | 5109  | 785.42  | 22.95449 | 1 _..MPAWAF chr2@1115    | 1.74E-11 | 0        |
| 31Mar2011 | 8048  | 762.43  | 16.40509 | 2 _..MK+14.0 chr4@7745   | 5.93E-10 | 0.009646 |
| 31Mar2011 | 1010  | 464.24  | -7.11495 | 2 K.ETSFSTKk chr4@8236   | 1.54E-10 | 0.002208 |
| 31Mar2011 | 992   | 444.59  | 14.03499 | 3 K.KM+15.9 chr4@1484    | 6.21E-10 | 0.009814 |
| 31Mar2011 | 2750  | 423.26  | 23.30279 | 2 K.LGAETVV chr2@6180    | 5.41E-10 | 0.009055 |
| 31Mar2011 | 7709  | 692.35  | -25.4254 | 2 K.KDKNAAt chr3@8925    | 4.04E-10 | 0.006002 |
| 31Mar2011 | 10677 | 968.49  | -26.7355 | 3 R.NYSPK+1 Splice@chr   | 5.37E-10 | 0.009055 |
| 31Mar2011 | 6211  | 657.04  | -26.9179 | 3 R.GNVRK+1 chrX@7490    | 1.10E-13 | 0        |
| 31Mar2011 | 8324  | 753.96  | 0.162122 | 2 K.K+14.016 chr2@1375   | 3.45E-11 | 7.20E-04 |
| 31Mar2011 | 7169  | 616.64  | -9.1871  | 3 R.MSQEVA Splice@chr    | 1.25E-10 | 0.001812 |
| 31Mar2011 | 5263  | 711.93  | 27.67758 | 4 R.SLRTKISA chr3@9317   | 3.50E-10 | 0.004748 |
| 31Mar2011 | 10792 | 634.84  | 6.410455 | 2 R.VDIGDILF Splice@chr  | 7.31E-13 | 0        |
| 31Mar2011 | 9736  | 819.42  | -5.36955 | 2 R.RAPCIYPI chr3@4428   | 4.80E-10 | 0.007637 |
| 31Mar2011 | 2430  | 936.48  | 27.86052 | 1 K.LNGGYEC chr2@1191    | 4.63E-10 | 0.007431 |
| 31Mar2011 | 6257  | 657.04  | -26.9179 | 3 R.GNVRK+1 chrX@7490    | 2.18E-11 | 4.96E-04 |
| 31Mar2011 | 5753  | 586.34  | 11.36604 | 2 R.LVILFFLF chr2@6458   | 3.78E-10 | 0.005798 |
| 31Mar2011 | 8049  | 858.48  | 6.006088 | 3 _..LETGIIPt Splice@chr | 4.59E-11 | 7.20E-04 |
| 31Mar2011 | 9898  | 1039.04 | 7.526316 | 2 R.NSVANIG Splice@chr   | 1.42E-21 | 0        |
| 31Mar2011 | 514   | 549.29  | -19.7752 | 2 K.FRVQYQC Splice@chr   | 3.33E-10 | 0.00454  |
| 31Mar2011 | 6538  | 730.38  | -23.8587 | 3 K.DNVVNTI chr3@7825    | 5.53E-10 | 0.009055 |
| 31Mar2011 | 532   | 527.27  | -26.7558 | 2 K.VFPFAWt chr5@1762    | 1.47E-10 | 0.002208 |

|           |       |         |          |                         |          |          |
|-----------|-------|---------|----------|-------------------------|----------|----------|
| 31Mar2011 | 4534  | 1116.65 | 11.05125 | 1 K.INLKVNSI chr2@7016  | 4.60E-10 | 0.007431 |
| 31Mar2011 | 5664  | 895.94  | 2.728042 | 2 K.IIGGFEDC chr4@2100  | 9.97E-20 | 0        |
| 31Mar2011 | 7985  | 648.86  | -13.0566 | 2 R.QM+15.9 chr3@9694   | 4.63E-10 | 0.007431 |
| 31Mar2011 | 8282  | 753.96  | 0.162122 | 2 K.K+14.016 chr2@1375  | 1.70E-10 | 0.002208 |
| 31Mar2011 | 8147  | 938.46  | 22.50833 | 2 R.ECSQSDS chr2@8876   | 3.93E-10 | 0.005798 |
| 31Mar2011 | 7886  | 606.66  | -18.8783 | 3 I.NRFNISK chrX@1250   | 1.33E-10 | 0.002026 |
| 31Mar2011 | 10955 | 491.64  | 23.22207 | 3 R.LLLDKPLF Splice@chr | 5.06E-11 | 9.52E-04 |
| 31Mar2011 | 5602  | 897.42  | -27.6753 | 3 _QVREMH Splice@chr    | 5.26E-10 | 0.008655 |
| 31Mar2011 | 3755  | 677.95  | 22.60469 | 2 R.QLKVIGR chrX@3498   | 1.21E-10 | 0.001812 |
| 31Mar2011 | 2991  | 583.79  | -23.2497 | 2 R.YLAAAAC chr5@9265   | 2.82E-10 | 0.00349  |
| 31Mar2011 | 6695  | 671.37  | -24.0361 | 2 T.FNIVHTQ Splice@chr  | 1.48E-10 | 0.002208 |
| 31Mar2011 | 8883  | 785.42  | 22.95449 | 1 _MPAWAF chr2@1115     | 2.85E-11 | 4.96E-04 |
| 31Mar2011 | 8237  | 833.42  | -19.2103 | 2 _IIEPYVAV Splice@chr  | 6.59E-11 | 0.001622 |
| 31Mar2011 | 8927  | 785.42  | 22.95449 | 1 _MPAWAF chr2@1115     | 1.74E-11 | 2.54E-04 |
| 31Mar2011 | 9484  | 737.36  | 7.484025 | 4 R.NAEAAAF Splice@chr  | 2.26E-18 | 0        |
| 31Mar2011 | 7517  | 724.06  | 2.506414 | 3 R.NELEVFK chr1@1385   | 2.52E-10 | 0.008907 |
| 31Mar2011 | 11220 | 1003.18 | 7.145987 | 3 R.CWNRRA Splice@chr   | 4.06E-14 | 0        |
| 31Mar2011 | 5808  | 509.3   | -20.473  | 2 R.SSVIMLIV chr2@5767  | 6.52E-11 | 0.001245 |
| 31Mar2011 | 2605  | 936.48  | 27.86052 | 1 K.LNGGYEC chr2@1191   | 4.48E-11 | 6.50E-04 |
| 31Mar2011 | 11753 | 634.84  | 6.410455 | 2 R.VDIGDILF Splice@chr | 2.45E-12 | 0        |
| 31Mar2011 | 9063  | 753.96  | 0.162122 | 2 K.K+14.016 chr2@1375  | 3.25E-11 | 6.50E-04 |
| 31Mar2011 | 5721  | 1017.59 | -22.5744 | 1 R.SSVIMLIV chr2@5767  | 4.21E-11 | 6.50E-04 |
| 31Mar2011 | 267   | 452.23  | -1.48793 | 2 R.SGEPLSA Splice@chr  | 1.04E-10 | 0.001245 |
| 31Mar2011 | 5760  | 509.3   | -20.473  | 2 R.SSVIMLIV chr2@5767  | 7.94E-11 | 0.001245 |
| 31Mar2011 | 9026  | 753.96  | 0.162122 | 2 K.K+14.016 chr2@1375  | 4.78E-11 | 6.50E-04 |
| 31Mar2011 | 8577  | 607     | -9.70672 | 3 I.NRFNISK chrX@1250   | 1.22E-10 | 0.003092 |
| 31Mar2011 | 8618  | 607     | -9.70672 | 3 I.NRFNISK chrX@1250   | 9.90E-11 | 0.001245 |
| 31Mar2011 | 8562  | 962.48  | 13.7521  | 2 R.AYFHVTN chr1@1005   | 2.83E-11 | 6.50E-04 |
| 31Mar2011 | 1822  | 626.82  | -18.5922 | 2 W.QFDLGK Splice@chr   | 2.06E-10 | 0.006295 |
| 31Mar2011 | 5615  | 509.3   | -20.473  | 2 R.SSVIMLIV chr2@5767  | 5.96E-11 | 0.001245 |
| 31Mar2011 | 5710  | 509.3   | -20.473  | 2 R.SSVIMLIV chr2@5767  | 1.33E-10 | 0.003384 |
| 31Mar2011 | 1599  | 493.61  | 28.00299 | 3 _FQRHNLN chrX@1408    | 1.93E-10 | 0.006295 |
| 31Mar2011 | 1861  | 626.82  | -18.5922 | 2 W.QFDLGK Splice@chr   | 1.46E-10 | 0.00428  |
| 31Mar2011 | 275   | 452.23  | -1.48793 | 2 R.SGEPLSA Splice@chr  | 1.20E-10 | 0.002786 |
| 31Mar2011 | 5770  | 1017.59 | -22.5744 | 1 R.SSVIMLIV chr2@5767  | 6.88E-11 | 0.001245 |
| 31Mar2011 | 3243  | 583.79  | -23.2497 | 2 R.YLAAAAC chr5@9265   | 2.04E-10 | 0.006295 |
| 31Mar2011 | 1907  | 626.82  | -18.5922 | 2 W.QFDLGK Splice@chr   | 1.76E-10 | 0.006019 |
| 31Mar2011 | 726   | 420.68  | -22.1784 | 2 R.MMTGTG chrX@9534    | 2.89E-11 | 6.50E-04 |
| 31Mar2011 | 5661  | 509.3   | -20.473  | 2 R.SSVIMLIV chr2@5767  | 7.33E-11 | 0.001245 |
| 31Mar2011 | 1007  | 464.24  | -7.11495 | 2 K.ETSFSTK chr4@8236   | 1.52E-10 | 0.00428  |
| 31Mar2011 | 5640  | 771.39  | 2.218364 | 2 R.NFFKTPA chr3@1244   | 8.00E-11 | 0.001245 |
| 31Mar2011 | 5624  | 1017.59 | -22.5744 | 1 R.SSVIMLIV chr2@5767  | 1.88E-11 | 3.44E-04 |
| 31Mar2011 | 10491 | 742.88  | -6.21424 | 2 K.M+15.99 chr4@1648   | 1.49E-10 | 0.00428  |
| 31Mar2011 | 9674  | 785.42  | 22.95449 | 1 _MPAWAF chr2@1115     | 2.85E-11 | 6.50E-04 |
| 31Mar2011 | 2974  | 423.26  | 23.30279 | 2 K.LGAETVV chr2@6180   | 1.95E-10 | 0.006295 |
| 31Mar2011 | 9300  | 1182.57 | -12.6646 | 1 R.RFAENQI chr5@1775   | 1.92E-10 | 0.006019 |
| 31Mar2011 | 5779  | 640.82  | -29.3809 | 4 K.SIQARKRI chr4@9242  | 3.62E-10 | 0.004676 |

|           |       |         |          |                          |          |          |
|-----------|-------|---------|----------|--------------------------|----------|----------|
| 31Mar2011 | 12449 | 860.69  | 14.08015 | 4 R.FQSAAIG Splice@chr   | 9.30E-15 | 0        |
| 31Mar2011 | 1484  | 493.61  | 28.00299 | 3 _..FQRHNLN chrX@1408   | 1.71E-10 | 0.002065 |
| 31Mar2011 | 935   | 464.24  | -7.11495 | 2 K.ETSFSTKk chr4@8236   | 4.06E-10 | 0.005551 |
| 31Mar2011 | 9431  | 888.47  | 22.8338  | 2 K.DITLEVEA Splice@chr  | 3.77E-11 | 8.17E-04 |
| 31Mar2011 | 8392  | 858.48  | 6.006088 | 3 _..LETGIKPI Splice@chr | 2.41E-13 | 0        |
| 31Mar2011 | 11723 | 634.84  | 6.410455 | 2 R.VDIGDILF Splice@chr  | 1.52E-12 | 0        |
| 31Mar2011 | 12443 | 1147.25 | 13.44098 | 3 R.FQSAAIG Splice@chr   | 2.02E-15 | 0        |
| 31Mar2011 | 8857  | 753.96  | 0.162122 | 2 K.K+14.016 chr2@1375   | 8.80E-11 | 0.001693 |
| 31Mar2011 | 10170 | 780.12  | -1.54042 | 3 L.SQK+14.0 chrX@3940   | 2.82E-10 | 0.003638 |
| 31Mar2011 | 12849 | 809.02  | 4.909957 | 2 R.FTTELLLL chr3@8986   | 1.53E-10 | 0.001693 |
| 31Mar2011 | 10963 | 889.95  | -19.8868 | 2 K.RSSVHTE chr2@8442    | 6.62E-10 | 0.008685 |
| 31Mar2011 | 3209  | 434.24  | 13.9946  | 3 _..RSNDQTI chr5@6378   | 2.23E-10 | 0.002591 |
| 31Mar2011 | 6076  | 1075.05 | -16.1169 | 2 R.TCSK+14. chr2@1253   | 9.32E-11 | 0.001693 |
| 31Mar2011 | 7607  | 889.45  | 21.89471 | 2 K.IEGKWYS chr4@1172    | 6.02E-10 | 0.007851 |
| 31Mar2011 | 8384  | 833.93  | -9.2006  | 2 _..IIEPYVAV Splice@chr | 5.68E-10 | 0.007521 |
| 31Mar2011 | 6759  | 538.63  | 15.21298 | 3 R.TNIVSPEI Splice@chr  | 6.83E-10 | 0.0097   |
| 31Mar2011 | 5414  | 509.8   | -23.773  | 2 R.SSVIMLIV chr2@5767   | 6.64E-11 | 0.001569 |
| 31Mar2011 | 9500  | 785.42  | 22.95449 | 1 _..MPAWAF chr2@1115    | 2.29E-11 | 2.09E-04 |
| 31Mar2011 | 2434  | 519.6   | -26.5197 | 3 K.IGSM+15 chr5@1654    | 5.24E-10 | 0.007376 |
| 31Mar2011 | 7135  | 748.72  | -26.0118 | 3 R.LPSKENL\ chr4@5639   | 2.13E-10 | 0.002591 |
| 31Mar2011 | 941   | 562.31  | -13.4391 | 2 R.FYLLLYLK Splice@chr  | 4.72E-11 | 0.001004 |
| 31Mar2011 | 13265 | 1016.61 | 1.445883 | 1 K.RDIVFIPR chr3@3677   | 5.60E-10 | 0.007521 |
| 31Mar2011 | 8770  | 753.96  | 0.162122 | 2 K.K+14.016 chr2@1375   | 6.02E-11 | 0.001569 |
| 31Mar2011 | 8812  | 753.96  | 0.162122 | 2 K.K+14.016 chr2@1375   | 2.87E-11 | 4.17E-04 |
| 31Mar2011 | 906   | 464.24  | -7.11495 | 2 K.ETSFSTKk chr4@8236   | 1.35E-10 | 0.001693 |
| 31Mar2011 | 3856  | 1025.61 | -11.6755 | 1 K.LGLGSGL chr5@4945    | 3.24E-12 | 0        |
| 31Mar2011 | 8276  | 607     | -9.70672 | 3 I.NRFNISK chrX@1250    | 4.88E-10 | 0.006681 |
| 31Mar2011 | 12864 | 809.02  | 4.909957 | 2 R.FTTELLLL chr3@8986   | 6.13E-10 | 0.007851 |
| 31Mar2011 | 8686  | 833.42  | -19.2103 | 2 _..IIEPYVAV Splice@chr | 6.23E-11 | 0.001569 |
| 31Mar2011 | 1082  | 514.3   | -22.3544 | 2 R.PLESSILLI chr4@4365  | 2.81E-10 | 0.003638 |
| 31Mar2011 | 8927  | 833.42  | -19.2103 | 2 _..IIEPYVAV Splice@chr | 1.75E-10 | 0.00225  |
| 31Mar2011 | 1696  | 917.53  | -12.9857 | 1 K.VISSLDRK chr5@9012   | 6.46E-10 | 0.008354 |
| 31Mar2011 | 8625  | 664.7   | 1.197202 | 3 _..PTLNK+1. chr1@6526  | 5.23E-11 | 0.001004 |
| 31Mar2011 | 8943  | 622.33  | 9.587405 | 2 R.AK+14.01 chr2@4270   | 3.29E-10 | 0.004153 |
| 31Mar2011 | 11869 | 1062.91 | -28.6503 | 3 C.FTKPQK+ chr3@8434    | 1.02E-10 | 0.001693 |
| 31Mar2011 | 10322 | 742.88  | -6.21424 | 2 K.M+15.99 chr4@1648    | 5.08E-10 | 0.006681 |
| 31Mar2011 | 6939  | 671.37  | -24.0361 | 2 T.FNIVHTQ Splice@chr   | 6.27E-10 | 0.00819  |
| 31Mar2011 | 5467  | 509.8   | -23.773  | 2 R.SSVIMLIV chr2@5767   | 2.66E-11 | 2.09E-04 |
| 31Mar2011 | 11373 | 1007.86 | 15.19559 | 3 R.CWNRRA Splice@chr    | 9.29E-11 | 0.001693 |
| 31Mar2011 | 8439  | 858.48  | 6.006088 | 3 _..LETGIKPI Splice@chr | 2.65E-11 | 2.09E-04 |
| 31Mar2011 | 8501  | 762.43  | 16.40509 | 2 _..MK+14.0 chr4@7749   | 6.61E-10 | 0.008685 |
| 31Mar2011 | 11955 | 491.64  | 23.22207 | 3 R.LLLDKPLF Splice@chr  | 8.44E-11 | 0.001693 |
| 31Mar2011 | 7124  | 580.63  | 1.053017 | 3 K.MPNFRTI chr5@2689    | 1.25E-10 | 0.001693 |
| 31Mar2011 | 9074  | 514.52  | 26.86268 | 4 K.LSCFKHG chrX@1464    | 5.52E-10 | 0.007521 |
| 31Mar2011 | 9973  | 835.45  | -7.2977  | 4 R.K+14.016 chrX@9996   | 5.11E-10 | 0.006681 |
| 31Mar2011 | 6556  | 827.77  | -14.6467 | 3 K.NNRKHTI chr5@2125    | 2.37E-10 | 0.002758 |
| 31Mar2011 | 11692 | 634.84  | 6.410455 | 2 R.VDIGDILF Splice@chr  | 5.66E-13 | 0        |

|           |       |         |          |                         |          |          |
|-----------|-------|---------|----------|-------------------------|----------|----------|
| 31Mar2011 | 7498  | 671.37  | -24.0361 | 2 T.FNIVHTQ Splice@chr  | 3.10E-10 | 0.003051 |
| 31Mar2011 | 1453  | 510.3   | 12.8833  | 2 R.RHVAYVF chr1@1479   | 1.31E-11 | 4.56E-04 |
| 31Mar2011 | 3324  | 422.24  | -14.1272 | 2 R.KVHGFA chr4@4031    | 3.48E-10 | 0.003222 |
| 31Mar2011 | 4275  | 681.35  | -28.0792 | 2 R.RFQERRV chr4@1682   | 3.05E-10 | 0.003051 |
| 31Mar2011 | 1132  | 562.31  | -13.4391 | 2 R.FYLLYLYK Splice@chr | 6.51E-11 | 8.12E-04 |
| 31Mar2011 | 8951  | 938.46  | 22.50833 | 2 R.ECSQSDS chr2@8876   | 5.54E-10 | 0.00629  |
| 31Mar2011 | 9583  | 762.4   | -4.35645 | 3 R.NLNIMG chr5@2841    | 2.76E-10 | 0.002688 |
| 31Mar2011 | 2579  | 741.39  | -17.2291 | 2 K.QKSNWH chr5@1229    | 1.39E-10 | 0.0012   |
| 31Mar2011 | 2771  | 936.48  | 27.86052 | 1 K.LNGGYEC chr2@1191   | 4.19E-11 | 6.40E-04 |
| 31Mar2011 | 8618  | 833.93  | -9.2006  | 2 _IIEPYVAV Splice@chr  | 4.48E-10 | 0.004311 |
| 31Mar2011 | 5175  | 975.55  | -13.0268 | 1 K.LPKLDAYI chr4@1149  | 3.81E-11 | 6.40E-04 |
| 31Mar2011 | 9239  | 833.42  | -19.2103 | 2 _IIEPYVAV Splice@chr  | 8.99E-11 | 8.12E-04 |
| 31Mar2011 | 7549  | 671.37  | -24.0361 | 2 T.FNIVHTQ Splice@chr  | 7.24E-10 | 0.009305 |
| 31Mar2011 | 4833  | 450.59  | 14.30023 | 3 R.ISSLSVVE chrX@1634  | 3.08E-10 | 0.003051 |
| 31Mar2011 | 8497  | 829.42  | 16.87238 | 2 R.MVDQIKI chr5@1875   | 2.11E-10 | 0.00176  |
| 31Mar2011 | 12805 | 860.69  | 14.08015 | 4 R.FQSAAIG Splice@chr  | 2.23E-12 | 2.60E-04 |
| 31Mar2011 | 1727  | 418.89  | -10.5715 | 3 R.ENFATKC chr5@5231   | 3.89E-10 | 0.003976 |
| 31Mar2011 | 10800 | 928.01  | 17.71166 | 2 R.K+14.016 chr5@2010  | 7.56E-10 | 0.009638 |
| 31Mar2011 | 8783  | 858.48  | 6.006088 | 3 _LETGIKPI Splice@chr  | 3.97E-13 | 0        |
| 31Mar2011 | 9787  | 918.53  | -15.8984 | 1 K.SSLMVIR chr4@1212   | 5.76E-10 | 0.00629  |
| 31Mar2011 | 8080  | 701.36  | 28.23715 | 3 K.NNPYMS Splice@chr   | 7.40E-11 | 8.12E-04 |
| 31Mar2011 | 3913  | 493.78  | -11.3951 | 2 R.KNQENLI Splice@chr  | 2.46E-10 | 0.002133 |
| 31Mar2011 | 12037 | 634.83  | -9.39461 | 2 R.VDIGDILF Splice@chr | 7.47E-13 | 0        |
| 31Mar2011 | 3544  | 693.87  | -6.6949  | 2 V.ICVAVGD chr5@1063   | 3.28E-10 | 0.003051 |
| 31Mar2011 | 8632  | 855.41  | -22.1447 | 2 _HVQEVAI Splice@chr   | 4.01E-12 | 4.56E-04 |
| 31Mar2011 | 8516  | 501.3   | -0.81333 | 3 K.FLVK+14. chrX@8948  | 4.87E-10 | 0.005227 |
| 31Mar2011 | 10926 | 931.53  | 0.362106 | 2 R.CTLIYSQ chr4@2818   | 4.11E-10 | 0.004141 |
| 31Mar2011 | 7332  | 751.88  | -20.0772 | 2 K.ILNSCELP chr1@3164  | 1.07E-10 | 8.12E-04 |
| 31Mar2011 | 9079  | 753.96  | 0.162122 | 2 K.K+14.016 chr2@1375  | 2.26E-10 | 0.00176  |
| 31Mar2011 | 1420  | 510.3   | 12.8833  | 2 R.RHVAYVF chr1@1479   | 6.54E-12 | 4.56E-04 |
| 31Mar2011 | 11267 | 1028.99 | -16.6017 | 2 R.SQMDILC chrX@1399   | 5.58E-10 | 0.00629  |
| 31Mar2011 | 9715  | 792.67  | 25.51992 | 4 I.SRVEDDS Splice@chr  | 3.97E-10 | 0.004141 |
| 31Mar2011 | 12267 | 491.64  | 23.22207 | 3 R.LLLDKPLF Splice@chr | 4.06E-10 | 0.004141 |
| 31Mar2011 | 10635 | 742.88  | -6.21424 | 2 K.M+15.99 chr4@1648   | 4.18E-10 | 0.004141 |
| 31Mar2011 | 11903 | 968.49  | -26.7355 | 3 R.NYSPK+1 Splice@chr  | 2.80E-10 | 0.002688 |
| 31Mar2011 | 9532  | 965.52  | 3.100771 | 4 R.FPHFRAS chr1@4387   | 6.83E-10 | 0.008062 |
| 31Mar2011 | 6478  | 1075.06 | -6.79295 | 2 R.TCSK+14. chr2@1253  | 5.28E-10 | 0.005949 |
| 31Mar2011 | 13327 | 1105.21 | -11.0549 | 3 K.LAFDDAI Splice@chr  | 4.29E-11 | 6.40E-04 |
| 31Mar2011 | 871   | 420.68  | -22.1784 | 2 R.MMTGTG chrX@9534    | 2.19E-12 | 2.60E-04 |
| 31Mar2011 | 8661  | 833.93  | -9.2006  | 2 _IIEPYVAV Splice@chr  | 2.27E-11 | 6.40E-04 |
| 31Mar2011 | 9284  | 622.33  | 9.587405 | 2 R.AK+14.01 chr2@4270  | 7.48E-10 | 0.009468 |
| 31Mar2011 | 4601  | 461.59  | -10.1596 | 3 K.FLISK+14 Splice@chr | 4.10E-10 | 0.004141 |
| 31Mar2011 | 8836  | 858.48  | 6.006088 | 3 _LETGIKPI Splice@chr  | 9.68E-14 | 0        |
| 31Mar2011 | 12809 | 1147.24 | 4.705638 | 3 R.FQSAAIG Splice@chr  | 5.57E-17 | 0        |
| 31Mar2011 | 13146 | 1018.55 | -8.33756 | 2 K.LFPWRCI Splice@chr  | 5.14E-10 | 0.005588 |
| 31Mar2011 | 507   | 527.27  | -26.7558 | 2 K.VFPFAW chr5@1762    | 2.13E-10 | 0.00176  |
| 31Mar2011 | 9791  | 785.42  | 22.95449 | 1 _MPAWAF chr2@1115     | 3.25E-11 | 6.40E-04 |

|           |       |         |          |                         |          |          |
|-----------|-------|---------|----------|-------------------------|----------|----------|
| 31Mar2011 | 12059 | 634.84  | 6.410455 | 2 R.VDIGDILF Splice@chr | 1.65E-11 | 4.56E-04 |
| 31Mar2011 | 7674  | 554.26  | 6.682444 | 2 R.M+15.99 Splice@chr  | 1.54E-10 | 0.0012   |
| 31Mar2011 | 5344  | 456.75  | -25.512  | 2 K.ITLESPR chr5@5111   | 4.19E-10 | 0.004141 |
| 31Mar2011 | 6062  | 830.39  | -18.1496 | 2 R.FEVFEIEC chr4@7295  | 7.11E-10 | 0.00895  |
| 31Mar2011 | 3738  | 434.24  | 13.9946  | 3 _RSNDQTI chr5@6378    | 5.80E-11 | 8.12E-04 |
| 31Mar2011 | 12248 | 491.64  | 23.22207 | 3 R.LLLDKPLF Splice@chr | 1.50E-10 | 0.0012   |
| 31Mar2011 | 12798 | 1147.25 | 13.44098 | 3 R.FQSAAIG Splice@chr  | 9.76E-15 | 0        |
| 31Mar2011 | 8038  | 671.37  | -24.0361 | 2 T.FNIVHTQ Splice@chr  | 1.28E-10 | 0.0012   |
| 31Mar2011 | 8948  | 664.7   | 1.197202 | 3 _PTLNK+1 chr1@6526    | 7.23E-11 | 8.12E-04 |
| 31Mar2011 | 10912 | 785.42  | 22.95449 | 1 _MPAWAF chr2@1115     | 2.73E-11 | 3.53E-04 |
| 31Mar2011 | 9869  | 858.48  | 6.006088 | 3 _LETGIKPI Splice@chr  | 2.08E-14 | 0        |
| 31Mar2011 | 14445 | 805.17  | 21.58217 | 4 R.HDTPLYC chr1@7966   | 6.28E-10 | 0.007947 |
| 31Mar2011 | 3373  | 620.85  | 23.40758 | 2 C.QLTALGA chr4@7065   | 6.67E-10 | 0.008516 |
| 31Mar2011 | 14664 | 809.01  | -7.47824 | 2 R.FTTELLLL chr3@8986  | 1.67E-11 | 3.53E-04 |
| 31Mar2011 | 12315 | 868.47  | -17.3524 | 2 L.FLWSK+1 chr2@1462   | 1.15E-10 | 0.001468 |
| 31Mar2011 | 6596  | 512.27  | 9.502328 | 2 R.ICTTATID chr5@1130  | 4.17E-11 | 5.25E-04 |
| 31Mar2011 | 10189 | 753.96  | 0.162122 | 2 K.K+14.016 chr2@1375  | 4.86E-11 | 6.87E-04 |
| 31Mar2011 | 9551  | 1134.05 | -14.1995 | 2 _IPSAVGYI Splice@chr  | 1.30E-16 | 0        |
| 31Mar2011 | 3277  | 620.85  | 23.40758 | 2 C.QLTALGA chr4@7065   | 9.95E-11 | 0.001337 |
| 31Mar2011 | 13406 | 634.84  | 6.410455 | 2 R.VDIGDILF Splice@chr | 7.71E-13 | 0        |
| 31Mar2011 | 13707 | 491.64  | 23.22207 | 3 R.LLLDKPLF Splice@chr | 3.32E-11 | 3.53E-04 |
| 31Mar2011 | 3814  | 583.79  | -23.2497 | 2 R.YLAAAAC chr5@9265   | 4.15E-10 | 0.004449 |
| 31Mar2011 | 9728  | 738.39  | -9.84986 | 1 K.MAVYVR Splice@chr   | 7.16E-10 | 0.009684 |
| 31Mar2011 | 9679  | 833.93  | -9.2006  | 2 _IIEPYVAV Splice@chr  | 8.49E-11 | 0.001013 |
| 31Mar2011 | 5912  | 596.32  | 13.94377 | 2 K.M+15.99 chr2@1468   | 4.54E-10 | 0.004882 |
| 31Mar2011 | 12441 | 953.26  | 20.59712 | 4 _SDNDLFE Splice@chr   | 1.99E-10 | 0.002231 |
| 31Mar2011 | 10755 | 1056.56 | 28.0642  | 3 I.SRVEDDSI Splice@chr | 7.37E-16 | 0        |
| 31Mar2011 | 687   | 703.4   | 1.477236 | 1 K.SVLAG EK Splice@chr | 7.00E-10 | 0.009095 |
| 31Mar2011 | 11888 | 742.88  | -6.21424 | 2 K.M+15.99 chr4@1648   | 9.02E-11 | 0.001175 |
| 31Mar2011 | 12455 | 1077.19 | -24.4125 | 3 R.LRHRK+1 Splice@chr  | 3.18E-10 | 0.003268 |
| 31Mar2011 | 2120  | 488.28  | 18.24649 | 2 K.INAEFVG chr4@4515   | 1.34E-10 | 0.001468 |
| 31Mar2011 | 8213  | 671.37  | -24.0361 | 2 T.FNIVHTQ Splice@chr  | 3.61E-10 | 0.003711 |
| 31Mar2011 | 1583  | 510.3   | 12.8833  | 2 R.RHVAVVF chr1@1475   | 6.54E-12 | 0        |
| 31Mar2011 | 3526  | 571.36  | 10.76628 | 2 R.KRKQGAI chr1@1385   | 2.62E-10 | 0.002681 |
| 31Mar2011 | 12779 | 864.95  | 22.09183 | 2 R.KSSTLMR chr4@1655   | 6.43E-12 | 0        |
| 31Mar2011 | 1554  | 626.84  | -1.17032 | 2 R.GCKKPAI chr5@1125   | 5.90E-10 | 0.007076 |
| 31Mar2011 | 8316  | 606.86  | 28.10799 | 2 R.VLPTV FY, chr5@1167 | 3.73E-10 | 0.004011 |
| 31Mar2011 | 9629  | 833.93  | -9.2006  | 2 _IIEPYVAV Splice@chr  | 1.98E-10 | 0.002231 |
| 31Mar2011 | 14223 | 968.17  | -29.3651 | 3 R.FFYNIFAL chrX@4722  | 1.83E-10 | 0.002098 |
| 31Mar2011 | 14670 | 809.52  | 2.833995 | 2 R.FTTELLLL chr3@8986  | 1.18E-11 | 3.53E-04 |
| 31Mar2011 | 11037 | 997     | -14.315  | 2 K.SHCRSRF chr5@4504   | 5.31E-10 | 0.005752 |
| 31Mar2011 | 1246  | 562.31  | -13.4391 | 2 R.FYLLYLYK Splice@chr | 4.82E-11 | 6.87E-04 |
| 31Mar2011 | 3486  | 571.36  | 10.76628 | 2 R.KRKQGAI chr1@1385   | 3.52E-10 | 0.003711 |
| 31Mar2011 | 7593  | 1011.56 | -2.6575  | 1 K.NFLLSVYI chr5@9375  | 4.45E-10 | 0.004882 |
| 31Mar2011 | 8807  | 616.97  | -16.4893 | 3 R.MSQEVA Splice@chr   | 7.88E-12 | 1.95E-04 |
| 31Mar2011 | 10207 | 516.31  | -23.9254 | 3 _NIIFVIFHI chr3@1246  | 1.86E-10 | 0.002098 |
| 31Mar2011 | 3958  | 693.87  | -6.6949  | 2 V.ICVAVGD chr5@1063   | 2.97E-11 | 3.53E-04 |

|           |       |         |          |                         |          |          |
|-----------|-------|---------|----------|-------------------------|----------|----------|
| 31Mar2011 | 6564  | 1017.59 | -22.5744 | 1 R.SSVIMLIV chr2@5767  | 5.54E-10 | 0.0065   |
| 31Mar2011 | 10653 | 1141.62 | 4.816002 | 1 _YLFDTITLE chr2@1007  | 1.04E-10 | 0.001468 |
| 31Mar2011 | 10356 | 622.33  | 9.587405 | 2 R.AK+14.01 chr2@4270  | 5.88E-10 | 0.007076 |
| 31Mar2011 | 6839  | 572.97  | 19.25659 | 3 K.IVLFQLFN chr3@1294  | 2.50E-10 | 0.002526 |
| 31Mar2011 | 8571  | 1106.51 | -25.9146 | 1 R.M+15.99 chr5@9235   | 2.03E-10 | 0.002231 |
| 31Mar2011 | 8573  | 554.26  | 6.682444 | 2 R.M+15.99 Splice@chr  | 2.66E-10 | 0.002836 |
| 31Mar2011 | 8684  | 660.7   | 6.141439 | 3 R.KIANKW/ chr3@2521   | 4.96E-11 | 6.87E-04 |
| 31Mar2011 | 9523  | 829.41  | 4.789104 | 2 R.MVDQIKI chr5@1875   | 6.56E-10 | 0.00839  |
| 31Mar2011 | 9911  | 858.48  | 6.006088 | 3 _LETGIKPI Splice@chr  | 4.45E-14 | 0        |
| 31Mar2011 | 1621  | 510.3   | 12.8833  | 2 R.RHVAYVF chr1@1479   | 6.40E-11 | 6.87E-04 |
| 31Mar2011 | 10235 | 753.96  | 0.162122 | 2 K.K+14.016 chr2@1375  | 2.20E-11 | 3.53E-04 |
| 31Mar2011 | 6847  | 831.4   | -15.4799 | 2 K.KFTFEIEE chrX@1364  | 1.10E-11 | 3.53E-04 |
| 31Mar2011 | 1275  | 562.31  | -13.4391 | 2 R.FYLLYLYK Splice@chr | 5.09E-11 | 6.87E-04 |
| 31Mar2011 | 5179  | 522.31  | -23.2988 | 2 C.PTLLPPLF chr2@1388  | 1.12E-10 | 0.001468 |
| 31Mar2011 | 6676  | 831.39  | -27.5413 | 2 K.KFTFEIEE chrX@1364  | 4.81E-10 | 0.005023 |
| 31Mar2011 | 7313  | 604.33  | 18.58137 | 2 _KDK+14.0 chrX@1077   | 2.22E-11 | 0        |
| 31Mar2011 | 4402  | 677.95  | 22.60469 | 2 R.QLKVIGR chrX@3498   | 1.73E-10 | 0.003815 |
| 31Mar2011 | 13204 | 1116.22 | 16.71106 | 3 K.QAFDDAI Splice@chr  | 2.85E-10 | 0.00608  |
| 31Mar2011 | 9933  | 759.4   | -15.0495 | 2 K.FIDANLQ chr4@8206   | 2.44E-10 | 0.005251 |
| 31Mar2011 | 6167  | 831.39  | -27.5413 | 2 K.KFTFEIEE chrX@1364  | 3.10E-10 | 0.00608  |
| 31Mar2011 | 8454  | 578.83  | 0.845038 | 2 R.LSLPQGC Splice@chr  | 3.47E-11 | 0.001239 |
| 31Mar2011 | 9278  | 858.48  | 6.006088 | 3 _LETGIKPI Splice@chr  | 4.13E-13 | 0        |
| 31Mar2011 | 9561  | 753.96  | 0.162122 | 2 K.K+14.016 chr2@1375  | 4.79E-11 | 0.001239 |
| 31Mar2011 | 3602  | 693.87  | -6.6949  | 2 V.ICVAVGD chr5@1063   | 1.40E-10 | 0.003293 |
| 31Mar2011 | 13592 | 1018.55 | -8.33756 | 2 K.LFPWRCI Splice@chr  | 2.27E-10 | 0.004523 |
| 31Mar2011 | 1394  | 506.27  | 9.784813 | 2 K.KDYSGGT chrX@1465   | 8.97E-11 | 0.002599 |
| 31Mar2011 | 13172 | 968.17  | -29.3651 | 3 R.FFYNIFAL chrX@4722  | 4.33E-10 | 0.008494 |
| 31Mar2011 | 12744 | 491.64  | 23.22207 | 3 R.LLLDKPLF Splice@chr | 1.32E-10 | 0.003293 |
| 31Mar2011 | 6107  | 1051.15 | 14.87916 | 3 E.GGDWSH Splice@chr   | 1.59E-13 | 0        |
| 31Mar2011 | 13799 | 1105.21 | -11.0549 | 3 K.LAFDDAI Splice@chr  | 8.15E-11 | 0.002599 |
| 31Mar2011 | 11704 | 890.45  | 26.12723 | 2 K.GWSVPLI Splice@chr  | 4.26E-10 | 0.008494 |
| 31Mar2011 | 13076 | 962.8   | 19.96909 | 3 _GCSIVPIS Splice@chr  | 1.68E-10 | 0.003815 |
| 31Mar2011 | 6198  | 572.63  | 9.609873 | 3 K.IVLFQLFN chr3@1294  | 3.64E-10 | 0.007313 |
| 31Mar2011 | 5461  | 437.46  | 16.92139 | 4 R.RGDVPEI chr3@1335   | 2.76E-11 | 8.62E-04 |
| 31Mar2011 | 2988  | 560.97  | -7.77518 | 3 K.K+14.016 chrX@1071  | 9.70E-11 | 0.002764 |
| 31Mar2011 | 7799  | 671.37  | -24.0361 | 2 T.FNIVHTQ Splice@chr  | 4.92E-10 | 0.009693 |
| 31Mar2011 | 3582  | 730.33  | -26.2772 | 2 C.RFFSNNP chr5@1970   | 2.05E-10 | 0.003986 |
| 31Mar2011 | 11960 | 864.95  | 22.09183 | 2 R.KSSTLMR chr4@1655   | 5.12E-11 | 0.001239 |
| 31Mar2011 | 6326  | 831.39  | -27.5413 | 2 K.KFTFEIEE chrX@1364  | 5.94E-12 | 0        |
| 31Mar2011 | 1130  | 562.31  | -13.4391 | 2 R.FYLLYLYK Splice@chr | 4.88E-11 | 0.001239 |
| 31Mar2011 | 13486 | 916.98  | -20.1114 | 4 R.YEKVIIFN chr5@1391  | 2.52E-10 | 0.005589 |
| 31Mar2011 | 9031  | 1133.55 | -12.7184 | 2 _IPSAVGY( Splice@chr  | 5.03E-19 | 0        |
| 31Mar2011 | 5191  | 1116.65 | 11.05125 | 1 K.INLKVNSI chr2@7016  | 3.85E-10 | 0.007818 |
| 31Mar2011 | 3291  | 423.26  | 23.30279 | 2 K.LGAETVV chr2@6180   | 2.29E-10 | 0.004523 |
| 31Mar2011 | 9697  | 833.42  | -19.2103 | 2 _IIEPYVAV Splice@chr  | 1.79E-10 | 0.003815 |
| 31Mar2011 | 10613 | 473.57  | -23.6784 | 3 R.TSFHSSL5 chr5@5498  | 6.83E-11 | 0.001832 |
| 31Mar2011 | 3029  | 620.85  | 23.40758 | 2 C.QLTALGA chr4@7065   | 2.14E-10 | 0.004347 |

|           |       |         |          |                         |          |          |
|-----------|-------|---------|----------|-------------------------|----------|----------|
| 31Mar2011 | 3019  | 519.6   | -26.5197 | 3 K.IGSM+15 chr5@1654   | 1.44E-11 | 0        |
| 31Mar2011 | 8867  | 512     | 16.32434 | 3 K.K+14.016 chrX@1261  | 4.03E-10 | 0.007985 |
| 31Mar2011 | 13170 | 970.45  | -29.5364 | 3 _VACNKM Splice@chr    | 3.01E-10 | 0.00608  |
| 31Mar2011 | 12521 | 634.84  | 6.410455 | 2 R.VDIGDILF Splice@chr | 2.49E-12 | 0        |
| 31Mar2011 | 6010  | 1017.59 | -22.5744 | 1 R.SSVIMLIV chr2@5767  | 3.76E-11 | 0.001239 |
| 31Mar2011 | 11512 | 868.47  | -17.3524 | 2 L.FLWSK+1 chr2@1462   | 2.22E-10 | 0.004523 |
| 31Mar2011 | 2032  | 493.61  | 28.00299 | 3 _FQRHNLN chrX@1408    | 2.76E-10 | 0.00608  |
| 31Mar2011 | 13715 | 809.02  | 4.909957 | 2 R.FTTELLLL chr3@8986  | 4.78E-10 | 0.008985 |
| 31Mar2011 | 8002  | 554.26  | 6.682444 | 2 R.M+15.99 Splice@chr  | 9.45E-11 | 0.002764 |
| 31Mar2011 | 10860 | 753.96  | 0.162122 | 2 K.K+14.016 chr2@1375  | 6.16E-11 | 7.89E-04 |
| 31Mar2011 | 11654 | 785.42  | 22.95449 | 1 _MPAWAF chr2@1115     | 2.85E-11 | 3.26E-04 |
| 31Mar2011 | 15437 | 1064.23 | -7.63665 | 3 R.QWQQDI chr1@2059    | 5.42E-10 | 0.009827 |
| 31Mar2011 | 2398  | 488.28  | 18.24649 | 2 K.INAEFVG chr4@4519   | 3.04E-10 | 0.005172 |
| 31Mar2011 | 9267  | 660.7   | 6.141439 | 3 R.KIANKW/ chr3@2521   | 4.78E-10 | 0.008641 |
| 31Mar2011 | 3641  | 519.6   | -26.5197 | 3 K.IGSM+15 chr5@1654   | 8.50E-11 | 0.001393 |
| 31Mar2011 | 3634  | 560.97  | -7.77518 | 3 K.K+14.016 chrX@1071  | 1.89E-10 | 0.002808 |
| 31Mar2011 | 11302 | 965.52  | 17.33925 | 4 R.KTSSCQK chr5@2085   | 3.20E-10 | 0.006003 |
| 31Mar2011 | 1503  | 562.31  | -13.4391 | 2 R.FYLLYLYK Splice@chr | 4.85E-11 | 4.79E-04 |
| 31Mar2011 | 3635  | 620.85  | 23.40758 | 2 C.QLTALGA chr4@7065   | 5.00E-10 | 0.009019 |
| 31Mar2011 | 2337  | 493.61  | 28.00299 | 3 _FQRHNLN chrX@1408    | 2.10E-10 | 0.003518 |
| 31Mar2011 | 8656  | 671.37  | -24.0361 | 2 T.FNIVHTQ Splice@chr  | 2.96E-10 | 0.005172 |
| 31Mar2011 | 9418  | 616.97  | -16.4893 | 3 R.MSQEVA Splice@chr   | 6.35E-12 | 0        |
| 31Mar2011 | 4593  | 434.24  | 13.9946  | 3 _RSNDQTI chr5@6378    | 3.22E-10 | 0.006003 |
| 31Mar2011 | 7241  | 831.39  | -27.5413 | 2 K.KFTFEIEE chrX@1364  | 5.36E-10 | 0.009563 |
| 31Mar2011 | 14361 | 634.84  | 6.410455 | 2 R.VDIGDILF Splice@chr | 2.38E-13 | 0        |
| 31Mar2011 | 9164  | 554.26  | 6.682444 | 2 R.M+15.99 Splice@chr  | 1.31E-10 | 0.002106 |
| 31Mar2011 | 15735 | 916.98  | -20.1114 | 4 R.YEKVIIFN chr5@1391  | 4.62E-10 | 0.008383 |
| 31Mar2011 | 11730 | 996.49  | -22.685  | 2 K.SHCRSRF chr5@4504   | 8.91E-11 | 0.001536 |
| 31Mar2011 | 10475 | 858.48  | 6.006088 | 3 _LETGIKPI Splice@chr  | 3.63E-13 | 0        |
| 31Mar2011 | 1465  | 562.31  | -13.4391 | 2 R.FYLLYLYK Splice@chr | 4.94E-11 | 4.79E-04 |
| 31Mar2011 | 11266 | 759.4   | -15.0495 | 2 K.FIDANLQ chr4@8206   | 1.68E-10 | 0.002378 |
| 31Mar2011 | 15303 | 970.45  | -29.5364 | 3 _VACNKM Splice@chr    | 4.00E-10 | 0.007042 |
| 31Mar2011 | 3683  | 620.85  | 23.40758 | 2 C.QLTALGA chr4@7065   | 4.97E-10 | 0.009019 |
| 31Mar2011 | 15313 | 968.17  | -29.3651 | 3 R.FFYNIFAL chrX@4722  | 4.50E-10 | 0.00798  |
| 31Mar2011 | 11609 | 785.42  | 22.95449 | 1 _MPAWAF chr2@1115     | 2.85E-11 | 3.26E-04 |
| 31Mar2011 | 10235 | 606.66  | -18.8783 | 3 I.NRFNISLK chrX@1250  | 1.27E-10 | 0.002106 |
| 31Mar2011 | 13847 | 1007.86 | 15.19559 | 3 R.CWNRRA Splice@chr   | 8.38E-12 | 0        |
| 31Mar2011 | 5978  | 639.65  | -12.525  | 3 R.NLM+15. chr1@5405   | 1.89E-10 | 0.002808 |
| 31Mar2011 | 9554  | 1128.04 | -2.03078 | 2 _IPSAVGY( Splice@chr  | 1.00E-12 | 0        |
| 31Mar2011 | 5610  | 522.31  | -23.2988 | 2 C.PTLLPPLF chr2@1388  | 1.70E-10 | 0.002378 |
| 31Mar2011 | 15407 | 1147.25 | 13.44098 | 3 R.FQSAAG Splice@chr   | 7.60E-16 | 0        |
| 31Mar2011 | 11769 | 996.99  | -24.37   | 2 K.SHCRSRF chr5@4504   | 3.83E-10 | 0.006924 |
| 31Mar2011 | 13271 | 804.1   | 9.150142 | 3 R.QLTTLEI Splice@chr  | 3.60E-18 | 0        |
| 31Mar2011 | 10810 | 753.96  | 0.162122 | 2 K.K+14.016 chr2@1375  | 5.24E-11 | 6.36E-04 |
| 31Mar2011 | 14744 | 968.13  | 18.26018 | 3 _GCSIVPIS Splice@chr  | 2.88E-10 | 0.005043 |
| 31Mar2011 | 10309 | 833.93  | -9.2006  | 2 _IIEPYVAV Splice@chr  | 3.86E-10 | 0.006924 |
| 31Mar2011 | 10176 | 1134.05 | -14.1995 | 2 _IPSAVGY( Splice@chr  | 6.11E-16 | 0        |

|           |       |         |          |                         |          |          |
|-----------|-------|---------|----------|-------------------------|----------|----------|
| 31Mar2011 | 13155 | 868.47  | -17.3524 | 2 L.FLWSK+1 chr2@1462   | 1.25E-10 | 0.002106 |
| 31Mar2011 | 13153 | 750.38  | -16.0136 | 2 V.SWQILFN Splice@chr  | 4.97E-10 | 0.009019 |
| 31Mar2011 | 9610  | 1128.04 | -2.03078 | 2 _IPSAVGY Splice@chr   | 1.41E-11 | 1.67E-04 |
| 31Mar2011 | 15395 | 1147.25 | 13.44098 | 3 R.FQSAAIG Splice@chr  | 1.38E-16 | 0        |
| 31Mar2011 | 8492  | 705.83  | -3.72364 | 2 M.PSMEEV chr5@4890    | 1.89E-14 | 0        |
| 31Mar2011 | 10255 | 833.93  | -9.2006  | 2 _IIEPYVAV Splice@chr  | 4.78E-10 | 0.008641 |
| 31Mar2011 | 14389 | 634.84  | 6.410455 | 2 R.VDIGDILF Splice@chr | 7.17E-13 | 0        |
| 31Mar2011 | 11572 | 1144.59 | 27.90078 | 2 _YYHFTLDI chr5@8295   | 5.21E-10 | 0.009431 |
| 31Mar2011 | 12282 | 835.45  | -7.2977  | 4 R.K+14.016 chrX@9996  | 6.68E-11 | 9.39E-04 |
| 31Mar2011 | 10054 | 692.35  | -25.4254 | 2 K.KDKNAAF chr3@8925   | 4.24E-10 | 0.00759  |
| 31Mar2011 | 6024  | 509.77  | 14.99622 | 2 K.TDGNNEI chr1@1751   | 3.95E-10 | 0.007042 |
| 31Mar2011 | 10425 | 858.47  | -5.67211 | 3 _LETGIKPI Splice@chr  | 1.74E-11 | 1.67E-04 |
| 31Mar2011 | 7337  | 831.39  | -27.5413 | 2 K.KFTFEIEE chrX@1364  | 7.50E-12 | 0        |
| 31Mar2011 | 13572 | 672.59  | -4.41756 | 5 R.KVSNVQ\ chr5@8812   | 9.77E-11 | 0.001674 |
| 31Mar2011 | 8668  | 730.38  | -23.8587 | 3 K.DNVVNTI chr3@7825   | 4.65E-10 | 0.008383 |
| 31Mar2011 | 12873 | 1143.87 | 4.220916 | 3 K.NMITGTS Splice@chr  | 2.42E-10 | 0.004079 |
| 31Mar2011 | 13610 | 672.59  | -4.41756 | 5 R.KVSNVQ\ chr5@8812   | 6.23E-11 | 7.89E-04 |
| 31Mar2011 | 15609 | 828.38  | -20.1128 | 2 K.PNLK+14 chr2@3862   | 3.42E-10 | 0.006551 |
| 31Mar2011 | 14663 | 491.64  | 23.22207 | 3 R.LLLDKPLF Splice@chr | 5.90E-11 | 7.89E-04 |
| 31Mar2011 | 16051 | 1105.21 | -11.0549 | 3 K.LAFDDAI Splice@chr  | 1.73E-11 | 1.67E-04 |
| 31Mar2011 | 13677 | 864.95  | 22.09183 | 2 R.KSSTLMR chr4@1655   | 2.22E-10 | 0.003664 |
| 31Mar2011 | 1419  | 562.31  | -13.4391 | 2 R.FYLLYLYK Splice@chr | 5.42E-11 | 0.001357 |
| 31Mar2011 | 14264 | 968.13  | 14.47345 | 3 _CSIRPISG Splice@chr  | 4.08E-10 | 0.007187 |
| 31Mar2011 | 10705 | 833.42  | -19.2103 | 2 _IIEPYVAV Splice@chr  | 1.73E-10 | 0.003379 |
| 31Mar2011 | 11362 | 996.49  | -22.685  | 2 K.SHCRSRF chr5@4504   | 7.34E-11 | 0.001357 |
| 31Mar2011 | 6984  | 1051.14 | 5.269702 | 3 E.GGDWSH Splice@chr   | 1.67E-12 | 0        |
| 31Mar2011 | 5955  | 604.3   | -19.811  | 4 K.HPLSDSN Splice@chr  | 4.99E-10 | 0.008606 |
| 31Mar2011 | 7035  | 1051.15 | 14.87916 | 3 E.GGDWSH Splice@chr   | 9.40E-14 | 0        |
| 31Mar2011 | 9171  | 616.97  | -16.4893 | 3 R.MSQEVA Splice@chr   | 1.16E-10 | 0.002141 |
| 31Mar2011 | 14889 | 968.51  | -23.6218 | 3 R.FFYNIFAL chrX@4722  | 1.93E-10 | 0.003667 |
| 31Mar2011 | 10951 | 759.4   | -15.0495 | 2 K.FIDANLQ chr4@8206   | 3.58E-10 | 0.006152 |
| 31Mar2011 | 14872 | 968.17  | -29.3651 | 3 R.FFYNIFAL chrX@4722  | 6.41E-11 | 0.001357 |
| 31Mar2011 | 11623 | 473.57  | -23.6784 | 3 R.TSFHSSL\ chr5@5498  | 3.28E-10 | 0.005267 |
| 31Mar2011 | 11291 | 785.42  | 22.95449 | 1 _MPAWAF chr2@1115     | 1.74E-11 | 7.41E-04 |
| 31Mar2011 | 7045  | 440.24  | 24.04044 | 2 R.YNRAPM chr5@4305    | 2.76E-10 | 0.004543 |
| 31Mar2011 | 12695 | 868.47  | -17.3524 | 2 L.FLWSK+1 chr2@1462   | 7.61E-11 | 0.001357 |
| 31Mar2011 | 3845  | 546.78  | -19.0827 | 2 K.ETETGITC chr4@1221  | 1.79E-10 | 0.003379 |
| 31Mar2011 | 10254 | 762.42  | 3.25006  | 2 _MK+14.0 chr4@7749    | 5.55E-10 | 0.009462 |
| 31Mar2011 | 13251 | 864.95  | 22.09183 | 2 R.KSSTLMR chr4@1655   | 3.30E-11 | 8.95E-04 |
| 31Mar2011 | 11665 | 473.57  | -23.6784 | 3 R.TSFHSSL\ chr5@5498  | 4.25E-10 | 0.007476 |
| 31Mar2011 | 8474  | 671.37  | -24.0361 | 2 T.FNIVHTQ Splice@chr  | 3.21E-10 | 0.005115 |
| 31Mar2011 | 9899  | 501.3   | -0.81333 | 3 K.FLVK+14. chrX@8948  | 3.54E-10 | 0.006152 |
| 31Mar2011 | 11331 | 785.42  | 22.95449 | 1 _MPAWAF chr2@1115     | 3.38E-11 | 8.95E-04 |
| 31Mar2011 | 13172 | 672.58  | -19.3267 | 5 R.KVSNVQ\ chr5@8812   | 1.27E-10 | 0.0023   |
| 31Mar2011 | 10081 | 833.93  | -9.2006  | 2 _IIEPYVAV Splice@chr  | 2.01E-10 | 0.003667 |
| 31Mar2011 | 1293  | 593.03  | 16.63311 | 3 R.SKWSKSS chrX@8722   | 1.99E-10 | 0.003667 |
| 31Mar2011 | 8609  | 751.88  | -20.0772 | 2 K.ILNSCELP chr1@3164  | 3.89E-11 | 0.001054 |

|           |       |         |          |                          |          |          |
|-----------|-------|---------|----------|--------------------------|----------|----------|
| 31Mar2011 | 13987 | 980.12  | -17.106  | 3 K.AVPFVPI\$ Splice@chr | 7.95E-11 | 0.001357 |
| 31Mar2011 | 13470 | 1007.86 | 15.19559 | 3 R.CWNRRA Splice@chr    | 5.20E-11 | 0.00122  |
| 31Mar2011 | 14964 | 1147.24 | 4.705638 | 3 R.FQSAAIG Splice@chr   | 1.34E-15 | 0        |
| 31Mar2011 | 8988  | 554.26  | 6.682444 | 2 R.M+15.99 Splice@chr   | 1.89E-10 | 0.003526 |
| 31Mar2011 | 6061  | 431.74  | 5.455516 | 2 _PIQDVYK Splice@chr    | 2.95E-10 | 0.004826 |
| 31Mar2011 | 8784  | 1111.1  | -11.1063 | 2 R.LLM+15.5 chr4@3284   | 8.09E-11 | 0.001357 |
| 31Mar2011 | 10264 | 858.48  | 6.006088 | 3 _LETGIKPI Splice@chr   | 8.64E-14 | 0        |
| 31Mar2011 | 10591 | 753.96  | 0.162122 | 2 K.K+14.016 chr2@1375   | 1.77E-11 | 7.41E-04 |
| 31Mar2011 | 3500  | 560.97  | -7.77518 | 3 K.K+14.016 chrX@1071   | 4.51E-11 | 0.001054 |
| 31Mar2011 | 14987 | 1147.25 | 13.44098 | 3 R.FQSAAIG Splice@chr   | 1.40E-14 | 0        |
| 31Mar2011 | 3545  | 620.85  | 23.40758 | 2 C.QLTALGA chr4@7065    | 1.11E-10 | 0.002141 |
| 31Mar2011 | 615   | 549.29  | -19.7752 | 2 K.FRVQYQC Splice@chr   | 5.35E-10 | 0.009329 |
| 31Mar2011 | 13920 | 634.84  | 6.410455 | 2 R.VDIGDILF Splice@chr  | 3.18E-12 | 2.07E-04 |
| 31Mar2011 | 7227  | 831.39  | -27.5413 | 2 K.KFTFEIEE chrX@1364   | 2.42E-11 | 8.95E-04 |
| 31Mar2011 | 1465  | 562.31  | -13.4391 | 2 R.FYLLYLYK Splice@chr  | 9.16E-11 | 0.001681 |
| 31Mar2011 | 11611 | 468.91  | -17.4792 | 3 K.TSRNAFK chr1@3696    | 4.55E-11 | 0.001054 |
| 31Mar2011 | 9972  | 1133.55 | -12.7184 | 2 _IPSAVGYC Splice@chr   | 8.03E-18 | 0        |
| 31Mar2011 | 10755 | 833.42  | -19.2103 | 2 _IIEPYVAV Splice@chr   | 1.39E-10 | 0.002607 |
| 31Mar2011 | 2337  | 488.28  | 18.24649 | 2 K.INAEFVG chr4@4515    | 5.10E-10 | 0.008606 |
| 31Mar2011 | 14235 | 491.64  | 23.22207 | 3 R.LLLDKPLF Splice@chr  | 1.28E-11 | 5.66E-04 |
| 31Mar2011 | 14188 | 491.64  | 23.22207 | 3 R.LLLDKPLF Splice@chr  | 4.88E-11 | 0.00122  |
| 31Mar2011 | 10218 | 858.47  | -5.67211 | 3 _LETGIKPI Splice@chr   | 6.94E-13 | 0        |
| 31Mar2011 | 10036 | 833.93  | -9.2006  | 2 _IIEPYVAV Splice@chr   | 4.92E-10 | 0.008606 |
| 31Mar2011 | 10541 | 753.95  | -13.1319 | 2 K.K+14.016 chr2@1375   | 2.62E-11 | 8.95E-04 |
| 31Mar2011 | 1400  | 464.24  | -7.11495 | 2 K.ETSFSTKk chr4@8236   | 3.31E-10 | 0.005419 |
| 31Mar2011 | 13446 | 582.65  | 15.01592 | 3 R.SIFVDLEP Splice@chr  | 2.28E-11 | 8.95E-04 |
| 31Mar2011 | 7724  | 516.78  | 20.90941 | 2 L.EQGTAAl Splice@chr   | 2.72E-10 | 0.004543 |
| 31Mar2011 | 10999 | 759.4   | -15.0495 | 2 K.FIDANLQ chr4@8206    | 2.42E-10 | 0.00409  |
| 31Mar2011 | 12240 | 926.96  | -2.20822 | 2 L.QTK+14.C Splice@chr  | 5.81E-13 | 0        |
| 31Mar2011 | 7857  | 785.42  | 22.95449 | 1 _MPAWAF chr2@1115      | 2.70E-11 | 5.76E-04 |
| 31Mar2011 | 10598 | 1105.21 | -11.0549 | 3 K.LAFDDAl Splice@chr   | 7.00E-12 | 0        |
| 31Mar2011 | 5538  | 523.62  | 6.773786 | 3 I.VFQNFVP chr2@1515    | 7.00E-11 | 0.001929 |
| 31Mar2011 | 5713  | 671.37  | -24.0361 | 2 T.FNIVHTQ Splice@chr   | 1.44E-10 | 0.003476 |
| 31Mar2011 | 2269  | 430.98  | 28.39109 | 4 K.YVITNGIM chr4@8395   | 2.22E-11 | 5.76E-04 |
| 31Mar2011 | 7425  | 833.42  | -19.2103 | 2 _IIEPYVAV Splice@chr   | 1.00E-10 | 0.002451 |
| 31Mar2011 | 9684  | 634.84  | 6.410455 | 2 R.VDIGDILF Splice@chr  | 2.50E-12 | 0        |
| 31Mar2011 | 3166  | 1025.61 | -11.6755 | 1 K.LGLGSL chr5@4945     | 4.31E-12 | 0        |
| 31Mar2011 | 2986  | 677.95  | 22.60469 | 2 R.QLKVIGR chrX@3498    | 2.85E-10 | 0.007488 |
| 31Mar2011 | 7328  | 753.96  | 0.162122 | 2 K.K+14.016 chr2@1375   | 1.51E-11 | 2.99E-04 |
| 31Mar2011 | 7290  | 753.96  | 0.162122 | 2 K.K+14.016 chr2@1375   | 3.49E-10 | 0.008949 |
| 31Mar2011 | 9838  | 491.64  | 23.22207 | 3 R.LLLDKPLF Splice@chr  | 8.17E-11 | 0.001929 |
| 31Mar2011 | 7887  | 785.42  | 22.95449 | 1 _MPAWAF chr2@1115      | 3.33E-11 | 5.76E-04 |
| 31Mar2011 | 3208  | 677.95  | 22.60469 | 2 R.QLKVIGR chrX@3498    | 5.76E-11 | 0.001678 |
| 31Mar2011 | 5501  | 523.62  | 6.773786 | 3 I.VFQNFVP chr2@1515    | 1.98E-10 | 0.00603  |
| 31Mar2011 | 6869  | 607     | -9.70672 | 3 I.NRFNISK chrX@1250    | 1.23E-10 | 0.002699 |
| 31Mar2011 | 1363  | 917.53  | -12.9857 | 1 K.VISSLDRK chr5@9012   | 3.68E-10 | 0.009193 |
| 31Mar2011 | 10512 | 809.52  | 2.833995 | 2 R.FTTELLLL chr3@8986   | 1.05E-10 | 0.002451 |

|           |       |         |          |                         |          |          |
|-----------|-------|---------|----------|-------------------------|----------|----------|
| 31Mar2011 | 4785  | 673.32  | -23.1345 | 4 _QVREMH Splice@chr    | 2.43E-10 | 0.007254 |
| 31Mar2011 | 10276 | 1147.24 | 4.705638 | 3 R.FQSAAIG Splice@chr  | 1.56E-17 | 0        |
| 31Mar2011 | 7758  | 785.42  | 22.95449 | 1 _MPAWAF chr2@1115     | 4.29E-11 | 8.60E-04 |
| 31Mar2011 | 6850  | 607     | -9.70672 | 3 I.NRFNISK chrX@1250   | 8.45E-11 | 0.001693 |
| 31Mar2011 | 7798  | 785.42  | 22.95449 | 1 _MPAWAF chr2@1115     | 2.24E-10 | 0.003512 |
| 31Mar2011 | 8912  | 953.26  | 20.59712 | 4 _SDNDLFE Splice@chr   | 3.74E-10 | 0.007918 |
| 31Mar2011 | 751   | 464.24  | -7.11495 | 2 K.ETSFSTK chr4@8236   | 3.05E-10 | 0.005851 |
| 31Mar2011 | 7348  | 833.42  | -19.2103 | 2 _IIEPYVAV Splice@chr  | 1.16E-10 | 0.002501 |
| 31Mar2011 | 4905  | 586.34  | 11.36604 | 2 R.LVILFFLF chr2@6458  | 4.31E-10 | 0.008905 |
| 31Mar2011 | 7380  | 622.33  | 9.587405 | 2 R.AK+14.01 chr2@4270  | 2.70E-10 | 0.005328 |
| 31Mar2011 | 5481  | 523.62  | 6.773786 | 3 I.VFQNFVP chr2@1515   | 1.73E-10 | 0.003278 |
| 31Mar2011 | 9155  | 1003.18 | 7.145987 | 3 R.CWNRRA Splice@chr   | 5.40E-13 | 0        |
| 31Mar2011 | 8286  | 610.67  | 21.02419 | 3 _WFMEKT chr5@1462     | 2.53E-10 | 0.004026 |
| 31Mar2011 | 1787  | 741.39  | -17.2291 | 2 K.QKSNWH chr5@1229    | 5.73E-11 | 8.60E-04 |
| 31Mar2011 | 6377  | 701.35  | 13.82807 | 3 K.NNPYMS Splice@chr   | 4.09E-10 | 0.008905 |
| 31Mar2011 | 10409 | 539.68  | 0.075538 | 3 R.FTTELLLL chr3@8986  | 3.51E-10 | 0.007128 |
| 31Mar2011 | 10411 | 809.02  | 4.909957 | 2 R.FTTELLLL chr3@8986  | 1.26E-11 | 3.03E-04 |
| 31Mar2011 | 6261  | 816.88  | -0.03611 | 2 S.NFRSDNL Splice@chr  | 3.78E-10 | 0.008169 |
| 31Mar2011 | 6883  | 833.93  | -9.2006  | 2 _IIEPYVAV Splice@chr  | 3.38E-11 | 8.60E-04 |
| 31Mar2011 | 10403 | 809.01  | -7.47824 | 2 R.FTTELLLL chr3@8986  | 2.28E-10 | 0.003778 |
| 31Mar2011 | 7812  | 778.9   | -26.6764 | 2 R.EWNVVN chr1@1438    | 1.64E-10 | 0.003278 |
| 31Mar2011 | 8452  | 742.88  | -6.21424 | 2 K.M+15.99 chr4@1648   | 2.43E-10 | 0.004026 |
| 31Mar2011 | 9204  | 859.66  | -22.4616 | 4 _ISMTNSN chrX@1761    | 1.95E-10 | 0.003512 |
| 31Mar2011 | 6807  | 607     | -9.70672 | 3 I.NRFNISK chrX@1250   | 1.35E-10 | 0.002756 |
| 31Mar2011 | 5438  | 523.62  | 6.773786 | 3 I.VFQNFVP chr2@1515   | 2.51E-10 | 0.004026 |
| 31Mar2011 | 5552  | 705.83  | -3.72364 | 2 M.PSMEEV chr5@4890    | 7.49E-14 | 0        |
| 31Mar2011 | 9745  | 491.64  | 23.22207 | 3 R.LLLDKPLF Splice@chr | 3.07E-10 | 0.006111 |
| 31Mar2011 | 7257  | 753.96  | 0.162122 | 2 K.K+14.016 chr2@1375  | 1.78E-10 | 0.003278 |
| 31Mar2011 | 9578  | 634.83  | -9.39461 | 2 R.VDIGDILF Splice@chr | 1.00E-12 | 0        |
| 31Mar2011 | 6936  | 648.86  | -13.0566 | 2 R.QM+15.9 chr3@9694   | 4.87E-11 | 8.60E-04 |
| 31Mar2011 | 7621  | 558.3   | -13.2154 | 3 R.KFWNVP chrX@1472    | 2.76E-11 | 1.87E-04 |
| 31Mar2011 | 2731  | 741.39  | -17.2291 | 2 K.QKSNWH chr5@1229    | 3.27E-11 | 3.67E-04 |
| 31Mar2011 | 7809  | 671.37  | -24.0361 | 2 T.FNIVHTQ Splice@chr  | 2.41E-10 | 0.004001 |
| 31Mar2011 | 11153 | 926.96  | -2.20822 | 2 L.QTK+14.C Splice@chr | 3.83E-14 | 0        |
| 31Mar2011 | 11865 | 1003.19 | 17.13413 | 3 R.CWNRRA Splice@chr   | 3.02E-12 | 0        |
| 31Mar2011 | 9321  | 858.48  | 6.006088 | 3 _LETGIKPI Splice@chr  | 9.30E-13 | 0        |
| 31Mar2011 | 9593  | 753.96  | 0.162122 | 2 K.K+14.016 chr2@1375  | 3.26E-11 | 3.67E-04 |
| 31Mar2011 | 10100 | 1005.47 | -16.3827 | 2 K.KVELALV Splice@chr  | 5.67E-22 | 0        |
| 31Mar2011 | 10311 | 785.42  | 22.95449 | 1 _MPAWAF chr2@1115     | 4.69E-11 | 7.26E-04 |
| 31Mar2011 | 8049  | 724.06  | 2.506414 | 3 R.NELEVKF chr1@1385   | 7.14E-11 | 0.001401 |
| 31Mar2011 | 10290 | 854.92  | -17.9855 | 2 _KSFEVAIE Splice@chr  | 2.58E-15 | 0        |
| 31Mar2011 | 9632  | 753.96  | 0.162122 | 2 K.K+14.016 chr2@1375  | 2.27E-10 | 0.004001 |
| 31Mar2011 | 13096 | 1165.58 | -1.37991 | 3 _DNKSWH chrX@1030     | 3.39E-11 | 3.67E-04 |
| 31Mar2011 | 8169  | 833.42  | 6.892432 | 2 _IDM+15.5 chrX@3237   | 1.59E-10 | 0.003053 |
| 31Mar2011 | 10038 | 965.77  | 16.46969 | 4 R.KTSSCQK chr5@2085   | 9.18E-11 | 0.001565 |
| 31Mar2011 | 7329  | 657.04  | -26.9179 | 3 R.GNVRK+1 chrX@7490   | 2.68E-10 | 0.004468 |
| 31Mar2011 | 10058 | 1141.62 | 4.816002 | 1 _YLFDTLE chr2@1007    | 5.85E-10 | 0.009737 |

|           |       |         |          |                         |          |          |
|-----------|-------|---------|----------|-------------------------|----------|----------|
| 31Mar2011 | 6408  | 748.73  | -12.625  | 3 R.LPSKENL\ chr4@563   | 2.69E-10 | 0.004468 |
| 31Mar2011 | 1219  | 562.31  | -13.4391 | 2 R.FYLLYLYK Splice@chr | 4.91E-11 | 8.99E-04 |
| 31Mar2011 | 11300 | 1143.54 | 8.191279 | 3 K.NMITGTS Splice@chr  | 1.39E-10 | 0.002559 |
| 31Mar2011 | 6222  | 1017.59 | -22.5744 | 1 R.SSVIMLIV chr2@576   | 4.02E-10 | 0.007126 |
| 31Mar2011 | 3329  | 566.81  | 0.647242 | 2 I.RIPLDYAE chr5@204   | 6.11E-11 | 0.001247 |
| 31Mar2011 | 4437  | 677.95  | 22.60469 | 2 R.QLKVIGR chrX@349    | 2.14E-11 | 1.87E-04 |
| 31Mar2011 | 3357  | 423.26  | 23.30279 | 2 K.LGAETVV chr2@618    | 4.41E-10 | 0.007751 |
| 31Mar2011 | 7631  | 705.84  | 10.47814 | 2 M.PSMEEV Splice@chr   | 6.37E-11 | 0.001247 |
| 31Mar2011 | 13226 | 1147.25 | 13.44098 | 3 R.FQSAAIG Splice@chr  | 6.61E-16 | 0        |
| 31Mar2011 | 9101  | 607     | -9.70672 | 3 I.NRFNISK chrX@125    | 1.51E-10 | 0.002889 |
| 31Mar2011 | 6243  | 509.8   | -23.773  | 2 R.SSVIMLIV chr2@576   | 3.76E-11 | 3.67E-04 |
| 31Mar2011 | 12291 | 783.45  | -3.51026 | 2 K.MLKK+14 chr5@167    | 4.71E-10 | 0.008207 |
| 31Mar2011 | 1153  | 464.24  | -7.11495 | 2 K.ETSFSTK chr4@823    | 4.57E-10 | 0.008207 |
| 31Mar2011 | 9133  | 855.41  | -22.1447 | 2 _HVQEVAI Splice@chr   | 2.50E-11 | 1.87E-04 |
| 31Mar2011 | 2779  | 741.39  | -17.2291 | 2 K.QKSNWH chr5@122     | 5.70E-11 | 0.001074 |
| 31Mar2011 | 9878  | 514.52  | 26.86268 | 4 K.LSCFKHG chrX@146    | 4.33E-10 | 0.007279 |
| 31Mar2011 | 5437  | 975.55  | -13.0268 | 1 K.LPKLDAYI chr4@114   | 2.44E-10 | 0.004162 |
| 31Mar2011 | 5395  | 437.46  | 16.92139 | 4 R.RGDVPEI chr3@133    | 2.12E-11 | 1.87E-04 |
| 31Mar2011 | 12733 | 491.64  | 23.22207 | 3 R.LLLDKPLF Splice@chr | 1.45E-10 | 0.002889 |
| 31Mar2011 | 2984  | 936.48  | 27.86052 | 1 K.LNGGYEC chr2@119    | 1.27E-10 | 0.002224 |
| 31Mar2011 | 1179  | 562.31  | -13.4391 | 2 R.FYLLYLYK Splice@chr | 4.81E-11 | 7.26E-04 |
| 31Mar2011 | 4109  | 538.29  | -18.2475 | 2 R.PKCLSRV Splice@chr  | 1.24E-10 | 0.002224 |
| 31Mar2011 | 6193  | 509.8   | -23.773  | 2 R.SSVIMLIV chr2@576   | 5.54E-11 | 8.99E-04 |
| 31Mar2011 | 9152  | 833.93  | -9.2006  | 2 _IIEPYVAV Splice@chr  | 4.97E-10 | 0.00851  |
| 31Mar2011 | 12557 | 980.12  | -17.106  | 3 K.AVPFVPI Splice@chr  | 5.87E-10 | 0.00989  |
| 31Mar2011 | 7378  | 657.04  | -26.9179 | 3 R.GNVRK+1 chrX@749    | 1.45E-10 | 0.002889 |
| 31Mar2011 | 8033  | 748.73  | -12.625  | 3 R.LPSKENL\ chr4@563   | 5.41E-10 | 0.009426 |
| 31Mar2011 | 12514 | 634.84  | 6.410455 | 2 R.VDIGDILF Splice@chr | 4.39E-13 | 0        |
| 31Mar2011 | 11682 | 754.1   | 20.46108 | 3 _DLLEALD Splice@chr   | 2.25E-10 | 0.004001 |
| 31Mar2011 | 9604  | 833.42  | -19.2103 | 2 _IIEPYVAV Splice@chr  | 1.01E-10 | 0.002772 |
| 31Mar2011 | 7748  | 748.72  | -26.0118 | 3 R.LPSKENL\ chr4@563   | 2.54E-10 | 0.006645 |
| 31Mar2011 | 12801 | 491.64  | 23.22207 | 3 R.LLLDKPLF Splice@chr | 3.36E-10 | 0.008705 |
| 31Mar2011 | 12787 | 491.64  | 23.22207 | 3 R.LLLDKPLF Splice@chr | 1.14E-10 | 0.002772 |
| 31Mar2011 | 7705  | 748.73  | -12.625  | 3 R.LPSKENL\ chr4@563   | 3.48E-10 | 0.008705 |
| 31Mar2011 | 1674  | 463.73  | -6.59518 | 2 R.TTADYTV chrX@939    | 1.79E-10 | 0.00406  |
| 31Mar2011 | 5743  | 1017.59 | -22.5744 | 1 R.SSVIMLIV chr2@576   | 1.88E-11 | 5.15E-04 |
| 31Mar2011 | 1149  | 562.31  | -13.4391 | 2 R.FYLLYLYK Splice@chr | 9.37E-11 | 0.002338 |
| 31Mar2011 | 13428 | 828.38  | -20.1128 | 2 K.PNLK+14 chr2@386    | 3.35E-10 | 0.008515 |
| 31Mar2011 | 5938  | 509.3   | -20.473  | 2 R.SSVIMLIV chr2@576   | 6.50E-11 | 0.001902 |
| 31Mar2011 | 5785  | 509.8   | -23.773  | 2 R.SSVIMLIV chr2@576   | 5.15E-11 | 0.001209 |
| 31Mar2011 | 11941 | 1003.19 | 17.13413 | 3 R.CWNRRA Splice@chr   | 2.58E-12 | 0        |
| 31Mar2011 | 9436  | 753.96  | 0.162122 | 2 K.K+14.016 chr2@137   | 1.23E-10 | 0.00344  |
| 31Mar2011 | 5432  | 571.86  | -2.35222 | 2 T.KKGDIVEI chr5@123   | 3.68E-10 | 0.009972 |
| 31Mar2011 | 4332  | 677.95  | 22.60469 | 2 R.QLKVIGR chrX@349    | 3.68E-10 | 0.009972 |
| 31Mar2011 | 5000  | 431.74  | 5.455516 | 2 _PIQDVYK Splice@chr   | 2.44E-10 | 0.006645 |
| 31Mar2011 | 5270  | 456.75  | -25.512  | 2 K.ITLESPR chr5@511    | 1.39E-10 | 0.003862 |
| 31Mar2011 | 4811  | 476.73  | -8.21113 | 2 R.SSHEISHF chr5@149   | 2.21E-10 | 0.006031 |

|           |       |         |          |                          |          |          |
|-----------|-------|---------|----------|--------------------------|----------|----------|
| 31Mar2011 | 9015  | 833.93  | -9.2006  | 2 _..IIEPYVAV Splice@chr | 1.01E-10 | 0.002772 |
| 31Mar2011 | 8115  | 671.37  | -24.0361 | 2 T.FNIVHTQ Splice@chr   | 9.64E-11 | 0.002338 |
| 31Mar2011 | 1092  | 464.24  | -7.11495 | 2 K.ETSFSTKk chr4@8236   | 1.52E-10 | 0.003862 |
| 31Mar2011 | 656   | 452.23  | -1.48793 | 2 R.SGEPLSA: Splice@chr  | 8.09E-11 | 0.002338 |
| 31Mar2011 | 5486  | 571.86  | -2.35222 | 2 T.KKGDIVEI chr5@1238   | 3.60E-10 | 0.00934  |
| 31Mar2011 | 7632  | 606.86  | 28.10799 | 2 R.VLPTVFY, chr5@1167   | 1.11E-10 | 0.002772 |
| 31Mar2011 | 12772 | 491.64  | 23.22207 | 3 R.LLLDKPLF Splice@chr  | 1.23E-10 | 0.00344  |
| 31Mar2011 | 7797  | 748.73  | -12.625  | 3 R.LPSKENL\ chr4@5639   | 1.32E-10 | 0.00344  |
| 31Mar2011 | 673   | 452.23  | -1.48793 | 2 R.SGEPLSA: Splice@chr  | 1.88E-10 | 0.00406  |
| 31Mar2011 | 1114  | 562.31  | -13.4391 | 2 R.FYLLYLYK Splice@chr  | 4.81E-11 | 0.001209 |
| 31Mar2011 | 9346  | 833.42  | -19.2103 | 2 _..IIEPYVAV Splice@chr | 3.72E-10 | 0.009972 |
| 31Mar2011 | 632   | 452.23  | -1.48793 | 2 R.SGEPLSA: Splice@chr  | 1.47E-10 | 0.003862 |
| 31Mar2011 | 5903  | 1017.59 | -22.5744 | 1 R.SSVIMLIV chr2@5767   | 1.88E-11 | 5.15E-04 |
| 31Mar2011 | 8948  | 607     | -9.70672 | 3 I.NRFNISK chrX@1250    | 9.15E-11 | 0.002338 |
| 31Mar2011 | 5848  | 1017.59 | -22.5744 | 1 R.SSVIMLIV chr2@5767   | 3.00E-10 | 0.007876 |
| 31Mar2011 | 5736  | 509.8   | -23.773  | 2 R.SSVIMLIV chr2@5767   | 4.54E-11 | 0.001209 |
| 31Mar2011 | 10169 | 785.42  | 22.95449 | 1 _..MPAWAF chr2@1115    | 2.85E-11 | 9.83E-04 |
| 31Mar2011 | 9058  | 517.95  | -0.39357 | 3 K.LICMKRS Splice@chr   | 2.98E-10 | 0.007876 |
| 31Mar2011 | 5795  | 1017.59 | -22.5744 | 1 R.SSVIMLIV chr2@5767   | 1.88E-11 | 5.15E-04 |
| 31Mar2011 | 5892  | 509.3   | -20.473  | 2 R.SSVIMLIV chr2@5767   | 4.54E-11 | 0.001209 |
| 31Mar2011 | 4981  | 1116.65 | 11.05125 | 1 K.INLKVNSI chr2@7016   | 2.84E-10 | 0.007486 |
| 31Mar2011 | 9479  | 753.96  | 0.162122 | 2 K.K+14.016 chr2@1375   | 4.86E-11 | 0.001209 |
| 31Mar2011 | 13243 | 970.45  | -29.5364 | 3 _..VACNKM Splice@chr   | 6.17E-11 | 0.001439 |
| 31Mar2011 | 6834  | 732.07  | 18.62774 | 3 R.VHPWYIY chrX@7314    | 2.45E-10 | 0.006645 |
| 31Mar2011 | 1063  | 464.24  | -7.11495 | 2 K.ETSFSTKk chr4@8236   | 2.71E-10 | 0.00727  |
| 31Mar2011 | 5838  | 509.3   | -20.473  | 2 R.SSVIMLIV chr2@5767   | 3.30E-11 | 9.83E-04 |
| 31Mar2011 | 11549 | 868.47  | -17.3524 | 2 L.FLWSK+1 chr2@1462    | 3.59E-10 | 0.009124 |
| 31Mar2011 | 11569 | 889.5   | 13.53314 | 2 F.KCRKMVI Splice@chr   | 1.81E-10 | 0.00406  |
| 31Mar2011 | 8043  | 881.47  | 19.52679 | 2 A.HRK+14.( chr5@1438   | 2.37E-10 | 0.00645  |
| 31Mar2011 | 643   | 452.23  | -1.48793 | 2 R.SGEPLSA: Splice@chr  | 5.03E-11 | 0.001209 |
| 31Mar2011 | 2003  | 423.21  | -13.0106 | 2 K.YLFSGMK chr5@8268    | 4.58E-10 | 0.006072 |
| 31Mar2011 | 8180  | 833.93  | -9.2006  | 2 _..IIEPYVAV Splice@chr | 6.81E-10 | 0.009263 |
| 31Mar2011 | 6913  | 671.37  | -24.0361 | 2 T.FNIVHTQ Splice@chr   | 2.39E-10 | 0.003527 |
| 31Mar2011 | 8933  | 965.77  | 16.46969 | 4 R.K+14.016 chr5@2085   | 6.97E-10 | 0.009439 |
| 31Mar2011 | 1922  | 707.37  | -3.97474 | 1 K.GGFLGEK chr4@1416    | 4.40E-10 | 0.005897 |
| 31Mar2011 | 6001  | 1075.06 | -6.79295 | 2 R.TCSK+14. chr2@1253   | 2.02E-10 | 0.002581 |
| 31Mar2011 | 3473  | 533.82  | 16.26677 | 2 K.TNIYTILT chr5@1329   | 4.22E-10 | 0.005897 |
| 31Mar2011 | 7165  | 554.26  | 6.682444 | 2 R.M+15.99 Splice@chr   | 3.36E-10 | 0.004061 |
| 31Mar2011 | 9046  | 1005.47 | -16.3827 | 2 K.KVELALV Splice@chr   | 1.04E-21 | 0        |
| 31Mar2011 | 11369 | 634.84  | 6.410455 | 2 R.VDIGDILF Splice@chr  | 1.24E-12 | 0        |
| 31Mar2011 | 10591 | 665.37  | -26.6417 | 2 Q.INNK+14 Splice@chr   | 5.06E-10 | 0.006925 |
| 31Mar2011 | 4857  | 456.75  | -25.512  | 2 K.ITLESPR chr5@5111    | 1.86E-10 | 0.002581 |
| 31Mar2011 | 8525  | 744.39  | 26.99177 | 2 L.FTENLTT chr5@1256    | 3.90E-10 | 0.005366 |
| 31Mar2011 | 5844  | 586.34  | 11.36604 | 2 R.LVILFFLF chr2@6458   | 4.59E-10 | 0.006261 |
| 31Mar2011 | 8791  | 685.68  | 0.744284 | 3 E.VFEVQSG chrX@3919    | 6.54E-10 | 0.008177 |
| 31Mar2011 | 7207  | 833.41  | -5.13266 | 2 _..IDM+15.( chrX@3237  | 4.24E-11 | 4.14E-04 |
| 31Mar2011 | 11872 | 959.04  | 19.81385 | 2 Y.NNCKLNS chrX@1250    | 9.96E-11 | 6.17E-04 |

|           |       |         |          |                          |          |          |
|-----------|-------|---------|----------|--------------------------|----------|----------|
| 31Mar2011 | 2350  | 936.48  | 27.86052 | 1 K.LNGGYEC chr2@1191    | 1.75E-11 | 0        |
| 31Mar2011 | 5712  | 517.96  | 7.005376 | 3 K.NLK+14.C chr5@1571   | 6.05E-10 | 0.007468 |
| 31Mar2011 | 12452 | 809.01  | -7.47824 | 2 R.FTTELLLL chr3@8986   | 3.61E-10 | 0.004613 |
| 31Mar2011 | 11397 | 634.84  | 6.410455 | 2 R.VDIGDILF Splice@chr  | 6.40E-13 | 0        |
| 31Mar2011 | 3524  | 533.82  | 16.26677 | 2 K.TNIYTILTI chr5@1329  | 6.23E-10 | 0.007813 |
| 31Mar2011 | 2258  | 437.23  | -20.8939 | 3 I.LVWGGG\ chrX@2603    | 5.54E-10 | 0.006925 |
| 31Mar2011 | 8326  | 762.43  | 16.40509 | 2 _..MK+14.0 chr4@7749   | 3.68E-10 | 0.004613 |
| 31Mar2011 | 5340  | 509.8   | -23.773  | 2 R.SSVIMLIV chr2@5767   | 5.33E-11 | 4.14E-04 |
| 31Mar2011 | 8312  | 858.48  | 6.006088 | 3 _..LETGIKPI Splice@chr | 1.52E-11 | 0        |
| 31Mar2011 | 4322  | 450.59  | 14.30023 | 3 R.ISSLSVVE chrX@1634   | 1.67E-11 | 0        |
| 31Mar2011 | 5845  | 825.96  | -15.1379 | 2 R.SARENKT Splice@chr   | 1.62E-10 | 0.002403 |
| 31Mar2011 | 990   | 643.82  | -13.9575 | 2 R.M+15.99 chr5@1877    | 4.61E-10 | 0.006443 |
| 31Mar2011 | 8742  | 622.33  | 9.587405 | 2 R.AK+14.01 chr2@4270   | 2.68E-10 | 0.003714 |
| 31Mar2011 | 6765  | 671.37  | -24.0361 | 2 T.FNIVHTQ Splice@chr   | 5.71E-10 | 0.006925 |
| 31Mar2011 | 1560  | 536.29  | -10.9462 | 2 _..QVEFNPII Splice@chr | 1.91E-11 | 0        |
| 31Mar2011 | 8118  | 607     | -9.70672 | 3 I.NRFNISK chrX@1250    | 1.10E-10 | 0.001228 |
| 31Mar2011 | 2428  | 936.48  | 27.86052 | 1 K.LNGGYEC chr2@1191    | 2.40E-10 | 0.003527 |
| 31Mar2011 | 12003 | 1147.24 | 4.705638 | 3 R.FQSAAG Splice@chr    | 2.89E-16 | 0        |
| 31Mar2011 | 5390  | 509.8   | -23.773  | 2 R.SSVIMLIV chr2@5767   | 5.89E-11 | 4.14E-04 |
| 31Mar2011 | 7119  | 606.34  | -12.1581 | 2 C.AK+14.01 chr2@2907   | 3.41E-10 | 0.00425  |
| 31Mar2011 | 10846 | 1003.19 | 17.13413 | 3 R.CWNRRA Splice@chr    | 5.59E-13 | 0        |
| 31Mar2011 | 6807  | 671.37  | -24.0361 | 2 T.FNIVHTQ Splice@chr   | 1.30E-10 | 0.001824 |
| 31Mar2011 | 2387  | 936.48  | 27.86052 | 1 K.LNGGYEC chr2@1191    | 4.19E-11 | 4.14E-04 |
| 31Mar2011 | 8354  | 858.48  | 6.006088 | 3 _..LETGIKPI Splice@chr | 8.73E-12 | 0        |
| 31Mar2011 | 11966 | 968.17  | -29.3651 | 3 R.FFYNIFAL chrX@4722   | 1.01E-10 | 6.17E-04 |
| 31Mar2011 | 6859  | 671.37  | -24.0361 | 2 T.FNIVHTQ Splice@chr   | 4.17E-10 | 0.005897 |
| 31Mar2011 | 2105  | 741.38  | -23.1647 | 2 K.FPENRHI\ chr2@1477   | 4.08E-10 | 0.005733 |
| 31Mar2011 | 7891  | 599.31  | -27.679  | 3 R.FTELLAC\ chr2@1991   | 1.15E-10 | 0.001425 |
| 31Mar2011 | 2144  | 741.39  | -17.2291 | 2 K.QKSNWH chr5@1229     | 1.26E-11 | 0        |
| 31Mar2011 | 9996  | 742.88  | -6.21424 | 2 K.M+15.99 chr4@1648    | 3.76E-10 | 0.004993 |
| 31Mar2011 | 7232  | 700.37  | 11.86921 | 2 N.EWK+14. chrX@4292    | 5.64E-10 | 0.006925 |
| 31Mar2011 | 8902  | 782.88  | -11.6312 | 2 K.FFFFEKF Splice@chr   | 6.38E-10 | 0.007813 |
| 31Mar2011 | 11673 | 968.13  | 18.26018 | 3 _..GCSIVPIS Splice@chr | 4.17E-11 | 4.14E-04 |
| 31Mar2011 | 8597  | 753.96  | 0.162122 | 2 K.K+14.016 chr2@1375   | 5.80E-11 | 4.14E-04 |
| 31Mar2011 | 1577  | 493.61  | 28.00299 | 3 _..FQRHNLN chrX@1408   | 2.90E-10 | 0.004061 |
| 31Mar2011 | 5953  | 1075.06 | -6.79295 | 2 R.TCSK+14. chr2@1253   | 4.76E-10 | 0.006608 |
| 31Mar2011 | 2185  | 741.38  | -23.1647 | 2 K.FPENRHI\ chr2@1477   | 2.45E-10 | 0.003527 |
| 31Mar2011 | 7005  | 671.37  | -24.0361 | 2 T.FNIVHTQ Splice@chr   | 6.13E-10 | 0.007642 |
| 31Mar2011 | 1366  | 417.72  | -18.1617 | 2 K.WTTSALF chr5@2081    | 2.32E-10 | 0.003437 |
| 31Mar2011 | 3946  | 758.92  | -4.47097 | 2 C.RGQKEEN chr1@5362    | 6.70E-11 | 8.04E-04 |
| 31Mar2011 | 8122  | 855.41  | -22.1447 | 2 _..HVQEVAI Splice@chr  | 2.43E-10 | 0.003437 |
| 31Mar2011 | 2565  | 936.48  | 27.86052 | 1 K.LNGGYEC chr2@1191    | 4.37E-11 | 6.23E-04 |
| 31Mar2011 | 3905  | 758.92  | -4.47097 | 2 C.RGQKEEN chr1@5362    | 9.36E-11 | 8.04E-04 |
| 31Mar2011 | 10952 | 1007.86 | 15.19559 | 3 R.CWNRRA Splice@chr    | 2.01E-10 | 0.002695 |
| 31Mar2011 | 12379 | 910.51  | -22.3017 | 1 R.VRLGDPP chr2@6150    | 2.09E-10 | 0.003075 |
| 31Mar2011 | 1796  | 563.77  | 17.1364  | 2 R.ETYTDGE chr5@1466    | 5.37E-10 | 0.007348 |
| 31Mar2011 | 10503 | 754.1   | 20.46108 | 3 _..DLLEALD\ Splice@chr | 5.76E-10 | 0.007875 |

|           |       |         |          |                         |          |          |
|-----------|-------|---------|----------|-------------------------|----------|----------|
| 31Mar2011 | 3435  | 434.24  | 13.9946  | 3 _RSNDQTI chr5@6378    | 1.25E-10 | 0.001384 |
| 31Mar2011 | 11883 | 1147.24 | 4.705638 | 3 R.FQSAAIG Splice@chr  | 4.72E-16 | 0        |
| 31Mar2011 | 6133  | 717.04  | 7.989016 | 3 K.YKINTDEI chr2@5566  | 6.28E-10 | 0.008566 |
| 31Mar2011 | 5535  | 688.03  | -17.0347 | 3 L.IFK+14.01 chr3@8836 | 3.79E-10 | 0.005798 |
| 31Mar2011 | 6931  | 671.37  | -24.0361 | 2 T.FNIVHTQ Splice@chr  | 4.51E-10 | 0.006638 |
| 31Mar2011 | 8230  | 648.86  | -13.0566 | 2 R.QM+15.9 chr3@9694   | 4.16E-10 | 0.005958 |
| 31Mar2011 | 2389  | 741.39  | -17.2291 | 2 K.QKSNWH chr5@1229    | 5.04E-11 | 6.23E-04 |
| 31Mar2011 | 7450  | 1075.05 | -16.1169 | 2 R.TCSK+14. chr2@1253  | 1.32E-10 | 0.001566 |
| 31Mar2011 | 2020  | 707.38  | 10.19607 | 1 K.GGFLGEK chr4@1416   | 4.40E-10 | 0.006485 |
| 31Mar2011 | 77    | 773.43  | 3.950909 | 1 R.EAKAGA chr1@6054    | 5.92E-10 | 0.007875 |
| 31Mar2011 | 10087 | 928.01  | 17.71166 | 2 R.K+14.016 chr5@2010  | 5.78E-10 | 0.007875 |
| 31Mar2011 | 2271  | 713.06  | -21.1431 | 3 K.TKIK+14.1 chrX@3026 | 2.57E-10 | 0.003609 |
| 31Mar2011 | 2131  | 423.21  | -13.0106 | 2 K.YLFSGMK chr5@8268   | 4.62E-10 | 0.006638 |
| 31Mar2011 | 5611  | 829.89  | -16.1259 | 2 R.FEVFEIEC chr4@7299  | 4.90E-10 | 0.006638 |
| 31Mar2011 | 8547  | 753.96  | 0.162122 | 2 K.K+14.016 chr2@1375  | 1.20E-10 | 0.001384 |
| 31Mar2011 | 2345  | 741.39  | -17.2291 | 2 K.QKSNWH chr5@1229    | 4.09E-11 | 6.23E-04 |
| 31Mar2011 | 2303  | 741.39  | -17.2291 | 2 K.QKSNWH chr5@1229    | 2.48E-11 | 2.15E-04 |
| 31Mar2011 | 7782  | 728.05  | 5.820564 | 3 R.KYAITYST chr5@3922  | 6.35E-10 | 0.008566 |
| 31Mar2011 | 5267  | 764.93  | -22.5039 | 2 K.NARKQEI chr4@1670   | 2.95E-10 | 0.003968 |
| 31Mar2011 | 9009  | 1005.47 | -16.3827 | 2 K.KVELALM Splice@chr  | 7.94E-23 | 0        |
| 31Mar2011 | 11274 | 634.84  | 6.410455 | 2 R.VDIGDILF Splice@chr | 1.26E-12 | 0        |
| 31Mar2011 | 11876 | 1147.24 | 4.705638 | 3 R.FQSAAIG Splice@chr  | 1.27E-13 | 0        |
| 31Mar2011 | 8299  | 858.48  | 6.006088 | 3 _LETGIKPI Splice@chr  | 7.18E-13 | 0        |
| 31Mar2011 | 6186  | 1075.06 | -6.79295 | 2 R.TCSK+14. chr2@1253  | 3.44E-10 | 0.005069 |
| 31Mar2011 | 11856 | 1116.22 | 16.71106 | 3 K.QAFDDAI Splice@chr  | 1.59E-11 | 2.15E-04 |
| 31Mar2011 | 6884  | 671.37  | -24.0361 | 2 T.FNIVHTQ Splice@chr  | 4.50E-10 | 0.006638 |
| 31Mar2011 | 9095  | 983.97  | 4.629411 | 2 R.SFSTIPDS chr2@1305  | 9.84E-17 | 0        |
| 31Mar2011 | 11300 | 634.84  | 6.410455 | 2 R.VDIGDILF Splice@chr | 6.32E-13 | 0        |
| 31Mar2011 | 8073  | 962.49  | 24.16856 | 2 R.AYFHVTM chr1@1005   | 3.80E-11 | 4.24E-04 |
| 31Mar2011 | 10851 | 884.41  | -1.81927 | 3 R.YRVDLAF chr5@6435   | 1.33E-10 | 0.001566 |
| 31Mar2011 | 6842  | 671.37  | -24.0361 | 2 T.FNIVHTQ Splice@chr  | 2.39E-10 | 0.003437 |
| 31Mar2011 | 11734 | 959.54  | 18.06294 | 2 Y.NNCKLNS chrX@1250   | 2.49E-10 | 0.003609 |
| 31Mar2011 | 10534 | 754.1   | 20.46108 | 3 _DLLEALD Splice@chr   | 6.10E-10 | 0.008227 |
| 31Mar2011 | 9171  | 785.42  | 22.95449 | 1 _MPAWAF chr2@1115     | 2.85E-11 | 2.15E-04 |
| 31Mar2011 | 6250  | 1004.81 | -8.08885 | 3 K.AVMFTVI Splice@chr  | 8.84E-15 | 0        |
| 31Mar2011 | 6806  | 671.37  | -24.0361 | 2 T.FNIVHTQ Splice@chr  | 6.58E-10 | 0.009098 |
| 31Mar2011 | 2267  | 741.39  | -17.2291 | 2 K.QKSNWH chr5@1229    | 2.92E-11 | 2.15E-04 |
| 31Mar2011 | 9486  | 747.39  | 13.7081  | 2 K.MLRFNEC chr2@8355   | 3.72E-10 | 0.005429 |
| 31Mar2011 | 8605  | 505.25  | 2.602438 | 2 K.HVFNQF chrX@3830    | 1.94E-10 | 0.007316 |
| 31Mar2011 | 5431  | 509.8   | -23.773  | 2 R.SSVIMLIV chr2@5767  | 3.76E-11 | 0.001646 |
| 31Mar2011 | 5477  | 509.8   | -23.773  | 2 R.SSVIMLIV chr2@5767  | 5.12E-11 | 0.001908 |
| 31Mar2011 | 2396  | 936.48  | 27.86052 | 1 K.LNGGYEC chr2@1191   | 1.79E-11 | 8.66E-04 |
| 31Mar2011 | 3986  | 1025.61 | -11.6755 | 1 K.LGLGSGL chr5@4945   | 2.24E-11 | 0.001422 |
| 31Mar2011 | 3787  | 677.95  | 22.60469 | 2 R.QLKVIGR chrX@3498   | 1.27E-10 | 0.004401 |
| 31Mar2011 | 2208  | 741.39  | -17.2291 | 2 K.QKSNWH chr5@1229    | 1.18E-10 | 0.004401 |
| 31Mar2011 | 9257  | 785.42  | 22.95449 | 1 _MPAWAF chr2@1115     | 4.10E-11 | 0.001646 |
| 31Mar2011 | 4383  | 476.73  | -8.21113 | 2 R.SSHEISHF chr5@1494  | 7.78E-11 | 0.002932 |

|           |       |         |          |                         |          |          |
|-----------|-------|---------|----------|-------------------------|----------|----------|
| 31Mar2011 | 2775  | 423.26  | 23.30279 | 2 K.LGAETVV chr2@6180   | 1.87E-10 | 0.006877 |
| 31Mar2011 | 6891  | 671.37  | -24.0361 | 2 T.FNIVHTQ Splice@chr  | 1.83E-10 | 0.006877 |
| 31Mar2011 | 5390  | 509.8   | -23.773  | 2 R.SSVIMLIV chr2@5767  | 5.33E-11 | 0.002163 |
| 31Mar2011 | 991   | 562.31  | -13.4391 | 2 R.FYLLYLYK Splice@chr | 5.43E-11 | 0.002163 |
| 31Mar2011 | 12341 | 859.96  | -5.29561 | 2 _FISVQFHI chr3@7969   | 2.47E-10 | 0.00877  |
| 31Mar2011 | 5541  | 1017.59 | -22.5744 | 1 R.SSVIMLIV chr2@5767  | 1.84E-10 | 0.006877 |
| 31Mar2011 | 3478  | 423.26  | -10.6    | 3 R.VGHELLV Splice@chr  | 2.30E-10 | 0.007797 |
| 31Mar2011 | 5524  | 509.8   | -23.773  | 2 R.SSVIMLIV chr2@5767  | 7.06E-11 | 0.002676 |
| 31Mar2011 | 5447  | 1017.59 | -22.5744 | 1 R.SSVIMLIV chr2@5767  | 1.94E-10 | 0.007316 |
| 31Mar2011 | 2951  | 583.79  | -23.2497 | 2 R.YLAAAAC chr5@9265   | 1.82E-10 | 0.006877 |
| 31Mar2011 | 4283  | 927.5   | 17.85317 | 1 R.NMIVHG chr1@7221    | 1.40E-10 | 0.004902 |
| 31Mar2011 | 11451 | 634.84  | 6.410455 | 2 R.VDIGDILF Splice@chr | 4.00E-13 | 0        |
| 31Mar2011 | 10911 | 1003.19 | 17.13413 | 3 R.CWNRRA Splice@chr   | 2.54E-11 | 0.001422 |
| 31Mar2011 | 9300  | 785.42  | 22.95449 | 1 _MPAWAF chr2@1115     | 3.76E-11 | 0.001646 |
| 31Mar2011 | 3980  | 529.6   | -12.9775 | 3 _AFHESKLI chrX@3405   | 5.80E-12 | 2.96E-04 |
| 31Mar2011 | 9802  | 835.45  | -7.2977  | 4 R.K+14.016 chrX@9996  | 1.71E-10 | 0.006387 |
| 31Mar2011 | 8669  | 753.96  | 0.162122 | 2 K.K+14.016 chr2@1375  | 1.40E-10 | 0.004902 |
| 31Mar2011 | 4509  | 584.69  | -9.76929 | 5 _TVFYGDL chr4@5567    | 1.78E-10 | 0.006636 |
| 31Mar2011 | 8631  | 753.96  | 0.162122 | 2 K.K+14.016 chr2@1375  | 2.32E-11 | 0.001422 |
| 31Mar2011 | 8864  | 514.52  | 26.86268 | 4 K.LSCFKHG chrX@1464   | 1.88E-10 | 0.007316 |
| 31Mar2011 | 1787  | 626.82  | -18.5922 | 2 W.QFDLGK Splice@chr   | 1.32E-10 | 0.004401 |
| 31Mar2011 | 9869  | 677.33  | 1.082949 | 2 R.KMDNCS chr5@1865    | 6.62E-10 | 0.009304 |
| 31Mar2011 | 7329  | 1120.59 | -14.8281 | 2 T.RFNFTI chr2@1312    | 2.24E-10 | 0.003036 |
| 31Mar2011 | 10734 | 634.84  | 6.410455 | 2 R.VDIGDILF Splice@chr | 5.03E-12 | 2.35E-04 |
| 31Mar2011 | 1198  | 493.61  | 28.00299 | 3 _FQRHNLN chrX@1408    | 2.47E-10 | 0.003036 |
| 31Mar2011 | 10929 | 491.64  | 23.22207 | 3 R.LLLDKPLF Splice@chr | 3.62E-10 | 0.004969 |
| 31Mar2011 | 7457  | 833.93  | -9.2006  | 2 _IIEPYVAV Splice@chr  | 2.68E-10 | 0.003432 |
| 31Mar2011 | 8122  | 514.52  | 26.86268 | 4 K.LSCFKHG chrX@1464   | 4.90E-10 | 0.006879 |
| 31Mar2011 | 2949  | 527.95  | 11.73747 | 3 K.SVVSISSE chr4@1045  | 6.27E-10 | 0.008159 |
| 31Mar2011 | 5028  | 673.32  | -23.1345 | 4 _QVREMH Splice@chr    | 1.56E-10 | 0.002482 |
| 31Mar2011 | 7793  | 803.43  | 10.08618 | 2 R.FGFEES chr3@6206    | 5.08E-10 | 0.007066 |
| 31Mar2011 | 6546  | 625.07  | -26.1127 | 4 R.M+15.99 chrX@6806   | 8.16E-11 | 8.56E-04 |
| 31Mar2011 | 6131  | 671.37  | -24.0361 | 2 T.FNIVHTQ Splice@chr  | 6.17E-10 | 0.008159 |
| 31Mar2011 | 1147  | 418.89  | -10.5715 | 3 R.ENFATKC chr5@5231   | 2.09E-10 | 0.002658 |
| 31Mar2011 | 10323 | 1003.19 | 17.13413 | 3 R.CWNRRA Splice@chr   | 2.20E-10 | 0.002858 |
| 31Mar2011 | 6230  | 606.86  | 28.10799 | 2 R.VLPTVFY chr5@1167   | 4.13E-11 | 6.59E-04 |
| 31Mar2011 | 9578  | 732.07  | 19.51873 | 3 R.ATDDWII Splice@chr  | 5.69E-10 | 0.007811 |
| 31Mar2011 | 7381  | 606.67  | -2.35139 | 3 I.NRFNISK chrX@1250   | 9.89E-11 | 0.001272 |
| 31Mar2011 | 2230  | 566.81  | 0.647242 | 2 I.RIPLDYAE chr5@2047  | 8.28E-11 | 8.56E-04 |
| 31Mar2011 | 7991  | 1090.53 | -18.1295 | 2 K.INGVTVA chr3@6296   | 5.42E-11 | 8.56E-04 |
| 31Mar2011 | 7172  | 580.66  | 3.439687 | 3 _LDLFEYSI chr3@2551   | 4.07E-10 | 0.005937 |
| 31Mar2011 | 7612  | 858.48  | 6.006088 | 3 _LETGIKPI Splice@chr  | 2.23E-13 | 0        |
| 31Mar2011 | 9641  | 1039.04 | 7.526316 | 2 R.NSVANIG Splice@chr  | 2.98E-20 | 0        |
| 31Mar2011 | 5315  | 1075.06 | -6.79295 | 2 R.TCSK+14 chr2@1255   | 2.11E-10 | 0.002658 |
| 31Mar2011 | 755   | 464.24  | -7.11495 | 2 K.ETSFSTK chr4@8236   | 1.35E-10 | 0.001879 |
| 31Mar2011 | 7916  | 753.96  | 0.162122 | 2 K.K+14.016 chr2@1375  | 5.08E-11 | 8.56E-04 |
| 31Mar2011 | 10546 | 973.46  | 12.72037 | 3 _CSIRPISG Splice@chr  | 1.98E-11 | 6.59E-04 |

|           |       |         |          |                         |          |          |
|-----------|-------|---------|----------|-------------------------|----------|----------|
| 31Mar2011 | 8012  | 622.33  | 9.587405 | 2 R.AK+14.01 chr2@4270  | 3.40E-10 | 0.004798 |
| 31Mar2011 | 6802  | 671.87  | -26.5383 | 2 T.FNIVHTQ Splice@chr  | 4.01E-10 | 0.005937 |
| 31Mar2011 | 6287  | 671.37  | -24.0361 | 2 T.FNIVHTQ Splice@chr  | 5.13E-10 | 0.007066 |
| 31Mar2011 | 10980 | 968.13  | 18.26018 | 3 _GCSIVPIS Splice@chr  | 3.60E-10 | 0.004969 |
| 31Mar2011 | 9810  | 868.47  | -17.3524 | 2 L.FLWSK+1 chr2@1462   | 4.19E-10 | 0.005937 |
| 31Mar2011 | 1942  | 936.48  | 27.86052 | 1 K.LNGGYEC chr2@1191   | 6.53E-11 | 8.56E-04 |
| 31Mar2011 | 8031  | 833.42  | -19.2103 | 2 _IIEPYVAV Splice@chr  | 6.22E-11 | 8.56E-04 |
| 31Mar2011 | 6082  | 671.37  | -24.0361 | 2 T.FNIVHTQ Splice@chr  | 5.37E-10 | 0.007439 |
| 31Mar2011 | 8549  | 785.42  | 22.95449 | 1 _MPAWAF chr2@1115     | 1.12E-10 | 0.001467 |
| 31Mar2011 | 10331 | 1007.86 | 15.19559 | 3 R.CWNRRRA Splice@chr  | 1.23E-10 | 0.001467 |
| 31Mar2011 | 12140 | 972.49  | -17.4814 | 1 R.RTHQHH Splice@chr   | 1.68E-10 | 0.002482 |
| 31Mar2011 | 7414  | 833.93  | -9.2006  | 2 _IIEPYVAV Splice@chr  | 6.78E-11 | 8.56E-04 |
| 31Mar2011 | 6239  | 671.37  | -24.0361 | 2 T.FNIVHTQ Splice@chr  | 3.13E-10 | 0.00401  |
| 31Mar2011 | 8504  | 785.42  | 22.95449 | 1 _MPAWAF chr2@1115     | 3.41E-11 | 6.59E-04 |
| 31Mar2011 | 6188  | 671.37  | -24.0361 | 2 T.FNIVHTQ Splice@chr  | 6.41E-10 | 0.008731 |
| 31Mar2011 | 7873  | 753.96  | 0.162122 | 2 K.K+14.016 chr2@1375  | 1.34E-10 | 0.001672 |
| 31Mar2011 | 9778  | 868.47  | -17.3524 | 2 L.FLWSK+1 chr2@1462   | 3.47E-10 | 0.004969 |
| 31Mar2011 | 9326  | 753.96  | 0.162122 | 2 K.K+14.016 chr2@1375  | 4.54E-11 | 3.77E-04 |
| 31Mar2011 | 4869  | 450.59  | 14.30023 | 3 R.ISSLSVVE chrX@1634  | 2.16E-10 | 0.002604 |
| 31Mar2011 | 10035 | 778.9   | -26.6764 | 2 R.EWNVVN chr1@1438    | 7.66E-10 | 0.009946 |
| 31Mar2011 | 3552  | 583.79  | -23.2497 | 2 R.YLAAAAC chr5@9265   | 6.25E-10 | 0.00776  |
| 31Mar2011 | 1182  | 464.24  | -7.11495 | 2 K.ETSFSTKk chr4@8236  | 5.04E-10 | 0.006341 |
| 31Mar2011 | 1243  | 562.31  | -13.4391 | 2 R.FYLLYLYK Splice@chr | 4.83E-11 | 3.77E-04 |
| 31Mar2011 | 8667  | 760.92  | 4.096271 | 2 R.FLIDISCV Splice@chr | 1.16E-11 | 1.92E-04 |
| 31Mar2011 | 13469 | 809.01  | -7.47824 | 2 R.FTTELLLL chr3@8986  | 3.91E-10 | 0.005424 |
| 31Mar2011 | 1217  | 464.24  | -7.11495 | 2 K.ETSFSTKk chr4@8236  | 3.14E-10 | 0.00411  |
| 31Mar2011 | 6227  | 829.89  | -16.1259 | 2 R.FEVFEIEC chr4@7295  | 6.65E-10 | 0.008387 |
| 31Mar2011 | 2915  | 936.48  | 27.86052 | 1 K.LNGGYEC chr2@1191   | 2.16E-11 | 1.92E-04 |
| 31Mar2011 | 9052  | 858.48  | 6.006088 | 3 _LETGIKPI Splice@chr  | 3.63E-12 | 0        |
| 31Mar2011 | 9766  | 759.4   | -15.0495 | 2 K.FIDANLQ chr4@8206   | 1.69E-10 | 0.001412 |
| 31Mar2011 | 4372  | 1025.61 | -11.6755 | 1 K.LGLGSGL chr5@4945   | 1.35E-11 | 1.92E-04 |
| 31Mar2011 | 7411  | 671.37  | -24.0361 | 2 T.FNIVHTQ Splice@chr  | 4.90E-10 | 0.006341 |
| 31Mar2011 | 7508  | 671.37  | -24.0361 | 2 T.FNIVHTQ Splice@chr  | 1.78E-10 | 0.00176  |
| 31Mar2011 | 9761  | 965.77  | 16.46969 | 4 R.KTSSCQK chr5@2085   | 1.90E-10 | 0.002105 |
| 31Mar2011 | 13618 | 1105.21 | -11.0549 | 3 K.LAFDDAI Splice@chr  | 2.83E-12 | 0        |
| 31Mar2011 | 13605 | 1105.21 | -11.0549 | 3 K.LAFDDAI Splice@chr  | 2.68E-13 | 0        |
| 31Mar2011 | 9526  | 622.33  | 9.587405 | 2 R.AK+14.01 chr2@4270  | 3.77E-10 | 0.005424 |
| 31Mar2011 | 1341  | 452.26  | -4.66636 | 2 R.VLHNAPF chr2@1406   | 7.82E-11 | 0.001063 |
| 31Mar2011 | 6360  | 897.42  | -27.6753 | 3 _QVREMH Splice@chr    | 3.27E-10 | 0.00411  |
| 31Mar2011 | 7915  | 700.37  | 11.86921 | 2 N.EWK+14. chrX@4292   | 5.70E-10 | 0.006958 |
| 31Mar2011 | 12872 | 959.04  | 19.81385 | 2 Y.NNCKLNS chrX@1250   | 7.56E-10 | 0.009946 |
| 31Mar2011 | 13059 | 1147.25 | 13.44098 | 3 R.FQSAAIG Splice@chr  | 2.32E-15 | 0        |
| 31Mar2011 | 12293 | 634.84  | 6.410455 | 2 R.VDIGDILF Splice@chr | 4.79E-13 | 0        |
| 31Mar2011 | 13762 | 954.51  | -0.25406 | 1 K.RIGHEWF chr5@7065   | 5.38E-10 | 0.006805 |
| 31Mar2011 | 9095  | 858.48  | 6.006088 | 3 _LETGIKPI Splice@chr  | 3.09E-14 | 0        |
| 31Mar2011 | 12528 | 491.64  | 23.22207 | 3 R.LLLDKPLF Splice@chr | 4.56E-10 | 0.005873 |
| 31Mar2011 | 10042 | 785.42  | 22.95449 | 1 _MPAWAF chr2@1115     | 2.85E-11 | 1.92E-04 |

|           |       |         |          |                         |          |          |
|-----------|-------|---------|----------|-------------------------|----------|----------|
| 31Mar2011 | 7585  | 671.37  | -24.0361 | 2 T.FNIVHTQ Splice@chr  | 4.84E-10 | 0.006188 |
| 31Mar2011 | 542   | 527.27  | -26.7558 | 2 K.VFPFAW chr5@1762    | 5.29E-10 | 0.006652 |
| 31Mar2011 | 9256  | 803.43  | 10.08618 | 2 R.FGFEEGS chr3@6206   | 3.53E-10 | 0.00494  |
| 31Mar2011 | 2654  | 543.29  | -5.17738 | 2 K.SLHQLLC chr1@1305   | 7.48E-10 | 0.009946 |
| 31Mar2011 | 2653  | 741.39  | -17.2291 | 2 K.QKSNWH chr5@1229    | 4.21E-11 | 3.77E-04 |
| 31Mar2011 | 1205  | 562.31  | -13.4391 | 2 R.FYLLYLYK Splice@chr | 4.96E-11 | 3.77E-04 |
| 31Mar2011 | 13051 | 1147.24 | 4.705638 | 3 R.FQSAAIG Splice@chr  | 7.09E-15 | 0        |
| 31Mar2011 | 9633  | 1075.57 | -5.83143 | 3 K.EIVSTDLE Splice@chr | 1.92E-10 | 0.002105 |
| 31Mar2011 | 11804 | 884.41  | -1.81927 | 3 R.YRVDLA chr5@6435    | 4.57E-11 | 3.77E-04 |
| 31Mar2011 | 9370  | 753.96  | 0.162122 | 2 K.K+14.016 chr2@1375  | 3.26E-11 | 1.92E-04 |
| 31Mar2011 | 6092  | 830.39  | -18.1496 | 2 R.FEVFEIEC chr4@7295  | 8.22E-11 | 0.001063 |
| 31Mar2011 | 3237  | 566.81  | 0.647242 | 2 I.RIPLDYAE chr5@2047  | 6.88E-11 | 0.001063 |
| 31Mar2011 | 3073  | 463.25  | -7.39427 | 3 K.ISQKKNTI Splice@chr | 6.27E-10 | 0.008078 |
| 31Mar2011 | 9486  | 622.33  | 9.587405 | 2 R.AK+14.01 chr2@4270  | 5.41E-10 | 0.006805 |
| 31Mar2011 | 6315  | 640.82  | -29.3809 | 4 K.SIQARKRI chr4@9242  | 6.22E-11 | 9.28E-04 |
| 31Mar2011 | 13334 | 1018.55 | -8.33756 | 2 K.LFPWRCI Splice@chr  | 3.80E-10 | 0.005424 |
| 31Mar2011 | 8850  | 606.66  | -18.8783 | 3 I.NRFNISK chrX@1250   | 1.80E-10 | 0.001935 |
| 31Mar2011 | 7456  | 671.37  | -24.0361 | 2 T.FNIVHTQ Splice@chr  | 6.61E-10 | 0.008387 |
| 31Mar2011 | 4939  | 616.33  | -16.7632 | 2 K.LSKSVIFQ chr3@2798  | 4.67E-10 | 0.008318 |
| 31Mar2011 | 7773  | 607     | -9.70672 | 3 I.NRFNISK chrX@1250   | 1.77E-10 | 0.001974 |
| 31Mar2011 | 10239 | 1039.04 | 7.526316 | 2 R.NSVANIG Splice@chr  | 3.53E-21 | 0        |
| 31Mar2011 | 3406  | 677.95  | 22.60469 | 2 R.QLKVIGR chrX@3498   | 7.47E-11 | 0.001028 |
| 31Mar2011 | 3408  | 517.96  | 7.005376 | 3 K.NLK+14.0 chr5@1571  | 3.63E-10 | 0.005358 |
| 31Mar2011 | 1288  | 493.61  | 28.00299 | 3 _FQRHNL chrX@1408     | 3.44E-10 | 0.005358 |
| 31Mar2011 | 5704  | 626.31  | 6.247018 | 2 K.SEELMYN chr4@2675   | 1.40E-13 | 0        |
| 31Mar2011 | 6405  | 671.37  | -24.0361 | 2 T.FNIVHTQ Splice@chr  | 5.77E-10 | 0.009918 |
| 31Mar2011 | 8332  | 753.96  | 0.162122 | 2 K.K+14.016 chr2@1375  | 1.49E-11 | 4.24E-04 |
| 31Mar2011 | 807   | 562.31  | -13.4391 | 2 R.FYLLYLYK Splice@chr | 4.72E-11 | 6.33E-04 |
| 31Mar2011 | 7814  | 607     | -9.70672 | 3 I.NRFNISK chrX@1250   | 9.85E-11 | 0.001222 |
| 31Mar2011 | 4155  | 431.74  | 5.455516 | 2 _PIQDVYK Splice@chr   | 2.81E-10 | 0.004256 |
| 31Mar2011 | 8374  | 753.96  | 0.162122 | 2 K.K+14.016 chr2@1375  | 6.45E-11 | 0.001028 |
| 31Mar2011 | 6767  | 833.41  | -5.13266 | 2 _IDM+15.5 chrX@3237   | 4.23E-10 | 0.006848 |
| 31Mar2011 | 4994  | 687.7   | -10.5473 | 3 L.IFK+14.01 chr3@8836 | 2.86E-10 | 0.004256 |
| 31Mar2011 | 4076  | 1116.65 | 11.05125 | 1 K.INLKVNSI chr2@7016  | 4.54E-10 | 0.008318 |
| 31Mar2011 | 787   | 464.24  | -7.11495 | 2 K.ETSFSTK chr4@8236   | 1.35E-10 | 0.001798 |
| 31Mar2011 | 9061  | 785.42  | 22.95449 | 1 _MPAWAF chr2@1115     | 2.29E-11 | 4.24E-04 |
| 31Mar2011 | 9994  | 742.88  | -6.21424 | 2 K.M+15.99 chr4@1648   | 4.64E-10 | 0.008318 |
| 31Mar2011 | 4937  | 509.8   | -23.773  | 2 R.SSVIMLIV chr2@5767  | 4.33E-11 | 4.24E-04 |
| 31Mar2011 | 10589 | 1028.98 | -26.3436 | 2 R.SQMDILC chrX@1395   | 5.45E-10 | 0.009747 |
| 31Mar2011 | 8416  | 753.96  | 0.162122 | 2 K.K+14.016 chr2@1375  | 4.49E-11 | 4.24E-04 |
| 31Mar2011 | 11705 | 968.13  | 18.26018 | 3 _GCSIVPIS Splice@chr  | 7.11E-12 | 4.24E-04 |
| 31Mar2011 | 9104  | 785.42  | 22.95449 | 1 _MPAWAF chr2@1115     | 1.74E-11 | 4.24E-04 |
| 31Mar2011 | 5443  | 825.96  | -15.1379 | 2 R.SARENKT Splice@chr  | 9.21E-11 | 0.001222 |
| 31Mar2011 | 4897  | 509.8   | -23.773  | 2 R.SSVIMLIV chr2@5767  | 1.88E-11 | 4.24E-04 |
| 31Mar2011 | 7201  | 671.87  | -26.5383 | 2 T.FNIVHTQ Splice@chr  | 4.87E-10 | 0.008497 |
| 31Mar2011 | 4407  | 456.75  | -25.512  | 2 K.ITLESPR chr5@5111   | 2.45E-10 | 0.002925 |
| 31Mar2011 | 2115  | 936.48  | 27.86052 | 1 K.LNGGYEC chr2@1191   | 1.17E-10 | 0.001412 |

|           |       |         |          |                         |          |          |
|-----------|-------|---------|----------|-------------------------|----------|----------|
| 31Mar2011 | 12128 | 1116.22 | 16.71106 | 3 K.QAFDDAI Splice@chr  | 2.66E-11 | 4.24E-04 |
| 31Mar2011 | 3605  | 461.59  | -10.1596 | 3 K.FLISK+14 Splice@chr | 3.00E-10 | 0.004445 |
| 31Mar2011 | 8905  | 1005.47 | -16.3827 | 2 K.KVELALW Splice@chr  | 2.57E-22 | 0        |
| 31Mar2011 | 10811 | 1003.19 | 17.13413 | 3 R.CWNRRA Splice@chr   | 5.65E-12 | 4.24E-04 |
| 31Mar2011 | 8096  | 858.48  | 6.006088 | 3 _LETGIKPI Splice@chr  | 1.35E-12 | 2.52E-04 |
| 31Mar2011 | 4167  | 1116.65 | 11.05125 | 1 K.INLKVNSI chr2@7016  | 4.29E-10 | 0.007416 |
| 31Mar2011 | 7907  | 833.93  | -9.2006  | 2 _IIEPYVAV Splice@chr  | 7.36E-11 | 0.001028 |
| 31Mar2011 | 818   | 464.24  | -7.11495 | 2 K.ETSFSTKk chr4@8236  | 3.32E-10 | 0.004995 |
| 31Mar2011 | 11012 | 1003.19 | 17.13413 | 3 R.CWNRRA Splice@chr   | 9.78E-12 | 4.24E-04 |
| 31Mar2011 | 6456  | 667.36  | 2.473097 | 2 R.RIQENYA Splice@chr  | 4.55E-10 | 0.008318 |
| 31Mar2011 | 6169  | 480.25  | -7.94261 | 3 R.IAKM+15 chr2@4765   | 2.02E-10 | 0.002351 |
| 31Mar2011 | 11646 | 491.64  | 23.22207 | 3 R.LLLDKPLF Splice@chr | 2.43E-10 | 0.002925 |
| 31Mar2011 | 10894 | 1003.19 | 17.13413 | 3 R.CWNRRA Splice@chr   | 3.39E-11 | 4.24E-04 |
| 31Mar2011 | 12655 | 1105.21 | -11.0549 | 3 K.LAFDDAI Splice@chr  | 6.71E-11 | 0.001028 |
| 31Mar2011 | 4984  | 509.8   | -23.773  | 2 R.SSVIMLIV chr2@5767  | 3.99E-11 | 4.24E-04 |
| 31Mar2011 | 7761  | 855.41  | -22.1447 | 2 _HVQEVAI Splice@chr   | 3.27E-11 | 4.24E-04 |
| 31Mar2011 | 4923  | 1017.59 | -22.5744 | 1 R.SSVIMLIV chr2@5767  | 1.88E-11 | 4.24E-04 |
| 31Mar2011 | 8053  | 858.48  | 6.006088 | 3 _LETGIKPI Splice@chr  | 7.30E-13 | 2.52E-04 |
| 31Mar2011 | 11428 | 634.84  | 6.410455 | 2 R.VDIGDILF Splice@chr | 3.74E-13 | 0        |
| 31Mar2011 | 7020  | 671.37  | -24.0361 | 2 T.FNIVHTQ Splice@chr  | 1.53E-10 | 0.001974 |
| 31Mar2011 | 4964  | 1017.59 | -22.5744 | 1 R.SSVIMLIV chr2@5767  | 5.42E-10 | 0.009574 |
| 31Mar2011 | 8980  | 785.42  | 22.95449 | 1 _MPAWAF chr2@1115     | 1.61E-11 | 2.13E-04 |
| 31Mar2011 | 8793  | 1141.62 | 4.816002 | 1 _YLFIDITLE chr2@1007  | 9.72E-11 | 8.13E-04 |
| 31Mar2011 | 8423  | 753.96  | 0.162122 | 2 K.K+14.016 chr2@1375  | 1.72E-10 | 0.001592 |
| 31Mar2011 | 11531 | 1147.25 | 13.44098 | 3 R.FQSAAG Splice@chr   | 1.64E-15 | 0        |
| 31Mar2011 | 3175  | 583.79  | -23.2497 | 2 R.YLAAAAC chr5@9265   | 3.87E-10 | 0.004798 |
| 31Mar2011 | 3864  | 527.95  | 11.73747 | 3 K.SVVSISSE chr4@1045  | 3.22E-10 | 0.003681 |
| 31Mar2011 | 8960  | 570.87  | 11.95477 | 2 R.KNINVTLI chr1@4939  | 4.42E-10 | 0.00514  |
| 31Mar2011 | 11158 | 491.64  | 23.22207 | 3 R.LLLDKPLF Splice@chr | 1.28E-11 | 0        |
| 31Mar2011 | 7979  | 855.41  | -22.1447 | 2 _HVQEVAI Splice@chr   | 1.60E-10 | 0.0012   |
| 31Mar2011 | 3093  | 422.24  | -14.1272 | 2 R.KVHGFAc chr4@4031   | 4.53E-11 | 2.13E-04 |
| 31Mar2011 | 8384  | 753.96  | 0.162122 | 2 K.K+14.016 chr2@1375  | 8.59E-11 | 8.13E-04 |
| 31Mar2011 | 8832  | 1005.47 | -16.3827 | 2 K.KVELALW Splice@chr  | 1.94E-21 | 0        |
| 31Mar2011 | 10493 | 1003.19 | 17.13413 | 3 R.CWNRRA Splice@chr   | 8.17E-12 | 0        |
| 31Mar2011 | 8505  | 622.33  | 9.587405 | 2 R.AK+14.01 chr2@4270  | 2.93E-10 | 0.003312 |
| 31Mar2011 | 8775  | 695.36  | -28.1907 | 2 H.QHYSLIK Splice@chr  | 1.80E-10 | 0.001592 |
| 31Mar2011 | 2362  | 543.29  | -5.17738 | 2 K.SLHQLLC chr1@1303   | 4.44E-10 | 0.00514  |
| 31Mar2011 | 2881  | 423.26  | 23.30279 | 2 K.LGAETVV chr2@6180   | 5.86E-10 | 0.006762 |
| 31Mar2011 | 10530 | 859.66  | -22.4616 | 4 _ISMTNSN chrX@1761    | 3.15E-10 | 0.003681 |
| 31Mar2011 | 957   | 464.24  | -7.11495 | 2 K.ETSFSTKk chr4@8236  | 6.33E-10 | 0.006925 |
| 31Mar2011 | 2280  | 741.39  | -17.2291 | 2 K.QKSNWH chr5@1229    | 4.04E-11 | 2.13E-04 |
| 31Mar2011 | 2271  | 713.06  | -21.1431 | 3 K.TKIK+14.1 chrX@3026 | 4.97E-10 | 0.005689 |
| 31Mar2011 | 7045  | 748.73  | -12.625  | 3 R.LPSKENL chr4@5639   | 1.99E-10 | 0.00218  |
| 31Mar2011 | 5993  | 586.34  | 11.36604 | 2 R.LVILFFLF chr2@6458  | 5.19E-10 | 0.005867 |
| 31Mar2011 | 8800  | 965.77  | 2.231213 | 4 R.FPHFRAS chr1@4387   | 3.44E-10 | 0.003864 |
| 31Mar2011 | 7978  | 607     | -9.70672 | 3 I.NRFNISLK chrX@1250  | 1.01E-10 | 8.13E-04 |
| 31Mar2011 | 11145 | 491.64  | 23.22207 | 3 R.LLLDKPLF Splice@chr | 3.42E-11 | 2.13E-04 |

|           |       |         |          |                          |          |          |
|-----------|-------|---------|----------|--------------------------|----------|----------|
| 31Mar2011 | 7160  | 1185.93 | -27.6085 | 3 _..NNQMY chr5@1745     | 4.20E-10 | 0.004968 |
| 31Mar2011 | 8015  | 833.93  | -9.2006  | 2 _..IIEPYVAV Splice@chr | 9.39E-11 | 8.13E-04 |
| 31Mar2011 | 6642  | 705.84  | 10.47814 | 2 M.PSMEEV chr5@4890     | 2.72E-15 | 0        |
| 31Mar2011 | 11771 | 565.29  | -27.0912 | 3 _..MTFSDA/ Splice@chr  | 5.98E-11 | 4.20E-04 |
| 31Mar2011 | 10958 | 634.84  | 6.410455 | 2 R.VDIGDILF Splice@chr  | 1.59E-12 | 0        |
| 31Mar2011 | 2922  | 423.26  | 23.30279 | 2 K.LGAETVV chr2@6180    | 5.34E-10 | 0.006043 |
| 31Mar2011 | 7833  | 692.35  | -25.4254 | 2 K.KDKNAAF chr3@8925    | 6.51E-10 | 0.007477 |
| 31Mar2011 | 10978 | 634.84  | 6.410455 | 2 R.VDIGDILF Splice@chr  | 3.33E-13 | 0        |
| 31Mar2011 | 6687  | 705.83  | -3.72364 | 2 M.PSMEEV chr5@4890     | 2.71E-15 | 0        |
| 31Mar2011 | 2965  | 566.81  | 0.647242 | 2 I.RIPLDYAE chr5@2047   | 4.45E-10 | 0.00514  |
| 31Mar2011 | 2393  | 741.39  | -17.2291 | 2 K.QKSNWH chr5@1225     | 2.95E-11 | 2.13E-04 |
| 31Mar2011 | 7003  | 748.73  | -12.625  | 3 R.LPSKENL chr4@5635    | 1.69E-10 | 0.001592 |
| 31Mar2011 | 3450  | 434.24  | 13.9946  | 3 _..RSNDQTI chr5@6378   | 2.97E-10 | 0.003312 |
| 31Mar2011 | 947   | 401.74  | -8.14847 | 2 R.AIGLVSSF chr2@1017   | 1.99E-10 | 0.00218  |
| 31Mar2011 | 8552  | 1153.23 | -17.5731 | 3 F.EGIRTTG Splice@chr   | 6.47E-13 | 0        |
| 31Mar2011 | 2355  | 741.39  | -17.2291 | 2 K.QKSNWH chr5@1225     | 6.87E-11 | 6.25E-04 |
| 31Mar2011 | 8509  | 833.42  | -19.2103 | 2 _..IIEPYVAV Splice@chr | 5.97E-11 | 4.20E-04 |
| 31Mar2011 | 2318  | 741.39  | -17.2291 | 2 K.QKSNWH chr5@1225     | 6.07E-11 | 4.20E-04 |
| 31Mar2011 | 9781  | 765.75  | -8.19391 | 3 R.CLSENILS chr3@5861   | 2.10E-10 | 0.005168 |
| 31Mar2011 | 6632  | 706.34  | 8.098268 | 2 M.PSMEEV chr5@4890     | 2.81E-15 | 0        |
| 31Mar2011 | 11302 | 634.84  | 6.410455 | 2 R.VDIGDILF Splice@chr  | 2.02E-12 | 0        |
| 31Mar2011 | 3649  | 681.35  | -28.0792 | 2 R.RFQERRV chr4@1682    | 8.45E-11 | 0.002702 |
| 31Mar2011 | 917   | 464.24  | -7.11495 | 2 K.ETSFSTK chr4@8236    | 1.52E-10 | 0.004194 |
| 31Mar2011 | 5290  | 509.8   | -23.773  | 2 R.SSVIMLIV chr2@5767   | 5.12E-11 | 0.00221  |
| 31Mar2011 | 11895 | 1116.22 | 16.71106 | 3 K.QAFDDAI Splice@chr   | 2.55E-10 | 0.006916 |
| 31Mar2011 | 12065 | 828.38  | -20.1128 | 2 K.PNLK+14 chr2@3862    | 1.76E-10 | 0.004696 |
| 31Mar2011 | 3938  | 522.31  | -23.2988 | 2 C.PTLLPLPL chr2@1388   | 1.56E-10 | 0.004194 |
| 31Mar2011 | 4462  | 1116.65 | 11.05125 | 1 K.INLKVNSI chr2@7016   | 2.56E-10 | 0.006916 |
| 31Mar2011 | 3583  | 527.95  | 11.73747 | 3 K.SVVSISSE chr4@1045   | 3.07E-10 | 0.008616 |
| 31Mar2011 | 8791  | 1182.57 | -12.6646 | 1 R.RFAENQI chr5@1775    | 1.01E-10 | 0.003184 |
| 31Mar2011 | 8652  | 622.33  | 9.587405 | 2 R.AK+14.01 chr2@4270   | 3.39E-10 | 0.009096 |
| 31Mar2011 | 4178  | 476.73  | -8.21113 | 2 R.SSHEISHF chr5@1494   | 1.99E-10 | 0.005168 |
| 31Mar2011 | 6545  | 705.83  | -3.72364 | 2 M.PSMEEV chr5@4890     | 5.66E-15 | 0        |
| 31Mar2011 | 684   | 452.23  | -1.48793 | 2 R.SGEPLSA/ Splice@chr  | 8.80E-11 | 0.002702 |
| 31Mar2011 | 3828  | 529.6   | -12.9775 | 3 _..AFHESKL chrX@3405   | 7.47E-11 | 0.002702 |
| 31Mar2011 | 945   | 464.24  | -7.11495 | 2 K.ETSFSTK chr4@8236    | 2.88E-10 | 0.0079   |
| 31Mar2011 | 12288 | 809.01  | -7.47824 | 2 R.FTTELLLL chr3@8986   | 5.17E-11 | 0.00221  |
| 31Mar2011 | 5241  | 509.8   | -23.773  | 2 R.SSVIMLIV chr2@5767   | 1.88E-11 | 2.92E-04 |
| 31Mar2011 | 8051  | 607     | -9.70672 | 3 I.NRFNISK chrX@1250    | 1.19E-10 | 0.003184 |
| 31Mar2011 | 5201  | 1017.59 | -22.5744 | 1 R.SSVIMLIV chr2@5767   | 1.88E-11 | 2.92E-04 |
| 31Mar2011 | 5193  | 509.8   | -23.773  | 2 R.SSVIMLIV chr2@5767   | 3.76E-11 | 0.001133 |
| 31Mar2011 | 6585  | 705.83  | -3.72364 | 2 M.PSMEEV chr5@4890     | 4.75E-15 | 0        |
| 31Mar2011 | 11281 | 634.83  | -9.39461 | 2 R.VDIGDILF Splice@chr  | 1.01E-12 | 0        |
| 31Mar2011 | 8932  | 1141.62 | 4.816002 | 1 _..YLFIDITLE chr2@1007 | 1.28E-10 | 0.003446 |
| 31Mar2011 | 5341  | 509.8   | -23.773  | 2 R.SSVIMLIV chr2@5767   | 4.33E-11 | 0.00221  |
| 31Mar2011 | 11499 | 491.64  | 23.22207 | 3 R.LLLDKPLF Splice@chr  | 9.84E-11 | 0.002963 |
| 31Mar2011 | 3797  | 529.6   | -12.9775 | 3 _..AFHESKL chrX@3405   | 3.20E-10 | 0.008867 |

|           |       |         |          |                          |          |          |
|-----------|-------|---------|----------|--------------------------|----------|----------|
| 31Mar2011 | 4224  | 476.73  | -8.21113 | 2 R.SSHEISHF chr5@1494   | 2.34E-10 | 0.00619  |
| 31Mar2011 | 6502  | 599.31  | -27.679  | 3 R.FTELLAC\ chr2@1991   | 1.17E-10 | 0.001864 |
| 31Mar2011 | 1525  | 713.06  | -21.1431 | 3 K.TKIK+14.1 chrX@3026  | 3.99E-10 | 0.006388 |
| 31Mar2011 | 589   | 562.31  | -13.4391 | 2 R.FYLLYLYK Splice@chr  | 4.78E-11 | 4.87E-04 |
| 31Mar2011 | 1588  | 741.39  | -17.2291 | 2 K.QKSNWH chr5@1229     | 3.37E-11 | 2.47E-04 |
| 31Mar2011 | 6821  | 685.88  | 4.188613 | 2 K.IVPGGGA chrX@1570    | 1.29E-11 | 2.47E-04 |
| 31Mar2011 | 5573  | 671.37  | -24.0361 | 2 T.FNIVHTQ Splice@chr   | 5.44E-10 | 0.007602 |
| 31Mar2011 | 3231  | 522.31  | -23.2988 | 2 C.PTLLPPLF chr2@1388   | 6.98E-11 | 9.55E-04 |
| 31Mar2011 | 5538  | 671.37  | -24.0361 | 2 T.FNIVHTQ Splice@chr   | 3.21E-10 | 0.005333 |
| 31Mar2011 | 5804  | 748.73  | -12.625  | 3 R.LPSKENL\ chr4@5639   | 4.69E-10 | 0.006764 |
| 31Mar2011 | 6696  | 607     | -9.70672 | 3 I.NRFNISK chrX@1250    | 1.56E-10 | 0.002753 |
| 31Mar2011 | 6771  | 833.93  | -9.2006  | 2 _..IIEPYVAV Splice@chr | 4.75E-10 | 0.006764 |
| 31Mar2011 | 9976  | 1147.24 | 4.705638 | 3 R.FQSAAIG Splice@chr   | 5.93E-16 | 0        |
| 31Mar2011 | 6737  | 833.93  | -9.2006  | 2 _..IIEPYVAV Splice@chr | 7.01E-10 | 0.009852 |
| 31Mar2011 | 4282  | 616.33  | -16.7632 | 2 K.LSKSVIFQ chr3@2798   | 3.39E-10 | 0.005333 |
| 31Mar2011 | 7224  | 622.33  | 9.587405 | 2 R.AK+14.01 chr2@4270   | 5.00E-10 | 0.006972 |
| 31Mar2011 | 1132  | 551.32  | -5.32365 | 2 K.ESIGERLR chrX@1396   | 3.45E-10 | 0.005537 |
| 31Mar2011 | 6892  | 858.48  | 6.006088 | 3 _..LETGIKPr Splice@chr | 4.05E-11 | 4.87E-04 |
| 31Mar2011 | 4936  | 1075.06 | -6.79295 | 2 R.TCSK+14. chr2@1253   | 1.90E-10 | 0.003418 |
| 31Mar2011 | 5225  | 657.04  | -26.9179 | 3 R.GNVRK+1 chrX@7490    | 4.42E-11 | 4.87E-04 |
| 31Mar2011 | 7262  | 622.33  | 9.587405 | 2 R.AK+14.01 chr2@4270   | 1.54E-10 | 0.002753 |
| 31Mar2011 | 9467  | 634.84  | 6.410455 | 2 R.VDIGDILF Splice@chr  | 1.00E-12 | 0        |
| 31Mar2011 | 9448  | 634.84  | 6.410455 | 2 R.VDIGDILF Splice@chr  | 1.01E-12 | 0        |
| 31Mar2011 | 7576  | 1056.56 | 28.0642  | 3 I.SRVEDDS\ Splice@chr  | 2.86E-15 | 0        |
| 31Mar2011 | 10130 | 1018.55 | -8.33756 | 2 K.LFPWRCI Splice@chr   | 1.97E-10 | 0.003613 |
| 31Mar2011 | 4380  | 509.8   | -23.773  | 2 R.SSVIMLIV chr2@5767   | 5.37E-11 | 7.19E-04 |
| 31Mar2011 | 4341  | 509.8   | -23.773  | 2 R.SSVIMLIV chr2@5767   | 8.91E-11 | 0.001644 |
| 31Mar2011 | 7674  | 785.42  | 22.95449 | 1 _..MPAWAF chr2@1115    | 2.97E-11 | 2.47E-04 |
| 31Mar2011 | 3186  | 522.31  | -23.2988 | 2 C.PTLLPPLF chr2@1388   | 2.67E-10 | 0.004042 |
| 31Mar2011 | 5441  | 705.84  | 10.47814 | 2 M.PSMEEV chr5@4890     | 6.54E-15 | 0        |
| 31Mar2011 | 9962  | 1116.22 | 16.71106 | 3 K.QAFDDAI Splice@chr   | 4.26E-10 | 0.006764 |
| 31Mar2011 | 6027  | 742.38  | -26.3192 | 2 R.ETFISVEK chr5@7449   | 6.98E-10 | 0.009648 |
| 31Mar2011 | 2877  | 758.92  | -4.47097 | 2 C.RGQKEEI chr1@5362    | 2.42E-10 | 0.003819 |
| 31Mar2011 | 6704  | 833.93  | -9.2006  | 2 _..IIEPYVAV Splice@chr | 9.11E-11 | 0.001644 |
| 31Mar2011 | 2726  | 847.44  | -29.1211 | 4 K.MFK+14.1 chrX@2230   | 1.85E-10 | 0.003195 |
| 31Mar2011 | 5404  | 705.84  | 10.47814 | 2 M.PSMEEV chr5@4890     | 1.10E-14 | 0        |
| 31Mar2011 | 3104  | 1025.61 | -11.6755 | 1 K.LGLGSGL chr5@4945    | 4.55E-11 | 5.36E-04 |
| 31Mar2011 | 2442  | 693.87  | -6.6949  | 2 V.ICVAVGD chr5@1063    | 5.83E-11 | 7.87E-04 |
| 31Mar2011 | 7659  | 785.42  | 22.95449 | 1 _..MPAWAF chr2@1115    | 2.17E-11 | 0        |
| 31Mar2011 | 7498  | 965.76  | 6.091444 | 4 R.KTSSCQK chr5@2085    | 3.71E-10 | 0.005599 |
| 31Mar2011 | 4411  | 509.8   | -23.773  | 2 R.SSVIMLIV chr2@5767   | 4.60E-11 | 5.36E-04 |
| 31Mar2011 | 2480  | 693.87  | -6.6949  | 2 V.ICVAVGD chr5@1063    | 6.10E-11 | 7.87E-04 |
| 31Mar2011 | 7513  | 1056.56 | 28.0642  | 3 I.SRVEDDS\ Splice@chr  | 5.96E-14 | 0        |
| 31Mar2011 | 8053  | 1108.92 | -12.2666 | 3 F.PETHVLA chr5@6493    | 1.76E-10 | 0.002514 |
| 31Mar2011 | 3535  | 450.59  | 9.503271 | 3 K.RHRHVDI chr3@2483    | 1.80E-10 | 0.002514 |
| 31Mar2011 | 4373  | 509.8   | -23.773  | 2 R.SSVIMLIV chr2@5767   | 6.69E-11 | 7.87E-04 |
| 31Mar2011 | 2938  | 527.95  | 11.73747 | 3 K.SVVSISSE chr4@1045   | 4.73E-10 | 0.007448 |

|           |       |         |          |                          |          |          |
|-----------|-------|---------|----------|--------------------------|----------|----------|
| 31Mar2011 | 2803  | 696.37  | -15.3603 | 2 _..LPTSPIGD chr5@1204  | 4.70E-10 | 0.007239 |
| 31Mar2011 | 6889  | 685.88  | 4.188613 | 2 K.IVPGGGA chrX@1570    | 1.77E-14 | 0        |
| 31Mar2011 | 411   | 527.27  | -26.7558 | 2 K.VFPFAW\$ chr5@1762   | 7.08E-11 | 7.87E-04 |
| 31Mar2011 | 3053  | 758.92  | -4.47097 | 2 C.RGQKEEI chr1@5362    | 5.04E-11 | 5.36E-04 |
| 31Mar2011 | 7070  | 938.46  | 22.50833 | 2 R.ECSQSDS chr2@8876    | 5.98E-11 | 7.87E-04 |
| 31Mar2011 | 5786  | 748.73  | -12.625  | 3 R.LPSKENL\ chr4@5639   | 1.94E-10 | 0.003477 |
| 31Mar2011 | 3227  | 517.95  | -0.39357 | 3 K.LICMKRSI Splice@chr  | 3.65E-10 | 0.005599 |
| 31Mar2011 | 2374  | 422.24  | -14.1272 | 2 R.KVHGFA\$ chr4@4031   | 1.06E-11 | 0        |
| 31Mar2011 | 4975  | 1075.06 | -6.79295 | 2 R.TCSK+14. chr2@1253   | 8.70E-11 | 0.001305 |
| 31Mar2011 | 10474 | 954.51  | -0.25406 | 1 K.RIGHEWF chr5@7069    | 5.02E-11 | 5.36E-04 |
| 31Mar2011 | 9311  | 634.84  | 6.410455 | 2 R.VDIGDILF Splice@chr  | 6.16E-13 | 0        |
| 31Mar2011 | 6979  | 858.48  | 6.006088 | 3 _..LETGIKPI Splice@chr | 3.29E-11 | 2.76E-04 |
| 31Mar2011 | 5471  | 705.83  | -3.72364 | 2 M.PSMEEV Splice@chr    | 4.03E-14 | 0        |
| 31Mar2011 | 6785  | 607     | -9.70672 | 3 I.NRFNISK chrX@1250    | 1.70E-10 | 0.00227  |
| 31Mar2011 | 5591  | 748.72  | -26.0118 | 3 R.LPSKENL\ chr4@5639   | 3.44E-10 | 0.005599 |
| 31Mar2011 | 784   | 562.31  | -13.4391 | 2 R.FYLLLYLK Splice@chr  | 4.83E-11 | 5.36E-04 |
| 31Mar2011 | 3026  | 677.95  | 22.60469 | 2 R.QLKVIGR chrX@3498    | 2.80E-10 | 0.005174 |
| 31Mar2011 | 5387  | 583.82  | -28.5596 | 2 R.LVPITFS chr1@2422    | 3.81E-10 | 0.005599 |
| 31Mar2011 | 2986  | 677.95  | 22.60469 | 2 R.QLKVIGR chrX@3498    | 2.17E-10 | 0.003477 |
| 31Mar2011 | 6797  | 833.93  | -9.2006  | 2 _..IIEPYVAV Splice@chr | 4.95E-10 | 0.007448 |
| 31Mar2011 | 9204  | 589.79  | -1.03663 | 2 K.KSEIVNY\ chrX@8559   | 5.36E-10 | 0.008633 |
| 31Mar2011 | 7458  | 965.76  | 6.091444 | 4 R.KTSSCQK chr5@2085    | 2.10E-10 | 0.003477 |
| 31Mar2011 | 9484  | 491.64  | 23.22207 | 3 R.LLLDKPLF Splice@chr  | 1.89E-12 | 0        |
| 31Mar2011 | 9824  | 1147.24 | 4.705638 | 3 R.FQSAAIG Splice@chr   | 5.38E-14 | 0        |
| 31Mar2011 | 1598  | 418.89  | -10.5715 | 3 R.ENFATKC chr5@5231    | 6.33E-10 | 0.008393 |
| 31Mar2011 | 10317 | 854.92  | -17.9855 | 2 _..KSFEVAIC Splice@chr | 5.53E-14 | 0        |
| 31Mar2011 | 3081  | 546.78  | -19.0827 | 2 K.ETETGITC chr4@1221   | 5.54E-10 | 0.006909 |
| 31Mar2011 | 7342  | 705.84  | 10.47814 | 2 M.PSMEEV chr5@4890     | 7.82E-15 | 0        |
| 31Mar2011 | 6139  | 829.89  | -16.1259 | 2 R.FEVFEIEC chr4@7299   | 4.39E-10 | 0.005852 |
| 31Mar2011 | 7966  | 554.26  | 6.682444 | 2 R.M+15.99 Splice@chr   | 6.67E-11 | 0.001195 |
| 31Mar2011 | 7960  | 1106.51 | -25.9146 | 1 R.M+15.99 chr5@9235    | 5.95E-10 | 0.007803 |
| 31Mar2011 | 13093 | 491.64  | 23.22207 | 3 R.LLLDKPLF Splice@chr  | 4.34E-10 | 0.005852 |
| 31Mar2011 | 2596  | 437.23  | -20.8939 | 3 I.LVWGGG\$ chrX@2603   | 2.32E-10 | 0.003353 |
| 31Mar2011 | 9015  | 607     | -9.70672 | 3 I.NRFNISK chrX@1250    | 1.70E-10 | 0.002601 |
| 31Mar2011 | 524   | 630.4   | -3.10472 | 1 K.LAVAGAK Splice@chr   | 3.40E-10 | 0.005194 |
| 31Mar2011 | 12891 | 634.84  | 6.410455 | 2 R.VDIGDILF Splice@chr  | 4.18E-13 | 0        |
| 31Mar2011 | 7985  | 833.41  | -5.13266 | 2 _..IDM+15.5 chrX@3237  | 1.74E-10 | 0.002601 |
| 31Mar2011 | 10271 | 1144.59 | 27.90078 | 2 _..YYHFTLDI chr5@8295  | 4.63E-10 | 0.005852 |
| 31Mar2011 | 9759  | 833.42  | -19.2103 | 2 _..IIEPYVAV Splice@chr | 1.00E-10 | 0.002001 |
| 31Mar2011 | 9760  | 622.33  | 9.587405 | 2 R.AK+14.01 chr2@4270   | 2.99E-10 | 0.004592 |
| 31Mar2011 | 1169  | 514.3   | -22.3544 | 2 R.PLESSILLI chr4@4365  | 1.90E-10 | 0.002896 |
| 31Mar2011 | 1685  | 493.61  | 28.00299 | 3 _..FQRHNLN chrX@1408   | 4.07E-10 | 0.005748 |
| 31Mar2011 | 817   | 420.68  | -22.1784 | 2 R.MMTGTC chrX@9534     | 2.40E-12 | 0        |
| 31Mar2011 | 1034  | 562.31  | -13.4391 | 2 R.FYLLLYLK Splice@chr  | 4.93E-11 | 8.66E-04 |
| 31Mar2011 | 2996  | 571.36  | 10.76628 | 2 R.KRKQGAI chr1@1385    | 3.53E-10 | 0.005326 |
| 31Mar2011 | 3536  | 730.33  | -26.2772 | 2 C.RFFSNNP chr5@1970    | 3.58E-10 | 0.005326 |
| 31Mar2011 | 9593  | 753.96  | 0.162122 | 2 K.K+14.016 chr2@1375   | 1.87E-12 | 0        |

|           |       |         |          |                          |          |          |
|-----------|-------|---------|----------|--------------------------|----------|----------|
| 31Mar2011 | 10288 | 785.42  | 22.95449 | 1 _ .MPAWAF chr2@1115    | 4.00E-11 | 8.66E-04 |
| 31Mar2011 | 12064 | 953.26  | 20.59712 | 4 _ .SDNDLFE Splice@chr  | 3.24E-10 | 0.005041 |
| 31Mar2011 | 10919 | 835.45  | -7.2977  | 4 R.K+14.016 chrX@9996   | 2.33E-10 | 0.003353 |
| 31Mar2011 | 1275  | 506.27  | 9.784813 | 2 K.KDYSGGT chrX@1465    | 2.04E-10 | 0.002896 |
| 31Mar2011 | 5904  | 1017.59 | -22.5744 | 1 R.SSVIMLIV chr2@5767   | 1.98E-10 | 0.002896 |
| 31Mar2011 | 9105  | 833.93  | -9.2006  | 2 _ .IIEPYVAV Splice@chr | 1.13E-10 | 0.002156 |
| 31Mar2011 | 7604  | 671.37  | -24.0361 | 2 T.FNIVHTQ Splice@chr   | 5.13E-10 | 0.006001 |
| 31Mar2011 | 9711  | 622.33  | 9.587405 | 2 R.AK+14.01 chr2@4270   | 6.50E-10 | 0.008987 |
| 31Mar2011 | 11355 | 641.36  | 4.696963 | 4 A.EITEMLPi Splice@chr  | 1.90E-11 | 3.60E-04 |
| 31Mar2011 | 10248 | 883.51  | 14.29139 | 2 _ .KIQLLVNI chr2@3282  | 5.99E-10 | 0.007803 |
| 31Mar2011 | 14201 | 809.01  | -7.47824 | 2 R.FTTELLLL chr3@8986   | 9.45E-11 | 0.001845 |
| 31Mar2011 | 12861 | 634.83  | -9.39461 | 2 R.VDIGDILF Splice@chr  | 1.05E-12 | 0        |
| 31Mar2011 | 8013  | 554.26  | 6.682444 | 2 R.M+15.99 Splice@chr   | 1.46E-10 | 0.002445 |
| 31Mar2011 | 5364  | 456.75  | -25.512  | 2 K.ITLEPSPR chr5@5111   | 2.09E-10 | 0.002896 |
| 31Mar2011 | 10102 | 1056.56 | 28.0642  | 3 I.SRVEDDSi Splice@chr  | 5.46E-15 | 0        |
| 31Mar2011 | 13136 | 634.84  | 6.410455 | 2 R.VDIGDILF Splice@chr  | 7.42E-13 | 0        |
| 31Mar2011 | 4031  | 517.96  | 7.005376 | 3 K.NLK+14.0 chr5@1571   | 3.80E-10 | 0.009836 |
| 31Mar2011 | 1051  | 562.31  | -13.4391 | 2 R.FYLLLYLK Splice@chr  | 8.09E-11 | 0.001975 |
| 31Mar2011 | 878   | 452.23  | -1.48793 | 2 R.SGEPLSAi Splice@chr  | 1.41E-10 | 0.003066 |
| 31Mar2011 | 13109 | 634.84  | 6.410455 | 2 R.VDIGDILF Splice@chr  | 4.68E-13 | 0        |
| 31Mar2011 | 8348  | 616.97  | -16.4893 | 3 R.MSQEVA Splice@chr    | 4.04E-11 | 6.21E-04 |
| 31Mar2011 | 5710  | 509.3   | -20.473  | 2 R.SSVIMLIV chr2@5767   | 6.52E-11 | 0.001975 |
| 31Mar2011 | 5665  | 509.8   | -23.773  | 2 R.SSVIMLIV chr2@5767   | 3.76E-11 | 6.21E-04 |
| 31Mar2011 | 9113  | 607     | -9.70672 | 3 I.NRFNISK chrX@1250    | 2.09E-10 | 0.005047 |
| 31Mar2011 | 5762  | 509.3   | -20.473  | 2 R.SSVIMLIV chr2@5767   | 3.76E-11 | 6.21E-04 |
| 31Mar2011 | 8252  | 881.47  | 19.52679 | 2 A.HRK+14.1 chr5@1438   | 2.53E-10 | 0.0054   |
| 31Mar2011 | 3923  | 608.3   | -9.42515 | 4 R.ESFNLY chr3@9522     | 1.00E-10 | 0.002352 |
| 31Mar2011 | 8471  | 578.83  | 0.845038 | 2 R.LSLPQGC Splice@chr   | 1.38E-10 | 0.002888 |
| 31Mar2011 | 5434  | 571.86  | -2.35222 | 2 T.KKGDIVEi chr5@1238   | 3.79E-10 | 0.009836 |
| 31Mar2011 | 795   | 452.23  | -1.48793 | 2 R.SGEPLSAi Splice@chr  | 6.55E-11 | 0.001975 |
| 31Mar2011 | 5204  | 437.46  | 16.92139 | 4 R.RGDVPEI chr3@1335    | 4.86E-12 | 0        |
| 31Mar2011 | 5867  | 509.3   | -20.473  | 2 R.SSVIMLIV chr2@5767   | 1.15E-10 | 0.002514 |
| 31Mar2011 | 12116 | 1028.99 | -16.6017 | 2 R.SQMDILC chrX@1395    | 3.18E-11 | 6.21E-04 |
| 31Mar2011 | 1834  | 626.82  | -18.5922 | 2 W.QFDLGK Splice@chr    | 9.21E-11 | 0.002159 |
| 31Mar2011 | 755   | 420.68  | -22.1784 | 2 R.MMTGTG chrX@9534     | 2.11E-11 | 4.20E-04 |
| 31Mar2011 | 5980  | 509.3   | -20.473  | 2 R.SSVIMLIV chr2@5767   | 4.54E-11 | 8.21E-04 |
| 31Mar2011 | 826   | 452.23  | -1.48793 | 2 R.SGEPLSAi Splice@chr  | 3.55E-11 | 6.21E-04 |
| 31Mar2011 | 1795  | 626.82  | -18.5922 | 2 W.QFDLGK Splice@chr    | 1.41E-10 | 0.003066 |
| 31Mar2011 | 14106 | 860.69  | 14.08015 | 4 R.FQSAAG Splice@chr    | 4.40E-14 | 0        |
| 31Mar2011 | 13951 | 1165.58 | -1.37991 | 3 _ .DNKSWH chrX@1030    | 1.21E-10 | 0.002514 |
| 31Mar2011 | 839   | 452.23  | -1.48793 | 2 R.SGEPLSAi Splice@chr  | 2.82E-11 | 4.20E-04 |
| 31Mar2011 | 7253  | 583.82  | -28.5596 | 2 R.LVFPITFS chr1@2422   | 2.74E-10 | 0.006674 |
| 31Mar2011 | 853   | 452.23  | -1.48793 | 2 R.SGEPLSAi Splice@chr  | 9.37E-11 | 0.002159 |
| 31Mar2011 | 5732  | 1017.59 | -22.5744 | 1 R.SSVIMLIV chr2@5767   | 1.84E-10 | 0.003974 |
| 31Mar2011 | 4341  | 522.31  | -23.2988 | 2 C.PTLLPPLF chr2@1388   | 1.43E-10 | 0.003066 |
| 31Mar2011 | 12061 | 876.39  | -6.29995 | 3 K.GCSSNLE chr2@8466    | 4.80E-11 | 0.001018 |
| 31Mar2011 | 10215 | 1005.47 | -16.3827 | 2 K.KVELALW Splice@chr   | 8.02E-22 | 0        |

|           |       |         |          |                         |          |          |
|-----------|-------|---------|----------|-------------------------|----------|----------|
| 31Mar2011 | 4089  | 529.6   | -12.9775 | 3 _AFHESKL chrX@340     | 3.86E-10 | 0.009836 |
| 31Mar2011 | 14017 | 970.45  | -29.5364 | 3 _VACNKM Splice@chr    | 4.47E-12 | 0        |
| 31Mar2011 | 13387 | 491.64  | 23.22207 | 3 R.LLLDKPLF Splice@chr | 3.30E-11 | 6.21E-04 |
| 31Mar2011 | 9646  | 803.42  | 3.194723 | 2 H.ASSLMII\ Splice@chr | 9.96E-11 | 0.002159 |
| 31Mar2011 | 740   | 420.68  | -22.1784 | 2 R.MMTGTC chrX@953     | 3.49E-12 | 0        |
| 31Mar2011 | 9997  | 1182.57 | -12.6646 | 1 R.RFAENQI chr5@177    | 1.38E-10 | 0.002888 |
| 31Mar2011 | 5816  | 509.3   | -20.473  | 2 R.SSVIMLIV chr2@576   | 6.52E-11 | 0.001975 |
| 31Mar2011 | 10082 | 1182.56 | -21.0399 | 1 R.RFAENQI chr5@177    | 3.04E-10 | 0.00757  |
| 31Mar2011 | 5381  | 571.86  | -2.35222 | 2 T.KKGDIVEI chr5@123   | 3.56E-10 | 0.009689 |
| 31Mar2011 | 7859  | 554.26  | 6.682444 | 2 R.M+15.99 Splice@chr  | 1.11E-10 | 0.002514 |
| 31Mar2011 | 1920  | 713.06  | -21.1431 | 3 K.TKIK+14.I chrX@302  | 7.93E-11 | 8.21E-04 |
| 31Mar2011 | 11218 | 962.8   | 19.96909 | 3 _GCSIVPIS Splice@chr  | 6.77E-11 | 8.21E-04 |
| 31Mar2011 | 3955  | 522.31  | -23.2988 | 2 C.PTLLPPLF chr2@138   | 1.08E-10 | 0.001406 |
| 31Mar2011 | 823   | 562.31  | -13.4391 | 2 R.FYLLYLYK Splice@chr | 4.72E-11 | 6.24E-04 |
| 31Mar2011 | 824   | 464.24  | -7.11495 | 2 K.ETSFSTK chr4@823    | 2.94E-10 | 0.004215 |
| 31Mar2011 | 10693 | 634.84  | 6.410455 | 2 R.VDIGDILF Splice@chr | 1.18E-12 | 0        |
| 31Mar2011 | 5692  | 1075.06 | -6.79295 | 2 R.TCSK+14. chr2@125   | 3.32E-10 | 0.004952 |
| 31Mar2011 | 8096  | 753.96  | 0.162122 | 2 K.K+14.016 chr2@137   | 5.84E-11 | 6.24E-04 |
| 31Mar2011 | 6348  | 671.37  | -24.0361 | 2 T.FNIVHTQ Splice@chr  | 3.66E-10 | 0.005497 |
| 31Mar2011 | 9587  | 1143.87 | 4.220916 | 3 K.NMITGTS Splice@chr  | 1.17E-10 | 0.001406 |
| 31Mar2011 | 6386  | 707.41  | -23.3865 | 2 K.FHK+14.C Splice@chr | 5.42E-10 | 0.008188 |
| 31Mar2011 | 3688  | 1025.61 | -11.6755 | 1 K.LGLGSGL chr5@494    | 5.31E-12 | 0        |
| 31Mar2011 | 1820  | 423.21  | -13.0106 | 2 K.YLFSGMK chr5@826    | 4.16E-10 | 0.006405 |
| 31Mar2011 | 860   | 562.31  | -13.4391 | 2 R.FYLLYLYK Splice@chr | 5.02E-11 | 6.24E-04 |
| 31Mar2011 | 10144 | 1003.19 | 17.13413 | 3 R.CWNRRA Splice@chr   | 4.43E-12 | 0        |
| 31Mar2011 | 1952  | 741.39  | -17.2291 | 2 K.QKSNWH chr5@122     | 6.96E-11 | 8.21E-04 |
| 31Mar2011 | 6389  | 671.37  | -24.0361 | 2 T.FNIVHTQ Splice@chr  | 3.23E-10 | 0.004772 |
| 31Mar2011 | 8652  | 785.42  | 22.95449 | 1 _MPAWAF chr2@111      | 2.29E-11 | 4.36E-04 |
| 31Mar2011 | 10667 | 634.84  | 6.410455 | 2 R.VDIGDILF Splice@chr | 1.59E-11 | 4.36E-04 |
| 31Mar2011 | 10875 | 491.64  | 23.22207 | 3 R.LLLDKPLF Splice@chr | 5.25E-11 | 6.24E-04 |
| 31Mar2011 | 6284  | 705.84  | 10.47814 | 2 M.PSMEEV Splice@chr   | 4.11E-13 | 0        |
| 31Mar2011 | 6001  | 572.3   | -7.79904 | 2 _LTVDVSA chr3@101     | 3.80E-10 | 0.006057 |
| 31Mar2011 | 2914  | 693.87  | -6.6949  | 2 V.ICVAVGD chr5@106    | 3.40E-11 | 6.24E-04 |
| 31Mar2011 | 2217  | 936.48  | 27.86052 | 1 K.LNGGYEC chr2@119    | 1.75E-11 | 4.36E-04 |
| 31Mar2011 | 1997  | 543.28  | -23.5233 | 2 K.SLHQLLC chr1@130    | 1.46E-10 | 0.001983 |
| 31Mar2011 | 7704  | 833.93  | -9.2006  | 2 _IIEPYVAM Splice@chr  | 4.26E-11 | 6.24E-04 |
| 31Mar2011 | 6759  | 554.26  | 6.682444 | 2 R.M+15.99 Splice@chr  | 5.54E-10 | 0.00835  |
| 31Mar2011 | 625   | 420.68  | -22.1784 | 2 R.MMTGTC chrX@953     | 4.23E-12 | 0        |
| 31Mar2011 | 6966  | 616.64  | -9.1871  | 3 R.MSQEVA Splice@chr   | 3.16E-10 | 0.004588 |
| 31Mar2011 | 5577  | 586.34  | 11.36604 | 2 R.LVILFFLF chr2@645   | 5.61E-10 | 0.00835  |
| 31Mar2011 | 7808  | 858.48  | 6.006088 | 3 _LETGIKPI Splice@chr  | 8.83E-14 | 0        |
| 31Mar2011 | 3558  | 677.95  | 22.60469 | 2 R.QLKVIGR chrX@349    | 1.79E-11 | 4.36E-04 |
| 31Mar2011 | 7629  | 607     | -9.70672 | 3 I.NRFNISK chrX@125    | 1.41E-10 | 0.001793 |
| 31Mar2011 | 2872  | 693.87  | -6.6949  | 2 V.ICVAVGD chr5@106    | 6.52E-10 | 0.009582 |
| 31Mar2011 | 6432  | 792.9   | -12.2226 | 2 K.SKWDQA chr4@419     | 2.79E-10 | 0.004215 |
| 31Mar2011 | 5175  | 830.39  | -18.1496 | 2 R.FEVFEIEC chr4@729   | 4.25E-10 | 0.006405 |
| 31Mar2011 | 8260  | 514.52  | 26.86268 | 4 K.LSCFKHG chrX@146    | 5.69E-10 | 0.008689 |

|           |       |         |          |                         |          |          |
|-----------|-------|---------|----------|-------------------------|----------|----------|
| 31Mar2011 | 10862 | 491.64  | 23.22207 | 3 R.LLLDKPLF Splice@chr | 4.89E-10 | 0.007485 |
| 31Mar2011 | 11272 | 1116.22 | 16.71106 | 3 K.QAFDDAI Splice@chr  | 2.10E-10 | 0.003324 |
| 31Mar2011 | 5071  | 582.35  | -7.8392  | 3 K.LERNSLKI chr1@1139  | 1.21E-11 | 2.27E-04 |
| 31Mar2011 | 12680 | 962.8   | 19.96909 | 3 _GCSIVPIS Splice@chr  | 4.43E-11 | 6.00E-04 |
| 31Mar2011 | 3976  | 677.95  | 22.60469 | 2 R.QLKVIGR chrX@3498   | 3.15E-10 | 0.004863 |
| 31Mar2011 | 3513  | 434.24  | 13.9946  | 3 _RSNDQTI chr5@6378    | 1.67E-10 | 0.002796 |
| 31Mar2011 | 12274 | 491.64  | 23.22207 | 3 R.LLLDKPLF Splice@chr | 1.79E-10 | 0.003142 |
| 31Mar2011 | 3819  | 474.78  | -7.40756 | 2 R.IYIPAMLk chr2@2768  | 6.82E-11 | 0.001369 |
| 31Mar2011 | 12257 | 491.64  | 23.22207 | 3 R.LLLDKPLF chr3@1367  | 3.92E-12 | 4.40E-04 |
| 31Mar2011 | 12757 | 1147.25 | 13.44098 | 3 R.FQSAAIG Splice@chr  | 1.85E-14 | 0        |
| 31Mar2011 | 951   | 562.31  | -13.4391 | 2 R.FYLLLYLK Splice@chr | 5.67E-11 | 0.001175 |
| 31Mar2011 | 6255  | 586.34  | 11.36604 | 2 R.LVILFFLF chr2@6458  | 4.57E-10 | 0.007967 |
| 31Mar2011 | 4019  | 677.95  | 22.60469 | 2 R.QLKVIGR chrX@3498   | 4.14E-10 | 0.007294 |
| 31Mar2011 | 9778  | 477.74  | 8.001825 | 2 K.FTATGTG chr3@5103   | 2.93E-10 | 0.004863 |
| 31Mar2011 | 12731 | 1116.22 | 16.71106 | 3 K.QAFDDAI Splice@chr  | 2.66E-10 | 0.004863 |
| 31Mar2011 | 8663  | 833.93  | -9.2006  | 2 _IIEPYVAV Splice@chr  | 1.77E-10 | 0.003142 |
| 31Mar2011 | 2323  | 419.72  | 21.74864 | 2 _SYPGGAA chr5@1526    | 6.71E-12 | 4.40E-04 |
| 31Mar2011 | 9088  | 753.95  | -13.1319 | 2 K.K+14.016 chr2@1375  | 2.67E-11 | 6.00E-04 |
| 31Mar2011 | 7539  | 554.26  | 6.682444 | 2 R.M+15.99 Splice@chr  | 8.96E-11 | 0.001737 |
| 31Mar2011 | 3587  | 493.78  | -11.3951 | 2 R.KNQENLL Splice@chr  | 3.60E-10 | 0.005735 |
| 31Mar2011 | 710   | 420.68  | -22.1784 | 2 R.MMTGTG chrX@9534    | 2.26E-11 | 6.00E-04 |
| 31Mar2011 | 8977  | 833.42  | -19.2103 | 2 _IIEPYVAV Splice@chr  | 2.36E-10 | 0.004032 |
| 31Mar2011 | 8954  | 653.89  | -9.62894 | 2 K.QINLKLQ chr2@1024   | 5.44E-11 | 0.001175 |
| 31Mar2011 | 930   | 464.24  | -7.11495 | 2 K.ETSFSTKk chr4@8236  | 4.08E-10 | 0.007128 |
| 31Mar2011 | 6948  | 479.92  | 1.35942  | 3 R.IAKM+15 chr2@4765   | 2.64E-10 | 0.004373 |
| 31Mar2011 | 12067 | 634.84  | 6.410455 | 2 R.VDIGDILF Splice@chr | 3.74E-13 | 0        |
| 31Mar2011 | 12669 | 962.8   | 19.96909 | 3 _GCSIVPIS Splice@chr  | 1.93E-10 | 0.003142 |
| 31Mar2011 | 11476 | 1003.19 | 17.13413 | 3 R.CWNRRA Splice@chr   | 1.33E-11 | 6.00E-04 |
| 31Mar2011 | 11455 | 1003.19 | 17.13413 | 3 R.CWNRRA Splice@chr   | 8.16E-12 | 4.40E-04 |
| 31Mar2011 | 8246  | 671.37  | -24.0361 | 2 T.FNIVHTQ Splice@chr  | 2.15E-10 | 0.003499 |
| 31Mar2011 | 2817  | 571.36  | 10.76628 | 2 R.KRKQGAi chr1@1385   | 5.40E-11 | 0.001175 |
| 31Mar2011 | 4535  | 450.59  | 9.503271 | 3 K.RHRHVDI chr3@2483   | 4.85E-10 | 0.008821 |
| 31Mar2011 | 10355 | 722.45  | -4.95112 | 2 R.RK+14.01 Splice@chr | 5.06E-10 | 0.009331 |
| 31Mar2011 | 2869  | 546.78  | -19.0827 | 2 K.ETETGITC chr4@1221  | 2.34E-10 | 0.004032 |
| 31Mar2011 | 12034 | 634.84  | 6.410455 | 2 R.VDIGDILF Splice@chr | 2.39E-13 | 0        |
| 31Mar2011 | 8815  | 858.48  | 6.006088 | 3 _LETGIKPI Splice@chr  | 2.50E-12 | 2.43E-04 |
| 31Mar2011 | 2905  | 423.26  | 23.30279 | 2 K.LGAETVV chr2@6180   | 5.27E-10 | 0.009492 |
| 31Mar2011 | 5463  | 830.39  | -18.1496 | 2 R.FEVFEIEC chr4@7299  | 4.52E-10 | 0.008118 |
| 31Mar2011 | 10173 | 868.47  | -17.3524 | 2 L.FLWSK+1 chr2@1462   | 4.98E-10 | 0.008978 |
| 31Mar2011 | 8220  | 858.48  | 6.006088 | 3 _LETGIKPI Splice@chr  | 2.30E-12 | 2.52E-04 |
| 31Mar2011 | 1164  | 510.3   | 12.8833  | 2 R.RHVAYVF chr1@1479   | 7.05E-11 | 0.001008 |
| 31Mar2011 | 9544  | 722.45  | -4.95112 | 2 R.RK+14.01 Splice@chr | 5.28E-10 | 0.009156 |
| 31Mar2011 | 6446  | 705.84  | 10.47814 | 2 M.PSMEEV chr5@4890    | 1.01E-14 | 0        |
| 31Mar2011 | 8845  | 1056.56 | 28.0642  | 3 I.SRVEDDS Splice@chr  | 3.92E-13 | 0        |
| 31Mar2011 | 8415  | 753.96  | 0.162122 | 2 K.K+14.016 chr2@1375  | 4.60E-10 | 0.008652 |
| 31Mar2011 | 8535  | 622.33  | 9.587405 | 2 R.AK+14.01 chr2@4270  | 2.80E-10 | 0.004886 |
| 31Mar2011 | 12131 | 809.01  | -7.47824 | 2 R.FTTELLLL chr3@8986  | 3.52E-11 | 6.35E-04 |

|           |       |         |          |                          |          |          |
|-----------|-------|---------|----------|--------------------------|----------|----------|
| 31Mar2011 | 1131  | 510.3   | 12.8833  | 2 R.RHVAYVF chr1@1479    | 1.31E-11 | 4.41E-04 |
| 31Mar2011 | 7999  | 833.93  | -9.2006  | 2 _..IIEPYVAV Splice@chr | 4.30E-11 | 0.001008 |
| 31Mar2011 | 970   | 452.26  | -4.66636 | 2 R.VLHNAPF chr2@1406    | 2.84E-10 | 0.004886 |
| 31Mar2011 | 6483  | 705.84  | 10.47814 | 2 M.PSMEEV chr5@4890     | 2.55E-15 | 0        |
| 31Mar2011 | 2059  | 741.38  | -23.1647 | 2 K.FPENRHI chr2@1477    | 1.92E-10 | 0.002703 |
| 31Mar2011 | 5909  | 1075.05 | -16.1169 | 2 R.TCSK+14. chr2@1253   | 2.78E-10 | 0.004886 |
| 31Mar2011 | 4549  | 1116.66 | 20.02355 | 1 K.INLKVNSI chr2@7016   | 3.06E-10 | 0.004886 |
| 31Mar2011 | 2245  | 460.25  | -0.06645 | 2 K.IAECSVLK chrX@2064   | 2.75E-10 | 0.004886 |
| 31Mar2011 | 9050  | 785.42  | 22.95449 | 1 _..MPAWAF chr2@1115    | 2.17E-11 | 6.35E-04 |
| 31Mar2011 | 899   | 562.31  | -13.4391 | 2 R.FYLLYLYK Splice@chr  | 5.17E-11 | 0.001008 |
| 31Mar2011 | 2557  | 430.98  | 28.39109 | 4 K.YVITNGIN chr4@8395   | 1.60E-10 | 0.00252  |
| 31Mar2011 | 4131  | 525.78  | -16.6318 | 2 K.LSDYRLQ chr1@1279    | 4.44E-10 | 0.007941 |
| 31Mar2011 | 6531  | 705.84  | 10.47814 | 2 M.PSMEEV chr5@4890     | 3.04E-14 | 0        |
| 31Mar2011 | 3824  | 1025.61 | -11.6755 | 1 K.LGLGSGL chr5@4945    | 7.24E-12 | 4.41E-04 |
| 31Mar2011 | 8582  | 833.42  | -19.2103 | 2 _..IIEPYVAV Splice@chr | 4.22E-10 | 0.007228 |
| 31Mar2011 | 7935  | 607     | -9.70672 | 3 I.NRFNISK chrX@1250    | 7.17E-11 | 0.001008 |
| 31Mar2011 | 7956  | 833.93  | -9.2006  | 2 _..IIEPYVAV Splice@chr | 5.34E-10 | 0.00933  |
| 31Mar2011 | 2334  | 936.48  | 27.86052 | 1 K.LNGGYEC chr2@1191    | 5.98E-11 | 0.001008 |
| 31Mar2011 | 3192  | 434.24  | 13.9946  | 3 _..RSNDQTI chr5@6378   | 1.76E-10 | 0.00252  |
| 31Mar2011 | 8175  | 858.48  | 6.006088 | 3 _..LETGIKPI Splice@chr | 7.84E-13 | 0        |
| 31Mar2011 | 11107 | 634.84  | 6.410455 | 2 R.VDIGDILF Splice@chr  | 1.96E-12 | 0        |
| 31Mar2011 | 1988  | 713.06  | -21.1431 | 3 K.TKIK+14.1 chrX@3026  | 4.58E-10 | 0.008652 |
| 31Mar2011 | 3239  | 434.24  | 13.9946  | 3 _..RSNDQTI chr5@6378   | 8.96E-11 | 0.001203 |
| 31Mar2011 | 1477  | 594.8   | -20.0434 | 2 R.KMGIEAC chr2@1114    | 2.57E-10 | 0.003998 |
| 31Mar2011 | 11141 | 634.84  | 6.410455 | 2 R.VDIGDILF Splice@chr  | 9.53E-13 | 0        |
| 31Mar2011 | 12361 | 910.51  | -22.3017 | 1 R.VRLGDPF chr2@6150    | 4.78E-10 | 0.008825 |
| 31Mar2011 | 4720  | 596.32  | 13.94377 | 2 K.M+15.99 chr2@1468    | 1.33E-10 | 0.002151 |
| 31Mar2011 | 1172  | 409.23  | -22.327  | 3 R.LSHALSG chr1@5436    | 5.42E-10 | 0.007664 |
| 31Mar2011 | 7693  | 622.33  | 9.587405 | 2 R.AK+14.01 chr2@4270   | 1.76E-10 | 0.002456 |
| 31Mar2011 | 4843  | 897.42  | -27.6753 | 3 _..QVREMH Splice@chr   | 4.14E-10 | 0.00627  |
| 31Mar2011 | 7056  | 855.91  | -24.1079 | 2 _..HVQEVAI Splice@chr  | 2.30E-14 | 0        |
| 31Mar2011 | 11254 | 1105.21 | -11.0549 | 3 K.LAFDDAI Splice@chr   | 1.30E-11 | 0        |
| 31Mar2011 | 7076  | 607     | -9.70672 | 3 I.NRFNISK chrX@1250    | 6.12E-11 | 9.54E-04 |
| 31Mar2011 | 1797  | 936.48  | 27.86052 | 1 K.LNGGYEC chr2@1191    | 2.31E-10 | 0.002661 |
| 31Mar2011 | 11077 | 782.59  | -22.9272 | 5 K.KFTQIQN chr3@7095    | 5.75E-10 | 0.008082 |
| 31Mar2011 | 7345  | 858.48  | 6.006088 | 3 _..LETGIKPI Splice@chr | 1.30E-12 | 0        |
| 31Mar2011 | 5079  | 1075.06 | -6.79295 | 2 R.TCSK+14. chr2@1253   | 2.71E-10 | 0.00396  |
| 31Mar2011 | 7480  | 803.43  | 10.08618 | 2 R.FGFEEGS chr3@6206    | 3.20E-10 | 0.005028 |
| 31Mar2011 | 9364  | 1067.09 | 27.52422 | 2 K.QK+14.01 chr1@4913   | 3.52E-10 | 0.005229 |
| 31Mar2011 | 4383  | 771.39  | 2.218364 | 2 R.NFFKTPA chr3@1244    | 3.54E-10 | 0.005444 |
| 31Mar2011 | 11351 | 960.55  | 3.504387 | 1 R.GVRRCRF chr4@3035    | 6.16E-10 | 0.009496 |
| 31Mar2011 | 10817 | 1116.22 | 16.71106 | 3 K.QAFDDAI Splice@chr   | 8.00E-11 | 0.00164  |
| 31Mar2011 | 6736  | 454.25  | -15.7105 | 3 R.VLIRINGM Splice@chr  | 2.24E-10 | 0.002661 |
| 31Mar2011 | 6591  | 671.37  | -24.0361 | 2 T.FNIVHTQ Splice@chr   | 1.83E-10 | 0.002456 |
| 31Mar2011 | 7463  | 664.7   | 1.197202 | 3 _..PTLNK+1. chr1@6526  | 1.01E-10 | 0.002064 |
| 31Mar2011 | 10855 | 1147.25 | 13.44098 | 3 R.FQSAAG Splice@chr    | 8.18E-14 | 0        |
| 31Mar2011 | 9790  | 1011.17 | 5.478214 | 3 R.CWNRRA Splice@chr    | 4.72E-10 | 0.00665  |

|           |       |         |          |                         |          |          |
|-----------|-------|---------|----------|-------------------------|----------|----------|
| 31Mar2011 | 7421  | 664.7   | 1.197202 | 3 _PTLNK+1 chr1@6526    | 1.25E-11 | 0        |
| 31Mar2011 | 3447  | 450.59  | 14.30023 | 3 R.ISSLSVVE chrX@1634  | 5.00E-10 | 0.006849 |
| 31Mar2011 | 7587  | 628.81  | 7.77769  | 2 R.REESSFQ Splice@chr  | 5.55E-10 | 0.007664 |
| 31Mar2011 | 4617  | 440.24  | 24.04044 | 2 R.YNRAPM chr5@4305    | 2.04E-10 | 0.002456 |
| 31Mar2011 | 7708  | 833.42  | -19.2103 | 2 _IIEPYVAV Splice@chr  | 3.50E-11 | 7.22E-04 |
| 31Mar2011 | 9085  | 735.62  | -10.6169 | 4 S.ILQLPEIS/ chr4@1391 | 5.67E-10 | 0.007664 |
| 31Mar2011 | 11227 | 675.35  | -28.6783 | 4 K.SEITEIHK+ chrX@9195 | 2.95E-10 | 0.004169 |
| 31Mar2011 | 5908  | 671.37  | -24.0361 | 2 T.FNIVHTQ Splice@chr  | 4.79E-10 | 0.00665  |
| 31Mar2011 | 8052  | 1056.56 | 28.0642  | 3 I.SRVEDDS( Splice@chr | 9.33E-14 | 0        |
| 31Mar2011 | 2596  | 434.24  | 13.9946  | 3 _RSNDQTI chr5@6378    | 1.50E-10 | 0.002274 |
| 31Mar2011 | 3973  | 400.75  | 5.038673 | 2 K.VEAAVAI Splice@chr  | 2.00E-10 | 0.002456 |
| 31Mar2011 | 8201  | 785.42  | 22.95449 | 1 _MPAWAF chr2@1115     | 8.49E-11 | 0.001861 |
| 31Mar2011 | 2556  | 434.24  | 13.9946  | 3 _RSNDQTI chr5@6378    | 7.83E-11 | 0.00164  |
| 31Mar2011 | 7160  | 833.93  | -9.2006  | 2 _IIEPYVAV Splice@chr  | 1.30E-10 | 0.002064 |
| 31Mar2011 | 2481  | 434.24  | 13.9946  | 3 _RSNDQTI chr5@6378    | 2.32E-10 | 0.002661 |
| 31Mar2011 | 3292  | 525.78  | -16.6318 | 2 K.LSDYRLQ chr1@1275   | 4.51E-10 | 0.00665  |
| 31Mar2011 | 3412  | 517.96  | 7.005376 | 3 K.NLK+14.C chr5@1571  | 2.01E-10 | 0.002456 |
| 31Mar2011 | 10250 | 634.84  | 6.410455 | 2 R.VDIGDILF Splice@chr | 8.06E-13 | 0        |
| 31Mar2011 | 5129  | 1075.06 | -6.79295 | 2 R.TCSK+14. chr2@1255  | 3.27E-10 | 0.005229 |
| 31Mar2011 | 10273 | 634.84  | 6.410455 | 2 R.VDIGDILF Splice@chr | 1.40E-12 | 0        |
| 31Mar2011 | 3369  | 517.96  | 7.005376 | 3 K.NLK+14.C chr5@1571  | 4.17E-10 | 0.00627  |
| 31Mar2011 | 10847 | 860.69  | 14.08015 | 4 R.FQSAAIG Splice@chr  | 3.03E-13 | 0        |
| 31Mar2011 | 8052  | 580.66  | 8.535221 | 3 M.MIRSEM Splice@chr   | 1.71E-10 | 0.003883 |
| 31Mar2011 | 4433  | 927.5   | 17.85317 | 1 R.NMIVHG chr1@7221    | 3.05E-10 | 0.005598 |
| 31Mar2011 | 3899  | 1025.61 | -11.6755 | 1 K.LGLGSGL chr5@4945   | 3.76E-11 | 4.99E-04 |
| 31Mar2011 | 604   | 420.68  | -22.1784 | 2 R.MMTGT( chrX@9534    | 2.81E-12 | 0        |
| 31Mar2011 | 12566 | 1105.21 | -11.0549 | 3 K.LAFDDAI/ Splice@chr | 6.24E-12 | 0        |
| 31Mar2011 | 9047  | 1182.56 | -21.0399 | 1 R.RFAENQI chr5@1775   | 7.11E-11 | 0.001203 |
| 31Mar2011 | 8090  | 887.93  | 29.43791 | 2 I.DEREESTA Splice@chr | 2.56E-10 | 0.004503 |
| 31Mar2011 | 4612  | 821.98  | -9.59041 | 2 K.KVLLVST( chr1@1115  | 3.38E-10 | 0.006007 |
| 31Mar2011 | 5530  | 509.3   | -20.473  | 2 R.SSVIMLIV chr2@5767  | 6.62E-11 | 9.73E-04 |
| 31Mar2011 | 5443  | 509.3   | -20.473  | 2 R.SSVIMLIV chr2@5767  | 6.22E-11 | 9.73E-04 |
| 31Mar2011 | 1739  | 626.82  | -18.5922 | 2 W.QFDLGK Splice@chr   | 3.70E-10 | 0.007298 |
| 31Mar2011 | 2416  | 936.48  | 27.86052 | 1 K.LNGGYEC chr2@1191   | 4.59E-11 | 7.36E-04 |
| 31Mar2011 | 7127  | 748.73  | -12.625  | 3 R.LPSKENL\ chr4@5635  | 3.17E-11 | 4.99E-04 |
| 31Mar2011 | 7259  | 1111.1  | -11.1063 | 2 R.LLM+15.5 chr4@3284  | 6.51E-11 | 9.73E-04 |
| 31Mar2011 | 2478  | 979.49  | 11.24178 | 1 _NLQNGN chr2@1080     | 2.65E-10 | 0.004503 |
| 31Mar2011 | 2380  | 936.48  | 27.86052 | 1 K.LNGGYEC chr2@1191   | 1.78E-11 | 2.59E-04 |
| 31Mar2011 | 5487  | 509.3   | -20.473  | 2 R.SSVIMLIV chr2@5767  | 1.28E-10 | 0.002103 |
| 31Mar2011 | 7000  | 671.37  | -24.0361 | 2 T.FNIVHTQ Splice@chr  | 9.84E-11 | 0.001663 |
| 31Mar2011 | 10272 | 641.36  | 4.696963 | 4 A.EITEMLPi Splice@chr | 7.67E-12 | 0        |
| 31Mar2011 | 5417  | 1017.59 | -22.5744 | 1 R.SSVIMLIV chr2@5767  | 4.22E-10 | 0.009245 |
| 31Mar2011 | 11585 | 909.21  | -12.9565 | 4 R.RTSDSMI chr4@6771   | 9.04E-11 | 0.001663 |
| 31Mar2011 | 1500  | 418.89  | -10.5715 | 3 R.ENFATKC chr5@5231   | 3.96E-10 | 0.0086   |
| 31Mar2011 | 9228  | 1056.56 | 28.0642  | 3 I.SRVEDDS( Splice@chr | 1.78E-14 | 0        |
| 31Mar2011 | 9194  | 1056.56 | 28.0642  | 3 I.SRVEDDS( Splice@chr | 1.03E-14 | 0        |
| 31Mar2011 | 5577  | 509.3   | -20.473  | 2 R.SSVIMLIV chr2@5767  | 3.76E-11 | 4.99E-04 |

|           |       |         |          |                          |          |          |
|-----------|-------|---------|----------|--------------------------|----------|----------|
| 31Mar2011 | 8525  | 858.48  | 6.006088 | 3 _..LETGIKPI Splice@chr | 3.90E-12 | 0        |
| 31Mar2011 | 11541 | 634.84  | 6.410455 | 2 R.VDIGDILF Splice@chr  | 1.53E-12 | 0        |
| 31Mar2011 | 6284  | 1075.05 | -16.1169 | 2 R.TCSK+14. chr2@125    | 2.84E-10 | 0.004718 |
| 31Mar2011 | 3365  | 584.69  | -9.76929 | 5 _..TVFYGDL chr4@556    | 2.14E-10 | 0.004321 |
| 31Mar2011 | 5403  | 509.8   | -23.773  | 2 R.SSVIMLIV chr2@576    | 2.19E-10 | 0.004321 |
| 31Mar2011 | 9483  | 996.49  | -22.685  | 2 K.SHCRSRF chr5@450     | 3.23E-10 | 0.006007 |
| 31Mar2011 | 7303  | 748.73  | -12.625  | 3 R.LPSKENL chr4@563     | 1.88E-10 | 0.003883 |
| 31Mar2011 | 8365  | 833.93  | -9.2006  | 2 _..IIEPYVAM Splice@chr | 2.14E-10 | 0.004321 |
| 31Mar2011 | 11709 | 792.15  | -18.5783 | 4 K.SGTIFDNI Splice@chr  | 4.08E-17 | 0        |
| 31Mar2011 | 579   | 420.68  | -22.1784 | 2 R.MMTGTG chrX@953      | 3.85E-12 | 0        |
| 31Mar2011 | 12265 | 1147.24 | 4.705638 | 3 R.FQSAAIG Splice@chr   | 1.39E-16 | 0        |
| 31Mar2011 | 12004 | 606.63  | -14.6199 | 3 K.KCNEEGC chr3@117     | 7.15E-11 | 0.001203 |
| 31Mar2011 | 8166  | 484.61  | 1.222351 | 3 K.ISSAIAMf chr4@754    | 3.70E-11 | 4.99E-04 |
| 31Mar2011 | 623   | 420.68  | -22.1784 | 2 R.MMTGTG chrX@953      | 2.32E-11 | 2.59E-04 |
| 31Mar2011 | 5549  | 1017.59 | -22.5744 | 1 R.SSVIMLIV chr2@576    | 2.44E-10 | 0.004503 |
| 31Mar2011 | 3109  | 693.87  | -6.6949  | 2 V.ICVAVGD chr5@106     | 2.82E-10 | 0.004718 |
| 31Mar2011 | 8328  | 833.93  | -9.2006  | 2 _..IIEPYVAM Splice@chr | 7.41E-11 | 0.001203 |
| 31Mar2011 | 4453  | 476.73  | -8.21113 | 2 R.SSHEISHF chr5@149    | 4.45E-11 | 7.36E-04 |
| 31Mar2011 | 6959  | 671.37  | -24.0361 | 2 T.FNIVHTQ Splice@chr   | 3.06E-10 | 0.005598 |
| 31Mar2011 | 7230  | 833.41  | -5.13266 | 2 _..IDM+15. chrX@323    | 2.92E-10 | 0.005155 |
| 31Mar2011 | 3058  | 693.87  | -6.6949  | 2 V.ICVAVGD chr5@106     | 4.27E-10 | 0.009681 |
| 31Mar2011 | 7132  | 580.66  | 8.535221 | 3 M.MIRSEM Splice@chr    | 5.01E-10 | 0.007537 |
| 31Mar2011 | 2841  | 693.87  | -6.6949  | 2 V.ICVAVGD chr5@106     | 6.72E-10 | 0.009342 |
| 31Mar2011 | 8004  | 833.42  | -19.2103 | 2 _..IIEPYVAM Splice@chr | 2.02E-11 | 5.19E-04 |
| 31Mar2011 | 7239  | 887.93  | 29.43791 | 2 I.DEREESTM Splice@chr  | 5.58E-10 | 0.007916 |
| 31Mar2011 | 682   | 420.68  | -22.1784 | 2 R.MMTGTG chrX@953      | 5.44E-12 | 0        |
| 31Mar2011 | 10328 | 491.64  | 23.22207 | 3 R.LLLDKPLF Splice@chr  | 2.87E-11 | 0.001208 |
| 31Mar2011 | 10320 | 792.15  | -18.5783 | 4 K.SGTIFDNI Splice@chr  | 1.40E-17 | 0        |
| 31Mar2011 | 2291  | 432.75  | 10.60282 | 2 R.VYQVLDK chr1@913     | 4.71E-10 | 0.006919 |
| 31Mar2011 | 7429  | 833.93  | -9.2006  | 2 _..IIEPYVAM Splice@chr | 6.42E-11 | 0.001208 |
| 31Mar2011 | 6343  | 1111.11 | -2.0893  | 2 R.LLM+15. chr4@328     | 2.06E-11 | 5.19E-04 |
| 31Mar2011 | 882   | 562.31  | -13.4391 | 2 R.FYLLLYLK Splice@chr  | 4.95E-11 | 0.001208 |
| 31Mar2011 | 8301  | 1056.56 | 28.0642  | 3 I.SRVEDDS Splice@chr   | 2.59E-13 | 0        |
| 31Mar2011 | 9164  | 742.88  | -6.21424 | 2 K.M+15.99 chr4@164     | 5.73E-10 | 0.00812  |
| 31Mar2011 | 9815  | 1007.86 | 15.19559 | 3 R.CWNRRA Splice@chr    | 2.63E-10 | 0.003801 |
| 31Mar2011 | 11138 | 1105.21 | -11.0549 | 3 K.LAFDDAI Splice@chr   | 2.42E-10 | 0.003587 |
| 31Mar2011 | 6018  | 558.3   | -13.2154 | 3 R.KFWNVP chrX@147      | 9.97E-11 | 0.002092 |
| 31Mar2011 | 6221  | 671.37  | -24.0361 | 2 T.FNIVHTQ Splice@chr   | 6.65E-10 | 0.009342 |
| 31Mar2011 | 2213  | 936.48  | 27.86052 | 1 K.LNGGYEC chr2@119     | 1.13E-10 | 0.002092 |
| 31Mar2011 | 3087  | 493.78  | -11.3951 | 2 R.KNQENLI Splice@chr   | 4.67E-10 | 0.00671  |
| 31Mar2011 | 3086  | 578.29  | -13.7017 | 2 R.LLFFGATI Splice@chr  | 1.03E-10 | 0.002092 |
| 31Mar2011 | 9926  | 1007.86 | 15.19559 | 3 R.CWNRRA Splice@chr    | 2.84E-10 | 0.004227 |
| 31Mar2011 | 3429  | 517.96  | 7.005376 | 3 K.NLK+14.C chr5@157    | 6.66E-10 | 0.009342 |
| 31Mar2011 | 7689  | 858.47  | -5.67211 | 3 _..LETGIKPI Splice@chr | 1.48E-12 | 0        |
| 31Mar2011 | 8487  | 535.61  | -24.9644 | 3 _..NDANLKI chr4@106    | 2.37E-10 | 0.003587 |
| 31Mar2011 | 10178 | 634.84  | 6.410455 | 2 R.VDIGDILF Splice@chr  | 3.98E-13 | 0        |
| 31Mar2011 | 4079  | 1116.65 | 11.05125 | 1 K.INLKVNSI chr2@701    | 5.87E-10 | 0.00854  |

|           |       |         |          |                          |          |          |
|-----------|-------|---------|----------|--------------------------|----------|----------|
| 31Mar2011 | 7399  | 962.48  | 13.7521  | 2 R.AYFHVTN chr1@1005    | 2.20E-10 | 0.003587 |
| 31Mar2011 | 10677 | 962.8   | 19.96909 | 3 _..GCSIVPIS Splice@chr | 1.13E-11 | 2.63E-04 |
| 31Mar2011 | 10314 | 491.64  | 23.22207 | 3 R.LLLDKPLF Splice@chr  | 6.90E-10 | 0.009752 |
| 31Mar2011 | 10731 | 1147.25 | 13.44098 | 3 R.FQSAAIG Splice@chr   | 1.39E-15 | 0        |
| 31Mar2011 | 5419  | 1075.05 | -16.1169 | 2 R.TCSK+14. chr2@1253   | 2.70E-10 | 0.004017 |
| 31Mar2011 | 6019  | 705.83  | -3.72364 | 2 M.PSMEEV chr5@4890     | 7.66E-15 | 0        |
| 31Mar2011 | 7648  | 858.48  | 6.006088 | 3 _..LETGIKPI Splice@chr | 6.35E-12 | 0        |
| 31Mar2011 | 3347  | 677.95  | 22.60469 | 2 R.QLKVIGR chrX@3498    | 2.78E-10 | 0.004017 |
| 31Mar2011 | 1376  | 493.61  | 28.00299 | 3 _..FQRHNLN chrX@1408   | 4.34E-10 | 0.006315 |
| 31Mar2011 | 6065  | 705.83  | -3.72364 | 2 M.PSMEEV chr5@4890     | 1.52E-13 | 0        |
| 31Mar2011 | 3302  | 527.95  | 11.73747 | 3 K.SVVSISSE chr4@1045   | 4.32E-10 | 0.006315 |
| 31Mar2011 | 2630  | 422.24  | -14.1272 | 2 R.KVHGFAO chr4@4031    | 7.49E-11 | 0.001441 |
| 31Mar2011 | 8768  | 611     | 13.71695 | 3 _..WFMEKT chr5@1462    | 3.38E-10 | 0.005282 |
| 31Mar2011 | 6360  | 833.42  | 6.892432 | 2 _..IDM+15.5 chrX@3237  | 1.61E-10 | 0.002271 |
| 31Mar2011 | 2294  | 423.26  | 23.30279 | 2 K.LGAETVV chr2@6180    | 3.00E-10 | 0.004423 |
| 31Mar2011 | 1528  | 548.28  | -5.99626 | 4 R.KVDK+14 chr3@5261    | 5.23E-10 | 0.009446 |
| 31Mar2011 | 1260  | 493.61  | 28.00299 | 3 _..FQRHNLN chrX@1408   | 2.68E-10 | 0.004215 |
| 31Mar2011 | 7632  | 753.96  | 0.162122 | 2 K.K+14.016 chr2@1375   | 2.22E-11 | 4.90E-04 |
| 31Mar2011 | 3249  | 1025.61 | -11.6755 | 1 K.LGLGSGL chr5@4945    | 1.32E-11 | 2.59E-04 |
| 31Mar2011 | 10876 | 550.63  | 9.075933 | 3 R.CFELFLK+ chrX@2485   | 2.00E-10 | 0.002706 |
| 31Mar2011 | 7097  | 829.92  | 14.84752 | 2 R.MVDQIKI chr5@1875    | 4.84E-10 | 0.00903  |
| 31Mar2011 | 5830  | 705.84  | 10.47814 | 2 M.PSMEEV chr5@4890     | 3.69E-15 | 0        |
| 31Mar2011 | 1797  | 713.06  | -21.1431 | 3 K.TKIK+14.1 chrX@3026  | 2.40E-10 | 0.003342 |
| 31Mar2011 | 9976  | 634.84  | 6.410455 | 2 R.VDIGDILF Splice@chr  | 4.50E-12 | 0        |
| 31Mar2011 | 7666  | 753.96  | 0.162122 | 2 K.K+14.016 chr2@1375   | 6.95E-11 | 0.00118  |
| 31Mar2011 | 5955  | 671.37  | -24.0361 | 2 T.FNIVHTQ Splice@chr   | 8.17E-11 | 0.00141  |
| 31Mar2011 | 7193  | 833.93  | -9.2006  | 2 _..IIEPYVAV Splice@chr | 9.43E-11 | 0.001636 |
| 31Mar2011 | 5970  | 705.83  | -3.72364 | 2 M.PSMEEV Splice@chr    | 2.33E-13 | 0        |
| 31Mar2011 | 5917  | 705.83  | -3.72364 | 2 M.PSMEEV Splice@chr    | 1.00E-12 | 0        |
| 31Mar2011 | 7231  | 833.93  | -9.2006  | 2 _..IIEPYVAV Splice@chr | 4.71E-10 | 0.008429 |
| 31Mar2011 | 2322  | 566.81  | 0.647242 | 2 I.RIPLDYAE chr5@2047   | 5.08E-11 | 7.26E-04 |
| 31Mar2011 | 8339  | 1119.6  | -18.7499 | 2 K.FFYRK+14 chrX@1590   | 5.03E-10 | 0.00903  |
| 31Mar2011 | 6392  | 554.26  | 6.682444 | 2 R.M+15.99 Splice@chr   | 1.69E-11 | 2.59E-04 |
| 31Mar2011 | 8235  | 785.42  | 22.95449 | 1 _..MPAWAF chr2@1115    | 2.85E-11 | 4.90E-04 |
| 31Mar2011 | 6233  | 748.72  | -26.0118 | 3 R.LPSKENL chr4@5635    | 6.27E-11 | 9.56E-04 |
| 31Mar2011 | 8195  | 785.42  | 22.95449 | 1 _..MPAWAF chr2@1115    | 2.73E-11 | 4.90E-04 |
| 31Mar2011 | 5867  | 705.83  | -3.72364 | 2 M.PSMEEV chr5@4890     | 2.46E-15 | 0        |
| 31Mar2011 | 1765  | 713.06  | -21.1431 | 3 K.TKIK+14.1 chrX@3026  | 4.99E-10 | 0.00903  |
| 31Mar2011 | 7159  | 607     | -9.70672 | 3 I.NRFNISK chrX@1250    | 7.56E-11 | 0.00118  |
| 31Mar2011 | 8645  | 835.45  | -7.2977  | 4 R.K+14.016 chrX@9996   | 2.03E-10 | 0.002923 |
| 31Mar2011 | 4210  | 456.75  | -25.512  | 2 K.ITLESPR chr5@5111    | 8.00E-11 | 0.00118  |
| 31Mar2011 | 597   | 764.39  | 8.635064 | 2 F.EGESQCL chr5@1706    | 5.23E-10 | 0.009446 |
| 31Mar2011 | 7372  | 858.48  | 6.006088 | 3 _..LETGIKPI Splice@chr | 4.93E-13 | 0        |
| 31Mar2011 | 4849  | 705.83  | -3.72364 | 2 M.PSMEEV Splice@chr    | 8.57E-13 | 0        |
| 31Mar2011 | 4683  | 604.33  | 18.58137 | 2 _..KDK+14.0 chrX@1077  | 4.48E-10 | 0.007228 |
| 31Mar2011 | 7794  | 859.66  | -22.4616 | 4 _..ISMTNSN chrX@1761   | 5.19E-10 | 0.008133 |
| 31Mar2011 | 8209  | 491.64  | 23.22207 | 3 R.LLLDKPLF Splice@chr  | 1.24E-10 | 0.001676 |

|           |       |         |          |                          |          |          |
|-----------|-------|---------|----------|--------------------------|----------|----------|
| 31Mar2011 | 6719  | 854.92  | -17.9855 | 2 _ .KSFEVAIE Splice@chr | 3.06E-13 | 0        |
| 31Mar2011 | 4763  | 705.83  | -3.72364 | 2 M.PSMEEV chr5@4890     | 1.52E-15 | 0        |
| 31Mar2011 | 987   | 493.61  | 28.00299 | 3 _ .FQRHNL chrX@1408    | 4.97E-10 | 0.007524 |
| 31Mar2011 | 2666  | 677.95  | 22.60469 | 2 R.QLKVIGR chrX@3498    | 3.68E-11 | 3.54E-04 |
| 31Mar2011 | 6573  | 965.51  | 6.961015 | 4 R.KTSSCQK chr5@2085    | 4.11E-10 | 0.007228 |
| 31Mar2011 | 7757  | 1003.18 | 7.145987 | 3 R.CWNRRA Splice@chr    | 1.57E-11 | 0        |
| 31Mar2011 | 8457  | 1116.22 | 16.71106 | 3 K.QAFDDAI Splice@chr   | 2.15E-10 | 0.002603 |
| 31Mar2011 | 5050  | 724.06  | 2.506414 | 3 R.NELEVFK chr1@1385    | 2.57E-10 | 0.003554 |
| 31Mar2011 | 7675  | 819.1   | 29.38392 | 3 K.QNSVQG Splice@chr    | 3.38E-10 | 0.005428 |
| 31Mar2011 | 4807  | 705.83  | -3.72364 | 2 M.PSMEEV chr5@4890     | 8.54E-15 | 0        |
| 31Mar2011 | 8109  | 634.83  | -9.39461 | 2 R.VDIGDILF Splice@chr  | 5.18E-13 | 0        |
| 31Mar2011 | 5916  | 833.93  | -9.2006  | 2 _ .IIEPYVAV Splice@chr | 1.40E-10 | 0.001992 |
| 31Mar2011 | 1760  | 423.26  | 23.30279 | 2 K.LGAETVV chr2@6180    | 5.73E-10 | 0.009645 |
| 31Mar2011 | 6714  | 785.42  | 22.95449 | 1 _ .MPAWAF chr2@1115    | 1.61E-11 | 0        |
| 31Mar2011 | 5014  | 724.06  | 2.506414 | 3 R.NELEVFK chr1@1385    | 5.59E-10 | 0.009645 |
| 31Mar2011 | 2776  | 517.95  | -12.3578 | 3 K.NLK+14.C chr5@1571   | 5.80E-10 | 0.009944 |
| 31Mar2011 | 1098  | 562.31  | -13.4391 | 2 R.FYLLYLYK Splice@chr  | 4.72E-11 | 0.001155 |
| 31Mar2011 | 11897 | 634.84  | 6.410455 | 2 R.VDIGDILF Splice@chr  | 2.02E-12 | 0        |
| 31Mar2011 | 11274 | 1003.19 | 17.13413 | 3 R.CWNRRA Splice@chr    | 3.64E-11 | 7.95E-04 |
| 31Mar2011 | 1239  | 452.26  | -4.66636 | 2 R.VLHNAPF chr2@1406    | 2.73E-11 | 7.95E-04 |
| 31Mar2011 | 10560 | 641.36  | 4.696963 | 4 A.EITEMLPi Splice@chr  | 1.07E-11 | 4.15E-04 |
| 31Mar2011 | 7148  | 671.37  | -24.0361 | 2 T.FNIVHTQ Splice@chr   | 4.49E-10 | 0.007162 |
| 31Mar2011 | 9174  | 622.33  | 9.587405 | 2 R.AK+14.01 chr2@4270   | 4.49E-10 | 0.007162 |
| 31Mar2011 | 8523  | 606.67  | -2.35139 | 3 I.NRFNISLK chrX@1250   | 9.68E-11 | 0.001325 |
| 31Mar2011 | 9071  | 753.96  | 0.162122 | 2 K.K+14.016 chr2@1375   | 6.91E-12 | 4.15E-04 |
| 31Mar2011 | 7598  | 554.26  | 6.682444 | 2 R.M+15.99 Splice@chr   | 3.23E-10 | 0.004969 |
| 31Mar2011 | 9221  | 833.42  | -19.2103 | 2 _ .IIEPYVAV Splice@chr | 8.10E-11 | 0.001325 |
| 31Mar2011 | 9223  | 622.33  | 9.587405 | 2 R.AK+14.01 chr2@4270   | 3.57E-10 | 0.005651 |
| 31Mar2011 | 13220 | 960.55  | 3.504387 | 1 R.GVRRCRF chr4@3035    | 5.13E-10 | 0.008163 |
| 31Mar2011 | 9706  | 785.42  | 22.95449 | 1 _ .MPAWAF chr2@1115    | 2.85E-11 | 7.95E-04 |
| 31Mar2011 | 1067  | 562.31  | -13.4391 | 2 R.FYLLYLYK Splice@chr  | 5.42E-11 | 0.001155 |
| 31Mar2011 | 8448  | 829.92  | 14.84752 | 2 R.MVDQIKI chr5@1875    | 5.30E-10 | 0.008495 |
| 31Mar2011 | 12133 | 491.64  | 23.22207 | 3 R.LLLDKPLF Splice@chr  | 2.63E-12 | 4.15E-04 |
| 31Mar2011 | 5928  | 829.89  | -16.1259 | 2 R.FEVFEIEC chr4@7295   | 3.11E-10 | 0.004969 |
| 31Mar2011 | 10912 | 868.47  | -17.3524 | 2 L.FLWSK+1 chr2@1462    | 3.99E-11 | 7.95E-04 |
| 31Mar2011 | 8988  | 803.43  | 10.08618 | 2 R.FGFEEGS chr3@6206    | 6.17E-11 | 0.001155 |
| 31Mar2011 | 12663 | 1147.25 | 13.44098 | 3 R.FQSAAIG Splice@chr   | 5.30E-15 | 0        |
| 31Mar2011 | 12115 | 491.64  | 23.22207 | 3 R.LLLDKPLF Splice@chr  | 2.88E-10 | 0.00464  |
| 31Mar2011 | 2630  | 437.23  | -20.8939 | 3 I.LVWGGG chrX@2603     | 6.11E-10 | 0.009819 |
| 31Mar2011 | 10669 | 1143.87 | 4.220916 | 3 K.NMITGTS Splice@chr   | 1.57E-11 | 4.15E-04 |
| 31Mar2011 | 11506 | 757.41  | -6.93941 | 2 _ .GSDLLAG Splice@chr  | 1.55E-10 | 0.002031 |
| 31Mar2011 | 9717  | 778.9   | -26.6764 | 2 R.EWNVVN chr1@1438     | 4.11E-11 | 9.88E-04 |
| 31Mar2011 | 8557  | 833.93  | -9.2006  | 2 _ .IIEPYVAV Splice@chr | 4.88E-10 | 0.008013 |
| 31Mar2011 | 11692 | 783.45  | -3.51026 | 2 K.MLKK+14 chr5@1675    | 3.84E-10 | 0.00599  |
| 31Mar2011 | 7836  | 616.97  | -16.4893 | 3 R.MSQEVA Splice@chr    | 3.25E-14 | 0        |
| 31Mar2011 | 12787 | 828.38  | -20.1128 | 2 K.PNLK+14 chr2@3862    | 3.44E-10 | 0.005487 |
| 31Mar2011 | 8945  | 803.43  | 10.08618 | 2 R.FGFEEGS chr3@6206    | 1.42E-10 | 0.00185  |

|           |       |         |          |                         |          |          |
|-----------|-------|---------|----------|-------------------------|----------|----------|
| 31Mar2011 | 8362  | 760.92  | 4.096271 | 2 R.FLIDISCV Splice@chr | 1.01E-10 | 0.001509 |
| 31Mar2011 | 8510  | 1134.05 | -14.1995 | 2 _IPSAVGY Splice@chr   | 4.06E-13 | 0        |
| 31Mar2011 | 7348  | 606.86  | 28.10799 | 2 R.VLPTVFY chr5@1167   | 1.29E-10 | 0.00167  |
| 31Mar2011 | 13079 | 1105.21 | -11.0549 | 3 K.LAFDDAI Splice@chr  | 1.05E-10 | 0.00167  |
| 31Mar2011 | 8757  | 858.48  | 6.006088 | 3 _LETGIKPI Splice@chr  | 9.79E-14 | 0        |
| 31Mar2011 | 9029  | 753.96  | 0.162122 | 2 K.K+14.016 chr2@1375  | 2.39E-10 | 0.004123 |
| 31Mar2011 | 13061 | 1105.21 | -11.0549 | 3 K.LAFDDAI Splice@chr  | 1.95E-10 | 0.002734 |
| 31Mar2011 | 9453  | 695.36  | -28.1907 | 2 H.QHYSLIK Splice@chr  | 4.90E-10 | 0.008013 |
| 31Mar2011 | 8807  | 858.48  | 6.006088 | 3 _LETGIKPI Splice@chr  | 1.65E-10 | 0.002387 |
| 31Mar2011 | 5075  | 437.46  | 16.92139 | 4 R.RGDVPEI chr3@1335   | 4.32E-10 | 0.006649 |
| 31Mar2011 | 11963 | 980.12  | -17.106  | 3 K.AVPFVPI Splice@chr  | 6.06E-10 | 0.009819 |
| 31Mar2011 | 7194  | 671.37  | -24.0361 | 2 T.FNIVHTQ Splice@chr  | 5.51E-10 | 0.008816 |
| 31Mar2011 | 12519 | 1165.58 | -1.37991 | 3 _DNKSWH chrX@1030     | 5.56E-10 | 0.008816 |
| 31Mar2011 | 9096  | 833.93  | -9.2006  | 2 _IIEPYVAV Splice@chr  | 2.39E-10 | 0.003519 |
| 31Mar2011 | 7370  | 705.84  | 10.47814 | 2 M.PSMEEV chr5@4890    | 1.86E-14 | 0        |
| 31Mar2011 | 9763  | 833.42  | -19.2103 | 2 _IIEPYVAV Splice@chr  | 1.78E-10 | 0.003052 |
| 31Mar2011 | 1256  | 464.24  | -7.11495 | 2 K.ETSFSTK chr4@8236   | 2.71E-10 | 0.004666 |
| 31Mar2011 | 9572  | 744.39  | 26.99177 | 2 L.FTENLTTI chr5@1256  | 2.00E-10 | 0.003217 |
| 31Mar2011 | 9639  | 753.96  | 0.162122 | 2 K.K+14.016 chr2@1375  | 9.30E-12 | 4.03E-04 |
| 31Mar2011 | 8055  | 554.26  | 6.682444 | 2 R.M+15.99 Splice@chr  | 2.70E-10 | 0.004666 |
| 31Mar2011 | 9808  | 833.42  | -19.2103 | 2 _IIEPYVAV Splice@chr  | 5.60E-11 | 0.001266 |
| 31Mar2011 | 7903  | 1111.11 | -2.0893  | 2 R.LLM+15.5 chr4@3284  | 1.60E-10 | 0.002899 |
| 31Mar2011 | 13435 | 1116.22 | 16.71106 | 3 K.QAFDDAI Splice@chr  | 6.43E-11 | 0.001621 |
| 31Mar2011 | 10269 | 785.42  | 22.95449 | 1 _MPAWAF chr2@1115     | 1.31E-10 | 0.00258  |
| 31Mar2011 | 5270  | 1116.65 | 11.05125 | 1 K.INLKVNSI chr2@7016  | 3.29E-10 | 0.006425 |
| 31Mar2011 | 979   | 420.68  | -22.1784 | 2 R.MMTGTG chrX@9534    | 2.75E-12 | 2.03E-04 |
| 31Mar2011 | 12193 | 884.08  | 3.225463 | 3 R.YRVDLAF chr5@6435   | 2.80E-11 | 7.46E-04 |
| 31Mar2011 | 1219  | 464.24  | -7.11495 | 2 K.ETSFSTK chr4@8236   | 1.35E-10 | 0.00258  |
| 31Mar2011 | 1204  | 764.39  | 8.635064 | 2 F.EGESQCL chr5@1706   | 5.29E-10 | 0.009663 |
| 31Mar2011 | 13983 | 809.01  | -7.47824 | 2 R.FTTELLLL chr3@8986  | 4.34E-10 | 0.008612 |
| 31Mar2011 | 2836  | 437.23  | -20.8939 | 3 I.LVWGGG chrX@2605    | 4.23E-10 | 0.008494 |
| 31Mar2011 | 9075  | 606.67  | -2.35139 | 3 I.NRFNISLK chrX@1250  | 1.04E-10 | 0.00258  |
| 31Mar2011 | 12263 | 582.65  | 15.01592 | 3 R.SIFVDLEP Splice@chr | 2.70E-10 | 0.004666 |
| 31Mar2011 | 7529  | 671.37  | -24.0361 | 2 T.FNIVHTQ Splice@chr  | 4.28E-10 | 0.008612 |
| 31Mar2011 | 9594  | 753.96  | 0.162122 | 2 K.K+14.016 chr2@1375  | 5.32E-11 | 0.001266 |
| 31Mar2011 | 1278  | 562.31  | -13.4391 | 2 R.FYLLYLYK Splice@chr | 5.04E-11 | 0.001095 |
| 31Mar2011 | 10317 | 785.42  | 22.95449 | 1 _MPAWAF chr2@1115     | 3.46E-11 | 7.46E-04 |
| 31Mar2011 | 1242  | 562.31  | -13.4391 | 2 R.FYLLYLYK Splice@chr | 5.08E-11 | 0.001095 |
| 31Mar2011 | 9324  | 858.48  | 6.006088 | 3 _LETGIKPI Splice@chr  | 3.80E-12 | 2.03E-04 |
| 31Mar2011 | 10661 | 468.91  | -17.4792 | 3 K.TSRNAFK chr1@3696   | 2.42E-10 | 0.003519 |
| 31Mar2011 | 14124 | 1105.21 | -11.0549 | 3 K.LAFDDAI Splice@chr  | 1.55E-12 | 0        |
| 31Mar2011 | 9541  | 803.42  | -2.39619 | 2 R.FGFEEGS chr3@6206   | 9.59E-11 | 0.002286 |
| 31Mar2011 | 5729  | 633.38  | 0.386071 | 2 R.K+14.016 chr5@2465  | 3.99E-10 | 0.008024 |
| 31Mar2011 | 7671  | 671.37  | -24.0361 | 2 T.FNIVHTQ Splice@chr  | 3.33E-10 | 0.006425 |
| 31Mar2011 | 12482 | 783.45  | -3.51026 | 2 K.MLKK+14 chr5@1675   | 5.00E-10 | 0.009347 |
| 31Mar2011 | 10997 | 780.12  | -1.54042 | 3 L.SQK+14.C chrX@3940  | 1.23E-10 | 0.00258  |
| 31Mar2011 | 12671 | 634.84  | 6.410455 | 2 R.VDIGDILF Splice@chr | 8.72E-13 | 0        |

|           |       |         |          |                         |          |          |
|-----------|-------|---------|----------|-------------------------|----------|----------|
| 31Mar2011 | 7152  | 622.33  | 3.688505 | 2 K.EREREKEI chrX@1638  | 4.48E-10 | 0.008612 |
| 31Mar2011 | 9062  | 1134.05 | -14.1995 | 2 _IPSAVGYI Splice@chr  | 2.70E-14 | 0        |
| 31Mar2011 | 10242 | 778.9   | -26.6764 | 2 R.EWNVVN chr1@1438    | 3.11E-11 | 7.46E-04 |
| 31Mar2011 | 11618 | 868.47  | -17.3524 | 2 L.FLWSK+1 chr2@1462   | 8.11E-11 | 0.002286 |
| 31Mar2011 | 12994 | 968.13  | 18.26018 | 3 _GCSIVPIS Splice@chr  | 6.40E-11 | 0.001442 |
| 31Mar2011 | 3505  | 693.87  | -6.6949  | 2 V.ICVAVGD chr5@1063   | 6.07E-11 | 9.89E-04 |
| 31Mar2011 | 12388 | 1165.59 | 7.287679 | 3 _DNKSWH chrX@1030     | 1.66E-11 | 2.12E-04 |
| 31Mar2011 | 1889  | 488.28  | 18.24649 | 2 K.INAEFVG chr4@4519   | 3.56E-10 | 0.004732 |
| 31Mar2011 | 6967  | 844.43  | 17.99527 | 2 _EGDGEIEI Splice@chr  | 3.02E-11 | 4.18E-04 |
| 31Mar2011 | 8967  | 753.96  | 0.162122 | 2 K.K+14.016 chr2@1375  | 3.10E-10 | 0.004399 |
| 31Mar2011 | 8467  | 607     | -9.70672 | 3 I.NRFNISK chrX@1250   | 7.21E-11 | 9.89E-04 |
| 31Mar2011 | 12710 | 828.39  | -8.00743 | 2 K.PNLK+14 chr2@3862   | 2.39E-11 | 2.12E-04 |
| 31Mar2011 | 2613  | 1019.56 | 9.65939  | 1 R.NCLRSIQI Splice@chr | 1.77E-10 | 0.002427 |
| 31Mar2011 | 5133  | 1116.65 | 11.05125 | 1 K.INLKVNSI chr2@7016  | 2.94E-10 | 0.004046 |
| 31Mar2011 | 6995  | 523.62  | 6.773786 | 3 I.VFQNFVP chr2@1513   | 1.04E-10 | 0.001357 |
| 31Mar2011 | 9376  | 1141.62 | 4.816002 | 1 _YLFDTITLE chr2@1007  | 2.35E-10 | 0.002794 |
| 31Mar2011 | 4241  | 677.95  | 22.60469 | 2 R.QLKVIGR chrX@3498   | 3.25E-10 | 0.004554 |
| 31Mar2011 | 9557  | 570.87  | 11.95477 | 2 R.KNINVTI chr1@4939   | 3.85E-10 | 0.005798 |
| 31Mar2011 | 8543  | 833.93  | -9.2006  | 2 _IIEPYVAV Splice@chr  | 2.22E-10 | 0.002427 |
| 31Mar2011 | 7020  | 705.84  | 10.47814 | 2 M.PSMEEV chr5@4890    | 4.66E-15 | 0        |
| 31Mar2011 | 6950  | 523.62  | 6.773786 | 3 I.VFQNFVP chr2@1513   | 1.25E-10 | 0.001536 |
| 31Mar2011 | 8505  | 833.93  | -9.2006  | 2 _IIEPYVAV Splice@chr  | 1.63E-10 | 0.002273 |
| 31Mar2011 | 11981 | 491.64  | 23.22207 | 3 R.LLLDKPLF Splice@chr | 5.33E-11 | 9.89E-04 |
| 31Mar2011 | 7061  | 705.83  | -3.72364 | 2 M.PSMEEV chr5@4890    | 1.40E-15 | 0        |
| 31Mar2011 | 9586  | 785.42  | 22.95449 | 1 _MPAWAF chr2@1115     | 2.85E-11 | 4.18E-04 |
| 31Mar2011 | 6010  | 572.63  | 9.609873 | 3 K.IVLFQLFN chr3@1294  | 5.49E-10 | 0.009392 |
| 31Mar2011 | 12003 | 491.64  | 23.22207 | 3 R.LLLDKPLF Splice@chr | 3.60E-11 | 6.12E-04 |
| 31Mar2011 | 10396 | 899.97  | 3.975293 | 2 R.SK+14.01 chrX@1700  | 4.52E-10 | 0.006811 |
| 31Mar2011 | 11811 | 634.84  | 6.410455 | 2 R.VDIGDILF Splice@chr | 1.07E-11 | 0        |
| 31Mar2011 | 1847  | 488.28  | 18.24649 | 2 K.INAEFVG chr4@4519   | 1.76E-10 | 0.002427 |
| 31Mar2011 | 11784 | 634.83  | -9.39461 | 2 R.VDIGDILF Splice@chr | 1.33E-12 | 0        |
| 31Mar2011 | 9118  | 622.33  | 9.587405 | 2 R.AK+14.01 chr2@4270  | 4.88E-10 | 0.007148 |
| 31Mar2011 | 3176  | 423.26  | 23.30279 | 2 K.LGAETVV chr2@6180   | 2.89E-10 | 0.00387  |
| 31Mar2011 | 1020  | 464.24  | -7.11495 | 2 K.ETSFSTK chr4@8236   | 1.35E-10 | 0.001914 |
| 31Mar2011 | 12532 | 1147.25 | 13.44098 | 3 R.FQSAAIG Splice@chr  | 5.52E-16 | 0        |
| 31Mar2011 | 8431  | 607     | -9.70672 | 3 I.NRFNISK chrX@1250   | 7.53E-11 | 9.89E-04 |
| 31Mar2011 | 7157  | 705.83  | -3.72364 | 2 M.PSMEEV chr5@4890    | 1.72E-15 | 0        |
| 31Mar2011 | 7171  | 671.37  | -24.0361 | 2 T.FNIVHTQ Splice@chr  | 4.63E-10 | 0.006811 |
| 31Mar2011 | 11931 | 1062.91 | -28.6503 | 3 C.FTKPQK+ chr3@8434   | 3.56E-11 | 6.12E-04 |
| 31Mar2011 | 7109  | 706.34  | 8.098268 | 2 M.PSMEEV chr5@4890    | 7.33E-15 | 0        |
| 31Mar2011 | 10535 | 928.01  | 17.71166 | 2 R.K+14.016 chr5@2010  | 3.86E-10 | 0.005798 |
| 31Mar2011 | 12546 | 1147.24 | 4.705638 | 3 R.FQSAAIG Splice@chr  | 1.61E-14 | 0        |
| 31Mar2011 | 2500  | 713.06  | -21.1431 | 3 K.TKIK+14.1 chrX@3026 | 4.33E-10 | 0.006486 |
| 31Mar2011 | 4431  | 677.95  | 22.60469 | 2 R.QLKVIGR chrX@3498   | 1.64E-10 | 0.001572 |
| 31Mar2011 | 1161  | 464.24  | -7.11495 | 2 K.ETSFSTK chr4@8236   | 1.58E-10 | 0.001572 |
| 31Mar2011 | 6035  | 440.24  | 24.04044 | 2 R.YNRAPM chr5@4305    | 4.74E-10 | 0.004463 |
| 31Mar2011 | 10727 | 899.97  | 3.975293 | 2 R.SK+14.01 chrX@1700  | 4.44E-10 | 0.004463 |

|           |       |         |          |                         |          |          |
|-----------|-------|---------|----------|-------------------------|----------|----------|
| 31Mar2011 | 12994 | 828.38  | -20.1128 | 2 K.PNLK+14 chr4@8345   | 1.05E-10 | 0.001012 |
| 31Mar2011 | 7678  | 625.32  | -27.4566 | 4 R.M+15.99 chrX@6806   | 8.38E-10 | 0.008272 |
| 31Mar2011 | 8731  | 607     | -9.70672 | 3 I.NRFNISLK chrX@1250  | 1.04E-10 | 0.001012 |
| 31Mar2011 | 4600  | 461.59  | -10.1596 | 3 K.FLISK+14 Splice@chr | 9.49E-11 | 8.16E-04 |
| 31Mar2011 | 11262 | 1028.99 | -16.6017 | 2 R.SQMDILC chrX@1395   | 2.47E-10 | 0.002319 |
| 31Mar2011 | 8974  | 762.43  | 16.40509 | 2 _.MK+14.0 chr4@7745   | 7.59E-10 | 0.0078   |
| 31Mar2011 | 8769  | 607     | -9.70672 | 3 I.NRFNISLK chrX@1250  | 7.16E-11 | 4.13E-04 |
| 31Mar2011 | 8190  | 701.35  | 13.82807 | 3 K.NNPYMS Splice@chr   | 5.76E-11 | 4.13E-04 |
| 31Mar2011 | 8833  | 833.93  | -9.2006  | 2 _.IIEPYVAV Splice@chr | 4.92E-10 | 0.004622 |
| 31Mar2011 | 9668  | 965.76  | 6.091444 | 4 R.K+14.016 chr5@2085  | 5.62E-10 | 0.004953 |
| 31Mar2011 | 7182  | 705.84  | 10.47814 | 2 M.PSMEEV chr5@4890    | 5.09E-15 | 0        |
| 31Mar2011 | 7327  | 705.83  | -3.72364 | 2 M.PSMEEV chr5@4890    | 1.67E-15 | 0        |
| 31Mar2011 | 3343  | 422.24  | -14.1272 | 2 R.KVHGFA chr4@4031    | 1.58E-11 | 0        |
| 31Mar2011 | 6671  | 473.24  | 8.530454 | 2 R.QNQGEE chr5@4841    | 2.09E-10 | 0.002138 |
| 31Mar2011 | 13151 | 1018.55 | -8.33756 | 2 K.LFPWRCI Splice@chr  | 8.28E-10 | 0.008118 |
| 31Mar2011 | 12200 | 491.64  | 23.22207 | 3 R.LLLDKPLF Splice@chr | 3.04E-10 | 0.002671 |
| 31Mar2011 | 12047 | 634.84  | 6.410455 | 2 R.VDIGDILF Splice@chr | 1.29E-12 | 0        |
| 31Mar2011 | 7224  | 705.83  | -3.72364 | 2 M.PSMEEV chr5@4890    | 1.65E-15 | 0        |
| 31Mar2011 | 11722 | 859.66  | -22.4616 | 4 _.ISMTNSN chrX@1761   | 3.57E-10 | 0.003598 |
| 31Mar2011 | 13010 | 828.38  | -20.1128 | 2 K.PNLK+14 chr4@8345   | 4.91E-10 | 0.004622 |
| 31Mar2011 | 12023 | 634.84  | 6.410455 | 2 R.VDIGDILF Splice@chr | 1.35E-12 | 0        |
| 31Mar2011 | 11702 | 859.91  | -23.4383 | 4 _.ISMTNSN chrX@1761   | 8.62E-10 | 0.008272 |
| 31Mar2011 | 7276  | 705.83  | -3.72364 | 2 M.PSMEEV chr5@4890    | 1.64E-15 | 0        |
| 31Mar2011 | 9891  | 854.92  | -17.9855 | 2 _.KSFEVAIE Splice@chr | 4.27E-14 | 0        |
| 31Mar2011 | 9177  | 833.42  | -19.2103 | 2 _.IIEPYVAV Splice@chr | 1.25E-10 | 0.001572 |
| 31Mar2011 | 12795 | 1147.25 | 13.44098 | 3 R.FQSAAIG Splice@chr  | 3.97E-12 | 0        |
| 31Mar2011 | 10778 | 742.88  | -6.21424 | 2 K.M+15.99 chr4@1648   | 5.40E-10 | 0.004953 |
| 31Mar2011 | 10752 | 742.88  | -6.21424 | 2 K.M+15.99 chr4@1648   | 5.89E-10 | 0.005297 |
| 31Mar2011 | 12809 | 1147.25 | 13.44098 | 3 R.FQSAAIG Splice@chr  | 6.09E-15 | 0        |
| 31Mar2011 | 13102 | 916.98  | -20.1114 | 4 R.YEKVIIFN chr5@1391  | 7.92E-10 | 0.007962 |
| 31Mar2011 | 2587  | 1019.56 | 9.65939  | 1 R.NCLRSIQI Splice@chr | 4.83E-10 | 0.004622 |
| 31Mar2011 | 1187  | 464.24  | -7.11495 | 2 K.ETSFSTKk chr4@8236  | 1.55E-10 | 0.001572 |
| 31Mar2011 | 4341  | 1025.61 | -11.6755 | 1 K.LGLGSGL chr5@4945   | 8.05E-12 | 0        |
| 31Mar2011 | 13178 | 962.8   | 16.16136 | 3 _.CSIRPISG Splice@chr | 5.22E-10 | 0.008109 |
| 31Mar2011 | 8225  | 833.42  | 6.892432 | 2 _.IDM+15.5 chrX@3237  | 6.13E-10 | 0.009494 |
| 31Mar2011 | 10303 | 785.42  | 22.95449 | 1 _.MPAWAF chr2@1115    | 2.85E-11 | 0        |
| 31Mar2011 | 764   | 420.68  | -22.1784 | 2 R.MMTGTG chrX@9534    | 2.73E-12 | 0        |
| 31Mar2011 | 2934  | 936.48  | 27.86052 | 1 K.LNGGYEC chr2@1191   | 5.78E-11 | 3.68E-04 |
| 31Mar2011 | 3509  | 584.69  | -9.76929 | 5 _.TVFYGDL chr4@5567   | 1.08E-10 | 0.001078 |
| 31Mar2011 | 1117  | 464.24  | -7.11495 | 2 K.ETSFSTKk chr4@8236  | 3.07E-10 | 0.004217 |
| 31Mar2011 | 6935  | 1075.06 | -6.79295 | 2 R.TCSK+14. chr2@1253  | 3.61E-10 | 0.004545 |
| 31Mar2011 | 13275 | 962.8   | 16.16136 | 3 _.CSIRPISG Splice@chr | 1.31E-10 | 0.001592 |
| 31Mar2011 | 12601 | 980.12  | -17.106  | 3 K.AVPFVPI Splice@chr  | 1.08E-10 | 0.001078 |
| 31Mar2011 | 9354  | 858.48  | 6.006088 | 3 _.LETGIIPi Splice@chr | 2.65E-12 | 0        |
| 31Mar2011 | 2826  | 437.23  | -20.8939 | 3 I.LVWGGG chrX@2603    | 5.21E-10 | 0.008109 |
| 31Mar2011 | 10343 | 785.42  | 22.95449 | 1 _.MPAWAF chr2@1115    | 2.04E-11 | 0        |
| 31Mar2011 | 2975  | 936.48  | 27.86052 | 1 K.LNGGYEC chr2@1191   | 1.75E-11 | 0        |

|           |       |         |          |                          |          |          |
|-----------|-------|---------|----------|--------------------------|----------|----------|
| 31Mar2011 | 5289  | 476.73  | -8.21113 | 2 R.SSHEISHF chr5@1494   | 2.24E-10 | 0.002761 |
| 31Mar2011 | 9314  | 858.48  | 6.006088 | 3 _..LETGIKPI Splice@chr | 6.17E-11 | 3.68E-04 |
| 31Mar2011 | 820   | 420.68  | -22.1784 | 2 R.MMTGTG chrX@9534     | 1.90E-11 | 0        |
| 31Mar2011 | 1056  | 444.59  | 14.03499 | 3 K.KM+15.9 chr4@1484    | 4.42E-10 | 0.005998 |
| 31Mar2011 | 13294 | 1116.22 | 16.71106 | 3 K.QAFDDAI Splice@chr   | 2.70E-10 | 0.003902 |
| 31Mar2011 | 9124  | 833.93  | -9.2006  | 2 _..IIEPYVAV Splice@chr | 1.96E-10 | 0.002428 |
| 31Mar2011 | 2661  | 741.39  | -17.2291 | 2 K.QKSNWH chr5@1229     | 2.09E-11 | 0        |
| 31Mar2011 | 10254 | 1118.93 | 20.33541 | 3 R.NWKPKT Splice@chr    | 6.64E-13 | 0        |
| 31Mar2011 | 11956 | 1003.19 | 17.13413 | 3 R.CWNRRA Splice@chr    | 7.17E-11 | 3.68E-04 |
| 31Mar2011 | 8339  | 474.51  | 25.76352 | 4 _..RNENLIEI chr5@1252  | 3.97E-10 | 0.005194 |
| 31Mar2011 | 6233  | 1017.59 | -22.5744 | 1 R.SSVIMLIV chr2@5767   | 1.88E-11 | 0        |
| 31Mar2011 | 9752  | 622.33  | 9.587405 | 2 R.AK+14.01 chr2@4270   | 2.07E-10 | 0.002596 |
| 31Mar2011 | 2756  | 741.39  | -17.2291 | 2 K.QKSNWH chr5@1229     | 4.68E-11 | 0        |
| 31Mar2011 | 1939  | 493.61  | 28.00299 | 3 _..FQRHNLH chrX@1408   | 1.14E-10 | 0.00142  |
| 31Mar2011 | 2307  | 459.58  | -21.4727 | 3 K.LSFLGTG chr5@3834    | 2.30E-10 | 0.002929 |
| 31Mar2011 | 3823  | 434.24  | 13.9946  | 3 _..RSNDQTI chr5@6378   | 2.10E-10 | 0.002761 |
| 31Mar2011 | 3315  | 423.26  | 23.30279 | 2 K.LGAETVV chr2@6180    | 5.88E-10 | 0.009186 |
| 31Mar2011 | 8066  | 1111.11 | -2.0893  | 2 R.LLM+15.5 chr4@3284   | 1.63E-10 | 0.002266 |
| 31Mar2011 | 6518  | 748.73  | -12.625  | 3 R.LPSKENL chr4@5639    | 4.78E-10 | 0.006816 |
| 31Mar2011 | 5983  | 711.85  | -2.70508 | 2 R.SLHTLFST Splice@chr  | 2.95E-11 | 0        |
| 31Mar2011 | 7524  | 583.82  | -28.5596 | 2 R.LVFPITFS chr1@2422   | 2.62E-10 | 0.003589 |
| 31Mar2011 | 9618  | 753.96  | 0.162122 | 2 K.K+14.016 chr2@1375   | 6.23E-10 | 0.009653 |
| 31Mar2011 | 8537  | 752.03  | 0.433437 | 3 _..IPSAVGY Splice@chr  | 2.74E-10 | 0.003902 |
| 31Mar2011 | 7568  | 583.82  | -28.5596 | 2 R.LVFPITFS chr1@2422   | 2.32E-10 | 0.002929 |
| 31Mar2011 | 10057 | 1141.62 | 4.816002 | 1 _..YLFIDITLE chr2@1007 | 7.90E-11 | 7.30E-04 |
| 31Mar2011 | 13222 | 1165.58 | -1.37991 | 3 _..DNKSWH chrX@1030    | 5.71E-10 | 0.009037 |
| 31Mar2011 | 1125  | 562.31  | -13.4391 | 2 R.FYLLLYLK Splice@chr  | 5.12E-11 | 0        |
| 31Mar2011 | 9658  | 753.96  | 0.162122 | 2 K.K+14.016 chr2@1375   | 1.25E-11 | 0        |
| 31Mar2011 | 12791 | 491.64  | 23.22207 | 3 R.LLLDKPLF Splice@chr  | 3.73E-10 | 0.004707 |
| 31Mar2011 | 9106  | 607     | -9.70672 | 3 I.NRFNISK chrX@1250    | 1.03E-10 | 9.00E-04 |
| 31Mar2011 | 3692  | 693.87  | -6.6949  | 2 V.ICVAVGD chr5@1063    | 3.60E-10 | 0.004545 |
| 31Mar2011 | 9168  | 833.93  | -9.2006  | 2 _..IIEPYVAV Splice@chr | 4.62E-10 | 0.006489 |
| 31Mar2011 | 6277  | 1017.59 | -22.5744 | 1 R.SSVIMLIV chr2@5767   | 4.19E-10 | 0.005347 |
| 31Mar2011 | 2876  | 476.73  | -8.21113 | 2 R.SSHEISHF chr5@1494   | 4.57E-10 | 0.006489 |
| 31Mar2011 | 7760  | 671.37  | -24.0361 | 2 T.FNIVHTQ Splice@chr   | 4.07E-10 | 0.005347 |
| 31Mar2011 | 12571 | 634.84  | 6.410455 | 2 R.VDIGDILF Splice@chr  | 5.98E-12 | 0        |
| 31Mar2011 | 2710  | 741.39  | -17.2291 | 2 K.QKSNWH chr5@1229     | 1.10E-11 | 0        |
| 31Mar2011 | 12551 | 634.84  | 6.410455 | 2 R.VDIGDILF Splice@chr  | 5.18E-12 | 0        |
| 31Mar2011 | 11549 | 889.5   | 13.53314 | 2 F.KCRKMVI Splice@chr   | 2.51E-10 | 0.003423 |
| 31Mar2011 | 4654  | 677.95  | 22.60469 | 2 R.QLKVIGR chrX@3498    | 5.75E-10 | 0.009037 |
| 31Mar2011 | 1090  | 562.31  | -13.4391 | 2 R.FYLLLYLK Splice@chr  | 4.93E-11 | 0        |
| 31Mar2011 | 12852 | 968.13  | 14.47345 | 3 _..CSIRPISG Splice@chr | 4.01E-10 | 0.005347 |
| 31Mar2011 | 3739  | 693.87  | -6.6949  | 2 V.ICVAVGD chr5@1063    | 3.01E-10 | 0.003902 |
| 31Mar2011 | 12812 | 491.64  | 23.22207 | 3 R.LLLDKPLF Splice@chr  | 1.88E-10 | 0.002428 |
| 31Mar2011 | 12587 | 730.93  | -11.0855 | 2 _..FFHKVK+ chr5@2007   | 4.12E-10 | 0.005347 |
| 31Mar2011 | 1027  | 764.39  | 8.635064 | 2 F.EGESQCL chr5@1706    | 5.08E-10 | 0.007296 |
| 31Mar2011 | 8450  | 962.49  | 24.16856 | 2 R.AYFHVTA chr1@1005    | 1.92E-10 | 0.003644 |

|           |       |         |          |                          |          |          |
|-----------|-------|---------|----------|--------------------------|----------|----------|
| 31Mar2011 | 12607 | 970.45  | -29.5364 | 3 _ .VACNKM Splice@chr   | 2.42E-10 | 0.003955 |
| 31Mar2011 | 12608 | 731.59  | -21.5395 | 4 _ .VACNKM Splice@chr   | 1.14E-10 | 0.002128 |
| 31Mar2011 | 2455  | 741.39  | -17.2291 | 2 K.QKSNWH chr5@1229     | 1.80E-10 | 0.003127 |
| 31Mar2011 | 12681 | 1147.24 | 4.705638 | 3 R.FQSAAIG Splice@chr   | 3.66E-17 | 0        |
| 31Mar2011 | 6305  | 1075.05 | -16.1169 | 2 R.TCSK+14. chr2@1253   | 5.22E-10 | 0.007447 |
| 31Mar2011 | 11455 | 884.41  | -1.81927 | 3 R.YRVDLAF chr5@6435    | 1.87E-10 | 0.003127 |
| 31Mar2011 | 1104  | 562.31  | -13.4391 | 2 R.FYLLLYLK Splice@chr  | 4.72E-11 | 0.00129  |
| 31Mar2011 | 2765  | 936.48  | 27.86052 | 1 K.LNGGYEC chr2@1191    | 6.82E-10 | 0.00979  |
| 31Mar2011 | 1318  | 506.27  | 9.784813 | 2 K.KDYSGGT chrX@1465    | 1.23E-10 | 0.002304 |
| 31Mar2011 | 9008  | 753.96  | 0.162122 | 2 K.K+14.016 chr2@1375   | 4.33E-10 | 0.006357 |
| 31Mar2011 | 9159  | 622.33  | 9.587405 | 2 R.AK+14.01 chr2@4270   | 2.63E-10 | 0.004279 |
| 31Mar2011 | 8488  | 607     | -9.70672 | 3 I.NRFNISK chrX@1250    | 1.43E-10 | 0.002809 |
| 31Mar2011 | 4589  | 450.59  | 14.30023 | 3 R.ISSLSVVE chrX@1634   | 9.97E-11 | 0.001965 |
| 31Mar2011 | 8175  | 671.37  | -24.0361 | 2 T.FNIVHTQ Splice@chr   | 1.10E-10 | 0.002128 |
| 31Mar2011 | 861   | 420.68  | -22.1784 | 2 R.MMTGTG chrX@9534     | 4.76E-12 | 0        |
| 31Mar2011 | 7335  | 724.06  | 2.506414 | 3 R.NELEVFK chr1@1385    | 5.31E-11 | 0.00129  |
| 31Mar2011 | 7031  | 730.38  | -23.8587 | 3 K.DNVVNTI chr3@7825    | 5.12E-10 | 0.007447 |
| 31Mar2011 | 7730  | 616.97  | -16.4893 | 3 R.MSQEVA Splice@chr    | 2.33E-10 | 0.003955 |
| 31Mar2011 | 808   | 420.68  | -22.1784 | 2 R.MMTGTG chrX@9534     | 2.07E-11 | 9.40E-04 |
| 31Mar2011 | 9659  | 785.42  | 22.95449 | 1 _ .MPAWAF chr2@1115    | 2.85E-11 | 9.40E-04 |
| 31Mar2011 | 8871  | 938.46  | 22.50833 | 2 R.ECSQSDS chr2@8876    | 4.38E-10 | 0.006522 |
| 31Mar2011 | 9454  | 1141.62 | 4.816002 | 1 _ .YLFDTLE chr2@1007   | 1.67E-10 | 0.003127 |
| 31Mar2011 | 1109  | 464.24  | -7.11495 | 2 K.ETSFSTKk chr4@8236   | 3.59E-10 | 0.005558 |
| 31Mar2011 | 11443 | 764.88  | -20.4406 | 4 _ .FQISAYV chr5@1733   | 5.71E-10 | 0.008074 |
| 31Mar2011 | 12147 | 491.64  | 23.22207 | 3 R.LLLDKPLF Splice@chr  | 1.85E-10 | 0.003127 |
| 31Mar2011 | 7486  | 554.26  | 6.682444 | 2 R.M+15.99 Splice@chr   | 4.54E-10 | 0.006823 |
| 31Mar2011 | 2717  | 936.48  | 27.86052 | 1 K.LNGGYEC chr2@1191    | 4.39E-11 | 0.00129  |
| 31Mar2011 | 5594  | 616.33  | -16.7632 | 2 K.LSKSVIFQ chr3@2798   | 6.59E-10 | 0.008994 |
| 31Mar2011 | 8720  | 858.48  | 6.006088 | 3 _ .LETGIKPI Splice@chr | 5.83E-13 | 0        |
| 31Mar2011 | 2967  | 571.36  | 10.76628 | 2 R.KRKQGA chr1@1385     | 2.32E-10 | 0.003955 |
| 31Mar2011 | 9114  | 622.33  | 9.587405 | 2 R.AK+14.01 chr2@4270   | 4.44E-10 | 0.006823 |
| 31Mar2011 | 8764  | 858.48  | 6.006088 | 3 _ .LETGIKPI Splice@chr | 4.82E-12 | 0        |
| 31Mar2011 | 7681  | 671.37  | -24.0361 | 2 T.FNIVHTQ Splice@chr   | 4.06E-10 | 0.006357 |
| 31Mar2011 | 5748  | 829.89  | -16.1259 | 2 R.FEVFEIEC chr4@7295   | 6.69E-10 | 0.00915  |
| 31Mar2011 | 11930 | 634.84  | 6.410455 | 2 R.VDIGDILF Splice@chr  | 7.85E-13 | 0        |
| 31Mar2011 | 4116  | 1025.61 | -11.6755 | 1 K.LGLGSG chr5@4945     | 5.38E-12 | 0        |
| 31Mar2011 | 8106  | 454.25  | -15.7105 | 3 R.VLIRINGM Splice@chr  | 3.05E-10 | 0.004745 |
| 31Mar2011 | 12510 | 962.8   | 16.16136 | 3 _ .CSIRPISG Splice@chr | 1.52E-10 | 0.002969 |
| 31Mar2011 | 8902  | 803.43  | 10.08618 | 2 R.FGFEEGS chr3@6206    | 7.73E-11 | 0.001626 |
| 31Mar2011 | 835   | 420.68  | -22.1784 | 2 R.MMTGTG chrX@9534     | 1.99E-11 | 9.40E-04 |
| 31Mar2011 | 10704 | 1143.87 | 4.220916 | 3 K.NMITGTS Splice@chr   | 4.86E-10 | 0.006971 |
| 31Mar2011 | 10812 | 931.53  | 0.362106 | 2 R.CTLLYISQ chr4@2818   | 4.85E-10 | 0.006971 |
| 31Mar2011 | 5816  | 657.04  | -26.9179 | 3 R.GNVRK+1 chrX@7490    | 2.72E-10 | 0.003861 |
| 31Mar2011 | 7697  | 968.5   | 25.53326 | 2 D.QPLMFT chr4@5813     | 6.09E-10 | 0.009385 |
| 31Mar2011 | 7333  | 833.93  | -9.2006  | 2 _ .IIEPYVAV Splice@chr | 3.93E-10 | 0.005795 |
| 31Mar2011 | 7500  | 858.48  | 6.006088 | 3 _ .LETGIKPI Splice@chr | 3.27E-14 | 0        |
| 31Mar2011 | 883   | 464.24  | -7.11495 | 2 K.ETSFSTKk chr4@8236   | 4.74E-10 | 0.007055 |

|           |       |         |          |                         |          |          |
|-----------|-------|---------|----------|-------------------------|----------|----------|
| 31Mar2011 | 2816  | 693.87  | -6.6949  | 2 V.ICVAVGD chr5@1065   | 3.49E-10 | 0.004705 |
| 31Mar2011 | 10321 | 491.64  | 23.22207 | 3 R.LLLDKPLF Splice@chr | 4.61E-10 | 0.007055 |
| 31Mar2011 | 11095 | 809.02  | 4.909957 | 2 R.FTTELLLL chr3@8986  | 3.41E-10 | 0.004705 |
| 31Mar2011 | 3554  | 1025.61 | -11.6755 | 1 K.LGLGSGL chr5@4945   | 4.97E-12 | 0        |
| 31Mar2011 | 1368  | 594.8   | -20.0434 | 2 R.KMGIEAC chr2@1114   | 4.75E-10 | 0.007055 |
| 31Mar2011 | 4847  | 1017.59 | -22.5744 | 1 R.SSVIMLIV chr2@5767  | 1.53E-10 | 0.001168 |
| 31Mar2011 | 5462  | 1075.06 | -6.79295 | 2 R.TCSK+14. chr2@1255  | 1.67E-10 | 0.001392 |
| 31Mar2011 | 4835  | 616.33  | -16.7632 | 2 K.LSKSVIFQ chr3@2798  | 6.18E-10 | 0.009559 |
| 31Mar2011 | 3964  | 538.8   | 13.73273 | 2 R.VLINSGL chr4@1655   | 6.72E-10 | 0.009768 |
| 31Mar2011 | 6098  | 671.37  | -24.0361 | 2 T.FNIVHTQ Splice@chr  | 2.43E-10 | 0.003186 |
| 31Mar2011 | 6137  | 748.73  | -12.625  | 3 R.LPSKENL chr4@5635   | 6.54E-10 | 0.009768 |
| 31Mar2011 | 9791  | 884.41  | -1.81927 | 3 R.YRVDLAF chr5@6435   | 1.48E-10 | 9.37E-04 |
| 31Mar2011 | 2917  | 434.24  | 13.9946  | 3 _RSNDQTI chr5@6378    | 5.82E-10 | 0.009178 |
| 31Mar2011 | 1586  | 917.53  | -12.9857 | 1 K.VISSLDRK chr5@9012  | 4.76E-10 | 0.007055 |
| 31Mar2011 | 8273  | 785.42  | 22.95449 | 1 _MPAWAF chr2@1115     | 2.29E-11 | 0        |
| 31Mar2011 | 10180 | 634.84  | 6.410455 | 2 R.VDIGDILF Splice@chr | 4.57E-12 | 0        |
| 31Mar2011 | 10763 | 860.68  | 2.433027 | 4 R.FQSAAIG Splice@chr  | 7.76E-13 | 0        |
| 31Mar2011 | 10646 | 1165.58 | -1.37991 | 3 _DNKSWH chrX@1030     | 6.08E-10 | 0.009385 |
| 31Mar2011 | 11170 | 1105.21 | -11.0549 | 3 K.LAFDDAI Splice@chr  | 4.67E-11 | 0        |
| 31Mar2011 | 4031  | 476.73  | -8.21113 | 2 R.SSHEISHF chr5@1494  | 8.96E-11 | 0        |
| 31Mar2011 | 6059  | 671.37  | -24.0361 | 2 T.FNIVHTQ Splice@chr  | 4.33E-10 | 0.006444 |
| 31Mar2011 | 2015  | 741.39  | -9.64508 | 2 K.FPENRHI chr2@1477   | 8.10E-11 | 0        |
| 31Mar2011 | 8719  | 835.45  | -7.2977  | 4 R.K+14.016 chrX@9996  | 2.74E-10 | 0.003861 |
| 31Mar2011 | 4894  | 1017.59 | -22.5744 | 1 R.SSVIMLIV chr2@5767  | 6.16E-10 | 0.009559 |
| 31Mar2011 | 7253  | 607     | -9.70672 | 3 I.NRFNISLK chrX@1250  | 1.16E-10 | 7.12E-04 |
| 31Mar2011 | 7727  | 753.96  | 0.162122 | 2 K.K+14.016 chr2@1375  | 1.32E-10 | 9.37E-04 |
| 31Mar2011 | 1927  | 713.06  | -21.1431 | 3 K.TKIK+14.1 chrX@3026 | 2.13E-10 | 0.002296 |
| 31Mar2011 | 6328  | 1111.11 | -2.0893  | 2 R.LLM+15.5 chr4@3284  | 3.09E-10 | 0.004283 |
| 31Mar2011 | 7684  | 753.96  | 0.162122 | 2 K.K+14.016 chr2@1375  | 2.64E-10 | 0.003186 |
| 31Mar2011 | 9490  | 638.8   | -14.6415 | 2 R.KLWNGG chrX@3256    | 4.87E-10 | 0.007055 |
| 31Mar2011 | 4834  | 509.8   | -23.773  | 2 R.SSVIMLIV chr2@5767  | 4.54E-11 | 0        |
| 31Mar2011 | 3468  | 1025.61 | -11.6755 | 1 K.LGLGSGL chr5@4945   | 6.02E-12 | 0        |
| 31Mar2011 | 4873  | 509.8   | -23.773  | 2 R.SSVIMLIV chr2@5767  | 3.76E-11 | 0        |
| 31Mar2011 | 1938  | 741.39  | -17.2291 | 2 K.QKSNWH chr5@1225    | 8.50E-11 | 0        |
| 31Mar2011 | 2150  | 936.48  | 27.86052 | 1 K.LNGGYEC chr2@1191   | 3.56E-11 | 0        |
| 31Mar2011 | 7461  | 858.48  | 6.006088 | 3 _LETGIKPI Splice@chr  | 8.34E-14 | 0        |
| 31Mar2011 | 10754 | 860.69  | 14.08015 | 4 R.FQSAAIG Splice@chr  | 1.04E-12 | 0        |
| 31Mar2011 | 1976  | 741.39  | -17.2291 | 2 K.QKSNWH chr5@1225    | 7.32E-11 | 0        |
| 31Mar2011 | 2189  | 936.48  | 27.86052 | 1 K.LNGGYEC chr2@1191   | 3.47E-11 | 0        |
| 31Mar2011 | 5885  | 629.07  | -23.9057 | 4 R.M+15.99 chrX@6806   | 6.65E-10 | 0.009768 |
| 31Mar2011 | 3318  | 677.95  | 22.60469 | 2 R.QLKVIGR chrX@3498   | 5.59E-11 | 0        |
| 31Mar2011 | 10154 | 634.83  | -9.39461 | 2 R.VDIGDILF Splice@chr | 5.40E-12 | 0        |
| 31Mar2011 | 4795  | 616.33  | -16.7632 | 2 K.LSKSVIFQ chr3@2798  | 5.65E-10 | 0.008549 |
| 31Mar2011 | 11492 | 809.02  | 4.909957 | 2 R.FTTELLLL chr3@8986  | 1.14E-10 | 0.002398 |
| 31Mar2011 | 2887  | 474.78  | -7.40756 | 2 R.IYIPAMLI chr2@2768  | 6.78E-11 | 0.001568 |
| 31Mar2011 | 7706  | 803.43  | 10.08618 | 2 R.FGFEEGS chr3@6206   | 1.69E-10 | 0.003    |
| 31Mar2011 | 1983  | 936.48  | 27.86052 | 1 K.LNGGYEC chr2@1191   | 6.03E-10 | 0.009957 |

|           |       |         |          |                          |          |          |
|-----------|-------|---------|----------|--------------------------|----------|----------|
| 31Mar2011 | 3796  | 1116.65 | 11.05125 | 1 K.INLKVNSI chr2@7016   | 3.57E-10 | 0.005399 |
| 31Mar2011 | 8217  | 1056.56 | 28.0642  | 3 I.SRVEDDS( Splice@chr  | 5.19E-14 | 0        |
| 31Mar2011 | 10471 | 634.84  | 6.410455 | 2 R.VDIGDILF Splice@chr  | 3.17E-12 | 0        |
| 31Mar2011 | 10496 | 634.84  | 6.410455 | 2 R.VDIGDILF Splice@chr  | 5.08E-13 | 0        |
| 31Mar2011 | 7660  | 803.43  | 10.08618 | 2 R.FGFEEGS chr3@6206    | 3.32E-11 | 6.97E-04 |
| 31Mar2011 | 11131 | 1147.24 | 4.705638 | 3 R.FQSAAIG Splice@chr   | 7.92E-16 | 0        |
| 31Mar2011 | 1943  | 936.48  | 27.86052 | 1 K.LNGGYEC chr2@1191    | 4.20E-11 | 6.97E-04 |
| 31Mar2011 | 7903  | 833.42  | -19.2103 | 2 _..IIEPYVAV Splice@chr | 1.94E-10 | 0.00361  |
| 31Mar2011 | 10697 | 491.64  | 23.22207 | 3 R.LLLDKPLF Splice@chr  | 2.94E-11 | 6.97E-04 |
| 31Mar2011 | 10743 | 968.13  | 14.47345 | 3 _..CSIRPISG Splice@chr | 1.56E-11 | 2.39E-04 |
| 31Mar2011 | 7797  | 753.96  | 0.162122 | 2 K.K+14.016 chr2@1375   | 1.86E-11 | 2.39E-04 |
| 31Mar2011 | 10713 | 491.64  | 23.22207 | 3 R.LLLDKPLF Splice@chr  | 4.91E-11 | 0.001145 |
| 31Mar2011 | 9221  | 1109.25 | 3.965332 | 3 K.LTFM+15 Splice@chr   | 4.82E-10 | 0.008007 |
| 31Mar2011 | 9553  | 868.47  | -17.3524 | 2 L.FLWSK+1 chr2@1462    | 9.83E-11 | 0.002398 |
| 31Mar2011 | 7757  | 753.96  | 0.162122 | 2 K.K+14.016 chr2@1375   | 3.45E-11 | 6.97E-04 |
| 31Mar2011 | 7885  | 622.33  | 9.587405 | 2 R.AK+14.01 chr2@4270   | 4.62E-10 | 0.006804 |
| 31Mar2011 | 7257  | 607     | -9.70672 | 3 I.NRFNISLK chrX@1250   | 1.04E-10 | 0.002398 |
| 31Mar2011 | 9712  | 953.26  | 20.59712 | 4 _..SDNDLFE Splice@chr  | 4.87E-10 | 0.008007 |
| 31Mar2011 | 7297  | 607     | -9.70672 | 3 I.NRFNISLK chrX@1250   | 3.49E-10 | 0.005201 |
| 31Mar2011 | 9995  | 672.59  | -4.41756 | 5 R.KVSNVQ\ chr5@8812    | 4.48E-10 | 0.006601 |
| 31Mar2011 | 10111 | 1007.86 | 15.19559 | 3 R.CWNRRA Splice@chr    | 3.22E-11 | 6.97E-04 |
| 31Mar2011 | 11144 | 1147.24 | 4.705638 | 3 R.FQSAAIG Splice@chr   | 2.19E-14 | 0        |
| 31Mar2011 | 1762  | 543.28  | -23.5233 | 2 K.SLHQLLC chr1@1303    | 9.56E-11 | 0.002217 |
| 31Mar2011 | 3576  | 517.96  | 7.005376 | 3 K.NLK+14.0 chr5@1571   | 9.59E-11 | 0.002217 |
| 31Mar2011 | 7546  | 938.46  | 22.50833 | 2 R.ECSQSDS chr2@8876    | 2.97E-10 | 0.004398 |
| 31Mar2011 | 7468  | 858.48  | 6.006088 | 3 _..LETGIKPI Splice@chr | 7.06E-14 | 0        |
| 31Mar2011 | 8395  | 785.42  | 22.95449 | 1 _..MPAWAF chr2@1115    | 2.85E-11 | 6.97E-04 |
| 31Mar2011 | 9750  | 1028.98 | -26.3436 | 2 R.SQMDILC chrX@1399    | 2.96E-10 | 0.004398 |
| 31Mar2011 | 3633  | 450.59  | 14.30023 | 3 R.ISSLSVVE chrX@1634   | 4.68E-11 | 0.001145 |
| 31Mar2011 | 3357  | 522.31  | -23.2988 | 2 C.PTLLPPLF chr2@1388   | 1.15E-10 | 0.002398 |
| 31Mar2011 | 10684 | 491.64  | 23.22207 | 3 R.LLLDKPLF Splice@chr  | 4.11E-11 | 6.97E-04 |
| 31Mar2011 | 9879  | 890.24  | -10.83   | 4 _..MYSSK+1 Splice@chr  | 5.46E-10 | 0.00898  |
| 31Mar2011 | 8805  | 835.45  | -7.2977  | 4 R.K+14.016 chrX@9996   | 5.62E-10 | 0.009174 |
| 31Mar2011 | 7408  | 753.96  | 0.162122 | 2 K.K+14.016 chr2@1375   | 7.51E-11 | 0.001103 |
| 31Mar2011 | 1839  | 741.39  | -17.2291 | 2 K.QKSNWH chr5@1229     | 1.43E-10 | 0.002923 |
| 31Mar2011 | 6947  | 855.41  | -22.1447 | 2 _..HVQEVAI Splice@chr  | 7.96E-11 | 0.001375 |
| 31Mar2011 | 7365  | 753.95  | -13.1319 | 2 K.K+14.016 chr2@1375   | 2.16E-11 | 5.94E-04 |
| 31Mar2011 | 4311  | 571.86  | -2.35222 | 2 T.KKGDIVEI chr5@1238   | 4.07E-10 | 0.00785  |
| 31Mar2011 | 6967  | 833.94  | 2.824179 | 2 _..IIEPYVAV Splice@chr | 1.24E-10 | 0.002151 |
| 31Mar2011 | 4623  | 509.8   | -23.773  | 2 R.SSVIMLIV chr2@5767   | 3.76E-11 | 8.53E-04 |
| 31Mar2011 | 6924  | 607     | -9.70672 | 3 I.NRFNISLK chrX@1250   | 8.79E-11 | 0.001888 |
| 31Mar2011 | 3544  | 665.88  | -25.2158 | 2 _..ILYYFLKIE chr3@2365 | 1.81E-10 | 0.003426 |
| 31Mar2011 | 1283  | 493.61  | 28.00299 | 3 _..FQRHNLN chrX@1408   | 4.13E-10 | 0.00785  |
| 31Mar2011 | 6080  | 724.06  | 2.506414 | 3 R.NELEVFK chr1@1385    | 2.02E-10 | 0.003669 |
| 31Mar2011 | 4580  | 509.8   | -23.773  | 2 R.SSVIMLIV chr2@5767   | 5.33E-11 | 0.001103 |
| 31Mar2011 | 5307  | 626.31  | 6.247018 | 2 K.SEELMYN chr4@2673    | 1.16E-13 | 0        |
| 31Mar2011 | 3240  | 677.95  | 22.60469 | 2 R.QLKVIGR chrX@3498    | 6.69E-11 | 0.001103 |

|           |       |         |          |                         |          |          |
|-----------|-------|---------|----------|-------------------------|----------|----------|
| 31Mar2011 | 7833  | 983.96  | -5.49698 | 2 R.SFSTIPDS chr2@1305  | 3.91E-13 | 0        |
| 31Mar2011 | 3816  | 476.73  | -8.21113 | 2 R.SSHEISHF chr5@1494  | 2.58E-10 | 0.00544  |
| 31Mar2011 | 2006  | 936.48  | 27.86052 | 1 K.LNGGYEC chr2@1191   | 2.91E-11 | 8.53E-04 |
| 31Mar2011 | 2457  | 422.24  | -14.1272 | 2 R.KVHGFA chr4@4031    | 1.35E-11 | 5.94E-04 |
| 31Mar2011 | 2042  | 936.48  | 27.86052 | 1 K.LNGGYEC chr2@1191   | 2.71E-11 | 8.53E-04 |
| 31Mar2011 | 1277  | 409.23  | -22.327  | 3 R.LSHALSG chr1@5436   | 2.99E-10 | 0.00619  |
| 31Mar2011 | 6678  | 801.71  | 5.720343 | 3 K.FFKPNTD chr5@7527   | 2.50E-16 | 0        |
| 31Mar2011 | 7921  | 785.42  | 22.95449 | 1 _M.PAWAF chr2@1115    | 1.48E-11 | 5.94E-04 |
| 31Mar2011 | 1258  | 493.61  | 28.00299 | 3 _FQRHNL chrX@1408     | 5.26E-10 | 0.009531 |
| 31Mar2011 | 4115  | 717.93  | -1.61756 | 2 _EELRLQL chr4@1110    | 2.35E-10 | 0.004939 |
| 31Mar2011 | 1406  | 626.82  | -18.5922 | 2 W.QFDLGK Splice@chr   | 4.11E-10 | 0.00785  |
| 31Mar2011 | 10100 | 809.01  | -7.47824 | 2 R.FTTELLLL chr3@8986  | 1.23E-10 | 0.002151 |
| 31Mar2011 | 8285  | 835.45  | -7.2977  | 4 R.K+14.016 chrX@9996  | 3.47E-10 | 0.00666  |
| 31Mar2011 | 7883  | 785.42  | 22.95449 | 1 _M.PAWAF chr2@1115    | 1.74E-11 | 5.94E-04 |
| 31Mar2011 | 5030  | 895.94  | 2.728042 | 2 K.IIGGFEDC chr4@2100  | 3.67E-18 | 0        |
| 31Mar2011 | 5521  | 657.04  | -26.9179 | 3 R.GNVRK+1 chrX@7490   | 2.32E-11 | 8.53E-04 |
| 31Mar2011 | 10374 | 1105.21 | -11.0549 | 3 K.LAFDDAI Splice@chr  | 1.90E-12 | 0        |
| 31Mar2011 | 1318  | 626.82  | -18.5922 | 2 W.QFDLGK Splice@chr   | 1.77E-10 | 0.005485 |
| 31Mar2011 | 504   | 452.23  | -1.48793 | 2 R.SGEPLSA Splice@chr  | 3.59E-11 | 4.64E-04 |
| 31Mar2011 | 528   | 452.23  | -1.48793 | 2 R.SGEPLSA Splice@chr  | 1.46E-10 | 0.004261 |
| 31Mar2011 | 520   | 452.23  | -1.48793 | 2 R.SGEPLSA Splice@chr  | 3.49E-11 | 4.64E-04 |
| 31Mar2011 | 4352  | 509.8   | -23.773  | 2 R.SSVIMLIV chr2@5767  | 4.44E-11 | 9.09E-04 |
| 31Mar2011 | 9327  | 1003.18 | 7.145987 | 3 R.CWNRRA Splice@chr   | 2.47E-11 | 0        |
| 31Mar2011 | 4476  | 1017.59 | -22.5744 | 1 R.SSVIMLIV chr2@5767  | 1.88E-11 | 0        |
| 31Mar2011 | 6139  | 748.72  | -26.0118 | 3 R.LPSKENL chr4@5639   | 2.65E-10 | 0.009967 |
| 31Mar2011 | 9303  | 1003.18 | 7.145987 | 3 R.CWNRRA Splice@chr   | 5.39E-11 | 0.001796 |
| 31Mar2011 | 8405  | 835.45  | -7.2977  | 4 R.K+14.016 chrX@9996  | 1.25E-10 | 0.003836 |
| 31Mar2011 | 4333  | 1017.59 | -22.5744 | 1 R.SSVIMLIV chr2@5767  | 6.88E-11 | 0.00221  |
| 31Mar2011 | 4453  | 509.3   | -20.473  | 2 R.SSVIMLIV chr2@5767  | 7.48E-11 | 0.00221  |
| 31Mar2011 | 4315  | 509.8   | -23.773  | 2 R.SSVIMLIV chr2@5767  | 5.51E-11 | 0.001796 |
| 31Mar2011 | 4498  | 509.3   | -20.473  | 2 R.SSVIMLIV chr2@5767  | 4.54E-11 | 9.09E-04 |
| 31Mar2011 | 497   | 452.23  | -1.48793 | 2 R.SGEPLSA Splice@chr  | 3.33E-11 | 4.64E-04 |
| 31Mar2011 | 492   | 452.23  | -1.48793 | 2 R.SGEPLSA Splice@chr  | 3.68E-11 | 4.64E-04 |
| 31Mar2011 | 8839  | 1039.03 | -2.11678 | 2 R.NSVANIG Splice@chr  | 8.36E-19 | 0        |
| 31Mar2011 | 512   | 452.23  | -1.48793 | 2 R.SGEPLSA Splice@chr  | 4.76E-11 | 9.09E-04 |
| 31Mar2011 | 1155  | 493.61  | 28.00299 | 3 _FQRHNL chrX@1408     | 1.87E-10 | 0.006318 |
| 31Mar2011 | 3861  | 822.47  | -23.826  | 2 K.KVLLVST chr1@1115   | 1.74E-10 | 0.005485 |
| 31Mar2011 | 6092  | 748.73  | -12.625  | 3 R.LPSKENL chr4@5639   | 2.16E-10 | 0.007101 |
| 31Mar2011 | 8274  | 978.99  | 0.312046 | 2 R.HYLLNLPI Splice@chr | 1.92E-10 | 0.007101 |
| 31Mar2011 | 7030  | 833.93  | -9.2006  | 2 _IIEPYVAV Splice@chr  | 6.41E-11 | 0.00221  |
| 31Mar2011 | 4405  | 509.8   | -23.773  | 2 R.SSVIMLIV chr2@5767  | 3.76E-11 | 4.64E-04 |
| 31Mar2011 | 4377  | 1017.59 | -22.5744 | 1 R.SSVIMLIV chr2@5767  | 1.88E-11 | 0        |
| 31Mar2011 | 1217  | 493.61  | 28.00299 | 3 _FQRHNL chrX@1408     | 1.06E-10 | 0.003459 |
| 31Mar2011 | 1349  | 626.82  | -18.5922 | 2 W.QFDLGK Splice@chr   | 1.40E-10 | 0.003836 |
| 31Mar2011 | 4543  | 509.3   | -20.473  | 2 R.SSVIMLIV chr2@5767  | 4.62E-11 | 9.09E-04 |
| 31Mar2011 | 11014 | 491.64  | 23.22207 | 3 R.LLLDKPLF Splice@chr | 5.57E-11 | 0.00138  |
| 31Mar2011 | 7241  | 945.45  | -23.4585 | 2 K.FSKKNMI chr4@1701   | 8.14E-11 | 0.003043 |

|           |       |         |          |                         |          |          |
|-----------|-------|---------|----------|-------------------------|----------|----------|
| 31Mar2011 | 1574  | 626.82  | -18.5922 | 2 W.QFDLGK Splice@chr   | 1.19E-10 | 0.003951 |
| 31Mar2011 | 8516  | 1182.57 | -12.6646 | 1 R.RFAENQI chr5@1775   | 2.56E-10 | 0.008926 |
| 31Mar2011 | 508   | 452.23  | -1.48793 | 2 R.SGEPLSA: Splice@chr | 3.90E-11 | 0.001065 |
| 31Mar2011 | 7282  | 945.45  | -23.4585 | 2 K.FSKKNMI chr4@1701   | 1.77E-10 | 0.005505 |
| 31Mar2011 | 520   | 452.23  | -1.48793 | 2 R.SGEPLSA: Splice@chr | 9.02E-11 | 0.003683 |
| 31Mar2011 | 5094  | 509.8   | -23.773  | 2 R.SSVIMLIV chr2@5767  | 6.43E-11 | 0.002051 |
| 31Mar2011 | 539   | 452.23  | -1.48793 | 2 R.SGEPLSA: Splice@chr | 9.76E-11 | 0.003683 |
| 31Mar2011 | 8799  | 785.42  | 22.95449 | 1 _.MPAWAF chr2@1115    | 2.29E-11 | 0.001065 |
| 31Mar2011 | 8760  | 785.42  | 22.95449 | 1 _.MPAWAF chr2@1115    | 2.85E-11 | 0.001065 |
| 31Mar2011 | 5054  | 1017.59 | -22.5744 | 1 R.SSVIMLIV chr2@5767  | 1.84E-10 | 0.005505 |
| 31Mar2011 | 10996 | 491.64  | 23.22207 | 3 R.LLLDKPLF Splice@chr | 4.64E-11 | 0.00138  |
| 31Mar2011 | 8193  | 753.96  | 0.162122 | 2 K.K+14.016 chr2@1375  | 2.29E-10 | 0.006724 |
| 31Mar2011 | 4999  | 509.8   | -23.773  | 2 R.SSVIMLIV chr2@5767  | 8.26E-11 | 0.003043 |
| 31Mar2011 | 5048  | 509.8   | -23.773  | 2 R.SSVIMLIV chr2@5767  | 5.49E-11 | 0.00138  |
| 31Mar2011 | 5100  | 1017.59 | -22.5744 | 1 R.SSVIMLIV chr2@5767  | 1.19E-10 | 0.003951 |
| 31Mar2011 | 4951  | 509.8   | -23.773  | 2 R.SSVIMLIV chr2@5767  | 6.52E-11 | 0.002051 |
| 31Mar2011 | 1895  | 713.06  | -21.1431 | 3 K.TKIK+14.1 chrX@3026 | 3.92E-10 | 0.005907 |
| 31Mar2011 | 1091  | 594.8   | -20.0434 | 2 R.KMGIEAC chr2@1114   | 3.78E-10 | 0.005724 |
| 31Mar2011 | 7848  | 785.42  | 22.95449 | 1 _.MPAWAF chr2@1115    | 1.61E-11 | 0        |
| 31Mar2011 | 1912  | 741.39  | -17.2291 | 2 K.QKSNWH chr5@1225    | 2.31E-10 | 0.003046 |
| 31Mar2011 | 901   | 464.24  | -7.11495 | 2 K.ETSFSTKk chr4@8236  | 5.03E-10 | 0.006605 |
| 31Mar2011 | 7420  | 833.42  | -19.2103 | 2 _.IIEPYVAV Splice@chr | 5.56E-10 | 0.007061 |
| 31Mar2011 | 6931  | 833.93  | -9.2006  | 2 _.IIEPYVAV Splice@chr | 2.54E-10 | 0.003284 |
| 31Mar2011 | 5684  | 705.83  | -3.72364 | 2 M.PSMEEV chr5@4890    | 6.46E-14 | 0        |
| 31Mar2011 | 9912  | 1116.22 | 16.71106 | 3 K.QAFDDAI Splice@chr  | 2.63E-11 | 0        |
| 31Mar2011 | 4855  | 673.32  | -23.1345 | 4 _.QVREMH Splice@chr   | 1.62E-10 | 0.001032 |
| 31Mar2011 | 3236  | 677.95  | 22.60469 | 2 R.QLKVIGR chrX@3498   | 1.49E-11 | 0        |
| 31Mar2011 | 7435  | 622.33  | 9.587405 | 2 R.AK+14.01 chr2@4270  | 7.16E-10 | 0.009877 |
| 31Mar2011 | 8287  | 611     | 13.71695 | 3 _.WFMEKT chr5@1462    | 3.91E-10 | 0.005907 |
| 31Mar2011 | 3338  | 677.95  | 22.60469 | 2 R.QLKVIGR chrX@3498   | 6.75E-11 | 2.66E-04 |
| 31Mar2011 | 9622  | 491.64  | 23.22207 | 3 R.LLLDKPLF Splice@chr | 3.44E-11 | 0        |
| 31Mar2011 | 4535  | 616.33  | -16.7632 | 2 K.LSKSVIFQ chr3@2798  | 6.10E-10 | 0.007748 |
| 31Mar2011 | 6901  | 833.94  | 2.824179 | 2 _.IIEPYVAV Splice@chr | 3.59E-10 | 0.005241 |
| 31Mar2011 | 8766  | 868.47  | -17.3524 | 2 L.FLWSK+1 chr2@1462   | 5.01E-10 | 0.006605 |
| 31Mar2011 | 5786  | 671.37  | -24.0361 | 2 T.FNIVHTQ Splice@chr  | 2.13E-10 | 0.003046 |
| 31Mar2011 | 5237  | 986.5   | -26.5069 | 2 K.KSKKSCA. chr1@9876  | 4.46E-10 | 0.005907 |
| 31Mar2011 | 6904  | 607     | -9.70672 | 3 I.NRFNISLK chrX@1250  | 5.70E-11 | 2.66E-04 |
| 31Mar2011 | 9474  | 634.84  | 6.410455 | 2 R.VDIGDILF Splice@chr | 1.04E-13 | 0        |
| 31Mar2011 | 4902  | 673.32  | -23.1345 | 4 _.QVREMH Splice@chr   | 7.16E-10 | 0.009877 |
| 31Mar2011 | 7296  | 753.96  | 0.162122 | 2 K.K+14.016 chr2@1375  | 1.38E-10 | 0.001032 |
| 31Mar2011 | 1283  | 493.61  | 28.00299 | 3 _.FQRHNLN chrX@1408   | 4.84E-10 | 0.006605 |
| 31Mar2011 | 10155 | 809     | -19.8664 | 2 R.FTTELLLL chr3@8986  | 6.05E-10 | 0.007748 |
| 31Mar2011 | 7095  | 858.48  | 6.006088 | 3 _.LETGIKPI Splice@chr | 1.65E-11 | 0        |
| 31Mar2011 | 7335  | 753.96  | 0.162122 | 2 K.K+14.016 chr2@1375  | 3.37E-11 | 0        |
| 31Mar2011 | 1328  | 493.61  | 28.00299 | 3 _.FQRHNLN chrX@1408   | 1.90E-10 | 0.002046 |
| 31Mar2011 | 9904  | 1116.22 | 16.71106 | 3 K.QAFDDAI Splice@chr  | 5.30E-11 | 2.66E-04 |
| 31Mar2011 | 7403  | 622.33  | 9.587405 | 2 R.AK+14.01 chr2@4270  | 6.87E-10 | 0.009413 |

|           |       |         |          |                          |          |          |
|-----------|-------|---------|----------|--------------------------|----------|----------|
| 31Mar2011 | 9612  | 491.64  | 23.22207 | 3 R.LLLDKPLF Splice@chr  | 5.64E-10 | 0.007061 |
| 31Mar2011 | 7805  | 785.42  | 22.95449 | 1 _..MPAWAF chr2@1115    | 5.07E-11 | 2.66E-04 |
| 31Mar2011 | 14079 | 970.45  | -29.5364 | 3 _..VACNKM Splice@chr   | 3.07E-10 | 0.007181 |
| 31Mar2011 | 13316 | 634.84  | 6.410455 | 2 R.VDIGDILF Splice@chr  | 1.48E-12 | 0        |
| 31Mar2011 | 14692 | 809.02  | 4.909957 | 2 R.FTTELLLL chr3@8986   | 1.24E-10 | 0.002984 |
| 31Mar2011 | 6157  | 1017.59 | -22.5744 | 1 R.SSVIMLIV chr2@5767   | 8.24E-11 | 0.002446 |
| 31Mar2011 | 10335 | 1182.56 | -21.0399 | 1 R.RFAENQI chr5@1779    | 1.32E-10 | 0.002984 |
| 31Mar2011 | 2645  | 936.48  | 27.86052 | 1 K.LNGGYEC chr2@1191    | 1.15E-10 | 0.002984 |
| 31Mar2011 | 6174  | 509.3   | -20.473  | 2 R.SSVIMLIV chr2@5767   | 9.53E-11 | 0.002825 |
| 31Mar2011 | 9425  | 833.93  | -9.2006  | 2 _..IIEPYVAV Splice@chr | 2.35E-10 | 0.006154 |
| 31Mar2011 | 1334  | 510.3   | 12.8833  | 2 R.RHVAVVF chr1@1479    | 1.31E-11 | 2.31E-04 |
| 31Mar2011 | 10126 | 622.33  | 9.587405 | 2 R.AK+14.01 chr2@4270   | 3.41E-10 | 0.007508 |
| 31Mar2011 | 12180 | 750.38  | -16.0136 | 2 V.SWQILFN Splice@chr   | 2.82E-10 | 0.007006 |
| 31Mar2011 | 5997  | 1017.59 | -22.5744 | 1 R.SSVIMLIV chr2@5767   | 3.87E-10 | 0.008764 |
| 31Mar2011 | 790   | 420.68  | -22.1784 | 2 R.MMTGTG chrX@9534     | 1.39E-11 | 2.31E-04 |
| 31Mar2011 | 2194  | 548.28  | -5.99626 | 4 R.KVDK+14 chr3@5261    | 2.83E-10 | 0.007006 |
| 31Mar2011 | 10726 | 785.42  | 22.95449 | 1 _..MPAWAF chr2@1115    | 2.29E-11 | 4.34E-04 |
| 31Mar2011 | 1089  | 562.31  | -13.4391 | 2 R.FYLLLYLK Splice@chr  | 4.73E-11 | 0.001263 |
| 31Mar2011 | 4441  | 529.6   | -12.9775 | 3 _..AFHESKL chrX@3409   | 3.76E-10 | 0.008226 |
| 31Mar2011 | 6017  | 509.3   | -20.473  | 2 R.SSVIMLIV chr2@5767   | 1.27E-10 | 0.002984 |
| 31Mar2011 | 7942  | 748.73  | -12.625  | 3 R.LPSKENL chr4@5639    | 6.15E-11 | 0.001662 |
| 31Mar2011 | 773   | 420.68  | -22.1784 | 2 R.MMTGTG chrX@9534     | 1.02E-11 | 0        |
| 31Mar2011 | 12329 | 754.1   | 20.46108 | 3 _..DLLEALD Splice@chr  | 2.79E-10 | 0.007006 |
| 31Mar2011 | 709   | 452.23  | -1.48793 | 2 R.SGEPLSA Splice@chr   | 1.13E-10 | 0.002984 |
| 31Mar2011 | 13558 | 491.64  | 23.22207 | 3 R.LLLDKPLF Splice@chr  | 1.03E-10 | 0.002825 |
| 31Mar2011 | 644   | 452.23  | -1.48793 | 2 R.SGEPLSA Splice@chr   | 2.34E-10 | 0.006154 |
| 31Mar2011 | 5649  | 1074.56 | 19.71032 | 2 M.VRKATG chr2@8197     | 2.05E-11 | 4.34E-04 |
| 31Mar2011 | 12605 | 1003.19 | 17.13413 | 3 R.CWNRRA Splice@chr    | 8.28E-13 | 0        |
| 31Mar2011 | 735   | 452.23  | -1.48793 | 2 R.SGEPLSA Splice@chr   | 1.71E-10 | 0.004105 |
| 31Mar2011 | 6122  | 509.3   | -20.473  | 2 R.SSVIMLIV chr2@5767   | 9.30E-11 | 0.002825 |
| 31Mar2011 | 5339  | 596.32  | 13.94377 | 2 K.M+15.99 chr2@1468    | 2.73E-10 | 0.007006 |
| 31Mar2011 | 3426  | 517.96  | 7.005376 | 3 K.NLK+14.C chr5@1571   | 1.01E-12 | 0        |
| 31Mar2011 | 6045  | 1017.59 | -22.5744 | 1 R.SSVIMLIV chr2@5767   | 3.68E-10 | 0.007865 |
| 31Mar2011 | 9670  | 858.48  | 6.006088 | 3 _..LETGIKPI Splice@chr | 1.44E-10 | 0.003342 |
| 31Mar2011 | 12270 | 929.98  | -17.727  | 4 R.YTM+15. chr4@1185    | 3.47E-11 | 4.34E-04 |
| 31Mar2011 | 14164 | 1147.24 | 4.705638 | 3 R.FQSAAIG Splice@chr   | 2.25E-17 | 0        |
| 31Mar2011 | 12826 | 582.65  | 15.01592 | 3 R.SIFVDLEP Splice@chr  | 7.54E-11 | 0.002055 |
| 31Mar2011 | 6068  | 509.3   | -20.473  | 2 R.SSVIMLIV chr2@5767   | 4.70E-11 | 0.001263 |
| 31Mar2011 | 13284 | 634.84  | 6.410455 | 2 R.VDIGDILF Splice@chr  | 2.87E-13 | 0        |
| 31Mar2011 | 10115 | 833.42  | -19.2103 | 2 _..IIEPYVAV Splice@chr | 8.38E-11 | 0.002446 |
| 31Mar2011 | 14566 | 1018.55 | -8.33756 | 2 K.LFPWRCI Splice@chr   | 2.19E-10 | 0.005591 |
| 31Mar2011 | 8083  | 748.73  | -12.625  | 3 R.LPSKENL chr4@5639    | 2.31E-10 | 0.005971 |
| 31Mar2011 | 8373  | 880.97  | 21.43304 | 2 A.HRK+14.C chr5@1438   | 4.29E-10 | 0.009844 |
| 31Mar2011 | 14449 | 916.98  | -20.1114 | 4 R.YEKVIIFN chr5@1391   | 3.48E-10 | 0.007508 |
| 31Mar2011 | 7393  | 844.43  | 17.99527 | 2 _..EGDGEIE Splice@chr  | 1.68E-10 | 0.003912 |
| 31Mar2011 | 2688  | 936.48  | 27.86052 | 1 K.LNGGYEC chr2@1191    | 2.55E-10 | 0.006878 |
| 31Mar2011 | 10072 | 833.42  | -19.2103 | 2 _..IIEPYVAV Splice@chr | 1.46E-10 | 0.003342 |

|           |       |         |          |                         |          |          |
|-----------|-------|---------|----------|-------------------------|----------|----------|
| 31Mar2011 | 7976  | 643.37  | -15.2409 | 3 R.VAIVCSK\ Splice@chr | 1.41E-10 | 0.003342 |
| 31Mar2011 | 11123 | 473.57  | -23.6784 | 3 R.TSFHSSL\ chr5@5498  | 2.69E-11 | 4.34E-04 |
| 31Mar2011 | 3619  | 434.24  | 13.9946  | 3 _RSNDQTI chr5@6378    | 3.79E-10 | 0.008226 |
| 31Mar2011 | 5855  | 572.63  | 9.609873 | 3 K.IVLFQLFN chr3@1294  | 5.73E-10 | 0.009151 |
| 31Mar2011 | 12551 | 962.47  | -16.0654 | 3 R.WFWGQ\ chr4@3030    | 3.96E-11 | 8.00E-04 |
| 31Mar2011 | 12763 | 1147.24 | 4.705638 | 3 R.FQSAAIG Splice@chr  | 5.33E-15 | 0        |
| 31Mar2011 | 12759 | 1147.24 | 4.705638 | 3 R.FQSAAIG Splice@chr  | 1.60E-14 | 0        |
| 31Mar2011 | 9044  | 516.3   | 4.106203 | 3 R.NIIFLMVI chrX@1294  | 3.85E-10 | 0.007781 |
| 31Mar2011 | 11838 | 783.45  | -3.51026 | 2 K.MLKK+14 chr5@1675   | 5.19E-10 | 0.008669 |
| 31Mar2011 | 6548  | 986.5   | -26.5069 | 2 K.KSKKSCA chr1@9876   | 2.12E-11 | 2.07E-04 |
| 31Mar2011 | 3712  | 493.78  | -11.3951 | 2 R.KNQENLI Splice@chr  | 5.24E-10 | 0.008669 |
| 31Mar2011 | 12042 | 634.84  | 6.410455 | 2 R.VDIGDILF Splice@chr | 1.48E-12 | 0        |
| 31Mar2011 | 3950  | 681.35  | -28.0792 | 2 R.RFQERRV chr4@1682   | 5.20E-10 | 0.008669 |
| 31Mar2011 | 9578  | 1005.47 | -16.3827 | 2 K.KVELALW Splice@chr  | 1.84E-21 | 0        |
| 31Mar2011 | 10590 | 742.88  | -6.21424 | 2 K.M+15.99 chr4@1648   | 3.35E-10 | 0.006575 |
| 31Mar2011 | 12019 | 634.84  | 6.410455 | 2 R.VDIGDILF Splice@chr | 5.65E-12 | 0        |
| 31Mar2011 | 7550  | 554.26  | 6.682444 | 2 R.M+15.99 Splice@chr  | 5.40E-10 | 0.008669 |
| 31Mar2011 | 5089  | 456.75  | -25.512  | 2 K.ITLESPR chr5@5111   | 1.25E-10 | 0.002059 |
| 31Mar2011 | 13188 | 809.02  | 4.909957 | 2 R.FTTELLLL chr3@8986  | 1.48E-10 | 0.003141 |
| 31Mar2011 | 13171 | 809.02  | 4.909957 | 2 R.FTTELLLL chr3@8986  | 4.41E-11 | 9.89E-04 |
| 31Mar2011 | 7303  | 606.86  | 28.10799 | 2 R.VLPTVFY\ chr5@1167  | 1.76E-10 | 0.003686 |
| 31Mar2011 | 1048  | 464.24  | -7.11495 | 2 K.ETSFSTK\ chr4@8236  | 2.71E-10 | 0.005036 |
| 31Mar2011 | 12694 | 962.8   | 16.16136 | 3 _CSIRPISG Splice@chr  | 3.63E-11 | 4.04E-04 |
| 31Mar2011 | 11373 | 672.58  | -19.3267 | 5 R.KVSNVQ\ chr5@8812   | 4.75E-11 | 9.89E-04 |
| 31Mar2011 | 12331 | 968.13  | 18.26018 | 3 _GCSIVPIS Splice@chr  | 4.30E-10 | 0.007911 |
| 31Mar2011 | 11272 | 1028.98 | -26.3436 | 2 R.SQMDILC chrX@1399   | 4.12E-10 | 0.007911 |
| 31Mar2011 | 9072  | 753.95  | -13.1319 | 2 K.K+14.016 chr2@1375  | 2.23E-10 | 0.004734 |
| 31Mar2011 | 5800  | 829.89  | -16.1259 | 2 R.FEVFEIEC chr4@7299  | 6.06E-10 | 0.009634 |
| 31Mar2011 | 11028 | 750.38  | -16.0136 | 2 V.SWQILFN Splice@chr  | 2.86E-10 | 0.005036 |
| 31Mar2011 | 9736  | 785.42  | 22.95449 | 1 _MPAWAF chr2@1115     | 2.29E-11 | 2.07E-04 |
| 31Mar2011 | 12013 | 730.93  | -11.0855 | 2 _FFHKVK+ chr5@2007    | 5.83E-10 | 0.009634 |
| 31Mar2011 | 9118  | 753.96  | 0.162122 | 2 K.K+14.016 chr2@1375  | 2.85E-10 | 0.005036 |
| 31Mar2011 | 4072  | 1025.61 | -11.6755 | 1 K.LGLGSGL chr5@4945   | 6.44E-12 | 0        |
| 31Mar2011 | 8748  | 762.43  | 16.40509 | 2 _MK+14.0 chr4@7749    | 4.18E-10 | 0.007911 |
| 31Mar2011 | 2594  | 936.48  | 27.86052 | 1 K.LNGGYEC chr2@1191   | 4.39E-11 | 9.89E-04 |
| 31Mar2011 | 1690  | 536.29  | -10.9462 | 2 _QVEFNPI\ Splice@chr  | 4.35E-10 | 0.007911 |
| 31Mar2011 | 7338  | 724.06  | 2.506414 | 3 R.NELEVFK chr1@1385   | 4.48E-10 | 0.008043 |
| 31Mar2011 | 8505  | 1134.05 | -14.1995 | 2 _IPSAVGY\ Splice@chr  | 3.42E-13 | 0        |
| 31Mar2011 | 1087  | 464.24  | -7.11495 | 2 K.ETSFSTK\ chr4@8236  | 4.64E-10 | 0.008043 |
| 31Mar2011 | 11178 | 754.1   | 20.46108 | 3 _DLLEALD\ Splice@chr  | 3.27E-10 | 0.006258 |
| 31Mar2011 | 12274 | 491.64  | 23.22207 | 3 R.LLLDKPLF Splice@chr | 9.12E-11 | 0.001517 |
| 31Mar2011 | 9644  | 1056.56 | 28.0642  | 3 I.SRVEDDS\ Splice@chr | 7.52E-14 | 0        |
| 31Mar2011 | 1062  | 562.31  | -13.4391 | 2 R.FYLLYLYK Splice@chr | 4.81E-11 | 9.89E-04 |
| 31Mar2011 | 9453  | 759.4   | -15.0495 | 2 K.FIDANLQ chr4@8206   | 5.61E-10 | 0.008816 |
| 31Mar2011 | 7535  | 1106.51 | -25.9146 | 1 R.M+15.99 chr5@9235   | 4.56E-10 | 0.008043 |
| 31May2011 | 9294  | 831.95  | -16.4251 | 2 K.PM+15.9 chr3@1124   | 5.24E-11 | 0.001586 |
| 31May2011 | 7781  | 664.7   | 1.197202 | 3 _PTLNK+1 chr1@6526    | 1.18E-10 | 0.004908 |

|           |       |         |          |                        |          |          |
|-----------|-------|---------|----------|------------------------|----------|----------|
| 31May2011 | 9261  | 831.95  | -16.4251 | 2 K.PM+15.9 chr3@1124  | 1.73E-10 | 0.007019 |
| 31May2011 | 10081 | 1003.18 | 7.145987 | 3 R.CWNRRA Splice@chr  | 3.33E-11 | 8.15E-04 |
| 31May2011 | 8604  | 675.33  | -24.7716 | 2 K.IEMEFLVI chrX@1244 | 1.26E-10 | 0.004908 |
| 31May2011 | 1690  | 416.56  | -17.4291 | 3 _TSRPQNF chr2@1374   | 2.17E-10 | 0.005627 |
| 31May2011 | 4299  | 850.98  | -13.2844 | 2 K.RGVRLSH chr2@2785  | 2.47E-10 | 0.005627 |
| 31May2011 | 6006  | 831.95  | -16.4251 | 2 K.PM+15.9 chr3@1124  | 3.25E-10 | 0.007905 |
| 31May2011 | 4454  | 750.38  | -22.4793 | 2 _LTGTLEGI Splice@chr | 3.96E-13 | 5.29E-04 |
| 31May2011 | 5760  | 850.97  | -25.0608 | 2 K.RGVRLSH chr2@2785  | 7.65E-11 | 5.29E-04 |
| 31May2011 | 8518  | 831.95  | -16.4251 | 2 K.PM+15.9 chr3@1124  | 5.16E-11 | 5.29E-04 |
| 31May2011 | 5931  | 850.97  | -25.0608 | 2 K.RGVRLSH chr2@2785  | 2.36E-10 | 0.004451 |
| 31May2011 | 2123  | 416.56  | -17.4291 | 3 _TSRPQNF chr2@1374   | 4.50E-11 | 5.29E-04 |
| 31May2011 | 8735  | 731.73  | 11.91669 | 3 R.ATDDWII Splice@chr | 3.26E-10 | 0.005837 |
| 31May2011 | 7286  | 490.74  | -7.60235 | 2 K.DITMEIM chr3@1481  | 2.29E-10 | 0.003497 |
| 31May2011 | 5659  | 851.48  | -15.2578 | 2 K.RGVRLSH chr2@2785  | 2.16E-10 | 0.003497 |
| 31May2011 | 2654  | 666.37  | 7.7973   | 2 K.SNGSGAI Splice@chr | 1.82E-10 | 0.003049 |
| 31May2011 | 8540  | 831.95  | -16.4251 | 2 K.PM+15.9 chr3@1124  | 2.26E-10 | 0.003497 |
| 31May2011 | 6701  | 894.5   | -14.1127 | 2 _VETGIIKP Splice@chr | 1.97E-12 | 0        |
| 31May2011 | 4046  | 750.38  | -22.4793 | 2 _LTGTLEGI Splice@chr | 1.10E-11 | 0        |
| 31May2011 | 7688  | 831.95  | -16.4251 | 2 K.PM+15.9 chr3@1124  | 1.03E-10 | 0.003807 |
| 31May2011 | 6674  | 894.5   | -14.1127 | 2 _VETGIIKP Splice@chr | 2.31E-13 | 0        |
| 31May2011 | 1888  | 416.56  | -17.4291 | 3 _TSRPQNF chr2@1374   | 1.45E-10 | 0.006143 |
| 31May2011 | 1870  | 416.56  | -17.4291 | 3 _TSRPQNF chr2@1374   | 5.07E-11 | 0.001326 |
| 31May2011 | 5109  | 851.49  | -3.4814  | 2 K.RGVRLSH chr2@2785  | 2.08E-10 | 0.006607 |
| 31May2011 | 6739  | 664.7   | 1.197202 | 3 _PTLNK+1. chr1@6526  | 5.07E-11 | 0.001009 |
| 31May2011 | 7794  | 831.95  | -16.4251 | 2 K.PM+15.9 chr3@1124  | 9.63E-11 | 0.001974 |
| 31May2011 | 6551  | 664.7   | 1.197202 | 3 _PTLNK+1. chr1@6526  | 2.75E-11 | 0.001009 |
| 31May2011 | 5668  | 1127.04 | -16.1316 | 2 _IPSAVGY Splice@chr  | 1.30E-12 | 0        |
| 31May2011 | 6584  | 664.7   | 1.197202 | 3 _PTLNK+1. chr1@6526  | 1.87E-11 | 0        |
| 31May2011 | 6701  | 894.5   | -14.1127 | 2 _VETGIIKP Splice@chr | 4.87E-13 | 0        |
| 31May2011 | 3050  | 1025.61 | -11.6755 | 1 K.LGLGSGL chr5@4945  | 8.15E-12 | 0        |
| 31May2011 | 6618  | 664.7   | 1.197202 | 3 _PTLNK+1. chr1@6526  | 1.49E-11 | 0        |
| 31May2011 | 7774  | 831.95  | -16.4251 | 2 K.PM+15.9 chr3@1124  | 3.36E-10 | 0.009923 |
| 31May2011 | 3093  | 871.43  | -27.7267 | 1 R.LPVPECR chrX@1092  | 3.00E-10 | 0.008838 |
| 31May2011 | 5683  | 505.61  | -17.7907 | 3 _YINIVVIG Splice@chr | 4.01E-13 | 0        |
| 31May2011 | 8743  | 1142.59 | 12.00935 | 2 R.TSM+15. chrX@1556  | 4.29E-10 | 0.009588 |
| 31May2011 | 10529 | 973.52  | 13.28193 | 2 K.LIFENEQI chr2@8808 | 4.38E-10 | 0.009588 |
| 31May2011 | 3836  | 1025.61 | -11.6755 | 1 K.LGLGSGL chr5@4945  | 6.49E-12 | 0        |
| 31May2011 | 5521  | 897.42  | -27.6753 | 3 _QVREMH Splice@chr   | 5.59E-11 | 3.59E-04 |
| 31May2011 | 10061 | 557.06  | -8.53706 | 4 K.EVMLRPC chrX@1653  | 1.11E-10 | 0.002078 |
| 31May2011 | 10476 | 1003.19 | 17.13413 | 3 R.CWNRRA Splice@chr  | 2.68E-10 | 0.004266 |
| 31May2011 | 5723  | 505.61  | -17.7907 | 3 _YINIVVIG Splice@chr | 2.11E-12 | 0        |
| 31May2011 | 5894  | 505.28  | -8.95659 | 3 _YINIVVIG Splice@chr | 1.13E-13 | 0        |
| 31May2011 | 11290 | 911.42  | 20.49399 | 2 _PRM+15. Splice@chr  | 2.55E-10 | 0.004266 |
| 31May2011 | 3198  | 693.87  | -6.6949  | 2 V.ICVAVGD chr5@1063  | 2.26E-10 | 0.00365  |
| 31May2011 | 5198  | 506.58  | 20.92609 | 3 _DWHHTF Splice@chr   | 1.70E-10 | 0.003013 |
| 31May2011 | 8085  | 664.7   | 1.197202 | 3 _PTLNK+1. chr1@6526  | 6.11E-12 | 0        |
| 31May2011 | 8695  | 647.32  | -23.514  | 2 K.NCLKNFE chr4@1026  | 2.21E-10 | 0.00365  |

|           |       |         |          |                        |          |          |
|-----------|-------|---------|----------|------------------------|----------|----------|
| 31May2011 | 5804  | 505.28  | -8.95659 | 3 _YINIVVIG Splice@chr | 1.43E-14 | 0        |
| 31May2011 | 8199  | 664.7   | 1.197202 | 3 _PTLNK+1 chr1@6526   | 4.42E-11 | 3.59E-04 |
| 31May2011 | 8046  | 664.7   | 1.197202 | 3 _PTLNK+1 chr1@6526   | 3.57E-10 | 0.00777  |
| 31May2011 | 6655  | 671.37  | -24.0361 | 2 T.FNIVHTQ Splice@chr | 1.72E-10 | 0.003013 |
| 31May2011 | 8008  | 664.36  | -7.23808 | 3 _PTLNK+1 chr1@6526   | 1.18E-10 | 0.002752 |
| 31May2011 | 7978  | 664.7   | 1.197202 | 3 _PTLNK+1 chr1@6526   | 1.54E-11 | 0        |
| 31May2011 | 10033 | 557.06  | -8.53706 | 4 K.EVMLRPC chrX@1653  | 4.76E-11 | 3.59E-04 |
| 31May2011 | 5849  | 505.28  | -8.95659 | 3 _YINIVVIG Splice@chr | 1.46E-14 | 0        |
| 31May2011 | 7745  | 893.99  | -23.4434 | 2 _VETGIIKP Splice@chr | 1.50E-11 | 4.20E-04 |
| 31May2011 | 9781  | 1003.19 | 17.13413 | 3 R.CWNRRRA Splice@chr | 6.04E-12 | 0        |
| 31May2011 | 7643  | 664.7   | 1.197202 | 3 _PTLNK+1 chr1@6526   | 3.17E-11 | 0.001176 |
| 31May2011 | 10829 | 582.29  | -17.4036 | 3 R.VKSEHQI chr4@1532  | 2.79E-10 | 0.004269 |
| 31May2011 | 6376  | 671.37  | -24.0361 | 2 T.FNIVHTQ Splice@chr | 2.87E-10 | 0.004269 |
| 31May2011 | 6335  | 671.37  | -24.0361 | 2 T.FNIVHTQ Splice@chr | 4.55E-10 | 0.008008 |
| 31May2011 | 1769  | 795.48  | -0.38412 | 1 K.LMLPPPK Splice@chr | 5.35E-10 | 0.009625 |
| 31May2011 | 5471  | 505.61  | -17.7907 | 3 _YINIVVIG Splice@chr | 6.58E-12 | 0        |
| 31May2011 | 7497  | 1118.04 | -25.2263 | 2 L.LHHHRVL Splice@chr | 5.25E-10 | 0.009625 |
| 31May2011 | 6521  | 625.32  | -27.4566 | 4 R.M+15.99 chrX@6806  | 4.45E-10 | 0.008008 |
| 31May2011 | 7709  | 664.7   | 1.197202 | 3 _PTLNK+1 chr1@6526   | 1.43E-10 | 0.002579 |
| 31May2011 | 8275  | 647.32  | -23.514  | 2 K.NCLKNFE chr4@1026  | 3.30E-11 | 0.001176 |
| 31May2011 | 5580  | 505.28  | -8.95659 | 3 _YINIVVIG Splice@chr | 3.29E-14 | 0        |
| 31May2011 | 7823  | 664.7   | 1.197202 | 3 _PTLNK+1 chr1@6526   | 1.71E-11 | 4.20E-04 |
| 31May2011 | 7674  | 664.7   | 1.197202 | 3 _PTLNK+1 chr1@6526   | 4.89E-12 | 0        |
| 31May2011 | 7609  | 664.7   | 1.197202 | 3 _PTLNK+1 chr1@6526   | 1.07E-10 | 0.002254 |
| 31May2011 | 1782  | 795.48  | -0.38412 | 1 K.LMLPPPK Splice@chr | 5.31E-10 | 0.009625 |
| 31May2011 | 5539  | 505.28  | -8.95659 | 3 _YINIVVIG Splice@chr | 1.12E-12 | 0        |
| 31May2011 | 3611  | 505.28  | -8.95659 | 3 _YINIVVIG Splice@chr | 4.74E-14 | 0        |
| 31May2011 | 4801  | 910.98  | -13.9241 | 2 _RMVVTF/ Splice@chr  | 6.80E-11 | 0.001304 |
| 31May2011 | 5450  | 664.7   | 1.197202 | 3 _PTLNK+1 chr1@6526   | 5.08E-11 | 6.78E-04 |
| 31May2011 | 3923  | 472.29  | -0.64754 | 2 _SPLFVPKI chrX@4402  | 1.87E-10 | 0.006188 |
| 31May2011 | 3714  | 505.28  | -8.95659 | 3 _YINIVVIG Splice@chr | 6.91E-14 | 0        |
| 31May2011 | 5656  | 664.7   | 1.197202 | 3 _PTLNK+1 chr1@6526   | 1.58E-11 | 0        |
| 31May2011 | 1241  | 416.56  | -17.4291 | 3 _TSRPQNF chr2@1374   | 1.39E-10 | 0.003795 |
| 31May2011 | 1230  | 416.56  | -17.4291 | 3 _TSRPQNF chr2@1374   | 1.60E-10 | 0.004991 |
| 31May2011 | 5481  | 664.7   | 1.197202 | 3 _PTLNK+1 chr1@6526   | 3.36E-12 | 0        |
| 31May2011 | 3750  | 505.28  | -8.95659 | 3 _YINIVVIG Splice@chr | 7.61E-12 | 0        |
| 31May2011 | 3682  | 505.28  | -8.95659 | 3 _YINIVVIG Splice@chr | 1.60E-13 | 0        |
| 31May2011 | 5516  | 664.7   | 1.197202 | 3 _PTLNK+1 chr1@6526   | 1.38E-11 | 0        |
| 31May2011 | 5544  | 664.7   | 1.197202 | 3 _PTLNK+1 chr1@6526   | 4.46E-11 | 6.78E-04 |
| 31May2011 | 5629  | 664.7   | 1.197202 | 3 _PTLNK+1 chr1@6526   | 4.02E-11 | 6.78E-04 |
| 31May2011 | 5634  | 894.5   | -14.1127 | 2 _VETGIIKP Splice@chr | 9.87E-13 | 0        |
| 31May2011 | 1267  | 456.25  | -12.692  | 3 R.IKK+14.0 chr4@7168 | 8.70E-11 | 0.003098 |
| 31May2011 | 3421  | 505.28  | -8.95659 | 3 _YINIVVIG Splice@chr | 2.82E-13 | 0        |
| 31May2011 | 1071  | 416.56  | -17.4291 | 3 _TSRPQNF chr2@1374   | 1.46E-10 | 0.004498 |
| 31May2011 | 4958  | 664.7   | 1.197202 | 3 _PTLNK+1 chr1@6526   | 1.40E-11 | 0        |
| 31May2011 | 1855  | 493.78  | -11.3951 | 2 R.KNQENLI Splice@chr | 2.72E-10 | 0.007959 |
| 31May2011 | 5082  | 664.7   | 1.197202 | 3 _PTLNK+1 chr1@6526   | 1.86E-11 | 0        |

|           |       |         |          |                         |          |          |
|-----------|-------|---------|----------|-------------------------|----------|----------|
| 31May2011 | 3387  | 505.28  | -8.95659 | 3 _YINIVVIG Splice@chr  | 1.76E-14 | 0        |
| 31May2011 | 5091  | 894     | -12.2343 | 2 _VETGIKP Splice@chr   | 5.41E-13 | 0        |
| 31May2011 | 5105  | 664.7   | 1.197202 | 3 _PTLNK+1. chr1@6526   | 4.02E-11 | 0        |
| 31May2011 | 3611  | 472.29  | -0.64754 | 2 _SPLFVPKI chrX@4402   | 1.32E-10 | 0.004498 |
| 31May2011 | 4988  | 664.7   | 1.197202 | 3 _PTLNK+1. chr1@6526   | 1.68E-10 | 0.005878 |
| 31May2011 | 6749  | 968.17  | 20.56027 | 3 R.ENLNCFK chr4@9175   | 2.27E-10 | 0.008006 |
| 31May2011 | 5357  | 1118.04 | -25.2263 | 2 L.LHHHRVL Splice@chr  | 9.07E-11 | 0.002294 |
| 31May2011 | 6686  | 732.07  | 19.51873 | 3 R.ATDDWII Splice@chr  | 2.81E-10 | 0.009943 |
| 31May2011 | 5276  | 429.25  | -19.383  | 3 R.VVTKNG/ chr5@1641   | 1.76E-11 | 5.45E-04 |
| 31May2011 | 6683  | 505.28  | -8.95659 | 3 _YINIVVIG Splice@chr  | 6.79E-14 | 0        |
| 31May2011 | 13005 | 634.83  | -9.39461 | 2 R.VDIGDILF Splice@chr | 2.43E-11 | 0.001074 |
| 31May2011 | 6556  | 505.27  | -28.8063 | 3 _YINIVVIG Splice@chr  | 2.30E-13 | 0        |
| 31May2011 | 13149 | 735.82  | -22.5924 | 2 K.FAETNAK chr5@1229   | 1.21E-10 | 0.004829 |
| 31May2011 | 9168  | 490.74  | -7.60235 | 2 K.DITMEIM chr3@1481   | 1.78E-10 | 0.006123 |
| 31May2011 | 10555 | 473.57  | -23.6784 | 3 R.TSFHSSL5 chr5@5498  | 1.87E-10 | 0.006123 |
| 31May2011 | 9440  | 893.99  | -23.4434 | 2 _VETGIKP Splice@chr   | 1.99E-12 | 0        |
| 31May2011 | 5012  | 975.55  | -13.0268 | 1 K.LPKLDAYI chr4@1149  | 1.69E-10 | 0.005717 |
| 31May2011 | 10374 | 675.33  | -24.7716 | 2 K.IEMEFLVI chrX@1242  | 1.32E-10 | 0.004829 |
| 31May2011 | 13300 | 724.92  | 11.51831 | 2 G.LSSNSSIE chr1@1482  | 2.61E-10 | 0.007863 |
| 31May2011 | 5054  | 975.55  | -13.0268 | 1 K.LPKLDAYI chr4@1149  | 1.40E-10 | 0.005054 |
| 31May2011 | 12383 | 1003.18 | 7.145987 | 3 R.CWNRRA Splice@chr   | 1.08E-10 | 0.004407 |
| 31May2011 | 4846  | 581.95  | -26.8252 | 3 R.VKSEHQI chr4@1532   | 6.47E-10 | 0.007792 |
| 31May2011 | 1435  | 505.28  | -8.95659 | 3 _YINIVVIG Splice@chr  | 2.13E-13 | 0        |
| 31May2011 | 3651  | 931.53  | 0.362106 | 2 R.CTLLYISQ chr4@2818  | 8.31E-11 | 0.00134  |
| 31May2011 | 3165  | 468.91  | -17.4792 | 3 K.TSRNAFK chr1@3696   | 2.80E-10 | 0.00134  |
| 31May2011 | 10715 | 843.97  | -18.0019 | 2 R.RVPVISF\ Splice@chr | 2.25E-15 | 0        |
| 31May2011 | 11193 | 831.95  | -16.4251 | 2 K.PM+15.9 chr3@1122   | 1.56E-10 | 0.003266 |
| 31May2011 | 7561  | 554.26  | 6.682444 | 2 R.M+15.99 Splice@chr  | 2.26E-10 | 0.005133 |
| 31May2011 | 7512  | 554.26  | 6.682444 | 2 R.M+15.99 Splice@chr  | 1.19E-10 | 0.002705 |
| 31May2011 | 6588  | 505.27  | -28.8063 | 3 _YINIVVIG Splice@chr  | 8.58E-12 | 0        |
| 31May2011 | 12023 | 565.31  | -1.65846 | 3 K.IGVGAPD chr5@2575   | 8.94E-11 | 0.002168 |
| 31May2011 | 9482  | 664.7   | 1.197202 | 3 _PTLNK+1. chr1@6526   | 3.20E-10 | 0.008894 |
| 31May2011 | 12618 | 634.83  | -9.39461 | 2 R.VDIGDILF Splice@chr | 3.59E-11 | 6.52E-04 |
| 31May2011 | 6633  | 505.27  | -28.8063 | 3 _YINIVVIG Splice@chr  | 1.42E-13 | 0        |
| 31May2011 | 3582  | 693.87  | -6.6949  | 2 V.ICVAVGD chr5@1063   | 2.60E-10 | 0.006227 |
| 31May2011 | 6798  | 518.58  | -20.3615 | 3 _FVVDGSS chr5@1240    | 3.47E-10 | 0.009858 |
| 31May2011 | 6849  | 518.58  | -20.3615 | 3 _FVVDGSS chr5@1240    | 1.48E-11 | 3.38E-04 |
| 31May2011 | 12763 | 735.83  | -8.97052 | 2 K.FAETNAK chr5@1229   | 2.63E-11 | 3.38E-04 |
| 31May2011 | 9708  | 782.38  | -21.3243 | 2 R.EHRWRSI Splice@chr  | 1.89E-10 | 0.00409  |
| 31May2011 | 12741 | 735.83  | -8.97052 | 2 K.FAETNAK chr5@1229   | 1.89E-10 | 0.00409  |
| 31May2011 | 1036  | 405.21  | -4.37903 | 2 R.IEHADPK chr4@6332   | 9.20E-11 | 0.002168 |
| 31May2011 | 6683  | 505.28  | -8.95659 | 3 _YINIVVIG Splice@chr  | 2.42E-13 | 0        |
| 31May2011 | 5729  | 750.38  | -22.4793 | 2 _LTGTLEGI Splice@chr  | 5.42E-12 | 0        |
| 31May2011 | 9692  | 894.49  | -25.3218 | 2 _VETGIKP Splice@chr   | 4.46E-13 | 0        |
| 31May2011 | 10569 | 946.01  | -17.7372 | 2 I.FDK+14.0 Splice@chr | 3.27E-10 | 0.009139 |
| 31May2011 | 6489  | 505.28  | -8.95659 | 3 _YINIVVIG Splice@chr  | 1.35E-13 | 0        |
| 31May2011 | 6536  | 505.61  | -17.7907 | 3 _YINIVVIG Splice@chr  | 4.84E-13 | 0        |

|           |       |         |          |                         |          |          |
|-----------|-------|---------|----------|-------------------------|----------|----------|
| 31May2011 | 4180  | 505.28  | -8.95659 | 3 _YINIVVIG Splice@chr  | 7.66E-13 | 0        |
| 31May2011 | 6274  | 894     | -12.2343 | 2 _VETGIKP Splice@chr   | 1.13E-12 | 0        |
| 31May2011 | 2697  | 1025.62 | -1.90621 | 1 K.LGLGSL chr5@4945    | 3.81E-11 | 0        |
| 31May2011 | 6329  | 894     | -12.2343 | 2 _VETGIKP Splice@chr   | 8.17E-12 | 0        |
| 31May2011 | 1565  | 416.56  | -17.4291 | 3 _TSRPQNF chr2@1374    | 1.99E-10 | 0.003861 |
| 31May2011 | 6300  | 894     | -12.2343 | 2 _VETGIKP Splice@chr   | 8.65E-13 | 0        |
| 31May2011 | 7166  | 831.96  | -4.37173 | 2 K.PM+15.9 chr3@1124   | 1.09E-10 | 0.001731 |
| 31May2011 | 4611  | 661.4   | -2.4954  | 2 K.LVLIAVN1 chr1@6528  | 2.31E-10 | 0.005946 |
| 31May2011 | 3760  | 750.38  | -22.4793 | 2 _LTGTLEGI Splice@chr  | 4.58E-12 | 0        |
| 31May2011 | 4322  | 505.28  | -8.95659 | 3 _YINIVVIG Splice@chr  | 8.97E-14 | 0        |
| 31May2011 | 4286  | 505.28  | -8.95659 | 3 _YINIVVIG Splice@chr  | 1.70E-13 | 0        |
| 31May2011 | 13803 | 506.58  | 20.92609 | 3 _DWHHTF Splice@chr    | 8.70E-11 | 0.003288 |
| 31May2011 | 9743  | 1051.88 | 25.1969  | 3 R.TTGVLVD Splice@chr  | 2.08E-11 | 3.14E-04 |
| 31May2011 | 7394  | 850.97  | -25.0608 | 2 K.RGVRLSH chr2@2785   | 1.37E-10 | 0.004297 |
| 31May2011 | 9137  | 894     | -12.2343 | 2 _VETGIKP Splice@chr   | 2.02E-13 | 0        |
| 31May2011 | 3598  | 600.41  | 20.1621  | 2 K.KVILKNPF chr1@3022  | 2.11E-10 | 0.005058 |
| 31May2011 | 10763 | 831.95  | -16.4251 | 2 K.PM+15.9 chr3@1124   | 1.55E-10 | 0.004297 |
| 31May2011 | 11684 | 1003.18 | 7.145987 | 3 R.CWNRRA Splice@chr   | 1.92E-12 | 0        |
| 31May2011 | 7454  | 671.87  | -26.5383 | 2 T.FNIVHTQ Splice@chr  | 1.23E-10 | 0.0041   |
| 31May2011 | 11711 | 1003.18 | 7.145987 | 3 R.CWNRRA Splice@chr   | 2.49E-11 | 3.14E-04 |
| 31May2011 | 13151 | 1049.03 | 14.94656 | 2 F.QFFHEIQI chrX@1929  | 2.26E-10 | 0.005058 |
| 31May2011 | 4284  | 1025.61 | -11.6755 | 1 K.LGLGSL chr5@4945    | 6.74E-11 | 0.001513 |
| 31May2011 | 9332  | 1118.04 | -25.2263 | 2 L.LHHHRVL Splice@chr  | 3.73E-11 | 3.14E-04 |
| 31May2011 | 4990  | 975.55  | -13.0268 | 1 K.LPKLDAYI chr4@1149  | 5.92E-11 | 9.18E-04 |
| 31May2011 | 3563  | 693.87  | -6.6949  | 2 V.ICVAVGD chr5@1065   | 3.36E-10 | 0.008753 |
| 31May2011 | 7200  | 850.97  | -25.0608 | 2 K.RGVRLSH chr2@2785   | 1.91E-10 | 0.005058 |
| 31May2011 | 3627  | 600.41  | 20.1621  | 2 K.KVILKNPF chr1@3022  | 2.33E-11 | 3.14E-04 |
| 31May2011 | 12320 | 736.33  | -11.2532 | 2 K.FAETNAK chr5@1229   | 7.36E-11 | 0.001804 |
| 31May2011 | 12341 | 736.33  | -11.2532 | 2 K.FAETNAK chr5@1229   | 1.83E-10 | 0.005058 |
| 31May2011 | 8913  | 831.95  | -16.4251 | 2 K.PM+15.9 chr3@1124   | 4.44E-11 | 4.33E-04 |
| 31May2011 | 9203  | 732.07  | 19.51873 | 3 R.ATDDWII Splice@chr  | 5.26E-11 | 8.65E-04 |
| 31May2011 | 6424  | 625.32  | -27.4566 | 4 R.M+15.99 chrX@6806   | 1.63E-10 | 0.004421 |
| 31May2011 | 8352  | 675.33  | -24.7716 | 2 K.IEMEFLVI chrX@1244  | 1.81E-10 | 0.004766 |
| 31May2011 | 8880  | 831.95  | -16.4251 | 2 K.PM+15.9 chr3@1124   | 9.10E-11 | 0.00205  |
| 31May2011 | 6255  | 850.97  | -25.0608 | 2 K.RGVRLSH chr2@2785   | 2.07E-10 | 0.00513  |
| 31May2011 | 8315  | 675.33  | -24.7716 | 2 K.IEMEFLVI chrX@1244  | 1.78E-10 | 0.004766 |
| 31May2011 | 5721  | 1029.05 | -18.2639 | 2 R.ICKNSYP\ Splice@chr | 1.03E-10 | 0.00205  |
| 31May2011 | 9504  | 889.44  | -29.2653 | 2 K.RSSVHTE chr2@8442   | 2.78E-10 | 0.008511 |
| 31May2011 | 4760  | 750.38  | -22.4793 | 2 _LTGTLEGI Splice@chr  | 3.99E-12 | 0        |
| 31May2011 | 5773  | 472.29  | -0.64754 | 2 _SPLFVPKF chrX@4402   | 2.66E-10 | 0.008174 |
| 31May2011 | 7577  | 831.95  | -16.4251 | 2 K.PM+15.9 chr3@1124   | 1.70E-10 | 0.005444 |
| 31May2011 | 7241  | 843.48  | -4.1295  | 2 R.RVPVISF\ Splice@chr | 1.05E-12 | 0        |
| 31May2011 | 4504  | 505.28  | -8.95659 | 3 _YINIVVIG Splice@chr  | 1.45E-13 | 0        |
| 31May2011 | 1668  | 416.56  | -17.4291 | 3 _TSRPQNF chr2@1374    | 1.08E-10 | 0.005128 |
| 31May2011 | 3662  | 448.23  | -21.9944 | 2 R.FGISATN\ Splice@chr | 2.02E-11 | 6.38E-04 |
| 31May2011 | 4771  | 472.29  | -0.64754 | 2 _SPLFVPKF chrX@4402   | 5.34E-10 | 0.009664 |
| 31May2011 | 5430  | 850.98  | -13.2844 | 2 K.RGVRLSH chr2@2785   | 5.14E-10 | 0.009664 |

|           |      |         |          |                         |          |          |
|-----------|------|---------|----------|-------------------------|----------|----------|
| 31May2011 | 3274 | 745.36  | -8.93767 | 1 R.SSPMAPF chr4@1045   | 2.48E-10 | 0.005978 |
| 31May2011 | 8160 | 814.48  | -17.1534 | 2 K.RTILQLNF chr5@4352  | 4.77E-10 | 0.009188 |
| 31May2011 | 4261 | 505.28  | -8.95659 | 3 _YINIVVIG Splice@chr  | 2.22E-13 | 0        |
| 31May2011 | 5054 | 850.98  | -13.2844 | 2 K.RGVRLSH chr2@2785   | 2.32E-10 | 0.008528 |
| 31May2011 | 7095 | 831.95  | -16.4251 | 2 K.PM+15.9 chr3@1124   | 7.06E-11 | 0.001834 |
| 31May2011 | 5101 | 608.84  | 15.16282 | 2 R.KTEEKLES chr2@3945  | 2.83E-10 | 0.009513 |
| 31May2011 | 6804 | 843.48  | -4.1295  | 2 R.RVPVISF\ Splice@chr | 9.83E-14 | 0        |
| 31May2011 | 3778 | 750.38  | -22.4793 | 2 _LTGTLEGI Splice@chr  | 7.73E-12 | 0        |
| 31May2011 | 2101 | 544.26  | -21.9825 | 2 K.M+15.99 chrX@1550   | 3.40E-10 | 0.007933 |
| 31May2011 | 5347 | 850.98  | -13.2844 | 2 K.RGVRLSH chr2@2785   | 4.26E-10 | 0.008408 |
| 31May2011 | 1741 | 543.77  | -0.44981 | 2 K.M+15.99 chrX@1550   | 1.64E-10 | 0.003653 |
| 31May2011 | 2859 | 475.76  | 18.38472 | 2 R.VGIADNF chr5@9964   | 2.34E-10 | 0.005112 |
| 31May2011 | 5209 | 850.97  | -25.0608 | 2 K.RGVRLSH chr2@2785   | 3.14E-11 | 5.66E-04 |
| 31May2011 | 2106 | 416.56  | -17.4291 | 3 _TSRPQNF chr2@1374    | 4.67E-11 | 5.66E-04 |
| 31May2011 | 2539 | 544.26  | -21.9825 | 2 K.M+15.99 chrX@1550   | 5.27E-12 | 0        |
| 31May2011 | 8013 | 819.1   | -3.35779 | 3 R.ITSSSVKN chr2@6680  | 1.88E-10 | 0.003653 |
| 31May2011 | 2397 | 456.25  | -12.692  | 3 R.IKK+14.0 chr4@7168  | 3.89E-10 | 0.007933 |
| 31May2011 | 2888 | 475.76  | 18.38472 | 2 R.VGIADNF chr5@9964   | 1.67E-10 | 0.003653 |
| 31May2011 | 7590 | 831.95  | -16.4251 | 2 K.PM+15.9 chr3@1124   | 4.41E-10 | 0.008854 |
| 31May2011 | 2979 | 443.28  | 0.138004 | 2 R.GDAKIIIR chr4@5608  | 2.06E-10 | 0.005112 |
| 31May2011 | 6606 | 731.74  | 25.61531 | 3 R.ATDDWII Splice@chr  | 5.86E-11 | 0        |
| 31May2011 | 1855 | 456.25  | -12.692  | 3 R.IKK+14.0 chr4@7168  | 2.72E-10 | 0.008317 |
| 31May2011 | 2268 | 475.76  | 18.38472 | 2 R.VGIADNF chr5@9964   | 5.28E-11 | 0        |
| 31May2011 | 7947 | 581.95  | -26.8252 | 3 R.VKSEHQ\ chr4@1532   | 1.85E-10 | 0.004654 |
| 31May2011 | 1583 | 416.56  | -17.4291 | 3 _TSRPQNF chr2@1374    | 4.49E-11 | 0        |
| 31May2011 | 2289 | 475.76  | 18.38472 | 2 R.VGIADNF chr5@9964   | 2.32E-10 | 0.007818 |
| 31May2011 | 6582 | 732.07  | 19.51873 | 3 R.ATDDWII Splice@chr  | 1.24E-10 | 0.004016 |
| 31May2011 | 1577 | 544.26  | -21.9825 | 2 K.M+15.99 chrX@1550   | 3.62E-11 | 0        |
| 31May2011 | 1377 | 543.77  | -0.44981 | 2 K.M+15.99 chrX@1550   | 1.30E-11 | 0        |
| 31May2011 | 1961 | 544.26  | -21.9825 | 2 K.M+15.99 chrX@1550   | 3.13E-11 | 0        |
| 31May2011 | 1565 | 544.26  | -21.9825 | 2 K.M+15.99 chrX@1550   | 2.02E-10 | 0.005937 |
| 31May2011 | 1365 | 543.77  | -0.44981 | 2 K.M+15.99 chrX@1550   | 2.91E-11 | 0        |
| 31May2011 | 2973 | 429.25  | -19.383  | 3 R.VVTKNG\ chr5@1641   | 1.33E-10 | 0.003709 |
| 31May2011 | 5286 | 664.69  | -13.8924 | 3 _PTLNK+1. chr1@6526   | 4.36E-11 | 0.001549 |
| 31May2011 | 7021 | 861.94  | -12.1641 | 2 E.YVTRYK+ chr5@1345   | 2.66E-10 | 0.00788  |
| 31May2011 | 5776 | 1056.56 | 28.0642  | 3 I.SRVEDDS\ Splice@chr | 1.03E-12 | 8.30E-04 |
| 31May2011 | 5364 | 893.99  | -23.4434 | 2 _VETGIKP Splice@chr   | 1.98E-12 | 8.30E-04 |
| 31May2011 | 5311 | 664.69  | -13.8924 | 3 _PTLNK+1. chr1@6526   | 5.57E-11 | 0.001549 |
| 31May2011 | 5924 | 473.57  | -23.6784 | 3 R.TSFHSSL\ chr5@5498  | 1.85E-11 | 8.30E-04 |
| 31May2011 | 3851 | 599.33  | -22.3738 | 3 _INKFLIFK- chr4@1511  | 6.28E-11 | 0.001549 |
| 31May2011 | 2441 | 1025.61 | -11.6755 | 1 K.LGLGSGL chr5@4945   | 5.39E-12 | 8.30E-04 |
| 31May2011 | 1709 | 936.47  | 17.15999 | 1 K.LNGGYEC chr2@1191   | 3.51E-11 | 0.001549 |
| 31May2011 | 2288 | 1025.62 | -1.90621 | 1 K.LGLGSGL chr5@4945   | 1.02E-10 | 0.003883 |
| 31May2011 | 1963 | 795.48  | -0.38412 | 1 K.LMLPPPK Splice@chr  | 3.53E-10 | 0.007026 |
| 31May2011 | 9670 | 831.95  | -16.4251 | 2 K.PM+15.9 chr3@1124   | 8.01E-11 | 0.001846 |
| 31May2011 | 6320 | 518.59  | -1.022   | 3 _FVVDGSS chr5@1240    | 1.27E-10 | 0.003582 |
| 31May2011 | 8328 | 894     | -12.2343 | 2 _VETGIKP Splice@chr   | 6.59E-13 | 0        |

|           |       |         |          |                         |          |          |
|-----------|-------|---------|----------|-------------------------|----------|----------|
| 31May2011 | 8367  | 894     | -12.2343 | 2 _VETGIIKP Splice@chr  | 9.80E-14 | 0        |
| 31May2011 | 8996  | 647.32  | -23.514  | 2 K.NCLKNFE chr4@1026   | 2.63E-10 | 0.00477  |
| 31May2011 | 6119  | 505.28  | -8.95659 | 3 _YINIVVIG Splice@chr  | 2.71E-14 | 0        |
| 31May2011 | 7056  | 620.82  | -12.0136 | 2 K.SRTYLLM chr2@1402   | 3.70E-10 | 0.007026 |
| 31May2011 | 6450  | 787.72  | -8.76957 | 3 _VRQHCSF Splice@chr   | 3.61E-10 | 0.007026 |
| 31May2011 | 6702  | 841.47  | -28.1035 | 1 K.NPVVVW chr4@4552    | 8.68E-11 | 0.001846 |
| 31May2011 | 8241  | 664.7   | 1.197202 | 3 _PTLNK+1. chr1@6526   | 1.11E-10 | 0.002904 |
| 31May2011 | 8477  | 664.7   | 1.197202 | 3 _PTLNK+1. chr1@6526   | 6.59E-11 | 0.001491 |
| 31May2011 | 8318  | 664.7   | 1.197202 | 3 _PTLNK+1. chr1@6526   | 1.11E-11 | 4.20E-04 |
| 31May2011 | 6361  | 472.29  | -0.64754 | 2 _SPLFVPKf chrX@4402   | 1.35E-10 | 0.003845 |
| 31May2011 | 8988  | 1056.56 | 28.0642  | 3 I.SRVEDDSf Splice@chr | 6.94E-14 | 0        |
| 31May2011 | 10404 | 1003.18 | 7.145987 | 3 R.CWNRRA Splice@chr   | 9.33E-12 | 4.20E-04 |
| 31May2011 | 9701  | 831.95  | -16.4251 | 2 K.PM+15.9 chr3@1124   | 2.64E-10 | 0.00477  |
| 31May2011 | 7062  | 625.32  | -27.4566 | 4 R.M+15.99 chrX@6806   | 2.09E-10 | 0.004478 |
| 31May2011 | 6075  | 505.28  | -8.95659 | 3 _YINIVVIG Splice@chr  | 6.58E-14 | 0        |
| 31May2011 | 8278  | 664.7   | 1.197202 | 3 _PTLNK+1. chr1@6526   | 3.47E-12 | 4.20E-04 |
| 31May2011 | 8008  | 664.7   | 1.197202 | 3 _PTLNK+1. chr1@6526   | 1.95E-10 | 0.004165 |
| 31May2011 | 8255  | 664.7   | 1.197202 | 3 _PTLNK+1. chr1@6526   | 1.12E-10 | 0.004165 |
| 31May2011 | 10170 | 973.52  | 13.28193 | 2 K.LIFENEQI chr2@8808  | 1.94E-10 | 0.004165 |
| 31May2011 | 1858  | 795.48  | -0.38412 | 1 K.LMLPPPK Splice@chr  | 5.17E-10 | 0.009688 |
| 31May2011 | 8172  | 894     | -12.2343 | 2 _VETGIIKP Splice@chr  | 6.53E-13 | 0        |
| 31May2011 | 8942  | 786.92  | -5.01098 | 2 _VK+14.01 chrX@1664   | 1.49E-10 | 0.004165 |
| 31May2011 | 6516  | 841.47  | -28.1035 | 1 K.NPVVVW chr4@4552    | 8.68E-11 | 0.004165 |
| 31May2011 | 8133  | 894     | -12.2343 | 2 _VETGIIKP Splice@chr  | 2.54E-11 | 0        |
| 31May2011 | 3990  | 1025.62 | -1.90621 | 1 K.LGLGSGL chr5@4945   | 1.49E-11 | 0        |
| 31May2011 | 8043  | 664.7   | 1.197202 | 3 _PTLNK+1. chr1@6526   | 1.32E-10 | 0.004165 |
| 31May2011 | 8641  | 647.32  | -23.514  | 2 K.NCLKNFE chr4@1026   | 4.15E-10 | 0.008397 |
| 31May2011 | 10630 | 975.81  | -5.15613 | 3 K.SGTIFDNI Splice@chr | 1.46E-10 | 0.004165 |
| 31May2011 | 9319  | 831.95  | -16.4251 | 2 K.PM+15.9 chr3@1124   | 2.04E-10 | 0.004165 |
| 31May2011 | 7207  | 831.95  | -16.4251 | 2 K.PM+15.9 chr3@1124   | 2.80E-10 | 0.009346 |
| 31May2011 | 4942  | 753.88  | -11.6739 | 2 K.ESKDQM chr2@1186    | 2.80E-11 | 0        |
| 31May2011 | 1254  | 416.56  | -17.4291 | 3 _TSRPQNF chr2@1374    | 2.00E-10 | 0.00448  |
| 31May2011 | 5524  | 831.95  | -16.4251 | 2 K.PM+15.9 chr3@1124   | 1.56E-10 | 0.00448  |
| 31May2011 | 2419  | 443.28  | 0.138004 | 2 R.GDAKIIIR chr4@5608  | 2.04E-10 | 7.79E-04 |
| 31May2011 | 5027  | 664.7   | 1.197202 | 3 _PTLNK+1. chr1@6526   | 2.44E-11 | 0        |
| 31May2011 | 3971  | 850.97  | -25.0608 | 2 K.RGVRLSH chr2@2785   | 9.82E-11 | 0        |
| 31May2011 | 5380  | 1110.04 | -27.8308 | 2 L.LHHHRVL Splice@chr  | 6.02E-10 | 0.00968  |
| 31May2011 | 6678  | 975.8   | -15.4281 | 3 K.SGTIFDNI Splice@chr | 4.09E-11 | 0        |
| 31May2011 | 4069  | 850.97  | -25.0608 | 2 K.RGVRLSH chr2@2785   | 5.72E-10 | 0.008234 |
| 31May2011 | 1337  | 795.48  | -0.38412 | 1 K.LMLPPPK Splice@chr  | 5.31E-10 | 0.005247 |
| 31May2011 | 4941  | 664.7   | 1.197202 | 3 _PTLNK+1. chr1@6526   | 5.81E-12 | 0        |
| 31May2011 | 6410  | 783.45  | -3.51026 | 2 K.MLKK+14 chr5@1675   | 5.90E-10 | 0.00968  |
| 31May2011 | 4973  | 664.7   | 1.197202 | 3 _PTLNK+1. chr1@6526   | 1.27E-10 | 0        |
| 31May2011 | 4805  | 664.7   | 1.197202 | 3 _PTLNK+1. chr1@6526   | 1.70E-10 | 9.62E-04 |
| 31May2011 | 6418  | 880.49  | -16.5861 | 2 E.NWGIWK chr2@4129    | 4.61E-10 | 0.00736  |
| 31May2011 | 4758  | 664.36  | -7.23808 | 3 _PTLNK+1. chr1@6526   | 2.18E-10 | 0.002844 |
| 31May2011 | 5963  | 1003.19 | 17.13413 | 3 R.CWNRRA Splice@chr   | 3.15E-10 | 0.005639 |

|           |       |         |          |                         |          |          |
|-----------|-------|---------|----------|-------------------------|----------|----------|
| 31May2011 | 4785  | 664.7   | 1.197202 | 3 _PTLNK+1 chr1@6526    | 2.29E-11 | 0        |
| 31May2011 | 5844  | 664.7   | 1.197202 | 3 _PTLNK+1 chr1@6526    | 5.88E-11 | 0.002588 |
| 31May2011 | 5987  | 894     | -12.2343 | 2 _VETGIKP Splice@chr   | 3.00E-13 | 0        |
| 31May2011 | 5957  | 894     | -12.2343 | 2 _VETGIKP Splice@chr   | 8.34E-13 | 0        |
| 31May2011 | 7766  | 975.8   | -15.4281 | 3 K.SGTIFDNI Splice@chr | 1.52E-10 | 0.007246 |
| 31May2011 | 5925  | 894     | -12.2343 | 2 _VETGIKP Splice@chr   | 6.42E-14 | 0        |
| 31May2011 | 2576  | 1025.62 | -1.90621 | 1 K.LGLGSGL chr5@4945   | 3.77E-11 | 0.0013   |
| 31May2011 | 4789  | 894     | -12.2343 | 2 _VETGIKP Splice@chr   | 1.73E-13 | 0        |
| 31May2011 | 4821  | 894     | -12.2343 | 2 _VETGIKP Splice@chr   | 3.80E-12 | 0        |
| 31May2011 | 4855  | 894     | -12.2343 | 2 _VETGIKP Splice@chr   | 1.22E-12 | 0        |
| 31May2011 | 1740  | 795.48  | -0.38412 | 1 K.LMLPPPK Splice@chr  | 9.88E-10 | 0.009009 |
| 31May2011 | 1682  | 795.48  | -0.38412 | 1 K.LMLPPPK Splice@chr  | 7.89E-10 | 0.006349 |
| 31May2011 | 1711  | 795.48  | -0.38412 | 1 K.LMLPPPK Splice@chr  | 8.71E-10 | 0.009009 |
| 31May2011 | 1755  | 795.47  | -12.9834 | 1 K.LMLPPPK Splice@chr  | 1.01E-09 | 0.009009 |
| 31May2011 | 1724  | 795.48  | -0.38412 | 1 K.LMLPPPK Splice@chr  | 8.71E-10 | 0.009009 |
| 31May2011 | 1696  | 795.48  | -0.38412 | 1 K.LMLPPPK Splice@chr  | 8.75E-10 | 0.009009 |
| 31May2011 | 2318  | 650.09  | 28.62225 | 4 K.VQEK+14 chr4@9607   | 4.82E-10 | 0.004815 |
| 31May2011 | 2488  | 894.5   | -14.1127 | 2 _VETGIKP Splice@chr   | 4.61E-12 | 0        |
| 31May2011 | 2465  | 544.81  | -14.1192 | 4 K.IEFLAKER Splice@chr | 5.21E-10 | 0.00639  |
| 31May2011 | 928   | 548.8   | -21.3922 | 2 R.KFFVLGE chr5@7775   | 6.13E-10 | 0.007849 |
| 31May2011 | 1280  | 505.28  | -8.95659 | 3 _YINIVVIG Splice@chr  | 1.49E-13 | 0        |
| 31May2011 | 1262  | 505.28  | -8.95659 | 3 _YINIVVIG Splice@chr  | 4.85E-14 | 0        |
| 31May2011 | 1289  | 897.42  | -27.6753 | 3 _QVREMH Splice@chr    | 4.82E-10 | 0.004815 |
| 31May2011 | 2474  | 894.5   | -14.1127 | 2 _VETGIKP Splice@chr   | 2.06E-12 | 0        |
| 31May2011 | 6570  | 894.5   | -14.1127 | 2 _VETGIKP Splice@chr   | 1.56E-12 | 0        |
| 31May2011 | 7503  | 831.95  | -16.4251 | 2 K.PM+15.9 chr3@1124   | 5.07E-11 | 0.002037 |
| 31May2011 | 6447  | 664.7   | 1.197202 | 3 _PTLNK+1 chr1@6526    | 9.50E-12 | 7.19E-04 |
| 31May2011 | 6473  | 664.7   | 1.197202 | 3 _PTLNK+1 chr1@6526    | 4.57E-11 | 0.002037 |
| 31May2011 | 7981  | 819.1   | -3.35779 | 3 R.ITSSSVKN chr2@6680  | 5.78E-11 | 0.002037 |
| 31May2011 | 6539  | 894.5   | -14.1127 | 2 _VETGIKP Splice@chr   | 2.76E-13 | 0        |
| 31May2011 | 9424  | 1118.04 | -25.2263 | 2 L.LHHHRVL Splice@chr  | 2.23E-10 | 0.00546  |
| 31May2011 | 6611  | 917.48  | -5.49614 | 2 _LK+14.01 chr1@6455   | 3.09E-10 | 0.008852 |
| 31May2011 | 10533 | 578.81  | 28.62745 | 2 _YIFRDWE Splice@chr   | 1.80E-10 | 0.005186 |
| 31May2011 | 9771  | 893.99  | -23.4434 | 2 _VETGIKP Splice@chr   | 2.87E-11 | 3.49E-04 |
| 31May2011 | 9565  | 664.7   | 1.197202 | 3 _PTLNK+1 chr1@6526    | 9.89E-13 | 0        |
| 31May2011 | 10448 | 647.32  | -23.514  | 2 K.NCLKNFE chr4@1026   | 2.81E-10 | 0.008641 |
| 31May2011 | 3656  | 474.78  | 23.31842 | 2 _VLVKSCSI chr3@7042   | 3.07E-10 | 0.008852 |
| 31May2011 | 4386  | 1025.61 | -11.6755 | 1 K.LGLGSGL chr5@4945   | 2.82E-11 | 3.49E-04 |
| 31May2011 | 9520  | 664.69  | -13.8924 | 3 _PTLNK+1 chr1@6526    | 2.39E-10 | 0.006653 |
| 31May2011 | 6733  | 505.28  | -8.95659 | 3 _YINIVVIG Splice@chr  | 2.00E-14 | 0        |
| 31May2011 | 5518  | 447.75  | 26.50552 | 2 R.FGISATN chr3@3921   | 7.25E-11 | 0.002608 |
| 31May2011 | 9608  | 664.7   | 1.197202 | 3 _PTLNK+1 chr1@6526    | 2.90E-10 | 0.008852 |
| 31May2011 | 10524 | 675.33  | -24.7716 | 2 K.IEMEFLVI chrX@1244  | 2.41E-10 | 0.006919 |
| 31May2011 | 9683  | 894.49  | -25.3218 | 2 _VETGIKP Splice@chr   | 5.69E-13 | 0        |
| 31May2011 | 3211  | 666.37  | 7.7973   | 2 K.SNGSGAI Splice@chr  | 3.12E-10 | 0.00911  |
| 31May2011 | 11357 | 831.95  | -16.4251 | 2 K.PM+15.9 chr3@1124   | 1.60E-10 | 0.005186 |
| 31May2011 | 9725  | 894.49  | -25.3218 | 2 _VETGIKP Splice@chr   | 7.24E-13 | 0        |

|            |       |         |          |                         |          |          |
|------------|-------|---------|----------|-------------------------|----------|----------|
| 31May2011- | 12955 | 855.07  | -13.2446 | 3 _LIHKGTSC chr1@3087   | 1.81E-10 | 0.005186 |
| 31May2011- | 6279  | 732.07  | 19.51873 | 3 R.ATDDWII Splice@chr  | 2.39E-10 | 0.005122 |
| 31May2011- | 5458  | 1110.04 | -27.8308 | 2 L.LHHHRVL Splice@chr  | 3.67E-10 | 0.006892 |
| 31May2011- | 1463  | 416.56  | -17.4291 | 3 _TSRPQNF chr2@1374    | 6.04E-11 | 6.95E-04 |
| 31May2011- | 6037  | 831.95  | -16.4251 | 2 K.PM+15.9 chr3@1124   | 1.06E-10 | 0.002039 |
| 31May2011- | 4953  | 871.43  | -27.7267 | 1 R.LPVPECR chrX@1092   | 1.50E-10 | 0.002654 |
| 31May2011- | 5693  | 831.95  | -16.4251 | 2 K.PM+15.9 chr3@1124   | 3.20E-10 | 0.009339 |
| 31May2011- | 1515  | 416.56  | -17.4291 | 3 _TSRPQNF chr2@1374    | 9.37E-11 | 0.005352 |
| 31May2011- | 9908  | 557.06  | -8.53706 | 4 K.EVMLRPC chrX@1653   | 3.05E-10 | 0.004795 |
| 31May2011- | 5642  | 505.28  | -8.95659 | 3 _YINIVVIG Splice@chr  | 1.73E-13 | 0        |
| 31May2011- | 1561  | 795.47  | -12.9834 | 1 K.LMLPPPK Splice@chr  | 5.22E-10 | 0.009941 |
| 31May2011- | 8792  | 675.33  | -24.7716 | 2 K.IEMEFLVI chrX@1244  | 3.49E-10 | 0.006036 |
| 31May2011- | 10723 | 634.84  | 6.410455 | 2 R.VDIGDILF Splice@chr | 2.54E-11 | 0.001089 |
| 31May2011- | 9403  | 831.95  | -16.4251 | 2 K.PM+15.9 chr3@1124   | 5.38E-11 | 0.001735 |
| 31May2011- | 9938  | 557.06  | -8.53706 | 4 K.EVMLRPC chrX@1653   | 3.22E-10 | 0.005097 |
| 31May2011- | 8876  | 473.57  | -23.6784 | 3 R.TSFHSSL chr5@5498   | 2.69E-11 | 0.001089 |
| 31May2011- | 10868 | 818.45  | 0.561653 | 2 K.RTIVSVRI chrX@8304  | 4.20E-10 | 0.007876 |
| 31May2011- | 4230  | 1089.65 | -29.1532 | 1 K.KLKSMKN chr5@3701   | 2.26E-10 | 0.003914 |
| 31May2011- | 10134 | 634.84  | 6.410455 | 2 R.VDIGDILF Splice@chr | 1.49E-10 | 0.004365 |
| 31May2011- | 8715  | 1110.04 | -27.8308 | 2 L.LHHHRVL Splice@chr  | 2.99E-10 | 0.005245 |
| 31May2011- | 4193  | 975.56  | -10.3963 | 1 K.IPKMPVY chr2@1115   | 1.34E-10 | 0.003312 |
| 31May2011- | 8979  | 831.95  | -16.4251 | 2 K.PM+15.9 chr3@1124   | 2.23E-10 | 0.005245 |
| 31May2011- | 8478  | 675.33  | -24.7716 | 2 K.IEMEFLVI chrX@1244  | 3.55E-10 | 0.005882 |
| 31May2011- | 7750  | 664.7   | 1.197202 | 3 _PTLNK+1 chr1@6526    | 2.40E-10 | 0.005245 |
| 31May2011- | 3591  | 1025.62 | -1.90621 | 1 K.LGLGSGI chr5@4945   | 2.84E-11 | 8.00E-04 |
| 31May2011- | 1601  | 795.48  | -0.38412 | 1 K.LMLPPPK Splice@chr  | 5.17E-10 | 0.008886 |
| 31May2011- | 3086  | 624.37  | -27.8761 | 2 _IIPVSVVN chr5@2025   | 1.38E-10 | 0.003312 |
| 31May2011- | 6631  | 625.32  | -27.4566 | 4 R.M+15.99 chrX@6806   | 5.19E-10 | 0.008886 |
| 31May2011- | 8952  | 831.95  | -16.4251 | 2 K.PM+15.9 chr3@1124   | 5.49E-11 | 0.001533 |
| 31May2011- | 4400  | 429.25  | -19.383  | 3 R.VVTKNGL chr5@1641   | 5.42E-10 | 0.009199 |
| 8Mar2011-  | 8193  | 435.25  | -4.00582 | 2 K.KISAHGTI chr4@1727  | 3.76E-10 | 0.009734 |
| 8Mar2011-  | 5352  | 741.39  | -17.2291 | 2 K.QKSNWH chr5@1229    | 7.46E-11 | 0.002335 |
| 8Mar2011-  | 12112 | 694.54  | 11.7794  | 5 _HTGPGVI Splice@chr   | 5.89E-11 | 0.002123 |
| 8Mar2011-  | 19042 | 1132.57 | -11.4349 | 2 G.WLLFWG Splice@chr   | 8.60E-11 | 0.002774 |
| 8Mar2011-  | 18501 | 634.84  | 6.410455 | 2 R.VDIGDILF Splice@chr | 1.06E-12 | 0        |
| 8Mar2011-  | 20106 | 1147.25 | 13.44098 | 3 R.FQSAAIG Splice@chr  | 1.37E-13 | 0        |
| 8Mar2011-  | 19506 | 996.87  | -23.3576 | 3 S.VPFSK+14 Splice@chr | 8.17E-11 | 0.002556 |
| 8Mar2011-  | 5408  | 741.39  | -17.2291 | 2 K.QKSNWH chr5@1229    | 2.94E-11 | 0.00136  |
| 8Mar2011-  | 6985  | 434.24  | 13.9946  | 3 _RSNDQTI chr5@6378    | 2.06E-10 | 0.005467 |
| 8Mar2011-  | 2662  | 819.43  | 10.73915 | 1 R.EATETIR chrX@2916   | 3.78E-10 | 0.009838 |
| 8Mar2011-  | 8187  | 973.54  | 22.71928 | 1 K.KNNNNK chrX@9628    | 3.59E-10 | 0.009423 |
| 8Mar2011-  | 14729 | 1005.47 | -16.3827 | 2 K.KVELALW Splice@chr  | 1.34E-22 | 0        |
| 8Mar2011-  | 12651 | 1156.89 | 7.624255 | 3 _HTGPGVI Splice@chr   | 1.10E-12 | 0        |
| 8Mar2011-  | 10257 | 897.42  | -27.6753 | 3 _QVREMH Splice@chr    | 3.45E-10 | 0.009248 |
| 8Mar2011-  | 15949 | 991.51  | 24.02083 | 3 _IYVPADD Splice@chr   | 1.33E-15 | 0        |
| 8Mar2011-  | 12069 | 1156.57 | 20.14189 | 3 _HTGPGVI Splice@chr   | 5.42E-12 | 0        |
| 8Mar2011-  | 2788  | 473.76  | -14.1369 | 2 R.ILCASRAF chr5@2078  | 2.68E-10 | 0.007244 |

|           |       |         |          |                          |          |          |
|-----------|-------|---------|----------|--------------------------|----------|----------|
| 8Mar2011- | 9698  | 509.3   | -20.473  | 2 R.SSVIMLIV chr2@5767   | 2.52E-10 | 0.006834 |
| 8Mar2011- | 7734  | 1025.62 | -1.90621 | 1 K.LGLGSGL chr5@4945    | 1.27E-11 | 5.25E-04 |
| 8Mar2011- | 13509 | 855.41  | -22.1447 | 2 _._HVQEVAI Splice@chr  | 2.44E-11 | 0.00136  |
| 8Mar2011- | 17355 | 895.78  | -1.06827 | 3 _._RELTEEDI Splice@chr | 8.64E-12 | 3.98E-04 |
| 8Mar2011- | 5716  | 741.39  | -17.2291 | 2 K.QKSNWH chr5@1229     | 1.92E-11 | 0.001144 |
| 8Mar2011- | 11519 | 671.37  | -24.0361 | 2 T.FNIVHTQ Splice@chr   | 3.11E-10 | 0.008367 |
| 8Mar2011- | 14481 | 563.87  | -6.34728 | 2 R.QNK+14. Splice@chr   | 3.41E-11 | 0.001475 |
| 8Mar2011- | 18487 | 805.47  | -13.7324 | 2 K.TPIFIPAP' chr5@1861  | 1.47E-10 | 0.003893 |
| 8Mar2011- | 10662 | 1075.06 | -6.79295 | 2 R.TCSK+14. chr2@1255   | 2.01E-10 | 0.005373 |
| 8Mar2011- | 18478 | 1150.11 | 10.65536 | 2 K.IDKYTLM chr2@1049    | 1.17E-10 | 0.003276 |
| 8Mar2011- | 4053  | 439.91  | 17.33685 | 3 K.NSQKNPI chr2@3540    | 5.36E-11 | 0.002024 |
| 8Mar2011- | 5351  | 494.6   | -1.40142 | 3 K.FPENRHI' chr2@1477   | 2.95E-10 | 0.007639 |
| 8Mar2011- | 17203 | 965.49  | -9.59113 | 2 _._RFAEFAG chr2@1518   | 3.50E-11 | 0.001595 |
| 8Mar2011- | 19974 | 985.55  | -18.1844 | 3 R.K+14.016 chrX@1171   | 2.03E-11 | 0.001144 |
| 8Mar2011- | 17448 | 1003.52 | 12.6889  | 3 R.CWNRRA Splice@chr    | 3.43E-11 | 0.001475 |
| 8Mar2011- | 12120 | 1156.9  | 16.3571  | 3 _._HTGPGVI Splice@chr  | 1.82E-16 | 0        |
| 8Mar2011- | 2616  | 562.31  | -13.4391 | 2 R.FYLLYLYK Splice@chr  | 4.80E-11 | 0.001916 |
| 8Mar2011- | 19134 | 678.86  | -16.6575 | 2 K.QRSRPVI chr5@8132    | 1.23E-10 | 0.003276 |
| 8Mar2011- | 18547 | 634.84  | 6.410455 | 2 R.VDIGDILF Splice@chr  | 3.81E-12 | 0        |
| 8Mar2011- | 17794 | 895.79  | 10.03186 | 3 _._RELTEEDI Splice@chr | 3.90E-12 | 0        |
| 8Mar2011- | 14421 | 1153.23 | -17.5731 | 3 F.EGIRTTG' Splice@chr  | 1.29E-13 | 0        |
| 8Mar2011- | 10248 | 663.85  | -5.06443 | 2 N.KMIFSMI chr4@8622    | 2.61E-10 | 0.007041 |
| 8Mar2011- | 20048 | 1147.25 | 13.44098 | 3 R.FQSAAIG Splice@chr   | 1.52E-14 | 0        |
| 8Mar2011- | 16764 | 936.53  | 15.52779 | 2 _._DTYYSNK chr2@6987   | 6.66E-11 | 0.002123 |
| 8Mar2011- | 20703 | 1174.62 | 7.800997 | 2 K.INWAVTI chr4@2890    | 8.34E-22 | 0        |
| 8Mar2011- | 20704 | 783.42  | 13.00166 | 3 K.INWAVTI chr4@2890    | 1.15E-15 | 0        |
| 8Mar2011- | 20060 | 688.75  | 8.895763 | 5 R.FQSAAIG Splice@chr   | 5.82E-11 | 0.002123 |
| 8Mar2011- | 4438  | 439.91  | 17.33685 | 3 K.NSQKNPI chr2@3540    | 3.36E-10 | 0.009048 |
| 8Mar2011- | 9804  | 688.04  | -2.57653 | 3 L.IFK+14.01 chr3@8836  | 3.67E-10 | 0.009423 |
| 8Mar2011- | 11575 | 671.37  | -24.0361 | 2 T.FNIVHTQ Splice@chr   | 2.46E-10 | 0.006733 |
| 8Mar2011- | 16165 | 937     | -18.3647 | 2 R.NPFLEEV' chr3@1097   | 7.47E-11 | 0.002335 |
| 8Mar2011- | 1164  | 585.8   | -7.30589 | 2 K.QDPISAT' Splice@chr  | 3.18E-10 | 0.008555 |
| 8Mar2011- | 14867 | 983.97  | 4.629411 | 2 R.SFSTIPDS chr2@1305   | 6.15E-16 | 0        |
| 8Mar2011- | 20079 | 1147.25 | 13.44098 | 3 R.FQSAAIG Splice@chr   | 1.61E-15 | 0        |
| 8Mar2011- | 19450 | 868     | -24.287  | 2 R.SRFTRILL' Splice@chr | 3.65E-10 | 0.009423 |
| 8Mar2011- | 5303  | 741.39  | -17.2291 | 2 K.QKSNWH chr5@1229     | 2.03E-11 | 0.001144 |
| 8Mar2011- | 7266  | 534.32  | 13.11853 | 2 K.TNIYTILTI chr5@1329  | 3.22E-10 | 0.008555 |
| 8Mar2011- | 12703 | 1156.9  | 16.3571  | 3 _._HTGPGVI Splice@chr  | 7.14E-13 | 0        |
| 8Mar2011- | 16369 | 732.07  | 19.51873 | 3 R.ATDDWII Splice@chr   | 5.00E-11 | 0.001916 |
| 8Mar2011- | 17186 | 746.91  | 13.99266 | 2 V.EK+14.01 Splice@chr  | 2.61E-11 | 0.001225 |
| 8Mar2011- | 5687  | 741.39  | -17.2291 | 2 K.QKSNWH chr5@1229     | 2.56E-11 | 0.001225 |
| 8Mar2011- | 18759 | 805.97  | -15.8175 | 2 K.TPIFIPAP' chr5@1861  | 1.09E-10 | 0.003374 |
| 8Mar2011- | 18766 | 634.84  | 6.410455 | 2 R.VDIGDILF Splice@chr  | 3.45E-12 | 2.83E-04 |
| 8Mar2011- | 3901  | 439.91  | 17.33685 | 3 K.NSQKNPI chr2@3540    | 2.03E-11 | 8.81E-04 |
| 8Mar2011- | 13153 | 702.98  | 26.58388 | 2 _._FKFPRIK+ chr1@1071  | 1.30E-10 | 0.003913 |
| 8Mar2011- | 10311 | 886     | 3.172487 | 2 F.ENVVVEVII Splice@chr | 4.07E-12 | 2.83E-04 |
| 8Mar2011- | 7231  | 534.32  | 13.11853 | 2 K.TNIYTILTI chr5@1329  | 1.53E-10 | 0.004427 |

|           |       |         |          |                         |          |          |
|-----------|-------|---------|----------|-------------------------|----------|----------|
| 8Mar2011- | 20387 | 860.69  | 14.08015 | 4 R.FQSAAIG Splice@chr  | 1.21E-14 | 0        |
| 8Mar2011- | 10256 | 886     | 3.172487 | 2 F.ENVVEVII Splice@chr | 2.97E-12 | 1.46E-04 |
| 8Mar2011- | 11057 | 657.04  | -26.9179 | 3 R.GNVRK+1 chrX@7490   | 8.63E-11 | 0.00264  |
| 8Mar2011- | 21346 | 930.01  | 0.691376 | 2 _DTYYSNK chr2@6987    | 2.94E-10 | 0.007108 |
| 8Mar2011- | 5331  | 741.39  | -17.2291 | 2 K.QKSNWH chr5@1229    | 4.51E-11 | 0.001318 |
| 8Mar2011- | 7712  | 1025.62 | -1.90621 | 1 K.LGLGSL chr5@4945    | 6.67E-12 | 3.99E-04 |
| 8Mar2011- | 10152 | 526.29  | -15.3375 | 3 R.SQPLQAK Splice@chr  | 1.88E-10 | 0.004682 |
| 8Mar2011- | 18995 | 606.66  | 14.98224 | 3 R.RDSRRSV Splice@chr  | 2.01E-10 | 0.005078 |
| 8Mar2011- | 10192 | 663.85  | -5.06443 | 2 N.KMIFSMI chr4@8622   | 3.20E-10 | 0.00781  |
| 8Mar2011- | 1541  | 586.32  | 24.0591  | 2 K.QDPISATi chr5@9928  | 2.06E-11 | 8.81E-04 |
| 8Mar2011- | 8698  | 725.88  | 19.33943 | 2 R.MEHLCRI Splice@chr  | 3.92E-10 | 0.009179 |
| 8Mar2011- | 18814 | 634.84  | 6.410455 | 2 R.VDIGDILF Splice@chr | 2.99E-12 | 1.46E-04 |
| 8Mar2011- | 2935  | 562.31  | -13.4391 | 2 R.FYLLYLYK Splice@chr | 5.77E-11 | 0.001534 |
| 8Mar2011- | 5383  | 741.39  | -17.2291 | 2 K.QKSNWH chr5@1229    | 9.14E-11 | 0.002974 |
| 8Mar2011- | 10250 | 663.85  | -5.06443 | 2 N.KMIFSMI chr4@8622   | 2.55E-10 | 0.006302 |
| 8Mar2011- | 20377 | 1147.25 | 13.44098 | 3 R.FQSAAIG Splice@chr  | 1.62E-17 | 0        |
| 8Mar2011- | 7170  | 533.82  | 16.26677 | 2 K.TNIYTILTI chr5@1329 | 2.41E-10 | 0.005783 |
| 8Mar2011- | 18020 | 895.78  | -1.06827 | 3 _RELTEEDI Splice@chr  | 7.67E-13 | 0        |
| 8Mar2011- | 12030 | 694.54  | 11.7794  | 5 _HTGPGVI Splice@chr   | 5.90E-11 | 0.001645 |
| 8Mar2011- | 1625  | 585.79  | -24.4226 | 2 K.QDPISATi chr5@9928  | 3.06E-11 | 0.001225 |
| 8Mar2011- | 2819  | 915.47  | 1.201399 | 1 K.FHEIGGQ chrX@4727   | 1.36E-10 | 0.004227 |
| 8Mar2011- | 5447  | 741.39  | -17.2291 | 2 K.QKSNWH chr5@1229    | 2.37E-11 | 0.001123 |
| 8Mar2011- | 2530  | 508.6   | 0.721467 | 3 R.LHFCLLPs chr2@3274  | 2.24E-10 | 0.00517  |
| 8Mar2011- | 9261  | 862.48  | -24.8232 | 1 R.KMRIADk chr4@1399   | 3.81E-10 | 0.008985 |
| 8Mar2011- | 20747 | 828.39  | -8.00743 | 2 K.PNLK+14 chr2@3862   | 1.33E-10 | 0.003913 |
| 8Mar2011- | 17490 | 756.05  | -0.97004 | 3 _EM+15.9 chr4@6159    | 4.00E-10 | 0.009373 |
| 8Mar2011- | 17691 | 1003.52 | 12.6889  | 3 R.CWNRRA Splice@chr   | 7.34E-14 | 0        |
| 8Mar2011- | 17615 | 895.78  | -1.06827 | 3 _RELTEEDI Splice@chr  | 4.21E-12 | 2.83E-04 |
| 8Mar2011- | 2818  | 459.74  | 26.97556 | 2 _ERQNGG chr1@1431     | 5.06E-11 | 0.00143  |
| 8Mar2011- | 10646 | 1075.06 | -6.79295 | 2 R.TCSK+14. chr2@1255  | 1.89E-10 | 0.004682 |
| 8Mar2011- | 21366 | 601     | 8.884201 | 3 K.QFLTFLT/ chr4@7690  | 2.33E-10 | 0.005586 |
| 8Mar2011- | 14513 | 1153.23 | -17.5731 | 3 F.EGIRTTGG Splice@chr | 6.61E-14 | 0        |
| 8Mar2011- | 763   | 743.48  | 2.794988 | 1 K.KIGGAGII chr1@2885  | 8.66E-11 | 0.00264  |
| 8Mar2011- | 10698 | 1075.06 | -6.79295 | 2 R.TCSK+14. chr2@1255  | 4.09E-10 | 0.009676 |
| 8Mar2011- | 4799  | 571.99  | 18.36266 | 3 K.KNSIFQP/ chr1@2570  | 4.15E-10 | 0.009869 |
| 8Mar2011- | 7046  | 591     | -1.24141 | 3 F.ENVVEVII Splice@chr | 2.72E-12 | 1.46E-04 |
| 8Mar2011- | 12885 | 838.94  | -22.1914 | 2 R.QFADLPS chr5@1898   | 1.54E-10 | 0.004534 |
| 8Mar2011- | 5755  | 741.39  | -17.2291 | 2 K.QKSNWH chr5@1229    | 5.24E-12 | 3.99E-04 |
| 8Mar2011- | 16040 | 826.46  | 16.61153 | 2 _K+14.016 Splice@chr  | 1.15E-10 | 0.003374 |
| 8Mar2011- | 19337 | 1132.57 | -11.4349 | 2 G.WLLFWG Splice@chr   | 1.69E-10 | 0.004614 |
| 8Mar2011- | 1010  | 748.36  | 16.41564 | 1 R.ATAGDGI chr3@5845   | 4.91E-12 | 3.99E-04 |
| 8Mar2011- | 11650 | 671.37  | -24.0361 | 2 T.FNIVHTQ Splice@chr  | 2.19E-10 | 0.00517  |
| 8Mar2011- | 20970 | 783.75  | 7.307848 | 3 K.INWAVTI chr4@2890   | 4.81E-14 | 0        |
| 8Mar2011- | 6619  | 743.45  | -11.6388 | 2 E.NMLLK+1 chr5@8542   | 2.65E-10 | 0.006509 |
| 8Mar2011- | 7390  | 534.32  | 13.11853 | 2 K.TNIYTILTI chr5@1329 | 3.02E-10 | 0.007312 |
| 8Mar2011- | 5637  | 741.39  | -17.2291 | 2 K.QKSNWH chr5@1229    | 1.73E-11 | 5.13E-04 |
| 8Mar2011- | 12070 | 1156.56 | 11.5499  | 3 _HTGPGVI Splice@chr   | 3.42E-13 | 0        |

|           |       |         |          |                         |          |          |
|-----------|-------|---------|----------|-------------------------|----------|----------|
| 8Mar2011- | 7767  | 1025.62 | -1.90621 | 1 K.LGLGSGL chr5@4945   | 1.35E-11 | 5.13E-04 |
| 8Mar2011- | 16647 | 732.07  | 19.51873 | 3 R.ATDDWII Splice@chr  | 3.06E-10 | 0.007618 |
| 8Mar2011- | 19382 | 1132.56 | -20.1729 | 2 G.WLLFWG Splice@chr   | 4.90E-12 | 3.99E-04 |
| 8Mar2011- | 17465 | 987.5   | -5.85708 | 3 K.KYLFLDNI chr4@1288  | 1.26E-11 | 5.13E-04 |
| 8Mar2011- | 8141  | 871.92  | 9.692321 | 4 _HTGPGVI Splice@chr   | 2.58E-10 | 0.005476 |
| 8Mar2011- | 3604  | 748.39  | -27.6021 | 2 K.QKSNWH chr5@1229    | 4.54E-11 | 0.001322 |
| 8Mar2011- | 13342 | 818.17  | 14.73832 | 4 S.DFFPTEQ Splice@chr  | 3.43E-12 | 3.37E-04 |
| 8Mar2011- | 12254 | 888.47  | 22.8338  | 2 K.DITLEVEA Splice@chr | 4.95E-13 | 1.81E-04 |
| 8Mar2011- | 12511 | 1165.61 | 1.914663 | 2 Q.VCSKGRF Splice@chr  | 4.36E-11 | 0.001183 |
| 8Mar2011- | 8622  | 657.04  | -26.9179 | 3 R.GNVRK+1 chrX@7490   | 3.18E-10 | 0.007249 |
| 8Mar2011- | 17766 | 802.41  | 12.28004 | 1 K.RDPNGSF chr2@1095   | 1.37E-10 | 0.003726 |
| 8Mar2011- | 17228 | 783.75  | 7.307848 | 3 K.INWAVTI chr4@2890   | 9.27E-15 | 0        |
| 8Mar2011- | 2831  | 741.39  | -17.2291 | 2 K.QKSNWH chr5@1229    | 3.80E-11 | 0.001037 |
| 8Mar2011- | 10453 | 801.71  | 5.720343 | 3 K.FFKPNTD chr5@7527   | 1.20E-16 | 0        |
| 8Mar2011- | 16728 | 860.69  | 14.08015 | 4 R.FQSAAIG Splice@chr  | 4.58E-15 | 0        |
| 8Mar2011- | 2730  | 741.39  | -17.2291 | 2 K.QKSNWH chr5@1229    | 2.30E-11 | 0.001037 |
| 8Mar2011- | 15489 | 634.84  | 6.410455 | 2 R.VDIGDILF Splice@chr | 7.38E-12 | 4.87E-04 |
| 8Mar2011- | 3553  | 748.4   | -14.2094 | 2 K.QKSNWH chr5@1229    | 3.27E-11 | 0.001037 |
| 8Mar2011- | 13542 | 772.71  | -23.9209 | 3 K.QSTKMKI chr2@9078   | 4.11E-10 | 0.009342 |
| 8Mar2011- | 2776  | 741.39  | -17.2291 | 2 K.QKSNWH chr5@1229    | 5.79E-11 | 0.001747 |
| 8Mar2011- | 14361 | 965.49  | -9.59113 | 2 _RFAEFAG chr2@1518    | 2.09E-10 | 0.004735 |
| 8Mar2011- | 17227 | 1175.13 | 14.90082 | 2 K.INWAVTI chr4@2890   | 7.75E-20 | 0        |
| 8Mar2011- | 1357  | 692.35  | 11.91862 | 2 K.TAEHVEC Splice@chr  | 1.15E-12 | 1.81E-04 |
| 8Mar2011- | 14908 | 895.78  | -1.06827 | 3 _RELTEEDI Splice@chr  | 3.36E-11 | 0.001037 |
| 8Mar2011- | 10348 | 801.71  | 5.720343 | 3 K.FFKPNTD chr5@7527   | 3.32E-16 | 0        |
| 8Mar2011- | 13471 | 899.47  | 5.842265 | 2 R.SKNK+14 chrX@1700   | 1.60E-10 | 0.004119 |
| 8Mar2011- | 9459  | 867.92  | 8.25809  | 4 _HTGPGVI Splice@chr   | 4.36E-10 | 0.009827 |
| 8Mar2011- | 4568  | 895.51  | -6.04083 | 2 _SGISIEVN Splice@chr  | 3.36E-10 | 0.008001 |
| 8Mar2011- | 1019  | 756.39  | 1.131206 | 2 K.KTAEHVE Splice@chr  | 4.35E-13 | 1.81E-04 |
| 8Mar2011- | 11151 | 806.38  | 3.362099 | 3 K.FFKPNTD chr5@7527   | 2.69E-16 | 0        |
| 8Mar2011- | 13391 | 1090.56 | 17.20393 | 3 S.DFFPTEQ Splice@chr  | 4.51E-11 | 0.001322 |
| 8Mar2011- | 16737 | 688.75  | 8.895763 | 5 R.FQSAAIG Splice@chr  | 1.83E-11 | 7.77E-04 |
| 8Mar2011- | 2992  | 741.39  | -17.2291 | 2 K.QKSNWH chr5@1229    | 2.47E-11 | 0.001037 |
| 8Mar2011- | 14535 | 1104.83 | 4.296498 | 3 S.EDLGSDA Splice@chr  | 4.11E-22 | 0        |
| 8Mar2011- | 5769  | 821.45  | 0.743931 | 1 R.RHAPNAI Splice@chr  | 4.47E-10 | 0.009942 |
| 8Mar2011- | 2884  | 741.39  | -17.2291 | 2 K.QKSNWH chr5@1229    | 5.36E-11 | 0.001747 |
| 8Mar2011- | 16256 | 996.87  | -23.3576 | 3 S.VPFSK+14 Splice@chr | 8.25E-11 | 0.002136 |
| 8Mar2011- | 9686  | 669.35  | -20.3327 | 2 _NCSKK+1 chr3@1116    | 4.52E-10 | 0.009942 |
| 8Mar2011- | 16984 | 770.77  | -11.1838 | 3 K.YLDAKCK chr4@3751   | 4.51E-10 | 0.009942 |
| 8Mar2011- | 14878 | 895.78  | -1.06827 | 3 _RELTEEDI Splice@chr  | 5.83E-11 | 0.001747 |
| 8Mar2011- | 14537 | 895.78  | -1.06827 | 3 _RELTEEDI Splice@chr  | 1.17E-12 | 1.81E-04 |
| 8Mar2011- | 7793  | 663.85  | -5.06443 | 2 N.KMIFSMI chr4@8622   | 4.24E-10 | 0.009584 |
| 8Mar2011- | 9023  | 966.47  | 15.71935 | 2 _QKNCKEI chrX@1368    | 2.37E-10 | 0.005229 |
| 8Mar2011- | 14495 | 895.78  | -1.06827 | 3 _RELTEEDI Splice@chr  | 7.00E-12 | 4.87E-04 |
| 8Mar2011- | 2937  | 741.39  | -17.2291 | 2 K.QKSNWH chr5@1229    | 5.10E-11 | 0.001466 |
| 8Mar2011- | 1408  | 692.35  | 11.91862 | 2 K.TAEHVEC Splice@chr  | 5.22E-13 | 1.81E-04 |
| 8Mar2011- | 14582 | 1104.84 | 13.44131 | 3 S.EDLGSDA chr5@7527   | 2.91E-17 | 0        |

|           |       |         |          |                          |          |          |
|-----------|-------|---------|----------|--------------------------|----------|----------|
| 8Mar2011- | 4303  | 693.87  | -6.6949  | 2 V.ICVAVGD chr5@1063    | 1.14E-11 | 6.35E-04 |
| 8Mar2011- | 9461  | 1156.56 | 11.5499  | 3 _..HTGPGVI Splice@chr  | 1.41E-14 | 0        |
| 8Mar2011- | 7739  | 663.85  | -5.06443 | 2 N.KMIFSMI chr4@8622    | 3.27E-10 | 0.007369 |
| 8Mar2011- | 996   | 756.39  | 1.131206 | 2 K.KTAEHVE chr5@1002    | 9.54E-14 | 1.81E-04 |
| 8Mar2011- | 13389 | 818.17  | 14.73832 | 4 S.DFFPTEQ Splice@chr   | 7.31E-13 | 1.81E-04 |
| 8Mar2011- | 3240  | 741.39  | -17.2291 | 2 K.QKSNWH chr5@1229     | 8.50E-12 | 4.87E-04 |
| 8Mar2011- | 10947 | 855.41  | -22.1447 | 2 _..HVQEVAI Splice@chr  | 5.68E-11 | 0.001747 |
| 8Mar2011- | 10396 | 801.71  | 5.720343 | 3 K.FFKPNTD chr5@7527    | 2.29E-16 | 0        |
| 8Mar2011- | 3181  | 741.39  | -17.2291 | 2 K.QKSNWH chr5@1229     | 1.69E-11 | 7.77E-04 |
| 8Mar2011- | 11210 | 806.05  | 8.794745 | 3 K.FFKPNTD chr5@7527    | 3.76E-17 | 0        |
| 8Mar2011- | 10821 | 607     | -9.70672 | 3 I.NRFNISK chrX@1250    | 8.51E-11 | 0.002412 |
| 8Mar2011- | 18077 | 1075.03 | -23.9629 | 2 R.TRWK+1+ Splice@chr   | 2.79E-10 | 0.005977 |
| 8Mar2011- | 12316 | 888.47  | 22.8338  | 2 K.DITLEVEA Splice@chr  | 1.61E-12 | 1.81E-04 |
| 8Mar2011- | 5653  | 741.39  | -17.2291 | 2 K.QKSNWH chr5@1229     | 1.71E-11 | 2.87E-04 |
| 8Mar2011- | 14817 | 751.39  | 6.228047 | 2 _..CLDMFSF chr4@3959   | 3.69E-10 | 0.009636 |
| 8Mar2011- | 3483  | 461.9   | 6.268311 | 3 K.TAEHVEC chr5@1002    | 3.06E-10 | 0.008456 |
| 8Mar2011- | 3176  | 695.35  | -9.5814  | 2 R.SSAEK+1+ chr3@3299   | 8.98E-11 | 0.002609 |
| 8Mar2011- | 16697 | 987.51  | 4.289691 | 3 K.KYLFLDNI chr4@1288   | 5.00E-11 | 0.001354 |
| 8Mar2011- | 16847 | 895.78  | -1.06827 | 3 _..RELTEEDI Splice@chr | 4.47E-12 | 0        |
| 8Mar2011- | 5816  | 741.39  | -17.2291 | 2 K.QKSNWH chr5@1229     | 2.81E-11 | 6.99E-04 |
| 8Mar2011- | 12246 | 867.92  | 8.25809  | 4 _..HTGPGVI Splice@chr  | 1.41E-10 | 0.004793 |
| 8Mar2011- | 9532  | 616.33  | -16.7632 | 2 K.LSKSVIFQ chr3@2798   | 3.23E-10 | 0.008907 |
| 8Mar2011- | 14325 | 1005.47 | -16.3827 | 2 K.KVELALW Splice@chr   | 9.60E-23 | 0        |
| 8Mar2011- | 3571  | 692.35  | 11.91862 | 2 K.TAEHVEC Splice@chr   | 9.42E-14 | 0        |
| 8Mar2011- | 13946 | 1153.23 | -17.5731 | 3 F.EGIRTGG Splice@chr   | 3.56E-13 | 0        |
| 8Mar2011- | 1586  | 422.77  | -1.80854 | 2 K.IGKGEVLI chrX@1204   | 1.99E-10 | 0.005573 |
| 8Mar2011- | 3518  | 692.34  | -2.47201 | 2 K.TAEHVEC Splice@chr   | 6.05E-14 | 0        |
| 8Mar2011- | 833   | 743.48  | 2.794988 | 1 K.KIGGAGII chr1@2883   | 1.73E-10 | 0.005128 |
| 8Mar2011- | 3473  | 692.35  | 11.91862 | 2 K.TAEHVEC Splice@chr   | 1.41E-12 | 0        |
| 8Mar2011- | 13379 | 806.38  | 3.362099 | 3 K.FFKPNTD chr5@7527    | 1.72E-16 | 0        |
| 8Mar2011- | 1540  | 422.27  | 2.173301 | 2 K.IGKGEVLI chrX@1204   | 1.02E-10 | 0.003226 |
| 8Mar2011- | 2526  | 756.39  | 1.131206 | 2 K.KTAEHVE Splice@chr   | 2.20E-13 | 0        |
| 8Mar2011- | 19194 | 1147.25 | 13.44098 | 3 R.FQSAAIG Splice@chr   | 4.73E-17 | 0        |
| 8Mar2011- | 19195 | 860.69  | 14.08015 | 4 R.FQSAAIG Splice@chr   | 2.48E-14 | 0        |
| 8Mar2011- | 11856 | 881.92  | -2.80647 | 2 F.LQEQGTY Splice@chr   | 1.09E-10 | 0.003226 |
| 8Mar2011- | 7208  | 533.82  | 16.26677 | 2 K.TNIYTILTI chr5@1329  | 2.25E-10 | 0.006642 |
| 8Mar2011- | 14506 | 888.47  | 22.8338  | 2 K.DITLEVEA Splice@chr  | 1.95E-12 | 0        |
| 8Mar2011- | 4626  | 720.83  | 6.444233 | 2 K.CVEDYRD chr5@7527    | 2.16E-11 | 4.26E-04 |
| 8Mar2011- | 19173 | 1147.25 | 13.44098 | 3 R.FQSAAIG Splice@chr   | 2.43E-16 | 0        |
| 8Mar2011- | 3068  | 915.48  | 12.14748 | 1 K.FHEIGGQ chrX@4727    | 1.36E-10 | 0.004451 |
| 8Mar2011- | 17802 | 805.97  | -15.8175 | 2 K.TPIFIPAP chr5@1861   | 4.60E-11 | 0.001354 |
| 8Mar2011- | 1919  | 672.36  | 14.91008 | 2 R.M+15.99 Splice@chr   | 7.59E-11 | 0.001985 |
| 8Mar2011- | 5540  | 741.39  | -17.2291 | 2 K.QKSNWH chr5@1229     | 4.61E-11 | 0.001354 |
| 8Mar2011- | 8275  | 821.45  | 0.743931 | 1 R.RHAPNAI Splice@chr   | 2.68E-10 | 0.008237 |
| 8Mar2011- | 9341  | 1137.65 | -15.1425 | 1 Q.FLVISFA chrX@1232    | 2.58E-10 | 0.007807 |
| 8Mar2011- | 15707 | 899.97  | 3.975293 | 2 R.SKNK+14 chrX@1700    | 3.86E-10 | 0.00985  |
| 8Mar2011- | 15925 | 855.8   | -7.30893 | 3 _..RVKYQKI Splice@chr  | 1.64E-10 | 0.005018 |

|           |       |         |          |                          |          |          |
|-----------|-------|---------|----------|--------------------------|----------|----------|
| 8Mar2011- | 16931 | 987.84  | -0.22613 | 3 K.KYLFLDNI chr4@1288   | 5.56E-11 | 0.001471 |
| 8Mar2011- | 12421 | 1156.89 | 7.624255 | 3 _..HTGPGVI Splice@chr  | 1.02E-13 | 0        |
| 8Mar2011- | 3527  | 461.9   | 6.268311 | 3 K.TAEHVEC Splice@chr   | 1.38E-11 | 2.87E-04 |
| 8Mar2011- | 7643  | 717.89  | -17.2831 | 2 K.LRGWNK chr3@8881     | 3.31E-10 | 0.009129 |
| 8Mar2011- | 5930  | 741.39  | -17.2291 | 2 K.QKSNWH chr5@1229     | 6.07E-11 | 0.001471 |
| 8Mar2011- | 13848 | 1153.23 | -17.5731 | 3 F.EGIRTGG Splice@chr   | 3.44E-15 | 0        |
| 8Mar2011- | 13994 | 1153.23 | -17.5731 | 3 F.EGIRTGG Splice@chr   | 1.76E-13 | 0        |
| 8Mar2011- | 12707 | 801.71  | 5.720343 | 3 K.FFKPNTD chr5@7527    | 4.98E-16 | 0        |
| 8Mar2011- | 5873  | 741.39  | -17.2291 | 2 K.QKSNWH chr5@1229     | 4.81E-11 | 0.001354 |
| 8Mar2011- | 16832 | 1104.83 | 4.296498 | 3 S.EDLGSDA chr5@7527    | 2.66E-20 | 0        |
| 8Mar2011- | 19632 | 1175.12 | 6.371728 | 2 K.INWAVTI chr4@2890    | 4.03E-18 | 0        |
| 8Mar2011- | 12255 | 1156.89 | 7.624255 | 3 _..HTGPGVI Splice@chr  | 7.99E-13 | 0        |
| 8Mar2011- | 14754 | 1165.61 | 1.914663 | 2 Q.VCSKGRE Splice@chr   | 1.43E-10 | 0.004793 |
| 8Mar2011- | 15546 | 818.17  | 14.73832 | 4 S.DFFPTEQ Splice@chr   | 8.68E-15 | 0        |
| 8Mar2011- | 10503 | 1162.23 | 14.80982 | 3 _..HTGPGVI Splice@chr  | 8.97E-11 | 0.002609 |
| 8Mar2011- | 5591  | 741.39  | -17.2291 | 2 K.QKSNWH chr5@1229     | 6.61E-11 | 0.001598 |
| 8Mar2011- | 5590  | 494.59  | -21.6808 | 3 K.FPENRHI chr2@1477    | 3.92E-10 | 0.00985  |
| 8Mar2011- | 9573  | 509.3   | -20.473  | 2 R.SSVIMLIV chr2@5767   | 3.16E-10 | 0.00879  |
| 8Mar2011- | 14275 | 1004.97 | -14.712  | 2 K.KVELALV Splice@chr   | 1.16E-22 | 0        |
| 8Mar2011- | 13898 | 1153.23 | -17.5731 | 3 F.EGIRTGG Splice@chr   | 5.18E-14 | 0        |
| 8Mar2011- | 13069 | 607     | -9.70672 | 3 I.NRFNISK chrX@1250    | 1.25E-10 | 0.003839 |
| 8Mar2011- | 15464 | 885.99  | -21.0799 | 2 K.DKKDRKN chr3@1208    | 3.01E-10 | 0.008456 |
| 8Mar2011- | 3015  | 915.47  | 1.201399 | 1 K.FHEIGGQ chrX@4727    | 1.30E-10 | 0.004213 |
| 8Mar2011- | 17206 | 895.78  | -1.06827 | 3 _..RELTEEDI Splice@chr | 1.05E-10 | 0.003226 |
| 8Mar2011- | 18687 | 996.87  | -23.3576 | 3 S.VPFSK+14 Splice@chr  | 1.07E-10 | 0.003226 |
| 8Mar2011- | 19165 | 688.75  | 8.895763 | 5 R.FQSAAIG Splice@chr   | 8.23E-11 | 0.002228 |
| 8Mar2011- | 16928 | 1104.83 | 4.296498 | 3 S.EDLGSDA Splice@chr   | 7.12E-15 | 0        |
| 8Mar2011- | 17830 | 634.84  | 6.410455 | 2 R.VDIGDILF Splice@chr  | 3.11E-11 | 8.26E-04 |
| 8Mar2011- | 19181 | 688.75  | 8.895763 | 5 R.FQSAAIG Splice@chr   | 5.70E-13 | 0        |
| 8Mar2011- | 12372 | 762.93  | 7.897192 | 2 K.CSKNSQII chr5@3746   | 3.40E-10 | 0.009228 |
| 8Mar2011- | 5489  | 703.37  | 25.69944 | 2 _..WPPFHIN chr5@1069   | 3.28E-10 | 0.009011 |
| 8Mar2011- | 12474 | 1156.89 | 7.624255 | 3 _..HTGPGVI Splice@chr  | 1.72E-13 | 0        |
| 8Mar2011- | 2342  | 756.39  | 1.131206 | 2 K.KTAEHVE chr5@1002    | 1.61E-13 | 0        |
| 8Mar2011- | 11776 | 1156.9  | 16.3571  | 3 _..HTGPGVI Splice@chr  | 6.19E-16 | 0        |
| 8Mar2011- | 6219  | 748.39  | -27.6021 | 2 K.QKSNWH chr5@1229     | 1.62E-11 | 2.87E-04 |
| 8Mar2011- | 3150  | 741.39  | -17.2291 | 2 K.QKSNWH chr5@1229     | 2.99E-11 | 8.58E-04 |
| 8Mar2011- | 13053 | 722.45  | -4.95112 | 2 R.RK+14.01 Splice@chr  | 4.25E-10 | 0.009069 |
| 8Mar2011- | 2953  | 741.39  | -17.2291 | 2 K.QKSNWH chr5@1229     | 9.40E-11 | 0.002379 |
| 8Mar2011- | 16648 | 1060.54 | -6.74128 | 3 K.SGTIFDNI Splice@chr  | 7.33E-11 | 0.001628 |
| 8Mar2011- | 12072 | 965.77  | 16.46969 | 4 R.KTSSCQK chr5@2085    | 4.30E-11 | 0.00112  |
| 8Mar2011- | 11245 | 938.46  | 22.50833 | 2 R.ECSQSDS chr2@8876    | 6.32E-11 | 0.001363 |
| 8Mar2011- | 17484 | 783.75  | 7.307848 | 3 K.INWAVTI chr4@2890    | 1.54E-14 | 0        |
| 8Mar2011- | 13714 | 732.07  | 19.51873 | 3 R.ATDDWII Splice@chr   | 2.66E-10 | 0.005272 |
| 8Mar2011- | 16669 | 795.65  | -15.5001 | 4 K.SGTIFDNI Splice@chr  | 1.66E-14 | 0        |
| 8Mar2011- | 3342  | 626.3   | -9.76097 | 2 R.LCESGAA Splice@chr   | 4.19E-16 | 0        |
| 8Mar2011- | 4993  | 533.82  | 16.26677 | 2 K.TNIYTILTI chr5@1329  | 2.75E-10 | 0.005759 |
| 8Mar2011- | 9012  | 671.37  | -24.0361 | 2 T.FNIVHTQ Splice@chr   | 2.44E-10 | 0.005027 |

|           |       |         |          |                          |          |          |
|-----------|-------|---------|----------|--------------------------|----------|----------|
| 8Mar2011- | 3508  | 626.8   | -12.4435 | 2 R.LCESGAA Splice@chr   | 1.28E-15 | 0        |
| 8Mar2011- | 16992 | 688.75  | 8.895763 | 5 R.FQSAAIG Splice@chr   | 7.03E-12 | 1.54E-04 |
| 8Mar2011- | 2634  | 741.39  | -17.2291 | 2 K.QKSNWH chr5@1229     | 1.81E-10 | 0.003854 |
| 8Mar2011- | 9465  | 1156.56 | 11.5499  | 3 _ .HTGPGVI Splice@chr  | 1.99E-13 | 0        |
| 8Mar2011- | 2846  | 741.39  | -17.2291 | 2 K.QKSNWH chr5@1229     | 5.28E-11 | 0.001238 |
| 8Mar2011- | 11114 | 858.48  | 6.006088 | 3 _ .LETGIKPI Splice@chr | 1.76E-14 | 0        |
| 8Mar2011- | 11064 | 858.48  | 6.006088 | 3 _ .LETGIKPI Splice@chr | 1.74E-13 | 0        |
| 8Mar2011- | 12127 | 1056.56 | 28.0642  | 3 I.SRVEDDS Splice@chr   | 2.63E-15 | 0        |
| 8Mar2011- | 14986 | 895.78  | -1.06827 | 3 _ .RELTEEDI Splice@chr | 1.28E-11 | 5.96E-04 |
| 8Mar2011- | 3204  | 741.89  | -19.4947 | 2 K.QKSNWH chr5@1229     | 6.10E-11 | 0.001363 |
| 8Mar2011- | 14654 | 895.78  | -1.06827 | 3 _ .RELTEEDI Splice@chr | 3.06E-12 | 0        |
| 8Mar2011- | 6165  | 695.42  | -0.61526 | 1 R.GAGIHIK. chrX@7403   | 4.79E-10 | 0.009879 |
| 8Mar2011- | 9568  | 881.92  | -2.80647 | 2 F.LQEQGTY Splice@chr   | 3.93E-11 | 9.84E-04 |
| 8Mar2011- | 3260  | 741.39  | -17.2291 | 2 K.QKSNWH chr5@1229     | 1.29E-11 | 5.96E-04 |
| 8Mar2011- | 17607 | 1040.9  | 3.834672 | 3 E.LFQIIVM chr2@1065    | 4.44E-10 | 0.009171 |
| 8Mar2011- | 5163  | 717.89  | -17.2831 | 2 K.LRGWNK chr3@8881     | 3.20E-10 | 0.006589 |
| 8Mar2011- | 4691  | 458.27  | 25.05788 | 2 _ .NGGGDLI chr2@1093   | 2.86E-10 | 0.005871 |
| 8Mar2011- | 11642 | 1153.23 | -17.5731 | 3 F.EGIRTGG Splice@chr   | 3.89E-14 | 0        |
| 8Mar2011- | 2715  | 501.25  | -20.6805 | 2 _ .QNGNVQ Splice@chr   | 2.20E-10 | 0.004561 |
| 8Mar2011- | 9122  | 682.83  | -14.1076 | 2 P.LSSWNV Splice@chr    | 1.19E-10 | 0.002501 |
| 8Mar2011- | 2736  | 741.39  | -17.2291 | 2 K.QKSNWH chr5@1229     | 3.90E-11 | 9.84E-04 |
| 8Mar2011- | 14528 | 987.5   | -5.85708 | 3 K.KYLFLDNI chr4@1288   | 7.14E-11 | 0.001628 |
| 8Mar2011- | 15869 | 930.16  | -8.84605 | 3 E.SEYSTFV1 chr4@3265   | 4.77E-10 | 0.009879 |
| 8Mar2011- | 9444  | 694.54  | 11.7794  | 5 _ .HTGPGVI Splice@chr  | 3.49E-10 | 0.006814 |
| 8Mar2011- | 15652 | 634.84  | 6.410455 | 2 R.VDIGDILF Splice@chr  | 1.12E-12 | 0        |
| 8Mar2011- | 10016 | 1156.89 | 7.624255 | 3 _ .HTGPGVI Splice@chr  | 5.18E-13 | 0        |
| 8Mar2011- | 2791  | 741.39  | -17.2291 | 2 K.QKSNWH chr5@1229     | 3.25E-11 | 8.58E-04 |
| 8Mar2011- | 15025 | 895.78  | -1.06827 | 3 _ .RELTEEDI Splice@chr | 9.55E-13 | 0        |
| 8Mar2011- | 13106 | 848.97  | 0.791766 | 2 R.LLELAPT chr2@6685    | 2.24E-18 | 0        |
| 8Mar2011- | 12750 | 747.39  | 13.7081  | 2 K.MLRFNEC chr2@8355    | 4.39E-10 | 0.009171 |
| 8Mar2011- | 6264  | 725.88  | 19.33943 | 2 R.MEHLCRI Splice@chr   | 1.50E-10 | 0.003497 |
| 8Mar2011- | 17485 | 1175.12 | 6.371728 | 2 K.INWAVTI chr4@2890    | 6.26E-22 | 0        |
| 8Mar2011- | 3612  | 748.39  | -27.6021 | 2 K.QKSNWH chr5@1229     | 5.32E-11 | 0.001238 |
| 8Mar2011- | 10891 | 855.41  | -22.1447 | 2 _ .HVQEVAI Splice@chr  | 1.62E-10 | 0.003615 |
| 8Mar2011- | 4558  | 434.24  | 13.9946  | 3 _ .RSNDQTI chr5@6378   | 4.33E-10 | 0.009171 |
| 8Mar2011- | 16162 | 1060.54 | -6.74128 | 3 K.SGTIFDNI Splice@chr  | 2.17E-14 | 0        |
| 8Mar2011- | 4714  | 533.82  | 16.26677 | 2 K.TNIYTILTI chr5@1329  | 1.88E-10 | 0.004101 |
| 8Mar2011- | 10757 | 607     | -9.70672 | 3 I.NRFNISK chrX@1250    | 8.67E-11 | 0.002011 |
| 8Mar2011- | 15690 | 634.84  | 6.410455 | 2 R.VDIGDILF Splice@chr  | 4.27E-13 | 0        |
| 8Mar2011- | 9525  | 1156.56 | 11.5499  | 3 _ .HTGPGVI Splice@chr  | 1.63E-15 | 0        |
| 8Mar2011- | 16291 | 772.74  | 10.26062 | 3 Q.DPVEDG Splice@chr    | 5.52E-16 | 0        |
| 8Mar2011- | 17274 | 960.49  | -5.15365 | 3 N.GFEPRLA Splice@chr   | 2.12E-10 | 0.004561 |
| 8Mar2011- | 2900  | 741.39  | -17.2291 | 2 K.QKSNWH chr5@1229     | 5.35E-11 | 0.001238 |
| 8Mar2011- | 10730 | 1120.58 | -23.7686 | 2 T.RFNNTI chr2@1312     | 2.27E-10 | 0.004671 |
| 8Mar2011- | 2682  | 741.39  | -17.2291 | 2 K.QKSNWH chr5@1229     | 6.07E-11 | 0.001363 |
| 8Mar2011- | 8030  | 1162.23 | 14.80982 | 3 _ .HTGPGVI Splice@chr  | 4.08E-14 | 0        |
| 8Mar2011- | 3434  | 626.3   | -9.76097 | 2 R.LCESGAA Splice@chr   | 3.71E-16 | 0        |

|           |       |         |          |                         |          |          |
|-----------|-------|---------|----------|-------------------------|----------|----------|
| 8Mar2011- | 3564  | 748.39  | -27.6021 | 2 K.QKSNWH chr5@1229    | 6.51E-11 | 0.001363 |
| 8Mar2011- | 3170  | 936.48  | 27.86052 | 1 K.LNGGYEC chr2@1191   | 5.27E-11 | 0.001238 |
| 8Mar2011- | 9089  | 509.3   | -20.473  | 2 R.SSVIMLIV chr2@5767  | 2.46E-10 | 0.006047 |
| 8Mar2011- | 5553  | 626.3   | -9.76097 | 2 R.LCESGAA Splice@chr  | 4.02E-16 | 0        |
| 8Mar2011- | 2793  | 458.24  | 3.604198 | 2 K.FHEIGGQ chrX@4727   | 3.68E-10 | 0.008495 |
| 8Mar2011- | 5053  | 494.59  | -21.6808 | 3 K.FPENRHL chr2@1477   | 4.02E-10 | 0.009986 |
| 8Mar2011- | 12644 | 855.91  | -24.1079 | 2 _HVQEVAI Splice@chr   | 1.34E-14 | 0        |
| 8Mar2011- | 167   | 420.72  | 12.72454 | 2 _RYTDTGK chr1@7224    | 3.70E-10 | 0.008495 |
| 8Mar2011- | 17895 | 795.66  | -10.8901 | 4 K.SGTIFDNI Splice@chr | 2.96E-13 | 0        |
| 8Mar2011- | 17444 | 634.84  | 6.410455 | 2 R.VDIGDILF Splice@chr | 5.30E-12 | 0        |
| 8Mar2011- | 6349  | 693.87  | -6.6949  | 2 V.ICVAVGD chr5@1065   | 3.24E-10 | 0.007368 |
| 8Mar2011- | 7276  | 1025.62 | -1.90621 | 1 K.LGLGSGL chr5@4945   | 3.69E-11 | 8.23E-04 |
| 8Mar2011- | 5658  | 626.8   | -12.4435 | 2 R.LCESGAA Splice@chr  | 1.31E-15 | 0        |
| 8Mar2011- | 15985 | 940.45  | -9.06687 | 2 L.K+14.016 chr3@1105  | 3.56E-10 | 0.008281 |
| 8Mar2011- | 17939 | 795.66  | -2.97654 | 4 K.SGTIFDNI Splice@chr | 1.92E-13 | 0        |
| 8Mar2011- | 11284 | 1156.56 | 11.5499  | 3 _HTGPGVI Splice@chr   | 2.58E-13 | 0        |
| 8Mar2011- | 5417  | 741.89  | -19.4947 | 2 K.QKSNWH chr5@1229    | 1.08E-11 | 0        |
| 8Mar2011- | 12184 | 944.96  | -18.9448 | 2 _ILCSTDVS Splice@chr  | 9.25E-12 | 0        |
| 8Mar2011- | 14720 | 1108.93 | -3.30537 | 3 F.PETHVLA chr5@6495   | 2.29E-10 | 0.005474 |
| 8Mar2011- | 16727 | 895.78  | -1.06827 | 3 _RELTEEDI Splice@chr  | 1.13E-10 | 0.002543 |
| 8Mar2011- | 10959 | 682.33  | -11.6457 | 2 P.LSSWNVF Splice@chr  | 3.79E-10 | 0.009188 |
| 8Mar2011- | 16103 | 665.37  | -26.6417 | 2 Q.INNK+14 Splice@chr  | 3.54E-10 | 0.008281 |
| 8Mar2011- | 16196 | 987.51  | 4.289691 | 3 K.KYLFLDNI chr4@1288  | 2.28E-10 | 0.005474 |
| 8Mar2011- | 9608  | 663.85  | -5.06443 | 2 N.KMIFSMI chr4@8622   | 2.23E-10 | 0.005357 |
| 8Mar2011- | 19355 | 1040.89 | -5.8694  | 3 E.LFQIIVM chr2@1065   | 3.32E-11 | 5.54E-04 |
| 8Mar2011- | 10007 | 1075.06 | -6.79295 | 2 R.TCSK+14. chr2@1255  | 2.58E-10 | 0.006149 |
| 8Mar2011- | 5765  | 748.4   | -14.2094 | 2 K.QKSNWH chr5@1229    | 1.16E-11 | 0        |
| 8Mar2011- | 3616  | 454.23  | -12.7934 | 2 K.QFTGTPT chrX@5751   | 3.93E-10 | 0.009517 |
| 8Mar2011- | 12536 | 607     | -9.70672 | 3 I.NRFNISK chrX@1250   | 1.26E-10 | 0.002914 |
| 8Mar2011- | 17398 | 634.84  | 6.410455 | 2 R.VDIGDILF Splice@chr | 2.40E-13 | 0        |
| 8Mar2011- | 13132 | 780.03  | -24.5321 | 3 ?.AQDNYM Splice@chr   | 2.61E-12 | 0        |
| 8Mar2011- | 2091  | 446.77  | 19.99118 | 2 R.PVFSITTK chrX@1588  | 2.39E-10 | 0.0057   |
| 8Mar2011- | 6030  | 617.33  | 16.27136 | 1 R.NVGGGG Splice@chr   | 1.81E-10 | 0.004447 |
| 8Mar2011- | 15498 | 942.52  | -15.234  | 2 R.FHITSQSI Splice@chr | 2.52E-10 | 0.006149 |
| 8Mar2011- | 10331 | 657.04  | -26.9179 | 3 R.GNVRK+1 chrX@7490   | 8.22E-11 | 0.002087 |
| 8Mar2011- | 5064  | 741.39  | -17.2291 | 2 K.QKSNWH chr5@1229    | 5.14E-11 | 0.001076 |
| 8Mar2011- | 12961 | 664.7   | 1.197202 | 3 _PTLNK+1. chr1@6526   | 1.59E-10 | 0.00387  |
| 8Mar2011- | 5007  | 741.39  | -17.2291 | 2 K.QKSNWH chr5@1229    | 3.52E-11 | 6.91E-04 |
| 8Mar2011- | 2534  | 915.47  | 1.201399 | 1 K.FHEIGGQ chrX@4727   | 3.20E-11 | 5.54E-04 |
| 8Mar2011- | 5362  | 741.39  | -17.2291 | 2 K.QKSNWH chr5@1229    | 1.49E-11 | 0        |
| 8Mar2011- | 6406  | 693.87  | -6.6949  | 2 V.ICVAVGD chr5@1065   | 2.21E-10 | 0.005357 |
| 8Mar2011- | 17416 | 805.47  | -13.7324 | 2 K.TPIFIPAP chr5@1861  | 5.03E-11 | 9.46E-04 |
| 8Mar2011- | 1281  | 416.22  | -8.0358  | 3 R.VETFPVD chr1@1716   | 7.80E-11 | 0.001961 |
| 8Mar2011- | 4952  | 741.39  | -17.2291 | 2 K.QKSNWH chr5@1229    | 3.84E-11 | 8.23E-04 |
| 8Mar2011- | 6987  | 534.32  | 13.11853 | 2 K.TNIYTILTI chr5@1329 | 3.61E-10 | 0.008495 |
| 8Mar2011- | 6831  | 895.51  | -6.04083 | 2 _SGISIEVN Splice@chr  | 2.56E-10 | 0.006149 |
| 8Mar2011- | 13564 | 1153.23 | -17.5731 | 3 F.EGIRTGG Splice@chr  | 1.69E-11 | 0        |

|           |       |         |          |                         |          |          |
|-----------|-------|---------|----------|-------------------------|----------|----------|
| 8Mar2011- | 16234 | 987.51  | 4.289691 | 3 K.KYLFLDNI chr4@1288  | 1.18E-10 | 0.002543 |
| 8Mar2011- | 9955  | 1075.06 | -6.79295 | 2 R.TCSK+14. chr2@1255  | 1.99E-10 | 0.004919 |
| 8Mar2011- | 14030 | 888.47  | 22.8338  | 2 K.DITLEVEA Splice@chr | 1.93E-12 | 0        |
| 8Mar2011- | 17638 | 980.48  | -7.04314 | 3 K.SGTIFDNI Splice@chr | 1.73E-11 | 1.41E-04 |
| 8Mar2011- | 16866 | 1013.54 | -22.3432 | 3 K.ACLNVTY chr4@4860   | 1.12E-10 | 0.002543 |
| 8Mar2011- | 19238 | 783.75  | 7.307848 | 3 K.INWAVTI chr4@2890   | 3.17E-14 | 0        |
| 8Mar2011- | 14376 | 829.44  | 22.15469 | 2 R.FADLPFA chr2@1282   | 1.26E-10 | 0.002914 |
| 8Mar2011- | 674   | 425.23  | 12.96682 | 2 K.HLNEHAk chr5@5137   | 3.36E-10 | 0.007711 |
| 8Mar2011- | 16352 | 895.78  | -1.06827 | 3 _RELTEEDI Splice@chr  | 1.04E-11 | 0        |
| 8Mar2011- | 19068 | 828.39  | -8.00743 | 2 K.PNLK+14 chr2@3862   | 1.04E-10 | 0.002543 |
| 8Mar2011- | 17064 | 918.45  | 1.886417 | 3 K.M+15.99 chr5@1445   | 2.86E-10 | 0.006469 |
| 8Mar2011- | 11345 | 881.92  | -2.80647 | 2 F.LQEQGTY Splice@chr  | 9.45E-12 | 0        |
| 8Mar2011- | 14921 | 669.36  | -13.2955 | 2 K.LEFNISKk chr1@1931  | 1.16E-11 | 0        |
| 8Mar2011- | 5307  | 741.39  | -17.2291 | 2 K.QKSNWH chr5@1229    | 1.56E-11 | 0        |
| 8Mar2011- | 10744 | 671.37  | -24.0361 | 2 T.FNIVHTQ Splice@chr  | 3.54E-10 | 0.007344 |
| 8Mar2011- | 2342  | 533.26  | 4.128259 | 2 G.FGGGGIS chr2@5085   | 1.51E-10 | 0.003753 |
| 8Mar2011- | 14635 | 1165.62 | 10.51339 | 2 Q.VCSKGRk Splice@chr  | 9.02E-11 | 0.002272 |
| 8Mar2011- | 19694 | 931.5   | -18.9783 | 3 K.MQNLDL Splice@chr   | 3.71E-11 | 9.45E-04 |
| 8Mar2011- | 4626  | 741.39  | -17.2291 | 2 K.QKSNWH chr5@1229    | 3.25E-11 | 8.45E-04 |
| 8Mar2011- | 5338  | 748.4   | -14.2094 | 2 K.QKSNWH chr5@1229    | 3.47E-11 | 8.45E-04 |
| 8Mar2011- | 16573 | 840.45  | 15.70543 | 2 K.FANRQIA chr2@4290   | 3.17E-10 | 0.006431 |
| 8Mar2011- | 14424 | 983.96  | -5.49698 | 2 R.SFSTIPDS chr2@1305  | 3.84E-13 | 0        |
| 8Mar2011- | 6836  | 717.89  | -17.2831 | 2 K.LRGWNK chr3@8881    | 4.78E-10 | 0.009694 |
| 8Mar2011- | 19719 | 860.69  | 14.08015 | 4 R.FQSAAIG Splice@chr  | 1.20E-12 | 0        |
| 8Mar2011- | 10722 | 562.79  | -28.8684 | 2 K.LYPVGAP Splice@chr  | 1.04E-10 | 0.002489 |
| 8Mar2011- | 6544  | 534.32  | 13.11853 | 2 K.TNIYTILTI chr5@1329 | 2.94E-10 | 0.005618 |
| 8Mar2011- | 16651 | 665.37  | -26.6417 | 2 Q.INNK+14 Splice@chr  | 3.99E-10 | 0.008537 |
| 8Mar2011- | 366   | 530.31  | 5.53503  | 2 R.RIFTAAQ chr1@1130   | 1.23E-10 | 0.003026 |
| 8Mar2011- | 5016  | 741.39  | -17.2291 | 2 K.QKSNWH chr5@1229    | 5.94E-11 | 0.001403 |
| 8Mar2011- | 4574  | 741.39  | -17.2291 | 2 K.QKSNWH chr5@1229    | 4.46E-11 | 9.45E-04 |
| 8Mar2011- | 4487  | 439.76  | 15.37198 | 2 K.LYGEVGL chrX@2908   | 1.44E-10 | 0.003646 |
| 8Mar2011- | 13619 | 622.34  | 25.711   | 2 R.AK+14.01 chr2@4270  | 1.68E-10 | 0.003833 |
| 8Mar2011- | 9462  | 663.85  | -5.06443 | 2 N.KMIFSMI chr4@8622   | 4.66E-10 | 0.009504 |
| 8Mar2011- | 19614 | 985.55  | -18.1844 | 3 R.K+14.016 chrX@1171  | 3.41E-10 | 0.007143 |
| 8Mar2011- | 12498 | 713.38  | -5.25494 | 3 _DVGAILV Splice@chr   | 3.44E-11 | 8.45E-04 |
| 8Mar2011- | 14167 | 1005.48 | -6.41263 | 2 K.KVELALV Splice@chr  | 1.24E-22 | 0        |
| 8Mar2011- | 13876 | 563.87  | -6.34728 | 2 R.QNK+14. Splice@chr  | 9.98E-11 | 0.002272 |
| 8Mar2011- | 11799 | 867.92  | 8.25809  | 4 _HTGPGVI Splice@chr   | 3.92E-11 | 9.45E-04 |
| 8Mar2011- | 9626  | 701.38  | -29.6051 | 2 F.DKNIWNI chr5@6029   | 3.22E-10 | 0.006528 |
| 8Mar2011- | 7681  | 438.91  | -18.0263 | 3 _KNDKKTk chr2@4168    | 1.60E-10 | 0.003833 |
| 8Mar2011- | 5274  | 1047.56 | 1.283047 | 1 _SWVSTNk Splice@chr   | 3.20E-10 | 0.006431 |
| 8Mar2011- | 4684  | 741.39  | -17.2291 | 2 K.QKSNWH chr5@1229    | 4.24E-11 | 9.45E-04 |
| 8Mar2011- | 11360 | 694.54  | 11.7794  | 5 _HTGPGVI Splice@chr   | 1.38E-10 | 0.003545 |
| 8Mar2011- | 11366 | 1156.9  | 16.3571  | 3 _HTGPGVI Splice@chr   | 5.69E-15 | 0        |
| 8Mar2011- | 15867 | 913     | 7.629518 | 2 F.TEMPLGC chrX@9861   | 3.43E-10 | 0.007246 |
| 8Mar2011- | 17367 | 1007.86 | 15.19559 | 3 R.CWNRRA Splice@chr   | 9.57E-12 | 3.93E-04 |
| 8Mar2011- | 16805 | 987.51  | 4.289691 | 3 K.KYLFLDNI chr4@1288  | 8.55E-11 | 0.002272 |

|           |       |         |          |                         |          |          |
|-----------|-------|---------|----------|-------------------------|----------|----------|
| 8Mar2011- | 17512 | 1013.54 | -22.3432 | 3 K.ACLNVTY chr4@4860   | 1.47E-10 | 0.003646 |
| 8Mar2011- | 12917 | 1030.52 | 12.84278 | 2 L.SPIEVPC Splice@chr  | 9.00E-19 | 0        |
| 8Mar2011- | 10535 | 827.77  | -14.6467 | 3 K.NNRKHTI chr5@2125   | 2.15E-10 | 0.004314 |
| 8Mar2011- | 17412 | 1007.86 | 15.19559 | 3 R.CWNRRA Splice@chr   | 1.16E-12 | 0        |
| 8Mar2011- | 6067  | 693.87  | -6.6949  | 2 V.ICVAVGD chr5@1065   | 1.97E-10 | 0.003904 |
| 8Mar2011- | 14158 | 965.77  | 16.46969 | 4 R.KTSSCQK chr5@2085   | 5.70E-11 | 0.001286 |
| 8Mar2011- | 13748 | 1153.23 | -17.5731 | 3 F.EGIRTGG Splice@chr  | 1.61E-12 | 0        |
| 8Mar2011- | 14488 | 602.99  | -24.0627 | 3 _QVETILFI chr3@1065   | 3.16E-10 | 0.006431 |
| 8Mar2011- | 18086 | 634.84  | 6.410455 | 2 R.VDIGDILF Splice@chr | 1.18E-12 | 0        |
| 8Mar2011- | 4897  | 407.74  | 5.852463 | 2 R.ASDIAPIK chrX@1795  | 9.02E-11 | 0.002272 |
| 8Mar2011- | 9940  | 1075.06 | -6.79295 | 2 R.TCSK+14. chr2@1255  | 1.29E-10 | 0.003235 |
| 8Mar2011- | 8671  | 1137.65 | -15.1425 | 1 Q.FLVISFA\ chrX@1232  | 2.70E-10 | 0.005304 |
| 8Mar2011- | 13696 | 1153.23 | -17.5731 | 3 F.EGIRTGG Splice@chr  | 2.12E-13 | 0        |
| 8Mar2011- | 9888  | 1075.06 | -6.79295 | 2 R.TCSK+14. chr2@1255  | 1.30E-10 | 0.003235 |
| 8Mar2011- | 12848 | 833.94  | 2.824179 | 2 _IIEPYVAV Splice@chr  | 2.04E-10 | 0.00401  |
| 8Mar2011- | 6509  | 870.51  | 4.219085 | 1 K.IQKMPPF chrX@1225   | 4.73E-10 | 0.009694 |
| 8Mar2011- | 15808 | 913     | 7.629518 | 2 F.TEMPLGC chrX@9861   | 8.61E-12 | 2.65E-04 |
| 8Mar2011- | 2787  | 404.54  | 22.99087 | 3 R.CAPSKST chr1@3565   | 2.44E-10 | 0.004929 |
| 8Mar2011- | 6944  | 1025.62 | -1.90621 | 1 K.LGLGSGL chr5@4945   | 5.68E-12 | 2.65E-04 |
| 8Mar2011- | 19723 | 688.75  | 8.895763 | 5 R.FQSAAIG Splice@chr  | 1.83E-10 | 0.003904 |
| 8Mar2011- | 15677 | 1187.58 | 10.28775 | 3 R.NGAPPS\ Splice@chr  | 1.73E-10 | 0.003904 |
| 8Mar2011- | 18104 | 805.47  | -13.7324 | 2 K.TPIFIPAP\ chr5@1861 | 2.31E-10 | 0.004731 |
| 8Mar2011- | 9491  | 897.42  | -27.6753 | 3 _QVREMH Splice@chr    | 4.70E-10 | 0.009602 |
| 8Mar2011- | 1641  | 915.48  | 12.14748 | 1 K.FHEIGGQ chrX@4727   | 1.34E-10 | 0.003342 |
| 8Mar2011- | 3163  | 519.79  | 5.478159 | 2 K.SIYGLEIS\ chr1@4967 | 4.63E-10 | 0.009504 |
| 8Mar2011- | 20427 | 1175.12 | 6.371728 | 2 K.INWAVTI chr4@2890   | 2.46E-18 | 0        |
| 8Mar2011- | 6486  | 533.82  | 16.26677 | 2 K.TNIYTILTI chr5@1325 | 3.07E-10 | 0.00603  |
| 8Mar2011- | 17137 | 1047.89 | 8.084587 | 3 K.NAQTLKF chr2@1286   | 4.50E-11 | 9.45E-04 |
| 8Mar2011- | 10855 | 708.39  | 18.26369 | 2 R.EQLDQGI Splice@chr  | 2.98E-10 | 0.00572  |
| 8Mar2011- | 17309 | 895.79  | 10.03186 | 3 _RELTEEDI Splice@chr  | 6.33E-12 | 2.65E-04 |
| 8Mar2011- | 5636  | 617.33  | 16.27136 | 1 R.NVGGGG Splice@chr   | 1.81E-10 | 0.003904 |
| 8Mar2011- | 8957  | 509.3   | -20.473  | 2 R.SSVIMLIV chr2@5767  | 3.67E-10 | 0.007745 |
| 8Mar2011- | 16462 | 746.91  | 13.99266 | 2 V.EK+14.01 Splice@chr | 1.66E-11 | 6.28E-04 |
| 8Mar2011- | 19212 | 959.04  | 19.81385 | 2 Y.NNCKLNS chrX@1250   | 1.32E-10 | 0.003342 |
| 8Mar2011- | 16874 | 895.78  | -1.06827 | 3 _RELTEEDI Splice@chr  | 2.84E-11 | 8.45E-04 |
| 8Mar2011- | 9771  | 1162.23 | 14.80982 | 3 _HTGPGVI Splice@chr   | 3.02E-13 | 0        |
| 8Mar2011- | 10406 | 520.78  | 10.0988  | 2 _KFEVNFE chrX@6145    | 1.85E-10 | 0.003904 |
| 8Mar2011- | 11950 | 556.86  | -10.3839 | 2 R.QNKIVLI\ Splice@chr | 2.35E-10 | 0.00483  |
| 8Mar2011- | 13081 | 858.48  | 6.006088 | 3 _LETGIKPI Splice@chr  | 3.72E-15 | 0        |
| 8Mar2011- | 4924  | 741.39  | -17.2291 | 2 K.QKSNWH chr5@1225    | 2.14E-11 | 7.46E-04 |
| 8Mar2011- | 17349 | 895.79  | 10.03186 | 3 _RELTEEDI Splice@chr  | 4.52E-12 | 2.65E-04 |
| 8Mar2011- | 10849 | 671.37  | -24.0361 | 2 T.FNIVHTQ Splice@chr  | 4.24E-10 | 0.008808 |
| 8Mar2011- | 12945 | 604.32  | 3.237348 | 2 R.NDLSTSS\ chr5@1474  | 4.57E-10 | 0.00941  |
| 8Mar2011- | 13022 | 858.48  | 6.006088 | 3 _LETGIKPI Splice@chr  | 6.81E-14 | 0        |
| 8Mar2011- | 13146 | 858.48  | 6.006088 | 3 _LETGIKPI Splice@chr  | 9.69E-11 | 0.002272 |
| 8Mar2011- | 12343 | 838.94  | -22.1914 | 2 R.QFADLPS chr5@1898   | 2.52E-10 | 0.005022 |
| 8Mar2011- | 18042 | 634.84  | 6.410455 | 2 R.VDIGDILF Splice@chr | 5.30E-13 | 0        |

|           |       |         |          |                         |          |          |
|-----------|-------|---------|----------|-------------------------|----------|----------|
| 8Mar2011- | 18059 | 805.47  | -13.7324 | 2 K.TPIFIPAP' chr5@1861 | 3.87E-11 | 9.45E-04 |
| 8Mar2011- | 9767  | 697.74  | 13.19746 | 5 _..HTGPGVI Splice@chr | 2.32E-10 | 0.004731 |
| 8Mar2011- | 5203  | 741.39  | -17.2291 | 2 K.QKSNWH chr5@1229    | 2.74E-11 | 4.92E-04 |
| 8Mar2011- | 21284 | 726.39  | 23.76446 | 1 _..AAPSSHR chr2@1174  | 4.16E-10 | 0.007913 |
| 8Mar2011- | 16893 | 665.37  | -26.6417 | 2 Q.INNK+14 Splice@chr  | 2.53E-10 | 0.004723 |
| 8Mar2011- | 5572  | 741.39  | -17.2291 | 2 K.QKSNWH chr5@1229    | 5.72E-11 | 8.22E-04 |
| 8Mar2011- | 9860  | 663.85  | -5.06443 | 2 N.KMIFSMI chr4@8622   | 3.09E-10 | 0.006261 |
| 8Mar2011- | 18270 | 634.84  | 6.410455 | 2 R.VDIGDILF Splice@chr | 9.06E-13 | 0        |
| 8Mar2011- | 10778 | 520.78  | 10.0988  | 2 _..KFEVNFE chrX@6149  | 4.04E-10 | 0.007417 |
| 8Mar2011- | 11275 | 708.39  | -26.2033 | 2 F.DK+14.01 chr5@6029  | 3.88E-10 | 0.007322 |
| 8Mar2011- | 18310 | 634.84  | 6.410455 | 2 R.VDIGDILF Splice@chr | 1.00E-12 | 0        |
| 8Mar2011- | 16827 | 985.55  | 25.29396 | 2 R.FADLSEIS chr1@1496  | 3.60E-10 | 0.007233 |
| 8Mar2011- | 17251 | 1003.19 | 17.13413 | 3 R.CWNRRA Splice@chr   | 1.60E-12 | 0        |
| 8Mar2011- | 19805 | 985.55  | -18.1844 | 3 R.K+14.016 chrX@1171  | 4.56E-11 | 8.22E-04 |
| 8Mar2011- | 16128 | 913     | 7.629518 | 2 F.TEMPLGC chrX@9861   | 8.25E-12 | 0        |
| 8Mar2011- | 13977 | 1153.23 | -17.5731 | 3 F.EGIRTGG Splice@chr  | 2.05E-13 | 0        |
| 8Mar2011- | 10369 | 1162.23 | 14.80982 | 3 _..HTGPGVI Splice@chr | 3.00E-12 | 0        |
| 8Mar2011- | 13111 | 855.41  | -22.1447 | 2 _..HVQEVAI Splice@chr | 3.89E-11 | 7.15E-04 |
| 8Mar2011- | 18039 | 934.49  | 27.65836 | 2 R.QFRQSGI chr5@4795   | 3.67E-10 | 0.007233 |
| 8Mar2011- | 13808 | 622.34  | 25.711   | 2 R.AK+14.01 chr2@4270  | 4.82E-11 | 8.22E-04 |
| 8Mar2011- | 4467  | 651.34  | 0.563114 | 2 R.QEDKNG chr1@9829    | 2.33E-10 | 0.003997 |
| 8Mar2011- | 14294 | 965.52  | 17.33925 | 4 R.KTSSCQK chr5@2085   | 3.30E-10 | 0.00698  |
| 8Mar2011- | 12963 | 606.67  | -2.35139 | 3 I.NRFNISK chrX@1250   | 2.01E-10 | 0.003267 |
| 8Mar2011- | 16331 | 1088.02 | -5.70078 | 2 R.SM+15.9 chr4@3924   | 3.43E-10 | 0.007161 |
| 8Mar2011- | 10364 | 1075.06 | -6.79295 | 2 R.TCSK+14. chr2@1255  | 1.41E-10 | 0.002335 |
| 8Mar2011- | 6134  | 617.33  | 16.27136 | 1 R.NVGGGG Splice@chr   | 1.81E-10 | 0.003067 |
| 8Mar2011- | 435   | 422.27  | 2.173301 | 2 K.IGKGEVLI chrX@1204  | 2.03E-10 | 0.003374 |
| 8Mar2011- | 18276 | 805.47  | -13.7324 | 2 K.TPIFIPAP' chr5@1861 | 4.28E-10 | 0.008215 |
| 8Mar2011- | 17981 | 957.5   | 22.57714 | 3 K.LFQVLQN Splice@chr  | 1.10E-10 | 0.002335 |
| 8Mar2011- | 10418 | 1075.06 | -6.79295 | 2 R.TCSK+14. chr2@1255  | 3.36E-10 | 0.007161 |
| 8Mar2011- | 4521  | 439.91  | 17.33685 | 3 K.NSQKNPI chr2@3540   | 4.46E-10 | 0.008597 |
| 8Mar2011- | 3013  | 414.74  | -1.18019 | 2 R.FAAHLA chrX@1289    | 1.98E-10 | 0.003267 |
| 8Mar2011- | 5090  | 741.39  | -17.2291 | 2 K.QKSNWH chr5@1229    | 1.08E-11 | 1.29E-04 |
| 8Mar2011- | 13861 | 622.33  | 9.587405 | 2 R.AK+14.01 chr2@4270  | 7.87E-11 | 0.001383 |
| 8Mar2011- | 3698  | 439.91  | 17.33685 | 3 K.NSQKNPI chr2@3540   | 1.99E-11 | 3.72E-04 |
| 8Mar2011- | 5863  | 748.39  | -27.6021 | 2 K.QKSNWH chr5@1229    | 1.35E-11 | 1.29E-04 |
| 8Mar2011- | 11379 | 671.37  | -24.0361 | 2 T.FNIVHTQ Splice@chr  | 4.47E-10 | 0.008597 |
| 8Mar2011- | 17600 | 1007.86 | 15.19559 | 3 R.CWNRRA Splice@chr   | 1.57E-10 | 0.002763 |
| 8Mar2011- | 5145  | 741.39  | -17.2291 | 2 K.QKSNWH chr5@1229    | 4.90E-11 | 8.22E-04 |
| 8Mar2011- | 7456  | 1025.62 | -1.90621 | 1 K.LGLGSL chr5@4945    | 9.13E-12 | 1.29E-04 |
| 8Mar2011- | 19390 | 959.04  | 19.81385 | 2 Y.NNCKLNS chrX@1250   | 2.42E-10 | 0.004201 |
| 8Mar2011- | 11261 | 671.37  | -24.0361 | 2 T.FNIVHTQ Splice@chr  | 5.07E-10 | 0.00996  |
| 8Mar2011- | 14355 | 1005.47 | -16.3827 | 2 K.KVELALW Splice@chr  | 8.49E-23 | 0        |
| 8Mar2011- | 5472  | 741.39  | -17.2291 | 2 K.QKSNWH chr5@1229    | 1.09E-11 | 1.29E-04 |
| 8Mar2011- | 6646  | 434.24  | 13.9946  | 3 _..RSNDQTI chr5@6378  | 2.75E-10 | 0.005028 |
| 8Mar2011- | 10719 | 657.04  | -26.9179 | 3 R.GNVRK+1 chrX@7490   | 3.94E-10 | 0.007322 |
| 8Mar2011- | 14411 | 1005.47 | -16.3827 | 2 K.KVELALW Splice@chr  | 3.32E-22 | 0        |

|           |       |         |          |                          |          |          |
|-----------|-------|---------|----------|--------------------------|----------|----------|
| 8Mar2011- | 19910 | 1147.25 | 13.44098 | 3 R.FQSAAIG Splice@chr   | 4.38E-16 | 0        |
| 8Mar2011- | 18322 | 805.47  | -13.7324 | 2 K.TPIFIPAP chr5@1861   | 3.98E-10 | 0.007417 |
| 8Mar2011- | 11722 | 1156.9  | 16.3571  | 3 _ .HTGPGVI Splice@chr  | 3.51E-16 | 0        |
| 8Mar2011- | 11781 | 1156.56 | 11.5499  | 3 _ .HTGPGVI Splice@chr  | 4.36E-12 | 0        |
| 8Mar2011- | 17573 | 895.78  | -1.06827 | 3 _ .RELTEEDI Splice@chr | 8.69E-13 | 0        |
| 8Mar2011- | 2018  | 1115.56 | -14.3036 | 1 R.RMPPAA chr2@1507     | 3.65E-10 | 0.007233 |
| 8Mar2011- | 17155 | 895.78  | -1.06827 | 3 _ .RELTEEDI Splice@chr | 1.13E-12 | 0        |
| 8Mar2011- | 18339 | 1028.06 | -8.29308 | 2 K.LFVCVLG chr2@7808    | 3.18E-10 | 0.006568 |
| 8Mar2011- | 4949  | 439.75  | -7.44254 | 2 K.LYGEVGL chrX@2908    | 1.34E-10 | 0.002335 |
| 8Mar2011- | 5043  | 741.39  | -17.2291 | 2 K.QKSNWH chr5@1229     | 2.35E-11 | 3.72E-04 |
| 8Mar2011- | 13064 | 833.94  | 2.824179 | 2 _ .IIEPYVAV Splice@chr | 4.48E-10 | 0.008597 |
| 8Mar2011- | 10769 | 657.04  | -26.9179 | 3 R.GNVRK+1 chrX@7490    | 1.32E-10 | 0.002335 |
| 8Mar2011- | 17429 | 1047.89 | 8.084587 | 3 K.NAQLTKF chr2@1286    | 4.55E-10 | 0.008802 |
| 8Mar2011- | 459   | 565.28  | 11.68208 | 2 _ .RSEFSSNI chr1@1388  | 4.38E-10 | 0.00851  |
| 8Mar2011- | 19735 | 1024.86 | 8.051182 | 3 R.LPVENQ Splice@chr    | 4.27E-17 | 0        |
| 8Mar2011- | 9764  | 512.28  | -21.6995 | 3 K.KVQNHSI chr5@4515    | 9.17E-11 | 0.001596 |
| 8Mar2011- | 7670  | 688.38  | -2.21987 | 1 R.MKGGAP chr5@1820     | 8.79E-11 | 0.001486 |
| 8Mar2011- | 17061 | 987.51  | 4.289691 | 3 K.KYLFLDN chr4@1288    | 4.30E-11 | 7.15E-04 |
| 8Mar2011- | 19113 | 1159.62 | 2.451592 | 2 I.K+14.016 chrX@7012   | 2.64E-10 | 0.004825 |
| 8Mar2011- | 16235 | 732.07  | 19.51873 | 3 R.ATDDWII Splice@chr   | 1.68E-10 | 0.003067 |
| 8Mar2011- | 17203 | 1003.19 | 17.13413 | 3 R.CWNRRRA Splice@chr   | 3.24E-12 | 0        |
| 8Mar2011- | 11317 | 671.37  | -24.0361 | 2 T.FNIVHTQ Splice@chr   | 2.41E-10 | 0.004201 |
| 8Mar2011- | 16943 | 665.37  | -26.6417 | 2 Q.INNK+14 Splice@chr   | 3.86E-10 | 0.007322 |
| 8Mar2011- | 398   | 422.27  | 2.173301 | 2 K.IGKGEVLI chrX@1204   | 3.54E-10 | 0.007161 |
| 8Mar2011- | 19880 | 1147.25 | 13.44098 | 3 R.FQSAAIG Splice@chr   | 2.52E-14 | 0        |
| 8Mar2011- | 1210  | 801.46  | -26.9469 | 1 K.WAGVVL chr4@3669     | 7.32E-11 | 0.001158 |
| 8Mar2011- | 9914  | 663.85  | -5.06443 | 2 N.KMIFSMI chr4@8622    | 2.02E-10 | 0.003374 |
| 8Mar2011- | 19596 | 1074.57 | -22.1531 | 2 K.NYHK+14 chrX@4323    | 2.31E-10 | 0.003893 |
| 8Mar2011- | 17936 | 589.8   | 27.78209 | 2 K.K+14.016 chr5@1235   | 2.69E-11 | 4.92E-04 |
| 8Mar2011- | 17572 | 1003.19 | 17.13413 | 3 R.CWNRRRA Splice@chr   | 7.38E-11 | 0.001158 |
| 8Mar2011- | 13106 | 1004.97 | -14.712  | 2 K.KVELALV Splice@chr   | 1.28E-22 | 0        |
| 8Mar2011- | 3790  | 741.39  | -17.2291 | 2 K.QKSNWH chr5@1229     | 1.56E-11 | 5.25E-04 |
| 8Mar2011- | 19195 | 960.15  | -10.8603 | 3 N.GFEPRLA Splice@chr   | 1.85E-11 | 6.43E-04 |
| 8Mar2011- | 18557 | 1074.57 | -22.1531 | 2 K.NYHK+14 chrX@4323    | 3.59E-11 | 9.99E-04 |
| 8Mar2011- | 11861 | 1030.52 | 12.84278 | 2 L.SPIPEVPC Splice@chr  | 8.31E-18 | 0        |
| 8Mar2011- | 7736  | 1137.65 | -15.1425 | 1 Q.FLVISFA chrX@1232    | 2.42E-10 | 0.004987 |
| 8Mar2011- | 3423  | 741.39  | -17.2291 | 2 K.QKSNWH chr5@1229     | 4.01E-11 | 9.99E-04 |
| 8Mar2011- | 10963 | 762.93  | 7.897192 | 2 K.CSKNSQII chr5@3746   | 2.10E-10 | 0.004464 |
| 8Mar2011- | 13533 | 1165.62 | 10.51339 | 2 Q.VCSKGRE Splice@chr   | 3.18E-10 | 0.006816 |
| 8Mar2011- | 3364  | 741.39  | -17.2291 | 2 K.QKSNWH chr5@1229     | 2.35E-11 | 6.43E-04 |
| 8Mar2011- | 12585 | 622.34  | 25.711   | 2 R.AK+14.01 chr2@4270   | 2.40E-10 | 0.004987 |
| 8Mar2011- | 15585 | 746.91  | 13.99266 | 2 V.EK+14.01 chrX@6709   | 1.59E-11 | 5.25E-04 |
| 8Mar2011- | 14879 | 732.07  | 19.51873 | 3 R.ATDDWII Splice@chr   | 3.11E-10 | 0.006714 |
| 8Mar2011- | 18883 | 860.69  | 14.08015 | 4 R.FQSAAIG Splice@chr   | 4.89E-10 | 0.009476 |
| 8Mar2011- | 10411 | 694.54  | 11.7794  | 5 _ .HTGPGVI Splice@chr  | 2.20E-11 | 6.43E-04 |
| 8Mar2011- | 10414 | 1156.57 | 20.14189 | 3 _ .HTGPGVI Splice@chr  | 1.84E-14 | 0        |
| 8Mar2011- | 10413 | 867.93  | 19.80799 | 4 _ .HTGPGVI Splice@chr  | 1.84E-10 | 0.003908 |

|           |       |         |          |                          |          |          |
|-----------|-------|---------|----------|--------------------------|----------|----------|
| 8Mar2011- | 16031 | 895.78  | -1.06827 | 3 _ .RELTEEDI Splice@chr | 7.26E-12 | 2.70E-04 |
| 8Mar2011- | 9795  | 671.37  | -24.0361 | 2 T.FNIVHTQ Splice@chr   | 4.68E-10 | 0.009182 |
| 8Mar2011- | 19619 | 921     | -9.12591 | 2 K.K+14.016 chr1@137    | 3.43E-10 | 0.007225 |
| 8Mar2011- | 8964  | 1075.06 | -6.79295 | 2 R.TCSK+14. chr2@125    | 1.94E-10 | 0.003908 |
| 8Mar2011- | 10890 | 870.48  | 7.030425 | 1 K.ATTQRHF chr2@697     | 2.04E-10 | 0.004017 |
| 8Mar2011- | 4929  | 464.73  | 11.45108 | 2 R.LFDYENK chrX@536     | 3.81E-10 | 0.007846 |
| 8Mar2011- | 13206 | 983.97  | 4.629411 | 2 R.SFSTIPDS chr2@130    | 1.32E-18 | 0        |
| 8Mar2011- | 3733  | 741.39  | -17.2291 | 2 K.QKSNWH chr5@122      | 1.32E-11 | 5.25E-04 |
| 8Mar2011- | 4084  | 748.4   | -14.2094 | 2 K.QKSNWH chr5@122      | 1.92E-11 | 6.43E-04 |
| 8Mar2011- | 8760  | 1162.23 | 14.80982 | 3 _ .HTGPGVI Splice@chr  | 7.55E-16 | 0        |
| 8Mar2011- | 15608 | 901.48  | -10.8836 | 2 K.QFLTFLT/ chr4@769    | 9.27E-11 | 0.002013 |
| 8Mar2011- | 17207 | 634.84  | 6.410455 | 2 R.VDIGDILF Splice@chr  | 1.63E-12 | 0        |
| 8Mar2011- | 19473 | 783.75  | 7.307848 | 3 K.INWAVTI chr4@289     | 1.24E-14 | 0        |
| 8Mar2011- | 3308  | 741.39  | -17.2291 | 2 K.QKSNWH chr5@122      | 4.37E-11 | 0.00112  |
| 8Mar2011- | 15984 | 895.78  | -1.06827 | 3 _ .RELTEEDI Splice@chr | 8.89E-13 | 0        |
| 8Mar2011- | 5234  | 895.51  | -6.04083 | 2 _ .SGISIEVN Splice@chr | 2.19E-10 | 0.004568 |
| 8Mar2011- | 3146  | 439.76  | 15.37198 | 2 K.LYGEVGL chrX@290     | 1.84E-10 | 0.003908 |
| 8Mar2011- | 14815 | 913     | 7.629518 | 2 F.TEMPLGC chrX@986     | 5.06E-12 | 0        |
| 8Mar2011- | 4137  | 748.4   | -14.2094 | 2 K.QKSNWH chr5@122      | 1.07E-11 | 2.70E-04 |
| 8Mar2011- | 17895 | 909.82  | -3.91826 | 3 Y.FRLQGSIL chrX@950    | 1.20E-10 | 0.002595 |
| 8Mar2011- | 18863 | 688.75  | 8.895763 | 5 R.FQSAAIG Splice@chr   | 1.81E-11 | 6.43E-04 |
| 8Mar2011- | 10782 | 1156.89 | 7.624255 | 3 _ .HTGPGVI Splice@chr  | 4.38E-15 | 0        |
| 8Mar2011- | 16229 | 895.78  | -1.06827 | 3 _ .RELTEEDI Splice@chr | 2.35E-10 | 0.004658 |
| 8Mar2011- | 3478  | 741.39  | -17.2291 | 2 K.QKSNWH chr5@122      | 5.51E-11 | 0.001349 |
| 8Mar2011- | 3667  | 407.74  | 5.852463 | 2 R.ASDIAPIK chrX@179    | 2.59E-10 | 0.005542 |
| 8Mar2011- | 10779 | 867.92  | 8.25809  | 4 _ .HTGPGVI Splice@chr  | 5.25E-11 | 0.001233 |
| 8Mar2011- | 13057 | 1005.47 | -16.3827 | 2 K.KVELALW Splice@chr   | 2.02E-22 | 0        |
| 8Mar2011- | 8231  | 600.99  | -7.79911 | 3 K.QFLTFLT/ chr4@769    | 5.08E-10 | 0.009673 |
| 8Mar2011- | 16492 | 895.78  | -1.06827 | 3 _ .RELTEEDI Splice@chr | 2.76E-10 | 0.005853 |
| 8Mar2011- | 8916  | 1075.06 | -6.79295 | 2 R.TCSK+14. chr2@125    | 3.46E-10 | 0.007225 |
| 8Mar2011- | 13275 | 888.47  | 22.8338  | 2 K.DITLEVEA Splice@chr  | 7.85E-12 | 2.70E-04 |
| 8Mar2011- | 7681  | 1137.65 | -15.1425 | 1 Q.FLVISFA\ chrX@123    | 2.23E-10 | 0.004658 |
| 8Mar2011- | 18822 | 860.69  | 14.08015 | 4 R.FQSAAIG Splice@chr   | 1.29E-14 | 0        |
| 8Mar2011- | 3685  | 741.39  | -17.2291 | 2 K.QKSNWH chr5@122      | 4.43E-11 | 0.00112  |
| 8Mar2011- | 3258  | 741.39  | -17.2291 | 2 K.QKSNWH chr5@122      | 6.87E-11 | 0.001568 |
| 8Mar2011- | 14689 | 937     | -18.3647 | 2 R.NPFLEEV: chr3@109    | 4.08E-11 | 9.99E-04 |
| 8Mar2011- | 14696 | 899.97  | 3.975293 | 2 R.SKNK+14 chrX@170     | 5.23E-10 | 0.009873 |
| 8Mar2011- | 17253 | 805.47  | -13.7324 | 2 K.TPIFIPAP: chr5@186   | 3.70E-10 | 0.007748 |
| 8Mar2011- | 17254 | 634.84  | 6.410455 | 2 R.VDIGDILF Splice@chr  | 1.36E-12 | 0        |
| 8Mar2011- | 18250 | 996.87  | -23.3576 | 3 S.VPFSK+14 Splice@chr  | 2.76E-10 | 0.005853 |
| 8Mar2011- | 3307  | 494.6   | -1.40142 | 3 K.FPENRHI/ chr2@147    | 4.61E-10 | 0.009182 |
| 8Mar2011- | 15863 | 964.98  | -18.2348 | 2 _ .RFAEFAG chr2@151    | 2.37E-10 | 0.004771 |
| 8Mar2011- | 5155  | 434.24  | 13.9946  | 3 _ .RSNDQTI chr5@637    | 2.71E-10 | 0.00564  |
| 8Mar2011- | 16630 | 1173.12 | -8.41237 | 2 K.YLGAYLL/ Splice@chr  | 1.29E-11 | 4.03E-04 |
| 8Mar2011- | 16447 | 895.78  | -1.06827 | 3 _ .RELTEEDI Splice@chr | 1.38E-12 | 0        |
| 8Mar2011- | 5337  | 533.82  | 16.26677 | 2 K.TNIYTILTI chr5@132   | 1.32E-10 | 0.00282  |
| 8Mar2011- | 11418 | 838.94  | -22.1914 | 2 R.QFADLPS chr5@189     | 3.37E-10 | 0.007225 |

|           |       |         |          |                         |          |          |
|-----------|-------|---------|----------|-------------------------|----------|----------|
| 8Mar2011- | 14716 | 622.34  | 25.711   | 2 R.AK+14.01 chr2@4270  | 3.73E-10 | 0.005882 |
| 8Mar2011- | 5968  | 741.39  | -17.2291 | 2 K.QKSNWH chr5@1229    | 4.43E-11 | 4.56E-04 |
| 8Mar2011- | 367   | 422.27  | 2.173301 | 2 K.IGKGEVLI chrX@1204  | 1.11E-10 | 0.001828 |
| 8Mar2011- | 15683 | 1165.62 | 10.51339 | 2 Q.VCSKGRF Splice@chr  | 4.40E-10 | 0.007612 |
| 8Mar2011- | 5604  | 741.39  | -17.2291 | 2 K.QKSNWH chr5@1229    | 5.10E-11 | 6.78E-04 |
| 8Mar2011- | 11909 | 671.37  | -24.0361 | 2 T.FNIVHTQ Splice@chr  | 5.12E-10 | 0.008908 |
| 8Mar2011- | 13059 | 556.86  | -10.3839 | 2 R.QNKIVLI Splice@chr  | 5.36E-10 | 0.009475 |
| 8Mar2011- | 1464  | 873.51  | -11.1925 | 1 R.QLGFPIAI chr3@2252  | 4.06E-10 | 0.006652 |
| 8Mar2011- | 20659 | 685.71  | -7.22287 | 3 K.LFVCVLG chr2@7808   | 4.69E-10 | 0.008279 |
| 8Mar2011- | 18102 | 895.78  | -1.06827 | 3 _RELTEEDI Splice@chr  | 9.43E-12 | 1.24E-04 |
| 8Mar2011- | 16932 | 913.5   | 5.790241 | 2 F.TEMPLGC chrX@9861   | 1.57E-11 | 3.55E-04 |
| 8Mar2011- | 17090 | 732.07  | 19.51873 | 3 R.ATDDWII Splice@chr  | 3.11E-10 | 0.004951 |
| 8Mar2011- | 10016 | 616.33  | -16.7632 | 2 K.LSKSVIFQ chr3@2798  | 5.44E-10 | 0.009657 |
| 8Mar2011- | 2227  | 446.77  | 19.99118 | 2 R.PVFSITTK chrX@1588  | 2.30E-10 | 0.003714 |
| 8Mar2011- | 9726  | 1137.65 | -15.1425 | 1 Q.FLVISFA\ chrX@1232  | 2.69E-10 | 0.004287 |
| 8Mar2011- | 17838 | 665.37  | -26.6417 | 2 Q.INNK+14 Splice@chr  | 2.64E-10 | 0.004287 |
| 8Mar2011- | 1504  | 801.46  | -26.9469 | 1 K.WAGVVL chr4@3669    | 7.32E-11 | 0.001551 |
| 8Mar2011- | 1501  | 585.8   | -7.30589 | 2 K.QDPISAT Splice@chr  | 2.98E-10 | 0.004762 |
| 8Mar2011- | 16788 | 1167.56 | -16.7225 | 2 L.K+14.016 Splice@chr | 8.14E-12 | 1.24E-04 |
| 8Mar2011- | 2909  | 1198.15 | 6.147088 | 2 _KIIEFYSKI chr5@1786  | 1.59E-11 | 3.55E-04 |
| 8Mar2011- | 18422 | 895.78  | -1.06827 | 3 _RELTEEDI Splice@chr  | 9.65E-13 | 0        |
| 8Mar2011- | 10931 | 1075.06 | -6.79295 | 2 R.TCSK+14. chr2@1253  | 4.85E-10 | 0.008651 |
| 8Mar2011- | 2755  | 915.48  | 12.14748 | 1 K.FHEIGGQ chrX@4727   | 1.30E-10 | 0.002029 |
| 8Mar2011- | 11620 | 648.67  | -5.75042 | 3 R.CVGLMD chr4@1320    | 1.68E-10 | 0.002317 |
| 8Mar2011- | 19901 | 909.82  | -3.91826 | 3 Y.FRLQGSIL chrX@9509  | 1.78E-10 | 0.002625 |
| 8Mar2011- | 19258 | 634.84  | 6.410455 | 2 R.VDIGDILF Splice@chr | 9.28E-13 | 0        |
| 8Mar2011- | 11876 | 609.32  | -4.6154  | 2 K.LSAENSEI chr2@1063  | 4.12E-10 | 0.006652 |
| 8Mar2011- | 17786 | 665.37  | -26.6417 | 2 Q.INNK+14 Splice@chr  | 3.50E-10 | 0.005408 |
| 8Mar2011- | 10595 | 663.85  | -5.06443 | 2 N.KMIFSMI chr4@8622   | 3.49E-10 | 0.005408 |
| 8Mar2011- | 10984 | 1075.06 | -6.79295 | 2 R.TCSK+14. chr2@1253  | 2.55E-10 | 0.004208 |
| 8Mar2011- | 5914  | 741.39  | -17.2291 | 2 K.QKSNWH chr5@1229    | 3.25E-11 | 4.56E-04 |
| 8Mar2011- | 19197 | 1120.59 | 13.8817  | 2 R.EWRPRPI chr4@1432   | 2.62E-10 | 0.004287 |
| 8Mar2011- | 18465 | 895.79  | 10.03186 | 3 _RELTEEDI Splice@chr  | 3.80E-13 | 0        |
| 8Mar2011- | 19978 | 678.86  | -16.6575 | 2 K.QRSRPVI chr5@8132   | 2.71E-10 | 0.004287 |
| 8Mar2011- | 20966 | 860.69  | 14.08015 | 4 R.FQSAAG Splice@chr   | 2.01E-13 | 0        |
| 8Mar2011- | 21644 | 783.75  | 7.307848 | 3 K.INWAVTI chr4@2890   | 2.06E-16 | 0        |
| 8Mar2011- | 21643 | 1175.13 | 14.90082 | 2 K.INWAVTI chr4@2890   | 2.81E-23 | 0        |
| 8Mar2011- | 16306 | 722.45  | -4.95112 | 2 R.RK+14.01 Splice@chr | 2.37E-10 | 0.003807 |
| 8Mar2011- | 6248  | 748.4   | -14.2094 | 2 K.QKSNWH chr5@1229    | 1.40E-11 | 3.55E-04 |
| 8Mar2011- | 3509  | 414.74  | -1.18019 | 2 R.FAAAHLA chrX@1289   | 5.20E-10 | 0.00919  |
| 8Mar2011- | 15245 | 1004.97 | -14.712  | 2 K.KVELALW Splice@chr  | 1.63E-21 | 0        |
| 8Mar2011- | 7417  | 895.51  | -6.04083 | 2 _SGISIEVN Splice@chr  | 3.05E-10 | 0.004762 |
| 8Mar2011- | 11966 | 671.37  | -24.0361 | 2 T.FNIVHTQ Splice@chr  | 5.21E-10 | 0.00919  |
| 8Mar2011- | 11963 | 661.68  | -10.9364 | 3 K.SMEHDQ chr3@8445    | 2.01E-10 | 0.002921 |
| 8Mar2011- | 17036 | 732.07  | 19.51873 | 3 R.ATDDWII Splice@chr  | 2.84E-10 | 0.004473 |
| 8Mar2011- | 19306 | 634.84  | 6.410455 | 2 R.VDIGDILF Splice@chr | 1.32E-13 | 0        |
| 8Mar2011- | 19299 | 1133.62 | -22.6149 | 2 V.IIK+14.01 chr1@6230 | 4.99E-10 | 0.008822 |

|           |       |         |          |                          |          |          |
|-----------|-------|---------|----------|--------------------------|----------|----------|
| 8Mar2011- | 15363 | 983.97  | 4.629411 | 2 R.SFSTIPDS chr2@1305   | 4.98E-20 | 0        |
| 8Mar2011- | 12985 | 1075.06 | -6.79295 | 2 R.TCSK+14. chr2@1255   | 2.67E-10 | 0.004287 |
| 8Mar2011- | 2707  | 616.85  | 16.05582 | 2 _..SSRHLPSt Splice@chr | 1.41E-10 | 0.002128 |
| 8Mar2011- | 22542 | 550.63  | 9.075933 | 3 R.CFELFLK+ chrX@2485   | 4.90E-11 | 5.69E-04 |
| 8Mar2011- | 14750 | 1153.23 | -17.5731 | 3 F.EGIRTGG' Splice@chr  | 1.62E-15 | 0        |
| 8Mar2011- | 20999 | 688.75  | 8.895763 | 5 R.FQSAAG Splice@chr    | 1.17E-10 | 0.001828 |
| 8Mar2011- | 18169 | 1003.19 | 17.13413 | 3 R.CWNRRA Splice@chr    | 8.24E-12 | 1.24E-04 |
| 8Mar2011- | 7559  | 534.32  | 13.11853 | 2 K.TNIYTILTI chr5@1325  | 2.84E-10 | 0.004473 |
| 8Mar2011- | 11852 | 671.37  | -24.0361 | 2 T.FNIVHTQ Splice@chr   | 2.66E-10 | 0.004287 |
| 8Mar2011- | 7600  | 870.51  | 4.219085 | 1 K.IQKMPPF chrX@1225    | 4.85E-10 | 0.008651 |
| 8Mar2011- | 20493 | 959.54  | 18.06294 | 2 Y.NNCKLNS chrX@1250    | 7.41E-11 | 0.001551 |
| 8Mar2011- | 15395 | 888.47  | 22.8338  | 2 K.DITLEVEA' Splice@chr | 6.78E-13 | 0        |
| 8Mar2011- | 17208 | 827.44  | 8.758367 | 2 ?..YKKNNSE Splice@chr  | 5.18E-10 | 0.00919  |
| 8Mar2011- | 18645 | 1013.54 | -22.3432 | 3 K.ACLNVTY chr4@4860    | 2.54E-10 | 0.004108 |
| 8Mar2011- | 11405 | 520.78  | 10.0988  | 2 _..KFEVNFE chrX@6145   | 4.21E-10 | 0.00704  |
| 8Mar2011- | 4285  | 439.91  | 17.33685 | 3 K.NSQKNPI chr2@3540    | 5.25E-10 | 0.00919  |
| 8Mar2011- | 20996 | 860.69  | 14.08015 | 4 R.FQSAAG Splice@chr    | 8.60E-15 | 0        |
| 8Mar2011- | 14044 | 858.48  | 6.006088 | 3 _..LETGIKPt Splice@chr | 2.06E-12 | 0        |
| 8Mar2011- | 20132 | 1159.62 | 2.451592 | 2 I.K+14.016' chrX@7012  | 5.06E-10 | 0.008822 |
| 8Mar2011- | 12487 | 1156.9  | 16.3571  | 3 _..HTGPGVI Splice@chr  | 2.02E-16 | 0        |
| 8Mar2011- | 16202 | 722.45  | -4.95112 | 2 R.RK+14.01 Splice@chr  | 2.55E-10 | 0.004208 |
| 8Mar2011- | 13651 | 1005.17 | -11.4269 | 3 L.LTTCNRRI Splice@chr  | 2.86E-11 | 4.56E-04 |
| 8Mar2011- | 7362  | 895.51  | -6.04083 | 2 _..SGISIEVN Splice@chr | 2.66E-10 | 0.004287 |
| 8Mar2011- | 2954  | 562.31  | -13.4391 | 2 R.FYLLYLYK Splice@chr  | 9.75E-11 | 0.001828 |
| 8Mar2011- | 15188 | 1005.48 | -6.41263 | 2 K.KVELALW Splice@chr   | 8.46E-23 | 0        |
| 8Mar2011- | 13401 | 838.94  | -22.1914 | 2 R.QFADLPS chr5@1895    | 3.49E-10 | 0.005408 |
| 8Mar2011- | 6061  | 787.43  | -1.78505 | 1 K.SDAAPAK chrX@8015    | 4.82E-10 | 0.008651 |
| 8Mar2011- | 12028 | 671.37  | -24.0361 | 2 T.FNIVHTQ Splice@chr   | 3.27E-10 | 0.005041 |
| 8Mar2011- | 7505  | 534.32  | 13.11853 | 2 K.TNIYTILTI chr5@1325  | 3.07E-10 | 0.004762 |
| 8Mar2011- | 10837 | 1162.23 | 14.80982 | 3 _..HTGPGVI Splice@chr  | 4.39E-13 | 0        |
| 8Mar2011- | 5545  | 741.39  | -17.2291 | 2 K.QKSNWH chr5@1225     | 1.80E-11 | 3.55E-04 |
| 8Mar2011- | 5544  | 494.6   | -1.40142 | 3 K.FPENRHI, chr2@1475   | 2.16E-10 | 0.003323 |
| 8Mar2011- | 19314 | 805.47  | -13.7324 | 2 K.TPIFIPAP' chr5@1861  | 4.29E-10 | 0.00723  |
| 8Mar2011- | 15173 | 639.37  | -1.2901  | 2 N.FSYLVKI chr3@2491    | 3.55E-10 | 0.005408 |
| 8Mar2011- | 3039  | 616.81  | 20.31896 | 2 R.SGGGGG chr5@1954     | 5.60E-10 | 0.009926 |
| 8Mar2011- | 5864  | 741.39  | -17.2291 | 2 K.QKSNWH chr5@1225     | 2.23E-11 | 3.55E-04 |
| 8Mar2011- | 7188  | 434.24  | 13.9946  | 3 _..RSNDQTI chr5@6375   | 1.31E-10 | 0.002029 |
| 8Mar2011- | 15630 | 1165.62 | 10.51339 | 2 Q.VCSKGRE Splice@chr   | 8.48E-11 | 0.001758 |
| 8Mar2011- | 13090 | 1156.9  | 16.3571  | 3 _..HTGPGVI Splice@chr  | 7.76E-14 | 0        |
| 8Mar2011- | 7613  | 534.32  | 13.11853 | 2 K.TNIYTILTI chr5@1325  | 2.82E-10 | 0.004473 |
| 8Mar2011- | 18048 | 895.78  | -1.06827 | 3 _..RELTEEDI Splice@chr | 4.00E-12 | 0        |
| 8Mar2011- | 12540 | 867.93  | 19.80799 | 4 _..HTGPGVI Splice@chr  | 4.93E-11 | 5.69E-04 |
| 8Mar2011- | 12542 | 1156.9  | 16.3571  | 3 _..HTGPGVI Splice@chr  | 3.15E-15 | 0        |
| 8Mar2011- | 7883  | 717.89  | -17.2831 | 2 K.LRGWNK chr3@8881     | 2.68E-10 | 0.004287 |
| 8Mar2011- | 18511 | 895.79  | 10.03186 | 3 _..RELTEEDI Splice@chr | 6.39E-12 | 0        |
| 8Mar2011- | 5493  | 741.39  | -17.2291 | 2 K.QKSNWH chr5@1225     | 1.53E-11 | 3.55E-04 |
| 8Mar2011- | 13846 | 606.67  | -2.35139 | 3 I.NRFNISK chrX@1250    | 1.61E-10 | 0.002317 |

|           |       |         |          |                         |          |          |
|-----------|-------|---------|----------|-------------------------|----------|----------|
| 8Mar2011- | 7221  | 663.85  | -5.06443 | 2 N.KMIFSMI chr4@8625   | 1.99E-10 | 0.003463 |
| 8Mar2011- | 14847 | 1147.25 | 13.44098 | 3 R.FQSAAIG Splice@chr  | 4.72E-15 | 0        |
| 8Mar2011- | 3429  | 626.3   | -9.76097 | 2 R.LCESGAA Splice@chr  | 2.32E-16 | 0        |
| 8Mar2011- | 10654 | 1153.23 | -17.5731 | 3 F.EGIRTGG Splice@chr  | 4.93E-16 | 0        |
| 8Mar2011- | 3229  | 741.39  | -17.2291 | 2 K.QKSNWH chr5@1229    | 7.18E-11 | 0.001671 |
| 8Mar2011- | 3842  | 617.33  | 16.27136 | 1 R.NVGGGG Splice@chr   | 1.81E-10 | 0.003463 |
| 8Mar2011- | 10701 | 1153.23 | -17.5731 | 3 F.EGIRTGG Splice@chr  | 1.83E-14 | 0        |
| 8Mar2011- | 4556  | 533.82  | 16.26677 | 2 K.TNIYTILTI chr5@1329 | 4.54E-10 | 0.008103 |
| 8Mar2011- | 11154 | 888.47  | 22.8338  | 2 K.DITLEVEA Splice@chr | 7.83E-13 | 0        |
| 8Mar2011- | 2833  | 494.59  | -21.6808 | 3 K.FPENRHI chr2@1475   | 5.13E-10 | 0.009819 |
| 8Mar2011- | 10963 | 965.77  | 2.231213 | 4 R.FPHFRAS chr1@4385   | 2.80E-10 | 0.005839 |
| 8Mar2011- | 15241 | 920.5   | -7.30166 | 2 K.K+14.016 chr1@1372  | 2.14E-10 | 0.00391  |
| 8Mar2011- | 13919 | 634.84  | 6.410455 | 2 R.VDIGDILF Splice@chr | 4.99E-12 | 0        |
| 8Mar2011- | 12297 | 1187.58 | 10.28775 | 3 R.NGAPPSC Splice@chr  | 3.62E-10 | 0.006989 |
| 8Mar2011- | 2568  | 843.91  | 2.027504 | 2 R.ADALYNF Splice@chr  | 1.76E-18 | 0        |
| 8Mar2011- | 3539  | 748.39  | -27.6021 | 2 K.QKSNWH chr5@1229    | 2.39E-11 | 8.65E-04 |
| 8Mar2011- | 721   | 873.51  | -11.1925 | 1 R.QLGFPIAI chr3@2252  | 3.73E-10 | 0.007115 |
| 8Mar2011- | 2890  | 741.39  | -17.2291 | 2 K.QKSNWH chr5@1229    | 3.85E-11 | 8.65E-04 |
| 8Mar2011- | 8962  | 668.41  | 26.29011 | 1 R.GGGHIVK chr4@4025   | 1.63E-10 | 0.003463 |
| 8Mar2011- | 9504  | 838.94  | -22.1914 | 2 R.QFADLPS chr5@1898   | 4.18E-10 | 0.007377 |
| 8Mar2011- | 14531 | 777.08  | 13.6322  | 3 Q.EPVEDGI Splice@chr  | 4.39E-13 | 0        |
| 8Mar2011- | 11142 | 983.97  | 4.629411 | 2 R.SFSTIPDS chr2@1305  | 1.32E-17 | 0        |
| 8Mar2011- | 9860  | 607     | -9.70672 | 3 I.NRFNISK chrX@1250   | 1.08E-10 | 0.002603 |
| 8Mar2011- | 13702 | 1042.04 | -10.9972 | 2 R.NFQENGI chr1@1316   | 2.83E-10 | 0.005839 |
| 8Mar2011- | 5594  | 435.25  | -4.00582 | 2 K.KISAHGTI chr4@1727  | 4.09E-10 | 0.007377 |
| 8Mar2011- | 12987 | 665.37  | -26.6417 | 2 Q.INNK+14 Splice@chr  | 4.96E-10 | 0.009686 |
| 8Mar2011- | 7464  | 1162.23 | 14.80982 | 3 _HTGPGVI Splice@chr   | 1.18E-15 | 0        |
| 8Mar2011- | 14841 | 860.69  | 14.08015 | 4 R.FQSAAIG Splice@chr  | 1.41E-10 | 0.003463 |
| 8Mar2011- | 2834  | 741.39  | -17.2291 | 2 K.QKSNWH chr5@1229    | 4.66E-11 | 0.00103  |
| 8Mar2011- | 13468 | 1007.86 | 15.19559 | 3 R.CWNRRA Splice@chr   | 4.31E-12 | 0        |
| 8Mar2011- | 14254 | 1060.54 | -6.74128 | 3 K.SGTIFDNI Splice@chr | 1.08E-12 | 0        |
| 8Mar2011- | 13892 | 805.47  | -13.7324 | 2 K.TPIFIPAP chr5@1861  | 2.22E-11 | 8.65E-04 |
| 8Mar2011- | 9302  | 1156.89 | 7.624255 | 3 _HTGPGVI Splice@chr   | 6.88E-13 | 0        |
| 8Mar2011- | 7911  | 657.04  | -26.9179 | 3 R.GNVRK+1 chrX@7490   | 4.66E-11 | 0.00103  |
| 8Mar2011- | 3588  | 748.39  | -27.6021 | 2 K.QKSNWH chr5@1229    | 2.39E-11 | 8.65E-04 |
| 8Mar2011- | 8363  | 671.37  | -24.0361 | 2 T.FNIVHTQ Splice@chr  | 2.41E-10 | 0.004511 |
| 8Mar2011- | 15177 | 1175.12 | 6.371728 | 2 K.INWAVTI chr4@2890   | 2.12E-13 | 0        |
| 8Mar2011- | 15170 | 783.75  | 7.307848 | 3 K.INWAVTI chr4@2890   | 6.42E-13 | 0        |
| 8Mar2011- | 12384 | 855.46  | -13.7147 | 3 _RVKYQKI Splice@chr   | 2.88E-10 | 0.005839 |
| 8Mar2011- | 8756  | 694.54  | 11.7794  | 5 _HTGPGVI Splice@chr   | 1.87E-10 | 0.003463 |
| 8Mar2011- | 11205 | 888.47  | 22.8338  | 2 K.DITLEVEA Splice@chr | 8.90E-12 | 1.83E-04 |
| 8Mar2011- | 3178  | 741.39  | -17.2291 | 2 K.QKSNWH chr5@1229    | 3.68E-11 | 8.65E-04 |
| 8Mar2011- | 13205 | 895.78  | -1.06827 | 3 _RELTEEDI Splice@chr  | 1.09E-11 | 1.83E-04 |
| 8Mar2011- | 4940  | 717.89  | -17.2831 | 2 K.LRGWNK chr3@8881    | 3.08E-10 | 0.006267 |
| 8Mar2011- | 4805  | 460.27  | 26.14609 | 2 K.YPGIGGI Splice@chr  | 4.78E-11 | 0.001185 |
| 8Mar2011- | 13445 | 895.78  | -1.06827 | 3 _RELTEEDI Splice@chr  | 3.60E-10 | 0.006989 |
| 8Mar2011- | 2786  | 741.39  | -17.2291 | 2 K.QKSNWH chr5@1229    | 4.00E-11 | 8.65E-04 |

|           |       |         |          |                         |          |          |
|-----------|-------|---------|----------|-------------------------|----------|----------|
| 8Mar2011- | 3129  | 741.39  | -17.2291 | 2 K.QKSNWH chr5@1229    | 3.71E-11 | 8.65E-04 |
| 8Mar2011- | 14861 | 1147.25 | 13.44098 | 3 R.FQSAAIG Splice@chr  | 7.14E-16 | 0        |
| 8Mar2011- | 9570  | 1005.16 | -21.3951 | 3 L.LTTCNRRI Splice@chr | 1.92E-10 | 0.003463 |
| 8Mar2011- | 12171 | 677.61  | 5.437891 | 4 K.ESIVSVLT chrX@9696  | 1.34E-10 | 0.003378 |
| 8Mar2011- | 13851 | 965.03  | -17.4108 | 2 F.FLRQIRQI chr4@3226  | 1.13E-10 | 0.002603 |
| 8Mar2011- | 4672  | 534.32  | 13.11853 | 2 K.TNIYTILTI chr5@1329 | 1.31E-10 | 0.003378 |
| 8Mar2011- | 13166 | 895.78  | -1.06827 | 3 _RELTEEDI Splice@chr  | 1.45E-11 | 1.83E-04 |
| 8Mar2011- | 14502 | 777.08  | 13.6322  | 3 Q.EPVEDGI Splice@chr  | 6.95E-12 | 0        |
| 8Mar2011- | 11953 | 848.98  | 12.59627 | 2 R.LLELAPTC chr2@6685  | 1.65E-15 | 0        |
| 8Mar2011- | 5915  | 695.42  | -0.61526 | 1 R.GAGIHIK. chrX@7403  | 4.79E-10 | 0.008381 |
| 8Mar2011- | 14281 | 1060.54 | -6.74128 | 3 K.SGTIFDNI Splice@chr | 4.44E-12 | 0        |
| 8Mar2011- | 16267 | 777.08  | 13.6322  | 3 Q.EPVEDGI Splice@chr  | 1.28E-13 | 0        |
| 8Mar2011- | 14709 | 895.78  | -1.06827 | 3 _RELTEEDI Splice@chr  | 3.01E-10 | 0.008061 |
| 8Mar2011- | 6207  | 534.32  | 13.11853 | 2 K.TNIYTILTI chr5@1329 | 1.69E-10 | 0.004866 |
| 8Mar2011- | 2437  | 1198.15 | 6.147088 | 2 _KIIIFYSKI chr5@1786  | 3.43E-11 | 0.001469 |
| 8Mar2011- | 1507  | 535.31  | 16.29583 | 2 K.ENKVKHC chrX@9507   | 3.54E-10 | 0.009229 |
| 8Mar2011- | 14960 | 895.78  | -1.06827 | 3 _RELTEEDI Splice@chr  | 9.28E-13 | 0        |
| 8Mar2011- | 4818  | 741.39  | -17.2291 | 2 K.QKSNWH chr5@1229    | 3.05E-11 | 0.001154 |
| 8Mar2011- | 10980 | 838.94  | -22.1914 | 2 R.QFADLPS chr5@1898   | 2.22E-10 | 0.006922 |
| 8Mar2011- | 1054  | 873.51  | -11.1925 | 1 R.QLGFPIAI chr3@2252  | 3.38E-10 | 0.008153 |
| 8Mar2011- | 10535 | 870.48  | 7.030425 | 1 K.ATTQRHF chr2@6973   | 2.42E-10 | 0.007169 |
| 8Mar2011- | 14669 | 895.78  | -1.06827 | 3 _RELTEEDI Splice@chr  | 1.26E-11 | 3.38E-04 |
| 8Mar2011- | 4870  | 741.39  | -17.2291 | 2 K.QKSNWH chr5@1229    | 1.81E-11 | 3.38E-04 |
| 8Mar2011- | 2127  | 915.47  | 1.201399 | 1 K.FHEIGGQ chrX@4727   | 3.24E-11 | 0.00131  |
| 8Mar2011- | 16243 | 777.08  | 13.6322  | 3 Q.EPVEDGI Splice@chr  | 5.94E-12 | 1.78E-04 |
| 8Mar2011- | 11508 | 1030.52 | 12.84278 | 2 L.SPIPEVPC Splice@chr | 2.97E-19 | 0        |
| 8Mar2011- | 2636  | 533.26  | 4.128259 | 2 G.FGGGGIS chr2@5083   | 2.39E-10 | 0.007169 |
| 8Mar2011- | 15050 | 1013.54 | -22.3432 | 3 K.ACLNVTY chr4@4860   | 9.98E-11 | 0.003047 |
| 8Mar2011- | 5179  | 748.39  | -27.6021 | 2 K.QKSNWH chr5@1229    | 1.42E-11 | 3.38E-04 |
| 8Mar2011- | 4765  | 741.39  | -17.2291 | 2 K.QKSNWH chr5@1229    | 1.31E-11 | 3.38E-04 |
| 8Mar2011- | 7115  | 435.25  | -4.00582 | 2 K.KISAHGTI chr4@1727  | 1.32E-10 | 0.003733 |
| 8Mar2011- | 4561  | 741.39  | -17.2291 | 2 K.QKSNWH chr5@1229    | 1.86E-11 | 3.38E-04 |
| 8Mar2011- | 10833 | 1156.89 | 7.624255 | 3 _HTGPGVI Splice@chr   | 9.30E-13 | 0        |
| 8Mar2011- | 9901  | 671.37  | -24.0361 | 2 T.FNIVHTQ Splice@chr  | 3.59E-10 | 0.009229 |
| 8Mar2011- | 2253  | 490.29  | 7.297594 | 2 K.MNIYVLV chrX@1595   | 7.98E-11 | 0.002765 |
| 8Mar2011- | 4229  | 438.26  | 15.00593 | 2 R.DPKPPPP chr1@1285   | 1.59E-10 | 0.004439 |
| 8Mar2011- | 1029  | 801.46  | -26.9469 | 1 K.WAGVVL chr4@3669    | 3.68E-10 | 0.009619 |
| 8Mar2011- | 4502  | 741.39  | -17.2291 | 2 K.QKSNWH chr5@1229    | 4.60E-11 | 0.001751 |
| 8Mar2011- | 15528 | 805.47  | -13.7324 | 2 K.TPIFIPAP' chr5@1861 | 4.86E-11 | 0.001751 |
| 8Mar2011- | 10320 | 1156.56 | 11.5499  | 3 _HTGPGVI Splice@chr   | 9.00E-13 | 0        |
| 8Mar2011- | 10263 | 881.93  | 8.56293  | 2 F.LQEQGTY Splice@chr  | 2.42E-11 | 8.30E-04 |
| 8Mar2011- | 15021 | 694.87  | 2.550973 | 2 K.YHNITLQ chrX@3836   | 1.91E-10 | 0.005545 |
| 8Mar2011- | 5678  | 553.33  | -3.70337 | 2 K.PQAKPNI chr5@9002   | 2.29E-11 | 8.30E-04 |
| 8Mar2011- | 4619  | 741.39  | -17.2291 | 2 K.QKSNWH chr5@1229    | 5.25E-11 | 0.002053 |
| 8Mar2011- | 11458 | 1030.52 | 12.84278 | 2 L.SPIPEVPC Splice@chr | 3.99E-14 | 0        |
| 8Mar2011- | 15989 | 772.74  | 10.26062 | 3 Q.DPVEDGI Splice@chr  | 3.05E-11 | 0.001154 |
| 8Mar2011- | 5129  | 748.4   | -14.2094 | 2 K.QKSNWH chr5@1229    | 4.20E-11 | 0.001751 |

|           |       |         |          |                         |          |          |
|-----------|-------|---------|----------|-------------------------|----------|----------|
| 8Mar2011- | 9819  | 661.34  | -19.3485 | 3 K.SMEHDQ chr3@8445    | 3.75E-10 | 0.009619 |
| 8Mar2011- | 8731  | 886     | 3.172487 | 2 F.ENVEVII Splice@chr  | 1.64E-12 | 0        |
| 8Mar2011- | 2273  | 458.24  | 3.604198 | 2 K.FHEIGGQ chrX@4727   | 3.20E-11 | 0.00131  |
| 8Mar2011- | 12397 | 888.47  | 22.8338  | 2 K.DITLEVEA Splice@chr | 1.12E-14 | 0        |
| 8Mar2011- | 4452  | 741.39  | -17.2291 | 2 K.QKSNWH chr5@1229    | 4.26E-11 | 0.001751 |
| 8Mar2011- | 12593 | 983.97  | 4.629411 | 2 R.SFSTIPDS chr2@1305  | 5.86E-17 | 0        |
| 8Mar2011- | 12646 | 888.47  | 22.8338  | 2 K.DITLEVEA Splice@chr | 1.07E-12 | 0        |
| 8Mar2011- | 15552 | 634.84  | 6.410455 | 2 R.VDIGDILF Splice@chr | 4.66E-12 | 1.78E-04 |
| 8Mar2011- | 9126  | 1075.06 | -6.79295 | 2 R.TCSK+14. chr2@1255  | 2.92E-10 | 0.007034 |
| 8Mar2011- | 3845  | 494.6   | -1.40142 | 3 K.FPENRHI chr2@1477   | 3.57E-10 | 0.008416 |
| 8Mar2011- | 3846  | 741.39  | -17.2291 | 2 K.QKSNWH chr5@1229    | 1.27E-11 | 1.37E-04 |
| 8Mar2011- | 3799  | 741.39  | -17.2291 | 2 K.QKSNWH chr5@1229    | 8.18E-11 | 0.002081 |
| 8Mar2011- | 10544 | 1156.56 | 11.5499  | 3 _HTGPGVI Splice@chr   | 5.75E-15 | 0        |
| 8Mar2011- | 934   | 915.48  | 12.14748 | 1 K.FHEIGGQ chrX@4727   | 1.34E-10 | 0.003332 |
| 8Mar2011- | 4197  | 741.39  | -17.2291 | 2 K.QKSNWH chr5@1229    | 2.82E-11 | 3.86E-04 |
| 8Mar2011- | 16040 | 895.78  | -1.06827 | 3 _RELTEEDI Splice@chr  | 9.30E-12 | 1.37E-04 |
| 8Mar2011- | 10155 | 671.37  | -24.0361 | 2 T.FNIVHTQ Splice@chr  | 2.59E-10 | 0.006626 |
| 8Mar2011- | 13348 | 1005.47 | -16.3827 | 2 K.KVELALM Splice@chr  | 1.22E-22 | 0        |
| 8Mar2011- | 15557 | 746.91  | 13.99266 | 2 V.EK+14.01 Splice@chr | 5.46E-12 | 0        |
| 8Mar2011- | 4514  | 748.4   | -14.2094 | 2 K.QKSNWH chr5@1229    | 5.55E-11 | 0.001374 |
| 8Mar2011- | 17701 | 927.16  | -21.8641 | 3 K.MQNLDL Splice@chr   | 1.17E-10 | 0.002754 |
| 8Mar2011- | 12025 | 1030.52 | 12.84278 | 2 L.SPIEVPC Splice@chr  | 4.24E-17 | 0        |
| 8Mar2011- | 11071 | 1156.89 | 7.624255 | 3 _HTGPGVI Splice@chr   | 3.68E-15 | 0        |
| 8Mar2011- | 10587 | 867.92  | 8.25809  | 4 _HTGPGVI Splice@chr   | 3.01E-10 | 0.00725  |
| 8Mar2011- | 10659 | 1156.56 | 11.5499  | 3 _HTGPGVI Splice@chr   | 2.74E-13 | 0        |
| 8Mar2011- | 15993 | 895.78  | -1.06827 | 3 _RELTEEDI Splice@chr  | 1.98E-13 | 0        |
| 8Mar2011- | 8722  | 886     | 3.172487 | 2 F.ENVEVII Splice@chr  | 1.61E-12 | 0        |
| 8Mar2011- | 2876  | 439.91  | -18.8195 | 3 R.NSYNGLF chr4@9687   | 1.44E-10 | 0.003552 |
| 8Mar2011- | 16425 | 895.78  | -1.06827 | 3 _RELTEEDI Splice@chr  | 3.62E-12 | 0        |
| 8Mar2011- | 4252  | 741.39  | -17.2291 | 2 K.QKSNWH chr5@1229    | 5.43E-11 | 0.001374 |
| 8Mar2011- | 17131 | 634.84  | 6.410455 | 2 R.VDIGDILF Splice@chr | 2.61E-12 | 0        |
| 8Mar2011- | 10417 | 1060.53 | -5.24509 | 1 _LVQDEN\ Splice@chr   | 2.63E-10 | 0.006735 |
| 8Mar2011- | 16383 | 895.78  | -1.06827 | 3 _RELTEEDI Splice@chr  | 6.77E-12 | 0        |
| 8Mar2011- | 11149 | 870.48  | 7.030425 | 1 K.ATTQRHF chr2@6975   | 3.32E-10 | 0.007886 |
| 8Mar2011- | 14360 | 848.98  | 12.59627 | 2 R.LLELAPT chr2@6685   | 4.63E-18 | 0        |
| 8Mar2011- | 10147 | 682.33  | -11.6457 | 2 P.LSSWNVI Splice@chr  | 3.78E-10 | 0.009176 |
| 8Mar2011- | 18659 | 688.75  | 8.895763 | 5 R.FQSAAIG Splice@chr  | 1.27E-11 | 1.37E-04 |
| 8Mar2011- | 11900 | 607     | -9.70672 | 3 I.NRFNISK chrX@1250   | 1.40E-10 | 0.003444 |
| 8Mar2011- | 13293 | 1005.48 | -6.41263 | 2 K.KVELALM Splice@chr  | 5.00E-20 | 0        |
| 8Mar2011- | 3906  | 741.39  | -17.2291 | 2 K.QKSNWH chr5@1229    | 2.48E-11 | 3.86E-04 |
| 8Mar2011- | 143   | 659.86  | 24.17926 | 2 K.RERM+15 chr4@1242   | 1.72E-11 | 3.86E-04 |
| 8Mar2011- | 2556  | 440.24  | 7.186688 | 3 K.NSQKNPI chr2@3540   | 1.21E-10 | 0.002754 |
| 8Mar2011- | 5622  | 533.82  | 16.26677 | 2 K.TNIYTILTI chr5@1329 | 2.52E-10 | 0.006626 |
| 8Mar2011- | 5801  | 534.32  | 13.11853 | 2 K.TNIYTILTI chr5@1329 | 2.41E-10 | 0.006307 |
| 8Mar2011- | 19261 | 783.75  | 7.307848 | 3 K.INWAVTI chr4@2890   | 1.67E-15 | 0        |
| 8Mar2011- | 15723 | 665.37  | -26.6417 | 2 Q.INNK+14 Splice@chr  | 2.64E-10 | 0.006735 |
| 8Mar2011- | 1784  | 533.26  | 4.128259 | 2 G.FGGGGIS chr2@5085   | 3.43E-10 | 0.008309 |

|           |       |         |          |                          |          |          |
|-----------|-------|---------|----------|--------------------------|----------|----------|
| 8Mar2011- | 2613  | 439.91  | 17.33685 | 3 K.NSQKNPI chr2@3540    | 7.95E-11 | 0.002081 |
| 8Mar2011- | 10599 | 1156.57 | 20.14189 | 3 _..HTGPGVI Splice@chr  | 2.06E-11 | 3.86E-04 |
| 8Mar2011- | 13701 | 1165.61 | 1.914663 | 2 Q.VCSKGRE Splice@chr   | 8.86E-11 | 0.002306 |
| 8Mar2011- | 17175 | 805.47  | -13.7324 | 2 K.TPIFIPAP chr5@1861   | 3.39E-13 | 0        |
| 8Mar2011- | 8778  | 886     | 3.172487 | 2 F.ENVVEVII Splice@chr  | 3.85E-11 | 7.60E-04 |
| 8Mar2011- | 11726 | 813.92  | -13.5592 | 2 _..QGKM+1 Splice@chr   | 1.91E-10 | 0.004997 |
| 8Mar2011- | 4150  | 741.39  | -17.2291 | 2 K.QKSNWH chr5@1229     | 3.77E-11 | 7.60E-04 |
| 8Mar2011- | 18677 | 860.69  | 14.08015 | 4 R.FQSAAG Splice@chr    | 2.17E-12 | 0        |
| 8Mar2011- | 11283 | 1156.9  | 16.3571  | 3 _..HTGPGVI Splice@chr  | 4.66E-13 | 0        |
| 8Mar2011- | 10098 | 671.37  | -24.0361 | 2 T.FNIVHTQ Splice@chr   | 3.03E-10 | 0.00725  |
| 8Mar2011- | 9020  | 1162.23 | 14.80982 | 3 _..HTGPGVI Splice@chr  | 3.21E-14 | 0        |
| 8Mar2011- | 17977 | 895.79  | 10.03186 | 3 _..RELTEEDI Splice@chr | 3.46E-12 | 0        |
| 8Mar2011- | 3110  | 459.74  | 26.97556 | 2 _..ERQNGGI chr1@1431   | 5.09E-11 | 9.70E-04 |
| 8Mar2011- | 17773 | 665.37  | -26.6417 | 2 Q.INNK+14 Splice@chr   | 4.17E-10 | 0.009142 |
| 8Mar2011- | 9904  | 1137.65 | -15.1425 | 1 Q.FLVISFA chrX@1232    | 3.15E-10 | 0.007277 |
| 8Mar2011- | 15052 | 1153.23 | -17.5731 | 3 F.EGIRTGG Splice@chr   | 4.29E-15 | 0        |
| 8Mar2011- | 18594 | 1173.13 | 0.131152 | 2 K.YLGAYLL Splice@chr   | 6.19E-11 | 0.001198 |
| 8Mar2011- | 18025 | 895.78  | -1.06827 | 3 _..RELTEEDI Splice@chr | 4.55E-12 | 0        |
| 8Mar2011- | 21166 | 783.75  | 7.307848 | 3 K.INWAVTI chr4@2890    | 3.25E-15 | 0        |
| 8Mar2011- | 12857 | 657.38  | -23.6186 | 2 K.LNVDWLI Splice@chr   | 4.26E-10 | 0.009343 |
| 8Mar2011- | 12507 | 1156.57 | 20.14189 | 3 _..HTGPGVI Splice@chr  | 1.27E-12 | 0        |
| 8Mar2011- | 16902 | 1187.58 | 10.28775 | 3 R.NGAPPSC Splice@chr   | 2.84E-10 | 0.006557 |
| 8Mar2011- | 18413 | 895.79  | 10.03186 | 3 _..RELTEEDI Splice@chr | 5.23E-13 | 0        |
| 8Mar2011- | 14478 | 938.46  | 22.50833 | 2 R.ECSQSDS chr2@8876    | 1.30E-10 | 0.003168 |
| 8Mar2011- | 12620 | 1156.57 | 20.14189 | 3 _..HTGPGVI Splice@chr  | 8.83E-13 | 0        |
| 8Mar2011- | 18377 | 895.45  | 3.912341 | 3 _..RELTEEDI Splice@chr | 2.79E-11 | 7.46E-04 |
| 8Mar2011- | 11978 | 671.37  | -24.0361 | 2 T.FNIVHTQ Splice@chr   | 3.92E-10 | 0.008642 |
| 8Mar2011- | 20614 | 860.69  | 14.08015 | 4 R.FQSAAG Splice@chr    | 1.95E-13 | 0        |
| 8Mar2011- | 11205 | 1075.06 | -6.79295 | 2 R.TCSK+14. chr2@1253   | 2.27E-10 | 0.005346 |
| 8Mar2011- | 5922  | 494.6   | -1.40142 | 3 K.FPENRHL chr2@1477    | 3.53E-10 | 0.007971 |
| 8Mar2011- | 4420  | 439.91  | 17.33685 | 3 K.NSQKNPI chr2@3540    | 3.90E-10 | 0.008642 |
| 8Mar2011- | 13628 | 838.94  | -22.1914 | 2 R.QFADLPS chr5@1898    | 3.98E-10 | 0.008642 |
| 8Mar2011- | 7821  | 534.32  | 13.11853 | 2 K.TNIYTILTI chr5@1329  | 3.59E-10 | 0.008384 |
| 8Mar2011- | 886   | 425.23  | 12.96682 | 2 K.HLNEHA chr5@5137     | 2.09E-10 | 0.005173 |
| 8Mar2011- | 17556 | 746.91  | 13.99266 | 2 V.EK+14.01 chrX@6709   | 7.76E-13 | 0        |
| 8Mar2011- | 11095 | 871.93  | 21.18917 | 4 _..HTGPGVI Splice@chr  | 1.88E-10 | 0.004434 |
| 8Mar2011- | 14208 | 1030.52 | 12.84278 | 2 L.SPIEVPC Splice@chr   | 2.18E-15 | 0        |
| 8Mar2011- | 7502  | 434.24  | 13.9946  | 3 _..RSNDQTI chr5@6378   | 2.36E-10 | 0.00545  |
| 8Mar2011- | 460   | 425.23  | 12.96682 | 2 K.HLNEHA chr5@5137     | 3.94E-10 | 0.008642 |
| 8Mar2011- | 21433 | 865.97  | 0.794696 | 4 R.NGRSFAF Splice@chr   | 1.31E-10 | 0.003168 |
| 8Mar2011- | 20639 | 1147.25 | 13.44098 | 3 R.FQSAAG Splice@chr    | 3.57E-16 | 0        |
| 8Mar2011- | 6342  | 741.39  | -17.2291 | 2 K.QKSNWH chr5@1229     | 4.57E-11 | 8.53E-04 |
| 8Mar2011- | 7926  | 534.32  | 13.11853 | 2 K.TNIYTILTI chr5@1329  | 4.40E-10 | 0.009737 |
| 8Mar2011- | 12141 | 671.37  | -24.0361 | 2 T.FNIVHTQ Splice@chr   | 2.14E-10 | 0.005346 |
| 8Mar2011- | 13523 | 1156.9  | 16.3571  | 3 _..HTGPGVI Splice@chr  | 3.39E-14 | 0        |
| 8Mar2011- | 7751  | 895.51  | -6.04083 | 2 _..SGISIEVN Splice@chr | 2.43E-10 | 0.005642 |
| 8Mar2011- | 6290  | 741.39  | -17.2291 | 2 K.QKSNWH chr5@1229     | 3.02E-11 | 7.46E-04 |

|           |       |         |          |                         |          |          |
|-----------|-------|---------|----------|-------------------------|----------|----------|
| 8Mar2011- | 13200 | 762.93  | 7.897192 | 2 K.CSKNSQII chr5@3746  | 3.22E-10 | 0.007456 |
| 8Mar2011- | 17859 | 987.5   | -5.85708 | 3 K.KYLFLDNI chr4@1288  | 2.74E-10 | 0.006161 |
| 8Mar2011- | 4548  | 447.74  | -24.0456 | 2 K.IIYDGSVK chrX@2516  | 1.37E-10 | 0.003168 |
| 8Mar2011- | 12642 | 881.92  | -2.80647 | 2 F.LQEQGTY Splice@chr  | 7.38E-12 | 0        |
| 8Mar2011- | 18066 | 1003.19 | 17.13413 | 3 R.CWNRRA Splice@chr   | 3.61E-12 | 0        |
| 8Mar2011- | 5878  | 741.39  | -17.2291 | 2 K.QKSNWH chr5@1229    | 5.62E-11 | 0.001082 |
| 8Mar2011- | 3278  | 562.31  | -13.4391 | 2 R.FYLLLYLK Splice@chr | 5.44E-11 | 0.001082 |
| 8Mar2011- | 1568  | 422.27  | 2.173301 | 2 K.IGKGEVLI chrX@1204  | 2.13E-10 | 0.005277 |
| 8Mar2011- | 1601  | 422.27  | 2.173301 | 2 K.IGKGEVLI chrX@1204  | 9.93E-11 | 0.002198 |
| 8Mar2011- | 13466 | 1156.9  | 16.3571  | 3 _HTGPGVI Splice@chr   | 1.24E-14 | 0        |
| 8Mar2011- | 20931 | 960.16  | -0.50908 | 3 N.GFEPRLA Splice@chr  | 2.43E-10 | 0.005642 |
| 8Mar2011- | 1994  | 801.46  | -26.9469 | 1 K.WAGVVL chr4@3669    | 1.01E-10 | 0.002198 |
| 8Mar2011- | 6666  | 748.4   | -14.2094 | 2 K.QKSNWH chr5@1229    | 1.21E-11 | 0        |
| 8Mar2011- | 12563 | 1156.57 | 20.14189 | 3 _HTGPGVI Splice@chr   | 2.24E-13 | 0        |
| 8Mar2011- | 8046  | 460.26  | 4.392893 | 2 K.YPGIGGI Splice@chr  | 4.22E-10 | 0.009142 |
| 8Mar2011- | 2697  | 446.77  | 19.99118 | 2 R.PVFSITTK chrX@1588  | 3.55E-10 | 0.008077 |
| 8Mar2011- | 17909 | 987.52  | 14.43646 | 3 K.KYLFLDNI chr4@1288  | 2.16E-10 | 0.005346 |
| 8Mar2011- | 15205 | 965.77  | 16.46969 | 4 R.K+14.016 chr5@2089  | 1.67E-10 | 0.003905 |
| 8Mar2011- | 5988  | 741.39  | -17.2291 | 2 K.QKSNWH chr5@1229    | 3.11E-11 | 7.46E-04 |
| 8Mar2011- | 5932  | 741.39  | -17.2291 | 2 K.QKSNWH chr5@1229    | 5.98E-11 | 0.001198 |
| 8Mar2011- | 12496 | 694.54  | 11.7794  | 5 _HTGPGVI Splice@chr   | 2.47E-10 | 0.005642 |
| 8Mar2011- | 21167 | 1175.13 | 14.90082 | 2 K.INWAVTI chr4@2890   | 1.50E-20 | 0        |
| 8Mar2011- | 16463 | 669.36  | -13.2955 | 2 K.LEFNISKI chr1@1931  | 1.47E-11 | 1.30E-04 |
| 8Mar2011- | 15497 | 983.97  | 4.629411 | 2 R.SFSTIPDS chr2@1309  | 2.06E-15 | 0        |
| 8Mar2011- | 19118 | 805.47  | -13.7324 | 2 K.TPIFIPAP chr5@1861  | 8.86E-11 | 0.001867 |
| 8Mar2011- | 8168  | 717.89  | -17.2831 | 2 K.LRGWNK chr3@8881    | 4.26E-10 | 0.009343 |
| 8Mar2011- | 17045 | 732.07  | 19.51873 | 3 R.ATDDWII Splice@chr  | 9.02E-11 | 0.001867 |
| 8Mar2011- | 2042  | 873.51  | -11.1925 | 1 R.QLGFPIAI chr3@2252  | 2.98E-10 | 0.006766 |
| 8Mar2011- | 19095 | 634.84  | 6.410455 | 2 R.VDIGDILF Splice@chr | 9.28E-13 | 0        |
| 8Mar2011- | 471   | 419.23  | -7.22396 | 2 R.RSPELVH chr5@4179   | 3.34E-10 | 0.007456 |
| 8Mar2011- | 3186  | 915.47  | 1.201399 | 1 K.FHEIGGQ chrX@4727   | 1.37E-10 | 0.003168 |
| 8Mar2011- | 14042 | 1120.59 | -14.8281 | 2 T.RFNNTI chr2@1312    | 9.26E-11 | 0.00198  |
| 8Mar2011- | 6236  | 741.39  | -17.2291 | 2 K.QKSNWH chr5@1229    | 2.08E-11 | 5.13E-04 |
| 8Mar2011- | 2025  | 585.8   | -7.30589 | 2 K.QDPISAT Splice@chr  | 2.33E-10 | 0.005346 |
| 8Mar2011- | 11530 | 888.47  | 22.8338  | 2 K.DITLEVEA Splice@chr | 2.06E-12 | 1.89E-04 |
| 8Mar2011- | 6258  | 509.3   | -20.473  | 2 R.SSVIMLIV chr2@5767  | 1.88E-11 | 5.42E-04 |
| 8Mar2011- | 10867 | 803.94  | 26.05354 | 2 H.ASSLMII Splice@chr  | 3.24E-10 | 0.008363 |
| 8Mar2011- | 15030 | 634.84  | 6.410455 | 2 R.VDIGDILF Splice@chr | 2.07E-12 | 1.89E-04 |
| 8Mar2011- | 3860  | 534.32  | 13.11853 | 2 K.TNIYTILTI chr5@1329 | 3.07E-10 | 0.007934 |
| 8Mar2011- | 2723  | 979.49  | 11.24178 | 1 _NLQNGN chr2@1080     | 2.00E-10 | 0.005746 |
| 8Mar2011- | 697   | 422.27  | 2.173301 | 2 K.IGKGEVLI chrX@1204  | 3.38E-10 | 0.008657 |
| 8Mar2011- | 16313 | 931.83  | -23.7659 | 3 K.MQNLDL Splice@chr   | 3.05E-10 | 0.007934 |
| 8Mar2011- | 11317 | 888.47  | 22.8338  | 2 K.DITLEVEA Splice@chr | 8.08E-15 | 0        |
| 8Mar2011- | 3578  | 533.82  | 16.26677 | 2 K.TNIYTILTI chr5@1329 | 1.75E-10 | 0.005152 |
| 8Mar2011- | 4228  | 529.6   | -12.9775 | 3 _AFHESKLI chrX@3409   | 7.55E-12 | 1.89E-04 |
| 8Mar2011- | 6321  | 1017.59 | -22.5744 | 1 R.SSVIMLIV chr2@5767  | 7.10E-11 | 0.00319  |
| 8Mar2011- | 15060 | 805.47  | -13.7324 | 2 K.TPIFIPAP chr5@1861  | 1.15E-11 | 1.89E-04 |

|           |       |         |          |                         |          |          |
|-----------|-------|---------|----------|-------------------------|----------|----------|
| 8Mar2011- | 14419 | 1013.54 | -22.3432 | 3 K.ACLNVTY chr4@4860   | 3.10E-10 | 0.008085 |
| 8Mar2011- | 10931 | 1153.23 | -17.5731 | 3 F.EGIRTTG Splice@chr  | 1.60E-13 | 0        |
| 8Mar2011- | 12483 | 849.48  | 10.61812 | 2 R.LLELAPT chr2@6685   | 2.49E-17 | 0        |
| 8Mar2011- | 3069  | 693.87  | -6.6949  | 2 V.ICVAVGD chr5@1065   | 1.50E-10 | 0.004706 |
| 8Mar2011- | 6428  | 509.3   | -20.473  | 2 R.SSVIMLIV chr2@5767  | 2.20E-10 | 0.006348 |
| 8Mar2011- | 12426 | 848.97  | 0.791766 | 2 R.LLELAPT chr2@6685   | 9.92E-18 | 0        |
| 8Mar2011- | 10288 | 858.48  | 6.006088 | 3 _LETGIIKPI Splice@chr | 2.01E-11 | 5.42E-04 |
| 8Mar2011- | 14501 | 1173.12 | -8.41237 | 2 K.YLGAYLL Splice@chr  | 9.44E-11 | 0.003665 |
| 8Mar2011- | 11482 | 647.34  | -21.2146 | 2 K.NNIK+14. chrX@7865  | 3.69E-10 | 0.008792 |
| 8Mar2011- | 6367  | 509.3   | -20.473  | 2 R.SSVIMLIV chr2@5767  | 3.28E-11 | 0.00106  |
| 8Mar2011- | 8163  | 671.37  | -24.0361 | 2 T.FNIVHTQ Splice@chr  | 2.70E-10 | 0.007215 |
| 8Mar2011- | 11118 | 1182.57 | -12.6646 | 1 R.RFAENQI chr5@1779   | 2.71E-10 | 0.007353 |
| 8Mar2011- | 16351 | 860.69  | 14.08015 | 4 R.FQSAAIG Splice@chr  | 1.05E-13 | 0        |
| 8Mar2011- | 4255  | 1025.62 | -1.90621 | 1 K.LGLGSGL chr5@4945   | 1.32E-11 | 3.75E-04 |
| 8Mar2011- | 16766 | 1175.12 | 6.371728 | 2 K.INWAVTI chr4@2890   | 6.36E-23 | 0        |
| 8Mar2011- | 16318 | 688.75  | 8.895763 | 5 R.FQSAAIG Splice@chr  | 3.93E-11 | 0.001569 |
| 8Mar2011- | 14076 | 1003.19 | 17.13413 | 3 R.CWNRRA Splice@chr   | 1.34E-12 | 0        |
| 8Mar2011- | 16330 | 860.69  | 14.08015 | 4 R.FQSAAIG Splice@chr  | 4.29E-15 | 0        |
| 8Mar2011- | 1721  | 407.74  | 5.852463 | 2 R.ASDIAPIK chrX@1799  | 2.29E-10 | 0.00679  |
| 8Mar2011- | 6312  | 509.3   | -20.473  | 2 R.SSVIMLIV chr2@5767  | 8.16E-11 | 0.00319  |
| 8Mar2011- | 16767 | 783.42  | 13.00166 | 3 K.INWAVTI chr4@2890   | 8.97E-14 | 0        |
| 8Mar2011- | 6378  | 1017.59 | -22.5744 | 1 R.SSVIMLIV chr2@5767  | 4.77E-11 | 0.00189  |
| 8Mar2011- | 13661 | 930.01  | 0.691376 | 2 _DTYYSNK chr2@6987    | 1.19E-10 | 0.003953 |
| 8Mar2011- | 12795 | 1167.56 | -16.7225 | 2 L.K+14.016 Splice@chr | 5.27E-13 | 0        |
| 8Mar2011- | 4244  | 510.78  | 4.430039 | 2 L.TYATQLP chr1@1227   | 2.76E-10 | 0.007577 |
| 8Mar2011- | 7892  | 1025.62 | -1.90621 | 1 K.LGLGSGL chr5@4945   | 1.68E-11 | 7.99E-04 |
| 8Mar2011- | 17740 | 1013.54 | -22.3432 | 3 K.ACLNVTY chr4@4860   | 2.11E-11 | 7.99E-04 |
| 8Mar2011- | 13504 | 855.41  | -22.1447 | 2 _HVQEVAI Splice@chr   | 1.18E-11 | 4.17E-04 |
| 8Mar2011- | 5530  | 741.39  | -17.2291 | 2 K.QKSNWH chr5@1229    | 2.74E-11 | 0.001303 |
| 8Mar2011- | 10379 | 886     | 3.172487 | 2 F.ENVVEVII Splice@chr | 1.20E-12 | 0        |
| 8Mar2011- | 16982 | 665.37  | -26.6417 | 2 Q.INNK+14 Splice@chr  | 3.67E-10 | 0.009332 |
| 8Mar2011- | 10322 | 886     | 3.172487 | 2 F.ENVVEVII Splice@chr | 1.47E-12 | 0        |
| 8Mar2011- | 5806  | 741.39  | -17.2291 | 2 K.QKSNWH chr5@1229    | 2.29E-11 | 7.99E-04 |
| 8Mar2011- | 10299 | 897.42  | -27.6753 | 3 _QVREMH Splice@chr    | 3.23E-10 | 0.008287 |
| 8Mar2011- | 18931 | 772.75  | 23.2369  | 3 Q.DPVEDG Splice@chr   | 7.80E-16 | 0        |
| 8Mar2011- | 15988 | 1167.56 | -16.7225 | 2 L.K+14.016 Splice@chr | 4.17E-14 | 0        |
| 8Mar2011- | 3408  | 409.22  | -18.6349 | 2 R.AGGGTAI chr2@7665   | 1.35E-10 | 0.004265 |
| 8Mar2011- | 19061 | 909.22  | -1.99927 | 4 R.RTSDSMI chr4@6771   | 8.97E-11 | 0.003037 |
| 8Mar2011- | 20075 | 1175.12 | 6.371728 | 2 K.INWAVTI chr4@2890   | 1.23E-22 | 0        |
| 8Mar2011- | 12109 | 881.92  | -2.80647 | 2 F.LQEQGTY Splice@chr  | 6.39E-12 | 4.17E-04 |
| 8Mar2011- | 5475  | 741.39  | -17.2291 | 2 K.QKSNWH chr5@1229    | 2.26E-11 | 7.99E-04 |
| 8Mar2011- | 16776 | 746.91  | 13.99266 | 2 V.EK+14.01 Splice@chr | 3.92E-12 | 1.51E-04 |
| 8Mar2011- | 19595 | 1147.25 | 13.44098 | 3 R.FQSAAIG Splice@chr  | 8.82E-15 | 0        |
| 8Mar2011- | 10268 | 663.85  | -5.06443 | 2 N.KMIFSMI chr4@8622   | 3.93E-10 | 0.009616 |
| 8Mar2011- | 17649 | 1013.54 | -22.3432 | 3 K.ACLNVTY chr4@4860   | 1.27E-10 | 0.004044 |
| 8Mar2011- | 14815 | 647.34  | -21.2146 | 2 K.NNIK+14. chrX@7865  | 2.79E-10 | 0.007671 |
| 8Mar2011- | 6938  | 693.87  | -6.6949  | 2 V.ICVAVGD chr5@1065   | 6.32E-11 | 0.002345 |

|           |       |         |          |                         |          |          |
|-----------|-------|---------|----------|-------------------------|----------|----------|
| 8Mar2011- | 19638 | 1147.25 | 13.44098 | 3 R.FQSAAIG Splice@chr  | 6.92E-17 | 0        |
| 8Mar2011- | 19858 | 770.77  | -11.1838 | 3 K.YLDAKCK chr4@3751   | 2.73E-10 | 0.007482 |
| 8Mar2011- | 19618 | 1147.25 | 13.44098 | 3 R.FQSAAIG Splice@chr  | 4.19E-16 | 0        |
| 8Mar2011- | 12585 | 556.86  | -10.3839 | 2 R.QNKIVLIV Splice@chr | 2.34E-10 | 0.005937 |
| 8Mar2011- | 9430  | 1137.65 | -15.1425 | 1 Q.FLVISFAV chrX@1232  | 3.44E-10 | 0.008813 |
| 8Mar2011- | 1928  | 420.2   | 7.498551 | 2 R.SSSSAAS Splice@chr  | 1.18E-10 | 0.003942 |
| 8Mar2011- | 1543  | 585.8   | -7.30589 | 2 K.QDPISATV Splice@chr | 2.53E-10 | 0.006594 |
| 8Mar2011- | 20072 | 783.75  | 7.307848 | 3 K.INWAVTI chr4@2890   | 6.07E-14 | 0        |
| 8Mar2011- | 17798 | 1173.13 | 0.131152 | 2 K.YLGAYLLV Splice@chr | 1.42E-10 | 0.004338 |
| 8Mar2011- | 17770 | 581.57  | 18.95936 | 4 K.YLGAYLLV Splice@chr | 2.57E-10 | 0.006816 |
| 8Mar2011- | 15690 | 848.98  | 12.59627 | 2 R.LLELAPTC chr2@6685  | 1.76E-17 | 0        |
| 8Mar2011- | 19622 | 860.69  | 14.08015 | 4 R.FQSAAIG Splice@chr  | 1.20E-14 | 0        |
| 8Mar2011- | 18254 | 634.84  | 6.410455 | 2 R.VDIGDILF Splice@chr | 8.60E-13 | 0        |
| 8Mar2011- | 8586  | 724.35  | 19.12636 | 3 V.CLTEEGK Splice@chr  | 1.72E-10 | 0.004547 |
| 8Mar2011- | 11534 | 671.37  | -24.0361 | 2 T.FNIVHTQ Splice@chr  | 2.24E-10 | 0.005608 |
| 8Mar2011- | 18372 | 737.88  | -5.09604 | 2 K.KPMEILYI chr1@8387  | 8.73E-11 | 0.002683 |
| 8Mar2011- | 12443 | 870.48  | 7.030425 | 1 K.ATTQRHF chr2@6975   | 3.37E-10 | 0.008494 |
| 8Mar2011- | 1257  | 422.27  | 2.173301 | 2 K.IGKGEVLI chrX@1204  | 3.08E-10 | 0.008203 |
| 8Mar2011- | 11419 | 661.4   | -2.4954  | 2 K.LVLIAVN1 chr1@6528  | 3.41E-10 | 0.008813 |
| 8Mar2011- | 19606 | 688.75  | 8.895763 | 5 R.FQSAAIG Splice@chr  | 1.09E-11 | 4.17E-04 |
| 8Mar2011- | 15740 | 848.98  | 12.59627 | 2 R.LLELAPTC chr2@6685  | 9.10E-19 | 0        |
| 8Mar2011- | 15337 | 747.39  | 13.7081  | 2 K.MLRFNEC chr2@8355   | 2.78E-10 | 0.007577 |
| 8Mar2011- | 1296  | 422.27  | 2.173301 | 2 K.IGKGEVLI chrX@1204  | 1.99E-10 | 0.005081 |
| 8Mar2011- | 15221 | 829.44  | 22.15469 | 2 R.FADLPFA chr2@1282   | 2.54E-11 | 0.001187 |
| 8Mar2011- | 13675 | 858.48  | 6.006088 | 3 _LETGIKPI Splice@chr  | 1.24E-12 | 0        |
| 8Mar2011- | 8806  | 725.88  | 19.33943 | 2 R.MEHLCRI Splice@chr  | 3.57E-10 | 0.009024 |
| 8Mar2011- | 16035 | 1167.56 | -16.7225 | 2 L.K+14.016 Splice@chr | 4.54E-12 | 2.97E-04 |
| 8Mar2011- | 17559 | 895.79  | 10.03186 | 3 _RELTEEDI Splice@chr  | 1.15E-11 | 4.17E-04 |
| 8Mar2011- | 11742 | 870.48  | 7.030425 | 1 K.ATTQRHF chr2@6975   | 1.89E-10 | 0.004772 |
| 8Mar2011- | 17557 | 634.84  | 6.410455 | 2 R.VDIGDILF Splice@chr | 5.29E-13 | 0        |
| 8Mar2011- | 3671  | 519.79  | 5.478159 | 2 K.SIYGLEISF chr1@4967 | 4.23E-10 | 0.00875  |
| 8Mar2011- | 14971 | 849.48  | 10.61812 | 2 R.LLELAPTC chr2@6685  | 5.14E-18 | 0        |
| 8Mar2011- | 2947  | 473.59  | -27.9823 | 3 R.AGTTRTS chrX@4354   | 4.47E-10 | 0.009416 |
| 8Mar2011- | 1306  | 446.28  | 11.92556 | 2 R.HLALPNV chr5@8698   | 1.16E-10 | 0.003273 |
| 8Mar2011- | 16504 | 895.78  | -1.06827 | 3 _RELTEEDI Splice@chr  | 6.31E-12 | 0        |
| 8Mar2011- | 16882 | 895.79  | 10.03186 | 3 _RELTEEDI Splice@chr  | 4.60E-12 | 0        |
| 8Mar2011- | 4885  | 741.39  | -17.2291 | 2 K.QKSNWH chr5@1229    | 2.53E-11 | 6.88E-04 |
| 8Mar2011- | 6801  | 534.32  | 13.11853 | 2 K.TNIYTILTI chr5@1329 | 2.09E-10 | 0.005345 |
| 8Mar2011- | 16384 | 987.5   | -5.85708 | 3 K.KYLFLDNI chr4@1288  | 1.13E-10 | 0.003273 |
| 8Mar2011- | 9260  | 440.24  | 24.04044 | 2 R.YNRAPM chr5@4305    | 1.44E-10 | 0.003604 |
| 8Mar2011- | 9965  | 1075.06 | -6.79295 | 2 R.TCSK+14. chr2@1253  | 2.77E-10 | 0.005963 |
| 8Mar2011- | 5210  | 741.39  | -17.2291 | 2 K.QKSNWH chr5@1229    | 4.44E-11 | 0.001204 |
| 8Mar2011- | 626   | 743.48  | 2.794988 | 1 K.KIGGAGII chr1@2883  | 8.66E-11 | 0.002694 |
| 8Mar2011- | 18887 | 688.75  | 8.895763 | 5 R.FQSAAIG Splice@chr  | 9.96E-12 | 1.48E-04 |
| 8Mar2011- | 11176 | 694.54  | 11.7794  | 5 _HTGPGVI Splice@chr   | 3.32E-10 | 0.007184 |
| 8Mar2011- | 1887  | 693.34  | -20.6862 | 2 R.M+15.99 chr4@1237   | 9.48E-11 | 0.003062 |
| 8Mar2011- | 10309 | 657.04  | -26.9179 | 3 R.GNVRK+1 chrX@7490   | 3.82E-10 | 0.007739 |

|           |       |         |          |                         |          |          |
|-----------|-------|---------|----------|-------------------------|----------|----------|
| 8Mar2011- | 2917  | 533.26  | 4.128259 | 2 G.FGGGGIS chr2@5085   | 2.24E-10 | 0.005444 |
| 8Mar2011- | 16364 | 965.49  | -9.59113 | 2 _RFAEFAG chr2@1518    | 1.83E-11 | 5.64E-04 |
| 8Mar2011- | 9512  | 886     | 3.172487 | 2 F.ENVVEVII Splice@chr | 7.19E-13 | 0        |
| 8Mar2011- | 4828  | 741.39  | -17.2291 | 2 K.QKSNWH chr5@1229    | 4.14E-11 | 0.001071 |
| 8Mar2011- | 5154  | 741.39  | -17.2291 | 2 K.QKSNWH chr5@1229    | 4.45E-11 | 0.001204 |
| 8Mar2011- | 18921 | 860.69  | 14.08015 | 4 R.FQSAAIG Splice@chr  | 2.60E-13 | 0        |
| 8Mar2011- | 17688 | 737.88  | -5.09604 | 2 K.KPMEILYI chr1@8387  | 2.94E-10 | 0.005963 |
| 8Mar2011- | 1351  | 446.28  | 11.92556 | 2 R.HLALPNV chr5@8698   | 2.65E-10 | 0.005763 |
| 8Mar2011- | 16846 | 895.78  | -1.06827 | 3 _RELTEEDI Splice@chr  | 1.35E-11 | 4.30E-04 |
| 8Mar2011- | 6634  | 533.82  | 16.26677 | 2 K.TNIYTILTI chr5@1329 | 2.29E-10 | 0.005444 |
| 8Mar2011- | 5554  | 748.4   | -14.2094 | 2 K.QKSNWH chr5@1229    | 4.23E-11 | 0.001071 |
| 8Mar2011- | 9561  | 886     | 3.172487 | 2 F.ENVVEVII Splice@chr | 3.93E-13 | 0        |
| 8Mar2011- | 10757 | 671.37  | -24.0361 | 2 T.FNIVHTQ Splice@chr  | 2.26E-10 | 0.005444 |
| 8Mar2011- | 5425  | 626.3   | -9.76097 | 2 R.LCESGAA Splice@chr  | 3.00E-16 | 0        |
| 8Mar2011- | 4776  | 741.39  | -17.2291 | 2 K.QKSNWH chr5@1229    | 5.31E-11 | 0.001583 |
| 8Mar2011- | 342   | 743.45  | 11.42713 | 1 R.GIAGALN Splice@chr  | 5.72E-11 | 0.001697 |
| 8Mar2011- | 4947  | 741.39  | -17.2291 | 2 K.QKSNWH chr5@1229    | 2.88E-11 | 8.19E-04 |
| 8Mar2011- | 12208 | 838.94  | -22.1914 | 2 R.QFADLPS chr5@1898   | 3.09E-10 | 0.006663 |
| 8Mar2011- | 6762  | 870.51  | 4.219085 | 1 K.IQKMPPF chrX@1229   | 4.67E-10 | 0.00974  |
| 8Mar2011- | 13537 | 1153.23 | -17.5731 | 3 F.EGIRTGG Splice@chr  | 3.54E-16 | 0        |
| 8Mar2011- | 3583  | 447.74  | -24.0456 | 2 K.IIYDGSVK chrX@2516  | 2.90E-10 | 0.005963 |
| 8Mar2011- | 16549 | 1003.19 | 17.13413 | 3 R.CWNRRA Splice@chr   | 1.19E-12 | 0        |
| 8Mar2011- | 17565 | 805.47  | -13.7324 | 2 K.TPIFIPAP chr5@1861  | 6.49E-12 | 0        |
| 8Mar2011- | 19376 | 1175.13 | 14.90082 | 2 K.INWAVTI chr4@2890   | 1.32E-21 | 0        |
| 8Mar2011- | 19371 | 783.75  | 7.307848 | 3 K.INWAVTI chr4@2890   | 1.32E-13 | 0        |
| 8Mar2011- | 13664 | 563.87  | -6.34728 | 2 R.QNK+14. Splice@chr  | 3.82E-10 | 0.007739 |
| 8Mar2011- | 6268  | 693.87  | -6.6949  | 2 V.ICVAVGD chr5@1065   | 1.15E-10 | 0.003273 |
| 8Mar2011- | 12658 | 607     | -9.70672 | 3 I.NRFNISK chrX@1250   | 1.09E-10 | 0.003273 |
| 8Mar2011- | 6431  | 434.24  | 13.9946  | 3 _RSNDQTI chr5@6378    | 3.22E-10 | 0.006991 |
| 8Mar2011- | 11179 | 1156.9  | 16.3571  | 3 _HTGPGVI Splice@chr   | 2.02E-14 | 0        |
| 8Mar2011- | 11745 | 1156.9  | 16.3571  | 3 _HTGPGVI Splice@chr   | 3.76E-18 | 0        |
| 8Mar2011- | 19018 | 1028.07 | 1.338806 | 2 K.LFVCVLG chr2@7808   | 1.52E-10 | 0.00452  |
| 8Mar2011- | 16651 | 895.78  | -1.06827 | 3 _RELTEEDI Splice@chr  | 1.00E-11 | 3.36E-04 |
| 8Mar2011- | 2990  | 562.31  | -13.4391 | 2 R.FYLLYLYK Splice@chr | 5.28E-11 | 0.001659 |
| 8Mar2011- | 2704  | 452.23  | -1.48793 | 2 R.SGEPLSA Splice@chr  | 2.41E-11 | 9.57E-04 |
| 8Mar2011- | 12435 | 1156.9  | 16.3571  | 3 _HTGPGVI Splice@chr   | 2.34E-13 | 0        |
| 8Mar2011- | 9441  | 509.3   | -20.473  | 2 R.SSVIMLIV chr2@5767  | 5.47E-11 | 0.001659 |
| 8Mar2011- | 792   | 743.48  | 2.794988 | 1 K.KIGGAGII chr1@2885  | 8.66E-11 | 0.00249  |
| 8Mar2011- | 17818 | 634.84  | 6.410455 | 2 R.VDIGDILF Splice@chr | 3.36E-12 | 0        |
| 8Mar2011- | 15257 | 848.97  | 0.791766 | 2 R.LLELAPTC chr2@6685  | 4.35E-16 | 0        |
| 8Mar2011- | 2796  | 452.23  | -1.48793 | 2 R.SGEPLSA Splice@chr  | 1.49E-11 | 4.90E-04 |
| 8Mar2011- | 5457  | 741.39  | -17.2291 | 2 K.QKSNWH chr5@1229    | 1.12E-10 | 0.003459 |
| 8Mar2011- | 10001 | 886     | 3.172487 | 2 F.ENVVEVII Splice@chr | 1.98E-12 | 0        |
| 8Mar2011- | 13202 | 1005.16 | -21.3951 | 3 L.LTTCNRRI Splice@chr | 4.34E-11 | 0.001532 |
| 8Mar2011- | 5869  | 741.39  | -17.2291 | 2 K.QKSNWH chr5@1229    | 1.04E-11 | 3.36E-04 |
| 8Mar2011- | 3480  | 533.26  | 4.128259 | 2 G.FGGGGIS chr2@5085   | 9.72E-11 | 0.002751 |
| 8Mar2011- | 11055 | 583.83  | -11.3703 | 2 R.LVPITFS chr1@2422   | 2.75E-10 | 0.00826  |

|           |       |         |          |                         |          |          |
|-----------|-------|---------|----------|-------------------------|----------|----------|
| 8Mar2011- | 19234 | 860.69  | 14.08015 | 4 R.FQSAAIG Splice@chr  | 4.48E-12 | 0        |
| 8Mar2011- | 5568  | 741.39  | -17.2291 | 2 K.QKSNWH chr5@1229    | 2.83E-11 | 0.001237 |
| 8Mar2011- | 2902  | 915.47  | 1.201399 | 1 K.FHEIGGQ chrX@4727   | 3.20E-11 | 0.001237 |
| 8Mar2011- | 2750  | 452.23  | -1.48793 | 2 R.SGEPLSA: Splice@chr | 2.68E-11 | 0.00111  |
| 8Mar2011- | 2608  | 452.23  | -1.48793 | 2 R.SGEPLSA: Splice@chr | 3.82E-11 | 0.001237 |
| 8Mar2011- | 5511  | 741.39  | -17.2291 | 2 K.QKSNWH chr5@1229    | 2.32E-11 | 9.57E-04 |
| 8Mar2011- | 15292 | 669.36  | -13.2955 | 2 K.LEFNISK chr1@1931   | 1.80E-11 | 4.90E-04 |
| 8Mar2011- | 723   | 743.48  | 2.794988 | 1 K.KIGGAGII chr1@2885  | 8.66E-11 | 0.00249  |
| 8Mar2011- | 9983  | 663.85  | -5.06443 | 2 N.KMIFSMI chr4@8622   | 2.13E-10 | 0.006743 |
| 8Mar2011- | 2846  | 452.23  | -1.48793 | 2 R.SGEPLSA: Splice@chr | 6.50E-11 | 0.002092 |
| 8Mar2011- | 13081 | 1030.52 | 12.84278 | 2 L.SPIPEVPC Splice@chr | 5.14E-17 | 0        |
| 8Mar2011- | 16459 | 665.37  | -26.6417 | 2 Q.INNK+14 Splice@chr  | 2.85E-10 | 0.008385 |
| 8Mar2011- | 13982 | 1182.57 | -12.6646 | 1 R.RFAENQI chr5@1779   | 3.28E-11 | 0.001237 |
| 8Mar2011- | 16580 | 987.5   | -5.85708 | 3 K.KYLFLDNI chr4@1288  | 5.78E-11 | 0.001659 |
| 8Mar2011- | 19739 | 783.75  | 7.307848 | 3 K.INWAVTI chr4@2890   | 3.15E-13 | 0        |
| 8Mar2011- | 5805  | 741.39  | -17.2291 | 2 K.QKSNWH chr5@1229    | 3.64E-11 | 0.001237 |
| 8Mar2011- | 2655  | 452.23  | -1.48793 | 2 R.SGEPLSA: Splice@chr | 8.22E-11 | 0.00249  |
| 8Mar2011- | 9141  | 1137.65 | -15.1425 | 1 Q.FLVISFA\ chrX@1232  | 2.75E-10 | 0.00826  |
| 8Mar2011- | 17840 | 805.47  | -13.7324 | 2 K.TPIFIPAP: chr5@1861 | 1.05E-10 | 0.002751 |
| 8Mar2011- | 9509  | 1017.59 | -22.5744 | 1 R.SSVIMLIV chr2@5767  | 2.19E-10 | 0.006871 |
| 8Mar2011- | 9391  | 509.3   | -20.473  | 2 R.SSVIMLIV chr2@5767  | 4.54E-11 | 0.001532 |
| 8Mar2011- | 17081 | 895.78  | -1.06827 | 3 _RELTEEDI Splice@chr  | 6.51E-12 | 1.72E-04 |
| 8Mar2011- | 14774 | 829.44  | 22.15469 | 2 R.FADLPFA chr2@1282   | 2.46E-10 | 0.007638 |
| 8Mar2011- | 9498  | 509.3   | -20.473  | 2 R.SSVIMLIV chr2@5767  | 2.75E-10 | 0.00826  |
| 8Mar2011- | 6133  | 979.49  | 11.24178 | 1 _NLQNGN chr2@1080     | 8.58E-11 | 0.00249  |
| 8Mar2011- | 4374  | 510.27  | -20.0146 | 2 R.STLSIFSH chr1@1111  | 1.45E-10 | 0.00452  |
| 8Mar2011- | 1496  | 743.44  | -2.05524 | 1 R.GIAGALN Splice@chr  | 4.37E-11 | 0.001532 |
| 8Mar2011- | 2952  | 459.74  | 26.97556 | 2 _ERQNGG chr1@1431     | 5.09E-11 | 0.001659 |
| 8Mar2011- | 9928  | 1017.59 | -22.5744 | 1 R.SSVIMLIV chr2@5767  | 1.84E-10 | 0.007658 |
| 8Mar2011- | 14805 | 563.87  | -6.34728 | 2 R.QNK+14: Splice@chr  | 1.11E-10 | 0.005005 |
| 8Mar2011- | 18423 | 1173.13 | 0.131152 | 2 K.YLGAYLL\ Splice@chr | 7.20E-11 | 0.00337  |
| 8Mar2011- | 5792  | 741.39  | -17.2291 | 2 K.QKSNWH chr5@1229    | 2.48E-11 | 0.001191 |
| 8Mar2011- | 2726  | 446.77  | 19.99118 | 2 R.PVFSITTK chrX@1588  | 2.59E-10 | 0.009788 |
| 8Mar2011- | 13891 | 1030.52 | 12.84278 | 2 L.SPIPEVPC Splice@chr | 2.16E-18 | 0        |
| 8Mar2011- | 5731  | 741.39  | -17.2291 | 2 K.QKSNWH chr5@1229    | 3.70E-11 | 0.001597 |
| 8Mar2011- | 12026 | 671.37  | -24.0361 | 2 T.FNIVHTQ Splice@chr  | 2.29E-10 | 0.009458 |
| 8Mar2011- | 18956 | 805.47  | -13.7324 | 2 K.TPIFIPAP: chr5@1861 | 8.74E-11 | 0.003883 |
| 8Mar2011- | 12627 | 880.97  | 21.43304 | 2 A.HRK+14: chr5@1438   | 2.33E-10 | 0.009458 |
| 8Mar2011- | 18260 | 895.79  | 10.03186 | 3 _RELTEEDI Splice@chr  | 5.60E-12 | 3.29E-04 |
| 8Mar2011- | 13945 | 1030.52 | 12.84278 | 2 L.SPIPEVPC Splice@chr | 1.00E-16 | 0        |
| 8Mar2011- | 17829 | 895.78  | -1.06827 | 3 _RELTEEDI Splice@chr  | 8.14E-13 | 1.69E-04 |
| 8Mar2011- | 10028 | 509.3   | -20.473  | 2 R.SSVIMLIV chr2@5767  | 7.35E-11 | 0.00337  |
| 8Mar2011- | 16194 | 848.98  | 12.59627 | 2 R.LLELAPTC chr2@6685  | 3.94E-17 | 0        |
| 8Mar2011- | 6101  | 741.39  | -17.2291 | 2 K.QKSNWH chr5@1229    | 3.94E-11 | 0.001597 |
| 8Mar2011- | 1464  | 422.27  | 2.173301 | 2 K.IGKGEVLI chrX@1204  | 1.02E-10 | 0.004387 |
| 8Mar2011- | 5676  | 741.39  | -17.2291 | 2 K.QKSNWH chr5@1229    | 3.83E-11 | 0.001597 |
| 8Mar2011- | 9972  | 509.3   | -20.473  | 2 R.SSVIMLIV chr2@5767  | 7.44E-11 | 0.00337  |

|           |       |         |          |                         |          |          |
|-----------|-------|---------|----------|-------------------------|----------|----------|
| 8Mar2011- | 19610 | 909.82  | -3.91826 | 3 Y.FRLQGSIL chrX@950   | 1.88E-10 | 0.008258 |
| 8Mar2011- | 8622  | 435.25  | -4.00582 | 2 K.KISAHGTI chr4@172   | 9.87E-11 | 0.004387 |
| 8Mar2011- | 9918  | 509.3   | -20.473  | 2 R.SSVIMLIV chr2@576   | 3.76E-11 | 0.001597 |
| 8Mar2011- | 4136  | 404.54  | 22.99087 | 3 R.CAPSKST chr1@356    | 7.71E-11 | 0.003636 |
| 8Mar2011- | 7133  | 759.41  | 13.03771 | 1 K.TAAGGT chrX@169     | 2.04E-11 | 0.001058 |
| 8Mar2011- | 18988 | 634.84  | 6.410455 | 2 R.VDIGDILF Splice@chr | 6.45E-13 | 1.69E-04 |
| 8Mar2011- | 3126  | 459.74  | 26.97556 | 2 _ERQNGG chr1@143      | 4.15E-11 | 0.001736 |
| 8Mar2011- | 2932  | 452.23  | -1.48793 | 2 R.SGEPLSA Splice@chr  | 3.41E-11 | 0.001597 |
| 8Mar2011- | 1498  | 422.27  | 2.173301 | 2 K.IGKGEVLI chrX@120   | 2.01E-10 | 0.008258 |
| 8Mar2011- | 10583 | 663.85  | -5.06443 | 2 N.KMIFSMI chr4@862    | 1.98E-10 | 0.008258 |
| 8Mar2011- | 14054 | 858.48  | 6.006088 | 3 _LETGIKPI Splice@chr  | 2.40E-13 | 0        |
| 8Mar2011- | 12071 | 748.73  | -12.625  | 3 R.LPSKENL chr4@563    | 2.49E-10 | 0.009788 |
| 8Mar2011- | 11912 | 671.37  | -24.0361 | 2 T.FNIVHTQ Splice@chr  | 2.51E-10 | 0.009788 |
| 8Mar2011- | 16228 | 669.36  | -13.2955 | 2 K.LEFNISKI chr1@193   | 1.48E-11 | 7.76E-04 |
| 8Mar2011- | 8190  | 455.25  | 8.8683   | 3 K.LEAKGGC chr5@129    | 2.36E-10 | 0.009458 |
| 8Mar2011- | 5298  | 1068.57 | 23.06472 | 1 R.FMRGAA chr1@801     | 2.56E-10 | 0.009788 |
| 8Mar2011- | 7193  | 759.42  | 26.23637 | 1 K.TAAGGT chrX@169     | 2.50E-10 | 0.009788 |
| 8Mar2011- | 21143 | 1175.12 | 6.371728 | 2 K.INWAVTI chr4@289    | 7.07E-24 | 0        |
| 8Mar2011- | 5722  | 494.6   | -1.40142 | 3 K.FPENRHI chr2@147    | 2.00E-10 | 0.008258 |
| 8Mar2011- | 20532 | 860.69  | 14.08015 | 4 R.FQSAAIG Splice@chr  | 8.59E-16 | 0        |
| 8Mar2011- | 12570 | 881.47  | 19.52679 | 2 A.HRK+14 chr5@143     | 1.82E-10 | 0.007658 |
| 8Mar2011- | 19597 | 795.66  | -2.97654 | 4 K.SGTIFDNI Splice@chr | 2.56E-13 | 0        |
| 8Mar2011- | 7957  | 717.89  | -17.2831 | 2 K.LRGWKN chr3@888     | 1.56E-10 | 0.006916 |
| 8Mar2011- | 951   | 535.3   | -2.45636 | 2 K.ENKVKHC chrX@950    | 7.29E-11 | 0.00337  |
| 8Mar2011- | 18222 | 895.79  | 10.03186 | 3 _RELTEEDI Splice@chr  | 5.70E-12 | 3.29E-04 |
| 8Mar2011- | 2979  | 452.23  | -1.48793 | 2 R.SGEPLSA Splice@chr  | 2.66E-11 | 0.001191 |
| 8Mar2011- | 14821 | 1182.57 | -12.6646 | 1 R.RFAENQI chr5@177    | 2.35E-10 | 0.009458 |
| 8Mar2011- | 3028  | 452.23  | -1.48793 | 2 R.SGEPLSA Splice@chr  | 2.45E-11 | 0.001191 |
| 8Mar2011- | 20013 | 996.87  | -23.3576 | 3 S.VPFSK+1 Splice@chr  | 3.63E-11 | 0.001597 |
| 8Mar2011- | 15644 | 829.44  | 22.15469 | 2 R.FADLPFA chr2@128    | 2.92E-11 | 0.001334 |
| 8Mar2011- | 21136 | 783.75  | 7.307848 | 3 K.INWAVTI chr4@289    | 6.31E-14 | 0        |
| 8Mar2011- | 11394 | 657.04  | -26.9179 | 3 R.GNVRK+1 chrX@749    | 7.37E-11 | 0.00337  |
| 8Mar2011- | 19072 | 634.84  | 6.410455 | 2 R.VDIGDILF Splice@chr | 1.81E-12 | 1.52E-04 |
| 8Mar2011- | 17012 | 732.07  | 19.51873 | 3 R.ATDDWII Splice@chr  | 1.35E-10 | 0.003628 |
| 8Mar2011- | 20935 | 960.49  | -5.15365 | 3 N.GFEPLA Splice@chr   | 1.43E-11 | 4.09E-04 |
| 8Mar2011- | 6049  | 741.39  | -17.2291 | 2 K.QKSNWH chr5@122     | 5.03E-11 | 0.001376 |
| 8Mar2011- | 14332 | 516.31  | 23.5317  | 3 R.NIIFLMVI chrX@129   | 1.27E-10 | 0.003628 |
| 8Mar2011- | 1765  | 843.53  | -0.36222 | 1 K.IGKGEVLI chrX@120   | 1.01E-10 | 0.003113 |
| 8Mar2011- | 12562 | 1156.56 | 11.5499  | 3 _HTGPGVI Splice@chr   | 1.23E-12 | 0        |
| 8Mar2011- | 5272  | 864.38  | 14.63385 | 1 R.EDWGM chr5@665      | 4.10E-12 | 1.52E-04 |
| 8Mar2011- | 19503 | 792.15  | -18.5783 | 4 K.SGTIFDNI Splice@chr | 3.27E-17 | 0        |
| 8Mar2011- | 12093 | 671.37  | -24.0361 | 2 T.FNIVHTQ Splice@chr  | 3.11E-10 | 0.006998 |
| 8Mar2011- | 9030  | 695.42  | -0.61526 | 1 R.GAGIHIK chrX@740    | 4.79E-10 | 0.009487 |
| 8Mar2011- | 18034 | 987.51  | 4.289691 | 3 K.KYLFLDNI chr4@128   | 1.11E-10 | 0.00345  |
| 8Mar2011- | 17146 | 930.03  | 22.25253 | 2 _DTYYSNK chr2@698     | 2.11E-10 | 0.00432  |
| 8Mar2011- | 13944 | 855.41  | -22.1447 | 2 _HVQEVAI Splice@chr   | 4.11E-10 | 0.008267 |
| 8Mar2011- | 8212  | 1025.61 | -11.6755 | 1 K.LGLGSGL chr5@494    | 2.66E-11 | 0.001136 |

|           |       |         |          |                          |          |          |
|-----------|-------|---------|----------|--------------------------|----------|----------|
| 8Mar2011- | 14017 | 1030.52 | 12.84278 | 2 L.SPIEVPC Splice@chr   | 9.82E-19 | 0        |
| 8Mar2011- | 20626 | 688.75  | 8.895763 | 5 R.FQSAAIG Splice@chr   | 2.19E-11 | 7.94E-04 |
| 8Mar2011- | 15908 | 774.66  | -19.9593 | 4 _ .NETGLNK chr3@7952   | 4.51E-10 | 0.008983 |
| 8Mar2011- | 19131 | 805.47  | -13.7324 | 2 K.TPIFIPAP: chr5@1861  | 1.00E-11 | 2.78E-04 |
| 8Mar2011- | 14165 | 597.84  | -17.0587 | 4 K.LIQVFTNI chr3@7214   | 3.68E-10 | 0.007454 |
| 8Mar2011- | 6424  | 741.39  | -17.2291 | 2 K.QKSNWH chr5@1229     | 3.92E-11 | 0.001136 |
| 8Mar2011- | 1727  | 502.26  | 17.41275 | 2 R.EENEELLI chr5@1422   | 2.33E-10 | 0.005066 |
| 8Mar2011- | 6107  | 741.39  | -17.2291 | 2 K.QKSNWH chr5@1229     | 4.88E-11 | 0.001376 |
| 8Mar2011- | 17941 | 895.78  | -1.06827 | 3 _ .RELTEEDI Splice@chr | 3.79E-12 | 1.52E-04 |
| 8Mar2011- | 17719 | 665.37  | -26.6417 | 2 Q.INNK+14 Splice@chr   | 3.16E-10 | 0.007105 |
| 8Mar2011- | 13962 | 1030.52 | 12.84278 | 2 L.SPIEVPC Splice@chr   | 2.39E-17 | 0        |
| 8Mar2011- | 19616 | 795.66  | -2.97654 | 4 K.SGTIFDNI Splice@chr  | 4.51E-14 | 0        |
| 8Mar2011- | 4780  | 510.78  | 4.430039 | 2 L.TYATQLP: chr1@1227   | 5.00E-10 | 0.00989  |
| 8Mar2011- | 4529  | 439.91  | 17.33685 | 3 K.NSQKNPI chr2@3540    | 6.64E-11 | 0.001601 |
| 8Mar2011- | 8131  | 717.89  | -17.2831 | 2 K.LRGWNK chr3@8881     | 9.13E-11 | 0.002402 |
| 8Mar2011- | 16313 | 848.97  | 0.791766 | 2 R.LLELAPT: chr2@6685   | 1.21E-17 | 0        |
| 8Mar2011- | 12846 | 744.38  | 1.067376 | 2 R.WGDHGF Splice@chr    | 2.80E-10 | 0.006154 |
| 8Mar2011- | 3705  | 557.84  | 24.08391 | 2 R.EVIKHFN: chrX@9231   | 2.93E-10 | 0.006469 |
| 8Mar2011- | 3512  | 915.47  | 1.201399 | 1 K.FHEIGGQ chrX@4727    | 1.39E-10 | 0.003628 |
| 8Mar2011- | 11563 | 657.04  | -26.9179 | 3 R.GNVRK+1 chrX@7490    | 5.08E-10 | 0.009985 |
| 8Mar2011- | 9417  | 560.6   | -22.2499 | 3 _ .EMFSAA\ chr4@3419   | 1.03E-10 | 0.003229 |
| 8Mar2011- | 1073  | 419.23  | -7.22396 | 2 R.RSPELVH chr5@4179    | 3.34E-10 | 0.007169 |
| 8Mar2011- | 18464 | 1013.54 | -22.3432 | 3 K.ACLNVTY chr4@4860    | 1.17E-10 | 0.003628 |
| 8Mar2011- | 17781 | 965.48  | -19.9748 | 2 _ .RFAEFAG chr2@1518   | 1.82E-10 | 0.004104 |
| 8Mar2011- | 10720 | 886     | 3.172487 | 2 F.ENVVEVII Splice@chr  | 1.47E-12 | 0        |
| 8Mar2011- | 1773  | 422.27  | 2.173301 | 2 K.IGKGEVLI chrX@1204   | 2.00E-10 | 0.004104 |
| 8Mar2011- | 21181 | 1175.13 | 14.90082 | 2 K.INWAVTI chr4@2890    | 5.86E-24 | 0        |
| 8Mar2011- | 17600 | 746.91  | 13.99266 | 2 V.EK+14.01 chrX@6709   | 7.39E-12 | 2.78E-04 |
| 8Mar2011- | 19640 | 1060.54 | -6.74128 | 3 K.SGTIFDNI Splice@chr  | 1.56E-13 | 0        |
| 8Mar2011- | 6048  | 494.59  | -21.6808 | 3 K.FPENRHI: chr2@1477   | 5.09E-10 | 0.009985 |
| 8Mar2011- | 11411 | 601.32  | -15.224  | 3 K.QFLTFLT: chr4@7690   | 3.24E-10 | 0.007169 |
| 8Mar2011- | 3394  | 459.74  | 26.97556 | 2 _ .ERQNGG: chr1@1431   | 5.09E-11 | 0.001376 |
| 8Mar2011- | 11799 | 661.4   | -2.4954  | 2 K.LVLIAVN1 chr1@6528   | 4.54E-10 | 0.009086 |
| 8Mar2011- | 19043 | 805.97  | -15.8175 | 2 K.TPIFIPAP: chr5@1861  | 3.06E-11 | 0.001136 |
| 8Mar2011- | 16335 | 669.35  | -28.2834 | 2 K.LEFNISK: chr1@1931   | 2.87E-11 | 0.001136 |
| 8Mar2011- | 7718  | 533.82  | 16.26677 | 2 K.TNIYTILTI chr5@1329  | 1.76E-10 | 0.004023 |
| 8Mar2011- | 5570  | 571.99  | 18.36266 | 3 K.KNSIFQP: chr1@2570   | 3.96E-10 | 0.007968 |
| 8Mar2011- | 1734  | 843.53  | -0.36222 | 1 K.IGKGEVLI chrX@1204   | 4.78E-10 | 0.009487 |
| 8Mar2011- | 1738  | 422.27  | 2.173301 | 2 K.IGKGEVLI chrX@1204   | 2.02E-10 | 0.004216 |
| 8Mar2011- | 3193  | 418.9   | 25.99843 | 3 K.KNSLFVA chr3@5347    | 4.84E-10 | 0.009487 |
| 8Mar2011- | 6626  | 626.3   | -9.76097 | 2 R.LCESGAA Splice@chr   | 3.03E-16 | 0        |
| 8Mar2011- | 21176 | 783.75  | 7.307848 | 3 K.INWAVTI chr4@2890    | 1.40E-15 | 0        |
| 8Mar2011- | 1776  | 748.36  | 16.41564 | 1 R.ATAGDGI chr3@5843    | 3.04E-12 | 1.52E-04 |
| 8Mar2011- | 7561  | 434.24  | 13.9946  | 3 _ .RSNDQTI chr5@6378   | 2.34E-10 | 0.005066 |
| 8Mar2011- | 3443  | 459.74  | 26.97556 | 2 _ .ERQNGG: chr1@1431   | 4.12E-11 | 0.001136 |
| 8Mar2011- | 4050  | 572.34  | 3.797676 | 2 R.TLGTGLR chrX@1517    | 3.44E-10 | 0.007361 |
| 8Mar2011- | 10775 | 897.42  | -27.6753 | 3 _ .QVREMH Splice@chr   | 1.07E-10 | 0.003337 |

|           |       |         |          |                         |          |          |
|-----------|-------|---------|----------|-------------------------|----------|----------|
| 8Mar2011- | 19122 | 634.84  | 6.410455 | 2 R.VDIGDILF Splice@chr | 1.52E-11 | 4.09E-04 |
| 8Mar2011- | 19659 | 795.66  | -2.97654 | 4 K.SGTIFDNI Splice@chr | 1.00E-13 | 0        |
| 8Mar2011- | 14146 | 858.48  | 6.006088 | 3 _LETGIKPI Splice@chr  | 3.69E-13 | 0        |
| 8Mar2011- | 5999  | 741.39  | -17.2291 | 2 K.QKSNWH chr5@1229    | 9.44E-11 | 0.002402 |
| 8Mar2011- | 11984 | 671.37  | -24.0361 | 2 T.FNIVHTQ Splice@chr  | 3.96E-10 | 0.007968 |
| 8Mar2011- | 4206  | 510.81  | 29.2442  | 2 R.RHVAYVF chr1@1479   | 4.94E-10 | 0.009693 |
| 8Mar2011- | 94    | 420.22  | -19.7277 | 2 K.KNAQNH chr2@1322    | 4.26E-10 | 0.008474 |
| 8Mar2011- | 12580 | 881.92  | -2.80647 | 2 F.LQEQGTY Splice@chr  | 2.26E-12 | 1.52E-04 |
| 8Mar2011- | 15688 | 829.44  | 22.15469 | 2 R.FADLPFA chr2@1282   | 1.72E-10 | 0.004023 |
| 8Mar2011- | 12095 | 1156.56 | 11.5499  | 3 _HTGPGVI Splice@chr   | 2.21E-14 | 0        |
| 8Mar2011- | 12208 | 881.92  | -2.80647 | 2 F.LQEQGTY Splice@chr  | 7.28E-11 | 0.003703 |
| 8Mar2011- | 15810 | 855.46  | -13.7147 | 3 R.RVKYQKI chr2@6154   | 2.90E-10 | 0.009231 |
| 8Mar2011- | 12930 | 801.71  | 5.720343 | 3 K.FFKPNTD chr5@7527   | 1.64E-15 | 0        |
| 8Mar2011- | 10642 | 1162.23 | 14.80982 | 3 _HTGPGVI Splice@chr   | 3.40E-12 | 0        |
| 8Mar2011- | 6401  | 626.3   | -9.76097 | 2 R.LCESGAA Splice@chr  | 6.11E-16 | 0        |
| 8Mar2011- | 1190  | 748.36  | 16.41564 | 1 R.ATAGDGI chr3@5845   | 2.04E-10 | 0.007654 |
| 8Mar2011- | 16716 | 895.78  | -1.06827 | 3 _RELTEEDI Splice@chr  | 7.15E-13 | 0        |
| 8Mar2011- | 14381 | 737.35  | -6.11443 | 4 R.NAEAAAI Splice@chr  | 1.41E-11 | 7.19E-04 |
| 8Mar2011- | 2661  | 608.27  | 3.316799 | 1 R.FGAGAD chr1@3416    | 2.09E-10 | 0.007791 |
| 8Mar2011- | 7255  | 693.87  | -6.6949  | 2 V.ICVAVGD chr5@1065   | 1.03E-10 | 0.004573 |
| 8Mar2011- | 15613 | 1167.56 | -16.7225 | 2 L.K+14.016 Splice@chr | 1.83E-11 | 0.001059 |
| 8Mar2011- | 11237 | 654.84  | 19.3238  | 2 K.KMTDETI Splice@chr  | 3.04E-10 | 0.009757 |
| 8Mar2011- | 14610 | 888.47  | 22.8338  | 2 K.DITLEVEA Splice@chr | 9.76E-13 | 0        |
| 8Mar2011- | 11759 | 748.73  | -12.625  | 3 R.LPSKENLI chr4@5639  | 2.26E-10 | 0.00818  |
| 8Mar2011- | 18090 | 860.69  | 14.08015 | 4 R.FQSAAIG Splice@chr  | 1.15E-13 | 0        |
| 8Mar2011- | 2703  | 608.27  | 3.316799 | 1 R.FGAGAD chr1@3416    | 2.57E-10 | 0.008551 |
| 8Mar2011- | 15633 | 899.47  | 5.842265 | 2 R.SK+14.01 chrX@1700  | 1.39E-10 | 0.005864 |
| 8Mar2011- | 5930  | 741.38  | -23.1647 | 2 K.FPENRHI chr2@1477   | 1.43E-10 | 0.006003 |
| 8Mar2011- | 9882  | 509.3   | -20.473  | 2 R.SSVIMLIV chr2@5767  | 5.16E-11 | 0.002653 |
| 8Mar2011- | 3765  | 510.3   | 12.8833  | 2 R.RHVAYVF chr1@1479   | 1.34E-10 | 0.005864 |
| 8Mar2011- | 5812  | 741.39  | -17.2291 | 2 K.QKSNWH chr5@1229    | 3.79E-11 | 0.001842 |
| 8Mar2011- | 5656  | 1107.57 | 7.060205 | 1 R.M+15.99 Splice@chr  | 2.68E-10 | 0.008683 |
| 8Mar2011- | 7695  | 534.32  | 13.11853 | 2 K.TNIYTILTI chr5@1329 | 1.77E-10 | 0.006973 |
| 8Mar2011- | 9890  | 1017.59 | -22.5744 | 1 R.SSVIMLIV chr2@5767  | 1.88E-11 | 0.001059 |
| 8Mar2011- | 1315  | 748.36  | 16.41564 | 1 R.ATAGDGI chr3@5845   | 1.32E-10 | 0.005724 |
| 8Mar2011- | 2912  | 452.23  | -1.48793 | 2 R.SGEPLSA Splice@chr  | 7.28E-11 | 0.003703 |
| 8Mar2011- | 1442  | 748.36  | 16.41564 | 1 R.ATAGDGI chr3@5845   | 1.14E-10 | 0.005006 |
| 8Mar2011- | 14170 | 1153.23 | -17.5731 | 3 F.EGIRTGG Splice@chr  | 2.77E-15 | 0        |
| 8Mar2011- | 2969  | 452.23  | -1.48793 | 2 R.SGEPLSA Splice@chr  | 1.53E-10 | 0.006282 |
| 8Mar2011- | 6530  | 748.39  | -27.6021 | 2 K.QKSNWH chr5@1229    | 1.20E-10 | 0.005303 |
| 8Mar2011- | 1451  | 843.53  | -0.36222 | 1 K.IGKGEVLI chrX@1204  | 2.01E-10 | 0.007654 |
| 8Mar2011- | 6457  | 626.3   | -9.76097 | 2 R.LCESGAA Splice@chr  | 8.83E-16 | 0        |
| 8Mar2011- | 1476  | 422.27  | 2.173301 | 2 K.IGKGEVLI chrX@1204  | 2.01E-10 | 0.007654 |
| 8Mar2011- | 5867  | 741.39  | -17.2291 | 2 K.QKSNWH chr5@1229    | 3.35E-11 | 0.001525 |
| 8Mar2011- | 14127 | 1153.23 | -17.5731 | 3 F.EGIRTGG Splice@chr  | 5.00E-15 | 0        |
| 8Mar2011- | 15338 | 848.97  | 0.791766 | 2 R.LLELAPTC chr2@6685  | 1.71E-17 | 0        |
| 8Mar2011- | 6480  | 748.39  | -27.6021 | 2 K.QKSNWH chr5@1229    | 7.99E-12 | 5.54E-04 |

|           |       |         |          |                         |          |          |
|-----------|-------|---------|----------|-------------------------|----------|----------|
| 8Mar2011- | 3643  | 692.34  | -2.47201 | 2 K.TAEHVEC Splice@chr  | 9.46E-14 | 0        |
| 8Mar2011- | 15351 | 562.31  | -5.65437 | 2 K.IIDFSKCIK chr1@9656 | 8.39E-11 | 0.003844 |
| 8Mar2011- | 13414 | 1030.51 | 3.115089 | 2 L.SPIPEVPC Splice@chr | 3.48E-19 | 0        |
| 8Mar2011- | 18389 | 783.75  | 7.307848 | 3 K.INWAVTI chr4@2890   | 2.99E-14 | 0        |
| 8Mar2011- | 18391 | 1175.12 | 6.371728 | 2 K.INWAVTI chr4@2890   | 2.42E-21 | 0        |
| 8Mar2011- | 15704 | 899.47  | 5.842265 | 2 R.SKNK+14 chrX@1700   | 3.04E-10 | 0.009757 |
| 8Mar2011- | 5135  | 548.28  | -5.99626 | 4 R.KVDK+14 chr3@5261   | 1.81E-10 | 0.007415 |
| 8Mar2011- | 6998  | 640.81  | -21.5267 | 2 K.FETFFVSF chr1@6740  | 2.24E-10 | 0.008042 |
| 8Mar2011- | 16438 | 895.78  | -1.06827 | 3 _RELTEEDI Splice@chr  | 3.50E-13 | 0        |
| 8Mar2011- | 10419 | 663.85  | -5.06443 | 2 N.KMIFSMI chr4@8622   | 1.49E-10 | 0.00613  |
| 8Mar2011- | 12158 | 881.92  | -2.80647 | 2 F.LQEQGTY Splice@chr  | 1.11E-11 | 7.19E-04 |
| 8Mar2011- | 16480 | 895.78  | -1.06827 | 3 _RELTEEDI Splice@chr  | 3.97E-12 | 0        |
| 8Mar2011- | 1550  | 748.36  | 16.41564 | 1 R.ATAGDGI chr3@5843   | 3.04E-12 | 0        |
| 8Mar2011- | 17222 | 805.47  | -13.7324 | 2 K.TPIFIPAP chr5@1861  | 1.65E-10 | 0.006704 |
| 8Mar2011- | 9845  | 1017.59 | -22.5744 | 1 R.SSVIMLIV chr2@5767  | 6.88E-11 | 0.003257 |
| 8Mar2011- | 1267  | 748.36  | 16.41564 | 1 R.ATAGDGI chr3@5843   | 1.56E-12 | 0        |
| 8Mar2011- | 1474  | 748.36  | 16.41564 | 1 R.ATAGDGI chr3@5843   | 3.04E-12 | 0        |
| 8Mar2011- | 9126  | 476.73  | -8.21113 | 2 R.SSHEISHF chr5@1494  | 1.98E-10 | 0.007654 |
| 8Mar2011- | 16742 | 895.78  | -1.06827 | 3 _RELTEEDI Splice@chr  | 8.84E-12 | 5.54E-04 |
| 8Mar2011- | 9837  | 509.3   | -20.473  | 2 R.SSVIMLIV chr2@5767  | 1.48E-10 | 0.00613  |
| 8Mar2011- | 13376 | 1030.52 | 12.84278 | 2 L.SPIPEVPC Splice@chr | 4.11E-16 | 0        |
| 8Mar2011- | 1946  | 585.79  | -24.4226 | 2 K.QDPISAT Splice@chr  | 2.75E-10 | 0.008965 |
| 8Mar2011- | 15670 | 899.97  | 3.975293 | 2 R.SK+14.01 chrX@1700  | 4.79E-11 | 0.002492 |
| 8Mar2011- | 4453  | 402.21  | -23.4276 | 2 _MRGGGC chr2@1490     | 3.89E-12 | 0        |
| 8Mar2011- | 13983 | 965.77  | 16.46969 | 4 R.KTSSCQK chr5@2085   | 2.30E-10 | 0.004315 |
| 8Mar2011- | 3115  | 1198.15 | 6.147088 | 2 _KIIEFYSKI chr5@1786  | 2.49E-11 | 5.76E-04 |
| 8Mar2011- | 16392 | 697.13  | -5.59074 | 4 G.TFPRAKD Splice@chr  | 9.15E-11 | 0.002029 |
| 8Mar2011- | 12705 | 1030.52 | 12.84278 | 2 L.SPIPEVPC Splice@chr | 1.14E-17 | 0        |
| 8Mar2011- | 17374 | 634.84  | 6.410455 | 2 R.VDIGDILF Splice@chr | 1.17E-10 | 0.002787 |
| 8Mar2011- | 1952  | 665.38  | -3.2154  | 2 R.QLQM+1 chr5@7160    | 2.97E-10 | 0.006499 |
| 8Mar2011- | 5477  | 741.39  | -17.2291 | 2 K.QKSNWH chr5@1229    | 6.78E-11 | 0.001493 |
| 8Mar2011- | 11583 | 657.38  | -23.6186 | 2 K.LNVDWLI Splice@chr  | 4.32E-10 | 0.009153 |
| 8Mar2011- | 10119 | 1162.23 | 14.80982 | 3 _HTGPGVI Splice@chr   | 1.27E-13 | 0        |
| 8Mar2011- | 19189 | 1175.13 | 14.90082 | 2 K.INWAVTI chr4@2890   | 1.83E-18 | 0        |
| 8Mar2011- | 1721  | 585.79  | -24.4226 | 2 K.QDPISAT Splice@chr  | 2.92E-10 | 0.006379 |
| 8Mar2011- | 14889 | 669.36  | -13.2955 | 2 K.LEFNISKI chr1@1931  | 8.51E-11 | 0.001493 |
| 8Mar2011- | 3068  | 915.47  | 1.201399 | 1 K.FHEIGGQ chrX@4727   | 3.20E-11 | 5.76E-04 |
| 8Mar2011- | 12763 | 1030.51 | 3.115089 | 2 L.SPIPEVPC Splice@chr | 1.96E-18 | 0        |
| 8Mar2011- | 6720  | 434.24  | 13.9946  | 3 _RSNDQTI chr5@6378    | 1.86E-10 | 0.0036   |
| 8Mar2011- | 5559  | 435.25  | -4.00582 | 2 K.KISAHGTI chr4@1727  | 1.89E-10 | 0.0036   |
| 8Mar2011- | 18689 | 860.69  | 14.08015 | 4 R.FQSAAG Splice@chr   | 2.58E-14 | 0        |
| 8Mar2011- | 15876 | 940.45  | -9.06687 | 2 L.K+14.016 chr3@1105  | 4.30E-10 | 0.009153 |
| 8Mar2011- | 12036 | 1156.89 | 7.624255 | 3 _HTGPGVI Splice@chr   | 5.98E-13 | 0        |
| 8Mar2011- | 3015  | 915.47  | 1.201399 | 1 K.FHEIGGQ chrX@4727   | 3.20E-11 | 5.76E-04 |
| 8Mar2011- | 5770  | 626.3   | -9.76097 | 2 R.LCESGAA Splice@chr  | 6.50E-16 | 0        |
| 8Mar2011- | 5971  | 443.24  | -2.94433 | 3 _TASPEAG chr2@1419    | 2.80E-10 | 0.006022 |
| 8Mar2011- | 894   | 470.24  | -26.7946 | 2 _YTAMVLI Splice@chr   | 4.13E-11 | 8.49E-04 |

|           |       |         |          |                         |          |          |
|-----------|-------|---------|----------|-------------------------|----------|----------|
| 8Mar2011- | 5527  | 741.39  | -17.2291 | 2 K.QKSNWH chr5@1229    | 3.86E-11 | 7.14E-04 |
| 8Mar2011- | 7970  | 435.25  | -4.00582 | 2 K.KISAHGTI chr4@1727  | 7.23E-11 | 0.001493 |
| 8Mar2011- | 5185  | 741.39  | -17.2291 | 2 K.QKSNWH chr5@1229    | 1.41E-11 | 3.00E-04 |
| 8Mar2011- | 656   | 474.27  | -11.3587 | 2 K.EAVQLKN chr1@4867   | 7.55E-11 | 0.001493 |
| 8Mar2011- | 5580  | 741.39  | -17.2291 | 2 K.QKSNWH chr5@1229    | 2.83E-11 | 5.76E-04 |
| 8Mar2011- | 15302 | 1187.58 | 10.28775 | 3 R.NGAPPSC Splice@chr  | 4.55E-10 | 0.009816 |
| 8Mar2011- | 5854  | 748.4   | -14.2094 | 2 K.QKSNWH chr5@1229    | 5.29E-11 | 0.001262 |
| 8Mar2011- | 11078 | 671.37  | -24.0361 | 2 T.FNIVHTQ Splice@chr  | 3.78E-10 | 0.008123 |
| 8Mar2011- | 5239  | 741.39  | -17.2291 | 2 K.QKSNWH chr5@1229    | 7.37E-11 | 0.001493 |
| 8Mar2011- | 1391  | 422.27  | 2.173301 | 2 K.IGKGEVLI chrX@1204  | 2.03E-10 | 0.003955 |
| 8Mar2011- | 11412 | 881.92  | -2.80647 | 2 F.LQEQQTY Splice@chr  | 2.12E-12 | 0        |
| 8Mar2011- | 16210 | 987.51  | 4.289691 | 3 K.KYLFLDNI chr4@1288  | 1.79E-10 | 0.003483 |
| 8Mar2011- | 16738 | 895.78  | -1.06827 | 3 _RELTEEDI Splice@chr  | 2.67E-11 | 5.76E-04 |
| 8Mar2011- | 157   | 421.22  | 22.03448 | 2 V.YGVDTTC chr3@1272   | 2.62E-10 | 0.005539 |
| 8Mar2011- | 10388 | 601.32  | -15.224  | 3 K.QFLTFLT/ chr4@7690  | 3.50E-10 | 0.007803 |
| 8Mar2011- | 5717  | 626.3   | -9.76097 | 2 R.LCESGAA Splice@chr  | 4.28E-16 | 0        |
| 8Mar2011- | 16063 | 665.37  | -26.6417 | 2 Q.INNK+14 Splice@chr  | 2.62E-10 | 0.005539 |
| 8Mar2011- | 6520  | 439.91  | -1.85417 | 3 K.VAGSGSL chr5@1747   | 3.83E-10 | 0.008238 |
| 8Mar2011- | 2866  | 915.47  | 1.201399 | 1 K.FHEIGGQ chrX@4727   | 3.33E-11 | 5.76E-04 |
| 8Mar2011- | 19179 | 783.75  | 7.307848 | 3 K.INWAVTI chr4@2890   | 1.57E-11 | 3.00E-04 |
| 8Mar2011- | 15236 | 899.97  | 3.975293 | 2 R.SK+14.01 chrX@1700  | 3.74E-10 | 0.008007 |
| 8Mar2011- | 9740  | 663.85  | -5.06443 | 2 N.KMIFSMI chr4@8622   | 1.35E-10 | 0.003022 |
| 8Mar2011- | 14854 | 849.48  | 10.61812 | 2 R.LLELAPTC chr2@6685  | 4.52E-20 | 0        |
| 8Mar2011- | 5139  | 741.39  | -17.2291 | 2 K.QKSNWH chr5@1229    | 8.95E-11 | 0.001761 |
| 8Mar2011- | 13625 | 563.87  | -6.34728 | 2 R.QNK+14. Splice@chr  | 4.40E-10 | 0.009504 |
| 8Mar2011- | 7015  | 534.32  | 13.11853 | 2 K.TNIYTILTI chr5@1329 | 4.66E-10 | 0.009816 |
| 8Mar2011- | 18951 | 770.77  | -11.1838 | 3 K.YLDAKCK chr4@3751   | 6.05E-11 | 0.001388 |
| 8Mar2011- | 5575  | 936.48  | 27.86052 | 1 K.LNGGYEC chr2@1191   | 3.32E-10 | 0.007327 |
| 8Mar2011- | 13122 | 780.03  | -24.5321 | 3 ?.AQDNYM Splice@chr   | 1.55E-10 | 0.003123 |
| 8Mar2011- | 6328  | 640.81  | -21.5267 | 2 K.FETFFVSF chr1@6740  | 1.31E-10 | 0.003022 |
| 8Mar2011- | 12099 | 1156.89 | 7.624255 | 3 _HTGPGVI Splice@chr   | 5.71E-13 | 0        |
| 8Mar2011- | 13591 | 1153.23 | -17.5731 | 3 F.EGIRTGG Splice@chr  | 2.91E-13 | 0        |
| 8Mar2011- | 7069  | 534.32  | 13.11853 | 2 K.TNIYTILTI chr5@1329 | 1.59E-10 | 0.003123 |
| 8Mar2011- | 14006 | 768.89  | 24.72046 | 2 K.DRQHASI chr3@5403   | 4.49E-10 | 0.009738 |
| 8Mar2011- | 9021  | 1137.65 | -15.1425 | 1 Q.FLVISFA\ chrX@1232  | 3.23E-10 | 0.007087 |
| 8Mar2011- | 6915  | 895.51  | -6.04083 | 2 _SGISIEVN Splice@chr  | 2.89E-10 | 0.006379 |
| 8Mar2011- | 16412 | 987.84  | -0.22613 | 3 K.KYLFLDNI chr4@1288  | 3.92E-10 | 0.008356 |
| 8Mar2011- | 10571 | 676.33  | -7.36975 | 2 K.REM+15. chrX@1536   | 2.82E-10 | 0.006022 |
| 8Mar2011- | 11642 | 1156.56 | 11.5499  | 3 _HTGPGVI Splice@chr   | 2.75E-11 | 5.76E-04 |
| 8Mar2011- | 11464 | 881.92  | -2.80647 | 2 F.LQEQQTY Splice@chr  | 1.39E-11 | 3.00E-04 |
| 8Mar2011- | 16696 | 895.78  | -1.06827 | 3 _RELTEEDI Splice@chr  | 4.96E-12 | 0        |
| 8Mar2011- | 16044 | 985.55  | 25.29396 | 2 R.FADLSEIS chr1@1496  | 2.88E-10 | 0.006265 |
| 8Mar2011- | 9763  | 897.42  | -27.6753 | 3 _QVREMH Splice@chr    | 3.34E-10 | 0.007447 |
| 8Mar2011- | 19892 | 795.65  | -23.4135 | 4 K.SGTIFDNI Splice@chr | 1.71E-14 | 0        |
| 8Mar2011- | 19893 | 1060.54 | -6.74128 | 3 K.SGTIFDNI Splice@chr | 1.02E-12 | 0        |
| 8Mar2011- | 2311  | 801.46  | -26.9469 | 1 K.WAGVVL chr4@3669    | 1.67E-10 | 0.004891 |
| 8Mar2011- | 18756 | 934.98  | 15.13805 | 2 R.QFRQSGI chr5@4795   | 2.68E-10 | 0.006983 |

|           |       |         |          |                         |          |          |
|-----------|-------|---------|----------|-------------------------|----------|----------|
| 8Mar2011- | 18308 | 1007.86 | 15.19559 | 3 R.CWNRRA Splice@chr   | 4.10E-13 | 0        |
| 8Mar2011- | 19771 | 1094.62 | 23.8157  | 2 R.FWKFLAI chr1@139    | 1.97E-10 | 0.005436 |
| 8Mar2011- | 20472 | 783.75  | 7.307848 | 3 K.INWAVTI chr4@289    | 3.81E-13 | 0        |
| 8Mar2011- | 20471 | 1175.12 | 6.371728 | 2 K.INWAVTI chr4@289    | 5.87E-21 | 0        |
| 8Mar2011- | 6290  | 741.39  | -17.2291 | 2 K.QKSNWH chr5@122     | 5.34E-11 | 0.001466 |
| 8Mar2011- | 1978  | 748.36  | 16.41564 | 1 R.ATAGDGI chr3@584    | 5.30E-11 | 0.001466 |
| 8Mar2011- | 1157  | 530.28  | -2.30638 | 2 K.KNALGSE chrX@252    | 1.24E-10 | 0.003753 |
| 8Mar2011- | 18933 | 634.84  | 6.410455 | 2 R.VDIGDILF Splice@chr | 8.06E-12 | 1.52E-04 |
| 8Mar2011- | 12748 | 504.26  | -3.94163 | 2 _DFLANSV Splice@chr   | 1.26E-10 | 0.003753 |
| 8Mar2011- | 19189 | 792.15  | -18.5783 | 4 K.SGTIFDNI Splice@chr | 7.51E-14 | 0        |
| 8Mar2011- | 19255 | 795.65  | -15.5001 | 4 K.SGTIFDNI Splice@chr | 1.37E-16 | 0        |
| 8Mar2011- | 10869 | 821.95  | 26.74636 | 2 _SPTLGGN Splice@chr   | 7.37E-18 | 0        |
| 8Mar2011- | 14022 | 838.94  | -22.1914 | 2 R.QFADLPS chr5@189    | 4.26E-10 | 0.009528 |
| 8Mar2011- | 19499 | 1065.21 | -8.54753 | 3 K.SGTIFDNI Splice@chr | 6.37E-13 | 0        |
| 8Mar2011- | 18901 | 634.84  | 6.410455 | 2 R.VDIGDILF Splice@chr | 1.18E-12 | 1.52E-04 |
| 8Mar2011- | 4034  | 657.89  | 5.534419 | 2 R.QLQMSP chr5@716     | 2.13E-10 | 0.00601  |
| 8Mar2011- | 15871 | 888.47  | 22.8338  | 2 K.DITLEVEA Splice@chr | 2.09E-13 | 0        |
| 8Mar2011- | 7088  | 748.39  | -27.6021 | 2 K.QKSNWH chr5@122     | 1.14E-10 | 0.003526 |
| 8Mar2011- | 10666 | 509.3   | -20.473  | 2 R.SSVIMLIV chr2@576   | 4.54E-11 | 0.001079 |
| 8Mar2011- | 20136 | 1147.25 | 13.44098 | 3 R.FQSAAIG Splice@chr  | 5.86E-16 | 0        |
| 8Mar2011- | 18932 | 805.47  | -13.7324 | 2 K.TPIFIPAP chr5@186   | 3.50E-10 | 0.008005 |
| 8Mar2011- | 1002  | 713.88  | -22.346  | 2 K.MKEKK+1 chr4@782    | 1.47E-10 | 0.004566 |
| 8Mar2011- | 19354 | 1060.54 | -6.74128 | 3 K.SGTIFDNI Splice@chr | 2.68E-14 | 0        |
| 8Mar2011- | 20109 | 860.69  | 14.08015 | 4 R.FQSAAIG Splice@chr  | 1.81E-10 | 0.005213 |
| 8Mar2011- | 4335  | 510.3   | 12.8833  | 2 R.RHVAYVF chr1@147    | 1.28E-10 | 0.003753 |
| 8Mar2011- | 17322 | 909.46  | 26.24797 | 3 K.HFRGVM chrX@280     | 1.31E-12 | 1.52E-04 |
| 8Mar2011- | 16355 | 747.39  | 13.7081  | 2 K.MLRFNEC chr2@835    | 1.42E-10 | 0.004344 |
| 8Mar2011- | 17228 | 1143.88 | 13.05325 | 3 K.NMITGTS Splice@chr  | 1.14E-10 | 0.003526 |
| 8Mar2011- | 7118  | 716.4   | 8.019867 | 1 K.LAANAEK chr5@133    | 2.50E-10 | 0.006897 |
| 8Mar2011- | 19848 | 795.66  | -2.97654 | 4 K.SGTIFDNI Splice@chr | 4.34E-15 | 0        |
| 8Mar2011- | 17917 | 987.51  | 4.289691 | 3 K.KYLFLDNI chr4@128   | 1.59E-10 | 0.004795 |
| 31Mar2011 | 15937 | 948.15  | -17.7695 | 3 K.MQDDQC Splice@chr   | 5.02E-10 | 0.009019 |
| 31Mar2011 | 12755 | 956.58  | 8.122697 | 1 R.RSIVIPDR chr4@974   | 2.13E-10 | 0.00317  |
| 29Nov2011 | 12578 | 743.39  | -23.3218 | 2 R.TYKSLSLV chr1@140   | 5.10E-11 | 0.001104 |
| 29Nov2011 | 292   | 987.52  | 9.03305  | 1 _DVNGQE Splice@chr    | 3.08E-10 | 0.006678 |
| 29Nov2011 | 11119 | 866.94  | -6.41409 | 2 K.ITIKYSCF chr3@793   | 4.24E-10 | 0.009703 |
| 31Mar2011 | 4277  | 700.35  | 3.927395 | 2 K.NMNK+1 Splice@chr   | 3.62E-10 | 0.005651 |
| 29Nov2011 | 16268 | 620.36  | -7.4895  | 2 K.PNILIKHY Splice@chr | 1.90E-10 | 0.004631 |
| 31Mar2011 | 3721  | 593.03  | -12.5491 | 3 K.KLVYKLEI chr4@758   | 3.03E-10 | 0.005378 |
| 29Nov2011 | 4229  | 560.34  | -12.8762 | 3 K.IKFQK+1 chr4@173    | 2.73E-11 | 0.002574 |
| 8Mar2011- | 293   | 437.94  | 5.401384 | 3 K.KVQTRNF chr5@294    | 2.95E-10 | 0.00598  |
| 8Mar2011- | 15299 | 965.47  | 7.061017 | 2 L.FMYDTFF chr5@173    | 1.30E-10 | 0.004213 |
| 31Mar2011 | 10097 | 742.92  | -22.0333 | 4 K.KSQIKNEI chr2@133   | 2.72E-10 | 0.004398 |
| 8Mar2011- | 12527 | 779.41  | -20.9081 | 2 R.SNLMKFS chr3@115    | 9.70E-11 | 0.001828 |
| 31May2011 | 4476  | 750.05  | 0.028129 | 3 K.SMNSQK Splice@chr   | 2.58E-10 | 0.005122 |
| 8Mar2011- | 1923  | 675.84  | -0.94879 | 2 _FSLADQG chr5@590     | 1.47E-10 | 0.003741 |
| 31May2011 | 6597  | 985.5   | -15.4747 | 2 S.HYGLIYKk chr1@492   | 9.99E-11 | 0.00205  |

|           |       |         |          |                         |          |          |
|-----------|-------|---------|----------|-------------------------|----------|----------|
| 31Mar2011 | 3914  | 687.38  | -2.62361 | 2 R.LFHQCAL Splice@chr  | 1.47E-10 | 0.002489 |
| 31Mar2011 | 6403  | 687.38  | -2.62361 | 2 R.LFHQCAL Splice@chr  | 5.86E-10 | 0.009766 |
| 31May2011 | 7331  | 686.88  | -0.17798 | 2 R.LFHQCAL Splice@chr  | 2.39E-10 | 0.005133 |
| 31May2011 | 10685 | 1196.97 | -1.36091 | 3 K.KLAPPLY chr5@1827   | 8.31E-11 | 0.003493 |
| 31Mar2011 | 14736 | 1190.6  | -1.28245 | 3 _RDIEK+14 Splice@chr  | 2.74E-10 | 0.006674 |
| 29Nov2011 | 2768  | 702.35  | -18.9133 | 3 R.EGRAEAE chr3@1364   | 8.12E-11 | 0.003212 |
| 29Nov2011 | 861   | 441.23  | 9.760588 | 3 K.DDK+14.1 Splice@chr | 2.84E-10 | 0.008184 |
| 31May2011 | 5425  | 493.31  | 29.25991 | 2 R.IFLTHLNK chr5@1984  | 4.89E-10 | 0.009291 |
| 29Nov2011 | 8642  | 772.4   | -9.99923 | 3 R.QPFDNFF chr1@1155   | 1.53E-10 | 0.00625  |
| 29Nov2011 | 17088 | 859.46  | 0.819369 | 2 C.WSNIVSL Splice@chr  | 2.31E-10 | 0.008078 |
| 8Mar2011- | 4983  | 583.95  | -9.11298 | 3 _NFAKYLS chr1@2560    | 3.51E-10 | 0.006814 |
| 31Mar2011 | 7319  | 625.32  | -20.1389 | 2 R.DEIVTRN chr2@1031   | 7.03E-10 | 0.009982 |
| 31May2011 | 6610  | 839.08  | 4.396586 | 3 R.FYHRWS chr2@2044    | 1.24E-10 | 0.004908 |
| 8Mar2011- | 861   | 587.06  | 6.873702 | 4 _NPLCGAN chr1@1430    | 1.97E-10 | 0.003463 |
| 31Mar2011 | 8069  | 862.46  | 16.22525 | 2 R.M+15.99 Splice@chr  | 1.31E-10 | 0.002888 |
| 31Mar2011 | 6432  | 862.45  | 4.60542  | 2 R.M+15.99 Splice@chr  | 2.12E-10 | 0.003143 |
| 31Mar2011 | 6169  | 862.45  | 4.60542  | 2 R.M+15.99 Splice@chr  | 5.07E-10 | 0.006605 |
| 31Mar2011 | 7606  | 862.45  | 4.60542  | 2 R.M+15.99 Splice@chr  | 6.11E-10 | 0.009634 |
| 29Nov2011 | 22407 | 1124.6  | -24.7529 | 2 H.WSFWNI Splice@chr   | 1.62E-10 | 0.003869 |
| 8Mar2011- | 6767  | 468.25  | -7.48931 | 3 K.K+14.016 chr5@1107  | 2.72E-10 | 0.005747 |
| 31May2011 | 8408  | 908.41  | -28.5862 | 2 R.RM+15.9 chr2@1391   | 1.15E-10 | 0.004624 |
| 31May2011 | 8442  | 908.41  | -28.5862 | 2 R.RM+15.9 chr2@1391   | 2.86E-10 | 0.007477 |
| 31May2011 | 7537  | 908.41  | -28.5862 | 2 R.RM+15.9 chr2@1391   | 5.31E-10 | 0.009688 |
| 31Mar2011 | 14448 | 1109.56 | -26.0803 | 2 K.NEEKYTIC chr2@1095  | 4.54E-10 | 0.008118 |
| 8Mar2011- | 19817 | 986.59  | 27.00135 | 2 _SARRRSS chr1@5334    | 9.21E-11 | 0.002157 |
| 31Mar2011 | 12657 | 825.75  | -2.04743 | 3 K.NFINSTTI Splice@chr | 3.30E-10 | 0.0068   |
| 29Nov2011 | 1418  | 487.24  | 7.615349 | 3 K.FEK+14.0 chr2@3355  | 3.04E-10 | 0.007606 |
| 29Nov2011 | 1130  | 487.24  | 7.615349 | 3 K.FEK+14.0 chr2@3355  | 2.91E-10 | 0.008478 |
| 31May2011 | 4173  | 1081.1  | 25.35779 | 2 _ASFAPEEI Splice@chr  | 1.04E-14 | 0        |
| 31May2011 | 5504  | 1081.1  | 25.35779 | 2 _ASFAPEEI Splice@chr  | 2.00E-14 | 0        |
| 31May2011 | 5543  | 1081.09 | 16.08574 | 2 _ASFAPEEI Splice@chr  | 1.29E-13 | 0        |
| 31May2011 | 4529  | 1081.1  | 25.35779 | 2 _ASFAPEEI Splice@chr  | 3.53E-14 | 0        |
| 29Nov2011 | 10216 | 854.47  | 0.967276 | 2 K.PFPELAL1 chr2@2652  | 1.61E-11 | 3.39E-04 |
| 29Nov2011 | 2064  | 679.32  | -24.6258 | 2 R.YSM+15.1 chr5@1171  | 2.59E-10 | 0.006678 |
| 31May2011 | 5420  | 612.32  | 24.6618  | 2 Q.HDADAL chrX@1305    | 2.26E-10 | 0.008003 |
| 8Mar2011- | 1927  | 658.39  | 28.38848 | 2 _TRIINK+1 chr5@2156   | 3.23E-10 | 0.007906 |
| 31Mar2011 | 8617  | 927     | -1.2189  | 2 K.YVK+14.0 chr4@8827  | 5.59E-10 | 0.009308 |
| 29Nov2011 | 8540  | 657.04  | 15.23612 | 3 K.LIFWNPk chr2@9775   | 3.11E-10 | 0.008703 |
| 31May2011 | 10586 | 675.38  | 5.882966 | 2 K.DFYHKKR chrX@1518   | 9.90E-11 | 0.004575 |
| 8Mar2011- | 19154 | 1113.61 | 18.03028 | 2 R.YFK+14.0 chr3@1316  | 1.30E-10 | 0.003022 |
| 8Mar2011- | 18033 | 1089.02 | -26.3484 | 2 N.DFSRK+1 chr4@5295   | 1.28E-10 | 0.003102 |
| 8Mar2011- | 17214 | 990.17  | 12.4232  | 3 S.PGGPENY Splice@chr  | 2.97E-16 | 0        |
| 8Mar2011- | 13241 | 990.51  | 18.03905 | 3 S.PGGPENY Splice@chr  | 5.33E-12 | 1.89E-04 |
| 29Nov2011 | 4911  | 762.4   | -16.914  | 2 K.SEGLTES1 chr3@7315  | 2.41E-10 | 0.008444 |
| 29Nov2011 | 6853  | 766.49  | 25.99405 | 2 K.K+14.016 Splice@chr | 4.30E-11 | 0.003744 |
| 29Nov2011 | 9788  | 683.36  | -22.8687 | 2 _KTPNVSC Splice@chr   | 3.55E-10 | 0.009805 |
| 31May2011 | 6252  | 988.07  | 16.81945 | 2 K.ESLQPKG Splice@chr  | 1.51E-10 | 0.003013 |

|           |       |         |          |                          |          |          |
|-----------|-------|---------|----------|--------------------------|----------|----------|
| 31Mar2011 | 2327  | 552.28  | 23.95498 | 4 _ .PKYLPSG chr4@105    | 2.68E-10 | 0.003902 |
| 29Nov2011 | 14175 | 839.45  | -16.4238 | 2 R.CDLK+14 chr4@135     | 3.48E-10 | 0.008444 |
| 29Nov2011 | 16838 | 1043.52 | 18.50095 | 3 K.NENFEPN chr4@368     | 8.98E-11 | 0.002608 |
| 31May2011 | 8174  | 972.94  | -6.84491 | 2 R.RCIRYHS chr1@655     | 2.73E-10 | 0.004269 |
| 31Mar2011 | 9935  | 677.61  | 23.84776 | 4 K.TKTVYQS chrX@868     | 5.87E-10 | 0.007283 |
| 29Nov2011 | 6461  | 1151.06 | -20.2543 | 2 R.VEKAGQI Splice@chr   | 1.71E-10 | 0.005834 |
| 8Mar2011- | 17426 | 1023.04 | -24.7044 | 2 K.KLSSKEA chr2@118     | 6.71E-11 | 0.001049 |
| 31Mar2011 | 6269  | 978.53  | 5.2799   | 2 _ .FKTLKSIM chr5@140   | 4.96E-10 | 0.007524 |
| 31Mar2011 | 10291 | 1042.56 | -3.34136 | 1 R.RHRCRTR chr3@128     | 2.09E-10 | 0.003669 |
| 29Nov2011 | 13479 | 1007.52 | -28.3616 | 2 K.LGHPKM chr1@106      | 2.29E-10 | 0.006398 |
| 31Mar2011 | 8972  | 728.73  | 11.44085 | 3 R.NALPDH Splice@chr    | 6.78E-11 | 8.54E-04 |
| 31Mar2011 | 9532  | 728.73  | 11.44085 | 3 R.NALPDH Splice@chr    | 2.27E-11 | 1.67E-04 |
| 31Mar2011 | 9582  | 728.73  | 11.44085 | 3 R.NALPDH Splice@chr    | 6.12E-12 | 0        |
| 31Mar2011 | 9305  | 728.73  | 11.44085 | 3 R.NALPDH Splice@chr    | 3.68E-11 | 0.001054 |
| 31Mar2011 | 2806  | 434.72  | 14.21366 | 2 R.MSISTSS chr3@281     | 3.98E-10 | 0.01     |
| 8Mar2011- | 11407 | 788.46  | 25.48017 | 2 R.TTALKDIL Splice@chr  | 3.25E-10 | 0.007678 |
| 31May2011 | 7390  | 1088.54 | -22.4298 | 2 K.RREGEPN chr4@167     | 3.20E-10 | 0.009539 |
| 31May2011 | 9695  | 1088.54 | -22.4298 | 2 K.RREGEPN chr4@167     | 2.37E-10 | 0.004196 |
| 8Mar2011- | 20022 | 1116.09 | -29.5415 | 2 K.EKEEQK+ chr2@809     | 5.11E-10 | 0.009985 |
| 8Mar2011- | 19803 | 1018.51 | -16.0896 | 1 R.RGSLEYH chr3@469     | 3.08E-10 | 0.006546 |
| 29Nov2011 | 10834 | 903.47  | -19.4534 | 2 R.KYQVNS chr4@401      | 2.15E-10 | 0.008681 |
| 31Mar2011 | 6146  | 834.47  | 29.51291 | 2 K.PREDSPS Splice@chr   | 6.09E-10 | 0.009385 |
| 31Mar2011 | 869   | 461.91  | -16.1216 | 3 R.GFHLHDF Splice@chr   | 2.40E-10 | 0.005251 |
| 31Mar2011 | 825   | 461.91  | -16.1216 | 3 R.GFHLHDF Splice@chr   | 1.20E-10 | 0.00167  |
| 31Mar2011 | 2384  | 494.28  | 0.742412 | 2 _ .PEFPELKr Splice@chr | 4.09E-10 | 0.006497 |
| 31Mar2011 | 5113  | 605.85  | -29.0615 | 2 K.QLHSQK chrX@151      | 1.96E-10 | 0.004727 |
| 31Mar2011 | 2883  | 438.26  | -26.5908 | 2 W.LGVAPP chr3@187      | 2.33E-10 | 0.002794 |
| 31Mar2011 | 4951  | 1045.01 | -3.94708 | 2 K.KNVFFFD chr2@134     | 2.42E-11 | 4.34E-04 |
| 8Mar2011- | 17926 | 1010.52 | 4.655446 | 2 I.SM+15.99 chr4@622    | 1.25E-10 | 0.004149 |
| 31May2011 | 5495  | 552.64  | -22.276  | 3 K.NVYILFQI chrX@127    | 2.77E-10 | 0.008578 |
| 8Mar2011- | 2863  | 579.31  | 7.449082 | 2 _ .YLQHPIE Splice@chr  | 2.88E-10 | 0.005871 |
| 8Mar2011- | 19873 | 870.83  | 24.82767 | 3 R.LLNQKV chr4@353      | 1.27E-11 | 0        |
| 8Mar2011- | 11782 | 765.9   | -6.78259 | 4 R.SK+14.01 chr4@100    | 4.39E-10 | 0.008808 |
| 29Nov2011 | 14782 | 959.5   | 0.224111 | 2 _ .QWKVKV Splice@chr   | 5.11E-11 | 0.001361 |
| 29Nov2011 | 14292 | 959.5   | 0.224111 | 2 _ .QWKVKV Splice@chr   | 2.47E-10 | 0.006218 |
| 29Nov2011 | 12362 | 959.5   | 0.224111 | 2 _ .QWKVKV Splice@chr   | 1.48E-10 | 0.004975 |
| 29Nov2011 | 12308 | 959.5   | 0.224111 | 2 _ .QWKVKV Splice@chr   | 1.01E-10 | 0.003532 |
| 29Nov2011 | 11833 | 959.5   | 0.224111 | 2 _ .QWKVKV Splice@chr   | 3.01E-10 | 0.00657  |
| 29Nov2011 | 11880 | 959.5   | 0.224111 | 2 _ .QWKVKV Splice@chr   | 1.87E-10 | 0.004031 |
| 31Mar2011 | 11715 | 784.41  | -4.32541 | 2 R.GRWLK+ Splice@chr    | 4.92E-10 | 0.004622 |
| 29Nov2011 | 20692 | 832.45  | 7.897562 | 2 R.GK+14.0 chr2@103     | 1.38E-10 | 0.003962 |
| 8Mar2011- | 14726 | 682.85  | 18.26141 | 2 _ .MNFEDV chr5@114     | 2.72E-10 | 0.008683 |
| 31Mar2011 | 10042 | 726.13  | -28.8584 | 4 K.KIK+14.0 chr3@115    | 1.12E-10 | 0.001228 |
| 8Mar2011- | 12451 | 749.42  | -0.28419 | 2 K.M+15.99 Splice@chr   | 1.25E-10 | 0.002965 |
| 29Nov2011 | 9947  | 576.31  | -15.3201 | 3 R.NAKRSS Splice@chr    | 3.91E-11 | 0.001943 |
| 31Mar2011 | 9383  | 865.44  | -20.451  | 2 R.MDPCQIF Splice@chr   | 8.33E-10 | 0.008272 |
| 8Mar2011- | 18383 | 1045.08 | -27.1069 | 2 R.RIM+15.5 Splice@chr  | 7.10E-11 | 0.001715 |

|           |       |         |          |                         |          |          |
|-----------|-------|---------|----------|-------------------------|----------|----------|
| 8Mar2011- | 20213 | 983.54  | 2.981782 | 4 _ .RDTQRA\ chr2@2035  | 2.93E-10 | 0.007034 |
| 29Nov2011 | 9226  | 738.38  | -27.9216 | 3 _ .NGCNIFA chrX@6426  | 2.27E-10 | 0.008359 |
| 31May2011 | 6280  | 854.14  | -25.9309 | 3 K.KKEK+14. chr2@1522  | 3.48E-10 | 0.009539 |
| 31Mar2011 | 14448 | 986.58  | -11.4662 | 1 R.DARRRRF chr4@7390   | 1.21E-10 | 0.00258  |
| 29Nov2011 | 16784 | 1032.88 | 10.74986 | 3 Q.CNLKFRT chr5@1373   | 1.53E-10 | 0.005875 |
| 31Mar2011 | 11102 | 1175.52 | -21.4097 | 2 K.STFKSFM chr3@4781   | 3.70E-10 | 0.004051 |
| 29Nov2011 | 15965 | 804.95  | -10.0642 | 2 Y.FLTVVSAl chrX@8941  | 3.06E-10 | 0.008583 |
| 8Mar2011- | 21204 | 1032.2  | -29.4249 | 3 R.RAFGKEN Splice@chr  | 7.64E-11 | 0.001647 |
| 31May2011 | 7313  | 976.02  | 0.813793 | 2 R.FFPNK+1 chr3@1413   | 4.57E-10 | 0.009588 |
| 31Mar2011 | 6545  | 747.44  | -4.70343 | 2 K.QRKK+14 chr4@4884   | 1.37E-10 | 0.002323 |
| 8Mar2011- | 7973  | 520.81  | -22.5441 | 2 R.VVLEGIP\ Splice@chr | 3.38E-10 | 0.008001 |
| 29Nov2011 | 13746 | 1141.3  | -6.19231 | 3 K.TKQK+14 chr2@1473   | 1.15E-10 | 0.002941 |
| 8Mar2011- | 18054 | 839.94  | -27.9156 | 2 K.NKWMNI Splice@chr   | 1.74E-10 | 0.003702 |
| 31Mar2011 | 9991  | 890.48  | 14.52264 | 2 K.KYYFEQT: chrX@2737  | 2.05E-10 | 0.005168 |
| 31Mar2011 | 8113  | 686.88  | 11.03477 | 2 K.NGVQNL: Splice@chr  | 1.37E-11 | 0        |
| 29Nov2011 | 5308  | 796.93  | 2.802118 | 2 R.KENEVNI chrX@1702   | 2.54E-10 | 0.006455 |
| 29Nov2011 | 19547 | 1133.6  | -28.3452 | 2 R.HANSK+1 chr4@1608   | 4.04E-10 | 0.009361 |
| 8Mar2011- | 2369  | 417.25  | 6.060899 | 3 K.AYNLSGL chr1@5934   | 2.43E-10 | 0.006379 |
| 8Mar2011- | 3420  | 579.76  | -8.54218 | 2 K.SINQYYF: chr5@8221  | 4.41E-10 | 0.009957 |
| 29Nov2011 | 20965 | 648.33  | -20.3494 | 4 K.LTQGSNF chrX@1195   | 3.22E-10 | 0.007399 |
| 29Nov2011 | 15717 | 1063.56 | -23.9918 | 2 _ .SFEK+14. chr4@1521 | 1.89E-10 | 0.00559  |
| 31Mar2011 | 5080  | 512     | 7.246347 | 3 K.TTPLVPK: chrX@1573  | 4.48E-10 | 0.007758 |
| 29Nov2011 | 9674  | 533.31  | 7.863878 | 2 K.LLYTWRC chr1@1325   | 5.90E-11 | 0.001838 |
| 31May2011 | 784   | 568.81  | 16.40945 | 2 K.NRLALMI Splice@chr  | 7.22E-10 | 0.008997 |
| 8Mar2011- | 17611 | 1196.97 | -23.5323 | 3 K.NVGESKk Splice@chr  | 2.43E-10 | 0.004929 |
| 31May2011 | 7010  | 894.45  | 16.4255  | 3 _ .VRQHCS: Splice@chr | 1.52E-10 | 0.003873 |
| 29Nov2011 | 6257  | 606.32  | -11.2931 | 2 R.EK+14.01 chr4@1266  | 3.05E-10 | 0.008169 |
| 8Mar2011- | 13659 | 872.96  | -11.4499 | 2 R.RLSKM+1 Splice@chr  | 3.85E-10 | 0.007954 |
| 31May2011 | 5427  | 517.96  | -25.8167 | 3 K.IDFK+14. chr1@1265  | 2.96E-10 | 0.008056 |
| 31Mar2011 | 3191  | 561.28  | 5.120131 | 4 K.RGEDADI Splice@chr  | 3.89E-16 | 0        |
| 31Mar2011 | 4603  | 1119.53 | 1.884393 | 2 R.CAAQTA: chr4@1276   | 2.00E-10 | 0.00603  |
| 31Mar2011 | 4650  | 1119.53 | 1.884393 | 2 R.CAAQTA: chr4@1276   | 4.17E-10 | 0.008905 |
| 31Mar2011 | 4602  | 1119.53 | 1.884393 | 2 R.CAAQTA: chr4@1276   | 3.83E-10 | 0.008691 |
| 31Mar2011 | 6420  | 746.69  | 2.867053 | 3 R.CAAQTA: chr4@1276   | 4.45E-10 | 0.008207 |
| 31Mar2011 | 4873  | 1119.53 | 1.884393 | 2 R.CAAQTA: chr4@1276   | 2.03E-10 | 0.002923 |
| 31Mar2011 | 6033  | 1119.53 | 1.884393 | 2 R.CAAQTA: chr4@1276   | 2.70E-10 | 0.003509 |
| 31Mar2011 | 5984  | 1119.53 | 1.884393 | 2 R.CAAQTA: chr4@1276   | 5.57E-10 | 0.009392 |
| 31Mar2011 | 6016  | 746.69  | 2.867053 | 3 R.CAAQTA: chr4@1276   | 4.83E-10 | 0.006975 |
| 29Nov2011 | 11005 | 804.93  | -21.1058 | 2 K.ADGIYQK chr2@2278   | 6.13E-11 | 0.002758 |
| 29Nov2011 | 9437  | 612.97  | -14.934  | 3 R.GK+14.01 chr5@1894  | 1.47E-10 | 0.005608 |
| 31Mar2011 | 8842  | 775.89  | -2.87547 | 2 R.FCKK+14. chr1@2393  | 2.85E-10 | 0.007876 |
| 8Mar2011- | 15818 | 994.51  | 0.163825 | 3 R.CLWSAS: Splice@chr  | 3.17E-10 | 0.006345 |
| 8Mar2011- | 8519  | 1108.48 | 7.559206 | 1 K.SEHWNC chr3@2820    | 1.73E-10 | 0.004682 |
| 8Mar2011- | 8497  | 1108.48 | 7.559206 | 1 K.SEHWNC chr3@2820    | 3.24E-10 | 0.009011 |
| 8Mar2011- | 7921  | 1108.48 | 7.559206 | 1 K.SEHWNC chr3@2820    | 3.58E-10 | 0.007414 |
| 31Mar2011 | 7099  | 886.01  | -25.3789 | 2 K.KK+14.01 chr5@1105  | 1.90E-10 | 0.006019 |
| 31Mar2011 | 6497  | 527.76  | -13.5096 | 2 K.FGRQGFC chrX@7480   | 6.81E-10 | 0.008062 |

|           |       |         |          |                         |          |          |
|-----------|-------|---------|----------|-------------------------|----------|----------|
| 31May2011 | 3446  | 603.31  | -14.1598 | 3 K.IEMRAGC chr1@1074   | 7.91E-11 | 0.001304 |
| 31May2011 | 3480  | 603.31  | -14.1598 | 3 K.IEMRAGC chr1@1074   | 1.99E-10 | 0.007403 |
| 31May2011 | 1337  | 603.32  | 2.468377 | 3 K.IEMRAGC chr1@1074   | 8.26E-12 | 0        |
| 8Mar2011  | 9390  | 619.37  | -7.995   | 2 K.KLGK+14 chr5@2071   | 2.77E-10 | 0.005759 |
| 31May2011 | 6514  | 646.11  | 1.324586 | 4 R.RSLETQQ Splice@chr  | 3.74E-10 | 0.007933 |
| 31May2011 | 6344  | 685.7   | -26.5043 | 3 R.LLSIRYGS Splice@chr | 5.76E-11 | 0        |
| 31May2011 | 3120  | 685.7   | -26.5043 | 3 R.LLSIRYGS Splice@chr | 1.09E-10 | 0        |
| 31May2011 | 5925  | 685.7   | -26.5043 | 3 R.LLSIRYGS Splice@chr | 4.83E-11 | 6.95E-04 |
| 31May2011 | 5596  | 685.7   | -26.5043 | 3 R.LLSIRYGS Splice@chr | 2.84E-10 | 0.009339 |
| 29Nov2011 | 3049  | 547.81  | -5.58107 | 2 K.LQRGEK+ Splice@chr  | 1.33E-10 | 0.004533 |
| 31May2011 | 9543  | 1074.03 | -13.1963 | 2 R.LEVTLKRI Splice@chr | 2.97E-10 | 0.007739 |
| 31Mar2011 | 6627  | 886.01  | -19.4924 | 2 K.RK+14.01 Splice@chr | 3.74E-10 | 0.004993 |
| 31Mar2011 | 4618  | 869.47  | -2.3895  | 2 _FFQKINAI chr2@1146   | 3.75E-10 | 0.006343 |
| 31Mar2011 | 11190 | 765.39  | -28.962  | 2 K.ICMFLAK chr3@1198   | 9.08E-11 | 0.001245 |
| 8Mar2011  | 18488 | 930.86  | 8.489465 | 3 R.LCKLPK+1 chr1@1234  | 3.46E-10 | 0.008309 |
| 8Mar2011  | 16197 | 931.2   | 14.37597 | 3 R.LCK+14.0 chr1@1234  | 2.52E-11 | 8.89E-04 |
| 31Mar2011 | 2080  | 551.79  | -19.6139 | 2 K.KFEFLYQI chr5@3745  | 4.44E-10 | 0.006164 |
| 31Mar2011 | 2432  | 565.81  | 27.88146 | 2 R.QGQESQ Splice@chr   | 6.03E-10 | 0.009986 |
| 29Nov2011 | 13783 | 1034.53 | -6.85039 | 2 _QFLQSK+ Splice@chr   | 3.65E-10 | 0.007526 |
| 29Nov2011 | 12719 | 635.86  | -18.2311 | 2 R.SRDFGK+ Splice@chr  | 1.15E-10 | 0.002677 |
| 29Nov2011 | 14842 | 774.38  | -20.3473 | 4 R.EIK+14.0 Splice@chr | 2.38E-10 | 0.005758 |
| 31Mar2011 | 9124  | 647.37  | 6.326765 | 2 _IYCIHILTF chr4@8325  | 1.94E-10 | 0.001953 |
| 31May2011 | 4515  | 560.79  | 7.414351 | 2 K.EDIFAEQI Splice@chr | 1.89E-10 | 0.005169 |
| 31May2011 | 1957  | 560.79  | 7.414351 | 2 K.EDIFAEQI Splice@chr | 1.00E-10 | 0.001342 |
| 31May2011 | 1977  | 560.79  | 7.414351 | 2 K.EDIFAEQI Splice@chr | 8.33E-11 | 0.001342 |
| 31May2011 | 4260  | 560.79  | 7.414351 | 2 K.EDIFAEQI Splice@chr | 9.49E-11 | 0.003032 |
| 31May2011 | 4158  | 561.29  | 4.417817 | 2 K.EDIFAEQI Splice@chr | 1.95E-10 | 0.008675 |
| 31May2011 | 3503  | 561.29  | 4.417817 | 2 K.EDIFAEQI Splice@chr | 2.35E-10 | 0.005924 |
| 29Nov2011 | 9824  | 600.38  | 13.23831 | 2 K.EASILTLA Splice@chr | 1.48E-11 | 3.39E-04 |
| 29Nov2011 | 9876  | 600.38  | 13.23831 | 2 K.EASILTLA Splice@chr | 9.02E-11 | 0.002159 |
| 29Nov2011 | 10375 | 600.38  | 13.23831 | 2 K.EASILTLA Splice@chr | 2.29E-10 | 0.005279 |
| 29Nov2011 | 10427 | 600.38  | 13.23831 | 2 K.EASILTLA Splice@chr | 7.40E-11 | 0.002197 |
| 29Nov2011 | 3872  | 807.43  | 9.915011 | 2 R.NLEYFISN chr4@7575  | 3.56E-10 | 0.009211 |
| 31May2011 | 9683  | 883.98  | -6.81139 | 2 K.VCQGIEK chr2@6575   | 2.43E-10 | 0.008655 |
| 31May2011 | 6776  | 883.48  | -4.91061 | 2 K.VCQGIEK chr2@6575   | 1.33E-10 | 0.003795 |
| 31May2011 | 6120  | 883.48  | -4.91061 | 2 K.VCQGIEK chr2@6575   | 5.95E-11 | 0.002366 |
| 31May2011 | 7900  | 883.98  | -6.81139 | 2 K.VCQGIEK chr2@6575   | 1.98E-10 | 0.005444 |
| 31May2011 | 7532  | 883.98  | -6.81139 | 2 K.VCQGIEK chr2@6575   | 3.84E-11 | 0        |
| 31May2011 | 5762  | 883.98  | -6.81139 | 2 K.VCQGIEK chr2@6575   | 4.97E-11 | 0        |
| 31May2011 | 5741  | 883.98  | -6.81139 | 2 K.VCQGIEK chr2@6575   | 1.36E-10 | 0.00275  |
| 31May2011 | 6330  | 883.48  | -4.91061 | 2 K.VCQGIEK chr2@6575   | 7.23E-11 | 6.95E-04 |
| 31Mar2011 | 13683 | 974.56  | -24.6611 | 1 R.RKATWR chr5@1945    | 2.25E-10 | 0.002319 |
| 8Mar2011  | 13013 | 582.31  | -5.09489 | 2 K.LFYTLTYN chr4@6810  | 2.65E-10 | 0.005499 |
| 29Nov2011 | 11509 | 1138.56 | -20.1549 | 2 K.QITFFQIA chr4@7205  | 3.09E-10 | 0.007677 |
| 29Nov2011 | 12319 | 1138.56 | -20.1549 | 2 K.QITFFQIA chr4@7205  | 2.33E-10 | 0.006362 |
| 31May2011 | 5477  | 918.45  | -15.7002 | 1 K.NDGKKNI chr5@9685   | 6.67E-11 | 0.001491 |
| 29Nov2011 | 24345 | 1184.67 | 9.350481 | 3 K.TSILRNLR chr2@1091  | 1.43E-10 | 0.004085 |

|            |       |         |          |                         |          |          |
|------------|-------|---------|----------|-------------------------|----------|----------|
| 31May2011- | 8544  | 747.34  | -16.553  | 3 _..NIYDM+1 chrX@1256  | 3.15E-10 | 0.006189 |
| 8Mar2011-  | 9862  | 892.97  | 13.68578 | 2 R.TKTKDGF chrX@2048   | 3.29E-10 | 0.00776  |
| 31Mar2011- | 7203  | 1183.61 | -16.9085 | 2 K.QFFSGRA chr2@1141   | 4.86E-11 | 7.22E-04 |
| 8Mar2011-  | 18552 | 953.02  | 13.61205 | 4 K.CRSFPASi chr2@2651  | 5.05E-10 | 0.008822 |
| 8Mar2011-  | 18082 | 568.86  | 18.34449 | 2 K.LNK+14.C chr5@1954  | 3.44E-10 | 0.007894 |
| 29Nov2011  | 13588 | 840.2   | 2.783434 | 4 R.STYLEVQ chr2@1410   | 3.45E-10 | 0.008444 |
| 31Mar2011- | 12397 | 988.52  | -28.4571 | 1 R.SLADNRR chr5@5719   | 4.96E-10 | 0.008825 |
| 31Mar2011- | 12035 | 779.39  | -24.7532 | 2 R.QGDFS\ chrX@9029    | 1.28E-10 | 0.002304 |
| 8Mar2011-  | 15202 | 1041.54 | -28.2554 | 2 E.RDRCARC chrX@7823   | 2.63E-10 | 0.005476 |
| 31Mar2011- | 7528  | 770.42  | 13.53566 | 2 E.M+15.99 chr4@8753   | 2.63E-10 | 0.004634 |
| 31May2011- | 4988  | 850.47  | -27.8776 | 2 _..QNPTK+1 chr2@1272  | 1.27E-10 | 0.003859 |
| 29Nov2011  | 10308 | 707.7   | 29.06384 | 3 S.ILEESLSGi chr5@1388 | 1.76E-10 | 0.003306 |
| 29Nov2011  | 15701 | 732.39  | -27.5975 | 2 R.KFGEKLG chr4@1872   | 1.43E-10 | 0.002769 |
| 8Mar2011-  | 20037 | 1030.09 | -11.7433 | 2 K.MERWK+ chr2@3931    | 2.62E-10 | 0.009906 |
| 31Mar2011- | 10407 | 724.07  | -19.6757 | 3 R.YDRFK+1 chrX@1586   | 4.57E-10 | 0.006072 |
| 8Mar2011-  | 18486 | 1017.53 | -5.97615 | 2 K.NCLQGK+ chr3@1289   | 2.88E-10 | 0.005304 |
| 8Mar2011-  | 16226 | 871.46  | -8.17226 | 2 V.FRNIPPPI chrX@1589  | 3.42E-11 | 5.76E-04 |
| 31Mar2011- | 10771 | 983.54  | -27.2701 | 4 _..IYVVSTFS chrX@1575 | 6.69E-10 | 0.008685 |
| 8Mar2011-  | 10469 | 570.3   | 13.18729 | 2 K.M+15.99 Splice@chr  | 3.61E-10 | 0.007361 |
| 8Mar2011-  | 14533 | 980.56  | -12.0618 | 2 _..NFQK+14 chr5@1722  | 2.61E-10 | 0.005293 |
| 8Mar2011-  | 18240 | 717.72  | 24.45391 | 3 L.FDIM+15 Splice@chr  | 2.32E-10 | 0.006429 |
| 8Mar2011-  | 18283 | 717.72  | 24.45391 | 3 L.FDIM+15 Splice@chr  | 2.83E-10 | 0.007432 |
| 31May2011- | 9015  | 646.11  | -18.148  | 4 _..LAFLRNL chr4@1446  | 4.04E-10 | 0.009735 |
| 29Nov2011  | 16484 | 751.92  | 8.046919 | 2 K.FFK+14.0 chrX@1528  | 2.93E-10 | 0.007508 |
| 31Mar2011- | 10065 | 1013.04 | -11.9762 | 2 R.IEYSRKNi chr2@8487  | 2.95E-10 | 0.004813 |
| 31May2011- | 5902  | 819.42  | 12.50087 | 2 _..IHSQQFLi chr5@1012 | 1.08E-10 | 0.0041   |
| 31May2011- | 4077  | 819.42  | 12.50087 | 2 _..IHSQQFLi chr5@1012 | 2.10E-10 | 0.008074 |
| 31May2011- | 7298  | 1059    | 15.96001 | 2 R.EFDSNLSi chrX@1164  | 2.90E-10 | 0.005083 |
| 31Mar2011- | 1415  | 524.3   | 13.60347 | 2 R.QNGKPAi chr5@4772   | 8.17E-11 | 0.001891 |
| 31Mar2011- | 1637  | 524.3   | 13.60347 | 2 R.QNGKPAi chr5@4772   | 5.53E-10 | 0.008816 |
| 31Mar2011- | 1666  | 524.3   | 13.60347 | 2 R.QNGKPAi chr5@4772   | 2.27E-10 | 0.004734 |
| 29Nov2011  | 7847  | 824.39  | -27.8497 | 2 K.M+15.99 chr3@7797   | 4.15E-10 | 0.009703 |
| 29Nov2011  | 22676 | 784.09  | 23.38321 | 3 R.MPSTITTi chr1@1082  | 1.50E-10 | 0.003368 |
| 8Mar2011-  | 2646  | 553.33  | -26.4877 | 2 K.LEPKPGP chr2@1373   | 2.61E-10 | 0.007215 |
| 29Nov2011  | 21041 | 1182.59 | 4.0576   | 2 R.TFDDVLY Splice@chr  | 5.40E-12 | 1.29E-04 |
| 29Nov2011  | 22894 | 1182.58 | -4.41753 | 2 R.TFDDVLY Splice@chr  | 2.22E-10 | 0.005345 |
| 29Nov2011  | 22922 | 1182.59 | 4.0576   | 2 R.TFDDVLY Splice@chr  | 6.53E-11 | 0.001447 |
| 31Mar2011- | 2270  | 538.29  | -6.24795 | 2 K.PETPILYS chr2@1266  | 3.24E-10 | 0.005428 |
| 31May2011- | 4991  | 916.98  | -9.83268 | 2 _..ARNGVTi Splice@chr | 5.28E-11 | 6.78E-04 |
| 8Mar2011-  | 13013 | 950.47  | 0.25967  | 1 R.DSLMNLi chr1@8987   | 1.94E-10 | 0.003267 |
| 8Mar2011-  | 18055 | 1032.52 | 19.80362 | 2 R.QETQREE chr2@7583   | 6.81E-11 | 0.002229 |
| 8Mar2011-  | 15289 | 1009.86 | 8.954021 | 3 K.YSWRFDi chr1@1238   | 4.19E-10 | 0.007377 |
| 31May2011- | 3239  | 959.54  | -7.07311 | 1 K.SENVVVR chr3@5837   | 4.20E-10 | 0.008813 |
| 31May2011- | 2207  | 959.54  | -7.07311 | 1 K.SENVVVR chr3@5837   | 2.59E-10 | 0.008834 |
| 8Mar2011-  | 4487  | 517.8   | -19.2081 | 2 R.FPITFALP chr3@6237  | 2.01E-10 | 0.00362  |
| 8Mar2011-  | 5967  | 517.8   | -19.2081 | 2 R.FPITFALP chr3@6237  | 1.88E-10 | 0.005405 |
| 8Mar2011-  | 17796 | 680.86  | 13.73609 | 2 _..YFSIAEM chr4@8553  | 2.44E-10 | 0.006047 |

|           |       |         |          |                          |          |          |
|-----------|-------|---------|----------|--------------------------|----------|----------|
| 8Mar2011- | 17760 | 680.86  | 13.73609 | 2 _YFSIAEM chr4@855      | 2.96E-10 | 0.006499 |
| 8Mar2011- | 19066 | 896.5   | 20.76744 | 2 R.MSK+14. chr1@310     | 5.17E-11 | 0.001376 |
| 8Mar2011- | 18683 | 936.22  | 4.912989 | 4 R.EFNDYRF Splice@chr   | 1.45E-10 | 0.003123 |
| 31May201  | 7012  | 712.4   | 9.494933 | 3 R.LNPM+1 chr3@562      | 3.25E-10 | 0.007338 |
| 29Nov2011 | 971   | 827.91  | -15.1022 | 2 R.SKKEEEEI chr3@105    | 2.96E-10 | 0.00772  |
| 8Mar2011- | 1241  | 522.33  | -16.0394 | 2 R.KAAK+14 chrX@390     | 2.42E-10 | 0.003807 |
| 29Nov2011 | 2562  | 810.43  | -8.06836 | 2 _KM+15.9 chr2@646      | 6.65E-11 | 0.003555 |
| 29Nov2011 | 8220  | 551.28  | -5.32404 | 2 R.EVYAYTSI chrX@166    | 2.40E-10 | 0.006517 |
| 29Nov2011 | 6238  | 615.83  | -27.6676 | 2 R.KLGHLNF chr1@118     | 3.52E-10 | 0.00872  |
| 29Nov2011 | 19594 | 801.95  | -1.14306 | 2 R.SRVFVGE chr3@744     | 1.56E-10 | 0.005293 |
| 29Nov2011 | 1307  | 933.49  | -17.165  | 1 R.SSRRSPSI chr3@117    | 1.90E-10 | 0.007036 |
| 31Mar2011 | 13519 | 851.39  | -18.8241 | 1 _REQMMF chrX@123       | 6.64E-10 | 0.007338 |
| 29Nov2011 | 1435  | 729.43  | 8.295368 | 2 K.LK+14.01 chr2@325    | 1.10E-10 | 0.002596 |
| 29Nov2011 | 21723 | 1287.68 | -4.24637 | 2 K.RKKIFWK chr3@122     | 4.23E-10 | 0.009006 |
| 31May201  | 5813  | 654.34  | -17.9193 | 4 K.NRNIFHN chrX@561     | 3.63E-10 | 0.007026 |
| 31Mar2011 | 911   | 559.35  | -5.68435 | 2 R.LLQFGLT chr1@627     | 2.42E-10 | 0.005251 |
| 31Mar2011 | 909   | 549.93  | 2.041051 | 3 R.VDEQMF Splice@chr    | 4.57E-10 | 0.008207 |
| 31Mar2011 | 2063  | 492.59  | -24.0866 | 3 T.K+14.016 chr3@210    | 3.72E-10 | 0.006354 |
| 31Mar2011 | 11463 | 1008.2  | 3.900576 | 3 _NESFK+1 chr2@961      | 1.31E-10 | 0.002888 |
| 31Mar2011 | 8310  | 951.01  | -22.2291 | 2 R.TLCDTFLC Splice@chr  | 5.70E-10 | 0.009489 |
| 31May201  | 2686  | 790.05  | -11.8391 | 3 K.ELNYKIKI chr5@125    | 1.31E-10 | 0.003906 |
| 29Nov2011 | 24047 | 1287.16 | 5.246755 | 2 K.IIKSTIIFC Splice@chr | 1.26E-10 | 0.003615 |
| 29Nov2011 | 1205  | 854.38  | -17.6124 | 1 K.NEHPSNF Splice@chr   | 1.44E-10 | 0.005595 |
| 31May201  | 4113  | 569.81  | 11.05251 | 2 _EVLLDTF chr2@341      | 1.99E-10 | 0.003914 |
| 31Mar2011 | 6470  | 711.96  | -12.2792 | 5 K.KHMINVI chr5@449     | 2.81E-10 | 0.003518 |
| 31Mar2011 | 2515  | 574.3   | -24.3459 | 2 K.RMEKAG chr4@743      | 4.97E-10 | 0.006605 |
| 29Nov2011 | 21054 | 1101.59 | 26.84198 | 2 E.RGDFGGI chrX@161     | 2.00E-10 | 0.004711 |
| 29Nov2011 | 8933  | 767.4   | -20.2625 | 3 K.ITKFFTSI chr4@167    | 4.76E-12 | 0.001065 |
| 8Mar2011- | 17515 | 874.7   | -28.0725 | 4 K.TNSEQLR chr2@668     | 3.05E-10 | 0.006868 |
| 31May201  | 3016  | 497.26  | -28.9023 | 2 R.AEYPPFK Splice@chr   | 2.48E-10 | 0.008029 |
| 8Mar2011- | 2140  | 504.29  | 0.44639  | 3 R.K+14.016 chr5@132    | 2.84E-10 | 0.009231 |
| 8Mar2011- | 2243  | 504.29  | 0.44639  | 3 R.K+14.016 chr5@132    | 8.51E-11 | 0.003844 |
| 8Mar2011- | 1947  | 504.29  | 0.44639  | 3 R.K+14.016 chr5@132    | 3.48E-10 | 0.00768  |
| 8Mar2011- | 8843  | 972.48  | 0.105485 | 3 _CFNFIFS chr2@550      | 3.48E-10 | 0.008309 |
| 29Nov2011 | 8599  | 516.81  | -8.16474 | 2 K.LIDFIAGR chr2@113    | 1.47E-10 | 0.003814 |
| 8Mar2011- | 16993 | 1081.59 | 18.07507 | 2 K.CIFFRNT chr5@523     | 9.05E-11 | 0.004137 |
| 8Mar2011- | 6954  | 474.75  | 10.307   | 2 K.LNTVCDV chr1@500     | 3.65E-10 | 0.005598 |
| 29Nov2011 | 5857  | 703.35  | -8.08185 | 2 _RTPSASSI Splice@chr   | 8.06E-13 | 1.57E-04 |
| 31Mar2011 | 9310  | 676.34  | 21.23928 | 2 R.NCQCSSF Splice@chr   | 1.28E-10 | 0.00258  |
| 29Nov2011 | 7981  | 573.33  | 4.431536 | 2 _SLSGRDA chr4@758      | 2.20E-10 | 0.005734 |
| 8Mar2011- | 13534 | 626.34  | 7.12517  | 2 R.YMRGGG chr5@169      | 8.28E-11 | 0.002694 |
| 29Nov2011 | 11872 | 1122.09 | 15.1354  | 2 E.EK+14.01 chr2@625    | 2.45E-10 | 0.009196 |
| 31May201  | 2901  | 553.33  | 3.536218 | 2 K.KLEFSGRI chr2@145    | 4.31E-10 | 0.008485 |
| 31Mar2011 | 6195  | 965.97  | -18.9522 | 2 K.PQFYK+1 chr4@626     | 3.91E-10 | 0.006994 |
| 31Mar2011 | 2397  | 543.29  | -25.2111 | 2 K.K+14.016 chr1@500    | 5.44E-10 | 0.006043 |
| 8Mar2011- | 11601 | 954.17  | -5.72037 | 3 R.NINKNN chr4@157      | 2.75E-10 | 0.007336 |
| 8Mar2011- | 10981 | 468.51  | 7.376461 | 4 _GLDVDHI Splice@chr    | 3.05E-10 | 0.006277 |

|           |       |         |          |                          |          |          |
|-----------|-------|---------|----------|--------------------------|----------|----------|
| 29Nov2011 | 23288 | 1267.62 | -27.1771 | 2 K.FPKSVED chr5@8439    | 2.77E-11 | 5.25E-04 |
| 8Mar2011- | 13966 | 868.78  | -25.4932 | 3 _KFLK+14. chr2@9085    | 1.39E-10 | 0.005864 |
| 31Mar2011 | 4394  | 720.41  | 25.19856 | 2 S.RHPEIAYL chrX@6789   | 1.97E-10 | 0.006295 |
| 31Mar2011 | 4296  | 720.41  | 25.19856 | 2 S.RHPEIAYL chrX@6789   | 3.80E-10 | 0.004621 |
| 31Mar2011 | 4862  | 720.41  | 25.19856 | 2 S.RHPEIAYL chrX@6789   | 4.84E-10 | 0.007304 |
| 29Nov2011 | 6535  | 480.75  | -11.6409 | 4 _FQIFSV chr2@1428      | 1.75E-11 | 0.002053 |
| 29Nov2011 | 25324 | 956.52  | -16.2638 | 2 _FCIKCSPL chr1@8380    | 1.05E-10 | 0.002887 |
| 29Nov2011 | 18475 | 866.79  | -12.3878 | 3 K.SLVSQCV Splice@chr   | 2.32E-10 | 0.008078 |
| 29Nov2011 | 22907 | 866.79  | -12.3878 | 3 K.SLVSQCV Splice@chr   | 1.21E-10 | 0.003189 |
| 29Nov2011 | 21137 | 866.45  | -18.7122 | 3 K.SLVSQCV Splice@chr   | 9.84E-11 | 0.002404 |
| 8Mar2011- | 13311 | 819.44  | -24.6094 | 2 K.INIFKM+ chr4@4965    | 3.73E-11 | 7.60E-04 |
| 8Mar2011- | 13480 | 628.33  | -5.25389 | 2 _WPYGAP Splice@chr     | 1.44E-10 | 0.003628 |
| 31Mar2011 | 12228 | 813.76  | -5.68376 | 3 R.FILNSISSI Splice@chr | 3.10E-10 | 0.004745 |
| 29Nov2011 | 10244 | 1023.56 | -8.38931 | 2 K.KSM+15. chr2@1387    | 9.17E-11 | 0.004901 |
| 8Mar2011- | 17854 | 715.37  | 6.920693 | 2 R.CCSEIILFI chr2@6811  | 6.70E-11 | 0.002229 |
| 8Mar2011- | 2856  | 678.86  | -14.3705 | 2 E.ERVEETH chrX@2082    | 3.54E-10 | 0.008916 |
| 29Nov2011 | 6953  | 619.33  | 9.535167 | 2 R.KLRNSGS chr5@1280    | 1.85E-10 | 0.004713 |
| 29Nov2011 | 1212  | 890.51  | -20.7906 | 2 _EKNTK+1 chr1@6796     | 3.01E-10 | 0.007321 |
| 31May2011 | 4995  | 833.4   | 9.312362 | 2 _SNDLTK+ chr3@4535     | 2.09E-10 | 0.003497 |
| 31Mar2011 | 5538  | 642.32  | 22.33755 | 2 _VCHETFP chr3@1298     | 4.34E-11 | 0.00221  |
| 8Mar2011- | 11965 | 762.93  | 7.897192 | 2 K.CSKNSQII chr5@3746   | 3.62E-10 | 0.007646 |
| 8Mar2011- | 10620 | 762.93  | 7.897192 | 2 K.CSKNSQII chr5@3746   | 3.02E-10 | 0.008061 |
| 31May2011 | 4091  | 676.86  | 24.83544 | 2 K.NLLNWG chr5@3360     | 3.02E-10 | 0.007046 |
| 31May2011 | 2925  | 676.86  | 24.83544 | 2 K.NLLNWG Splice@chr    | 4.38E-10 | 0.008035 |
| 29Nov2011 | 14076 | 518.29  | -9.03299 | 2 _SSMLVSV Splice@chr    | 9.70E-12 | 0.00133  |
| 31Mar2011 | 10467 | 882.4   | -6.68503 | 2 K.SCRKAVS chr5@1732    | 5.07E-10 | 0.008163 |
| 31Mar2011 | 9529  | 977.5   | 11.53924 | 2 K.MK+14.0 chr2@1512    | 7.63E-12 | 0        |
| 31May2011 | 5263  | 1029.05 | 19.15768 | 2 R.ELGILIKV Splice@chr  | 6.39E-11 | 5.29E-04 |
| 31May2011 | 6026  | 1029.05 | 19.15768 | 2 R.ELGILIKV Splice@chr  | 4.13E-10 | 0.009588 |
| 31May2011 | 3929  | 1029.05 | 19.15768 | 2 R.ELGILIKV Splice@chr  | 2.85E-10 | 0.008317 |
| 31May2011 | 7101  | 1029.05 | 19.15768 | 2 R.ELGILIKV Splice@chr  | 1.17E-10 | 0.004432 |
| 29Nov2011 | 16220 | 1160.07 | 27.1065  | 2 K.FSVECK+ chr2@1272    | 2.22E-10 | 0.005165 |
| 29Nov2011 | 5974  | 988.5   | 12.63465 | 3 _RCLLDYD Splice@chr    | 4.77E-14 | 0        |
| 31Mar2011 | 9235  | 608.33  | -15.4766 | 2 R.EWTRRSF chrX@1210    | 1.12E-10 | 0.001228 |
| 31Mar2011 | 10412 | 601.35  | 12.56836 | 2 R.MPVM+1 chr2@7310     | 2.82E-10 | 0.004596 |
| 29Nov2011 | 14131 | 1078.58 | -18.444  | 2 R.M+15.99 chr4@3822    | 2.36E-10 | 0.006455 |
| 29Nov2011 | 13981 | 1078.58 | -18.444  | 2 R.M+15.99 chr4@3822    | 3.45E-10 | 0.00933  |
| 29Nov2011 | 13332 | 1078.57 | -27.7374 | 2 R.M+15.99 chr4@3822    | 4.05E-10 | 0.009317 |
| 29Nov2011 | 11564 | 1023.06 | -14.0336 | 2 K.KKENHRF chr2@8835    | 6.51E-11 | 0.002049 |
| 29Nov2011 | 20115 | 1142.12 | 16.93745 | 2 K.MHTKCK- chr4@1202    | 2.47E-10 | 0.006943 |
| 29Nov2011 | 19745 | 746.13  | -14.6622 | 4 R.LFM+15.5 chr5@1544   | 2.90E-10 | 0.007555 |
| 8Mar2011- | 9403  | 692.71  | -29.5136 | 3 _NLIDIIVK- chr4@1294   | 3.87E-10 | 0.008356 |
| 8Mar2011- | 10569 | 692.71  | -29.5136 | 3 _NLIDIIVK- chr4@1294   | 4.30E-10 | 0.00732  |
| 8Mar2011- | 10506 | 692.71  | -29.5136 | 3 _NLIDIIVK- chr4@1294   | 5.20E-10 | 0.00919  |
| 8Mar2011- | 8604  | 692.71  | -29.5136 | 3 _NLIDIIVK- chr4@1294   | 1.84E-10 | 0.004774 |
| 8Mar2011- | 15824 | 769.42  | -23.8029 | 2 K.KEK+14.0 chr2@5601   | 2.16E-10 | 0.005346 |
| 31May2011 | 1410  | 680.3   | 4.582428 | 2 K.CCDTMFI chr2@3462    | 6.77E-11 | 0.001549 |

|           |       |         |          |                         |          |          |
|-----------|-------|---------|----------|-------------------------|----------|----------|
| 29Nov2011 | 543   | 803.42  | -21.9061 | 1 R.GVGSQT\ chr5@5218   | 5.20E-11 | 0.001454 |
| 31Mar2011 | 5763  | 834.46  | 19.18708 | 2 _..NRNGRG chr1@3250   | 4.35E-10 | 0.009155 |
| 29Nov2011 | 21149 | 878.44  | -2.3304  | 2 R.SM+15.9\ chr3@3712  | 4.88E-11 | 0.001352 |
| 31Mar2011 | 10845 | 1039.6  | -15.2792 | 2 K.FLLLIWKI Splice@chr | 2.73E-10 | 0.004863 |
| 31Mar2011 | 16294 | 806.46  | -18.7374 | 1 K.VGKSMMKI chr4@5094  | 3.47E-10 | 0.006551 |
| 8Mar2011- | 19549 | 1160.9  | -17.7376 | 3 R.CAFYEFSI chrX@1760  | 2.27E-10 | 0.005346 |
| 8Mar2011- | 14835 | 874.98  | 13.89766 | 2 R.LINHNFIF chr5@5850  | 2.99E-12 | 0        |
| 31Mar2011 | 11417 | 797.75  | -21.5513 | 3 K.KMINAQI chr3@2132   | 7.06E-10 | 0.00895  |
| 31Mar2011 | 13516 | 797.75  | -21.5513 | 3 K.KMINAQI chr3@2132   | 1.77E-10 | 0.002517 |
| 31Mar2011 | 12198 | 797.75  | -21.5513 | 3 K.KMINAQI chr3@2132   | 1.78E-10 | 0.003601 |
| 31Mar2011 | 12121 | 976.57  | 4.073071 | 1 K.TVPLQVY chrX@1423   | 3.51E-10 | 0.004969 |
| 31Mar2011 | 8559  | 963.18  | 8.313655 | 3 K.ESWRSTF chr4@7559   | 1.99E-10 | 0.002706 |
| 8Mar2011- | 16703 | 1153.1  | 9.779666 | 2 K.NNLAVYC Splice@chr  | 2.43E-18 | 0        |
| 29Nov2011 | 12351 | 468.3   | 26.12359 | 2 R.VILLGNIG chr4@6198  | 1.72E-10 | 0.004598 |
| 29Nov2011 | 13259 | 1148.92 | 29.49282 | 3 K.WNCCSG Splice@chr   | 2.79E-10 | 0.009503 |
| 29Nov2011 | 14506 | 675.39  | -16.5622 | 2 R.SSFLK+14 chrX@1244  | 3.61E-10 | 0.009544 |
| 31Mar2011 | 11332 | 928.55  | -2.30328 | 1 R.RETRIPR. chr5@2199  | 5.63E-10 | 0.008549 |
| 31Mar2011 | 2703  | 416.56  | 23.99053 | 3 R.SIDTNDV chr3@1106   | 5.76E-10 | 0.00812  |
| 8Mar2011- | 19091 | 507.28  | -21.1368 | 4 K.VFLLHFF chr5@1115   | 6.20E-11 | 0.001464 |
| 29Nov2011 | 14127 | 639.38  | -24.3801 | 2 K.QKK+14.( chr1@1751  | 3.17E-10 | 0.006807 |
| 29Nov2011 | 1383  | 662.31  | -1.47672 | 1 _..DGQASGI chr1@9171  | 2.00E-10 | 0.009014 |
| 8Mar2011- | 12696 | 1098.57 | -9.98544 | 2 _..CRVDTKL Splice@chr | 3.92E-10 | 0.00953  |
| 29Nov2011 | 19052 | 716.41  | 6.313414 | 1 R.SAPASRK chrX@1469   | 3.72E-10 | 0.008738 |
| 8Mar2011- | 8051  | 897.42  | 13.15833 | 1 K.MRDGDF chr3@2711    | 2.23E-10 | 0.004966 |
| 29Nov2011 | 23731 | 1113.59 | 21.72464 | 3 R.ERQSPRS chr2@3953   | 2.10E-10 | 0.00516  |
| 31Mar2011 | 2717  | 517.26  | -13.4296 | 2 K.YDRVGA\ Splice@chr  | 3.53E-11 | 3.53E-04 |
| 8Mar2011- | 20796 | 891.96  | 20.73623 | 2 K.LMEVMN chr3@1269    | 2.03E-10 | 0.00401  |
| 8Mar2011- | 20930 | 891.95  | 9.494763 | 2 K.LMEVMN chr3@1269    | 2.13E-10 | 0.003473 |
| 8Mar2011- | 20293 | 891.96  | 20.73623 | 2 K.LMEVMN chr3@1269    | 1.64E-10 | 0.004547 |
| 29Nov2011 | 15137 | 686.14  | -17.015  | 4 K.TLQSTPS\ chr2@1226  | 2.28E-10 | 0.007955 |
| 8Mar2011- | 13511 | 895.42  | -21.0176 | 2 M.SCRFLSV chr2@6035   | 3.75E-10 | 0.009619 |
| 8Mar2011- | 16405 | 895.42  | -21.0176 | 2 M.SCRFLSV chr2@6035   | 3.34E-10 | 0.007169 |
| 31Mar2011 | 3378  | 505.93  | 4.996411 | 3 K.IMMMV\ chr1@1395    | 2.60E-10 | 0.003609 |
| 31Mar2011 | 2382  | 505.93  | 4.996411 | 3 K.IMMMV\ chr1@1395    | 1.10E-10 | 0.003459 |
| 29Nov2011 | 6507  | 655.42  | 1.541732 | 2 K.VLK GK+1 chr5@9301  | 8.02E-11 | 0.003074 |
| 31Mar2011 | 8086  | 803.43  | -21.2713 | 2 N.MILDML chrX@9850    | 6.83E-11 | 0.002379 |
| 31Mar2011 | 12281 | 884.99  | -14.5409 | 2 K.QIRNFSN chr5@2845   | 5.85E-10 | 0.007503 |
| 29Nov2011 | 11811 | 981.44  | -6.88137 | 2 K.KNYSNSV chr3@1309   | 5.83E-11 | 0.001413 |
| 31May2011 | 1744  | 675.85  | -26.7706 | 2 K.RGSIWGI chr2@5539   | 2.65E-10 | 0.007214 |
| 31May2011 | 8949  | 794.91  | -0.7688  | 2 R.HK+14.0\ chr4@6900  | 7.88E-11 | 0.003311 |
| 29Nov2011 | 4386  | 458.27  | 25.76222 | 2 R.PQMIASL chr4@8629   | 1.18E-10 | 0.003128 |
| 29Nov2011 | 6454  | 552.32  | -10.5172 | 2 S.IFVGGRG chr2@2192   | 2.96E-10 | 0.007625 |
| 8Mar2011- | 5332  | 438.24  | -16.4452 | 4 K.KQSNSK+ chr5@1207   | 3.56E-11 | 0.0017   |
| 31Mar2011 | 3762  | 461.73  | 2.72108  | 2 R.NSCSAAL\ chr5@1012  | 3.54E-10 | 0.009526 |
| 29Nov2011 | 536   | 552.31  | -27.4555 | 2 K.SLEKLEKT chr1@1192  | 3.02E-10 | 0.007749 |
| 29Nov2011 | 6601  | 546.05  | -15.9916 | 4 K.NLSVNQL chr5@1391   | 9.67E-11 | 0.004612 |
| 8Mar2011- | 15742 | 971.05  | 23.70335 | 2 R.KENLFFCI chr1@4938  | 2.30E-11 | 8.30E-04 |

|           |       |         |          |                          |          |          |
|-----------|-------|---------|----------|--------------------------|----------|----------|
| 31Mar2011 | 8522  | 932.92  | -19.124  | 2 K.ENESEWI chrX@9885    | 1.40E-10 | 0.003951 |
| 31May2011 | 10159 | 860.98  | -9.43938 | 2 L.ALALNNS chrX@5984    | 5.56E-11 | 0.001586 |
| 31May2011 | 6011  | 860.98  | -9.43938 | 2 L.ALALNNS chrX@5984    | 5.36E-11 | 0        |
| 29Nov2011 | 5656  | 627.41  | 25.13955 | 2 K.SRLRVKPI chrX@5865   | 9.37E-11 | 0.004551 |
| 31May2011 | 11250 | 808.96  | -27.7016 | 2 R.NKIEK+14 chr1@1472   | 3.40E-10 | 0.009024 |
| 31Mar2011 | 14707 | 819.38  | -21.2296 | 2 K.RM+15.9 Splice@chr   | 1.64E-10 | 0.003233 |
| 8Mar2011- | 3424  | 536.83  | 14.58061 | 2 K.KTGLVEN chr5@3022    | 3.99E-11 | 9.54E-04 |
| 8Mar2011- | 6534  | 878.52  | -1.32154 | 1 R.GTHVVPI chr2@1395    | 2.78E-10 | 0.007336 |
| 8Mar2011- | 6531  | 878.51  | -12.7285 | 1 R.GTHVVPI chr2@1395    | 3.41E-10 | 0.008211 |
| 8Mar2011- | 5799  | 878.52  | -1.32154 | 1 R.GTHVVPI chr2@1395    | 1.41E-10 | 0.003545 |
| 8Mar2011- | 6707  | 878.52  | -1.32154 | 1 R.GTHVVPI chr2@1395    | 5.35E-10 | 0.009475 |
| 8Mar2011- | 5980  | 878.52  | -1.32154 | 1 R.GTHVVPI chr2@1395    | 2.05E-10 | 0.005345 |
| 29Nov2011 | 13140 | 1146.63 | -17.2213 | 1 K.KCINNII chr4@7822    | 2.95E-10 | 0.006369 |
| 31Mar2011 | 67    | 630.31  | 4.170528 | 2 K.KKM+15. chr2@1520    | 5.03E-10 | 0.008606 |
| 8Mar2011- | 1588  | 417.22  | 24.63685 | 2 K.KEGGGGI chr3@9057    | 1.16E-10 | 0.003322 |
| 31Mar2011 | 5284  | 1003.56 | -12.1758 | 1 K.LTMVAAI chr3@8075    | 5.23E-10 | 0.006489 |
| 29Nov2011 | 12092 | 810.75  | -6.03005 | 3 _._DSLILQD5 Splice@chr | 2.68E-10 | 0.006659 |
| 31May2011 | 2585  | 874.96  | -25.1892 | 2 G.RFLEKCL chr4@1590    | 2.14E-10 | 0.005878 |
| 31May2011 | 3193  | 874.96  | -25.1892 | 2 G.RFLEKCL chr4@1590    | 2.01E-10 | 0.003861 |
| 29Nov2011 | 20178 | 809.48  | -3.32321 | 1 R.HLGTPRK chr4@2411    | 2.51E-10 | 0.006218 |
| 8Mar2011- | 17424 | 618.34  | 0.421235 | 4 _._YILLQNA1 chrX@2182  | 2.95E-10 | 0.005327 |
| 29Nov2011 | 13854 | 1102.03 | -13.5034 | 2 R.VWKFFNI chrX@9418    | 1.60E-10 | 0.006113 |
| 31Mar2011 | 7596  | 695.85  | 3.649566 | 2 K.STFFTTVI chr3@7634   | 6.52E-10 | 0.009147 |
| 8Mar2011- | 1903  | 855.35  | -24.8161 | 1 R.SCSANST Splice@chr   | 8.08E-11 | 0.001657 |
| 31Mar2011 | 9631  | 984.01  | 2.794083 | 2 F.KNISK+14 chrX@1315   | 5.33E-10 | 0.005949 |
| 31Mar2011 | 8060  | 984.51  | 1.087679 | 2 F.KNISK+14 chrX@1315   | 4.17E-10 | 0.007607 |
| 8Mar2011- | 20134 | 491.01  | -24.5182 | 4 K.TKENAIP chrX@8495    | 2.70E-11 | 8.45E-04 |
| 8Mar2011- | 20755 | 491.01  | -24.5182 | 4 K.TKENAIP chrX@8495    | 4.07E-10 | 0.008537 |
| 8Mar2011- | 20500 | 491.01  | -24.5182 | 4 K.TKENAIP chrX@8495    | 2.01E-10 | 0.003904 |
| 8Mar2011- | 19656 | 491.01  | -24.5182 | 4 K.TKENAIP chrX@8495    | 9.96E-11 | 0.00204  |
| 8Mar2011- | 20707 | 491.01  | -24.5182 | 4 K.TKENAIP chrX@8495    | 2.97E-10 | 0.005644 |
| 8Mar2011- | 20435 | 491.01  | -24.5182 | 4 K.TKENAIP chrX@8495    | 2.50E-10 | 0.004626 |
| 8Mar2011- | 19624 | 491.01  | -24.5182 | 4 K.TKENAIP chrX@8495    | 1.99E-10 | 0.003267 |
| 29Nov2011 | 14008 | 820.43  | -1.07939 | 2 R.KSTRLGTI Splice@chr  | 1.16E-10 | 0.001604 |
| 8Mar2011- | 3343  | 669.38  | 17.35093 | 2 K.ISRDQGS chr3@1326    | 1.63E-10 | 0.003615 |
| 29Nov2011 | 7324  | 876.45  | 1.082495 | 2 R.KTCKTEN Splice@chr   | 1.48E-12 | 1.76E-04 |
| 8Mar2011- | 1836  | 825.4   | 8.588314 | 1 R.FASGVCC chr4@1560    | 5.54E-10 | 0.009749 |
| 31May2011 | 5555  | 584.29  | -7.11553 | 2 R.QGTRNAI chr5@1835    | 2.40E-10 | 0.006974 |
| 29Nov2011 | 2767  | 437.26  | 16.29954 | 2 K.IILACGAR chr4@1157   | 2.23E-10 | 0.005987 |
| 29Nov2011 | 17833 | 1209.56 | -6.61953 | 1 L.SESESQEI chrX@1556   | 7.96E-11 | 0.001922 |
| 8Mar2011- | 18144 | 891.95  | -2.43213 | 2 R.SKTVCSV Splice@chr   | 4.20E-10 | 0.00875  |
| 29Nov2011 | 2879  | 587.4   | -20.989  | 2 K.FLIIGK+14 chr5@9790  | 1.56E-10 | 0.003923 |
| 8Mar2011- | 13608 | 577.79  | -13.7564 | 2 R.KSFVVAC chr1@2412    | 6.09E-11 | 0.001471 |
| 8Mar2011- | 12401 | 879.14  | -23.3383 | 3 K.RSMTQR chr5@8252     | 5.06E-10 | 0.009686 |
| 31Mar2011 | 7592  | 832.44  | -6.49934 | 2 K.NQRSIM Splice@chr    | 5.17E-10 | 0.008755 |
| 8Mar2011- | 15958 | 750     | -19.2312 | 5 K.SK+14.01 chr4@2597   | 3.37E-10 | 0.007161 |
| 29Nov2011 | 2098  | 866.48  | -21.6965 | 2 R.RRRVGR chr4@1545     | 1.52E-11 | 0.001494 |

|           |       |         |          |                          |          |          |
|-----------|-------|---------|----------|--------------------------|----------|----------|
| 31May2011 | 4745  | 684.32  | -28.4677 | 2 _..IQM+15.! Splice@chr | 5.02E-11 | 0.00135  |
| 8Mar2011- | 11769 | 735.87  | 5.279186 | 2 K.QSTM+1! chr1@8627    | 1.46E-10 | 0.003726 |
| 8Mar2011- | 14832 | 735.87  | 5.279186 | 2 K.QSTM+1! chr1@8627    | 2.30E-10 | 0.003714 |
| 8Mar2011- | 12947 | 735.87  | 5.279186 | 2 K.QSTM+1! chr1@8627    | 7.31E-11 | 0.001965 |
| 8Mar2011- | 15020 | 735.87  | 5.279186 | 2 K.QSTM+1! chr1@8627    | 1.96E-10 | 0.004974 |
| 31Mar2011 | 8292  | 763.41  | 10.69609 | 2 R.FTVYIPEL chrX@7836   | 1.16E-10 | 0.001412 |
| 31Mar2011 | 999   | 514.3   | -4.12217 | 3 K.K+14.016 chr2@1512   | 2.97E-10 | 0.004436 |
| 29Nov2011 | 5482  | 495.27  | 22.80927 | 2 R.ESVVSNP chr1@1456    | 1.18E-10 | 0.003454 |
| 31May2011 | 5752  | 768.79  | 8.51072  | 3 R.FLQRSVG chr4@8060    | 3.04E-10 | 0.006922 |
| 29Nov2011 | 11755 | 1001.01 | 2.596371 | 2 R.QLWSPPI Splice@chr   | 1.22E-10 | 0.003427 |
| 31Mar2011 | 2026  | 517.96  | -0.15742 | 3 K.TVNFLAN chr2@1227    | 5.81E-10 | 0.009766 |
| 31May2011 | 2587  | 517.96  | -0.15742 | 3 K.TVNFLAN chr2@1227    | 4.33E-10 | 0.008854 |
| 31May2011 | 2038  | 517.96  | -0.15742 | 3 K.TVNFLAN chr2@1227    | 1.79E-12 | 0        |
| 29Nov2011 | 20255 | 761.14  | 2.510773 | 4 K.MLIFIGEN Splice@chr  | 3.42E-10 | 0.006551 |
| 8Mar2011- | 19265 | 1063.85 | 2.47079  | 3 K.SGTIFDNI Splice@chr  | 1.34E-10 | 0.003984 |
| 8Mar2011- | 7798  | 1161.67 | 9.360483 | 1 R.SVSKSAIS chr3@2932   | 3.35E-10 | 0.008517 |
| 29Nov2011 | 17692 | 729.41  | -25.9023 | 3 K.MDIGK+1 chr2@7762    | 3.21E-10 | 0.009965 |
| 29Nov2011 | 12854 | 918.25  | -28.7453 | 4 R.LEGRRRR Splice@chr   | 6.38E-11 | 0.00425  |
| 31May2011 | 6848  | 653.82  | 6.35775  | 2 R.SSQSLEEI chr3@4406   | 1.20E-10 | 0.003873 |
| 31May2011 | 5245  | 653.82  | 6.35775  | 2 R.SSQSLEEI Splice@chr  | 2.21E-10 | 0.007156 |
| 31Mar2011 | 9635  | 481.06  | -27.8689 | 5 K.K+14.016 chr1@4914   | 4.48E-10 | 0.006816 |
| 31May2011 | 4833  | 522.31  | -12.6447 | 2 R.ILWILTER Splice@chr  | 2.28E-10 | 0.008528 |
| 31Mar2011 | 5526  | 504.23  | -13.7777 | 2 _..NSVGLDN chr5@5328   | 9.63E-11 | 0.001916 |
| 31May2011 | 9495  | 623.99  | 16.19839 | 3 K.QTQTKES chr2@3347    | 2.75E-10 | 0.00593  |
| 29Nov2011 | 22623 | 804.4   | -16.8366 | 2 K.TFLDFFLV chr2@7724   | 1.13E-11 | 4.80E-04 |
| 29Nov2011 | 20891 | 804.4   | -16.8366 | 2 K.TFLDFFLV chr2@7724   | 2.81E-10 | 0.006108 |
| 29Nov2011 | 22900 | 804.4   | -16.8366 | 2 K.TFLDFFLV chr2@7724   | 1.63E-11 | 5.79E-04 |
| 31Mar2011 | 9272  | 1064.2  | -9.16818 | 3 K.EDYYDSR chrX@7430    | 7.55E-10 | 0.009638 |
| 31Mar2011 | 1478  | 550.3   | -15.0004 | 2 K.NCKFFKK chr4@1166    | 5.93E-10 | 0.007686 |
| 31May2011 | 7427  | 972.48  | 4.335115 | 2 K.ENKEK+1 chr1@4017    | 4.91E-10 | 0.009022 |
| 31Mar2011 | 4257  | 846.45  | -19.3215 | 2 R.IQSPFQFI chr5@4801   | 5.74E-10 | 0.006785 |
| 31May2011 | 976   | 405.21  | -4.37903 | 2 K.IEFASSR. chr4@9143   | 3.86E-09 | 0        |
| 31May2011 | 1110  | 405.21  | -4.37903 | 2 K.IEFASSR. chr4@9143   | 3.34E-09 | 0        |
| 31May2011 | 1061  | 405.21  | -4.37903 | 2 K.IEFASSR. chr4@9143   | 3.34E-09 | 0        |
| 29Nov2011 | 17410 | 1050.1  | -29.205  | 2 K.KFQK+14 chr5@2023    | 4.21E-11 | 6.62E-04 |
| 29Nov2011 | 21447 | 1050.11 | -19.6639 | 2 K.KFQKNLK chr5@2023    | 1.84E-10 | 0.004295 |
| 8Mar2011- | 7310  | 552.35  | -1.66054 | 2 K.KVEIFRIA chr5@1914   | 1.83E-10 | 0.005344 |
| 8Mar2011- | 6549  | 552.35  | -1.66054 | 2 K.KVEIFRIA chr5@1914   | 1.23E-10 | 0.003026 |
| 29Nov2011 | 18353 | 1245.69 | 24.71513 | 1 R.EEWIENK chr2@1034    | 7.48E-11 | 0.002055 |
| 29Nov2011 | 6146  | 784.02  | -1.94864 | 3 _..TYNYWTI Splice@chr  | 8.60E-15 | 0        |
| 29Nov2011 | 3196  | 699.39  | 2.971441 | 2 K.IQSVLEFS chr5@1496   | 3.08E-10 | 0.008486 |
| 29Nov2011 | 2390  | 699.39  | 2.971441 | 2 K.IQSVLEFS chr5@1496   | 3.20E-10 | 0.008009 |
| 29Nov2011 | 15451 | 591     | 3.486044 | 3 R.PRRGDAL chr3@3497    | 1.75E-10 | 0.004633 |
| 31Mar2011 | 6423  | 717.41  | -19.5949 | 2 _..KISELK+1 chr2@3344  | 4.74E-10 | 0.00838  |
| 29Nov2011 | 12936 | 947.98  | -16.4106 | 2 R.FQM+15. chr4@9714    | 4.25E-10 | 0.009438 |
| 31May2011 | 1369  | 904.42  | -6.08043 | 2 R.SRK+14.C Splice@chr  | 1.33E-09 | 0.009009 |
| 31May2011 | 1348  | 904.43  | 4.999461 | 2 R.SRK+14.C Splice@chr  | 1.42E-09 | 0.009009 |

|           |       |         |          |                         |          |          |
|-----------|-------|---------|----------|-------------------------|----------|----------|
| 8Mar2011- | 1778  | 512.93  | -8.74327 | 3 R.ATK+14.C chr4@5460  | 1.92E-10 | 0.005545 |
| 29Nov2011 | 13511 | 1141.3  | 16.77173 | 3 K.LNYIQSLK chrX@1568  | 3.15E-10 | 0.008598 |
| 31Mar2011 | 6146  | 1019.2  | 1.699695 | 3 R.FWWK+1 chr2@1367    | 1.87E-10 | 0.002591 |
| 31Mar2011 | 7761  | 1003.99 | -12.3278 | 2 K.FLLFACSF Splice@chr | 2.19E-10 | 0.003477 |
| 29Nov2011 | 11013 | 765.39  | -13.8137 | 4 K.ILGHHSF\ chr3@1025  | 4.86E-12 | 2.13E-04 |
| 31Mar2011 | 12248 | 636.83  | -21.2938 | 4 _PQFK+14 Splice@chr   | 3.30E-10 | 0.008447 |
| 31Mar2011 | 10309 | 1076.88 | -19.515  | 3 K.IYFQFTCF chr4@1074  | 4.69E-10 | 0.004681 |
| 31May2011 | 6348  | 667.02  | -16.2276 | 3 K.VLYKSKN chr4@1645   | 6.16E-11 | 0.001009 |
| 31May2011 | 7773  | 667.02  | -16.2276 | 3 K.VLYKSKN chr4@1645   | 2.82E-10 | 0.004908 |
| 31May2011 | 7335  | 667.02  | -16.2276 | 3 K.VLYKSKN chr4@1645   | 2.98E-10 | 0.008511 |
| 31May2011 | 9256  | 667.02  | -16.2276 | 3 K.VLYKSKN chr4@1645   | 2.24E-10 | 0.00546  |
| 31May2011 | 7479  | 667.02  | -16.2276 | 3 K.VLYKSKN chr4@1645   | 5.41E-10 | 0.009199 |
| 31Mar2011 | 8327  | 922.48  | -18.5217 | 2 C.FIFTQPV chr2@1309   | 6.11E-10 | 0.007851 |
| 8Mar2011- | 8613  | 503.26  | 26.79652 | 2 R.SSIEGDEL chrX@2185  | 7.90E-11 | 0.002972 |
| 29Nov2011 | 17204 | 1100.59 | -0.85978 | 2 K.NRATELC chr3@1149   | 3.82E-11 | 0.002516 |
| 31Mar2011 | 10213 | 603.85  | 17.58284 | 2 K.KIVVGLS\ chr1@9111  | 2.98E-10 | 0.003125 |
| 31Mar2011 | 9614  | 881.49  | -2.94656 | 2 _K+14.016 chr5@8365   | 5.80E-10 | 0.007994 |
| 31May2011 | 6640  | 721.06  | 22.19195 | 3 R.CLM+15.1 chr3@1149  | 2.60E-10 | 0.007487 |
| 29Nov2011 | 17718 | 1054.53 | 28.31625 | 2 R.NM+15.9 chrX@2535   | 3.73E-11 | 6.62E-04 |
| 8Mar2011- | 17969 | 782.91  | -21.6221 | 2 K.VEEIWHN chr1@2690   | 5.87E-11 | 7.89E-04 |
| 8Mar2011- | 18935 | 1184.72 | -26.6055 | 3 K.KRKKREK chr2@2938   | 5.86E-11 | 0.00147  |
| 29Nov2011 | 1744  | 491.25  | 12.21584 | 2 K.TMQTMF chr3@5855    | 4.04E-10 | 0.008613 |
| 31Mar2011 | 5903  | 586.31  | -3.82358 | 3 A.IMNGDFI chr2@9195   | 2.60E-10 | 0.00356  |
| 8Mar2011- | 11172 | 1020.78 | 3.133981 | 3 R.MQVLHE Splice@chr   | 1.80E-15 | 0        |
| 29Nov2011 | 16563 | 799.91  | 0.268908 | 2 K.M+15.99 chr2@6908   | 4.31E-10 | 0.009438 |
| 31Mar2011 | 11908 | 903.95  | -7.01438 | 4 _K+14.016 chr4@1098   | 2.02E-10 | 0.002428 |
| 8Mar2011- | 2191  | 904.52  | 11.66073 | 2 _SVPPLRG Splice@chr   | 1.06E-11 | 2.70E-04 |
| 31Mar2011 | 10366 | 784.41  | 21.86971 | 2 K.NFCQMA chrX@4421    | 6.12E-10 | 0.008159 |
| 31Mar2011 | 13671 | 738.44  | 7.710805 | 1 _GTPIPPR. Splice@chr  | 6.90E-10 | 0.009033 |
| 31May2011 | 2903  | 624.31  | -16.4132 | 2 R.RATNNSL Splice@chr  | 5.50E-11 | 0.001586 |
| 31May2011 | 3639  | 624.31  | -16.4132 | 2 R.RATNNSL Splice@chr  | 2.49E-10 | 0.005408 |
| 31May2011 | 3671  | 624.31  | -16.4132 | 2 R.RATNNSL Splice@chr  | 4.89E-11 | 6.52E-04 |
| 8Mar2011- | 12042 | 1046.53 | -1.0508  | 1 R.FFQKDSF chrX@9840   | 4.19E-10 | 0.007913 |
| 29Nov2011 | 22198 | 1027.55 | 4.075861 | 2 R.NLFFLTAI chr2@6925  | 2.50E-10 | 0.006218 |
| 8Mar2011- | 3779  | 473.94  | 18.4985  | 3 R.MDVFGG chr5@2190    | 3.31E-12 | 0        |
| 8Mar2011- | 5574  | 473.94  | 18.4985  | 3 R.MDVFGG chr5@2190    | 1.42E-10 | 0.003545 |
| 31Mar2011 | 5737  | 770.93  | -12.9683 | 2 K.KIAKEWK chr4@1305   | 1.34E-10 | 0.001008 |
| 29Nov2011 | 27775 | 819.43  | -6.18982 | 4 R.GATGEKI chrX@2657   | 6.81E-11 | 0.002139 |
| 8Mar2011- | 21791 | 953.03  | -24.9286 | 4 K.MLENAL\ chr2@1428   | 2.00E-10 | 0.002921 |
| 29Nov2011 | 6498  | 478.28  | 26.82272 | 2 K.KKASGGC chr1@1341   | 1.79E-10 | 0.006921 |
| 8Mar2011- | 3102  | 446.29  | 6.168221 | 2 R.YGKIVALI chr3@2680  | 8.78E-11 | 0.002149 |
| 31Mar2011 | 12776 | 1091.87 | -14.3084 | 3 R.FLQHAM Splice@chr   | 5.21E-10 | 0.004953 |
| 8Mar2011- | 4233  | 775.42  | 2.643401 | 2 R.IM+15.95 chr5@5695  | 1.30E-10 | 0.003378 |
| 29Nov2011 | 21833 | 1130.56 | 22.55496 | 1 K.M+15.99 chrX@1791   | 4.19E-10 | 0.009438 |
| 29Nov2011 | 13416 | 790.4   | -13.2829 | 4 I.FPIMGKAI chr5@3945  | 2.66E-10 | 0.009899 |
| 8Mar2011- | 2351  | 641.84  | -14.4768 | 2 K.KEVRGGY chr1@4665   | 2.14E-10 | 0.00601  |
| 8Mar2011- | 13919 | 894.47  | -21.3132 | 2 R.VWDCKR chr3@4720    | 1.75E-10 | 0.007277 |

|           |       |         |          |                          |          |          |
|-----------|-------|---------|----------|--------------------------|----------|----------|
| 31Mar2011 | 2716  | 603.84  | -10.3271 | 2 K.KNQEKVF chr4@1656    | 5.15E-10 | 0.00903  |
| 29Nov2011 | 20318 | 699.73  | -2.21293 | 3 E.LSK+14.0 chr5@1775   | 1.32E-11 | 4.80E-04 |
| 8Mar2011- | 9618  | 575.33  | -0.39776 | 4 K.TSK+14.0 chr4@4760   | 2.94E-10 | 0.008352 |
| 29Nov2011 | 16637 | 990.52  | 7.499314 | 2 _._FKYTMA\ Splice@chr  | 3.09E-10 | 0.00682  |
| 31Mar2011 | 5120  | 832.44  | 29.34702 | 2 R.NENDRT\ Splice@chr   | 3.41E-10 | 0.004995 |
| 8Mar2011- | 3142  | 554.3   | -5.73623 | 2 K.KMYPGN chr2@1402     | 4.38E-10 | 0.009171 |
| 31Mar2011 | 4524  | 600.72  | -4.7028  | 5 K.QAICQKD chr3@1371    | 3.33E-10 | 0.004554 |
| 8Mar2011- | 17360 | 957     | -22.9626 | 2 K.M+15.99 Splice@chr   | 3.35E-10 | 0.008384 |
| 8Mar2011- | 16597 | 872.04  | -14.7573 | 2 K.KVAWKIL chr2@1475    | 3.34E-10 | 0.008384 |
| 29Nov2011 | 8140  | 480.75  | -8.11365 | 4 _._YISVK+14 chrX@1481  | 1.43E-11 | 0.001398 |
| 31May2011 | 3837  | 654.35  | -29.4006 | 2 K.K+14.016 chrX@7095   | 1.43E-10 | 0.005201 |
| 31Mar2011 | 2721  | 417.24  | 28.54621 | 3 K.MSK+14.1 chr2@1328   | 3.41E-10 | 0.003222 |
| 31Mar2011 | 1807  | 417.24  | 28.54621 | 3 K.MSK+14.1 chr2@1328   | 1.96E-10 | 0.005786 |
| 31Mar2011 | 1862  | 417.24  | 28.54621 | 3 K.MSK+14.1 chr2@1328   | 1.21E-10 | 0.002501 |
| 31Mar2011 | 1661  | 417.24  | 28.54621 | 3 K.MSK+14.1 chr2@1328   | 6.16E-10 | 0.007747 |
| 29Nov2011 | 6427  | 615.86  | -10.5788 | 2 K.GNSK+14 chr4@5376    | 1.75E-10 | 0.006868 |
| 31Mar2011 | 8952  | 1022.86 | 5.915934 | 3 Q.DKEQVG Splice@chr    | 1.77E-14 | 0        |
| 31Mar2011 | 8304  | 1022.86 | 5.915934 | 3 Q.DKEQVG Splice@chr    | 2.89E-12 | 0        |
| 31Mar2011 | 8907  | 1022.86 | 5.915934 | 3 Q.DKEQVG Splice@chr    | 1.23E-14 | 0        |
| 31Mar2011 | 8870  | 1022.86 | 5.915934 | 3 Q.DKEQVG Splice@chr    | 2.17E-13 | 0        |
| 31Mar2011 | 3536  | 541.77  | -7.19768 | 4 _._KKSQETI\ chr4@8326  | 5.09E-10 | 0.008016 |
| 8Mar2011- | 19905 | 1046.59 | 23.00002 | 2 R.KFMCFES chr5@7956    | 4.35E-10 | 0.008808 |
| 8Mar2011- | 15408 | 891.5   | -12.3087 | 2 I.SKTIVHSC chrX@9761   | 5.35E-11 | 0.002024 |
| 29Nov2011 | 16451 | 942.5   | 23.33866 | 3 R.NSHKNT\ chrX@8418    | 1.76E-10 | 0.004599 |
| 8Mar2011- | 5118  | 474.76  | -27.3386 | 2 _._LSSAVMA\ Splice@chr | 4.61E-10 | 0.009182 |
| 8Mar2011- | 7565  | 474.26  | -23.7943 | 2 _._LSSAVMA\ Splice@chr | 2.73E-10 | 0.006161 |
| 8Mar2011- | 7552  | 474.26  | -23.7943 | 2 _._LSSAVMA\ Splice@chr | 4.74E-10 | 0.009487 |
| 31May2011 | 5690  | 808.96  | -2.94617 | 2 R.ELRKWLK Splice@chr   | 9.89E-11 | 0.002254 |
| 31May2011 | 8924  | 1086.69 | 20.57631 | 1 _._GIKILTYH chr2@4366  | 1.65E-11 | 0        |
| 8Mar2011- | 16667 | 772.06  | -16.4445 | 3 _._SEINWSH Splice@chr  | 1.15E-10 | 0.003361 |
| 29Nov2011 | 24786 | 852.81  | -25.2068 | 3 R.FK+14.01 chr1@1504   | 2.43E-10 | 0.005312 |
| 31May2011 | 9378  | 761.42  | -23.7581 | 3 K.VLRHQKF Splice@chr   | 4.01E-11 | 6.52E-04 |
| 8Mar2011- | 21050 | 1087.61 | 27.86142 | 2 K.KRMKRK- chr5@1281    | 6.43E-11 | 0.001315 |
| 31Mar2011 | 5927  | 1006.5  | -23.4106 | 2 Y.KKNNDM chr5@1145     | 7.63E-10 | 0.009635 |
| 8Mar2011- | 22193 | 931.97  | -19.4479 | 2 R.FQCPIER\ chr2@1174   | 2.35E-10 | 0.003807 |
| 29Nov2011 | 1265  | 439.74  | -10.861  | 2 R.AEAAKPY chr5@1011    | 1.68E-10 | 0.003544 |
| 8Mar2011- | 2038  | 657.42  | 23.24628 | 1 R.GALVAAF chr4@4658    | 2.76E-10 | 0.005304 |
| 8Mar2011- | 2946  | 488.28  | 27.11848 | 3 K.LSTGLEW Splice@chr   | 1.81E-10 | 0.007415 |
| 29Nov2011 | 6658  | 799.43  | 27.11877 | 2 K.QKK+14.1 chr4@1597   | 2.85E-11 | 0.001474 |
| 8Mar2011- | 13412 | 726.9   | -25.703  | 2 K.TLFLKYN\ chr4@5575   | 2.74E-10 | 0.004287 |
| 31Mar2011 | 7885  | 624.34  | -13.8062 | 2 R.IQKM+15 Splice@chr   | 3.15E-10 | 0.005734 |
| 31Mar2011 | 5751  | 738.89  | -14.8561 | 2 K.KMIWPM Splice@chr    | 3.10E-10 | 0.004399 |
| 31Mar2011 | 5566  | 738.89  | -14.8561 | 2 K.KMIWPM Splice@chr    | 5.17E-10 | 0.007447 |
| 29Nov2011 | 20270 | 817.16  | -9.63066 | 4 _._K+14.016 Splice@chr | 4.48E-10 | 0.009254 |
| 31Mar2011 | 10947 | 670.36  | -15.866  | 2 K.DHLSNDL chr1@8354    | 9.35E-11 | 0.002338 |
| 8Mar2011- | 17192 | 789.97  | -12.9647 | 2 K.KVSNFK+ chr2@1452    | 4.68E-10 | 0.009182 |
| 8Mar2011- | 19004 | 640.88  | 0.667706 | 2 P.PKKSIVPF Splice@chr  | 1.10E-10 | 0.002411 |

|           |       |         |          |                         |          |          |
|-----------|-------|---------|----------|-------------------------|----------|----------|
| 31May2011 | 7043  | 755.42  | 4.530659 | 2 K.SFQKK+1 chr1@1070   | 1.94E-10 | 0.004439 |
| 29Nov2011 | 8345  | 503.96  | -12.2161 | 3 R.KKMYKN chrX@2411    | 8.44E-11 | 0.001365 |
| 31Mar2011 | 4280  | 725.88  | 7.205728 | 2 R.QEVQRAI Splice@chr  | 7.18E-11 | 0.001865 |
| 29Nov2011 | 3572  | 489.61  | 5.579697 | 3 R.LIGHTVL chr3@1149   | 2.52E-10 | 0.008296 |
| 31Mar2011 | 818   | 593.03  | -8.42299 | 3 K.KKKILTSS chr5@3758  | 6.85E-10 | 0.009177 |
| 29Nov2011 | 2187  | 735.39  | -23.7692 | 1 K.TVLSGM chr4@1297    | 2.99E-10 | 0.00658  |
| 31May2011 | 1680  | 735.39  | -23.7692 | 1 K.TVLSGM chr4@1297    | 4.72E-10 | 0.009957 |
| 31May2011 | 1559  | 735.39  | -23.7692 | 1 K.TVLSGM chr4@1297    | 4.72E-10 | 0.009957 |
| 31May2011 | 1692  | 735.39  | -23.7692 | 1 K.TVLSGM chr4@1297    | 4.72E-10 | 0.009957 |
| 31May2011 | 1831  | 735.39  | -23.7692 | 1 K.TVLSGM chr4@1297    | 4.72E-10 | 0.009917 |
| 31May2011 | 1932  | 735.39  | -23.7692 | 1 K.TVLSGM chr4@1297    | 4.72E-10 | 0.008708 |
| 31May2011 | 1985  | 735.39  | -23.7692 | 1 K.TVLSGM chr4@1297    | 4.72E-10 | 0.008708 |
| 31May2011 | 1965  | 735.39  | -23.7692 | 1 K.TVLSGM chr4@1297    | 4.72E-10 | 0.008708 |
| 31May2011 | 1670  | 735.39  | -23.7692 | 1 K.TVLSGM chr4@1297    | 3.26E-10 | 0.00911  |
| 31May2011 | 1637  | 735.39  | -23.7692 | 1 K.TVLSGM chr4@1297    | 3.04E-10 | 0.008852 |
| 31May2011 | 1596  | 735.39  | -23.7692 | 1 K.TVLSGM chr4@1297    | 2.99E-10 | 0.008852 |
| 31May2011 | 1701  | 735.39  | -23.7692 | 1 K.TVLSGM chr4@1297    | 2.99E-10 | 0.008852 |
| 29Nov2011 | 5102  | 412.21  | 6.234141 | 3 K.EPFGAQT Splice@chr  | 1.65E-10 | 0.004224 |
| 29Nov2011 | 1586  | 451.74  | -24.9831 | 2 K.LSGILDER chr5@5829  | 4.53E-10 | 0.009725 |
| 8Mar2011- | 14397 | 942.47  | -20.0741 | 2 R.CKMRTET chr5@5701   | 3.17E-10 | 0.009774 |
| 8Mar2011- | 14150 | 1053.51 | -22.1132 | 3 T.M+15.99 Splice@chr  | 3.59E-11 | 0.001318 |
| 31Mar2011 | 943   | 506.26  | -18.0148 | 2 R.KYGETR Splice@chr   | 4.28E-10 | 0.006555 |
| 8Mar2011- | 20093 | 1014.48 | -24.5929 | 1 _SSSKNFT Splice@chr   | 2.23E-10 | 0.005874 |
| 31Mar2011 | 1902  | 725.4   | -3.24465 | 2 L.QMALQE chr2@1345    | 4.72E-10 | 0.007451 |
| 31Mar2011 | 3933  | 894.44  | -16.1905 | 2 _VCFCQAL chr4@1346    | 3.27E-10 | 0.006278 |
| 8Mar2011- | 19608 | 1019.51 | -26.6486 | 2 K.LK+14.01 chr1@3616  | 2.01E-10 | 0.006222 |
| 8Mar2011- | 14116 | 830.19  | 7.014062 | 4 L.SPIEVPC Splice@chr  | 4.40E-12 | 1.78E-04 |
| 31May2011 | 7255  | 955.54  | 25.79885 | 1 R.SNLGASL chr4@1090   | 3.34E-11 | 0.001245 |
| 31May2011 | 5887  | 566.81  | -23.049  | 2 R.LYHIGLLM chr4@9290  | 1.26E-10 | 0.003195 |
| 29Nov2011 | 19995 | 808.41  | -19.9387 | 3 K.EFQKK+1 Splice@chr  | 1.65E-10 | 0.003869 |
| 8Mar2011- | 18302 | 685.71  | -3.06095 | 3 K.YPVYSK+ chr3@5207   | 2.95E-10 | 0.005222 |
| 8Mar2011- | 15032 | 685.71  | -3.06095 | 3 K.YPVYSK+ chr3@5207   | 3.24E-10 | 0.008363 |
| 29Nov2011 | 9372  | 688.11  | -1.93197 | 4 _NRELREE chr3@4411    | 4.99E-11 | 0.002414 |
| 31Mar2011 | 8422  | 771.4   | 14.78691 | 2 K.YRHSANS chr2@4164   | 3.27E-10 | 0.003681 |
| 29Nov2011 | 12169 | 1194.64 | 11.79238 | 2 K.YARNRGT Splice@chr  | 2.81E-10 | 0.007976 |
| 31May2011 | 6262  | 1145.56 | -4.26612 | 2 R.RRQCELS chr2@1367   | 1.33E-10 | 0.005249 |
| 29Nov2011 | 16548 | 1311.67 | -29.0447 | 2 K.KM+15.9 chrX@1613   | 4.08E-11 | 4.25E-04 |
| 8Mar2011- | 16140 | 967.51  | -20.1087 | 3 R.PSIHIYPS Splice@chr | 2.33E-12 | 0        |
| 29Nov2011 | 3055  | 502.62  | -29.4228 | 3 _EK+14.01 Splice@chr  | 1.61E-10 | 0.006973 |
| 31Mar2011 | 2450  | 432.73  | -19.6509 | 2 R.TFRGGAC chr5@2007   | 2.75E-10 | 0.002488 |
| 29Nov2011 | 15118 | 832.44  | 27.89645 | 4 _IEIIFLGFK Splice@chr | 2.97E-10 | 0.006452 |
| 8Mar2011- | 13545 | 839.46  | -23.8528 | 2 F.LSKNFLDI chr3@7356  | 3.79E-10 | 0.008607 |
| 29Nov2011 | 12377 | 572.64  | -11.9286 | 3 K.WKKNME chr1@6808    | 3.33E-10 | 0.009312 |
| 29Nov2011 | 2204  | 473.77  | -16.411  | 2 K.ISSAPMV chr1@5478   | 6.50E-11 | 0.001447 |
| 29Nov2011 | 25092 | 1101.57 | -10.624  | 2 _GACHKKF Splice@chr   | 3.29E-10 | 0.007863 |
| 29Nov2011 | 21211 | 1238.61 | -21.6824 | 2 _RLTCCYL chrX@4331    | 3.06E-10 | 0.006551 |
| 31May2011 | 11378 | 846.97  | -4.97824 | 2 R.EVRRKCA Splice@chr  | 2.62E-10 | 0.007214 |

|            |       |         |          |                         |          |          |
|------------|-------|---------|----------|-------------------------|----------|----------|
| 31May2011- | 10841 | 1007.48 | -18.1095 | 2 K.LMEFSEN Splice@chr  | 3.29E-10 | 0.009139 |
| 29Nov2011  | 7342  | 682.02  | -3.496   | 3 P.FSVENLV Splice@chr  | 1.57E-10 | 0.006538 |
| 8Mar2011-  | 19291 | 1062.1  | -20.8023 | 2 K.FLKFNrk chr2@1221   | 4.16E-10 | 0.008585 |
| 29Nov2011  | 6349  | 571.87  | -15.247  | 2 R.IPIKTKK Splice@chr  | 2.16E-10 | 0.004841 |
| 8Mar2011-  | 18926 | 918.49  | 15.10132 | 2 K.YEYKYSI chr5@1503   | 3.60E-10 | 0.00755  |
| 29Nov2011  | 5969  | 790.42  | 26.52051 | 2 K.K+14.016 chr4@7363  | 2.10E-10 | 0.008411 |
| 8Mar2011-  | 5302  | 448.26  | 24.72122 | 3 R.SPFGTHP chr4@1135   | 3.08E-10 | 0.006267 |
| 31May2011  | 5262  | 865.94  | 6.421584 | 2 _K.CDFYLIK chr5@1888  | 1.81E-10 | 0.003988 |
| 31May2011  | 5758  | 865.94  | 6.421584 | 2 _K.CDFYLIK chr5@1888  | 2.20E-10 | 0.004478 |
| 29Nov2011  | 12407 | 502.95  | -3.16154 | 3 K.NSEKTEK chr4@1501   | 2.65E-11 | 5.61E-04 |
| 31Mar2011  | 6266  | 558.3   | -13.2154 | 3 R.KFWNVP chrX@1472    | 5.54E-10 | 0.009747 |
| 31Mar2011  | 6838  | 790.93  | -11.6346 | 2 R.AGVYKSA chr2@6061   | 6.71E-11 | 0.001028 |
| 8Mar2011-  | 17649 | 929.47  | 10.53187 | 1 K.SAFFEWK chr3@2622   | 2.84E-10 | 0.005118 |
| 8Mar2011-  | 717   | 472.28  | 6.151833 | 2 _QAEIILEK chrX@6523   | 3.85E-10 | 0.009746 |
| 8Mar2011-  | 4462  | 453.58  | -8.59096 | 3 K.DVVEGEL chr3@3500   | 8.17E-11 | 0.002765 |
| 31Mar2011  | 6564  | 675.36  | -20.9665 | 2 A.KLCTSLG chrX@2956   | 8.59E-11 | 2.66E-04 |
| 31Mar2011  | 3749  | 543.96  | 2.697931 | 3 R.ALSSPSSS chrX@4741  | 1.69E-10 | 0.002796 |
| 8Mar2011-  | 17238 | 888.98  | -11.3808 | 2 L.KDIKNTLT chr1@1467  | 4.76E-10 | 0.009816 |
| 31Mar2011  | 12879 | 970.53  | 25.93766 | 3 R.KEKGAPR chr2@7335   | 5.05E-10 | 0.007296 |
| 31Mar2011  | 13101 | 805.4   | -24.9393 | 2 K.KMMSLQ chrX@9814    | 1.10E-10 | 0.002141 |
| 29Nov2011  | 10067 | 1015.57 | 27.31298 | 1 R.SSDLDLLF Splice@chr | 1.74E-11 | 0.00146  |
| 29Nov2011  | 7805  | 1157.6  | 12.90934 | 2 L.WQSIFESI Splice@chr | 1.27E-10 | 0.004891 |
| 29Nov2011  | 16412 | 924.82  | -2.97339 | 3 R.K+14.016 chr3@1436  | 3.04E-10 | 0.008583 |
| 8Mar2011-  | 3863  | 729.47  | -22.7617 | 2 K.QK+14.0 Splice@chr  | 5.09E-10 | 0.009985 |
| 29Nov2011  | 18482 | 801.98  | -28.0194 | 2 K.LVFFLFFR chr5@4538  | 2.29E-10 | 0.005237 |
| 31May2011  | 6796  | 832.43  | 12.25971 | 4 K.M+15.99 Splice@chr  | 2.08E-10 | 0.004439 |
| 29Nov2011  | 12486 | 1151.58 | 16.23285 | 2 K.MCIQCAI Splice@chr  | 2.54E-10 | 0.006302 |
| 8Mar2011-  | 21467 | 812.48  | 20.98552 | 1 R.K+14.016 chr2@1056  | 4.07E-10 | 0.009579 |
| 31May2011  | 3390  | 1192.57 | -29.0794 | 2 R.FAENFNS chr5@1886   | 1.60E-10 | 0.00448  |
| 31Mar2011  | 13798 | 1161.27 | -28.055  | 3 _YQALVK+ Splice@chr   | 2.37E-10 | 0.003519 |
| 8Mar2011-  | 12139 | 1103.54 | -14.0831 | 3 A.QTHPLAL Splice@chr  | 2.66E-13 | 0        |
| 8Mar2011-  | 12093 | 1103.54 | -14.0831 | 3 A.QTHPLAL Splice@chr  | 3.92E-13 | 0        |
| 31Mar2011  | 5896  | 606.86  | -28.6101 | 2 K.VLK+14.0 chr2@1991  | 1.18E-10 | 0.001032 |
| 31Mar2011  | 6272  | 1019.2  | -3.09744 | 3 K.LLAISLNC chr1@1108  | 2.13E-10 | 0.003257 |
| 31Mar2011  | 7755  | 728.05  | -12.2892 | 3 N.VLIWLRC chr1@1222   | 5.23E-10 | 0.006925 |
| 31Mar2011  | 11306 | 665.37  | -9.83003 | 2 R.AICVLDA chr1@3903   | 4.40E-10 | 0.008494 |
| 31Mar2011  | 8084  | 831.95  | -26.2109 | 4 K.LEKNYQN chr3@1266   | 5.56E-10 | 0.007747 |
| 8Mar2011-  | 12551 | 1006.5  | -7.80294 | 2 R.FFVIFTTT Splice@chr | 2.79E-10 | 0.005118 |
| 31May2011  | 4229  | 871.45  | -20.1006 | 3 K.KSRKNKE chr3@2487   | 4.83E-10 | 0.005247 |
| 31May2011  | 5586  | 1194.59 | -3.75917 | 2 K.FQKEISTV chr3@9715  | 2.26E-10 | 0.005682 |
| 31May2011  | 5673  | 1194.59 | -3.75917 | 2 K.FQKEISTV chr3@9715  | 2.61E-10 | 0.00813  |
| 31Mar2011  | 10093 | 656.63  | 11.82321 | 4 R.KIPRQSLT chr4@4951  | 1.63E-10 | 0.005644 |
| 31Mar2011  | 835   | 559.35  | -19.3484 | 2 K.KLIFGIWI Splice@chr | 9.33E-11 | 0.001845 |
| 31Mar2011  | 1430  | 506.27  | -26.2731 | 2 _ATHLTQN chrX@5340    | 4.37E-10 | 0.004311 |
| 31Mar2011  | 1764  | 506.27  | -26.2731 | 2 _ATHLTQN chrX@5340    | 1.04E-10 | 0.001997 |
| 31Mar2011  | 6810  | 1119.61 | -15.7141 | 1 _TYLLRNP chr3@6690    | 3.83E-10 | 0.005919 |
| 8Mar2011-  | 1451  | 613.36  | 11.12456 | 2 _EKIILNEH Splice@chr  | 3.86E-10 | 0.006376 |

|           |       |         |          |                         |          |          |
|-----------|-------|---------|----------|-------------------------|----------|----------|
| 29Nov2011 | 4465  | 873.45  | 8.115307 | 1 R.TSTQSPP Splice@chr  | 1.67E-10 | 0.006346 |
| 31Mar2011 | 1969  | 572.64  | -10.6772 | 3 S.VVLM+15 chr1@959    | 6.89E-10 | 0.009227 |
| 8Mar2011- | 2142  | 723.38  | 22.70405 | 2 K.SRFSARYI chr1@129   | 3.66E-10 | 0.007641 |
| 8Mar2011- | 9531  | 674.83  | 6.21102  | 2 K.NQGVYSI chrX@565    | 7.75E-11 | 0.001383 |
| 31Mar2011 | 11702 | 1010.2  | 25.67322 | 3 K.QIGSKFW Splice@chr  | 1.73E-10 | 0.002658 |
| 31Mar2011 | 6026  | 617.85  | -19.2944 | 2 K.PYTIAGK- chrX@621   | 4.80E-10 | 0.008606 |
| 29Nov2011 | 5617  | 747.4   | -28.6787 | 2 R.IKYWESL' Splice@chr | 4.09E-11 | 8.23E-04 |
| 8Mar2011- | 12700 | 510.29  | -16.2987 | 2 K.YTASLPVI Splice@chr | 1.82E-10 | 0.005696 |
| 29Nov2011 | 18746 | 729.39  | -13.7083 | 2 K.RM+15.9 chrX@155    | 6.04E-11 | 0.001881 |
| 29Nov2011 | 13106 | 916.48  | -10.4672 | 2 K.CWLESKS Splice@chr  | 2.43E-10 | 0.009046 |
| 31Mar2011 | 8131  | 1049.56 | -26.4087 | 2 K.WM+15.' Splice@chr  | 1.36E-10 | 9.37E-04 |
| 31Mar2011 | 366   | 466.98  | -17.134  | 4 _ .ENYLFGG Splice@chr | 4.25E-10 | 0.006486 |
| 29Nov2011 | 6227  | 495.26  | 1.238328 | 2 K.SRHASQF Splice@chr  | 3.39E-10 | 0.009684 |
| 8Mar2011- | 2407  | 407.87  | -2.80026 | 3 K.K+14.016 chrX@146   | 3.66E-10 | 0.009423 |
| 8Mar2011- | 17231 | 821.45  | -25.7165 | 2 R.GRFKNEF chr2@186    | 2.19E-10 | 0.003573 |
| 29Nov2011 | 18195 | 1225.57 | 16.94671 | 1 K.CCKIQTN chr4@114    | 3.23E-10 | 0.009199 |
| 8Mar2011- | 1123  | 430.74  | 5.903697 | 2 R.QVNGGE chr2@825     | 3.33E-10 | 0.007678 |
| 8Mar2011- | 10073 | 649.33  | -5.80736 | 3 R.RENVEHC chrX@129    | 1.03E-10 | 0.002751 |
| 29Nov2011 | 21001 | 1257.08 | -19.6135 | 2 K.FSIPANCF chr5@204   | 2.95E-10 | 0.006369 |
| 8Mar2011- | 239   | 669.37  | 2.465659 | 1 R.GPATAPF chr3@521    | 3.50E-10 | 0.007361 |
| 31Mar2011 | 9525  | 459.77  | 13.83668 | 2 K.MIEGGRK chrX@761    | 2.45E-10 | 0.002133 |
| 29Nov2011 | 13917 | 920.5   | 18.56463 | 2 K.EEKEISRN chr5@186   | 2.14E-10 | 0.003884 |
| 8Mar2011- | 5718  | 822.45  | -8.61901 | 2 H.RFVDFPA chr5@199    | 3.20E-10 | 0.006267 |
| 31May2011 | 6620  | 606.34  | 7.058093 | 2 _ .LLDDAG chrX@163    | 1.99E-10 | 0.006607 |
| 8Mar2011- | 8506  | 616.86  | 0.396427 | 2 R.QVIHAGF Splice@chr  | 1.90E-10 | 0.005405 |
| 8Mar2011- | 12390 | 743.39  | 7.364743 | 2 K.LYFKFFSC chr4@865   | 3.69E-11 | 0.001037 |
| 31May2011 | 6244  | 879.42  | 24.85639 | 2 R.YASNSSD chr4@375    | 4.67E-10 | 0.007571 |
| 8Mar2011- | 14461 | 575.97  | 5.661636 | 3 R.EEQIIQPC Splice@chr | 3.58E-10 | 0.007446 |
| 8Mar2011- | 11508 | 942.97  | -28.8151 | 2 _ .MISEFIN\ chrX@593  | 2.28E-10 | 0.009234 |
| 8Mar2011- | 11566 | 942.97  | -28.8151 | 2 _ .MISEFIN\ chrX@593  | 1.85E-10 | 0.007788 |
| 31Mar2011 | 9527  | 564.6   | -13.5437 | 3 R.GTSHFES Splice@chr  | 6.44E-10 | 0.00565  |
| 8Mar2011- | 19606 | 789.42  | 1.472424 | 3 K.FDEK+14 chr5@862    | 1.28E-10 | 0.003074 |
| 29Nov2011 | 15300 | 863.46  | 4.649839 | 3 K.YFKKRRT' chrX@859   | 2.20E-10 | 0.006273 |
| 31May2011 | 2493  | 577.96  | -11.9893 | 3 R.K+14.016 chr1@155   | 1.31E-10 | 0.003873 |
| 31May2011 | 13419 | 687.85  | -0.39861 | 2 R.LPRQLDR Splice@chr  | 1.60E-10 | 0.003536 |
| 31May2011 | 13436 | 687.85  | -0.39861 | 2 R.LPRQLDR Splice@chr  | 1.57E-10 | 0.003266 |
| 31May2011 | 8599  | 687.85  | -0.39861 | 2 R.LPRQLDR Splice@chr  | 1.66E-10 | 0.003861 |
| 29Nov2011 | 27251 | 1114.09 | 0.138112 | 2 _ .KKRSENI chr3@394   | 1.64E-10 | 0.004394 |
| 8Mar2011- | 18571 | 1142.1  | -13.1361 | 2 K.NCAKK+1 chrX@227    | 7.69E-11 | 0.002694 |
| 31May2011 | 10725 | 646.6   | 9.076053 | 4 K.LK+14.01 chr2@131   | 2.54E-10 | 0.005947 |
| 31May2011 | 5456  | 646.85  | 7.776928 | 4 K.LK+14.01 chr2@131   | 9.38E-11 | 0.004819 |
| 31May2011 | 5355  | 646.61  | 24.58098 | 4 K.LK+14.01 chr2@131   | 1.32E-10 | 0.004819 |
| 31May2011 | 5492  | 646.86  | 23.28185 | 4 K.LK+14.01 chr2@131   | 1.84E-10 | 0.004819 |
| 8Mar2011- | 6498  | 622.87  | 27.55551 | 2 R.NCLLSPRi chr4@286   | 8.08E-11 | 0.002556 |
| 8Mar2011- | 6459  | 622.87  | 27.55551 | 2 R.NCLLSPRi chr4@286   | 1.25E-10 | 0.0037   |
| 8Mar2011- | 6273  | 622.87  | 27.55551 | 2 R.NCLLSPRi chr4@286   | 9.63E-11 | 0.001934 |
| 8Mar2011- | 6684  | 622.87  | 27.55551 | 2 R.NCLLSPRi chr4@286   | 4.82E-10 | 0.008651 |

|           |       |         |          |                          |          |          |
|-----------|-------|---------|----------|--------------------------|----------|----------|
| 8Mar2011- | 6633  | 622.87  | 27.55551 | 2 R.NCLLSPR chr4@2860    | 4.80E-10 | 0.008566 |
| 8Mar2011- | 7038  | 622.87  | 27.55551 | 2 R.NCLLSPR chr4@2860    | 2.29E-10 | 0.005346 |
| 31Mar2011 | 10949 | 405.21  | -16.0678 | 3 K.RM+15.9 Splice@chr   | 4.84E-10 | 0.008497 |
| 31Mar2011 | 1773  | 565.79  | -5.89303 | 2 R.LYQDGLA Splice@chr   | 2.32E-12 | 0        |
| 31Mar2011 | 8802  | 670.37  | -9.99044 | 2 R.EVPLPISE chr4@8510   | 5.55E-10 | 0.00762  |
| 29Nov2011 | 8641  | 513.77  | 28.92563 | 4 _ .WHVGGC Splice@chr   | 2.49E-10 | 0.005312 |
| 31Mar2011 | 7014  | 563.28  | -5.57225 | 3 R.DERK+14 chrX@1695    | 1.61E-10 | 0.001974 |
| 31Mar2011 | 7733  | 563.28  | -5.57225 | 3 R.DERK+14 chrX@1695    | 1.26E-10 | 0.002447 |
| 8Mar2011- | 16245 | 756.05  | -1.48171 | 3 R.M+15.99 chr2@7967    | 1.36E-10 | 0.00345  |
| 8Mar2011- | 1898  | 557.31  | -28.1648 | 2 K.RRDLGSP chr3@1376    | 6.18E-11 | 0.001585 |
| 8Mar2011- | 14699 | 982     | 10.88823 | 2 R.TVMVQN Splice@chr    | 1.39E-17 | 0        |
| 8Mar2011- | 12069 | 982     | 10.88823 | 2 R.TVMVQN Splice@chr    | 1.15E-16 | 0        |
| 8Mar2011- | 12056 | 982.5   | 9.178316 | 2 R.TVMVQN Splice@chr    | 8.30E-19 | 0        |
| 8Mar2011- | 14161 | 982     | 10.88823 | 2 R.TVMVQN Splice@chr    | 5.71E-16 | 0        |
| 8Mar2011- | 10996 | 981.99  | 0.684403 | 2 R.TVMVQN Splice@chr    | 1.06E-17 | 0        |
| 8Mar2011- | 13287 | 982     | 10.88823 | 2 R.TVMVQN Splice@chr    | 4.76E-16 | 0        |
| 8Mar2011- | 11308 | 982     | 10.88823 | 2 R.TVMVQN chr4@4659     | 1.99E-19 | 0        |
| 8Mar2011- | 11364 | 982     | 10.88823 | 2 R.TVMVQN Splice@chr    | 5.49E-17 | 0        |
| 8Mar2011- | 14648 | 982     | 10.88823 | 2 R.TVMVQN Splice@chr    | 7.90E-17 | 0        |
| 8Mar2011- | 14702 | 982     | 10.88823 | 2 R.TVMVQN Splice@chr    | 1.31E-16 | 0        |
| 8Mar2011- | 13904 | 982.5   | 9.178316 | 2 R.TVMVQN Splice@chr    | 1.61E-18 | 0        |
| 8Mar2011- | 14219 | 982     | 10.88823 | 2 R.TVMVQN Splice@chr    | 7.22E-15 | 0        |
| 8Mar2011- | 15066 | 982     | 10.88823 | 2 R.TVMVQN Splice@chr    | 1.52E-18 | 0        |
| 8Mar2011- | 15122 | 982     | 10.88823 | 2 R.TVMVQN Splice@chr    | 2.14E-17 | 0        |
| 8Mar2011- | 15090 | 982.5   | 9.178316 | 2 R.TVMVQN Splice@chr    | 9.44E-16 | 0        |
| 8Mar2011- | 15142 | 982     | 10.88823 | 2 R.TVMVQN Splice@chr    | 3.57E-17 | 0        |
| 31May2011 | 3387  | 898.47  | -16.3898 | 2 G.RVCFRG5 chr4@1521    | 1.54E-11 | 3.14E-04 |
| 29Nov2011 | 24735 | 941.51  | -17.4568 | 2 K.K+14.016 chrX@8795   | 1.22E-10 | 0.003534 |
| 31Mar2011 | 3570  | 543.96  | -16.1584 | 3 R.QTSILSQL chr3@8114   | 5.59E-10 | 0.009236 |
| 31May2011 | 10065 | 690.86  | -16.3677 | 2 R.TTLRTHQ chr5@3394    | 9.74E-11 | 0.004575 |
| 31May2011 | 10044 | 690.86  | -16.3677 | 2 R.TTLRTHQ chr5@3394    | 1.86E-10 | 0.007358 |
| 31May2011 | 7835  | 690.86  | -16.3677 | 2 R.TTLRTHQ chr5@3394    | 1.58E-11 | 0        |
| 31Mar2011 | 9769  | 875.48  | -15.7738 | 2 R.RVLSCFG Splice@chr   | 5.25E-10 | 0.008189 |
| 29Nov2011 | 4300  | 506.78  | -24.821  | 2 K.HLVAPAT chrX@7845    | 1.77E-10 | 0.004714 |
| 31May2011 | 8444  | 722.91  | 24.01212 | 2 Q.RCFLQYL chrX@1720    | 2.60E-10 | 0.008655 |
| 31May2011 | 5565  | 722.91  | 24.01212 | 2 Q.RCFLQYL chrX@1720    | 2.43E-10 | 0.005627 |
| 31May2011 | 10368 | 722.91  | 24.01212 | 2 Q.RCFLQYL chrX@1720    | 2.46E-10 | 0.006919 |
| 31Mar2011 | 7581  | 811.94  | -11.5589 | 2 _ .LVIIIEM+ Splice@chr | 5.63E-10 | 0.006642 |
| 29Nov2011 | 23976 | 944.01  | -6.44232 | 2 R.ALM+15. chr4@4266    | 1.09E-10 | 0.002996 |
| 8Mar2011- | 20465 | 968.5   | -27.694  | 4 R.KNRRKN chr3@1198     | 3.23E-10 | 0.006528 |
| 8Mar2011- | 15316 | 1041.54 | -16.0719 | 2 R.ICK+14.0 chr3@1031   | 2.35E-10 | 0.004671 |
| 29Nov2011 | 12410 | 605.89  | 3.73347  | 2 K.K+14.016 chr1@2915   | 1.77E-10 | 0.00384  |
| 29Nov2011 | 3090  | 1061.54 | -26.8992 | 1 R.NNGARPI chr5@3564    | 8.68E-11 | 0.002076 |
| 8Mar2011- | 17808 | 893.97  | -12.6165 | 2 K.NFNRRK+ chr4@1235    | 2.14E-10 | 0.003323 |
| 31May2011 | 3842  | 554.79  | 7.494683 | 2 K.KDFQNL chr1@8606     | 2.56E-10 | 0.006983 |
| 8Mar2011- | 17038 | 965.18  | -27.7682 | 3 R.AGTAASA chr5@5710    | 2.10E-10 | 0.005078 |
| 8Mar2011- | 11761 | 711.9   | 26.336   | 2 K.WYRDGE chr2@9021     | 3.22E-10 | 0.006991 |

|            |       |         |          |                         |          |          |
|------------|-------|---------|----------|-------------------------|----------|----------|
| 31May2011- | 3364  | 571.78  | 15.46773 | 2 K.LERDGC chr3@2388    | 7.76E-11 | 6.95E-04 |
| 8Mar2011-  | 12804 | 895.45  | 17.12809 | 2 R.K+14.016 Splice@chr | 1.07E-10 | 0.003814 |
| 8Mar2011-  | 16021 | 895.45  | 17.12809 | 2 R.K+14.016 Splice@chr | 1.48E-11 | 5.47E-04 |
| 8Mar2011-  | 2602  | 732.36  | 9.847813 | 1 K.NDGGLE chr5@9051    | 1.66E-10 | 0.003251 |
| 8Mar2011-  | 12657 | 863.97  | -25.7933 | 2 K.TRK+14.0 chr4@1474  | 1.17E-11 | 4.17E-04 |
| 31Mar2011- | 4818  | 661.52  | -26.3793 | 5 K.LLWGARI Splice@chr  | 4.38E-10 | 0.007817 |
| 31Mar2011- | 8802  | 748.45  | -19.16   | 2 K.RRWHFV Splice@chr   | 1.60E-10 | 0.002273 |
| 31Mar2011- | 9029  | 943.43  | -21.2848 | 2 R.WK+14.0 chr3@1015   | 3.69E-11 | 6.40E-04 |
| 29Nov2011  | 11254 | 977.61  | 9.937196 | 2 R.K+14.016 chr3@1009  | 1.55E-11 | 0.001326 |
| 29Nov2011  | 3854  | 613.28  | -13.1176 | 2 R.WEDKAE chr3@3425    | 1.37E-10 | 0.003467 |
| 31Mar2011- | 11635 | 993.03  | 4.183785 | 2 K.M+15.99 chr1@1082   | 1.79E-10 | 0.00252  |
| 8Mar2011-  | 14045 | 606.33  | 22.05208 | 2 _QNNNVG chr4@1000     | 1.52E-10 | 0.00452  |
| 29Nov2011  | 14820 | 970.5   | -15.1092 | 2 R.EEQRKN Splice@chr   | 1.26E-10 | 0.002675 |
| 31Mar2011- | 7687  | 664.33  | 7.545233 | 2 R.YIAEDVEI Splice@chr | 2.47E-10 | 0.003811 |
| 31Mar2011- | 3204  | 630.82  | -15.9899 | 2 _MFTKSAT Splice@chr   | 3.57E-10 | 0.005612 |
| 31Mar2011- | 5696  | 746.69  | -14.3839 | 3 Q.EMK+14. chr2@7034   | 2.48E-10 | 0.00877  |
| 8Mar2011-  | 5376  | 831.47  | 18.34982 | 2 R.RWM+15 Splice@chr   | 3.62E-10 | 0.008467 |
| 8Mar2011-  | 4375  | 831.47  | 18.34982 | 2 R.RWM+15 Splice@chr   | 2.42E-10 | 0.005665 |
| 8Mar2011-  | 5178  | 831.47  | 18.34982 | 2 R.RWM+15 Splice@chr   | 1.27E-10 | 0.005137 |
| 31Mar2011- | 10897 | 601.33  | -15.4378 | 5 R.LFPNLCS chr5@2066   | 3.12E-10 | 0.004399 |
| 8Mar2011-  | 15840 | 853.47  | 15.32235 | 2 K.GK+14.01 chrX@1925  | 6.53E-11 | 0.001483 |
| 31May2011- | 3126  | 440.74  | -6.66239 | 2 R.ITFDGISK chr2@5485  | 1.95E-10 | 0.003497 |
| 31May2011- | 2805  | 440.74  | -6.66239 | 2 R.ITFDGISK chr2@5485  | 1.95E-10 | 0.006607 |
| 31May2011- | 5951  | 686.38  | -11.2548 | 3 K.NEELVTT chr4@9802   | 5.29E-11 | 0.002558 |
| 31May2011- | 5002  | 686.38  | -11.2548 | 3 K.NEELVTT chr4@9802   | 1.11E-11 | 0        |
| 31May2011- | 4959  | 686.38  | -11.2548 | 3 K.NEELVTT chr4@9802   | 2.05E-10 | 0.003914 |
| 31Mar2011- | 1484  | 402.73  | -26.1319 | 2 R.AIPHAAP chr5@7268   | 6.64E-10 | 0.007957 |
| 31Mar2011- | 14898 | 988.58  | 5.508287 | 1 K.RTWRRG Splice@chr   | 2.23E-10 | 0.005591 |
| 29Nov2011  | 16071 | 802.9   | 4.871315 | 2 R.DQENLE Splice@chr   | 4.36E-10 | 0.009876 |
| 31Mar2011- | 11670 | 1167.94 | -24.5364 | 3 _RDDSK+1 chrX@1655    | 5.66E-11 | 0.001211 |
| 31Mar2011- | 13371 | 1041.05 | 26.8045  | 2 K.CVLSRLC chr1@8426   | 1.19E-10 | 0.002141 |
| 31Mar2011- | 8862  | 787.88  | 24.51171 | 2 K.M+15.99 Splice@chr  | 2.08E-10 | 0.003499 |
| 8Mar2011-  | 3126  | 584.39  | -25.7045 | 2 K.KLTLLIK+ chr1@7702  | 1.38E-10 | 0.003168 |
| 8Mar2011-  | 2294  | 584.39  | -25.7045 | 2 K.KLTLLIK+ chr1@7702  | 4.48E-10 | 0.009416 |
| 8Mar2011-  | 18401 | 999.53  | -20.333  | 2 K.NKVFDK chr5@1895    | 3.31E-10 | 0.008863 |
| 31Mar2011- | 4927  | 778.41  | -6.83653 | 1 K.GHIGTHR chr4@2942   | 1.40E-10 | 0.001572 |
| 8Mar2011-  | 15616 | 904.95  | -3.17348 | 2 R.NGLYQR chr5@3957    | 8.01E-11 | 0.001493 |
| 29Nov2011  | 10348 | 818.93  | -18.2547 | 2 K.SERM+15 chrX@5475   | 2.56E-10 | 0.006479 |
| 29Nov2011  | 8869  | 818.93  | -18.2547 | 2 K.SERM+15 chrX@5475   | 2.09E-11 | 0.001326 |
| 8Mar2011-  | 17214 | 1042.04 | 0.820813 | 2 K.FMHKNSI chr2@1172   | 3.23E-10 | 0.006991 |
| 31Mar2011- | 12247 | 1078.22 | 27.30126 | 3 R.QLADNM chr4@6334    | 5.20E-10 | 0.005769 |
| 31Mar2011- | 6145  | 687.38  | -3.91265 | 2 K.NNPIKVK chr1@1075   | 5.84E-10 | 0.009186 |
| 31Mar2011- | 7450  | 814.44  | -7.35329 | 2 V.TGIGTLQ chr4@7198   | 3.32E-10 | 0.009096 |
| 31Mar2011- | 8434  | 814.44  | -7.35329 | 2 V.TGIGTLQ chr4@7198   | 5.12E-10 | 0.007788 |
| 29Nov2011  | 17078 | 990.52  | 1.175321 | 1 K.VGDVTEL chrX@6728   | 3.59E-10 | 0.008564 |
| 8Mar2011-  | 12374 | 511.63  | 3.665629 | 3 R.EIPVSLVC Splice@chr | 3.04E-10 | 0.007041 |
| 8Mar2011-  | 12492 | 511.63  | 3.665629 | 3 R.EIPVSLVC Splice@chr | 3.07E-10 | 0.006864 |

|           |       |         |          |                         |          |          |
|-----------|-------|---------|----------|-------------------------|----------|----------|
| 31May2011 | 5850  | 525.78  | 7.443761 | 2 R.RERGSN chr2@125     | 2.30E-11 | 8.15E-04 |
| 31Mar2011 | 7891  | 786.92  | -9.37986 | 4 N.FPKTIFVI chr5@733   | 1.99E-10 | 0.004936 |
| 31May2011 | 2195  | 580.33  | -27.3216 | 3 K.PEQKPEP chr1@745    | 5.40E-10 | 0.00639  |
| 29Nov2011 | 17207 | 786.09  | 6.767537 | 3 R.NALLMN chr2@725     | 9.08E-11 | 0.003523 |
| 8Mar2011- | 3038  | 462.24  | -18.9351 | 3 _QAENVDI chr3@929     | 3.19E-10 | 0.009887 |
| 8Mar2011- | 16449 | 673.71  | -19.9391 | 3 _CGTVFSK chrX@116     | 2.90E-10 | 0.007803 |
| 8Mar2011- | 2688  | 598.36  | 20.84437 | 2 K.MKNSGK chr5@200     | 1.17E-10 | 0.003273 |
| 31Mar2011 | 6473  | 673.84  | 1.269995 | 2 R.EVSENSK chr1@776    | 2.31E-10 | 0.002559 |
| 31May2011 | 7834  | 851.68  | -13.9047 | 4 _TCLRTDV Splice@chr   | 1.96E-10 | 0.006607 |
| 31Mar2011 | 11236 | 1017.5  | -10.0274 | 2 K.SVCLNVC chrX@425    | 1.23E-10 | 0.001468 |
| 31Mar2011 | 11552 | 1017.5  | -10.0274 | 2 K.SVCLNVC chrX@425    | 2.01E-10 | 0.003667 |
| 29Nov2011 | 17871 | 1346.66 | 2.902876 | 1 _SLCSM+1 Splice@chr   | 9.00E-11 | 0.002076 |
| 31May2011 | 7566  | 564.81  | 18.83696 | 2 K.YKM+15. Splice@chr  | 2.71E-10 | 0.004907 |
| 31May2011 | 9882  | 564.81  | 18.83696 | 2 K.YKM+15. Splice@chr  | 4.56E-11 | 0.001992 |
| 29Nov2011 | 12343 | 1162.65 | 3.677963 | 2 K.KNEK+14 chr4@144    | 7.77E-11 | 0.004238 |
| 31May2011 | 7231  | 676.37  | -2.77146 | 3 R.K+14.016 Splice@chr | 4.07E-10 | 0.008397 |
| 29Nov2011 | 11323 | 832.44  | -12.0237 | 4 _M+15.99 Splice@chr   | 1.23E-10 | 0.005452 |
| 8Mar2011- | 6656  | 570.3   | -25.7303 | 2 _FFKSPVS/ Splice@chr  | 3.42E-10 | 0.008657 |
| 29Nov2011 | 5978  | 435.26  | -10.2665 | 3 K.NLLKTV/ chr1@430    | 7.92E-11 | 0.002307 |
| 8Mar2011- | 17061 | 1169.14 | 19.12394 | 2 K.NSNFPLK chr2@140    | 2.12E-10 | 0.00578  |
| 31Mar2011 | 6474  | 675.36  | -28.8463 | 2 K.EIWLSGS chrX@399    | 1.08E-11 | 0        |
| 31Mar2011 | 6550  | 465.01  | 9.378587 | 4 R.IGDGFLEI chr2@107   | 3.52E-10 | 0.004969 |
| 8Mar2011- | 18871 | 619.35  | -11.2106 | 2 R.IEMFSLK- chr3@933   | 2.46E-10 | 0.006418 |
| 8Mar2011- | 16945 | 768.4   | -7.55584 | 2 K.MVM+15 chrX@507     | 2.55E-10 | 0.005027 |
| 8Mar2011- | 7730  | 494.8   | 13.2259  | 2 K.LSEVSRV/ chr3@220   | 1.28E-11 | 5.96E-04 |
| 29Nov2011 | 19798 | 855.96  | -13.1064 | 2 R.RKEVGDK Splice@chr  | 1.23E-10 | 0.003534 |
| 29Nov2011 | 4049  | 1200.69 | -8.9089  | 1 _KTRTLPLDI Splice@chr | 1.15E-10 | 0.003177 |
| 31Mar2011 | 11052 | 927.5   | -27.4044 | 2 R.K+14.016 chr5@250   | 3.11E-10 | 0.003947 |
| 31Mar2011 | 2901  | 543.96  | 24.11071 | 3 R.YPTRSTA Splice@chr  | 3.27E-10 | 0.008457 |
| 31Mar2011 | 3697  | 543.96  | 24.11071 | 3 R.YPTRSTA Splice@chr  | 8.29E-11 | 0.003169 |
| 31Mar2011 | 3282  | 543.96  | 24.11071 | 3 R.YPTRSTA Splice@chr  | 1.96E-10 | 0.006137 |
| 31Mar2011 | 8371  | 812.93  | -5.00079 | 2 K.PQKFEFSI chr3@112   | 5.58E-10 | 0.007521 |
| 8Mar2011- | 16142 | 959.01  | 26.36007 | 2 R.WK+14.0 chr4@843    | 3.99E-10 | 0.008103 |
| 8Mar2011- | 12117 | 766.58  | -11.0338 | 5 K.DQSMEI\ Splice@chr  | 1.58E-10 | 0.004855 |
| 31May2011 | 5111  | 585.63  | 15.91434 | 3 _DLELNIEI chr4@147    | 7.91E-11 | 0.003575 |
| 31Mar2011 | 2349  | 477.6   | -11.8673 | 3 K.LLK+14.0 chr2@683   | 6.47E-11 | 2.66E-04 |
| 8Mar2011- | 16829 | 675.38  | -7.47071 | 2 R.IENFNITL chr4@102   | 1.42E-10 | 0.00316  |
| 31Mar2011 | 10285 | 726.42  | 14.91634 | 1 _GVHAVSF chr5@170     | 4.46E-10 | 0.006764 |
| 31Mar2011 | 5186  | 686.38  | -16.4747 | 2 K.LSAIFPAK Splice@chr | 5.51E-10 | 0.00629  |
| 29Nov2011 | 23601 | 916.98  | -10.9136 | 4 K.FLVNCLIS chr3@121   | 4.77E-10 | 0.009945 |
| 29Nov2011 | 9121  | 547.79  | 13.24198 | 2 K.NLPFHSI chr1@888    | 2.93E-10 | 0.007261 |
| 31Mar2011 | 8824  | 705.83  | -25.5187 | 2 K.CFRSSGA chrX@179    | 3.35E-10 | 0.005186 |
| 8Mar2011- | 6908  | 410.23  | -25.2801 | 2 _FGLIGAGI chr4@375    | 1.10E-10 | 0.003185 |
| 29Nov2011 | 25984 | 1009.52 | -2.75396 | 2 R.RLLRRM+ Splice@chr  | 2.10E-10 | 0.005801 |
| 31Mar2011 | 11809 | 1126.22 | 15.35628 | 3 R.SCSTCSM Splice@chr  | 5.67E-10 | 0.007875 |
| 29Nov2011 | 18870 | 1181.65 | -3.10179 | 2 R.M+15.99 chr2@194    | 2.65E-10 | 0.008789 |
| 29Nov2011 | 20770 | 1181.65 | -3.10179 | 2 R.M+15.99 chr2@194    | 1.44E-10 | 0.003224 |

|            |       |         |          |                         |          |          |
|------------|-------|---------|----------|-------------------------|----------|----------|
| 31May2011- | 8836  | 1000.03 | -10.6041 | 2 H.FRTVPTL chr1@1229   | 1.18E-10 | 0.004624 |
| 31May2011- | 8922  | 1000.03 | -10.6041 | 2 H.FRTVPTL chr1@1229   | 2.10E-10 | 0.006998 |
| 31May2011- | 8014  | 1000.04 | -0.64074 | 2 H.FRTVPTL chr1@1229   | 3.38E-10 | 0.006741 |
| 31May2011- | 9258  | 1000.03 | -10.6041 | 2 H.FRTVPTL chr1@1229   | 2.74E-10 | 0.008641 |
| 31May2011- | 9156  | 1000.03 | -10.6041 | 2 H.FRTVPTL chr1@1229   | 1.99E-10 | 0.005186 |
| 29Nov2011  | 10880 | 977.62  | 21.23013 | 2 _SK+14.01 chr4@1686   | 2.19E-10 | 0.009579 |
| 29Nov2011  | 22379 | 959.51  | -11.1041 | 3 G.DEALKFL chr5@1451   | 3.10E-10 | 0.005938 |
| 29Nov2011  | 12073 | 531.05  | -12.5514 | 4 R.NQQLTSL Splice@chr  | 2.74E-10 | 0.006108 |
| 29Nov2011  | 2049  | 705.38  | 27.64271 | 1 K.EAVAGM chr1@7750    | 2.61E-10 | 0.007173 |
| 31Mar2011- | 10315 | 1021.5  | 17.50425 | 2 K.NDGYIKK chr2@4712   | 1.55E-10 | 0.002378 |
| 29Nov2011  | 3658  | 605.3   | -1.21203 | 1 R.STGGGAf chr5@4646   | 9.58E-11 | 0.002608 |
| 8Mar2011-  | 18775 | 1053.06 | -0.55039 | 2 R.FFNLFVLI chr5@8668  | 5.43E-11 | 0.001471 |
| 29Nov2011  | 16116 | 877.5   | -9.09136 | 2 I.YDTILK+1 chr1@8252  | 4.51E-11 | 0.001361 |
| 31May2011- | 9484  | 462.24  | -2.41518 | 4 _SHKKWPI chr1@8046    | 1.88E-10 | 0.00409  |
| 8Mar2011-  | 2427  | 544.8   | 7.520127 | 2 K.KDLEVEV Splice@chr  | 3.63E-10 | 0.009332 |
| 8Mar2011-  | 1933  | 544.8   | 7.520127 | 2 K.KDLEVEV chr4@7571   | 3.09E-10 | 0.006663 |
| 8Mar2011-  | 15921 | 578.64  | 16.03655 | 3 K.LYAALDY chr5@1323   | 4.82E-10 | 0.009476 |
| 29Nov2011  | 21077 | 839.46  | 22.98239 | 2 _TK+14.01 Splice@chr  | 3.01E-10 | 0.007646 |
| 31Mar2011- | 4211  | 665.88  | -11.6197 | 2 K.LIYK+14.( chr2@3030 | 1.45E-10 | 0.001693 |
| 31Mar2011- | 11453 | 1074.57 | -27.4995 | 2 R.SKYAVHL chr5@2958   | 5.41E-10 | 0.005949 |
| 31May2011- | 4998  | 1007.05 | -14.5968 | 2 R.VAPEEHP Splice@chr  | 7.92E-11 | 0.003311 |
| 29Nov2011  | 15345 | 839.44  | -17.5165 | 2 K.CWNLTRI chr1@5357   | 4.77E-11 | 0.001141 |
| 29Nov2011  | 9761  | 825.46  | 25.07674 | 2 K.CRELPTF Splice@chr  | 1.45E-10 | 0.005595 |
| 29Nov2011  | 1980  | 528.81  | -14.8017 | 2 K.LARKNAC chrX@4879   | 4.41E-10 | 0.00917  |
| 29Nov2011  | 1780  | 528.81  | -14.8017 | 2 K.LARKNAC chrX@4879   | 4.33E-10 | 0.009536 |
| 29Nov2011  | 16227 | 739.07  | 15.87798 | 3 R.AVVNMI Splice@chr   | 6.99E-12 | 3.54E-04 |
| 29Nov2011  | 13570 | 739.07  | 15.87798 | 3 R.AVVNMI Splice@chr   | 2.18E-10 | 0.00631  |
| 29Nov2011  | 13116 | 739.41  | 23.40445 | 3 R.AVVNMI Splice@chr   | 3.80E-11 | 8.63E-04 |
| 8Mar2011-  | 11695 | 784.5   | -16.4071 | 2 K.KLKRSKPI chrX@1081  | 7.71E-11 | 0.00319  |
| 31Mar2011- | 4506  | 538.96  | -10.5137 | 3 _GEKQNK chrX@1079     | 3.82E-10 | 0.005919 |
| 8Mar2011-  | 16611 | 879.14  | -23.3383 | 3 K.RSMTQR chr5@8252    | 3.52E-10 | 0.008497 |
| 8Mar2011-  | 15973 | 879.14  | -23.3383 | 3 K.RSMTQR chr5@8252    | 2.01E-10 | 0.005573 |
| 8Mar2011-  | 12445 | 879.14  | -23.3383 | 3 K.RSMTQR chr5@8252    | 2.46E-10 | 0.004655 |
| 8Mar2011-  | 17028 | 879.14  | -23.3383 | 3 K.RSMTQR chr5@8252    | 1.66E-10 | 0.003905 |
| 8Mar2011-  | 11034 | 876.44  | -29.8203 | 2 K.IWK+14.( chrX@1259  | 4.38E-10 | 0.009171 |
| 31Mar2011- | 1131  | 408.88  | -17.5205 | 3 K.WVFSSIL chr4@1981   | 2.53E-10 | 0.009151 |
| 29Nov2011  | 7810  | 703.85  | -10.0734 | 2 _QCTREGE Splice@chr   | 2.47E-12 | 6.67E-04 |
| 8Mar2011-  | 7261  | 452.28  | 24.21057 | 2 R.SALAFGLI chr1@2428  | 3.32E-10 | 0.008004 |
| 8Mar2011-  | 15485 | 737.91  | -11.6435 | 2 R.YNFLIFRP chr1@5392  | 5.17E-11 | 0.001376 |
| 8Mar2011-  | 6842  | 665.39  | -8.68635 | 2 K.SHRGIVQ chr4@1544   | 5.26E-11 | 0.001076 |
| 31May2011- | 6584  | 489.28  | -22.3888 | 3 K.EK+14.01 chr2@1135  | 3.40E-10 | 0.007933 |
| 29Nov2011  | 4073  | 960.5   | -0.19084 | 1 K.ENQEIVT chr5@4132   | 1.14E-10 | 0.003061 |
| 29Nov2011  | 5830  | 960.5   | -0.19084 | 1 K.ENQEIVT chr5@4132   | 3.44E-10 | 0.006551 |
| 29Nov2011  | 3668  | 960.5   | -0.19084 | 1 K.ENQEIVT chr5@4132   | 1.33E-10 | 0.005804 |
| 8Mar2011-  | 1928  | 530.27  | -15.0684 | 3 R.KDDSEQE chr5@9353   | 3.70E-10 | 0.005788 |
| 31May2011- | 3749  | 480.57  | -4.03161 | 3 K.INEAWG chr4@7612    | 4.08E-10 | 0.007564 |
| 31May2011- | 5596  | 819.42  | 10.36638 | 2 K.FVEHK+1 chr1@5263   | 4.02E-10 | 0.007997 |

|           |       |         |          |                         |          |          |
|-----------|-------|---------|----------|-------------------------|----------|----------|
| 29Nov2011 | 837   | 688.35  | -20.0681 | 2 K.NCQKIFF\ chr5@1908  | 1.91E-10 | 0.007384 |
| 8Mar2011- | 3285  | 620.79  | 18.21884 | 2 R.VFWESGI chr1@6370   | 1.25E-10 | 0.003078 |
| 31Mar2011 | 8233  | 807.48  | -12.2287 | 2 K.KKNKNC\ chr5@7142   | 7.41E-10 | 0.00912  |
| 31Mar2011 | 7640  | 785.91  | -16.3296 | 2 R.KMNVQS chr5@9097    | 2.70E-10 | 0.004132 |
| 29Nov2011 | 15328 | 1090.5  | -25.0796 | 2 R.WFRSEN\ Splice@chr  | 2.90E-10 | 0.007184 |
| 29Nov2011 | 2760  | 719.38  | -26.8822 | 1 R.SRAAASR chrX@1681   | 4.42E-10 | 0.009961 |
| 29Nov2011 | 2565  | 719.38  | -26.8822 | 1 R.SRAAASR chrX@1681   | 3.38E-10 | 0.008725 |
| 29Nov2011 | 2881  | 718.38  | -22.2058 | 1 R.SRAAASR chrX@1681   | 4.67E-10 | 0.009506 |
| 29Nov2011 | 14727 | 1151.08 | -7.29942 | 2 R.FEKRSNN chr5@2027   | 3.38E-10 | 0.00826  |
| 8Mar2011- | 14942 | 630.32  | 4.655402 | 4 R.YIGVGGV chr4@1600   | 5.06E-10 | 0.00989  |
| 29Nov2011 | 2802  | 1046.56 | -24.2838 | 1 R.LIAPMKS chr2@7367   | 1.62E-10 | 0.004146 |
| 8Mar2011- | 2200  | 464.21  | -2.83375 | 2 _RSSSCSF chr2@1127    | 4.04E-10 | 0.006561 |
| 29Nov2011 | 12314 | 930.56  | 13.63332 | 2 R.RPMIM+ chrX@7732    | 8.06E-11 | 0.003526 |
| 8Mar2011- | 15807 | 787.95  | 5.99413  | 4 L.AVVNLLH chrX@4218   | 2.64E-10 | 0.004287 |
| 31Mar2011 | 4786  | 540.29  | 11.88389 | 2 K.KEEGMK\ chrX@1436   | 1.14E-10 | 0.004596 |
| 29Nov2011 | 20289 | 925.51  | 26.25884 | 2 K.M+15.99 Splice@chr  | 3.53E-10 | 0.00902  |
| 8Mar2011- | 18610 | 633.82  | 17.52169 | 2 R.RSQCSCR chr4@3645   | 3.88E-10 | 0.008642 |
| 31Mar2011 | 7990  | 930.81  | -24.6812 | 3 _SIRPTRQ\ Splice@chr  | 7.02E-11 | 9.55E-04 |
| 8Mar2011- | 8194  | 554.3   | -18.9734 | 2 R.MRSKVM chrX@1502    | 1.06E-11 | 2.78E-04 |
| 8Mar2011- | 7303  | 480.26  | -24.22   | 2 R.VLTGDLA chr2@8204   | 4.39E-11 | 0.001071 |
| 8Mar2011- | 1768  | 608.29  | -12.2615 | 2 R.RAFGQNI chrX@9020   | 3.04E-10 | 0.007517 |
| 8Mar2011- | 20308 | 927.95  | 12.73033 | 3 K.LKKLKILA chrX@1265  | 4.18E-10 | 0.007913 |
| 29Nov2011 | 12110 | 925.49  | -1.67253 | 3 K.PTVRTTT chr1@1045   | 1.49E-10 | 0.005595 |
| 31May2011 | 2242  | 601.29  | 24.70823 | 2 R.NQYCGD chr5@6275    | 2.58E-10 | 0.00885  |
| 29Nov2011 | 24973 | 940.5   | -10.3295 | 2 K.ENRRFSA chr5@2815   | 2.38E-10 | 0.006439 |
| 29Nov2011 | 15827 | 1387.27 | 0.110886 | 2 K.YKWIWN chr2@1381    | 3.09E-10 | 0.005703 |
| 8Mar2011- | 14866 | 607.83  | 26.25249 | 2 K.KFQTSSK chr3@1335   | 1.89E-10 | 0.004745 |
| 31Mar2011 | 10507 | 1050.06 | 18.42453 | 2 R.YFFRHLQ chr2@1374   | 4.41E-10 | 0.009844 |
| 31May2011 | 9168  | 766.77  | 20.654   | 3 K.FQKSLIS chr2@2992   | 2.34E-10 | 0.005761 |
| 8Mar2011- | 5589  | 634.87  | 13.67349 | 2 R.IQKCHTLI Splice@chr | 2.38E-10 | 0.006307 |
| 8Mar2011- | 7789  | 634.87  | 13.67349 | 2 R.IQKCHTLI Splice@chr | 4.32E-10 | 0.009441 |
| 8Mar2011- | 7584  | 634.87  | 13.67349 | 2 R.IQKCHTLI Splice@chr | 8.50E-11 | 0.003844 |
| 31May2011 | 10058 | 655.85  | -8.29526 | 2 _SEIIADIK\ Splice@chr | 3.03E-10 | 0.009266 |
| 29Nov2011 | 22089 | 895.5   | -2.90038 | 2 K.CAKNVK+ chr3@1195   | 4.19E-11 | 0.001286 |
| 29Nov2011 | 12980 | 592.3   | -20.6891 | 3 F.SYSLIISTS chr4@8095 | 2.71E-10 | 0.006178 |
| 29Nov2011 | 27019 | 915     | 13.06374 | 2 _NKK+14.( chr4@1051   | 4.07E-10 | 0.009563 |
| 8Mar2011- | 22696 | 954.52  | 10.19081 | 1 K.NVHYRHI chr4@8237   | 3.22E-10 | 0.005041 |
| 8Mar2011- | 1303  | 410.24  | 4.026946 | 2 K.KNKSGAS Splice@chr  | 1.97E-10 | 0.005436 |
| 31Mar2011 | 90    | 792.38  | 7.712632 | 1 R.ETGETQK chr4@4395   | 2.15E-10 | 0.006581 |
| 8Mar2011- | 11683 | 1064.24 | -8.34283 | 3 _EIEMFRF\ chr5@1317   | 1.85E-10 | 0.007788 |
| 31May2011 | 10721 | 921.45  | -4.34453 | 2 R.PQTLKVD chr2@9407   | 4.28E-10 | 0.008485 |
| 8Mar2011- | 14217 | 819.44  | -9.51283 | 2 _DLSSLK+1 chr2@1251   | 3.09E-10 | 0.006134 |
| 8Mar2011- | 12785 | 1120.52 | -25.934  | 2 V.YCCRRRA chrX@1414   | 4.43E-10 | 0.009171 |
| 8Mar2011- | 3478  | 458.76  | -10.2002 | 2 K.ISISNGII chr1@2135  | 3.64E-10 | 0.009332 |
| 8Mar2011- | 897   | 589.33  | -13.029  | 2 K.KKLANHF chr3@1015   | 3.80E-10 | 0.007739 |
| 8Mar2011- | 848   | 589.33  | -13.029  | 2 K.KKLANHF chr3@1015   | 1.27E-10 | 0.003391 |
| 29Nov2011 | 9229  | 667.34  | -24.1815 | 2 K.TDVSYSFI chr4@1004  | 5.82E-11 | 0.002882 |

|           |       |         |          |                         |          |          |
|-----------|-------|---------|----------|-------------------------|----------|----------|
| 31May2011 | 9765  | 921.9   | 15.95004 | 2 R.CYDESEH chr4@7080   | 2.10E-10 | 0.003497 |
| 31May2011 | 8891  | 921.9   | 15.95004 | 2 R.CYDESEH chr4@7080   | 2.41E-10 | 0.007757 |
| 31May2011 | 13580 | 921.9   | 15.95004 | 2 R.CYDESEH chr4@7080   | 2.68E-10 | 0.008081 |
| 31May2011 | 8763  | 844.44  | 29.38114 | 2 K.NNQNNY chr2@2721    | 2.25E-10 | 0.005133 |
| 29Nov2011 | 11659 | 532.28  | -22.5169 | 2 R.ARHAQD chr2@1248    | 4.41E-11 | 0.001448 |
| 31Mar2011 | 2719  | 583.85  | -4.2935  | 2 K.ILYKIKTCI chrX@1431 | 2.68E-10 | 0.003109 |
| 8Mar2011- | 3138  | 879.47  | -27.3047 | 1 _YEVENVKK chr2@1419   | 4.05E-10 | 0.008537 |
| 31Mar2011 | 4418  | 497.04  | 26.80879 | 4 R.KRNAISN chr2@5640   | 5.91E-11 | 0.001008 |
| 31Mar2011 | 4359  | 497.04  | 26.80879 | 4 R.KRNAISN chr2@5640   | 4.57E-10 | 0.008482 |
| 31Mar2011 | 10123 | 1017    | -24.9115 | 2 _TMKIRAT chrX@8311    | 3.49E-10 | 0.005385 |
| 29Nov2011 | 14693 | 1074.51 | -28.541  | 2 _EHSK+14 chrX@1355    | 2.19E-10 | 0.004007 |
| 8Mar2011- | 18332 | 810.19  | -15.7496 | 4 K.RGNGWT chrX@1866    | 3.25E-10 | 0.007087 |
| 8Mar2011- | 17199 | 1104.58 | -26.9727 | 2 R.K+14.016 chrX@1681  | 3.93E-10 | 0.008452 |
| 8Mar2011- | 4019  | 441.48  | 17.08969 | 4 R.TYFSNSSI chr4@1086  | 5.00E-10 | 0.00996  |
| 8Mar2011- | 2959  | 501.27  | -13.9203 | 2 K.LANDKPC chr5@9046   | 2.69E-10 | 0.007244 |
| 31May2011 | 5633  | 990.02  | -14.2556 | 2 R.LGAVAKS chr4@2595   | 3.50E-10 | 0.009524 |
| 31May2011 | 10066 | 893.97  | -1.84548 | 2 K.FSK+14.0 Splice@chr | 4.00E-10 | 0.009024 |
| 29Nov2011 | 5581  | 448.94  | -0.04386 | 3 _LKKDVNK Splice@chr   | 1.14E-10 | 0.005276 |
| 31May2011 | 3638  | 846.88  | -21.1414 | 2 R.AM+15.9 chr5@1527   | 9.28E-11 | 0.003807 |
| 31May2011 | 2426  | 846.89  | -9.30799 | 2 R.AM+15.9 chr5@1527   | 1.26E-10 | 0.00275  |
| 31May2011 | 5278  | 846.88  | -21.1414 | 2 R.AM+15.9 chr5@1527   | 1.45E-10 | 0.004977 |
| 31Mar2011 | 15841 | 1004.6  | 27.03251 | 1 R.RVRCRTR chrX@1476   | 4.87E-10 | 0.008606 |
| 31Mar2011 | 5823  | 641.32  | -0.95321 | 4 R.SNEMSV chrX@1295    | 1.80E-10 | 0.003127 |
| 29Nov2011 | 6706  | 655.42  | 10.81911 | 2 K.RSPIGNV chr5@5747   | 7.28E-11 | 0.004475 |
| 29Nov2011 | 9587  | 963.53  | -11.3506 | 1 K.SSLTMRIF Splice@chr | 3.63E-10 | 0.00863  |
| 31May2011 | 5407  | 1143.07 | -19.006  | 2 K.TAYKCLQ chr3@4905   | 2.40E-10 | 0.007179 |
| 8Mar2011- | 11322 | 1076.03 | -14.9662 | 2 _NEKKCEG Splice@chr   | 2.01E-11 | 7.99E-04 |
| 31Mar2011 | 880   | 505.28  | 28.1416  | 3 R.HFGYGLA chr1@9951   | 3.54E-10 | 0.004545 |
| 31May2011 | 4539  | 524.81  | 13.12366 | 2 R.QIFVGNT chr3@1010   | 2.60E-10 | 0.00477  |
| 8Mar2011- | 2180  | 639.81  | -25.128  | 2 K.AEFDEQK Splice@chr  | 3.16E-10 | 0.008153 |
| 8Mar2011- | 2804  | 658.8   | -10.3921 | 2 H.QNMDPT chr4@1261    | 2.90E-10 | 0.005118 |
| 8Mar2011- | 3158  | 658.8   | -10.3921 | 2 H.QNMDPT chr4@1261    | 3.35E-10 | 0.008384 |
| 31Mar2011 | 7684  | 801.94  | -27.4108 | 2 R.FPGSAKA chrX@6087   | 4.39E-10 | 0.008612 |
| 31May2011 | 6251  | 831.76  | -24.1955 | 3 L.KFLNVEE chr5@1112   | 2.79E-10 | 0.009513 |
| 8Mar2011- | 8737  | 504.32  | -4.30496 | 2 R.PKTPPLAI chr4@1586  | 1.43E-10 | 0.003726 |
| 31Mar2011 | 7124  | 834.96  | -12.9972 | 2 K.IQLMVKS Splice@chr  | 2.03E-10 | 0.003801 |
| 31May2011 | 9960  | 636.02  | 0.256311 | 3 R.NLALEGG chr1@6991   | 2.35E-10 | 0.005133 |
| 8Mar2011- | 19093 | 1167.59 | -0.62784 | 3 K.EREHHRK chr1@3649   | 2.12E-10 | 0.006743 |
| 29Nov2011 | 25584 | 1043.9  | -10.4563 | 3 _YSNLIKLD chr5@7216   | 1.53E-10 | 0.00416  |
| 31May2011 | 7176  | 624.35  | 6.32243  | 2 K.IQLRGGH chrX@8894   | 2.80E-10 | 0.007214 |
| 31Mar2011 | 3200  | 416.23  | 23.81359 | 2 K.EAVDGGI chr4@5388   | 4.37E-10 | 0.005897 |
| 29Nov2011 | 27784 | 878.44  | -22.9317 | 2 R.SVYIYHN chr5@5900   | 5.99E-11 | 0.001881 |
| 29Nov2011 | 13363 | 998.02  | -7.63828 | 4 R.RQTTFFG chr5@1926   | 9.84E-11 | 0.004612 |
| 8Mar2011- | 1158  | 658.39  | 8.317745 | 2 R.RRGNRKI chr3@6871   | 2.13E-10 | 0.007919 |
| 8Mar2011- | 10267 | 542.3   | -18.5397 | 3 K.IVDSL VKI chr1@5918 | 2.67E-10 | 0.00741  |
| 31Mar2011 | 9225  | 795.39  | -9.18597 | 2 K.QFEINFQ chr4@9252   | 2.22E-10 | 0.004734 |
| 31Mar2011 | 9759  | 622.84  | -19.3359 | 2 R.GKISGSS chr5@1666   | 3.06E-10 | 0.003608 |

|           |       |         |          |                          |          |          |
|-----------|-------|---------|----------|--------------------------|----------|----------|
| 29Nov2011 | 20597 | 1201.61 | 14.97891 | 2 _ .WDFMEF Splice@chr   | 1.98E-10 | 0.005069 |
| 8Mar2011- | 18602 | 941.5   | 23.73423 | 2 F.FLNCNNV Splice@chr   | 2.25E-10 | 0.004863 |
| 31Mar2011 | 6218  | 638.32  | -9.84327 | 4 P.SLKMKFT chrX@9225    | 3.74E-10 | 0.007231 |
| 31Mar2011 | 12001 | 893.97  | -0.58011 | 2 K.ICK+14.0 chr5@4958   | 8.30E-12 | 1.87E-04 |
| 29Nov2011 | 5428  | 621.85  | -0.53941 | 2 K.LTNKLNT chr5@2015    | 6.00E-11 | 0.003152 |
| 29Nov2011 | 1684  | 418.95  | 0.330066 | 4 R.SIDNHLTI chr1@1581   | 3.13E-10 | 0.00801  |
| 29Nov2011 | 6939  | 662.69  | -9.93527 | 3 K.NEYYANC chr5@4291    | 2.37E-11 | 0.001494 |
| 29Nov2011 | 7940  | 662.69  | -9.93527 | 3 K.NEYYANC chr5@4291    | 2.38E-10 | 0.008683 |
| 8Mar2011- | 10898 | 600.29  | 21.2865  | 2 V.M+15.99 chr1@1176    | 1.93E-10 | 0.008258 |
| 8Mar2011- | 11057 | 600.28  | 4.685067 | 2 V.M+15.99 chr1@1176    | 1.70E-10 | 0.003927 |
| 31Mar2011 | 9490  | 782.91  | -17.7683 | 2 K.AKFSVFFI chr1@1385   | 6.52E-10 | 0.008235 |
| 31May2011 | 13068 | 978.57  | 25.51999 | 2 K.KKM+15. chrX@6674    | 2.74E-10 | 0.006757 |
| 29Nov2011 | 12246 | 675.39  | 15.29563 | 2 R.TIMWRN chr2@1222     | 4.23E-10 | 0.008837 |
| 8Mar2011- | 7376  | 665.38  | 15.21764 | 2 K.NLK+14.C chr2@1086   | 4.12E-10 | 0.008537 |
| 29Nov2011 | 12925 | 1300.66 | -11.1457 | 3 K.TGDGM+ Splice@chr    | 5.20E-12 | 4.68E-04 |
| 31Mar2011 | 9489  | 870.49  | 23.70701 | 2 F.LLSLINWI Splice@chr  | 3.48E-10 | 0.005896 |
| 31May2011 | 4047  | 818.41  | -14.0377 | 2 K.KPM+15. Splice@chr   | 2.55E-10 | 0.004196 |
| 8Mar2011- | 2940  | 479.26  | -16.029  | 5 R.RK+14.01 chr2@2865   | 1.08E-10 | 0.003226 |
| 31Mar2011 | 6576  | 747.65  | -24.6739 | 4 _ .K+14.016 Splice@chr | 6.48E-10 | 0.007747 |
| 29Nov2011 | 3447  | 706.38  | 22.99185 | 2 K.QAEYISNI chr3@6228   | 9.10E-11 | 0.001486 |
| 29Nov2011 | 11622 | 785.73  | -20.4115 | 3 K.WRMTFL Splice@chr    | 1.25E-10 | 0.004812 |
| 8Mar2011- | 18148 | 958.15  | 2.550731 | 3 _ .SSRLWNC chr1@7075   | 1.61E-10 | 0.004447 |
| 8Mar2011- | 10222 | 874.94  | -2.6539  | 2 I.WTNM+1 Splice@chr    | 2.82E-10 | 0.008237 |
| 29Nov2011 | 21669 | 1017.04 | 16.58017 | 2 K.NIQKVCK chr4@1575    | 2.53E-10 | 0.006302 |
| 29Nov2011 | 14663 | 839.7   | -26.9985 | 4 K.PNPKPKP chr2@1246    | 2.67E-10 | 0.00599  |
| 31May2011 | 6675  | 789.71  | -20.3265 | 3 R.EEVCYQN Splice@chr   | 5.46E-11 | 0.001586 |
| 29Nov2011 | 1327  | 486.3   | 17.67099 | 2 K.KNRSKNF chr4@1181    | 3.02E-10 | 0.006551 |
| 29Nov2011 | 9716  | 643.85  | 13.76733 | 2 K.KWGGDE Splice@chr    | 9.79E-11 | 0.002722 |
| 29Nov2011 | 1162  | 498.27  | -3.39671 | 3 R.ESAIPAIA chr2@1415   | 2.51E-10 | 0.006339 |
| 29Nov2011 | 18875 | 1058.59 | 12.1553  | 2 P.QCRQKNI chr4@5994    | 2.14E-10 | 0.007848 |
| 31May2011 | 2062  | 1046.55 | -23.7003 | 1 R.SSIERWIF Splice@chr  | 1.33E-09 | 0.009009 |
| 29Nov2011 | 11156 | 979.18  | -6.23968 | 3 R.DHYTVPF chr1@1402    | 1.54E-10 | 0.00295  |
| 8Mar2011- | 15971 | 872.96  | -13.3409 | 2 K.FSEKFLAC chr2@1985   | 2.96E-10 | 0.006557 |
| 31Mar2011 | 7192  | 634.81  | 4.868721 | 2 K.LSNGM+ chr2@1844     | 1.92E-11 | 8.66E-04 |
| 8Mar2011- | 9798  | 503.31  | 6.500872 | 2 K.TRIATSSK chr5@1616   | 2.97E-10 | 0.007942 |
| 8Mar2011- | 3331  | 516.32  | 13.57722 | 2 _ .IDISATVA chr5@4337  | 8.37E-11 | 0.001493 |
| 29Nov2011 | 9347  | 766.49  | 25.91431 | 2 R.IATPQTK chr5@1722    | 1.68E-10 | 0.005066 |
| 29Nov2011 | 15414 | 1049.6  | -0.23283 | 2 R.FKKCRK+ chr5@4935    | 2.62E-10 | 0.009348 |
| 31May2011 | 6311  | 625.06  | 9.297649 | 3 K.SQPK+14 chr3@1156    | 1.52E-10 | 0.005972 |
| 29Nov2011 | 18644 | 1081.52 | -16.5854 | 2 R.ATNCYIYI chrX@1695   | 1.24E-10 | 0.003284 |
| 31Mar2011 | 2117  | 417.23  | 7.095109 | 3 I.MK+14.01 chr4@8585   | 1.24E-11 | 2.96E-04 |
| 31Mar2011 | 1885  | 417.23  | 7.095109 | 3 I.MK+14.01 chr4@8585   | 4.17E-11 | 0.00138  |
| 31May2011 | 3220  | 516.28  | -5.03702 | 2 R.LLQCPMI Splice@chr   | 4.18E-10 | 0.009153 |
| 8Mar2011- | 3068  | 425.25  | -10.7421 | 3 K.K+14.016 chr5@2074   | 3.02E-10 | 0.007416 |
| 8Mar2011- | 3477  | 425.25  | -10.7421 | 3 K.K+14.016 chr5@2074   | 3.20E-10 | 0.007381 |
| 31Mar2011 | 1759  | 445.24  | -27.4515 | 3 K.QKTSEIAL chr5@1994   | 2.56E-10 | 0.003587 |
| 29Nov2011 | 2813  | 430.75  | -5.54301 | 2 R.IAMNVRI chr4@1296    | 2.40E-10 | 0.006398 |

|           |       |         |          |                         |          |          |
|-----------|-------|---------|----------|-------------------------|----------|----------|
| 31May2011 | 2586  | 579.04  | -5.38513 | 4 R.RHVESH chrX@414     | 5.01E-10 | 0.009163 |
| 8Mar2011  | 1247  | 474.29  | 12.20221 | 2 R.K+14.016 chr4@1021  | 3.89E-10 | 0.007243 |
| 29Nov2011 | 2116  | 524.29  | -15.117  | 2 _SEATVSL chrX@263     | 2.83E-10 | 0.007335 |
| 31Mar2011 | 4844  | 559.97  | -5.67804 | 3 K.RASK+14 chr4@443    | 2.22E-10 | 0.006031 |
| 29Nov2011 | 3004  | 831.48  | 3.681772 | 1 _DLEKVAR chr5@168     | 4.48E-10 | 0.009725 |
| 31May2011 | 7544  | 685.33  | -6.68926 | 2 K.FTQNTG chr4@139     | 1.31E-10 | 0.005249 |
| 31Mar2011 | 6685  | 832.44  | 20.16482 | 2 _KLPNSYD chr4@122     | 4.54E-10 | 0.008207 |
| 31Mar2011 | 3734  | 636.83  | -22.5581 | 2 K.KPLAIGGI chr2@8921  | 4.23E-10 | 0.008905 |
| 31Mar2011 | 7725  | 777.42  | 8.385328 | 3 E.VNTNMA chr2@284     | 3.46E-10 | 0.004507 |
| 31Mar2011 | 8567  | 777.75  | 2.64754  | 3 E.VNTNMA chr2@284     | 1.32E-10 | 0.002224 |
| 31Mar2011 | 7398  | 777.75  | 2.64754  | 3 E.VNTNMA chr2@284     | 7.31E-10 | 0.00912  |
| 31Mar2011 | 6741  | 777.75  | 2.64754  | 3 E.VNTNMA chr2@284     | 3.41E-10 | 0.004705 |
| 29Nov2011 | 12341 | 572.3   | 26.76251 | 3 _WKEKPSC Splice@chr   | 2.10E-10 | 0.008655 |
| 31Mar2011 | 5330  | 570.31  | -8.04072 | 2 K.LFKTFNQ chr1@365    | 3.00E-10 | 0.007006 |
| 29Nov2011 | 15670 | 1013.53 | -19.4099 | 2 Q.FWVVTI chr4@1631    | 3.65E-10 | 0.00863  |
| 31Mar2011 | 6814  | 724.07  | -22.6032 | 3 R.MITQKSP Splice@chr  | 1.74E-10 | 0.002367 |
| 29Nov2011 | 1622  | 623.31  | -8.53285 | 1 R.FGGAGS chr3@559     | 2.77E-10 | 0.00628  |
| 8Mar2011  | 17227 | 1049.58 | 9.930315 | 2 R.EK+14.01 chr2@573   | 1.15E-10 | 0.002335 |
| 8Mar2011  | 17220 | 856.43  | -6.38836 | 2 K.EEK+14.0 chr5@186   | 3.92E-10 | 0.009599 |
| 31May2011 | 5029  | 797.4   | -12.9565 | 3 K.YDITRM+ chr2@129    | 4.41E-11 | 0        |
| 31May2011 | 5190  | 797.41  | -0.48468 | 3 K.YDITRM+ chr2@129    | 3.48E-10 | 0.006892 |
| 29Nov2011 | 9767  | 968.04  | -12.623  | 3 R.DEEQSDE Splice@chr  | 1.41E-12 | 3.54E-04 |
| 29Nov2011 | 9319  | 968.04  | -12.623  | 3 R.DEEQSDE Splice@chr  | 8.13E-14 | 0        |
| 31Mar2011 | 4302  | 562.82  | -16.5802 | 2 K.KIIHLENE chr3@134   | 5.26E-10 | 0.006489 |
| 31Mar2011 | 8679  | 503.96  | -24.0275 | 3 R.PSENCLKI chr1@827   | 3.71E-10 | 0.006152 |
| 31Mar2011 | 7853  | 503.96  | -24.0275 | 3 R.PSENCLKI chr1@827   | 2.94E-10 | 0.00478  |
| 31Mar2011 | 4950  | 503.96  | -24.0275 | 3 R.PSENCLKI chr1@827   | 5.43E-10 | 0.009051 |
| 31Mar2011 | 7281  | 503.96  | -24.0275 | 3 R.PSENCLKI chr1@827   | 4.41E-10 | 0.006649 |
| 8Mar2011  | 1395  | 460.28  | 12.64137 | 2 R.AKNTAKS chr1@7641   | 3.23E-10 | 0.008907 |
| 8Mar2011  | 465   | 460.28  | 12.64137 | 2 R.AKNTAKS chr1@7641   | 4.83E-10 | 0.009595 |
| 31Mar2011 | 2737  | 886.51  | -12.1712 | 2 R.K+14.016 Splice@chr | 2.21E-10 | 0.002427 |
| 29Nov2011 | 8113  | 733.4   | -9.58363 | 2 _STRIFQQI chr3@102    | 2.82E-10 | 0.009503 |
| 31Mar2011 | 13092 | 781.96  | 23.97179 | 2 K.KLHYDGT Splice@chr  | 4.79E-10 | 0.009204 |
| 31Mar2011 | 8884  | 772.09  | -28.7061 | 3 I.K+14.016 chr5@115   | 4.36E-10 | 0.006324 |
| 29Nov2011 | 2229  | 517.76  | -14.4096 | 2 R.KSLGDYS chr1@374    | 2.01E-10 | 0.004697 |
| 31Mar2011 | 10475 | 870.82  | 25.85757 | 3 K.GQNSLKN chr4@265    | 5.01E-10 | 0.007537 |
| 29Nov2011 | 8672  | 635.35  | 25.97955 | 2 K.QYTQFQ chr4@965     | 3.20E-10 | 0.008598 |
| 29Nov2011 | 16138 | 1152.58 | -6.75967 | 2 K.FSRPREN chr1@128    | 5.83E-11 | 0.002369 |
| 31Mar2011 | 8603  | 867.44  | -28.2272 | 2 Q.NPTWAC chr3@578     | 8.46E-11 | 0.002446 |
| 31Mar2011 | 4105  | 472.28  | 8.936372 | 2 R.NNRSVV Splice@chr   | 1.22E-10 | 0.002398 |
| 31Mar2011 | 9372  | 780.08  | 16.95677 | 3 R.YENQVVS chr1@228    | 1.22E-10 | 0.003184 |
| 31Mar2011 | 10656 | 1163.54 | -17.1153 | 2 K.FFFKMFE chr2@1771   | 5.65E-10 | 0.009174 |
| 31May2011 | 7577  | 954.53  | -0.70411 | 1 K.MRELIHR chr3@121    | 3.22E-10 | 0.006637 |
| 29Nov2011 | 27859 | 819.43  | -8.79996 | 4 K.NLESLNF chr5@177    | 2.27E-10 | 0.006115 |
| 29Nov2011 | 9082  | 760.74  | -15.7251 | 3 K.NNSLGLF chr5@396    | 1.44E-10 | 0.005968 |
| 29Nov2011 | 17715 | 738.92  | 26.86091 | 2 R.M+15.99 Splice@chr  | 1.82E-10 | 0.004548 |
| 29Nov2011 | 15064 | 738.92  | 26.86091 | 2 R.M+15.99 Splice@chr  | 6.56E-11 | 0.00249  |

|           |       |         |          |                         |          |          |
|-----------|-------|---------|----------|-------------------------|----------|----------|
| 8Mar2011- | 9664  | 695.42  | -13.6758 | 2 R.ISEKKSEK Splice@chr | 3.11E-10 | 0.007271 |
| 29Nov2011 | 12169 | 811.47  | 3.053241 | 2 K.REVWLPF chr5@1628   | 2.29E-10 | 0.006398 |
| 31May2011 | 2648  | 718.35  | -25.9503 | 2 R.ERSFLLGI Splice@chr | 2.04E-10 | 0.006536 |
| 31May2011 | 2803  | 718.35  | -25.9503 | 2 R.ERSFLLGI Splice@chr | 1.90E-10 | 0.006536 |
| 31May2011 | 2699  | 718.35  | -25.9503 | 2 R.ERSFLLGI Splice@chr | 2.34E-10 | 0.007179 |
| 29Nov2011 | 407   | 439.24  | -19.9161 | 2 R.NVPVPHS chr5@6648   | 2.32E-11 | 5.09E-04 |
| 29Nov2011 | 17774 | 804.95  | 17.68963 | 2 _FLEAFGN chr2@1074    | 3.32E-10 | 0.009028 |
| 31May2011 | 8070  | 866.46  | 20.78304 | 2 K.WRDWGI chr4@6027    | 5.32E-11 | 0.001992 |
| 29Nov2011 | 12292 | 1230.63 | -21.5421 | 2 K.PK+14.01 chr4@4932  | 5.75E-11 | 0.002527 |
| 29Nov2011 | 4279  | 709.34  | -12.408  | 2 R.ENNDFCI Splice@chr  | 1.20E-10 | 0.00306  |
| 8Mar2011- | 985   | 548.32  | -5.91042 | 2 K.EREKHLR chr1@8495   | 4.08E-10 | 0.009676 |
| 8Mar2011- | 1015  | 548.32  | -5.91042 | 2 K.EREKHLR chr1@8495   | 2.89E-10 | 0.006903 |
| 8Mar2011- | 1046  | 548.32  | -5.91042 | 2 K.EREKHLR chr1@8495   | 4.17E-10 | 0.009869 |
| 8Mar2011- | 955   | 548.31  | -24.1993 | 2 K.EREKHLR chr1@8495   | 2.63E-10 | 0.006404 |
| 8Mar2011- | 1449  | 548.32  | -5.91042 | 2 K.EREKHLR chr1@8495   | 3.51E-10 | 0.007869 |
| 8Mar2011- | 1693  | 548.32  | -5.91042 | 2 K.EREKHLR chr1@8495   | 3.63E-10 | 0.007454 |
| 31Mar2011 | 12857 | 789.96  | 25.22075 | 2 _NKPVRK+ chrX@2764    | 1.31E-10 | 0.002304 |
| 29Nov2011 | 10647 | 772.73  | 0.527264 | 3 R.M+15.99 chrX@5126   | 3.76E-10 | 0.008738 |
| 31May2011 | 7271  | 928.8   | 10.20129 | 3 R.TTGVVLD Splice@chr  | 6.35E-11 | 0.001113 |
| 8Mar2011- | 15404 | 1172.63 | -28.3238 | 2 G.EFLFKSEI chr1@5903  | 2.25E-10 | 0.005357 |
| 29Nov2011 | 11576 | 852.95  | -16.0917 | 2 H.FCMGK+ chr5@2016    | 3.98E-10 | 0.009408 |
| 29Nov2011 | 23220 | 679.12  | -11.5918 | 4 _FNKVIK+1 Splice@chr  | 1.87E-10 | 0.004631 |
| 8Mar2011- | 18349 | 970.49  | -8.84878 | 2 _ADWTIM chr2@5781     | 1.40E-10 | 0.00452  |
| 31Mar2011 | 9004  | 610.32  | 23.74099 | 2 _YEK+14.0 chrX@1098   | 3.71E-10 | 0.007281 |
| 31Mar2011 | 2928  | 532.28  | -1.26373 | 2 K.KIHNSYS chr5@6238   | 1.45E-10 | 0.002089 |
| 31Mar2011 | 7988  | 853.43  | -12.2438 | 2 K.QNEKGIC chr5@1197   | 1.01E-10 | 0.001997 |
| 8Mar2011- | 10552 | 737.38  | -25.6112 | 2 R.SRHRDLG chrX@4128   | 5.02E-10 | 0.00996  |
| 29Nov2011 | 11740 | 1057.59 | -15.1119 | 2 K.QKAKKCI chr2@4929   | 1.19E-10 | 0.00319  |
| 8Mar2011- | 20993 | 1063.55 | -28.4744 | 2 K.MKYFFLT chrX@1475   | 2.35E-10 | 0.009458 |
| 31Mar2011 | 13577 | 992.53  | -0.27606 | 2 K.INKMSIM chr1@6063   | 1.33E-10 | 0.002888 |
| 8Mar2011- | 4138  | 869.49  | -11.1741 | 1 R.KIGHTWt chr3@5992   | 1.61E-10 | 0.004248 |
| 8Mar2011- | 5861  | 869.49  | -11.1741 | 1 R.KIGHTWt chr3@5992   | 1.61E-10 | 0.003833 |
| 8Mar2011- | 4678  | 869.49  | -11.1741 | 1 R.KIGHTWt chr3@5992   | 1.63E-10 | 0.003607 |
| 8Mar2011- | 7057  | 869.49  | -11.1741 | 1 R.KIGHTWt chr3@5992   | 2.34E-10 | 0.003714 |
| 8Mar2011- | 4987  | 869.49  | -11.1741 | 1 R.KIGHTWt chr3@5992   | 1.58E-10 | 0.004117 |
| 8Mar2011- | 4933  | 869.49  | -11.1741 | 1 R.KIGHTWt chr3@5992   | 2.99E-10 | 0.00725  |
| 8Mar2011- | 7383  | 869.49  | -11.1741 | 1 R.KIGHTWt chr3@5992   | 1.82E-10 | 0.004335 |
| 8Mar2011- | 7104  | 869.49  | -11.1741 | 1 R.KIGHTWt chr3@5992   | 2.98E-10 | 0.006766 |
| 8Mar2011- | 6387  | 869.49  | -11.1741 | 1 R.KIGHTWt chr3@5992   | 1.64E-10 | 0.004067 |
| 31Mar2011 | 9936  | 821.46  | -15.9653 | 2 _NFK+14.0 chr2@4694   | 2.30E-10 | 0.002381 |
| 29Nov2011 | 20489 | 956.58  | -18.0925 | 1 R.VENLIVIR chr3@1187  | 2.99E-10 | 0.00772  |
| 31Mar2011 | 1544  | 687.38  | 17.8741  | 1 K.DSAPLGK chr1@9848   | 3.28E-10 | 0.005267 |
| 31May2011 | 9701  | 1139.49 | -13.1881 | 1 R.AFFFDYD chr3@8306   | 4.10E-11 | 6.18E-04 |
| 29Nov2011 | 3036  | 634.35  | -10.4078 | 2 K.KIVMMK: Splice@chr  | 1.11E-10 | 0.002675 |
| 31Mar2011 | 13067 | 904.95  | -11.9369 | 4 K.SSTANW: chrX@1202   | 5.55E-10 | 0.004953 |
| 31Mar2011 | 7905  | 858.48  | 14.74113 | 3 I.EKEKKED: Splice@chr | 4.67E-10 | 0.00671  |
| 29Nov2011 | 11944 | 749.43  | 4.488329 | 3 K.NKQKK+1 chrX@1031   | 9.72E-11 | 0.005016 |

|           |       |         |          |                         |          |          |
|-----------|-------|---------|----------|-------------------------|----------|----------|
| 29Nov2011 | 17061 | 815.44  | 28.85349 | 2 K.DLPIFAH chr1@1212   | 1.93E-10 | 0.004748 |
| 31May2011 | 2442  | 483.63  | 10.62323 | 3 R.LDLK+14. chrX@1551  | 6.23E-10 | 0.007849 |
| 29Nov2011 | 6001  | 561.32  | -23.4931 | 2 I.FLLGGKM chr5@9152   | 2.39E-10 | 0.006455 |
| 8Mar2011- | 5091  | 405.25  | 20.20077 | 3 _EPPTSRI chr5@2038    | 1.97E-10 | 0.004886 |
| 8Mar2011- | 12835 | 750.36  | 20.41888 | 2 R.RCFDLTEI chr3@6947  | 2.63E-10 | 0.007918 |
| 31Mar2011 | 2930  | 667.84  | 6.773266 | 2 K.NSYFTLDI chr1@1346  | 6.03E-10 | 0.009957 |
| 31May2011 | 9663  | 865.09  | -20.232  | 3 K.FEFAVK+ chr2@2251   | 5.53E-10 | 0.009199 |
| 29Nov2011 | 12959 | 1063.63 | -1.92408 | 2 _CLEILELLC Splice@chr | 2.28E-10 | 0.005547 |
| 8Mar2011- | 3397  | 669.37  | -20.5148 | 2 R.KREQLGC chr4@5122   | 3.83E-10 | 0.007322 |
| 29Nov2011 | 12160 | 565.27  | 0.470275 | 3 K.WQK+14. chr4@1314   | 3.27E-10 | 0.007399 |
| 8Mar2011- | 459   | 733.39  | -13.2505 | 1 R.FPVGASR chr1@4620   | 3.20E-10 | 0.007169 |
| 31May2011 | 10322 | 733.9   | -21.1526 | 2 _WVARRN Splice@chr    | 2.18E-10 | 0.004906 |
| 31May2011 | 3016  | 898.47  | 4.556598 | 2 K.MLELK+1 chr3@1155   | 1.15E-10 | 0.00205  |
| 31May2011 | 3280  | 844.45  | -25.9058 | 2 Q.KCGFAKF chr3@1228   | 2.21E-10 | 0        |
| 31Mar2011 | 3420  | 485.95  | 18.71164 | 3 _AWIDGKI Splice@chr   | 4.75E-10 | 0.006919 |
| 31Mar2011 | 5570  | 565.29  | -13.6929 | 2 K.LQYSLYW chr5@5170   | 2.63E-10 | 0.004634 |
| 29Nov2011 | 15785 | 891.98  | -14.1801 | 2 R.RRQQPRI chr2@9076   | 3.09E-10 | 0.006634 |
| 31May2011 | 5582  | 596.83  | 13.11231 | 2 K.KSEFSAL\ chr3@1285  | 4.52E-10 | 0.009703 |
| 8Mar2011- | 7885  | 618.3   | 24.71952 | 1 R.ADADAR. chrX@9995   | 3.39E-10 | 0.007143 |
| 31Mar2011 | 237   | 488.28  | -0.68743 | 2 R.ALESSRRI chr4@1014  | 1.79E-10 | 0.003201 |
| 31Mar2011 | 8537  | 1033.5  | 3.428647 | 2 _QRFQK+1 chr5@9256    | 9.04E-11 | 0.001888 |
| 29Nov2011 | 18732 | 889.48  | 11.7895  | 2 _K+14.016 chrX@1188   | 4.25E-10 | 0.009438 |
| 8Mar2011- | 3100  | 439.72  | 11.61694 | 2 R.ESNDASK chr1@8022   | 1.32E-10 | 0.003733 |
| 29Nov2011 | 21970 | 1192.09 | -27.9634 | 2 K.CLYSNILC chr3@1077  | 3.48E-10 | 0.007499 |
| 8Mar2011- | 8693  | 1106.62 | -21.4918 | 1 K.MTKNSAI chr2@1345   | 1.30E-10 | 0.003144 |
| 8Mar2011- | 9487  | 1106.62 | -21.4918 | 1 K.MTKNSAI chr2@1345   | 2.91E-10 | 0.007803 |
| 31May2011 | 5202  | 799.92  | -15.4321 | 4 K.IMKTLDF chr4@1180   | 3.17E-10 | 0.007905 |
| 31May2011 | 2470  | 577.96  | 25.37067 | 3 R.QFSFSAT. chrX@1764  | 3.67E-10 | 0.007338 |
| 31Mar2011 | 8655  | 889.98  | 22.03974 | 2 K.FQFRQFA chr5@1788   | 1.33E-10 | 0.002959 |
| 8Mar2011- | 944   | 746.4   | -13.7719 | 1 _RQGTAGI chr4@1631    | 1.60E-10 | 0.004067 |
| 29Nov2011 | 26440 | 1070.56 | 10.97993 | 3 K.GTGNSYF chr3@3200   | 2.31E-10 | 0.006557 |
| 29Nov2011 | 8088  | 1325.17 | -16.5934 | 2 _ADGNPRI Splice@chr   | 2.17E-10 | 0.007981 |
| 29Nov2011 | 15103 | 994.05  | 2.581445 | 2 R.RRK+14.C chr4@1176  | 3.53E-10 | 0.006781 |
| 8Mar2011- | 14450 | 1048.27 | 26.29436 | 3 _NKEMTT( chr1@5896    | 3.70E-10 | 0.007115 |
| 31Mar2011 | 7544  | 785.91  | -22.2132 | 2 R.VQNLCF( Splice@chr  | 4.66E-10 | 0.006188 |
| 8Mar2011- | 2134  | 764.4   | -14.791  | 2 R.K+14.016 chr4@4854  | 1.75E-10 | 0.004682 |
| 29Nov2011 | 15335 | 765.38  | -22.1844 | 4 R.KNSNRRE chr3@1358   | 2.81E-10 | 0.006749 |
| 31Mar2011 | 5007  | 658.35  | -19.5581 | 2 K.TMFHILH chr4@3711   | 4.09E-10 | 0.006664 |
| 31May2011 | 3340  | 682.85  | 20.67841 | 2 _RCCIGAQ chr2@4413    | 2.64E-10 | 0.006459 |
| 8Mar2011- | 5912  | 544.32  | -20.8946 | 2 R.PKM+15. chrX@1657   | 4.27E-10 | 0.008808 |
| 8Mar2011- | 1411  | 957.51  | -9.50772 | 1 R.IGMTVAS chr5@1976   | 1.20E-10 | 0.003628 |
| 31Mar2011 | 13821 | 926.46  | -23.3464 | 2 R.NWKRF( Splice@chr   | 1.67E-10 | 0.00406  |
| 31Mar2011 | 8622  | 1077.09 | 17.39402 | 2 K.SSWCFK\ chr4@7312   | 1.37E-10 | 0.0012   |
| 31Mar2011 | 8586  | 681.82  | 4.0837   | 2 K.TCDNPA Splice@chr   | 4.28E-11 | 6.40E-04 |
| 31Mar2011 | 6875  | 681.82  | 4.0837   | 2 K.TCDNPA Splice@chr   | 1.40E-10 | 0.001032 |
| 8Mar2011- | 15722 | 1181.64 | -23.9868 | 2 R.IVVLVSF chr3@1354   | 1.96E-10 | 0.005245 |
| 29Nov2011 | 19347 | 972.44  | -20.7117 | 2 K.IGWDMN Splice@chr   | 2.17E-10 | 0.005883 |

|           |       |         |          |                          |          |          |
|-----------|-------|---------|----------|--------------------------|----------|----------|
| 8Mar2011- | 7091  | 769.47  | 16.89053 | 2 _..FFKGK+1. chr5@7065  | 1.58E-10 | 0.00387  |
| 8Mar2011- | 18785 | 1150.98 | -24.9094 | 3 _..MKMGIM Splice@chr   | 1.12E-10 | 0.002644 |
| 29Nov2011 | 19260 | 750.93  | -20.9164 | 2 K.NSDRSRK chr5@9564    | 1.52E-10 | 0.00416  |
| 29Nov2011 | 18052 | 985.51  | 0.280214 | 2 R.M+15.99 chr5@1211    | 1.52E-10 | 0.00416  |
| 31Mar2011 | 13036 | 988.08  | -4.73164 | 2 R.KIKNFKFC chr1@7684   | 3.35E-10 | 0.003566 |
| 31Mar2011 | 13914 | 988.08  | -4.73164 | 2 R.KIKNFKFC chr1@7684   | 4.41E-10 | 0.00798  |
| 29Nov2011 | 13158 | 1119.6  | -10.5619 | 2 R.IQFCLCM chr4@6765    | 2.76E-10 | 0.006948 |
| 29Nov2011 | 11724 | 995.53  | 3.408919 | 2 _..LFPPTIFP Splice@chr | 1.47E-10 | 0.004695 |
| 29Nov2011 | 8601  | 716.41  | -24.8263 | 2 R.WFLGILN chr5@2015    | 1.86E-10 | 0.005688 |
| 31Mar2011 | 4982  | 663.81  | -22.3458 | 2 _..NSQTSCI( chrX@1614  | 5.51E-10 | 0.0065   |
| 31May2011 | 6987  | 552.81  | 12.0567  | 2 _..KHCSGKII Splice@chr | 5.54E-10 | 0.009625 |
| 31Mar2011 | 11522 | 969.5   | -2.85694 | 3 K.NRSPSST' Splice@chr  | 1.48E-10 | 0.003    |
| 29Nov2011 | 2212  | 494.77  | 7.293188 | 2 K.MTILPSG chr1@1207    | 2.50E-11 | 0.001494 |
| 29Nov2011 | 14958 | 1115.28 | -5.18542 | 3 G.K+14.016 chr1@1247   | 6.40E-11 | 0.001413 |
| 8Mar2011- | 17121 | 937.99  | -4.72402 | 2 K.TFKIIFV/ Splice@chr  | 2.89E-10 | 0.006379 |
| 8Mar2011- | 5003  | 1019.49 | 2.696748 | 1 R.LSCDAIPF chrX@1047   | 1.47E-10 | 0.004706 |
| 8Mar2011- | 883   | 432.2   | -21.4829 | 3 P.QAHFNAI Splice@chr   | 2.26E-11 | 3.86E-04 |
| 8Mar2011- | 1006  | 432.2   | -21.4829 | 3 P.QAHFNAI Splice@chr   | 1.31E-10 | 0.003219 |
| 8Mar2011- | 984   | 432.2   | -21.4829 | 3 P.QAHFNAI Splice@chr   | 1.16E-10 | 0.002754 |
| 29Nov2011 | 22053 | 1009.02 | -22.504  | 2 F.KKM+15.1 chr5@1457   | 5.10E-11 | 0.001749 |
| 29Nov2011 | 19739 | 726.37  | -24.2151 | 3 R.EK+14.01 chr4@9951   | 4.72E-10 | 0.009682 |
| 31Mar2011 | 8742  | 705.86  | -26.4101 | 2 R.RSK+14.0 chr2@3817   | 1.84E-10 | 0.00256  |
| 29Nov2011 | 12975 | 852.49  | 10.19335 | 1 R.GAAK+14 chrX@1600    | 5.01E-11 | 0.002276 |
| 29Nov2011 | 3489  | 796.93  | 14.11021 | 2 K.WQNQK\ chr2@1018     | 2.20E-10 | 0.008321 |
| 31May2011 | 9514  | 552.82  | 3.157169 | 2 K.LYFKKNYI chrX@2781   | 3.58E-10 | 0.00777  |
| 29Nov2011 | 1837  | 624.34  | 7.050112 | 1 K.VPSGAPP chr1@1311    | 7.45E-11 | 0.001772 |
| 8Mar2011- | 11497 | 656.35  | -16.915  | 2 K.FINFSNN' Splice@chr  | 3.62E-10 | 0.005503 |
| 8Mar2011- | 10883 | 656.35  | -16.915  | 2 K.FINFSNN' Splice@chr  | 2.44E-10 | 0.007638 |
| 29Nov2011 | 16737 | 1157.1  | -8.00083 | 2 K.K+14.016 chr5@7037   | 1.94E-10 | 0.006229 |
| 31Mar2011 | 5754  | 589.83  | -26.5043 | 2 E.TTK+14.0 chr5@1471   | 5.26E-10 | 0.008188 |
| 31Mar2011 | 2231  | 538.29  | 6.540136 | 2 K.LLDCAQN Splice@chr   | 3.39E-10 | 0.005742 |
| 29Nov2011 | 6192  | 435.78  | 28.6392  | 2 K.KDPKARR chr2@9488    | 4.00E-10 | 0.008397 |
| 29Nov2011 | 11852 | 589.85  | 6.796919 | 2 K.GIGFLWN chrX@8435    | 1.80E-10 | 0.003255 |
| 8Mar2011- | 18010 | 791.41  | 12.74153 | 2 _..RRKCEGN Splice@chr  | 7.13E-11 | 0.002345 |
| 31Mar2011 | 5818  | 585.66  | -24.1274 | 3 K.TKKKCLKSc chr4@1051  | 2.47E-10 | 0.008041 |
| 31Mar2011 | 13620 | 550.63  | 16.2875  | 3 R.TGMIFGS Splice@chr   | 4.50E-10 | 0.004311 |
| 29Nov2011 | 2185  | 860.45  | -19.0322 | 1 R.TMPKDLF chr5@6272    | 1.61E-10 | 0.004146 |
| 31Mar2011 | 3125  | 1117.61 | 24.37963 | 1 K.CGHLTIAI chr5@1685   | 5.59E-10 | 0.00835  |
| 29Nov2011 | 5956  | 762.4   | 24.4276  | 2 K.FTPWNTI chrX@8281    | 1.72E-10 | 0.005336 |
| 8Mar2011- | 8009  | 552.33  | -22.5469 | 2 _..NITVRKFI chr1@2224  | 1.25E-10 | 0.004044 |
| 29Nov2011 | 13342 | 623.3   | -6.5714  | 2 R.FSYVVS17 chr2@5992   | 1.46E-10 | 0.00327  |
| 8Mar2011- | 5258  | 563.29  | 27.65306 | 2 K.FNSTWGI chr4@3084    | 1.82E-10 | 0.005284 |
| 31Mar2011 | 209   | 471.95  | 11.83714 | 3 R.LDENGNI chrX@5725    | 6.79E-10 | 0.009227 |
| 8Mar2011- | 6312  | 726.92  | -28.3104 | 2 K.KLLHVRK' chr1@1090   | 4.82E-11 | 0.001233 |
| 29Nov2011 | 3697  | 1115.62 | -21.9032 | 1 R.RRGMRA chrX@1022     | 7.21E-11 | 0.002886 |
| 29Nov2011 | 9606  | 1148.6  | 11.44687 | 1 K.PRPFFCA chr4@1251    | 3.55E-10 | 0.009248 |
| 31May2011 | 9461  | 724.35  | 5.175295 | 3 _..PGSQDPK Splice@chr  | 2.79E-10 | 0.008983 |

|           |       |         |          |                         |          |          |
|-----------|-------|---------|----------|-------------------------|----------|----------|
| 31May2011 | 6148  | 724.69  | 12.96735 | 3 _._PGSQDPK Splice@chr | 1.94E-10 | 0.005627 |
| 31May2011 | 6170  | 724.36  | 19.12609 | 3 _._PGSQDPK Splice@chr | 1.22E-10 | 0.004205 |
| 31May2011 | 5940  | 724.69  | 12.96735 | 3 _._PGSQDPK Splice@chr | 2.92E-10 | 0.008658 |
| 31May2011 | 3523  | 724.69  | 12.96735 | 3 _._PGSQDPK Splice@chr | 7.16E-10 | 0.008997 |
| 31May2011 | 3606  | 724.69  | 12.96735 | 3 _._PGSQDPK Splice@chr | 4.33E-10 | 0.002677 |
| 31May2011 | 11237 | 724.69  | 12.96735 | 3 _._PGSQDPK Splice@chr | 2.37E-10 | 0.005133 |
| 31May2011 | 9161  | 724.35  | 5.175295 | 3 _._PGSQDPK Splice@chr | 2.43E-10 | 0.007073 |
| 31May2011 | 3247  | 724.69  | 12.96735 | 3 _._PGSQDPK Splice@chr | 3.13E-10 | 0.001631 |
| 31May2011 | 11712 | 724.69  | 12.96735 | 3 _._PGSQDPK Splice@chr | 2.32E-10 | 0.00546  |
| 31Mar2011 | 13795 | 988.07  | -26.8792 | 2 R.RFKWQR chr4@369     | 3.90E-10 | 0.007042 |
| 31Mar2011 | 7542  | 760.92  | -6.3881  | 2 K.K+14.016 chr1@102   | 5.01E-10 | 0.006849 |
| 8Mar2011  | 650   | 883.41  | -4.15014 | 1 R.QFCFPGK Splice@chr  | 4.79E-10 | 0.009816 |
| 29Nov2011 | 14106 | 593.01  | -25.0869 | 3 K.NYQSNK chr4@303     | 1.44E-11 | 5.79E-04 |
| 29Nov2011 | 11813 | 880.49  | -4.13036 | 2 R.RSTQLPK chr5@844    | 2.32E-10 | 0.006721 |
| 8Mar2011  | 6701  | 870.43  | -13.731  | 2 G.YFKVM+ Splice@chr   | 5.02E-10 | 0.008822 |
| 31May2011 | 4653  | 922.96  | -18.1146 | 2 V.CRK+14.0 chr5@268   | 2.21E-10 | 0.005627 |
| 8Mar2011  | 2989  | 557.33  | -13.4944 | 2 _._ILSKFKYI chr3@191  | 4.49E-10 | 0.009171 |
| 31May2011 | 12455 | 810.92  | -24.4915 | 2 R.K+14.016 chr5@176   | 2.34E-10 | 0.005133 |
| 8Mar2011  | 11878 | 926.48  | -28.0281 | 1 K.ETGITIHR chr3@489   | 3.58E-10 | 0.008416 |
| 29Nov2011 | 23538 | 1106.59 | -19.9843 | 2 K.FLLFCDTL chr2@102   | 2.04E-10 | 0.003939 |
| 31Mar2011 | 4561  | 551.81  | 24.04665 | 2 R.QVEVT chr1@847      | 3.86E-10 | 0.005977 |
| 8Mar2011  | 3529  | 548.85  | -3.11947 | 2 K.KLVAASP chr2@509    | 4.12E-10 | 0.008342 |
| 31May2011 | 5959  | 923.48  | -16.4086 | 2 _._ARNGLTF Splice@chr | 6.41E-11 | 7.10E-04 |
| 31May2011 | 5729  | 923.48  | -16.4086 | 2 _._ARNGLTF Splice@chr | 2.99E-12 | 0        |
| 31May2011 | 5771  | 923.48  | -16.4086 | 2 _._ARNGLTF Splice@chr | 6.65E-11 | 0.00154  |
| 31May2011 | 4024  | 923.48  | -16.4086 | 2 _._ARNGLTF Splice@chr | 3.22E-13 | 0        |
| 31May2011 | 3996  | 923.48  | -16.4086 | 2 _._ARNGLTF Splice@chr | 4.61E-11 | 6.78E-04 |
| 31May2011 | 3675  | 923.48  | -16.4086 | 2 _._ARNGLTF Splice@chr | 2.14E-11 | 0        |
| 31May2011 | 3699  | 923.98  | -18.2269 | 2 _._ARNGLTF Splice@chr | 1.89E-12 | 0        |
| 31May2011 | 6832  | 923.48  | -16.4086 | 2 _._ARNGLTF Splice@chr | 4.08E-11 | 0.002558 |
| 31May2011 | 6788  | 923.48  | -16.4086 | 2 _._ARNGLTF Splice@chr | 1.95E-10 | 0.006123 |
| 31May2011 | 7003  | 923.98  | -18.2269 | 2 _._ARNGLTF Splice@chr | 1.91E-10 | 0.004345 |
| 31May2011 | 4843  | 923.48  | -16.4086 | 2 _._ARNGLTF Splice@chr | 2.45E-10 | 0.005978 |
| 31May2011 | 4545  | 923.98  | -18.2269 | 2 _._ARNGLTF Splice@chr | 2.00E-10 | 0.007528 |
| 31May2011 | 3592  | 923.98  | -18.2269 | 2 _._ARNGLTF Splice@chr | 1.61E-10 | 0.002654 |
| 29Nov2011 | 21172 | 1085.59 | -11.1184 | 2 V.VCLLNQY chr5@173    | 7.99E-11 | 0.001183 |
| 29Nov2011 | 21175 | 1085.09 | -9.57112 | 2 V.VCLLNQY chr5@173    | 2.98E-10 | 0.005781 |
| 29Nov2011 | 19975 | 1085.09 | -9.57112 | 2 V.VCLLNQY chr5@173    | 2.29E-10 | 0.005237 |
| 29Nov2011 | 19913 | 1085.08 | -18.8044 | 2 V.VCLLNQY chr5@173    | 2.63E-10 | 0.006178 |
| 29Nov2011 | 19911 | 1085.59 | -11.1184 | 2 V.VCLLNQY chr5@173    | 1.59E-10 | 0.003653 |
| 31Mar2011 | 12503 | 894.46  | -15.522  | 1 _._SSRGHPP chrX@140   | 4.12E-10 | 0.007042 |
| 29Nov2011 | 8347  | 699.87  | 16.59393 | 2 R.DTRDAEK chr3@102    | 5.47E-11 | 0.002276 |
| 31May2011 | 4144  | 416.45  | -27.1571 | 4 T.SLCLSYA chr2@777    | 1.36E-10 | 0.007246 |
| 31May2011 | 6982  | 745.89  | -27.1212 | 2 R.RSYMHA chrX@117     | 1.15E-11 | 6.38E-04 |
| 31Mar2011 | 53    | 460.23  | -8.10744 | 2 K.ETQTERR chr3@583    | 3.09E-10 | 0.007746 |
| 31Mar2011 | 19    | 460.23  | -8.10744 | 2 K.ETQTERR chr3@583    | 3.47E-10 | 0.006221 |
| 31Mar2011 | 8755  | 821.96  | -16.5791 | 2 R.KIDFFMIF chr2@122   | 6.22E-11 | 0.001168 |

|           |       |         |          |                         |          |          |
|-----------|-------|---------|----------|-------------------------|----------|----------|
| 29Nov2011 | 22527 | 1036.53 | 1.728952 | 3 R.ITSTSHRF Splice@chr | 1.60E-10 | 0.003035 |
| 29Nov2011 | 538   | 403.19  | 10.94316 | 2 K.DNAANG chr5@6738    | 1.27E-10 | 0.002592 |
| 8Mar2011- | 16665 | 812.45  | -5.02168 | 4 R.NSSVK+1 chr5@3567   | 3.73E-10 | 0.007523 |
| 8Mar2011- | 16924 | 898.18  | -17.0527 | 3 K.NCIFLIVN chr5@5524  | 9.93E-11 | 0.003103 |
| 8Mar2011- | 15047 | 760.41  | -29.3129 | 2 R.SWLLSES chr1@1101   | 4.03E-10 | 0.009938 |
| 31Mar2011 | 13419 | 1016.62 | 23.25805 | 1 K.GTEK+14 chr2@5126   | 5.46E-10 | 0.006134 |
| 29Nov2011 | 9782  | 1220.09 | -16.5217 | 2 R.QTGITAK chr2@1347   | 8.72E-11 | 0.00433  |
| 31Mar2011 | 6266  | 816.91  | -27.603  | 2 R.VLREQGE Splice@chr  | 6.60E-10 | 0.007338 |
| 31Mar2011 | 3504  | 846.45  | -5.48665 | 2 R.NRDAMII Splice@chr  | 4.30E-10 | 0.007469 |
| 8Mar2011- | 15272 | 645.34  | -8.8663  | 5 R.IHM+15.1 chr5@5479  | 2.52E-10 | 0.006149 |
| 29Nov2011 | 12347 | 1235.06 | -22.5364 | 2 K.MIMIGRI chr4@3040   | 7.89E-11 | 0.003614 |
| 31May2011 | 1102  | 488.27  | 24.17604 | 2 R.LHLTFCG chr4@1116   | 1.48E-10 | 0        |
| 31Mar2011 | 12327 | 960.98  | -12.4616 | 2 R.IFYHDFP5 chr2@1256  | 2.60E-10 | 0.005036 |
| 31May2011 | 13244 | 590.3   | -26.1878 | 4 _FFGGKNL chr2@1428    | 2.93E-10 | 0.007561 |
| 31Mar2011 | 13674 | 837.86  | -8.82496 | 2 R.LRCDNCV chr5@1630   | 2.38E-10 | 0.005081 |
| 31Mar2011 | 13236 | 837.86  | -8.82496 | 2 R.LRCDNCV chr5@1630   | 8.63E-10 | 0.008272 |
| 29Nov2011 | 16910 | 891.51  | -18.9853 | 2 G.SIRRITVN chr5@1540  | 8.90E-11 | 0.001469 |
| 29Nov2011 | 18857 | 787.43  | -4.63184 | 3 R.MTIDGR\ chr5@2485   | 1.40E-10 | 0.005219 |
| 31May2011 | 5673  | 679.37  | -21.1126 | 2 K.FRQIGIPI\ chr5@3991 | 2.08E-10 | 0.00561  |
| 8Mar2011- | 5966  | 564.27  | -14.6938 | 2 K.VDEIYCIS chr3@3879  | 3.55E-10 | 0.007344 |
| 31Mar2011 | 10370 | 1036.04 | -0.20546 | 2 K.LQNFTES chr1@1003   | 5.14E-11 | 9.56E-04 |
| 8Mar2011- | 12304 | 612.72  | -0.61812 | 5 K.KSGGGPF chr5@1305   | 3.46E-11 | 8.45E-04 |
| 29Nov2011 | 17562 | 986.06  | 26.19378 | 2 _HGSHELL Splice@chr   | 3.31E-11 | 8.57E-04 |
| 29Nov2011 | 17581 | 986.06  | 26.19378 | 2 _HGSHELL Splice@chr   | 1.32E-10 | 0.00319  |
| 31Mar2011 | 3738  | 552.35  | -8.41335 | 2 K.KVPMKIF chr5@3279   | 2.20E-10 | 0.004734 |
| 31Mar2011 | 4954  | 832.44  | 17.10474 | 2 K.TK+14.01 chr5@1368  | 2.58E-10 | 0.003284 |
| 31Mar2011 | 11261 | 1170.59 | -3.83634 | 2 K.KNITFLN5 chrX@6641  | 2.19E-10 | 0.006866 |
| 29Nov2011 | 7460  | 603.32  | -20.738  | 2 K.SSLNVISS Splice@chr | 3.71E-10 | 0.009918 |
| 29Nov2011 | 3363  | 1245.6  | -29.0173 | 2 _AWNSSQ chr4@9766     | 1.33E-10 | 0.004193 |
| 8Mar2011- | 8133  | 694.39  | 25.0635  | 2 K.NVISSLQI chr2@5301  | 1.89E-10 | 0.004468 |
| 8Mar2011- | 10967 | 694.39  | 25.0635  | 2 K.NVISSLQI chr2@5301  | 1.72E-10 | 0.002317 |
| 8Mar2011- | 10755 | 694.39  | 25.0635  | 2 K.NVISSLQI chr2@5301  | 6.14E-11 | 0.002345 |
| 29Nov2011 | 5719  | 615.86  | -10.5788 | 2 K.GNSK+14 chr4@5376   | 1.21E-10 | 0.004802 |
| 8Mar2011- | 20771 | 507.28  | -21.1368 | 4 K.VFLLHHFF chr5@1115  | 1.03E-10 | 0.004387 |
| 8Mar2011- | 20840 | 507.28  | -21.1368 | 4 K.VFLLHHFF chr5@1115  | 1.80E-10 | 0.004104 |
| 31Mar2011 | 10431 | 960.55  | 7.579646 | 1 R.RRMMLP chr1@2196    | 2.56E-10 | 0.009559 |
| 29Nov2011 | 23305 | 1062.08 | -17.0045 | 2 K.QKEQKK\ chr3@5628   | 3.14E-10 | 0.007709 |
| 29Nov2011 | 3505  | 907.48  | 2.797044 | 2 R.SCSKINM chr4@9135   | 1.87E-10 | 0.005834 |
| 31Mar2011 | 6066  | 628.44  | -14.4942 | 2 K.K+14.016 chr1@1613  | 1.02E-10 | 0.001394 |
| 8Mar2011- | 8797  | 1023.87 | -9.70638 | 3 K.NVFPHR\ chr4@8034   | 3.03E-10 | 0.006885 |
| 29Nov2011 | 1493  | 592.28  | 1.396564 | 2 R.RSSSQCC Splice@chr  | 1.10E-10 | 0.002361 |
| 29Nov2011 | 22958 | 894.98  | 0.700607 | 4 K.IKNVMNI chrX@2385   | 1.12E-10 | 0.002996 |
| 31Mar2011 | 10564 | 764.91  | -3.79629 | 2 K.FDSRRVK chr2@6066   | 3.53E-10 | 0.003711 |
| 31Mar2011 | 9341  | 764.91  | -3.79629 | 2 K.FDSRRVK chr2@6066   | 6.73E-10 | 0.00915  |
| 31Mar2011 | 9373  | 764.91  | -3.79629 | 2 K.FDSRRVK chr2@6066   | 5.63E-10 | 0.007751 |
| 31May2011 | 3002  | 407.24  | 14.02325 | 3 R.LLLPTIAC chr2@3641  | 2.43E-10 | 0.007428 |
| 31May2011 | 3078  | 948.52  | -7.02132 | 1 R.NSKFPVT chr1@4439   | 1.19E-10 | 0.002705 |

|           |       |         |          |                         |          |          |
|-----------|-------|---------|----------|-------------------------|----------|----------|
| 31May2011 | 3176  | 948.52  | -7.02132 | 1 R.NSKFPVT chr1@4439   | 6.91E-11 | 0.001513 |
| 29Nov2011 | 10163 | 711.39  | 15.55154 | 2 _..KKENFKN chr3@5001  | 1.66E-10 | 0.003961 |
| 31May2011 | 3050  | 838.88  | -14.7146 | 2 S.YDLHGDS Splice@chr  | 4.54E-17 | 0        |
| 31May2011 | 2918  | 839.38  | -16.7165 | 2 S.YDLHGDS Splice@chr  | 1.52E-16 | 0        |
| 31May2011 | 2889  | 838.88  | -14.7146 | 2 S.YDLHGDS Splice@chr  | 2.71E-16 | 0        |
| 31May2011 | 2986  | 838.88  | -14.7146 | 2 S.YDLHGDS Splice@chr  | 6.31E-17 | 0        |
| 31May2011 | 2817  | 839.38  | -16.7165 | 2 S.YDLHGDS Splice@chr  | 1.38E-16 | 0        |
| 31May2011 | 2849  | 838.88  | -14.7146 | 2 S.YDLHGDS Splice@chr  | 3.32E-16 | 0        |
| 31May2011 | 2903  | 839.38  | -16.7165 | 2 S.YDLHGDS Splice@chr  | 2.17E-16 | 0        |
| 31May2011 | 2932  | 839.38  | -16.7165 | 2 S.YDLHGDS Splice@chr  | 5.07E-16 | 0        |
| 31May2011 | 3062  | 839.38  | -16.7165 | 2 S.YDLHGDS Splice@chr  | 7.00E-17 | 0        |
| 31Mar2011 | 8917  | 1057.02 | -10.9815 | 2 _..RDYWKTI Splice@chr | 3.67E-10 | 0.007298 |
| 31May2011 | 2444  | 642.07  | -4.73766 | 4 K.FQYFFLLF chr4@1580  | 8.87E-10 | 0.009009 |
| 8Mar2011- | 11241 | 1049.21 | -15.5273 | 3 R.KTLAQKN Splice@chr  | 4.65E-10 | 0.009298 |
| 8Mar2011- | 18128 | 713.71  | -4.42574 | 3 K.LIGTDPE/ Splice@chr | 9.05E-13 | 0        |
| 8Mar2011- | 15072 | 933.75  | 3.289643 | 4 K.IFQIPSAA chr5@1460  | 1.74E-10 | 0.005298 |
| 8Mar2011- | 11297 | 1074.53 | -28.1831 | 2 K.K+14.016 chr5@1822  | 1.02E-10 | 0.003373 |
| 29Nov2011 | 15687 | 1040.51 | -29.1896 | 3 K.M+15.99 chr5@1919   | 8.28E-11 | 0.002585 |
| 31Mar2011 | 296   | 787.47  | 2.793868 | 1 K.KLEGNVK chr5@6437   | 9.52E-10 | 0.009146 |
| 31Mar2011 | 9850  | 992.53  | 18.52901 | 2 R.K+14.016 Splice@chr | 6.31E-11 | 0.00221  |
| 8Mar2011- | 20486 | 1126.58 | 9.326941 | 3 K.KWEM+1 chr2@1514    | 1.16E-10 | 0.003628 |
| 31May2011 | 4564  | 616.98  | 3.699281 | 3 R.CLICAIILE chrX@1275 | 2.63E-10 | 0.005605 |
| 29Nov2011 | 20312 | 1019.19 | -22.9385 | 3 K.CTKWNF chr1@1274    | 1.85E-10 | 0.004295 |
| 29Nov2011 | 21338 | 812.76  | 4.539199 | 3 K.MLLEVLG Splice@chr  | 2.54E-10 | 0.005403 |
| 31Mar2011 | 2093  | 619.81  | -27.4895 | 2 R.AGISTGY chr5@7174   | 1.18E-10 | 0.002398 |
| 31Mar2011 | 7413  | 978.2   | -4.4138  | 3 S.LHPLHVV chr1@5691   | 7.81E-11 | 0.00221  |
| 29Nov2011 | 12041 | 990.02  | -19.6244 | 2 K.RM+15.9 chr4@9945   | 1.17E-10 | 0.004812 |
| 31May2011 | 5716  | 476.27  | 24.78648 | 2 R.NLMSFLA chr5@3222   | 3.25E-10 | 0.009981 |
| 31Mar2011 | 8815  | 802.43  | -6.77807 | 2 K.NMLEPNI chr3@4395   | 2.78E-10 | 0.004718 |
| 31Mar2011 | 3846  | 618.32  | -5.06224 | 5 R.RACSLAF chr2@8049   | 6.40E-10 | 0.008677 |
| 29Nov2011 | 11901 | 1239.64 | -18.1212 | 3 K.HVIPLALN chr4@9308  | 1.23E-10 | 0.004612 |
| 31Mar2011 | 1955  | 591.32  | 18.61139 | 2 R.QFVMTS Splice@chr   | 6.38E-11 | 0.001418 |
| 31Mar2011 | 8324  | 753.81  | 6.421362 | 5 R.FVGNFV/ chr1@1055   | 2.86E-10 | 0.004398 |
| 8Mar2011- | 1342  | 504.32  | -1.21174 | 2 R.KLVFTTG chrX@2314   | 2.74E-11 | 8.82E-04 |
| 31Mar2011 | 11170 | 1159.61 | -0.63216 | 3 K.KEDRIAQ chrX@1588   | 1.84E-10 | 0.002456 |
| 31May2011 | 11901 | 648.88  | -26.3777 | 2 R.NKK+14.( chrX@1645  | 1.69E-10 | 0.003536 |
| 31May2011 | 7115  | 648.88  | -26.3777 | 2 R.NKK+14.( chrX@1645  | 2.11E-11 | 0.001817 |
| 31May2011 | 7739  | 747.38  | -6.34041 | 2 R.MNHSKN Splice@chr   | 2.51E-11 | 0.001074 |
| 29Nov2011 | 4543  | 830.42  | -23.9893 | 2 K.SK+14.01 chr2@1506  | 1.32E-10 | 0.003457 |
| 31May2011 | 1129  | 479.79  | 26.0066  | 2 K.SHLIAVYF Splice@chr | 1.50E-10 | 0.004498 |
| 29Nov2011 | 13379 | 985.01  | 1.922855 | 2 K.K+14.016 chr1@1641  | 3.51E-10 | 0.008016 |
| 31Mar2011 | 2607  | 582.8   | -10.8055 | 2 R.M+15.99 chrX@3122   | 4.64E-10 | 0.006502 |
| 29Nov2011 | 12192 | 529.98  | -25.2062 | 3 K.KWLK+14 chr2@4815   | 2.10E-10 | 0.004802 |
| 31Mar2011 | 12519 | 1043.19 | -17.2421 | 3 K.KTLELVYI chr2@1000  | 3.81E-10 | 0.007447 |
| 29Nov2011 | 505   | 408.2   | 5.105304 | 2 K.FGGSSGF chr3@4509   | 2.54E-10 | 0.006455 |
| 8Mar2011- | 1210  | 422.25  | -2.10095 | 2 K.EAINVLG chr3@5088   | 6.42E-11 | 0.001315 |
| 8Mar2011- | 7732  | 692.38  | 2.736724 | 2 _..KKTNTYA Splice@chr | 3.70E-10 | 0.009332 |

|           |       |         |          |                         |          |          |
|-----------|-------|---------|----------|-------------------------|----------|----------|
| 8Mar2011- | 15702 | 851.4   | -10.776  | 1 R.GTAPSDf chr3@1375   | 2.62E-10 | 0.005102 |
| 29Nov2011 | 10165 | 953.46  | -20.3553 | 2 P.RGM+15. chrX@5267   | 3.18E-10 | 0.006073 |
| 29Nov2011 | 12773 | 953.46  | -20.3553 | 2 P.RGM+15. chrX@5267   | 1.02E-10 | 0.002053 |
| 29Nov2011 | 12774 | 952.96  | -18.5932 | 2 P.RGM+15. chrX@5267   | 3.58E-10 | 0.009334 |
| 29Nov2011 | 16866 | 601.35  | 10.41105 | 3 K.WMINGE Splice@chr   | 1.49E-10 | 0.003926 |
| 31Mar2011 | 2156  | 553.78  | 12.58764 | 2 R.DTIFGNF chr4@5363   | 2.76E-10 | 0.004839 |
| 29Nov2011 | 13508 | 884.98  | -29.0677 | 2 F.LCDILVLK chrX@1263  | 4.28E-10 | 0.00967  |
| 31Mar2011 | 3527  | 421.75  | 22.12297 | 2 R.LLPDGTa Splice@chr  | 7.08E-10 | 0.00895  |
| 31May2011 | 7674  | 871.49  | -6.41808 | 2 K.LLPHIVEN Splice@chr | 7.95E-11 | 0.003311 |
| 31Mar2011 | 11294 | 970.59  | 28.17079 | 1 _RIVPGSAI chr3@8508   | 4.87E-10 | 0.00712  |
| 31Mar2011 | 13483 | 972     | -16.5195 | 4 K.SRKFLPLN chr5@8977  | 4.39E-10 | 0.005732 |
| 29Nov2011 | 8660  | 626.33  | -4.60698 | 5 K.HWRTCQ Splice@chr   | 2.08E-10 | 0.008239 |
| 29Nov2011 | 6711  | 921.44  | -11.2728 | 1 K.MSTNFPF Splice@chr  | 1.53E-10 | 0.005595 |
| 29Nov2011 | 20694 | 1095.56 | -29.2994 | 1 K.K+14.016 chr4@1129  | 2.38E-10 | 0.006228 |
| 29Nov2011 | 14165 | 1095.56 | -29.2994 | 1 K.K+14.016 chr4@1129  | 2.35E-10 | 0.007864 |
| 29Nov2011 | 11086 | 844.69  | -2.17031 | 4 _IK+14.016 chr5@1495  | 9.46E-11 | 0.003955 |
| 29Nov2011 | 2486  | 1159.57 | -2.58179 | 1 R.QTVPAW chr2@1243    | 3.00E-11 | 0.00167  |
| 31May2011 | 10282 | 890.94  | 21.3301  | 2 K.MAENSN chr1@1971    | 1.54E-10 | 0.002057 |
| 8Mar2011- | 19904 | 1122.6  | -24.4876 | 2 R.RWMRRF chr5@1257    | 3.34E-10 | 0.007456 |
| 8Mar2011- | 9049  | 604.82  | 15.22765 | 2 _NGAEM+ chr4@5340     | 5.11E-11 | 0.002152 |
| 31May2011 | 8084  | 980.44  | -24.9884 | 2 K.QCYWRV chr3@4693    | 2.87E-10 | 0.008983 |
| 31Mar2011 | 12572 | 729.64  | -14.3072 | 4 K.K+14.016 chr5@6351  | 6.86E-10 | 0.009095 |
| 29Nov2011 | 5286  | 706.38  | -20.6499 | 2 K.QISEFSKk chrX@2108  | 1.93E-10 | 0.005153 |
| 31Mar2011 | 8979  | 789.96  | 11.37239 | 2 K.KMK+14. chr1@1280   | 4.64E-10 | 0.006147 |
| 8Mar2011- | 1426  | 878.45  | -11.2791 | 1 K.NTMANA chr1@8749    | 3.61E-10 | 0.007644 |
| 8Mar2011- | 1291  | 878.45  | -11.2791 | 1 K.NTMANA chr1@8749    | 2.72E-10 | 0.005747 |
| 8Mar2011- | 1462  | 878.45  | -11.2791 | 1 K.NTMANA chr1@8749    | 2.94E-10 | 0.006061 |
| 8Mar2011- | 1541  | 878.45  | -11.2791 | 1 K.NTMANA chr1@8749    | 3.26E-10 | 0.00703  |
| 8Mar2011- | 1393  | 878.45  | -11.2791 | 1 K.NTMANA chr1@8749    | 2.28E-10 | 0.004658 |
| 31Mar2011 | 8709  | 903.01  | -1.42099 | 2 K.K+14.016 chrX@2536  | 5.71E-10 | 0.009745 |
| 31Mar2011 | 4346  | 538.63  | -7.94689 | 3 R.ALPLGAT chr5@1949   | 4.41E-10 | 0.008021 |
| 31Mar2011 | 11160 | 447.23  | -16.8695 | 3 K.DTLRGTH chrX@1090   | 1.91E-10 | 0.004406 |
| 31May2011 | 5713  | 828.76  | 11.63141 | 3 K.CCSYSaV chrX@3585   | 2.43E-11 | 0        |
| 31Mar2011 | 2436  | 475.29  | 20.22043 | 3 K.FWK+14. chr4@3114   | 4.32E-10 | 0.008494 |
| 8Mar2011- | 10098 | 538.3   | -1.76041 | 2 K.VQNIDKT Splice@chr  | 5.25E-10 | 0.009873 |
| 8Mar2011- | 10660 | 1062.56 | 21.08375 | 2 _RRSLKIAC chr1@9145   | 2.59E-11 | 8.65E-04 |
| 8Mar2011- | 10711 | 1062.56 | 21.08375 | 2 _RRSLKIAC chr1@9145   | 7.23E-12 | 0        |
| 8Mar2011- | 12112 | 1062.56 | 21.08375 | 2 _RRSLKIAC chr1@9145   | 8.93E-11 | 0.002903 |
| 8Mar2011- | 14125 | 1062.55 | 11.64973 | 2 _RRSLKIAC chr1@9145   | 6.89E-12 | 3.81E-04 |
| 31Mar2011 | 7953  | 683.37  | 14.6695  | 2 R.SMDILCS Splice@chr  | 2.22E-10 | 0.003587 |
| 31May2011 | 7334  | 1192.6  | -8.58224 | 2 K.GIFCRVE chr1@4597   | 3.71E-10 | 0.008076 |
| 31Mar2011 | 6894  | 1041.57 | 4.457872 | 2 R.GLFK+14. Splice@chr | 1.34E-10 | 0.003215 |
| 29Nov2011 | 338   | 559.32  | 24.67655 | 2 _LSASASQ chr3@1255    | 1.97E-10 | 0.005234 |
| 31Mar2011 | 13234 | 1074.53 | 10.57515 | 2 K.FRCFFSE chrX@3480   | 4.64E-10 | 0.006823 |
| 29Nov2011 | 2350  | 674.85  | 1.902138 | 2 E.KM+15.9 chr1@8779   | 2.01E-10 | 0.0072   |
| 31Mar2011 | 4420  | 725.41  | -7.66723 | 2 R.LAFLSFFR Splice@chr | 3.56E-10 | 0.005735 |
| 29Nov2011 | 15473 | 884.01  | -16.6319 | 2 K.QFLK+14. chr5@1267  | 1.67E-10 | 0.004194 |

|           |       |         |          |                          |          |          |
|-----------|-------|---------|----------|--------------------------|----------|----------|
| 29Nov2011 | 2414  | 592.28  | -25.9811 | 2 R.QLFGGG\ chrX@6486    | 1.31E-10 | 0.004854 |
| 8Mar2011- | 988   | 573.32  | -25.5945 | 2 _..SSRINTRF Splice@chr | 2.10E-10 | 0.0055   |
| 29Nov2011 | 14696 | 1187.62 | -29.0979 | 2 R.KKM+15. Splice@chr   | 1.98E-10 | 0.005069 |
| 31Mar2011 | 7440  | 885.5   | 7.42361  | 2 _..HRMPTY\ chr2@1065   | 6.23E-10 | 0.008247 |
| 29Nov2011 | 17262 | 797.9   | -23.8837 | 4 K.SGDAGIV Splice@chr   | 3.75E-11 | 0.001106 |
| 29Nov2011 | 5054  | 474.27  | -15.4254 | 2 R.SSAVSRI\ Splice@chr  | 1.56E-10 | 0.004394 |
| 31May2011 | 3689  | 870.4   | 3.931462 | 1 _..PHAMVQ Splice@chr   | 3.66E-10 | 0.007026 |
| 31May2011 | 3653  | 870.4   | 3.931462 | 1 _..PHAMVQ Splice@chr   | 8.20E-11 | 0.004165 |
| 31May2011 | 3679  | 870.4   | 3.931462 | 1 _..PHAMVQ Splice@chr   | 6.54E-12 | 0        |
| 31May2011 | 2897  | 870.4   | 3.931462 | 1 _..PHAMVQ Splice@chr   | 1.74E-10 | 0.006227 |
| 31May2011 | 2874  | 870.4   | 3.931462 | 1 _..PHAMVQ Splice@chr   | 7.28E-11 | 0.003968 |
| 31May2011 | 3903  | 870.4   | 3.931462 | 1 _..PHAMVQ Splice@chr   | 1.75E-10 | 0.005186 |
| 29Nov2011 | 13632 | 1049.54 | 21.75927 | 3 R.KM+15.9 chr2@1248    | 1.35E-10 | 0.003467 |
| 29Nov2011 | 22464 | 698.03  | -23.6817 | 3 K.K+14.016 chrX@2277   | 3.23E-12 | 1.29E-04 |
| 8Mar2011- | 373   | 439.27  | -5.70989 | 2 K.KGGFRG\ Splice@chr   | 2.76E-10 | 0.005932 |
| 8Mar2011- | 10270 | 560.29  | -0.73601 | 4 R.YQLIAM+ chrX@5867    | 4.08E-10 | 0.007517 |
| 8Mar2011- | 514   | 598.76  | -11.4359 | 2 K.KDEEPCQ chrX@6050    | 7.33E-11 | 0.002345 |
| 31May2011 | 6186  | 768.06  | 20.19467 | 3 _..FQESNSR Splice@chr  | 1.55E-10 | 0.006227 |
| 31Mar2011 | 10893 | 915.97  | -4.33599 | 2 K.MAKFLK\ Splice@chr   | 2.33E-10 | 0.004523 |
| 31May2011 | 5154  | 687.89  | 15.5189  | 2 K.M+15.99 chrX@1548    | 1.93E-10 | 0.003861 |
| 31Mar2011 | 10032 | 920.5   | 12.87773 | 2 K.YCREEIN\ chrX@7045   | 6.49E-10 | 0.008354 |
| 31May2011 | 4493  | 904.95  | -29.5734 | 2 R.CIRFPCA\ chr4@5658   | 2.38E-10 | 0.008358 |
| 31Mar2011 | 4221  | 620.68  | 24.67188 | 3 K.FRK+14.0 chrX@1685   | 2.19E-10 | 0.006724 |
| 8Mar2011- | 4509  | 859.49  | -21.2086 | 1 K.DTAVAIIF chrX@8477   | 2.90E-10 | 0.009231 |
| 31Mar2011 | 89    | 820.37  | 27.18998 | 1 R.EGDGEW chrX@2116     | 2.95E-10 | 0.003902 |
| 31Mar2011 | 954   | 423.75  | 27.93815 | 2 K.ITLNNSGI chrX@3709   | 4.39E-10 | 0.007959 |
| 31Mar2011 | 1096  | 423.75  | 27.93815 | 2 K.ITLNNSGI chrX@3709   | 4.84E-10 | 0.008821 |
| 31Mar2011 | 1118  | 423.75  | 27.93815 | 2 K.ITLNNSGI chrX@3709   | 4.30E-10 | 0.007469 |
| 31Mar2011 | 992   | 423.75  | 27.93815 | 2 K.ITLNNSGI chrX@3709   | 3.37E-10 | 0.004005 |
| 31May2011 | 4318  | 1060    | -14.7315 | 2 K.YAFPEFF\ chr1@1932   | 7.35E-11 | 0.002007 |
| 31May2011 | 5750  | 1060    | -14.7315 | 2 K.YAFPEFF\ chr1@1932   | 1.08E-10 | 0.002722 |
| 8Mar2011- | 19758 | 826.88  | 0.186172 | 2 R.RRHFC\ chr1@2496     | 5.42E-11 | 8.22E-04 |
| 8Mar2011- | 10239 | 989.97  | 11.66453 | 2 _..PK+14.01 Splice@chr | 6.94E-11 | 0.003057 |
| 29Nov2011 | 1194  | 443.26  | 20.33386 | 3 K.VKFSEKS\ chr4@1546   | 2.02E-10 | 0.005398 |
| 29Nov2011 | 968   | 443.26  | 20.33386 | 3 K.VKFSEKS\ chr4@1546   | 2.59E-10 | 0.006312 |
| 8Mar2011- | 15251 | 579.35  | 12.0311  | 2 K.IAEIISELC chr3@1012  | 2.84E-10 | 0.007182 |
| 8Mar2011- | 12208 | 587.65  | 4.508487 | 3 R.RMNK+1. chr4@7305    | 2.06E-10 | 0.006619 |
| 31May2011 | 6448  | 711.42  | -9.27875 | 2 R.KIVKQDN chr1@3785    | 1.51E-10 | 0.004365 |
| 29Nov2011 | 1419  | 662.64  | -15.0429 | 3 K.M+15.99 chrX@9802    | 2.94E-11 | 0.002883 |
| 31May2011 | 9318  | 616.98  | -0.62673 | 3 K.MKAREG chr1@7875     | 1.54E-10 | 0.00551  |
| 31Mar2011 | 12952 | 980.55  | 27.97792 | 2 K.VIYLDKG\ chr1@1326   | 5.70E-10 | 0.006642 |
| 29Nov2011 | 20497 | 1192.97 | 8.691    | 3 K.ALSRRCY\ chr5@1257   | 8.53E-11 | 0.00225  |
| 8Mar2011- | 8109  | 679.37  | -1.43959 | 2 K.SYYESRK\ Splice@chr  | 2.57E-10 | 0.006983 |
| 29Nov2011 | 12415 | 1123.05 | 18.96697 | 2 K.K+14.016 Splice@chr  | 1.10E-10 | 0.002596 |
| 31Mar2011 | 9309  | 866.38  | -24.804  | 2 R.QMDFKT Splice@chr    | 2.00E-10 | 0.003986 |
| 31May2011 | 8143  | 587.33  | -20.0722 | 4 K.TLIK+14.0 chr4@5679  | 1.95E-10 | 0.003988 |
| 31May2011 | 6685  | 1013.49 | -4.00971 | 2 C.PFCSFDC chr2@1276    | 3.88E-10 | 0.007285 |

|            |       |         |          |                          |          |          |
|------------|-------|---------|----------|--------------------------|----------|----------|
| 31May2011- | 5202  | 1050.55 | -10.7002 | 2 R.KDDPFW Splice@chr    | 1.50E-11 | 3.83E-04 |
| 8Mar2011-  | 22039 | 976.57  | 6.828754 | 1 _..SSRRWKf chrX@1127   | 3.58E-10 | 0.008384 |
| 8Mar2011-  | 5235  | 554.79  | -16.4218 | 2 R.FSRQGIM Splice@chr   | 7.71E-11 | 0.002539 |
| 31Mar2011  | 8910  | 1004.49 | -23.0991 | 3 A.GRDGNIF chr5@1379    | 2.38E-10 | 0.006432 |
| 31May2011- | 8376  | 705.88  | 15.03588 | 2 M.AK+14.0 chrX@7037    | 2.57E-10 | 0.007863 |
| 31May2011- | 7560  | 705.88  | 15.03588 | 2 M.AK+14.0 chrX@7037    | 3.04E-10 | 0.005411 |
| 31May2011- | 8587  | 705.88  | 15.03588 | 2 M.AK+14.0 chrX@7037    | 1.77E-10 | 0.005186 |
| 31May2011- | 11336 | 1030.04 | 4.184679 | 2 R.SSNRFCG chr3@3471    | 5.19E-11 | 6.18E-04 |
| 31Mar2011  | 4499  | 523.8   | -21.3645 | 2 R.ARLSMSL chr2@4365    | 1.32E-10 | 0.006527 |
| 29Nov2011  | 17490 | 721.33  | 2.628948 | 3 _..M+15.99 Splice@chr  | 2.65E-10 | 0.005479 |
| 29Nov2011  | 10110 | 1121.07 | -4.44216 | 2 _..WGYCRG chr3@2974    | 1.02E-10 | 0.001486 |
| 8Mar2011-  | 19050 | 888.92  | 9.389624 | 2 R.M+15.99 Splice@chr   | 8.26E-11 | 0.002087 |
| 8Mar2011-  | 6465  | 772.38  | -10.2071 | 2 K.IKLEEM+ Splice@chr   | 1.20E-10 | 0.003455 |
| 29Nov2011  | 16856 | 972.52  | -15.4802 | 3 R.SK+14.01 chr5@2939   | 1.37E-10 | 0.002964 |
| 8Mar2011-  | 6437  | 414.75  | -27.933  | 4 _..KAEEK+14 Splice@chr | 4.99E-11 | 0.001185 |
| 31May2011- | 3522  | 544.26  | -1.12351 | 2 _..M+15.99 chr5@9998   | 9.45E-11 | 0.001974 |
| 29Nov2011  | 593   | 720.4   | -22.6525 | 2 R.RHPIAIF chr3@3614    | 1.32E-10 | 0.005542 |
| 29Nov2011  | 11438 | 703.62  | 11.37996 | 4 K.DAK+14.0 chr2@9161   | 3.47E-10 | 0.00933  |
| 31May2011- | 3089  | 618.28  | 12.65665 | 2 A.CYSFTTT/ Splice@chr  | 8.65E-12 | 0        |
| 31May2011- | 3462  | 618.28  | 12.65665 | 2 A.CYSFTTT/ Splice@chr  | 1.26E-11 | 4.20E-04 |
| 31May2011- | 2092  | 618.28  | 12.65665 | 2 A.CYSFTTT/ Splice@chr  | 1.11E-11 | 0        |
| 31May2011- | 2064  | 618.28  | 12.65665 | 2 A.CYSFTTT/ Splice@chr  | 3.41E-12 | 0        |
| 31May2011- | 2558  | 618.28  | 12.65665 | 2 A.CYSFTTT/ Splice@chr  | 1.44E-12 | 0        |
| 31May2011- | 3988  | 618.28  | 12.65665 | 2 A.CYSFTTT/ Splice@chr  | 1.21E-11 | 3.14E-04 |
| 29Nov2011  | 13171 | 942.5   | 28.61162 | 3 K.KVRAKEV chrX@6396    | 2.49E-10 | 0.008344 |
| 31Mar2011  | 5229  | 548.27  | 11.71907 | 3 _..VSGATSS Splice@chr  | 3.79E-10 | 0.007818 |
| 31Mar2011  | 12112 | 973.13  | 17.07794 | 3 _..AVPFVPI/ Splice@chr | 3.95E-10 | 0.005571 |
| 29Nov2011  | 17875 | 706.89  | 18.59064 | 2 K.LIEELAM- Splice@chr  | 3.65E-10 | 0.007526 |
| 29Nov2011  | 22787 | 706.89  | 18.59064 | 2 K.LIEELAM- Splice@chr  | 1.29E-10 | 0.002659 |
| 8Mar2011-  | 1994  | 403.23  | -3.11197 | 2 K.RAGMTLI chr5@1057    | 1.15E-10 | 0.005006 |
| 8Mar2011-  | 14375 | 789.9   | 3.945793 | 2 K.FFFFFEK+ Splice@chr  | 4.79E-10 | 0.009388 |
| 29Nov2011  | 14458 | 787.4   | -3.02694 | 1 R.DVVCVVF chr3@6356    | 2.94E-11 | 9.74E-04 |
| 31Mar2011  | 9308  | 965.46  | -28.0886 | 4 R.NIFFFLK+ chr3@1101   | 3.31E-10 | 0.004153 |
| 31Mar2011  | 6854  | 864.9   | 9.891288 | 2 _..TDETKDC Splice@chr  | 4.47E-10 | 0.009392 |
| 31Mar2011  | 10294 | 963.18  | -14.446  | 3 K.TMFYLK+ chr4@5195    | 7.19E-10 | 0.007084 |
| 29Nov2011  | 9183  | 1184.55 | -19.9905 | 2 R.TIAKHLS/ chr2@7390   | 6.01E-12 | 3.75E-04 |
| 31Mar2011  | 10492 | 487.99  | -24.6274 | 4 R.ATGVLVF chr5@1997    | 4.66E-10 | 0.008383 |
| 8Mar2011-  | 20986 | 888.93  | -22.1793 | 2 _..QLEWRS\ chrX@1697   | 4.97E-10 | 0.00989  |
| 29Nov2011  | 16795 | 1174.64 | -15.9772 | 1 E.QMIELGE chr2@1156    | 3.57E-10 | 0.009139 |
| 31Mar2011  | 7606  | 683.43  | -4.38249 | 2 N.LILDDLPL chr1@3992   | 6.27E-10 | 0.007747 |
| 8Mar2011-  | 15095 | 621.59  | 19.90088 | 4 _..ITTEKKGt chrX@8696  | 1.56E-10 | 0.003497 |
| 29Nov2011  | 15265 | 1104.6  | 16.24734 | 3 K.MDSQEK chr1@2455     | 2.38E-10 | 0.006228 |
| 31Mar2011  | 10854 | 1104.59 | 7.248035 | 3 K.MDSQEK chr1@2455     | 2.01E-10 | 0.004899 |
| 8Mar2011-  | 11185 | 649.81  | -3.76293 | 2 N.FENGQF/ chr2@2590    | 8.42E-11 | 0.002563 |
| 31May2011- | 9635  | 868.96  | 29.11369 | 2 K.KNFLNFS chr2@5637    | 2.11E-10 | 0.00513  |
| 31May2011- | 4993  | 660.84  | -12.4491 | 2 R.M+15.99 Splice@chr   | 5.80E-11 | 0.001549 |
| 8Mar2011-  | 5407  | 462.25  | 15.3693  | 2 K.SFPGGKS chr2@1135    | 9.83E-12 | 1.24E-04 |

|           |       |         |          |                         |          |          |
|-----------|-------|---------|----------|-------------------------|----------|----------|
| 8Mar2011- | 2715  | 462.25  | 15.3693  | 2 K.SFPGGKS chr2@1135   | 1.06E-11 | 1.83E-04 |
| 8Mar2011- | 3709  | 462.25  | 15.3693  | 2 K.SFPGGKS chr2@1135   | 1.84E-10 | 0.004774 |
| 8Mar2011- | 3758  | 462.25  | 15.3693  | 2 K.SFPGGKS chr2@1135   | 1.53E-11 | 2.71E-04 |
| 8Mar2011- | 4699  | 462.25  | 15.3693  | 2 K.SFPGGKS chr2@1135   | 5.95E-11 | 0.001697 |
| 8Mar2011- | 17985 | 712.41  | 23.11516 | 1 K.SALGAHR chr5@1940   | 3.49E-10 | 0.006814 |
| 31Mar2011 | 3256  | 453.28  | 6.889289 | 3 K.NLILSGK+ chrX@9440  | 4.53E-10 | 0.00798  |
| 31Mar2011 | 2456  | 453.28  | 6.889289 | 3 K.NLILSGK+ chrX@9440  | 3.01E-11 | 5.31E-04 |
| 29Nov2011 | 25628 | 1312.14 | -28.3025 | 2 R.RRSCCLH chrX@4917   | 1.74E-10 | 0.004633 |
| 29Nov2011 | 4003  | 438.26  | -18.3741 | 2 K.VTLITAEK chr1@5545  | 2.94E-10 | 0.006452 |
| 31May2011 | 1395  | 408.2   | -10.8671 | 2 R.NGDKPEF chr5@6129   | 1.06E-10 | 0.003709 |
| 31Mar2011 | 8152  | 707.87  | -15.2493 | 2 K.QRYRGK1 chr4@1561   | 6.38E-11 | 9.73E-04 |
| 31Mar2011 | 12948 | 895.47  | -9.98814 | 3 M.CKKCAKI Splice@chr  | 4.48E-10 | 0.006811 |
| 31Mar2011 | 6695  | 593.02  | 9.003956 | 3 R.VIRM+15 chr1@1057   | 1.81E-10 | 0.001935 |
| 31Mar2011 | 8047  | 593.03  | 25.98088 | 3 R.VIRM+15 chr1@1057   | 3.82E-10 | 0.006516 |
| 31Mar2011 | 7358  | 593.02  | 9.072689 | 3 R.VIRM+15 chr1@1057   | 2.90E-10 | 0.004077 |
| 31Mar2011 | 3244  | 665.96  | 13.76851 | 2 K.INKKVAK chr3@8405   | 5.12E-10 | 0.007401 |
| 8Mar2011- | 17911 | 862.46  | 6.558869 | 2 K.NRK+14.1 Splice@chr | 3.92E-10 | 0.008731 |
| 29Nov2011 | 23933 | 1053.06 | 24.06043 | 2 K.YAVVSCR chr4@1259   | 3.15E-10 | 0.00801  |
| 31Mar2011 | 2500  | 722.42  | 14.77557 | 2 R.KM+15.9 chr2@3384   | 3.14E-10 | 0.004217 |
| 29Nov2011 | 9491  | 672.85  | 16.32117 | 2 K.ILCFNVD+ chr3@8368  | 7.13E-11 | 0.003287 |
| 8Mar2011- | 556   | 501.07  | 8.971133 | 4 R.KKLMMK chr5@1910    | 3.31E-10 | 0.009129 |
| 8Mar2011- | 131   | 501.07  | 8.971133 | 4 R.KKLMMK chr5@1910    | 2.88E-10 | 0.009231 |
| 29Nov2011 | 16486 | 584.7   | -12.6143 | 5 K.IKKNYDSI chr4@1682  | 1.55E-10 | 0.006432 |
| 31Mar2011 | 1080  | 767.01  | 15.05977 | 2 _ELK+14.0 chr1@5437   | 3.18E-10 | 0.005805 |
| 8Mar2011- | 15892 | 964.98  | -6.83811 | 2 R.M+15.99 chr5@1103   | 1.47E-10 | 0.003552 |
| 8Mar2011- | 16576 | 965.49  | 1.805615 | 2 R.M+15.99 chr5@1103   | 1.80E-10 | 0.005433 |
| 29Nov2011 | 8608  | 588.85  | 26.96923 | 2 R.KNMDKK chr2@1029    | 2.09E-10 | 0.008128 |
| 29Nov2011 | 2401  | 428.91  | 12.26703 | 3 _IVSK+14.1 chr4@1408  | 2.88E-11 | 3.80E-04 |
| 31May2011 | 1556  | 674.35  | -13.9226 | 2 K.RERITACF Splice@chr | 6.24E-11 | 0.002366 |
| 31May2011 | 3351  | 578.3   | -23.5184 | 3 R.KFPKPAT. chr1@6377  | 1.33E-10 | 0.002579 |
| 31May2011 | 2931  | 577.97  | -15.7973 | 3 R.KFPKPAT. chr1@6377  | 5.02E-10 | 0.009291 |
| 8Mar2011- | 5962  | 687.38  | -25.6712 | 2 P.EIFPIK+1+ chr4@5910 | 3.57E-10 | 0.009229 |
| 8Mar2011- | 20913 | 822.45  | -8.5858  | 2 K.SK+14.01 chr3@9428  | 1.31E-10 | 0.002335 |
| 31Mar2011 | 5583  | 716.39  | 21.33002 | 2 S.FEIANLNC chr1@2809  | 1.29E-10 | 0.001602 |
| 8Mar2011- | 6771  | 734.43  | 10.70263 | 2 L.TEQSVFK+ chr5@2036  | 4.39E-10 | 0.00851  |
| 8Mar2011- | 7179  | 734.43  | 10.70263 | 2 L.TEQSVFK+ chr5@2036  | 2.63E-10 | 0.004287 |
| 31May2011 | 8081  | 679.85  | -13.8461 | 2 _FFDFSAA+ Splice@chr  | 2.50E-10 | 0.008655 |
| 31Mar2011 | 10498 | 821.46  | 9.596672 | 2 _SERYSNLI Splice@chr  | 3.62E-10 | 0.006675 |
| 31Mar2011 | 964   | 593.03  | 1.718271 | 3 K.KSKKSK+ chr3@1172   | 4.83E-10 | 0.007847 |
| 31Mar2011 | 888   | 593.03  | 1.718271 | 3 K.KSKKSK+ chr3@1172   | 2.88E-10 | 0.003638 |
| 31Mar2011 | 833   | 593.03  | 1.718271 | 3 K.KSKKSK+ chr3@1172   | 6.60E-10 | 0.008215 |
| 31Mar2011 | 5981  | 555.31  | -12.5069 | 2 R.EAQILNR chr5@1497   | 2.64E-11 | 5.76E-04 |
| 8Mar2011- | 21538 | 929.01  | -26.3075 | 2 I.RWSLSISV Splice@chr | 3.07E-11 | 0.001334 |
| 31Mar2011 | 9389  | 688.92  | -4.74868 | 2 R.EIWALVII chr1@1344  | 3.84E-10 | 0.005619 |
| 31Mar2011 | 9194  | 688.92  | -4.74868 | 2 R.EIWALVII chr1@1344  | 3.13E-10 | 0.004399 |
| 29Nov2011 | 24840 | 1187.61 | -16.3778 | 3 _KWM+15 Splice@chr    | 1.28E-10 | 0.003375 |
| 31May2011 | 10880 | 880.79  | -7.00871 | 3 R.KPMEKVI Splice@chr  | 2.29E-10 | 0.00591  |

|           |       |         |          |                         |          |          |
|-----------|-------|---------|----------|-------------------------|----------|----------|
| 29Nov2011 | 8509  | 1026.82 | -12.1211 | 3 K.WM+15.5 chr3@7034   | 1.64E-10 | 0.006745 |
| 29Nov2011 | 8589  | 1026.82 | -12.1211 | 3 K.WM+15.5 chr3@7034   | 2.41E-10 | 0.008444 |
| 31May2011 | 7946  | 816.94  | -22.2912 | 2 _SKKFLGRI Splice@chr  | 3.04E-10 | 0.004795 |
| 31May2011 | 5782  | 444.77  | -2.0631  | 2 R.VTLMVGI chrX@9488   | 3.47E-10 | 0.00628  |
| 31May2011 | 5204  | 444.77  | -2.0631  | 2 R.VTLMVGI chrX@9488   | 2.75E-11 | 0.001009 |
| 31May2011 | 7413  | 444.77  | -2.0631  | 2 R.VTLMVGI chrX@9488   | 4.04E-10 | 0.009735 |
| 31May2011 | 6854  | 444.77  | -2.0631  | 2 R.VTLMVGI chrX@9488   | 3.74E-10 | 0.007026 |
| 31May2011 | 6727  | 444.77  | -2.0631  | 2 R.VTLMVGI chrX@9488   | 3.74E-10 | 0.008076 |
| 8Mar2011- | 16886 | 791.41  | 0.967227 | 2 K.QENLQIA chr2@1374   | 4.16E-10 | 0.008585 |
| 8Mar2011- | 4713  | 570.3   | 28.27806 | 2 R.EAALQM Splice@chr   | 8.77E-11 | 0.003883 |
| 31Mar2011 | 3190  | 577.28  | -23.0887 | 2 R.SLKFANG chr5@1260   | 3.67E-10 | 0.004613 |
| 31Mar2011 | 10712 | 1012.48 | 8.337781 | 1 R.RCVEEYR chr1@8491   | 2.61E-10 | 0.007254 |
| 8Mar2011- | 4511  | 460.24  | -21.8627 | 2 K.VIEGGVN chr5@8577   | 1.49E-10 | 0.003726 |
| 8Mar2011- | 5449  | 460.24  | -21.8627 | 2 K.VIEGGVN chr5@8577   | 2.43E-10 | 0.006307 |
| 8Mar2011- | 14266 | 662.09  | -12.9989 | 4 R.STDIWRS chrX@1748   | 9.31E-11 | 0.002013 |
| 8Mar2011- | 14318 | 662.09  | -12.9989 | 4 R.STDIWRS chrX@1748   | 4.56E-10 | 0.009182 |
| 8Mar2011- | 16388 | 662.09  | -12.9989 | 4 R.STDIWRS chrX@1748   | 1.07E-10 | 0.001828 |
| 8Mar2011- | 14362 | 662.09  | -12.9989 | 4 R.STDIWRS chrX@1748   | 2.55E-11 | 3.86E-04 |
| 31Mar2011 | 6541  | 616.36  | -4.36423 | 2 K.FYIRARLH chr1@9196  | 6.04E-10 | 0.007012 |
| 31Mar2011 | 9637  | 1031.5  | -16.5613 | 2 M.PM+15.5 chr2@1421   | 2.77E-10 | 0.007006 |
| 31May2011 | 7363  | 866.47  | -19.4388 | 2 S.SRVSGGT chr5@9424   | 3.59E-10 | 0.009264 |
| 31May2011 | 8955  | 966.02  | 27.49745 | 2 _EHVYQF chrX@1638     | 3.05E-10 | 0.007974 |
| 8Mar2011- | 1467  | 546.29  | -2.85495 | 2 R.EKLINCW chr2@1086   | 7.91E-11 | 0.001383 |
| 29Nov2011 | 1258  | 540.34  | 19.31548 | 2 K.KMMLAT Splice@chr   | 1.02E-10 | 0.002575 |
| 8Mar2011- | 14407 | 633.87  | -0.09644 | 2 K.YEKIAKH chr3@2565   | 3.44E-11 | 8.26E-04 |
| 8Mar2011- | 8950  | 741.35  | -2.14348 | 2 R.ACTMISN chr1@3451   | 2.06E-10 | 0.007791 |
| 31May2011 | 6301  | 961.96  | -17.5299 | 2 R.HFFCRCA chr4@3028   | 4.60E-10 | 0.00951  |
| 8Mar2011- | 5356  | 804.39  | -28.6409 | 2 _EK+14.01 chr5@1317   | 3.22E-10 | 0.009887 |
| 31Mar2011 | 3353  | 408.23  | -10.8485 | 3 K.SLSLSNVI Splice@chr | 7.24E-10 | 0.00983  |
| 8Mar2011- | 16965 | 895.42  | -14.6715 | 2 Y.FSSK+14. chrX@4446  | 3.61E-10 | 0.009636 |
| 31May2011 | 4104  | 660.34  | -19.0359 | 2 R.NESRTAK chrX@1381   | 2.10E-10 | 0.003497 |
| 31May2011 | 3541  | 660.35  | -3.93557 | 2 R.NESRTAK chrX@1381   | 3.28E-10 | 0.007338 |
| 31May2011 | 3572  | 660.35  | -3.93557 | 2 R.NESRTAK chrX@1381   | 3.97E-10 | 0.008316 |
| 31May2011 | 3385  | 660.35  | -3.93557 | 2 R.NESRTAK chrX@1381   | 7.78E-11 | 0.001834 |
| 31May2011 | 3425  | 660.35  | -3.93557 | 2 R.NESRTAK chrX@1381   | 8.91E-11 | 0.003032 |
| 31Mar2011 | 10030 | 856.42  | -27.9691 | 3 R.NLCREKP chrX@1402   | 2.38E-10 | 0.003811 |
| 31May2011 | 2340  | 456.25  | -15.4851 | 2 _RHTPSSV chr4@1715    | 8.61E-11 | 0.004232 |
| 8Mar2011- | 15829 | 848.81  | 3.071677 | 3 K.VAK+14.0 chr3@1057  | 3.79E-10 | 0.007761 |
| 31Mar2011 | 3512  | 628.87  | 28.58087 | 2 K.KSNREVE chr4@1484   | 4.07E-10 | 0.005748 |
| 8Mar2011- | 21158 | 1064.1  | -11.573  | 2 R.CFRRRAS chr3@1165   | 1.24E-10 | 0.001828 |
| 31Mar2011 | 15942 | 1023.06 | -17.8333 | 2 K.KILYAK+1 chr5@1266  | 3.50E-10 | 0.006675 |
| 8Mar2011- | 11054 | 629     | -3.79131 | 3 K.FVFVRGC Splice@chr  | 1.86E-10 | 0.005284 |
| 31May2011 | 8625  | 808.41  | -27.4936 | 2 T.FNENFET chr4@5957   | 3.04E-10 | 0.009319 |
| 31May2011 | 10021 | 808.41  | -27.4936 | 2 T.FNENFET chr4@5957   | 1.68E-10 | 0.004568 |
| 31May2011 | 7103  | 808.42  | -15.0887 | 2 T.FNENFET chr4@5957   | 3.70E-10 | 0.007338 |
| 31May2011 | 9126  | 808.42  | -15.0887 | 2 T.FNENFET chr4@5957   | 6.68E-11 | 0.001491 |
| 31May2011 | 10612 | 808.41  | -27.4936 | 2 T.FNENFET chr4@5957   | 2.47E-10 | 0.006919 |

|           |       |         |          |                         |          |          |
|-----------|-------|---------|----------|-------------------------|----------|----------|
| 31May2011 | 10568 | 808.42  | -15.0887 | 2 T.FNENFET chr4@5957   | 1.48E-10 | 0.004977 |
| 31May2011 | 4493  | 737.02  | 29.52282 | 3 K.DLYANTV Splice@chr  | 2.77E-10 | 0.007624 |
| 31May2011 | 3806  | 737.35  | 23.35939 | 3 K.DLYANTV Splice@chr  | 3.82E-10 | 0.00134  |
| 29Nov2011 | 20143 | 1176.25 | 3.065603 | 3 R.LAGRCQF Splice@chr  | 1.46E-10 | 0.003336 |
| 31Mar2011 | 7909  | 605.34  | -20.5793 | 3 K.TVPHCHN chr3@1064   | 2.64E-10 | 0.003998 |
| 31May2011 | 13909 | 966.85  | -9.67115 | 3 _SGRARGF Splice@chr   | 3.40E-10 | 0.009342 |
| 31Mar2011 | 4619  | 534.27  | -13.353  | 3 _IYRTQNYI chr1@1025   | 1.39E-10 | 0.002026 |
| 8Mar2011- | 18019 | 844.46  | -5.82742 | 2 K.ECRGGGI chr5@8575   | 5.37E-12 | 3.37E-04 |
| 29Nov2011 | 9187  | 724.39  | 24.02332 | 2 R.QEENWR chr4@5095    | 7.71E-11 | 0.003526 |
| 29Nov2011 | 9242  | 724.39  | 24.02332 | 2 R.QEENWR chr4@5095    | 1.25E-10 | 0.004661 |
| 31Mar2011 | 13817 | 897.44  | -25.8723 | 2 K.KSDKYSN chrX@2086   | 1.24E-10 | 0.003138 |
| 8Mar2011- | 6205  | 652.35  | -13.643  | 2 R.RSKQK+1 Splice@chr  | 1.33E-10 | 0.003604 |
| 29Nov2011 | 11342 | 942.41  | -8.6445  | 3 ?.EDRISYDI Splice@chr | 2.19E-10 | 0.006046 |
| 29Nov2011 | 8455  | 942.4   | -19.1908 | 3 ?.EDRISYDI Splice@chr | 1.27E-10 | 0.002675 |
| 31Mar2011 | 6604  | 976.98  | 20.49318 | 2 K.RDDQRN chr3@5620    | 5.18E-10 | 0.007699 |
| 31Mar2011 | 1849  | 659.84  | 10.56123 | 2 K.KRDVSW chr1@6697    | 5.54E-10 | 0.008816 |
| 8Mar2011- | 2420  | 996.5   | 17.65803 | 1 _FGVSGDI Splice@chr   | 2.71E-10 | 0.007353 |
| 8Mar2011- | 14722 | 838.91  | -17.3818 | 2 _FKFTEFCI chr5@8221   | 1.19E-10 | 0.002479 |
| 31Mar2011 | 12523 | 893.97  | 0.683514 | 2 R.HPCVQSI chrX@2879   | 6.43E-10 | 0.008095 |
| 31Mar2011 | 12640 | 816.73  | -28.9309 | 3 K.VELLNSCI chr5@1125  | 2.50E-11 | 6.40E-04 |
| 8Mar2011- | 14708 | 858.48  | 16.79884 | 2 R.TGISWRA Splice@chr  | 3.44E-10 | 0.007894 |
| 31Mar2011 | 6699  | 757.46  | 27.27264 | 1 R.MPAVLAI chrX@3005   | 3.19E-10 | 0.005805 |
| 8Mar2011- | 2520  | 552.8   | -19.337  | 4 R.QRRGRT/ chrX@1296   | 2.58E-10 | 0.005763 |
| 29Nov2011 | 4863  | 568.83  | 13.50399 | 2 _PNSAAGF Splice@chr   | 2.05E-11 | 5.07E-04 |
| 8Mar2011- | 16355 | 968.46  | 13.8365  | 4 R.IEDFTNLI Splice@chr | 9.55E-11 | 0.002989 |
| 31May2011 | 7900  | 934.47  | -21.1621 | 2 K.YQCNK+1 Splice@chr  | 4.76E-10 | 0.007901 |
| 29Nov2011 | 18450 | 700.4   | 15.62987 | 3 K.K+14.016 chr1@4751  | 2.40E-10 | 0.004486 |
| 8Mar2011- | 6813  | 1091.55 | -1.67903 | 1 K.EKNSNIC chr4@4959   | 1.12E-11 | 2.87E-04 |
| 29Nov2011 | 12679 | 879.48  | -14.5627 | 2 Y.LSCIVAQI chrX@6995  | 3.69E-10 | 0.008864 |
| 29Nov2011 | 16300 | 879.48  | -14.5627 | 2 Y.LSCIVAQI chrX@6995  | 2.10E-10 | 0.004018 |
| 29Nov2011 | 10628 | 879.48  | -14.5627 | 2 Y.LSCIVAQI chrX@6995  | 1.57E-10 | 0.005682 |
| 8Mar2011- | 8967  | 1073.52 | 14.56881 | 2 R.WRMSEI chr2@1215    | 2.30E-10 | 0.006875 |
| 8Mar2011- | 18127 | 641.31  | -0.8092  | 2 K.K+14.016 chr5@1534  | 4.66E-10 | 0.009504 |
| 8Mar2011- | 1384  | 401.72  | -22.7967 | 2 _IGGGSSV chr2@4942    | 2.07E-10 | 0.004214 |
| 8Mar2011- | 13243 | 660.39  | 19.06858 | 2 _IM+15.95 chr2@1701   | 3.03E-10 | 0.007041 |
| 8Mar2011- | 20674 | 818.41  | -16.3084 | 3 K.EFKTLYNI chrX@5286  | 3.09E-10 | 0.008265 |
| 8Mar2011- | 5024  | 572.33  | -4.0078  | 2 K.SK+14.01 chr1@1385  | 1.84E-11 | 3.86E-04 |
| 8Mar2011- | 965   | 434.22  | -13.2435 | 2 R.TTYGNRF chrX@3791   | 2.08E-10 | 0.00578  |
| 8Mar2011- | 9463  | 634.4   | 24.83529 | 2 R.QKLTIKFF chr3@2270  | 4.63E-10 | 0.008184 |
| 8Mar2011- | 7414  | 587.38  | 0.783171 | 2 K.SK+14.01 chr4@6325  | 3.31E-10 | 0.007169 |
| 29Nov2011 | 11543 | 1114.92 | -7.21595 | 3 K.KVKKAPV chr5@6972   | 6.68E-11 | 0.002659 |
| 8Mar2011- | 16887 | 893.47  | 2.803983 | 1 K.GGFIWW Splice@chr   | 1.08E-10 | 0.002379 |
| 29Nov2011 | 4340  | 725.87  | -11.1629 | 2 G.DGLDGTI Splice@chr  | 2.14E-10 | 0.008655 |
| 29Nov2011 | 4349  | 725.87  | -11.1629 | 2 G.DGLDGTI Splice@chr  | 1.01E-10 | 0.004612 |
| 31Mar2011 | 5967  | 1013.03 | 10.5305  | 2 K.TYHNQM chr2@1045    | 5.08E-10 | 0.00879  |
| 31Mar2011 | 4131  | 832.44  | 17.8142  | 2 K.EIWLK+1 chr2@2062   | 1.38E-10 | 0.001676 |
| 31Mar2011 | 7295  | 815.97  | 27.26188 | 2 K.EEEKNKE chr2@1269   | 6.06E-10 | 0.009634 |

|           |       |         |          |                         |          |          |
|-----------|-------|---------|----------|-------------------------|----------|----------|
| 29Nov2011 | 9657  | 926.79  | -18.2676 | 3 _ .NISFNFLK chr1@1490 | 9.33E-11 | 0.002817 |
| 29Nov2011 | 8752  | 926.79  | -18.2676 | 3 _ .NISFNFLK chr1@1490 | 2.55E-10 | 0.004734 |
| 29Nov2011 | 10085 | 926.46  | -13.366  | 3 _ .NISFNFLK chr1@1490 | 3.81E-10 | 0.007515 |
| 29Nov2011 | 9831  | 926.79  | -18.2676 | 3 _ .NISFNFLK chr1@1490 | 2.14E-10 | 0.004655 |
| 29Nov2011 | 17790 | 785.43  | 10.39564 | 2 K.QFVDFQ\$ chrX@8367  | 2.34E-10 | 0.005237 |
| 31Mar2011 | 5774  | 567.31  | 16.88446 | 2 R.M+15.99 chr1@6900   | 4.09E-10 | 0.005748 |
| 31Mar2011 | 5431  | 478.28  | 20.58964 | 2 K.VISVTGS\$ chr3@6418 | 7.84E-11 | 0.00221  |
| 31Mar2011 | 1035  | 423.75  | -1.73255 | 2 K.ITIDSAVK Splice@chr | 4.39E-10 | 0.006502 |
| 8Mar2011- | 11172 | 933.4   | -28.0819 | 2 S.SPEVPEN Splice@chr  | 1.55E-12 | 0        |
| 8Mar2011- | 11394 | 933.41  | -17.4121 | 2 S.SPEVPEN Splice@chr  | 8.03E-12 | 4.17E-04 |
| 31Mar2011 | 13262 | 1077.56 | -25.7651 | 3 K.IQKDGKS chr5@1825   | 7.41E-11 | 0.001063 |
| 31Mar2011 | 8244  | 815.97  | 1.572761 | 2 K.YHRKKKP chr5@1178   | 6.93E-10 | 0.009095 |
| 31Mar2011 | 11996 | 956.58  | 11.06399 | 1 R.GGPTRRF chr5@7846   | 5.26E-12 | 0        |
| 31Mar2011 | 7644  | 616.32  | -12.2338 | 3 R.DASK+14 chr4@8356   | 2.85E-10 | 0.004215 |
| 29Nov2011 | 14132 | 915.51  | -0.76677 | 2 K.TFIIFNEFI chr3@5847 | 1.06E-10 | 0.002927 |
| 29Nov2011 | 11273 | 915.52  | 10.18482 | 2 K.TFIIFNEFI chr3@5847 | 3.88E-11 | 0.003466 |
| 29Nov2011 | 11977 | 915.51  | -0.76677 | 2 K.TFIIFNEFI chr3@5847 | 2.39E-10 | 0.008114 |
| 8Mar2011- | 19149 | 948.02  | 22.47445 | 2 K.RKREK+1 chrX@8886   | 1.89E-10 | 0.002824 |
| 31Mar2011 | 1201  | 452.26  | 12.17331 | 2 R.NSDRGVI chrX@1565   | 4.95E-11 | 7.26E-04 |
| 31Mar2011 | 1831  | 452.26  | 12.17331 | 2 R.NSDRGVI chrX@1565   | 9.98E-11 | 9.00E-04 |
| 31Mar2011 | 11891 | 670.37  | 25.62338 | 2 R.KK+14.01 chrX@1247  | 8.75E-11 | 0.001536 |
| 31Mar2011 | 11501 | 670.37  | 25.62338 | 2 R.KK+14.01 chrX@1247  | 6.09E-11 | 0.001357 |
| 8Mar2011- | 13783 | 776.91  | 4.190893 | 4 K.TCTCAKT chr5@1034   | 8.98E-11 | 0.002149 |
| 29Nov2011 | 4799  | 579.33  | -2.05792 | 2 K.LQLSGLPI chr5@4514  | 1.58E-10 | 0.005514 |
| 8Mar2011- | 11981 | 850.44  | -8.01514 | 2 _ .KANWQK chr2@1004   | 1.76E-10 | 0.004682 |
| 31May2011 | 8444  | 724.36  | 19.12609 | 3 _ .PGSQDPK Splice@chr | 3.41E-10 | 0.00628  |
| 31May2011 | 7809  | 724.36  | 19.12609 | 3 _ .PGSQDPK Splice@chr | 3.55E-10 | 0.009923 |
| 31May2011 | 6409  | 724.36  | 19.12609 | 3 _ .PGSQDPK Splice@chr | 1.10E-10 | 0.003465 |
| 31May2011 | 9724  | 724.69  | 12.96735 | 3 _ .PGSQDPK Splice@chr | 2.24E-10 | 0.004478 |
| 31May2011 | 9377  | 724.69  | 12.96735 | 3 _ .PGSQDPK Splice@chr | 3.20E-10 | 0.006637 |
| 31May2011 | 5533  | 724.69  | 12.96735 | 3 _ .PGSQDPK Splice@chr | 1.38E-10 | 0.00275  |
| 31May2011 | 6020  | 724.69  | 12.96735 | 3 _ .PGSQDPK Splice@chr | 3.90E-10 | 0.003802 |
| 31May2011 | 6020  | 724.69  | 12.96735 | 3 _ .PGSQDPK Splice@chr | 1.69E-10 | 0.003283 |
| 8Mar2011- | 14529 | 874.98  | -2.68901 | 2 R.WHFVGE chr1@1478    | 2.24E-10 | 0.005444 |
| 8Mar2011- | 15312 | 872.96  | 8.259866 | 2 _ .DYSEKLLK chr2@7530 | 3.03E-10 | 0.007994 |
| 29Nov2011 | 9961  | 712.36  | -28.1421 | 2 R.RALMIRN Splice@chr  | 3.42E-10 | 0.009805 |
| 29Nov2011 | 12201 | 1267.71 | -29.4879 | 1 R.RHRPPRF Splice@chr  | 1.73E-10 | 0.005433 |
| 8Mar2011- | 2313  | 444.59  | -7.79705 | 3 T.AAGLKSS chr1@5299   | 3.42E-10 | 0.009337 |
| 29Nov2011 | 19517 | 860.95  | -13.2723 | 4 K.RKMKTm chr2@1291    | 3.45E-10 | 0.009105 |
| 8Mar2011- | 9215  | 550.82  | 6.549687 | 2 K.PEIVSMIF chr5@1705  | 4.99E-10 | 0.009978 |
| 31Mar2011 | 8767  | 1033.52 | -15.4412 | 1 R.SESRPESL chr5@1861  | 2.68E-10 | 0.004507 |
| 31Mar2011 | 12165 | 922.5   | 4.275676 | 2 R.FFWRKNI chr2@1279   | 3.98E-11 | 4.79E-04 |
| 8Mar2011- | 12242 | 582.82  | -11.705  | 2 R.SFGVVG\$ chrX@9815  | 3.37E-10 | 0.007184 |
| 8Mar2011- | 11180 | 924.98  | -18.3394 | 2 R.IDGTTRE` chrX@6218  | 1.49E-10 | 0.003604 |
| 31Mar2011 | 6607  | 1016.61 | 24.90771 | 1 R.RRRWWF chrX@2609    | 5.86E-10 | 0.008564 |
| 29Nov2011 | 4490  | 587.36  | -15.469  | 2 K.KAEKKVR chr1@8677   | 6.05E-11 | 0.001657 |
| 29Nov2011 | 13482 | 864.43  | 28.41811 | 2 _ .NLFANW chrX@1151   | 2.64E-10 | 0.007251 |

|           |       |         |          |                           |          |          |
|-----------|-------|---------|----------|---------------------------|----------|----------|
| 29Nov2011 | 10325 | 864.43  | 28.41811 | 2 _._NLFANW chrX@1151     | 2.91E-10 | 0.007508 |
| 31May2011 | 1885  | 654.09  | 4.79236  | 4 _._SKERISILS Splice@chr | 5.65E-10 | 0.007849 |
| 31Mar2011 | 11084 | 974.79  | -24.0546 | 3 K.AVPFVPI\$ Splice@chr  | 1.44E-10 | 0.001983 |
| 31Mar2011 | 13071 | 974.79  | -24.0546 | 3 K.AVPFVPI\$ Splice@chr  | 1.71E-10 | 0.002266 |
| 29Nov2011 | 25775 | 1202.64 | -13.0837 | 2 _._MERERAI chr1@8777    | 3.94E-10 | 0.009408 |
| 31Mar2011 | 9596  | 547.28  | -2.73794 | 2 K.VRMCGS. chr4@2041     | 4.01E-10 | 0.006002 |
| 31Mar2011 | 9623  | 853.44  | -2.64944 | 3 K.M+15.99 Splice@chr    | 6.11E-10 | 0.009385 |
| 29Nov2011 | 13839 | 1231.61 | -24.7671 | 1 K.SEHLFLLI Splice@chr   | 7.64E-11 | 0.003403 |
| 8Mar2011- | 21568 | 767.43  | -20.3069 | 2 K.MKK+14. chrX@1015     | 1.91E-10 | 0.004649 |
| 29Nov2011 | 14455 | 1071.59 | -7.86748 | 1 R.QLAKLPN chrX@1475     | 1.90E-10 | 0.006846 |
| 8Mar2011- | 1400  | 439.25  | 2.785461 | 3 K.K+14.016 chrX@9995    | 6.04E-11 | 0.00151  |
| 29Nov2011 | 10174 | 763.07  | -16.2112 | 3 _._TAMGKEI Splice@chr   | 1.52E-10 | 0.006538 |
| 31Mar2011 | 4196  | 593.02  | 3.267829 | 3 K.EKNLSLTI chrX@8894    | 5.70E-10 | 0.008564 |
| 31Mar2011 | 8318  | 593.03  | 20.18548 | 3 K.EKNLSLTI chrX@8894    | 6.60E-10 | 0.007338 |
| 31Mar2011 | 7320  | 593.02  | 3.267829 | 3 K.EKNLSLTI chrX@8894    | 2.65E-10 | 0.003801 |
| 29Nov2011 | 8761  | 1152.61 | -22.2419 | 2 K.LFMERYYS Splice@chr   | 1.76E-10 | 0.006921 |
| 29Nov2011 | 4160  | 759.4   | -17.7558 | 2 R.CNLEKLN chr3@1222     | 2.70E-10 | 0.00786  |
| 29Nov2011 | 4107  | 759.4   | -17.7558 | 2 R.CNLEKLN chr3@1222     | 2.22E-10 | 0.005987 |
| 29Nov2011 | 4523  | 759.4   | -17.7558 | 2 R.CNLEKLN chr3@1222     | 1.74E-10 | 0.005336 |
| 31Mar2011 | 7687  | 516.31  | 20.84682 | 3 K.NLILVFW chr3@1355     | 2.00E-10 | 0.002706 |
| 29Nov2011 | 13962 | 1102.57 | -18.5965 | 2 K.SVSHWSI Splice@chr    | 1.39E-10 | 0.003467 |
| 31Mar2011 | 242   | 875.46  | -20.4715 | 1 _._DDRTIVR chr1@4252    | 3.21E-10 | 0.004554 |
| 29Nov2011 | 930   | 879.47  | -11.6833 | 1 R.SMSIATLI Splice@chr   | 1.22E-10 | 0.004994 |
| 31Mar2011 | 11342 | 975.99  | -17.0662 | 2 _._LHSNNER chr2@9634    | 2.12E-10 | 0.002658 |
| 29Nov2011 | 2258  | 473.74  | -29.2429 | 2 K.KNEEIWK chr3@3452     | 3.26E-10 | 0.009023 |
| 29Nov2011 | 22013 | 1189.14 | 3.212937 | 2 R.YM+15.9 chrX@4834     | 3.11E-10 | 0.008486 |
| 31Mar2011 | 4368  | 620.88  | -24.2887 | 2 S.QVPKVVK chr1@4221     | 3.07E-10 | 0.005455 |
| 31Mar2011 | 3258  | 620.89  | -8.12794 | 2 S.QVPKVVK chr1@4221     | 4.48E-10 | 0.00514  |
| 31Mar2011 | 2883  | 620.89  | -8.12794 | 2 S.QVPKVVK chr1@4221     | 6.12E-10 | 0.008689 |
| 31May2011 | 6063  | 666.35  | -25.3182 | 2 K.K+14.016 chr4@1357    | 2.98E-11 | 8.30E-04 |
| 8Mar2011- | 4329  | 548.29  | -28.4062 | 2 K.SLYLGLSV chr4@2632    | 3.76E-10 | 0.009636 |
| 31Mar2011 | 1275  | 517.95  | -13.0662 | 3 K.IQK+14.0 chrX@3650    | 4.28E-10 | 0.005506 |
| 8Mar2011- | 982   | 459.25  | -16.3982 | 2 R.KQVGMP chr4@1821      | 7.40E-11 | 0.001568 |
| 31May2011 | 7289  | 786.92  | 27.49295 | 2 K.GERRQAI Splice@chr    | 1.20E-10 | 0.003788 |
| 31Mar2011 | 6081  | 700.93  | 25.37665 | 2 R.FFQRKNK chr2@1498     | 6.12E-10 | 0.009634 |
| 8Mar2011- | 13174 | 751.37  | -1.85041 | 4 _._DSVFSTA chrX@1488    | 3.69E-10 | 0.007115 |
| 31May2011 | 10580 | 538.93  | 3.025733 | 3 R.FLENQTT Splice@chr    | 2.94E-10 | 0.008852 |
| 8Mar2011- | 15930 | 957.23  | 4.166544 | 4 _._RFRTYPG Splice@chr   | 4.32E-10 | 0.009199 |
| 31Mar2011 | 6254  | 593.03  | -14.6809 | 3 R.KVVAVIIN chrX@1537    | 2.23E-10 | 0.003519 |
| 29Nov2011 | 13803 | 528.6   | -24.0622 | 3 R.FLYRPQY chrX@1100     | 1.72E-10 | 0.003255 |
| 8Mar2011- | 10950 | 721.44  | -5.38196 | 2 K.K+14.016 chr5@1740    | 1.15E-10 | 0.003628 |
| 31Mar2011 | 4613  | 600.72  | 23.28645 | 5 K.LCYFLNI chr4@1644     | 6.39E-10 | 0.008677 |
| 31Mar2011 | 15486 | 1078.89 | -24.0719 | 3 K.YFLYAEIF chrX@9443    | 3.95E-12 | 2.07E-04 |
| 31Mar2011 | 13704 | 1078.89 | -24.0719 | 3 K.YFLYAEIF chrX@9443    | 7.55E-11 | 0.00213  |
| 31Mar2011 | 1681  | 477.72  | -17.7963 | 2 _._SSSLGSSS chr4@1042   | 2.35E-10 | 0.00394  |
| 31Mar2011 | 1588  | 477.72  | -17.7963 | 2 _._SSSLGSSS chr4@1042   | 5.87E-11 | 0.001357 |
| 31Mar2011 | 4364  | 785.4   | -0.03756 | 2 K.TLM+15.9 Splice@chr   | 5.87E-10 | 0.008564 |

|           |       |         |          |                         |          |          |
|-----------|-------|---------|----------|-------------------------|----------|----------|
| 31Mar2011 | 7732  | 785.4   | -0.03756 | 2 K.TLM+15.! Splice@chr | 4.46E-10 | 0.006816 |
| 31Mar2011 | 8990  | 785.4   | -0.03756 | 2 K.TLM+15.! Splice@chr | 5.36E-10 | 0.00928  |
| 31Mar2011 | 8936  | 785.4   | -0.03756 | 2 K.TLM+15.! Splice@chr | 2.37E-10 | 0.003519 |
| 31Mar2011 | 7163  | 785.4   | -0.03756 | 2 K.TLM+15.! Splice@chr | 2.31E-10 | 0.004206 |
| 31Mar2011 | 6808  | 478.79  | 20.24828 | 2 _LNNAGILi chr5@7449   | 3.19E-10 | 0.003039 |
| 8Mar2011- | 8435  | 464.75  | 21.61092 | 2 R.FEKAGGY chr5@1660   | 1.75E-10 | 0.004641 |
| 8Mar2011- | 7758  | 464.75  | 21.61092 | 2 R.FEKAGGY chr5@1660   | 4.60E-10 | 0.009634 |
| 31Mar2011 | 5140  | 1017.55 | 17.5926  | 2 K.SSCHLSK- Splice@chr | 7.76E-10 | 0.009635 |
| 31Mar2011 | 5578  | 1017.55 | 17.5926  | 2 K.SSCHLSK- Splice@chr | 3.74E-10 | 0.003935 |
| 31Mar2011 | 7750  | 675.34  | -29.325  | 3 R.QSKSTKG Splice@chr  | 3.85E-11 | 3.53E-04 |
| 31Mar2011 | 2115  | 579.04  | -0.60648 | 4 _PNFRDSY Splice@chr   | 6.06E-10 | 0.009322 |
| 31May2011 | 4546  | 602.84  | -2.07897 | 2 R.FPLKPKC chr5@1335   | 3.81E-10 | 0.008397 |
| 31Mar2011 | 11772 | 835.06  | 2.341736 | 3 R.KNCIEQF Splice@chr  | 3.20E-10 | 0.004205 |
| 29Nov2011 | 13353 | 534.97  | 14.93623 | 3 S.SDTLQISS Splice@chr | 3.03E-10 | 0.008039 |
| 8Mar2011- | 9521  | 800.41  | -17.6847 | 2 K.RRK+14.C chr1@1440  | 2.75E-10 | 0.00635  |
| 31Mar2011 | 11830 | 922     | 21.98249 | 2 _KFFCADQ Splice@chr   | 5.60E-10 | 0.009462 |
| 31Mar2011 | 4970  | 473.95  | -1.37658 | 3 R.TVK+14.C chr5@2064  | 3.11E-10 | 0.007746 |
| 8Mar2011- | 17219 | 981.01  | 21.90443 | 2 R.FQHFLQF chr3@1210   | 3.62E-10 | 0.009244 |
| 8Mar2011- | 18216 | 1070.1  | -23.1783 | 2 K.FWREVCi chr5@1859   | 1.40E-10 | 0.003444 |
| 8Mar2011- | 14999 | 861.65  | -28.5692 | 4 A.QRQYM+ Splice@chr   | 8.40E-12 | 5.54E-04 |
| 31May2011 | 2894  | 415.19  | -5.23136 | 2 K.SFDTTMk chr3@4555   | 1.38E-10 | 0.004991 |
| 29Nov2011 | 27925 | 1034.53 | -19.7241 | 1 R.RVRMWI chr5@4648    | 8.67E-12 | 4.95E-04 |
| 8Mar2011- | 9716  | 758.73  | -15.552  | 3 S.ELSVKEQI Splice@chr | 3.26E-10 | 0.00703  |
| 31Mar2011 | 13331 | 435.87  | -25.0762 | 3 _CKM+15. chr3@4615    | 5.29E-10 | 0.007595 |
| 31Mar2011 | 1787  | 893.49  | 10.73705 | 1 K.SSKNSSKI chr2@1284  | 5.73E-10 | 0.009579 |
| 31Mar2011 | 9665  | 791.42  | -4.32427 | 3 _NQNLIII chr4@8490    | 4.53E-10 | 0.008612 |
| 8Mar2011- | 3245  | 755.39  | 14.77708 | 2 _SMRLNGI chrX@7158    | 2.32E-10 | 0.003997 |
| 8Mar2011- | 1586  | 915.48  | -23.2262 | 1 K.QREIGGC chr1@2506   | 1.03E-10 | 0.002489 |
| 8Mar2011- | 1537  | 915.48  | -23.2262 | 1 K.QREIGGC chr1@2506   | 1.46E-10 | 0.003646 |
| 8Mar2011- | 1240  | 915.48  | -23.2262 | 1 K.QREIGGC chr1@2506   | 1.05E-10 | 0.002644 |
| 8Mar2011- | 1463  | 915.48  | -23.2262 | 1 K.QREIGGC chr1@2506   | 1.03E-10 | 0.002644 |
| 8Mar2011- | 3079  | 915.48  | -23.2262 | 1 K.QREIGGC chr1@2506   | 1.46E-10 | 0.003604 |
| 8Mar2011- | 2855  | 915.48  | -23.2262 | 1 K.QREIGGC chr1@2506   | 1.48E-10 | 0.004338 |
| 8Mar2011- | 20805 | 845.78  | -26.2985 | 3 K.NK+14.01 chr2@4471  | 3.46E-11 | 0.001595 |
| 8Mar2011- | 16856 | 845.78  | -26.2985 | 3 K.NK+14.01 chr2@4471  | 3.12E-10 | 0.008085 |
| 8Mar2011- | 7083  | 665.39  | -8.08428 | 2 K.KNVHFCL chr2@1331   | 3.19E-10 | 0.00781  |
| 29Nov2011 | 23963 | 1069.05 | 2.743052 | 2 R.CFLYLNL! Splice@chr | 8.16E-11 | 0.001643 |
| 8Mar2011- | 2336  | 744.44  | 22.98829 | 1 R.RGKGGG chrX@1248    | 2.77E-10 | 0.006803 |
| 31Mar2011 | 2185  | 417.24  | -6.94078 | 3 K.IRFGGLASS chrX@1767 | 5.19E-10 | 0.006681 |
| 31Mar2011 | 11438 | 699.34  | -2.01023 | 2 K.M+15.99 chr5@4152   | 4.37E-11 | 3.77E-04 |
| 8Mar2011- | 13402 | 644     | -19.4906 | 3 K.K+14.016 chr3@8874  | 4.68E-11 | 9.70E-04 |
| 8Mar2011- | 20466 | 850.46  | -20.9086 | 2 K.FSKFFK+1 chr5@1777  | 4.30E-10 | 0.008474 |
| 31Mar2011 | 3626  | 634.32  | -7.56964 | 2 _K+14.016 Splice@chr  | 5.36E-10 | 0.007916 |
| 8Mar2011- | 2091  | 450.25  | -17.4071 | 2 R.RSHVIMF chr5@1354   | 3.12E-10 | 0.006998 |
| 8Mar2011- | 20739 | 760.42  | -26.1518 | 1 _TEVVVGR chrX@1183    | 1.13E-10 | 0.003185 |
| 8Mar2011- | 10543 | 760.42  | -26.1518 | 1 _TEVVVGR chrX@1183    | 2.28E-10 | 0.004966 |
| 8Mar2011- | 19983 | 760.42  | -26.1518 | 1 _TEVVVGR chrX@1183    | 4.91E-10 | 0.008747 |

|           |       |         |          |                          |          |          |
|-----------|-------|---------|----------|--------------------------|----------|----------|
| 8Mar2011- | 20018 | 760.42  | -26.1518 | 1 _..TEVVVGR chrX@1183   | 1.13E-10 | 0.001828 |
| 8Mar2011- | 19939 | 760.42  | -26.1518 | 1 _..TEVVVGR chrX@1183   | 4.63E-10 | 0.008184 |
| 29Nov2011 | 18601 | 1233.59 | -27.1255 | 3 K.M+15.99 Splice@chr   | 1.33E-10 | 0.002658 |
| 8Mar2011- | 11970 | 1023.51 | -8.05835 | 1 _..SSSSRVG` chr3@1100  | 3.26E-10 | 0.007456 |
| 31May2011 | 7599  | 968.17  | -2.27186 | 3 K.LCSWNKI chr1@1074    | 2.31E-10 | 0.007186 |
| 31May2011 | 4757  | 1073.59 | 7.007905 | 1 K.YKTNKQY chr2@1018    | 1.22E-10 | 0.006584 |
| 8Mar2011- | 17045 | 680.71  | -14.1038 | 3 R.MKSK+14 chr1@5113    | 2.15E-10 | 0.00525  |
| 8Mar2011- | 3184  | 496.24  | 18.87821 | 2 K.M+15.99 chrX@7047    | 1.96E-10 | 0.008258 |
| 8Mar2011- | 18480 | 747.39  | 6.682262 | 3 S.ANIEFEEC Splice@chr  | 3.27E-10 | 0.00698  |
| 31May2011 | 11240 | 1070.89 | -3.70863 | 3 T.YPGVVLD Splice@chr   | 4.79E-17 | 0        |
| 8Mar2011- | 19159 | 1127.6  | -11.5708 | 2 K.HIDNKSE chr2@9359    | 2.60E-12 | 1.69E-04 |
| 8Mar2011- | 18885 | 870.03  | -22.4042 | 4 K.PKPKPKP chr3@1378    | 1.88E-10 | 0.003908 |
| 8Mar2011- | 8710  | 771.92  | 25.23494 | 2 K.YSCFLPQI Splice@chr  | 4.25E-11 | 0.001532 |
| 8Mar2011- | 12679 | 1101.58 | 19.22619 | 2 R.RFQK+14 Splice@chr   | 3.67E-10 | 0.009332 |
| 29Nov2011 | 2621  | 473.23  | -24.4278 | 2 K.EVEERQR chr4@1049    | 3.31E-10 | 0.008525 |
| 29Nov2011 | 19525 | 1061.54 | -24.8496 | 3 K.ICCK+14.1 Splice@chr | 1.52E-10 | 0.004137 |
| 29Nov2011 | 24759 | 1065.13 | 12.99873 | 2 D.YPVLGVK chr4@4489    | 3.49E-10 | 0.007499 |
| 31May2011 | 2299  | 577.97  | -27.4128 | 3 K.ELQLGKL' chr5@9467   | 3.70E-10 | 0.00939  |
| 31May2011 | 1097  | 577.97  | -27.4128 | 3 K.ELQLGKL' chr5@9467   | 1.67E-11 | 0        |
| 31May2011 | 4141  | 839.45  | 10.04594 | 2 K.IHTNITK+ chrX@1409   | 1.42E-10 | 0.002846 |
| 31May2011 | 4171  | 839.45  | 10.04594 | 2 K.IHTNITK+ chrX@1409   | 3.24E-10 | 0.009981 |
| 8Mar2011- | 12739 | 1047.53 | -8.8389  | 2 R.K+14.016 chr4@1049   | 1.34E-10 | 0.003332 |
| 31Mar2011 | 5523  | 971.96  | -4.87313 | 2 R.K+14.016 chr1@1084   | 6.30E-10 | 0.008393 |
| 31May2011 | 6534  | 686.37  | 8.690898 | 2 R.EEIKTGSS chr5@1481   | 8.59E-11 | 0.00205  |
| 31Mar2011 | 14055 | 550.63  | 20.33611 | 3 K.NSTFVEL' chr1@4717   | 2.68E-10 | 0.00727  |
| 31Mar2011 | 11031 | 1004.49 | -24.3094 | 2 R.RSLFHFS( chr2@6120   | 4.01E-10 | 0.004302 |
| 29Nov2011 | 938   | 678.29  | 2.883777 | 1 R.DGAEMR chrX@2149     | 2.09E-10 | 0.006888 |
| 29Nov2011 | 13346 | 833.46  | 0.733198 | 2 _..KK+14.01 chr5@1212  | 7.02E-11 | 0.001543 |
| 29Nov2011 | 11439 | 577.98  | -1.12837 | 3 _..VTCLAQL Splice@chr  | 1.88E-10 | 0.008477 |
| 31Mar2011 | 4263  | 900.48  | -12.7968 | 2 R.SRKYEIPA chr4@3264   | 3.26E-12 | 0        |
| 8Mar2011- | 9076  | 429.75  | -14.7339 | 2 R.IIGDVSVF Splice@chr  | 1.66E-10 | 0.004727 |
| 31May2011 | 5295  | 660.85  | -10.3599 | 2 K.KRK+14.0 chr3@1121   | 1.15E-10 | 0.003788 |
| 31May2011 | 2648  | 625.33  | 3.71498  | 2 R.YMHTGA chr2@8194     | 1.57E-10 | 0.005975 |
| 29Nov2011 | 3049  | 686.35  | 5.2153   | 2 K.FPNRSYD chr1@3248    | 2.48E-10 | 0.006513 |
| 29Nov2011 | 27396 | 1115.1  | -27.1725 | 2 R.TRCRRRT chr2@1169    | 3.89E-10 | 0.009408 |
| 29Nov2011 | 15440 | 712.87  | -29.2365 | 4 _..IRSSCCAl chr1@6099  | 2.71E-11 | 0.001527 |
| 29Nov2011 | 11077 | 742.38  | -19.519  | 3 K.LECFIKA Splice@chr   | 1.18E-10 | 0.003082 |
| 31Mar2011 | 3998  | 473.26  | 10.80563 | 2 K.KNLACPN chr5@5323    | 3.18E-10 | 0.005333 |
| 8Mar2011- | 9174  | 1036.84 | -28.9787 | 3 R.TRPIWDV chr2@3013    | 3.75E-10 | 0.009619 |
| 8Mar2011- | 361   | 420.23  | 7.873981 | 2 R.QYGASGI Splice@chr   | 3.48E-11 | 0.001136 |
| 29Nov2011 | 4002  | 661.84  | 11.69431 | 2 _..VGTTAGT chr3@1287   | 2.41E-10 | 0.006517 |
| 8Mar2011- | 12899 | 772.39  | 23.48467 | 5 K.NQKTYLL chr1@5143    | 1.82E-10 | 0.002824 |
| 8Mar2011- | 799   | 436.23  | 2.804789 | 2 R.RASSSAH chr2@1512    | 3.95E-10 | 0.008642 |
| 8Mar2011- | 4593  | 593.3   | 1.442689 | 2 H.PPDQQN Splice@chr    | 2.01E-10 | 0.005573 |
| 8Mar2011- | 4543  | 593.3   | 1.442689 | 2 H.PPDQQN Splice@chr    | 1.00E-10 | 0.003113 |
| 31Mar2011 | 4443  | 665.38  | -0.8718  | 2 K.LLEQLVLI' Splice@chr | 3.09E-10 | 0.004745 |
| 8Mar2011- | 5618  | 652.35  | 9.426525 | 2 K.NGGRDSI chr2@1006    | 3.89E-10 | 0.007739 |

|           |       |         |          |                          |          |          |
|-----------|-------|---------|----------|--------------------------|----------|----------|
| 8Mar2011- | 5005  | 758.42  | -9.66996 | 1 R.GVSRPSR chr4@3018    | 3.53E-10 | 0.007361 |
| 29Nov2011 | 18686 | 889.49  | -2.02646 | 2 V.QFFVKGC chr5@1737    | 2.77E-10 | 0.00628  |
| 8Mar2011- | 20654 | 1025.78 | 21.58178 | 4 K.M+15.99 chr4@9263    | 8.30E-11 | 0.001486 |
| 31May2011 | 7284  | 934.47  | 14.38508 | 2 K.VSK+14.0 Splice@chr  | 1.74E-10 | 0.004683 |
| 29Nov2011 | 9596  | 608.05  | -0.77866 | 4 K.VHSASNF chr5@5479    | 1.01E-10 | 0.004612 |
| 31May2011 | 8490  | 876.47  | 0.105863 | 2 R.KNRRKG( chrX@3685    | 3.49E-10 | 0.005882 |
| 29Nov2011 | 14525 | 1122.57 | 29.10219 | 2 R.KK+14.01 chr3@1089   | 3.30E-11 | 0.001011 |
| 31Mar2011 | 547   | 437.94  | 2.421303 | 3 _ .KIWQLKS chr2@6009   | 6.02E-10 | 0.009124 |
| 31Mar2011 | 4466  | 450.92  | 25.57058 | 3 R.SNIFSDV( chr5@1621   | 2.01E-10 | 0.003883 |
| 29Nov2011 | 7356  | 1008.49 | -21.4648 | 1 R.M+15.99 Splice@chr   | 1.93E-10 | 0.006117 |
| 29Nov2011 | 3819  | 843.96  | 10.61525 | 2 K.NQPCRVI chr2@1163    | 1.32E-10 | 0.00511  |
| 8Mar2011- | 19289 | 1086.54 | -21.0087 | 2 R.RCISEKFS chr4@4806   | 1.70E-10 | 0.003702 |
| 29Nov2011 | 3134  | 840.94  | -13.2682 | 2 _ .EQKKEVY chr5@1832   | 2.77E-10 | 0.006948 |
| 8Mar2011- | 2733  | 595.31  | 19.71889 | 2 _ .AGTVSGF chr5@3788   | 1.41E-10 | 0.003022 |
| 29Nov2011 | 139   | 807.39  | 27.58895 | 1 R.SQADETF chr4@1351    | 2.19E-10 | 0.006273 |
| 8Mar2011- | 1321  | 545.33  | 11.61833 | 2 K.GMAGKA chr5@1320     | 4.82E-11 | 0.001776 |
| 31May2011 | 2502  | 686.35  | -23.4217 | 2 K.VVMKQK chr5@7058     | 4.55E-10 | 0.008854 |
| 31May2011 | 2141  | 686.35  | -23.4217 | 2 K.VVMKQK chr5@7058     | 3.26E-10 | 0.009524 |
| 8Mar2011- | 1156  | 746.4   | -13.6079 | 1 R.RAGGGT( chr2@7665    | 3.15E-10 | 0.004951 |
| 29Nov2011 | 5503  | 456.27  | 25.47318 | 3 K.TQPPPKS chrX@1035    | 2.87E-10 | 0.007508 |
| 29Nov2011 | 7535  | 456.27  | 25.47318 | 3 K.TQPPPKS chrX@1035    | 1.55E-10 | 0.004454 |
| 31May2011 | 6305  | 782.89  | 7.259803 | 2 K.GASVVV( chr4@4386    | 2.78E-11 | 3.38E-04 |
| 31May2011 | 7280  | 783.4   | 17.91669 | 2 K.GASVVV( chr4@4386    | 7.53E-12 | 0        |
| 31May2011 | 4759  | 782.9   | 20.06204 | 2 K.GASVVV( chr4@4386    | 1.74E-10 | 0.003861 |
| 31May2011 | 4127  | 782.9   | 20.06204 | 2 K.GASVVV( chr4@4386    | 5.35E-12 | 0        |
| 31Mar2011 | 12595 | 1013.05 | 15.96093 | 2 K.LNILHSG( chr1@1370   | 1.97E-10 | 0.004657 |
| 31May2011 | 6597  | 581.32  | 14.09384 | 3 K.MRFYIILE Splice@chr  | 3.15E-10 | 0.00911  |
| 29Nov2011 | 19147 | 1081.53 | -15.7941 | 2 K.FNEYIKNI chr5@1395   | 3.43E-10 | 0.00933  |
| 31May2011 | 2282  | 576.29  | 25.14539 | 2 K.EKSESIED chr2@1314   | 3.05E-10 | 0.008906 |
| 29Nov2011 | 15766 | 739.07  | 3.418134 | 3 K.NTAVEITI chrX@1158   | 3.48E-10 | 0.009248 |
| 29Nov2011 | 1958  | 451.27  | 23.8582  | 2 _ .DNVILATI Splice@chr | 4.63E-10 | 0.009823 |
| 31Mar2011 | 6262  | 805.4   | -18.7989 | 3 K.FFQK+14 chr4@8528    | 3.81E-10 | 0.006924 |
| 8Mar2011- | 8913  | 424.26  | 4.766979 | 2 R.STVTGLLI Splice@chr  | 2.02E-10 | 0.007654 |
| 31Mar2011 | 5825  | 895.91  | -21.4153 | 2 K.IMK+14.( chr2@4906   | 1.00E-10 | 8.13E-04 |
| 8Mar2011- | 16090 | 826.19  | 25.98967 | 4 R.RSTK+14. chr1@1272   | 2.67E-10 | 0.00586  |
| 31Mar2011 | 6659  | 643.04  | 6.401124 | 3 _ .NIGLNID( chr1@1815  | 2.92E-10 | 0.003913 |
| 31May2011 | 6565  | 895.45  | -1.84243 | 2 R.KIECSMK chrX@5833    | 1.10E-11 | 8.30E-04 |
| 31May2011 | 6999  | 911.02  | 29.0261  | 2 R.LRKHVFE Splice@chr   | 5.71E-11 | 9.18E-04 |
| 31May2011 | 9625  | 1083.59 | -26.4975 | 2 V.IRLKVPIK chr3@3145   | 7.10E-11 | 0.001902 |
| 29Nov2011 | 12767 | 1090.22 | 22.63908 | 3 K.MK+14.0 chr1@1138    | 1.00E-10 | 0.004405 |
| 8Mar2011- | 18778 | 479.23  | 16.46445 | 2 _ .FRFGDCR chr4@1146   | 4.89E-10 | 0.009476 |
| 31Mar2011 | 5670  | 618.29  | -3.8562  | 2 K.WTEESGI chrX@1643    | 1.98E-10 | 0.003217 |
| 31Mar2011 | 11411 | 887.92  | 23.60499 | 2 K.QM+15.9 chrX@1515    | 1.09E-10 | 0.001406 |
| 8Mar2011- | 21258 | 940.46  | -25.4672 | 2 K.K+14.016 chr5@1632   | 1.99E-10 | 0.005078 |
| 8Mar2011- | 10201 | 575.33  | -21.0417 | 4 _ .KLVK+14. chr3@1218  | 4.89E-10 | 0.009693 |
| 31Mar2011 | 8348  | 791.43  | -20.9258 | 2 K.YRISSISLA chr5@8344  | 2.66E-11 | 7.46E-04 |
| 31May2011 | 5715  | 558.35  | 0.495171 | 2 K.ILKMALR( chr4@3163   | 1.94E-10 | 0.004345 |

|           |       |         |          |                         |          |          |
|-----------|-------|---------|----------|-------------------------|----------|----------|
| 31May2011 | 3296  | 839.42  | -14.1227 | 2 K.FVNSLEN chr2@1491   | 1.05E-10 | 0.003883 |
| 29Nov2011 | 15309 | 730.09  | -9.90975 | 3 R.QIADLPK chr5@9658   | 9.41E-11 | 0.003532 |
| 31Mar2011 | 2323  | 543.29  | -25.3236 | 2 K.NELFQPII chr3@7095  | 6.32E-10 | 0.006925 |
| 31Mar2011 | 4893  | 930.03  | -22.9282 | 2 K.FK+14.01 chr3@1515  | 3.38E-10 | 0.004217 |
| 29Nov2011 | 4443  | 560.79  | 10.24928 | 2 R.K+14.016 chr5@9925  | 7.94E-11 | 0.003016 |
| 31Mar2011 | 7008  | 479.92  | -25.7433 | 3 R.LADSLAP Splice@chr  | 5.53E-11 | 0.001155 |
| 31Mar2011 | 6907  | 479.92  | -25.7433 | 3 R.LADSLAP Splice@chr  | 3.97E-11 | 9.40E-04 |
| 31Mar2011 | 5608  | 479.92  | -25.7433 | 3 R.LADSLAP Splice@chr  | 2.40E-10 | 0.003284 |
| 31Mar2011 | 8423  | 814.79  | 14.90059 | 3 K.SNMGNE chrX@1739    | 2.60E-10 | 0.006916 |
| 31Mar2011 | 9317  | 1028.03 | -28.7462 | 2 _RDGKLDF chr5@2058    | 6.54E-10 | 0.007338 |
| 31Mar2011 | 6741  | 908.96  | -16.4693 | 2 R.VSLRDFI Splice@chr  | 2.26E-10 | 0.006724 |
| 31Mar2011 | 12834 | 563.56  | 4.912652 | 4 R.EVLYLSDI Splice@chr | 3.34E-10 | 0.003051 |
| 8Mar2011- | 3379  | 620.79  | 3.402001 | 2 _PFNYANE chr2@4394    | 8.38E-11 | 0.001988 |
| 8Mar2011- | 19131 | 749.73  | 6.335142 | 3 T.CQLEIYEN chr3@9177  | 1.71E-10 | 0.004547 |
| 8Mar2011- | 16951 | 1046.14 | 28.03253 | 4 K.RCKKLGG chrX@1260   | 3.38E-10 | 0.008153 |
| 8Mar2011- | 2842  | 416.25  | -15.6539 | 2 K.ATASVVK chr5@5194   | 3.18E-10 | 0.009887 |
| 31May2011 | 7730  | 910.13  | -15.737  | 3 K.ISGNTLQI chr4@5725  | 3.64E-10 | 0.00628  |
| 31May2011 | 2893  | 910.13  | -15.737  | 3 K.ISGNTLQI chr4@5725  | 2.73E-10 | 0.00134  |
| 31May2011 | 11310 | 1073.56 | 17.98277 | 3 K.NSDDATI chr1@9797   | 3.35E-10 | 0.005587 |
| 8Mar2011- | 1272  | 541.34  | -11.4087 | 2 K.PPKTAK+ chr4@1427   | 2.12E-10 | 0.005345 |
| 31May2011 | 4609  | 538.93  | -11.0438 | 3 K.EVDRGGI chr2@1328   | 2.37E-10 | 0.007252 |
| 31May2011 | 7159  | 788.91  | 2.11229  | 4 R.DGGSFSV chr2@8644   | 4.50E-10 | 0.008035 |
| 29Nov2011 | 12371 | 925.82  | 22.8796  | 3 L.EPQNMTI chr2@8508   | 1.59E-11 | 0.001272 |
| 29Nov2011 | 15066 | 658.33  | -25.5343 | 2 R.ESLNEAII Splice@chr | 2.16E-10 | 0.00535  |
| 31Mar2011 | 4214  | 424.6   | 12.39184 | 3 R.TIIPKKLTI chr5@3512 | 9.48E-11 | 0.001394 |
| 31Mar2011 | 3508  | 424.6   | 12.39184 | 3 R.TIIPKKLTI chr5@3512 | 3.56E-10 | 0.005399 |
| 31Mar2011 | 5218  | 661.83  | -16.3479 | 2 K.QKSCVK+ chr2@8549   | 4.24E-10 | 0.004968 |
| 8Mar2011- | 3050  | 803.47  | -29.0116 | 1 R.KTAAAGF chrX@5489   | 6.51E-11 | 0.001568 |
| 29Nov2011 | 17330 | 1112.93 | -14.2716 | 3 _IYAK+14.1 chrX@1202  | 3.05E-10 | 0.007606 |
| 29Nov2011 | 6173  | 1038    | 22.52558 | 2 R.RMVSFQI Splice@chr  | 1.84E-10 | 0.004157 |
| 29Nov2011 | 6319  | 643.09  | -3.40347 | 5 K.KKSNFNF chr2@5466   | 2.33E-10 | 0.006277 |
| 29Nov2011 | 9053  | 1060.01 | -26.6265 | 2 E.EK+14.01 chr2@5934  | 5.12E-11 | 0.00211  |
| 29Nov2011 | 20384 | 900.18  | 1.381523 | 3 K.LICLICWA chr5@2711  | 4.05E-10 | 0.008573 |
| 31May2011 | 9570  | 961.45  | -17.3486 | 2 K.FGVTDILL chrX@1755  | 3.04E-10 | 0.005387 |
| 29Nov2011 | 5298  | 643.33  | -10.4113 | 2 K.TCTNFKE Splice@chr  | 2.47E-10 | 0.008344 |
| 31Mar2011 | 10234 | 836.19  | -26.5274 | 4 K.NLVREFS chr5@6946   | 5.38E-10 | 0.008403 |
| 8Mar2011- | 7921  | 763.41  | -0.5193  | 2 F.TK+14.01 chr3@1310  | 3.78E-10 | 0.00805  |
| 31Mar2011 | 4349  | 1003.51 | -28.1271 | 2 K.FLRTFQQ chr5@1031   | 2.46E-10 | 0.002626 |
| 31May2011 | 5459  | 928.8   | 23.53905 | 3 R.TTGVVLD Splice@chr  | 3.64E-12 | 0        |
| 31May2011 | 8736  | 1130.61 | 12.85989 | 2 K.ATRQERT chr5@1685   | 3.16E-10 | 0.005837 |
| 8Mar2011- | 18533 | 946.5   | 4.554618 | 2 K.HKFRQFA chr2@1314   | 5.93E-11 | 0.001483 |
| 31Mar2011 | 10729 | 848.78  | -21.214  | 3 K.FGAQIQN chr4@1374   | 3.53E-10 | 0.004435 |
| 31Mar2011 | 1821  | 564.35  | 24.16146 | 2 K.KTHTK+1 chr5@2654   | 8.31E-10 | 0.009808 |
| 31May2011 | 9387  | 759.91  | -1.50777 | 4 _SRYGVVD Splice@chr   | 2.99E-10 | 0.00593  |
| 31Mar2011 | 10022 | 846.48  | 10.22241 | 2 _KCEK+14. chr3@1418   | 5.16E-10 | 0.005867 |
| 8Mar2011- | 2980  | 537.31  | -2.44714 | 2 R.NAQEGV chr5@1536    | 1.05E-10 | 0.003226 |
| 31Mar2011 | 8931  | 772.81  | -9.93252 | 5 K.AFLYSK+1 chr2@2610  | 7.99E-11 | 0.002702 |

|           |       |         |          |                          |          |          |
|-----------|-------|---------|----------|--------------------------|----------|----------|
| 31Mar2011 | 4900  | 420.23  | 7.279624 | 3 K.MCKSSV\ Splice@chr   | 3.65E-10 | 0.005429 |
| 31Mar2011 | 9135  | 857.96  | 5.076814 | 4 R.SCQTRVL chr5@108     | 1.25E-10 | 0.001467 |
| 8Mar2011- | 4175  | 961.47  | -29.3582 | 2 R.VGWTQS chr2@146      | 3.23E-11 | 3.86E-04 |
| 31May201  | 9     | 516.32  | -26.3765 | 2 R.KKMQK\ chr2@907      | 6.69E-10 | 0        |
| 31Mar2011 | 7102  | 1128.02 | -21.8605 | 2 R.DFM+15. Splice@chr   | 6.12E-10 | 0.007747 |
| 31Mar2011 | 6166  | 789.41  | -16.3049 | 2 R.KYLSHK+ Splice@chr   | 4.61E-10 | 0.004463 |
| 29Nov2011 | 12004 | 642.33  | -14.5292 | 3 _LM+15.9! Splice@chr   | 1.72E-10 | 0.00441  |
| 31May201  | 3523  | 649.38  | 24.5701  | 2 K.M+15.99 Splice@chr   | 3.66E-10 | 0.009923 |
| 31Mar2011 | 11066 | 1096.58 | 26.6676  | 3 D.HFDLPVE chr2@713     | 5.12E-10 | 0.008973 |
| 31Mar2011 | 6919  | 589.83  | -17.4789 | 2 K.NIDFSGK\ chr3@232    | 1.67E-10 | 0.002387 |
| 31May201  | 9975  | 1183.59 | -10.9957 | 3 _ELNSAFCl chrX@171     | 2.45E-10 | 0.006897 |
| 8Mar2011- | 15840 | 1104.05 | -21.0263 | 2 K.CVRM+1! chr1@540     | 1.92E-10 | 0.003267 |
| 8Mar2011- | 15898 | 1104.56 | -13.4724 | 2 K.CVRM+1! chr1@540     | 1.90E-10 | 0.003267 |
| 8Mar2011- | 14417 | 619.67  | 17.2981  | 3 K.ITFYISFLN Splice@chr | 3.57E-10 | 0.007361 |
| 8Mar2011- | 16679 | 1191.96 | -1.43497 | 3 K.GTTCIEK+ chr2@255    | 1.75E-10 | 0.003483 |
| 31May201  | 11210 | 1056.53 | 29.8678  | 3 _THFAHPT chr5@193      | 2.40E-10 | 0.008358 |
| 8Mar2011- | 10768 | 587.85  | 12.12905 | 2 _GRPEPVV chr1@146      | 5.56E-10 | 0.009834 |
| 31Mar2011 | 12065 | 576.04  | -21.1036 | 4 H.VDQLYVI chr4@152     | 7.48E-10 | 0.009468 |
| 29Nov2011 | 10098 | 666.04  | 2.29668  | 3 R.IVLVEPEK Splice@chr  | 5.80E-11 | 0.002758 |
| 8Mar2011- | 8004  | 442.58  | -19.6272 | 3 S.KMISEVT\ chr5@208    | 4.06E-10 | 0.008424 |
| 8Mar2011- | 8309  | 442.58  | -19.6272 | 3 S.KMISEVT\ chr5@208    | 4.58E-10 | 0.009816 |
| 31Mar2011 | 8042  | 1183.62 | -5.75607 | 2 R.ERRRRRN chr2@145     | 3.06E-10 | 0.003497 |
| 31Mar2011 | 8297  | 778.4   | -27.3063 | 3 R.KISRIFYQ\ chrX@152   | 4.87E-10 | 0.008821 |
| 31Mar2011 | 2155  | 556.31  | 18.95481 | 3 K.KADRGFC Splice@chr   | 6.61E-10 | 0.008685 |
| 31Mar2011 | 8908  | 532.83  | 28.69235 | 2 R.KNYVGSL chr1@588     | 2.47E-10 | 0.0049   |
| 8Mar2011- | 1111  | 550.3   | -5.50329 | 2 K.FQKKYQE chr1@128     | 2.87E-10 | 0.008501 |
| 31Mar2011 | 6205  | 657.04  | -28.8406 | 3 R.KVSPRW\ chr3@137     | 4.69E-10 | 0.006608 |
| 29Nov2011 | 15080 | 788.91  | -12.2071 | 2 R.KQLEK+1 chrX@111     | 2.26E-10 | 0.005345 |
| 8Mar2011- | 2453  | 451.74  | -9.54655 | 2 K.NVERGA\ chr5@111     | 9.27E-11 | 0.002157 |
| 8Mar2011- | 9144  | 969.51  | -0.50416 | 2 K.K+14.016 chr5@162    | 2.55E-10 | 0.004797 |
| 29Nov2011 | 3761  | 726.42  | 21.31556 | 3 K.NLNFEKN chr2@914     | 3.88E-12 | 0.001065 |
| 29Nov2011 | 14794 | 784.42  | -24.6967 | 2 R.K+14.016 chrX@233    | 3.27E-10 | 0.009023 |
| 8Mar2011- | 12572 | 739.67  | -15.8432 | 3 K.MFNLTYS chr2@242     | 8.27E-11 | 0.00249  |
| 8Mar2011- | 5340  | 823.47  | -10.983  | 1 K.VLGNVH\ chr5@803     | 4.89E-11 | 9.70E-04 |
| 31May201  | 3724  | 492.79  | 24.82265 | 2 K.IEDIRNPK Splice@chr  | 3.75E-10 | 0.009858 |
| 31May201  | 3759  | 492.79  | 24.82265 | 2 K.IEDIRNPK Splice@chr  | 2.20E-10 | 0.004906 |
| 31May201  | 2699  | 492.79  | 24.82265 | 2 K.IEDIRNPK Splice@chr  | 1.57E-10 | 0.007246 |
| 8Mar2011- | 18725 | 1191.9  | -17.8226 | 3 K.VWAITW chrX@159      | 3.24E-10 | 0.009774 |
| 29Nov2011 | 1784  | 818.45  | 22.80427 | 1 R.NDTRGVI chr4@102     | 3.03E-10 | 0.007749 |
| 31Mar2011 | 14819 | 958.84  | 10.36558 | 3 _EPLSND\ Splice@chr    | 9.77E-12 | 3.53E-04 |
| 29Nov2011 | 1477  | 458.26  | -19.666  | 3 _KLESKLQ\ chr2@351     | 2.73E-10 | 0.00716  |
| 31May201  | 7159  | 580.52  | -19.6948 | 4 R.TTGVVLD Splice@chr   | 3.27E-10 | 0.005837 |
| 31May201  | 9042  | 580.52  | -19.6948 | 4 R.TTGVVLD Splice@chr   | 1.99E-10 | 0.006576 |
| 31May201  | 9277  | 580.52  | -19.6948 | 4 R.TTGVVLD Splice@chr   | 3.31E-10 | 0.00941  |
| 31May201  | 7873  | 580.52  | -19.6948 | 4 R.TTGVVLD Splice@chr   | 5.37E-10 | 0.009688 |
| 31Mar2011 | 2807  | 512     | 16.32434 | 3 R.VLLSK+1\ chr5@153    | 3.11E-10 | 0.005805 |
| 8Mar2011- | 667   | 542.84  | -21.5149 | 2 K.QNGILKR Splice@chr   | 1.54E-10 | 0.003858 |

|           |       |         |          |                          |          |          |
|-----------|-------|---------|----------|--------------------------|----------|----------|
| 31May2011 | 6561  | 580.32  | 15.27714 | 2 R.SIILSTNM chrX@1109   | 1.93E-10 | 0.004345 |
| 31Mar2011 | 7901  | 606.34  | 8.629894 | 2 _FAGVGFL Splice@chr    | 1.45E-10 | 0.002445 |
| 8Mar2011- | 6770  | 1114.65 | 11.39994 | 1 K.LLTHNFTI chrX@1226   | 3.24E-10 | 0.007369 |
| 29Nov2011 | 541   | 770.45  | 11.42277 | 1 R.VEAVAGF Splice@chr   | 4.16E-11 | 0.002051 |
| 31May2011 | 12587 | 607.07  | 8.358813 | 4 _LFISFGGT Splice@chr   | 2.88E-10 | 0.007477 |
| 29Nov2011 | 4348  | 625.82  | -19.7951 | 2 K.M+15.99 chr4@1634    | 2.04E-10 | 0.004729 |
| 31May2011 | 5380  | 686.37  | -13.2988 | 3 R.TLTRKAV chr5@1151    | 9.74E-11 | 0.004575 |
| 31May2011 | 5333  | 686.7   | -19.6799 | 3 R.TLTRKAV chr5@1151    | 1.59E-10 | 0.006331 |
| 31May2011 | 3668  | 686.71  | -5.07504 | 3 R.TLTRKAV chr5@1151    | 1.91E-10 | 0.005627 |
| 31May2011 | 4635  | 686.71  | -5.07504 | 3 R.TLTRKAV chr5@1151    | 2.30E-10 | 0.007186 |
| 31May2011 | 4605  | 686.71  | -5.07504 | 3 R.TLTRKAV chr5@1151    | 7.15E-11 | 0.001499 |
| 31May2011 | 4569  | 686.37  | -13.2988 | 3 R.TLTRKAV chr5@1151    | 3.77E-11 | 0.001009 |
| 31May2011 | 5601  | 686.71  | -5.07504 | 3 R.TLTRKAV chr5@1151    | 5.19E-10 | 0.00932  |
| 31May2011 | 3757  | 686.71  | -5.07504 | 3 R.TLTRKAV chr5@1151    | 1.74E-10 | 0.00558  |
| 31May2011 | 3796  | 686.71  | -5.07504 | 3 R.TLTRKAV chr5@1151    | 2.29E-10 | 0.00895  |
| 31May2011 | 4540  | 686.71  | -5.07504 | 3 R.TLTRKAV chr5@1151    | 1.98E-10 | 0.005444 |
| 31May2011 | 4648  | 686.71  | -5.07504 | 3 R.TLTRKAV chr5@1151    | 1.47E-10 | 0.003186 |
| 31May2011 | 3769  | 686.71  | -5.07504 | 3 R.TLTRKAV chr5@1151    | 1.55E-10 | 0.004016 |
| 31May2011 | 4102  | 686.37  | -13.2988 | 3 R.TLTRKAV chr5@1151    | 8.42E-11 | 0.003311 |
| 31May2011 | 4702  | 686.71  | -5.07504 | 3 R.TLTRKAV chr5@1151    | 2.17E-10 | 0.006748 |
| 31May2011 | 3382  | 686.37  | -13.2988 | 3 R.TLTRKAV chr5@1151    | 4.80E-10 | 0.008621 |
| 31May2011 | 3442  | 686.71  | -5.07504 | 3 R.TLTRKAV chr5@1151    | 3.26E-11 | 8.38E-04 |
| 31May2011 | 5603  | 686.71  | -5.07504 | 3 R.TLTRKAV chr5@1151    | 3.64E-10 | 0.005882 |
| 8Mar2011- | 13990 | 786.9   | 11.5419  | 2 K.FNSTQTK chrX@1167    | 3.28E-10 | 0.007368 |
| 31May2011 | 6477  | 890.43  | -3.36299 | 3 K.RHLSRSFI chrX@1258   | 1.57E-10 | 0.004991 |
| 31May2011 | 5701  | 712.97  | -28.265  | 2 K.LQLMLLL chr3@2316    | 1.84E-10 | 0.003049 |
| 31May2011 | 5661  | 712.97  | -28.265  | 2 K.LQLMLLL chr3@2316    | 1.57E-10 | 0.00256  |
| 31May2011 | 7337  | 712.97  | -28.265  | 2 K.LQLMLLL chr3@2316    | 1.29E-10 | 0.002705 |
| 31Mar2011 | 3695  | 480.76  | 0.763334 | 2 _QGGKKEI Splice@chr    | 4.21E-10 | 0.007911 |
| 29Nov2011 | 15466 | 889.49  | -1.78609 | 2 K.TK+14.01 chr1@5230   | 2.84E-10 | 0.007249 |
| 31May2011 | 8701  | 958.85  | 11.38504 | 3 K.IIFKNSFY chr2@5684   | 2.06E-10 | 0.004439 |
| 31Mar2011 | 10984 | 1102.6  | 26.70655 | 2 R.LRVLVEF chr1@1085    | 4.50E-10 | 0.006811 |
| 31May2011 | 6973  | 512.84  | -20.3105 | 4 K.KKKKK+1 chr1@3858    | 2.36E-10 | 0.006748 |
| 29Nov2011 | 7459  | 655.42  | 16.32202 | 2 R.KVLGIAM chr1@1225    | 3.49E-10 | 0.009902 |
| 29Nov2011 | 14686 | 1351.63 | 19.76487 | 1 K.EHVPENI chr5@1618    | 2.34E-10 | 0.005741 |
| 29Nov2011 | 12185 | 1350.63 | 22.25065 | 1 K.EHVPENI chr5@1618    | 4.35E-10 | 0.009781 |
| 31May2011 | 8316  | 1150.59 | -1.566   | 2 R.LITHGSID Splice@chr  | 3.75E-10 | 0.008076 |
| 8Mar2011- | 17587 | 901.49  | 8.743765 | 2 _EFPDPPQ chr2@1082     | 4.03E-10 | 0.009796 |
| 31Mar2011 | 7645  | 492.92  | 21.58992 | 3 K.IICCGQNI chr5@9515   | 5.43E-10 | 0.006043 |
| 31May2011 | 7270  | 578.98  | 5.037885 | 3 K.KNLPSGA chr2@1460    | 2.83E-10 | 0.009513 |
| 31May2011 | 11394 | 987.5   | -10.4913 | 2 R.YIEVKNN chrX@7362    | 2.67E-10 | 0.006481 |
| 29Nov2011 | 6068  | 1264.65 | 24.02694 | 1 A.SSAFFSPI chr2@1409   | 1.16E-10 | 0.002658 |
| 29Nov2011 | 6525  | 1127.67 | 7.321892 | 1 K.ISSVPNIQ chr4@5652   | 1.09E-10 | 0.003061 |
| 8Mar2011- | 7658  | 473.78  | -13.9552 | 2 K.SITAAEILI Splice@chr | 3.48E-10 | 0.009248 |
| 8Mar2011- | 5145  | 473.78  | -13.9552 | 2 K.SITAAEILI Splice@chr | 3.93E-10 | 0.008856 |
| 8Mar2011- | 7699  | 473.78  | -13.9552 | 2 K.SITAAEILI Splice@chr | 2.89E-10 | 0.008237 |
| 8Mar2011- | 13753 | 1161.03 | -7.68181 | 2 K.EKGGFRV Splice@chr   | 2.97E-10 | 0.007632 |

|           |       |         |          |                         |          |          |
|-----------|-------|---------|----------|-------------------------|----------|----------|
| 29Nov2011 | 9669  | 648.68  | -3.14125 | 3 _ .KLEWQKI chr2@2705  | 3.62E-10 | 0.009933 |
| 8Mar2011- | 2450  | 582.29  | -1.89001 | 2 K.MEREWK chr3@3671    | 1.61E-10 | 0.004447 |
| 31May2011 | 4655  | 548.8   | -16.1128 | 2 _ .KFFPGSR chr4@3082  | 1.89E-10 | 0.006794 |
| 29Nov2011 | 734   | 855.43  | -7.6824  | 2 N.RIEEKEEK chr2@8582  | 3.12E-10 | 0.007606 |
| 29Nov2011 | 693   | 855.43  | -7.6824  | 2 N.RIEEKEEK chr2@8582  | 3.94E-10 | 0.009579 |
| 29Nov2011 | 11777 | 958.49  | -16.2303 | 2 K.KVKKNQL chr3@4205   | 1.87E-10 | 0.004593 |
| 29Nov2011 | 11701 | 954.96  | -19.322  | 2 R.GFRVEDK chr4@4626   | 2.61E-10 | 0.009737 |
| 8Mar2011- | 13182 | 955.46  | -21.0803 | 2 R.GFRVEDK chr4@4626   | 4.37E-10 | 0.00851  |
| 29Nov2011 | 16105 | 1190.6  | -17.1023 | 3 K.WWSCGF Splice@chr   | 4.47E-11 | 0.001695 |
| 31Mar2011 | 6574  | 472.28  | 0        | 3 K.FIHSIVAI chr4@6740  | 4.89E-10 | 0.006638 |
| 29Nov2011 | 14415 | 953.49  | 27.04254 | 2 R.SGEEDPT chr4@3797   | 4.43E-10 | 0.009899 |
| 8Mar2011- | 14397 | 819.44  | -25.929  | 2 R.M+15.99 chrX@7273   | 9.89E-11 | 0.003113 |
| 8Mar2011- | 14272 | 819.44  | -25.929  | 2 R.M+15.99 chrX@7273   | 1.39E-10 | 0.003545 |
| 8Mar2011- | 13144 | 819.44  | -25.929  | 2 R.M+15.99 chrX@7273   | 5.04E-10 | 0.009673 |
| 8Mar2011- | 11061 | 819.44  | -25.929  | 2 R.M+15.99 chrX@7273   | 2.65E-10 | 0.005249 |
| 29Nov2011 | 15647 | 1015.5  | -28.6256 | 3 R.EK+14.01 chrX@4960  | 2.58E-11 | 8.57E-04 |
| 31Mar2011 | 6223  | 889.95  | 1.167229 | 2 R.NSWPWK chr5@2078    | 2.67E-11 | 0        |
| 29Nov2011 | 17497 | 1352.19 | -26.8178 | 2 R.RLGK+14 Splice@chr  | 3.74E-10 | 0.008738 |
| 8Mar2011- | 9643  | 647.87  | -18.7421 | 2 R.EAAVKTF Splice@chr  | 3.73E-11 | 0.001237 |
| 29Nov2011 | 7436  | 702.88  | -25.9136 | 2 _ .MTVSSKI chr4@3698  | 8.62E-12 | 2.13E-04 |
| 29Nov2011 | 6753  | 702.88  | -25.9136 | 2 _ .MTVSSKI chr4@3698  | 1.84E-12 | 2.85E-04 |
| 8Mar2011- | 2968  | 575.31  | 28.16422 | 2 K.ACRDGTI chr5@1885   | 2.83E-10 | 0.00635  |
| 31Mar2011 | 13504 | 1009.86 | 4.033323 | 3 _ .QSWNWI chr4@1089   | 2.65E-10 | 0.004468 |
| 8Mar2011- | 13352 | 581.3   | -16.9688 | 3 K.FGIAIHN Splice@chr  | 1.93E-10 | 0.003719 |
| 8Mar2011- | 4707  | 562.8   | 22.56613 | 2 S.FSDISELN chrX@6058  | 4.01E-10 | 0.00909  |
| 8Mar2011- | 7265  | 562.8   | 22.56613 | 2 S.FSDISELN chrX@6058  | 3.72E-10 | 0.009636 |
| 31Mar2011 | 6179  | 501.79  | -22.4863 | 2 K.IAQSTNLI chr4@8777  | 8.08E-11 | 0.001975 |
| 29Nov2011 | 6253  | 801.46  | 8.279815 | 2 R.EMPTTQI chr3@3339   | 4.35E-11 | 0.001539 |
| 29Nov2011 | 6241  | 702.38  | -8.52813 | 1 K.MIPASAI chr5@1039   | 4.14E-10 | 0.008738 |
| 8Mar2011- | 5806  | 438.25  | -7.88684 | 4 K.KKYPLQT chr4@2456   | 4.98E-10 | 0.00989  |
| 31May2011 | 2579  | 633.33  | -12.1621 | 2 R.ALFM+15 Splice@chr  | 2.07E-10 | 0.00561  |
| 29Nov2011 | 5283  | 932.51  | 6.299371 | 1 R.CGGLRGF chr2@1174   | 6.54E-11 | 0.003001 |
| 8Mar2011- | 3210  | 586.37  | -27.9133 | 2 K.KTPIIPKF chrX@7927  | 2.76E-10 | 0.005963 |
| 31Mar2011 | 2021  | 554.28  | -5.84675 | 2 R.FYLNHAS chrX@8407   | 4.94E-10 | 0.004622 |
| 29Nov2011 | 10970 | 650.33  | -26.2372 | 3 R.EM+15.9 chr2@6826   | 2.18E-10 | 0.006015 |
| 31Mar2011 | 9395  | 930.56  | -27.1828 | 2 K.IFFKKTFY chr5@1848  | 5.33E-10 | 0.007262 |
| 31May2011 | 10186 | 1193.61 | -13.5108 | 2 K.EMEKEEK Splice@chr  | 4.01E-10 | 0.007564 |
| 29Nov2011 | 24955 | 863.48  | -26.0418 | 1 R.SMVLKSC chrX@1352   | 1.36E-10 | 0.003457 |
| 29Nov2011 | 912   | 563.29  | 14.07175 | 2 K.NNFFPNF chr1@8665   | 6.63E-11 | 0.001651 |
| 31Mar2011 | 5796  | 589.83  | -20.2799 | 2 R.RMLTSLS chr3@1119   | 4.74E-10 | 0.007621 |
| 8Mar2011- | 15145 | 806.43  | -23.7823 | 4 K.EKKLKQK chr1@5488   | 1.54E-10 | 0.003845 |
| 8Mar2011- | 20685 | 970.85  | 10.01065 | 3 K.QKHLELF chrX@1057   | 3.42E-10 | 0.007161 |
| 29Nov2011 | 22430 | 1065.07 | -14.4318 | 2 R.KK+14.01 Splice@chr | 2.34E-10 | 0.005741 |
| 29Nov2011 | 26827 | 791.75  | -3.60206 | 3 K.DMK+14. chr5@1190   | 1.07E-10 | 0.003214 |
| 8Mar2011- | 15821 | 1165.11 | -13.2959 | 2 R.RCERRGS chr4@1406   | 4.37E-10 | 0.009644 |
| 31Mar2011 | 8649  | 518.27  | -20.0174 | 2 R.PRVPDAI chr3@8558   | 4.21E-11 | 4.24E-04 |
| 29Nov2011 | 11734 | 800.5   | -13.5124 | 2 K.KKLILCQK chr1@1450  | 5.14E-11 | 0.001414 |

|           |       |         |          |                         |          |          |
|-----------|-------|---------|----------|-------------------------|----------|----------|
| 31Mar2011 | 12174 | 991.06  | 22.48383 | 2 K.KCFQRKK chr2@1025   | 4.21E-10 | 0.004601 |
| 29Nov2011 | 5329  | 690.34  | -22.4007 | 2 R.IEKGEEHI chr5@6878  | 1.02E-10 | 0.002608 |
| 8Mar2011- | 9993  | 623.32  | 24.39438 | 2 K.MNNLDL chr1@1330    | 3.56E-10 | 0.005408 |
| 29Nov2011 | 21663 | 1118.62 | 17.91309 | 2 _HENAARF chr5@1002    | 4.80E-12 | 7.83E-04 |
| 8Mar2011- | 16055 | 1016.5  | -4.48775 | 3 K.CLM+15.1 chrX@6876  | 4.05E-11 | 0.001569 |
| 8Mar2011- | 5718  | 646.85  | -3.21315 | 2 K.NAENSFK chr4@1124   | 1.06E-10 | 0.003226 |
| 8Mar2011- | 6086  | 875.5   | -23.1016 | 1 R.LVQTTSV chr1@2683   | 2.69E-10 | 0.007079 |
| 29Nov2011 | 12069 | 861.48  | 5.8566   | 2 K.IENSPFFC chr4@2679  | 2.01E-10 | 0.003381 |
| 8Mar2011- | 10277 | 939.55  | -14.3068 | 2 K.K+14.016 chr1@2005  | 2.10E-10 | 0.006233 |
| 8Mar2011- | 13494 | 895.47  | 23.86388 | 2 K.TEM+15.1 chr2@1473  | 3.04E-10 | 0.007517 |
| 8Mar2011- | 10877 | 895.47  | 23.86388 | 2 K.TEM+15.1 chr2@1473  | 6.80E-11 | 0.001363 |
| 8Mar2011- | 20659 | 1139.64 | 14.7949  | 2 R.QM+15.9 chr5@1447   | 5.92E-11 | 0.001482 |
| 8Mar2011- | 17051 | 1084.2  | -22.1503 | 3 R.EHMTCK chr1@4921    | 2.46E-10 | 0.007087 |
| 8Mar2011- | 21809 | 958.48  | -29.2233 | 1 R.KLDGFSY chr1@9355   | 1.75E-10 | 0.004682 |
| 29Nov2011 | 13363 | 1074.57 | -5.23044 | 2 K.TK+14.01 chr1@8378  | 1.84E-11 | 0.001474 |
| 8Mar2011- | 5627  | 409.19  | -19.5613 | 4 R.PMDITG chr5@1394    | 5.16E-10 | 0.009819 |
| 29Nov2011 | 4962  | 838.44  | -11.5155 | 1 R.KDAVFM chrX@6702    | 1.60E-10 | 0.006288 |
| 31Mar2011 | 7505  | 644.01  | -24.9955 | 3 R.CVFPPKP chrX@8063   | 7.18E-14 | 0        |
| 31Mar2011 | 9157  | 644.01  | -24.9955 | 3 R.CVFPPKP chrX@8063   | 3.32E-14 | 0        |
| 8Mar2011- | 18347 | 1168.59 | -25.2842 | 2 K.NFAFFSN Splice@chr  | 2.02E-10 | 0.002921 |
| 8Mar2011- | 20227 | 472.29  | -23.052  | 2 K.KNSK+14 chr4@7943   | 2.07E-10 | 0.003955 |
| 8Mar2011- | 18837 | 959.01  | 15.77807 | 2 _NYFFAFQ chr3@1071    | 4.07E-10 | 0.007517 |
| 31Mar2011 | 5241  | 695.35  | -9.14189 | 2 K.MTAEEV chr2@1929    | 5.55E-13 | 0        |
| 29Nov2011 | 4415  | 1083.03 | 18.05102 | 2 R.SRDCCFSK Splice@chr | 3.40E-10 | 0.008444 |
| 31May2011 | 3299  | 886.49  | -1.86107 | 2 K.KTLKSRH chr5@4461   | 3.87E-10 | 0.007682 |
| 8Mar2011- | 16933 | 730.89  | -15.2864 | 4 K.MEKVK+1 chr3@1335   | 2.99E-10 | 0.007632 |
| 29Nov2011 | 2909  | 795.39  | 1.459839 | 1 R.DTVFDAK Splice@chr  | 9.15E-11 | 0.002742 |
| 8Mar2011- | 8399  | 939.02  | 12.92434 | 2 K.NDRTK+1 chr2@5298   | 4.60E-10 | 0.008241 |
| 8Mar2011- | 11196 | 1015.49 | 2.559294 | 2 P.RMFIGPL chr4@1500   | 8.08E-14 | 0        |
| 29Nov2011 | 274   | 474.29  | 22.65953 | 2 R.YPVVKNA Splice@chr  | 2.43E-10 | 0.008344 |
| 31Mar2011 | 11408 | 1016.61 | -19.4884 | 1 _DLALK+1 chrX@4873    | 5.05E-10 | 0.007732 |
| 31Mar2011 | 3078  | 565.81  | -27.6638 | 2 R.KESRGHK chrX@5338   | 4.07E-10 | 0.006198 |
| 29Nov2011 | 3155  | 547.8   | 29.13473 | 2 K.SRM+15.1 chr1@5701  | 3.63E-10 | 0.009933 |
| 29Nov2011 | 15645 | 1035.53 | -11.2774 | 1 _TRPTEQF Splice@chr   | 2.14E-10 | 0.008655 |
| 8Mar2011- | 1628  | 541.25  | -16.4944 | 2 K.MFGEQLI chr5@1742   | 9.28E-11 | 0.003306 |
| 29Nov2011 | 6141  | 1130.61 | 15.30691 | 1 I.YYTLKQGF Splice@chr | 2.92E-10 | 0.005341 |
| 29Nov2011 | 9202  | 490.28  | -17.09   | 2 K.LSELRHPI chr1@1407  | 1.15E-10 | 0.003454 |
| 29Nov2011 | 694   | 595.3   | -19.205  | 2 R.KNSRGSC chrX@1366   | 2.56E-10 | 0.009903 |
| 31May2011 | 6045  | 732.74  | 29.58429 | 3 K.LFQWTGI Splice@chr  | 7.53E-11 | 0.001587 |
| 29Nov2011 | 10297 | 583     | -21.1598 | 3 H.HNALLPT chr1@8349   | 8.62E-11 | 0.002361 |
| 31Mar2011 | 674   | 748.37  | 9.391844 | 1 R.ASTLGHY chr2@3949   | 1.86E-10 | 0.005825 |
| 8Mar2011- | 14716 | 792.91  | 9.603258 | 2 K.MKMFHM Splice@chr   | 3.94E-10 | 0.00953  |
| 31Mar2011 | 6351  | 873.96  | -22.6997 | 2 K.AMHKTIC chrX@8292   | 6.31E-10 | 0.008566 |
| 31May2011 | 111   | 602.29  | 14.41439 | 2 N.HQNNWN chrX@5959    | 4.59E-09 | 0        |
| 29Nov2011 | 16185 | 650.99  | 22.45593 | 3 K.NFEEENV chr1@1336   | 2.72E-10 | 0.006875 |
| 31May2011 | 5778  | 579.83  | -12.6535 | 2 R.SIILSMPK Splice@chr | 1.53E-10 | 0.003266 |
| 29Nov2011 | 13211 | 983.5   | -13.9524 | 2 _YFLK+14.1 chr5@1001  | 9.07E-11 | 0.002076 |

|           |       |         |          |                         |          |          |
|-----------|-------|---------|----------|-------------------------|----------|----------|
| 8Mar2011- | 10787 | 1101.04 | 7.689198 | 2 R.ASVDTTA chr5@1992   | 9.93E-18 | 0        |
| 29Nov2011 | 17249 | 1227.64 | -29.1437 | 2 K.NSNLPSI chr5@1253   | 1.51E-10 | 0.004873 |
| 29Nov2011 | 20702 | 698.03  | 26.97093 | 3 K.RPEGAAF Splice@chr  | 2.01E-10 | 0.006229 |
| 8Mar2011- | 14016 | 1184.09 | -27.5333 | 2 R.ELTACCR chr4@1213   | 1.12E-10 | 0.002534 |
| 29Nov2011 | 9261  | 509.29  | 24.257   | 4 R.DIFPSNK- chr5@1316  | 4.88E-11 | 0.002157 |
| 29Nov2011 | 9584  | 509.54  | 22.6069  | 4 R.DIFPSNK- chr5@1316  | 1.57E-10 | 0.00667  |
| 31Mar2011 | 9689  | 920.49  | -9.19739 | 2 K.YRRRDM chr5@1865    | 2.57E-10 | 0.006916 |
| 31Mar2011 | 1856  | 691.83  | -20.4088 | 2 K.LESYQQK chr1@1492   | 3.85E-10 | 0.005798 |
| 31Mar2011 | 759   | 572.78  | -17.2527 | 2 K.KINESFD chr5@1593   | 4.94E-10 | 0.006879 |
| 31Mar2011 | 1029  | 572.78  | -17.2527 | 2 K.KINESFD chr5@1593   | 3.33E-10 | 0.008447 |
| 31Mar2011 | 8223  | 1181.55 | -23.1615 | 2 R.VYVQIM- Splice@chr  | 1.45E-10 | 0.00842  |
| 8Mar2011- | 14109 | 1045.56 | 24.57002 | 3 P.NPEVPQI Splice@chr  | 1.28E-14 | 0        |
| 8Mar2011- | 16005 | 1045.55 | 14.98389 | 3 P.NPEVPQI Splice@chr  | 1.02E-14 | 0        |
| 8Mar2011- | 15283 | 1110.06 | -22.545  | 2 L.YQK+14.C chrX@1639  | 3.08E-10 | 0.008265 |
| 8Mar2011- | 14816 | 1110.06 | -22.545  | 2 L.YQK+14.C chrX@1639  | 2.38E-10 | 0.007249 |
| 8Mar2011- | 6633  | 657.35  | 3.863808 | 2 R.FQLKSVQ chrX@1495   | 3.65E-10 | 0.009332 |
| 29Nov2011 | 9642  | 672.11  | 18.18986 | 4 K.VFKKITEK chr4@4187  | 2.69E-10 | 0.004847 |
| 29Nov2011 | 14625 | 851.45  | 10.71539 | 4 K.RRSPSCQ chr4@5857   | 7.06E-11 | 0.001564 |
| 29Nov2011 | 5710  | 636.32  | -22.8327 | 2 _ELEKHPSI chr5@1664   | 6.82E-11 | 0.004475 |
| 31Mar2011 | 11878 | 1094.62 | -7.89978 | 2 K.SREKLTK- chr4@1596  | 6.88E-10 | 0.009263 |
| 31Mar2011 | 6923  | 623.81  | 27.539   | 2 K.KFFNSEM chr5@1675   | 2.44E-10 | 0.002626 |
| 31Mar2011 | 7936  | 623.81  | 27.539   | 2 K.KFFNSEM chr5@1675   | 4.23E-10 | 0.008494 |
| 31Mar2011 | 5859  | 623.81  | 27.539   | 2 K.KFFNSEM chr5@1675   | 4.67E-10 | 0.007239 |
| 29Nov2011 | 3366  | 1140.6  | -28.0333 | 1 K.NQK+14.I chr1@1307  | 3.87E-10 | 0.008839 |
| 29Nov2011 | 21384 | 859.47  | -2.45307 | 2 K.RADNPLL Splice@chr  | 4.32E-10 | 0.009788 |
| 8Mar2011- | 17858 | 910.46  | -6.88155 | 2 R.RMTK+14 chr3@1079   | 1.72E-10 | 0.003369 |
| 29Nov2011 | 6861  | 700.82  | 3.314237 | 2 R.TSVYSHF chrX@1767   | 2.68E-10 | 0.00761  |
| 31Mar2011 | 7437  | 769.91  | -1.66697 | 2 K.K+14.016 chr4@1219  | 9.28E-11 | 0.001357 |
| 29Nov2011 | 16447 | 918.96  | -16.8218 | 2 K.GLSHFELI chr1@1487  | 1.98E-10 | 0.004711 |
| 29Nov2011 | 14125 | 663.36  | -29.3693 | 2 R.NVIANVII chr3@6068  | 1.90E-10 | 0.00559  |
| 8Mar2011- | 12825 | 942.01  | -18.9393 | 2 _RVWVFLI chr2@1630    | 2.55E-11 | 6.88E-04 |
| 29Nov2011 | 9754  | 1158.1  | 18.18108 | 2 ?_SLNSDFV Splice@chr  | 3.05E-10 | 0.00657  |
| 29Nov2011 | 16197 | 644.9   | -3.55575 | 2 K.EIGK+14. chr3@5818  | 2.25E-10 | 0.006115 |
| 29Nov2011 | 6738  | 852.44  | -2.97542 | 2 K.NNDYFLC chr1@1396   | 2.03E-10 | 0.006102 |
| 8Mar2011- | 509   | 527.77  | -20.0449 | 2 F.LEDITQH Splice@chr  | 1.74E-10 | 0.003702 |
| 8Mar2011- | 4229  | 527.77  | -20.0449 | 2 F.LEDITQH Splice@chr  | 2.83E-10 | 0.004473 |
| 8Mar2011- | 4186  | 527.77  | -20.0449 | 2 F.LEDITQH Splice@chr  | 1.64E-10 | 0.004547 |
| 29Nov2011 | 9959  | 899.45  | 9.714718 | 2 R.HLCEFPPI chr1@1362  | 4.08E-11 | 0.001123 |
| 31Mar2011 | 5143  | 571.29  | -19.2644 | 2 _YFCIGRIG Splice@chr  | 3.52E-10 | 0.00532  |
| 31Mar2011 | 3174  | 497.04  | 5.017799 | 4 L.GRLQPTE Splice@chr  | 2.96E-10 | 0.004822 |
| 31Mar2011 | 11040 | 930.56  | -4.56472 | 2 K.RILHK+14 Splice@chr | 5.45E-10 | 0.008816 |
| 29Nov2011 | 16812 | 746.13  | 3.298838 | 4 R.CESINNS chr5@1487   | 1.21E-10 | 0.001604 |
| 8Mar2011- | 20834 | 1029.53 | 1.811879 | 2 K.YLTICNTL chr2@5820  | 3.35E-10 | 0.007456 |
| 29Nov2011 | 3169  | 990.49  | -15.6435 | 2 K.RFVTLSEI chr3@1284  | 2.47E-10 | 0.009196 |
| 31Mar2011 | 12748 | 1043.21 | -0.15617 | 3 K.VKMPESF Splice@chr  | 9.24E-11 | 0.001175 |
| 31May2011 | 6360  | 796.48  | 4.765881 | 1 R.VAPNPGI chr1@4941   | 2.80E-10 | 0.007214 |
| 31Mar2011 | 10466 | 962.55  | -9.33844 | 1 _RRTVHHF chr4@3538    | 5.63E-10 | 0.007061 |

|           |       |         |          |                          |          |          |
|-----------|-------|---------|----------|--------------------------|----------|----------|
| 31Mar2011 | 2386  | 417.23  | -13.3441 | 2 R.VLFGGN/ chr5@9856    | 3.77E-10 | 0.003598 |
| 29Nov2011 | 19386 | 743.92  | -13.1934 | 2 R.KPPRLFW Splice@chr   | 6.14E-11 | 0.001969 |
| 31Mar2011 | 4222  | 600.72  | -22.8783 | 5 R.RPM+15. Splice@chr   | 1.10E-10 | 0.004401 |
| 29Nov2011 | 24270 | 1127.62 | 23.2646  | 1 _..TCSPRRH Splice@chr  | 2.12E-12 | 1.20E-04 |
| 31Mar2011 | 8304  | 679.39  | -3.149   | 2 _..LETGIKPI Splice@chr | 8.84E-11 | 0.001536 |
| 31Mar2011 | 7042  | 679.4   | 11.60631 | 2 _..LETGIKPI Splice@chr | 7.35E-11 | 0.001063 |
| 31Mar2011 | 6823  | 679.39  | -3.149   | 2 _..LETGIKPI Splice@chr | 5.45E-11 | 0.001155 |
| 29Nov2011 | 15295 | 1116.53 | -25.8078 | 2 _..NQGVLPF Splice@chr  | 4.85E-11 | 0.001361 |
| 29Nov2011 | 15242 | 1116.03 | -24.3035 | 2 _..NQGVLPF Splice@chr  | 7.20E-11 | 0.001837 |
| 29Nov2011 | 15244 | 744.36  | -18.8297 | 3 _..NQGVLPF Splice@chr  | 2.72E-11 | 4.34E-04 |
| 29Nov2011 | 14211 | 1116.03 | -24.3035 | 2 _..NQGVLPF Splice@chr  | 3.44E-10 | 0.009036 |
| 29Nov2011 | 12961 | 1116.03 | -24.3035 | 2 _..NQGVLPF Splice@chr  | 2.71E-10 | 0.007168 |
| 29Nov2011 | 16709 | 1116.03 | -24.3035 | 2 _..NQGVLPF Splice@chr  | 2.48E-10 | 0.006587 |
| 29Nov2011 | 16764 | 1116.03 | -24.3035 | 2 _..NQGVLPF Splice@chr  | 1.66E-10 | 0.004517 |
| 29Nov2011 | 14764 | 1116.03 | -24.3035 | 2 _..NQGVLPF Splice@chr  | 1.26E-10 | 0.002659 |
| 29Nov2011 | 14818 | 1116.53 | -25.8078 | 2 _..NQGVLPF Splice@chr  | 9.61E-13 | 1.29E-04 |
| 29Nov2011 | 14762 | 744.36  | -18.8297 | 3 _..NQGVLPF Splice@chr  | 7.29E-11 | 0.001543 |
| 29Nov2011 | 14827 | 1116.03 | -24.3035 | 2 _..NQGVLPF Splice@chr  | 2.77E-10 | 0.006988 |
| 8Mar2011- | 12809 | 874.98  | 18.41405 | 2 R.ECIQAFD chr1@4792    | 1.22E-10 | 0.005005 |
| 31Mar2011 | 4905  | 497.04  | 21.71823 | 4 K.KVNLPTLI chrX@1337   | 5.14E-10 | 0.009492 |
| 29Nov2011 | 14336 | 1144.91 | 1.138283 | 3 K.IETQSNK- chr4@6474   | 1.99E-10 | 0.005857 |
| 29Nov2011 | 12737 | 1145.25 | 5.994399 | 3 K.IETQSNK- chr4@6474   | 2.37E-10 | 0.008444 |
| 29Nov2011 | 18633 | 1156.6  | 2.14096  | 2 _..LFSCFLYV chr2@3948  | 1.13E-10 | 0.003524 |
| 31May2011 | 6077  | 653.32  | -6.71518 | 4 R.VYLDSVF chrX@5081    | 5.83E-10 | 0.00968  |
| 31May2011 | 6312  | 653.32  | -6.71518 | 4 R.VYLDSVF chrX@5081    | 2.82E-10 | 0.005732 |
| 31Mar2011 | 7320  | 791.08  | -28.9287 | 3 _..GSAQLFL chr3@8456   | 3.83E-10 | 0.007637 |
| 8Mar2011- | 12022 | 643.85  | -25.9195 | 2 K.LSDK+14. chr3@1284   | 2.50E-10 | 0.007283 |
| 31Mar2011 | 9062  | 793.43  | 1.812558 | 2 K.QFPSKKII chr3@1225   | 5.53E-10 | 0.00629  |
| 31Mar2011 | 8055  | 574.3   | -1.17111 | 2 R.FSKLGGP chr1@1253    | 4.12E-10 | 0.005698 |
| 31Mar2011 | 7896  | 574.3   | -1.17111 | 2 R.FSKLGGP chr1@1253    | 6.55E-10 | 0.009098 |
| 31Mar2011 | 7134  | 574.3   | -1.17111 | 2 R.FSKLGGP chr1@1253    | 2.53E-10 | 0.003036 |
| 8Mar2011- | 3666  | 562.31  | -13.4391 | 2 R.FYLLYLYK Splice@chr  | 6.74E-11 | 0.00274  |
| 8Mar2011- | 19289 | 1060.54 | -6.74128 | 3 K.SGTIFDNI Splice@chr  | 5.65E-14 | 0        |
| 8Mar2011- | 20484 | 1175.11 | -2.15736 | 2 K.INWAVTI chr4@2890    | 7.89E-18 | 0        |
| 8Mar2011- | 19416 | 1060.54 | -6.74128 | 3 K.SGTIFDNI Splice@chr  | 1.20E-14 | 0        |
| 8Mar2011- | 19410 | 795.65  | -15.5001 | 4 K.SGTIFDNI Splice@chr  | 4.03E-16 | 0        |
| 8Mar2011- | 355   | 501.07  | 8.971133 | 4 R.KKLMMK chr5@1910     | 4.01E-10 | 0.008642 |
| 8Mar2011- | 17011 | 937     | -18.3647 | 2 R.NPFLEEV. chr3@1097   | 3.25E-11 | 9.54E-04 |
| 8Mar2011- | 15050 | 753.95  | -13.1319 | 2 K.K+14.016 chr2@1375   | 9.48E-12 | 2.98E-04 |
| 8Mar2011- | 6903  | 626.3   | -9.76097 | 2 R.LCESGAA Splice@chr   | 3.08E-16 | 0        |
| 8Mar2011- | 19249 | 792.15  | -18.5783 | 4 K.SGTIFDNI Splice@chr  | 8.70E-17 | 0        |
| 8Mar2011- | 20008 | 799.16  | -7.85909 | 4 K.SGTIFDNI Splice@chr  | 1.14E-12 | 1.52E-04 |
| 8Mar2011- | 2536  | 504.29  | 0.44639  | 3 R.K+14.016 chr5@1326   | 3.04E-11 | 9.54E-04 |
| 8Mar2011- | 6066  | 843.91  | 2.027504 | 2 R.ADALYNF Splice@chr   | 1.62E-17 | 0        |
| 8Mar2011- | 7170  | 652.35  | 9.426525 | 2 K.NGGRDSI chr2@1006    | 6.91E-11 | 0.00274  |
| 8Mar2011- | 6736  | 787.43  | -1.78505 | 1 K.SDAAPAK chrX@8018    | 3.31E-10 | 0.007678 |
| 8Mar2011- | 1879  | 748.36  | 16.41564 | 1 R.ATAGDGI chr3@5843    | 3.04E-12 | 1.52E-04 |

|           |       |         |          |                         |          |          |
|-----------|-------|---------|----------|-------------------------|----------|----------|
| 8Mar2011- | 15242 | 622.33  | 9.587405 | 2 R.AK+14.01 chr2@4270  | 2.97E-10 | 0.007271 |
| 8Mar2011- | 6343  | 494.59  | -21.6808 | 3 K.FPENRHI chr2@1477   | 1.68E-10 | 0.004891 |
| 8Mar2011- | 6344  | 741.39  | -17.2291 | 2 K.QKSNWH chr5@1229    | 1.69E-11 | 5.74E-04 |
| 8Mar2011- | 21086 | 909.22  | -1.99927 | 4 R.RTSDSMI chr4@6771   | 6.67E-11 | 0.00274  |
| 8Mar2011- | 7780  | 880.44  | 26.72084 | 1 R.FQGNTGI chrX@1738   | 5.40E-11 | 0.001466 |
| 8Mar2011- | 7915  | 434.24  | 13.9946  | 3 _RSNDQTI chr5@6378    | 4.34E-10 | 0.009741 |
| 8Mar2011- | 19463 | 795.66  | -2.97654 | 4 K.SGTIFDNI Splice@chr | 8.79E-15 | 0        |
| 8Mar2011- | 15347 | 490.74  | -7.60235 | 2 K.DITMEIM chr3@1481   | 1.10E-10 | 0.003415 |
| 8Mar2011- | 1658  | 541.25  | -16.4944 | 2 K.MFGEQLI chr5@1742   | 1.33E-10 | 0.003984 |
| 8Mar2011- | 19723 | 777.08  | 13.6322  | 3 Q.EPVEDGI Splice@chr  | 1.00E-11 | 2.98E-04 |
| 8Mar2011- | 15556 | 759.4   | -15.0495 | 2 K.FIDANLQ chr4@8206   | 1.54E-10 | 0.004683 |
| 8Mar2011- | 16980 | 899.47  | 5.842265 | 2 R.SKNK+14 chrX@1700   | 3.15E-10 | 0.007489 |
| 8Mar2011- | 3090  | 446.77  | 19.99118 | 2 R.PVFSITTK chrX@1588  | 2.04E-10 | 0.005672 |
| 8Mar2011- | 18866 | 805.47  | -13.7324 | 2 K.TPIFIPAP chr5@1861  | 1.18E-10 | 0.003526 |
| 8Mar2011- | 6405  | 741.39  | -17.2291 | 2 K.QKSNWH chr5@1229    | 3.52E-11 | 9.54E-04 |
| 8Mar2011- | 2005  | 459.25  | 4.002563 | 2 R.AIQSASSI chr2@1035  | 1.28E-10 | 0.003753 |
| 8Mar2011- | 19470 | 1060.54 | -6.74128 | 3 K.SGTIFDNI Splice@chr | 1.03E-13 | 0        |
| 8Mar2011- | 1864  | 422.27  | 2.173301 | 2 K.IGKGEVLI chrX@1204  | 4.27E-10 | 0.009528 |
| 8Mar2011- | 371   | 501.07  | 8.971133 | 4 R.KKLMMK chr5@1910    | 3.90E-10 | 0.008642 |
| 8Mar2011- | 7288  | 435.25  | -4.00582 | 2 K.KISAHGTI chr4@1727  | 1.77E-10 | 0.005213 |
| 8Mar2011- | 20106 | 1147.25 | 13.44098 | 3 R.FQSAAIG Splice@chr  | 4.38E-12 | 1.52E-04 |
| 8Mar2011- | 15392 | 1153.23 | -17.5731 | 3 F.EGIRTGG Splice@chr  | 2.77E-15 | 0        |
| 8Mar2011- | 11565 | 554.84  | -0.66123 | 2 L.LVDLALHI chrX@1544  | 2.95E-10 | 0.007271 |
| 8Mar2011- | 8592  | 717.89  | -17.2831 | 2 K.LRGWNK chr3@8881    | 2.96E-10 | 0.007271 |
| 8Mar2011- | 10974 | 595.33  | 16.43181 | 3 R.DECYASK Splice@chr  | 1.30E-10 | 0.003875 |
| 8Mar2011- | 20123 | 688.75  | 8.895763 | 5 R.FQSAAIG Splice@chr  | 7.61E-11 | 0.002972 |
| 8Mar2011- | 19379 | 795.65  | -15.5001 | 4 K.SGTIFDNI Splice@chr | 7.10E-15 | 0        |
| 8Mar2011- | 19386 | 1060.54 | -6.74128 | 3 K.SGTIFDNI Splice@chr | 1.13E-14 | 0        |
| 8Mar2011- | 20141 | 860.69  | 14.08015 | 4 R.FQSAAIG Splice@chr  | 1.16E-14 | 0        |
| 8Mar2011- | 8105  | 458.27  | 25.05788 | 2 _NGGGDLI chr2@1095    | 4.32E-10 | 0.009741 |
| 8Mar2011- | 799   | 501.07  | 8.971133 | 4 R.KKLMMK chr5@1910    | 4.02E-10 | 0.008642 |
| 8Mar2011- | 20605 | 1040.9  | 3.834672 | 3 E.LFQIIVM chr2@1065   | 5.34E-11 | 0.001466 |
| 8Mar2011- | 19439 | 795.66  | -2.97654 | 4 K.SGTIFDNI Splice@chr | 1.14E-14 | 0        |
| 8Mar2011- | 19445 | 1060.54 | -6.74128 | 3 K.SGTIFDNI Splice@chr | 6.45E-14 | 0        |
| 8Mar2011- | 19692 | 777.08  | 13.6322  | 3 Q.EPVEDGI Splice@chr  | 1.76E-11 | 5.74E-04 |
| 8Mar2011- | 14521 | 833.94  | 2.824179 | 2 _IIEPYVAM Splice@chr  | 3.25E-10 | 0.007678 |
| 8Mar2011- | 19849 | 1060.54 | -6.74128 | 3 K.SGTIFDNI Splice@chr | 8.20E-13 | 0        |
| 8Mar2011- | 8160  | 634.87  | 13.67349 | 2 R.IQKCHTLI Splice@chr | 2.71E-10 | 0.007079 |
| 8Mar2011- | 979   | 743.48  | 2.794988 | 1 K.KIGGAGII chr1@2885  | 8.66E-11 | 0.00321  |
| 8Mar2011- | 19282 | 795.65  | -15.5001 | 4 K.SGTIFDNI Splice@chr | 4.20E-17 | 0        |
| 8Mar2011- | 4147  | 789.44  | 17.96022 | 1 R.FAAPLDR chr3@8971   | 3.63E-10 | 0.008338 |
| 8Mar2011- | 19870 | 1060.54 | -6.74128 | 3 K.SGTIFDNI Splice@chr | 4.06E-14 | 0        |
| 8Mar2011- | 19869 | 795.65  | -15.5001 | 4 K.SGTIFDNI Splice@chr | 7.93E-16 | 0        |
| 8Mar2011- | 20675 | 760.41  | 9.033528 | 3 _TQTNTKI chrX@7978    | 4.31E-11 | 0.001079 |
| 8Mar2011- | 19259 | 1060.54 | -6.74128 | 3 K.SGTIFDNI Splice@chr | 1.08E-15 | 0        |
| 8Mar2011- | 18967 | 795.66  | -2.97654 | 4 K.SGTIFDNI Splice@chr | 1.81E-12 | 0        |
| 8Mar2011- | 6252  | 748.4   | -14.2094 | 2 K.QKSNWH chr5@1229    | 3.82E-11 | 7.19E-04 |

|           |       |         |          |                          |          |          |
|-----------|-------|---------|----------|--------------------------|----------|----------|
| 8Mar2011- | 19123 | 1060.54 | -6.74128 | 3 K.SGTIFDNI Splice@chr  | 4.07E-15 | 0        |
| 8Mar2011- | 19122 | 795.66  | -10.8901 | 4 K.SGTIFDNI Splice@chr  | 4.76E-16 | 0        |
| 8Mar2011- | 17821 | 895.79  | 10.03186 | 3 _ .RELTEEDI Splice@chr | 3.31E-11 | 7.19E-04 |
| 8Mar2011- | 13771 | 664.7   | 1.197202 | 3 _ .PTLNK+1 chr1@6526   | 5.89E-12 | 1.31E-04 |
| 8Mar2011- | 5441  | 741.39  | -17.2291 | 2 K.QKSNWH chr5@1229     | 5.07E-11 | 0.001182 |
| 8Mar2011- | 19734 | 1060.54 | -6.74128 | 3 K.SGTIFDNI Splice@chr  | 1.16E-15 | 0        |
| 8Mar2011- | 19730 | 795.66  | -2.97654 | 4 K.SGTIFDNI Splice@chr  | 7.60E-17 | 0        |
| 8Mar2011- | 19929 | 799.16  | -7.85909 | 4 K.SGTIFDNI Splice@chr  | 2.36E-13 | 0        |
| 8Mar2011- | 18505 | 805.97  | -15.8175 | 2 K.TPIFIPAP chr5@1861   | 7.51E-11 | 0.001844 |
| 8Mar2011- | 12632 | 556.86  | -10.3839 | 2 R.QNKIVLI Splice@chr   | 1.55E-10 | 0.002969 |
| 8Mar2011- | 2278  | 446.77  | 19.99118 | 2 R.PVFSITTK chrX@1588   | 3.09E-10 | 0.007477 |
| 8Mar2011- | 18523 | 634.84  | 6.410455 | 2 R.VDIGDILF Splice@chr  | 7.61E-13 | 0        |
| 8Mar2011- | 13467 | 855.41  | -22.1447 | 2 _ .HVQEVAI Splice@chr  | 1.49E-11 | 6.14E-04 |
| 8Mar2011- | 16171 | 1167.56 | -16.7225 | 2 L.K+14.016 Splice@chr  | 2.80E-11 | 6.14E-04 |
| 8Mar2011- | 11536 | 613.85  | -9.85967 | 2 R.QITLK+14 chr5@7614   | 3.50E-10 | 0.008051 |
| 8Mar2011- | 20639 | 783.75  | 7.307848 | 3 K.INWAVTI chr4@2890    | 1.52E-15 | 0        |
| 8Mar2011- | 15194 | 575.97  | 16.41892 | 3 K.TSASGEE Splice@chr   | 3.98E-10 | 0.009329 |
| 8Mar2011- | 5819  | 741.39  | -17.2291 | 2 K.QKSNWH chr5@1229     | 1.38E-11 | 5.17E-04 |
| 8Mar2011- | 17845 | 694.87  | 2.550973 | 2 K.YHNITLQ chrX@3836    | 2.25E-10 | 0.005567 |
| 8Mar2011- | 5405  | 439.76  | 15.37198 | 2 K.LYGEVGL chrX@2908    | 3.30E-10 | 0.007952 |
| 8Mar2011- | 14660 | 965.77  | 16.46969 | 4 R.KTSSCQK chr5@2085    | 1.20E-10 | 0.002671 |
| 8Mar2011- | 11691 | 682.33  | -11.6457 | 2 P.LSSWNVF Splice@chr   | 1.24E-10 | 0.002671 |
| 8Mar2011- | 10032 | 595.33  | 16.43181 | 3 R.DECYASK Splice@chr   | 1.58E-11 | 6.14E-04 |
| 8Mar2011- | 11750 | 671.37  | -24.0361 | 2 T.FNIVHTQ Splice@chr   | 2.52E-10 | 0.005854 |
| 8Mar2011- | 17255 | 965.48  | -19.9748 | 2 _ .RFAEFAG chr2@1518   | 5.77E-11 | 0.001522 |
| 8Mar2011- | 4153  | 879.47  | -27.3047 | 1 _ .YEVNVKK chr2@1419   | 2.38E-10 | 0.005658 |
| 8Mar2011- | 18547 | 805.47  | -13.7324 | 2 K.TPIFIPAP chr5@1861   | 2.90E-10 | 0.007187 |
| 8Mar2011- | 8385  | 1086.02 | 18.22629 | 2 V.CLTEEGK Splice@chr   | 4.33E-12 | 0        |
| 8Mar2011- | 14186 | 622.34  | 25.711   | 2 R.AK+14.01 chr2@4270   | 1.61E-10 | 0.003077 |
| 8Mar2011- | 15774 | 848.97  | 0.791766 | 2 R.LLELAPT chr2@6685    | 4.07E-16 | 0        |
| 8Mar2011- | 18931 | 1060.54 | -6.74128 | 3 K.SGTIFDNI Splice@chr  | 4.35E-13 | 0        |
| 8Mar2011- | 913   | 570.32  | 28.62551 | 2 R.KK+14.01 chrX@1720   | 4.23E-10 | 0.009607 |
| 8Mar2011- | 341   | 501.07  | 8.971133 | 4 R.KKLMMK chr5@1910     | 2.22E-10 | 0.005567 |
| 8Mar2011- | 8359  | 724.35  | 19.12636 | 3 V.CLTEEGK Splice@chr   | 1.66E-10 | 0.003506 |
| 8Mar2011- | 18561 | 634.84  | 6.410455 | 2 R.VDIGDILF Splice@chr  | 2.11E-12 | 0        |
| 8Mar2011- | 11980 | 694.54  | 11.7794  | 5 _ .HTGPGVI Splice@chr  | 8.02E-11 | 0.001951 |
| 8Mar2011- | 20638 | 1175.13 | 14.90082 | 2 K.INWAVTI chr4@2890    | 7.32E-22 | 0        |
| 8Mar2011- | 20387 | 960.16  | -0.50908 | 3 N.GFEPRLA Splice@chr   | 3.33E-11 | 7.19E-04 |
| 8Mar2011- | 19700 | 1060.54 | -6.74128 | 3 K.SGTIFDNI Splice@chr  | 1.17E-13 | 0        |
| 8Mar2011- | 14518 | 759.4   | -15.0495 | 2 K.FIDANLQ chr4@8206    | 1.87E-10 | 0.003804 |
| 8Mar2011- | 8590  | 1086.02 | 18.22629 | 2 V.CLTEEGK Splice@chr   | 6.48E-11 | 0.00163  |
| 8Mar2011- | 17831 | 1007.86 | 15.19559 | 3 R.CWNRRA Splice@chr    | 4.40E-11 | 8.36E-04 |
| 8Mar2011- | 8588  | 724.35  | 19.12636 | 3 V.CLTEEGK Splice@chr   | 4.18E-13 | 0        |
| 8Mar2011- | 6025  | 626.3   | -9.76097 | 2 R.LCESGAA Splice@chr   | 4.88E-16 | 0        |
| 8Mar2011- | 13412 | 855.41  | -22.1447 | 2 _ .HVQEVAI Splice@chr  | 1.59E-10 | 0.002969 |
| 8Mar2011- | 919   | 516.34  | 12.50968 | 2 R.KKMQIK chr2@9076     | 3.11E-10 | 0.00757  |
| 8Mar2011- | 406   | 460.28  | 12.64137 | 2 R.AKNTAKS chr1@7641    | 4.39E-10 | 0.009896 |

|           |       |         |          |                         |          |          |
|-----------|-------|---------|----------|-------------------------|----------|----------|
| 8Mar2011- | 17291 | 987.51  | 4.289691 | 3 K.KYLFLDNI chr4@1288  | 2.36E-10 | 0.005658 |
| 8Mar2011- | 20077 | 688.75  | 8.895763 | 5 R.FQSAAIG Splice@chr  | 3.71E-10 | 0.008744 |
| 8Mar2011- | 19321 | 1159.62 | 2.451592 | 2 I.K+14.016' chrX@7012 | 3.95E-10 | 0.009229 |
| 8Mar2011- | 15397 | 747.39  | 13.7081  | 2 K.MLRFNEC chr2@8355   | 6.39E-11 | 0.00163  |
| 8Mar2011- | 17245 | 987.5   | -5.85708 | 3 K.KYLFLDNI chr4@1288  | 6.97E-11 | 0.001844 |
| 8Mar2011- | 13331 | 607     | -9.70672 | 3 I.NRFNISK chrX@1250   | 1.40E-10 | 0.00287  |
| 8Mar2011- | 7384  | 533.82  | 16.26677 | 2 K.TNIYTILTI chr5@1329 | 1.05E-10 | 0.002593 |
| 8Mar2011- | 19385 | 1159.62 | 2.451592 | 2 I.K+14.016' chrX@7012 | 3.77E-10 | 0.008942 |
| 8Mar2011- | 10699 | 1075.06 | -6.79295 | 2 R.TCSK+14. chr2@1253  | 2.02E-10 | 0.004537 |
| 8Mar2011- | 11033 | 657.04  | -26.9179 | 3 R.GNVRK+1 chrX@7490   | 5.35E-11 | 0.001295 |
| 8Mar2011- | 19096 | 984.82  | -14.7074 | 3 K.SGTIFDNI Splice@chr | 2.34E-10 | 0.005658 |
| 8Mar2011- | 14739 | 1004.98 | -4.74188 | 2 K.KVELALW Splice@chr  | 9.61E-20 | 0        |
| 8Mar2011- | 5493  | 741.39  | -17.2291 | 2 K.QKSNWH chr5@1229    | 2.39E-11 | 6.14E-04 |
| 8Mar2011- | 196   | 420.72  | 12.72454 | 2 _RYTDTGK chr1@7224    | 4.41E-10 | 0.009993 |
| 8Mar2011- | 1530  | 446.28  | 11.92556 | 2 R.HLALPNV chr5@8698   | 2.30E-10 | 0.005567 |
| 8Mar2011- | 17189 | 665.37  | -26.6417 | 2 Q.INNK+14 Splice@chr  | 3.70E-10 | 0.008744 |
| 8Mar2011- | 8637  | 724.35  | 19.12636 | 3 V.CLTEEGK Splice@chr  | 3.07E-11 | 7.19E-04 |
| 8Mar2011- | 11089 | 657.04  | -26.9179 | 3 R.GNVRK+1 chrX@7490   | 1.75E-10 | 0.003711 |
| 8Mar2011- | 16482 | 732.07  | 19.51873 | 3 R.ATDDWII Splice@chr  | 1.24E-10 | 0.002671 |
| 8Mar2011- | 4218  | 439.91  | 17.33685 | 3 K.NSQKNPI chr2@3540   | 4.37E-10 | 0.009896 |
| 8Mar2011- | 18927 | 795.66  | -2.97654 | 4 K.SGTIFDNI Splice@chr | 4.43E-16 | 0        |
| 8Mar2011- | 19159 | 795.66  | -2.97654 | 4 K.SGTIFDNI Splice@chr | 3.12E-15 | 0        |
| 8Mar2011- | 19160 | 1060.54 | -6.74128 | 3 K.SGTIFDNI Splice@chr | 1.11E-14 | 0        |
| 8Mar2011- | 724   | 403.23  | 10.8661  | 2 R.AMVASG chr5@1721    | 2.61E-10 | 0.006059 |
| 8Mar2011- | 6557  | 617.33  | 16.27136 | 1 R.NVGGGG Splice@chr   | 1.81E-10 | 0.003804 |
| 8Mar2011- | 15081 | 575.97  | 16.41892 | 3 K.TSASGEE Splice@chr  | 4.08E-10 | 0.009508 |
| 8Mar2011- | 14685 | 1004.97 | -14.712  | 2 K.KVELALW Splice@chr  | 1.33E-22 | 0        |
| 8Mar2011- | 15628 | 1108.93 | -3.30537 | 3 F.PETHVLA chr5@6493   | 1.83E-10 | 0.003804 |
| 8Mar2011- | 2886  | 819.43  | 10.73915 | 1 R.EATETIR. chrX@2916  | 2.61E-10 | 0.006059 |
| 8Mar2011- | 6895  | 693.87  | -6.6949  | 2 V.ICVAVGD chr5@1063   | 4.88E-11 | 9.49E-04 |
| 8Mar2011- | 14414 | 1156.89 | 7.624255 | 3 _HTGPGVI Splice@chr   | 7.79E-12 | 2.71E-04 |
| 8Mar2011- | 22022 | 783.75  | 7.307848 | 3 K.INWAVTI chr4@2890   | 2.04E-15 | 0        |
| 8Mar2011- | 12365 | 1075.06 | -6.79295 | 2 R.TCSK+14. chr2@1253  | 2.89E-10 | 0.00701  |
| 8Mar2011- | 4702  | 414.74  | -1.18019 | 2 R.FAAAHLA chrX@1289   | 2.55E-10 | 0.006407 |
| 8Mar2011- | 14948 | 1005.16 | -21.3951 | 3 L.LTTCNRRI Splice@chr | 4.72E-11 | 0.001821 |
| 8Mar2011- | 15726 | 938.46  | 22.50833 | 2 R.ECSQSDS chr2@8876   | 2.41E-10 | 0.006333 |
| 8Mar2011- | 15526 | 858.48  | 6.006088 | 3 _LETGIKPI Splice@chr  | 1.56E-11 | 6.52E-04 |
| 8Mar2011- | 9032  | 460.26  | 4.392893 | 2 K.YPGIGGI chr5@1660   | 3.99E-11 | 0.001603 |
| 8Mar2011- | 4787  | 510.3   | 12.8833  | 2 R.RHVAYVF chr1@1479   | 2.63E-10 | 0.006606 |
| 8Mar2011- | 2367  | 748.36  | 16.41564 | 1 R.ATAGDGI chr3@5843   | 1.19E-10 | 0.004111 |
| 8Mar2011- | 18167 | 1187.58 | 10.28775 | 3 R.NGAPPSC Splice@chr  | 2.91E-10 | 0.007103 |
| 8Mar2011- | 21821 | 960.48  | -15.5897 | 3 N.GFEPRLA Splice@chr  | 2.76E-10 | 0.006809 |
| 8Mar2011- | 4426  | 498.58  | 26.57833 | 3 R.SQYLQM Splice@chr   | 3.19E-10 | 0.007392 |
| 8Mar2011- | 13963 | 881.92  | -2.80647 | 2 F.LQEQGTY Splice@chr  | 2.73E-11 | 0.001133 |
| 8Mar2011- | 7540  | 626.3   | -9.76097 | 2 R.LCESGAA Splice@chr  | 7.26E-16 | 0        |
| 8Mar2011- | 8702  | 895.51  | -6.04083 | 2 _SGISIEVN Splice@chr  | 1.02E-10 | 0.003812 |
| 8Mar2011- | 2625  | 873.51  | -11.1925 | 1 R.QLGFPIAI chr3@2252  | 3.15E-10 | 0.007392 |

|           |       |         |          |                         |          |          |
|-----------|-------|---------|----------|-------------------------|----------|----------|
| 8Mar2011- | 20348 | 634.84  | 6.410455 | 2 R.VDIGDILF Splice@chr | 1.43E-12 | 0        |
| 8Mar2011- | 5250  | 634.87  | 13.67349 | 2 R.IQKCHTLI Splice@chr | 1.99E-10 | 0.005837 |
| 8Mar2011- | 14892 | 1005.16 | -21.3951 | 3 L.LTTCNRRI Splice@chr | 2.54E-11 | 0.001133 |
| 8Mar2011- | 4730  | 510.3   | 12.8833  | 2 R.RHVAYVF chr1@1479   | 1.31E-10 | 0.004432 |
| 8Mar2011- | 9377  | 1025.61 | -11.6755 | 1 K.LGLGSGL chr5@4949   | 9.81E-12 | 2.71E-04 |
| 8Mar2011- | 7192  | 741.39  | -17.2291 | 2 K.QKSNWH chr5@1229    | 1.18E-11 | 4.03E-04 |
| 8Mar2011- | 17914 | 991.51  | 24.02083 | 3 _IYVPADD Splice@chr   | 4.27E-16 | 0        |
| 8Mar2011- | 4476  | 498.58  | 26.57833 | 3 R.SQYLQM Splice@chr   | 3.24E-10 | 0.00771  |
| 8Mar2011- | 9233  | 717.89  | -17.2831 | 2 K.LRGWNK chr3@8881    | 1.67E-10 | 0.004924 |
| 8Mar2011- | 21549 | 1147.25 | 13.44098 | 3 R.FQSAAG Splice@chr   | 9.85E-15 | 0        |
| 8Mar2011- | 2670  | 801.46  | -26.9469 | 1 K.WAGVVL chr4@3669    | 2.06E-10 | 0.005837 |
| 8Mar2011- | 19259 | 895.78  | -1.06827 | 3 _RELTEEDI Splice@chr  | 6.18E-12 | 2.71E-04 |
| 8Mar2011- | 4648  | 414.74  | -1.18019 | 2 R.FAAAHLA chrX@1289   | 1.37E-10 | 0.004642 |
| 8Mar2011- | 19304 | 895.78  | -1.06827 | 3 _RELTEEDI Splice@chr  | 4.21E-12 | 1.45E-04 |
| 8Mar2011- | 8984  | 534.32  | 13.11853 | 2 K.TNIYTILTI chr5@1329 | 1.52E-10 | 0.004838 |
| 8Mar2011- | 16633 | 1004.97 | -14.712  | 2 K.KVELALW Splice@chr  | 2.34E-22 | 0        |
| 8Mar2011- | 20827 | 795.65  | -15.5001 | 4 K.SGTIFDNI Splice@chr | 4.69E-15 | 0        |
| 8Mar2011- | 19641 | 1007.86 | 15.19559 | 3 R.CWNRRA Splice@chr   | 9.75E-11 | 0.003596 |
| 8Mar2011- | 21293 | 1060.55 | 2.708983 | 3 K.SGTIFDNI Splice@chr | 1.24E-10 | 0.004219 |
| 8Mar2011- | 13861 | 1156.9  | 16.3571  | 3 _HTGPGVI Splice@chr   | 1.39E-16 | 0        |
| 8Mar2011- | 13860 | 694.54  | 11.7794  | 5 _HTGPGVI Splice@chr   | 2.76E-10 | 0.006809 |
| 8Mar2011- | 2231  | 422.27  | 2.173301 | 2 K.IGKGEVLI chrX@1204  | 3.31E-10 | 0.00792  |
| 8Mar2011- | 6718  | 462.25  | 15.3693  | 2 K.SFPGGKS chr2@1139   | 3.37E-10 | 0.008019 |
| 8Mar2011- | 16161 | 1062.55 | 11.64973 | 2 _RRSLKIAC chr1@9149   | 1.34E-11 | 5.33E-04 |
| 8Mar2011- | 16206 | 1062.56 | 21.08375 | 2 _RRSLKIAC chr1@9149   | 1.12E-11 | 4.03E-04 |
| 8Mar2011- | 6792  | 741.39  | -17.2291 | 2 K.QKSNWH chr5@1229    | 3.10E-11 | 0.001252 |
| 8Mar2011- | 21164 | 777.08  | 13.6322  | 3 Q.EPVEDGI Splice@chr  | 1.42E-11 | 6.52E-04 |
| 8Mar2011- | 5063  | 517.34  | 25.61989 | 2 R.KMLRMII chr1@1158   | 2.98E-10 | 0.007103 |
| 8Mar2011- | 21981 | 760.41  | 9.033528 | 3 _TQTNTKI\ chrX@7978   | 1.18E-10 | 0.004111 |
| 8Mar2011- | 19617 | 895.78  | -1.06827 | 3 _RELTEEDI Splice@chr  | 8.35E-12 | 2.71E-04 |
| 8Mar2011- | 1517  | 419.23  | -7.22396 | 2 R.RSPELVH chr5@4179   | 3.39E-10 | 0.008217 |
| 8Mar2011- | 17960 | 991.51  | 24.02083 | 3 _IYVPADD Splice@chr   | 3.57E-15 | 0        |
| 8Mar2011- | 8747  | 533.82  | 16.26677 | 2 K.TNIYTILTI chr5@1329 | 2.49E-10 | 0.006407 |
| 8Mar2011- | 2327  | 748.36  | 16.41564 | 1 R.ATAGDGI chr3@5849   | 5.92E-12 | 2.71E-04 |
| 8Mar2011- | 13920 | 1156.9  | 16.3571  | 3 _HTGPGVI Splice@chr   | 3.17E-16 | 0        |
| 8Mar2011- | 7957  | 869.49  | -11.1741 | 1 R.KIGHTW\ chr3@5992   | 3.39E-10 | 0.008217 |
| 8Mar2011- | 7292  | 741.39  | -17.2291 | 2 K.QKSNWH chr5@1229    | 5.77E-11 | 0.002394 |
| 8Mar2011- | 2292  | 748.36  | 16.41564 | 1 R.ATAGDGI chr3@5849   | 3.04E-12 | 1.45E-04 |
| 8Mar2011- | 1497  | 425.22  | -10.657  | 2 K.HLNEHA\ chr5@5137   | 4.16E-10 | 0.009923 |
| 8Mar2011- | 7661  | 748.39  | -27.6021 | 2 K.QKSNWH chr5@1229    | 1.78E-11 | 6.52E-04 |
| 8Mar2011- | 7665  | 716.4   | 8.019867 | 1 K.LAANA\ chr5@1339    | 2.44E-10 | 0.006407 |
| 8Mar2011- | 20306 | 634.84  | 6.410455 | 2 R.VDIGDILF Splice@chr | 1.72E-12 | 1.45E-04 |
| 8Mar2011- | 6908  | 741.39  | -17.2291 | 2 K.QKSNWH chr5@1229    | 1.79E-11 | 6.52E-04 |
| 8Mar2011- | 8468  | 434.24  | 13.9946  | 3 _RSNDQTI chr5@6378    | 2.56E-10 | 0.006407 |
| 8Mar2011- | 8582  | 434.24  | 13.9946  | 3 _RSNDQTI chr5@6378    | 3.82E-10 | 0.009232 |
| 8Mar2011- | 18905 | 746.91  | 13.99266 | 2 V.EK+14.01 Splice@chr | 2.23E-11 | 0.001024 |
| 8Mar2011- | 14077 | 765.9   | -6.7028  | 4 R.SK+14.01 chr4@1006  | 9.47E-12 | 2.71E-04 |

|           |       |         |          |                          |          |          |
|-----------|-------|---------|----------|--------------------------|----------|----------|
| 8Mar2011- | 7244  | 741.39  | -17.2291 | 2 K.QKSNWH chr5@1229     | 1.45E-11 | 6.52E-04 |
| 8Mar2011- | 15175 | 618.32  | 1.155298 | 3 K.LTNLSTA' Splice@chr  | 1.16E-10 | 0.004111 |
| 8Mar2011- | 13996 | 1185.93 | -27.6085 | 3 _..NNQMY Y chr5@1745   | 4.05E-10 | 0.009725 |
| 8Mar2011- | 15261 | 607     | -9.70672 | 3 I.NRFNISK chrX@1250    | 1.37E-10 | 0.004642 |
| 8Mar2011- | 19020 | 665.37  | -26.6417 | 2 Q.INNK+14 Splice@chr   | 4.17E-10 | 0.009923 |
| 8Mar2011- | 1443  | 743.48  | 2.794988 | 1 K.KIGGAGII chr1@2885   | 1.73E-10 | 0.005136 |
| 8Mar2011- | 2406  | 748.36  | 16.41564 | 1 R.ATAGDGI chr3@5845    | 1.56E-12 | 1.45E-04 |
| 8Mar2011- | 16832 | 888.46  | 11.62323 | 2 K.DITLEVEA' Splice@chr | 1.97E-13 | 0        |
| 8Mar2011- | 7614  | 748.39  | -27.6021 | 2 K.QKSNWH chr5@1229     | 2.11E-11 | 0.001024 |
| 8Mar2011- | 22249 | 760.41  | 9.033528 | 3 _..TQTNTKI' chrX@7978  | 1.32E-10 | 0.004432 |
| 8Mar2011- | 4373  | 657.41  | 7.996722 | 1 R.GALVAAF chr4@4658    | 1.81E-10 | 0.005337 |
| 8Mar2011- | 6848  | 741.39  | -17.2291 | 2 K.QKSNWH chr5@1229     | 4.53E-11 | 0.001821 |
| 8Mar2011- | 12196 | 1162.23 | 14.80982 | 3 _..HTGPGVI Splice@chr  | 1.69E-13 | 0        |
| 8Mar2011- | 20789 | 1060.54 | -6.74128 | 3 K.SGTIFDNI Splice@chr  | 3.74E-14 | 0        |
| 8Mar2011- | 20795 | 795.66  | -2.97654 | 4 K.SGTIFDNI Splice@chr  | 4.15E-15 | 0        |
| 8Mar2011- | 22013 | 1175.12 | 6.371728 | 2 K.INWAVTI chr4@2890    | 1.01E-23 | 0        |
| 8Mar2011- | 20690 | 1060.54 | -6.74128 | 3 K.SGTIFDNI Splice@chr  | 7.48E-15 | 0        |
| 8Mar2011- | 10466 | 725.88  | 19.33943 | 2 R.MEHLCRI Splice@chr   | 1.90E-10 | 0.00565  |
| 8Mar2011- | 5882  | 412.56  | -22.1132 | 3 _..NPRGKKC Splice@chr  | 3.86E-10 | 0.009329 |
| 8Mar2011- | 7485  | 626.3   | -9.76097 | 2 R.LCESGAA Splice@chr   | 1.47E-16 | 0        |
| 8Mar2011- | 21127 | 777.08  | 13.6322  | 3 Q.EPVEDGI Splice@chr   | 4.69E-11 | 0.001821 |
| 8Mar2011- | 21575 | 1147.25 | 13.44098 | 3 R.FQSAAG Splice@chr    | 1.97E-16 | 0        |
| 8Mar2011- | 18967 | 789.39  | 21.40369 | 3 R.LK+14.01 chrX@1771   | 3.02E-10 | 0.007103 |
| 8Mar2011- | 18155 | 1167.55 | -25.3067 | 2 L.K+14.016 Splice@chr  | 1.74E-10 | 0.005136 |
| 8Mar2011- | 19653 | 895.78  | -1.06827 | 3 _..RELTEEDI Splice@chr | 1.41E-12 | 0        |
| 8Mar2011- | 11880 | 671.37  | -24.0361 | 2 T.FNIVHTQ Splice@chr   | 2.43E-10 | 0.006838 |
| 8Mar2011- | 9945  | 509.3   | -20.473  | 2 R.SSVIMLIV chr2@5767   | 1.11E-10 | 0.003884 |
| 8Mar2011- | 1466  | 422.27  | 2.173301 | 2 K.IGKGEVLI chrX@1204   | 1.03E-10 | 0.003627 |
| 8Mar2011- | 3409  | 557.84  | 24.08391 | 2 R.EVIKHFN' chrX@9231   | 1.38E-10 | 0.004736 |
| 8Mar2011- | 15402 | 769.42  | -23.8029 | 2 K.KEK+14.0 chr2@5601   | 2.54E-10 | 0.007447 |
| 8Mar2011- | 16745 | 732.07  | 19.51873 | 3 R.ATDDWII Splice@chr   | 4.52E-11 | 0.001275 |
| 8Mar2011- | 21265 | 536.62  | 14.78682 | 3 K.FLYIPAFY chr5@8768   | 1.46E-10 | 0.005078 |
| 8Mar2011- | 17595 | 895.78  | -1.06827 | 3 _..RELTEEDI Splice@chr | 2.24E-13 | 0        |
| 8Mar2011- | 20271 | 931.83  | -23.7659 | 3 K.MQNLDL Splice@chr    | 1.48E-11 | 3.03E-04 |
| 8Mar2011- | 10501 | 663.85  | -5.06443 | 2 N.KMIFSMI chr4@8622    | 1.76E-10 | 0.005168 |
| 8Mar2011- | 10853 | 1161.89 | 10.02469 | 3 _..HTGPGVI Splice@chr  | 1.75E-11 | 4.42E-04 |
| 8Mar2011- | 6212  | 741.39  | -17.2291 | 2 K.QKSNWH chr5@1229     | 1.48E-11 | 3.03E-04 |
| 8Mar2011- | 3002  | 452.23  | -1.48793 | 2 R.SGEPLSA' Splice@chr  | 2.99E-11 | 0.001014 |
| 8Mar2011- | 5783  | 494.59  | -21.6808 | 3 K.FPENRHI, chr2@1477   | 1.15E-10 | 0.004274 |
| 8Mar2011- | 5330  | 1068.56 | 13.79386 | 1 R.FMRGAA chr1@8018     | 2.49E-10 | 0.007447 |
| 8Mar2011- | 6111  | 741.39  | -17.2291 | 2 K.QKSNWH chr5@1229     | 3.59E-11 | 0.001148 |
| 8Mar2011- | 5698  | 439.75  | -7.44254 | 2 K.LYGEVGL chrX@2908    | 2.65E-10 | 0.007678 |
| 8Mar2011- | 672   | 629.4   | 2.233974 | 1 K.LAVAGAK Splice@chr   | 2.54E-10 | 0.007447 |
| 8Mar2011- | 16423 | 879.14  | -17.6078 | 3 R.GMDKVR chr5@1677     | 2.63E-10 | 0.007555 |
| 8Mar2011- | 15414 | 1165.11 | -13.2959 | 2 R.RCERRGS chr4@1406    | 4.47E-11 | 0.001275 |
| 8Mar2011- | 11592 | 583.83  | -11.3703 | 2 R.LVFPITFS chr1@2422   | 3.29E-10 | 0.009445 |
| 8Mar2011- | 16394 | 1187.58 | 10.28775 | 3 R.NGAPPSC Splice@chr   | 1.88E-10 | 0.005544 |

|           |       |         |          |                         |          |          |
|-----------|-------|---------|----------|-------------------------|----------|----------|
| 8Mar2011- | 3258  | 562.31  | -13.4391 | 2 R.FYLLYLYK Splice@chr | 5.67E-11 | 0.001817 |
| 8Mar2011- | 5842  | 741.39  | -17.2291 | 2 K.QKSNWH chr5@1229    | 5.32E-11 | 0.001817 |
| 8Mar2011- | 5841  | 494.59  | -21.6808 | 3 K.FPENRHI chr2@1477   | 2.78E-10 | 0.00803  |
| 8Mar2011- | 13862 | 1030.52 | 12.84278 | 2 L.SPIPEVPC Splice@chr | 1.65E-18 | 0        |
| 8Mar2011- | 20286 | 688.75  | 8.895763 | 5 R.FQSAAIG Splice@chr  | 1.94E-10 | 0.005788 |
| 8Mar2011- | 20280 | 860.69  | 14.08015 | 4 R.FQSAAIG Splice@chr  | 1.09E-14 | 0        |
| 8Mar2011- | 20279 | 1147.25 | 13.44098 | 3 R.FQSAAIG Splice@chr  | 3.55E-17 | 0        |
| 8Mar2011- | 8544  | 435.25  | -4.00582 | 2 K.KISAHGTI chr4@1727  | 3.92E-11 | 0.001275 |
| 8Mar2011- | 13244 | 838.94  | -22.1914 | 2 R.QFADLPS chr5@1898   | 2.08E-10 | 0.005885 |
| 8Mar2011- | 15682 | 747.39  | 13.7081  | 2 K.MLRFNEC chr2@8359   | 1.01E-10 | 0.003627 |
| 8Mar2011- | 17676 | 1003.19 | 17.13413 | 3 R.CWNRRA Splice@chr   | 1.05E-11 | 3.03E-04 |
| 8Mar2011- | 9894  | 509.3   | -20.473  | 2 R.SSVIMLIV chr2@5767  | 8.06E-11 | 0.00313  |
| 8Mar2011- | 6500  | 748.39  | -27.6021 | 2 K.QKSNWH chr5@1229    | 1.25E-11 | 3.03E-04 |
| 8Mar2011- | 12228 | 1156.9  | 16.3571  | 3 _HTGPGVI Splice@chr   | 1.77E-14 | 0        |
| 8Mar2011- | 3420  | 425.25  | -10.7421 | 3 K.K+14.016 chr5@2074  | 2.87E-10 | 0.008136 |
| 8Mar2011- | 5784  | 741.39  | -17.2291 | 2 K.QKSNWH chr5@1229    | 2.84E-11 | 8.72E-04 |
| 8Mar2011- | 14424 | 803.93  | 13.57891 | 2 H.ASSLMIII Splice@chr | 1.49E-10 | 0.005078 |
| 8Mar2011- | 13709 | 607     | -9.70672 | 3 I.NRFNISLK chrX@1250  | 1.12E-10 | 0.004011 |
| 8Mar2011- | 17544 | 895.78  | -1.06827 | 3 _RELTEEDI Splice@chr  | 3.28E-11 | 0.001148 |
| 8Mar2011- | 5735  | 741.39  | -17.2291 | 2 K.QKSNWH chr5@1229    | 4.46E-11 | 0.001275 |
| 8Mar2011- | 1476  | 843.53  | -0.36222 | 1 K.IGKGEVLI chrX@1204  | 2.81E-10 | 0.00803  |
| 8Mar2011- | 6159  | 741.39  | -17.2291 | 2 K.QKSNWH chr5@1229    | 2.85E-11 | 8.72E-04 |
| 8Mar2011- | 15905 | 722.45  | -4.95112 | 2 R.RK+14.01 Splice@chr | 1.55E-10 | 0.005078 |
| 8Mar2011- | 18168 | 1013.54 | -22.3432 | 3 K.ACLNVTY chr4@4860   | 1.97E-10 | 0.005788 |
| 8Mar2011- | 17997 | 895.78  | -1.06827 | 3 _RELTEEDI Splice@chr  | 3.58E-12 | 0        |
| 8Mar2011- | 2898  | 452.23  | -1.48793 | 2 R.SGEPLSA Splice@chr  | 4.78E-11 | 0.001412 |
| 8Mar2011- | 10834 | 871.92  | 9.692321 | 4 _HTGPGVI Splice@chr   | 2.18E-10 | 0.006253 |
| 8Mar2011- | 3052  | 452.23  | -1.48793 | 2 R.SGEPLSA Splice@chr  | 1.82E-10 | 0.005168 |
| 8Mar2011- | 10954 | 1075.06 | -6.79295 | 2 R.TCSK+14. chr2@1259  | 1.47E-10 | 0.005078 |
| 8Mar2011- | 1632  | 746.4   | -13.6079 | 1 R.RAGGGT chr2@7669    | 4.99E-11 | 0.00155  |
| 8Mar2011- | 10898 | 1075.06 | -6.79295 | 2 R.TCSK+14. chr2@1259  | 1.53E-10 | 0.005078 |
| 8Mar2011- | 7260  | 869.49  | -11.1741 | 1 R.KIGHTW chr3@5992    | 3.28E-10 | 0.009445 |
| 8Mar2011- | 18035 | 895.78  | -1.06827 | 3 _RELTEEDI Splice@chr  | 3.95E-13 | 0        |
| 8Mar2011- | 3200  | 915.47  | 1.201399 | 1 K.FHEIGGQ chrX@4727   | 3.37E-11 | 0.001148 |
| 8Mar2011- | 15181 | 575.97  | 5.661636 | 3 R.EEQIIQPC Splice@chr | 1.97E-10 | 0.005788 |
| 8Mar2011- | 18828 | 634.84  | 6.410455 | 2 R.VDIGDILF Splice@chr | 7.77E-12 | 1.58E-04 |
| 8Mar2011- | 9257  | 476.73  | -8.21113 | 2 R.SSHEISHF chr5@1494  | 2.74E-10 | 0.00803  |
| 8Mar2011- | 15147 | 888.47  | 22.8338  | 2 K.DITLEVEA Splice@chr | 1.51E-12 | 0        |
| 8Mar2011- | 9197  | 476.73  | -8.21113 | 2 R.SSHEISHF chr5@1494  | 2.00E-10 | 0.005885 |
| 8Mar2011- | 7594  | 534.32  | 13.11853 | 2 K.TNIYTILTI chr5@1329 | 2.55E-10 | 0.007447 |
| 8Mar2011- | 14774 | 1182.57 | -12.6646 | 1 R.RFAENQI chr5@1779   | 1.28E-10 | 0.004609 |
| 8Mar2011- | 18783 | 634.84  | 6.410455 | 2 R.VDIGDILF Splice@chr | 1.12E-12 | 0        |
| 8Mar2011- | 2969  | 404.54  | 22.99087 | 3 R.CAPSKST chr1@3569   | 5.11E-11 | 0.001746 |
| 8Mar2011- | 7348  | 435.25  | -4.00582 | 2 K.KISAHGTI chr4@1727  | 2.59E-10 | 0.00688  |
| 8Mar2011- | 7884  | 630.86  | 16.57085 | 2 K.SQISQATI Splice@chr | 2.66E-11 | 0.001389 |
| 8Mar2011- | 12021 | 838.94  | -22.1914 | 2 R.QFADLPS chr5@1898   | 3.04E-10 | 0.008639 |
| 8Mar2011- | 16618 | 895.79  | 10.03186 | 3 _RELTEEDI Splice@chr  | 2.62E-12 | 1.65E-04 |

|           |       |         |          |                           |          |          |
|-----------|-------|---------|----------|---------------------------|----------|----------|
| 8Mar2011- | 12624 | 858.48  | 6.006088 | 3 _..LETGIHKP: Splice@chr | 3.05E-11 | 0.001389 |
| 8Mar2011- | 15987 | 665.37  | -26.6417 | 2 Q.INNK+14 Splice@chr    | 3.63E-10 | 0.009988 |
| 8Mar2011- | 4062  | 831.47  | 18.34982 | 2 R.RWM+15 Splice@chr     | 7.26E-11 | 0.002241 |
| 8Mar2011- | 4928  | 741.39  | -17.2291 | 2 K.QKSNWH chr5@1229      | 8.65E-11 | 0.002759 |
| 8Mar2011- | 13461 | 965.52  | 17.33925 | 4 R.K+14.016 chr5@2089    | 3.63E-10 | 0.009988 |
| 8Mar2011- | 2902  | 418.23  | 1.833396 | 2 K.WTTSALF chr5@2081     | 3.35E-10 | 0.009433 |
| 8Mar2011- | 1897  | 915.48  | 12.14748 | 1 K.FHEIGGQ chrX@4727     | 1.37E-10 | 0.004093 |
| 8Mar2011- | 15149 | 1167.56 | -16.7225 | 2 L.K+14.016 Splice@chr   | 7.08E-12 | 6.14E-04 |
| 8Mar2011- | 17300 | 805.47  | -13.7324 | 2 K.TPIFIPAP: chr5@1861   | 1.08E-11 | 0.001033 |
| 8Mar2011- | 12412 | 607     | -9.70672 | 3 I.NRFNISLK chrX@1250    | 1.40E-10 | 0.004183 |
| 8Mar2011- | 16206 | 895.78  | -1.06827 | 3 _..RELTEEDI Splice@chr  | 3.33E-12 | 1.65E-04 |
| 8Mar2011- | 5002  | 741.39  | -17.2291 | 2 K.QKSNWH chr5@1229      | 1.11E-11 | 0.001033 |
| 8Mar2011- | 12556 | 855.91  | -24.1079 | 2 _..HVQEVAI Splice@chr   | 6.03E-14 | 0        |
| 8Mar2011- | 11220 | 1156.9  | 16.3571  | 3 _..HTGPGVI Splice@chr   | 9.71E-17 | 0        |
| 8Mar2011- | 4547  | 741.39  | -17.2291 | 2 K.QKSNWH chr5@1229      | 5.49E-11 | 0.001746 |
| 8Mar2011- | 13995 | 602.99  | -24.0627 | 3 _..QVETILFI chr3@1069   | 2.44E-10 | 0.006528 |
| 8Mar2011- | 10664 | 671.37  | -24.0361 | 2 T.FNIVHTQ Splice@chr    | 1.91E-10 | 0.005249 |
| 8Mar2011- | 5312  | 748.4   | -14.2094 | 2 K.QKSNWH chr5@1229      | 2.32E-11 | 0.001278 |
| 8Mar2011- | 16032 | 756.05  | -0.97004 | 3 _..EM+15.9: chr4@6159   | 3.20E-10 | 0.009331 |
| 8Mar2011- | 18645 | 688.75  | 8.895763 | 5 R.FQSAAIG Splice@chr    | 4.30E-11 | 0.001746 |
| 8Mar2011- | 13642 | 982     | 10.88823 | 2 R.TVMVQN Splice@chr     | 4.21E-17 | 0        |
| 8Mar2011- | 14190 | 829.44  | 22.15469 | 2 R.FADLPFA chr2@1282     | 2.68E-10 | 0.007353 |
| 8Mar2011- | 3365  | 439.91  | 17.33685 | 3 K.NSQKNPI chr2@3540     | 1.72E-10 | 0.004906 |
| 8Mar2011- | 177   | 464.21  | -2.83375 | 2 _..RSSSCSF chr2@1127    | 2.73E-10 | 0.007468 |
| 8Mar2011- | 16131 | 965.49  | -9.59113 | 2 _..RFAEFAG chr2@1518    | 6.65E-12 | 6.14E-04 |
| 8Mar2011- | 19200 | 1040.9  | 3.834672 | 3 E.LFQIIVM+ chr2@1069    | 2.78E-10 | 0.007698 |
| 8Mar2011- | 11779 | 1156.9  | 16.3571  | 3 _..HTGPGVI Splice@chr   | 1.72E-11 | 0.001157 |
| 8Mar2011- | 4115  | 831.47  | 18.34982 | 2 R.RWM+15 Splice@chr     | 4.39E-11 | 0.001746 |
| 8Mar2011- | 9326  | 897.42  | -27.6753 | 3 _..QVREMH Splice@chr    | 3.42E-10 | 0.009665 |
| 8Mar2011- | 18821 | 507.28  | -21.1368 | 4 K.VFLLHFF chr5@1119     | 2.86E-10 | 0.008177 |
| 8Mar2011- | 6036  | 693.87  | -6.6949  | 2 V.ICVAVGD chr5@1063     | 1.70E-10 | 0.004783 |
| 8Mar2011- | 5443  | 443.24  | -2.94433 | 3 _..TASPEAG chr2@1419    | 2.26E-10 | 0.006168 |
| 8Mar2011- | 7694  | 496.3   | 9.488848 | 2 R.EIKLFDVK Splice@chr   | 2.96E-10 | 0.008523 |
| 8Mar2011- | 18637 | 860.69  | 14.08015 | 4 R.FQSAAIG Splice@chr    | 3.91E-15 | 0        |
| 8Mar2011- | 9083  | 558.3   | -2.40945 | 3 R.EK+14.01 chr1@1077    | 2.10E-10 | 0.005709 |
| 8Mar2011- | 1945  | 915.48  | 12.14748 | 1 K.FHEIGGQ chrX@4727     | 1.37E-10 | 0.004093 |
| 8Mar2011- | 2262  | 425.25  | -10.7421 | 3 K.K+14.016 chr5@2074    | 2.00E-10 | 0.005355 |
| 8Mar2011- | 3293  | 527.77  | -20.0449 | 2 F.LEDITQH+ Splice@chr   | 2.59E-10 | 0.00688  |
| 8Mar2011- | 13899 | 888.47  | 22.8338  | 2 K.DITLEVEA Splice@chr   | 6.97E-13 | 1.65E-04 |
| 8Mar2011- | 14720 | 848.98  | 12.59627 | 2 R.LLELAPT: chr2@6689    | 5.30E-18 | 0        |
| 8Mar2011- | 16587 | 895.79  | 10.03186 | 3 _..RELTEEDI Splice@chr  | 4.43E-11 | 0.001746 |
| 8Mar2011- | 16766 | 1172.62 | -6.98068 | 2 K.YLGAYLL+ Splice@chr   | 2.87E-10 | 0.008177 |
| 8Mar2011- | 13720 | 639.37  | -20.365  | 2 R.SPIK+14.1 Splice@chr  | 1.47E-10 | 0.004183 |
| 8Mar2011- | 4597  | 741.39  | -17.2291 | 2 K.QKSNWH chr5@1229      | 4.57E-11 | 0.001746 |
| 8Mar2011- | 6411  | 534.32  | 13.11853 | 2 K.TNIYTILTI chr5@1329   | 2.99E-10 | 0.008523 |
| 8Mar2011- | 4500  | 462.25  | 15.3693  | 2 K.SFPGGKS chr2@1139     | 1.76E-11 | 0.001157 |
| 8Mar2011- | 11718 | 863.97  | -25.7933 | 2 K.TRK+14.C chr4@1474    | 2.97E-11 | 0.001389 |

|           |       |         |          |                         |          |          |
|-----------|-------|---------|----------|-------------------------|----------|----------|
| 8Mar2011- | 15172 | 750     | 1.825373 | 5 K.SNIFSFKP chrX@1524  | 6.02E-11 | 0.001879 |
| 8Mar2011- | 17258 | 634.84  | 6.410455 | 2 R.VDIGDILF Splice@chr | 2.29E-13 | 0        |
| 8Mar2011- | 17249 | 805.47  | -13.7324 | 2 K.TPIFIPAP chr5@1861  | 1.27E-10 | 0.003851 |
| 8Mar2011- | 12958 | 780.03  | -24.5321 | 3 ?.AQDN YM Splice@chr  | 8.62E-11 | 0.002628 |
| 8Mar2011- | 16101 | 987.51  | 4.289691 | 3 K.KYLFLDNI chr4@1288  | 9.54E-11 | 0.003132 |
| 8Mar2011- | 2325  | 452.23  | -1.48793 | 2 R.SGEPLSA Splice@chr  | 6.68E-11 | 0.002433 |
| 8Mar2011- | 19246 | 770.77  | -11.1838 | 3 K.YLDAKCK chr4@3751   | 1.46E-10 | 0.004989 |
| 8Mar2011- | 17605 | 805.47  | -13.7324 | 2 K.TPIFIPAP chr5@1861  | 2.22E-10 | 0.007701 |
| 8Mar2011- | 9822  | 886     | 3.172487 | 2 F.ENVVEVII Splice@chr | 7.96E-12 | 1.71E-04 |
| 8Mar2011- | 5049  | 741.39  | -17.2291 | 2 K.QKSNWH chr5@1229    | 4.23E-11 | 0.001886 |
| 8Mar2011- | 4399  | 439.91  | -18.8195 | 3 R.NSYNGLF chr4@9687   | 1.73E-11 | 5.08E-04 |
| 8Mar2011- | 4408  | 675.35  | 27.69703 | 1 R.GVEGEG chr1@1159    | 2.28E-10 | 0.007701 |
| 8Mar2011- | 10683 | 942.97  | -28.8151 | 2 _.MISEFIN chrX@5935   | 5.78E-11 | 0.002178 |
| 8Mar2011- | 6930  | 895.51  | -6.04083 | 2 _.SGISIEVN Splice@chr | 2.31E-10 | 0.007833 |
| 8Mar2011- | 9285  | 509.3   | -20.473  | 2 R.SSVIMLIV chr2@5767  | 3.76E-11 | 0.001755 |
| 8Mar2011- | 9795  | 972.48  | 0.105485 | 3 _.CFNFIFSI chr2@5502  | 9.71E-11 | 0.003305 |
| 8Mar2011- | 2425  | 452.23  | -1.48793 | 2 R.SGEPLSA Splice@chr  | 3.21E-11 | 0.001755 |
| 8Mar2011- | 17596 | 634.84  | 6.410455 | 2 R.VDIGDILF Splice@chr | 1.66E-12 | 0        |
| 8Mar2011- | 5157  | 741.39  | -17.2291 | 2 K.QKSNWH chr5@1229    | 3.29E-11 | 0.001755 |
| 8Mar2011- | 19191 | 1097.23 | 11.82664 | 3 K.DKPFFPSI Splice@chr | 6.93E-11 | 0.002433 |
| 8Mar2011- | 13344 | 780.03  | -24.5321 | 3 ?.AQDN YM Splice@chr  | 6.28E-11 | 0.002318 |
| 8Mar2011- | 16195 | 746.91  | 13.99266 | 2 V.EK+14.01 chrX@6709  | 1.74E-11 | 5.08E-04 |
| 8Mar2011- | 3901  | 527.77  | -20.0449 | 2 F.LEDITQH Splice@chr  | 1.41E-10 | 0.004698 |
| 8Mar2011- | 17729 | 912.48  | 12.42986 | 2 R.TMLELIN Splice@chr  | 4.93E-17 | 0        |
| 8Mar2011- | 8840  | 571.86  | -2.35222 | 2 T.KKGDIVEI chr5@1238  | 2.75E-10 | 0.009609 |
| 8Mar2011- | 17282 | 957.5   | 22.57714 | 3 K.LFQVLQN Splice@chr  | 1.73E-10 | 0.005512 |
| 8Mar2011- | 18447 | 673.71  | -19.9391 | 3 _.CGTVFSK chrX@1163   | 9.05E-11 | 0.002869 |
| 8Mar2011- | 19170 | 1096.88 | -2.30208 | 3 K.DKPFFPSI Splice@chr | 2.73E-10 | 0.009609 |
| 8Mar2011- | 11059 | 671.37  | -24.0361 | 2 T.FNIVHTQ Splice@chr  | 2.68E-10 | 0.008913 |
| 8Mar2011- | 5416  | 741.39  | -17.2291 | 2 K.QKSNWH chr5@1229    | 1.96E-11 | 8.40E-04 |
| 8Mar2011- | 17557 | 634.84  | 6.410455 | 2 R.VDIGDILF Splice@chr | 6.94E-13 | 0        |
| 8Mar2011- | 18816 | 1096.89 | 6.757706 | 3 K.DKPFFPSI Splice@chr | 4.66E-11 | 0.001886 |
| 8Mar2011- | 16543 | 895.78  | -1.06827 | 3 _.RELTEEDI Splice@chr | 5.30E-12 | 0        |
| 8Mar2011- | 4642  | 831.47  | 18.34982 | 2 R.RWM+15 Splice@chr   | 7.84E-11 | 0.002433 |
| 8Mar2011- | 16898 | 895.78  | -1.06827 | 3 _.RELTEEDI Splice@chr | 7.06E-12 | 1.71E-04 |
| 8Mar2011- | 2377  | 452.23  | -1.48793 | 2 R.SGEPLSA Splice@chr  | 4.88E-11 | 0.001886 |
| 8Mar2011- | 7473  | 1025.62 | -1.90621 | 1 K.LGLGSL chr5@4945    | 8.70E-12 | 1.71E-04 |
| 8Mar2011- | 17344 | 1129.09 | -16.86   | 2 S.PPK+14.0 chrX@7427  | 2.61E-10 | 0.008635 |
| 8Mar2011- | 5100  | 741.39  | -17.2291 | 2 K.QKSNWH chr5@1229    | 2.37E-11 | 0.001488 |
| 8Mar2011- | 11783 | 881.47  | 19.52679 | 2 A.HRK+14.1 chr5@1438  | 2.61E-10 | 0.008635 |
| 8Mar2011- | 1011  | 441.72  | 0.069246 | 2 K.YVGNQS chr5@9135    | 2.09E-10 | 0.006738 |
| 8Mar2011- | 6559  | 422.75  | 3.545689 | 2 R.LATVTPSI chr5@2075  | 7.09E-11 | 0.002433 |
| 8Mar2011- | 15031 | 848.97  | 0.791766 | 2 R.LLELAPTC chr2@6685  | 2.70E-17 | 0        |
| 8Mar2011- | 16359 | 987.51  | 4.289691 | 3 K.KYLFLDNI chr4@1288  | 6.66E-11 | 0.002318 |
| 8Mar2011- | 9350  | 509.3   | -20.473  | 2 R.SSVIMLIV chr2@5767  | 2.32E-10 | 0.007833 |
| 8Mar2011- | 2603  | 915.47  | 1.201399 | 1 K.FHEIGGQ chrX@4727   | 6.40E-11 | 0.002318 |
| 8Mar2011- | 15056 | 669.36  | -13.2955 | 2 K.LEFNISK chr1@1931   | 3.26E-11 | 0.001755 |

|           |       |         |          |                         |          |          |
|-----------|-------|---------|----------|-------------------------|----------|----------|
| 8Mar2011- | 9228  | 509.3   | -20.473  | 2 R.SSVIMLIV chr2@5767  | 7.37E-11 | 0.002433 |
| 8Mar2011- | 1036  | 422.27  | 2.173301 | 2 K.IGKGEVLI chrX@1204  | 2.03E-10 | 0.006464 |
| 8Mar2011- | 12919 | 855.41  | -22.1447 | 2 _HVQEVAI Splice@chr   | 4.33E-11 | 0.001886 |
| 8Mar2011- | 2473  | 452.23  | -1.48793 | 2 R.SGEPLSA Splice@chr  | 3.06E-11 | 0.001623 |
| 8Mar2011- | 4694  | 1068.57 | 23.06472 | 1 R.FMRGAA chr1@8018    | 2.01E-10 | 0.006464 |
| 8Mar2011- | 6474  | 693.87  | -6.6949  | 2 V.ICVAVGD chr5@1065   | 1.28E-10 | 0.004132 |
| 8Mar2011- | 14012 | 982     | 10.88823 | 2 R.TVMVQN Splice@chr   | 1.79E-17 | 0        |
| 8Mar2011- | 6432  | 759.41  | 13.03771 | 1 K.TAAGGT chrX@1696    | 1.43E-10 | 0.004698 |
| 8Mar2011- | 14927 | 722.45  | -4.95112 | 2 R.RK+14.01 Splice@chr | 2.19E-10 | 0.007701 |
| 8Mar2011- | 17559 | 805.47  | -13.7324 | 2 K.TPIFIPAP chr5@1861  | 2.71E-10 | 0.009333 |
| 8Mar2011- | 14419 | 899.97  | 3.975293 | 2 R.SKNKK+1 chrX@1700   | 5.48E-10 | 0.00978  |
| 8Mar2011- | 10708 | 881.92  | -2.80647 | 2 F.LQEQGT Splice@chr   | 1.18E-11 | 0        |
| 8Mar2011- | 11078 | 870.48  | 7.030425 | 1 K.ATTQRHF chr2@6975   | 2.07E-10 | 0.004626 |
| 8Mar2011- | 1831  | 915.48  | 12.14748 | 1 K.FHEIGGQ chrX@4727   | 1.37E-10 | 0.003129 |
| 8Mar2011- | 12672 | 1153.23 | -17.5731 | 3 F.EGIRTTG Splice@chr  | 8.20E-14 | 0        |
| 8Mar2011- | 8318  | 616.33  | -16.7632 | 2 K.LSKSVIFQ chr3@2798  | 4.64E-10 | 0.008252 |
| 8Mar2011- | 9049  | 788.46  | 25.48017 | 2 R.TTALKDIL chr1@4305  | 2.09E-10 | 0.004626 |
| 8Mar2011- | 5259  | 566.81  | 0.647242 | 2 I.RIPLDYAE chr5@2047  | 7.11E-11 | 0.001432 |
| 8Mar2011- | 15906 | 895.79  | 10.03186 | 3 _RELTEEDI Splice@chr  | 2.30E-10 | 0.004951 |
| 8Mar2011- | 13933 | 722.45  | -4.95112 | 2 R.RK+14.01 Splice@chr | 2.90E-10 | 0.005508 |
| 8Mar2011- | 2985  | 454.23  | -12.7934 | 2 K.QFTGTPT chrX@5751   | 5.41E-10 | 0.009686 |
| 8Mar2011- | 14411 | 937     | -18.3647 | 2 R.NPFLEEV chr3@1097   | 3.20E-11 | 2.73E-04 |
| 8Mar2011- | 4481  | 741.39  | -17.2291 | 2 K.QKSNWH chr5@1229    | 2.43E-11 | 1.40E-04 |
| 8Mar2011- | 16514 | 805.47  | -13.7324 | 2 K.TPIFIPAP chr5@1861  | 3.57E-11 | 2.73E-04 |
| 8Mar2011- | 16515 | 634.84  | 6.410455 | 2 R.VDIGDILF Splice@chr | 4.71E-13 | 0        |
| 8Mar2011- | 4710  | 741.39  | -17.2291 | 2 K.QKSNWH chr5@1229    | 2.56E-11 | 1.40E-04 |
| 8Mar2011- | 5105  | 748.4   | -14.2094 | 2 K.QKSNWH chr5@1229    | 2.78E-11 | 2.73E-04 |
| 8Mar2011- | 5027  | 626.8   | -12.4435 | 2 R.LCESGAA Splice@chr  | 2.71E-16 | 0        |
| 8Mar2011- | 13496 | 576.31  | 26.08044 | 3 K.TSASGEE Splice@chr  | 5.71E-11 | 6.61E-04 |
| 8Mar2011- | 9801  | 472.29  | -0.64754 | 2 _SPLFVPKI chrX@4402   | 1.61E-10 | 0.003835 |
| 8Mar2011- | 11891 | 895.47  | 23.86388 | 2 K.TEM+15.1 chr2@1475  | 4.65E-10 | 0.008252 |
| 8Mar2011- | 16560 | 634.84  | 6.410455 | 2 R.VDIGDILF Splice@chr | 2.45E-13 | 0        |
| 8Mar2011- | 9596  | 657.04  | -26.9179 | 3 R.GNVRK+1 chrX@7490   | 3.17E-10 | 0.00571  |
| 8Mar2011- | 7505  | 424.26  | 4.766979 | 2 R.STVTGLLI Splice@chr | 2.02E-10 | 0.004398 |
| 8Mar2011- | 11707 | 618.32  | 1.155298 | 3 K.LTNLSTA Splice@chr  | 2.32E-10 | 0.004951 |
| 8Mar2011- | 7333  | 724.35  | 19.12636 | 3 V.CLTEEGK Splice@chr  | 7.42E-13 | 0        |
| 8Mar2011- | 2007  | 490.29  | 7.297594 | 2 K.MNIYVLV chrX@1595   | 3.33E-10 | 0.006178 |
| 8Mar2011- | 12655 | 490.75  | 12.83676 | 2 K.DITMEIM chr3@1481   | 5.22E-11 | 6.61E-04 |
| 8Mar2011- | 4420  | 741.39  | -17.2291 | 2 K.QKSNWH chr5@1229    | 2.86E-11 | 2.73E-04 |
| 8Mar2011- | 4419  | 494.6   | -1.40142 | 3 K.FPENRHI chr2@1477   | 2.06E-10 | 0.004626 |
| 8Mar2011- | 4366  | 741.39  | -17.2291 | 2 K.QKSNWH chr5@1229    | 3.67E-11 | 4.09E-04 |
| 8Mar2011- | 18445 | 1174.62 | 7.800997 | 2 K.INWAVTI chr4@2890   | 1.32E-19 | 0        |
| 8Mar2011- | 15317 | 665.37  | -26.6417 | 2 Q.INNK+14 Splice@chr  | 4.02E-10 | 0.00693  |
| 8Mar2011- | 9284  | 1075.06 | -6.79295 | 2 R.TCSK+14. chr2@1255  | 3.15E-10 | 0.00571  |
| 8Mar2011- | 7089  | 724.35  | 19.12636 | 3 V.CLTEEGK Splice@chr  | 1.29E-10 | 0.003015 |
| 8Mar2011- | 9233  | 1075.06 | -6.79295 | 2 R.TCSK+14. chr2@1255  | 4.64E-10 | 0.008146 |
| 8Mar2011- | 11990 | 858.48  | 6.006088 | 3 _LETGIKPI Splice@chr  | 1.47E-13 | 0        |

|           |       |         |          |                           |          |          |
|-----------|-------|---------|----------|---------------------------|----------|----------|
| 8Mar2011- | 12043 | 858.48  | 6.006088 | 3 _..LETGIHKP! Splice@chr | 1.18E-11 | 0        |
| 8Mar2011- | 15958 | 879.04  | -23.542  | 2 K.KVAWK+ chr2@1475      | 5.49E-10 | 0.00978  |
| 8Mar2011- | 17940 | 860.69  | 14.08015 | 4 R.FQSAAIG Splice@chr    | 1.08E-14 | 0        |
| 8Mar2011- | 6643  | 1025.62 | -1.90621 | 1 K.LGLGSGL chr5@4945     | 1.01E-11 | 0        |
| 8Mar2011- | 6121  | 533.82  | 16.26677 | 2 K.TNIYTILTI chr5@1325   | 8.85E-11 | 0.001669 |
| 8Mar2011- | 15394 | 965.49  | -9.59113 | 2 _..RFAEFAG chr2@1518    | 2.34E-11 | 1.40E-04 |
| 8Mar2011- | 13516 | 829.44  | 22.15469 | 2 R.FADLPFA chr2@1282     | 4.93E-10 | 0.00869  |
| 8Mar2011- | 15169 | 746.91  | 13.99266 | 2 V.EK+14.01 Splice@chr   | 1.70E-11 | 1.40E-04 |
| 8Mar2011- | 18450 | 783.75  | 7.307848 | 3 K.INWAVTI chr4@2890     | 5.97E-11 | 0.001182 |
| 8Mar2011- | 17920 | 688.75  | 8.895763 | 5 R.FQSAAIG Splice@chr    | 1.15E-11 | 0        |
| 8Mar2011- | 3102  | 527.77  | -20.0449 | 2 F.LEDITQH/ Splice@chr   | 3.43E-10 | 0.006404 |
| 8Mar2011- | 10165 | 671.37  | -24.0361 | 2 T.FNIVHTQ Splice@chr    | 4.41E-10 | 0.008048 |
| 8Mar2011- | 18025 | 1043.93 | -23.9424 | 3 K.TK+14.01 chr1@3658    | 2.12E-10 | 0.004626 |
| 8Mar2011- | 12547 | 622.34  | 25.711   | 2 R.AK+14.01 chr2@4270    | 1.05E-10 | 0.002415 |
| 8Mar2011- | 1314  | 446.77  | 19.99118 | 2 R.PVFSITTK chrX@1588    | 1.81E-10 | 0.004062 |
| 8Mar2011- | 5748  | 546.28  | 0.335806 | 2 K.EKNSNIC' chr4@4955    | 8.95E-12 | 0        |
| 8Mar2011- | 15434 | 965.48  | -19.9748 | 2 _..RFAEFAG chr2@1518    | 1.55E-10 | 0.003477 |
| 8Mar2011- | 16559 | 805.47  | -13.7324 | 2 K.TPIFIPAP! chr5@1861   | 4.33E-11 | 5.33E-04 |
| 8Mar2011- | 13010 | 982     | 10.88823 | 2 R.TVMVQN Splice@chr     | 1.31E-21 | 0        |
| 8Mar2011- | 3179  | 439.91  | 17.33685 | 3 K.NSQKNPI chr2@3540     | 3.34E-10 | 0.006289 |
| 8Mar2011- | 17908 | 1147.25 | 13.44098 | 3 R.FQSAAIG Splice@chr    | 4.61E-13 | 0        |
| 8Mar2011- | 11860 | 833.94  | 2.824179 | 2 _..IIEPYVAM Splice@chr  | 4.56E-11 | 5.33E-04 |
| 8Mar2011- | 2216  | 658.8   | -10.3921 | 2 H.QNMDP! chr4@1261      | 4.70E-10 | 0.008252 |
| 8Mar2011- | 9796  | 1106.62 | -21.4918 | 1 K.MTKNSAI chr2@1345     | 5.53E-10 | 0.00978  |
| 8Mar2011- | 9812  | 827.77  | -14.6467 | 3 K.NNRKHTI chr5@2125     | 4.42E-10 | 0.008048 |
| 8Mar2011- | 4918  | 626.3   | -9.76097 | 2 R.LCESGAA Splice@chr    | 2.61E-16 | 0        |
| 8Mar2011- | 1896  | 819.43  | 10.73915 | 1 R.EATETIR. chrX@2916    | 3.92E-10 | 0.00693  |
| 8Mar2011- | 7533  | 695.43  | 13.79946 | 1 R.GAGIHIK. chrX@7403    | 4.79E-10 | 0.008472 |
| 8Mar2011- | 17391 | 996.87  | -23.3576 | 3 S.VPFSK+14 Splice@chr   | 1.48E-10 | 0.003231 |
| 8Mar2011- | 12617 | 1153.23 | -17.5731 | 3 F.EGIRTGG' Splice@chr   | 2.14E-13 | 0        |
| 8Mar2011- | 10113 | 671.37  | -24.0361 | 2 T.FNIVHTQ Splice@chr    | 4.03E-10 | 0.00693  |
| 8Mar2011- | 12553 | 855.41  | -22.1447 | 2 _..HVQEVAI Splice@chr   | 4.68E-11 | 5.93E-04 |
| 8Mar2011- | 14633 | 669.35  | -28.2834 | 2 K.LEFNISKI chr1@1931    | 4.45E-11 | 5.93E-04 |
| 8Mar2011- | 12770 | 664.37  | 7.851479 | 3 _..PTLNK+1. chr1@6526   | 3.17E-10 | 0.00444  |
| 8Mar2011- | 17503 | 795.66  | -2.97654 | 4 K.SGTIFDNI Splice@chr   | 2.99E-14 | 0        |
| 8Mar2011- | 14778 | 895.92  | -18.2779 | 2 K.QCNVYFS chr1@1476     | 2.24E-10 | 0.002939 |
| 8Mar2011- | 18139 | 860.69  | 14.08015 | 4 R.FQSAAIG Splice@chr    | 3.58E-12 | 1.56E-04 |
| 8Mar2011- | 2049  | 544.8   | 7.520127 | 2 K.KDLEVEV Splice@chr    | 6.58E-10 | 0.007973 |
| 8Mar2011- | 12596 | 858.48  | 6.006088 | 3 _..LETGIHKP! Splice@chr | 1.60E-10 | 0.001773 |
| 8Mar2011- | 8987  | 616.33  | -16.7632 | 2 K.LSKSVIFQ chr3@2798    | 4.38E-10 | 0.00576  |
| 8Mar2011- | 10859 | 671.37  | -24.0361 | 2 T.FNIVHTQ Splice@chr    | 2.94E-10 | 0.00444  |
| 8Mar2011- | 17483 | 1060.54 | -6.74128 | 3 K.SGTIFDNI Splice@chr   | 1.24E-13 | 0        |
| 8Mar2011- | 4800  | 713.06  | -21.1431 | 3 K.TKIK+14.1 Splice@chr  | 1.00E-10 | 0.001262 |
| 8Mar2011- | 10075 | 986.5   | -26.5069 | 2 K.KSKKSCA. chr1@9876    | 7.84E-11 | 9.97E-04 |
| 8Mar2011- | 3698  | 439.72  | 11.61694 | 2 R.ESNDASK chr1@8022     | 3.56E-10 | 0.004936 |
| 8Mar2011- | 2611  | 639.81  | -25.128  | 2 K.AEFDEQK Splice@chr    | 5.17E-10 | 0.007091 |
| 8Mar2011- | 17400 | 795.66  | -2.97654 | 4 K.SGTIFDNI Splice@chr   | 5.30E-14 | 0        |

|           |       |         |          |                         |          |          |
|-----------|-------|---------|----------|-------------------------|----------|----------|
| 8Mar2011- | 15609 | 940.45  | -9.06687 | 2 L.K+14.016 chr3@1105  | 1.32E-10 | 0.001515 |
| 8Mar2011- | 17420 | 1060.55 | 2.708983 | 3 K.SGTIFDNI Splice@chr | 5.12E-13 | 0        |
| 8Mar2011- | 9453  | 844.41  | -5.75536 | 2 _EGDGEIE Splice@chr   | 3.62E-15 | 0        |
| 8Mar2011- | 8933  | 616.33  | -16.7632 | 2 K.LSKSVIFQ chr3@2798  | 5.28E-10 | 0.007182 |
| 8Mar2011- | 15672 | 747.41  | 11.74382 | 2 V.EK+14.01 Splice@chr | 2.65E-11 | 3.05E-04 |
| 8Mar2011- | 14108 | 962.95  | -10.1243 | 2 K.K+14.016 chr1@4936  | 5.05E-10 | 0.006971 |
| 8Mar2011- | 14103 | 575.97  | 16.41892 | 3 K.TSASGEE Splice@chr  | 6.90E-11 | 8.65E-04 |
| 8Mar2011- | 8047  | 496.3   | 9.488848 | 2 R.EIKLFDVK Splice@chr | 5.97E-10 | 0.007397 |
| 8Mar2011- | 5652  | 626.3   | -9.76097 | 2 R.LCESGAA Splice@chr  | 1.12E-15 | 0        |
| 8Mar2011- | 13536 | 982     | 10.88823 | 2 R.TVMVQN Splice@chr   | 6.78E-20 | 0        |
| 8Mar2011- | 7976  | 724.35  | 19.12636 | 3 V.CLTEEGK Splice@chr  | 4.37E-12 | 1.56E-04 |
| 8Mar2011- | 16539 | 1173.13 | 0.131152 | 2 K.YLGAYLL Splice@chr  | 9.44E-11 | 0.001129 |
| 8Mar2011- | 7925  | 724.35  | 19.12636 | 3 V.CLTEEGK Splice@chr  | 2.81E-12 | 1.56E-04 |
| 8Mar2011- | 5549  | 626.3   | -9.76097 | 2 R.LCESGAA Splice@chr  | 6.45E-16 | 0        |
| 8Mar2011- | 15819 | 665.37  | -26.6417 | 2 Q.INNK+14 Splice@chr  | 4.06E-10 | 0.005272 |
| 8Mar2011- | 10315 | 657.04  | -26.9179 | 3 R.GNVRK+1 Splice@chr  | 1.62E-10 | 0.001773 |
| 8Mar2011- | 17085 | 975.81  | -5.15613 | 3 K.SGTIFDNI Splice@chr | 3.08E-10 | 0.00444  |
| 8Mar2011- | 4751  | 438.26  | 15.00593 | 2 R.DPKPPPP chr1@1285   | 7.40E-10 | 0.009772 |
| 8Mar2011- | 9335  | 616.86  | 0.396427 | 2 R.QVIHAGF Splice@chr  | 6.55E-10 | 0.007851 |
| 8Mar2011- | 13236 | 1153.23 | -17.5731 | 3 F.EGIRTTGG Splice@chr | 1.28E-13 | 0        |
| 8Mar2011- | 18313 | 960.15  | -10.8603 | 3 N.GFEPRLA Splice@chr  | 2.64E-11 | 3.05E-04 |
| 8Mar2011- | 17492 | 1143.71 | -1.14794 | 2 _VVELEGL Splice@chr   | 1.14E-10 | 0.001393 |
| 8Mar2011- | 15768 | 665.37  | -26.6417 | 2 Q.INNK+14 Splice@chr  | 5.67E-10 | 0.007278 |
| 8Mar2011- | 16957 | 634.84  | 6.410455 | 2 R.VDIGDILF Splice@chr | 1.39E-12 | 1.56E-04 |
| 8Mar2011- | 16994 | 634.84  | 6.410455 | 2 R.VDIGDILF Splice@chr | 3.44E-12 | 1.56E-04 |
| 8Mar2011- | 10259 | 657.04  | -26.9179 | 3 R.GNVRK+1 Splice@chr  | 3.31E-10 | 0.004563 |
| 8Mar2011- | 6743  | 634.87  | 13.67349 | 2 R.IQKCHTLI Splice@chr | 6.86E-10 | 0.008442 |
| 8Mar2011- | 17436 | 795.66  | -2.97654 | 4 K.SGTIFDNI Splice@chr | 3.59E-13 | 0        |
| 8Mar2011- | 7630  | 724.35  | 19.12636 | 3 V.CLTEEGK Splice@chr  | 5.34E-12 | 1.56E-04 |
| 8Mar2011- | 12866 | 780.03  | -24.5321 | 3 ?.AQDNYM Splice@chr   | 1.09E-11 | 1.56E-04 |
| 8Mar2011- | 17453 | 1060.54 | -6.74128 | 3 K.SGTIFDNI Splice@chr | 5.08E-13 | 0        |
| 8Mar2011- | 17469 | 795.66  | -2.97654 | 4 K.SGTIFDNI Splice@chr | 2.50E-15 | 0        |
| 8Mar2011- | 7646  | 1086.02 | 18.22629 | 2 V.CLTEEGK Splice@chr  | 1.53E-12 | 1.56E-04 |
| 8Mar2011- | 1278  | 873.51  | -11.1925 | 1 R.QLGFPIAI chr3@2252  | 3.08E-10 | 0.00444  |
| 8Mar2011- | 11213 | 881.92  | -2.80647 | 2 F.LQEQGTY Splice@chr  | 7.34E-12 | 1.56E-04 |
| 8Mar2011- | 2334  | 643.89  | -11.5825 | 2 _QVAITQI Splice@chr   | 5.05E-10 | 0.006971 |
| 8Mar2011- | 4423  | 501.25  | -20.6805 | 2 _QNGNVQ Splice@chr    | 8.35E-11 | 0.002463 |
| 8Mar2011- | 9941  | 657.04  | -26.9179 | 3 R.GNVRK+1 chrX@7490   | 1.02E-10 | 0.002675 |
| 8Mar2011- | 19184 | 783.75  | 7.307848 | 3 K.INWAVTI chr4@2890   | 5.04E-16 | 0        |
| 8Mar2011- | 12299 | 833.94  | 2.824179 | 2 _IIEPYVAV Splice@chr  | 3.28E-10 | 0.008939 |
| 8Mar2011- | 5045  | 447.24  | 0.273558 | 4 L.SK+14.01 chr4@7034  | 1.52E-10 | 0.004143 |
| 8Mar2011- | 7467  | 724.35  | 19.12636 | 3 V.CLTEEGK Splice@chr  | 5.15E-12 | 4.48E-04 |
| 8Mar2011- | 13947 | 902.54  | -28.5309 | 1 R.PFGVVVK chr2@1360   | 1.49E-10 | 0.003924 |
| 8Mar2011- | 17232 | 634.84  | 6.410455 | 2 R.VDIGDILF Splice@chr | 1.71E-12 | 1.58E-04 |
| 8Mar2011- | 1840  | 562.31  | -13.4391 | 2 R.FYLLLYLK Splice@chr | 6.06E-11 | 0.001757 |
| 8Mar2011- | 7190  | 724.35  | 19.12636 | 3 V.CLTEEGK Splice@chr  | 5.91E-11 | 0.001757 |
| 8Mar2011- | 18397 | 795.66  | -2.97654 | 4 K.SGTIFDNI Splice@chr | 1.18E-13 | 0        |

|           |       |         |          |                         |          |          |
|-----------|-------|---------|----------|-------------------------|----------|----------|
| 8Mar2011- | 4399  | 741.39  | -17.2291 | 2 K.QKSNWH chr5@1229    | 1.47E-11 | 6.89E-04 |
| 8Mar2011- | 17291 | 805.47  | -13.7324 | 2 K.TPIFIPAP chr5@1861  | 2.35E-11 | 8.02E-04 |
| 8Mar2011- | 7953  | 444.91  | 23.28334 | 3 K.CTLINELN Splice@chr | 1.74E-10 | 0.004469 |
| 8Mar2011- | 10928 | 881.92  | -2.80647 | 2 F.LQEQGTY Splice@chr  | 1.59E-11 | 6.89E-04 |
| 8Mar2011- | 18681 | 860.69  | 14.08015 | 4 R.FQSAAIG Splice@chr  | 3.78E-12 | 4.48E-04 |
| 8Mar2011- | 4839  | 741.89  | -19.4947 | 2 K.QKSNWH chr5@1229    | 1.05E-11 | 5.64E-04 |
| 8Mar2011- | 17788 | 795.66  | -2.97654 | 4 K.SGTIFDNI Splice@chr | 3.06E-16 | 0        |
| 8Mar2011- | 18232 | 777.08  | 13.6322  | 3 Q.EPVEDGI Splice@chr  | 1.84E-11 | 8.02E-04 |
| 8Mar2011- | 10335 | 671.37  | -24.0361 | 2 T.FNIVHTQ Splice@chr  | 2.22E-10 | 0.006023 |
| 8Mar2011- | 3585  | 471.78  | -26.9663 | 2 K.IKVNFPPI chr2@3034  | 1.03E-10 | 0.002675 |
| 8Mar2011- | 14967 | 742.89  | 7.287383 | 2 K.M+15.99 chr4@1648   | 3.03E-10 | 0.008301 |
| 8Mar2011- | 12348 | 855.41  | -22.1447 | 2 _HVQEVAI Splice@chr   | 1.30E-10 | 0.003466 |
| 8Mar2011- | 18373 | 1147.25 | 13.44098 | 3 R.FQSAAIG Splice@chr  | 1.84E-11 | 8.02E-04 |
| 8Mar2011- | 12426 | 858.48  | 6.006088 | 3 _LETGIKPI Splice@chr  | 2.86E-13 | 0        |
| 8Mar2011- | 8771  | 821.95  | 26.74636 | 2 _SPTLGGN Splice@chr   | 5.53E-18 | 0        |
| 8Mar2011- | 12368 | 858.48  | 6.006088 | 3 _LETGIKPI Splice@chr  | 7.13E-14 | 0        |
| 8Mar2011- | 180   | 501.07  | 8.971133 | 4 R.KKLMMK chr5@1910    | 2.24E-10 | 0.006134 |
| 8Mar2011- | 12169 | 607     | -9.70672 | 3 I.NRFNISK chrX@1250   | 1.59E-10 | 0.004143 |
| 8Mar2011- | 4821  | 787.44  | 10.94316 | 1 K.SDAAPAK chrX@8018   | 3.09E-11 | 9.21E-04 |
| 8Mar2011- | 12288 | 855.41  | -22.1447 | 2 _HVQEVAI Splice@chr   | 3.74E-11 | 0.001165 |
| 8Mar2011- | 13056 | 622.34  | 25.711   | 2 R.AK+14.01 chr2@4270  | 1.65E-10 | 0.004469 |
| 8Mar2011- | 17826 | 795.66  | -2.97654 | 4 K.SGTIFDNI Splice@chr | 2.00E-14 | 0        |
| 8Mar2011- | 17827 | 1060.54 | -6.74128 | 3 K.SGTIFDNI Splice@chr | 4.07E-15 | 0        |
| 8Mar2011- | 18367 | 795.66  | -2.97654 | 4 K.SGTIFDNI Splice@chr | 2.45E-17 | 0        |
| 8Mar2011- | 10795 | 1156.9  | 16.3571  | 3 _HTGPGVI Splice@chr   | 1.43E-16 | 0        |
| 8Mar2011- | 14540 | 722.46  | 8.933123 | 2 R.RK+14.01 Splice@chr | 2.35E-10 | 0.00634  |
| 8Mar2011- | 12221 | 607     | -9.70672 | 3 I.NRFNISK chrX@1250   | 5.60E-11 | 0.001644 |
| 8Mar2011- | 16142 | 895.78  | -1.06827 | 3 _RELTEEDI Splice@chr  | 3.98E-12 | 4.48E-04 |
| 8Mar2011- | 4460  | 741.39  | -17.2291 | 2 K.QKSNWH chr5@1229    | 9.72E-11 | 0.002566 |
| 8Mar2011- | 18961 | 960.49  | -5.15365 | 3 N.GFEPRLA Splice@chr  | 4.38E-13 | 0        |
| 8Mar2011- | 8356  | 1137.65 | -15.1425 | 1 Q.FLVISFA chrX@1232   | 3.56E-10 | 0.009455 |
| 8Mar2011- | 6762  | 552.33  | -22.5469 | 2 _NITVRKFI chr1@2224   | 2.70E-10 | 0.006867 |
| 8Mar2011- | 15001 | 1167.56 | -16.7225 | 2 L.K+14.016 Splice@chr | 4.88E-11 | 0.001402 |
| 8Mar2011- | 16006 | 987.51  | 4.289691 | 3 K.KYLFLDNI chr4@1288  | 5.23E-11 | 0.001644 |
| 8Mar2011- | 16508 | 895.78  | -1.06827 | 3 _RELTEEDI Splice@chr  | 4.28E-12 | 4.48E-04 |
| 8Mar2011- | 18725 | 860.69  | 14.08015 | 4 R.FQSAAIG Splice@chr  | 5.57E-13 | 0        |
| 8Mar2011- | 9309  | 788.46  | 25.48017 | 2 R.TTALKDIL chr1@4303  | 1.43E-10 | 0.003691 |
| 8Mar2011- | 12774 | 516.31  | 23.5317  | 3 R.NIIFLMVI chrX@1294  | 6.91E-11 | 0.001873 |
| 8Mar2011- | 5003  | 626.3   | -9.76097 | 2 R.LCESGAA Splice@chr  | 4.32E-16 | 0        |
| 8Mar2011- | 17658 | 1060.54 | -6.74128 | 3 K.SGTIFDNI Splice@chr | 1.96E-13 | 0        |
| 8Mar2011- | 17281 | 634.84  | 6.410455 | 2 R.VDIGDILF Splice@chr | 5.73E-13 | 0        |
| 8Mar2011- | 1971  | 490.29  | 7.297594 | 2 K.MNIYVLV chrX@1595   | 1.61E-10 | 0.004143 |
| 8Mar2011- | 923   | 873.51  | -11.1925 | 1 R.QLGFPIAI chr3@2252  | 3.18E-10 | 0.008735 |
| 8Mar2011- | 17387 | 848.81  | 3.071677 | 3 K.VAK+14.1 chr3@1057  | 3.57E-10 | 0.009455 |
| 8Mar2011- | 9396  | 1162.23 | 14.80982 | 3 _HTGPGVI Splice@chr   | 9.65E-13 | 1.58E-04 |
| 8Mar2011- | 9389  | 871.93  | 21.18917 | 4 _HTGPGVI Splice@chr   | 3.33E-10 | 0.008939 |
| 8Mar2011- | 5447  | 435.25  | -4.00582 | 2 K.KISAHGTI chr4@1727  | 9.03E-11 | 0.002566 |

|           |       |         |          |                         |          |          |
|-----------|-------|---------|----------|-------------------------|----------|----------|
| 8Mar2011- | 1386  | 431.72  | 22.24858 | 2 R.GASDNSF chr2@1466   | 1.19E-10 | 0.003376 |
| 8Mar2011- | 17950 | 1065.22 | 0.86123  | 3 K.SGTIFDNI Splice@chr | 9.80E-13 | 1.58E-04 |
| 8Mar2011- | 12522 | 664.7   | 1.197202 | 3 _PTLNK+1. chr1@6526   | 3.75E-10 | 0.009774 |
| 8Mar2011- | 13395 | 759.4   | -15.0495 | 2 K.FIDANLQ chr4@8206   | 3.24E-10 | 0.008841 |
| 8Mar2011- | 4750  | 741.39  | -17.2291 | 2 K.QKSNWH chr5@1229    | 1.13E-11 | 5.64E-04 |
| 8Mar2011- | 8281  | 862.48  | -24.8232 | 1 R.KMRIADk chr4@1399   | 3.57E-10 | 0.009455 |
| 8Mar2011- | 10093 | 827.77  | -14.6467 | 3 K.NNRKHTI chr5@2129   | 2.28E-10 | 0.006243 |
| 8Mar2011- | 9132  | 897.42  | -27.6753 | 3 _QVREMH Splice@chr    | 2.54E-10 | 0.006545 |
| 8Mar2011- | 16052 | 987.51  | 4.289691 | 3 K.KYLFLDNI chr4@1288  | 1.77E-10 | 0.004576 |
| 8Mar2011- | 2021  | 490.29  | 7.297594 | 2 K.MNIYVLV chrX@1599   | 9.94E-11 | 0.002675 |
| 8Mar2011- | 4350  | 741.39  | -17.2291 | 2 K.QKSNWH chr5@1229    | 3.46E-11 | 0.001165 |
| 8Mar2011- | 5172  | 748.4   | -14.2094 | 2 K.QKSNWH chr5@1229    | 9.59E-11 | 0.002566 |
| 8Mar2011- | 5797  | 693.87  | -6.6949  | 2 V.ICVAVGD chr5@1063   | 3.09E-10 | 0.008517 |
| 8Mar2011- | 9504  | 1075.06 | -6.79295 | 2 R.TCSK+14. chr2@1253  | 9.56E-11 | 0.002566 |
| 8Mar2011- | 18337 | 795.66  | -2.97654 | 4 K.SGTIFDNI Splice@chr | 1.16E-13 | 0        |
| 8Mar2011- | 945   | 873.51  | -11.1925 | 1 R.QLGFPIAI chr3@2252  | 3.74E-10 | 0.009663 |
| 8Mar2011- | 6255  | 533.82  | 16.26677 | 2 K.TNIYTILTI chr5@1329 | 2.37E-10 | 0.00634  |
| 8Mar2011- | 13782 | 792.43  | 17.918   | 4 R.TTGVVLD chr2@1512   | 1.62E-10 | 0.004256 |
| 8Mar2011- | 12578 | 664.7   | 1.197202 | 3 _PTLNK+1. chr1@6526   | 5.61E-11 | 0.001644 |
| 8Mar2011- | 1188  | 816.46  | -20.7065 | 2 K.EKMGKN chr3@1328    | 1.23E-10 | 0.003376 |
| 8Mar2011- | 7706  | 725.88  | 19.33943 | 2 R.MEHLCRI Splice@chr  | 7.07E-11 | 0.001996 |
| 8Mar2011- | 16549 | 895.78  | -1.06827 | 3 _RELTEEDI Splice@chr  | 1.62E-11 | 6.89E-04 |
| 8Mar2011- | 13107 | 622.34  | 25.711   | 2 R.AK+14.01 chr2@4270  | 1.17E-10 | 0.003376 |
| 8Mar2011- | 17687 | 1060.54 | -6.74128 | 3 K.SGTIFDNI Splice@chr | 1.45E-12 | 1.58E-04 |
| 8Mar2011- | 6247  | 626.3   | -9.76097 | 2 R.LCESGAA Splice@chr  | 4.27E-16 | 0        |
| 8Mar2011- | 13489 | 607     | -9.70672 | 3 I.NRFNISK chrX@1250   | 1.47E-10 | 0.002834 |
| 8Mar2011- | 14378 | 622.33  | 9.587405 | 2 R.AK+14.01 chr2@4270  | 1.44E-10 | 0.002834 |
| 8Mar2011- | 20330 | 860.69  | 14.08015 | 4 R.FQSAAIG Splice@chr  | 8.22E-16 | 0        |
| 8Mar2011- | 19242 | 792.15  | -18.5783 | 4 K.SGTIFDNI Splice@chr | 7.07E-18 | 0        |
| 8Mar2011- | 14479 | 490.74  | -7.60235 | 2 K.DITMEIM chr3@1481   | 1.70E-10 | 0.003126 |
| 8Mar2011- | 17685 | 886.99  | -27.5552 | 2 _NFRQIGIL chr5@3054   | 1.52E-10 | 0.003037 |
| 8Mar2011- | 14998 | 983.97  | 4.629411 | 2 R.SFSTIPDS chr2@1309  | 1.91E-15 | 0        |
| 8Mar2011- | 17325 | 665.37  | -26.6417 | 2 Q.INNK+14 Splice@chr  | 3.65E-10 | 0.007778 |
| 8Mar2011- | 9060  | 975.56  | -2.75567 | 1 K.LPKLDAYI chr4@1149  | 1.19E-10 | 0.001989 |
| 8Mar2011- | 12974 | 772.39  | -25.873  | 2 R.QFVEVH/ chr3@6909   | 5.05E-10 | 0.009545 |
| 8Mar2011- | 6885  | 743.45  | 19.34844 | 1 R.GGRISPR chr4@1236   | 4.65E-10 | 0.009086 |
| 8Mar2011- | 18729 | 634.84  | 6.410455 | 2 R.VDIGDILF Splice@chr | 1.22E-12 | 0        |
| 8Mar2011- | 6017  | 741.39  | -17.2291 | 2 K.QKSNWH chr5@1229    | 2.14E-11 | 6.20E-04 |
| 8Mar2011- | 1746  | 873.51  | -11.1925 | 1 R.QLGFPIAI chr3@2252  | 4.39E-10 | 0.008615 |
| 8Mar2011- | 5745  | 741.39  | -17.2291 | 2 K.QKSNWH chr5@1229    | 2.62E-11 | 7.12E-04 |
| 8Mar2011- | 13807 | 858.48  | 6.006088 | 3 _LETGIKPI Splice@chr  | 2.12E-14 | 0        |
| 8Mar2011- | 8467  | 724.35  | 19.12636 | 3 V.CLTEEGK Splice@chr  | 1.64E-10 | 0.003126 |
| 8Mar2011- | 19170 | 795.66  | -2.97654 | 4 K.SGTIFDNI Splice@chr | 2.27E-15 | 0        |
| 8Mar2011- | 7641  | 534.32  | 13.11853 | 2 K.TNIYTILTI chr5@1329 | 4.19E-10 | 0.008145 |
| 8Mar2011- | 19364 | 795.66  | -2.97654 | 4 K.SGTIFDNI Splice@chr | 2.02E-15 | 0        |
| 8Mar2011- | 19365 | 1060.54 | -6.74128 | 3 K.SGTIFDNI Splice@chr | 7.88E-15 | 0        |
| 8Mar2011- | 7938  | 1025.62 | -1.90621 | 1 K.LGLGSGL chr5@4949   | 1.03E-11 | 2.57E-04 |

|           |       |         |          |                         |          |          |
|-----------|-------|---------|----------|-------------------------|----------|----------|
| 8Mar2011- | 15555 | 675.33  | -24.7716 | 2 K.IEMEFLVI chrX@124   | 9.36E-11 | 0.001459 |
| 8Mar2011- | 5426  | 843.91  | 2.027504 | 2 R.ADALYNF Splice@chr  | 2.91E-14 | 0        |
| 8Mar2011- | 11309 | 657.04  | -26.9179 | 3 R.GNVRK+1 chrX@749    | 2.24E-10 | 0.00434  |
| 8Mar2011- | 19045 | 983.54  | -19.1215 | 4 R.KSLKTCK- chr4@1331  | 5.16E-10 | 0.009836 |
| 8Mar2011- | 15834 | 835.45  | -7.2977  | 4 R.K+14.016 chrX@999   | 2.71E-10 | 0.005866 |
| 8Mar2011- | 16612 | 854.82  | 15.56718 | 3 A.EITEMLPi chr2@658   | 1.86E-10 | 0.003434 |
| 8Mar2011- | 17447 | 987.51  | 4.289691 | 3 K.KYLFLDNI chr4@128   | 1.58E-11 | 5.00E-04 |
| 8Mar2011- | 2645  | 506.78  | 5.370163 | 2 _VDKNVYF chr4@119     | 1.87E-10 | 0.003434 |
| 8Mar2011- | 12289 | 1156.56 | 11.5499  | 3 _HTGPGVI Splice@chr   | 1.76E-13 | 0        |
| 8Mar2011- | 10811 | 1075.06 | -6.79295 | 2 R.TCSK+14. chr2@125   | 7.35E-11 | 0.001354 |
| 8Mar2011- | 13915 | 664.7   | 1.197202 | 3 _PTLNK+1. chr1@652    | 4.31E-10 | 0.008419 |
| 8Mar2011- | 1298  | 743.44  | -2.05524 | 1 R.GIAGALN Splice@chr  | 1.48E-10 | 0.002834 |
| 8Mar2011- | 1190  | 748.36  | 16.41564 | 1 R.ATAGDGI chr3@584    | 1.31E-10 | 0.002306 |
| 8Mar2011- | 3774  | 510.3   | 12.8833  | 2 R.RHVAYVF chr1@147    | 1.23E-10 | 0.002199 |
| 8Mar2011- | 16770 | 742.4   | -19.8931 | 2 R.KRM+15. chr4@522    | 5.44E-11 | 9.34E-04 |
| 8Mar2011- | 14429 | 622.34  | 25.711   | 2 R.AK+14.01 chr2@427   | 5.78E-11 | 0.001161 |
| 8Mar2011- | 3169  | 490.29  | 7.297594 | 2 K.MNIYVLV chrX@159    | 1.01E-10 | 0.001675 |
| 8Mar2011- | 10409 | 663.85  | -5.06443 | 2 N.KMIFSMI chr4@862    | 1.86E-10 | 0.003434 |
| 8Mar2011- | 13869 | 858.48  | 6.006088 | 3 _LETGIKPI Splice@chr  | 1.69E-12 | 0        |
| 8Mar2011- | 10067 | 821.45  | 28.79092 | 2 _SPTLGGN Splice@chr   | 1.19E-17 | 0        |
| 8Mar2011- | 19978 | 795.66  | -2.97654 | 4 K.SGTIFDNI Splice@chr | 1.75E-14 | 0        |
| 8Mar2011- | 11414 | 827.77  | -14.6467 | 3 K.NNRKHTI chr5@212    | 5.66E-11 | 0.001161 |
| 8Mar2011- | 13668 | 855.91  | -24.1079 | 2 _HVQEVAI Splice@chr   | 1.63E-13 | 0        |
| 8Mar2011- | 16462 | 937     | -18.3647 | 2 R.NPFLEEV. chr3@109   | 2.53E-11 | 7.12E-04 |
| 8Mar2011- | 16468 | 1167.56 | -16.7225 | 2 L.K+14.016 Splice@chr | 5.06E-10 | 0.009545 |
| 8Mar2011- | 20589 | 960.49  | -5.15365 | 3 N.GFEPRLA Splice@chr  | 1.40E-10 | 0.002623 |
| 8Mar2011- | 9037  | 485.3   | -18.0219 | 2 _K+14.016 chr5@193    | 3.88E-10 | 0.007864 |
| 8Mar2011- | 7461  | 533.82  | 16.26677 | 2 K.TNIYTILTI chr5@132  | 2.39E-10 | 0.004844 |
| 8Mar2011- | 8790  | 724.35  | 19.12636 | 3 V.CLTEEGK Splice@chr  | 6.30E-11 | 0.001354 |
| 8Mar2011- | 1202  | 548.32  | -5.91042 | 2 K.EREKHLR chr1@849    | 4.60E-10 | 0.009086 |
| 8Mar2011- | 12696 | 924.41  | -11.8314 | 2 Q.KPDDISN Splice@chr  | 3.17E-10 | 0.006315 |
| 8Mar2011- | 1413  | 422.27  | 2.173301 | 2 K.IGKGEVLI chrX@120   | 4.76E-10 | 0.009174 |
| 8Mar2011- | 17376 | 665.37  | -26.6417 | 2 Q.INNK+14 Splice@chr  | 1.71E-10 | 0.003126 |
| 8Mar2011- | 10590 | 788.45  | 12.76016 | 2 R.TTALKDIL chr1@430   | 2.78E-10 | 0.005943 |
| 8Mar2011- | 17830 | 1003.19 | 17.13413 | 3 R.CWNRRA Splice@chr   | 8.87E-11 | 0.001354 |
| 8Mar2011- | 20189 | 794.39  | -15.5567 | 1 _TMSKNGI chr4@892     | 1.62E-10 | 0.003126 |
| 8Mar2011- | 13754 | 858.48  | 6.006088 | 3 _LETGIKPI Splice@chr  | 2.73E-11 | 7.12E-04 |
| 8Mar2011- | 6300  | 626.3   | -9.76097 | 2 R.LCESGAA Splice@chr  | 4.82E-16 | 0        |
| 8Mar2011- | 3236  | 557.84  | 24.08391 | 2 R.EVIKHFN' chrX@923   | 3.39E-10 | 0.007006 |
| 8Mar2011- | 18035 | 1007.86 | 15.19559 | 3 R.CWNRRA Splice@chr   | 1.27E-10 | 0.002199 |
| 8Mar2011- | 3063  | 1198.15 | 6.147088 | 2 _KIIEFYSKI' chr5@178  | 1.97E-11 | 5.00E-04 |
| 8Mar2011- | 5629  | 741.39  | -17.2291 | 2 K.QKSNWH chr5@122     | 2.58E-11 | 7.12E-04 |
| 8Mar2011- | 20748 | 760.41  | 9.033528 | 3 _TQTNTKI' chrX@797    | 4.61E-10 | 0.009086 |
| 8Mar2011- | 13543 | 607     | -9.70672 | 3 I.NRFNISK chrX@125    | 1.82E-10 | 0.003434 |
| 8Mar2011- | 18774 | 634.84  | 6.410455 | 2 R.VDIGDILF Splice@chr | 1.81E-12 | 0        |
| 8Mar2011- | 14848 | 1056.56 | 28.0642  | 3 I.SRVEDDS' Splice@chr | 2.42E-13 | 0        |
| 8Mar2011- | 2948  | 915.47  | 1.201399 | 1 K.FHEIGGQ chrX@472    | 1.35E-10 | 0.002522 |

|           |       |         |          |                          |          |          |
|-----------|-------|---------|----------|--------------------------|----------|----------|
| 8Mar2011- | 7247  | 734.43  | 10.70263 | 2 L.TEQSVFK' chr5@2036   | 1.15E-10 | 0.001885 |
| 8Mar2011- | 8936  | 695.42  | -0.61526 | 1 R.GAGIHIK. chrX@7403   | 4.79E-10 | 0.009174 |
| 8Mar2011- | 5684  | 741.39  | -17.2291 | 2 K.QKSNWH chr5@1229     | 6.18E-11 | 0.001354 |
| 8Mar2011- | 21246 | 536.62  | 14.78682 | 3 K.FLYIPAFY chr5@8768   | 9.34E-11 | 0.001459 |
| 8Mar2011- | 6381  | 748.39  | -27.6021 | 2 K.QKSNWH chr5@1229     | 1.08E-10 | 0.001775 |
| 8Mar2011- | 15428 | 829.44  | 22.15469 | 2 R.FADLPFA chr2@1282    | 1.29E-10 | 0.002199 |
| 8Mar2011- | 15347 | 895.79  | 10.03186 | 3 _ .RELTEEDI Splice@chr | 2.79E-10 | 0.006429 |
| 8Mar2011- | 14462 | 879.14  | -23.3383 | 3 K.RSMTQR' chr5@8252    | 1.77E-10 | 0.004771 |
| 8Mar2011- | 4464  | 741.39  | -17.2291 | 2 K.QKSNWH chr5@1229     | 3.73E-11 | 0.001536 |
| 8Mar2011- | 4579  | 741.39  | -17.2291 | 2 K.QKSNWH chr5@1229     | 9.71E-11 | 0.00306  |
| 8Mar2011- | 11813 | 1030.52 | 12.84278 | 2 L.SPIPEVPC Splice@chr  | 1.50E-15 | 0        |
| 8Mar2011- | 11828 | 855.41  | -22.1447 | 2 _ .HVQEVAI Splice@chr  | 7.61E-11 | 0.002789 |
| 8Mar2011- | 2686  | 409.22  | -18.6349 | 2 R.AGGGTAI chr2@7665    | 9.04E-11 | 0.00306  |
| 8Mar2011- | 15197 | 987.52  | 14.43646 | 3 K.KYLFLDNI chr4@1288   | 7.86E-12 | 3.30E-04 |
| 8Mar2011- | 6094  | 634.87  | 13.67349 | 2 R.IQKCHTLI Splice@chr  | 3.72E-10 | 0.008973 |
| 8Mar2011- | 11643 | 618.32  | 1.155298 | 3 K.LTNLSTA' Splice@chr  | 4.26E-10 | 0.009964 |
| 8Mar2011- | 15811 | 1173.13 | 0.131152 | 2 K.YLGAYLL' Splice@chr  | 2.15E-10 | 0.00526  |
| 8Mar2011- | 15305 | 895.79  | 10.03186 | 3 _ .RELTEEDI Splice@chr | 1.28E-11 | 4.87E-04 |
| 8Mar2011- | 10849 | 725.89  | 9.767307 | 2 I.NFLQLYDI Splice@chr  | 3.80E-10 | 0.008973 |
| 8Mar2011- | 2335  | 490.29  | 7.297594 | 2 K.MNIYVLV chrX@1595    | 3.14E-10 | 0.007155 |
| 8Mar2011- | 4297  | 562.95  | 15.27869 | 3 R.ADALYNF Splice@chr   | 2.18E-11 | 9.55E-04 |
| 8Mar2011- | 4839  | 741.39  | -17.2291 | 2 K.QKSNWH chr5@1229     | 5.86E-11 | 0.002383 |
| 8Mar2011- | 3396  | 519.79  | 5.478159 | 2 K.SIYGLEIS' chr1@4967  | 9.74E-11 | 0.00306  |
| 8Mar2011- | 13148 | 888.47  | 22.8338  | 2 K.DITLEVEA' Splice@chr | 1.14E-12 | 1.78E-04 |
| 8Mar2011- | 12946 | 982     | 10.88823 | 2 R.TVMVQN Splice@chr    | 1.65E-16 | 0        |
| 8Mar2011- | 5772  | 474.75  | 10.307   | 2 K.LNTVCDV chr1@5009    | 3.93E-10 | 0.009351 |
| 8Mar2011- | 11051 | 580.61  | -20.2884 | 3 R.SCLEVGT chr4@1216    | 3.21E-10 | 0.007155 |
| 8Mar2011- | 13200 | 888.47  | 22.8338  | 2 K.DITLEVEA' Splice@chr | 2.34E-13 | 0        |
| 8Mar2011- | 16184 | 805.47  | -13.7324 | 2 K.TPIFIPAP' chr5@1861  | 9.76E-11 | 0.00306  |
| 8Mar2011- | 2581  | 789.44  | 17.96022 | 1 R.FAAPLDR chr3@8971    | 4.09E-10 | 0.009722 |
| 8Mar2011- | 6053  | 591     | -1.24141 | 3 F.ENVVVEVII Splice@chr | 1.39E-12 | 1.78E-04 |
| 8Mar2011- | 15810 | 617.87  | -2.52339 | 2 K.KAGIFQT chr3@2444    | 2.37E-10 | 0.005379 |
| 8Mar2011- | 9040  | 520.81  | -22.5441 | 2 R.VVLEGIP\ Splice@chr  | 1.73E-10 | 0.00465  |
| 8Mar2011- | 5196  | 748.4   | -14.2094 | 2 K.QKSNWH chr5@1229     | 7.24E-11 | 0.002668 |
| 8Mar2011- | 16205 | 634.84  | 6.410455 | 2 R.VDIGDILF Splice@chr  | 1.80E-12 | 1.78E-04 |
| 8Mar2011- | 9168  | 1162.23 | 14.80982 | 3 _ .HTGPGVI Splice@chr  | 5.86E-13 | 1.78E-04 |
| 8Mar2011- | 2522  | 657.39  | 8.089953 | 2 R.QLQMSP chr5@7160     | 1.52E-10 | 0.003967 |
| 8Mar2011- | 12626 | 1153.23 | -17.5731 | 3 F.EGIRTGG' Splice@chr  | 8.12E-13 | 1.78E-04 |
| 8Mar2011- | 18091 | 508.59  | -29.0766 | 3 K.VEFMKH' chr5@1476    | 1.85E-10 | 0.004894 |
| 8Mar2011- | 16899 | 777.08  | 13.6322  | 3 Q.EPVEDGI Splice@chr   | 1.02E-10 | 0.00318  |
| 8Mar2011- | 7088  | 435.25  | -4.00582 | 2 K.KISAHTGI chr4@1727   | 8.39E-11 | 0.002789 |
| 8Mar2011- | 3711  | 439.91  | -18.8195 | 3 R.NSYNGLP chr4@9687    | 1.09E-10 | 0.00318  |
| 8Mar2011- | 5146  | 748.4   | -14.2094 | 2 K.QKSNWH chr5@1229     | 4.07E-11 | 0.001685 |
| 8Mar2011- | 4429  | 462.25  | 15.3693  | 2 K.SFPGGKS chr2@1135    | 1.37E-11 | 4.87E-04 |
| 8Mar2011- | 10590 | 881.93  | 8.56293  | 2 F.LQEQGTY Splice@chr   | 2.97E-11 | 0.001407 |
| 8Mar2011- | 15619 | 895.79  | 10.03186 | 3 _ .RELTEEDI Splice@chr | 1.38E-11 | 4.87E-04 |
| 8Mar2011- | 4520  | 741.39  | -17.2291 | 2 K.QKSNWH chr5@1229     | 3.03E-11 | 0.001407 |

|           |       |         |          |                          |          |          |
|-----------|-------|---------|----------|--------------------------|----------|----------|
| 8Mar2011- | 15648 | 895.79  | 10.03186 | 3 _ .RELTEEDI Splice@chr | 1.12E-11 | 3.30E-04 |
| 8Mar2011- | 10125 | 661.34  | -19.3485 | 3 K.SMEHDQ chr3@8445     | 3.04E-10 | 0.007065 |
| 8Mar2011- | 17204 | 600.32  | -8.55466 | 2 K.TYSISLGG chr5@2080   | 2.32E-10 | 0.005379 |
| 8Mar2011- | 17234 | 860.69  | 14.08015 | 4 R.FQSAAIG Splice@chr   | 7.14E-12 | 3.30E-04 |
| 8Mar2011- | 3798  | 484.74  | 15.01511 | 2 K.FSEKLESE Splice@chr  | 1.84E-10 | 0.004894 |
| 8Mar2011- | 13194 | 1020.79 | 12.87309 | 3 R.MQVLHE Splice@chr    | 3.57E-15 | 0        |
| 8Mar2011- | 11874 | 1030.52 | 12.84278 | 2 L.SPIPEVPC Splice@chr  | 3.23E-19 | 0        |
| 8Mar2011- | 4789  | 741.39  | -17.2291 | 2 K.QKSNWH chr5@1225     | 7.08E-11 | 0.002668 |
| 8Mar2011- | 9166  | 871.93  | 21.18917 | 4 _ .HTGPGVI Splice@chr  | 1.17E-10 | 0.003319 |
| 8Mar2011- | 2323  | 1198.15 | 6.147088 | 2 _ .KIIEFYSKI chr5@1786 | 3.85E-12 | 1.78E-04 |
| 8Mar2011- | 13252 | 1020.79 | 12.87309 | 3 R.MQVLHE Splice@chr    | 6.40E-13 | 1.78E-04 |
| 8Mar2011- | 6184  | 533.82  | 16.26677 | 2 K.TNIYTILTI chr5@1325  | 2.54E-10 | 0.00576  |
| 8Mar2011- | 16873 | 777.08  | 13.6322  | 3 Q.EPVEDGI Splice@chr   | 4.10E-10 | 0.009722 |
| 8Mar2011- | 523   | 873.51  | -11.1925 | 1 R.QLGFPIAI chr3@2252   | 2.84E-10 | 0.006565 |
| 8Mar2011- | 4279  | 843.91  | 2.027504 | 2 R.ADALYNF Splice@chr   | 2.66E-17 | 0        |
| 8Mar2011- | 6242  | 534.32  | 13.11853 | 2 K.TNIYTILTI chr5@1325  | 3.09E-10 | 0.007155 |
| 8Mar2011- | 4897  | 741.39  | -17.2291 | 2 K.QKSNWH chr5@1225     | 2.26E-11 | 9.55E-04 |
| 8Mar2011- | 8813  | 663.85  | -5.06443 | 2 N.KMIFSMI chr4@8622    | 1.25E-10 | 0.003588 |
| 8Mar2011- | 17598 | 783.75  | 7.307848 | 3 K.INWAVTI chr4@2890    | 5.44E-15 | 0        |
| 8Mar2011- | 8856  | 886     | 3.172487 | 2 F.ENVVEVII Splice@chr  | 2.58E-13 | 0        |
| 8Mar2011- | 2272  | 1198.15 | 6.147088 | 2 _ .KIIEFYSKI chr5@1786 | 4.35E-12 | 1.78E-04 |
| 8Mar2011- | 12929 | 765.9   | -6.7028  | 4 R.SK+14.01 chr4@1006   | 1.69E-10 | 0.007283 |
| 8Mar2011- | 5285  | 748.4   | -14.2094 | 2 K.QKSNWH chr5@1225     | 1.91E-11 | 0.001375 |
| 8Mar2011- | 8937  | 886     | 3.172487 | 2 F.ENVVEVII Splice@chr  | 8.58E-12 | 6.34E-04 |
| 8Mar2011- | 5560  | 553.33  | -26.4877 | 2 K.LEPKPGP chr2@1375    | 2.47E-10 | 0.009474 |
| 8Mar2011- | 2162  | 473.26  | -12.1989 | 3 Q.PSGSRSS chr2@1145    | 7.16E-11 | 0.003303 |
| 8Mar2011- | 4912  | 741.39  | -17.2291 | 2 K.QKSNWH chr5@1225     | 1.55E-11 | 0.001203 |
| 8Mar2011- | 2702  | 1198.15 | 6.147088 | 2 _ .KIIEFYSKI chr5@1786 | 4.91E-12 | 2.20E-04 |
| 8Mar2011- | 14228 | 854.82  | 15.56718 | 3 A.EITEMLPi Splice@chr  | 8.59E-13 | 0        |
| 8Mar2011- | 4389  | 843.91  | 2.027504 | 2 R.ADALYNF Splice@chr   | 1.03E-15 | 0        |
| 8Mar2011- | 4621  | 741.39  | -17.2291 | 2 K.QKSNWH chr5@1225     | 3.08E-11 | 0.001931 |
| 8Mar2011- | 8333  | 1017.59 | -22.5744 | 1 R.SSVIMLIV chr2@5767   | 2.85E-11 | 0.001558 |
| 8Mar2011- | 2056  | 452.23  | -1.48793 | 2 R.SGEPLSAi Splice@chr  | 2.99E-11 | 0.001931 |
| 8Mar2011- | 15487 | 895.78  | -1.06827 | 3 _ .RELTEEDI Splice@chr | 4.92E-12 | 2.20E-04 |
| 8Mar2011- | 15155 | 895.78  | -1.06827 | 3 _ .RELTEEDI Splice@chr | 7.14E-13 | 0        |
| 8Mar2011- | 15524 | 895.78  | -1.06827 | 3 _ .RELTEEDI Splice@chr | 3.49E-11 | 0.002118 |
| 8Mar2011- | 12692 | 1182.57 | -12.6646 | 1 R.RFAENQI chr5@1775    | 1.05E-10 | 0.005401 |
| 8Mar2011- | 16472 | 1055.88 | -3.45273 | 3 K.SGTIFDNI Splice@chr  | 1.71E-12 | 0        |
| 8Mar2011- | 13098 | 888.47  | 22.8338  | 2 K.DITLEVEAi Splice@chr | 6.81E-13 | 0        |
| 8Mar2011- | 7673  | 476.73  | -8.21113 | 2 R.SSHEISHF chr5@1494   | 1.53E-10 | 0.007138 |
| 8Mar2011- | 10766 | 694.54  | 11.7794  | 5 _ .HTGPGVI Splice@chr  | 2.09E-11 | 0.001375 |
| 8Mar2011- | 9903  | 942.97  | -28.8151 | 2 _ .MISEFIN\ chrX@5935  | 2.36E-10 | 0.008815 |
| 8Mar2011- | 2098  | 452.23  | -1.48793 | 2 R.SGEPLSAi Splice@chr  | 2.93E-11 | 0.001931 |
| 8Mar2011- | 9842  | 942.97  | -28.8151 | 2 _ .MISEFIN\ chrX@5935  | 2.74E-10 | 0.009936 |
| 8Mar2011- | 10524 | 833.92  | 4.877318 | 2 _ .IDM+15.5 chrX@3237  | 1.66E-10 | 0.007138 |
| 8Mar2011- | 13078 | 1020.79 | 12.87309 | 3 R.MQVLHE Splice@chr    | 8.39E-14 | 0        |
| 8Mar2011- | 4672  | 741.39  | -17.2291 | 2 K.QKSNWH chr5@1225     | 6.53E-11 | 0.003303 |

|           |       |         |          |                         |          |          |
|-----------|-------|---------|----------|-------------------------|----------|----------|
| 8Mar2011- | 12992 | 983.97  | 4.629411 | 2 R.SFSTIPDS chr2@1305  | 5.71E-14 | 0        |
| 8Mar2011- | 2146  | 452.23  | -1.48793 | 2 R.SGEPLSA: Splice@chr | 2.45E-11 | 0.001375 |
| 8Mar2011- | 12748 | 1182.57 | -12.6646 | 1 R.RFAENQI chr5@1775   | 1.23E-10 | 0.005865 |
| 8Mar2011- | 1627  | 535.31  | 16.29583 | 2 K.ENKVKHC chrX@9507   | 1.98E-10 | 0.008253 |
| 8Mar2011- | 17185 | 860.69  | 14.08015 | 4 R.FQSAAIG Splice@chr  | 2.88E-14 | 0        |
| 8Mar2011- | 13845 | 669.36  | -13.2955 | 2 K.LEFNISKI chr1@1931  | 2.51E-11 | 0.001375 |
| 8Mar2011- | 10487 | 748.73  | -12.625  | 3 R.LPSKENLI chr4@5635  | 8.11E-11 | 0.004007 |
| 8Mar2011- | 13133 | 1020.79 | 12.87309 | 3 R.MQVLHE Splice@chr   | 2.44E-13 | 0        |
| 8Mar2011- | 4731  | 741.39  | -17.2291 | 2 K.QKSNWH chr5@1225    | 4.71E-11 | 0.003016 |
| 8Mar2011- | 5952  | 759.41  | 13.03771 | 1 K.TAAGGT( chrX@1696   | 4.17E-13 | 0        |
| 8Mar2011- | 11258 | 1156.89 | 7.624255 | 3 _HTGPGVI Splice@chr   | 6.60E-13 | 0        |
| 8Mar2011- | 16486 | 792.15  | -18.5783 | 4 K.SGTIFDNI Splice@chr | 3.80E-15 | 0        |
| 8Mar2011- | 12829 | 965.77  | 16.46969 | 4 R.K+14.016 chr5@2085  | 9.92E-11 | 0.00487  |
| 8Mar2011- | 5877  | 693.87  | -6.6949  | 2 V.ICVAVGD chr5@1065   | 1.40E-10 | 0.007052 |
| 8Mar2011- | 10890 | 870.48  | 7.030425 | 1 K.ATTQRHF chr2@6975   | 2.59E-10 | 0.009622 |
| 8Mar2011- | 8390  | 509.3   | -20.473  | 2 R.SSVIMLIV chr2@5767  | 1.10E-10 | 0.005548 |
| 8Mar2011- | 8445  | 509.3   | -20.473  | 2 R.SSVIMLIV chr2@5767  | 1.08E-10 | 0.005548 |
| 8Mar2011- | 7624  | 476.73  | -8.21113 | 2 R.SSHEISHF chr5@1494  | 2.45E-10 | 0.009313 |
| 8Mar2011- | 11831 | 1030.52 | 12.84278 | 2 L.SPIEVPC Splice@chr  | 4.65E-18 | 0        |
| 8Mar2011- | 12546 | 1153.23 | -17.5731 | 3 F.EGIRTTG Splice@chr  | 8.01E-14 | 0        |
| 8Mar2011- | 4958  | 741.39  | -17.2291 | 2 K.QKSNWH chr5@1225    | 1.59E-11 | 0.001203 |
| 8Mar2011- | 11780 | 1030.52 | 12.84278 | 2 L.SPIEVPC Splice@chr  | 5.67E-15 | 0        |
| 8Mar2011- | 5016  | 741.39  | -17.2291 | 2 K.QKSNWH chr5@1225    | 3.79E-11 | 0.002305 |
| 8Mar2011- | 15389 | 895.78  | -1.06827 | 3 _RELTEEDI Splice@chr  | 1.13E-10 | 0.005548 |
| 8Mar2011- | 2008  | 452.23  | -1.48793 | 2 R.SGEPLSA: Splice@chr | 2.24E-11 | 0.001375 |
| 8Mar2011- | 13050 | 983.97  | 4.629411 | 2 R.SFSTIPDS chr2@1305  | 1.59E-17 | 0        |
| 8Mar2011- | 589   | 713.88  | -22.346  | 2 K.MKEKK+1 chr4@7820   | 1.15E-10 | 0.005713 |
| 8Mar2011- | 7232  | 435.25  | -4.00582 | 2 K.KISAHGTI chr4@1727  | 8.64E-11 | 0.00436  |
| 8Mar2011- | 1906  | 452.23  | -1.48793 | 2 R.SGEPLSA: Splice@chr | 5.93E-11 | 0.00316  |
| 8Mar2011- | 13028 | 888.47  | 22.8338  | 2 K.DITLEVEA Splice@chr | 4.16E-13 | 0        |
| 8Mar2011- | 1959  | 452.23  | -1.48793 | 2 R.SGEPLSA: Splice@chr | 1.40E-10 | 0.007052 |
| 8Mar2011- | 5230  | 748.4   | -14.2094 | 2 K.QKSNWH chr5@1225    | 2.39E-11 | 0.001375 |
| 8Mar2011- | 17041 | 673.71  | -19.9391 | 3 _CGTVFSK chrX@1165    | 1.10E-10 | 0.005548 |
| 8Mar2011- | 13525 | 1005.16 | -21.3951 | 3 L.LTTCNRRI Splice@chr | 1.58E-10 | 0.003695 |
| 8Mar2011- | 11914 | 671.37  | -24.0361 | 2 T.FNIVHTQ Splice@chr  | 3.22E-10 | 0.00738  |
| 8Mar2011- | 3661  | 409.22  | -18.6349 | 2 R.AGGGTAl chr2@7665   | 5.48E-11 | 0.001592 |
| 8Mar2011- | 952   | 419.23  | -7.22396 | 2 R.RSPELVH chr5@4175   | 4.53E-10 | 0.009054 |
| 8Mar2011- | 15060 | 981.99  | 0.684403 | 2 R.TVMVQN chr4@4655    | 4.44E-20 | 0        |
| 8Mar2011- | 6017  | 787.43  | -1.78505 | 1 K.SDAAPAK chrX@8018   | 2.93E-10 | 0.006962 |
| 8Mar2011- | 1208  | 522.27  | -12.9969 | 2 K.SSSSHARI chr1@5178  | 4.78E-11 | 0.001592 |
| 8Mar2011- | 12454 | 867.92  | 8.25809  | 4 _HTGPGVI Splice@chr   | 1.78E-10 | 0.004024 |
| 8Mar2011- | 6076  | 741.39  | -17.2291 | 2 K.QKSNWH chr5@1225    | 2.32E-11 | 8.34E-04 |
| 8Mar2011- | 6334  | 748.39  | -27.6021 | 2 K.QKSNWH chr5@1225    | 7.08E-11 | 0.002086 |
| 8Mar2011- | 8444  | 435.25  | -4.00582 | 2 K.KISAHGTI chr4@1727  | 4.05E-11 | 0.001592 |
| 8Mar2011- | 14797 | 563.86  | -24.1467 | 2 R.QNK+14. Splice@chr  | 1.01E-10 | 0.002785 |
| 8Mar2011- | 1372  | 422.27  | 2.173301 | 2 K.IGKGEVLI chrX@1204  | 2.01E-10 | 0.004727 |
| 8Mar2011- | 12637 | 1156.9  | 16.3571  | 3 _HTGPGVI Splice@chr   | 3.69E-14 | 0        |

|           |       |         |          |                          |          |          |
|-----------|-------|---------|----------|--------------------------|----------|----------|
| 8Mar2011- | 13031 | 762.93  | 7.897192 | 2 K.CSKNSQII chr5@3746   | 1.23E-10 | 0.003253 |
| 8Mar2011- | 13693 | 1120.58 | -23.7686 | 2 T.RFNFNNTI\ chr2@1312  | 3.32E-10 | 0.00748  |
| 8Mar2011- | 15347 | 888.47  | 22.8338  | 2 K.DITLEVEA Splice@chr  | 5.35E-14 | 0        |
| 8Mar2011- | 1649  | 748.36  | 16.41564 | 1 R.ATAGDGI chr3@5845    | 1.56E-12 | 0        |
| 8Mar2011- | 3653  | 510.3   | 12.8833  | 2 R.RHVAYVF chr1@1479    | 3.00E-10 | 0.007182 |
| 8Mar2011- | 17865 | 895.78  | -1.06827 | 3 _ .RELTEEDI Splice@chr | 5.35E-12 | 0        |
| 8Mar2011- | 17639 | 895.78  | -1.06827 | 3 _ .RELTEEDI Splice@chr | 7.51E-12 | 2.97E-04 |
| 8Mar2011- | 5373  | 438.25  | -7.88684 | 4 K.KKYPLQT chr4@2456    | 9.87E-11 | 0.002549 |
| 8Mar2011- | 5694  | 494.59  | -21.6808 | 3 K.FPENRHI\ chr2@1477   | 4.64E-10 | 0.00915  |
| 8Mar2011- | 5695  | 741.39  | -17.2291 | 2 K.QKSNWH chr5@1229     | 9.34E-11 | 0.002549 |
| 8Mar2011- | 7067  | 464.73  | 11.45108 | 2 R.LFDYENK chrX@5367    | 4.87E-10 | 0.00925  |
| 8Mar2011- | 7450  | 533.82  | 16.26677 | 2 K.TNIYTILTI chr5@1329  | 3.04E-10 | 0.007296 |
| 8Mar2011- | 7455  | 634.87  | 13.67349 | 2 R.IQKCHTLI Splice@chr  | 1.85E-10 | 0.00414  |
| 8Mar2011- | 18678 | 641.31  | -0.8092  | 2 K.K+14.016 chr5@1534   | 1.29E-10 | 0.003253 |
| 8Mar2011- | 14643 | 1062.56 | 21.08375 | 2 _ .RRSLKIAC chr1@9145  | 1.87E-11 | 8.34E-04 |
| 8Mar2011- | 6236  | 869.49  | -11.1741 | 1 R.KIGHTW\ chr3@5992    | 3.84E-10 | 0.008332 |
| 8Mar2011- | 6274  | 626.3   | -9.76097 | 2 R.LCESGAA Splice@chr   | 4.74E-16 | 0        |
| 8Mar2011- | 10918 | 429.75  | -14.7339 | 2 R.IIGDVSVF Splice@chr  | 1.66E-10 | 0.003695 |
| 8Mar2011- | 16263 | 826.45  | 4.477555 | 2 _ .K+14.016 Splice@chr | 4.55E-11 | 0.001592 |
| 8Mar2011- | 17720 | 895.78  | -1.06827 | 3 _ .RELTEEDI Splice@chr | 3.96E-11 | 0.001592 |
| 8Mar2011- | 12508 | 1156.56 | 11.5499  | 3 _ .HTGPGVI Splice@chr  | 9.71E-12 | 2.97E-04 |
| 8Mar2011- | 18005 | 1007.86 | 15.19559 | 3 R.CWNRRA Splice@chr    | 5.32E-11 | 0.001592 |
| 8Mar2011- | 17679 | 895.78  | -1.06827 | 3 _ .RELTEEDI Splice@chr | 5.63E-13 | 0        |
| 8Mar2011- | 6019  | 741.39  | -17.2291 | 2 K.QKSNWH chr5@1229     | 2.78E-11 | 9.71E-04 |
| 8Mar2011- | 12565 | 1156.56 | 11.5499  | 3 _ .HTGPGVI Splice@chr  | 4.44E-14 | 0        |
| 8Mar2011- | 12564 | 867.92  | 8.25809  | 4 _ .HTGPGVI Splice@chr  | 2.06E-10 | 0.004841 |
| 8Mar2011- | 9667  | 1137.64 | -23.9488 | 1 Q.FLVISFA\ chrX@1232   | 4.82E-10 | 0.00925  |
| 8Mar2011- | 7554  | 534.32  | 13.11853 | 2 K.TNIYTILTI chr5@1329  | 1.59E-10 | 0.003695 |
| 8Mar2011- | 2892  | 915.47  | 1.201399 | 1 K.FHEIGGQ chrX@4727    | 1.32E-10 | 0.003253 |
| 8Mar2011- | 5582  | 741.39  | -17.2291 | 2 K.QKSNWH chr5@1229     | 2.57E-11 | 8.34E-04 |
| 8Mar2011- | 14692 | 1062.55 | 11.64973 | 2 _ .RRSLKIAC chr1@9145  | 2.20E-11 | 8.34E-04 |
| 8Mar2011- | 3326  | 498.58  | 26.57833 | 3 R.SQYLQM Splice@chr    | 2.60E-10 | 0.006171 |
| 8Mar2011- | 17340 | 744.72  | 9.520007 | 3 R.MTRVFSI chr3@1715    | 1.60E-11 | 8.34E-04 |
| 8Mar2011- | 12507 | 867.92  | 8.25809  | 4 _ .HTGPGVI Splice@chr  | 4.99E-10 | 0.009574 |
| 8Mar2011- | 18003 | 895.78  | -1.06827 | 3 _ .RELTEEDI Splice@chr | 7.70E-13 | 0        |
| 8Mar2011- | 10891 | 1162.23 | 14.80982 | 3 _ .HTGPGVI Splice@chr  | 1.54E-12 | 0        |
| 8Mar2011- | 18040 | 694.87  | 2.550973 | 2 K.YHNITLQ chrX@3836    | 1.89E-10 | 0.00414  |
| 8Mar2011- | 18132 | 1173.12 | -8.41237 | 2 K.YLGAYLL\ Splice@chr  | 4.97E-11 | 0.001592 |
| 8Mar2011- | 15295 | 888.47  | 22.8338  | 2 K.DITLEVEA Splice@chr  | 4.42E-13 | 0        |
| 8Mar2011- | 19175 | 795.66  | -2.97654 | 4 K.SGTIFDNI Splice@chr  | 5.33E-14 | 0        |
| 8Mar2011- | 5757  | 741.38  | -23.1647 | 2 K.FPENRHI\ chr2@1477   | 1.51E-10 | 0.003695 |
| 8Mar2011- | 594   | 733.39  | -13.2505 | 1 R.FPVGASR chr1@4620    | 4.58E-10 | 0.009054 |
| 8Mar2011- | 16636 | 1167.56 | -16.7225 | 2 L.K+14.016 Splice@chr  | 2.99E-12 | 0        |
| 8Mar2011- | 18661 | 634.84  | 6.410455 | 2 R.VDIGDILF Splice@chr  | 4.50E-12 | 0        |
| 8Mar2011- | 1605  | 748.36  | 16.41564 | 1 R.ATAGDGI chr3@5845    | 1.19E-10 | 0.003023 |
| 8Mar2011- | 1602  | 441.72  | 0.069246 | 2 K.YVGNSQ\ chr5@9135    | 2.91E-10 | 0.006845 |
| 8Mar2011- | 3600  | 510.3   | 12.8833  | 2 R.RHVAYVF chr1@1479    | 1.34E-10 | 0.003367 |

|           |       |         |          |                          |          |          |
|-----------|-------|---------|----------|--------------------------|----------|----------|
| 8Mar2011- | 6921  | 422.75  | 3.545689 | 2 R.LATVTPSI chr5@2075   | 4.47E-10 | 0.009054 |
| 8Mar2011- | 13465 | 1005.16 | -21.3951 | 3 L.LTTCNRRI Splice@chr  | 1.98E-10 | 0.004367 |
| 8Mar2011- | 5635  | 494.59  | -21.6808 | 3 K.FPENRHI\ chr2@1475   | 2.33E-10 | 0.005384 |
| 8Mar2011- | 5636  | 741.39  | -17.2291 | 2 K.QKSNWH chr5@1225     | 3.30E-11 | 0.001372 |
| 8Mar2011- | 12449 | 694.54  | 11.7794  | 5 _ .HTGPGVI Splice@chr  | 3.79E-10 | 0.008238 |
| 8Mar2011- | 1752  | 873.51  | -11.1925 | 1 R.QLGFPIAI chr3@2252   | 3.65E-10 | 0.008019 |
| 8Mar2011- | 13911 | 1030.51 | 3.115089 | 2 L.SPIEVPC Splice@chr   | 5.29E-17 | 0        |
| 8Mar2011- | 14244 | 938.46  | 22.50833 | 2 R.ECSQSDS chr2@8876    | 1.25E-10 | 0.003253 |
| 8Mar2011- | 18622 | 634.84  | 6.410455 | 2 R.VDIGDILF Splice@chr  | 1.24E-12 | 0        |
| 8Mar2011- | 18626 | 805.47  | -13.7324 | 2 K.TPIFIPAP\ chr5@1861  | 3.06E-10 | 0.007296 |
| 8Mar2011- | 12500 | 881.92  | -2.80647 | 2 F.LQEQGTYS Splice@chr  | 5.89E-11 | 0.001716 |
| 8Mar2011- | 4649  | 439.91  | 17.33685 | 3 K.NSQKNPI chr2@3540    | 1.07E-10 | 0.002785 |
| 8Mar2011- | 12961 | 870.48  | 7.030425 | 1 K.ATTQRHF chr2@6975    | 4.69E-10 | 0.00915  |
| 8Mar2011- | 16321 | 895.42  | -21.0176 | 2 M.SCRFLSV chr2@6035    | 5.17E-10 | 0.009781 |
| 8Mar2011- | 625   | 733.39  | -13.2505 | 1 R.FPVGASR chr1@4620    | 3.07E-10 | 0.00738  |
| 8Mar2011- | 11440 | 657.04  | -26.9179 | 3 R.GNVRK+1 chrX@7490    | 1.58E-10 | 0.003695 |
| 8Mar2011- | 13851 | 1030.52 | 12.84278 | 2 L.SPIEVPC Splice@chr   | 2.57E-15 | 0        |
| 8Mar2011- | 17749 | 1003.19 | 17.13413 | 3 R.CWNRRA Splice@chr    | 2.01E-11 | 8.34E-04 |
| 8Mar2011- | 579   | 733.39  | -13.2505 | 1 R.FPVGASR chr1@4620    | 4.13E-10 | 0.008533 |
| 8Mar2011- | 610   | 733.39  | -13.2505 | 1 R.FPVGASR chr1@4620    | 3.05E-10 | 0.007296 |
| 8Mar2011- | 17973 | 895.45  | 3.912341 | 3 _ .RELTEEDI Splice@chr | 1.79E-12 | 0        |
| 8Mar2011- | 3187  | 593.86  | -29.0028 | 2 K.K+14.016 Splice@chr  | 2.83E-10 | 0.006732 |
| 8Mar2011- | 19912 | 1147.25 | 13.44098 | 3 R.FQSAAIG Splice@chr   | 4.48E-16 | 0        |
| 8Mar2011- | 16442 | 991.51  | 24.02083 | 3 _ .IYVPADD Splice@chr  | 4.28E-15 | 0        |
| 8Mar2011- | 1030  | 550.3   | -5.50329 | 2 K.FQKKYQE chr1@1285    | 2.62E-10 | 0.006171 |
| 8Mar2011- | 20322 | 1032.2  | -29.4249 | 3 R.RAFGKEN Splice@chr   | 8.86E-11 | 0.002431 |
| 8Mar2011- | 15270 | 983.97  | 4.629411 | 2 R.SFSTIPDS chr2@1305   | 6.24E-15 | 0        |
| 8Mar2011- | 3869  | 970.47  | 8.573414 | 1 K.FGNWNF chr5@2072     | 1.18E-10 | 0.003023 |
| 8Mar2011- | 3551  | 510.3   | 12.8833  | 2 R.RHVAYVF chr1@1475    | 2.35E-10 | 0.005495 |
| 8Mar2011- | 20346 | 1174.62 | 7.800997 | 2 K.INWAVTI chr4@2890    | 2.14E-21 | 0        |
| 8Mar2011- | 19892 | 1147.24 | 4.705638 | 3 R.FQSAAIG Splice@chr   | 1.45E-12 | 0        |
| 8Mar2011- | 12453 | 1156.56 | 11.5499  | 3 _ .HTGPGVI Splice@chr  | 1.93E-12 | 0        |
| 8Mar2011- | 5510  | 462.25  | 15.3693  | 2 K.SFPGGKS chr2@1135    | 6.79E-12 | 1.53E-04 |
| 8Mar2011- | 14044 | 858.48  | 6.006088 | 3 _ .LETGIIP\ Splice@chr | 6.68E-12 | 1.53E-04 |
| 8Mar2011- | 9723  | 1137.64 | -23.9488 | 1 Q.FLVISFA\ chrX@1232   | 2.23E-10 | 0.005165 |
| 8Mar2011- | 6390  | 748.39  | -27.6021 | 2 K.QKSNWH chr5@1225     | 4.96E-11 | 0.001592 |
| 8Mar2011- | 18593 | 805.47  | -13.7324 | 2 K.TPIFIPAP\ chr5@1861  | 1.48E-10 | 0.003598 |
| 8Mar2011- | 14226 | 888.47  | 22.8338  | 2 K.DITLEVEA Splice@chr  | 2.31E-13 | 0        |
| 8Mar2011- | 17424 | 918.45  | 1.886417 | 3 K.M+15.99 chr5@1445    | 5.99E-11 | 0.00119  |
| 8Mar2011- | 16762 | 1003.19 | 17.13413 | 3 R.CWNRRA Splice@chr    | 2.14E-13 | 0        |
| 8Mar2011- | 9638  | 886     | 3.172487 | 2 F.ENVVVEVII Splice@chr | 2.66E-13 | 0        |
| 8Mar2011- | 9636  | 663.85  | -5.06443 | 2 N.KMIFSMI chr4@8622    | 2.35E-10 | 0.005923 |
| 8Mar2011- | 16454 | 665.37  | -26.6417 | 2 Q.INNK+14 Splice@chr   | 2.47E-10 | 0.006269 |
| 8Mar2011- | 9925  | 1162.23 | 14.80982 | 3 _ .HTGPGVI Splice@chr  | 7.59E-12 | 0        |
| 8Mar2011- | 17077 | 895.78  | -1.06827 | 3 _ .RELTEEDI Splice@chr | 2.94E-13 | 0        |
| 8Mar2011- | 15532 | 937     | -18.3647 | 2 R.NPFLEEV\ chr3@1097   | 2.01E-11 | 0        |
| 8Mar2011- | 4877  | 741.39  | -17.2291 | 2 K.QKSNWH chr5@1225     | 2.27E-11 | 0        |

|           |       |         |          |                          |          |          |
|-----------|-------|---------|----------|--------------------------|----------|----------|
| 8Mar2011- | 13923 | 965.77  | 2.231213 | 4 R.FPHFRAS chr1@4387    | 2.61E-10 | 0.006603 |
| 8Mar2011- | 15152 | 669.36  | -13.2955 | 2 K.LEFNISK chr1@1931    | 2.54E-11 | 0        |
| 8Mar2011- | 3090  | 497.93  | -24.8103 | 3 K.NAYFSK+ chr2@1344    | 3.03E-10 | 0.00761  |
| 8Mar2011- | 8783  | 1137.65 | -15.1425 | 1 Q.FLVISFA\ chrX@1232   | 1.86E-10 | 0.004175 |
| 8Mar2011- | 12828 | 1030.51 | 3.115089 | 2 L.SPIPEVPC Splice@chr  | 9.78E-19 | 0        |
| 8Mar2011- | 6617  | 533.82  | 16.26677 | 2 K.TNIYTILTI chr5@1329  | 2.91E-10 | 0.007511 |
| 8Mar2011- | 13983 | 965.77  | 16.46969 | 4 R.KTSSCQK chr5@2085    | 1.71E-10 | 0.004175 |
| 8Mar2011- | 19752 | 491.01  | -24.5182 | 4 K.TKENAIP\ chrX@8495   | 1.66E-10 | 0.004084 |
| 8Mar2011- | 5159  | 741.39  | -17.2291 | 2 K.QKSNWH chr5@1229     | 9.55E-12 | 0        |
| 8Mar2011- | 13624 | 1153.23 | -17.5731 | 3 F.EGIRTGG Splice@chr   | 1.64E-15 | 0        |
| 8Mar2011- | 3258  | 439.91  | 17.33685 | 3 K.NSQKNPI chr2@3540    | 2.49E-10 | 0.006381 |
| 8Mar2011- | 12775 | 1030.52 | 12.84278 | 2 L.SPIPEVPC Splice@chr  | 4.35E-16 | 0        |
| 8Mar2011- | 11255 | 694.54  | 11.7794  | 5 _ .HTGPGVI Splice@chr  | 3.60E-11 | 8.14E-04 |
| 8Mar2011- | 11258 | 1156.9  | 16.3571  | 3 _ .HTGPGVI Splice@chr  | 7.70E-17 | 0        |
| 8Mar2011- | 15150 | 848.97  | 0.791766 | 2 R.LLELAPT\ chr2@6685   | 7.58E-17 | 0        |
| 8Mar2011- | 19665 | 783.75  | 7.307848 | 3 K.INWAVTI chr4@2890    | 7.34E-13 | 0        |
| 8Mar2011- | 1742  | 451.74  | -9.54655 | 2 K.NVERGA1 chr5@1114    | 7.45E-12 | 0        |
| 8Mar2011- | 11845 | 870.48  | 7.030425 | 1 K.ATTQRHF chr2@6975    | 3.51E-10 | 0.008134 |
| 8Mar2011- | 4664  | 554.79  | -16.4218 | 2 R.FSRQGIV Splice@chr   | 1.08E-10 | 0.002422 |
| 8Mar2011- | 6697  | 552.35  | -1.66054 | 2 K.KVEIFRIA chr5@1914   | 9.11E-11 | 0.001805 |
| 8Mar2011- | 16699 | 1104.83 | 4.296498 | 3 S.EDLGSDA Splice@chr   | 2.36E-16 | 0        |
| 8Mar2011- | 16704 | 828.88  | 11.08136 | 4 S.EDLGSDA Splice@chr   | 1.68E-15 | 0        |
| 8Mar2011- | 783   | 425.22  | -10.657  | 2 K.HLNEHAK chr5@5137    | 3.38E-10 | 0.008134 |
| 8Mar2011- | 10389 | 657.04  | -26.9179 | 3 R.GNVRK+1 chrX@7490    | 1.83E-10 | 0.004175 |
| 8Mar2011- | 10981 | 671.37  | -24.0361 | 2 T.FNIVHTQ Splice@chr   | 3.64E-10 | 0.008338 |
| 8Mar2011- | 19150 | 860.69  | 14.08015 | 4 R.FQSAAIG Splice@chr   | 1.92E-13 | 0        |
| 8Mar2011- | 16732 | 895.78  | -1.06827 | 3 _ .RELTEEDI Splice@chr | 4.63E-11 | 0.001067 |
| 8Mar2011- | 16682 | 895.78  | -1.06827 | 3 _ .RELTEEDI Splice@chr | 1.98E-13 | 0        |
| 8Mar2011- | 12911 | 858.48  | 6.006088 | 3 _ .LETGIKPI Splice@chr | 6.62E-12 | 0        |
| 8Mar2011- | 17411 | 675.38  | -7.47071 | 2 R.IENFNITL chr4@1028   | 4.17E-10 | 0.009662 |
| 8Mar2011- | 17787 | 805.47  | -13.7324 | 2 K.TPIFIPAP\ chr5@1861  | 2.96E-11 | 2.75E-04 |
| 8Mar2011- | 14147 | 983.97  | 4.629411 | 2 R.SFSTIPDS chr2@1305   | 1.19E-17 | 0        |
| 8Mar2011- | 2749  | 692.35  | 11.91862 | 2 K.TAEHVEC Splice@chr   | 6.79E-13 | 0        |
| 8Mar2011- | 5212  | 741.39  | -17.2291 | 2 K.QKSNWH chr5@1229     | 1.60E-11 | 0        |
| 8Mar2011- | 12302 | 838.94  | -22.1914 | 2 R.QFADLPS chr5@1898    | 3.58E-10 | 0.008134 |
| 8Mar2011- | 15339 | 991.51  | 24.02083 | 3 _ .IYVPADD Splice@chr  | 2.02E-15 | 0        |
| 8Mar2011- | 11254 | 867.92  | 8.25809  | 4 _ .HTGPGVI Splice@chr  | 3.09E-10 | 0.00761  |
| 8Mar2011- | 6565  | 533.82  | 16.26677 | 2 K.TNIYTILTI chr5@1329  | 1.56E-10 | 0.004084 |
| 8Mar2011- | 4769  | 741.39  | -17.2291 | 2 K.QKSNWH chr5@1229     | 3.08E-11 | 2.75E-04 |
| 8Mar2011- | 9580  | 663.85  | -5.06443 | 2 N.KMIFSMI chr4@8622    | 2.63E-10 | 0.006603 |
| 8Mar2011- | 13677 | 1153.23 | -17.5731 | 3 F.EGIRTGG Splice@chr   | 2.13E-12 | 0        |
| 8Mar2011- | 17746 | 634.84  | 6.410455 | 2 R.VDIGDILF Splice@chr  | 8.73E-13 | 0        |
| 8Mar2011- | 13626 | 735.87  | 5.279186 | 2 K.QSTM+1\ chr1@8627    | 5.79E-11 | 0.00119  |
| 8Mar2011- | 5562  | 748.4   | -14.2094 | 2 K.QKSNWH chr5@1229     | 7.53E-12 | 0        |
| 8Mar2011- | 17798 | 634.84  | 6.410455 | 2 R.VDIGDILF Splice@chr  | 1.78E-12 | 0        |
| 8Mar2011- | 12266 | 801.71  | 5.720343 | 3 K.FFKPNTD chr5@7527    | 6.06E-16 | 0        |
| 8Mar2011- | 16401 | 665.37  | -26.6417 | 2 Q.INNK+14 Splice@chr   | 1.32E-10 | 0.003149 |

|           |       |         |          |                         |          |          |
|-----------|-------|---------|----------|-------------------------|----------|----------|
| 8Mar2011- | 4935  | 741.39  | -17.2291 | 2 K.QKSNWH chr5@1229    | 5.01E-11 | 0.001067 |
| 8Mar2011- | 16525 | 965.48  | -19.9748 | 2 _RFAEFAG chr2@1518    | 1.67E-10 | 0.004084 |
| 8Mar2011- | 16522 | 987.51  | 4.289691 | 3 K.KYLFLDNI chr4@1288  | 8.66E-11 | 0.001805 |
| 8Mar2011- | 14571 | 829.44  | 22.15469 | 2 R.FADLPFA chr2@1282   | 1.37E-10 | 0.003514 |
| 8Mar2011- | 19447 | 770.77  | -11.1838 | 3 K.YLDAKCK chr4@3751   | 3.69E-10 | 0.008338 |
| 8Mar2011- | 19147 | 688.75  | 8.895763 | 5 R.FQSAAIG Splice@chr  | 8.68E-12 | 0        |
| 8Mar2011- | 6253  | 869.49  | -11.1741 | 1 R.KIGHTWH chr3@5992   | 2.98E-10 | 0.007511 |
| 8Mar2011- | 6677  | 534.32  | 13.11853 | 2 K.TNIYTILTI chr5@1329 | 1.67E-10 | 0.004084 |
| 8Mar2011- | 12322 | 801.71  | 5.720343 | 3 K.FFKPNTD chr5@7527   | 9.41E-17 | 0        |
| 8Mar2011- | 5261  | 741.39  | -17.2291 | 2 K.QKSNWH chr5@1229    | 2.04E-11 | 0        |
| 8Mar2011- | 17687 | 640.88  | 0.667706 | 2 P.PKKSIVPF Splice@chr | 2.29E-10 | 0.005691 |
| 8Mar2011- | 4823  | 741.39  | -17.2291 | 2 K.QKSNWH chr5@1229    | 2.19E-11 | 0        |
| 8Mar2011- | 10004 | 694.39  | 25.0635  | 2 K.NVISSLQI chr2@5301  | 3.06E-10 | 0.00761  |
| 8Mar2011- | 2801  | 692.35  | 11.91862 | 2 K.TAEHVEC Splice@chr  | 1.08E-12 | 0        |
| 8Mar2011- | 13993 | 888.47  | 22.8338  | 2 K.DITLEVEA Splice@chr | 6.80E-11 | 0.001316 |
| 8Mar2011- | 2029  | 616.84  | -0.09911 | 2 _SSRHLPIS Splice@chr  | 9.54E-11 | 0.002057 |
| 8Mar2011- | 11996 | 1156.89 | 7.624255 | 3 _HTGPGVI Splice@chr   | 3.14E-13 | 0        |
| 8Mar2011- | 14207 | 983.97  | 4.629411 | 2 R.SFSTIPDS chr2@1309  | 1.03E-17 | 0        |
| 8Mar2011- | 12431 | 669.36  | -13.2955 | 2 K.LEFNISKI chr1@1931  | 3.18E-11 | 3.35E-04 |
| 8Mar2011- | 11440 | 965.52  | 17.33925 | 4 R.KTSSCQK chr5@2089   | 9.09E-12 | 0        |
| 8Mar2011- | 150   | 659.85  | 8.986163 | 2 K.RERM+15 chr4@1242   | 1.84E-10 | 0.003491 |
| 8Mar2011- | 12738 | 1167.56 | -16.7225 | 2 L.K+14.016 Splice@chr | 7.84E-14 | 0        |
| 8Mar2011- | 2352  | 626.3   | -9.76097 | 2 R.LCESGAA Splice@chr  | 3.99E-16 | 0        |
| 8Mar2011- | 16388 | 783.75  | 7.307848 | 3 K.INWAVTI chr4@2890   | 3.36E-13 | 0        |
| 8Mar2011- | 7353  | 1162.23 | 14.80982 | 3 _HTGPGVI Splice@chr   | 1.97E-12 | 0        |
| 8Mar2011- | 8732  | 694.54  | 11.7794  | 5 _HTGPGVI Splice@chr   | 8.19E-11 | 0.001752 |
| 8Mar2011- | 330   | 741.39  | -17.2291 | 2 K.QKSNWH chr5@1229    | 4.43E-11 | 6.49E-04 |
| 8Mar2011- | 2047  | 435.25  | -4.00582 | 2 K.KISAHGTI chr4@1727  | 3.37E-11 | 3.35E-04 |
| 8Mar2011- | 15838 | 479.23  | 16.46445 | 2 _FRFGDCR chr4@1146    | 3.43E-10 | 0.006876 |
| 8Mar2011- | 2531  | 741.39  | -17.2291 | 2 K.QKSNWH chr5@1229    | 2.42E-11 | 0        |
| 8Mar2011- | 12575 | 812.41  | -7.63836 | 2 R.ELAPVK+ chrX@5664   | 1.24E-10 | 0.002805 |
| 8Mar2011- | 15949 | 860.69  | 14.08015 | 4 R.FQSAAIG Splice@chr  | 5.53E-13 | 0        |
| 8Mar2011- | 14166 | 895.79  | 10.03186 | 3 _RELTEEDI Splice@chr  | 2.98E-12 | 0        |
| 8Mar2011- | 16402 | 783.75  | 7.307848 | 3 K.INWAVTI chr4@2890   | 7.93E-12 | 0        |
| 8Mar2011- | 173   | 420.72  | 12.72454 | 2 _RYTDTGK chr1@7224    | 3.78E-10 | 0.008124 |
| 8Mar2011- | 2615  | 741.39  | -17.2291 | 2 K.QKSNWH chr5@1229    | 1.16E-10 | 0.002655 |
| 8Mar2011- | 15988 | 1147.25 | 13.44098 | 3 R.FQSAAIG Splice@chr  | 5.68E-15 | 0        |
| 8Mar2011- | 15980 | 688.75  | 8.895763 | 5 R.FQSAAIG Splice@chr  | 3.82E-12 | 0        |
| 8Mar2011- | 7430  | 694.39  | 25.0635  | 2 K.NVISSLQI chr2@5301  | 1.83E-10 | 0.003345 |
| 8Mar2011- | 3710  | 424.71  | 0.936339 | 2 K.TENSVNC Splice@chr  | 1.31E-10 | 0.00294  |
| 8Mar2011- | 8800  | 881.92  | -2.80647 | 2 F.LQEQGTI Splice@chr  | 3.35E-11 | 3.35E-04 |
| 8Mar2011- | 2379  | 626.3   | -9.76097 | 2 R.LCESGAA Splice@chr  | 3.60E-16 | 0        |
| 8Mar2011- | 5608  | 725.88  | 19.33943 | 2 R.MEHLCRI chrX@1262   | 3.36E-10 | 0.006876 |
| 8Mar2011- | 2410  | 626.3   | -9.76097 | 2 R.LCESGAA Splice@chr  | 3.89E-16 | 0        |
| 8Mar2011- | 8708  | 1156.9  | 16.3571  | 3 _HTGPGVI Splice@chr   | 5.45E-16 | 0        |
| 8Mar2011- | 10516 | 779.7   | -18.8112 | 3 ?.AQDNYM Splice@chr   | 4.60E-11 | 6.49E-04 |
| 8Mar2011- | 3821  | 533.82  | 16.26677 | 2 K.TNIYTILTI chr5@1329 | 4.72E-10 | 0.009622 |

|           |       |         |          |                           |          |          |
|-----------|-------|---------|----------|---------------------------|----------|----------|
| 8Mar2011- | 3843  | 734.43  | 10.70263 | 2 L.TEQSVFK' chr5@2036    | 1.41E-10 | 0.00294  |
| 8Mar2011- | 11526 | 888.47  | 22.8338  | 2 K.DITLEVEA' Splice@chr  | 7.93E-13 | 0        |
| 8Mar2011- | 14786 | 805.47  | -13.7324 | 2 K.TPIFIPAP' chr5@1861   | 1.31E-10 | 0.00294  |
| 8Mar2011- | 14782 | 634.84  | 6.410455 | 2 R.VDIGDILF Splice@chr   | 6.07E-12 | 0        |
| 8Mar2011- | 13785 | 895.78  | -1.06827 | 3 _..RELTEEDI Splice@chr  | 3.28E-12 | 0        |
| 8Mar2011- | 12785 | 1167.56 | -16.7225 | 2 L.K+14.016 Splice@chr   | 1.14E-12 | 0        |
| 8Mar2011- | 12782 | 937     | -18.3647 | 2 R.NPFLEEV' Splice@chr   | 5.61E-12 | 0        |
| 8Mar2011- | 11432 | 983.97  | 4.629411 | 2 R.SFSTIPDS chr2@1305    | 5.53E-16 | 0        |
| 8Mar2011- | 12420 | 849.48  | 10.61812 | 2 R.LLELAPTC chr2@6685    | 1.96E-18 | 0        |
| 8Mar2011- | 14743 | 805.47  | -13.7324 | 2 K.TPIFIPAP' chr5@1861   | 2.49E-10 | 0.005517 |
| 8Mar2011- | 8765  | 1156.57 | 20.14189 | 3 _..HTGPGVI Splice@chr   | 4.01E-12 | 0        |
| 8Mar2011- | 3202  | 414.58  | 2.06613  | 3 K.KNGNGIC chr4@8682     | 3.09E-10 | 0.006618 |
| 8Mar2011- | 11472 | 888.47  | 22.8338  | 2 K.DITLEVEA' Splice@chr  | 4.66E-13 | 0        |
| 8Mar2011- | 11470 | 768.89  | -24.3218 | 2 R.FM+15.9' chrX@9155    | 1.99E-10 | 0.00393  |
| 8Mar2011- | 3880  | 534.32  | 13.11853 | 2 K.TNIYTILTI chr5@1325   | 2.36E-10 | 0.00464  |
| 8Mar2011- | 16394 | 1175.13 | 14.90082 | 2 K.INWAVTI chr4@2890     | 1.41E-24 | 0        |
| 8Mar2011- | 3932  | 534.32  | 13.11853 | 2 K.TNIYTILTI chr5@1325   | 2.22E-10 | 0.004358 |
| 8Mar2011- | 3625  | 434.24  | 13.9946  | 3 _..RSNDQTI chr5@6378    | 2.72E-10 | 0.005935 |
| 8Mar2011- | 16217 | 960.49  | -5.15365 | 3 N.GFEPRLA Splice@chr    | 3.80E-11 | 5.00E-04 |
| 8Mar2011- | 9227  | 762.93  | 7.897192 | 2 K.CSKNSQII chr5@3746    | 3.27E-10 | 0.006876 |
| 8Mar2011- | 6474  | 623.32  | 24.39438 | 2 K.MNNLDL' chr1@1330     | 3.63E-11 | 3.35E-04 |
| 8Mar2011- | 6470  | 509.3   | -20.473  | 2 R.SSVIMLIV chr2@5767    | 1.44E-10 | 0.003076 |
| 8Mar2011- | 10075 | 1030.52 | 12.84278 | 2 L.SPIPEVPC Splice@chr   | 4.06E-18 | 0        |
| 8Mar2011- | 10843 | 1153.23 | -17.5731 | 3 F.EGIRTGG' Splice@chr   | 1.97E-14 | 0        |
| 8Mar2011- | 2572  | 741.39  | -17.2291 | 2 K.QKSNGWH chr5@1225     | 1.18E-11 | 0        |
| 8Mar2011- | 2565  | 494.59  | -21.6808 | 3 K.FPENRHI' chr2@1477    | 2.97E-10 | 0.006348 |
| 8Mar2011- | 4190  | 533.82  | 16.26677 | 2 K.TNIYTILTI chr5@1325   | 1.87E-10 | 0.003642 |
| 8Mar2011- | 15364 | 685.71  | -3.06095 | 3 K.YPVYSK+' chr3@5207    | 1.58E-10 | 0.003196 |
| 8Mar2011- | 10022 | 1030.52 | 12.84278 | 2 L.SPIPEVPC Splice@chr   | 1.39E-15 | 0        |
| 8Mar2011- | 15890 | 688.04  | 26.06008 | 3 K.MIFSLDPI Splice@chr   | 3.13E-10 | 0.006618 |
| 8Mar2011- | 12370 | 848.98  | 12.59627 | 2 R.LLELAPTC chr2@6685    | 6.04E-18 | 0        |
| 8Mar2011- | 6423  | 509.3   | -20.473  | 2 R.SSVIMLIV chr2@5767    | 3.76E-11 | 3.35E-04 |
| 8Mar2011- | 195   | 420.72  | 12.72454 | 2 _..RYTDTGK chr1@7224    | 3.13E-10 | 0.006618 |
| 8Mar2011- | 5407  | 695.42  | -0.61526 | 1 R.GAGIHIK' chrX@7405    | 4.79E-10 | 0.009894 |
| 8Mar2011- | 12745 | 899.47  | 5.842265 | 2 R.SK+14.01 chrX@1700    | 2.99E-10 | 0.006348 |
| 8Mar2011- | 15968 | 860.69  | 14.08015 | 4 R.FQSAAIG Splice@chr    | 1.33E-14 | 0        |
| 8Mar2011- | 10962 | 1153.23 | -17.5731 | 3 F.EGIRTGG' Splice@chr   | 1.44E-10 | 0.003076 |
| 8Mar2011- | 12792 | 899.97  | 3.975293 | 2 R.SK+14.01 chrX@1700    | 2.63E-10 | 0.005649 |
| 8Mar2011- | 13827 | 895.78  | -1.06827 | 3 _..RELTEEDI Splice@chr  | 9.49E-12 | 0        |
| 8Mar2011- | 12772 | 1187.58 | 10.28775 | 3 R.NGAPPSC Splice@chr    | 3.21E-10 | 0.006757 |
| 8Mar2011- | 18237 | 688.75  | 8.895763 | 5 R.FQSAAIG Splice@chr    | 2.08E-10 | 0.006036 |
| 8Mar2011- | 13635 | 965.77  | 2.231213 | 4 R.FPHFRAS chr1@4387     | 2.20E-10 | 0.006553 |
| 8Mar2011- | 17060 | 805.97  | -15.8175 | 2 K.TPIFIPAP' chr5@1861   | 6.42E-12 | 3.42E-04 |
| 8Mar2011- | 6689  | 517.8   | -19.2081 | 2 R.FPITFALP chr3@6237    | 2.29E-10 | 0.006671 |
| 8Mar2011- | 5296  | 741.39  | -17.2291 | 2 K.QKSNGWH chr5@1225     | 2.71E-11 | 9.26E-04 |
| 8Mar2011- | 2852  | 1198.15 | 6.147088 | 2 _..KIIEFYSKI' chr5@1786 | 9.76E-12 | 5.07E-04 |
| 8Mar2011- | 2723  | 915.47  | 1.201399 | 1 K.FHEIGGQ chrX@4727     | 6.40E-11 | 0.001773 |

|           |       |         |          |                         |          |          |
|-----------|-------|---------|----------|-------------------------|----------|----------|
| 8Mar2011- | 10466 | 887.87  | 19.11034 | 2 V.EGMADC Splice@chr   | 2.31E-11 | 9.26E-04 |
| 8Mar2011- | 13863 | 983.97  | 4.629411 | 2 R.SFSTIPDS chr2@1305  | 9.02E-19 | 0        |
| 8Mar2011- | 5156  | 741.39  | -17.2291 | 2 K.QKSNWH chr5@1225    | 2.82E-11 | 9.26E-04 |
| 8Mar2011- | 12977 | 780.03  | -24.5321 | 3 ?.AQDNYM Splice@chr   | 6.43E-11 | 0.001773 |
| 8Mar2011- | 6771  | 533.82  | 16.26677 | 2 K.TNIYTILTI chr5@1325 | 7.65E-11 | 0.002496 |
| 8Mar2011- | 5047  | 741.39  | -17.2291 | 2 K.QKSNWH chr5@1225    | 8.48E-11 | 0.003036 |
| 8Mar2011- | 7236  | 717.89  | -17.2831 | 2 K.LRGWNK chr3@8881    | 3.46E-10 | 0.00876  |
| 8Mar2011- | 5346  | 741.39  | -17.2291 | 2 K.QKSNWH chr5@1225    | 4.55E-11 | 0.001651 |
| 8Mar2011- | 11403 | 1156.56 | 11.5499  | 3 _.HTGPGVI Splice@chr  | 3.15E-14 | 0        |
| 8Mar2011- | 2342  | 544.8   | 7.520127 | 2 K.KDLEVEV Splice@chr  | 3.48E-10 | 0.00876  |
| 8Mar2011- | 15776 | 746.91  | 13.99266 | 2 V.EK+14.01 Splice@chr | 9.26E-11 | 0.003036 |
| 8Mar2011- | 5577  | 626.3   | -9.76097 | 2 R.LCESGAA Splice@chr  | 4.72E-16 | 0        |
| 8Mar2011- | 5016  | 462.25  | 15.3693  | 2 K.SFPGGKS chr2@1135   | 9.79E-12 | 5.07E-04 |
| 8Mar2011- | 7740  | 435.25  | -4.00582 | 2 K.KISAHGTI chr4@1727  | 2.67E-10 | 0.007412 |
| 8Mar2011- | 5534  | 626.3   | -9.76097 | 2 R.LCESGAA Splice@chr  | 6.64E-16 | 0        |
| 8Mar2011- | 10589 | 933.41  | -17.4121 | 2 S.SPEVPEN Splice@chr  | 2.34E-12 | 1.81E-04 |
| 8Mar2011- | 13327 | 1153.23 | -17.5731 | 3 F.EGIRTGG Splice@chr  | 2.86E-13 | 0        |
| 8Mar2011- | 6176  | 640.81  | -21.5267 | 2 K.FETFFVSF chr1@6740  | 2.27E-10 | 0.006671 |
| 8Mar2011- | 5469  | 489.28  | 28.87637 | 2 R.RGTASRS chr5@1951   | 1.94E-12 | 1.81E-04 |
| 8Mar2011- | 5617  | 748.4   | -14.2094 | 2 K.QKSNWH chr5@1225    | 2.20E-11 | 9.26E-04 |
| 8Mar2011- | 11321 | 1156.56 | 11.5499  | 3 _.HTGPGVI Splice@chr  | 8.64E-13 | 0        |
| 8Mar2011- | 4369  | 439.91  | -1.85417 | 3 K.VAGSGSL chr5@1747   | 3.58E-10 | 0.009404 |
| 8Mar2011- | 14740 | 669.36  | -13.2955 | 2 K.LEFNISKI chr1@1931  | 3.76E-11 | 0.001378 |
| 8Mar2011- | 2775  | 915.47  | 1.201399 | 1 K.FHEIGGQ chrX@4727   | 1.44E-10 | 0.004508 |
| 8Mar2011- | 2896  | 1198.14 | -2.21785 | 2 _.KIIEFYSKI chr5@1786 | 1.48E-11 | 8.06E-04 |
| 8Mar2011- | 16050 | 895.78  | -1.06827 | 3 _.RELTEEDI Splice@chr | 1.03E-11 | 6.63E-04 |
| 8Mar2011- | 16407 | 895.78  | -1.06827 | 3 _.RELTEEDI Splice@chr | 1.14E-11 | 6.63E-04 |
| 8Mar2011- | 18524 | 783.75  | 7.307848 | 3 K.INWAVTI chr4@2890   | 6.79E-16 | 0        |
| 8Mar2011- | 6965  | 534.32  | 13.11853 | 2 K.TNIYTILTI chr5@1325 | 1.85E-10 | 0.00553  |
| 8Mar2011- | 17104 | 805.47  | -13.7324 | 2 K.TPIFIPAP chr5@1861  | 1.28E-11 | 8.06E-04 |
| 8Mar2011- | 17103 | 634.84  | 6.410455 | 2 R.VDIGDILF Splice@chr | 7.84E-11 | 0.002773 |
| 8Mar2011- | 3044  | 458.24  | 3.604198 | 2 K.FHEIGGQ chrX@4727   | 1.19E-10 | 0.00357  |
| 8Mar2011- | 12560 | 1030.01 | 4.745214 | 2 L.SPIPEVPC Splice@chr | 2.51E-19 | 0        |
| 8Mar2011- | 13808 | 983.47  | 6.336758 | 2 R.SFSTIPDS chr2@1305  | 3.85E-14 | 0        |
| 8Mar2011- | 8762  | 1137.65 | -15.1425 | 1 Q.FLVISFA\ chrX@1237  | 3.14E-10 | 0.008155 |
| 8Mar2011- | 18246 | 860.69  | 14.08015 | 4 R.FQSAAIG Splice@chr  | 1.72E-15 | 0        |
| 8Mar2011- | 10519 | 871.92  | 9.692321 | 4 _.HTGPGVI Splice@chr  | 1.09E-11 | 6.63E-04 |
| 8Mar2011- | 13997 | 737.91  | -11.6435 | 2 R.YNFLIFRP chr1@5392  | 1.00E-10 | 0.003448 |
| 8Mar2011- | 5098  | 741.39  | -17.2291 | 2 K.QKSNWH chr5@1225    | 3.60E-11 | 0.001227 |
| 8Mar2011- | 15019 | 899.47  | 5.842265 | 2 R.SKNKK+1 chrX@1700   | 6.59E-11 | 0.001773 |
| 8Mar2011- | 15076 | 1187.58 | 10.28775 | 3 R.NGAPPSC Splice@chr  | 1.18E-10 | 0.00357  |
| 8Mar2011- | 15069 | 899.97  | 3.975293 | 2 R.SK+14.01 chrX@1700  | 9.90E-11 | 0.003321 |
| 8Mar2011- | 12616 | 1030.01 | 4.745214 | 2 L.SPIPEVPC Splice@chr | 7.12E-18 | 0        |
| 8Mar2011- | 4015  | 859.49  | -21.2086 | 1 K.DTAVAIIF chrX@8477  | 2.54E-10 | 0.007039 |
| 8Mar2011- | 4011  | 439.91  | 17.33685 | 3 K.NSQKNPI chr2@3540   | 1.24E-10 | 0.003691 |
| 8Mar2011- | 1538  | 437.76  | -12.5192 | 2 R.QLGFPIAI chr3@2252  | 2.78E-10 | 0.007659 |
| 8Mar2011- | 18251 | 688.75  | 8.895763 | 5 R.FQSAAIG Splice@chr  | 2.37E-10 | 0.006792 |

|           |       |         |          |                          |          |          |
|-----------|-------|---------|----------|--------------------------|----------|----------|
| 8Mar2011- | 9366  | 558.3   | -2.40945 | 3 R.EK+14.01 chr1@1077   | 4.43E-11 | 0.001651 |
| 8Mar2011- | 14997 | 1172.62 | -6.98068 | 2 K.YLGAYLL\ Splice@chr  | 1.09E-10 | 0.001814 |
| 8Mar2011- | 12963 | 669.35  | -28.2834 | 2 K.LEFNISK\ chr1@1931   | 2.09E-11 | 7.46E-04 |
| 8Mar2011- | 14830 | 1007.86 | 15.19559 | 3 R.CWNRRA Splice@chr    | 2.20E-11 | 7.46E-04 |
| 8Mar2011- | 7404  | 663.85  | -5.06443 | 2 N.KMIFSMI chr4@8622    | 4.26E-10 | 0.00796  |
| 8Mar2011- | 11550 | 826.48  | -13.7526 | 2 R.RVPLPEG Splice@chr   | 7.14E-14 | 0        |
| 8Mar2011- | 3090  | 435.25  | -4.00582 | 2 K.KISAHGTI chr4@1727   | 1.96E-10 | 0.002817 |
| 8Mar2011- | 9262  | 1156.9  | 16.3571  | 3 _ .HTGPGVI Splice@chr  | 1.23E-15 | 0        |
| 8Mar2011- | 5508  | 464.75  | 21.61092 | 2 R.FEKAGGY chr5@1660    | 7.40E-11 | 9.92E-04 |
| 8Mar2011- | 2857  | 787.43  | -1.78505 | 1 K.SDAAPAK chrX@8018    | 2.14E-10 | 0.003079 |
| 8Mar2011- | 4146  | 1105.69 | 1.052675 | 1 K.FIILMIIN\ chrX@1342  | 5.46E-10 | 0.009785 |
| 8Mar2011- | 7682  | 1162.23 | 14.80982 | 3 _ .HTGPGVI Splice@chr  | 5.01E-12 | 1.60E-04 |
| 8Mar2011- | 4208  | 533.82  | 16.26677 | 2 K.TNIYTILTI chr5@1329  | 2.45E-10 | 0.003714 |
| 8Mar2011- | 8694  | 671.37  | -24.0361 | 2 T.FNIVHTQ Splice@chr   | 5.17E-10 | 0.009406 |
| 8Mar2011- | 16634 | 1024.85 | -1.80818 | 3 R.LPVENQ\ Splice@chr   | 3.75E-18 | 0        |
| 8Mar2011- | 10725 | 858.48  | 6.006088 | 3 _ .LETGIKPI Splice@chr | 2.09E-15 | 0        |
| 8Mar2011- | 13242 | 1167.55 | -25.3067 | 2 L.K+14.016 Splice@chr  | 4.85E-13 | 0        |
| 8Mar2011- | 9259  | 694.54  | 11.7794  | 5 _ .HTGPGVI Splice@chr  | 1.10E-10 | 0.001814 |
| 8Mar2011- | 8814  | 671.37  | -24.0361 | 2 T.FNIVHTQ Splice@chr   | 4.15E-10 | 0.007727 |
| 8Mar2011- | 401   | 439.91  | -1.85417 | 3 K.VAGSGSL chr5@1747    | 4.00E-10 | 0.007602 |
| 8Mar2011- | 8388  | 1106.62 | -21.4918 | 1 K.MTKNSAI chr2@1345    | 4.57E-10 | 0.008072 |
| 8Mar2011- | 17543 | 491.01  | -24.5182 | 4 K.TKENAIP\ chrX@8493   | 1.89E-10 | 0.002698 |
| 8Mar2011- | 4313  | 870.51  | 4.219085 | 1 K.IQKMPPF chrX@1229    | 4.77E-10 | 0.008442 |
| 8Mar2011- | 4317  | 534.32  | 13.11853 | 2 K.TNIYTILTI chr5@1329  | 2.23E-10 | 0.003201 |
| 8Mar2011- | 15460 | 805.47  | -13.7324 | 2 K.TPIFIPAP\ chr5@1861  | 3.38E-10 | 0.006376 |
| 8Mar2011- | 17333 | 491.01  | -24.5182 | 4 K.TKENAIP\ chrX@8493   | 2.57E-10 | 0.003966 |
| 8Mar2011- | 9836  | 1156.89 | 7.624255 | 3 _ .HTGPGVI Splice@chr  | 3.35E-12 | 1.60E-04 |
| 8Mar2011- | 7469  | 897.42  | -27.6753 | 3 _ .QVREMH Splice@chr   | 3.82E-10 | 0.007246 |
| 8Mar2011- | 9314  | 1156.9  | 16.3571  | 3 _ .HTGPGVI Splice@chr  | 2.38E-15 | 0        |
| 8Mar2011- | 16762 | 688.75  | 8.895763 | 5 R.FQSAAIG Splice@chr   | 1.02E-10 | 0.00168  |
| 8Mar2011- | 7457  | 886     | 3.172487 | 2 F.ENVVEVII Splice@chr  | 4.02E-13 | 0        |
| 8Mar2011- | 10627 | 1030.51 | 3.115089 | 2 L.SPIEVPC Splice@chr   | 5.94E-16 | 0        |
| 8Mar2011- | 7841  | 1075.06 | -6.79295 | 2 R.TCSK+14. chr2@1253   | 1.44E-10 | 0.002189 |
| 8Mar2011- | 10517 | 607     | -9.70672 | 3 I.NRFNISK chrX@1250    | 1.17E-10 | 0.001929 |
| 8Mar2011- | 14507 | 1003.19 | 17.13413 | 3 R.CWNRRA Splice@chr    | 2.07E-12 | 1.60E-04 |
| 8Mar2011- | 12653 | 542.49  | -13.2371 | 5 R.FLFIFSVI chr5@1400   | 5.06E-10 | 0.00906  |
| 8Mar2011- | 5919  | 725.88  | 19.33943 | 2 R.MEHLCRI Splice@chr   | 4.67E-11 | 8.66E-04 |
| 8Mar2011- | 17221 | 1175.12 | 6.371728 | 2 K.INWAVTI chr4@2890    | 7.96E-20 | 0        |
| 8Mar2011- | 17411 | 491.01  | -24.5182 | 4 K.TKENAIP\ chrX@8493   | 4.13E-10 | 0.007602 |
| 8Mar2011- | 4433  | 534.32  | 13.11853 | 2 K.TNIYTILTI chr5@1329  | 1.17E-10 | 0.001929 |
| 8Mar2011- | 10955 | 938.46  | 22.50833 | 2 R.ECSQSDS chr2@8876    | 2.11E-11 | 7.46E-04 |
| 8Mar2011- | 14802 | 895.78  | -1.06827 | 3 _ .RELTEEDI Splice@chr | 1.68E-11 | 3.15E-04 |
| 8Mar2011- | 2983  | 748.39  | -27.6021 | 2 K.QKSNWH chr5@1229     | 1.41E-10 | 0.002062 |
| 8Mar2011- | 10105 | 838.94  | -22.1914 | 2 R.QFADLPS chr5@1898    | 2.30E-10 | 0.00346  |
| 8Mar2011- | 14839 | 895.78  | -1.06827 | 3 _ .RELTEEDI Splice@chr | 2.94E-12 | 1.60E-04 |
| 8Mar2011- | 10292 | 702.98  | 26.58388 | 2 _ .FKFPRIK+ chr1@1071  | 7.59E-11 | 9.92E-04 |
| 8Mar2011- | 8390  | 827.77  | -14.6467 | 3 K.NNRKHTI chr5@2125    | 4.87E-10 | 0.00882  |

|           |       |         |          |                         |          |          |
|-----------|-------|---------|----------|-------------------------|----------|----------|
| 8Mar2011- | 7935  | 986.5   | -26.5069 | 2 K.KSKKSCA chr1@9876   | 4.37E-10 | 0.00796  |
| 8Mar2011- | 2771  | 741.39  | -17.2291 | 2 K.QKSNWH chr5@1229    | 1.21E-11 | 1.60E-04 |
| 8Mar2011- | 11582 | 563.86  | -24.1467 | 2 R.QNK+14. Splice@chr  | 3.58E-11 | 7.46E-04 |
| 8Mar2011- | 11500 | 826.48  | -13.7526 | 2 R.RVPLPEG Splice@chr  | 5.20E-14 | 0        |
| 8Mar2011- | 2901  | 787.43  | -1.78505 | 1 K.SDAAPAK chrX@8018   | 4.15E-10 | 0.007727 |
| 8Mar2011- | 11835 | 982     | 10.88823 | 2 R.TVMVQN Splice@chr   | 8.92E-18 | 0        |
| 8Mar2011- | 3822  | 693.87  | -6.6949  | 2 V.ICVAVGD chr5@1063   | 4.49E-10 | 0.008072 |
| 8Mar2011- | 15471 | 634.84  | 6.410455 | 2 R.VDIGDILF Splice@chr | 1.92E-12 | 0        |
| 8Mar2011- | 9688  | 870.48  | 7.030425 | 1 K.ATTQRHF chr2@6973   | 2.06E-10 | 0.002817 |
| 8Mar2011- | 15502 | 634.84  | 6.410455 | 2 R.VDIGDILF Splice@chr | 2.43E-13 | 0        |
| 8Mar2011- | 2681  | 741.39  | -17.2291 | 2 K.QKSNWH chr5@1229    | 1.42E-10 | 0.002189 |
| 8Mar2011- | 14453 | 895.78  | -1.06827 | 3 _RELTEEDI Splice@chr  | 1.67E-11 | 3.15E-04 |
| 8Mar2011- | 296   | 741.39  | -17.2291 | 2 K.QKSNWH chr5@1229    | 8.92E-11 | 0.00127  |
| 8Mar2011- | 2938  | 748.39  | -27.6021 | 2 K.QKSNWH chr5@1229    | 4.08E-11 | 8.66E-04 |
| 8Mar2011- | 2509  | 741.39  | -17.2291 | 2 K.QKSNWH chr5@1229    | 1.82E-11 | 7.46E-04 |
| 8Mar2011- | 16773 | 860.69  | 14.08015 | 4 R.FQSAAIG Splice@chr  | 1.06E-13 | 0        |
| 8Mar2011- | 2724  | 741.39  | -17.2291 | 2 K.QKSNWH chr5@1229    | 3.13E-11 | 7.46E-04 |
| 8Mar2011- | 5975  | 725.88  | 19.33943 | 2 R.MEHLCRI Splice@chr  | 9.09E-11 | 0.001405 |
| 8Mar2011- | 14404 | 895.78  | -1.06827 | 3 _RELTEEDI Splice@chr  | 3.21E-12 | 1.60E-04 |
| 8Mar2011- | 3032  | 787.43  | -1.78505 | 1 K.SDAAPAK chrX@8018   | 3.07E-10 | 0.005628 |
| 8Mar2011- | 10464 | 607     | -9.70672 | 3 I.NRFNISK chrX@1250   | 1.44E-10 | 0.002189 |
| 8Mar2011- | 12795 | 855.41  | -22.1447 | 2 _HVQEVAI Splice@chr   | 1.44E-10 | 0.002919 |
| 8Mar2011- | 12689 | 606.67  | -2.35139 | 3 I.NRFNISK chrX@1250   | 5.59E-11 | 9.08E-04 |
| 8Mar2011- | 10441 | 657.04  | -26.9179 | 3 R.GNVRK+1 chrX@7490   | 2.75E-10 | 0.006427 |
| 8Mar2011- | 10718 | 661.4   | -2.4954  | 2 K.LVLIAVN1 chr1@6528  | 2.25E-10 | 0.005322 |
| 8Mar2011- | 6823  | 533.82  | 16.26677 | 2 K.TNIYTILTI chr5@1329 | 1.82E-10 | 0.003721 |
| 8Mar2011- | 5646  | 626.3   | -9.76097 | 2 R.LCESGAA Splice@chr  | 3.51E-16 | 0        |
| 8Mar2011- | 19180 | 860.69  | 14.08015 | 4 R.FQSAAIG Splice@chr  | 3.47E-13 | 0        |
| 8Mar2011- | 3828  | 447.74  | -24.0456 | 2 K.IIYDGSVK chrX@2516  | 3.07E-10 | 0.006977 |
| 8Mar2011- | 17125 | 1007.86 | 15.19559 | 3 R.CWNRRA Splice@chr   | 3.47E-12 | 0        |
| 8Mar2011- | 692   | 425.22  | -10.657  | 2 K.HLNEHAK chr5@5137   | 4.14E-10 | 0.009731 |
| 8Mar2011- | 10729 | 835.96  | 1.354454 | 2 _NDHKIIVI chrX@8533   | 1.82E-10 | 0.003721 |
| 8Mar2011- | 2504  | 915.47  | 1.201399 | 1 K.FHEIGGQ chrX@4727   | 3.20E-11 | 5.36E-04 |
| 8Mar2011- | 12953 | 858.48  | 6.006088 | 3 _LETGIKPI Splice@chr  | 4.61E-14 | 0        |
| 8Mar2011- | 11931 | 762.93  | 7.897192 | 2 K.CSKNSQII chr5@3746  | 2.17E-10 | 0.005106 |
| 8Mar2011- | 19934 | 1092.55 | -17.3338 | 1 R.NISEIFNN chr2@4110  | 3.65E-10 | 0.008411 |
| 8Mar2011- | 2803  | 557.84  | 24.08391 | 2 R.EVIKHFN1 chrX@9231  | 4.11E-10 | 0.009731 |
| 8Mar2011- | 14232 | 888.47  | 22.8338  | 2 K.DITLEVEA Splice@chr | 1.24E-12 | 0        |
| 8Mar2011- | 16760 | 895.78  | -1.06827 | 3 _RELTEEDI Splice@chr  | 3.42E-11 | 5.36E-04 |
| 8Mar2011- | 17814 | 805.97  | -15.8175 | 2 K.TPIFIPAP1 chr5@1861 | 3.03E-10 | 0.006749 |
| 8Mar2011- | 5143  | 741.39  | -17.2291 | 2 K.QKSNWH chr5@1229    | 3.75E-11 | 7.81E-04 |
| 8Mar2011- | 5911  | 443.24  | -2.94433 | 3 _TASPEAG chr2@1419    | 4.05E-10 | 0.009397 |
| 8Mar2011- | 17832 | 634.84  | 6.410455 | 2 R.VDIGDILF Splice@chr | 7.51E-13 | 0        |
| 8Mar2011- | 11017 | 671.37  | -24.0361 | 2 T.FNIVHTQ Splice@chr  | 1.90E-10 | 0.004069 |
| 8Mar2011- | 12804 | 1030.52 | 12.84278 | 2 L.SPIPEVPC Splice@chr | 3.02E-15 | 0        |
| 8Mar2011- | 5507  | 741.39  | -17.2291 | 2 K.QKSNWH chr5@1229    | 1.89E-11 | 5.36E-04 |
| 8Mar2011- | 13397 | 660.39  | 19.06858 | 2 _IM+15.99 chr2@1701   | 2.90E-10 | 0.006643 |

|           |       |         |          |                          |          |          |
|-----------|-------|---------|----------|--------------------------|----------|----------|
| 8Mar2011- | 17880 | 634.84  | 6.410455 | 2 R.VDIGDILF Splice@chr  | 1.46E-12 | 0        |
| 8Mar2011- | 5090  | 741.39  | -17.2291 | 2 K.QKSNWH chr5@1229     | 2.70E-11 | 5.36E-04 |
| 8Mar2011- | 14058 | 819.44  | -25.929  | 2 R.M+15.99 chrX@7275    | 2.47E-10 | 0.00578  |
| 8Mar2011- | 12275 | 726.9   | -25.703  | 2 K.TLFLKYN1 chr4@5575   | 2.57E-10 | 0.006113 |
| 8Mar2011- | 6818  | 895.51  | -6.04083 | 2 _._SGISIEVN Splice@chr | 1.60E-10 | 0.003265 |
| 8Mar2011- | 3731  | 634.87  | 13.67349 | 2 R.IQKCHTLI Splice@chr  | 1.33E-10 | 0.002919 |
| 8Mar2011- | 15688 | 854.82  | 15.56718 | 3 A.EITEMLPi Splice@chr  | 1.93E-11 | 5.36E-04 |
| 8Mar2011- | 6384  | 693.87  | -6.6949  | 2 V.ICVAVGD chr5@1065    | 3.17E-10 | 0.007077 |
| 8Mar2011- | 13826 | 965.77  | 16.46969 | 4 R.KTSSCQK chr5@2085    | 4.31E-10 | 0.009818 |
| 8Mar2011- | 17109 | 895.78  | -1.06827 | 3 _._RELTEEDI Splice@chr | 1.22E-12 | 0        |
| 8Mar2011- | 15205 | 669.35  | -28.2834 | 2 K.LEFNISKI chr1@1931   | 8.13E-12 | 1.48E-04 |
| 8Mar2011- | 2556  | 915.47  | 1.201399 | 1 K.FHEIGGQ chrX@4727    | 3.24E-11 | 5.36E-04 |
| 8Mar2011- | 12743 | 606.67  | -2.35139 | 3 I.NRFNISK chrX@1250    | 1.11E-10 | 0.00248  |
| 8Mar2011- | 17502 | 918.45  | 1.886417 | 3 K.M+15.99 chr5@1445    | 2.81E-10 | 0.006427 |
| 8Mar2011- | 5205  | 741.39  | -17.2291 | 2 K.QKSNWH chr5@1229     | 6.14E-11 | 0.00103  |
| 8Mar2011- | 8003  | 763.41  | -0.5193  | 2 F.TK+14.01 chr3@1310   | 3.94E-10 | 0.00917  |
| 8Mar2011- | 295   | 422.27  | 2.173301 | 2 K.IGKGEVLI chrX@1204   | 1.07E-10 | 0.001991 |
| 8Mar2011- | 9707  | 886     | 3.172487 | 2 F.ENVEVII Splice@chr   | 5.70E-12 | 1.48E-04 |
| 8Mar2011- | 5397  | 741.39  | -17.2291 | 2 K.QKSNWH chr5@1229     | 6.71E-12 | 1.48E-04 |
| 8Mar2011- | 12287 | 838.94  | -22.1914 | 2 R.QFADLPS chr5@1898    | 3.83E-10 | 0.008852 |
| 8Mar2011- | 13011 | 858.48  | 6.006088 | 3 _._LETGIKPi Splice@chr | 6.44E-14 | 0        |
| 8Mar2011- | 10553 | 656.35  | -16.915  | 2 K.FINFSNN' Splice@chr  | 3.47E-10 | 0.007856 |
| 8Mar2011- | 11880 | 870.48  | 7.030425 | 1 K.ATTQRHF chr2@6975    | 4.01E-10 | 0.00917  |
| 8Mar2011- | 5042  | 741.39  | -17.2291 | 2 K.QKSNWH chr5@1229     | 5.71E-11 | 0.00103  |
| 8Mar2011- | 3887  | 439.91  | 17.33685 | 3 K.NSQKNPI chr2@3540    | 1.89E-10 | 0.004069 |
| 8Mar2011- | 4058  | 524.79  | 0.17701  | 2 R.NSSLGVI Splice@chr   | 3.30E-10 | 0.007528 |
| 8Mar2011- | 16405 | 746.91  | 13.99266 | 2 V.EK+14.01 chrX@6709   | 3.83E-11 | 7.81E-04 |
| 8Mar2011- | 10062 | 1075.06 | -6.79295 | 2 R.TCSK+14. chr2@1255   | 2.80E-10 | 0.006427 |
| 8Mar2011- | 5451  | 741.39  | -17.2291 | 2 K.QKSNWH chr5@1229     | 2.20E-11 | 5.36E-04 |
| 8Mar2011- | 13075 | 858.48  | 6.006088 | 3 _._LETGIKPi Splice@chr | 4.77E-11 | 7.81E-04 |
| 8Mar2011- | 16644 | 987.51  | 4.289691 | 3 K.KYLFLDNI chr4@1288   | 7.09E-11 | 0.001385 |
| 8Mar2011- | 10739 | 933.4   | -28.0819 | 2 S.SPEVPEN Splice@chr   | 2.41E-11 | 5.36E-04 |
| 8Mar2011- | 10113 | 1075.06 | -6.79295 | 2 R.TCSK+14. chr2@1255   | 2.57E-10 | 0.006113 |
| 8Mar2011- | 2783  | 539.33  | -21.5032 | 2 _._LITLAAAL chr5@2205  | 1.19E-10 | 0.002714 |
| 8Mar2011- | 3784  | 634.87  | 13.67349 | 2 R.IQKCHTLI Splice@chr  | 7.17E-11 | 0.001385 |
| 8Mar2011- | 16327 | 1060.54 | -6.74128 | 3 K.SGTIFDNI Splice@chr  | 9.01E-13 | 0        |
| 8Mar2011- | 12463 | 861.65  | -28.5692 | 4 A.QRQYM+ Splice@chr    | 1.47E-11 | 3.20E-04 |
| 8Mar2011- | 17226 | 920.51  | 3.584451 | 2 K.K+14.016 chr1@1372   | 2.17E-11 | 4.66E-04 |
| 8Mar2011- | 11519 | 756.73  | -22.0569 | 3 L.FENLMSE chr2@3448    | 2.01E-10 | 0.005844 |
| 8Mar2011- | 11853 | 981.99  | 0.684403 | 2 R.TVMVQN Splice@chr    | 1.21E-20 | 0        |
| 8Mar2011- | 16585 | 688.04  | 26.06008 | 3 R.MIFSLDP chrX@6055    | 2.97E-10 | 0.007861 |
| 8Mar2011- | 15845 | 795.66  | -2.97654 | 4 K.SGTIFDNI Splice@chr  | 3.89E-16 | 0        |
| 8Mar2011- | 2572  | 741.39  | -17.2291 | 2 K.QKSNWH chr5@1229     | 2.26E-11 | 4.66E-04 |
| 8Mar2011- | 16650 | 1147.25 | 13.44098 | 3 R.FQSAAIG Splice@chr   | 3.27E-15 | 0        |
| 8Mar2011- | 12930 | 669.35  | -28.2834 | 2 K.LEFNISKI chr1@1931   | 3.82E-11 | 0.001053 |
| 8Mar2011- | 13844 | 867.97  | -15.4176 | 2 L.FLWSK+1 chr2@1462    | 2.82E-10 | 0.007476 |
| 8Mar2011- | 15358 | 805.47  | -13.7324 | 2 K.TPIFIPAPi chr5@1861  | 3.42E-10 | 0.009131 |

|           |       |         |          |                          |          |          |
|-----------|-------|---------|----------|--------------------------|----------|----------|
| 8Mar2011- | 10812 | 858.48  | 6.006088 | 3 _..LETGIKPI Splice@chr | 1.20E-12 | 0        |
| 8Mar2011- | 15880 | 1060.54 | -6.74128 | 3 K.SGTIFDNI Splice@chr  | 2.76E-15 | 0        |
| 8Mar2011- | 11061 | 938.46  | 22.50833 | 2 R.ECSQSDS chr2@8876    | 3.53E-10 | 0.009258 |
| 8Mar2011- | 9304  | 881.92  | -2.80647 | 2 F.LQEQGTY Splice@chr   | 5.47E-12 | 0        |
| 8Mar2011- | 3079  | 626.3   | -9.76097 | 2 R.LCESGAA Splice@chr   | 4.54E-16 | 0        |
| 8Mar2011- | 5422  | 724.35  | 19.12636 | 3 V.CLTEEGK Splice@chr   | 2.35E-11 | 4.66E-04 |
| 8Mar2011- | 2518  | 741.39  | -17.2291 | 2 K.QKSNWH chr5@1229     | 2.68E-11 | 9.18E-04 |
| 8Mar2011- | 16223 | 777.08  | 13.6322  | 3 Q.EPVEDGI Splice@chr   | 1.02E-11 | 1.65E-04 |
| 8Mar2011- | 15904 | 795.66  | -2.97654 | 4 K.SGTIFDNI Splice@chr  | 4.79E-14 | 0        |
| 8Mar2011- | 2493  | 501.25  | -20.6805 | 2 _..QNGNVQ Splice@chr   | 1.15E-11 | 3.20E-04 |
| 8Mar2011- | 2535  | 579.32  | 24.77313 | 2 _..YLQHPIET Splice@chr | 1.12E-10 | 0.003924 |
| 8Mar2011- | 15762 | 1060.54 | -6.74128 | 3 K.SGTIFDNI Splice@chr  | 3.99E-13 | 0        |
| 8Mar2011- | 15384 | 634.84  | 6.410455 | 2 R.VDIGDILF Splice@chr  | 1.57E-12 | 0        |
| 8Mar2011- | 2256  | 741.39  | -17.2291 | 2 K.QKSNWH chr5@1229     | 7.99E-11 | 0.002873 |
| 8Mar2011- | 3358  | 716.4   | 8.019867 | 1 K.LAANAEK chr5@1339    | 2.50E-10 | 0.007132 |
| 8Mar2011- | 15420 | 634.84  | 6.410455 | 2 R.VDIGDILF Splice@chr  | 7.75E-13 | 0        |
| 8Mar2011- | 16033 | 1159.62 | 2.451592 | 2 I.K+14.016` chrX@7012  | 2.61E-10 | 0.007359 |
| 8Mar2011- | 2674  | 741.39  | -17.2291 | 2 K.QKSNWH chr5@1229     | 5.85E-11 | 0.002196 |
| 8Mar2011- | 16317 | 795.66  | -2.97654 | 4 K.SGTIFDNI Splice@chr  | 1.11E-13 | 0        |
| 8Mar2011- | 11489 | 1153.23 | -17.5731 | 3 F.EGIRTGG Splice@chr   | 6.02E-14 | 0        |
| 8Mar2011- | 4622  | 460.25  | -17.4268 | 2 K.YPGIGGI Splice@chr   | 7.47E-11 | 0.002739 |
| 8Mar2011- | 3297  | 748.39  | -27.6021 | 2 K.QKSNWH chr5@1229     | 2.60E-11 | 9.18E-04 |
| 8Mar2011- | 2626  | 741.39  | -17.2291 | 2 K.QKSNWH chr5@1229     | 9.05E-11 | 0.003137 |
| 8Mar2011- | 11550 | 1153.23 | -17.5731 | 3 F.EGIRTGG Splice@chr   | 2.45E-12 | 0        |
| 8Mar2011- | 17113 | 783.75  | 7.307848 | 3 K.INWAVTI chr4@2890    | 1.67E-14 | 0        |
| 8Mar2011- | 2357  | 741.39  | -17.2291 | 2 K.QKSNWH chr5@1229     | 4.35E-11 | 0.001198 |
| 8Mar2011- | 17109 | 1175.12 | 6.371728 | 2 K.INWAVTI chr4@2890    | 4.43E-22 | 0        |
| 8Mar2011- | 15850 | 1060.54 | -6.74128 | 3 K.SGTIFDNI Splice@chr  | 1.85E-13 | 0        |
| 8Mar2011- | 16627 | 1147.25 | 13.44098 | 3 R.FQSAAIG Splice@chr   | 6.19E-13 | 0        |
| 8Mar2011- | 15873 | 795.66  | -10.8901 | 4 K.SGTIFDNI Splice@chr  | 7.70E-15 | 0        |
| 8Mar2011- | 8306  | 657.04  | -26.9179 | 3 R.GNVRK+1 chrX@7490    | 1.73E-10 | 0.005336 |
| 8Mar2011- | 2303  | 741.39  | -17.2291 | 2 K.QKSNWH chr5@1229     | 4.66E-11 | 0.001482 |
| 8Mar2011- | 2440  | 501.25  | -20.6805 | 2 _..QNGNVQ Splice@chr   | 7.13E-11 | 0.002607 |
| 8Mar2011- | 10688 | 855.41  | -22.1447 | 2 _..HVQEVAI Splice@chr  | 5.26E-11 | 0.001769 |
| 8Mar2011- | 12847 | 848.97  | 0.791766 | 2 R.LLELAPT chr2@6685    | 2.05E-15 | 0        |
| 8Mar2011- | 2463  | 741.39  | -17.2291 | 2 K.QKSNWH chr5@1229     | 2.90E-11 | 9.18E-04 |
| 8Mar2011- | 9347  | 484.31  | 18.81723 | 2 K.ILIATTHA chr3@2129   | 2.01E-10 | 0.005844 |
| 8Mar2011- | 15913 | 1060.54 | -6.74128 | 3 K.SGTIFDNI Splice@chr  | 3.34E-14 | 0        |
| 8Mar2011- | 10369 | 476.51  | -14.5686 | 4 K.FSVQLDV Splice@chr   | 4.31E-12 | 0        |
| 8Mar2011- | 10312 | 476.76  | -16.3324 | 4 K.FSVQLDV Splice@chr   | 5.93E-14 | 0        |
| 8Mar2011- | 14244 | 987.5   | -5.85708 | 3 K.KYLFLDNI chr4@1288   | 6.58E-11 | 0.002467 |
| 8Mar2011- | 9356  | 881.92  | -2.80647 | 2 F.LQEQGTY Splice@chr   | 9.98E-12 | 1.65E-04 |
| 8Mar2011- | 2408  | 741.39  | -17.2291 | 2 K.QKSNWH chr5@1229     | 5.28E-11 | 0.001769 |
| 8Mar2011- | 12210 | 602.99  | -24.0627 | 3 _..QVETILFI chr3@1065  | 1.96E-10 | 0.005586 |
| 8Mar2011- | 4406  | 533.82  | 16.26677 | 2 K.TNIYTILTI chr5@1329  | 2.01E-10 | 0.005844 |
| 8Mar2011- | 12741 | 835.45  | -7.2977  | 4 R.K+14.016 chrX@9996   | 1.34E-10 | 0.004041 |
| 8Mar2011- | 2733  | 741.39  | -17.2291 | 2 K.QKSNWH chr5@1229     | 5.29E-11 | 0.001916 |

|           |       |         |          |                         |          |          |
|-----------|-------|---------|----------|-------------------------|----------|----------|
| 8Mar2011- | 7873  | 694.39  | 25.0635  | 2 K.NVISSLQI chr2@5301  | 1.72E-10 | 0.005336 |
| 8Mar2011- | 3105  | 787.43  | -1.78505 | 1 K.SDAAPAK chrX@8018   | 1.79E-11 | 4.66E-04 |
| 8Mar2011- | 10871 | 858.48  | 6.006088 | 3 _LETGIKPI Splice@chr  | 1.57E-14 | 0        |
| 8Mar2011- | 4319  | 895.51  | -6.04083 | 2 _SGISIEVN Splice@chr  | 1.34E-10 | 0.004177 |
| 8Mar2011- | 16343 | 795.66  | -2.97654 | 4 K.SGTIFDNI Splice@chr | 1.04E-14 | 0        |
| 8Mar2011- | 15374 | 1150.1  | 1.940518 | 2 K.IDKYTLM chr2@1049   | 1.48E-10 | 0.004427 |
| 8Mar2011- | 10587 | 606.67  | -2.35139 | 3 I.NRFNISK chrX@1250   | 1.11E-10 | 0.003808 |
| 8Mar2011- | 16637 | 688.75  | 8.895763 | 5 R.FQSAAIG Splice@chr  | 5.13E-12 | 0        |
| 8Mar2011- | 15925 | 1043.51 | 17.99356 | 1 R.SLGLYSDI chr5@4466  | 3.19E-10 | 0.009646 |
| 8Mar2011- | 18271 | 1070.1  | -23.1783 | 2 K.FWREVC1 chr5@1859   | 1.87E-10 | 0.006378 |
| 8Mar2011- | 5695  | 626.8   | -12.4435 | 2 R.LCESGAA Splice@chr  | 3.89E-16 | 0        |
| 8Mar2011- | 18915 | 783.75  | 7.307848 | 3 K.INWAVTI chr4@2890   | 2.71E-14 | 0        |
| 8Mar2011- | 17187 | 934.48  | 16.93502 | 2 R.QFRQSGI chr5@4795   | 1.54E-10 | 0.004651 |
| 8Mar2011- | 17517 | 975.81  | -5.15613 | 3 K.SGTIFDNI Splice@chr | 7.12E-11 | 0.002173 |
| 8Mar2011- | 18600 | 688.75  | 8.895763 | 5 R.FQSAAIG Splice@chr  | 5.70E-11 | 0.00205  |
| 8Mar2011- | 12857 | 858.48  | 6.006088 | 3 _LETGIKPI Splice@chr  | 8.74E-14 | 0        |
| 8Mar2011- | 12580 | 606.67  | -2.35139 | 3 I.NRFNISK chrX@1250   | 7.47E-11 | 0.002173 |
| 8Mar2011- | 7362  | 1025.62 | -1.90621 | 1 K.LGLGSGI chr5@4945   | 4.06E-11 | 0.00155  |
| 8Mar2011- | 2413  | 915.47  | 1.201399 | 1 K.FHEIGGQ chrX@4727   | 1.03E-10 | 0.002797 |
| 8Mar2011- | 16003 | 940.45  | -9.06687 | 2 L.K+14.016 chr3@1105  | 1.21E-10 | 0.003792 |
| 8Mar2011- | 17353 | 805.47  | -13.7324 | 2 K.TPIFIPAP1 chr5@1861 | 2.67E-11 | 7.28E-04 |
| 8Mar2011- | 2469  | 915.47  | 1.201399 | 1 K.FHEIGGQ chrX@4727   | 3.20E-11 | 0.001008 |
| 8Mar2011- | 15546 | 892.98  | 18.61254 | 2 R.M+15.99 chr2@1001   | 2.37E-10 | 0.007301 |
| 8Mar2011- | 16506 | 886.99  | -27.5552 | 2 _NFRQIGIL chr5@3054   | 3.08E-10 | 0.009646 |
| 8Mar2011- | 7303  | 1025.62 | -1.90621 | 1 K.LGLGSGI chr5@4945   | 5.37E-11 | 0.001813 |
| 8Mar2011- | 8087  | 724.35  | 19.12636 | 3 V.CLTEEGK Splice@chr  | 2.22E-10 | 0.007301 |
| 8Mar2011- | 13756 | 965.77  | 16.46969 | 4 R.KTSSCQK chr5@2085   | 1.15E-10 | 0.003792 |
| 8Mar2011- | 13795 | 982     | 10.88823 | 2 R.TVMVQN Splice@chr   | 2.34E-18 | 0        |
| 8Mar2011- | 14915 | 848.97  | 0.791766 | 2 R.LLELAPT1 chr2@6685  | 4.72E-17 | 0        |
| 8Mar2011- | 13850 | 982     | 10.88823 | 2 R.TVMVQN Splice@chr   | 5.19E-15 | 0        |
| 8Mar2011- | 7824  | 724.35  | 19.12636 | 3 V.CLTEEGK Splice@chr  | 4.26E-11 | 0.00155  |
| 8Mar2011- | 11441 | 881.92  | -2.80647 | 2 F.LQEQGTY Splice@chr  | 2.05E-11 | 5.93E-04 |
| 8Mar2011- | 14939 | 669.35  | -28.2834 | 2 K.LEFNISK1 chr1@1931  | 1.49E-11 | 5.93E-04 |
| 8Mar2011- | 12710 | 855.91  | -24.1079 | 2 _HVQEVAI Splice@chr   | 2.98E-14 | 0        |
| 8Mar2011- | 11388 | 881.92  | -2.80647 | 2 F.LQEQGTY Splice@chr  | 2.68E-11 | 7.28E-04 |
| 8Mar2011- | 12421 | 511.63  | 3.665629 | 3 R.EIPVSLVC Splice@chr | 1.24E-10 | 0.003792 |
| 8Mar2011- | 6762  | 895.51  | -6.04083 | 2 _SGISIEVN Splice@chr  | 2.32E-10 | 0.007301 |
| 8Mar2011- | 16180 | 665.37  | -26.6417 | 2 Q.INNK+14 Splice@chr  | 2.39E-10 | 0.007424 |
| 8Mar2011- | 9796  | 886     | 3.172487 | 2 F.ENVEVII Splice@chr  | 4.68E-12 | 0        |
| 8Mar2011- | 16494 | 1003.19 | 17.13413 | 3 R.CWNRRA Splice@chr   | 9.73E-12 | 1.57E-04 |
| 8Mar2011- | 17285 | 965.04  | -7.09093 | 2 F.FLRQIRQI chr4@3226  | 3.67E-11 | 0.001422 |
| 8Mar2011- | 12798 | 858.48  | 6.006088 | 3 _LETGIKPI Splice@chr  | 4.61E-13 | 0        |
| 8Mar2011- | 16948 | 1172.62 | -6.98068 | 2 K.YLGAYLL1 Splice@chr | 6.70E-11 | 0.00205  |
| 8Mar2011- | 3002  | 409.22  | -18.6349 | 2 R.AGGGTAI chr2@7665   | 3.17E-10 | 0.009646 |
| 8Mar2011- | 16289 | 987.51  | 4.289691 | 3 K.KYLFLDNI chr4@1288  | 2.15E-10 | 0.007094 |
| 8Mar2011- | 5471  | 741.39  | -17.2291 | 2 K.QKSNWH chr5@1229    | 1.50E-11 | 5.93E-04 |
| 8Mar2011- | 17836 | 1060.55 | 2.708983 | 3 K.SGTIFDNI Splice@chr | 1.16E-12 | 0        |

|           |       |         |          |                          |          |          |
|-----------|-------|---------|----------|--------------------------|----------|----------|
| 8Mar2011- | 5584  | 626.3   | -9.76097 | 2 R.LCESGAA Splice@chr   | 5.14E-16 | 0        |
| 8Mar2011- | 17381 | 634.84  | 6.410455 | 2 R.VDIGDILF Splice@chr  | 2.14E-12 | 0        |
| 8Mar2011- | 13520 | 1153.23 | -17.5731 | 3 F.EGIRTTGG' Splice@chr | 6.83E-13 | 0        |
| 8Mar2011- | 17874 | 1060.54 | -6.74128 | 3 K.SGTIFDNI Splice@chr  | 7.05E-14 | 0        |
| 8Mar2011- | 9663  | 663.85  | -5.06443 | 2 N.KMIFSMI chr4@862     | 2.94E-10 | 0.00931  |
| 8Mar2011- | 5122  | 741.39  | -17.2291 | 2 K.QKSNWH chr5@122      | 2.59E-11 | 7.28E-04 |
| 8Mar2011- | 16056 | 940.45  | -9.06687 | 2 L.K+14.016 chr3@110    | 1.65E-10 | 0.005281 |
| 8Mar2011- | 1994  | 506.78  | 5.370163 | 2 __.VDKNVYF chr4@119    | 1.41E-10 | 0.00429  |
| 8Mar2011- | 9517  | 570.3   | 13.18729 | 2 K.M+15.99 Splice@chr   | 1.34E-10 | 0.004163 |
| 8Mar2011- | 18798 | 828.39  | -8.00743 | 2 K.PNLK+14 chr2@386     | 9.72E-11 | 0.002797 |
| 8Mar2011- | 5417  | 741.39  | -17.2291 | 2 K.QKSNWH chr5@122      | 3.24E-11 | 0.001008 |
| 8Mar2011- | 18343 | 795.66  | -2.97654 | 4 K.SGTIFDNI Splice@chr  | 6.98E-12 | 1.57E-04 |
| 8Mar2011- | 5180  | 741.39  | -17.2291 | 2 K.QKSNWH chr5@122      | 4.34E-11 | 0.00155  |
| 8Mar2011- | 13121 | 780.03  | -24.5321 | 3 ?.AQDNYM Splice@chr    | 3.11E-11 | 0.001008 |
| 8Mar2011- | 15706 | 890.94  | -8.84726 | 2 R.ITPPNRQ Splice@chr   | 7.93E-11 | 0.0023   |
| 8Mar2011- | 2365  | 915.47  | 1.201399 | 1 K.FHEIGGQ chrX@472     | 3.24E-11 | 0.001008 |
| 8Mar2011- | 16803 | 1007.86 | 15.19559 | 3 R.CWNRRA Splice@chr    | 1.32E-11 | 4.61E-04 |
| 8Mar2011- | 15134 | 806.43  | -23.7823 | 4 K.EKKLKQK chr1@548     | 1.16E-10 | 0.003792 |
| 8Mar2011- | 17408 | 685.71  | -3.06095 | 3 K.YPVYSK+ chr3@520     | 2.97E-10 | 0.00931  |
| 8Mar2011- | 15303 | 937     | -18.3647 | 2 R.NPFLEEV chr3@109     | 5.67E-12 | 1.57E-04 |
| 8Mar2011- | 13458 | 1153.23 | -17.5731 | 3 F.EGIRTTGG' Splice@chr | 8.63E-14 | 0        |
| 8Mar2011- | 5067  | 741.39  | -17.2291 | 2 K.QKSNWH chr5@122      | 4.01E-11 | 0.00155  |
| 8Mar2011- | 5762  | 748.4   | -14.2094 | 2 K.QKSNWH chr5@122      | 9.04E-12 | 1.57E-04 |
| 8Mar2011- | 17865 | 795.66  | -2.97654 | 4 K.SGTIFDNI Splice@chr  | 4.69E-16 | 0        |
| 8Mar2011- | 12254 | 944.96  | -18.9448 | 2 __.ILCSTDVS Splice@chr | 2.47E-11 | 7.28E-04 |
| 8Mar2011- | 13605 | 983.97  | 4.629411 | 2 R.SFSTIPDS chr2@130    | 1.91E-20 | 0        |
| 8Mar2011- | 15910 | 895.78  | -1.06827 | 3 __.RELTEEDI Splice@chr | 2.18E-11 | 0.001083 |
| 8Mar2011- | 17219 | 777.08  | 13.6322  | 3 Q.EPVEDGI Splice@chr   | 3.53E-12 | 0        |
| 8Mar2011- | 16601 | 805.47  | -13.7324 | 2 K.TPIFIPAP chr5@186    | 1.92E-10 | 0.008354 |
| 8Mar2011- | 16600 | 634.84  | 6.410455 | 2 R.VDIGDILF Splice@chr  | 8.40E-12 | 2.27E-04 |
| 8Mar2011- | 11957 | 801.71  | 5.720343 | 3 K.FFKPNTD chr5@752     | 2.70E-17 | 0        |
| 8Mar2011- | 5053  | 741.39  | -17.2291 | 2 K.QKSNWH chr5@122      | 2.08E-11 | 0.001083 |
| 8Mar2011- | 2929  | 692.34  | -2.47201 | 2 K.TAEHVEC Splice@chr   | 6.53E-14 | 0        |
| 8Mar2011- | 16227 | 589.8   | 27.78209 | 2 K.K+14.016 chr5@123    | 2.21E-10 | 0.009968 |
| 8Mar2011- | 13671 | 888.46  | 11.62323 | 2 K.DITLEVEA Splice@chr  | 1.98E-12 | 0        |
| 8Mar2011- | 6330  | 693.87  | -6.6949  | 2 V.ICVAVGD chr5@106     | 6.94E-12 | 0        |
| 8Mar2011- | 4081  | 720.83  | 6.444233 | 2 K.CVEDYRD chr5@752     | 2.40E-11 | 0.001285 |
| 8Mar2011- | 15827 | 1003.19 | 17.13413 | 3 R.CWNRRA Splice@chr    | 1.66E-11 | 6.62E-04 |
| 8Mar2011- | 8928  | 509.3   | -20.473  | 2 R.SSVIMLIV chr2@576    | 9.85E-11 | 0.005348 |
| 8Mar2011- | 17850 | 1175.12 | 6.371728 | 2 K.INWAVTI chr4@289     | 4.40E-24 | 0        |
| 8Mar2011- | 17849 | 783.75  | 7.307848 | 3 K.INWAVTI chr4@289     | 1.17E-16 | 0        |
| 8Mar2011- | 2883  | 692.34  | -2.47201 | 2 K.TAEHVEC Splice@chr   | 1.76E-12 | 0        |
| 8Mar2011- | 15737 | 895.78  | -1.06827 | 3 __.RELTEEDI Splice@chr | 3.88E-11 | 0.001471 |
| 8Mar2011- | 13206 | 1153.23 | -17.5731 | 3 F.EGIRTTGG' Splice@chr | 5.24E-13 | 0        |
| 8Mar2011- | 5262  | 935.55  | 7.651866 | 1 __.QVVTKT chr1@678     | 1.51E-11 | 6.62E-04 |
| 8Mar2011- | 16017 | 895.78  | -1.06827 | 3 __.RELTEEDI Splice@chr | 1.48E-12 | 0        |
| 8Mar2011- | 11323 | 748.73  | -12.625  | 3 R.LPSKENL chr4@563     | 1.39E-10 | 0.005616 |

|           |       |         |          |                         |          |          |
|-----------|-------|---------|----------|-------------------------|----------|----------|
| 8Mar2011- | 8872  | 1017.59 | -22.5744 | 1 R.SSVIMLIV chr2@5767  | 8.82E-11 | 0.004586 |
| 8Mar2011- | 13445 | 965.77  | 16.46969 | 4 R.KTSSCQK chr5@2085   | 1.14E-10 | 0.0055   |
| 8Mar2011- | 2005  | 452.23  | -1.48793 | 2 R.SGEPLSA: Splice@chr | 3.28E-11 | 0.001471 |
| 8Mar2011- | 2052  | 452.23  | -1.48793 | 2 R.SGEPLSA: Splice@chr | 5.11E-11 | 0.002675 |
| 8Mar2011- | 1064  | 801.46  | -26.9469 | 1 K.WAGVVL chr4@3669    | 8.18E-11 | 0.004004 |
| 8Mar2011- | 5769  | 748.39  | -27.6021 | 2 K.QKSNWH chr5@1229    | 1.97E-11 | 0.001083 |
| 8Mar2011- | 406   | 748.36  | 16.41564 | 1 R.ATAGDGI chr3@5845   | 3.04E-12 | 0        |
| 8Mar2011- | 13402 | 737.35  | -6.11443 | 4 R.NAEAAAT Splice@chr  | 9.23E-20 | 0        |
| 8Mar2011- | 2098  | 452.23  | -1.48793 | 2 R.SGEPLSA: Splice@chr | 2.85E-11 | 0.001285 |
| 8Mar2011- | 10697 | 671.37  | -24.0361 | 2 T.FNIVHTQ Splice@chr  | 2.17E-10 | 0.009968 |
| 8Mar2011- | 15733 | 1104.83 | 4.296498 | 3 S.EDLGSDA Splice@chr  | 9.12E-22 | 0        |
| 8Mar2011- | 1474  | 756.39  | 1.131206 | 2 K.KTAEHVE chr5@1002   | 1.32E-14 | 0        |
| 8Mar2011- | 2188  | 452.23  | -1.48793 | 2 R.SGEPLSA: Splice@chr | 4.66E-11 | 0.002289 |
| 8Mar2011- | 17231 | 777.08  | 13.6322  | 3 Q.EPVEDGI Splice@chr  | 6.34E-12 | 0        |
| 8Mar2011- | 2139  | 452.23  | -1.48793 | 2 R.SGEPLSA: Splice@chr | 1.43E-10 | 0.005805 |
| 8Mar2011- | 16047 | 895.78  | -1.06827 | 3 _RELTEEDI Splice@chr  | 1.29E-11 | 4.51E-04 |
| 8Mar2011- | 17253 | 777.08  | 13.6322  | 3 Q.EPVEDGI Splice@chr  | 1.98E-11 | 0.001083 |
| 8Mar2011- | 8881  | 509.3   | -20.473  | 2 R.SSVIMLIV chr2@5767  | 3.84E-11 | 0.001471 |
| 8Mar2011- | 17533 | 1147.25 | 13.44098 | 3 R.FQSAAIG Splice@chr  | 7.82E-15 | 0        |
| 8Mar2011- | 12005 | 801.71  | 5.720343 | 3 K.FFKPNTD chr5@7527   | 5.37E-17 | 0        |
| 8Mar2011- | 11388 | 881.47  | 19.52679 | 2 A.HRK+14.( chr5@1438  | 1.44E-10 | 0.005805 |
| 8Mar2011- | 8781  | 1017.59 | -22.5744 | 1 R.SSVIMLIV chr2@5767  | 3.76E-11 | 0.001471 |
| 8Mar2011- | 5573  | 979.49  | 11.24178 | 1 _NLQNGN chr2@1080     | 5.29E-11 | 0.002675 |
| 8Mar2011- | 2239  | 452.23  | -1.48793 | 2 R.SGEPLSA: Splice@chr | 1.06E-10 | 0.0055   |
| 8Mar2011- | 14500 | 766.09  | -0.93019 | 3 R.CLSENILS chr3@5861  | 1.73E-10 | 0.007842 |
| 8Mar2011- | 12598 | 806.38  | 3.362099 | 3 K.FFKPNTD chr5@7527   | 2.95E-16 | 0        |
| 8Mar2011- | 15703 | 895.78  | -1.06827 | 3 _RELTEEDI Splice@chr  | 2.63E-12 | 0        |
| 8Mar2011- | 17759 | 909.22  | -1.99927 | 4 R.RTSDSMI chr4@6771   | 1.34E-10 | 0.005616 |
| 8Mar2011- | 2742  | 657.39  | 8.089953 | 2 R.QLQMSP chr5@7160    | 8.11E-11 | 0.004004 |
| 8Mar2011- | 17845 | 909.21  | -12.9565 | 4 R.RTSDSMI chr4@6771   | 4.72E-11 | 0.002289 |
| 8Mar2011- | 13356 | 737.1   | -4.97504 | 4 R.NAEAAAT Splice@chr  | 1.61E-13 | 0        |
| 8Mar2011- | 8825  | 1017.59 | -22.5744 | 1 R.SSVIMLIV chr2@5767  | 1.88E-11 | 8.79E-04 |
| 8Mar2011- | 11182 | 1156.56 | 11.5499  | 3 _HTGPGVI Splice@chr   | 3.17E-13 | 0        |
| 8Mar2011- | 5723  | 748.39  | -27.6021 | 2 K.QKSNWH chr5@1229    | 1.43E-11 | 6.62E-04 |
| 8Mar2011- | 2930  | 461.9   | 6.268311 | 3 K.TAEHVEC Splice@chr  | 8.02E-11 | 0.004004 |
| 8Mar2011- | 13619 | 888.47  | 22.8338  | 2 K.DITLEVEA Splice@chr | 1.27E-12 | 0        |
| 8Mar2011- | 11509 | 1156.9  | 16.3571  | 3 _HTGPGVI Splice@chr   | 6.06E-16 | 0        |
| 8Mar2011- | 9260  | 509.3   | -20.473  | 2 R.SSVIMLIV chr2@5767  | 1.38E-10 | 0.004018 |
| 8Mar2011- | 17153 | 888.98  | -11.3808 | 2 L.KDIKNTLT chr1@1467  | 3.67E-10 | 0.009171 |
| 8Mar2011- | 16280 | 1003.19 | 17.13413 | 3 R.CWNRRA Splice@chr   | 7.16E-13 | 0        |
| 8Mar2011- | 3463  | 692.35  | 11.91862 | 2 K.TAEHVEC Splice@chr  | 4.43E-13 | 0        |
| 8Mar2011- | 18593 | 1147.25 | 13.44098 | 3 R.FQSAAIG Splice@chr  | 1.60E-16 | 0        |
| 8Mar2011- | 12752 | 606.67  | -2.35139 | 3 I.NRFNISK chrX@1250   | 1.41E-10 | 0.004018 |
| 8Mar2011- | 18615 | 1147.25 | 13.44098 | 3 R.FQSAAIG Splice@chr  | 1.83E-12 | 1.59E-04 |
| 8Mar2011- | 1520  | 422.27  | 2.173301 | 2 K.IGKGEVLI chrX@1204  | 1.02E-10 | 0.002735 |
| 8Mar2011- | 7060  | 895.51  | -6.04083 | 2 _SGISIEVN Splice@chr  | 3.15E-10 | 0.008486 |
| 8Mar2011- | 5721  | 741.39  | -17.2291 | 2 K.QKSNWH chr5@1229    | 3.15E-11 | 0.00103  |

|           |       |         |          |                          |          |          |
|-----------|-------|---------|----------|--------------------------|----------|----------|
| 8Mar2011- | 11489 | 881.92  | -2.80647 | 2 F.LQEQGTY Splice@chr   | 5.10E-11 | 0.00172  |
| 8Mar2011- | 11795 | 725.88  | -4.04164 | 2 I.NFLQLYDI Splice@chr  | 7.24E-11 | 0.001966 |
| 8Mar2011- | 16594 | 895.78  | -1.06827 | 3 _ .RELTEEDI Splice@chr | 4.90E-12 | 1.59E-04 |
| 8Mar2011- | 6080  | 748.4   | -14.2094 | 2 K.QKSNWH chr5@1229     | 1.57E-11 | 3.09E-04 |
| 8Mar2011- | 12381 | 801.71  | 5.720343 | 3 K.FFKPNTD chr5@7527    | 4.51E-15 | 0        |
| 8Mar2011- | 16633 | 895.79  | 10.03186 | 3 _ .RELTEEDI Splice@chr | 9.63E-11 | 0.00248  |
| 8Mar2011- | 3269  | 557.84  | 24.08391 | 2 R.EVIKHFN' chrX@9231   | 3.20E-10 | 0.008486 |
| 8Mar2011- | 13940 | 1005.48 | -6.41263 | 2 K.KVELALW Splice@chr   | 2.69E-22 | 0        |
| 8Mar2011- | 3373  | 602.24  | -7.71522 | 2 K.YCCVFPD Splice@chr   | 9.99E-11 | 0.002611 |
| 8Mar2011- | 13625 | 1153.23 | -17.5731 | 3 F.EGIRTGG' Splice@chr  | 1.38E-14 | 0        |
| 8Mar2011- | 9007  | 1137.65 | -15.1425 | 1 Q.FLVISFA\ chrX@1232   | 1.78E-10 | 0.005005 |
| 8Mar2011- | 2713  | 756.39  | 1.131206 | 2 K.KTAEHVE chr5@1002    | 9.09E-14 | 0        |
| 8Mar2011- | 10671 | 656.35  | -16.915  | 2 K.FINFSNN' Splice@chr  | 4.04E-10 | 0.00986  |
| 8Mar2011- | 15122 | 818.17  | 14.73832 | 4 S.DFFPTEQ Splice@chr   | 1.26E-15 | 0        |
| 8Mar2011- | 3531  | 461.9   | 6.268311 | 3 K.TAEHVEC chr5@1002    | 3.31E-10 | 0.008602 |
| 8Mar2011- | 13840 | 639.37  | -20.365  | 2 R.SPIK+14.( Splice@chr | 2.03E-10 | 0.006014 |
| 8Mar2011- | 5440  | 741.39  | -17.2291 | 2 K.QKSNWH chr5@1229     | 5.39E-11 | 0.001832 |
| 8Mar2011- | 13099 | 806.38  | 3.362099 | 3 K.FFKPNTD chr5@7527    | 1.54E-17 | 0        |
| 8Mar2011- | 792   | 743.48  | 2.794988 | 1 K.KIGGAGII chr1@2883   | 2.60E-10 | 0.00703  |
| 8Mar2011- | 14136 | 888.47  | 22.8338  | 2 K.DITLEVEA' Splice@chr | 4.12E-13 | 0        |
| 8Mar2011- | 3509  | 692.35  | 11.91862 | 2 K.TAEHVEC Splice@chr   | 5.30E-13 | 0        |
| 8Mar2011- | 2649  | 506.78  | 5.370163 | 2 _ .VDKNVYF chr4@1192   | 2.99E-10 | 0.007764 |
| 8Mar2011- | 5775  | 741.39  | -17.2291 | 2 K.QKSNWH chr5@1229     | 4.58E-11 | 0.001447 |
| 8Mar2011- | 16322 | 1003.19 | 17.13413 | 3 R.CWNRRRA Splice@chr   | 1.68E-11 | 3.09E-04 |
| 8Mar2011- | 18813 | 770.43  | -18.4033 | 3 K.YLDAKCK chr4@3751    | 4.85E-11 | 0.001581 |
| 8Mar2011- | 17245 | 634.84  | 6.410455 | 2 R.VDIGDILF Splice@chr  | 4.64E-12 | 1.59E-04 |
| 8Mar2011- | 3119  | 915.47  | 1.201399 | 1 K.FHEIGGQ chrX@4727    | 3.20E-11 | 0.00103  |
| 8Mar2011- | 16001 | 665.37  | -26.6417 | 2 Q.INNK+14 Splice@chr   | 3.15E-10 | 0.008255 |
| 8Mar2011- | 4584  | 593.3   | 1.442689 | 2 H.PPDQQN Splice@chr    | 3.48E-10 | 0.008965 |
| 8Mar2011- | 11852 | 725.88  | -4.04164 | 2 I.NFLQLYDI Splice@chr  | 2.19E-10 | 0.006117 |
| 8Mar2011- | 3173  | 695.35  | -9.5814  | 2 R.SSAEK+1. chr3@3299   | 2.67E-10 | 0.00703  |
| 8Mar2011- | 3562  | 692.35  | 11.91862 | 2 K.TAEHVEC Splice@chr   | 8.96E-13 | 0        |
| 8Mar2011- | 2965  | 537.31  | -2.44714 | 2 R.NAQEGV. chr5@1536    | 2.37E-10 | 0.006592 |
| 8Mar2011- | 3480  | 461.9   | 6.268311 | 3 K.TAEHVEC Splice@chr   | 9.46E-11 | 0.00248  |
| 8Mar2011- | 18386 | 673.71  | -19.9391 | 3 _ .CGTVFSK chrX@1163   | 1.98E-10 | 0.006014 |
| 8Mar2011- | 13043 | 955.46  | -21.0803 | 2 R.GFRVEDK chr4@4626    | 3.86E-10 | 0.009499 |
| 8Mar2011- | 10743 | 933.4   | -28.0819 | 2 S.SPEVPEN' Splice@chr  | 1.18E-11 | 3.09E-04 |
| 8Mar2011- | 6127  | 748.4   | -14.2094 | 2 K.QKSNWH chr5@1229     | 2.92E-11 | 0.00103  |
| 8Mar2011- | 3332  | 458.24  | 3.604198 | 2 K.FHEIGGQ chrX@4727    | 3.37E-10 | 0.008965 |
| 8Mar2011- | 5494  | 741.39  | -17.2291 | 2 K.QKSNWH chr5@1229     | 1.56E-11 | 3.09E-04 |
| 8Mar2011- | 7898  | 599.96  | 10.97902 | 3 R.NAEAAAT' Splice@chr  | 1.05E-10 | 0.002735 |
| 8Mar2011- | 1497  | 843.54  | 11.44605 | 1 K.IGKGEVLI chrX@1204   | 3.87E-10 | 0.009499 |
| 8Mar2011- | 18579 | 1147.25 | 13.44098 | 3 R.FQSAAIG Splice@chr   | 5.57E-17 | 0        |
| 8Mar2011- | 7911  | 899.43  | 4.113633 | 2 R.NAEAAAT' Splice@chr  | 6.55E-18 | 0        |
| 8Mar2011- | 17248 | 805.47  | -13.7324 | 2 K.TPIFIPAP' chr5@1861  | 7.37E-11 | 0.001966 |
| 8Mar2011- | 12436 | 801.71  | 5.720343 | 3 K.FFKPNTD chr5@7527    | 2.31E-17 | 0        |
| 8Mar2011- | 6438  | 622.87  | 27.55551 | 2 R.NCLLSPRi chr4@2860   | 1.91E-10 | 0.005638 |

|           |       |         |          |                          |          |          |
|-----------|-------|---------|----------|--------------------------|----------|----------|
| 8Mar2011- | 6986  | 517.81  | 0.179403 | 2 R.FPITFALP chr3@6237   | 3.09E-10 | 0.008255 |
| 8Mar2011- | 4472  | 510.28  | -0.35954 | 2 R.STLSIFSH chr1@1111   | 2.60E-10 | 0.00703  |
| 8Mar2011- | 722   | 449.25  | -7.35873 | 2 R.KKYGASS chr4@1090    | 1.32E-10 | 0.00364  |
| 8Mar2011- | 6912  | 734.43  | 10.70263 | 2 L.TEQSVFK chr5@2036    | 3.63E-10 | 0.009171 |
| 8Mar2011- | 19008 | 766.63  | 17.32578 | 4 _._QK+14.01 Splice@chr | 8.21E-11 | 0.002224 |
| 8Mar2011- | 14662 | 601     | 8.884201 | 3 K.QFLTFLT/ chr4@7690   | 3.76E-10 | 0.008489 |
| 8Mar2011- | 13359 | 895.78  | -1.06827 | 3 _._RELTEEDI Splice@chr | 3.68E-11 | 3.34E-04 |
| 8Mar2011- | 1198  | 579.3   | -9.87496 | 2 _._YLQHPIEI Splice@chr | 4.39E-10 | 0.009137 |
| 8Mar2011- | 1767  | 741.39  | -17.2291 | 2 K.QKSNWH chr5@1229     | 1.18E-10 | 0.002351 |
| 8Mar2011- | 2448  | 741.39  | -17.2291 | 2 K.QKSNWH chr5@1229     | 3.08E-10 | 0.007121 |
| 8Mar2011- | 14012 | 1042.04 | -10.9972 | 2 R.NFQENGI chr1@1316    | 3.00E-10 | 0.006983 |
| 8Mar2011- | 1730  | 741.39  | -9.64508 | 2 K.FPENRHI/ chr2@1477   | 3.11E-10 | 0.007396 |
| 8Mar2011- | 3145  | 652.35  | -13.643  | 2 R.RSKQK+1 Splice@chr   | 3.82E-10 | 0.008774 |
| 8Mar2011- | 2702  | 741.39  | -17.2291 | 2 K.QKSNWH chr5@1229     | 4.59E-11 | 6.59E-04 |
| 8Mar2011- | 15625 | 860.69  | 14.08015 | 4 R.FQSAAIG Splice@chr   | 3.83E-12 | 0        |
| 8Mar2011- | 3105  | 748.4   | -14.2094 | 2 K.QKSNWH chr5@1229     | 5.71E-11 | 9.77E-04 |
| 8Mar2011- | 11074 | 982     | 10.88823 | 2 R.TVMVQN Splice@chr    | 7.31E-18 | 0        |
| 8Mar2011- | 2564  | 494.6   | -1.40142 | 3 K.FPENRHI/ chr2@1477   | 3.26E-10 | 0.007679 |
| 8Mar2011- | 8807  | 1156.9  | 16.3571  | 3 _._HTGPGVI Splice@chr  | 4.82E-15 | 0        |
| 8Mar2011- | 8804  | 694.54  | 11.7794  | 5 _._HTGPGVI Splice@chr  | 1.10E-10 | 0.002351 |
| 8Mar2011- | 6207  | 862.49  | -13.1906 | 1 R.KMRIADk chr4@1399    | 4.02E-10 | 0.008879 |
| 8Mar2011- | 15605 | 860.69  | 14.08015 | 4 R.FQSAAIG Splice@chr   | 2.59E-14 | 0        |
| 8Mar2011- | 12094 | 848.98  | 12.59627 | 2 R.LLELAPTC chr2@6685   | 4.19E-17 | 0        |
| 8Mar2011- | 13238 | 665.37  | -26.6417 | 2 Q.INNK+14 Splice@chr   | 4.29E-10 | 0.009137 |
| 8Mar2011- | 7133  | 886     | 3.172487 | 2 F.ENVVEVII Splice@chr  | 1.00E-12 | 0        |
| 8Mar2011- | 2495  | 741.39  | -17.2291 | 2 K.QKSNWH chr5@1229     | 8.88E-11 | 0.001754 |
| 8Mar2011- | 15167 | 777.08  | 13.6322  | 3 Q.EPVEDGI Splice@chr   | 9.85E-11 | 0.00205  |
| 8Mar2011- | 2646  | 741.39  | -17.2291 | 2 K.QKSNWH chr5@1229     | 1.45E-11 | 3.34E-04 |
| 8Mar2011- | 10758 | 1062.56 | 21.08375 | 2 _._RRSLKIAC chr1@9145  | 2.90E-11 | 3.34E-04 |
| 8Mar2011- | 4175  | 533.82  | 16.26677 | 2 K.TNIYTILTI chr5@1329  | 2.38E-10 | 0.006013 |
| 8Mar2011- | 10725 | 1153.23 | -17.5731 | 3 F.EGIRTGG Splice@chr   | 7.00E-12 | 0        |
| 8Mar2011- | 11205 | 965.52  | 17.33925 | 4 R.KTSSCQK chr5@2085    | 1.57E-10 | 0.003392 |
| 8Mar2011- | 9756  | 1005.17 | -11.4269 | 3 L.LTTCNRRI Splice@chr  | 3.27E-10 | 0.007679 |
| 8Mar2011- | 16058 | 783.75  | 7.307848 | 3 K.INWAVTI chr4@2890    | 9.87E-17 | 0        |
| 8Mar2011- | 4566  | 717.89  | -17.2831 | 2 K.LRGWNK chr3@8881     | 3.35E-10 | 0.007808 |
| 8Mar2011- | 8309  | 671.37  | -24.0361 | 2 T.FNIVHTQ Splice@chr   | 2.67E-10 | 0.006573 |
| 8Mar2011- | 3001  | 748.4   | -14.2094 | 2 K.QKSNWH chr5@1229     | 6.01E-11 | 9.77E-04 |
| 8Mar2011- | 11320 | 888.47  | 22.8338  | 2 K.DITLEVEA Splice@chr  | 9.03E-13 | 0        |
| 8Mar2011- | 15179 | 996.87  | -23.3576 | 3 S.VPFSK+14 Splice@chr  | 4.18E-10 | 0.009006 |
| 8Mar2011- | 7070  | 663.85  | -5.06443 | 2 N.KMIFSMI chr4@8622    | 2.98E-10 | 0.006983 |
| 8Mar2011- | 3052  | 748.4   | -14.2094 | 2 K.QKSNWH chr5@1229     | 4.04E-11 | 3.34E-04 |
| 8Mar2011- | 9990  | 1030.01 | 4.745214 | 2 L.SPIPEVPC Splice@chr  | 5.43E-18 | 0        |
| 8Mar2011- | 13396 | 895.79  | 10.03186 | 3 _._RELTEEDI Splice@chr | 2.86E-11 | 3.34E-04 |
| 8Mar2011- | 15809 | 507.03  | -19.4794 | 4 K.VFLLHFF chr5@1115    | 4.36E-11 | 6.59E-04 |
| 8Mar2011- | 4199  | 895.52  | 5.155701 | 2 _._SGISIEVN Splice@chr | 4.11E-10 | 0.009006 |
| 8Mar2011- | 2592  | 741.39  | -17.2291 | 2 K.QKSNWH chr5@1229     | 1.53E-11 | 3.34E-04 |
| 8Mar2011- | 7386  | 1162.23 | 14.80982 | 3 _._HTGPGVI Splice@chr  | 8.11E-14 | 0        |

|           |       |         |          |                          |          |          |
|-----------|-------|---------|----------|--------------------------|----------|----------|
| 8Mar2011- | 15139 | 777.08  | 13.6322  | 3 Q.EPVEDGI Splice@chr   | 4.14E-11 | 5.01E-04 |
| 8Mar2011- | 327   | 437.94  | -16.8557 | 3 K.QAFKHGI chr1@2569    | 8.87E-11 | 0.001754 |
| 8Mar2011- | 13198 | 665.37  | -26.6417 | 2 Q.INNK+14 Splice@chr   | 3.55E-10 | 0.008224 |
| 8Mar2011- | 3076  | 553.33  | -26.4877 | 2 K.LEPKPGP chr2@1375    | 2.59E-10 | 0.006435 |
| 8Mar2011- | 13439 | 895.78  | -1.06827 | 3 _..RELTEEDI Splice@chr | 2.74E-12 | 0        |
| 8Mar2011- | 13743 | 895.79  | 10.03186 | 3 _..RELTEEDI Splice@chr | 1.41E-12 | 0        |
| 8Mar2011- | 10042 | 1030.01 | 4.745214 | 2 L.SPIPEVPC Splice@chr  | 6.57E-18 | 0        |
| 8Mar2011- | 12702 | 990.51  | 18.03905 | 3 S.PGGPENY Splice@chr   | 2.51E-12 | 0        |
| 8Mar2011- | 1798  | 741.39  | -17.2291 | 2 K.QKSNWH chr5@1229     | 3.26E-11 | 3.34E-04 |
| 8Mar2011- | 2540  | 741.39  | -17.2291 | 2 K.QKSNWH chr5@1229     | 8.33E-11 | 0.001596 |
| 8Mar2011- | 14852 | 909.82  | -3.91826 | 3 Y.FRLQGSII chrX@9509   | 3.78E-10 | 0.008489 |
| 8Mar2011- | 4081  | 517.81  | 0.179403 | 2 R.FPITFALP chr3@6237   | 1.30E-10 | 0.002651 |
| 8Mar2011- | 16060 | 1175.12 | 6.371728 | 2 K.INWAVTI chr4@2890    | 4.03E-22 | 0        |
| 8Mar2011- | 12426 | 937     | -18.3647 | 2 R.NPFLEEV chr3@1097    | 5.09E-13 | 0        |
| 8Mar2011- | 5388  | 435.25  | -4.00582 | 2 K.KISAHGTI chr4@1727   | 2.89E-10 | 0.006851 |
| 8Mar2011- | 14324 | 634.84  | 6.410455 | 2 R.VDIGDILF Splice@chr  | 1.31E-11 | 1.79E-04 |
| 8Mar2011- | 3718  | 693.87  | -6.6949  | 2 V.ICVAVGD chr5@1065    | 3.58E-10 | 0.008224 |
| 8Mar2011- | 13600 | 895.78  | -1.06827 | 3 _..RELTEEDI Splice@chr | 1.00E-12 | 0        |
| 8Mar2011- | 6998  | 558.3   | -2.40945 | 3 R.EK+14.01 chr1@1077   | 1.42E-11 | 3.34E-04 |
| 8Mar2011- | 11733 | 1156.9  | 16.3571  | 3 _..HTGPGVI Splice@chr  | 1.90E-12 | 0        |
| 8Mar2011- | 17752 | 860.69  | 14.08015 | 4 R.FQSAAIG Splice@chr   | 4.70E-15 | 0        |
| 8Mar2011- | 5345  | 741.39  | -17.2291 | 2 K.QKSNWH chr5@1229     | 4.59E-11 | 0.00206  |
| 8Mar2011- | 18163 | 783.75  | 7.307848 | 3 K.INWAVTI chr4@2890    | 1.27E-12 | 0        |
| 8Mar2011- | 6280  | 553.33  | -3.70337 | 2 K.PQAKPNI chr5@9002    | 2.54E-11 | 0.001161 |
| 8Mar2011- | 1380  | 422.27  | 2.173301 | 2 K.IGKGEVLI chrX@1204   | 1.06E-10 | 0.003171 |
| 8Mar2011- | 10327 | 933.41  | -17.4121 | 2 S.SPEVPEN Splice@chr   | 1.68E-12 | 0        |
| 8Mar2011- | 4973  | 741.39  | -17.2291 | 2 K.QKSNWH chr5@1229     | 1.02E-10 | 0.003028 |
| 8Mar2011- | 13557 | 888.47  | 22.8338  | 2 K.DITLEVEA Splice@chr  | 4.07E-12 | 0        |
| 8Mar2011- | 2466  | 506.78  | 5.370163 | 2 _..VDKNVYF chr4@1192   | 3.42E-10 | 0.009414 |
| 8Mar2011- | 11028 | 881.92  | -2.80647 | 2 F.LQEQGTY Splice@chr   | 1.16E-11 | 6.97E-04 |
| 8Mar2011- | 859   | 407.27  | -8.49611 | 2 K.KVKGGVF chrX@2505    | 3.14E-11 | 0.001473 |
| 8Mar2011- | 1140  | 743.48  | 2.794988 | 1 K.KIGGAGII chr1@2885   | 8.66E-11 | 0.002753 |
| 8Mar2011- | 5583  | 748.4   | -14.2094 | 2 K.QKSNWH chr5@1229     | 1.07E-10 | 0.003295 |
| 8Mar2011- | 18070 | 491.01  | -24.5182 | 4 K.TKENAIP\ chrX@8495   | 1.17E-10 | 0.003295 |
| 8Mar2011- | 18408 | 929.01  | -26.3075 | 2 I.RWSLSISV Splice@chr  | 9.25E-11 | 0.002888 |
| 8Mar2011- | 13866 | 829.44  | 22.15469 | 2 R.FADLPFA chr2@1282    | 9.20E-11 | 0.002888 |
| 8Mar2011- | 3073  | 458.24  | 3.604198 | 2 K.FHEIGGQ chrX@4727    | 6.54E-11 | 0.002489 |
| 8Mar2011- | 804   | 419.23  | -7.22396 | 2 R.RSPELVH chr5@4179    | 3.34E-10 | 0.009299 |
| 8Mar2011- | 800   | 425.23  | 12.96682 | 2 K.HLNEHA\ chr5@5137    | 3.36E-10 | 0.009414 |
| 8Mar2011- | 5291  | 741.39  | -17.2291 | 2 K.QKSNWH chr5@1229     | 1.71E-11 | 0.001015 |
| 8Mar2011- | 13581 | 1020.79 | 12.87309 | 3 R.MQVLHE Splice@chr    | 3.67E-12 | 0        |
| 8Mar2011- | 5086  | 741.39  | -17.2291 | 2 K.QKSNWH chr5@1229     | 6.58E-11 | 0.002489 |
| 8Mar2011- | 13343 | 982     | 10.88823 | 2 R.TVMVQN chr4@4659     | 8.68E-16 | 0        |
| 8Mar2011- | 14826 | 855.46  | -13.7147 | 3 _..RVKYQKF Splice@chr  | 3.23E-10 | 0.009179 |
| 8Mar2011- | 13500 | 983.97  | 4.629411 | 2 R.SFSTIPDS chr2@1305   | 5.48E-19 | 0        |
| 8Mar2011- | 13333 | 888.97  | 20.94366 | 2 K.DITLEVEA Splice@chr  | 4.96E-16 | 0        |
| 8Mar2011- | 10296 | 648.67  | -5.75042 | 3 R.CVGLMD chr4@1320     | 3.22E-10 | 0.009179 |

|           |       |         |          |                          |          |          |
|-----------|-------|---------|----------|--------------------------|----------|----------|
| 8Mar2011- | 13990 | 876.45  | -13.3575 | 2 K.KEM+15. chrX@1160    | 1.29E-10 | 0.003408 |
| 8Mar2011- | 14280 | 963.46  | -29.2623 | 1 K.FPRDNW chr5@1152     | 3.08E-10 | 0.008914 |
| 8Mar2011- | 5637  | 748.4   | -14.2094 | 2 K.QKSNWH chr5@1229     | 2.27E-11 | 0.001161 |
| 8Mar2011- | 14187 | 899.02  | -4.45311 | 2 K.RK+14.01 chrX@2598   | 2.13E-10 | 0.00585  |
| 8Mar2011- | 11677 | 1156.9  | 16.3571  | 3 _ .HTGPGVI Splice@chr  | 6.43E-13 | 0        |
| 8Mar2011- | 14330 | 849.48  | 10.61812 | 2 R.LLELAPT chr2@6685    | 1.40E-18 | 0        |
| 8Mar2011- | 10150 | 773.38  | -1.0273  | 2 R.SRICYWY chr3@9781    | 2.66E-10 | 0.007448 |
| 8Mar2011- | 11943 | 801.71  | 5.720343 | 3 K.FFKPNTD chr5@7527    | 1.62E-10 | 0.00468  |
| 8Mar2011- | 3168  | 692.35  | 11.91862 | 2 K.TAEHVEC Splice@chr   | 1.49E-13 | 0        |
| 8Mar2011- | 14352 | 669.36  | -13.2955 | 2 K.LEFNISK chr1@1931    | 2.29E-11 | 0.001161 |
| 8Mar2011- | 583   | 471.76  | 18.99475 | 2 K.RSPACVP Splice@chr   | 5.18E-11 | 0.002203 |
| 8Mar2011- | 11883 | 801.71  | 5.720343 | 3 K.FFKPNTD chr5@7527    | 2.86E-16 | 0        |
| 8Mar2011- | 4855  | 1107.58 | 16.10609 | 1 R.M+15.99 Splice@chr   | 1.89E-10 | 0.005055 |
| 8Mar2011- | 3854  | 859.5   | -9.53539 | 1 K.DTAVAIIF chrX@8477   | 3.44E-10 | 0.009414 |
| 8Mar2011- | 9408  | 663.85  | -5.06443 | 2 N.KMIFSMI chr4@8622    | 2.17E-10 | 0.00585  |
| 8Mar2011- | 16462 | 805.97  | -15.8175 | 2 K.TPIFIPAP chr5@1861   | 2.11E-10 | 0.005591 |
| 8Mar2011- | 5030  | 741.39  | -17.2291 | 2 K.QKSNWH chr5@1229     | 3.98E-11 | 0.001767 |
| 8Mar2011- | 2380  | 530.31  | 5.53503  | 2 R.RIFTAAQ chr1@1130    | 1.29E-11 | 6.97E-04 |
| 8Mar2011- | 765   | 743.48  | 2.794988 | 1 K.KIGGAGII chr1@2883   | 1.73E-10 | 0.004932 |
| 8Mar2011- | 6162  | 553.33  | -3.70337 | 2 K.PQAKPNI chr5@9002    | 2.20E-10 | 0.00585  |
| 8Mar2011- | 8927  | 509.3   | -20.473  | 2 R.SSVIMLIV chr2@5767   | 3.15E-10 | 0.008914 |
| 8Mar2011- | 12349 | 1030.52 | 12.84278 | 2 L.SPIPEVPC Splice@chr  | 2.68E-19 | 0        |
| 8Mar2011- | 2511  | 506.78  | 5.370163 | 2 _ .VDKNVYF chr4@1192   | 3.36E-10 | 0.009414 |
| 8Mar2011- | 17598 | 673.71  | -19.9391 | 3 _ .CGTVFSK chrX@1163   | 1.11E-10 | 0.003295 |
| 8Mar2011- | 16516 | 634.84  | 6.410455 | 2 R.VDIGDILF Splice@chr  | 7.83E-13 | 0        |
| 8Mar2011- | 2137  | 803.47  | -29.0116 | 1 R.KTAAAGF chrX@5489    | 9.35E-12 | 0        |
| 8Mar2011- | 3966  | 693.87  | -22.5509 | 2 L.VEKSVFP chr3@2866    | 2.64E-10 | 0.005408 |
| 8Mar2011- | 11947 | 1005.48 | -6.41263 | 2 K.KVELALW Splice@chr   | 2.75E-22 | 0        |
| 8Mar2011- | 11967 | 982     | 10.88823 | 2 R.TVMVQN Splice@chr    | 2.51E-16 | 0        |
| 8Mar2011- | 10562 | 1134.05 | -14.1995 | 2 _ .IPSAVGY Splice@chr  | 3.48E-16 | 0        |
| 8Mar2011- | 8444  | 468.25  | 8.948133 | 2 K.IEDFLGNI chr1@1494   | 3.58E-10 | 0.008122 |
| 8Mar2011- | 2779  | 407.74  | 5.852463 | 2 R.ASDIAPIK chrX@1799   | 1.77E-10 | 0.003733 |
| 8Mar2011- | 4346  | 533.82  | 16.26677 | 2 K.TNIYTILTI chr5@1329  | 3.76E-10 | 0.008854 |
| 8Mar2011- | 13075 | 826.46  | 16.61153 | 2 _ .K+14.016 Splice@chr | 5.66E-11 | 8.64E-04 |
| 8Mar2011- | 9364  | 881.92  | -2.80647 | 2 F.LQEQGTY Splice@chr   | 9.60E-12 | 0        |
| 8Mar2011- | 8873  | 682.33  | -11.6457 | 2 P.LSSWNVF Splice@chr   | 4.54E-10 | 0.00967  |
| 8Mar2011- | 13261 | 991.51  | 24.02083 | 3 _ .IYVPADD Splice@chr  | 5.56E-16 | 0        |
| 8Mar2011- | 11495 | 1153.23 | -17.5731 | 3 F.EGIRTGG Splice@chr   | 3.51E-14 | 0        |
| 8Mar2011- | 11466 | 626.34  | 7.12517  | 2 R.YMRGGG chr5@1690     | 1.36E-11 | 0        |
| 8Mar2011- | 9217  | 694.54  | 11.7794  | 5 _ .HTGPGVI Splice@chr  | 4.34E-10 | 0.00953  |
| 8Mar2011- | 8903  | 772.73  | -26.3466 | 3 R.ANISMIEI chr3@7763   | 1.10E-10 | 0.002009 |
| 8Mar2011- | 2839  | 936.48  | 27.86052 | 1 K.LNGGYEC chr2@1191    | 1.76E-11 | 1.84E-04 |
| 8Mar2011- | 8439  | 656.35  | -16.915  | 2 K.FINFSNN Splice@chr   | 4.04E-10 | 0.009288 |
| 8Mar2011- | 9317  | 1156.56 | 11.5499  | 3 _ .HTGPGVI Splice@chr  | 1.69E-13 | 0        |
| 8Mar2011- | 4246  | 434.24  | 13.9946  | 3 _ .RSNDQTI chr5@6378   | 2.31E-10 | 0.004642 |
| 8Mar2011- | 2756  | 741.9   | -5.97516 | 2 K.QKSNWH chr5@1229     | 6.18E-11 | 8.64E-04 |
| 8Mar2011- | 2755  | 787.44  | 10.94316 | 1 K.SDAAPAK chrX@8018    | 4.56E-10 | 0.00967  |

|           |       |         |          |                          |          |          |
|-----------|-------|---------|----------|--------------------------|----------|----------|
| 8Mar2011- | 8269  | 657.04  | -26.9179 | 3 R.GNVRK+1 chrX@7490    | 2.55E-11 | 3.65E-04 |
| 8Mar2011- | 4777  | 717.89  | -17.2831 | 2 K.LRGWNK chr3@8881     | 1.80E-10 | 0.003733 |
| 8Mar2011- | 12890 | 722.45  | -4.95112 | 2 R.RK+14.01 Splice@chr  | 1.99E-10 | 0.003876 |
| 8Mar2011- | 1704  | 741.39  | -17.2291 | 2 K.QKSNWH chr5@1229     | 2.78E-11 | 3.65E-04 |
| 8Mar2011- | 1856  | 741.39  | -17.2291 | 2 K.QKSNWH chr5@1229     | 2.42E-11 | 1.84E-04 |
| 8Mar2011- | 1814  | 741.39  | -17.2291 | 2 K.QKSNWH chr5@1229     | 2.85E-11 | 3.65E-04 |
| 8Mar2011- | 9247  | 1156.9  | 16.3571  | 3 _ .HTGPGVI Splice@chr  | 1.33E-15 | 0        |
| 8Mar2011- | 13568 | 879.14  | -23.3383 | 3 K.RSMTQR' chr5@8252    | 2.74E-11 | 3.65E-04 |
| 8Mar2011- | 7331  | 558.3   | -2.40945 | 3 R.EK+14.01 chr1@1077   | 9.95E-11 | 0.001681 |
| 8Mar2011- | 5824  | 695.42  | -0.61526 | 1 R.GAGIHIK. chrX@7403   | 4.79E-10 | 0.009965 |
| 8Mar2011- | 13067 | 669.36  | -13.2955 | 2 K.LEFNISKI chr1@1931   | 2.22E-11 | 1.84E-04 |
| 8Mar2011- | 7486  | 663.85  | -5.06443 | 2 N.KMIFSMI chr4@8622    | 1.38E-10 | 0.002797 |
| 8Mar2011- | 9870  | 1156.89 | 7.624255 | 3 _ .HTGPGVI Splice@chr  | 2.05E-12 | 0        |
| 8Mar2011- | 2643  | 741.39  | -17.2291 | 2 K.QKSNWH chr5@1229     | 7.19E-11 | 0.001196 |
| 8Mar2011- | 13535 | 913     | 7.629518 | 2 F.TEMPLGC chrX@9861    | 1.06E-10 | 0.001847 |
| 8Mar2011- | 2805  | 741.91  | 7.461902 | 2 K.QKSNWH chr5@1229     | 3.47E-10 | 0.007972 |
| 8Mar2011- | 11052 | 938.46  | 22.50833 | 2 R.ECSQSDS chr2@8876    | 2.36E-10 | 0.004642 |
| 8Mar2011- | 1742  | 741.39  | -9.64508 | 2 K.FPENRHI, chr2@1477   | 8.99E-11 | 0.001356 |
| 8Mar2011- | 11549 | 1153.23 | -17.5731 | 3 F.EGIRTGG' Splice@chr  | 4.04E-14 | 0        |
| 8Mar2011- | 2597  | 741.39  | -17.2291 | 2 K.QKSNWH chr5@1229     | 3.83E-11 | 5.34E-04 |
| 8Mar2011- | 3193  | 748.39  | -27.6021 | 2 K.QKSNWH chr5@1229     | 1.69E-11 | 1.84E-04 |
| 8Mar2011- | 2878  | 489.28  | 28.87637 | 2 R.RGTASRS chr5@1951    | 5.84E-11 | 8.64E-04 |
| 8Mar2011- | 9030  | 532.81  | -8.37817 | 2 K.ILTGMK+ Splice@chr   | 8.86E-11 | 0.001356 |
| 8Mar2011- | 13126 | 826.46  | 16.61153 | 2 _ .K+14.016 Splice@chr | 5.66E-11 | 8.64E-04 |
| 8Mar2011- | 2237  | 741.39  | -17.2291 | 2 K.QKSNWH chr5@1229     | 1.01E-10 | 0.001681 |
| 8Mar2011- | 5238  | 539.27  | 23.92649 | 2 R.SEEEVESI chrX@3640   | 3.27E-10 | 0.007376 |
| 8Mar2011- | 2100  | 803.47  | -29.0116 | 1 R.KTAAAGF chrX@5489    | 1.59E-11 | 1.84E-04 |
| 8Mar2011- | 1672  | 741.39  | -17.2291 | 2 K.QKSNWH chr5@1229     | 7.50E-11 | 0.001196 |
| 8Mar2011- | 5949  | 725.88  | 19.33943 | 2 R.MEHLCRI Splice@chr   | 4.50E-11 | 7.04E-04 |
| 8Mar2011- | 2699  | 741.39  | -17.2291 | 2 K.QKSNWH chr5@1229     | 3.40E-11 | 5.34E-04 |
| 8Mar2011- | 11908 | 982     | 10.88823 | 2 R.TVMVQN chr4@4659     | 4.14E-21 | 0        |
| 8Mar2011- | 7756  | 1162.23 | 14.80982 | 3 _ .HTGPGVI Splice@chr  | 1.57E-12 | 0        |
| 8Mar2011- | 12420 | 769.42  | -23.8029 | 2 K.KEK+14.0 chr2@5601   | 1.57E-10 | 0.00295  |
| 8Mar2011- | 2835  | 915.47  | 1.201399 | 1 K.FHEIGGQ chrX@4727    | 1.32E-10 | 0.003469 |
| 8Mar2011- | 7905  | 695.42  | -0.61526 | 1 R.GAGIHIK. chrX@7403   | 4.79E-10 | 0.009455 |
| 8Mar2011- | 9494  | 886     | 3.172487 | 2 F.ENVVEVII Splice@chr  | 1.24E-13 | 0        |
| 8Mar2011- | 6302  | 410.23  | -25.2801 | 2 _ .FGLIGAG' chr4@3758  | 7.50E-12 | 0        |
| 8Mar2011- | 3687  | 527.77  | -20.0449 | 2 F.LEDITQH, Splice@chr  | 8.86E-11 | 0.002842 |
| 8Mar2011- | 10725 | 671.37  | -24.0361 | 2 T.FNIVHTQ Splice@chr   | 4.26E-10 | 0.009099 |
| 8Mar2011- | 6366  | 434.24  | 13.9946  | 3 _ .RSNDQTI chr5@6378   | 2.01E-10 | 0.005216 |
| 8Mar2011- | 5578  | 748.4   | -14.2094 | 2 K.QKSNWH chr5@1229     | 3.60E-11 | 0.001382 |
| 8Mar2011- | 3010  | 916.49  | -15.949  | 1 K.QREIGGC chr1@2506    | 1.81E-10 | 0.004335 |
| 8Mar2011- | 735   | 743.48  | 2.794988 | 1 K.KIGGAGII chr1@2883   | 1.73E-10 | 0.004131 |
| 8Mar2011- | 10410 | 661.4   | -2.4954  | 2 K.LVLIAVN' chr1@6528   | 4.76E-10 | 0.009455 |
| 8Mar2011- | 7866  | 496.3   | 9.488848 | 2 R.EIKLFDVK Splice@chr  | 3.17E-10 | 0.007766 |
| 8Mar2011- | 2739  | 562.31  | -13.4391 | 2 R.FYLLLYLK Splice@chr  | 7.41E-11 | 0.002639 |
| 8Mar2011- | 1620  | 873.51  | -11.1925 | 1 R.QLGFPIAI chr3@2252   | 3.51E-10 | 0.008375 |

|           |       |         |          |                          |          |          |
|-----------|-------|---------|----------|--------------------------|----------|----------|
| 8Mar2011- | 4977  | 741.39  | -17.2291 | 2 K.QKSNWH chr5@1229     | 1.19E-10 | 0.003271 |
| 8Mar2011- | 5187  | 741.39  | -17.2291 | 2 K.QKSNWH chr5@1229     | 9.20E-12 | 0        |
| 8Mar2011- | 2786  | 915.48  | 12.14748 | 1 K.FHEIGGQ chrX@4727    | 1.30E-10 | 0.003469 |
| 8Mar2011- | 10665 | 671.37  | -24.0361 | 2 T.FNIVHTQ Splice@chr   | 3.93E-10 | 0.008511 |
| 8Mar2011- | 280   | 419.23  | -7.22396 | 2 R.RSPELVH chr5@4179    | 3.34E-10 | 0.008375 |
| 8Mar2011- | 5234  | 552.31  | -11.2924 | 2 R.KMEVARl chr5@2903    | 3.37E-11 | 0.001132 |
| 8Mar2011- | 1595  | 585.8   | -7.30589 | 2 K.QDPISATl chr5@9928   | 1.92E-10 | 0.005028 |
| 8Mar2011- | 9824  | 1075.06 | -6.79295 | 2 R.TCSK+14. chr2@1253   | 4.82E-10 | 0.009455 |
| 8Mar2011- | 10146 | 520.78  | 10.0988  | 2 _KFEVNFE chrX@6149     | 1.75E-10 | 0.004335 |
| 8Mar2011- | 592   | 743.48  | 2.794988 | 1 K.KIGGAGlI chr1@2883   | 1.73E-10 | 0.004131 |
| 8Mar2011- | 5297  | 741.39  | -17.2291 | 2 K.QKSNWH chr5@1229     | 3.44E-11 | 0.001132 |
| 8Mar2011- | 123   | 420.72  | 12.72454 | 2 _RYTDTGK chr1@7224     | 2.23E-10 | 0.00586  |
| 8Mar2011- | 5244  | 741.39  | -17.2291 | 2 K.QKSNWH chr5@1229     | 2.60E-11 | 8.62E-04 |
| 8Mar2011- | 6205  | 422.75  | 3.545689 | 2 R.LATVTPSi chr5@2079   | 2.75E-10 | 0.006682 |
| 8Mar2011- | 9472  | 897.42  | -27.6753 | 3 _QVREMH Splice@chr     | 5.01E-10 | 0.009653 |
| 8Mar2011- | 3040  | 789.44  | 17.96022 | 1 R.FAAPLDR chr3@8971    | 3.14E-10 | 0.007766 |
| 8Mar2011- | 9439  | 886     | 3.172487 | 2 F.ENVVVEVII Splice@chr | 2.09E-11 | 0        |
| 8Mar2011- | 3614  | 634.87  | 13.67349 | 2 R.IQKCHTLI Splice@chr  | 3.15E-10 | 0.007766 |
| 8Mar2011- | 2934  | 915.48  | 12.14748 | 1 K.FHEIGGQ chrX@4727    | 3.20E-11 | 0.001132 |
| 8Mar2011- | 5267  | 435.25  | -4.00582 | 2 K.KISAHGTl chr4@1727   | 2.30E-10 | 0.00586  |
| 8Mar2011- | 4915  | 741.39  | -17.2291 | 2 K.QKSNWH chr5@1229     | 4.86E-11 | 0.001615 |
| 8Mar2011- | 7926  | 741.35  | -2.14348 | 2 R.ACTMISN chr1@3451    | 4.87E-10 | 0.009455 |
| 8Mar2011- | 621   | 743.48  | 2.794988 | 1 K.KIGGAGlI chr1@2883   | 1.73E-10 | 0.004131 |
| 8Mar2011- | 2954  | 458.24  | 3.604198 | 2 K.FHEIGGQ chrX@4727    | 1.20E-10 | 0.003271 |
| 8Mar2011- | 4860  | 741.39  | -17.2291 | 2 K.QKSNWH chr5@1229     | 2.32E-11 | 2.95E-04 |
| 8Mar2011- | 1848  | 665.39  | 11.85105 | 2 R.QLQM+1 chr5@7160     | 1.91E-10 | 0.005028 |
| 8Mar2011- | 2633  | 584.39  | -25.7045 | 2 K.KLTLLIK+ chr1@7702   | 1.03E-10 | 0.003047 |
| 8Mar2011- | 10176 | 1040.55 | 7.985099 | 1 _KFEVNFE chrX@6149     | 1.85E-10 | 0.004335 |
| 8Mar2011- | 7445  | 455.29  | 22.03473 | 2 K.TPPKNPK chr3@1222    | 4.95E-11 | 0.001651 |
| 8Mar2011- | 5673  | 602.83  | 10.24325 | 2 _NTEK+14 chr2@1162     | 2.96E-10 | 0.007271 |
| 8Mar2011- | 10134 | 626.35  | 20.39941 | 2 K.KKGRTVE chr5@4431    | 1.08E-10 | 0.003415 |
| 8Mar2011- | 12771 | 688.4   | 15.89408 | 2 R.SK+14.01 chrX@4503   | 3.25E-10 | 0.009327 |
| 8Mar2011- | 11353 | 688.4   | 15.89408 | 2 R.SK+14.01 chrX@4503   | 1.16E-10 | 0.003295 |
| 8Mar2011- | 12394 | 677.37  | 16.96547 | 4 K.NENACG! chrX@8769    | 3.00E-10 | 0.006983 |
| 8Mar2011- | 12374 | 1026.12 | 11.21785 | 3 R.M+15.99 Splice@chr   | 2.92E-15 | 0        |
| 8Mar2011- | 12234 | 1026.11 | 1.529407 | 3 R.M+15.99 Splice@chr   | 1.93E-16 | 0        |
| 8Mar2011- | 19960 | 1111.04 | 18.73219 | 2 _CRWEYK\ Splice@chr    | 5.75E-11 | 0.002178 |
| 8Mar2011- | 343   | 667.88  | 11.9547  | 2 K.KALQSLSi chrX@1522   | 2.14E-10 | 0.005222 |
| 8Mar2011- | 425   | 667.88  | 11.9547  | 2 K.KALQSLSi chrX@1522   | 2.08E-10 | 0.005106 |
| 8Mar2011- | 383   | 667.88  | 11.9547  | 2 K.KALQSLSi chrX@1522   | 2.84E-10 | 0.007511 |
| 8Mar2011- | 13010 | 1055.51 | -26.6243 | 3 R.RGGGGG chr1@1481     | 9.46E-11 | 0.003418 |
| 8Mar2011- | 19958 | 959.48  | -28.2548 | 2 T.FFCFRGS/ Splice@chr  | 4.19E-10 | 0.009083 |
| 8Mar2011- | 9349  | 546.31  | 15.27057 | 3 R.FENNDIA chr2@5116    | 8.07E-11 | 0.002773 |
| 8Mar2011- | 14854 | 1130.57 | 26.19291 | 2 R.DEENWF chr1@2282     | 4.34E-10 | 0.009929 |
| 8Mar2011- | 10511 | 874.96  | -5.48418 | 2 K.KFWQNF chr2@4241     | 1.19E-10 | 0.002781 |
| 8Mar2011- | 9830  | 716.37  | 11.60374 | 3 G.TAGTGG. chr4@1027    | 1.94E-10 | 0.003531 |
| 8Mar2011- | 16562 | 622.36  | 4.616811 | 2 K.HIFALPSR chr1@1582   | 6.13E-11 | 0.001354 |

|           |       |         |          |                         |          |          |
|-----------|-------|---------|----------|-------------------------|----------|----------|
| 8Mar2011- | 6880  | 902.42  | -25.5054 | 2 K.LDYSIVEL chr3@9753  | 3.29E-10 | 0.00613  |
| 8Mar2011- | 1554  | 665.38  | -11.6672 | 2 P.KLQICKQ Splice@chr  | 1.57E-10 | 0.003029 |
| 8Mar2011- | 5366  | 675.34  | -11.0037 | 2 K.SK+14.01 chrX@1091  | 2.72E-10 | 0.005935 |
| 8Mar2011- | 18442 | 1062.59 | 4.746574 | 2 K.NFLPLCF chrX@1117   | 1.41E-11 | 8.06E-04 |
| 8Mar2011- | 3017  | 534.79  | 26.52867 | 2 K.ENPPQLC chr1@1079   | 3.68E-10 | 0.005177 |
| 8Mar2011- | 2826  | 534.79  | 26.52867 | 2 K.ENPPQLC chr1@1079   | 4.98E-11 | 0.001813 |
| 8Mar2011- | 14971 | 883.46  | 22.3502  | 3 R.WKDREX Splice@chr   | 2.11E-10 | 0.004626 |
| 8Mar2011- | 8039  | 568.31  | -16.2042 | 2 R.KSFPSKQ Splice@chr  | 3.53E-10 | 0.009079 |
| 8Mar2011- | 2687  | 831.43  | -6.72788 | 2 _KFYGNNG chr5@1040    | 8.87E-11 | 0.003001 |
| 8Mar2011- | 5071  | 570.31  | 14.04477 | 2 R.QARQAF chr3@3621    | 3.90E-10 | 0.005272 |
| 8Mar2011- | 17031 | 769.39  | -3.25822 | 1 K.VGSNYTK Splice@chr  | 1.35E-10 | 0.00294  |
| 8Mar2011- | 833   | 539.28  | 25.2868  | 2 R.QMIGSEI chr3@1149   | 7.22E-10 | 0.009295 |
| 8Mar2011- | 17445 | 961.46  | -8.23263 | 2 R.FYFLFSDI chrX@2323  | 2.00E-10 | 0.006972 |
| 8Mar2011- | 20732 | 671.33  | -3.59769 | 2 K.M+15.99 chr4@1324   | 3.64E-10 | 0.008646 |
| 8Mar2011- | 322   | 661.35  | 22.68348 | 1 R.DLGNGG Splice@chr   | 4.28E-10 | 0.009818 |
| 8Mar2011- | 4907  | 481.93  | -17.3444 | 3 K.NEKKTCL chr3@4728   | 2.42E-10 | 0.006333 |
| 8Mar2011- | 2884  | 481.93  | -17.3444 | 3 K.NEKKTCL chr3@4728   | 1.81E-10 | 0.004771 |
| 8Mar2011- | 17414 | 867.71  | 8.682755 | 4 R.WRFSSK Splice@chr   | 7.37E-11 | 0.001385 |
| 8Mar2011- | 20806 | 1164.96 | -3.68856 | 3 _LISQSFSF chr3@2466   | 3.94E-10 | 0.007864 |
| 8Mar2011- | 15253 | 1039.51 | -26.3175 | 3 R.KPESKSEI Splice@chr | 4.00E-10 | 0.008879 |
| 8Mar2011- | 3953  | 657.89  | 8.138104 | 2 K.FIQITHIS Splice@chr | 7.07E-11 | 0.003303 |
| 8Mar2011- | 2936  | 665.39  | 2.847902 | 2 K.FTKKQKC chrX@1692   | 1.55E-10 | 0.005106 |
| 8Mar2011- | 17773 | 931.47  | -29.1119 | 3 R.QRGRNV chrX@1444    | 4.95E-10 | 0.009574 |
| 8Mar2011- | 3348  | 498.27  | 8.653415 | 2 R.EIVATMC chr3@7292   | 6.15E-10 | 0.007498 |
| 8Mar2011- | 8518  | 550.34  | 4.839591 | 2 R.PQASLTV chr5@1695   | 8.39E-11 | 0.002789 |
| 8Mar2011- | 13890 | 539.04  | -27.6625 | 4 K.VTKM+15 chr4@7157   | 1.36E-10 | 0.004537 |
| 8Mar2011- | 65    | 762.84  | -14.7412 | 2 R.DSWM+1 chr3@1042    | 5.04E-10 | 0.009781 |
| 8Mar2011- | 7315  | 721.45  | 0.976439 | 2 R.RKK+14.C chr1@7116  | 2.54E-10 | 0.006435 |
| 8Mar2011- | 14564 | 789.17  | -21.3729 | 4 R.EKAEIHEI chr2@1279  | 5.56E-12 | 1.58E-04 |
| 8Mar2011- | 16470 | 909.22  | -0.47043 | 4 E.WIEICDIV chr4@4702  | 4.90E-11 | 0.00206  |
| 8Mar2011- | 2052  | 645.87  | 28.11136 | 2 R.RQPAAW Splice@chr   | 1.41E-10 | 0.003691 |
| 8Mar2011- | 11373 | 704.34  | -27.049  | 2 R.ENWK+1. Splice@chr  | 2.30E-10 | 0.005571 |
| 8Mar2011- | 17039 | 928.96  | -27.5586 | 2 _VFFKFSSK chr3@1058   | 2.48E-10 | 0.005046 |
| 8Mar2011- | 6681  | 903.56  | 9.4676   | 1 R.AIVSTATI chr4@8880  | 1.54E-10 | 0.003671 |
| 8Mar2011- | 17458 | 1163.55 | -24.1333 | 2 K.TFFFRSSS chr5@1579  | 7.79E-11 | 0.002639 |
| 8Mar2011- | 18825 | 976.57  | 29.1253  | 1 K.RMRSRN chr3@1217    | 3.87E-10 | 0.005272 |
| 8Mar2011- | 12114 | 1069.53 | -0.5419  | 2 R.KEKHDDI chr1@2866   | 3.74E-10 | 0.008489 |
| 8Mar2011- | 14759 | 672.35  | -8.96016 | 2 _LK+14.01 chr3@9637   | 4.38E-10 | 0.00576  |
| 8Mar2011- | 17722 | 790.41  | 3.176812 | 1 K.GVAVCQI chr5@3867   | 1.63E-10 | 0.00231  |
| 8Mar2011- | 2473  | 665.39  | -24.528  | 2 K.FSK+14.0 chr4@1157  | 1.20E-10 | 0.002788 |
| 8Mar2011- | 6410  | 600.63  | -18.3896 | 3 K.LSRHDGK chr4@1058   | 2.13E-10 | 0.00495  |
| 8Mar2011- | 52    | 544.36  | 15.61422 | 2 K.SRGDKKL chr1@1258   | 3.82E-10 | 0.008854 |
| 8Mar2011- | 12258 | 824.44  | 4.785166 | 2 K.DPMAQK chr4@1512    | 3.43E-10 | 0.008088 |
| 8Mar2011- | 18174 | 786.4   | 10.59257 | 4 K.MMGALS chr2@4083    | 7.68E-11 | 0.002359 |
| 8Mar2011- | 1579  | 457.57  | 6.684256 | 3 V.EAQKEAC chr5@9100   | 4.83E-10 | 0.009455 |
| 8Mar2011- | 1843  | 405.23  | -23.8079 | 2 K.SALPAPPI chr1@4277  | 4.50E-11 | 0.001345 |
| 8Mar2011- | 9409  | 576.29  | -2.175   | 2 R.DVANCCI chr4@7503   | 6.98E-11 | 0.002125 |

|           |       |         |          |                        |          |          |
|-----------|-------|---------|----------|------------------------|----------|----------|
| 8Mar2011- | 5113  | 686.42  | 24.82045 | 2 R.KNRK+14 chr1@1205  | 2.39E-10 | 0.006739 |
| 8Mar2011- | 15864 | 1101.08 | -28.7393 | 2 R.SYERLKL chr2@3515  | 1.02E-10 | 0.00318  |
| 8Mar2011- | 20191 | 1069.11 | 24.15609 | 2 R.CAIYRNE chr3@3742  | 3.27E-10 | 0.00748  |
| 8Mar2011- | 3492  | 409.24  | 18.31542 | 2 K.FVGNVPC chr4@1724  | 4.60E-10 | 0.009086 |
| 8Mar2011- | 10634 | 553.3   | 0.499703 | 2 K.FFFAIFGC chr1@5032 | 3.04E-10 | 0.005613 |
| 8Mar2011- | 2656  | 414.98  | -6.48722 | 4 K.TQTHPT chr4@1394   | 3.72E-10 | 0.008973 |
| 8Mar2011- | 8566  | 588.81  | -15.056  | 2 R.LM+15.9 Splice@chr | 3.42E-10 | 0.006289 |
| 8Mar2011- | 1406  | 409.22  | -17.0448 | 3 R.K+14.016 chr1@9075 | 4.07E-10 | 0.009722 |
| 8Mar2011- | 4200  | 676.41  | -17.8023 | 2 _SRK+14.0 chr3@1265  | 1.39E-10 | 0.003466 |
| 8Mar2011- | 7972  | 1087.53 | 4.218998 | 1 R.HNFADP5 chr3@4587  | 2.23E-10 | 0.002939 |
| 8Mar2011- | 1883  | 472.28  | 16.70726 | 2 _PGVPSAL Splice@chr  | 3.16E-10 | 0.008625 |
| 8Mar2011- | 5696  | 479.29  | -27.4361 | 2 R.AEVSVVL Splice@chr | 3.34E-10 | 0.006876 |
| 8Mar2011- | 18097 | 740.01  | -24.9798 | 3 R.AIPNCFSt chr4@1022 | 1.54E-10 | 0.004183 |
| 8Mar2011- | 6089  | 1066.57 | -26.0842 | 1 K.YAGTAK+ chrX@2539  | 2.64E-11 | 5.36E-04 |
| 8Mar2011- | 18397 | 1038.56 | 14.6141  | 3 R.QWQHVL chr5@1286   | 1.15E-10 | 0.00357  |
| 8Mar2011- | 17915 | 918.48  | -16.3805 | 1 R.RRTAEER chr3@7309  | 2.16E-10 | 0.006213 |
| 8Mar2011- | 2869  | 488.29  | 9.770086 | 2 R.EIAFGVL Splice@chr | 2.67E-10 | 0.005558 |
| 8Mar2011- | 666   | 515.34  | 24.17534 | 2 R.KKIDGRR chr3@3245  | 9.39E-11 | 0.001129 |
| 8Mar2011- | 4956  | 502.32  | -27.4185 | 2 K.ITLTSKVL chr5@9301 | 2.80E-10 | 0.00703  |
| 8Mar2011- | 20545 | 1119.28 | 14.06846 | 3 R.KSIHMFN chr5@7074  | 1.16E-10 | 0.001989 |
| 8Mar2011- | 9846  | 559     | -22.5325 | 4 K.SPIPGAT chr4@2204  | 2.09E-10 | 0.005885 |
| 8Mar2011- | 14711 | 567.33  | 29.50526 | 2 R.GGLWSA Splice@chr  | 1.90E-10 | 0.005249 |
| 8Mar2011- | 15698 | 833.47  | 7.719837 | 4 K.HYLENFR chr5@2002  | 1.96E-10 | 0.004111 |
| 8Mar2011- | 7249  | 492.31  | -24.7835 | 2 R.LVIVNGA Splice@chr | 3.78E-11 | 5.33E-04 |
| 8Mar2011- | 6588  | 772.39  | 26.72397 | 2 R.HNFLPTV chr1@1158  | 3.34E-10 | 0.007155 |
| 8Mar2011- | 14624 | 815.44  | -13.4589 | 2 _LISLICKFL chr5@1375 | 1.02E-10 | 0.002735 |
| 8Mar2011- | 4797  | 666.87  | 24.72412 | 2 R.EHVK+14 chr5@4189  | 3.50E-11 | 0.001165 |
| 8Mar2011- | 14490 | 932.23  | -15.0618 | 4 K.KCRKFSIP chr1@2978 | 2.59E-10 | 0.006435 |
| 8Mar2011- | 18649 | 760.09  | 16.11641 | 3 K.YYRGFDT Splice@chr | 2.45E-10 | 0.007659 |
| 8Mar2011- | 18652 | 1016.5  | 21.39749 | 2 _KQFSITDI chr4@1490  | 1.09E-10 | 0.004032 |
| 8Mar2011- | 14654 | 942.96  | -24.5368 | 2 S.K+14.016 chr5@7768 | 5.25E-10 | 0.009406 |
| 8Mar2011- | 16617 | 942.46  | -22.7551 | 2 S.K+14.016 chr5@7768 | 3.04E-10 | 0.009433 |
| 8Mar2011- | 7781  | 460.25  | 15.08484 | 2 R.EMRASGI chr3@8660  | 5.69E-11 | 0.001817 |
| 8Mar2011- | 16637 | 1096.61 | -21.0384 | 2 R.VRHDK+1 chr2@5945  | 3.08E-10 | 0.008914 |
| 8Mar2011- | 16836 | 932.07  | 14.66066 | 2 _KIDSFQK Splice@chr  | 3.47E-10 | 0.008051 |
| 8Mar2011- | 1475  | 633.34  | -0.09328 | 1 R.NSAAAAI chrX@1291  | 4.12E-10 | 0.007602 |
| 8Mar2011- | 17916 | 1002.53 | -8.01681 | 2 _GRIEFLN chr3@8225   | 2.22E-10 | 0.006492 |
| 8Mar2011- | 9440  | 610.35  | -1.26876 | 3 R.IVMRARC Splice@chr | 1.36E-10 | 0.004093 |
| 8Mar2011- | 19710 | 1004    | -28.6438 | 2 K.LYTSYKCS chr2@1489 | 1.81E-10 | 0.004685 |
| 8Mar2011- | 16091 | 760.43  | -17.4468 | 3 K.CEINFLN chr3@3260  | 4.64E-10 | 0.00949  |
| 8Mar2011- | 10828 | 865.44  | 0.070607 | 2 R.VEESHGA chr1@3131  | 2.46E-10 | 0.006959 |
| 8Mar2011- | 2894  | 442.27  | 27.94132 | 2 R.AGMPPG chr4@1319   | 3.55E-10 | 0.008421 |
| 8Mar2011- | 17114 | 846.44  | -6.06426 | 3 R.KNEHKM chrX@5844   | 2.66E-10 | 0.007448 |
| 8Mar2011- | 14570 | 933.5   | -22.7666 | 4 R.KTNKKRC chr3@6186  | 8.31E-11 | 0.002915 |
| 8Mar2011- | 14776 | 902.49  | -22.2069 | 2 K.NK+14.0 chr4@1599  | 3.57E-10 | 0.008117 |
| 8Mar2011- | 2496  | 410.25  | 13.81537 | 2 K.FSGGIPLk chr4@1557 | 1.87E-10 | 0.005337 |
| 8Mar2011- | 2452  | 410.25  | 13.81537 | 2 K.FSGGIPLk chr4@1557 | 2.86E-10 | 0.006908 |

|           |       |         |          |                          |          |          |
|-----------|-------|---------|----------|--------------------------|----------|----------|
| 8Mar2011- | 7201  | 822.45  | -28.3084 | 2 A.RYTVFSKl chr3@239    | 3.20E-10 | 0.007155 |
| 8Mar2011- | 14208 | 888.48  | 3.169623 | 1 K.TYHTIPR. chr4@124    | 2.50E-10 | 0.005854 |
| 8Mar2011- | 1340  | 413.25  | -26.457  | 2 R.K+14.016 chr5@112    | 3.00E-10 | 0.008193 |
| 8Mar2011- | 6909  | 499.27  | 0.367488 | 2 K.TLGISSTY chrX@950    | 4.34E-10 | 0.009807 |
| 8Mar2011- | 5720  | 499.26  | -19.6606 | 2 K.TLGISSTY chrX@950    | 3.82E-10 | 0.006828 |
| 8Mar2011- | 1650  | 548.74  | -10.0288 | 2 _ESTEM+1 chr3@210      | 1.48E-11 | 8.63E-04 |
| 8Mar2011- | 8705  | 679.35  | 16.28609 | 2 K.LHGCFHF chrX@114     | 3.10E-10 | 0.009106 |
| 8Mar2011- | 6146  | 549.27  | -24.4908 | 2 R.DKSTAGY chrX@193     | 2.23E-11 | 9.26E-04 |
| 8Mar2011- | 11607 | 544.36  | 8.200212 | 2 _IIWPFK+1 chrX@713     | 3.77E-10 | 0.008942 |
| 8Mar2011- | 103   | 453.21  | -20.8737 | 2 R.FSPHSSSI Splice@chr  | 3.22E-10 | 0.008486 |
| 8Mar2011- | 9399  | 865.85  | -27.0082 | 2 L.RCFAFGQ Splice@chr   | 1.52E-11 | 4.19E-04 |
| 8Mar2011- | 18422 | 1012.56 | 15.31177 | 3 R.SISSRKEIF Splice@chr | 1.90E-11 | 7.74E-04 |
| 8Mar2011- | 7888  | 1039.5  | -9.7562  | 1 K.K+14.016 chrX@924    | 1.77E-10 | 0.004771 |
| 8Mar2011- | 6308  | 544.31  | 11.23424 | 2 R.ESINSIISP Splice@chr | 1.79E-10 | 0.0023   |
| 8Mar2011- | 4930  | 878.44  | 28.10348 | 1 R.ESNKNM chrX@945      | 2.44E-10 | 0.006666 |
| 8Mar2011- | 19356 | 1042.56 | -24.6773 | 3 R.FFLSSKM chr4@146     | 5.00E-10 | 0.009457 |
| 8Mar2011- | 2707  | 685.35  | -1.69457 | 2 R.FFFKSTGI chr1@344    | 1.85E-10 | 0.005213 |
| 8Mar2011- | 7524  | 1049.54 | -9.61172 | 1 K.YAAKYAF chr1@121     | 1.65E-10 | 0.005281 |
| 8Mar2011- | 3108  | 473.94  | -7.70427 | 3 K.K+14.016 chr3@131    | 2.29E-10 | 0.00346  |
| 8Mar2011- | 1953  | 472.29  | 3.453578 | 3 K.QQKGTIS chr3@701     | 5.54E-11 | 0.001944 |
| 8Mar2011- | 19412 | 1062.6  | 17.70846 | 2 K.VRKQFF chr2@387      | 8.07E-11 | 0.001805 |
| 8Mar2011- | 13262 | 835.7   | 25.25457 | 4 R.FQQM+1 chr1@172      | 1.79E-10 | 0.005336 |
| 8Mar2011- | 17586 | 988.05  | 16.1798  | 2 K.IPRCFMP chr3@114     | 2.10E-10 | 0.004871 |
| 8Mar2011- | 991   | 489.72  | -19.0627 | 2 K.NSEKSPC chrX@127     | 4.86E-10 | 0.00925  |
| 8Mar2011- | 6146  | 704.35  | -20.3058 | 2 K.QNFLNAI chrX@174     | 1.38E-10 | 0.006707 |
| 8Mar2011- | 5232  | 504.76  | -14.3574 | 2 K.SVVNFTV chr5@219     | 4.55E-10 | 0.00967  |
| 8Mar2011- | 7368  | 504.76  | -14.3574 | 2 K.SVVNFTV chr5@219     | 4.74E-10 | 0.009455 |
| 8Mar2011- | 17645 | 881.47  | -28.9294 | 3 _NSVTLIQI Splice@chr   | 3.60E-10 | 0.008554 |
| 8Mar2011- | 14544 | 1110.6  | -24.6425 | 2 K.MEKSAKI chr2@764     | 1.33E-11 | 0.001033 |
| 8Mar2011- | 20589 | 1046.55 | -14.8274 | 2 R.YFLTQW/ chr5@214     | 3.56E-10 | 0.00815  |
| 8Mar2011- | 543   | 573.34  | 12.69066 | 2 R.KKMGEQ chr1@752      | 4.78E-11 | 0.00206  |
| 8Mar2011- | 7818  | 446.26  | -5.00663 | 2 K.ISGMKIN Splice@chr   | 5.40E-10 | 0.009406 |
| 8Mar2011- | 3056  | 733.36  | 5.260665 | 1 R.GSSPGDA chr4@742     | 4.35E-11 | 0.001447 |
| 8Mar2011- | 113   | 619.31  | -10.9571 | 2 R.ENSX+14 chr2@213     | 6.30E-11 | 0.001757 |
| 8Mar2011- | 15617 | 665.35  | -11.6113 | 3 R.KTPSSIAC Splice@chr  | 3.90E-10 | 0.009072 |
| 8Mar2011- | 16242 | 1041.04 | -17.1139 | 2 R.QRWWLFI chr4@472     | 1.31E-10 | 0.003129 |
| 8Mar2011- | 17916 | 996.87  | -8.15336 | 3 K.YGK+14.( chr3@134    | 1.33E-10 | 0.003831 |
| 8Mar2011- | 7098  | 479.29  | -5.35973 | 2 R.VVELALV Splice@chr   | 2.52E-10 | 0.006947 |
| 8Mar2011- | 17346 | 969.51  | -3.59264 | 3 R.FKNGK+1 Splice@chr   | 2.02E-10 | 0.005844 |
| 8Mar2011- | 19857 | 974.59  | 27.75709 | 2 R.FEFIIYIVI chr5@107   | 1.26E-10 | 0.004609 |
| 8Mar2011- | 8238  | 560.32  | -26.0472 | 2 R.ARKSTMI chr4@144     | 1.76E-10 | 0.004024 |
| 8Mar2011- | 17367 | 1048.86 | -28.0247 | 3 L.M+15.99! chr2@114    | 2.68E-10 | 0.006983 |
| 8Mar2011- | 300   | 507.78  | 0.361317 | 2 K.QKLHTTN chr4@127     | 2.54E-11 | 0.001285 |
| 8Mar2011- | 17028 | 772.41  | 8.96728  | 3 R.FYQISSIFI Splice@chr | 3.17E-10 | 0.007155 |
| 8Mar2011- | 19361 | 714.39  | 24.16478 | 1 _VGSGHTF chr1@565      | 2.24E-10 | 0.004951 |
| 8Mar2011- | 16621 | 959.48  | 9.972302 | 2 K.NACFLSN Splice@chr   | 2.21E-10 | 0.00558  |
| 8Mar2011- | 4460  | 418.22  | 8.737601 | 3 K.KRSGK+1 chr4@711     | 3.21E-10 | 0.007948 |

|           |       |         |          |                          |          |          |
|-----------|-------|---------|----------|--------------------------|----------|----------|
| 8Mar2011- | 10030 | 643.87  | 7.785373 | 2 K.LLRQEHS Splice@chr   | 3.22E-10 | 0.0082   |
| 8Mar2011- | 18989 | 948.46  | -23.1052 | 2 R.KLCFLVDI chr3@8001   | 7.15E-11 | 0.002245 |
| 8Mar2011- | 7398  | 597.3   | -1.38119 | 2 K.NWWPSI chr1@2154     | 3.71E-10 | 0.006866 |
| 8Mar2011- | 16858 | 958.5   | -21.4598 | 2 K.FAK+14.C chr2@1105   | 1.96E-10 | 0.005327 |
| 8Mar2011- | 13516 | 690.85  | -20.4954 | 2 R.SSIVNQN Splice@chr   | 6.04E-10 | 0.007498 |
| 8Mar2011- | 22387 | 1094.07 | -21.2183 | 2 K.FFSRKLSN chr5@1735   | 3.21E-10 | 0.007392 |
| 8Mar2011- | 1185  | 505.28  | -19.8495 | 2 _FLPTGSFL chr5@2201    | 1.06E-10 | 0.0055   |
| 8Mar2011- | 9431  | 478.81  | 27.30446 | 2 K.NLLVSSIP chr5@2285   | 3.90E-10 | 0.00693  |
| 8Mar2011- | 12569 | 921.99  | 11.70465 | 2 R.KFDKKQL chr1@1191    | 3.94E-10 | 0.008332 |
| 8Mar2011- | 13751 | 844.43  | -26.8471 | 2 R.RRCMRSI chr3@1187    | 2.95E-10 | 0.008411 |
| 8Mar2011- | 1673  | 747.37  | -17.5206 | 1 K.KGGGGG chrX@1484     | 1.49E-10 | 0.004427 |
| 8Mar2011- | 4313  | 506.26  | -10.3284 | 2 _KMMMMM chr1@3401      | 3.40E-10 | 0.004688 |
| 8Mar2011- | 2000  | 565.3   | -14.1041 | 3 K.WFCTK+1 chrX@1035    | 1.31E-10 | 0.003921 |
| 8Mar2011- | 1294  | 525.32  | 2.041178 | 2 R.KKATALN chr3@1305    | 3.65E-10 | 0.006866 |
| 8Mar2011- | 17909 | 962.02  | 8.25654  | 2 R.EPK+14.C Splice@chr  | 2.69E-10 | 0.00837  |
| 8Mar2011- | 20141 | 845.43  | -5.60376 | 2 K.YRWTTV chr5@1082     | 4.93E-10 | 0.009457 |
| 8Mar2011- | 7207  | 1018.51 | 5.132353 | 2 C.QREEIEY Splice@chr   | 3.48E-10 | 0.009268 |
| 8Mar2011- | 17432 | 1012.02 | 22.44028 | 2 R.NYQRQF Splice@chr    | 4.44E-11 | 0.00155  |
| 8Mar2011- | 1693  | 472.3   | -26.8502 | 3 K.KK+14.01 chr4@3128   | 2.98E-11 | 0.001473 |
| 8Mar2011- | 12400 | 731.89  | -24.1904 | 2 I.NKM+15.1 chr2@1321   | 4.62E-10 | 0.009849 |
| 8Mar2011- | 20977 | 839.93  | 14.76933 | 2 K.FKICCFQ chr1@7041    | 6.53E-11 | 0.002747 |
| 8Mar2011- | 397   | 586.32  | -26.2459 | 2 R.PK+14.01 Splice@chr  | 4.54E-10 | 0.008909 |
| 8Mar2011- | 15332 | 1175.62 | 14.41099 | 3 R.REWYLIH Splice@chr   | 2.00E-10 | 0.004883 |
| 8Mar2011- | 18169 | 630.13  | -19.9462 | 5 K.MENK+14 chr5@1004    | 1.64E-10 | 0.004816 |
| 8Mar2011- | 17674 | 630.13  | -24.758  | 5 R.NK+14.0 chrX@1602    | 2.55E-10 | 0.00649  |
| 8Mar2011- | 16038 | 577.3   | -25.6079 | 3 R.MK+14.0 chr3@5364    | 1.61E-10 | 0.004924 |
| 8Mar2011- | 8676  | 582.32  | -6.0897  | 2 K.IICCAK+1 chr5@1197   | 1.46E-10 | 0.007138 |
| 8Mar2011- | 5401  | 451.27  | -4.47502 | 3 R.KEAHIIRN chr5@9935   | 6.18E-11 | 0.001838 |
| 8Mar2011- | 11930 | 683.43  | 22.18136 | 2 K.LLLVHGS chr1@7088    | 3.02E-10 | 0.007986 |
| 8Mar2011- | 1279  | 693.36  | -8.51162 | 2 R.LHYVFFH Splice@chr   | 2.73E-10 | 0.007587 |
| 8Mar2011- | 14849 | 991.07  | 10.04869 | 2 K.K+14.016 chr1@1407   | 1.21E-10 | 0.002903 |
| 8Mar2011- | 16023 | 991.07  | 10.04869 | 2 K.K+14.016 chr1@1407   | 9.82E-11 | 0.00175  |
| 8Mar2011- | 21417 | 1133.12 | -24.3679 | 2 _IFYTLILLC chr3@1322   | 3.27E-10 | 0.006814 |
| 8Mar2011- | 8134  | 603.78  | -1.72137 | 2 R.FPYAHEE chr5@1177    | 1.17E-10 | 0.002351 |
| 8Mar2011- | 1092  | 506.26  | 14.91919 | 2 _HQASGA Splice@chr     | 4.38E-10 | 0.009896 |
| 8Mar2011- | 910   | 506.26  | 14.91919 | 2 _HQASGA Splice@chr     | 8.68E-11 | 9.97E-04 |
| 8Mar2011- | 13677 | 927.47  | 28.23025 | 1 R.ETCYVVR chr4@1144    | 2.19E-10 | 0.005165 |
| 8Mar2011- | 3888  | 830.44  | -26.932  | 1 R.EIGAALEI chr2@2868   | 8.98E-11 | 0.002883 |
| 8Mar2011- | 19192 | 868.01  | -11.5858 | 2 K.KIATQRLI chr5@1181   | 3.01E-10 | 0.007103 |
| 8Mar2011- | 5269  | 717.38  | 10.58277 | 1 R.GGELNAF chrX@4045    | 4.92E-10 | 0.009457 |
| 8Mar2011- | 20076 | 1044.51 | -5.73205 | 2 P.YWK+14. Splice@chr   | 4.01E-10 | 0.008426 |
| 8Mar2011- | 14299 | 988.24  | 19.61974 | 4 K.DQDRLG chr3@2805     | 2.96E-10 | 0.005613 |
| 8Mar2011- | 17616 | 969.49  | -28.4849 | 2 K.MCKKCAI chr3@1805    | 8.17E-11 | 0.001669 |
| 8Mar2011- | 284   | 451.27  | 2.377245 | 2 K.KSVSPNL chrX@6592    | 2.47E-10 | 0.006075 |
| 8Mar2011- | 6630  | 884.75  | 21.82484 | 3 _DGKSIFRI chr1@1195    | 1.07E-10 | 0.003914 |
| 8Mar2011- | 9460  | 554.36  | 5.115011 | 3 _IEIHK+14.1 Splice@chr | 3.28E-10 | 0.005941 |
| 8Mar2011- | 17502 | 766.98  | -0.4781  | 2 _IWK+14.1 chr3@8731    | 3.06E-10 | 0.008757 |

|           |       |         |          |                          |          |          |
|-----------|-------|---------|----------|--------------------------|----------|----------|
| 8Mar2011- | 16706 | 898.45  | -20.1146 | 3 _..VIHHCDA Splice@chr  | 6.41E-11 | 0.001832 |
| 8Mar2011- | 16970 | 959.01  | 26.24957 | 2 K.DFEIELHN chr5@1238   | 2.25E-10 | 0.009968 |
| 8Mar2011- | 13278 | 965.49  | -23.0136 | 2 C.IFLEFEVK chr4@1169   | 1.97E-10 | 0.004259 |
| 8Mar2011- | 20226 | 1036.53 | -24.6638 | 3 _..RRKFTELF chrX@1187  | 1.23E-10 | 0.003253 |
| 8Mar2011- | 2511  | 422.23  | -22.5718 | 3 K.RGNMVA chr1@6179     | 1.31E-10 | 0.003705 |
| 8Mar2011- | 14968 | 1101.56 | 7.209678 | 2 K.EIMDLGV gi 3929262   | 1.20E-17 | 0        |
| 8Mar2011- | 19131 | 1170.55 | 25.71481 | 2 R.ECKSSVY chr3@1370    | 2.74E-10 | 0.006679 |
| 8Mar2011- | 12697 | 1032.87 | -3.29307 | 3 K.MLQK+14 chrX@1963    | 6.55E-11 | 8.66E-04 |
| 8Mar2011- | 16334 | 1128.57 | 10.17658 | 1 R.AHTNIGT chr5@9337    | 2.00E-10 | 0.005885 |
| 8Mar2011- | 15249 | 1128.57 | 10.17658 | 1 R.AHTNIGT chr5@9337    | 1.06E-10 | 0.003744 |
| 8Mar2011- | 12056 | 548.64  | -23.3804 | 3 R.NLNFKKL chr5@9341    | 2.63E-10 | 0.00576  |
| 8Mar2011- | 13034 | 1114    | -15.2084 | 3 L.GKGLKNN chr5@2959    | 3.57E-10 | 0.007148 |
| 8Mar2011- | 2742  | 685.43  | -14.8572 | 2 R.QRLLLK+ chr4@8857    | 7.71E-11 | 0.0023   |
| 8Mar2011- | 4735  | 459.77  | 13.12161 | 2 R.RTAVDLS chr2@3969    | 1.12E-10 | 0.003134 |
| 8Mar2011- | 4236  | 459.77  | 13.12161 | 2 R.RTAVDLS chr2@3969    | 4.70E-10 | 0.009455 |
| 8Mar2011- | 15596 | 911.52  | 18.62104 | 3 _..FFIRRK+1 Splice@chr | 2.55E-10 | 0.006947 |
| 8Mar2011- | 420   | 479.26  | 3.471311 | 5 K.PHQGQFI chrX@1653    | 2.40E-10 | 0.004934 |
| 8Mar2011- | 16689 | 1096.6  | -23.268  | 2 R.RPLWPPC chr4@1160    | 3.98E-11 | 0.001678 |
| 8Mar2011- | 13655 | 1081.55 | 8.506108 | 2 K.SLNSTSLN chr4@1484   | 1.56E-10 | 0.003392 |
| 8Mar2011- | 4816  | 573.4   | 19.26615 | 2 K.VITSKK+1 chr3@9779   | 3.40E-11 | 5.34E-04 |
| 8Mar2011- | 19333 | 958.51  | 22.92968 | 2 L.LYACMCV chr5@1046    | 2.82E-10 | 0.005943 |
| 8Mar2011- | 9096  | 901.92  | 21.65926 | 2 S.YLCQFNS chr2@6119    | 2.05E-10 | 0.005903 |
| 8Mar2011- | 13685 | 1035.53 | -26.0253 | 3 R.WK+14.0 chr2@1809    | 2.42E-10 | 0.006714 |
| 8Mar2011- | 9083  | 479.29  | -22.8567 | 3 _..FNIFRIK+ chr4@5117  | 2.73E-10 | 0.006732 |
| 8Mar2011- | 17467 | 1096.6  | 13.18254 | 2 C.HYLK+14 Splice@chr   | 2.47E-10 | 0.007659 |
| 8Mar2011- | 13995 | 1086.86 | -25.0946 | 3 Q.RQLHARI Splice@chr   | 4.59E-10 | 0.008072 |
| 8Mar2011- | 13819 | 865.46  | -4.06092 | 2 K.TRFHRER chrX@1262    | 2.05E-10 | 0.009284 |
| 8Mar2011- | 702   | 487.29  | 4.141974 | 2 K.LSNGSAA chr1@1419    | 3.51E-10 | 0.007972 |
| 8Mar2011- | 3416  | 459.27  | -24.2185 | 4 K.FQKSPAR chr3@1216    | 2.49E-10 | 0.006407 |
| 8Mar2011- | 325   | 632.37  | -23.5561 | 2 K.QLKFSK+ chr3@2298    | 2.13E-10 | 0.009637 |
| 8Mar2011- | 19497 | 851.92  | -7.15641 | 4 _..K+14.016 chr3@5283  | 4.29E-10 | 0.00964  |
| 8Mar2011- | 18327 | 1094.62 | 14.43485 | 2 K.RCREK+1 chr3@1006    | 1.15E-10 | 0.003792 |
| 8Mar2011- | 16836 | 1061.6  | -26.2239 | 2 S.FKIMCPK chr4@5606    | 3.82E-10 | 0.009876 |
| 8Mar2011- | 21321 | 970.51  | 26.72357 | 1 R.RWEWHF chr5@9989     | 4.00E-10 | 0.008065 |
| 8Mar2011- | 15335 | 970     | 2.960458 | 2 R.VLYYTWT chr1@9228    | 3.87E-11 | 0.001755 |
| 8Mar2011- | 17661 | 981     | -26.824  | 2 K.MPK+14. chr2@9628    | 2.42E-10 | 0.005598 |
| 8Mar2011- | 4078  | 474.25  | 15.73488 | 2 R.WLMAQT Splice@chr    | 2.37E-10 | 0.003329 |
| 8Mar2011- | 2191  | 677.37  | -10.8803 | 2 K.KICFLCEK chr5@2024   | 2.28E-10 | 0.006122 |
| 8Mar2011- | 4115  | 440.24  | -5.42311 | 2 _..DNKFINK Splice@chr  | 4.23E-10 | 0.009307 |
| 8Mar2011- | 9176  | 913.45  | -20.4218 | 1 R.DKMFFPT chrX@1172    | 2.60E-10 | 0.006281 |
| 8Mar2011- | 7798  | 708.37  | -1.25051 | 2 K.MHFFTRT chr1@1104    | 1.67E-10 | 0.007473 |
| 8Mar2011- | 9290  | 716.37  | -21.671  | 2 K.IM+15.99 Splice@chr  | 1.59E-10 | 0.004101 |
| 8Mar2011- | 7474  | 716.37  | -21.671  | 2 K.IM+15.99 Splice@chr  | 1.52E-10 | 0.003076 |
| 8Mar2011- | 2741  | 831.43  | 27.12185 | 1 K.FMYSVGT chr3@1157    | 1.50E-10 | 0.004427 |
| 8Mar2011- | 5277  | 451.25  | -12.7425 | 3 _..MCLSVTL chrX@1559   | 6.51E-11 | 0.002747 |
| 8Mar2011- | 17250 | 1110.01 | -24.4354 | 2 K.LVIM+15 chrX@1176    | 2.96E-10 | 0.005613 |
| 8Mar2011- | 17213 | 823.08  | -21.8605 | 3 K.FETKIHRK chr1@1316   | 4.69E-11 | 0.001482 |

|           |       |         |          |                         |          |          |
|-----------|-------|---------|----------|-------------------------|----------|----------|
| 8Mar2011- | 14241 | 789.4   | -25.3148 | 2 K.SSKETLKS chr5@3019  | 3.85E-10 | 0.006828 |
| 8Mar2011- | 11376 | 970.55  | -24.0901 | 2 K.IMKIWNI chr5@1723   | 3.86E-10 | 0.008854 |
| 8Mar2011- | 7822  | 578.31  | 18.74915 | 4 K.KLQDFDS chrX@1287   | 3.22E-10 | 0.006004 |
| 8Mar2011- | 6373  | 556.8   | -16.4722 | 2 R.HFDGSLI chr4@1129   | 2.24E-10 | 0.004951 |
| 8Mar2011- | 19062 | 1110.57 | -15.9309 | 2 T.QCVESII Splice@chr  | 2.52E-10 | 0.006983 |
| 8Mar2011- | 12497 | 1178.59 | -18.0368 | 1 K.ERPFHFG chr1@1490   | 2.29E-10 | 0.004489 |
| 8Mar2011- | 17478 | 1066.6  | 6.791712 | 2 K.KKFFFSI chr2@1276   | 2.00E-10 | 0.005436 |
| 8Mar2011- | 2408  | 464.21  | -6.32482 | 2 K.MICAYGC chr2@7637   | 8.12E-11 | 0.002224 |
| 8Mar2011- | 18577 | 1035.54 | -4.54359 | 3 K.EKKRDTL chr4@4908   | 2.77E-10 | 0.005943 |
| 8Mar2011- | 1326  | 403.88  | 16.05926 | 3 K.QNCAIYL chrX@8104   | 4.42E-10 | 0.008615 |
| 8Mar2011- | 2502  | 451.73  | -3.79164 | 2 K.GRERGD chrX@1621    | 3.80E-10 | 0.008332 |
| 8Mar2011- | 8839  | 661.37  | -2.17205 | 2 R.LESFAAQ chr2@6828   | 1.60E-10 | 0.005168 |
| 8Mar2011- | 18355 | 941.01  | -4.9687  | 2 R.K+14.016 chr2@7241  | 1.76E-10 | 0.005136 |
| 8Mar2011- | 15119 | 678.37  | -4.37183 | 2 _PCWFKV chrX@5415     | 3.95E-10 | 0.008426 |
| 8Mar2011- | 14109 | 1034.51 | -20.8852 | 2 K.TK+14.01 chrX@2659  | 9.40E-11 | 0.00205  |
| 8Mar2011- | 13108 | 681.08  | -15.1672 | 4 _INYNLEA Splice@chr   | 3.54E-10 | 0.006497 |
| 8Mar2011- | 4378  | 462.25  | 7.553282 | 2 R.RSSSSRF chr4@2998   | 3.88E-10 | 0.00922  |
| 8Mar2011- | 18164 | 689.85  | -18.3085 | 2 _RRSNENL chr5@1335    | 3.34E-10 | 0.008019 |
| 8Mar2011- | 268   | 1000.48 | 12.28918 | 1 K.MAFCESL chr5@4406   | 1.18E-10 | 0.002655 |
| 8Mar2011- | 11601 | 688.4   | -26.4594 | 2 K.KTFRIRSS chr2@4115  | 2.20E-10 | 0.006168 |
| 8Mar2011- | 10666 | 673.36  | -10.9841 | 2 R.SSLPWN Splice@chr   | 2.86E-10 | 0.007276 |
| 8Mar2011- | 16446 | 1121.98 | -21.8878 | 2 T.YYQQFVY chr2@1174   | 1.93E-10 | 0.005143 |
| 8Mar2011- | 6313  | 504.32  | -4.24433 | 2 K.VHLAGG chr2@8466    | 4.24E-10 | 0.008419 |
| 8Mar2011- | 2153  | 470.3   | 19.44404 | 2 K.ARIHTTK chr5@9108   | 2.05E-10 | 0.005005 |
| 8Mar2011- | 11866 | 845.94  | -15.7474 | 2 R.RPLYSVA chr5@1672   | 1.79E-10 | 0.005168 |
| 8Mar2011- | 34    | 421.26  | -9.37618 | 2 _RAPGGR chr1@9832     | 1.77E-10 | 0.004062 |
| 8Mar2011- | 19    | 421.26  | -9.37618 | 2 _RAPGGR chr1@9832     | 7.44E-10 | 0.009772 |
| 8Mar2011- | 20    | 421.26  | -9.37618 | 2 _RAPGGR chr1@9832     | 2.05E-10 | 0.002816 |
| 8Mar2011- | 12838 | 656.44  | 27.19236 | 2 K.EVVVDVF chr4@4634   | 2.27E-10 | 0.009968 |
| 8Mar2011- | 16762 | 789.9   | 24.42715 | 2 Q.KFM+15. chr2@1256   | 3.98E-10 | 0.008642 |
| 8Mar2011- | 14347 | 1078.55 | -7.22429 | 2 R.WDLKEDI Splice@chr  | 2.24E-10 | 0.005427 |
| 8Mar2011- | 15732 | 692.42  | -8.20961 | 2 R.ATKVVT chr5@4991    | 2.41E-10 | 0.00639  |
| 8Mar2011- | 8050  | 1149.57 | -28.1181 | 3 R.CQIANRL chrX@3321   | 3.45E-10 | 0.009414 |
| 8Mar2011- | 11354 | 567.3   | 8.470226 | 2 K.WDELKQ Splice@chr   | 3.40E-10 | 0.009788 |
| 8Mar2011- | 2492  | 549.31  | 24.12466 | 2 _IMASIRYI chr1@9116   | 2.70E-10 | 0.006606 |
| 8Mar2011- | 2993  | 586.37  | -17.5169 | 2 K.GVVRAS chr5@1742    | 2.74E-10 | 0.006299 |
| 8Mar2011- | 1864  | 531.3   | 7.481375 | 2 K.EKSVDSV Splice@chr  | 1.94E-10 | 0.005028 |
| 8Mar2011- | 8794  | 729.4   | 8.463301 | 2 R.WMEGA chr2@7775     | 1.32E-10 | 0.003253 |
| 8Mar2011- | 14079 | 1149.56 | 11.58486 | 2 K.RTNPSNF chr2@2964   | 2.90E-10 | 0.00512  |
| 8Mar2011- | 15497 | 930.49  | -6.10688 | 2 R.KMKIMEI Splice@chr  | 1.90E-10 | 0.004293 |
| 8Mar2011- | 6276  | 835.47  | -14.4821 | 2 K.LQTSM+1 chr3@1213   | 4.01E-11 | 0.001536 |
| 8Mar2011- | 12223 | 754.14  | 3.808977 | 4 R.TEKLQKIS chr2@5029  | 3.85E-11 | 3.34E-04 |
| 8Mar2011- | 2068  | 472.76  | -4.46358 | 2 K.IGAAEITN chr5@3246  | 2.72E-10 | 0.007412 |
| 8Mar2011- | 9166  | 570.3   | 3.323594 | 2 _M+15.99 chrX@6809    | 4.17E-10 | 0.009099 |
| 8Mar2011- | 12863 | 842.92  | -26.9463 | 2 R.QM+15.9 chr1@1151   | 2.58E-10 | 0.009622 |
| 8Mar2011- | 19670 | 749.76  | 23.91188 | 3 K.INLKL PET chr4@1278 | 3.89E-10 | 0.008332 |
| 8Mar2011- | 19626 | 712.38  | -27.1976 | 1 R.AAAPSGF Splice@chr  | 7.27E-12 | 5.64E-04 |

|           |       |         |          |                         |          |          |
|-----------|-------|---------|----------|-------------------------|----------|----------|
| 8Mar2011- | 17625 | 712.38  | -27.1976 | 1 R.AAAPSGF Splice@chr  | 7.27E-12 | 0        |
| 8Mar2011- | 17637 | 712.41  | 14.92865 | 1 R.AAAPSGF Splice@chr  | 5.84E-11 | 0.002196 |
| 8Mar2011- | 8509  | 935.47  | -19.2208 | 1 K.ETVKENS chr2@5532   | 5.10E-11 | 0.001813 |
| 8Mar2011- | 20052 | 1063.6  | 9.075583 | 2 R.RTLREND chr4@8782   | 3.94E-10 | 0.008332 |
| 8Mar2011- | 1198  | 403.22  | -29.4384 | 3 K.SNFSLKK- chr1@1192  | 1.23E-10 | 0.001515 |
| 8Mar2011- | 16674 | 802.42  | 13.63932 | 3 _NLNIWEN chr3@2519    | 4.45E-10 | 0.00796  |
| 8Mar2011- | 9572  | 478.27  | 21.28858 | 3 R.SFK+14.0 chr1@1230  | 3.09E-10 | 0.008155 |
| 8Mar2011- | 1853  | 603.31  | -19.0509 | 1 R.GGGGTV chr4@1916    | 4.32E-11 | 0.002086 |
| 8Mar2011- | 16362 | 929.71  | 7.708496 | 4 _SGVAIEN' Splice@chr  | 1.27E-10 | 0.003253 |
| 8Mar2011- | 16043 | 815.79  | -22.7721 | 3 _KTGRETIC chr5@1027   | 2.02E-10 | 0.004706 |
| 8Mar2011- | 14066 | 815.44  | -20.6575 | 2 _KNRKNVI chr3@1196    | 2.71E-10 | 0.007448 |
| 8Mar2011- | 14679 | 990.22  | -18.2518 | 4 _MAHNRT Splice@chr    | 2.72E-10 | 0.007412 |
| 8Mar2011- | 19421 | 827.89  | -18.3522 | 2 K.IKCCLHST chr5@1119  | 1.60E-10 | 0.002969 |
| 8Mar2011- | 17806 | 1010.52 | -17.692  | 2 _YWIFWQ chr1@3326     | 3.55E-10 | 0.008134 |
| 8Mar2011- | 2234  | 402.23  | 9.127468 | 2 _VVADLMI chr2@1246    | 4.74E-10 | 0.00915  |
| 8Mar2011- | 11917 | 942.51  | -24.1152 | 2 R.MKHCPPi chr1@9508   | 8.27E-11 | 0.001669 |
| 8Mar2011- | 11620 | 458.6   | 23.03138 | 3 K.IDENSEIT chr1@1191  | 2.89E-10 | 0.005943 |
| 8Mar2011- | 13168 | 677.61  | 5.437891 | 4 K.ESIVSVLT chrX@9696  | 2.42E-10 | 0.003714 |
| 8Mar2011- | 16043 | 1034.51 | -4.13395 | 2 R.RSEMEEE chrX@1289   | 3.13E-10 | 0.007155 |
| 8Mar2011- | 12048 | 595.32  | -19.5124 | 2 R.SRRVAGT chr2@1409   | 2.55E-10 | 0.006983 |
| 8Mar2011- | 3481  | 526.3   | 28.90439 | 2 K.QFTSPITT chr3@9392  | 1.99E-10 | 0.008253 |
| 8Mar2011- | 819   | 526.3   | 28.90439 | 2 K.QFTSPITT chr3@9392  | 3.19E-10 | 0.008486 |
| 8Mar2011- | 18565 | 947.5   | 27.79408 | 2 K.YK+14.01 chr2@1384  | 3.05E-10 | 0.007889 |
| 8Mar2011- | 2421  | 524.31  | -11.6141 | 2 R.KISNSKEI chr3@7109  | 1.54E-10 | 0.003695 |
| 8Mar2011- | 19016 | 1077.9  | -11.0925 | 3 _MLAEKLC chr5@1245    | 2.66E-10 | 0.007115 |
| 8Mar2011- | 4569  | 407.27  | 5.192217 | 2 R.IALTVAPt chrX@9310  | 1.12E-10 | 0.00357  |
| 8Mar2011- | 15319 | 1000.52 | -7.17761 | 2 K.DIEIQREF chr1@1331  | 3.41E-10 | 0.008965 |
| 8Mar2011- | 16186 | 909.47  | -20.4082 | 3 K.RNRCENI chr2@8978   | 2.15E-10 | 0.00526  |
| 8Mar2011- | 871   | 602.32  | 1.28571  | 3 R.VEINYFAi chr3@7208  | 4.08E-10 | 0.005272 |
| 8Mar2011- | 9293  | 547.29  | -22.4569 | 2 R.SLSSTSSR chr2@1445  | 3.48E-10 | 0.008217 |
| 8Mar2011- | 4836  | 547.29  | -22.4569 | 2 R.SLSSTSSR chr2@1445  | 2.04E-10 | 0.005844 |
| 8Mar2011- | 16326 | 1157.62 | -28.2039 | 3 S.CYPMAFc chrX@6458   | 1.96E-10 | 0.004541 |
| 8Mar2011- | 14865 | 754.14  | 10.29241 | 4 R.SIDNMP/ chr5@2477   | 2.38E-10 | 0.006792 |
| 8Mar2011- | 8668  | 1081.85 | 6.94867  | 3 R.ASVDTTA Splice@chr  | 6.31E-23 | 0        |
| 8Mar2011- | 9178  | 1081.85 | 6.94867  | 3 R.ASVDTTA Splice@chr  | 1.35E-25 | 0        |
| 8Mar2011- | 6834  | 1081.85 | 6.94867  | 3 R.ASVDTTA Splice@chr  | 1.63E-24 | 0        |
| 8Mar2011- | 8985  | 1081.85 | 6.94867  | 3 R.ASVDTTA Splice@chr  | 7.47E-22 | 0        |
| 8Mar2011- | 21480 | 965.98  | -3.28903 | 2 K.QNFISMIS chr4@6067  | 3.87E-10 | 0.007864 |
| 8Mar2011- | 3665  | 560.31  | 1.585689 | 2 K.LPFSGTAl chrX@1310  | 1.38E-10 | 0.003469 |
| 8Mar2011- | 11749 | 688.4   | -18.2909 | 2 K.NERFLK+ chrX@1556   | 2.88E-10 | 0.008833 |
| 8Mar2011- | 13961 | 694.37  | 19.51421 | 2 K.RYYTVVV chr3@1102   | 2.54E-10 | 0.005649 |
| 8Mar2011- | 16291 | 1108.08 | 22.38411 | 2 K.KGTQTLR chr4@9995   | 4.77E-11 | 0.001821 |
| 8Mar2011- | 12692 | 781.44  | 12.59146 | 2 _MIIQKYN chr5@1612    | 3.16E-10 | 0.007077 |
| 8Mar2011- | 5195  | 711.98  | 22.57839 | 2 R.K+14.016 chr5@1795  | 1.04E-10 | 0.003059 |
| 8Mar2011- | 336   | 401.73  | 12.41366 | 2 R.KADGGN chrX@1129    | 1.67E-11 | 8.34E-04 |
| 8Mar2011- | 17402 | 1196.64 | -22.9941 | 3 R.HSFLCICII chr1@1040 | 4.77E-11 | 7.81E-04 |
| 8Mar2011- | 3981  | 967.56  | 0.823991 | 1 R.KMAPVG Splice@chr   | 3.52E-10 | 0.00996  |

|           |       |         |          |                          |          |          |
|-----------|-------|---------|----------|--------------------------|----------|----------|
| 8Mar2011- | 16739 | 678.71  | -0.08905 | 3 R.ISK+14.0: chrX@9075  | 3.42E-10 | 0.008217 |
| 8Mar2011- | 16401 | 1099.56 | 8.366591 | 2 R.YCRLPK+: chr1@6377   | 5.13E-11 | 8.66E-04 |
| 8Mar2011- | 9569  | 868.45  | -17.0274 | 2 _._RLSWNLF Splice@chr  | 4.09E-11 | 5.33E-04 |
| 8Mar2011- | 15840 | 911.48  | -1.96641 | 3 R.LQRSDVK Splice@chr   | 1.06E-10 | 0.005548 |
| 8Mar2011- | 12345 | 1189.94 | -22.0398 | 3 R.NTRIPTKI Splice@chr  | 1.26E-10 | 0.001929 |
| 8Mar2011- | 18134 | 714.38  | -26.6936 | 3 _._DVDSA\ Splice@chr   | 2.39E-10 | 0.007955 |
| 8Mar2011- | 14794 | 1191.95 | -28.8355 | 3 K.NYLK+14. chr1@1531   | 5.53E-11 | 8.66E-04 |
| 8Mar2011- | 13597 | 877.46  | 16.0172  | 1 K.SYLFQYK. Splice@chr  | 4.14E-10 | 0.008145 |
| 8Mar2011- | 14834 | 942.49  | -25.2077 | 4 K.FDAKWLI chr2@2789    | 8.05E-11 | 0.001444 |
| 8Mar2011- | 2673  | 608.3   | -13.8887 | 1 R.SSTGAGK chr1@1504    | 2.94E-10 | 0.006962 |
| 8Mar2011- | 19325 | 742.41  | -20.6354 | 3 R.ERRQQT/ chr1@1007    | 6.58E-10 | 0.007973 |
| 8Mar2011- | 13690 | 614.58  | 23.81059 | 4 L.QPAYVPA chr3@3977    | 2.85E-10 | 0.006348 |
| 8Mar2011- | 13901 | 699.13  | 9.468299 | 4 K.WSRKMV chr2@2004     | 1.38E-11 | 4.61E-04 |
| 8Mar2011- | 1859  | 548.29  | -8.25272 | 2 R.SSRTFWF chr5@1468    | 2.55E-10 | 0.005709 |
| 8Mar2011- | 7189  | 771.42  | -28.8367 | 2 K.SK+14.01 chr2@1428   | 1.99E-10 | 0.005355 |
| 8Mar2011- | 8279  | 833.43  | -13.4911 | 2 K.LKSYLNT( chr3@4860   | 3.07E-10 | 0.00761  |
| 8Mar2011- | 16556 | 643.41  | 23.06034 | 2 R.QFPKIIGN chr1@4785   | 3.51E-10 | 0.004813 |
| 8Mar2011- | 18354 | 1122.96 | 5.657721 | 3 R.CSLFSKSI chr1@9775   | 2.80E-10 | 0.008725 |
| 8Mar2011- | 20329 | 1127.59 | -18.6366 | 2 R.ATNLWR chr2@1336     | 7.41E-11 | 0.001844 |
| 8Mar2011- | 14125 | 861.92  | -26.9187 | 2 _._K+14.016 Splice@chr | 3.58E-17 | 0        |
| 8Mar2011- | 13195 | 861.92  | -26.9187 | 2 _._K+14.016 Splice@chr | 2.76E-16 | 0        |
| 8Mar2011- | 13550 | 861.92  | -26.9187 | 2 _._K+14.016 Splice@chr | 1.28E-17 | 0        |
| 8Mar2011- | 13037 | 861.92  | -26.9187 | 2 _._K+14.016 Splice@chr | 2.38E-17 | 0        |
| 8Mar2011- | 15438 | 951.82  | -17.8722 | 3 K.RYVHK+1 chr4@1374    | 5.77E-11 | 0.00316  |
| 8Mar2011- | 17003 | 1000.04 | 24.8049  | 2 K.NCHFSQk chr3@1175    | 1.13E-10 | 0.003526 |
| 8Mar2011- | 555   | 408.72  | -0.59881 | 2 R.REIGGER chrX@1474    | 3.46E-10 | 0.00876  |
| 8Mar2011- | 3479  | 703.37  | 10.51499 | 1 R.EGLAGEK Splice@chr   | 4.27E-10 | 0.009528 |
| 8Mar2011- | 2318  | 703.37  | 10.51499 | 1 R.EGLAGEK Splice@chr   | 4.27E-10 | 0.00576  |
| 8Mar2011- | 16544 | 730.39  | 11.60385 | 3 R.CSEGQTV chr5@1482    | 1.17E-10 | 0.003386 |
| 8Mar2011- | 18140 | 1063.06 | 9.574224 | 2 R.K+14.016 chr4@1105   | 1.48E-10 | 0.004508 |
| 8Mar2011- | 13928 | 629.86  | -24.1359 | 2 R.QEKSGGF chr4@3488    | 1.11E-10 | 0.002907 |
| 8Mar2011- | 13703 | 1130.57 | -13.9407 | 2 R.RCHVFM: chr5@8581    | 3.22E-10 | 0.007155 |
| 8Mar2011- | 6929  | 552.79  | -23.6352 | 2 R.K+14.016 chr1@2515   | 8.57E-11 | 0.002463 |
| 8Mar2011- | 1222  | 403.23  | 10.8661  | 2 K.AVGMGMT chr2@7561    | 2.61E-10 | 0.00576  |
| 8Mar2011- | 6955  | 521.31  | -4.57496 | 2 K.QVLGERI. chr5@6515   | 4.19E-10 | 0.009099 |
| 8Mar2011- | 17740 | 1036.04 | 11.67606 | 2 _._RFRQQA( Splice@chr  | 5.11E-13 | 0        |
| 8Mar2011- | 18132 | 848.44  | -24.2976 | 1 K.TGRVCVF chr4@1585    | 8.26E-11 | 0.002789 |
| 8Mar2011- | 16095 | 1028.06 | 13.90623 | 2 R.NFIDKPTI chrX@1031   | 5.03E-10 | 0.00906  |
| 8Mar2011- | 6332  | 544.63  | -23.2534 | 3 R.SCIVEIIDI chr5@1600  | 1.60E-10 | 0.007138 |
| 8Mar2011- | 3569  | 493.75  | 8.856665 | 2 K.DFVDTVY chr4@6545    | 4.61E-10 | 0.009455 |
| 8Mar2011- | 14118 | 1145.6  | -11.503  | 3 _._LQNIYKR chr1@4509   | 2.29E-10 | 0.004642 |
| 8Mar2011- | 19201 | 1073.53 | -26.7291 | 2 K.KNKNFL chr5@6805     | 3.18E-10 | 0.00571  |
| 8Mar2011- | 20086 | 758.38  | 22.92073 | 1 K.SAETGHR chr1@1202    | 8.06E-11 | 0.001805 |
| 8Mar2011- | 1170  | 418.89  | 18.98794 | 3 R.QFLNCAF Splice@chr   | 2.33E-10 | 0.006238 |
| 8Mar2011- | 15573 | 872.48  | 4.482378 | 3 R.WKPTTT( chr1@1086    | 6.86E-10 | 0.008442 |
| 8Mar2011- | 16192 | 872.48  | 4.482378 | 3 R.WKPTTT( chr1@1086    | 1.59E-10 | 0.004084 |
| 8Mar2011- | 17065 | 1069.1  | -2.25724 | 2 K.RLK+14.0 chrX@1471   | 1.31E-11 | 3.15E-04 |

|           |       |         |          |                         |          |          |
|-----------|-------|---------|----------|-------------------------|----------|----------|
| 8Mar2011- | 7567  | 907.47  | -5.35475 | 2 K.IVNTEQIS chr5@6255  | 1.01E-10 | 0.002174 |
| 8Mar2011- | 1831  | 554.3   | -26.0331 | 2 K.KNKFVRC chrX@1301   | 2.68E-10 | 0.006427 |
| 8Mar2011- | 18544 | 1027.57 | -8.17807 | 2 R.SCKNRER chr4@1259   | 4.25E-10 | 0.009818 |
| 8Mar2011- | 6151  | 657.35  | 2.002517 | 2 K.K+14.016 chr1@1716  | 5.59E-10 | 0.007278 |
| 8Mar2011- | 3884  | 684.83  | -10.2256 | 2 R.EISITGDC chr4@1667  | 1.23E-10 | 0.003386 |
| 8Mar2011- | 14408 | 1010.52 | -11.7036 | 2 K.NKYYFK+ chrX@1019   | 2.52E-10 | 0.006435 |
| 8Mar2011- | 5031  | 793.92  | -23.6062 | 2 K.QINEKVA chr4@8035   | 3.73E-11 | 0.001422 |
| 8Mar2011- | 19060 | 970.51  | -20.0193 | 2 R.LYFEKK+1 chr2@1354  | 4.60E-10 | 0.008146 |
| 8Mar2011- | 16807 | 938.07  | -11.7892 | 2 K.KKTQILLR chr4@3115  | 2.39E-10 | 0.007424 |
| 8Mar2011- | 16429 | 1092.19 | -26.5386 | 3 Q.RQLHARI Splice@chr  | 9.30E-11 | 0.002431 |
| 8Mar2011- | 12191 | 1092.19 | -26.5386 | 3 Q.RQLHARI Splice@chr  | 1.30E-10 | 0.002651 |
| 8Mar2011- | 18505 | 1030.51 | 0.14933  | 2 K.ICIFEQAK chr4@5811  | 1.33E-10 | 0.004609 |
| 8Mar2011- | 9172  | 1053.56 | 4.196479 | 3 K.FFFGFFDI chr5@4519  | 1.38E-11 | 0        |
| 8Mar2011- | 6150  | 848.45  | -15.3406 | 1 R.FANANAI chr2@1102   | 2.54E-10 | 0.006983 |
| 8Mar2011- | 10099 | 504.29  | 0.305622 | 2 _FSNNLAA chrX@7544    | 1.01E-10 | 0.002797 |
| 8Mar2011- | 17773 | 1113.58 | 12.54217 | 2 R.DVQLTFN chr2@4865   | 2.62E-10 | 0.005295 |
| 8Mar2011- | 688   | 664.35  | 26.01524 | 2 L.ETKSNAS' Splice@chr | 3.06E-10 | 0.007889 |
| 8Mar2011- | 4486  | 723.38  | 15.63139 | 2 R.RRNRNM chr4@6564    | 3.00E-10 | 0.005378 |
| 8Mar2011- | 2310  | 908.47  | -0.46897 | 1 R.KDKGSM chr4@1405    | 9.10E-11 | 0.004962 |
| 8Mar2011- | 15010 | 664.37  | 22.0826  | 3 K.VVLHFSA chr2@1325   | 3.74E-10 | 0.008558 |
| 8Mar2011- | 14878 | 975.02  | -24.7945 | 2 K.M+15.99 Splice@chr  | 3.43E-10 | 0.008134 |
| 8Mar2011- | 2896  | 657.41  | 7.996722 | 1 _GAVAIAR chrX@1592    | 3.40E-10 | 0.007627 |
| 8Mar2011- | 862   | 473.81  | -12.7913 | 2 K.KKSVRTV chr3@1232   | 1.93E-10 | 0.005326 |
| 8Mar2011- | 22375 | 992.52  | -27.3564 | 1 K.TVDVHHI chr2@5211   | 2.23E-10 | 0.005922 |
| 8Mar2011- | 5859  | 482.74  | -17.8807 | 2 K.KTGGSSG chr2@9267   | 6.59E-11 | 0.001873 |
| 8Mar2011- | 7049  | 482.74  | -17.8807 | 2 K.KTGGSSG chr2@9267   | 9.90E-13 | 0        |
| 8Mar2011- | 6428  | 482.74  | -17.8807 | 2 K.KTGGSSG chr2@9267   | 1.15E-11 | 3.12E-04 |
| 8Mar2011- | 4459  | 564.76  | -15.4395 | 2 E.M+15.99 Splice@chr  | 7.76E-11 | 0.003015 |
| 8Mar2011- | 5362  | 462.25  | -0.39509 | 2 R.TGKMSSF chrX@1205   | 1.98E-10 | 0.006014 |
| 8Mar2011- | 7859  | 844.49  | 16.76308 | 2 H.K+14.016 chr4@7236  | 1.46E-10 | 0.002189 |
| 8Mar2011- | 5140  | 545.78  | -15.0808 | 2 K.NSK+14.0 chr4@4028  | 9.57E-11 | 0.00248  |
| 8Mar2011- | 12883 | 973.46  | -7.15506 | 2 R.NRRDSVE chr4@5459   | 3.22E-10 | 0.009327 |
| 8Mar2011- | 17765 | 1078.55 | -18.4653 | 2 K.KK+14.01 chr5@1970  | 3.06E-10 | 0.00761  |
| 8Mar2011- | 17146 | 977.49  | -22.3763 | 2 K.HWHRNI Splice@chr   | 8.05E-11 | 0.004007 |
| 8Mar2011- | 6069  | 621.37  | 22.62937 | 2 K.IHDSIKKC chrX@1165  | 4.29E-10 | 0.009099 |
| 8Mar2011- | 1964  | 576.79  | -0.84803 | 2 K.MMVVVI chr2@7470    | 1.60E-10 | 0.002969 |
| 8Mar2011- | 3339  | 489.73  | -20.8125 | 2 K.GWAEGG chr4@3942    | 3.25E-10 | 0.006612 |
| 8Mar2011- | 8298  | 593.84  | -6.17727 | 2 K.SRELGTG chr5@1881   | 1.97E-10 | 0.005896 |
| 8Mar2011- | 2449  | 425.25  | 5.275212 | 3 K.CRQKGAi chrX@6144   | 3.06E-10 | 0.007065 |
| 8Mar2011- | 18532 | 673.85  | -3.08421 | 2 K.KECEGGR chrX@8767   | 1.79E-10 | 0.005168 |
| 8Mar2011- | 9607  | 677.78  | -21.1932 | 2 R.ESKCSGG chrX@1721   | 1.05E-10 | 0.00205  |
| 8Mar2011- | 22639 | 1182.08 | -24.1681 | 2 K.KWFWSS chrX@8894    | 1.17E-10 | 0.004111 |
| 8Mar2011- | 12333 | 541.26  | -14.4606 | 2 K.ATYGGK+ Splice@chr  | 4.20E-11 | 7.19E-04 |
| 8Mar2011- | 5775  | 478.23  | -16.4495 | 2 K.NSTVSSG Splice@chr  | 2.95E-10 | 0.00444  |
| 8Mar2011- | 10858 | 945.02  | 3.685351 | 2 K.EEK+14.0 chrX@3957  | 4.11E-10 | 0.008515 |
| 8Mar2011- | 15112 | 896.42  | 4.536687 | 2 K.EK+14.01 chr5@9444  | 3.69E-11 | 0.001227 |
| 8Mar2011- | 11929 | 885.44  | 5.559748 | 2 R.SIEFNFFF chr5@4665  | 2.86E-10 | 0.006348 |

|           |       |         |          |                          |          |          |
|-----------|-------|---------|----------|--------------------------|----------|----------|
| 8Mar2011- | 15293 | 746.91  | 11.26039 | 2 S.AWTSISSI chr4@5676   | 2.54E-10 | 0.006947 |
| 8Mar2011- | 8905  | 540.61  | -15.7307 | 3 R.LAALETEI chr5@6744   | 1.99E-10 | 0.004883 |
| 8Mar2011- | 13837 | 879.46  | -23.856  | 1 R.GTPIWYK chr4@1057    | 3.87E-10 | 0.008332 |
| 8Mar2011- | 5795  | 462.2   | 15.35192 | 2 _._EGDQM+ chrX@3854    | 3.20E-10 | 0.00571  |
| 8Mar2011- | 17922 | 1021.04 | 22.49903 | 2 R.SRCAKM\ chr5@5268    | 1.43E-10 | 0.004508 |
| 8Mar2011- | 1884  | 967.42  | 22.35788 | 1 R.MDSDW\ chr4@2378     | 3.04E-11 | 0.001471 |
| 8Mar2011- | 8409  | 533.31  | 6.191819 | 2 K.LLDGEHIL chr5@5731   | 2.50E-10 | 0.006006 |
| 8Mar2011- | 4973  | 668.83  | -18.1535 | 2 K.FSKCLEIS chr3@6234   | 7.99E-11 | 0.002224 |
| 8Mar2011- | 12733 | 645.55  | 23.13301 | 5 K.KLSVTNIF Splice@chr  | 3.13E-10 | 0.007155 |
| 8Mar2011- | 4134  | 633.35  | 25.19297 | 2 K.QNSVRNI Splice@chr   | 2.35E-10 | 0.00586  |
| 8Mar2011- | 17284 | 740.01  | -19.6918 | 3 _._CLCSLPVF Splice@chr | 3.00E-10 | 0.008521 |
| 8Mar2011- | 637   | 417     | -10.1652 | 4 K.QLSK+14. chrX@2427   | 4.33E-10 | 0.008963 |
| 8Mar2011- | 1799  | 473.59  | 10.2462  | 3 R.ADRACEI chr4@1067    | 1.05E-10 | 0.00168  |
| 8Mar2011- | 12854 | 910.57  | 28.72129 | 2 K.FKNFQNI chr3@1034    | 2.83E-10 | 0.005394 |
| 8Mar2011- | 5672  | 869.43  | 3.168869 | 1 K.KFADMEI chr3@7559    | 3.70E-10 | 0.009404 |
